# Supplementary material for: Diverse modes of synaptic signaling, regulation, and plasticity distinguish two classes of C. elegans glutamatergic neurons
Source: eLife. 2017 Nov 21;6:e31234. doi: 10.7554/eLife.31234 (PMC5705214; doi:10.7554/eLife.31234)
Supplement: Figure 1—source data 1. [file elife-31234-fig1-data1.xlsx]

## Sheet: Fig 1A AWC GCaMP5
Source Data	Figure 1A	AWC GCaMP5 Data: Individual dF/F(%) traces
		Three trials per animal: Read from left to right; Trial 1 signifies a new animal
		Acquisition Rate: 10 Frames/sec
		Frame Rate	10 fps
		Stimulus On:	Frame 50
		Stimulus OFF:	Frame 350
Frame / Trial #	Trial 1	Trial 2	Trial 3	Trial 1	Trial 2	Trial 3	Trial 1	Trial 2	Trial 3	Trial 1	Trial 2	Trial 3	Trial 1	Trial 2	Trial 3	Trial 1	Trial 2	Trial 3	Trial 1	Trial 2	Trial 3	Trial 1	Trial 2	Trial 3	Trial 1	Trial 2	Trial 3	Trial 1	Trial 2	Trial 3	Trial 1	Trial 2	Trial 1	Trial 2	Trial 3	Trial 1	Trial 2	Trial 3	Trial 1	Trial 2	Trial 3	Trial 1	Trial 2	Trial 3	Trial 1	Trial 2	Trial 3
1	215.92	184.352	181.941	200.825	211.76	161.736	157.171	14.9167	50.4896	69.2478	97.3817	78.648	268.19	229.984	201.168	19.0364	33.3524	51.6413	162.449	132.539	113.426	158.181	129.222	69.4957	103.12	106.367	126.328	177.547	190.862	162.478	221.848	174.444	142.175	125.96	99.3595	68.7343	34.7031	67.6648	243.246	251.052	224.607	160.251	21.2837	29.0209	63.6638	41.9938	59.8539
2	213.306	181.249	178.144	193.395	204.753	155.277	146.691	12.8127	41.8559	60.123	89.7252	76.1478	263.34	225.321	196.207	17.6797	29.5674	50.9541	158.617	130.352	106.408	153.321	121.095	62.6645	96.0309	115.903	126.46	171.362	184.587	155.903	212.384	167.497	138.473	121.084	96.7167	66.8781	32.9826	65.8685	239.545	242.444	222.279	158.911	20.202	27.793	58.5657	36.9593	57.1724
3	211.123	177.376	175.055	186.899	195.856	152.327	135.336	10.4452	40.8866	57.0826	83.0863	78.4531	259.339	219.24	194.052	16.2579	27.0206	47.5489	159.14	125.006	99.1465	153.615	118.63	59.9961	89.6672	125.377	129.653	164.911	181.968	150.072	208.454	163.031	137.112	117.939	95.0924	64.0953	29.9522	65.2543	238.637	237.393	216.836	158.477	18.7204	27.8751	55.1203	35.3402	54.1981
4	210.349	174.457	174.299	182.583	188.567	148.457	128.011	11.0038	37.8112	57.0219	82.3881	86.7973	256.107	215.264	192.532	15.6348	26.7797	43.2396	160.668	120.432	91.8637	151.575	120.471	57.6852	86.9189	133.715	133.321	166.625	180.113	145.844	206.308	159.297	136.633	115.172	91.8714	60.732	28.7256	67.7795	234.858	234.498	211.644	158.778	17.9943	26.5892	53.492	31.6153	50.0614
5	208.93	172.715	173.229	178.138	182.01	146.605	120.647	11.0941	34.9684	61.8724	84.1427	93.5041	253.186	210.937	192.4	14.1608	27.6061	38.4924	160.721	114.973	86.3274	154.399	124.144	52.2116	84.0671	141.555	135.918	168.103	175.635	143.98	203.428	153.475	135.065	115.215	90.3031	57.4645	24.7154	69.5161	234.166	230.315	209.358	158.744	16.4883	26.1282	50.1566	29.9011	51.2385
6	206.687	171.12	170.593	173.168	176.83	148.911	116.044	9.88546	31.5966	67.6662	89.0466	98.417	250.177	209.216	191.271	12.6775	28.7548	34.3908	158.824	109.058	82.3529	153.292	122.385	47.6811	87.4253	147.009	134.003	169.379	173.366	141.915	198.281	154.369	132.717	115.46	90.291	58.9808	26.0168	73.9979	233.387	227.857	210.638	156.797	15.4984	25.4147	47.8622	30.0175	49.6413
7	205.28	169.925	170.129	171.147	170.823	150.973	110.751	7.40947	32.7076	74.1538	90.2016	102.258	249.299	206.717	187.771	11.8624	28.0231	31.6225	158.451	103.711	79.5526	151.42	122.627	45.3935	87.1418	146.096	132.052	171.602	172.158	141.981	194.631	153.904	132.505	112.268	91.2834	58.6184	26.1837	76.2647	232.498	226.947	206.314	157.54	15.0397	24.8523	47.8979	32.3423	52.3623
8	203.858	169.181	168.537	171.017	166.446	153.782	105.559	7.32438	33.0719	83.4635	93.6274	105.779	248.262	206.009	187.403	10.8715	28.3905	27.3457	155.394	100.796	75.932	151.91	118.769	43.543	90.6457	143.299	128.561	171.168	169.764	139.254	190.179	151.234	131.384	108.94	91.2055	59.3599	25.1081	75.0392	229.492	227.632	206.09	158.046	15.1685	25.3541	48.6852	36.9399	54.2339
9	203.29	168.37	166.306	171.15	159.51	154.209	101.311	7.28297	40.2537	96.6205	93.3273	104.326	245.747	203.902	186.2	9.79103	27.6274	25.6482	150.355	97.2235	70.617	152.047	114.023	44.2528	85.7815	137.767	130.381	169.789	171.576	136.574	185.951	151.044	130.851	110.166	90.3963	57.9675	25.4531	74.7486	233.078	227.541	201.03	158.374	16.4816	23.6898	47.6683	40.0948	55.4923
10	201.576	166.821	165.613	172.167	157.273	155.393	97.4115	6.36811	44.7462	101.454	91.3159	102.102	244.512	203.201	185.261	8.79062	23.5364	25.4599	146.334	95.6763	66.7708	158.583	108.696	41.4831	81.8695	135.846	133.423	171.04	170.104	132.422	187.241	151.331	131.291	106.391	90.0748	56.5839	24.5369	71.0659	234.102	225.537	200.016	158.343	16.4235	24.3923	45.9987	42.5215	53.0356
11	201.97	167.08	165.493	172.3	154.793	154.68	92.6854	6.78321	45.9358	105.524	93.4611	98.638	242.757	200.758	181.349	9.30181	21.6348	24.7054	145.26	95.8292	63.6855	165.522	104.65	40.0467	74.7261	135.013	134.314	170.461	168.729	131.605	181.603	152.329	131.335	107.112	89.9207	54.6832	21.8017	67.7096	235.745	224.481	196.52	158.052	17.3195	24.5929	45.0127	41.2027	49.5253
12	201.315	165.623	165.599	171.969	154.288	156.751	93.0322	7.93576	57.1865	112.851	94.2095	94.9377	242.805	201.467	181.153	7.8659	19.6665	27.0209	143.458	97.8966	62.4188	170.384	100.234	37.1854	70.4571	135.945	139.781	169.527	166.291	132.293	182.333	148.959	133.054	105.942	90.6523	51.6761	22.0932	64.6647	238.082	225.644	193.09	157.666	16.981	23.7043	44.2324	40.3394	46.5978
13	201.291	166.037	164.076	174.469	157.074	159.702	92.0852	7.63299	67.6782	115.976	96.259	90.5021	242.145	200.777	179.748	10.1371	18.8661	32.3666	145.982	100.264	60.9631	171.282	95.3107	37.2595	64.0336	133.782	148.632	168.572	163.76	131.986	181.626	153.319	135.185	107.142	89.4554	47.9183	21.5328	60.0548	238.146	227.023	188.622	157.622	16.9654	24.1618	42.2095	37.3048	46.7193
14	200.869	167.69	164.244	175.7	161.627	161.555	95.2087	11.1955	75.9244	121.704	96.8126	88.9802	243.219	199.507	179.67	11.7869	18.2322	38.8524	147.862	103.591	60.2924	176.169	92.521	41.9241	60.9221	131.206	157.565	167.797	163.036	130.741	178.407	154.873	137.673	107.491	88.7752	45.2893	22.0704	58.2854	238.764	225.662	186.269	158.215	16.8273	25.7758	42.5931	34.3095	46.8102
15	200.545	170.322	164.872	180.223	166.052	162.979	95.339	9.83975	79.1474	125.068	95.919	86.3149	242.917	199.585	180.015	14.0297	15.5191	43.1796	150.168	104.722	61.6927	179.422	90.7072	41.038	59.0274	131.533	161.364	165.578	162.435	129.805	177.559	158.133	143.768	106.078	86.0859	43.1813	22.1132	56.1936	238.653	227.266	185.908	157.797	16.042	25.6797	42.4287	31.5564	45.8573
16	199.769	171.904	164.417	181.263	168.806	163.472	100.111	9.98463	80.0617	123.406	98.3957	83.7652	243.322	198.457	180.865	13.8908	15.82	46.9116	151.274	103.498	65.7411	183.925	88.323	40.4828	61.0919	130.269	165.077	166.291	163.638	128.503	173.903	158.085	146.728	104.621	86.443	41.635	24.4876	55.7073	239.775	226.795	186.712	157.428	17.2038	25.6974	42.7302	29.5697	44.0827
17	199.926	170.484	165.364	184.028	172.619	161.481	101.608	7.39291	81.9147	124.896	100.239	84.6353	242.805	197.096	179.398	15.4288	13.5168	50.937	151.865	103.616	68.9548	185.07	85.6064	43.7147	62.0079	126.05	168.689	170.93	164.158	131.987	171.306	160.665	143.619	106.347	85.2811	39.8207	24.4868	57.7213	239.535	228.445	187.012	156.333	16.5793	28.5765	40.7293	27.1453	43.3921
18	200.696	172.099	166.629	181.636	183.107	156.769	104.224	8.02908	80.9425	123.942	100.415	85.498	242.402	196.101	178.43	13.7583	14.2487	49.9009	155.814	102.639	71.2805	184.289	80.5726	46.5955	67.4361	124.269	171.861	173.712	164.158	129.137	173.478	161.498	139.918	104.063	84.722	40.4988	25.2916	60.8076	238.617	228.218	185.369	155.261	17.6068	27.6197	41.9067	24.5623	43.5077
19	200.252	172.319	165.828	178.632	190.83	153.429	103.92	9.35144	83.0724	118.66	101.464	87.0108	241.745	193.087	176.198	15.0346	16.6905	49.4349	159.257	98.2911	70.8733	185.561	77.6779	48.9982	72.7668	119.435	175.508	176.852	159.19	127.815	171.576	160.448	140.421	105.257	84.3035	41.3864	27.2869	61.6196	236.818	228.014	180.941	154.866	17.2583	26.6095	40.7007	23.551	44.4708
20	199.567	171.432	166.961	176.101	197.065	155.899	97.4903	10.8152	85.8096	114.95	99.0246	84.7466	240.779	191.002	174.678	13.84	22.3685	46.3451	159.367	94.5806	70.4132	188.327	80.1378	53.3669	81.3431	119.39	172.572	176.54	162.98	127.327	173.768	159.479	140.133	103.772	85.228	42.7022	27.139	60.8949	235.27	225.744	179.162	154.172	16.9237	26.6054	41.3988	22.9256	42.6349
21	198.333	171.003	166.748	175.686	202.314	158.853	91.5151	12.9072	81.8551	114.268	95.166	84.1905	237.771	189.323	172.946	11.703	28.282	41.4963	156.556	91.6221	67.3651	192.021	81.502	56.0184	87.1018	126.29	166.266	178.196	162.796	128.32	174.282	159.042	141.575	104.868	85.3319	40.3583	27.8047	61.8949	233.241	224.511	173.36	153.42	17.4042	25.0229	43.2657	23.0748	42.2623
22	198.258	170.65	166.199	174.901	206.138	158.614	83.6154	13.9886	76.9549	109.231	92.1345	84.7356	237.468	186.671	170.711	10.9011	36.939	37.8889	154.286	84.5684	67.8307	195.431	81.3019	56.1164	94.6343	133.653	161.322	178.78	166.186	129.773	174.719	158.495	143.012	105.142	86.7162	40.4979	26.231	59.0539	231.149	226.022	169.471	152.779	17.0737	23.9991	42.1537	22.8982	41.5281
23	197.163	170.837	165.95	177.594	205.569	161.106	78.9555	12.3674	76.6534	103.486	89.5606	84.8091	236.119	186.893	171.523	11.1379	45.0807	35.5795	151.707	80.17	72.2076	196.301	80.9515	57.6601	100.795	143.906	155.923	179.301	170.617	129.131	172.992	156.333	140.949	106.769	85.1022	37.4525	26.0933	53.3826	227.338	225.736	168.103	153.031	16.7511	23.601	44.7242	22.2969	41.9315
24	198.314	171.097	166.264	180.025	203.538	165.573	78.7638	16.3008	71.6823	94.3861	87.3365	83.6356	233.035	186.2	172.735	8.65857	47.5851	33.1561	146.932	77.1239	69.4408	193.573	80.0135	60.4851	104.556	148.426	153.408	175.445	171.52	131.692	172.328	151.463	140.943	108.249	81.931	34.9511	25.5078	53.4323	231.688	224.22	169.221	153.45	16.1051	22.7983	46.9665	23.4461	40.8686
25	198.241	172.693	167.972	179.638	200.236	169.591	78.1478	18.9312	66.1629	88.2625	88.5375	81.3232	231.796	185.914	173.068	7.85096	48.3262	33.1426	147.576	72.25	64.642	189.347	79.3391	60.3482	103.46	148.261	151.468	175.006	170.187	130.852	170.697	149.592	139.047	106.572	81.4882	32.7089	28.2839	50.9286	228.97	223.237	168.135	153.762	14.8657	21.9656	47.8745	23.7721	41.5524
26	197.819	173.288	168.574	182.726	196.13	174.079	78.2346	21.4309	61.2995	84.6151	93.0036	79.5757	232.202	185.012	172.571	7.67419	47.6004	33.8925	148.123	70.0561	60.884	187.986	79.8706	59.4355	104.004	147.673	147.655	177.432	172.265	123.611	167.797	147.787	140.165	109.534	80.0894	31.6083	29.9372	49.7018	228.176	221.641	167.389	152.909	15.4167	22.0935	50.5991	27.0958	43.4281
27	195.429	173.635	167.722	182.9	194.263	177.658	80.1894	21.1367	54.5443	83.2604	94.9281	82.5607	233.962	186.43	174.323	8.09358	43.205	34.308	153.121	67.2132	59.1432	186.551	77.4614	57.0012	98.3328	147.58	146.525	178.016	171.201	120.393	167.176	150.675	139.722	109.417	79.2676	32.5569	32.7837	50.8734	231.418	220.802	166.025	152.788	16.0875	21.8364	55.3578	26.8443	40.5276
28	196.993	173.291	167.3	181.227	194.656	181.747	82.6355	20.3855	53.4242	84.332	93.2551	85.6775	234.877	187.648	174.814	8.9785	38.3274	34.9044	152.334	66.0268	54.4172	182.079	71.1529	54.3357	93.7808	145.686	144.939	177.715	169.242	119.036	166.603	151.454	139.884	106.482	78.073	34.6198	35.3575	54.3135	232.143	218.908	166.347	152.215	17.3329	22.1449	58.7159	26.6301	40.1447
29	195.761	175.06	167.503	181.351	193.407	181.799	89.5188	17.4479	51.7528	89.3135	91.2543	83.9585	234.962	187.457	175.366	9.12834	35.0626	34.3946	154.536	63.1024	49.9468	175.674	68.4882	51.4892	87.3324	145.331	145.047	177.344	164.998	119.774	165.852	151.649	136.191	107.849	77.3214	34.9404	35.2043	58.7692	231.935	221.082	165.607	151.773	18.4496	22.4259	58.6064	28.4142	39.2291
30	197.634	175.271	167.164	181.876	191.752	181.225	91.2194	13.8346	49.6956	90.0315	86.6331	83.494	235.303	189.421	174.971	9.99985	34.2572	32.0114	155.677	60.3302	46.9263	175.639	64.0782	53.1306	85.2436	144.027	146.895	175.684	162.405	116.752	168.216	152.569	132.386	107.962	73.2192	35.436	36.2756	63.7794	233.723	217.149	166.816	151.316	19.095	23.6291	59.4493	29.2961	39.1001
31	197.474	175.697	167.112	182.198	189.779	181.286	90.0176	14.7269	48.0921	95.0305	85.0442	80.329	234.802	190.118	174.821	11.0434	31.1209	31.8191	155.239	60.8605	44.1641	177.316	62.5043	52.737	82.953	144.942	146.622	175.97	156.661	117.87	170.72	148.46	131.178	107.703	71.8016	32.2916	36.9738	72.5592	232.803	219.824	167.563	151.159	20.2663	24.2897	59.1838	28.8342	37.8098
32	197.369	175.41	166.927	183.665	186.201	182.037	94.1886	13.3592	45.3775	103.036	87.7095	76.9133	234.682	188.546	174.311	12.4014	28.8362	29.1109	154.866	61.8701	43.7622	184.056	68.9348	50.2433	82.0091	142.107	142.986	173.756	159.606	114.299	169.828	154.71	130.054	106.558	72.8242	31.8673	38.8812	76.7947	235.376	218.646	168.309	151.752	19.8143	25.3143	55.8461	28.2418	38.0274
33	196.347	173.811	165.803	187.074	181.608	181.937	95.1115	13.3077	42.3479	105.969	87.2562	73.0837	233.489	187.455	176.222	14.8115	26.0621	26.1352	158.136	67.6893	41.7391	189.748	76.8937	51.0274	78.4258	142.905	140.954	174.897	161.912	114.557	171.956	150.137	127.049	107.697	76.3545	29.9798	40.2946	76.6324	233.673	217.652	166.066	152.438	19.4643	24.2968	53.4459	29.7318	39.6296
34	197.294	175.509	164.971	194.335	176.611	179.034	94.3985	11.582	40.4687	111.241	86.6573	70.8311	230.716	188.832	178.186	17.3538	24.8538	24.0624	162.223	74.5344	45.2033	191.902	82.6044	50.047	72.3063	144.091	139.078	175.719	163.941	113.55	173.441	146.685	126.227	107.852	75.6244	28.9738	38.9531	76.774	233.366	217.232	165.989	152.867	18.5468	24.2015	49.1742	29.444	44.4535
35	196.936	175.223	165.003	200.442	172.784	177.255	95.7981	10.0058	42.6511	113.366	83.9544	68.6172	229.496	188.896	178.005	19.4565	23.3902	24.329	164.849	80.6497	49.6039	191.344	89.0169	48.6139	68.4293	146.474	136.375	175.318	164.9	113.258	176.585	145.124	125.07	108.602	79.501	29.9661	36.333	75.205	232.976	215.752	166.252	153.031	16.9543	23.407	45.9216	28.7044	48.6832
36	196.436	174.595	165.779	206.276	166.484	177.038	92.3909	10.4323	43.5905	112.496	83.9333	68.0996	229.388	187.455	179.275	20.7276	22.9034	23.8748	168.736	87.1854	48.0314	189.521	92.063	50.5714	61.7021	147.098	136.06	173.674	163.259	112.467	176.84	142.962	125.163	106.815	78.8849	28.6093	35.1564	73.6553	233.427	213.941	167.539	153.694	16.8521	22.4318	42.0063	29.8274	50.2263
37	194.16	174.017	166.335	211.75	160.808	170.746	89.8499	9.98288	45.8306	108.186	83.8551	70.3121	230.206	186.433	175.95	21.3252	23.4889	22.9124	171.796	92.8366	47.7882	191.84	96.4756	49.4817	55.5533	151.676	136.95	171.374	162.286	111	175.563	142.674	125.844	108.177	77.976	30.9449	30.7221	73.4286	231.64	214.551	168.505	153.564	17.0174	21.48	42.1802	29.3278	52.0985
38	195.154	176.229	165.888	216.742	156.537	171.04	92.2934	8.82034	48.2073	102.942	86.1139	74.5488	232.813	185.452	174.913	23.0049	24.4397	25.4485	171.975	97.9926	45.6109	192.24	99.2738	49.3116	53.0778	154.467	143.437	169.69	164.358	112.248	173.724	143.879	123.324	109.239	77.5678	32.957	30.7589	76.2701	234.822	215.25	165.108	153.461	16.7394	22.5822	40.7371	29.581	58.221
39	195.499	175.588	164.874	220.986	153.306	167.857	96.4911	7.13778	49.0834	98.9632	86.288	81.0497	233.496	185.425	175.228	25.2451	26.0919	24.8087	171.17	98.1883	46.7283	192.908	102.64	46.2506	49.7143	151.43	149.651	169.071	167.518	111.215	174.679	142.114	124.475	110.325	79.3592	36.2354	30.2325	76.5953	234.725	212.204	166.709	152.365	18.2411	22.6437	40.3853	33.45	61.5752
40	194.553	174.212	163.782	225.5	151.985	161.678	101.353	5.72478	45.548	93.5596	84.411	84.5445	235.6	185.149	176.155	26.2104	24.8954	24.0546	169.283	97.2837	52.3533	195.368	103.715	46.2359	48.0397	153.232	155.906	168.777	168.926	113.759	174.366	141.852	123.912	112.241	77.6035	40.4395	32.242	77.2759	236.032	211.634	166.347	153.124	17.2176	22.7237	36.4298	34.3834	60.9503
41	195.472	173.265	163.606	228.33	151.154	158.554	104.14	8.21238	45	92.882	84.5035	89.4462	236.915	184.74	174.839	25.1713	23.3134	23.0603	170.404	95.7543	55.6829	197.377	104.656	45.6401	46.0689	152.616	162.321	173.517	168.717	119.799	174.58	140.452	124.553	112.559	75.5166	42.2213	34.2481	77.1217	236.473	212.019	164.603	152.712	16.4671	22.3769	37.2782	36.0843	62.1327
42	195.691	173.06	163.527	231.895	152.361	159.753	105.033	9.30896	48.592	91.0437	82.9455	89.9897	234.152	184.757	176.068	23.2378	20.8935	20.7606	167.632	97.8425	56.7337	197.514	99.87	44.817	45.3309	154.001	166.033	174.825	169.052	122.7	173.355	136.546	124.629	109.836	76.8841	48.3448	39.7722	75.2883	236.619	212.845	166.608	152.836	16.9923	22.6682	39.8321	37.0144	60.7514
43	195.806	171.907	161.476	235.774	153.472	160.668	100.911	11.6366	51.6042	93.7409	81.6549	85.7099	234.863	183.584	174.625	21.6496	20.6947	19.5929	166.964	101.145	55.4974	195.379	95.3376	44.5962	45.2286	152.977	168.74	175.539	167.442	126.39	175.1	137.27	123.997	109.456	75.8553	48.2729	42.6376	73.0701	236.541	213.661	162.486	153.696	16.6115	21.5579	40.3188	37.478	57.9206
44	195.646	171.104	163.531	237.002	158.478	161.444	96.7533	9.56959	52.2023	100.209	82.9105	78.3638	235.563	181.421	172.222	18.8065	17.1195	20.2724	164.34	103.721	53.3675	193.256	89.6102	46.7529	46.1862	149.397	169.518	183.257	166.956	124.702	177.539	134.966	124.425	107.053	73.8836	52.3647	42.7067	72.0222	236.12	215.645	162.647	154.083	15.897	21.8863	40.9643	39.9792	56.8865
45	195.362	170.52	162.704	237.877	165.979	164.315	89.8115	8.30228	52.1316	104.853	84.7454	74.4737	233.605	180.543	171.611	16.8132	18.0829	21.1829	163.642	109.159	52.2326	191.196	83.667	45.9762	44.992	147.904	167.294	187.6	164.535	123.841	177.443	137.892	126.538	105.081	74.7268	52.6235	40.711	71.2818	238.721	216.529	164.184	153.702	15.1023	23.4389	39.6445	43.8032	53.7099
46	196.273	171.78	162.347	237.712	175.632	169.514	82.6143	9.50161	53.0229	111.382	90.1895	71.337	233.88	179.79	170.867	15.9978	18.0798	22.9449	162.332	119.367	50.252	191.328	80.2771	47.0697	43.0338	147.943	163.151	186.509	164.296	123.272	179.031	137.22	128.008	106.405	75.7782	51.3957	42.1898	67.4161	239.172	214.807	164.321	153.932	15.4212	22.9987	38.4607	45.4596	54.3183
47	195.814	172.068	161.463	235.243	179.132	172.435	77.5861	8.4756	51.6229	113.154	91.4881	72.4468	231.946	179.827	170.234	15.0477	18.8595	23.2687	160.456	125.693	51.5796	190.108	79.4124	45.4704	39.9799	145.992	158.57	189.396	163.356	120.793	178.131	137.452	128.427	105.504	78.5293	49.8576	39.4227	65.9794	237.644	219.115	171.654	152.949	14.6433	22.2056	35.9001	47.0139	58.947
48	195.767	171.147	157.973	232.234	184.452	171.729	78.763	10.3673	48.5253	114.002	92.2052	75.2687	230.797	181.539	170.892	12.21	21.3074	24.3237	160.663	132.715	52.4928	187.984	80.8751	43.548	38.9864	143.826	155.997	192.209	159.998	121.119	178.627	135.627	127.046	104.657	77.8965	50.9712	41.168	63.9353	238.418	218.798	173.27	153.428	14.1254	20.9093	35.6664	46.8817	60.4628
49	195.176	171.529	156.814	226.857	189.005	171.284	85.3115	11.2757	44.7443	118.904	89.4849	79.989	230.637	183.07	170.975	12.6956	23.6304	25.4704	160.534	133.029	52.3489	188.37	80.3458	41.6309	39.7739	141.87	151.755	191.815	162.364	120.807	177.344	134.945	125.491	103.179	76.2712	52.2399	43.7431	63.1229	238.264	217.567	175.938	153.378	13.8859	20.2587	36.434	43.8213	58.3429
50	196.758	171.69	155.866	220.658	192.908	171.387	94.541	12.4201	44.0915	121.469	87.3072	81.883	230.643	182.844	168.444	11.9488	25.8561	24.2362	161.633	134.989	56.6889	190.934	80.2987	39.7083	45.1778	143.03	148.99	183.878	161.041	120.308	179.207	137.61	124.744	100.81	77.7037	50.8276	46.0533	59.4782	238.799	217.585	176.441	152.352	13.7797	18.9797	36.1683	43.2935	53.5968
51	196.543	170.834	152.695	216.847	194.94	171.519	103.953	14.2705	41.6294	120.746	85.2788	84.3217	228.734	181.003	165.434	12.3968	28.0248	22.8375	162.649	135.817	58.0421	192.836	83.8143	38.4644	51.3919	145.691	144.132	184.323	153.282	116.047	174.85	131.139	124.42	99.6447	71.7407	47.983	45.2037	56.0842	237.895	212.72	174.687	149.758	12.9975	17.9929	33.1011	39.3762	48.4562
52	197.064	169.735	153.54	214.576	193.48	168.853	110.583	15.0723	40.4559	123.433	81.5917	83.3517	227.648	178.886	169.31	12.1456	28.9279	21.0297	167.254	138.239	58.9073	191.598	86.4889	34.2724	61.6158	142.791	139.068	173.24	143.857	109.022	163.897	126.32	116.434	91.5533	66.9604	44.927	39.1924	50.3059	230.005	203.696	164.119	146.559	12.1832	17.7523	31.5996	37.1863	44.5011
53	195.709	170.814	152.195	211.308	189.861	165.169	111.83	15.5518	35.527	118.668	75.5519	80.0271	227.073	173.903	166.19	10.7239	26.4717	19.7089	168.289	133.41	54.8162	191.868	84.9321	31.2052	69.0775	135.912	134.36	160.475	132.481	97.9415	149.88	115.275	108.118	85.2961	63.3344	40.2497	33.7035	47.1633	219.57	193.46	158.07	142.408	9.97605	16.0655	28.026	32.4147	39.7565
54	192.758	166.79	147.172	205.803	179.691	155.988	102.905	13.4316	32.9561	109.796	67.9951	74.6298	224.988	167.368	157.566	10.0879	25.6114	18.4733	161.107	124.608	49.2772	183.005	77.1665	28.2672	67.4777	126.746	126.076	145.561	119.394	86.7272	137.428	101.986	98.8247	78.8746	56.8006	36.0858	31.2569	42.2522	207.093	181.486	146.002	138.679	9.56151	14.3362	27.1082	30.2701	36.9046
55	189.028	161.608	141.614	199.682	172.464	150.043	94.7737	11.0373	30.5833	97.8448	60.1622	65.4126	217.846	156.242	146.232	9.15194	21.4388	15.548	154.366	115.769	44.4373	172.374	70.2252	25.0945	60.0495	119.029	117.571	133.44	107.712	77.2198	121.623	89.0394	90.2002	71.3084	51.3212	32.0566	27.2195	37.9861	194.136	167.609	133.738	134.297	8.71342	12.787	24.2106	25.7934	33.6649
56	183.681	156.176	136.136	191.411	164.716	141.009	86.1034	9.78228	26.6711	88.383	51.6421	57.853	207.793	145.376	136.78	9.18245	20.8211	14.5595	144.169	106.832	39.3131	160.218	61.5005	22.2152	54.6459	109.453	110.832	122.812	97.796	71.2037	106.113	80.085	85.8746	66.7294	46.366	28.688	25.4933	33.4821	181.839	156.294	122.461	129.724	7.84658	12.4083	22.9481	23.6132	30.5347
57	177.862	150.11	129.166	183.919	157.353	132.64	77.8853	8.59199	23.6058	78.3308	45.0765	50.1198	196.04	135.261	125.653	6.95508	17.6297	13.8124	133.65	97.3046	35.5196	150.088	55.8605	18.2023	48.1998	101.061	103.068	109.752	84.6674	63.1721	95.5954	70.6733	78.1737	59.75	43.3565	25.2067	22.7517	31.4464	167.049	143.531	109.999	126.555	7.24781	10.9089	20.2971	21.9276	27.7568
58	171.962	144.348	123.995	175.764	147.673	127.875	69.1869	7.0799	19.9621	68.1616	39.82	43.8672	184.748	125.471	115.435	7.6449	15.9156	12.5335	124.754	87.762	29.3206	139.176	48.7277	15.955	42.6095	90.7872	94.8082	99.1493	77.9445	56.9386	85.1236	60.3375	71.4128	55.7392	38.4985	22.7444	18.9426	28.2929	156.071	131.215	101.241	122.422	6.34148	10.2825	17.9822	18.9979	25.1613
59	165.979	137.229	117.705	167.283	140.464	118.053	62.063	6.53979	18.3281	62.1282	36.0137	38.9413	173.209	114.489	106.113	5.81967	14.9851	11.267	116.468	80.5152	26.5794	127.406	44.2969	14.5489	38.1091	85.4741	88.5474	88.2546	69.6095	49.4333	73.2303	54.1067	65.7774	52.8646	35.3505	21.3817	17.611	24.0379	143.528	118.914	93.5462	117.774	6.34923	9.5485	17.9815	17.5843	22.9336
60	161.321	133.01	111.776	160.395	132.712	112.601	56.9069	6.54781	17.8498	51.9339	31.4521	32.5796	162.266	105.287	98.5398	5.70374	14.1341	9.99019	106.759	72.7201	23.5293	118.087	38.4042	10.9506	33.4216	77.7016	79.5019	81.7614	62.48	45.28	65.8565	46.0898	59.3812	47.4027	31.8036	18.028	16.5746	22.2312	128.905	108.809	83.9839	114.493	5.98008	8.86852	16.4254	15.4284	21.0533
61	153.369	125.001	106.637	153.118	124.59	105.499	50.916	5.57376	15.1939	47.4225	27.9187	29.4661	151.013	97.717	89.2379	5.83572	11.7843	9.6537	99.555	67.3409	21.4655	108.81	33.2939	12.209	28.9715	71.3439	74.6983	70.7503	54.3134	39.6054	55.9567	41.4759	54.8834	42.2381	29.3159	14.9999	11.4932	20.6375	118.121	96.8537	76.4655	111.121	5.4744	7.72053	14.9986	14.7506	18.6677
62	149.149	121.699	100.053	144.576	119.06	99.3013	46.1098	5.16646	12.5706	41.9095	24.5444	26.1685	141.628	88.8144	83.7114	5.79871	10.7296	8.58486	91.3439	60.751	18.9882	99.0583	32.3316	10.6488	24.81	66.672	68.8226	63.5575	49.0496	33.7178	51.3767	36.1829	48.0908	42.9254	26.5855	14.9868	12.8146	17.3116	110.525	89.8681	69.7152	106.951	4.47664	7.74718	14.309	12.8815	16.4285
63	142.764	115.642	97.9808	137.819	111.545	93.1081	40.777	4.39183	13.4871	37.2021	22.6462	22.7495	130.767	81.0909	76.2661	4.72631	9.59658	7.10017	84.7204	55.6952	16.5875	90.9131	27.8569	8.62424	23.6201	60.8735	64.0372	58.3595	43.1128	31.276	44.6061	33.0694	43.4842	38.4515	25.2743	12.6841	12.7809	15.776	99.8039	81.4396	62.7469	103.679	3.75337	8.16047	12.3178	12.5659	16.1463
64	137.731	111.001	91.773	129.678	104.181	86.5506	36.5327	3.67383	10.6341	34.2196	20.1483	20.4096	122.521	73.2429	68.7287	4.47333	8.99885	7.23925	77.8776	49.6209	15.4679	81.6111	24.4067	6.3335	20.6031	54.8032	57.5616	53.2225	41.3066	28.3359	40.8736	29.8625	41.425	35.1111	23.8373	11.836	11.6758	16.0825	92.3381	75.1374	56.4804	99.8586	3.73659	6.34108	11.6658	9.86184	14.8856
65	133.092	106.171	88.2734	123.345	97.5455	80.0002	32.6743	4.16577	11.0944	29.2219	17.9603	17.8502	112.642	67.8066	65.5185	4.89391	8.3878	7.05516	70.8073	44.6191	12.6369	75.7007	22.5058	7.87516	19.4825	52.111	54.4938	47.4668	36.3089	24.0921	35.6065	24.1468	36.9311	33.1309	22.1236	10.1764	8.4674	13.7079	83.9739	67.7751	51.7295	96.9413	4.49899	7.1923	11.9013	10.6972	12.3935
66	127.299	101.072	83.7268	116.343	90.736	77.033	31.3827	2.96277	11.455	26.8362	14.3919	17.377	105.136	61.5386	59.3103	4.42887	6.91563	7.24306	64.9695	40.899	11.2167	67.2701	20.3027	6.87133	16.027	45.533	49.716	42.259	32.7272	22.1391	33.462	22.2768	35.0918	30.5954	19.5193	8.7092	8.48868	13.525	76.275	61.9024	46.2898	92.6234	2.89777	6.0898	11.1778	10.2904	12.431
67	121.329	96.6154	79.5842	110.129	85.2388	71.0324	28.2611	2.86258	8.43921	24.1383	13.5121	13.6296	96.1367	56.4593	53.5766	3.67389	6.77522	6.08757	60.2938	37.5156	10.4528	63.0425	18.1312	4.65869	13.6855	41.9695	45.7495	38.0104	29.8527	20.8091	29.2989	19.4273	32.4616	28.3151	18.4381	8.40785	8.44013	11.987	69.471	54.9033	42.8053	89.5361	3.46358	4.96903	10.7635	8.13467	11.2937
68	116.332	91.0588	75.1708	103.373	79.4825	65.09	24.325	3.95567	8.20695	21.2319	13.2567	14.4349	88.2674	50.0589	49.3399	4.36877	6.42045	5.29448	54.6639	33.4889	9.44166	55.8082	16.8482	4.9776	12.4456	38.5938	41.2865	33.8672	26.1227	17.6035	25.1801	18.0889	29.1159	25.5739	14.447	7.66984	7.04884	11.4272	62.9249	50.459	38.8258	86.1613	2.83786	4.93697	9.65828	8.7649	10.0452
69	111.508	86.4033	72.2916	96.6148	74.1926	62.2052	22.4557	2.39881	8.01662	20.2778	10.2087	11.9665	80.8438	45.2954	45.7163	3.30619	5.15824	4.60529	49.9958	30.678	8.72243	51.2028	13.6677	3.64422	11.7068	36.146	36.7666	32.6686	22.8039	16.0252	22.3113	16.4807	26.8236	23.204	14.6876	7.67456	4.52361	10.8699	57.9236	47.5815	34.1837	82.7678	2.96183	5.35818	9.91472	6.63065	9.14475
70	106.351	82.4833	66.7601	92.3721	70.0944	58.3465	19.9724	2.43214	6.8127	17.6299	9.76126	11.108	74.4977	42.5341	42.361	3.97346	4.16399	5.1399	45.9721	26.1619	7.93506	44.755	13.077	4.02989	10.17	32.167	35.1169	29.2545	23.3737	16.0404	20.9606	14.5654	25.6107	20.5777	13.7586	6.43886	5.38275	8.82611	52.2769	42.0767	33.3222	80.0243	3.10824	4.53839	8.06747	7.25445	9.36977
71	100.989	76.4843	62.9948	85.2549	64.2747	54.7378	18.9845	2.84314	7.19051	15.4166	8.05293	9.59073	67.86	37.1915	39.0329	3.5824	5.44052	4.57688	42.6378	24.2975	7.51656	42.3263	12.1385	3.6118	9.32645	29.7558	32.2946	24.8249	19.1856	13.5235	18.8838	12.21	23.044	20.2423	13.4591	4.86079	5.90879	7.75874	48.1528	37.5603	29.0518	77.4812	1.98303	3.4664	8.12124	5.32893	9.50491
72	95.8926	75.2568	59.3297	79.4558	60.5706	50.5358	18.1516	1.40294	6.51605	14.6468	7.37187	8.67973	60.7709	35.2913	36.1503	4.03723	4.20352	4.16922	38.4487	21.9695	6.57201	38.847	11.7819	2.5574	9.59716	27.5839	29.8811	24.7285	17.8441	13.3512	17.6484	12.4353	22.6915	18.5881	12.0307	5.28733	4.53031	8.52781	46.0478	35.7183	26.2399	72.8715	1.30659	3.44182	6.46956	6.67659	8.11465
73	90.9808	71.0947	57.7511	74.4035	56.9292	46.0546	17.0631	1.11129	5.56104	13.4375	6.53322	8.30338	57.3154	31.356	32.828	2.51461	3.87997	4.3875	35.8392	20.5772	6.68856	34.9914	9.69949	2.31064	8.25655	24.9734	28.0882	21.7854	17.4476	10.6014	14.1585	11.19	20.6505	16.2682	11.4556	4.37382	4.00961	7.67336	40.1206	33.207	24.5997	70.4313	2.10338	3.75774	7.97717	6.35497	6.7139
74	88.1039	68.1064	54.4238	70.67	53.2336	44.1201	14.1991	1.96691	5.82279	10.6637	6.368	7.17187	52.0841	28.1415	30.0968	1.73676	4.38277	4.08549	33.4899	19.357	5.02086	33.0089	8.98153	2.06172	5.18762	22.349	25.2681	19.4534	12.8316	10.6458	14.4822	10.9683	18.2977	16.9429	9.95985	4.62477	3.00116	6.51908	36.9096	29.4	22.7931	66.6319	1.49486	2.94399	7.76033	5.83933	7.05724
75	82.5012	62.8603	50.5646	65.9196	48.2731	41.8048	13.8925	2.03364	6.31477	11.4977	5.43015	6.3721	47.3284	26.0805	27.5134	2.17412	3.36259	3.44343	31.0982	16.1949	3.84287	28.4276	9.04411	1.30871	5.35205	20.5477	23.4877	17.8514	14.9523	10.6897	9.21576	9.52067	17.6275	13.4194	8.74108	4.10822	4.36703	6.27151	32.1675	27.4335	19.6345	65.4712	1.35185	3.11461	5.76083	5.0848	6.3476
76	79.3631	59.942	47.9938	60.4603	46.2434	40.7534	12.7052	1.88634	5.13348	10.0703	6.10677	4.90608	42.9902	23.6786	25.3053	2.84726	3.59168	3.69627	29.0537	14.8939	5.50108	26.6494	7.62359	1.64766	4.3401	18.8914	20.3958	16.1783	11.4991	8.57878	11.9646	8.32392	15.4211	12.3245	9.16474	2.97641	2.40972	6.75316	27.9375	24.0371	18.7049	63.2891	1.21881	2.89356	6.88613	5.42043	5.57884
77	72.766	56.3582	45.1006	56.6837	43.6327	36.7115	11.4167	0.11624	4.75868	8.11234	5.43184	5.34421	38.9192	22.4047	21.9375	2.87873	3.321	2.61178	25.4294	13.7977	4.38216	24.8123	6.60971	1.46235	3.76522	17.1862	19.7289	13.8815	12.394	8.68205	10.2715	7.21897	13.54	10.0091	6.59225	3.15548	2.35919	5.62681	26.803	22.6156	17.2599	60.1209	1.64518	1.2935	4.52744	4.63634	3.89776
78	70.5737	52.6792	42.8344	53.3221	40.4717	33.7809	12.2745	1.10021	4.21776	9.54687	4.97913	4.4983	36.9169	19.3972	20.2667	2.24384	2.03331	2.80529	23.8485	12.5894	3.95172	21.7623	6.91792	1.74515	3.53762	16.4759	17.9434	14.348	9.53983	8.16924	8.31745	6.95472	12.0893	10.2343	6.45602	1.41278	1.89895	6.33718	23.5359	22.4086	15.2837	57.812	0.4981	1.80958	4.99177	3.8199	4.04479
79	67.7521	50.062	39.0459	50.4354	37.8494	32.1656	9.84885	1.25082	3.94959	8.18929	3.90796	4.75996	33.5013	17.8263	19.7911	2.46024	2.22241	3.84225	22.266	11.1639	2.93268	21.2853	6.55519	0.0338118	3.82833	15.1123	17.23	12.0232	8.3035	6.68592	8.79528	7.30378	12.4011	10.5431	5.37036	3.3063	2.63812	4.59726	23.4587	19.7291	13.1815	53.8158	0.904804	1.94348	5.54141	4.2539	4.30312
80	62.8893	46.6576	37.1558	45.5898	36.7059	28.6606	10.7212	1.8954	3.43978	7.25633	4.57581	2.52795	31.2758	16.6916	18.1599	2.34035	2.7394	2.05453	21.2571	9.29187	2.8352	19.0378	4.39948	0.697525	1.81477	13.9626	14.5275	10.8355	8.35906	7.43667	6.41803	6.18445	10.5877	9.0838	4.80128	3.42134	2.43511	4.0283	20.0377	18.2269	14.2156	53.26	0.700106	2.08657	3.4764	4.12262	4.15298
81	59.7884	43.579	34.77	44.5496	32.5144	27.79	9.76579	1.64502	3.63727	7.0844	4.11481	2.91912	28.2795	15.2261	15.8675	2.30643	1.8849	2.24268	19.0329	8.85465	3.10927	18.1714	5.96768	1.02675	1.77272	10.3268	13.4726	10.4076	6.87745	5.71525	5.91618	4.4871	10.9353	7.90522	5.29326	1.30685	1.9289	2.63236	17.9638	14.879	11.3191	50.6484	0.350047	1.66325	4.62619	2.81922	2.96433
82	57.673	41.7067	32.7528	41.5742	31.5408	24.9992	9.80545	0.152376	4.73936	6.2147	2.24491	2.64114	25.7735	13.8571	14.8108	1.50692	1.06862	2.20555	17.5133	8.40919	2.26885	17.1483	4.56039	0.624151	1.92292	9.35136	13.5756	10.2398	7.0138	3.54935	7.39931	5.3555	9.76257	7.01534	4.48339	1.69195	0.484867	4.61245	18.3237	14.3857	9.94108	48.225	0.714697	2.32432	5.66854	3.79039	4.20322
83	54.6835	38.6759	31.0081	37.7351	29.0232	23.4012	7.89418	-0.111398	3.70747	7.17318	2.00855	1.34406	23.8479	12.433	13.7962	2.29347	0.197647	1.62569	15.9619	8.34128	1.74515	14.5756	4.24443	-1.04192	0.148547	10.677	10.671	10.8684	5.62502	5.05808	6.30823	4.77368	8.70631	6.71462	3.89316	2.35204	1.36486	3.62714	17.8779	13.2116	10.5683	46.848	-0.0672656	1.37803	4.42574	2.35675	2.47996
84	51.4631	37.5655	28.8385	35.3903	28.1002	21.2007	7.88985	1.25153	2.48205	5.69535	3.58157	1.5712	22.1291	11.2295	12.682	2.62708	1.70706	1.56991	15.5026	6.65042	1.70311	12.6217	4.58275	0.627464	0.934372	9.67349	11.4609	9.36068	5.95219	3.13773	6.4835	4.94365	6.84432	7.31264	4.33623	1.12242	0.0581854	2.68308	15.682	12.8468	9.91369	43.6405	0.483145	0.704247	3.47046	3.17043	2.51031
85	48.3564	34.7232	25.6334	33.0178	25.7729	21.564	8.00112	1.87006	1.77972	5.26117	2.07874	1.29439	20.6618	10.3332	10.0204	0.812081	1.06547	0.959107	14.3729	6.08908	0.505876	12.0368	3.52228	1.05895	1.33692	8.84859	9.15185	6.78752	5.62248	4.93837	5.1515	2.1924	7.19037	5.74082	3.96194	2.04985	0.886937	1.58729	12.5975	12.1667	6.58723	41.6946	0.890681	0.149936	4.3365	2.49883	3.24022
86	45.5977	31.5139	25.4757	30.8392	23.7775	20.5285	6.71281	0.837486	1.97657	4.38529	1.47364	2.30594	18.2332	8.89575	10.7345	0.994304	1.72756	0.325104	11.7286	5.90053	1.21622	12.0907	3.66211	-0.51347	0.771576	8.23969	7.85616	5.82273	2.0059	3.14463	3.74939	3.00503	5.95281	6.01541	3.18762	2.37433	-0.351276	2.67797	12.9712	9.73338	6.46645	39.8101	0.106576	0.571072	4.10268	3.37073	2.8947
87	42.6176	30.2047	24.3397	29.8744	23.1751	17.8757	6.25224	-0.302779	3.02701	5.04122	1.37617	0.975335	16.5017	8.26664	9.45502	0.581678	0.37102	1.20249	12.1242	5.05065	0.497381	10.3124	3.02602	-1.55914	-0.46237	6.55563	9.62295	6.28669	5.07533	2.23642	5.12976	2.50707	6.23779	5.42081	2.97807	2.64256	0.449697	0.592198	12.3522	10.6905	5.30657	37.6695	-0.442206	0.639596	3.27614	3.46619	2.727
88	40.6773	29.677	24.5977	26.0662	21.8002	18.5314	7.18797	1.12473	2.25181	4.77096	1.00368	1.22884	15.9357	7.66989	8.26342	1.20215	-0.00141713	1.83735	11.4782	4.06535	1.08633	7.13279	3.07331	-0.965091	-1.48034	5.62802	5.88609	6.25249	4.35278	1.48478	4.3509	1.90214	4.4264	3.055	2.84078	1.50518	-0.839085	1.58722	9.60538	9.95913	5.99827	35.5819	0.00376668	0.342433	2.85802	0.768667	1.90673
89	38.0183	27.8562	22.7575	25.5478	20.7793	16.4293	4.17318	-0.188696	3.34979	3.30597	0.822878	0.684143	13.9845	6.74866	7.13629	1.94713	-0.0944067	1.18889	11.0031	4.41846	0.261958	7.62863	0.932661	-1.88815	-0.0863139	4.5936	6.14894	5.44824	4.10955	3.72521	5.3387	3.32923	5.24573	2.7933	1.52508	1.22907	1.35621	0.830539	9.71829	8.12065	4.1912	34.8614	-0.845925	-0.435909	3.80928	1.87104	1.91794
90	37.1505	27.0659	20.8198	23.2626	19.793	15.2105	4.33454	-1.02541	3.6365	4.97409	0.801125	1.05934	12.2488	5.43285	7.84447	0.94598	-0.260593	0.83991	9.15643	3.19339	0.639696	8.49854	-0.00183931	-0.573307	-1.23535	4.6768	5.98455	5.73932	1.84312	1.82335	2.11536	3.57498	3.97236	3.10136	1.58243	-0.418668	-0.30384	0.426739	9.92057	8.03429	4.77554	32.2141	-0.234834	-0.633498	1.96357	1.16283	1.97074
91	34.7308	25.0143	19.0534	21.641	17.4701	12.4333	5.99769	-1.06887	1.27992	2.95649	1.05607	1.06402	11.2171	5.61629	6.75078	0.832227	0.700629	1.38542	8.69175	2.60228	0.221376	6.58417	1.19045	-1.47058	-0.907855	3.80912	4.84041	6.58918	2.47414	0.97923	4.68136	1.17383	4.42194	4.18991	1.6686	1.12232	0.983951	1.93105	7.50003	6.95287	5.28806	31.4038	-0.505224	-0.276122	3.03187	1.17943	1.89844
92	33.1365	22.6097	18.5613	21.1319	16.3507	13.811	4.72838	-1.14802	1.89085	2.36633	0.220489	0.459914	10.0605	4.12955	4.83292	2.19218	-0.174901	0.835717	8.16234	1.95319	0.555207	6.21073	0.320653	-0.969327	-2.29157	4.03644	5.69612	3.89618	1.21532	2.97126	3.14022	2.72582	5.05078	2.10698	0.418779	0.00889258	-0.0916163	0.17902	7.2174	5.49192	4.98052	29.0729	-0.342813	0.0258663	2.35846	1.29713	1.48809
93	31.0765	20.6769	17.0939	19.8236	16.2818	12.4737	3.67734	-0.149846	1.54044	2.8734	0.892625	1.12238	9.72002	3.7271	4.22205	1.51168	0.148511	1.05823	7.48571	1.34074	-0.61472	5.37361	0.650516	-1.40263	-1.55336	2.6852	3.78887	4.77488	1.95304	0.897934	3.73143	0.615291	3.4688	2.17062	0.411152	1.13667	0.342288	1.35603	6.34101	4.67354	3.02686	27.4413	0.213821	0.388689	2.12544	1.01702	1.23389
94	29.7548	20.2602	16.9592	18.1727	14.1772	11.7988	2.87828	1.1257	2.4872	1.72357	-0.867029	0.848643	7.52322	1.53567	4.81202	0.365478	0.58775	0.37315	6.92419	2.63278	0.339579	5.22317	0.673259	-1.0664	-2.72462	3.54464	2.16349	3.39596	2.00474	0.224458	3.15415	2.37214	2.99898	-0.0471591	0.00611742	0.57699	0.313904	0.196703	5.61992	2.96657	2.56057	28.0765	-0.775002	-0.196791	2.23314	1.07173	0.865312
95	26.3049	19.0339	14.4456	16.2991	14.986	11.0031	4.28031	1.13244	1.64696	2.53481	0.183242	0.230191	6.95437	2.77408	3.48927	1.13705	0.180143	0.0253481	5.94721	2.37092	-0.452319	4.4085	1.19455	-1.73351	-2.90775	1.88066	1.60662	3.71143	1.54456	0.704177	2.59434	1.16308	3.62921	1.12833	0.57265	0.557791	0.105146	0.121858	5.80666	4.06035	2.47436	25.3248	-0.483067	-0.177268	1.48794	1.82553	1.31951
96	25.0082	17.8522	13.4088	15.546	12.8689	11.3033	4.68101	0.651929	2.815	1.80883	0.729754	-0.371367	6.42279	1.11363	3.48089	0.666064	-1.20451	0.655142	5.37659	0.618731	-1.08889	4.50254	-0.279885	-1.75847	-2.30644	1.6036	3.86787	2.99409	0.0166245	0.619657	3.07372	1.01054	2.32084	0.805945	-0.221302	-0.0470338	-2.0785	0.74508	5.62496	3.37432	0.981364	24.2176	-0.747119	-0.550512	2.35069	1.53829	0.514752
97	24.248	16.5029	13.298	14.9964	12.8213	9.21386	2.69118	-0.936865	1.84898	3.28389	0.603755	0.147998	5.28348	1.44613	3.11426	0.305231	-0.40416	0.593527	4.88715	0.522492	0.56188	4.07245	0.218297	-1.67689	-2.54728	2.44003	1.66416	3.80141	0.317219	1.36998	1.66415	0.667816	0.606225	-0.652016	0.658738	-0.679965	-0.657316	0.55956	4.97104	3.90353	2.31254	23.1818	-0.354351	-0.401553	2.45861	1.10667	-0.362262
98	22.8731	16.1314	12.2926	13.1769	11.6613	9.58615	1.76952	1.74461	0.717904	1.4421	-0.767361	-0.734249	5.651	1.32974	1.83907	1.18028	0.172784	0.316339	4.83825	0.952183	-0.337792	5.2617	-0.834021	-2.99371	-3.37166	1.3894	1.0604	3.02694	1.5925	0.364833	3.81263	2.22392	2.23934	-0.663771	-1.12863	-0.238132	0.390707	0.277288	4.18113	2.94739	1.88138	22.028	-0.671378	-0.92407	2.00875	1.15002	-0.944166
99	22.2175	14.3293	10.5948	13.5912	9.66614	8.11466	3.64605	0.115965	1.78046	2.738	-0.744509	-1.04867	5.23529	0.166753	0.906626	0.787657	-1.04254	0.868847	3.75853	1.33534	-0.195094	3.29505	-0.426609	-1.72049	-3.01517	0.390338	0.844454	2.12393	-0.512671	0.239556	1.66587	0.735051	0.935208	0.139549	-0.339821	-1.12157	0.174754	-0.281593	3.21632	1.97813	0.528693	20.9772	-1.05491	-0.656908	1.89633	1.84173	0.064319
100	21.1317	13.4492	10.339	12.1646	10.5797	5.21667	2.53336	-0.72561	1.5725	1.20012	0.428237	-0.857918	4.86121	0.661996	0.819399	0.304208	-1.10014	0.69581	4.59422	0.482408	-1.55938	3.73013	-0.969197	-1.38231	-3.43239	1.12661	0.153158	2.64778	0.0878523	1.75869	2.24993	1.2644	1.41026	-1.11972	0.37843	-0.893369	-1.46346	-0.84015	1.81996	2.84916	1.83701	19.1668	-1.22796	-0.872587	1.56551	1.13479	-1.15392
101	20.1087	13.318	10.451	11.1819	8.44096	8.4294	3.13725	0.804587	1.46431	1.25704	-2.00217	-0.549442	3.02493	-0.896339	1.46689	0.654186	-1.10109	0.964848	2.62026	0.206398	-0.461791	3.29484	0.0842501	-2.2411	-3.02895	0.290777	-0.123293	3.07535	1.02691	0.295973	1.42867	-0.247916	-0.618837	-1.10737	-1.8729	-1.39492	-0.321442	-0.15949	3.62481	2.10725	0.228704	18.4308	-0.813937	-1.06087	1.51794	1.62069	0.27701
102	17.6117	11.6594	8.60772	10.1158	9.3753	6.23383	-0.417606	0.0953468	1.31458	1.65314	0.963433	-1.23972	2.78558	-0.500302	1.297	0.503484	-0.668994	0.682984	3.61574	0.517693	-1.9124	2.61853	-0.334859	-3.24553	-4.02135	0.969378	-0.0575091	0.703665	1.33056	1.27863	0.987274	1.02151	-0.114764	-1.63938	-0.884958	-0.807401	0.380329	0.0457657	2.37035	1.16226	0.216327	17.0749	-1.16197	-0.777171	0.989062	1.67739	0.141664
103	16.4191	11.2395	8.58946	8.89776	8.21095	7.19774	2.20813	-1.27354	-0.511089	0.697241	-0.298081	-1.37108	1.72342	-1.68381	0.626055	0.892534	-1.38508	1.09166	2.98705	0.383419	-2.78663	2.41234	-0.955706	-2.05673	-2.60349	-0.43462	0.271781	1.64885	-0.404467	0.618881	0.848093	-0.723722	0.0467777	-1.36439	-0.965132	-0.624989	-0.434169	0.416619	2.99519	2.00763	-1.50463	16.4577	-1.18643	-0.935278	0.863398	1.16298	-0.645153
104	16.5069	10.0105	8.47065	8.20169	7.28494	6.78862	1.99325	-1.70072	0.647719	1.27532	-0.805976	-0.307234	2.03301	-1.46953	1.13302	0.266466	-1.56823	0.388485	3.07498	0.532252	-0.533536	1.89901	-2.23632	-2.05878	-4.02357	-0.824096	-0.388268	1.1279	0.288341	-1.31861	0.636097	0.305062	-0.407669	-1.64548	-1.46769	-2.79805	-1.35359	-2.18937	2.8148	0.3203	-0.976328	16.2593	-1.32709	-0.785492	0.512814	2.11992	0.147496
105	15.2794	11.3824	6.97195	7.74328	6.6102	5.86606	0.491635	0.320166	0.548779	1.41989	-0.186924	-1.18989	1.54379	-1.44509	0.566135	0.127898	-0.737013	0.590659	1.14537	-0.702597	-0.995007	0.594055	-1.23092	-2.54969	-4.23928	-0.820314	-1.70683	0.22094	-1.38241	1.0294	1.44178	0.64841	-0.694872	-2.21388	-1.40146	-0.976503	-1.69837	0.0418505	1.3425	0.0915374	-1.61704	14.7098	-1.40957	-1.00577	1.87285	1.7959	-0.545252
106	13.6941	8.74239	6.29116	7.70539	5.62651	4.03284	2.98798	1.34849	0.593973	1.44484	-1.52185	-0.414762	0.48638	-1.97162	-0.279499	0.415395	-0.143716	-0.215352	1.41454	-1.07788	-1.91608	1.06396	-0.954039	-2.71661	-3.22725	-2.01554	-2.10078	0.497483	-0.467748	-0.236932	0.755926	-0.485182	0.188233	-2.38322	-1.89051	-1.63975	-0.795522	-0.0156305	0.476631	-0.0127799	-1.68514	12.8558	-1.39905	-0.706183	1.93095	0.286032	-0.914308
107	13.0279	9.03326	5.43574	6.64434	3.98176	5.62834	2.34038	-0.897571	0.463295	2.24491	-2.43077	-0.281154	0.185448	-2.44859	0.682722	1.66243	-1.56033	0.428347	1.73942	-0.93077	-1.34389	0.565506	-2.49953	-1.55982	-3.69782	-1.19472	-1.5705	0.966175	-0.310786	-0.826844	2.07218	0.203487	-0.599352	-2.56788	-0.690994	-0.754931	-0.636327	-1.13558	1.04559	-2.55579	-1.28071	12.9213	-0.930306	-1.19399	1.29144	1.09315	-0.645036
108	12.4026	8.38156	5.93108	6.64333	5.62371	5.19932	1.61405	1.3455	-0.263183	1.64222	-1.05563	-1.65818	-0.664696	-2.40848	-0.388821	0.268575	-1.51936	0.0349743	1.74321	-1.45346	-2.52565	-0.321193	-1.43705	-1.89897	-3.63446	-1.42544	-1.71049	0.324757	-1.69198	-2.74238	-0.0659865	-0.22526	-0.609603	-1.38981	-0.52463	-1.79212	-0.203272	-1.54007	0.641185	-1.49266	-1.90973	11.9916	-1.73434	-0.189448	0.749098	-0.856448	-1.36343
109	11.6792	8.50229	3.35584	6.67762	4.76242	4.9077	2.79612	-0.368283	0.556578	1.91597	-1.15761	-2.25023	-0.103257	-3.25669	-0.651836	0.479802	-0.479535	-0.056626	0.324672	-1.89969	-1.19566	-0.224427	-1.68572	-2.36684	-4.64379	-1.16649	-2.65811	-0.628526	-0.49681	-0.359908	1.07322	-1.58156	-0.583868	-2.87676	-0.627288	-4.31634	-0.464337	-2.20419	0.284768	1.22144	-2.46511	11.3128	-1.12458	-0.621044	0.262961	0.338048	-0.803091
110	10.7825	6.40235	4.81239	5.31346	4.28499	3.05766	1.90766	0.448002	0.906643	1.94918	-1.69493	-1.29519	-0.597684	-2.16808	-0.537024	0.590693	-1.09505	0.34858	2.80837	-1.78621	-0.590999	0.995348	-2.07202	-1.8012	-4.32043	-1.26899	-1.37646	-1.70549	-1.9355	-2.5906	0.304961	-1.55293	-1.97636	-1.78982	0.0287983	-1.51298	-0.945949	-0.948209	-0.388725	-0.458655	-1.77387	9.39161	-1.66894	-1.64715	1.09957	0.846903	0.249193
111	9.9949	6.58094	3.58521	5.33128	4.19728	4.11255	2.06877	-0.56058	0.678899	0.517791	-1.297	-1.03165	-1.25261	-3.32871	-1.66223	0.884744	-1.02754	-0.636811	1.63816	-1.64373	-1.64908	-0.271493	-0.670081	-2.99409	-4.64796	-1.7557	-2.94746	-0.0835538	-1.28467	-2.2374	-0.0883257	-0.00791573	-0.107186	-0.388251	-0.554632	-3.0954	-0.440275	-1.34499	-0.813072	-1.82276	-0.800919	8.35003	-1.03056	-1.47169	1.57517	1.19264	-0.89259
112	9.78148	6.27803	4.10826	4.89333	3.91019	2.69634	1.82823	0.242103	1.51908	0.642848	-1.72288	-1.19446	-0.279697	-3.72872	-1.24684	1.25746	-1.92378	0.76542	1.35837	-2.79226	-1.2961	-0.388603	-2.57984	-3.34382	-3.97267	-1.25307	-2.49637	0.0202821	0.0747058	-1.10092	0.809597	-1.31986	-0.430192	-1.67668	-0.836953	-3.01315	-1.00334	-2.23253	-0.757702	-1.12092	-1.06476	9.42199	-1.52849	-1.0798	0.299287	0.56648	-0.815143
113	8.52295	6.20999	3.62725	4.10739	3.80075	3.18395	1.1354	-0.860215	0.215575	1.3457	-2.57163	-2.34985	-1.50226	-3.263	-0.811325	-0.547445	-2.44822	0.0789321	0.452608	-1.01203	-2.1075	-0.564282	-1.49174	-3.30912	-3.95153	-2.52514	-2.38066	-1.0101	-2.04735	-1.9043	-0.535571	-0.0176287	-0.553959	-2.53187	-1.8578	-1.90602	-0.870264	-0.570969	-0.188908	-1.73174	-1.56982	8.4403	-2.38096	-1.5995	0.24374	0.458193	-1.01771
114	8.59069	5.0638	2.38794	4.5479	3.21649	2.45493	-0.314925	0.110351	0.822141	0.397422	-1.5307	-1.58486	-1.41293	-3.12171	-1.30711	0.14261	-0.983089	0.0137142	0.346015	-1.93913	-1.5349	-1.43428	-2.69872	-2.37712	-4.28286	-3.34401	-3.51753	0.857353	-2.54936	-2.70801	-0.33134	-0.660978	-1.89479	-1.18937	-0.715469	-2.4003	-0.507329	-2.61145	-0.680355	-1.63379	-1.71511	7.43498	-1.67483	-0.708784	-0.0759959	-0.299809	-1.72609
115	7.60688	4.28499	2.04408	4.6954	3.71451	2.48296	1.33635	-0.742275	0.377753	0.20902	-2.19405	-2.0962	-0.834134	-2.96003	-1.13375	0.470839	-0.830364	-0.999238	-0.313171	-2.82834	-1.74672	-3.14051	-2.195	-2.2409	-4.17077	-1.73422	-2.07501	-0.600419	-1.25046	-1.62592	-0.0329404	-0.241751	-0.898925	-1.74586	-0.896406	-2.63214	-0.446218	-2.03066	-0.163026	-2.20035	-2.98935	7.11804	-1.68602	-1.35278	-0.683362	0.658186	-1.336
116	7.1227	4.78895	1.80397	3.78409	2.57675	2.00543	0.126621	0.489649	1.14327	0.0988321	-0.867043	-0.63356	-1.7569	-4.0688	-3.04039	0.580865	-2.03224	-1.17515	0.814851	-1.42638	-2.3339	-1.52241	-1.98718	-3.4305	-4.66192	-2.24157	-2.48012	-1.87611	-0.871705	-1.84068	1.41527	0.179016	-2.04299	-2.516	-1.01125	-2.32596	-1.73687	-1.0957	-1.68405	-1.77976	-2.32508	6.65129	-1.73047	-0.971005	0.025626	0.26195	-0.364933
117	4.59081	4.03285	1.59376	1.77534	2.19591	0.859253	1.33712	0.802176	-0.403187	-0.168224	-1.61831	-1.25992	-2.56052	-3.35169	-2.70101	0.347209	-2.14889	0.620427	0.0988763	-1.79326	-2.02623	-0.754709	-1.74679	-3.03853	-4.5866	-2.85009	-1.82753	-0.0901647	-2.7197	-1.35733	-0.788359	-0.49812	-1.03014	-1.13189	-1.57711	-3.25687	-2.00606	-1.73259	-0.358673	-2.26282	-1.99548	5.02704	-1.59669	-2.15923	0.351308	0.151029	-0.947648
118	5.51373	3.29251	2.27385	2.77047	-0.420385	1.77802	2.63723	-0.192287	-0.292385	-0.376076	-2.20772	-1.7827	-2.71572	-5.09002	-1.93654	0.353986	-1.24993	-0.00119912	-0.156457	-2.66765	-2.78849	-1.57657	-1.98668	-3.39936	-5.44166	-2.19847	-2.74244	-1.08562	-1.67816	-2.09529	-0.221712	-1.55221	-2.04189	-2.4351	-1.99237	-4.22808	-2.51446	-1.67645	-2.89665	-1.98672	-3.34033	5.03915	-2.29295	-1.52713	1.94173	0.053542	-1.12738
119	5.38637	4.62523	1.45421	3.11434	1.59404	1.22765	1.51516	-1.43605	1.41287	0.836459	-1.60993	-1.29904	-3.12971	-4.68695	-2.55366	0.101075	-1.74887	0.526919	-2.15611	-1.88679	-1.38548	-0.540828	-2.31053	-2.7979	-3.35993	-3.0119	-3.91356	-0.188103	-2.96105	-3.4131	0.0560789	-0.83705	-1.48266	-2.74108	-2.59407	-2.267	-2.56684	-1.5021	-0.961842	-1.6955	-1.92476	4.74587	-1.80153	-2.53171	1.0292	-0.296665	-1.26292
120	3.70342	3.2282	1.24081	1.60629	2.14886	1.69367	0.931897	-0.781683	0.109032	-0.359045	-2.00846	-2.12624	-2.53559	-4.88963	-3.4239	0.0658467	-2.29942	0.0710087	-0.666926	-2.49585	-3.26105	0.184014	-2.67504	-3.46226	-3.75005	-2.75623	-2.91458	1.29821	-1.09224	-1.27178	-0.901236	-0.618297	-0.261492	-2.13494	-1.76904	-2.02896	-1.56272	-1.69402	-3.77593	-2.62038	-2.46259	4.06189	-1.36487	-1.81217	0.573942	-0.304556	-2.09534
121	4.88366	2.68634	0.981132	2.68088	0.521758	1.71198	-0.112291	-1.71562	0.728042	0.175715	-2.06866	-2.10359	-3.39325	-4.55216	-2.53013	1.07197	-1.1656	-0.57495	-1.22306	-2.50416	-1.55282	-1.03447	-3.12083	-2.97642	-4.69791	-2.55438	-2.39824	-1.26968	-0.782614	-2.32381	-2.10271	-1.10815	-2.31497	-2.63021	-2.26706	-3.32662	-2.75927	-0.687462	0.0450771	-3.00907	-2.37158	2.79922	-1.30764	-2.01052	0.923364	0.0512373	-1.69388
122	4.77153	2.04113	0.443343	1.79691	1.10418	0.912395	-1.04779	-2.59612	-1.18685	-0.403671	-2.90201	-2.04265	-4.4942	-4.57846	-1.97456	-0.92039	-1.90998	-0.347396	0.175773	-3.80031	-1.9343	-0.750147	-2.35955	-2.92931	-4.73742	-4.17204	-3.49022	-0.777098	-1.47696	-2.09269	-0.64577	-0.89945	-3.02964	-2.16031	-2.48018	-3.03646	-1.89715	-3.1338	-1.48605	-3.61089	-2.72787	2.89546	-2.60245	-1.86892	1.21021	0.392207	-0.896531
123	3.50789	1.223	0.622812	0.684466	0.824061	0.144543	0.713222	-0.553074	0.112321	0.265636	-2.45201	-1.85772	-2.79269	-4.29908	-2.50589	0.167635	-0.870405	0.011014	-0.595307	-3.5289	-2.4688	-1.17595	-3.10903	-3.29435	-5.0881	-2.96526	-4.71811	-1.37337	-2.91348	-2.47011	-0.296012	-1.68385	-2.63214	-2.62076	-1.29571	-3.37863	-2.74925	-1.60312	-2.17055	-2.23608	-3.61301	3.16066	-1.92855	-1.83974	-0.500016	0.0720906	-0.480697
124	4.00715	-0.788332	-0.430344	2.26221	1.57429	1.30412	0.721291	-0.93161	0.597553	-0.916294	-2.14576	-2.17188	-2.40405	-5.056	-2.59951	-0.180804	-1.85743	-0.574574	-0.875354	-2.17296	-3.03089	-1.30754	-2.75922	-3.77701	-4.49811	-3.62486	-3.20673	-1.86822	-2.31971	-4.19509	-0.379714	-1.94787	-1.42878	-2.14061	-2.27319	-2.76926	-3.20112	-2.01847	-1.23229	-5.94097	-4.43559	2.01891	-1.74524	-1.41587	-0.29681	-0.147307	-2.73194
125	3.47484	0.386335	-0.639572	1.47477	0.886936	0.925952	0.571254	0.388386	0.935613	0.974717	-2.40145	-2.46065	-3.89925	-5.26626	-2.20103	0.346994	-1.64609	-1.01477	-1.69725	-3.19753	-1.88006	-0.776086	-2.89192	-2.88627	-5.60946	-3.12201	-2.7246	-0.862703	-2.99723	-1.80971	-1.63314	-2.21156	-2.79351	-2.16706	-2.93132	-3.80538	-1.03465	-0.533605	-1.88475	-2.58016	-3.4555	2.07585	-1.45439	-1.51137	-0.118715	0.396739	-1.86677
126	2.87232	1.30925	-0.982956	0.639705	0.445631	0.609443	0.812182	-0.3599	0.0794476	-0.0412328	-1.43012	-1.95883	-4.37994	-4.52365	-2.86044	0.326816	-1.51617	-0.496678	-1.14696	-4.20132	-1.69743	-2.78124	-2.51275	-3.53765	-4.95969	-3.38058	-3.9108	-1.61018	-1.08767	-2.54143	-0.784881	-0.799602	-2.42331	-2.41235	-2.70049	-3.64742	-1.08298	-0.8482	-1.44264	-4.90334	-3.64248	0.728604	-2.26164	-1.40685	-0.547539	-0.0592045	-1.90475
127	2.31122	1.058	-0.954879	1.54361	0.350463	1.31455	0.33612	-2.30548	1.2144	-0.359996	-1.95876	-2.11747	-3.72078	-4.42849	-2.88688	-0.344417	-1.81295	-0.289039	-2.33821	-2.95162	-3.20091	-2.39354	-2.54209	-2.65026	-5.01698	-3.4375	-3.24254	-1.73392	-1.60897	-2.98141	-1.90993	-0.0871935	-2.68538	-3.73193	-3.69382	-3.80142	-1.7254	-1.43809	-2.34701	-3.84535	-3.69333	1.52567	-1.97038	-1.63375	0.43955	-0.29728	-1.1454
128	2.66875	0.0582172	-1.36543	0.47313	0.777037	-0.171636	1.01992	-0.247262	0.730666	-0.23709	-2.40648	-2.48858	-4.28921	-4.746	-2.39316	0.255409	-1.87204	0.0353495	-2.44711	-3.64444	-1.9805	-2.94848	-2.7452	-3.35187	-4.90788	-3.68656	-3.86339	-2.1632	-3.81297	-2.40103	-2.30068	-1.42928	-1.45103	-2.45001	-3.07978	-3.08013	-2.29155	-2.69917	-2.37207	-4.99551	-3.12306	1.4056	-1.85182	-1.96217	0.261393	0.406634	-1.62831
129	1.6752	-1.53941	-1.82645	0.147322	-0.654698	-1.61716	1.28404	-0.765887	-0.0109675	-0.706258	-2.02552	-2.71459	-3.09933	-5.47371	-3.78271	0.225224	-1.499	0.0756535	-2.38345	-3.18166	-3.33994	-2.2228	-3.70818	-2.36211	-4.5861	-4.40656	-4.92506	-0.649849	-2.41698	-2.93366	-1.67808	-1.14099	-3.29566	-2.13844	-2.88953	-3.70719	-1.8191	-1.74031	-1.78339	-4.28601	-3.87855	1.47645	-2.01507	-2.33837	0.105823	-0.236481	-1.39847
130	1.47215	-0.0649558	-1.9733	-0.0352016	-0.844134	-0.692826	-0.496647	-0.185073	-0.0819146	-2.02137	-2.92656	-2.55881	-3.96447	-4.8651	-3.26996	0.0942283	-1.4703	-1.66201	-2.08205	-2.89669	-2.52634	-2.96888	-2.61839	-2.94486	-4.9299	-3.08507	-4.81009	-0.568884	-1.87245	-4.22846	-3.31505	-0.0607837	-2.75553	-3.42407	-2.80127	-3.74411	-2.90726	-1.8579	-1.43528	-5.01993	-2.9776	0.34451	-1.75599	-2.24713	-0.0962652	0.376448	-1.7767
131	1.82151	-0.0115784	-1.53015	-0.310817	0.0955509	-0.359918	-0.922022	-0.986282	-0.00986795	-1.06492	-1.50396	-2.04105	-4.42898	-5.43186	-3.58689	-0.212173	-0.941804	-0.740806	-1.54486	-3.41438	-2.23135	-0.88462	-1.867	-3.15639	-4.94196	-3.11718	-4.11845	-1.35279	-3.2227	-1.5108	0.0472495	-0.392592	-1.96278	-2.50979	-2.34838	-3.73749	-2.32371	-3.11462	-2.78517	-3.92959	-3.35099	-0.352836	-1.72995	-1.32486	1.08466	-0.681777	-1.34249
132	0.297056	-0.681072	-1.22184	0.0147422	0.750124	0.704233	-0.361297	-0.502363	0.384222	0.637113	-1.64265	-1.07169	-4.92485	-5.10339	-3.55099	0.091082	-2.42209	-0.358747	-1.08402	-4.11075	-2.23107	-2.69576	-2.93056	-3.7425	-4.7061	-3.36435	-3.87508	-2.51991	-2.5152	-3.2772	-1.33889	0.238544	-1.67729	-1.98484	-3.21649	-3.25385	-1.34336	-0.521293	-2.19974	-4.8396	-2.75704	0.451779	-1.35916	-1.64551	0.0553431	-0.367729	-1.99632
133	0.689987	-0.838639	-1.83731	-0.626984	-1.46509	-2.25538	0.698464	-1.19545	-1.17917	-1.51254	-1.28294	-1.50255	-4.80599	-4.81266	-3.65558	0.33882	-2.27767	-1.05116	-1.22454	-2.8442	-2.99509	-2.41822	-2.32845	-3.37609	-5.0619	-3.82682	-4.40424	-2.56911	-2.30424	-1.74153	-1.19906	-0.593761	-2.60846	-2.95184	-2.9581	-2.96161	-0.692673	-1.67915	-2.45726	-3.99296	-3.81392	-0.654345	-2.60786	-1.82946	0.958529	-0.721235	-0.915607
134	0.61798	0.0316697	-2.83758	-1.17462	-1.6588	-1.1714	-0.213366	-0.483723	0.523032	-1.33432	-3.41383	-1.94122	-4.96953	-5.0421	-3.47122	0.33307	-1.58178	-0.501018	-2.32082	-4.3206	-2.48784	-2.05878	-1.90456	-2.96377	-4.93728	-3.42632	-2.72175	-0.664843	-1.61936	-1.70351	-1.90478	0.200674	-2.69287	-2.77886	-2.56989	-3.06174	-1.14019	-1.44194	-2.98194	-5.25733	-3.09074	-1.0305	-1.65288	-1.95625	0.264448	-0.127484	-2.85513
135	0.0459019	-2.68954	-2.24668	-0.524737	-1.61862	0.398299	0.550135	-1.28443	0.624543	-0.108155	-2.29184	-1.78121	-4.78788	-5.20042	-3.47288	-0.174577	-2.07614	-0.540607	-2.19283	-3.28777	-2.96595	-2.8057	-2.33735	-3.8195	-5.32632	-3.98164	-4.13875	-1.60517	-2.69697	-3.41486	-1.05735	-1.31722	-2.68264	-2.22903	-2.48341	-3.96565	0.259436	-2.02783	-4.19443	-4.99265	-4.15166	-0.603134	-2.13429	-2.04412	0.190595	-0.329887	-1.86759
136	0.226164	-0.208364	-1.44489	-1.9744	-0.345098	0.474209	0.274967	-0.768078	-0.0366977	0.00244243	-2.34622	-3.09577	-4.92479	-5.8961	-3.76544	0.646734	-2.75456	0.0618501	-2.17606	-3.32288	-3.04409	-3.21146	-2.76757	-3.02312	-3.76016	-4.15368	-3.75824	-1.28126	-4.51219	-2.41423	-0.859916	-0.372269	-2.42641	-2.91044	-3.05984	-3.41431	-0.594083	-1.89517	-2.62604	-4.95929	-3.56077	-1.52837	-1.84676	-1.48516	-0.270666	-0.927859	-1.35219
137	-0.525158	-0.187727	-2.22347	-1.98188	-1.01298	-0.255499	-0.188784	-1.9869	-0.813067	0.637684	-2.14374	-2.47212	-5.22438	-5.53817	-2.66064	0.340825	-1.30471	0.114174	-1.8751	-3.31938	-2.98915	-2.92436	-2.36014	-2.34514	-4.18344	-3.55859	-4.73961	-2.4485	-2.58785	-2.3723	-1.48285	0.199838	-2.92747	-3.60484	-3.58291	-3.588	-1.21612	-3.24818	-3.79603	-4.33534	-2.493	-2.44365	-1.90329	-2.56669	-1.55363	-1.53692	-2.39466
138	-1.03761	-0.579178	-2.14341	-2.40833	-1.8972	-1.27699	-1.44727	0.0325243	-0.157621	-0.983153	-2.08739	-2.33713	-5.06761	-5.43075	-3.61909	-0.0843537	-1.15909	-0.941822	-2.24516	-3.90511	-1.56484	-1.7905	-2.43754	-2.20823	-5.39902	-5.00022	-5.59064	-3.69206	-6.05459	-3.05027	-2.61951	0.26853	-3.40395	-2.45136	-3.53466	-2.98265	-0.89831	-2.60466	-3.01087	-5.24218	-3.35798	-1.69976	-2.11634	-2.40436	0.125945	0.0628073	-2.01523
139	0.0239759	-0.784345	-3.4941	-0.885578	-0.899975	-0.876429	-1.44755	0.243624	1.2008	-0.0161131	-2.33775	-2.12987	-5.06312	-5.28654	-4.80692	0.121464	-1.69129	-0.79947	-1.36203	-4.05242	-2.10882	-2.50461	-3.48689	-3.94624	-4.29395	-4.39038	-5.53946	-1.8303	-6.05916	-4.86549	-1.7193	1.20414	-3.81988	-3.34558	-4.19777	-3.38399	-0.285838	-1.86012	-2.25554	-3.72571	-4.48315	-2.39765	-2.24979	-3.56229	0.952411	-0.429692	-1.4229
140	-0.762293	-1.73232	-2.91065	-1.71303	-1.03278	-1.34268	-0.470372	-0.472743	-0.00858802	-0.992669	-1.25949	-2.78274	-4.31048	-5.98824	-3.15379	-0.583599	-1.71227	-0.540201	-1.62062	-4.37722	-2.39708	-2.78017	-4.06376	-4.03496	-4.21221	-4.79542	-5.09609	-1.27233	-2.42516	-3.93268	-2.36962	0.52879	-2.49374	-4.4246	-4.6915	-3.83926	-0.661698	-2.61555	-3.48417	-5.37941	-3.5836	-2.29848	-2.13583	-1.67582	-0.71371	-0.964116	-1.25189
141	-1.21926	-1.42025	-3.16744	-2.47402	-1.96237	-1.53176	-0.624351	0.282314	-0.404543	-1.63314	-1.69584	-2.89397	-5.85937	-4.9018	-4.28428	0.263582	-2.3884	-0.774151	-2.10582	-3.61953	-1.67961	-2.02082	-3.74371	-3.5274	-4.50955	-3.41789	-3.6574	-2.41499	-4.44795	-2.90585	-2.49628	-0.718132	-2.98795	-2.78689	-3.1145	-4.12809	-1.69665	-1.95331	-4.03109	-4.93455	-4.78163	-2.513	-1.75348	-2.08959	0.32456	-0.0584282	-1.92557
142	-1.78384	-2.2285	-2.68235	-2.26243	-2.20706	-1.48091	-0.287179	-0.640483	0.84	-0.633751	-2.19542	-0.919911	-5.56409	-5.41443	-2.96849	-0.0834458	-1.32115	-0.228948	-1.05161	-3.31073	-2.84764	-2.16452	-3.07067	-1.99064	-5.03838	-4.93397	-5.36342	-1.95822	-2.0519	-2.20611	-1.57928	-1.22049	-3.49481	-3.69238	-2.8281	-3.71198	-0.969157	-1.9751	-4.29844	-5.60585	-3.0706	-1.8428	-2.49826	-1.41703	-0.132868	-0.696061	-1.3734
143	-1.34239	-3.26377	-2.72068	-2.46428	-1.81253	-2.04153	-2.17139	-1.14517	-0.515657	-0.605166	-2.65076	-3.17606	-4.84152	-4.76372	-4.48053	0.0154723	-2.59006	-0.458512	-1.81716	-3.23809	-2.31714	-1.45565	-2.54413	-2.02078	-4.6265	-3.83648	-4.58314	-1.6334	-2.75619	-2.80422	-1.86685	0.0179498	-2.68983	-2.2484	-4.32981	-4.41363	-0.828105	-2.53473	-4.17034	-6.2324	-5.71628	-3.01217	-1.41662	-1.92614	-0.453415	-0.439268	-1.89003
144	-2.56036	-2.41075	-3.57383	-2.81476	-1.90523	-1.41989	-1.07189	-1.6719	1.07479	-0.0988842	-3.56824	-4.00935	-5.77771	-5.87492	-3.63132	-0.461436	-2.43325	-0.00563799	-1.79853	-3.10413	-2.88086	-3.20486	-2.96823	-2.72497	-4.39751	-3.73203	-3.42363	-2.69048	-3.17738	-4.77283	-2.1169	-1.01578	-2.98865	-3.86127	-3.63431	-4.76037	-0.533856	-3.24887	-4.03177	-4.56084	-3.89711	-2.93001	-1.73117	-1.68558	0.377229	-0.645661	-1.13574
145	-2.74875	-3.29395	-3.9957	-2.85123	-3.95081	-2.71124	-0.834319	-1.58064	1.44303	-0.518141	-2.25493	-2.36951	-5.49624	-5.23462	-4.18347	0.35414	-2.79469	-0.549532	-2.01985	-2.58406	-2.80794	-2.57165	-3.45768	-2.80795	-4.42441	-3.50287	-4.59809	-2.77946	-1.64491	-5.0814	-1.7744	-0.0138747	-3.56509	-3.25357	-3.59171	-5.63751	-0.312507	-3.2053	-3.97892	-6.93795	-4.2377	-4.46088	-2.7252	-2.24575	-0.232733	-0.852374	-1.96883
146	-2.57329	-2.17263	-3.87039	-2.71342	-1.81326	-0.365702	-1.69149	-0.0454055	2.22644	-0.475701	-2.3559	-2.35391	-4.77208	-4.89152	-4.5425	-0.338491	-3.48147	-0.598898	-2.43807	-3.23468	-1.97796	-3.85507	-1.86059	-2.91	-3.73175	-3.27877	-3.65713	-1.13236	-5.01211	-2.12362	-0.57953	0.151207	-2.38206	-4.28711	-5.58542	-4.60716	-0.487039	-1.33699	-3.48302	-4.58087	-4.90592	-3.11978	-2.34926	-2.05841	-0.377451	-1.01381	-2.40776
147	-1.85499	-4.55634	-3.26996	-2.71825	-2.05615	-0.739225	-1.21881	-1.21634	1.83722	-1.51706	-1.4362	-1.94603	-5.36456	-5.58239	-4.38707	0.0858307	-2.22371	-0.374264	-1.8521	-3.13167	-2.92863	-3.14161	-2.36978	-2.79872	-4.39056	-3.58437	-4.68671	-1.1468	-3.67105	-4.61934	-2.31576	-1.98347	-3.0711	-3.5979	-3.94703	-4.01442	-0.556382	-2.62504	-3.99794	-4.58885	-4.96239	-3.16765	-2.14112	-1.8634	-1.56033	-1.1224	-2.05856
148	-1.62752	-4.99293	-4.83875	-2.5814	-2.43124	-2.06127	-0.993258	-0.209216	0.360278	0.570792	-2.955	-2.9932	-5.40927	-5.05354	-3.97506	-0.201312	-2.3333	-1.0089	-1.96684	-3.9161	-1.69726	-2.49202	-3.44802	-3.42509	-4.35741	-4.44961	-4.73556	-3.3211	-3.31139	-2.51721	-1.4756	-0.593621	-2.65497	-4.03577	-4.80244	-4.82305	-0.911048	-2.17743	-2.9608	-5.05345	-5.99039	-3.7539	-3.06201	-2.38133	-0.520755	-1.22225	-1.33395
149	-2.3518	-2.94676	-3.25176	-4.083	-2.50393	-1.22645	-0.597416	-0.779636	0.897467	-0.481125	-3.1887	-2.05794	-5.8938	-5.64892	-4.08339	-1.2734	-2.33314	-0.789688	-1.81668	-4.20578	-2.648	-2.9264	-3.89973	-3.28327	-4.75507	-4.27431	-4.584	-1.96556	-2.23667	-3.98099	-0.630171	-1.19186	-3.71711	-3.59045	-4.15888	-4.33064	-1.90962	-2.32702	-3.35093	-5.85854	-3.43086	-4.67243	-2.30836	-2.01676	-1.16297	0.207285	-1.98743
150	-1.51359	-5.60742	-3.03484	-3.66285	-1.77734	-0.957534	-1.85068	0.24802	-0.228811	-0.547353	-2.01893	-3.48456	-5.4191	-5.8818	-4.41615	0.889775	-2.33737	-0.637921	-1.57963	-3.62256	-2.50345	-2.21104	-3.21214	-3.60688	-5.95116	-4.68841	-5.29692	-2.04008	-3.5644	-3.16757	-1.37305	-0.960586	-2.97469	-3.40667	-4.59816	-5.43487	-1.81242	-0.827679	-4.55451	-4.88703	-4.34652	-4.41577	-2.22175	-2.77651	-0.986341	-0.445635	-2.77292
151	-1.74914	-3.16449	-4.28897	-3.22064	-3.39569	-2.59543	-2.03391	0.245227	1.73277	0.263732	-2.83793	-2.76483	-5.59054	-5.73074	-4.2542	0.277237	-1.53197	-0.533223	-1.97915	-2.72576	-2.49088	-3.20405	-2.97593	-4.05849	-4.24683	-4.01928	-4.78693	-2.22763	-3.39026	-1.92916	-3.57116	-2.22854	-3.68734	-3.38021	-4.70311	-5.97259	-3.72578	-2.26252	-6.0473	-6.02859	-4.23081	-3.33529	-1.63907	-2.12101	-0.307028	-0.281224	-2.89856
152	-2.60864	-4.55792	-4.23208	-3.38767	-2.39161	-3.60408	-0.989036	-0.453053	-0.930801	-0.253739	-2.76097	-2.56341	-5.41123	-4.9631	-3.87121	-0.855804	-1.93483	-0.582816	-1.84616	-4.04438	-3.29954	-3.04285	-2.1802	-2.51867	-5.60678	-4.93972	-4.56183	-0.290468	-2.59752	-3.34881	-1.54473	-2.16461	-2.52187	-4.53431	-4.61438	-4.78493	-2.07376	-3.77511	-5.65345	-5.44805	-5.56281	-4.20425	-2.3495	-2.16588	-0.311478	-0.46012	-3.20988
153	-2.53283	-3.21524	-5.0912	-3.49775	-2.35387	-0.797787	-1.3565	-0.608737	0.363872	-0.672288	-2.9976	-3.94674	-5.36089	-4.87405	-4.33374	0.191634	-1.56337	-0.184968	-2.29503	-3.31923	-3.03469	-3.64063	-3.32185	-2.03746	-5.25039	-4.12552	-4.16318	-2.10998	-2.92146	-3.62209	-2.72479	-0.0867764	-3.86577	-2.49552	-4.83567	-4.88489	-2.34399	-2.89664	-5.14402	-6.99883	-3.80045	-3.54004	-2.11591	-2.66969	-0.282601	-1.25969	-0.750319
154	-2.56764	-3.83561	-4.52839	-2.16756	-2.80881	-0.756957	-1.07281	0.360562	-0.745695	-1.28953	-3.09739	-2.40019	-5.71985	-4.97933	-3.47508	-0.52073	-1.89738	-1.19829	-2.22951	-4.0818	-3.23059	-4.30383	-3.56505	-4.05909	-4.53238	-4.6741	-4.82379	-2.30166	-2.31313	-3.26544	-1.30669	-2.37366	-3.05087	-2.17276	-6.41319	-5.57023	-1.48648	-2.116	-3.38821	-4.69603	-4.17385	-4.06128	-2.33912	-1.94803	-1.49899	-0.114171	-1.35272
155	-3.17019	-2.62053	-3.61618	-2.66312	-1.62395	-1.56215	-0.63007	-1.28174	-1.5894	-0.732936	-1.50475	-2.28101	-4.6939	-5.61539	-4.22662	-0.694848	-1.76289	-0.671201	-3.70247	-3.65528	-3.00428	-2.22643	-3.53874	-2.80542	-5.32156	-5.42907	-4.81561	-1.87647	-3.02771	-4.21374	-1.49947	-0.781318	-4.13866	-3.41508	-6.30439	-5.27126	-1.88071	-2.02595	-4.00409	-5.61761	-3.74456	-4.08822	-1.79395	-1.79498	-0.567667	-1.21542	-2.23428
156	-2.95027	-3.96168	-3.39937	-4.00002	-2.30276	-1.9774	-1.90286	-1.71555	0.842088	-0.869827	-2.63719	-2.70439	-4.93116	-5.41572	-4.29937	-0.236633	-2.07048	-0.544937	-1.40703	-3.79154	-2.14715	-2.76249	-3.04377	-4.13911	-4.76977	-5.03283	-4.76699	-2.98298	-2.81616	-4.00058	-2.61891	-2.17125	-3.41307	-3.86036	-7.74231	-5.45282	-2.96087	-1.63206	-4.62032	-5.19265	-3.4902	-5.09912	-1.53029	-2.21613	-1.74004	-0.310281	-1.01474
157	-1.69022	-3.46378	-5.06004	-4.31852	-2.83653	-1.49004	-0.90514	-1.00057	0.027678	-0.566381	-2.78946	-4.01381	-5.84855	-5.81889	-4.45584	0.224859	-1.26646	-1.42647	-2.42293	-3.61411	-2.44944	-2.83845	-4.06498	-2.87604	-5.25711	-4.72187	-5.50224	-2.14262	-2.74855	-2.72515	-3.20656	-1.60424	-3.18985	-3.29857	-5.44944	-4.98565	-1.34611	-2.15358	-6.24112	-5.99507	-3.56746	-5.72865	-1.71384	-3.54037	0.124879	-0.880106	-1.48613
158	-2.70419	-2.94029	-4.58111	-2.77903	-2.49351	-1.38417	-0.621001	-0.676207	0.365505	0.119765	-1.95288	-2.03858	-6.21287	-5.22627	-3.80532	0.660881	-1.2481	-0.897084	-2.3651	-3.73619	-2.6882	-3.58146	-2.1769	-3.53362	-5.23344	-4.50541	-5.5663	-2.08679	-6.04319	-4.02576	-1.95827	-0.87096	-3.27926	-2.26305	-6.18508	-5.33202	-1.63524	-1.40717	-4.19573	-5.19857	-4.90073	-5.38241	-1.8852	-2.22065	0.355142	-0.691202	-1.62334
159	-3.01897	-3.44719	-4.49577	-3.89727	-2.94752	-2.10095	0.280656	-0.0743818	0.699569	0.334622	-2.35111	-3.07952	-5.16194	-6.04217	-4.44412	0.0676742	-1.63613	-0.336947	-1.97368	-3.68689	-2.14093	-3.06393	-3.39248	-4.73221	-4.83291	-4.19565	-2.72751	-2.01336	-2.13099	-5.81769	-1.86771	-1.23909	-3.73143	-3.03965	-5.42065	-4.7361	-3.18296	-2.80187	-4.38554	-4.59842	-5.55437	-6.21737	-1.82992	-2.66269	0.0499836	-0.281724	-3.70124
160	-2.38969	-3.01227	-5.03873	-2.84236	-2.22588	-1.80293	-2.07183	0.36693	0.131186	-0.0996412	-3.40302	-2.56266	-6.05446	-5.05234	-3.73886	-0.147352	-1.82037	-0.739152	-3.14271	-3.66194	-2.32537	-2.99457	-2.71176	-3.65461	-4.42167	-4.31966	-4.37141	-4.26685	-0.62642	-3.80377	-1.66978	-0.636245	-3.37551	-2.64516	-6.5155	-5.35778	-2.55628	-2.29488	-5.7123	-4.74006	-5.20322	-6.31762	-1.84413	-2.58029	0.128995	-0.719066	-1.2939
161	-3.46875	-3.97403	-4.67385	-3.52211	-2.60959	-2.60588	-1.14892	-0.62149	0.522794	-1.33167	-1.82376	-2.26253	-5.49205	-5.71621	-4.65111	0.165873	-1.65384	-1.17804	-2.84905	-3.9276	-2.10826	-3.9003	-1.94223	-2.73069	-4.44466	-4.47534	-3.81871	-1.5576	-4.39197	-2.90636	-3.35913	-2.1361	-2.46366	-2.39095	-4.34069	-5.02665	-3.05488	-1.3185	-4.81967	-4.46485	-3.69535	-5.24109	-2.00711	-2.67256	-1.69422	-0.648671	-2.19349
162	-3.79434	-3.48851	-4.95401	-3.38598	-2.71921	-1.62359	-1.13778	-2.09431	0.493551	-0.737183	-1.6669	-3.0072	-5.09325	-5.66091	-4.10714	-0.917551	-2.04542	-0.453312	-1.71715	-3.67804	-2.37254	-4.24203	-2.56015	-3.50574	-4.02782	-4.66458	-5.10447	-3.35644	-2.35215	-2.7715	-3.0801	-2.38611	-3.61985	-2.94604	-4.44532	-5.11431	-2.01737	-1.87754	-3.66992	-6.05549	-2.80692	-5.33933	-2.61186	-1.93016	-0.343415	-0.792526	-1.73612
163	-1.98674	-3.76351	-4.40676	-2.61799	-3.26404	-1.21724	-1.57044	0.00250502	-0.657693	0.293895	-2.1246	-2.3149	-5.68142	-5.71319	-4.55643	-0.417925	-1.16807	-1.3524	-2.82727	-3.27681	-2.36929	-2.45734	-3.3394	-4.11296	-5.02528	-6.01591	-4.29695	-2.74945	-3.01974	-3.45046	-3.46164	-0.87185	-2.80155	-0.802252	-4.67813	-4.94442	-2.80824	-2.03382	-4.31696	-6.50727	-3.34872	-5.63324	-2.05538	-2.508	-0.51326	-0.497712	-1.85827
164	-2.3538	-3.28694	-4.21544	-3.64284	-2.28131	-1.7466	-1.16452	-1.76867	-0.189463	0.0760902	-3.81063	-2.36951	-5.67327	-5.26531	-3.52967	-0.135008	-1.91637	-0.473854	-2.67256	-4.03025	-1.18101	-1.91874	-2.50202	-4.05581	-4.58938	-3.44499	-4.74649	-1.6357	-5.35649	-4.03845	-2.1258	-1.85103	-3.54076	-1.30843	-3.63411	-4.34173	-2.00183	-2.11856	-3.71865	-5.40927	-4.04701	-5.26726	-2.05957	-2.3137	0.205931	-0.311729	-2.72618
165	-2.96851	-4.46209	-3.47101	-4.84624	-1.51485	-1.49506	-0.0594976	0.112761	1.03064	-1.26757	-2.82698	-3.47163	-5.60898	-5.51363	-4.45457	-0.938563	-2.24818	-1.34702	-2.35342	-3.93076	-1.96527	-2.68194	-3.01665	-4.32089	-3.66012	-3.70154	-4.10717	-1.64006	-3.5891	-2.62384	-3.13248	-2.20206	-3.34593	-2.94881	-5.05593	-4.84914	-2.14148	-1.62884	-5.48436	-7.19692	-6.64657	-5.32008	-2.30103	-2.00695	-0.364335	-0.773172	-1.68554
166	-2.41069	-3.44755	-4.56135	-3.68063	-2.60004	-2.29606	-1.2832	0.0381846	-0.371063	-0.665914	-3.0995	-1.39331	-5.60972	-6.02238	-4.10457	-0.00900664	-2.04461	-0.110014	-2.00942	-3.4095	-2.44989	-2.98963	-1.64787	-3.96492	-5.58319	-4.94095	-5.0079	-0.826174	-2.6974	-4.46404	-1.23112	-2.1716	-2.99243	-3.58605	-3.31739	-4.72127	-1.77781	-1.38039	-3.93885	-5.40237	-5.29704	-6.17406	-1.96401	-2.57597	-0.645028	0.0443712	-1.90654
167	-2.85504	-3.82738	-4.08076	-3.56623	-2.7066	-1.68911	-1.33787	-1.64232	-0.174628	-0.553062	-3.23658	-2.5353	-5.23688	-5.14659	-3.60523	-0.230997	-1.44003	-1.12483	-2.59142	-3.40446	-1.3501	-2.823	-3.33711	-3.60807	-3.80152	-5.53402	-4.84447	-3.84246	-4.563	-2.2777	-3.37784	-1.77462	-2.73498	-1.98834	-3.9442	-5.63674	-1.88051	-2.09117	-2.85686	-3.9686	-4.28221	-5.68997	-2.02964	-1.62455	-1.26744	0.0626576	-1.91521
168	-4.01775	-3.89408	-4.84273	-3.1023	-4.14775	-1.90646	-0.90683	0.0605247	-0.819306	0.0982611	-2.0392	-2.43215	-5.32118	-5.14504	-4.70727	-0.0348756	-1.39797	-1.31114	-2.21538	-4.23756	-2.52998	-2.39986	-4.12768	-3.41062	-4.28177	-4.06513	-4.10323	-3.41818	-3.46037	-2.41651	-2.04362	-2.64433	-3.8097	-3.40662	-4.73552	-5.03392	-2.22664	-1.3041	-3.8471	-5.05697	-4.1563	-6.45975	-2.14974	-1.98009	-0.248719	0.650531	-2.23659
169	-3.97608	-4.04556	-5.19895	-2.90898	-2.61646	-1.9384	-0.385931	-1.59556	1.06804	-0.467424	-2.99261	-2.68369	-5.54916	-5.17316	-4.56193	0.696716	-2.35894	-0.569139	-2.12386	-3.45974	-2.218	-2.91837	-4.08941	-3.96779	-4.61435	-3.36266	-4.68343	-2.20899	-5.97546	-2.47652	-1.05325	-1.19965	-3.39111	-2.08883	-4.00284	-4.61569	-3.3953	-1.24244	-4.33208	-6.48414	-3.71142	-5.8299	-2.21629	-2.45907	-0.347087	-0.456454	-2.52253
170	-2.69678	-4.4526	-5.00417	-4.70852	-3.73258	-2.88596	-2.25906	-1.84546	0.132791	-0.585205	-2.53022	-1.71611	-5.02543	-5.44839	-3.60267	-0.250455	-2.04293	-0.0304366	-2.02099	-4.57601	-2.53318	-2.76351	-3.93671	-4.53328	-4.19219	-3.67189	-3.7218	-2.06843	-2.58457	-2.10284	-3.03632	-1.52627	-2.90908	-2.43178	-2.32431	-4.08011	-2.67952	-2.70382	-4.22141	-5.71732	-4.31216	-5.31376	-1.38016	-1.80681	-0.354668	-0.443612	-3.56153
171	-3.45785	-5.09782	-3.74974	-2.94015	-3.37233	-2.4187	-3.32264	0.592103	-1.04045	-1.37168	-1.83084	-3.23199	-5.44121	-5.05675	-3.83006	0.162923	-2.36428	-1.06565	-3.01406	-2.90193	-1.97697	-1.9848	-2.83244	-2.99004	-4.21786	-4.20843	-4.19145	-1.91306	-2.20366	-3.72348	-1.73962	-1.52708	-3.10869	-2.82399	-3.68304	-3.89153	-1.40022	-0.876941	-4.27964	-5.13138	-4.1567	-6.83271	-2.32969	-1.95423	-0.16101	-0.0516475	-2.39781
172	-3.99858	-5.36349	-4.1534	-3.87319	-2.70914	-2.15316	-0.626522	-1.5512	-1.25145	-0.248252	-2.57273	-3.68914	-5.74026	-5.44826	-4.98995	-0.351112	-1.5109	0.370577	-2.15889	-4.36461	-2.71595	-2.10625	-3.50115	-4.44646	-3.51291	-3.59619	-5.33593	-3.51774	-3.44717	-2.08288	-1.69851	-1.4979	-3.42065	-3.67652	-3.80171	-5.73936	-3.51926	-1.72764	-4.09653	-4.76814	-5.88739	-6.07511	-2.21682	-2.04693	-1.3747	-0.854949	-2.22915
173	-3.35906	-3.9052	-5.87117	-3.89592	-2.66219	-2.44179	-2.81808	1.30531	-0.0105537	-0.279281	-2.2337	-2.38373	-5.83062	-5.42171	-4.89321	0.165084	-1.50159	-0.102037	-2.15982	-3.22281	-1.94636	-2.40482	-3.28895	-4.5824	-4.46955	-4.52879	-4.79954	-1.68608	-2.96919	-1.47337	-2.52394	-1.67606	-3.01693	-2.85967	-3.313	-5.31918	-3.19604	-2.31585	-4.92798	-4.48141	-3.95493	-6.69367	-2.65895	-2.23837	-2.10859	0.301276	-1.9374
174	-3.20591	-3.14813	-4.91823	-4.81489	-2.91627	-1.86218	-1.33234	-0.690842	0.803204	-0.160751	-2.07788	-2.31249	-5.93543	-6.03856	-4.35698	-0.638108	-2.03517	-0.836808	-1.82998	-3.4327	-2.02379	-3.5492	-2.26809	-2.76863	-3.82458	-3.57306	-5.1852	-1.3736	-3.98202	-4.30896	-3.20758	-2.01886	-3.1684	-4.649	-3.97393	-6.85196	-3.60365	-2.62033	-4.57876	-5.08554	-4.188	-6.2436	-1.89447	-1.77138	0.359876	-1.0848	-2.52206
175	-3.80697	-4.01361	-4.83804	-4.30377	-2.38447	-2.76966	-1.75942	-0.227276	-1.30584	-0.227535	-3.12707	-2.61236	-5.59514	-5.51316	-3.72243	0.0688663	-2.20793	-1.03514	-2.12743	-4.45917	-2.01643	-1.97908	-4.46002	-3.59222	-3.47669	-4.22039	-4.25239	-1.26973	-2.80219	-1.7005	-2.50368	-2.14998	-3.39319	-3.44902	-2.98048	-4.97051	-3.5918	-2.00421	-3.77357	-5.42699	-5.23455	-5.08474	-2.2345	-2.28458	-0.861336	-1.34124	-1.33506
176	-4.26136	-4.76599	-4.66532	-3.759	-2.36791	-2.17093	-2.59116	-2.8739	-0.408194	-1.01865	-1.46195	-2.9777	-5.92059	-5.02578	-3.90867	0.0052902	-1.94079	-0.328434	-2.64522	-2.8829	-1.36708	-3.63462	-3.76887	-4.47133	-4.67966	-3.47688	-6.17154	-2.36227	-3.58538	-3.69566	-3.55464	-1.16629	-3.89886	-3.46407	-2.57516	-5.57615	-2.34075	-1.20142	-6.30203	-5.23311	-4.49105	-5.41895	-1.71939	-1.64511	-1.07177	-0.577482	-2.1141
177	-3.51119	-4.91193	-5.02841	-4.01047	-2.95642	-2.84267	-1.33521	0.0669326	0.607967	0.154824	-3.43206	-2.02584	-5.41511	-5.3757	-3.73936	0.370221	-1.67508	-0.206568	-2.21989	-3.25208	-2.53951	-3.09053	-3.543	-3.94893	-3.72465	-4.23655	-3.28084	-0.885512	-4.01615	-3.00378	-3.47443	-1.87101	-2.8262	-3.59633	-3.13811	-4.51412	-1.31875	-0.82318	-2.74744	-4.00405	-3.87954	-6.64868	-1.61582	-1.39269	-0.262436	-0.0879231	-2.86971
178	-4.0111	-4.23937	-4.35579	-3.81739	-2.53111	-2.61112	-1.13863	-2.32515	0.683399	-1.12893	-1.62788	-3.62608	-5.28184	-5.26154	-3.94364	-0.134098	-1.65755	-0.64461	-1.95637	-3.84586	-1.6474	-3.27041	-3.36109	-2.66647	-3.8118	-4.00679	-5.04148	-3.50473	-5.70498	-2.12842	-2.9898	-1.56852	-2.68034	-3.51716	-2.6523	-4.73225	-1.69813	-1.76911	-4.27763	-6.98721	-4.39665	-6.92101	-2.37002	-1.8094	0.380976	0.266402	-2.02328
179	-2.866	-3.87477	-6.04427	-3.10703	-2.83807	-2.43336	-1.62263	-1.09497	-0.110593	0.284327	-2.037	-2.44337	-5.77708	-5.29777	-3.9359	-0.0293402	-1.38729	-0.487958	-2.67257	-3.05167	-2.58705	-3.25506	-2.81068	-2.49636	-4.3929	-3.94391	-3.75345	-1.6868	-2.90603	-1.78429	-1.46125	-1.99016	-3.48158	-4.36983	-2.50643	-5.68153	-2.48417	-1.87396	-5.04213	-5.89069	-3.81043	-5.00882	-1.86865	-2.9146	-0.637989	0.628529	-0.84333
180	-4.42032	-3.96477	-5.3627	-2.8912	-2.91612	-1.55809	-0.327604	-2.20506	0.542397	-0.983344	-3.01648	-2.82363	-5.53374	-4.88987	-3.70878	-0.0800037	-1.01666	-0.555743	-2.77582	-2.97673	-2.20408	-1.82735	-3.71752	-2.03415	-4.02625	-3.42606	-4.49977	-1.33272	-2.74506	-3.25901	-1.33021	-2.87296	-2.57112	-4.7536	-3.602	-3.83264	-2.3922	-1.91825	-4.19813	-4.53967	-5.55057	-5.76157	-1.98179	-1.34722	-0.16384	0.534858	-2.15404
181	-3.78569	-4.43331	-5.07721	-4.63342	-3.73597	-2.85941	-0.969211	0.147345	0.562694	-1.00761	-2.47524	-2.75314	-4.93631	-5.07593	-4.4614	-0.577692	-2.85774	-0.101789	-3.16262	-3.64118	-1.93869	-1.57348	-2.9978	-2.30505	-3.8934	-5.72457	-4.88985	-1.92197	-1.8054	-2.66004	-2.37252	-1.942	-3.81408	-4.49934	-3.91435	-5.55746	-3.46934	-1.33612	-3.0108	-5.2522	-4.62874	-6.0365	-1.79896	-1.41365	-1.0759	-0.414408	-1.30705
182	-3.35889	-5.35429	-4.01239	-4.74386	-2.97354	-2.29099	-0.847929	0.333427	-1.46391	-2.00426	-1.75494	-2.60274	-4.76172	-4.48272	-4.42012	-0.678659	-1.50493	-0.147266	-1.79177	-1.93497	-1.95191	-1.71519	-2.79294	-4.03322	-3.17824	-4.24362	-4.70864	-1.18894	-3.78844	-1.36598	-2.85149	-1.64413	-4.07702	-5.57465	-2.44915	-5.21109	-1.98878	-3.43122	-3.65435	-4.74582	-5.24307	-6.68621	-1.96217	-1.56955	0.289179	-0.542126	-1.38621
183	-3.16718	-4.42242	-4.77993	-4.3313	-3.5901	-2.33854	-3.23596	-2.33276	-0.363554	1.05731	-2.99731	-2.48563	-5.72349	-4.96779	-3.71164	-0.713652	-1.83744	-0.602925	-1.6757	-3.70527	-2.51705	-3.99283	-2.83835	-3.46535	-2.84472	-4.20993	-4.41834	-1.7096	-2.64994	-2.13428	-2.13377	-3.15675	-3.03755	-6.60672	-3.46861	-4.76884	-3.06234	-1.56633	-3.21527	-4.81709	-4.67716	-6.84864	-2.04635	-1.94454	-1.821	-1.20843	-1.49991
184	-4.44578	-4.49534	-3.96146	-4.08135	-2.97025	-2.90557	-2.69188	-1.73452	0.0978133	-0.61805	-2.32956	-1.23384	-5.74748	-5.2445	-4.1608	-0.893619	-0.806323	-1.38159	-1.91479	-3.1379	-1.78058	-2.60656	-3.53429	-3.92841	-4.8036	-4.17773	-4.89612	-1.6863	-2.66293	-2.18748	-1.63471	-2.00033	-2.7719	-5.04335	-2.69437	-4.54781	-2.41148	-2.22076	-3.79737	-6.81473	-2.82607	-6.44599	-2.01805	-2.06709	0.403299	0.374954	-1.52931
185	-2.83766	-3.90416	-5.8062	-4.51257	-2.90474	-3.10588	-2.09904	-0.15493	0.0452433	-0.970307	-1.51513	-2.34205	-4.88689	-6.33871	-3.77805	-0.0521598	-0.976537	-0.650461	-2.96507	-3.54455	-2.01012	-2.54557	-3.3129	-3.68137	-3.91154	-3.83822	-5.63815	-5.15395	-4.65608	-1.77543	-2.24525	-1.72596	-3.53632	-4.6554	-1.63327	-5.6191	-2.36752	-1.45227	-4.21781	-6.21928	-5.72406	-6.05137	-1.44947	-1.57523	1.19033	-1.40303	-1.49313
186	-3.08074	-5.58492	-4.38023	-4.18473	-2.7964	-3.00635	-0.958147	-1.56797	0.161178	-0.698646	-1.54127	-2.91192	-5.24573	-4.48554	-3.6778	-0.56438	-1.86882	-0.738045	-2.24797	-4.77969	-1.56639	-3.24251	-3.75185	-3.00357	-3.9275	-3.34668	-4.34019	-2.40619	-1.93043	-2.2995	-1.91208	-2.21366	-4.06614	-3.72083	-2.8635	-6.01344	-2.07667	-2.1615	-3.92984	-3.91647	-3.53977	-5.94377	-1.49268	-1.57463	-0.102014	-1.24337	-1.89071
187	-3.95248	-4.78026	-4.10809	-4.44761	-3.34379	-1.55881	-0.948854	-2.04662	-0.128334	-2.10859	-2.95428	-2.73307	-5.78513	-4.98316	-4.83073	-0.883929	-1.43363	-0.484693	-3.60401	-3.74476	-1.3591	-2.16801	-3.14946	-3.87509	-3.442	-2.9741	-4.06486	-1.5225	-3.47418	-1.81761	-2.74445	-2.57783	-2.61303	-4.74491	-2.12646	-5.61055	-0.237031	-2.25328	-3.77499	-4.63368	-4.60028	-6.08259	-1.50749	-2.37222	-0.251765	0.9407	-1.88133
188	-4.79229	-5.15744	-5.02782	-4.33496	-3.18669	-1.79693	-1.56229	-0.454293	0.774191	-0.953942	-2.64813	-2.38843	-5.29636	-4.09269	-3.90297	0.0785182	-1.58248	-1.11658	-1.88915	-3.94537	-1.7135	-2.87048	-3.00446	-3.68987	-3.1055	-4.0014	-3.01044	-2.46837	-3.42471	-2.2614	-2.56143	-0.204278	-3.6988	-3.33907	-3.45379	-4.66615	-3.02049	-1.24051	-5.19546	-4.7752	-4.33767	-7.38436	-1.08139	-1.83647	-0.33356	-1.04611	-1.95358
189	-4.14981	-3.99825	-4.67942	-4.61685	-3.10273	-1.76001	-0.340433	-0.738617	-1.0667	-0.985152	-1.64695	-2.35156	-5.64606	-3.90659	-4.51421	0.243021	-1.60505	-1.79178	-2.78787	-2.63141	-1.79342	-2.65947	-2.64686	-3.87668	-5.02114	-2.97489	-4.43321	-0.369065	-3.13687	-1.51316	-1.72125	-2.08147	-2.0522	-3.55653	-2.8449	-4.27303	-2.95813	-2.38015	-5.16382	-5.64232	-4.35095	-5.94517	-2.46739	-2.27071	-1.18878	0.293636	-1.43232
190	-3.45938	-4.0763	-5.37851	-3.94893	-2.16631	-2.6436	-0.288708	-0.615794	-0.75728	-0.91847	-2.00369	-2.63096	-5.57475	-4.79503	-4.10969	-0.521759	-1.11515	-0.342998	-1.82913	-3.68854	-1.61725	-1.95029	-2.38207	-2.51188	-3.74916	-3.90051	-4.48693	-2.15148	-3.5297	-2.84738	-1.55457	-2.6952	-3.14467	-2.46534	-3.0072	-5.02939	-1.23339	-1.72857	-3.12122	-3.79749	-5.35188	-7.53192	-1.87997	-1.87544	-0.911801	-0.543322	-1.26378
191	-3.84676	-3.672	-4.9505	-4.01467	-2.37291	-2.12356	-0.859311	-0.606764	-1.44295	-0.142475	-1.67618	-2.0092	-4.43041	-5.44186	-3.43332	-0.290486	-1.45247	-0.595807	-2.28584	-2.64122	-1.56224	-3.03812	-3.2765	-3.31693	-5.21615	-3.4336	-4.16228	-2.51013	-5.09419	-3.32687	-1.52169	-2.85488	-3.62942	-4.65353	-3.47737	-5.14069	-1.20825	-3.84749	-2.86174	-3.25368	-4.3892	-5.90382	-1.79213	-1.97466	0.206087	0.0834146	-1.16671
192	-3.85308	-3.73181	-4.27315	-5.54793	-2.92358	-2.5154	-1.63524	-2.47766	0.4971	-0.245908	-2.70045	-2.24531	-5.9705	-5.36481	-2.91859	-0.606446	-1.80112	-0.481237	-1.97275	-3.53006	-2.0712	-2.48092	-2.55779	-3.91178	-3.88411	-2.94968	-3.87799	-0.907236	-3.69322	-2.64914	-2.29577	-2.634	-2.98472	-2.84235	-2.61763	-4.8032	-2.16889	-2.70301	-3.34331	-3.47445	-3.9931	-5.8365	-1.79129	-2.0061	-1.32175	-0.506482	-0.478757
193	-4.09021	-4.65653	-4.42278	-3.4121	-2.9106	-1.78312	-0.534417	0.59382	0.138081	-1.39926	-2.27	0.564003	-5.9968	-5.09387	-3.24798	-0.575858	-1.51749	-0.220086	-2.64229	-4.16835	-1.33124	-1.93567	-4.76542	-3.04455	-4.64742	-3.59496	-3.58144	-1.50445	-3.7934	-2.88081	-2.91734	-1.14505	-4.62474	-3.92017	-3.65406	-5.76428	-0.47888	-2.94518	-4.94375	-3.92454	-4.69823	-5.45617	-1.48068	-2.26265	-0.698491	0.184249	-1.94977
194	-4.47121	-3.66901	-4.00039	-3.6662	-2.34503	-2.40128	0.0748858	0.21142	-0.487627	0.262401	-2.51251	-1.74079	-4.99805	-4.99132	-3.99749	-0.670096	-1.31717	-1.34804	-2.40564	-3.79714	-1.99321	-2.11324	-2.20548	-4.40095	-3.24572	-2.62448	-3.88906	-2.1919	-3.96107	-2.1998	-3.09532	-1.21645	-3.71698	-3.37262	-2.35812	-6.67076	-1.18851	-0.377017	-4.21249	-4.87427	-3.47795	-5.92018	-1.89796	-1.88084	-1.35383	-0.154725	-1.82008
195	-3.89085	-3.49684	-4.90269	-4.0966	-2.91511	-2.17394	-1.3138	-1.27413	0.446991	-1.16215	-2.04498	-2.83223	-5.53562	-4.44058	-3.99155	0.604368	-1.58243	-0.855032	-2.03265	-2.88958	-1.44022	-3.41292	-1.91771	-3.46113	-2.42343	-3.10073	-2.85226	-2.02719	-1.69512	-1.91208	-1.89004	-1.72596	-3.74371	-1.82468	-3.86849	-4.93683	-2.75568	-1.73633	-2.74133	-4.04318	-4.27503	-5.83768	-1.34141	-1.82537	-0.134349	0.0927913	-1.55669
196	-4.29679	-3.66232	-5.2525	-4.40735	-2.5881	-2.22924	-2.18873	-0.869435	-0.863058	-1.11475	-1.7602	-1.58229	-5.10696	-4.5253	-2.91909	-0.181066	-1.61222	0.404547	-3.28368	-2.41728	-1.59153	-2.78163	-2.07679	-3.46944	-3.3934	-2.63707	-4.04115	-1.31551	-3.61058	-2.21539	-1.59493	-2.03381	-2.35401	-3.11637	-2.74456	-4.00582	-0.414503	-2.36406	-4.06544	-5.34691	-4.32181	-5.71877	-2.55562	-1.17812	-0.733775	-0.365502	-2.90912
197	-5.49728	-5.37624	-4.42039	-3.33126	-2.51715	-2.36095	-1.6746	-2.2824	1.2303	0.119256	-2.20683	-1.21129	-4.82603	-5.64713	-3.78776	-0.0117255	-1.10924	0.39936	-1.95706	-3.33306	-1.83982	-2.60054	-2.59927	-2.51801	-4.00376	-4.22692	-4.30025	-1.42695	-3.50445	-3.61461	-3.42749	-0.576993	-3.74476	-2.09056	-4.20589	-6.40536	-0.55731	-0.948229	-3.48809	-4.24952	-3.85086	-5.83209	-1.90676	-1.58546	-0.0982933	0.360019	-2.64521
198	-3.54023	-4.81245	-4.30271	-3.20234	-2.02068	-1.86182	-1.6933	-0.886174	-0.0491906	-0.55801	-1.16898	-2.11662	-5.53593	-4.67912	-3.39981	0.120556	-1.77145	-0.555394	-2.66886	-3.45222	-2.00559	-2.11361	-3.29444	-4.23514	-4.0668	-3.06362	-3.59373	-2.17131	-3.98137	-1.17952	-0.693571	-1.17707	-2.23813	-2.48854	-2.61552	-4.57479	-1.38792	-0.812041	-3.60656	-4.54328	-5.66483	-6.07956	-2.08685	-2.02404	-1.01267	-0.223908	-1.69079
199	-5.24547	-3.10848	-3.50007	-2.7875	-3.61614	-2.22116	-1.32456	-1.27613	0.0131678	-0.850964	-2.62191	-1.78174	-4.84725	-4.5897	-4.42456	-0.309048	-1.74684	-0.409957	-1.80541	-4.05729	-2.94989	-1.98383	-1.94833	-3.60535	-2.51244	-3.85554	-4.63186	-1.49596	-4.10782	-2.43429	-2.52462	-1.97139	-3.44219	-3.38014	-2.51054	-6.38932	-0.409199	-0.778969	-4.62047	-3.78595	-3.32392	-6.17821	-1.15808	-2.1419	0.0744671	-0.175737	-1.2426
200	-3.45037	-4.89343	-4.28542	-3.92685	-2.13893	-2.45169	-2.14637	-1.80845	-0.574998	-0.707614	-2.31918	-1.73303	-5.40724	-4.87502	-3.75278	-0.749198	-0.974408	-0.694702	-2.85453	-2.22407	-0.850061	-2.12343	-2.21835	-2.215	-3.08674	-2.4051	-4.02669	-1.81539	-3.46218	-2.40536	-2.52448	-1.51271	-3.34317	-2.70729	-3.02085	-4.31359	-1.38802	-1.36717	-4.41324	-5.15809	-4.01828	-6.76026	-1.70091	-1.4386	-0.0181149	0.745285	-1.36104
201	-3.47731	-3.91988	-5.30445	-3.78617	-3.09675	-3.01597	-1.67479	-0.298513	-0.403116	-0.821527	-2.49925	-2.11952	-5.00958	-4.58883	-3.5313	-0.415721	-1.3466	-0.892908	-1.46655	-3.01819	-3.0964	-1.8257	-2.33197	-3.09927	-2.13376	-2.98825	-3.67011	-2.8883	-4.63706	-2.87843	-1.62713	-1.99929	-2.99204	-2.02447	-2.98559	-4.71934	-0.07945	-1.44908	-3.27546	-4.30434	-4.80125	-5.94289	-2.34811	-1.87868	-0.896042	-0.181196	-2.28001
202	-3.79882	-3.31169	-5.00591	-3.90281	-2.57773	-2.54478	-0.889224	-1.35984	0.883507	-0.692384	-1.55634	-1.2602	-4.43852	-4.62513	-4.08471	-0.29736	-2.01469	0.146415	-1.81059	-4.14425	-2.10634	-2.89007	-2.31621	-2.82066	-3.54925	-3.81103	-4.14464	-1.65961	-3.67576	-1.76709	-2.8608	-2.46366	-3.0484	-2.37383	-2.90446	-5.27513	-1.15091	-1.00303	-4.72806	-4.69175	-3.81734	-5.57041	-1.37178	-1.60313	0.305741	0.508288	-2.32188
203	-4.12814	-4.9976	-4.20298	-3.78681	-2.07446	-2.84296	-1.76238	-0.950285	-0.678152	-1.03777	-2.50874	-2.78798	-4.56259	-4.37434	-3.80768	0.186124	-1.72119	0.0688876	-1.65651	-2.4255	-1.14005	-3.31627	-3.27721	-2.05037	-3.48483	-4.37997	-4.04243	-2.46603	-2.91683	-3.30236	-3.14947	-0.831515	-3.51452	-2.58909	-3.40522	-4.55059	-0.816793	-0.653662	-2.9033	-6.02904	-3.3606	-5.56363	-1.41947	-2.65389	0.125133	-0.42577	-2.1285
204	-4.17184	-5.21143	-4.62124	-3.86712	-4.01435	-2.66209	-2.14387	-0.771794	0.0833547	0.125026	-1.37069	-1.29957	-4.26313	-3.57348	-2.65033	0.296377	-2.2116	0.124576	-1.64496	-2.80606	-1.98478	-2.96628	-2.65313	-3.64015	-2.41774	-3.28572	-3.85372	-3.41856	-3.84374	-3.09356	-3.38348	-2.06201	-3.86872	-2.19963	-2.67497	-4.8975	-2.74812	-2.47128	-2.62711	-4.27417	-4.45412	-6.59181	-2.03138	-1.77669	-0.500718	-0.191311	-1.751
205	-4.19185	-3.51395	-3.47763	-3.90163	-2.09291	-2.92921	-0.62716	0.169323	0.806398	-0.761066	-2.46268	-2.04062	-4.72677	-4.89629	-3.58789	-0.417697	-1.12886	-0.78358	-1.49652	-1.86738	-1.26907	-3.6258	-2.9497	-1.89279	-2.72404	-3.50096	-4.25879	-2.47178	-3.03021	-3.52361	-1.52554	-3.23965	-4.32249	-3.08423	-2.45369	-4.37387	-1.29174	-1.11388	-4.70844	-4.594	-3.15688	-5.91487	-1.92285	-1.65577	-0.946883	0.26314	-1.46627
206	-2.93456	-4.50858	-2.87811	-3.13286	-2.2067	-2.67959	-0.897229	-1.32409	0.264099	0.200836	-0.959342	-1.37688	-4.93236	-4.43823	-3.29859	-0.085265	-1.17743	0.118942	-2.439	-1.43216	-1.47651	-1.70827	-1.51867	-2.51404	-3.03993	-4.07414	-3.85171	-2.26299	-3.22823	-1.8058	-1.68752	-0.735872	-3.82935	-1.26522	-3.47906	-4.25103	-2.60001	-2.13022	-3.79958	-5.08485	-3.71305	-5.47795	-1.80556	-1.11484	-1.0355	-0.502712	-2.14379
207	-3.5606	-5.02022	-4.23352	-3.31649	-3.01078	-1.66041	-1.14299	-1.21904	-0.676911	0.547193	-1.89508	-0.119969	-4.28887	-3.76819	-3.57075	-0.957044	-2.65046	-0.219641	-1.54365	-3.50087	-1.68432	-1.75652	-2.8672	-3.97452	-2.30866	-4.56738	-4.19236	-1.74042	-3.41049	-1.62033	-1.19592	-2.48644	-3.85172	-1.95789	-2.01393	-3.12864	-1.66732	-0.920293	-4.16737	-4.41876	-2.68565	-5.4589	-1.93111	-2.37007	-0.958902	-0.785787	-1.93022
208	-4.62263	-4.13718	-4.27987	-3.24472	-2.97907	-2.27121	-2.09749	-0.951303	-0.0143162	-0.339917	-2.35253	-1.81991	-4.34431	-4.74928	-2.88511	0.153554	-2.40976	-0.948608	-2.17204	-2.64615	-1.90454	-1.88528	-2.39874	-3.9099	-2.70453	-3.0538	-4.47615	-1.06685	-3.44153	-1.62856	-0.710602	-1.77502	-4.34434	-3.08724	-3.71352	-3.76421	-0.61891	-1.45754	-3.62185	-5.29722	-4.36732	-6.23729	-1.51636	-1.93023	-0.49652	0.0380916	-2.54984
209	-3.27447	-4.61762	-4.1049	-3.53957	-2.61612	-2.84071	0.233995	0.646666	0.46018	-0.223355	-1.86347	-0.310081	-4.17071	-4.98939	-3.99273	0.107262	-1.18599	-0.7858	-1.72259	-3.02116	-0.799217	-2.09685	-1.34137	-2.9086	-3.26946	-3.4183	-4.55363	-3.70778	-4.52833	-2.8549	-0.721051	-0.653041	-3.47608	-2.48959	-2.75809	-4.24813	-2.02495	-1.71799	-3.44752	-3.58529	-4.92572	-5.74497	-1.37172	-1.36253	-0.0423069	0.195016	-1.2001
210	-3.65715	-3.702	-3.21363	-3.13104	-3.2031	-3.47587	-1.85628	-0.960984	-1.48266	-0.604503	-1.10662	-2.68921	-4.24756	-4.20544	-3.09686	-0.279298	-1.44595	-0.559507	-1.22449	-3.18393	-1.7355	-2.11074	-2.86503	-3.86846	-2.87204	-3.6865	-3.43154	-3.02987	-1.91499	-2.33499	-2.87041	-2.19717	-2.98728	-1.65355	-2.64134	-3.64214	-0.822553	-0.966039	-3.6445	-4.53467	-4.27306	-5.81224	-1.64292	-1.4176	0.32356	-0.668239	-1.58079
211	-4.96658	-4.10228	-4.40526	-3.08493	-3.18843	-2.22029	-0.94472	-0.135957	-0.0666557	-0.422227	-1.72428	-1.83074	-4.42105	-3.35684	-3.36434	-0.105101	-0.595706	-0.0232416	-2.1941	-2.29499	-2.02778	-4.4991	-2.68439	-3.71674	-1.95475	-3.96187	-3.4952	-3.50993	-3.54358	-4.71214	-0.879752	-0.402176	-3.17945	-2.54443	-1.02192	-2.4432	-0.549085	-1.067	-4.56433	-5.29912	-3.52843	-5.81797	-1.76421	-1.43	-0.361313	-0.650836	-1.23756
212	-3.67134	-4.06203	-4.22873	-3.37015	-2.7823	-2.61938	-1.01466	-0.863533	-0.504814	-1.78579	-1.8072	-1.38871	-4.2891	-4.67814	-3.37663	-0.448747	-1.54076	-0.178795	-1.76338	-1.88939	-1.7397	-1.63166	-2.5352	-3.41305	-3.74321	-2.46764	-3.15683	-2.83958	-2.80662	-1.42044	-1.86485	-1.9086	-3.04835	-1.29952	-1.93352	-2.21105	-2.38544	-0.831361	-3.22107	-3.95707	-3.03627	-5.6392	-1.18181	-1.87665	-0.124089	-0.609668	-0.243697
213	-3.35717	-5.67995	-3.27919	-3.75602	-2.01535	-2.73217	-1.57944	-0.433575	1.1521	-0.520709	-1.9053	-2.25175	-4.64743	-4.61085	-2.76647	-0.208162	-1.16452	-0.572501	-1.89461	-4.71378	-1.29119	-2.60772	-2.14209	-3.66974	-2.27051	-2.87943	-3.1186	-2.2136	-1.75233	-1.80712	-1.40163	-1.9529	-2.70091	-2.89805	-2.68471	-2.98379	-0.567749	-1.17511	-4.27122	-5.15909	-4.84694	-5.08907	-1.48612	-1.8412	-0.373738	-0.475702	-0.64483
214	-3.35282	-3.72293	-3.34599	-4.42833	-2.53967	-3.09557	-1.64657	-2.37303	-0.193981	1.12049	-1.31976	-2.7837	-4.59506	-3.62032	-3.42036	0.194877	-0.567524	-0.922603	-1.59969	-3.62763	-2.36936	-2.65112	-2.05479	-1.85203	-3.61937	-3.59644	-3.81612	-2.47418	-2.28295	-1.3925	-2.80469	-0.550919	-2.62839	-3.0357	-2.72143	-2.81459	-0.0213983	-1.68999	-4.20816	-6.04005	-3.78271	-5.90282	-1.86304	-1.65389	-0.453801	-0.563894	-1.50119
215	-3.69507	-3.46283	-4.11677	-4.62409	-1.70199	-2.28518	-1.14702	-1.47619	-0.513925	0.920765	-1.31826	-1.63477	-5.14163	-4.18978	-4.24721	-0.599132	-1.11865	-0.324813	-2.59549	-3.83462	-1.81047	-2.5951	-2.66249	-2.18855	-3.50338	-3.36127	-3.56437	-3.15743	-4.71428	-1.97758	-2.81124	-1.46264	-3.64156	-3.54736	-3.08287	-2.01426	-0.984929	-0.392067	-3.10026	-5.39806	-4.9409	-5.16104	-1.69501	-2.53336	-0.877823	-0.616386	-2.4654
216	-4.06962	-3.59857	-2.92226	-3.67656	-3.01297	-2.94647	-1.07076	-2.48911	-0.768894	-1.82402	-2.05555	-1.97709	-4.19727	-4.32714	-2.79875	-0.0431988	-1.25565	-0.228926	-2.04641	-3.38316	-1.40571	-2.37733	-3.21329	-2.15736	-3.40609	-2.87676	-5.05786	-2.66434	-2.62726	-2.43056	-2.86743	-1.29291	-3.59479	-3.45343	-2.7947	-1.66675	-1.36484	-0.729962	-4.05655	-4.51578	-2.56189	-6.17034	-1.02838	-1.46065	-0.640268	-0.551059	-2.60717
217	-3.79509	-4.86074	-3.99859	-2.92594	-2.99727	-1.58712	-1.60533	-1.30879	-0.825714	-0.839757	-1.42712	-2.42429	-4.35068	-3.85678	-2.90899	-0.848092	-2.21858	-0.194746	-1.63411	-3.25346	-1.42543	-2.08497	-3.17792	-3.41491	-2.51542	-2.62663	-4.46547	-1.49077	-4.59475	-1.28825	-2.03773	-1.3011	-4.22137	-4.32987	-2.37434	-2.50891	-0.435356	-1.24846	-3.77351	-3.69483	-4.24963	-6.09417	-2.40761	-1.63896	-0.204631	-0.928382	-2.20266
218	-4.01694	-4.54052	-2.83052	-2.94642	-3.78363	-1.79227	-1.68618	0.262594	0.653214	0.300366	-0.811962	-3.50509	-4.56306	-4.6628	-3.85145	-0.278787	-1.19869	0.27575	-1.12604	-3.33617	-1.58966	-1.78872	-2.41744	-2.34393	-3.82483	-4.21742	-4.56583	-1.15447	-3.76452	-1.04964	-0.0977715	-1.07804	-3.45232	-3.15538	-2.62004	-2.88826	-0.645704	-1.12834	-3.10192	-5.08495	-4.15431	-5.85812	-1.74464	-1.8175	-1.489	-0.19752	-1.29095
219	-3.5229	-4.51929	-4.12512	-3.25951	-2.86016	-1.51216	-2.8273	-0.51801	0.632234	-0.0349533	-0.784822	-1.98761	-4.98353	-3.56277	-3.6246	0.0100627	-1.13123	-0.764768	-1.12964	-3.76642	-2.00097	-2.28432	-3.06447	-2.50191	-2.43741	-2.68975	-3.83033	-0.788304	-2.07563	-2.52848	-1.3034	-2.51383	-2.6105	-2.07429	-3.53348	-2.55414	-1.82923	-2.47704	-3.9446	-3.99068	-2.92897	-5.52123	-1.79161	-2.02556	-1.21116	-0.807707	-1.29995
220	-3.33245	-4.57876	-3.72837	-3.90669	-2.583	-2.88599	-2.85984	-1.5706	-0.949715	-1.40763	-1.09535	-1.90156	-5.0889	-5.15849	-3.31991	0.461191	-2.9819	-0.966205	-1.20015	-3.24938	-1.46519	-2.13674	-1.24105	-2.26632	-3.07166	-1.75376	-2.61223	-0.791351	-3.49044	-2.70458	-1.83923	-1.41629	-3.35179	-3.30635	-2.70471	-2.18337	-1.52631	-1.62349	-4.02824	-3.41851	-2.90748	-4.62263	-1.31211	-1.27708	-0.629991	-1.62677	-2.69813
221	-2.72237	-3.45323	-3.67574	-2.77559	-2.51724	-1.53804	-0.321224	-1.85253	0.0596704	0.62931	-1.3931	-2.31629	-4.41098	-4.57306	-3.48608	-0.364172	-1.79749	0.1374	-1.94362	-2.37979	-0.739823	-2.65689	-3.91062	-2.91361	-2.79017	-2.84906	-4.24743	-0.90706	-1.89352	-2.45664	-0.754678	-1.56497	-2.42987	-3.66827	-2.24341	-2.31298	-1.84405	-0.241079	-4.683	-4.86488	-3.16532	-4.87281	-1.88733	-1.35493	-1.19504	0.258688	-1.32228
222	-3.6163	-4.43123	-3.03141	-3.13717	-2.57478	-2.57822	-0.407929	-0.566431	-1.80155	-0.44982	-1.42942	-1.79852	-4.36225	-3.67412	-4.08986	0.0609408	-1.49124	-0.0406045	-2.54699	-2.73486	-1.83781	-1.68318	-2.57049	-2.18167	-2.58646	-2.67505	-2.78242	-1.92045	-4.30528	-1.65706	-1.34984	-1.52875	-3.05311	-2.46988	-4.19829	-1.92762	-1.4051	-2.17737	-3.50344	-3.34466	-3.0772	-5.71257	-1.9041	-0.960573	-0.776237	-0.400728	-1.63424
223	-3.90269	-3.28868	-3.57739	-3.04779	-3.18131	-2.11865	-1.64107	-0.692775	-0.354871	0.742733	-0.59763	-2.15211	-5.31211	-3.77211	-3.95242	-0.698476	-2.04285	-0.296232	-0.841771	-2.87713	-1.90831	-1.64829	-3.16594	-2.29667	-3.92031	-2.52464	-4.20521	-1.17159	-3.24376	-0.593021	-2.73413	-2.52106	-2.79967	-2.80188	-2.59799	-2.14987	-0.929437	-1.19139	-3.38511	-3.57897	-2.84119	-6.29037	-2.19074	-1.59811	-0.681132	-0.643691	-1.48926
224	-5.06947	-5.08112	-4.0689	-3.45833	-2.68793	-4.53681	-2.01847	-1.62186	0.434153	0.0495422	-0.658397	-2.75987	-4.46086	-4.63647	-3.78504	-0.245196	-1.8804	-0.0480337	-1.7889	-1.96227	-1.48645	-2.91891	-3.70859	-2.12532	-3.42443	-2.39284	-3.5015	-2.45899	-2.11581	-1.62179	-1.34629	-1.43208	-3.22233	-2.35087	-3.05736	-3.34344	-2.10559	-0.384594	-3.20257	-3.82353	-2.98589	-4.82697	-1.40509	-1.86548	-1.12825	0.0902103	-1.41637
225	-3.71393	-3.62032	-3.39359	-2.62638	-2.53761	-4.03696	-2.15965	-1.62509	0.327547	-0.667031	-1.04496	-1.12503	-4.78264	-3.86375	-3.89737	-0.342979	-1.05863	-0.582363	-2.01543	-3.50104	-1.75517	-1.56201	-2.35364	-3.00507	-3.01382	-3.667	-2.8223	-1.20678	-3.70352	-2.7926	-1.74816	-1.56931	-3.24581	-3.31421	-2.41382	-2.81279	-1.85113	-1.23896	-3.2513	-3.84096	-2.7662	-5.86631	-1.40536	-1.52784	-0.935718	-0.907671	-2.28096
226	-3.02472	-4.19152	-3.30303	-3.41742	-2.50924	-4.04431	-2.0735	-0.490303	0.697447	0.423779	-0.196004	-1.78412	-3.4146	-3.73186	-3.2752	0.348134	-0.858948	-0.0901101	-1.52548	-2.41513	-1.17281	-1.87697	-3.44107	-2.36389	-4.03139	-2.45937	-2.54109	-1.22985	-3.20086	-1.79489	-1.7515	-1.66967	-2.59653	-2.49547	-2.97448	-2.60602	-1.3364	-0.115181	-4.09055	-4.66772	-2.96571	-5.0286	-1.82935	-1.73989	-0.37425	-0.228168	-1.64807
227	-2.70358	-2.74319	-3.30764	-3.50127	-1.91679	-3.36637	0.430528	-1.25461	0.190353	0.454685	-1.5763	-2.12314	-4.31006	-4.54978	-3.5753	-0.307874	-1.4475	-0.983254	-1.65473	-4.8438	-1.22148	-1.83112	-2.52459	-2.12766	-1.95166	-2.88643	-2.97367	-1.5523	-2.04886	-3.16627	-2.95762	-1.71226	-2.6571	-1.94483	-1.7824	-2.30794	-3.16585	-0.0625911	-4.82869	-3.79243	-3.26844	-5.2935	-1.62708	-2.21212	-0.29656	-0.8542	-0.697884
228	-3.34988	-6.53724	-3.30922	-3.03594	-2.32082	-2.42281	-0.869658	0.177464	0.676773	-0.156369	-0.798193	-1.94237	-3.08417	-4.44901	-3.10702	0.50563	-1.28226	-0.595613	-2.20138	-4.04372	-1.15932	-1.7465	-2.03548	-4.20446	-2.93256	-2.54104	-3.21798	-2.94474	-1.52407	-1.49965	-0.471453	-2.06101	-2.5633	-2.42716	-2.14337	-2.34339	-1.2578	-1.20976	-3.93364	-3.80299	-3.17404	-4.99192	-1.09168	-2.64752	-2.14188	-0.479231	-1.32474
229	-3.6026	-5.89229	-4.14557	-2.94168	-2.61317	-2.05727	-0.318046	-0.773439	-0.862825	-1.7496	-1.19503	-2.79202	-3.80515	-4.5153	-3.33583	-0.0746704	-1.29269	-0.7577	-2.09052	-3.48556	-1.87451	-1.11814	-2.43081	-2.04944	-2.17964	-3.58399	-5.26032	-0.963009	-1.8573	-1.74998	-2.64565	-0.75293	-2.03703	-2.82308	-2.58573	-2.55489	-1.12259	-0.601545	-1.97537	-4.29529	-2.92887	-4.80272	-2.02425	-2.18976	0.217658	-0.194637	-0.859255
230	-3.99042	-3.0093	-2.73259	-2.775	-1.94872	-2.30647	-1.21139	-0.844976	-0.642887	-1.28755	-1.89451	-2.03731	-4.14773	-3.31632	-2.58984	-0.294014	-1.54594	0.509837	-2.87187	-2.34463	-0.574727	-2.40169	-1.76944	-3.21107	-2.40519	-2.94674	-2.85614	-2.47919	-2.71987	-2.31783	-2.27009	-1.43837	-2.55197	-2.84991	-2.26838	-3.4489	-1.55828	-0.958592	-3.82518	-4.31963	-3.14873	-4.73019	-1.23819	-2.35688	-0.741762	-0.845033	-1.09158
231	-3.012	-4.35175	-3.50247	-3.00968	-2.75186	-2.85702	-1.6292	0.177955	0.413605	-0.856509	-1.56767	-1.29808	-3.91123	-3.59992	-2.93913	-0.100733	-2.06738	-0.889794	-0.71683	-3.15895	-1.84965	-1.82777	-0.816716	-2.99413	-3.27534	-3.89306	-3.30748	-2.92091	-1.9649	-1.45321	-1.72688	-0.0550129	-1.99344	-2.00983	-1.73427	-2.78108	-2.54462	-0.607521	-2.55123	-3.88449	-4.23939	-6.98972	-1.12474	-0.97443	-0.997147	-0.786239	-1.35678
232	-2.41319	-4.75736	-3.29798	-1.90249	-2.72267	-1.75122	-1.44568	-2.07551	-0.160266	-1.86671	-1.34071	-2.60551	-3.49197	-2.69531	-2.64713	0.0166528	-1.08842	-1.19647	-0.776143	-3.91808	-0.756917	-1.35012	-2.67424	-2.88098	-2.67492	-2.33962	-3.42956	-2.22278	-3.57701	-0.151318	-2.10013	-0.427095	-2.69429	-1.7682	-1.26319	-1.23117	-1.84755	-1.47756	-4.03126	-3.54873	-3.10753	-4.13069	-1.96388	-0.817708	-2.0001	0.0204629	-0.746207
233	-2.70447	-4.11804	-3.31398	-2.15913	-3.82428	-2.25103	-1.3053	-1.59163	0.744405	-1.1631	-1.54317	-1.0408	-4.60291	-4.07282	-2.59759	-0.258662	-1.59989	-1.37561	-1.98295	-3.73701	-0.916581	-2.60813	-2.12638	-2.89657	-3.52299	-3.96536	-2.66158	-2.34284	-1.65542	-2.06943	-3.10482	-0.699688	-2.7321	-2.19491	-1.76298	-2.80553	-1.21317	-2.30596	-2.85094	-4.04597	-2.83038	-4.37537	-0.911529	-1.71776	-1.13071	-1.15527	0.311004
234	-2.98393	-4.58695	-3.54307	-2.35672	-2.89048	-1.53749	-0.618195	-1.69993	0.391991	0.88394	-1.0703	-2.47373	-4.18338	-3.28783	-2.163	0.316023	-1.04347	-0.566504	-2.65532	-1.91795	-2.15873	-2.56095	-1.87809	-1.87872	-2.99954	-1.76677	-2.76649	-2.66568	-3.62188	-2.34222	-2.27602	-1.34363	-2.9813	-2.34391	-2.3646	-2.45398	-2.40785	-1.71932	-1.82796	-2.98397	-3.32452	-4.98967	-0.919095	-1.72797	-1.16389	-1.04119	-1.24285
235	-3.04956	-3.53109	-3.39498	-2.61625	-2.74309	-2.98868	0.572371	-0.154236	0.369681	-1.33322	-0.65271	-1.5545	-3.35916	-3.80606	-2.80962	-0.232341	-1.57898	-0.440471	-2.21246	-1.67071	-1.30258	-1.84598	-3.45045	-1.55987	-2.13971	-3.0635	-2.48658	-1.84807	-2.66385	-2.45114	-1.04364	-1.27822	-1.62665	-2.76785	-2.38723	-3.93605	-1.29922	-0.492816	-4.91202	-3.60928	-2.75226	-5.376	-1.59484	-2.34055	-0.69667	-2.49083	-1.73762
236	-2.49145	-3.27629	-4.2611	-2.35357	-2.44365	-2.64467	-0.246735	-0.700599	-0.312509	-0.521947	-0.555915	-1.74684	-3.8175	-3.63199	-2.85042	-0.592802	-1.36584	-0.557818	-1.44521	-1.92203	-1.21422	-1.29936	-1.79067	-2.8666	-1.56309	-2.06334	-4.07097	-0.84199	-1.62025	-2.80657	-1.43091	-1.32322	-2.94238	-2.74093	-0.522814	-2.31011	-2.23574	-0.461948	-2.06413	-3.51697	-3.5714	-4.89452	-1.49377	-1.04971	-0.506946	-1.51268	-0.464274
237	-2.49828	-2.82785	-2.77432	-3.52331	-0.995637	-3.67294	-0.719698	-0.022703	0.651065	0.4548	-0.23264	-3.08641	-3.95434	-4.0552	-2.37901	-0.375964	-1.62046	-0.32619	-0.758489	-2.44882	-2.80926	-1.25091	-3.65078	-3.57098	-3.15964	-1.60128	-2.3099	-2.42313	-3.51883	-0.369138	-1.85158	-0.672856	-3.33889	-2.86908	-1.67515	-2.66112	-1.76505	-0.097332	-2.85758	-4.95245	-2.0291	-3.95934	-0.794842	-1.27607	-0.77307	-0.695663	-1.1353
238	-2.49946	-4.19409	-3.87158	-2.73051	-3.04401	-2.60294	-1.14952	0.0401836	0.0474753	-0.0827195	-1.12879	-1.83038	-4.4442	-3.1148	-1.95637	0.0481898	-1.08713	0.0329539	-1.22432	-1.68382	-2.52455	-1.26585	-2.62547	-2.17657	-3.68154	-2.19489	-1.81335	-2.3056	-3.19833	-1.4809	-2.08225	-1.09467	-2.55833	-1.74097	-1.791	-2.53245	-1.11771	-1.03068	-3.30319	-3.70607	-2.55377	-5.55927	-1.62323	-1.58642	-1.31084	-0.787199	-1.55738
239	-2.61803	-2.62687	-3.44335	-2.34414	-1.60867	-2.12589	0.145384	-0.169178	-0.21394	0.515048	-0.5648	-2.78531	-3.64249	-3.35778	-1.94266	0.177237	-0.729176	-0.786191	-1.62847	-2.46549	-0.756463	-0.990487	-2.33728	-2.1593	-2.34206	-3.64321	-1.33756	-1.19185	-2.44352	-2.29677	-2.67855	-1.73588	-1.39737	-2.30764	-3.40882	-2.34542	-1.51595	-0.981005	-3.01634	-3.22728	-2.97336	-4.73402	-1.58172	-2.06366	0.660649	-0.972384	-0.434173
240	-2.44972	-4.08442	-4.59495	-3.00318	-1.74824	-2.21477	-0.514536	0.355166	1.01295	-0.776763	-1.18006	-3.17384	-3.56529	-2.90163	-2.66639	-0.272267	-1.48766	-0.540853	-0.431551	-2.07138	-1.29646	-0.808903	-1.73451	-2.47824	-2.23807	-2.68116	-2.26865	-1.92915	-2.10828	-0.348893	-1.76466	-0.760615	-1.9384	-2.59326	-2.19908	-1.6266	-1.04927	-1.14471	-2.78327	-2.86947	-3.25004	-5.21064	-1.9043	-1.15056	-0.50982	-0.465851	-1.11825
241	-3.56507	-2.69305	-2.6322	-2.84625	-1.54637	-3.10142	-0.0876486	-0.516459	-0.858519	-0.0810986	-1.97751	-2.07771	-3.55377	-2.64358	-2.54797	-0.20632	-1.23904	-1.14437	-1.69323	-2.65711	-1.48238	-1.31248	-2.76808	-1.79641	-1.60163	-3.98472	-3.33795	-2.45606	-3.06643	-1.07744	-0.232303	-1.04723	-3.405	-4.61768	-2.067	-0.534031	-1.50704	-1.20785	-2.68274	-4.24682	-3.20903	-4.66774	-1.17876	-1.43743	-0.465312	-1.3448	-1.02099
242	-2.65654	-2.26095	-2.41457	-4.27737	-3.44966	-1.68025	-0.337517	-3.16455	-0.657851	0.669941	-0.729443	-1.73183	-3.77836	-3.41489	-2.27111	0.0817863	-1.30711	-0.506153	-1.6011	-2.45044	-1.4529	-2.32186	-2.35569	-1.69043	-2.17757	-3.12159	-3.21743	-2.03088	-2.39608	-2.19374	-1.7422	-1.60059	-0.742306	-3.8147	-2.02538	-1.16759	-2.18094	-1.31754	-2.65462	-5.02763	-2.9353	-4.46591	-1.52196	-1.60511	-0.925881	0.333075	-0.688182
243	-2.96596	-3.50739	-3.715	-2.35093	-1.8798	-2.54946	0.819071	-0.109846	0.0290223	-0.535934	-0.928723	-1.55952	-2.9483	-3.04966	-2.76428	0.0115539	-0.98657	-0.234866	-0.622346	-2.43474	-0.758981	-2.62961	-1.54703	-1.97648	-1.1755	-2.79464	-2.64118	-1.09765	0.311917	-0.59581	-1.10901	-1.67746	-2.55008	-4.35411	-0.880741	-1.63769	-1.28717	-2.22729	-2.58857	-3.52148	-2.86624	-3.69719	-1.05608	-1.53996	-1.11141	-1.09192	-2.05303
244	-2.13601	-3.37418	-3.34793	-2.37305	-2.03165	-2.61121	-0.197618	-0.701702	-0.0599067	0.804962	-1.00205	-1.54948	-3.50868	-2.80821	-2.51343	0.364391	-1.2799	-0.693645	0.0964381	-2.82663	-2.22125	-2.43598	-2.68757	-2.11307	-2.23116	-2.09662	-3.77043	-1.14378	-0.888598	-2.28307	-1.635	-1.00077	-2.11883	-2.72036	-2.48215	-1.23227	-2.42733	-1.09797	-2.29354	-2.51703	-3.23851	-4.31207	-1.96483	-1.92588	-0.214253	-1.1161	-1.25323
245	-2.45287	-3.26935	-3.6317	-2.24223	-1.29367	-2.59269	0.646941	-0.142241	1.16623	-0.0684474	-1.68796	-1.33111	-3.58683	-3.3468	-3.02969	0.208899	-0.996693	-0.246373	-1.31865	-3.67548	-0.956896	-1.62271	-3.12607	-3.30396	-2.75138	-2.03035	-2.63182	-0.8645	-2.81465	-1.94155	-0.1367	-1.97612	-2.32984	-3.15893	-1.21019	-0.651948	-0.443494	0.0761494	-2.31954	-2.18502	-2.89004	-4.71136	-1.8716	-1.87301	-1.35125	-0.461579	-1.07064
246	-3.00047	-3.30059	-3.24738	-2.95836	-2.66589	-2.78095	0.632334	-0.183089	0.0360805	0.388383	-1.54537	-1.5631	-2.95515	-3.08903	-2.27026	0.0808759	-1.06827	-0.417335	-1.33385	-1.41346	-1.06922	-1.82277	-2.94755	-2.03179	-2.60826	-3.53517	-2.48155	-1.00959	-1.05022	-1.17281	0.0899987	-1.22111	-1.57921	-3.65575	-0.88818	-1.08863	-1.26625	-0.687602	-3.45422	-3.6493	-1.83234	-3.65294	-1.37771	-1.12884	0.43336	-0.77348	-2.69556
247	-2.22303	-3.59249	-3.13286	-2.87943	-1.0823	-2.41265	0.316666	0.171346	-2.56815	0.347943	-1.47502	-1.13123	-3.99046	-2.87316	-2.64315	-0.34598	-1.61208	-0.339778	-1.67432	-2.97172	-2.10371	-2.26452	-1.56887	-1.10743	-1.19562	-1.29135	-3.15508	-0.129733	-1.95266	-1.5265	-1.30912	-2.54216	-1.73946	-2.57465	-1.31851	-0.38056	-0.996782	-1.14129	-2.74061	-3.49317	-3.59936	-5.34122	-1.56156	-1.453	-0.357755	-0.616151	-1.28143
248	-2.27675	-3.37799	-3.85699	-1.85335	-2.92025	-2.34134	-0.972821	0.232669	0.717592	-0.396821	-0.968023	-1.53793	-2.83297	-3.37966	-1.74295	0.575241	-0.973526	-0.0445758	-1.03027	-2.58355	-1.65337	-0.87357	-2.21228	-1.69949	-3.72291	-2.65125	-2.98529	-0.682549	-2.97387	-2.32442	-1.39156	-0.872488	-1.41123	-2.0928	-0.920035	-0.851142	-2.13397	-0.757746	-2.17253	-4.47784	-3.01181	-5.49282	-0.957189	-1.17454	-0.48432	0.227836	-0.64147
249	-2.92859	-3.96234	-2.81295	-2.90895	-2.64087	-3.41322	-0.344829	-0.995975	-0.437088	0.553283	-1.60437	-1.86918	-3.44041	-3.17774	-1.82487	0.101319	-0.795515	-0.604241	-1.83047	-1.91206	-1.19694	-1.39667	-1.43567	-1.35024	-2.34209	-2.48081	-2.90919	-1.50484	-3.18986	-2.22347	-0.94417	-1.62534	-1.59954	-3.36464	-2.5722	-1.04074	-2.03219	-0.946744	-3.4508	-3.36497	-3.86811	-4.79579	-0.892345	-0.959223	-0.602454	-0.554624	-1.3235
250	-2.34615	-2.54866	-4.08236	-2.17938	-1.28765	-2.5399	0.780111	-1.83321	0.619374	-0.273407	-1.42882	-1.41491	-3.05889	-3.25374	-1.9435	-0.947006	-1.42555	0.257866	-0.0840284	-3.01072	-0.93769	-1.17306	-1.38432	-1.95583	-1.29112	-1.45616	-2.00047	-1.07318	-1.56385	-0.466232	-0.225596	-1.24902	-0.605813	-2.46313	-1.12966	-1.57312	-1.50924	-2.72815	-2.39451	-3.78814	-3.95109	-4.28488	-1.43973	-1.06695	-0.468462	-1.17605	-0.707204
251	-3.2568	-3.11518	-3.56171	-2.34114	-3.25239	-2.91273	-0.089615	-1.31098	-0.599379	-0.858675	-1.13835	-2.5477	-3.50951	-3.27596	-2.7809	-0.0984758	-1.37765	-0.248738	-1.05726	-2.46303	-1.58101	-1.82553	-1.28127	-1.3302	-2.00862	-2.28002	-1.85555	-1.19604	-3.43814	-1.55032	-2.5764	-0.438268	-0.589342	-2.18495	-0.83613	-1.41671	-2.84317	-1.79439	-1.80106	-2.88824	-4.37273	-3.80943	-1.13282	-1.51068	-2.36559	-0.765896	-0.44132
252	-3.07557	-3.18274	-2.71624	-1.394	-1.87858	-2.87053	-1.01305	0.163156	0.404814	0.705053	-0.851577	-1.45966	-2.83361	-2.51459	-2.7978	-0.992279	-0.555584	-0.464093	-1.21491	-2.37434	-0.883877	-1.55604	-0.524252	-1.73528	-1.40222	-1.44866	-4.09525	-2.52594	-0.523051	-2.83983	0.108316	-0.443321	-1.15544	-2.85309	-2.57319	-2.12477	-1.74969	-0.601994	-2.64988	-3.4331	-2.7483	-4.55664	-0.933926	-1.11267	-0.359818	-0.346672	-1.40104
253	-2.29737	-3.34363	-2.13901	-2.70595	-1.83677	-0.971801	0.328937	-2.06155	0.0523058	-0.983724	-1.6213	-1.20038	-1.85262	-3.63087	-2.63476	-0.416288	-0.791551	0.216704	-1.79763	-3.16694	-1.93658	-1.97545	-2.16683	-2.13573	-2.51674	-1.84253	-2.47912	-2.13108	-0.316189	-0.419302	-0.226005	-1.1948	-1.40189	-2.97937	-1.52382	-2.63151	-1.58739	-0.682551	-2.95378	-3.04339	-2.29609	-4.89695	-1.52792	-1.65875	-1.97871	-0.717539	-2.20015
254	-1.50536	-3.95324	-2.00531	-3.09059	-1.80998	-2.39639	-0.285697	-1.21144	-0.426567	-0.835857	-1.40567	-1.88553	-2.49268	-3.57875	-2.81998	0.0591374	-1.70147	-0.510364	-1.4264	-2.78477	-0.817654	-1.57434	-3.73394	-1.45484	-1.52479	-3.20979	-1.50583	-0.776036	-2.82543	0.129532	-0.818375	-0.551585	-1.47618	-2.07618	-1.09449	-1.02632	-3.10045	-0.478871	-2.41688	-2.156	-2.96198	-5.10904	-1.68696	-1.18683	-1.49604	0.521451	-0.96103
255	-2.46394	-2.71813	-2.42042	-2.45949	-1.55343	-2.6482	0.323414	0.426815	1.54563	0.481157	-1.09793	-1.45296	-2.50161	-3.16253	-2.53305	-0.402746	-1.14156	0.600673	-1.983	-2.77849	-0.623898	-0.692346	-1.9147	-0.861951	-2.59979	-2.39277	-2.74639	-1.3563	-2.17945	-1.04591	-0.483187	-0.908881	-0.89482	-4.43767	-1.58515	-1.58979	-2.64044	-2.24261	-4.15443	-2.2609	-1.8697	-3.73228	-1.09712	-1.31427	-0.882866	-0.150228	-0.679389
256	-2.95545	-3.12665	-2.61734	-3.49056	-2.30248	-2.47366	-1.46143	-0.139761	0.00104864	0.0631591	-2.32882	-2.56929	-3.0704	-2.35149	-2.03981	0.274703	-0.966003	-1.74927	0.0533091	-2.26186	-1.11398	-1.04408	-2.36434	-0.717936	-1.11879	-1.68785	-1.7647	-1.37693	-2.22414	-3.06022	-0.780963	-1.28214	-2.22533	-2.7388	-2.45872	-2.04329	-1.54886	-2.41694	-3.18865	-1.92666	-1.19765	-3.14844	-1.49498	-0.924091	-0.291845	-0.344123	-0.708143
257	-1.93108	-2.069	-2.97327	-1.74539	-3.14635	-1.78803	0.202906	-0.655358	-0.335818	0.143649	-1.07244	-2.318	-2.85638	-2.8098	-1.78371	0.555998	-1.09209	-0.0726301	-0.919439	-2.65643	-0.708426	-1.74459	-2.67649	-1.46995	-1.43212	-1.45394	-1.33616	-1.37057	-1.39367	-1.77732	-0.433576	0.513279	-1.76637	-2.9133	-0.871833	-3.52352	-3.50578	-2.07531	-2.7883	-4.02891	-2.38335	-3.80897	-1.24356	-1.47785	0.796499	-0.928934	-0.62882
258	-2.38251	-2.80836	-2.94093	-1.47728	-0.834527	-1.80136	-0.775398	-0.829836	0.319146	0.153594	-2.00596	-1.12798	-3.3944	-3.79757	-2.04934	-0.382134	-0.626541	-1.12486	-0.776947	-2.54612	-2.12665	-1.22617	-0.753985	-1.12758	-1.12739	-2.62623	-1.89012	-1.60313	-0.909763	-1.36668	0.510907	-1.22945	-1.22055	-3.50792	-1.95324	-2.71183	-1.47135	-0.50901	-1.81467	-2.0439	-2.65026	-3.38096	-1.0664	-1.03508	0.65133	-1.27415	-0.386195
259	-1.98997	-4.38442	-2.48481	-1.77256	-2.54399	-2.63221	-0.336608	0.172964	0.850348	1.00926	-1.04775	-1.4878	-2.67024	-3.3663	-1.12195	-0.0829852	-2.12525	-0.888174	-1.36621	-1.83807	-0.698865	-1.80715	-2.11347	-1.69603	-1.4745	-1.72628	-2.44719	-0.614026	-3.99692	-1.578	-0.615858	0.116829	-1.2992	-4.39146	-2.93132	-2.28483	-1.72714	-1.46467	-3.11217	-2.46048	-1.30222	-4.15594	-1.3917	-1.00524	0.0891826	-0.693075	-0.853978
260	-1.42081	-2.7501	-2.10885	-2.09276	-1.90775	-0.78007	0.427723	-0.97783	0.612073	-0.455418	-2.61658	-2.85831	-2.83279	-3.96117	-2.12092	-0.0197446	-0.541795	-0.178959	-1.07597	-1.34471	-0.317623	-2.58512	-1.42154	-2.17907	-1.6885	-1.27761	-2.23144	-1.13436	-2.09531	-2.02044	-0.528317	-0.938765	-0.669055	-2.67838	-1.7137	-3.00087	-2.23172	-2.21957	-3.05091	-3.13146	-1.64229	-4.04538	-0.695352	-1.51343	-1.27329	-0.306554	-1.75037
261	-1.7839	-2.10009	-3.68317	-2.14355	-2.01625	-2.28517	0.763157	0.246776	0.83111	-0.211843	-1.55141	-2.45235	-2.37326	-2.15007	-2.39641	-1.3	-1.4885	0.20462	-1.39889	-2.47981	-1.18726	-2.00662	-2.21634	-1.18943	-1.11419	-2.23877	-2.27785	0.237538	-1.81321	-2.33078	-1.04249	-1.12676	-1.31554	-2.8822	-0.914195	-2.12043	-1.93922	-2.20214	-3.04336	-4.7639	-2.20822	-3.32464	-1.34643	-1.27641	-0.602796	0.34335	-1.47424
262	-1.0154	-2.10873	-3.99671	-3.30264	-1.53905	-2.43647	-0.85667	-0.772745	0.0565951	0.589873	-1.76768	-2.61125	-3.41636	-2.22417	-2.04564	-0.429591	-1.07407	0.667397	-1.43485	-2.08597	-0.881085	-1.02994	-1.19749	-1.51508	-1.7144	-2.68598	-1.38991	-1.97484	-1.06587	-1.23833	0.661652	0.715762	-1.4977	-2.77352	-2.24019	-2.98751	-1.09274	-1.79233	-1.41405	-2.18573	-2.32676	-3.35712	-1.47606	-1.80951	0.320702	0.380544	-1.69323
263	-1.32825	-2.06061	-3.74128	-2.03399	-1.77232	-2.05562	-1.02403	-2.36222	-1.09436	0.156781	-1.82456	-1.36168	-2.12292	-2.49882	-1.32296	-0.196773	-2.38212	-0.257138	-1.36868	-2.33887	-0.790421	-1.90401	-1.36192	-0.648332	-1.27113	-1.85864	-1.88848	-0.617928	-2.91715	-0.465941	-1.65662	-0.277942	-1.2641	-3.20928	-2.17559	-2.92981	-2.1352	-1.60532	-2.26385	-2.00872	-2.53784	-3.47794	-1.36865	-1.3686	-1.24072	-1.85117	-0.324189
264	-2.42774	-2.40037	-3.10328	-1.97519	-2.25843	-3.6907	-0.874538	-1.28354	0.0494925	0.309489	-0.445061	-1.84525	-3.7448	-3.23249	-1.36327	0.170784	-0.0941471	-0.0134634	-0.977689	-2.41853	-1.31632	-0.825764	-2.04046	-1.69344	-2.00101	-2.82695	-2.24385	-0.81711	-1.43699	-2.79464	-0.140422	-0.26914	-1.44024	-2.46717	-1.42062	-2.04656	-1.67364	-1.85556	-3.00283	-2.33744	-3.02745	-3.83414	-0.676276	-0.617493	-0.235382	-1.37654	-2.57135
265	-1.86293	-3.29029	-3.67197	-2.22466	-0.664817	-1.26538	-1.32543	-0.422066	1.09238	0.257548	-2.04697	-1.38305	-2.23559	-2.54078	-1.39035	0.357748	-0.691628	-0.305461	-0.749297	-2.56343	-1.44609	-0.995797	-1.48983	-1.80413	-1.44026	-2.08542	-1.81201	-0.48847	-3.67332	-1.73154	-0.419787	-0.389736	-0.335854	-2.17075	-0.527852	-1.24513	-1.35532	-0.403172	-1.55408	-4.36112	-2.35712	-4.57355	-0.784066	-1.12007	-0.95419	-0.511298	0.0337572
266	-1.70621	-2.55803	-1.33757	-2.39439	-2.17567	-1.216	-0.678359	-0.847229	0.136951	-0.478652	-1.4372	-1.41779	-3.05235	-2.70821	-1.76317	-0.346587	-0.251176	0.0506664	-0.835611	-1.89198	-1.08037	-0.769169	-1.38077	-1.60821	-2.28999	-1.73286	-1.25812	-2.48327	-2.64	-1.39086	0.918221	-0.499714	-1.20883	-1.51342	-0.707373	-2.42849	-2.98551	-1.50239	-3.15037	-3.75686	-0.669974	-3.15739	-0.803305	-1.26526	-0.150381	-0.749501	-0.376386
267	-1.98772	-2.32892	-2.97675	-1.57593	-1.7829	-2.01702	-0.474769	-0.749651	-0.139883	0.125856	-1.20142	-2.38333	-3.67679	-2.56878	-2.87949	-0.568458	-0.650912	-0.367423	-0.607365	-3.57285	-0.640646	0.377007	-0.761892	-2.60446	-1.86786	-2.73943	-1.5202	-2.03067	-1.8321	0.220329	0.0808221	0.236449	-0.475806	-2.38375	-0.974078	-2.05858	-2.84948	-1.32108	-2.74799	-1.95009	-2.98602	-3.97713	-0.726375	-1.11872	-0.622319	-0.342804	-0.222434
268	-2.22976	-2.64464	-2.30639	-3.2831	-0.832172	-1.45676	0.263478	-0.587205	0.0540925	-0.0362846	-0.509621	-1.90616	-2.35845	-2.31821	-1.09344	0.634166	-0.479135	-0.719784	-2.05421	-2.54199	-1.15088	-1.50168	-1.30778	-2.18245	-2.61647	-1.77829	-2.15757	-0.501742	-0.465525	0.129158	0.993931	0.253499	-2.43088	-1.5617	0.119007	-1.13716	-2.80984	-1.64897	-1.79193	-3.14999	-2.75348	-3.18571	-1.04161	-1.18348	-0.446644	-0.76434	-1.1682
269	-1.78698	-1.10369	-2.54072	-2.13867	-1.83363	-0.869511	-0.687232	-0.118174	0.611809	-0.407932	-1.36975	-2.23762	-3.96672	-2.83726	-1.40521	0.266932	-1.37064	-0.342253	-0.935413	-2.46283	-0.303766	-2.35083	-3.20169	-2.4847	-2.04893	-1.21888	-2.06852	0.598738	-1.33785	-1.00403	0.128193	-0.0707051	-0.754355	-2.33513	-1.48596	-1.53074	-2.05755	-2.96103	-2.48187	-2.32263	-1.68935	-4.76149	-1.23696	-0.700659	-0.482393	-0.206843	-0.375431
270	-1.28151	-2.23017	-3.40615	-1.52896	-2.28969	-1.25472	-1.50416	-1.38197	0.859506	-0.0178148	-1.10842	-2.21816	-2.32615	-1.75403	-1.48133	0.00776054	-1.8934	0.654475	-0.298085	-2.39199	-0.93752	-2.49957	-0.67175	-1.44824	-1.22401	-0.867961	-1.36503	-1.22554	-3.38629	-0.536349	0.228965	0.115992	-1.51971	-2.09231	-0.305786	-1.72277	-2.92049	-2.38189	-2.10644	-1.64271	-2.35574	-3.5556	-0.863395	-1.47206	0.375337	-0.43019	-1.98424
271	-1.8465	-1.14342	-2.88047	-1.18782	-0.810163	-1.777	-0.416183	0.179652	1.55201	-0.322696	-0.577174	-1.21086	-3.28278	-2.23041	-1.95852	-0.366356	-0.917775	-0.164895	-0.787087	-1.63391	-0.402074	-0.700356	-2.44998	-1.04972	-0.457348	-1.39201	-1.89704	-1.41401	-1.03761	-0.139834	0.749914	0.342096	-1.77232	-1.89569	-2.25891	-2.51505	-2.23479	-1.76156	-2.05519	-2.07206	-1.0356	-2.28437	-1.24321	-1.04525	0.0944855	-0.920531	-0.396122
272	-2.01277	-2.17147	-1.66795	-2.72804	-1.3371	-0.892885	-1.54518	-2.10747	-0.474312	0.686306	-1.77973	-1.95287	-2.8662	-2.4179	-1.16623	0.187555	-0.148314	0.113541	-1.65006	-2.01319	-0.661111	-1.62498	-2.06206	-0.74483	-2.98102	-0.899602	-1.22271	-0.418908	-1.67002	-0.570203	0.621253	0.917834	-1.14593	-2.47069	-0.751433	-1.38184	-1.00684	-0.603405	-3.14609	-3.56407	-2.98531	-2.43544	-0.65935	-0.551663	-1.12768	-0.748589	-1.39259
273	-1.75935	-3.01062	-2.83629	-2.03648	-1.57557	-2.74673	-0.142193	-0.749275	0.908723	0.94636	-1.56682	-2.73411	-3.04071	-2.31673	-1.51744	-0.987033	-1.00929	0.727876	-0.228154	-2.06315	-0.0721435	-0.223228	-1.47657	-0.98709	-1.91212	-2.13336	-1.56618	-0.671328	-2.56523	-0.328195	0.664354	1.01943	-0.873672	-2.70224	-1.62999	-1.21173	-2.19546	-1.94906	-2.80498	-2.42503	-0.428962	-3.04963	-1.20102	-0.766109	0.217914	-0.28155	-1.18503
274	-1.63735	-2.05144	-4.14001	-1.14844	-1.62877	-1.78278	0.292107	-1.38212	1.08313	-0.230444	-0.850979	-2.02499	-2.49698	-1.85145	-1.93881	0.794454	-1.44943	-1.20356	-1.15383	-2.38836	-0.244543	-1.81268	-0.384865	-1.88831	-2.18141	-0.866392	-1.55959	-0.0442502	-2.17149	-0.497068	0.310973	0.568898	-0.9729	-2.33106	-0.280116	-1.06317	-0.888351	0.260578	-2.06509	-2.49253	-1.75033	-2.61637	-1.22326	-1.47076	-1.08412	-0.471207	-1.26609
275	-1.22349	-1.88058	-3.09243	-2.12599	-1.93298	-1.74057	-0.159367	-0.738042	0.856583	-0.0728246	0.0306019	-2.30346	-3.0896	-2.35573	-2.07771	-0.348587	-1.3324	0.141935	0.424871	-2.2836	-0.84566	0.0809755	-0.831007	-0.742237	-1.9324	-0.634932	-1.94781	-1.15717	-1.77278	-2.57047	-0.201741	0.639185	-0.517884	-0.750393	-0.48145	-1.11751	-0.688857	-1.9439	-1.38595	-3.5933	-1.11699	-2.71718	-0.848587	-0.838136	0.0911893	-0.102577	-0.713144
276	-2.77382	-2.1126	-2.24494	-1.55597	-2.4411	-2.01388	0.311506	-0.417978	0.70562	-0.977025	-0.573482	-2.26134	-2.91844	-2.4801	-1.83453	0.343612	-0.782452	0.0816369	-0.598327	-2.57881	0.30617	-0.0199199	-2.75247	-1.68371	-0.780409	-2.14177	-1.71669	-0.441761	-0.71251	-0.819128	-0.777312	0.540095	-0.950676	-1.03247	-2.49295	-1.79215	-0.799567	-0.514022	-3.34035	-2.00664	-1.30592	-3.03004	-0.222751	-0.903343	-0.407221	-0.821182	-2.13789
277	-2.47611	-3.71567	-2.35465	-2.08108	-2.60898	-1.59493	-0.599248	0.0181618	1.28527	0.159445	-1.10043	-1.9021	-1.78827	-2.23728	-1.48844	-0.497208	-0.768394	0.381567	-0.48125	-2.18286	-0.118257	-0.770074	-1.6939	-1.62505	-2.13612	-1.67872	-2.3011	-1.78809	0.354582	-2.44277	-1.38513	1.97603	-0.435344	-2.48843	-0.219584	-2.04239	0.108219	-0.89547	-1.01474	-1.96592	-3.55804	-3.7923	-0.835334	-0.602912	0.349975	0.0906391	-0.464404
278	-1.098	-3.61862	-2.49463	-2.04789	-1.59859	-2.24854	-0.0720549	-1.7586	0.732854	-0.527691	-0.556518	-2.6514	-2.65768	-1.93808	-1.5431	0.088436	-1.14442	-0.250246	-0.301412	-1.65348	-1.74681	-1.11235	-2.68657	-1.79378	-1.22026	-2.70335	-2.04409	-1.25941	-0.762745	-1.08045	-0.332199	1.5791	-1.13537	-1.76569	-0.401438	0.164177	0.0179986	-1.62888	-2.10328	-3.08218	-2.88836	-4.00138	-0.960846	-0.799519	0.18871	-1.46222	-0.13515
279	-0.542872	-3.82738	-3.47701	-1.65698	-0.906691	-2.54887	0.586386	0.221126	-0.386823	-0.558294	-0.257869	-1.73471	-2.46359	-2.53526	-2.25011	0.487178	-0.336203	0.581351	-0.0714715	-2.11855	-0.646259	-1.03646	-1.05998	-3.36753	-1.56849	-2.54503	-2.02981	-2.1043	-0.135681	-1.58855	0.500396	-0.0391705	-1.20591	-2.46	-1.07203	0.026054	-0.442408	-0.652171	-1.77434	-2.5622	-0.979023	-3.10057	-1.11404	-0.288418	0.0799931	-0.0636563	-0.79248
280	-1.97285	-2.06028	-1.97013	-2.10771	-1.6782	-0.858305	-0.867377	-0.563528	1.16876	0.886984	-0.575029	-1.96869	-1.78931	-1.84645	-1.42774	-0.687839	-0.802922	-0.230681	-0.553153	-1.73307	-0.730622	-0.718355	-1.7055	-1.24831	-2.2242	-1.19357	-0.532778	-0.789524	-2.16193	-0.327296	-0.743891	0.665455	-1.32383	-0.0773706	-0.207632	-0.973168	-2.13697	-0.143966	-2.54504	-2.37871	-1.06479	-2.97468	-0.909065	-0.429133	-1.27276	-0.720654	-0.959545
281	-0.831908	-2.66545	-3.52372	-1.41113	-2.04051	-1.71376	-1.45988	0.397793	0.807943	-0.585033	-1.21828	-1.44348	-2.43292	-0.932911	-1.08392	0.484595	-0.333731	0.568588	-1.27076	-2.09687	-0.507092	-1.44964	-1.20664	-0.145777	-1.7357	-1.57465	-1.53369	-1.79191	-2.92912	-1.21327	0.481108	0.845571	-0.905154	-2.00186	-1.96812	-1.06316	-0.605575	-0.783917	-1.58415	-2.25791	-1.28789	-3.19504	-0.725776	-0.836889	-1.3815	-1.06867	-0.807872
282	-1.38448	-0.686122	-1.75419	-2.11028	-0.754587	-1.90557	-0.330514	-1.13761	1.09066	0.540211	-2.22419	-2.62797	-1.99416	-2.2627	-1.20319	-0.342696	-0.62873	-0.563155	-0.246363	-2.05038	-1.62291	-1.17135	-0.958966	-1.11062	-2.88079	-1.7347	-1.07873	-2.77654	-3.07381	-2.19376	-0.101207	0.686735	-1.9622	-1.56617	-1.57654	0.272116	0.322757	-2.66252	-1.81802	-3.0617	-0.402151	-2.91566	-1.37803	-0.195201	-0.684167	-0.233377	-1.07409
283	-0.90969	-2.42709	-0.546472	-1.37189	-0.982739	-1.67758	-0.476346	-0.469105	1.04044	-0.0665434	-1.38553	-1.66705	-2.36912	-1.58512	-1.29514	0.485098	-0.485203	-0.47304	-0.719666	-2.5374	-0.471748	-0.843173	-0.940908	-0.910797	-1.5232	-0.624607	-2.05412	-1.03566	-0.404552	-1.93933	0.829487	2.12116	-1.53925	-2.93148	-1.53718	-0.899298	0.515381	-0.85891	-1.34668	-2.46333	-1.55065	-2.38695	-0.770732	-0.708082	-0.603075	-0.288007	-0.230933
284	-1.74824	-2.60968	-2.62928	-2.38547	-1.26983	-0.940854	0.398156	0.881602	1.93796	-0.831194	-1.55514	-2.49987	-1.99752	-1.7037	-1.13382	0.474487	-0.854256	-0.0502234	-1.73989	-2.12297	-0.715824	0.164725	-1.24724	-1.33777	-0.649119	-0.562276	-0.649461	-1.45323	-0.0185845	0.24489	1.97185	0.946596	-1.87625	-1.99398	-0.377357	-0.834952	-0.0193445	-1.79721	-0.744577	-2.24408	-1.16819	-2.694	-0.397538	-0.175787	-1.68123	-0.726854	-1.19618
285	-1.49373	-3.14626	-1.32729	-2.48971	-1.29462	-2.67505	-0.679294	-0.528888	0.675294	-0.133412	-0.320134	-0.232842	-2.50439	-0.952735	-0.930524	0.511502	-0.536975	0.693277	0.300101	-1.78723	-1.13129	-2.28782	-2.07848	-0.351045	-1.02293	-1.04072	-2.24132	-1.31909	-1.13167	-1.21159	2.57395	1.19634	-0.813177	-2.38438	-0.243748	-0.652786	0.410919	-1.61926	-2.21344	-2.37937	-1.98362	-4.02873	-0.797701	-0.232993	0.0252535	0.0652325	-0.940386
286	-1.19026	-1.52405	-2.30169	-1.41785	-1.22448	-0.122575	-1.63754	-1.59696	0.563257	0.154541	0.0946629	-2.08349	-1.50645	-0.671852	-1.19935	0.64378	-0.443473	-0.498166	-1.24942	-1.1823	-0.347553	-1.58001	-0.454555	-0.643371	-1.61875	-0.685838	-2.69617	0.44939	-0.777654	-0.577423	1.80681	0.815404	-1.09894	-2.61038	1.43853	-0.535623	-0.838536	-0.893199	-1.89104	-2.36939	-2.59034	-2.02017	-0.827116	-0.436561	-0.687966	-0.334393	-0.99518
287	-1.09123	-1.22133	-1.7969	-1.74727	-1.68037	-0.705139	-0.468526	-0.632353	1.0746	-0.496408	-1.18096	-1.42902	-2.29184	-1.86282	-1.02258	-0.480301	-0.4831	0.0971643	-0.616382	-1.40217	0.20678	-1.15654	-1.67221	-0.780756	-0.601461	-1.79254	-0.9735	-0.992395	-1.70773	-0.468924	2.18582	1.12532	-0.273394	-0.786428	-0.382927	-0.614148	-1.98271	-2.72408	-1.33347	-0.700258	-1.60396	-2.8461	-0.622151	-0.749591	0.0257968	0.242711	-0.0296458
288	-1.37565	-1.59073	-2.04494	-2.1406	-1.90879	-2.57951	-0.598225	0.952033	0.980975	-0.331971	-1.15681	-1.05919	-2.04989	-0.8984	-0.572352	-0.0306209	-0.76238	0.507205	-0.131071	-1.39094	-0.315171	-1.40595	-1.68669	-1.38678	-1.49841	-0.982373	-1.64481	-1.17676	-1.20375	-2.01802	2.63033	1.20934	-0.383658	-2.21536	0.211082	0.32226	-0.145032	-0.741186	-1.16875	-2.30909	-0.373188	-2.17229	-0.671378	-0.255304	-0.0867384	-0.614993	-2.22439
289	-2.10308	-3.16352	-2.44402	-0.907611	-1.7162	-0.968016	-1.84107	-0.563947	1.87582	-0.0577906	-1.1159	-1.78922	-2.07263	-1.63037	-0.197401	0.438873	-0.62534	-0.157716	0.142317	-0.544835	-0.00877716	-0.231163	-1.46568	-1.48513	-0.685704	-1.44061	-0.633849	-2.13034	-1.21822	-0.829719	2.147	0.579336	-0.540556	-1.97974	-0.373725	-0.726307	-1.30216	-1.62747	-1.97156	-1.90483	-1.90389	-2.30126	-1.06937	-0.829242	-0.561149	0.11636	-3.25759
290	-1.17472	-0.958253	-1.94965	-2.4913	-1.03843	-2.73756	-0.410469	-0.68613	1.33966	-0.209463	-0.623173	-1.43279	-1.66732	-1.18238	-0.678902	0.121953	0.068951	0.492106	-0.408781	-1.86517	-0.330924	-0.508456	-1.58523	-2.11652	-2.0213	-0.947288	-1.21926	0.183271	-1.84801	-2.13546	1.57038	1.04891	-0.702217	-1.4214	-0.133636	-1.49952	-0.660398	-0.367451	-2.50757	-1.13509	-1.31426	-2.84162	-1.47992	-0.908843	-0.117962	-1.0077	-0.361861
291	-1.57866	-2.79391	-0.942493	-1.58517	-0.364263	-0.941622	-0.307327	-1.36709	0.118729	0.562228	-1.77137	-2.23099	-1.63208	-1.52773	-1.05734	-0.0192202	-0.73824	-0.650737	-0.404315	-1.64539	-1.05935	-1.22274	-1.95207	-0.878557	-1.68472	-2.2307	-0.309873	-1.62375	-1.42908	-0.350159	1.61082	-0.478483	-1.04437	-4.07535	-0.0297518	0.0974417	-0.699543	-1.81282	-1.45404	-2.04465	-1.99955	-1.6776	-0.605194	-1.11232	0.237683	-0.605357	-0.0800662
292	-2.06415	-0.547974	-2.49426	-1.43519	-0.409719	-1.47083	-0.951781	-1.38216	0.579774	0.0320348	0.278862	-0.987676	-1.61553	-0.848696	-1.17199	-0.581183	0.179828	0.0464609	-0.467519	-2.68419	-0.315632	-1.60395	-1.88553	-0.85478	-1.01247	-0.351575	-0.896205	-2.16016	-3.59207	-0.750813	1.72956	-1.1491	-0.60287	-3.56616	-1.25941	-1.28172	-0.475562	-1.78884	-0.200785	-2.56781	-0.768081	-2.18451	-0.088647	-0.729684	0.28316	-1.02963	-0.386751
293	-0.951295	-1.15755	-1.28033	-2.1753	-1.47164	-0.15265	-0.189466	-1.40758	0.126693	0.223958	-0.173653	-1.13342	-2.37123	-0.662407	-1.17192	0.539342	-0.677356	-0.443951	-1.41932	-1.55487	-0.479671	-0.347665	-1.63207	-0.780923	-1.5679	-1.88301	-2.14351	-0.764062	-0.320607	1.71013	1.23195	0.60509	-0.765783	-2.28869	-1.29385	0.029324	-0.196739	-0.405615	-0.181815	-1.43111	-0.123349	-2.0578	-0.523507	-1.56868	-0.731557	-0.276887	-1.14633
294	-0.290978	-2.12389	-1.89023	-1.66202	-0.415483	-0.660346	-2.05204	-0.743464	0.890121	-0.0711116	-0.191414	-1.64867	-1.31848	-0.652276	-1.48368	-0.047282	-0.48113	-0.313334	-0.073276	-1.26035	-0.642661	-1.30718	-0.478517	-1.91756	-2.37331	-1.20819	-0.363367	-1.88609	-2.32701	-0.10157	1.09311	-0.244546	-0.5801	-2.33823	-0.111402	0.22436	-0.303832	-0.536899	-1.38749	-1.11052	-2.39131	-2.2194	-0.537682	-0.866539	-0.865524	-0.807134	-0.220624
295	-1.12218	-1.30553	-1.85676	-1.99235	-0.216092	-2.00038	-1.59117	-0.986822	1.54346	0.783173	-0.582264	-0.735331	-1.84492	-1.49896	-0.394224	0.24595	-0.511483	-0.179394	-0.0595811	-1.36849	0.693935	-1.23252	-0.68655	-1.0746	-1.23055	-1.02449	-0.93955	-0.556252	-2.04953	-0.736291	0.412114	-0.091807	0.00312955	-6.19369	-1.76449	-0.374685	0.242363	-1.27878	-1.39085	-1.6243	-1.84372	-1.64778	-1.01374	-0.661245	-0.307858	-1.02305	0.0347506
296	-1.16167	-1.54636	-1.00149	-1.72608	-1.44485	-0.404401	-0.422946	0.475757	1.24305	-0.177969	-1.14244	-1.11765	-2.76607	-0.838846	-0.664188	0.235791	-1.09651	0.426889	-0.528004	-0.859583	0.149568	-0.898677	-1.14598	0.0308538	0.194305	-0.717021	-0.015161	-1.6486	-1.17433	0.26322	0.245854	0.683068	-1.35683	-3.67125	-1.77515	-0.808765	-0.978168	-0.854395	-1.55492	-1.83342	-2.13749	-2.98621	-0.243025	-0.0946513	0.0918276	-0.223683	-0.0863136
297	-1.69322	-2.08946	-1.49379	-1.13403	-0.944133	-1.16067	-2.67172	-0.319553	2.12391	0.0621028	-1.62452	-0.727087	-1.52063	-1.60895	-0.73925	-0.292401	-0.845382	-0.428878	-0.396855	-1.68503	0.173702	-0.555087	-1.6324	-0.547108	-3.17733	-0.176587	-1.02032	-1.03503	0.391758	-0.664416	0.42892	0.796373	-1.36637	-4.92987	0.0126968	0.262259	0.911177	-0.763734	-1.56225	-2.20997	-2.2161	-2.23823	0.12655	-0.136048	0.300744	-0.802773	-0.902253
298	-1.36136	-1.44473	-2.25397	-1.40235	-0.92385	-0.401616	-0.479596	-1.08939	1.16021	-0.154751	-0.532671	-1.40625	-1.72328	-1.00644	-0.294852	-0.409	-0.617978	-0.8991	-0.324492	-2.20021	-1.26176	-0.629114	-1.07547	-0.714086	-1.37889	-0.743474	-0.887133	-1.51884	-1.43448	0.361963	1.55303	0.760853	-1.47328	-3.86228	0.349935	-1.57283	0.816364	-0.600681	0.0420213	-2.16243	-1.13997	-2.35126	-0.595261	-0.98159	0.286015	0.760504	-0.963741
299	-0.815964	-1.01541	-1.67825	-0.743551	-1.97858	-1.05428	-0.221714	0.197982	1.65811	-0.164932	1.52455	-2.14751	-1.48191	-1.89802	-0.261942	-0.320981	-1.74741	0.292701	-1.125	-0.904278	-0.444232	0.511111	-1.1047	-1.14746	-0.881474	-0.782664	-1.05928	-0.685633	-0.548826	-0.698364	-1.23184	0.000439069	-1.86365	-4.52657	0.568397	-1.54795	-0.18174	-2.85143	-3.134	-1.47864	-2.82193	-1.52353	-0.416366	-0.411649	0.919659	-0.00386711	-1.05185
300	-0.912122	-0.699292	-1.75308	-1.31275	-1.37657	-0.385442	1.18432	-0.329336	-0.0979738	0.152308	-1.3475	-2.46881	-1.99879	-1.3921	0.0427114	0.471332	0.400617	0.167933	-1.03309	-2.91839	-0.358804	-2.30519	-1.46092	-0.933246	-0.952427	-0.939322	-0.722303	0.0503496	-2.31628	-1.27366	-0.439279	-1.64118	-1.70238	-4.90475	-0.689448	-0.574344	-0.254131	-1.48586	-1.72808	-1.64083	-1.32384	-2.89595	-0.959532	-0.153264	-0.665948	-0.13665	0.208224
301	-1.54068	-2.10001	-1.59182	-0.687671	-1.24886	-0.451193	-0.0185461	-0.271103	0.75539	0.306178	-2.28756	-2.75917	-1.67595	-1.03467	0.138983	0.303407	-1.09654	-0.112874	-0.43915	-1.08605	-0.62479	0.0125571	-1.0003	-0.592901	-1.69178	-1.85488	-1.61562	-0.46456	0.0158018	0.734926	-0.467418	-1.20521	0.434639	-3.51865	-0.220341	-0.191601	0.35244	-1.23438	-1.32668	-2.14249	-0.807986	-3.10577	-0.670916	-0.979992	-0.275561	-0.925682	-0.767789
302	-0.0731796	-2.00835	-1.89549	-1.01021	-0.987046	-0.999162	-0.169192	-1.93583	-0.0696808	0.133539	-0.448654	-1.89686	-1.30877	-1.46078	-1.96579	0.280796	-0.864573	0.474312	-0.0695534	-1.47542	-0.834706	-0.882037	-0.176253	-0.883804	-2.26018	0.340485	-1.03107	-0.214581	0.0137646	1.12008	-0.386536	-0.496322	-1.43566	-2.54094	0.326137	-1.25897	-0.189421	-0.404714	-2.889	-2.09576	-0.804972	-2.00724	-0.579069	-0.891912	-0.691962	-0.804236	-0.362919
303	-1.50976	-1.61947	-1.12394	-0.448702	-0.571048	-0.21339	-1.18715	-2.02261	1.91739	0.325677	-1.15639	-1.59469	-2.03658	-1.20429	-0.966779	0.458108	-0.341493	0.297883	-0.634228	-0.676723	-0.464532	-1.91429	-1.27466	-1.52003	-2.84597	-0.410165	0.169898	0.62099	-1.05673	-0.677603	0.628838	-0.518581	-0.275517	-2.96708	-0.505382	-1.03678	-0.902153	-0.884035	-0.0961459	-2.18979	-1.01599	-1.10115	-0.653581	-0.783828	-0.155317	0.0785951	-1.21776
304	-0.899589	-1.1254	-1.78089	-0.485382	-0.817421	0.340684	0.310299	-0.62252	0.667155	-0.549826	-0.627954	-2.76533	-1.86855	-1.59445	-1.43357	-0.242627	-1.1625	-0.708973	-1.7137	-2.02182	-0.794334	-1.78805	-1.67784	0.0410474	-1.49146	0.0143019	-2.04873	-0.4287	-0.802637	-0.244216	0.231971	-0.859309	0.358183	-3.20625	-0.786155	-1.07204	0.758867	-0.470779	-1.24742	-1.70214	-0.968249	-1.85348	-0.363245	-0.478433	0.870366	-0.235467	-0.38377
305	-0.60494	-1.29868	-1.85415	-0.187964	-0.420264	-0.339936	-0.629718	0.0980535	0.0514511	-0.0309562	-0.505829	-0.920232	-1.84076	-1.05012	-0.731288	-0.713768	0.477965	0.523646	-0.267237	-1.82742	-0.168362	-1.2788	-1.42793	-0.833629	-0.486693	-0.646809	-2.01289	-1.20453	0.288233	0.136233	0.696505	-0.326853	-0.385195	-2.67779	-0.699473	-0.707543	0.724698	-2.47327	-1.14769	-1.49991	-0.360414	-1.45691	-0.127453	0.120969	-2.42532	0.338647	-0.0418258
306	-1.36506	-2.50934	-1.92796	-0.260218	-0.397215	0.622963	0.711103	-2.80608	0.337841	0.315165	-0.506328	-0.770591	-2.07325	-1.17903	-1.30704	-0.344947	0.112008	0.854034	-1.12712	-2.47583	-0.39357	-0.372339	-0.336062	-0.929099	-1.34386	-0.634648	-1.65653	0.508978	-0.447903	-0.553169	0.65832	-0.814974	-0.209016	-3.35578	0.0298227	-0.836054	-0.0503333	-0.61347	-0.0761639	-1.9925	-2.08927	-0.794948	0.0792821	-0.253053	0.0582187	-0.700775	-1.34492
307	-1.5333	-0.679061	-1.6557	-0.929074	-1.01013	0.753965	-0.642873	-1.33001	0.0569888	0.915003	-1.28543	-1.70307	-1.6326	-0.713257	-0.828598	0.707812	-0.0828907	0.950353	-0.347865	-1.66554	0.113857	-1.6106	-2.08648	-1.23542	-0.944517	0.0516847	-1.22219	-0.0921608	-1.84252	0.786321	0.122773	-1.14906	0.0215641	-3.33877	-0.432326	-0.607454	-0.873081	-1.29293	-1.10706	-1.15463	-0.558623	-1.33933	-0.198368	-1.77993	0.53676	0.52875	-0.845306
308	-0.797637	-2.72799	-1.09602	-0.888542	-0.743511	-0.777169	-0.00331783	0.757864	0.349928	-0.633621	0.549573	-1.56359	-2.26372	-0.187965	-0.789248	0.696564	-0.875841	0.557693	-0.670812	-0.909183	-0.888894	-1.02521	-0.668689	-0.436987	-0.318332	0.16004	-0.624565	0.463341	-2.01338	-1.43424	-0.511818	0.647805	-0.212077	-2.00308	-1.77643	-1.46993	0.806077	-2.05863	-0.121303	-0.598875	-1.25476	-0.8392	-0.438738	-0.574877	0.859271	-0.498892	-1.83427
309	-1.26854	-1.80903	-2.09186	-0.0776883	-0.462423	-0.291748	-1.27451	0.0918624	1.00004	-0.180209	-0.185027	-1.25011	-0.568807	-1.05342	-1.11868	-0.0134279	-0.999375	0.281694	0.366426	-0.7115	0.158969	-0.526757	-1.03261	-0.0776901	-1.06088	-1.66422	-0.670801	-0.102098	0.724036	-0.224925	-0.541581	-0.346696	-0.840237	-1.05169	-0.114907	0.127918	0.599842	-1.7268	-1.34162	-0.596479	-0.441906	-1.96343	-1.09956	-0.628665	0.755511	-0.642114	-1.32111
310	-1.09187	-1.52445	-1.4393	-1.47968	0.196807	0.135039	-0.549868	0.405822	0.587557	0.47002	-0.105401	-1.33987	-0.713503	-0.974451	-1.24933	-0.247377	-0.661355	0.115814	-0.180876	-0.475311	-0.686565	-2.02738	0.394205	-0.379706	-1.82139	-0.0679914	-1.53486	0.343767	-1.47761	-0.120765	0.166887	-0.597309	-0.463006	-0.954376	-0.156942	-0.894274	0.26205	-1.7622	-2.90009	-2.01556	0.573343	-1.57236	-0.86019	0.0656924	-0.0391378	-0.901146	-0.46099
311	-1.40893	-1.46719	-1.62335	-0.354546	-0.503568	-0.938096	-0.317447	-1.4518	0.830174	-0.899455	0.158625	-1.87676	-0.302266	-0.828832	0.566008	-0.968653	-0.572099	0.271371	0.168938	-1.91388	-0.219058	-0.216276	-0.188573	-0.674948	-2.03541	-0.477538	-0.351544	0.249458	-2.15426	0.741051	-1.85111	-0.657204	-0.423075	-0.483554	-0.416192	-2.28511	-0.252489	-0.0886789	-1.57687	-1.33117	-0.194358	-2.05686	-0.666926	-0.231443	-0.384006	-0.143517	-1.55679
312	-0.660122	-1.24254	-0.591086	-0.138494	-0.159371	-3.14985	-0.0653287	0.245191	1.00553	0.275528	-1.00827	-1.64696	-0.241449	0.183261	-0.45753	0.0567797	0.517529	-0.927149	-1.54679	-0.486503	-0.627858	-2.25647	-1.20766	-0.902949	-0.376632	-1.35525	-0.384334	-0.782858	-2.14091	0.480924	-0.472169	-1.16862	-0.402809	-2.49801	-0.818335	-1.81637	0.252142	-1.55536	-1.54226	-1.61029	0.244378	-0.915422	0.0887792	-0.403142	0.108034	-0.0610091	-0.412045
313	-0.499622	-0.240397	-0.457621	-1.0368	-0.840485	-0.952693	-1.02306	0.126625	0.202239	0.565653	1.64299	-1.91879	-1.08737	-0.867411	-0.0416619	-0.308482	-0.518019	0.269572	-1.41093	-1.22396	0.0246714	-0.536563	0.178798	-0.991858	-0.846915	-0.0629317	-0.227876	-1.06279	1.20133	-0.596786	-0.699725	0.615273	0.221042	-0.774232	-1.25847	0.559505	0.0236958	-0.329127	-1.92165	-1.00709	-2.09322	-0.726891	0.231537	0.0817815	0.0537612	-0.0913516	-0.561928
314	-1.55807	-0.7798	-0.343423	-0.60032	-0.0851812	-0.476612	0.298668	-0.199263	1.86097	-0.394878	0.511256	-2.31618	-1.09622	-0.33073	-1.16687	-0.021244	-0.109302	1.07254	-1.64894	-0.831815	-0.412375	-1.49141	-0.23719	0.14065	-1.18098	0.549972	-0.649163	-0.214029	0.838344	-0.509376	0.559711	-0.314004	-1.59805	-1.36527	-1.27107	-0.41903	1.3792	-1.27974	0.55512	-0.0834843	-1.71553	-2.4302	-0.81242	-0.659663	-1.37671	0.19558	0.0103296
315	-0.653899	0.0255064	-1.47131	-0.797439	0.130581	-0.321628	0.697741	-0.824613	0.53856	-0.344551	-0.260855	-1.42335	-1.0545	-0.35017	-0.898045	0.335189	-0.475014	0.324589	0.152318	-1.40878	-1.47941	-0.453697	-0.335331	0.236348	-0.699667	-0.842313	-1.30768	-0.684762	-0.14219	-0.276714	-1.22039	0.613335	-0.183413	-2.404	0.0476456	-0.544752	-0.121277	-0.535523	-0.200307	-1.17295	0.745248	-0.954485	0.0834728	-0.997314	0.35954	0.55029	-1.21341
316	-1.65201	-0.313687	-0.685717	-0.733192	-1.38151	0.39774	-0.280328	-0.338552	0.319484	0.0616273	0.0968576	-1.74529	-0.617475	-0.945995	1.03308	-0.235977	-0.455768	-0.367227	0.993298	-0.741297	-0.593582	-1.30994	-0.190674	-1.35244	-0.672251	-2.45832	-0.354849	0.15487	-0.0357219	0.0441703	0.494736	-0.0456916	-0.605416	-2.43643	-0.930701	-0.507957	-1.89072	-0.152876	-0.0712293	-1.09015	-2.39495	-0.666179	-0.55896	-1.29226	-0.0061928	-0.536276	0.244472
317	-1.39063	-0.116103	-0.764389	-0.921268	0.370156	1.05109	-0.325999	1.03907	0.0641759	-0.823677	-0.213865	-1.11338	-1.25102	-0.685128	-0.457769	0.648683	0.128849	0.675672	0.25553	-0.819506	0.175059	-1.21286	-1.11004	0.446592	-1.92795	-0.346453	-1.52838	-0.911363	-0.536962	-0.127097	-0.907246	-0.663542	0.094869	-3.54393	-1.39696	-2.39192	-0.200673	-0.843923	0.119195	-1.48085	-1.45012	-0.812419	-1.37926	-0.321665	0.462016	-0.611443	-0.00472072
318	-0.908454	-0.331875	-0.546472	-1.10513	-1.56771	0.206402	-0.225232	0.0973144	-1.16441	0.893151	-1.1635	-2.89748	-0.0559411	-0.0236528	-1.00708	0.439336	-0.226613	0.222334	0.30453	-1.30693	-0.0739095	-0.732727	0.173406	-0.10588	-0.456363	-1.71605	-0.678781	0.766911	-0.289723	0.669316	-0.0539785	-1.5482	0.785371	-2.61756	0.0601571	0.472322	-1.2427	-1.92595	-0.917139	-1.7892	-1.18749	-0.936609	-0.159382	-0.635589	0.186788	0.114673	0.228782
319	-0.517602	-1.97347	-1.33181	-0.248852	0.244034	-1.90059	-0.775466	0.882246	-0.466668	0.473897	-0.481881	-1.37226	-1.62745	-0.894197	-0.186439	-0.633483	0.590472	0.857311	-0.972491	-0.638348	0.116736	0.00323166	-0.38342	-0.32105	-0.50153	-0.45421	-0.360655	-0.524923	-1.7753	0.220939	-0.230728	-0.899798	-1.09954	-1.68831	-0.202304	0.364994	0.201687	-1.80692	0.811097	-1.795	-1.01155	-0.998802	-0.107832	-0.321208	0.0522604	-0.486323	-1.22192
320	-0.57281	-0.523398	-1.29303	-0.148102	-0.169358	-0.910642	-0.206035	0.186097	0.718714	-0.0722536	-0.185627	-0.567398	-1.68132	-0.26736	0.287157	0.503934	-0.480724	-0.106682	-0.37178	-0.972629	0.547503	-1.3169	-0.807606	-1.8397	-0.0227007	-1.02797	-1.14621	-1.16696	-1.07147	-0.503361	0.726455	0.618086	0.530638	-2.5046	-0.558554	0.0962783	-0.705836	-2.08005	0.327738	-1.70106	-2.2598	-0.44797	-0.00270968	-1.98192	-1.49452	0.0343799	-0.922284
321	-1.24995	0.2524	-0.501077	-0.51146	-0.0561135	-1.04515	-0.0536428	-0.0707933	-0.889888	0.31403	-0.543092	-1.58466	-0.778464	0.159867	-0.623245	-0.352639	-1.30274	-0.805512	0.381154	-0.19345	0.41519	-0.322958	0.487501	-0.497084	-0.318152	-0.188316	-0.278793	-0.451004	0.154632	-1.45952	-0.629887	0.432088	-0.325231	-1.622	-2.11836	-1.47322	0.762027	-1.80345	-0.848696	-3.10065	0.138012	-0.471206	-0.134595	-0.424237	0.0677487	0.213562	-0.00699367
322	-0.166687	-0.25962	-0.538625	-0.753036	0.721908	-0.477313	0.0952643	-1.17975	0.721492	-0.623827	-0.481482	-1.55952	-1.6127	0.312143	-0.194292	0.413863	-0.52788	0.466951	0.568011	-1.31748	0.423587	-0.766533	-1.03668	-0.108635	-0.766504	0.492824	-0.3321	0.0293174	-0.160542	0.240195	-0.296326	0.796678	-1.19499	-1.11772	-1.57366	-0.475602	0.612364	0.223139	0.763709	-2.21371	-0.0375607	-1.27116	-0.58312	-0.821288	-0.299412	-0.350566	0.000722054
323	-0.0577539	-0.0666918	-0.441267	-0.487226	-0.659218	-0.204297	-0.490601	-0.0382513	-0.222686	0.802337	-0.885478	-0.908581	-1.14998	-0.358846	-1.27626	-0.462443	0.170863	0.668594	0.476562	-1.84941	0.0644992	-1.94448	-0.608805	-0.379472	-0.154613	0.644412	0.082733	0.741748	-2.22341	-0.105437	-1.12992	-0.617238	0.577755	-1.48915	0.166549	-0.360941	0.742224	0.306695	-1.92321	-0.750903	-0.233281	0.041287	-0.622881	-0.714684	0.654861	-0.253605	-0.221815
324	0.255227	-0.693089	-0.441781	0.299481	-0.411652	-1.53892	0.534876	0.112583	-0.457521	1.57789	0.20642	-0.870424	-1.01573	-0.720863	-0.62289	-0.160042	-0.0115123	-0.29868	-0.28773	-0.472859	0.455382	-0.0643781	-0.446817	-0.780606	-0.958968	0.533237	-1.22673	-0.587949	0.0589667	-0.196322	0.51606	0.60537	-0.190471	-0.960179	-0.666781	-0.663338	0.918137	0.407543	0.130289	-0.948901	0.177967	-2.31183	0.273926	-0.0921991	0.916616	-0.853946	0.734777
325	-0.524671	-0.263533	-0.576018	-1.46673	-0.21226	-1.54444	-0.0739268	-0.713741	-1.31929	-0.946797	-0.572683	-1.9378	-1.08951	0.453215	0.399109	-0.952115	-0.288805	-0.176325	-0.460106	-0.87342	-0.222141	-1.22912	-1.05217	-0.173146	-0.225918	-0.514311	-0.414789	1.78866	-0.675135	-0.773548	-0.379142	-1.30491	0.021198	-1.81698	0.211436	-0.26512	-0.551794	-0.338718	1.28757	-0.976275	-0.659066	-1.64835	-0.544064	-0.821906	0.0104078	0.0247421	-0.338795
326	-0.902065	-0.145144	-1.34873	-0.742281	-1.74672	-0.39265	-0.6376	-0.735336	0.090244	0.799634	-0.142283	-1.38161	-0.85595	-0.40349	1.07011	-0.153076	0.479844	-0.244115	-1.14882	-1.08535	-0.298726	-1.58126	-0.737268	-0.675608	0.459139	-0.40373	-0.231527	-1.56561	-1.90025	0.849557	-0.298567	1.36068	0.62913	-2.02921	-0.363087	-1.25542	0.182387	0.463764	0.743551	-0.579031	-1.9651	-1.5155	-0.0985525	-0.310404	-0.0595768	0.429905	0.0489681
327	0.231225	0.420649	-0.977952	-0.717089	0.549132	-1.22957	0.184987	0.789404	0.329699	-0.314608	0.750535	-1.06881	-0.899178	-0.153216	-0.680678	0.0475478	-0.536673	0.439971	-0.948982	0.143447	-0.551621	-0.35978	-0.0311829	0.0356806	-1.01383	-0.0958804	0.0376634	0.293729	-1.28661	0.638097	-0.325186	-0.13707	-0.765584	-2.44704	-0.916684	-1.8347	0.297236	0.351801	0.700543	-1.5085	1.60182	-0.212233	-0.277034	-0.742928	-0.208799	-0.114567	0.342148
328	-0.0897269	1.1307	-0.360166	-0.207982	0.481855	0.594608	0.43658	-0.325057	0.977908	-0.792847	-0.30337	-0.559488	-1.09258	-0.27185	-0.309353	0.675605	-0.303923	0.0717435	0.0338587	-0.816336	-0.0299389	-1.06999	0.40558	-2.48532	-0.682279	0.484278	-0.0530379	1.2764	0.577198	-0.369779	-1.05054	0.191257	-0.88458	-2.65115	-0.229118	-0.554815	-0.287888	0.468662	-1.1582	-2.20404	-0.331946	-1.01973	-0.552623	-0.413495	-0.791751	0.0168406	-0.04361
329	-0.222948	0.0213152	0.199747	-1.83068	0.257033	-1.78187	0.0480536	-0.266419	-0.401587	0.395436	-0.320333	-0.92066	-1.32972	-0.33041	-0.548966	-0.686588	-0.0948715	-0.0429223	-0.664785	0.0953225	-0.873931	-0.859066	-0.473866	-1.56947	0.0245084	-0.830041	0.0259171	0.10452	0.359691	0.436727	-1.30254	-0.483086	-1.02879	-0.409675	-2.55526	-0.840708	-1.0808	-0.0357287	0.711566	-0.444615	2.23072	0.716591	0.000827915	0.0248237	-0.0407047	0.295783	-0.190034
330	-1.06671	-0.99844	0.142811	-0.678056	0.849119	-1.97317	-0.232056	1.10035	0.604012	-0.143046	0.0124461	-2.058	-1.94301	-0.10789	-0.771521	0.25051	0.157379	-0.260331	-0.109433	-0.35102	-0.830333	-1.42366	0.43784	-1.03198	0.386147	-0.0630843	0.337472	-0.447706	0.390482	-0.512579	0.744048	-0.496599	-0.528714	-2.11046	-0.396634	-1.12952	-0.640578	1.32975	-0.358314	-1.9647	1.38376	-0.632221	-0.0525089	0.0155309	-0.301696	0.0570609	0.198109
331	-0.653439	0.236737	-0.864647	0.759683	-0.122605	0.807536	1.12437	0.43446	0.947845	0.148502	-0.0900896	-0.514382	-0.874411	-0.769323	0.0449847	0.0769798	0.243583	0.3906	0.266175	0.107831	-0.690936	0.769448	-0.192874	-0.457693	-0.49922	-0.0914563	-0.0725667	0.260401	-0.790215	1.81518	-1.55958	0.147478	-0.371926	-2.51541	-0.421679	0.032901	-1.20001	-0.626104	0.929847	1.29098	0.257537	-1.55609	0.226366	-0.908391	1.02463	0.707548	-0.500336
332	-0.120852	-0.12253	-0.592864	-0.352469	0.52272	-1.91771	0.649312	0.310583	-1.60099	0.475733	0.373257	-1.27948	-0.927231	-0.996501	0.166928	0.284103	-0.545677	0.801353	-0.129912	-0.453241	0.350118	-0.584971	-0.430284	-0.194021	-0.209217	0.285815	0.153914	0.744902	1.83553	-0.120639	-1.14167	-0.584399	0.348534	-1.62866	0.380217	-0.967828	0.762793	-0.685175	-0.672526	-0.834325	1.19762	-0.602923	-0.102824	0.235895	0.254539	-0.470872	-0.497498
333	-0.600168	-0.495183	-0.395901	0.362907	0.246475	-0.453595	0.273529	0.14462	0.574908	0.0698107	-0.936691	-1.19001	-0.637787	0.0546533	-0.193442	-0.729743	-1.18476	-0.251028	0.597265	-0.676291	0.284466	-0.0380291	-0.099499	0.174065	-1.40699	-1.19359	0.174243	-0.183767	1.17695	-1.48764	0.404784	-0.927994	0.601519	-0.466667	-0.284277	-0.226664	0.0438857	-0.47605	-0.890195	-0.700509	1.28877	-1.45626	-0.268482	-0.131938	0.288808	0.0111555	-1.21413
334	0.391831	-0.298057	-0.531121	-0.813905	0.198	0.305379	0.486505	0.23071	0.402992	0.986896	0.110029	-0.206848	-0.0967995	-0.300203	0.426973	-0.800154	-0.0170802	-0.777254	0.0432175	-2.11343	0.645297	-1.10313	-0.899613	-0.624911	0.189429	-0.141473	-0.329772	0.768144	-0.81342	0.783901	-0.389221	0.0775626	1.19778	-0.448593	-1.41226	-0.346456	-0.483502	0.308492	0.521371	0.571565	0.160871	-1.91294	-0.618374	-0.467564	-0.391613	0.243063	0.898342
335	-0.992881	0.84348	0.262518	0.319967	-0.0220341	0.819628	0.210695	-0.468457	0.986319	0.912486	0.152892	-0.484133	0.427628	-0.22826	0.0712099	0.92658	-0.512951	-0.0614748	0.048283	-0.916229	1.07289	0.10716	-0.572298	0.834932	0.272498	-0.0696763	-0.101266	-0.472642	-1.07372	0.419978	-0.662036	0.144838	-0.295248	-1.62423	0.801367	-1.32051	-0.345552	-0.780488	-1.07206	-0.999536	0.181189	-0.855307	-0.039202	-0.45874	-0.0964328	-0.509709	0.993575
336	-0.411155	-0.829914	0.0369781	-1.38092	0.11125	-1.00358	-0.229435	1.29243	0.814145	0.208353	-0.466619	-0.361533	-0.635173	-0.610892	0.211071	0.265254	-1.28947	-0.0660399	1.34983	0.168828	-0.200604	-0.472547	-0.609197	-0.291294	-0.29941	-1.32926	-0.864502	0.337489	-0.271644	0.212715	-1.03963	0.609329	-1.23508	-0.453194	1.07368	0.0532578	0.841664	0.0136242	-0.0538793	-0.529831	1.06341	-0.591988	-0.566964	0.126045	0.757604	0.0326797	-0.845308
337	0.230239	0.705507	-0.545899	-1.07567	-0.526511	0.0230463	0.336539	0.783526	-0.714493	1.2931	0.0797918	0.201441	-0.812037	0.0955092	0.077224	-0.509278	-0.221691	-0.331413	-0.457334	-0.300549	0.657365	-1.19895	-0.0265929	0.289324	-0.482466	-1.09637	-0.151109	0.280096	1.12822	0.401307	0.529371	-1.95445	0.467086	0.486525	0.457394	-0.642475	0.230197	0.431898	1.25895	0.672616	0.973149	-1.6282	0.249361	-0.668923	-0.358656	0.558152	0.185104
338	0.105926	0.702959	-0.11743	-0.0367739	0.0741693	-1.80311	-1.4957	0.356358	-0.618608	-0.271807	0.55499	-0.125527	-0.0599213	0.0055925	0.907258	-0.173168	0.531933	0.266012	0.390599	-0.693385	-0.139636	-0.412649	1.26448	0.28107	0.214719	0.883134	-0.333641	-0.186262	-0.291485	1.01425	-0.218278	0.00307903	-0.324435	-0.837899	-0.273813	-0.350386	0.398866	-0.0270479	-0.132733	0.589196	0.558939	-1.4046	0.190418	-0.0264254	-0.480243	0.469898	0.221573
339	-0.283295	-0.658318	-0.220585	0.219392	-0.750684	-0.177351	-1.41795	1.00664	0.75427	-0.150316	0.97742	0.775746	-0.0604346	-0.47116	0.24778	-0.328795	-0.563097	-0.462498	0.539689	-0.0572889	-0.177849	-0.543333	-1.00226	0.253643	-0.000303733	-0.365399	0.733552	-0.249563	-1.79606	0.424645	1.17898	-0.46778	0.106017	0.30339	0.154471	1.0569	-0.0600948	0.0605177	-0.0581485	-0.404276	-0.67434	0.0522923	-0.326497	-0.222132	0.525161	0.0166518	-0.188198
340	-0.404641	0.243744	-0.590598	-0.467103	0.694844	-0.346052	-0.344135	0.566646	0.783378	-0.628422	-0.146412	-1.13456	-0.495076	0.757766	0.604691	0.514084	-0.710493	-0.210702	-0.233632	-0.930182	-0.0819751	0.2213	0.472427	0.6526	-0.867606	-0.306979	0.796526	1.06122	0.711038	-1.184	-0.509236	-0.430251	-0.906022	0.238124	0.0319569	-0.494651	-0.00621923	-0.565668	0.710343	-0.247211	0.741878	0.334854	-0.137519	-0.03858	0.707875	-0.528153	0.270858
341	-0.346947	0.287079	-0.598405	0.55894	-1.20626	0.481052	0.1021	-0.822788	0.482812	0.243274	-0.0910751	-0.927098	-1.03691	0.629824	-0.171171	0.136444	0.399973	0.614536	0.276673	0.967405	-0.998445	0.327002	-0.0949	0.0875528	-0.277269	0.662509	-0.626121	-0.0838759	0.930579	0.834297	0.00269612	0.856489	0.622186	-1.07061	-0.622046	0.107958	0.51385	0.0181433	0.49218	0.923311	-0.599456	-0.985961	-0.781283	-0.224053	0.307176	0.138853	0.20167
342	0.183824	0.312474	0.150834	-0.055036	-0.547356	0.27848	0.296392	-0.979873	-0.0575903	-0.502345	1.13809	0.352044	0.0334281	-0.370212	0.369042	0.140042	-0.0619099	0.721529	-0.450313	0.193905	-0.0281111	0.864042	0.340371	0.292287	0.317707	0.199238	0.066555	-1.28484	0.145989	0.917874	1.04746	0.999281	-1.10934	0.0983654	0.488332	-1.24297	-0.00796825	0.568434	-1.99521	-0.443355	-0.762593	-0.00130419	-0.220601	0.0567139	-0.861472	-0.65473	0.0705145
343	-0.211348	0.931077	0.802917	-0.631955	0.587166	-0.125468	0.0142882	-0.244347	-1.10545	-0.716724	-0.339193	0.0188784	0.960306	-1.02896	-0.940052	0.369566	0.590932	0.435965	-0.0410615	0.0259131	-0.0974278	0.79084	1.10348	0.564305	-0.924507	-0.429686	-0.663098	-0.399293	0.294558	0.115194	0.814031	-0.672996	-0.985614	0.478579	0.62382	-0.494096	0.68866	-0.545181	-0.929064	0.15886	-0.438634	-0.655261	0.252339	-0.0556499	-0.483392	-0.36607	-0.531303
344	0.325286	-1.92828	-0.135016	0.24475	0.36901	-0.655677	-0.364756	0.056531	-0.535964	-0.691531	0.148545	0.191213	-0.227273	-0.282144	0.436215	-0.445696	0.497285	-0.979837	1.11554	-0.751141	-0.266798	-0.245749	-0.00386892	-0.974189	-0.157797	-0.303639	-1.27318	0.615914	0.719771	0.535271	0.394922	-0.861786	-0.349455	-0.41306	-1.14545	0.81267	-1.20998	1.51791	0.119496	0.521076	0.658604	-0.342726	-0.224085	-0.0753033	-0.180793	0.591152	-0.402815
345	1.01596	0.274226	0.0345098	0.307068	0.393894	0.187221	-0.13926	-0.38938	-0.591299	1.10251	-0.50553	-0.307234	-0.168589	0.0634394	0.375583	-0.217546	-0.720849	-0.143556	-0.520209	0.655244	0.5901	-0.842574	-0.619368	0.761313	0.518764	-0.0347048	-0.21788	0.0128514	1.04846	-0.539868	-1.31741	0.644778	-0.248925	-0.799462	0.437417	-0.973744	0.41742	0.0976116	1.82027	-0.393826	0.000636038	0.734134	0.423793	0.227415	-0.24126	0.121176	-0.270968
346	-0.920278	-1.66046	-0.431751	0.23707	-0.543267	-0.180673	0.167656	0.256958	0.794323	0.79107	-0.119668	1.18647	0.592791	0.152376	-0.328687	-0.192953	-0.169486	-0.368644	0.133751	0.00133205	0.125791	0.250234	-0.433274	-0.293517	0.269125	0.0361676	0.339273	0.971066	0.87683	0.111452	0.0711071	0.0466791	0.857476	0.61187	0.31449	1.48651	-0.490701	0.637909	1.43546	0.0458696	0.487065	-0.966501	-0.0794228	-0.785143	0.226216	-0.201541	0.526156
347	0.599616	0.558209	0.190735	0.269167	0.176497	-0.536948	0.74889	-0.0991746	-1.58526	0.027876	-0.56061	-0.406534	0.277517	-0.0383703	-0.150714	-0.117756	0.297665	0.192478	-0.374959	0.221676	0.109694	-0.373081	-0.188171	-0.815205	0.0472653	-0.0596465	0.51767	0.5481	1.08938	-0.431593	-0.626496	-0.799861	0.696013	0.399318	0.17045	-0.832976	0.715365	-1.12499	-0.379991	0.55797	0.274416	0.485723	0.72414	0.3302	0.534872	0.250406	0.0106577
348	-0.412935	0.962684	0.578219	-0.569384	0.299985	0.293356	-0.0370054	0.852969	0.677777	0.151737	-0.119471	-0.343179	0.168237	0.228894	-0.5209	-0.157519	0.192934	-0.0102461	-0.413963	0.172744	0.505637	-0.257758	0.0658306	-0.158738	0.951496	0.553012	0.435983	-0.349065	-0.993216	1.12053	0.146274	1.14757	0.49061	0.599351	0.0266176	0.169616	0.326431	0.211075	-1.83434	-0.971032	-0.0450015	0.390701	0.301093	0.146304	-0.564731	0.0327409	0.410675
349	0.454758	0.677572	0.219141	-0.112908	0.526167	0.78206	0.973784	-0.204179	0.383003	0.372873	-0.382099	0.594252	-0.0439989	0.358544	0.0782137	0.300128	0.247046	0.210975	-0.0315125	-0.499607	0.319384	-0.190923	0.359734	-0.370053	0.123125	0.0491271	-0.109284	-0.842513	-3.02734	-1.9038	-1.20232	-0.462124	0.827057	-0.445868	-0.480057	0.404789	-0.886767	-0.875761	0.619004	0.252612	0.357426	0.954049	0.0680428	0.640228	0.0303472	0.599513	-0.097248
350	0.944529	1.48207	-0.421306	0.553913	0.559167	0.517675	0.651142	1.2463	0.287277	0.253171	-0.876323	1.97705	0.488389	0.17799	0.867106	-0.289445	1.09711	0.367568	1.30276	0.108164	0.399666	-0.139915	-0.279179	-0.602167	-0.0982688	0.360086	0.00379768	1.72183	0.52477	1.58075	0.274104	0.145617	0.252172	1.98181	0.0342618	0.767384	0.8116	-0.918244	0.122588	-0.0892785	2.05657	-0.230573	0.316576	-0.0162905	1.40434	0.476763	-1.0958
351	2.78037	2.56433	0.166473	1.51272	-0.073378	0.830213	1.4367	0.388086	2.32535	2.15671	1.7777	0.349373	2.27291	0.899007	1.51884	0.79373	1.69321	0.705	3.42361	1.39558	2.16853	2.55652	2.20833	1.61974	1.90684	2.10442	1.41237	0.509931	-0.430656	0.218023	2.13916	1.3133	1.94661	0.743056	0.841411	1.56488	0.966811	1.1035	0.471342	1.53161	0.810049	1.45985	-0.10258	0.343105	1.36473	1.07391	0.540128
352	7.11644	6.68049	4.62075	6.88887	8.07091	7.12635	7.03701	4.82837	5.9541	10.0518	6.56677	6.54541	14.7827	7.4893	9.5841	10.1297	8.18854	9.12789	16.4766	8.72139	10.9889	13.6431	13.4175	8.60779	10.9658	10.5129	8.45494	6.83617	7.23793	7.25909	7.66007	5.03273	10.6275	6.08726	3.46833	5.42213	6.47871	7.31308	4.15053	3.36545	3.51777	5.24427	2.74794	2.18438	7.4219	5.72692	3.63097
353	18.0003	18.5402	14.7751	22.5029	27.0767	25.4165	16.1988	18.0031	14.3875	28.5494	16.6119	19.0758	39.089	21.6059	28.8238	28.1513	26.6103	24.5274	47.926	25.4037	35.292	39.5456	37.561	28.2236	32.9896	30.1926	27.2107	18.9741	17.3592	16.3821	19.5474	13.8304	39.0612	23.5761	17.4628	17.2685	19.5583	20.8412	15.3808	12.6301	10.7211	14.6901	7.98821	10.9651	26.3654	24.9146	17.1513
354	33.3911	35.4641	28.7062	48.1773	54.6532	55.4111	31.8475	33.4522	29.154	58.5133	34.23	37.6954	71.2899	40.5874	53.8962	50.7799	53.5411	49.4808	93.6442	53.7165	73.012	66.6227	66.1811	50.984	65.104	63.2135	54.5508	37.4157	35.5087	31.882	37.654	25.73	77.2407	50.7182	40.225	34.563	37.6858	38.8998	34.2597	24.4189	23.8079	30.6154	18.516	24.47	55.8015	53.3533	39.2138
355	45.9732	53.398	44.239	71.942	82.1622	80.8691	46.8725	52.5584	45.1894	84.8048	52.6983	59.5794	99.2298	59.8758	79.1674	63.5432	71.1227	65.2843	126.996	80.8384	105.423	82.4312	85.5414	70.4724	86.6119	91.215	78.5819	57.4267	46.6421	48.5661	53.4826	34.8831	119.469	81.8535	66.0845	45.2793	55.431	51.0589	53.1528	40.3203	41.2616	43.6199	28.8259	36.7775	85.0315	81.6071	64.2981
356	62.371	69.2962	58.5877	85.272	100.919	102.121	60.4147	63.9137	54.8038	106.73	71.9424	80.4343	129.083	80.2937	105.622	66.5106	76.952	71.0347	153.427	104.498	128.516	94.8388	98.3063	84.5066	102.484	111.192	96.2933	69.7756	56.9648	59.7022	71.5364	45.7368	153.783	110.251	89.2631	56.4616	73.7	65.3142	72.7054	56.783	56.32	50.6337	35.1903	48.0161	98.2773	99.2585	82.1397
357	79.3668	86.2877	78.3375	104.683	122.749	122.642	76.553	77.8485	67.0538	135.564	96.9	107.504	161.836	106.416	136.385	73.973	84.5933	75.5263	180.487	129.806	151.642	113.266	116.138	99.4339	121.112	133.225	117.162	85.8034	73.8584	68.399	92.2098	60.0693	183.068	137.64	112.574	71.9003	97.4293	80.0647	88.7207	69.5762	72.3805	53.2766	38.1464	53.2526	109.144	110.856	93.8065
358	93.9293	103.33	94.6075	126.98	146.113	145.525	95.2567	95.0622	84.3901	166.239	124.233	134.842	191.624	133.885	167.381	83.9728	95.734	80.267	205.605	152.247	174.677	134.006	138.043	117.008	144.36	162.666	141.926	103.27	79.6251	83.2151	114.362	71.5111	212.409	163.702	137.045	92.9321	120.634	98.3277	108.821	98.9134	95.7432	62.0169	42.878	58.1338	121.522	123.531	106.898
359	108.828	118.319	107.886	150.577	165.885	166.675	117.959	110.848	98.6624	193.231	151.818	164.312	217.905	158.927	193.495	92.8302	105.312	88.3572	222.046	175.242	195.334	152.974	160.151	131.942	163.715	185.332	162.313	120.171	101.362	97.2855	138.047	86.766	235.263	186.591	159.607	111.852	141.598	116.457	125.986	114.824	116.482	65.0366	46.2552	62.6885	135.136	137.579	118.523
360	121.152	134.597	116.687	170.007	182.853	185.532	139.425	126.471	114.591	217.235	177.128	187.59	236.417	181.522	214.927	100.593	112.127	93.9628	234.729	193.46	210.361	168.317	182.459	144.904	179.19	206.987	177.224	141.351	115.282	108.402	157.796	99.4856	250.981	205.36	179.164	130.027	157.11	131.168	147.148	133.455	132.669	74.7995	49.7848	68.2875	147.959	148.852	132.452
361	131.969	146.53	131.807	186.275	197.76	203.235	155.479	138.521	128.703	233.784	198.988	208.183	251.78	197.99	233.688	107.619	115.971	98.9161	244.269	208.612	222.511	184.562	198.999	159.079	196.231	219.908	192.512	158.964	123.773	124.851	172.891	112.262	267.758	220.915	195.863	149.35	171.949	143.768	163.273	149.993	150.251	74.5596	53.7041	72.485	155.362	157.368	142.727
362	143.114	155.239	142.681	200.342	212.58	216.206	173.669	151.704	144.377	247.852	217.648	223.721	264.287	214.102	247.068	112.371	121.954	101.861	249.17	219.231	230.802	197.126	209.323	172.197	209.11	234.296	204.982	172.741	134.582	136.089	190.893	126.145	282.289	237.113	212.27	162.243	180.219	151.716	175.754	166.507	168.254	83.9648	58.0524	74.9112	164.89	165.552	151.845
363	151.459	162.042	149.376	212.008	221.839	226.195	188.585	162.468	156.793	257.431	230.897	235.626	272.534	227.274	257.269	116.207	126.954	105.709	252.341	226.689	236.458	207.011	221.953	184.94	217.694	240.838	214.523	186.804	157.415	146.275	204.297	138.529	292.026	247.581	225.224	177.418	190.375	159.778	191.673	179.998	184.088	86.5863	61.3886	77.6921	173.736	171.842	158.121
364	160.721	170.373	155.375	224.02	230.573	237.316	204.159	169.893	166.92	262.569	240.889	246.826	277.449	236.181	265.128	120.771	128.75	107.462	254.536	232.214	241.533	217.062	230.448	193.998	224.303	249.379	223.484	200.56	164.202	156.527	214.499	151.104	298.775	258.597	236.018	188.933	199.957	167.418	203.65	189.706	193.859	94.3585	63.6985	80.9674	180.88	175.084	161.94
365	168.088	176.568	164.351	231.422	237.445	242.998	215.378	172.434	174.658	264.9	250.859	254.374	281.886	245.012	270.406	123.865	131.065	109.733	256.521	236.759	245.74	223.433	236.405	204.241	229.014	254.108	228.711	206.558	175.56	166.868	220.271	160.189	305.328	269.81	243.763	200.356	207.931	172.646	214.059	197.871	204.537	97.0789	66.0657	83.3501	183.038	180.827	166.604
366	173.961	181.488	171.578	237.953	243.779	247.333	221.749	177.643	182.257	267.056	258.79	260.955	284.973	251.185	274.467	126.4	133.058	109.588	256.581	240.189	246.479	230.757	237.76	209.64	232.978	256.937	233.31	215.823	184.234	179.309	229.749	168.205	310.189	278.437	251.715	209.593	214.958	176.851	222.035	207.444	207.217	102.253	68.3397	85.6901	188.904	185.667	170.657
367	178.648	187.65	176.347	242.173	250.194	250.723	232.535	183.387	188.071	269.737	261.267	263.587	286.166	255.921	275.469	127.69	135.44	109.362	255.874	243.418	247.554	236.5	241.271	212.434	235.42	260.632	235.746	224.636	191.236	188.455	231.263	178.324	311.843	284.838	257.781	219.936	224.217	180.546	232.909	220.841	212.534	103.174	70.9696	87.371	192.358	188.758	175.695
368	184.244	190.724	180.958	246.557	252.544	252.54	238.633	183.578	192.654	268.324	266.593	265.963	285.904	259.377	278.151	129.325	134.187	112.572	255.547	246.241	247.98	240.961	243.999	218.367	237.792	261.926	237.518	229.665	198.49	193.001	241.082	184.204	317.161	289.458	263.528	224.617	231.498	183.614	241.316	228.212	219.58	104.379	73.8871	88.8121	194.677	191.615	178.645
369	187.467	195.798	183.359	249.872	254.81	254.086	242.343	186.892	198.076	269.871	269.131	269.811	287.862	262.562	278.292	129.595	134.532	115.395	254.099	246.243	249.291	244.223	247.301	220.382	240.571	262.256	239.813	231.643	205.366	198.064	247.156	190.189	319.621	292.33	266.736	230.963	236.012	186.901	243.195	233.781	223.095	110.293	75.2076	90.4696	196.517	195.182	181.808
370	190.861	199.448	186.832	253.694	257.549	256.775	248.449	191.819	204.005	268.695	271.147	270.833	287.941	264.609	278.522	129.14	133.434	116.472	255.603	246.123	249.446	244.23	250.176	221.106	243.862	263.289	240.342	232.679	208.56	201.628	249.91	193.383	320.634	295.47	271.496	233.594	237.682	189.405	250.61	237.913	230.888	113.102	77.552	91.844	198.426	198.352	185.658
371	193.6	203.055	189.431	254.44	258.673	258.593	252.34	193.043	207.005	268.538	270.722	270.44	287.835	266.755	281.127	130.227	133.957	115.879	254.663	246.158	249.656	245.266	248.192	225.309	245.449	263.392	240.293	234.443	214.59	206.463	249.238	198.175	319.69	297.01	274.826	242.395	241.788	192.112	255.264	241.773	234.191	116.793	79.4976	93.518	199.638	200.021	189.208
372	196.017	206.456	193.366	255.174	260.498	259.838	254.095	194.243	206.708	270.178	271.823	271.103	287.861	267.736	280.425	130.655	135.302	114.73	254.521	243.564	250.48	244.114	249.052	225.81	245.193	264.24	238.274	235.705	221.131	210.285	254.021	201.689	321.021	300.598	278.567	244.269	243.106	196.519	257.534	244.381	234.416	118.559	82.2557	94.959	200.293	199.24	191.09
373	198.669	202.162	195.978	255.672	259.385	260.081	256.03	195.906	213.178	267.422	271.618	271.215	287.285	269.328	280.478	131.233	132.921	115.675	252.449	245.564	249.588	244.573	248.865	226.306	246.09	264.681	238.859	239.51	221.673	215.423	251.94	205.818	320.999	300.312	281.292	250.915	246.587	199.839	258.514	245.933	235.8	121.893	85.3627	95.8265	202.993	198.959	191.751
374	200.33	208.637	197.606	257.432	260.717	262.406	256.962	193.799	215.402	267.461	270.27	272.13	287.018	270.072	281.687	131.337	131.443	115.576	251.616	244.068	248.84	245.216	246.785	226.867	244.443	264.256	238.433	241.559	226.71	215.942	254.039	206.46	322.042	301.871	285.217	253.941	249.133	203.016	259.279	247.19	241.377	124.434	86.8191	98.0709	203.487	198.992	193.895
375	202.969	209.939	201.129	256.856	261.529	262.847	258.611	192.913	216.574	266.539	270.884	270.979	286.87	271.839	281.085	130.751	130.908	114.875	252.632	245.946	249.685	246.68	246.592	225.713	242.773	264.067	238.835	243.833	228.277	219.022	255.748	208.209	321.722	302.565	288.171	255.367	251.109	204.716	262.567	250.215	245.63	126.508	88.137	98.6757	205.721	198.748	193.59
376	204.495	210.163	201.037	258.027	262.653	262.242	261.11	191.706	219.493	264.378	267.511	271.129	287.043	271.617	280.006	129.804	131.602	113.478	252.021	244.323	249.012	243.566	243.536	225.683	244.167	261.712	236.204	243.556	226.872	218.892	255.549	208.519	321.753	303.399	284.869	256.264	250.927	205.109	264.601	251.403	248.424	129.15	88.9287	100.564	204.622	201.036	198.128
377	206.34	210.623	202.821	257.209	262.589	262.687	259.681	191.865	219.537	262.299	268.114	268.575	286.585	271.764	279.88	128.504	132.668	113.063	250.937	243.086	247.547	244.988	245.455	225.957	242.358	261.61	235.812	244.777	227.928	221.668	251.185	210.127	321.517	302.413	288.553	256.586	251.966	208.121	263.826	251.196	251.61	131.903	89.3305	101.055	204.702	200.472	197.863
378	206.357	211.641	203.623	256.563	262.829	261.518	257.771	193.566	221.382	261.611	266.303	267.952	287.491	273.164	277.992	126.414	132.46	113.313	249.707	244.36	245.89	243.798	245.199	226.828	241.363	261.619	233.701	244.635	229.533	223.156	254.151	210.044	318.612	302.233	288.308	257.323	251.371	206.985	262.332	254.1	249.65	133.027	90.7289	102.355	203.972	198.548	199.621
379	209.039	211.455	202.862	255.802	262.869	261.965	257.618	195.684	219.969	260.813	265.344	264.21	286.348	272.658	278.964	126.281	132.955	115.333	249.937	241.905	244.587	243.194	243.399	227.128	240.492	259.103	231.765	247.27	232.233	224.397	253.805	211.689	317.227	300.81	289.616	258.326	250.547	209.355	261.033	254.495	248.369	134.782	91.9626	102.928	204.503	198.326	199.082
380	209.003	212.502	206.22	257.275	262.254	260.127	254.023	192.719	220.753	260.154	265.041	262.634	285.953	272.988	279.459	124.591	132.233	115.419	247.657	238.137	242.839	240.703	241.51	224.747	238.693	259.539	231.74	246.219	231.993	224.81	251.67	214.345	315.975	300.955	291.361	258.946	248.803	209.561	262.511	254.129	249.532	136.487	92.123	102.874	203.377	195.426	199.948
381	209.179	212.112	207.963	256.741	260.559	258.932	254.257	190.736	223.54	256.774	261.613	261.586	285.69	272.316	278.842	125.439	131.385	115.434	246.225	238.189	241.953	241.016	237.788	224.616	235.832	259.819	231.034	245.544	232.341	224.578	248.496	218.92	316.554	301.402	289.714	259.247	251.017	211.037	262.304	253.714	248.989	138.874	92.0402	103.929	202.265	195.3	200.641
382	210.387	213.07	207.781	256.569	259.689	256.545	252.762	186.949	226.27	254.452	260.788	258.729	284.48	271.395	280.818	127.096	133.479	115.321	244.284	236.923	241.512	238.608	236.962	222.559	232.67	257.628	227.697	245.585	232.25	222.204	248.998	215.538	315.521	299.527	290.235	258.317	249.242	211.744	263.855	252.887	248.254	140.4	92.562	105.385	199.413	194.856	200.927
383	211.824	213.303	207.895	257.014	259.388	258.368	251.156	185.096	226.233	252.46	257.689	257.334	284.015	270.802	279.036	127.154	134.1	113.526	244.162	236.114	239.998	240.457	237.77	222.036	230.466	256.334	227.197	244.627	232.847	224.049	246.459	218.19	314.705	298.614	290.396	258.836	252.288	213.635	263.229	250.786	248.731	140.926	93.9574	105.738	197.803	195.974	199.397
384	213.261	210.346	208.143	257.258	257.694	258.014	249.458	182.397	224.639	248.739	258.613	256.235	284.357	271.216	279.235	126.583	132.741	112.381	242.46	234.986	239.378	238.998	235.923	222.111	228.703	254.49	225.814	245.114	233.169	224.909	244.51	216.696	316.612	296.001	288.712	259.616	252.008	211.456	265.316	252.909	250.244	141.663	95.1279	105.202	198.721	194.749	198.146
385	213.647	211.873	207.584	257.033	257.179	254.833	248.118	180.948	224.042	248.232	255.626	253.47	282.487	272.535	279.721	125.544	130.725	115.785	240.849	232.14	236.364	238.783	234.834	219.196	227.389	251.675	222.363	242.945	234.551	223.6	245.546	215.512	315.757	293.361	288.576	259.501	252.688	211.391	262.3	254.144	250.067	141.856	94.9015	104.471	200.02	194.066	197.295
386	213.231	213.057	209.639	255.509	255.55	254.243	249.275	178.187	221.336	248.262	252.632	254.994	281.96	272.712	280.234	123.638	131.144	116.91	239.891	231.234	233.112	237.938	232.654	215.353	225.891	247.395	220.49	240.831	234.178	222.358	247.384	218.61	315.208	293.422	289.106	257.789	253.26	212.338	264.177	251.166	250.352	142.562	96.1609	104.204	200.839	190.986	199.786
387	213.341	213.264	209.265	253.552	253.141	253.531	248.27	178.108	219.239	246.855	250.499	252.021	281.264	272.923	277.462	124.43	131.718	115.919	238.676	232.697	229.424	237.392	232.269	215.413	223.658	249.222	221.234	242.012	233.327	218.752	243.176	214.055	314.268	292.078	286.218	258.109	252.452	210.823	262.238	253.044	249.708	142.179	95.8831	105.378	201.189	193.424	197.305
388	214.654	212.314	208.088	252.139	252.946	253.944	246.799	177.091	217.471	245.755	249.161	249.891	282.098	270.842	278.58	123.582	129.047	111.439	237.279	232.483	226.748	237.936	230.413	214.208	221.699	249.75	221.468	245.119	230.882	219.4	243.736	216.577	312.618	290.146	286.056	257.728	253.187	208.823	262.76	251.189	252.602	143.237	96.7234	105.788	202.45	193.142	198.889
389	215.308	212.187	206.956	250.636	250.625	252.628	245.254	176.714	218.245	241.052	250.033	248.086	281.333	269.683	277.33	123.769	128.922	110.87	235.736	232.679	224.588	238.04	230.547	215.609	221.587	248.689	222.315	246.178	233.381	218.329	243.141	214.96	311.213	289.428	283.598	256.37	253.476	210.115	261.102	254.356	253.059	144.263	96.249	103.576	202.079	190.548	198.163
390	215.06	211.635	205.163	250.301	249.745	252.225	246.444	174.796	214.85	239.813	245.818	246.288	280.674	268.635	277.255	126.929	127.772	112.551	234.889	232.564	222.821	236.858	228.66	211.432	221.248	248.93	222.898	245.308	231.77	214.089	240.874	215.022	310.455	287.544	284.485	254.768	252.371	208.144	260.959	253.839	249.333	143.707	96.487	105.35	200.744	189.824	195.723
391	215.316	212.367	207.213	249.869	247.487	252.967	245.354	172.876	215.072	238.189	243.488	243.141	280.886	268.306	277.518	126.957	125.79	113.526	232.427	228.692	221.462	238.295	226.692	210.919	219.18	249.404	220.411	244.167	231.131	215.653	240.765	214.148	310.033	287.653	284.531	254.106	252.315	206.877	262.098	254.016	250.248	144.584	96.8372	104.787	199.545	190.88	194.66
392	215.879	211.481	206.148	247.719	246.104	252.688	245.363	172.133	213.605	234.18	239.948	241.929	280.504	268.146	276.889	125.746	124.45	114.42	230.037	228.576	220.543	239.338	225.361	213.626	220.075	248.745	221.508	244.196	228.654	213.918	237.691	217.003	308.672	283.979	283.643	252.636	251.852	207.024	261.824	253.555	248.391	144.007	96.8224	104.852	198.734	191.048	194.216
393	215.19	210.831	205.657	246.662	245.448	250.784	243.812	172.002	211.542	228.837	240.863	240.682	280.263	265.868	275.427	126.81	123.417	112.79	229.522	226.885	221.344	238.385	225.609	216.164	219.764	245.946	221.43	243.578	229.614	213.603	239.781	213.489	307.681	281.828	283.085	253.183	250.249	205.116	263.052	255.07	246.973	144.688	97.3319	105.618	197.307	191.724	194.397
394	214.896	208.65	206.586	246.908	244.481	252.975	244.151	171.399	206.175	228.899	238.38	239.026	279.36	265.314	275.082	128.494	122.398	111.735	228.693	226.299	221.298	238.509	223.569	217.976	219.974	243.77	220.996	243.189	227.838	212.519	235.996	210.581	307.765	280.445	280.117	253.061	247.404	204.085	262.488	254.71	249.53	145.632	98.0638	106.782	194.803	191.135	192.006
395	214.691	211.312	206.283	246.762	243.68	250.825	241.317	170.788	209.588	229.745	234.43	236.607	278.302	264.241	273.419	130.618	125.404	110.104	228.446	225.448	220.667	237.46	223.412	220.259	219.414	239.356	219.04	239.66	225.436	213.524	235.106	209.749	305.834	278.631	279.039	252.125	247.909	202.619	260.676	252.886	249.104	145.866	98.7334	107.314	192.043	191.51	189.154
396	214.896	210.025	206.94	245.428	243.599	250.847	242.728	171.429	211.874	227.444	232.227	234.397	277.432	262.863	270.799	131.11	126.418	112.744	228.177	222.466	219.452	237.348	221.786	219.733	219.269	238.063	217.056	240.806	225.655	212.269	233.485	208.379	304.943	275.528	280.211	251.782	245.479	199.864	260.539	252.699	249.508	147.093	98.9932	107.106	191.152	191.675	190.026
397	215.157	210.894	206.772	245.144	244.463	250.669	242.165	170.176	212.164	226.797	229.53	230.432	277.307	262.647	269.631	131.999	126.196	117.25	229.13	220.956	219.282	236.654	222.995	217.285	217.097	234.664	214.71	239.971	223.963	207.723	232.597	208.179	304.797	274.223	280.691	250.83	244.47	201.315	261.524	251.354	251.73	147.837	99.9488	106.785	193.959	190.359	188.309
398	214.02	211.061	206.1	244.03	244.498	250.728	243.354	171.789	210.434	227.709	225.338	227.997	275.62	260.817	268.992	131.522	125.847	118.13	228.315	218.69	218.356	234.657	222.815	216.636	214.858	232.285	211.466	239.089	223.366	211.269	233.827	206.485	303.057	272.913	278.149	247.806	243.188	200.6	259.15	252.012	249.188	148.494	100.263	105.321	193.91	187.174	187.695
399	214.805	209.522	205.043	243.529	243.242	249.476	239.859	170.717	208.872	225.358	221.796	225.915	275.693	259.562	267.836	132.335	124.49	116.583	228.603	216.167	216.666	234.329	220.019	215.309	215.348	232.485	210.257	239.736	221.593	211.607	232.505	205.3	302.758	272.033	276.642	247.79	245.069	203.186	259.538	249.738	246.593	149.2	100.524	105.484	192.38	185.386	186.562
400	213.836	208.853	205.033	242.501	240.469	247.403	238.59	165.827	207.105	222.914	220.661	226.797	274.821	258.771	266.553	132.691	126.213	113.65	226.952	216.777	214.571	233.924	215.485	212.776	214.742	233.964	209.558	237.267	219.869	209.238	225.724	206.547	300.918	269.837	273.427	243.616	244.956	201.791	257.904	251.469	243.73	148.69	100.414	105.634	190.617	182.651	186.153
401	214.062	208.877	206.738	243.464	238.664	248.788	236.2	163.85	207.874	220.415	217.236	224.55	274.28	258.184	264.648	130.921	128.766	110.568	225.448	216.505	212.654	229.499	215.407	210.995	213.235	231.847	207.093	236.527	219.48	208.921	225.099	204.185	301.258	268.392	271.814	240.138	245.266	199.97	256.44	250.643	244.195	149.413	100.394	106.382	188.529	183.373	185.219
402	213.02	209.393	206.786	242.866	237.415	246.326	233.974	166.916	206.178	218.462	216.878	222.729	273.249	258.769	263.682	130.201	130.034	110.055	222.391	214.689	210.738	230.361	214.268	208.106	209.392	229.538	207.888	235.064	218.901	207.914	231.518	200.983	299.06	265.829	271.3	238.965	245.709	199.105	255.895	249.076	240.294	149.153	99.3128	106.784	186.953	183.44	185.066
403	211.564	209.238	206.885	240.587	239.509	248.489	233.259	160.554	206.997	214.66	216.044	219.604	273.376	258.308	262.491	128.256	131.667	111.405	223.801	214.582	211.429	229.178	212.939	202.711	206.476	229.49	206.169	234.877	215.729	206.356	228.982	202.925	299.414	266.604	269.216	236.298	245.895	200.226	255.135	247.115	239.673	149.158	100.267	106.774	186.662	183.114	186.045
404	212.312	207.232	206.811	239.154	240.306	249.639	231.597	162.852	208.861	213.677	213.798	220.306	272.418	258.847	259.449	126.194	132.827	114.694	223.196	214.652	209.454	226.316	209.717	203.303	202.905	231.772	204.115	232.137	213.753	202.209	225.274	198.933	298.442	265.011	267.763	234.928	245.136	200.186	253.997	246.859	237.953	148.728	100.074	105.783	183.739	182.982	185.689
405	211.908	208.702	206.372	237.736	241.021	247.028	233.227	163.37	206.165	214.593	211.781	218.901	272.083	257.797	258.111	125.53	131.148	117.321	222.132	213.391	207.04	223.752	207.31	202.653	200.99	230.927	202.309	230.455	210.541	198.254	228.949	198.082	299.248	264.462	266.128	233.418	245.438	198.708	253.123	246.443	240.735	148.47	100.207	105.948	182.273	183.33	184.567
406	212.686	207.966	206.133	237.791	240.013	243.12	230.108	164.177	200.609	209.773	209.62	219.844	272.655	256.764	257.404	130.089	128.074	114.722	222.597	212.245	204.137	224.938	205.116	202.578	198.016	229.233	200.052	228.224	208.717	199.026	226.448	197.481	300.139	260.923	264.208	230.865	245.7	199.032	251.202	245.229	240.799	148.34	99.3733	106.096	180.124	182.761	183.889
407	211.135	206.93	205.659	237.074	238.141	243.317	229.501	163.546	197.322	206.725	207.636	220.976	270.672	255.897	257.836	130.569	126.111	111.163	221.125	209.163	200.424	225.557	201.802	199.744	194.438	224.849	200.87	225.186	214.638	198.694	226.438	199.856	300.632	262.067	262.748	227.809	243.22	201.804	254.283	245.348	239.145	147.95	100.309	105.011	179.134	180.718	181.946
408	210.973	206.894	205.679	234.984	239.73	243.908	226.992	164.591	194.57	206.313	205.03	219.628	270.774	254.174	256.753	131.749	123.31	108.627	220.646	207.889	200.668	224.611	198.661	199.785	193.062	223.258	202.137	228.806	216.548	195.938	225.848	197.973	299.21	260.1	259.956	224.014	243.219	199.449	253.102	248.369	235.296	146.508	100.444	105.279	181.195	180.28	179.605
409	211.141	206.669	205.823	235.092	239.469	241.192	224	166.116	193.658	205.173	206.059	219.631	269.867	252.439	254.763	133.191	122.577	108.123	221.455	205.928	200.565	223.309	198.499	198.515	193.76	224.615	201.5	229.036	215.898	196.28	226.47	196.637	298.124	258.56	260.021	221.622	241.736	199.287	251.372	248.751	236.138	146.085	100.627	105.964	177.322	178.417	180.335
410	210.684	207.375	206.406	233.899	240.229	242.989	222.01	164.509	191.689	200.551	203.065	221.391	269.161	249.502	254.353	132.323	121.691	108.947	221.975	206.134	200.867	224.68	197.822	202.64	196.156	225.239	201.896	230.144	218.196	197.176	225.839	195.201	298.92	257.434	258.959	218.847	240.277	197.248	251.577	251.14	235.594	145.162	99.2858	105.601	175.035	177.596	181.622
411	210.245	207.578	206.204	233.013	239.028	241.325	218.522	161.845	192.982	198.305	201.514	216.639	269.184	248.686	254.835	130.242	118.855	109.102	219.224	206.851	200.294	227.772	199.757	204.242	193.833	225.434	199.108	228.266	217.443	193.788	224.037	196.679	296.699	256.343	258.715	216.648	239.488	195.034	252.823	250.453	234.398	145.624	99.9817	105.923	174.808	175.157	182.459
412	210.211	206.054	205.762	230.176	239.208	239.161	221.44	161.337	188.224	199.661	199.91	218.72	270.6	247.733	254.256	126.185	117.765	109.614	219.546	207.217	199.471	225.673	201.32	202.649	189	225.897	197.525	227.801	216.38	192.946	220.802	196.504	297.885	254.816	256.857	213.655	237.226	193.067	251.019	251.097	238.188	144.901	100.337	105.439	173.512	173.92	182.154
413	210.85	206.938	205.405	227.852	236.91	236.454	225.336	162.011	189.554	197.895	200.271	217.217	270.698	246.901	251.855	122.236	117.835	108.78	219.047	207.29	199.396	227.093	198.674	200.039	185.405	222.063	195.855	226.371	218.239	193.157	218.363	196.461	294.712	256.486	257.142	210.402	234.033	191.865	251.478	247.349	238.495	145.523	100.682	104.719	174.728	171.089	178.126
414	209.768	206.809	204.682	223.777	234.853	235.031	226.742	164.327	189.271	198.504	200.497	213.496	270.291	245.465	252.338	122.96	117.248	108.254	215.22	206.464	196.274	228.097	196.083	196.273	179.77	223.857	195.641	222.715	217.86	193.616	217.583	192.865	294.281	255.392	252.198	208.14	233.893	190.44	250.398	248.307	237.231	146.033	100.117	103.572	173.643	168.683	174.834
415	209.676	204.345	203.049	224.376	235.494	233.665	227.937	167.188	189.948	196.341	200.785	214.848	269.79	244.588	250.039	123.994	116.648	108.549	214.193	208.448	194.827	226.84	195.28	198.209	179.496	225.614	195.87	224.599	214.824	192.466	218.248	193.026	293.568	252.429	252.054	206.392	235.408	189.185	247.812	248.365	237.625	146.203	100.61	103.092	172.488	168.391	172.521
416	210.778	204.762	203.305	224.977	236.049	234.225	227.299	166.754	191.689	197.624	200.613	212.101	269.717	244.15	249.127	125.697	118.554	108.664	212.752	206.266	194.217	228.328	194.375	198.411	180.223	223.419	196.181	222.947	211.899	191.126	215.895	188.677	293.018	252.964	252.258	205.538	234.549	185.187	247.055	245.866	232.967	145.179	99.815	103.392	172.177	168.555	170.675
417	210.895	205.386	203.291	224.286	236.153	234.05	224.07	168.076	192.822	196.726	199.154	211.294	270.442	243.399	248.411	123.886	121.425	108.147	215.901	210.098	193.992	228.605	195.355	198.877	181.703	223.144	198.743	222.066	210.198	195.145	216.669	189.989	294.025	251.916	249.838	203.222	233.347	184.444	243.383	243.346	231.17	145.896	100.009	104.048	172.952	168.068	170.29
418	209.992	203.801	204.662	223.002	235.756	234.037	216.524	161.507	194.53	194.512	197.166	209.028	269.958	242.339	247.173	123.262	123.284	105.82	216.728	210.616	194.448	226.403	193.144	197.765	181.303	223.09	197.926	222.532	210.211	191.704	216.149	186.601	293.625	252.197	249.534	201.169	230.777	183.519	243.44	244.071	230.517	146.025	100.437	104.353	175.42	166.312	169.984
419	211.215	202.913	204.832	224.933	236.328	232.473	213.121	158.023	193.973	191.174	196.474	208.085	268.899	239.832	245.855	123.502	122.586	105.07	216.122	210.584	193.244	221.815	190.222	195.659	178.452	221.346	195.765	219.666	209.183	188.846	213.735	188.267	293.137	250.355	248.973	199.212	227.091	185.361	242.595	243.111	228.762	145.64	99.9999	104.75	176.481	164.777	168.146
420	211.4	203.709	204.222	223.733	235.923	232.873	206.614	155.302	191.415	186.058	194.799	207.511	268.344	239.917	242.071	123.467	124.33	103.633	214.593	208.42	193.169	218.742	189.456	195.525	176.159	218.361	194.173	218.868	207.657	188.129	207.319	183.481	292.04	250.97	248.364	197.162	224.374	183.979	243.508	240.731	229.64	145.954	100.015	104.438	176.743	163.864	163.67
421	211.119	202.784	202.941	223.065	234.811	233.427	201.779	158.083	193.814	183.573	193.404	209.191	267.272	240.608	242.239	122.599	126.303	103.478	213.004	206.535	190.446	218.089	188.937	193.62	178.692	222.023	192.776	218.123	210.864	184.801	208.341	186.39	290.441	248.288	245.008	195.419	220.571	183.089	240.027	241.191	224.221	147.392	99.3659	104.228	176.754	162.526	161.783
422	210.24	203.181	204.352	220.994	235.841	234.806	195.263	156.668	192.049	182.408	193.963	211.175	264.572	240.192	242.121	125.905	127.626	104.461	210.373	205.499	188.511	217.68	188.514	191.392	181.036	222.375	192.054	216.84	210.65	181.538	205.863	185.045	290.638	247.105	246.67	195.83	218.594	181.176	239.6	241.129	223.388	147.784	99.4786	103.633	175.811	160.165	160.08
423	209.969	203.607	202.204	219.778	235.029	234.431	191.118	155.477	191.323	183.074	193.007	209.836	265.585	242.076	240.388	126.339	128.201	107.499	209.039	207.317	188.354	220.455	187.076	188.477	184.141	221.274	190.92	218.212	208.923	177.161	204.231	181.634	290.081	246.544	246.89	197.213	217.133	182.242	240.507	243.474	223.152	147.401	99.1774	104.415	175.357	160.085	159.753
424	210.338	203.009	202.473	218.272	234.595	232.934	191.193	156.217	187.377	179.847	190.437	208.87	266.212	240.272	239.739	124.145	126.523	109.032	209.61	206.309	186.328	223.576	189.279	191.306	185.013	219.73	189.74	214.592	207.35	176.626	202.344	181.197	288.308	244.519	244.067	197.315	217.428	183.141	241.415	244.171	225.038	147.938	99.1903	103.974	173.486	161.659	158.73
425	209.189	204.021	201.612	216.68	234.786	233.15	194.672	154.598	182.709	178.165	191.904	209.666	267.03	239.736	238.292	122.104	121.647	112.791	208.995	205.909	184.359	223.883	188.528	191.963	182.472	220.518	188.832	215.741	206.837	176.101	203.71	181.241	289.124	244.363	241.417	197.388	215.939	181.822	239.728	245.285	224.136	148.486	98.5871	104.098	171.44	160.149	157.68
426	210.506	202.38	201.436	216.525	233.594	234.404	196.154	156.922	182.701	175.434	192.423	207.789	267.911	239.792	236.86	120.907	119.587	115.261	208.36	206.456	183.259	219.659	187.036	191.571	183.788	219.251	187.58	215.75	205.256	174.08	204.228	179.348	289.376	244.608	240.159	195.687	211.98	180.321	240.351	243.808	220.793	149.011	98.5236	104.052	170.693	159.104	156.731
427	211.305	203.342	201.09	217.527	231.428	231.964	195.474	153.234	184.956	176.559	194.57	206.508	267.101	238.444	237.871	121.632	117.526	113.797	207.789	203.572	182.969	219.114	188.161	190.325	184.372	217.532	188.39	213.706	205.058	174.602	203.118	176.091	289.563	243.212	236.145	192.55	208.539	179.521	239.842	245.654	222.306	148.649	97.5838	104.032	170.016	160.675	156.87
428	209.77	202.641	200.695	215.711	230.019	232.419	195.408	149.442	183.343	178.118	196.283	205.611	267.063	238.727	237.723	120.568	115.808	112.603	208.438	202.496	181.96	217.961	184.056	190.531	182.637	218.068	189.535	213.541	204.766	174.556	205.04	178.356	291.147	240.096	231.407	192.509	209.489	177.619	240.491	246.149	218.241	147.889	96.4641	103.126	170.472	159.466	159.196
429	209.456	202.422	199.097	216.202	229.357	230.499	198.952	148.837	179.41	182.196	195.808	203.917	264.526	237.91	237.757	121.739	117.369	110.434	207.626	204.451	178.525	214.996	181.567	185.654	180.767	218.345	190.282	213.369	204.888	173.045	206.282	179.753	290.53	240.637	230.142	192.8	206.441	176.661	238.071	246.582	216.306	148.682	96.4091	102.79	170.166	158.154	163.279
430	209.34	203.158	198.703	217.013	228.672	231.117	199.895	148.57	176.003	180.586	195.221	200.815	263.481	237.507	238.712	124.594	115.999	109.698	207.995	204.016	177.193	216.204	178.06	183.624	177.799	216.03	190.636	214.823	202.77	174.723	205.76	177.943	288.879	240.628	230.274	190.615	204.172	175.872	237.858	243.405	213.921	148.877	97.5306	102.759	171.486	159.014	165.423
431	209.261	203.15	198.163	216.572	228.122	229.105	198.751	147.174	175.233	182.15	193.841	199.599	263.507	237.441	237.762	126.761	112.766	108.344	204.16	204.235	175.648	217.934	174.189	184.245	172.757	215.944	189.114	216.325	204.626	170.359	200.746	175.803	285.666	238.807	227.037	193.304	203.245	175.217	237.62	243.64	213.543	149.363	98.1507	103.893	171.492	157.774	164.13
432	209.439	202.597	197.407	217.407	227.736	230.306	194.484	145.432	176.187	177.031	190.632	198.083	263.571	237.108	236.704	127.296	110.164	108.345	204.547	201.487	172.95	218.756	174.27	182.913	168.83	213.711	187.087	214.603	202.656	170.59	203.654	173.905	283.982	239.035	225.973	191.475	201.865	174.052	237.415	242.019	215.975	148.051	97.951	104.453	170.52	158.039	163.627
433	208.019	202.35	197.479	217.172	227.017	229.292	189.864	143.351	172.036	174.946	189.458	198.247	262.228	236.543	236.854	127.589	107.113	107.477	204.701	202.208	169.61	219.317	173.627	177.774	165.199	213.365	183.923	215.926	204.311	172.579	200.57	174.899	283.098	238.196	223.783	188.864	198.745	173.117	237.005	242.706	212.651	148.506	96.8963	104.271	167.707	155.11	160.467
434	207.589	202.866	196.415	218.65	226.698	229.411	184.62	141.204	172.575	171.627	185.95	199.267	264.102	234.942	236.844	124.261	106.205	108.182	204.649	203.182	170.683	219.866	169.857	170.571	165.342	213.819	184.607	216.275	200.685	172.247	203.2	173.939	282.744	238.642	222.01	190.575	195.432	176.834	237.846	240.979	211.634	147.71	97.4332	104.034	164.426	151.82	159.617
435	206.799	200.851	195.797	221.182	227.508	225.193	183.613	139.685	173.151	171.16	184.011	199.963	263.74	235.299	237.285	121.66	106.328	108.548	206.583	201.098	171.77	218.511	172.792	170.714	168.093	212.09	185.343	216.94	202.773	171.423	200.999	170.39	281.338	237.72	222.51	190.594	191.748	179.048	236.861	241.434	210.179	147.682	96.8303	102.854	163.272	149.178	159.742
436	207.931	199.991	196.062	222.324	227.32	222.864	181.385	139.497	170.899	172.387	181.341	201.256	264.068	234.34	240.451	122.261	107.254	107.574	207.003	200.28	172.483	219.685	169.134	169.874	171.501	205.537	185.495	216.843	201.605	170.801	203.811	172.645	279.999	236.007	221.332	192.877	184.949	180.426	236.569	238.507	208.22	147.158	96.4022	101.893	161.328	147.789	159.136
437	207.271	201.52	195.702	223.455	226.517	223.948	182.52	140.703	168.585	168.75	181.377	203.075	264.373	233.977	241.034	122.996	108.445	106.228	208.102	199.861	174.641	217.833	170.278	169.829	176.315	201.189	185.966	215.364	199.084	168.803	202.882	170.205	280.065	234.182	220.512	194.708	184.55	180.943	238.027	239.537	210.519	146.214	97.2446	100.016	159.651	147.816	160.84
438	206.691	201.3	195.049	224.566	226.452	222.797	185.521	140.16	166.066	167.692	177.834	205.644	263.761	233.842	239.039	123.196	107.595	104.651	208.532	198.498	175.011	215.617	173.145	170.541	180.403	200.519	184.994	215.794	201.099	170.289	195.647	171.757	277.567	230.909	221.527	191.505	182.283	179.261	236.722	237.83	208.891	145.611	96.6838	99.6588	161.5	144.036	161.211
439	207.379	201.182	193.8	223.495	224.158	221.302	186.17	139.824	163.793	165.333	176.575	202.043	262.962	234.228	238.737	124.72	105.69	104.157	208.645	199.421	172.987	211.14	174.405	170.828	183.23	198.166	184.451	216.301	201.134	168.563	198.055	170.856	275.24	228.195	220.845	188.833	179.038	179.212	234.899	239.489	209.338	144.792	96.4761	99.2417	162.923	143.259	160.015
440	206.25	200.888	194.008	223.127	221.528	222.042	184.414	137.503	167.005	162.011	178.17	203.713	262.979	234.59	236.721	128.296	106.607	102.407	207.34	198.01	171.364	207.323	177.029	174.828	184.968	196.86	184.079	216.236	198.867	168.243	199.032	169.032	275.093	227.615	219.911	185.995	175.733	180.193	236.38	237.654	208.811	144.348	96.199	99.07	163.646	141.526	156.911
441	205.261	200.799	194.665	219.871	216.378	219.675	186.717	138.811	172.99	159.077	175.099	202.358	263.73	235.217	235.156	128.131	106.453	99.8216	206.643	199.766	168.796	206.975	178.447	171.683	182.839	200.875	183.824	210.675	201.168	168.311	199.177	168.186	274.519	225.367	218.453	186.104	172.751	183.149	235.43	237.366	206.161	144.161	95.903	98.4995	163.002	143.376	156.398
442	205.324	201.849	193.767	217.483	216.319	220.18	187.481	139.844	176.459	155.587	174.55	199.55	262.814	235.789	234.664	125.961	104.707	95.5494	206.011	199.663	165.899	206.937	177.958	167.633	177.196	205.248	181.371	210.569	203.015	167.333	194.473	170.255	273.056	222.756	218.652	186.751	170.74	184.617	236.472	236.059	207.326	143.42	96.9887	98.3768	162.423	145.218	155.984
443	204.703	202.44	193.112	215.649	216.32	222.102	180.993	136.767	174.089	157.816	176.589	198	262.153	235.102	233.567	124.175	103.617	94.4223	204.778	197.845	164.311	207.903	176.579	164.072	173.124	209.173	183.932	209.313	202.808	166.712	192.776	171.897	273.241	222.729	217.88	185.6	169.872	181.931	236.22	234.161	208.354	142.233	96.8086	97.2513	162.158	147.366	154.423
444	205.232	200.118	192.271	213.046	216.438	223.041	182.468	136.188	171.536	157.769	175.417	195.845	260.382	236.239	233.607	125.23	101.701	95.235	201.525	197.956	160.961	206.201	176.396	164.663	173.186	210.247	181.514	211.211	203.323	168.715	195.35	169.297	271.61	221.434	216.332	182.381	167.683	179.155	235.259	233.285	207.065	142.698	96.4171	97.2069	161.124	148.629	150.647
445	204.987	201.234	192.203	210.885	216.251	221.853	181.564	140.013	168.995	156.964	177.628	195.694	261.637	236.095	233.213	127.56	98.97	94.2385	198.281	195.847	158.99	206.908	178.879	166.751	171.714	213.248	180.94	208.579	202.854	170.08	195.141	168.789	271.021	223.889	215.803	179.622	170.753	179.246	234.768	234.328	208.956	143.369	96.9513	96.7178	159.838	146.773	147.609
446	203.996	198.923	192.013	210.794	218.437	220.625	183.683	140.827	164.798	159.038	176.748	196.991	261.819	235.041	233.472	128.782	97.243	94.7144	195.872	194.356	157.3	204.589	182.957	168.334	172.273	214.085	177.371	208.159	202.036	170.123	195.265	170.467	270.326	223.812	216.519	178.689	169.539	179.097	235.834	234.486	204.919	142.414	96.1267	98.8117	162.603	144.341	151.225
447	204.303	199.18	192.665	208.769	218.186	218.982	184.368	137.77	168.744	160.103	172.557	195.745	261.078	232.807	233.432	128.288	95.7265	97.7442	193.817	193.716	159.29	201.592	184.686	167.122	169.348	210.404	175.674	206.843	203.659	167.419	196.412	172.861	268.552	222.848	213.866	177.062	169.206	173.448	235.229	235.687	203.248	141.292	94.678	97.6434	160.56	142.728	152.281
448	204.419	198.987	191.353	208.709	217.123	220.878	184.241	137.286	172.404	164.322	170.778	195.77	260.29	232.049	235.168	128.619	93.6667	96.1009	193.272	192.029	163.121	197.966	186.753	165.351	167.747	207.036	176.413	210.733	201.23	162.598	193.252	169.899	267.682	222.887	214.422	176.255	170.231	173.727	234.73	235.006	205.601	142.039	94.8259	95.5513	160.072	138.294	152.716
449	204.959	197.217	190.973	209.091	212.647	220.285	182.508	137.218	174.352	165.536	171.803	196.706	259.811	232.722	235.09	128.107	91.7387	95.7532	191.53	189.77	165.611	194.737	186.496	164.309	164.193	204.573	174.544	210.788	201.152	164.255	196.01	172.579	267.774	222.517	211.802	173.488	168.103	173.925	233.929	233.312	205.056	140.99	94.4341	94.8948	158.91	135.466	149.918
450	204.191	195.933	190.361	208.372	210.878	220.663	177.482	135.739	174.2	165.527	171.374	196.408	258.763	232.262	234.861	127.856	89.8249	93.5576	190.757	187.58	168.958	195.73	184.913	165.602	164.614	203.212	177.853	210.672	199.41	166.516	196.669	171.597	267.012	219.113	211.896	173.433	163.484	174.182	230.927	231.248	207.217	140.937	93.9593	94.2719	159.399	134.543	147.084
451	204.397	196.659	189.724	205.975	208.867	219.305	172.646	134.185	172.651	163.829	168.807	196.476	257.194	231.583	233.613	130.199	91.4313	92.1614	189.894	186.063	168.99	195.365	185.747	163.571	164.525	201.49	181.097	207.926	195.64	168.024	194.748	173.506	267.823	217.973	211.217	171.981	164.444	175.434	234.153	225.649	204.543	141.033	93.2717	94.8093	158.716	131.306	146.883
452	204.825	196.165	190.122	202.565	207.309	219.572	166.319	136.924	168.452	163.419	171.811	199.229	256.839	230.226	230.592	129.214	95.6391	91.0412	191.265	185.278	171.27	196.571	186.412	159.973	163.575	202.747	181.964	207.208	196.673	169.647	195.232	169.972	266.206	218.472	212.64	173.263	166.921	173.589	233.936	228.762	204.371	139.861	91.8754	95.6533	159.047	128.385	147.427
453	204.195	197.057	191.747	205.432	207.013	220.986	160.497	136.312	160.854	164.336	171.464	195.702	256.144	230.599	228.796	127.453	97.0932	90.5708	193.879	182.932	173.415	197.238	185.644	157.12	162.066	204.52	183.806	204.636	196.029	166.296	197.388	167.847	266.304	214.55	213.427	172.424	167.208	174.282	229.407	227.349	198.824	139.763	92.3474	95.7594	158.26	131.233	149.011
454	204.139	196.49	191.973	206.742	208.414	222.225	155.691	134.63	154.129	165.18	169.84	190.491	253.34	229.786	227.64	127.541	97.2166	91.459	193.085	184.533	177.825	193.555	183.112	154.4	158.063	205.849	181.712	205.24	195.072	169.662	195.21	170.645	265.968	215.978	213.176	172.207	167.35	170.95	228.087	224.963	197.937	138.732	92.1607	95.6212	157.737	132.728	150.504
455	204.102	195.036	191.514	207.803	206.867	221.083	151.617	130.106	152.31	165.29	170.747	188.396	253.458	228.222	226.989	126.919	98.3277	91.2152	191.97	183.118	177.371	195.78	180.902	150.94	155.588	207.033	178.151	203.271	192.509	169.221	192.69	169.884	265.324	214.795	215.243	169.262	164.503	169.504	231.158	223.799	197.187	136.55	92.5919	95.2206	158.161	131.606	149.717
456	203.417	194.698	191.247	210.828	208.924	220.836	147.308	127.237	150.611	167.724	171.996	186.909	251.498	226.859	229.291	123.595	97.0049	90.7528	190.285	183.407	174.965	198.668	178.117	148.679	155.406	206.293	174.347	206.733	190.539	166.338	192.865	169.578	265.544	213.044	212.986	168.592	162.593	167.33	229.661	225.303	194.432	136.157	92.6039	94.0005	156.935	130.434	149.874
457	203.48	194.402	192.649	208.9	207.761	221.385	142.495	125.459	148.048	173.534	168.482	184.127	249.425	227.235	228.29	122.181	98.5341	87.1651	190.524	184.062	173.054	197.537	174.128	148.709	156.912	206.445	173.165	204.671	189.853	163.717	191.848	169.608	265.13	212.139	211.585	171.526	160.433	167	231.866	222.564	194.732	135.556	92.4723	94.4531	156.977	131.904	149.427
458	202.625	192.528	192.234	208.145	207.423	221.726	139.851	124.297	148.727	171.825	168.564	180.175	249.126	226.625	226.755	122.369	99.5038	85.0443	191.782	183.178	172.004	198.517	171.027	149.622	159.969	208.01	172.538	209.099	190.448	163.423	189.732	168.068	265.026	208.883	210.986	174.654	161.724	167.179	229.664	220.972	193.645	134.388	91.3478	93.8702	155.751	129.044	147.577
459	202.586	193.123	191.927	206.494	206.747	220.635	139.959	127.443	152.35	169.133	168.41	176.642	247.614	225.982	225.908	121.556	97.3293	82.3872	193.645	182.119	172.843	199.358	165.531	150.826	165.244	210.942	174.157	205.67	192.279	163.928	186.131	166.481	266.061	209.295	209.213	178.239	162.399	168.486	233.003	219.479	192.882	135.01	90.5184	93.4996	151.979	127.375	145.234
460	202.637	192.584	191.219	206.794	209.74	220.928	142.806	127.766	152.076	166.151	165.915	177.212	246.516	226.395	224.523	122.192	92.8844	83.6827	193.178	181.617	171.832	199.014	166.1	150.158	168.465	210.38	176.617	205.693	190.636	162.487	185.914	167.757	267.066	207.414	209.626	181.462	163.255	171.112	231.459	220.181	192.79	134.303	90.5407	92.4304	149.135	127.016	141.784
461	202.523	194.012	191.936	203.198	213.45	219.371	148.804	132.71	150.197	165.087	165.664	178.953	247.676	224.159	225.37	122.264	88.9427	85.2971	191.433	182.781	168.539	198.998	166.556	150.454	169.784	206.96	180.578	206.508	191.973	160.529	185.049	166.859	268.074	207.152	206.403	182.117	161.873	168.205	230.882	219.93	196.274	133.832	90.4453	90.9448	151.604	129.641	139.124
462	201.991	191.723	192.081	201.104	215.545	218.74	147.451	136.501	150.553	163.1	162.125	183.882	248.964	224.226	227.231	123.812	84.9839	88.6598	188.987	183.106	165.086	199.345	164.817	152.398	169.43	204.033	181.933	207.192	190.477	159.59	186.034	166.98	269.438	208.279	207.54	183.173	158.586	162.336	232.041	218.413	191.82	133.352	90.3233	91.1276	153.473	129.22	136.568
463	200.791	194.007	190.559	200.353	216.926	218.602	145.656	137.477	148.928	161.257	159.705	181.369	248.949	224.509	226.261	125.007	81.2744	90.3352	189.767	186.821	160.946	197.542	167.368	153.322	167.167	199.436	180.516	203.439	188.397	159.932	182.678	163.417	268.523	208.931	204.844	181.518	159.128	160.119	232.001	215.391	190.861	133.75	89.7037	91.0463	151.08	128.84	137.598
464	201.274	191.596	189.84	199.302	218.239	216.893	141.056	136.254	144.278	162.57	163.187	182.725	250.341	225.231	226.278	124.853	80.0143	89.0049	190.584	187.117	155.378	197.583	165.742	154.076	167.215	197.499	179.012	204.654	189.701	157.777	178.624	159.898	267.339	205.873	204.982	182.13	161.435	158.789	230.591	215.671	194.397	135.107	90.9189	89.8846	152.414	129.016	134.22
465	200.13	192.463	188.608	197.401	216.146	217.394	140.041	137.974	141.877	161.94	165.048	178.908	250.949	224.93	225.73	121.804	82.3873	87.2501	191.082	188.652	149.031	195.159	167.244	152.882	166.11	192.656	177.09	201.67	192.032	154.363	191.048	161.39	265.988	207.576	202.385	177.751	166.8	153.637	231.795	216.066	196.992	135.24	90.269	90.2941	153.516	129.946	134.969
466	199.413	193.743	188.53	193.64	217.043	216.018	135.221	135.542	140.88	160.844	166.908	177.706	251.252	223.143	225.683	119.17	82.8306	86.0108	187.177	188.342	148.077	191.09	166.811	148.253	167.597	191.182	172.828	199.727	192.51	155.368	189.411	161.295	265.422	205.309	202.102	174.43	168.54	148.095	230.825	215.708	196.399	136.437	91.3392	89.8173	155.747	127.623	132.786
467	199.404	192.922	188.632	192.76	214.831	214.859	129.909	131.362	134.656	158.376	171.942	180.229	249.089	222.609	223.989	116.391	80.1995	84.5887	182.543	188.463	149.723	189.882	166.25	144.685	168.222	188.156	173.143	198.386	192.03	154.371	186.409	161.607	266.563	209.27	202.168	174.255	167.906	148.791	228.779	215.844	195.733	136.73	91.7818	89.1931	155.541	125.648	132.691
468	199.561	193.015	188.589	194.855	213.392	215.851	123.404	126.199	132.609	159.343	171.412	179.394	248.926	219.875	222.795	115.068	77.9769	84.0669	180.312	188.623	153.269	189.113	166.825	143.142	167.874	186.116	171.162	194.028	190.673	156.075	188.17	160.574	262.585	205.679	205.376	170.549	168.463	149.503	228.67	217.03	196.741	137.895	92.1936	88.1276	154.643	125.653	132.299
469	199.601	192.268	189.555	193.077	209.884	214.001	124.606	126.433	131.228	162.247	172.379	179.762	248.036	218.22	223.617	111.504	77.5552	82.7706	177.438	188.885	155.539	186.048	168.828	143.175	163.924	185.903	170.53	192.187	190.857	156.471	190.613	159.995	263.672	206.354	205.446	171.056	168.064	147.618	227.193	220.026	198.203	136.583	91.6408	88.256	151.987	123.906	132.483
470	199.942	192.788	188.109	192.481	208.725	212.685	121.76	125.929	136.305	159.364	170.654	180.442	249.342	216.072	219.757	108.127	77.9871	77.937	176.514	189.079	158.511	187.386	166.25	140.804	159.34	187.732	169.191	192.928	189.286	153.544	191.393	161.103	262.993	203.906	203.457	171.925	165.4	147	229.216	221.697	197.419	135.848	91.4732	88.5096	147.87	121.781	133.897
471	200.263	191.345	190.732	192.349	208.267	210.745	124.175	124.954	137.925	153.354	172.798	181.772	246.171	214.721	220.71	104.669	83.5596	75.6565	178.485	189.345	156.445	184.673	164.555	139.258	158.367	188.566	168.818	191.881	185.096	154.153	189.149	159.166	264.689	203.289	203.985	170.74	163.008	146.077	230.367	222.294	198.546	136.338	91.2008	89.0659	149.183	120.696	135.065
472	201.053	191.846	191.898	193.712	208.03	209.305	129.147	121.203	137.638	147.936	176.662	182.985	246.516	213.07	219.406	102.92	90.2371	73.1703	178.196	189.717	155.049	190.327	158.332	138.919	160.616	190.293	167.995	191.543	186.944	151.296	189.521	157.808	263.654	200.237	203.957	171.964	160.089	145.036	231.041	223.342	199.617	136.384	91.2739	90.3493	149.05	118.062	135.491
473	200.855	191.321	192.437	192.543	208.001	207.85	141.39	118.407	137.943	142.885	177.125	181.511	245.351	214.365	219.686	103.207	96.8526	74.241	179.831	191.511	153.068	189.264	153.586	139.147	159.372	191.563	166.383	189.482	189.266	148.91	188.79	156.204	261.811	198.213	202.674	170.461	157.105	142.821	229.459	222.504	198.888	136.47	91.5617	89.8674	146.629	117.271	136.599
474	201.207	191.942	192.191	192.359	207.057	205.893	148.194	114.543	138.016	138.739	177.907	179.947	246.56	213.279	218.51	104.641	101.461	74.5358	183.67	189.398	153.94	188.176	151.066	138.53	156.802	194.46	162.366	187.873	187.082	148.262	188.825	153.978	261.221	199.915	202.038	172.083	153.803	142.95	228.161	222.522	197.966	136.754	90.5445	89.9201	145.422	118.442	136.139
475	200.82	191.589	191.763	190.772	204.016	207.206	149.978	112.633	139.76	136.072	174.704	180.534	247.295	211.931	219.491	105.656	101.761	71.5178	188.292	188.796	154.264	181.528	150.146	136.984	152.343	196.732	158.899	187.995	187.174	150.597	187.447	152.171	261.258	201.011	201.563	171.438	154.642	142.678	229.977	222.114	198.643	136.652	90.1881	88.8085	146.215	117.906	139.542
476	200.509	188.429	190.344	187.497	203.025	208.852	149.755	110.302	139.271	136.02	172.351	185.046	248.348	212.386	218.475	107.546	101.181	69.2367	187.708	189.217	154.794	179.03	150.887	134.768	146.265	196.985	157.287	185.066	186.778	152.238	188.594	149.472	262.038	203.643	199.659	172.053	157.362	140.796	231.969	222.242	198.797	135.881	89.3519	88.2645	147.213	116.339	142.747
477	199.401	191.08	190.469	184.303	200.401	207.13	144.871	109.251	133.266	139.228	172.559	185.18	250.729	212.581	217.616	109.968	98.3051	67.109	189.751	188.774	154.074	179.844	149.473	132.595	142.938	199.439	155.368	189.317	187.692	151.063	187.077	148.311	261.512	204.286	197.761	171.198	158.289	140.916	228.668	222.398	198.474	134.897	88.7744	86.7696	146.846	117.658	145.258
478	199.11	190.852	188.957	181.067	202.237	207.1	143.008	110.59	131.603	138.771	173.625	185.254	250.818	213.304	218.83	109.53	94.5254	65.6543	186.931	189.48	151.947	179.7	149.249	130.024	137.983	201.924	157.049	190.59	185.763	152.075	186.19	146.394	261.03	204.363	200.301	171.819	158.019	137.671	228.826	223.621	199.637	134.752	87.7994	88.6295	145.566	118.648	145.152
479	199.065	190.26	190.864	180.259	201.862	204.325	144.13	113.375	133.349	139.709	174.758	185.939	251.006	212.97	218.472	107.24	91.5462	64.2933	184.667	188.485	151.782	179.892	151.404	123.732	135.564	205.779	155.643	193.845	182.508	150.097	186.95	145.575	260.755	207.338	202.275	172.365	155.969	139.869	229.543	224.579	199.794	133.984	87.7043	89.48	143.581	116.648	146.061
480	200.626	190.841	189.947	179.076	201.627	202.314	149.391	114.245	138.522	145.861	178.318	182.737	249.761	212.504	219.155	103.603	88.8023	67.1144	181.75	186.601	152.237	179.955	152.154	123.78	134.191	207.163	156.72	192.734	184.583	148.591	184.848	145.951	263.328	209.389	200.173	174.267	155.363	139.786	226.807	225.189	198.963	133.063	86.8965	90.1283	147.481	113.973	146.686
481	200.439	190.659	190.434	174.756	201.384	202.792	150.338	112.367	138.306	151.211	179.799	181.218	249.504	213.376	219.571	102.048	86.9235	68.6327	179.786	185.406	152.596	176.983	153.083	125.916	130.883	207.699	154.108	196.316	182.869	147.984	183.656	146.129	259.083	208.018	197.177	175.572	156.548	140.961	227.367	228.6	198.894	132.538	85.6639	89.5778	149.144	110.102	147.979
482	200.046	189.881	189.809	170.956	199.636	201.449	154.114	107.773	138.859	150.041	182.83	181.462	248.869	212.941	219.179	102.016	86.1735	66.7286	178.688	185.872	152.613	172.384	151.906	124.288	131.189	206.958	155.168	194.198	182.176	150.459	185.894	145.793	258.41	210.01	195.219	174.655	158.611	142.355	227.716	229.473	196.633	132.644	86.9875	88.4615	149.823	108.244	147.55
483	199.353	190.41	188.668	170.557	196.402	205.226	158.471	106.189	137.838	151.031	184.976	181.115	249.098	210.936	217.647	101.062	84.031	63.3374	177.368	186.523	154.8	171.844	152.066	122.642	131.911	203.326	158.944	196.905	184.536	150.939	183.563	146.804	258.944	205.86	196.368	170.609	161.379	141.885	228.158	227.581	193.612	132.344	87.4312	87.7704	149.352	108.577	149.706
484	198.286	190.041	191.159	171.928	194.846	205.278	158.761	104.142	137.919	148.985	185.801	178.839	249.076	208.722	216.844	103.452	87.128	63.355	177.87	188.077	156.31	170.808	154.143	119.033	131.817	202.59	162.418	199.083	187.774	152.983	182.381	144.871	258.092	206.632	196.082	169.329	157.202	139.823	228.316	224.846	190.157	130.055	87.6301	87.3747	146.637	108.606	150.392
485	196.285	189.602	191.521	177.442	192.664	206.85	155.885	102.343	137.557	145.71	186.032	176.164	251.002	210.593	216.548	106.406	88.4073	63.4945	174.628	188.165	157.867	172.614	157.782	118.913	133.567	198.663	161.595	203.262	187.236	149.352	183.504	145.397	258.008	206.803	196.338	167.344	154.725	138.835	228.746	228.846	191.68	130.943	87.4598	88.8793	144.443	108.483	153.891
486	198.621	189.941	191.798	184.805	188.382	208.804	158.275	104.528	142.53	145.491	186.342	176.147	251.936	211.03	217.251	109.288	89.6634	61.2658	176.298	187.366	160.064	174.5	161.451	120.537	137.817	197.245	163.319	206.457	186.371	151.613	182.391	142.953	258.951	204.615	194.914	164.69	154.361	141.153	229.465	229.25	188.867	130.192	86.2662	89.99	141.272	110.449	157.34
487	198.684	189.381	192.75	188.441	186.057	209.787	161.634	108.323	144.343	139.797	185.524	177.897	253.592	209.698	218.105	108.945	88.431	62.317	175.584	186.681	162.614	178.383	160.388	123.219	142.308	193.477	163.004	208.74	186.3	153.419	179.867	142.028	257.946	203.639	191.808	163.397	153.393	138.805	228.596	227.438	187.233	130.382	85.0777	91.6433	139.248	108.653	159.648
488	199.063	189.841	193.442	191.617	184.81	207.996	160.989	116.5	145.003	136.143	187.569	177.868	254.476	208.969	220.388	106.773	86.61	64.6719	173.442	184.872	164.575	176.497	159.688	124.893	143.382	192.737	162.979	209.792	183.874	155.76	182.442	142.107	255.926	201.857	193.169	166.29	155.353	137.379	232.145	229.217	182.154	130.534	85.2043	92.122	137.717	106.711	159.32
489	199.148	189.681	191.694	194.367	184.455	207.094	155.39	123.547	146.38	133.764	189.643	180.487	252.483	208.567	219.151	103.655	84.3803	67.379	176.273	185.55	163.027	175.236	158.503	125.965	142.268	189.221	165.614	209.667	185.276	154.85	181.547	140.27	253.797	204.474	189.814	166.679	151.348	138.675	231.187	230.38	182.892	129.491	84.4108	91.8338	135.767	107.932	159.212
490	200.484	189.96	191.797	197.439	187.693	205.672	151.615	128.291	149.621	133.416	184.872	182.629	252.776	207.009	216.871	98.7128	81.2545	68.1134	176.219	183.099	160.983	174.821	158.229	130.334	143.339	186.792	166.712	206.459	184.599	156.67	180.084	140.273	252.946	203.134	189.664	166.217	151.167	137.813	229.679	229.375	179.021	128.898	84.3572	92.5453	136.385	107.425	157.574
491	199.418	189.321	192.16	198.922	190.474	202.195	146.281	126.452	151.173	136.183	185.251	185.465	252.799	208.584	217.619	96.3988	77.6099	68.0617	178.378	178.76	160.723	172.522	155.423	131.107	143.924	182.057	167.971	205.611	184.972	152.963	177.731	139.107	252.747	205.91	187.562	167.176	155.03	138.417	227.888	228.076	177.44	127.703	84.85	91.276	136.74	105.981	158.855
492	199.736	189.556	191.439	201.175	191.391	200.931	143.372	125.753	148.669	141.825	183.529	185.728	253.543	207.896	218.514	93.1401	77.7953	66.097	180.417	174.527	160.762	171.301	155.453	129.995	139.381	176.406	171.756	207.341	183.708	154.096	175.457	143.157	249.887	207.358	188.473	168.099	154.743	134.889	224.209	226.035	179.41	127.784	84.9339	90.362	137.168	106.837	159.14
493	200.106	187.443	190.556	202.864	192.83	198.318	141.656	123.833	145.928	142.687	181.175	188.526	252.167	205.824	217.34	90.4199	80.6179	64.7538	183.711	171.958	162.977	172.068	158.544	126.035	135.374	171.426	172.235	203.945	185.41	153.372	176.551	143.453	248.126	208.361	186.894	166.626	151.787	133.33	224.554	228.771	178.016	127.861	83.6792	89.3068	137.095	109.25	159.084
494	199.735	187.424	189.295	199.981	195.841	194.368	139.644	119.149	142.732	144.539	180.948	186.526	251.649	204.904	216.495	88.5378	85.5907	62.6881	186.379	171.745	166.569	173.906	155.573	127.474	134.565	167.019	174.513	202.635	183.879	151.095	176.284	142.601	248.504	202.884	187.178	168.519	150.73	136.164	225.365	231.086	175.962	128.422	82.7331	88.9641	137.022	109.772	158.355
495	200.043	187.914	190.482	201.506	198.898	194.028	136.376	114.049	138.364	146.388	180.399	187.257	251.918	205.619	218.625	87.8028	90.7344	61.673	188.099	171.379	167.115	176.824	154.295	127.63	136.034	159.241	177.107	201.126	184.683	150.336	172.686	140.495	249.135	203.391	183.641	170.992	148.544	138.113	225.002	233.417	174.171	129.267	81.8827	87.8905	136.114	111.097	158.596
496	199.484	186.428	189.602	202.298	201.015	195.519	135.458	107.679	133.852	146.675	182.149	192.103	253.317	206.14	216.224	88.2564	93.4379	58.9589	189.395	176.1	167.048	179.598	152.371	125.494	137.86	155.417	176.018	200.41	183.806	150.616	174.491	141.198	248.833	203.532	185.051	174.442	148.443	137.259	224.802	232.049	174.822	128.066	81.6656	87.5286	138.811	108.82	157.105
497	199.776	185.639	189.722	205.29	200.595	194.552	133.511	104.379	130.781	145.709	179.675	194.056	254.861	204.684	214.776	88.1644	91.3673	56.8087	188.517	178.699	163.833	179.522	150.921	120.81	139.236	156.133	173.275	199.394	179.644	152.895	174.329	142.594	250.594	204.154	185.569	174.233	147.135	136.951	219.86	232.43	175.083	127.192	82.3039	88.1452	139.468	108.038	157.68
498	201.035	186.597	188.718	205.583	198.953	195.29	130.482	105.44	129.327	147.595	180.133	195.514	254.944	205.329	214.087	87.209	90.1923	54.6761	188.894	179.665	164.394	180.979	148.469	118.01	142.033	158.489	173.081	198.272	180.924	152.855	175.579	144.786	250.035	205.917	183.487	175.992	146.091	136.507	221.48	230.874	175.857	127.188	82.1305	89.4652	138.837	106.967	157.97
499	201.49	186.702	189.013	205.059	201.563	198.334	127.998	111.312	131.064	144.654	176.796	196.739	255.259	207.329	210.626	89.0354	86.3013	52.9355	184.78	181.812	162.794	183.143	146.086	116.346	146.929	163.94	173.108	196.963	177.867	151.931	176.063	146.051	250.136	205.291	181.849	176.747	144.461	135.712	220.096	230.55	177.298	126.684	82.2915	90.4421	137.173	104.269	157.3
500	202.496	187.678	188.395	205.121	200.199	197.416	132.752	119.262	134.543	140.757	178.069	195.634	253.216	205.218	211.002	91.6732	84.4715	52.74	180.621	183.447	163.48	181.88	144.146	121.558	151.328	170.851	171.565	199.63	179.474	153.11	175.858	144.835	249.505	204.607	179.646	180.21	145.075	138.444	221.365	228.435	177.513	125.429	81.3542	90.2333	135.274	101.402	157.402
501	203.016	186.834	187.26	203.812	199.679	198.861	137.744	123.225	140.354	136.702	179.035	195.9	252.085	203.751	211.737	95.8204	84.0592	53.9541	176.987	184.537	164.445	182.271	143.275	124.995	151.245	176.071	169.98	197.131	182.613	153.474	173.495	144.39	246.793	200.141	178.758	181.027	143.267	136.997	223.155	230.113	175.559	126.053	81.0264	89.2609	135.485	101.352	154.268
502	202.339	186.026	185.103	202.798	195.031	200.98	141.208	124.333	148.719	137.391	179.004	196.379	252.659	204.697	213.207	101.605	86.0146	52.0052	173.406	186.523	163.351	182.249	141.408	128.781	159.494	179.022	171.14	201.399	182.393	155.041	171.224	142.034	246.545	201.458	178.979	183.292	142.269	135.569	224.774	229.648	174.247	124.548	81.582	89.7303	131.998	100.938	154.584
503	202.499	185.949	186.433	202.05	193.145	199.038	140.804	122.127	151.205	140.297	178.879	194.599	252.168	203.295	211.552	103.525	84.8784	52.7417	170.173	185.842	162.038	179.979	140.906	130.118	165.774	183.35	169.527	200.354	181.697	157.854	172.397	144.629	247.972	199.132	180.047	183.499	140.079	133.01	223.816	230.413	175.573	124.536	81.5779	87.8554	134.19	101.278	150.749
504	201.198	186.032	186.563	202.102	191.875	197.938	135.749	119.753	149.141	141.381	180.515	192.156	252.374	201.632	210.201	103.479	83.3576	54.1674	167.8	187.838	160.385	183.481	143.788	130.64	168.2	179.926	166.725	198.539	183.61	160.272	170.174	142.116	247.714	200.496	178.064	181.771	137.318	133.568	226.908	227.238	172.417	124.286	80.7274	88.0365	135.987	101.243	149.221
505	201.408	185.991	186.866	202.172	187.522	195.01	133.215	118.64	140.964	141.467	179.146	191.447	253.413	201.691	209.271	100.351	81.1664	55.702	170.449	185.145	161.171	184.304	146.435	129.403	168.602	180.519	164.098	198.21	181.465	159.708	169.628	142.506	247.641	198.963	174.35	179.47	137.681	131.451	226.143	229.085	172.693	123.001	80.8429	86.8768	137.232	100.504	147.644
506	200.616	185.789	188.836	201.133	187.266	193.514	133.295	114.814	136.329	140.134	180.409	191.679	252.364	201.026	207.26	94.554	77.6839	56.4031	169.096	185.895	161.442	185.277	149.725	128.982	164.981	177.677	163.357	194.813	180.679	162.209	165.129	142.601	244.682	198.379	174.843	180.723	135.91	129.423	222.795	230.371	172.18	122.866	80.5083	88.651	138.817	101.34	147.934
507	199.427	186.998	188.568	202.191	187.357	196.996	137.475	114.968	129.849	137.072	181.683	189.392	251.431	202.019	204.689	90.9564	73.6075	56.1439	167.212	188.199	159.896	184.204	151.554	127.888	158.697	178.142	159.71	192.01	181.159	157.115	165.037	144.014	245.779	198.881	174.524	181.09	135.439	126.697	224.291	230.652	171.967	123.536	79.6006	88.8954	140.403	104.607	146.664
508	199.176	187.689	186.925	204.361	183.965	195.962	138.535	112.424	125.212	133.932	181.444	187.968	251.931	202.285	201.253	87.6616	71.4638	54.4635	163.34	192.306	157.599	182.714	154.706	128.222	154.882	183.843	158.894	191.056	181.035	154.834	160.818	142.53	244.9	196.249	175.164	180.564	134.763	124.832	220.651	231.522	170.376	122.771	78.8218	87.1491	141.268	103.404	145.89
509	198.216	185.677	188.45	204.071	181.167	194.419	136.924	111.861	121.612	131.145	181.15	186.427	250.544	204.486	203.263	85.2725	68.3941	53.6341	162.939	192.095	154.622	182.715	159.437	129.402	150.001	191.8	157.904	188.31	179.618	156.18	160.361	139.382	244.509	195.396	173.5	177.573	133.943	124.953	223.322	230.42	167.045	123.446	79.1919	87.1412	139.453	103.557	143.731
510	198.904	187.314	189.072	203.538	180.212	193.411	132.785	113.127	120.053	134.627	178.994	181.379	250.405	203.568	202.496	85.2773	68.0532	52.0818	164.378	188.529	150.92	181.003	162.896	128.728	145.816	197.86	155.09	188.574	182.052	151.82	163.378	138.294	244.791	196.185	174.266	179.032	136.254	127.612	226.623	230.655	166.65	121.247	78.413	85.4076	137.829	103.905	142.223
511	196.51	187.65	189.33	200.713	180.86	191.264	128.318	111.73	118.8	138.501	177.188	179.24	251.428	204.08	201.094	86.9028	70.9731	48.5292	167.921	184.443	148.335	179.982	161.791	130.058	140.614	199.357	154.993	187.493	179.483	150.039	160.25	137.815	242.496	194.874	174.505	179.539	135.386	128.072	229.477	232.501	165.278	120.871	77.9968	84.8294	136.772	103.827	143.583
512	197.753	187.563	188.572	196.941	181.033	190.855	126.172	109.909	118.468	138.856	173.61	179.713	249.736	201.943	199.538	91.6	72.7478	47.4709	172.232	184.294	147.279	177.442	160.432	127.953	138.181	198.834	155.537	185.202	176.73	153.141	157.145	137.806	240.331	192.789	176.614	178.52	133.634	128.143	229.076	232.488	167.339	119.549	77.2037	85.4613	135.369	106.8	141.545
513	197.416	187.584	189.127	194.42	181.79	187.508	122.765	104.684	114.821	137.945	169.073	181.876	249.076	203.583	197.893	94.0653	73.021	45.6259	176.502	181.594	142.707	180.087	162.421	119.21	137.658	195.491	159.511	183.343	177.858	155.054	158.71	135.244	241.765	190.951	175.765	180.338	135.458	125.564	225.482	231.205	169.241	120.111	76.3705	83.9339	133.034	106.63	138.121
514	196.688	186.093	190.251	192.26	181.649	185.975	119.895	100.212	111.652	137.224	164.926	184.607	248.072	206.268	196.573	94.1701	71.3028	46.5216	179.671	179.848	138.375	182.223	161.405	115.716	136.886	192.073	165.674	185.083	175.904	153.299	160.337	134.782	241.242	192.591	174.637	179.882	132.118	120.156	229.19	229.752	171.302	119.425	75.6398	82.9117	131.779	103.614	137.616
515	195.85	186.898	190.08	189.042	181.431	187.723	118.529	93.9503	106.811	137.194	162.071	184.619	248.74	206.319	196.391	95.3555	68.9668	51.3828	179.746	178.224	138.315	186.461	160.999	108.615	134.322	187.756	168.416	186.388	175.141	153.034	155.524	131.577	238.886	190.052	172.115	179.934	134.041	119.517	225.774	229.062	171.12	120.661	75.0653	83.3025	132.307	101.407	136.408
516	196.106	187.046	188.764	188.958	180.995	186.519	114.707	93.7814	102.791	134.78	160.398	180.647	248.641	206.577	197.199	100.522	66.4199	57.8014	179.933	178.593	138.707	189.468	160.588	104.503	130.185	180.934	174.533	184.801	175.183	153.569	153.511	130.547	239.252	188.125	172.869	177.536	131.229	118.049	226.851	226.479	171.071	120.879	74.4034	82.871	133.947	103.061	137.517
517	195.376	186.706	189.163	184.517	184.561	190.906	112.134	94.3069	100.669	131.565	161.751	179.992	247.865	205.98	195.046	104.33	65.2641	60.9204	179.643	181.559	140.297	189.966	160.522	100.255	129.141	179.638	177.119	188.264	174.377	154.233	157.619	128.567	239.387	184.561	175.195	177.989	133.616	121.232	224.77	228.767	172.269	121.258	74.6472	81.834	134.73	101.53	137.222
518	196.421	187.252	188.82	182.334	188.514	191.844	108.676	97.8514	96.4573	133.285	160.757	174.62	248.139	205.092	194.877	102.476	65.0277	60.6878	182.644	181.294	141.915	184.701	161.594	98.9482	126.08	178.377	176.98	186.256	170.827	154.72	158.481	129.019	241.271	183.324	171.965	180.132	136.887	124.356	224.258	226.164	173.035	121.059	75.56	81.2989	134.786	101.16	136.43
519	195.337	187.27	188.102	183.625	192.024	192.661	108.127	103.276	93.9823	136.312	160.284	168.623	248.079	205.832	192.276	101.159	67.9593	57.5333	182.916	183.415	142.152	183.385	159.633	101.928	126.005	174.073	177.001	188.202	168.894	154.406	158.026	129.388	240.831	182.397	173.982	180.443	139.329	129.892	224.403	223.917	171.484	120.137	75.3713	80.5569	133.881	101.954	134.956
520	195.051	186.303	187.921	182.567	192.902	190.888	106.805	108.397	91.3019	140.078	159.535	165.212	246.968	206.508	193.086	98.6677	69.3077	53.6835	184.326	183.667	144.704	181.968	161.984	103.285	126.874	174.084	174.556	186.591	171.272	154.587	157.167	128.547	242.118	179.242	171.836	179.801	139.248	134.775	224.703	224.955	170.249	119.737	75.5703	81.2358	134.908	107.037	134.482
521	195.329	185.946	187.837	182.135	196.79	190.623	111.24	110.936	91.3309	143.206	155.498	162.319	246.059	204.527	192.895	97.2427	66.9324	50.8404	184.512	183.944	149.085	177.627	163.866	102.962	128.131	179.285	166.287	184.978	174.217	152.595	154.826	127.672	242.198	177.422	169.346	181.356	137.567	135.275	227.491	224.761	169.337	119.302	76.0417	81.2611	132.415	108.416	134.787
522	194.143	185.771	187.962	180.195	199.377	191.052	115.345	113.575	96.0557	142.277	152.92	162.235	247.786	205.248	194.51	93.4757	65.5719	49.4006	185.649	183.069	151.457	175.59	168.503	105.7	130.735	181.447	167.724	182.398	174.956	151.36	152.825	129.436	241.538	173.257	165.886	178.58	136.15	134.164	226.41	221.799	172.752	120.617	75.7374	81.4179	131.44	107.14	134.238
523	194.594	185.645	187.07	177.911	200.588	190.138	123.86	110.964	99.2569	144.199	152.817	163.162	247.465	204.779	191.806	89.5796	63.4354	48.2232	187.894	183.856	153.673	172.35	174.395	109.127	131.854	189.779	166.963	183.175	174.476	150.582	149.469	130.721	242.585	174.03	163.202	179.057	135.829	137.553	225.231	223.565	170.673	120.327	74.5981	79.905	131.303	104.544	131.022
524	194.865	185.199	186.891	177.008	204.494	189.356	133	110.087	101.565	147.117	153.989	167.158	245.664	203.164	192.452	87.6987	63.5315	46.1928	186.041	183.156	156.114	168.007	174.421	117.312	128.646	194.516	166.41	181.887	175.774	148.356	147.549	126.952	244.512	174.759	162.057	178.233	135.79	137.508	224.662	219.842	175.481	120.964	74.6158	78.9414	129.56	104.917	132.413
525	194.704	186.87	186.469	179.67	205.291	190.424	140.007	112.532	101.719	147.158	157.131	168.557	244.604	200.692	191.549	86.3635	66.1349	45.0573	181.149	180.576	158.638	168.44	177.312	121.344	124.75	197.138	166.228	183.615	176.677	151.715	145.477	130.443	245.474	174.849	160.141	175.933	137.095	136.829	225.852	217.562	176.511	121.06	73.9826	80.2275	127.257	104.782	134.442
526	194.167	186.469	185.513	180.145	208.871	191.546	145.911	117.637	98.9358	147.647	160.457	165.996	245.295	198.288	190.72	86.8959	66.3617	44.8404	175.534	179.366	160.305	166.154	179.811	127.3	119.803	197.931	161.987	182.702	177.323	152.535	148.227	132.016	246.93	173.879	158.94	175.639	134.301	139.833	226.578	217.89	175.86	120.205	74.5328	80.45	125.926	107.114	135.13
527	194.325	186.395	186.433	185.144	208.43	190.122	148.401	120.637	101.141	146.994	162.979	162.511	243.224	197.437	193.015	87.4929	67.8376	46.8472	169.975	177.534	157.829	168.048	179.762	131.338	118.086	196.347	160.635	179.099	180.407	152.125	145.809	130.105	246.718	174.537	161.699	177.073	131.881	139.153	227.438	213.51	174.582	121.073	74.5738	81.5215	126.717	105.317	135.753
528	194.329	186.267	185.691	183.985	207.959	191.691	143.537	121.028	106.817	145.551	168.916	159.995	244.062	195.585	192.093	86.3875	65.6135	50.8153	165.47	176.65	160.354	169.079	176.324	132.574	115.467	192.374	157.658	181.54	178.586	151.042	146.088	131.806	248.842	178.304	161.833	177.008	129.909	143.219	226.593	214.635	173.359	120.767	73.9291	81.7602	122.17	105.082	133.432
529	194.443	186.98	185.566	182.049	206.674	195.204	133.564	121.859	113.283	147.758	170.469	159.373	243.364	195.311	192.944	87.2304	65.0627	55.5526	163.174	175.127	162.64	167.998	172.68	132.407	121.142	189.493	156.291	182.513	176.216	150.88	148.07	131.872	247.145	180.769	160.607	178.37	127.127	141.763	227.881	214.038	172.624	120.354	75.6571	80.793	120.28	106.589	136.768
530	194.513	185.989	184.952	179.789	206.173	196.868	129.637	120.401	119.963	145.91	170.974	161.778	245.295	194.624	192.169	85.2011	66.0545	58.9433	166.056	177.349	160.706	168.556	166.494	130.126	126.836	191.427	156.086	183.769	172.169	148.212	149.569	132.701	245.385	179.419	160.504	178.939	129.304	139.379	226.468	211.125	172.012	121.107	75.3405	79.8712	118.97	106.597	138.519
531	194.134	185.739	183.9	179.843	202.193	199.496	127.241	117.098	118.778	137.195	170.212	164.288	244.364	194.252	191.721	83.5608	69.8078	62.5758	168.6	179.768	158.003	170.465	160.589	130.47	133.902	189.271	156.385	182.889	174.237	148.038	149.209	132.483	245.358	183.082	163.1	177.964	127.945	143.056	224.971	212.244	175.63	121.027	74.8098	80.2829	119.154	108.96	142.712
532	194.411	186.312	184.362	180.882	201.259	199.27	130.243	110.63	119.295	132.696	171.239	167.677	242.323	196.723	191.896	81.0628	76.1114	66.3977	170.331	180.51	156.091	174.407	156.117	126.905	140.688	183.478	155.521	180.236	174.846	145.188	148.487	131.541	245.047	184.3	164.349	179.398	130.019	145.014	224.255	209.951	180.329	121.653	74.5285	79.4872	118.264	114.596	144.018
533	194.247	186.343	183.618	182.495	202.084	199.981	131.11	105.519	121.249	130.055	171.367	168.482	242.74	195.199	194.216	80.1567	82.0436	67.8155	172.156	179.857	152.267	175.12	152.682	123.206	147.414	179.825	152.147	182.658	172.816	143.152	147.388	129.658	246.12	189.739	164.165	178.817	128.768	145.547	225.391	211.388	182.608	121.355	73.9486	79.4026	114.997	116.122	146.426
534	194.992	186.261	183.182	182.435	201.837	200.469	130.97	99.1337	120.956	127.848	171.273	168.904	243.549	195.591	195.451	82.0632	87.8638	67.905	168.913	180.382	147.097	172.017	154.632	116.092	147.426	177.146	149.965	185.835	175.396	143.132	148.799	127.26	245.978	190.045	162.433	180.842	128.711	146.608	224.212	208.585	185.774	119.976	73.4056	79.1406	114.172	119.26	148.447
535	192.779	187.474	181.483	178.682	203.506	201.176	130.899	95.6525	116.437	133.099	172.507	168.811	243.25	194.47	197.06	82.8512	86.5946	65.7244	166.709	179.452	142.868	169.372	159.702	110.571	150.164	181.054	146.682	186.148	175.856	142.762	147.537	125.137	246.345	192.657	164.253	177.674	127.148	145.909	223.92	209.427	184.09	119.278	73.3066	80.9994	112.682	116.731	150.799
536	194.79	185.307	182.951	177.839	206.554	202.513	131.755	93.5165	108.836	132.163	171.533	168.272	244.523	193.851	195.591	82.2976	82.0921	63.7204	165.897	182.131	139.92	167.992	160.278	107.453	153.159	186.179	142.504	191.043	173.152	145.416	147.156	127.472	245.28	193.035	164.736	175.159	127.935	144.167	226.419	208.573	185.313	118.412	74.7213	81.0791	111.73	114.989	150.366
537	194.377	188.355	183.25	180.037	209.336	203.118	133.67	89.0285	104.969	132.172	172.336	165.206	243.77	191.883	196.646	80.6976	78.6677	62.1379	164.545	184.355	137.644	168.636	158.818	102.235	158.363	188.654	137.802	193.581	174.42	145.242	146.341	126.041	246.093	190.892	164.231	172.172	124.84	141.711	224.452	208.454	186.873	118.294	74.5404	81.7015	109.171	114.397	149.855
538	193.607	187.02	183.062	183.161	210.714	203.229	131.171	84.7738	98.3548	130.256	173.382	161.992	244.925	191.92	197.865	77.7715	73.8318	61.5164	164.676	183.227	136.2	169.103	158.664	98.6267	161.213	189.08	136.277	193.15	171.464	143.255	149.587	126.934	247.124	189.807	163.867	170.809	127.517	139.454	226.769	207.354	185.893	118.54	74.2859	83.2457	110.668	111.699	147.096
539	193.891	186.39	182.429	187.159	211.57	203.47	131.756	83.1062	95.7624	127.006	175.122	159.205	244.9	189.539	197.838	73.0798	73.892	61.4053	163.862	184.857	137.971	169.418	159.4	101.429	160.455	189.095	136.248	195.117	172.923	145.587	146.482	127.464	246.498	190.734	162.403	165.981	129.492	137.358	223.972	206.534	184.419	117.921	73.2103	82.3684	110.005	107.178	148.268
540	194.283	188.152	182.131	193.152	210.088	202.6	125.953	79.55	94.6081	122.31	175.546	158.959	245.496	188.514	200.867	71.4308	73.2589	62.1193	162.975	184.849	140.766	171.694	160.501	100.693	155.947	186.052	139.335	196.252	173.051	142.407	146.427	126.181	246.19	189.878	163.57	164.85	128.506	134.089	227.16	207.906	183.633	117.73	72.9898	81.4371	110.302	105.477	150.919
541	194.223	187.987	181.101	192.097	210.056	204.048	118.853	75.852	92.3408	122.385	175.124	160.213	245.491	186.968	200.116	67.1271	73.4272	60.5877	164.442	181.728	143.916	168.538	162.135	106.001	151.203	180.341	143.269	198.757	172.432	143.74	146.603	126.506	246.778	190.41	161.483	165.545	124.137	133.242	225.551	208.187	184.41	118.378	72.1267	80.4251	109.748	102.304	152.443
542	193.459	188.437	181.268	189.286	206.988	206.049	113.638	76.1719	88.4787	122.088	177.206	156.51	244.008	185.73	200.012	65.8687	73.876	61.1102	168.022	178.768	147.768	166.826	162.375	108.164	147.682	178.763	146.947	198.417	175.487	149.438	150.368	129.908	244.794	191.613	162.137	168.407	123.4	129.766	225.199	208.299	181.594	118.016	72.6321	79.8139	109.549	101.03	147.612
543	194.032	188.408	180.928	187.354	207.622	206.015	108.973	78.0883	89.2891	121.214	178.138	153.311	243.529	186.936	198.462	66.3483	70.991	60.065	172.643	175.846	149.131	162.901	165.373	110.724	148.199	178.859	146.443	199.48	174.851	150.596	150.983	126.656	241.567	190.421	163.723	172.982	122.022	125.624	224.163	206.621	183.789	116.746	72.2708	80.3531	111.005	99.2266	146.081
544	193.736	188.502	179.707	184.548	209.007	205.771	105.682	79.5245	93.1064	122.374	180.003	150.125	242.734	188.417	197.81	68.1162	69.2526	60.4335	178.605	172.397	152.45	164.568	167.899	113.23	153.003	180.319	150.616	197.811	176.969	150.799	148.954	126.226	241.982	188.434	163.847	175.486	122.696	119.999	224.002	204.471	185.849	117.18	72.3597	80.6112	113.364	97.9778	146.224
545	193.392	188.01	181.409	181.362	209.303	205.174	107.071	82.2998	100.146	123.468	180.447	148.911	243.29	187.35	198.617	66.8768	68.5714	59.4714	178.464	170.446	152.248	164.166	168.483	112.779	156.121	183.031	153.803	198.946	175.433	156.947	149.638	126.273	243.498	186.764	162.734	177.045	123.605	119.358	225.806	201.745	183.864	116.738	71.6584	80.1976	114.98	95.5057	146.734
546	193.005	187.824	180.189	178.51	210.453	205.012	111.79	85.9906	104.307	126.295	183.02	151.3	243.617	188.038	195.111	65.1676	68.6827	57.0845	175.945	166.578	150.851	164.392	171.406	112.08	154.955	185.25	158.543	197.696	172.334	158.677	151.853	125.913	244.637	185.883	162.548	174.795	124.84	117.925	225.236	198.33	182.473	116.18	71.5593	80.2802	115.334	94.5377	146.003
547	192.934	186.09	180.374	177.941	210.327	206.689	114.408	86.6947	104.844	125.11	184.56	153.915	242.414	187.886	196.304	63.1367	67.7976	53.0175	172.925	164.786	152.41	164.459	173.964	113.698	148.686	188.295	164.579	196.714	171.513	159.098	150.235	127.664	243.073	181.98	162.193	177.067	128.236	119.96	224.613	197.746	182.057	114.585	70.5591	81.7922	117.372	96.056	144.526
548	191.63	186.391	179.477	177.247	209.965	205.66	117.415	83.7879	106.731	120.244	185.434	155.245	243.437	189.46	195.776	61.7935	63.8104	50.2322	167.775	163.181	155.288	160.874	172.879	114.095	142.249	191.447	172.051	195.419	170.472	160.985	151.95	125.111	241.993	180.562	161.397	176.833	130.323	124.64	225.329	196.185	179.571	113.205	69.5539	82.7463	121.65	98.5802	145.095
549	191.587	187.534	180.047	174.367	209.619	206.183	116.833	77.9338	109.613	116.866	186.942	157.932	243.065	189.513	196.734	61.3095	61.447	48.8652	168.07	162.928	156.663	162.101	167.679	113.086	135.237	194.842	172.128	192.739	171.448	163.661	149.49	125.783	243.897	182.298	159.721	176.414	131.716	125.615	226.729	194.981	178.944	112.084	68.3664	81.6939	124.911	98.7033	142.753
550	192.374	187.458	179.383	170.99	210.311	206.345	112.234	77.1649	112.656	117.323	188.215	158.736	240.493	190.032	197.188	60.0101	59.9886	47.2301	169.177	164.737	159.928	159.699	167.049	109.896	133.117	193.217	175.19	192.855	173.609	164.963	147.581	122.348	243.118	181.123	160.636	174.763	133.534	127.711	223.154	192.892	177.408	112.813	67.2447	82.2509	122.991	99.997	144.319
551	191.786	185.66	179.245	169.195	208.611	205.431	110.265	74.2778	117.271	119.65	191.426	159.311	241.672	189.449	196.194	60.987	59.334	48.1587	170.934	165.536	160.919	162.448	165.848	109.533	133.716	195.778	178.103	192.015	175.992	170.097	149.376	118.416	243.926	182.663	164.823	170.992	134.136	129.499	226.392	192.202	175.753	112.55	66.2123	81.8324	117.771	101.546	148.286
552	191.519	186.115	178.342	169.512	208.59	204.518	110.233	75.4349	120.428	114.679	192.17	159.595	243.229	187.698	195.085	63.2706	58.9138	49.1556	173.66	168.152	158.528	165.08	165.588	107.822	137.107	193.648	175.677	191.252	176.488	167.476	149.945	117.742	244.769	180.977	166.261	169.36	132.598	131.785	223.915	190.412	176.099	112.175	65.6887	82.1229	115.536	102.387	151.289
553	190.718	187.094	177.681	173.057	208.434	205.108	110.64	77.3815	120.994	113.977	193.654	158.805	241.432	186.784	191.414	69.4156	59.2916	51.2372	174.63	167.91	158.404	166.154	163.172	104.768	137.158	195.668	172.912	191.709	178.754	171.909	149.866	116.468	243.128	178.877	167.918	168.014	131.695	130.105	222.621	193.267	178.611	111.16	66.1713	82.2696	114.213	101.388	153.142
554	190.059	186.845	177.006	176.078	207.634	205.66	115.213	80.7275	122.873	118.948	193.137	160.401	242.675	186.406	190.191	76.2449	58.6036	54.699	173.86	170.308	153.092	165.359	160.215	102.743	138.942	201.555	170.619	188.214	177.049	174.263	150.686	116.435	242.652	179.92	167.573	166.151	128.78	126.847	224.884	192.486	179.909	109.659	65.611	81.4934	117.413	98.0778	152.455
555	189.794	185.782	178.098	184.396	206.934	203.737	123.367	81.56	120.895	124.509	191.978	159.808	241.508	185.235	189.312	81.6534	57.3893	55.3718	172.2	171.522	149.683	164.543	160.284	103.741	142.761	205.861	168.116	189.132	180.586	175.16	148.871	118.33	241.265	179.457	165.059	166.304	124.423	129.11	224.231	193.507	181.717	109.388	66.0066	82.0684	117.155	98.3985	150.652
556	189.343	184.563	177.848	185.996	206.867	204.936	134.602	84.4223	114.735	129.628	195.646	160.661	242.023	183.738	189.79	85.0995	56.1404	55.6572	173.631	172.267	145.732	162.337	157.5	104.401	147.159	207.492	164.597	186.412	179.109	175.384	147.192	116.628	240.375	177.369	163.95	168.72	120.284	128.346	224.21	193.134	182.145	108.775	67.4255	82.3694	118.397	98.5188	148.92
557	187.865	184.857	176.857	186.22	205.583	203.737	142.485	84.4926	107.526	133.547	192.514	159.918	239.817	183.321	187.698	83.7238	54.2892	57.3285	175.078	173.184	144.086	160.565	156.713	108.591	144.494	210.55	162.452	188.284	181.917	173.822	147.337	116.535	239.746	177.86	164.943	173.422	118.244	127.187	221.985	193.26	180.76	108.638	68.7819	82.3153	120.43	102.407	147.316
558	189.073	185.813	175.268	186.097	205.356	205.916	143.736	84.0145	99.655	134.327	195.528	162.053	237.973	184.667	185.421	80.2082	53.5884	58.025	174.897	172.059	139.793	160.456	157.703	110.73	140.272	210.399	157.865	187.998	179.844	174.965	144.473	118.712	240.421	180.999	164.899	174.812	118.531	128.214	219.953	198.591	182.487	106.734	70.9907	81.2454	123.663	101.939	147.03
559	188.591	185.047	175.599	187.855	204.659	206.093	140.605	81.9298	94.4875	135.141	195.912	163.84	237.571	184.004	184.455	77.8479	55.51	56.7866	175.946	169.903	136.597	156.214	157.261	109.577	136.866	211.032	158.712	184.935	182.592	174.76	142.715	120.714	239.114	180.377	165.683	178.033	119.323	124.74	219.04	197.768	181.622	107.779	70.65	81.5163	127.021	100.63	146.476
560	189.404	185.122	175.303	186.487	204.003	205.348	139.884	79.0626	91.963	132.78	198.371	163.22	236.843	185.671	184.338	74.357	60.4867	54.2337	176.297	168.568	132.936	151.934	155.184	104.716	134.302	213.757	160.227	186.455	183.788	173.37	140.154	121.93	238.105	181.892	166.391	179.805	119.029	122.756	217.716	198.003	180.632	107.02	69.3781	80.7942	127.838	95.7886	144.168
561	189.355	185.312	174.035	187.134	203.049	203.799	134.389	73.6907	89.5192	127.939	202.101	164.662	237.408	186.285	185.183	72.1345	61.5436	51.6456	176.648	167.909	129.83	146.503	151.595	97.0773	133.574	215.22	157.925	186.066	183.027	171.836	142.43	125.182	235.675	183.576	167.502	180.764	122.6	121.562	220.504	197.172	182.681	109.408	69.5541	80.695	129.235	95.6476	141.657
562	189.385	184.073	173.432	187.609	201.227	201.208	131.744	67.1928	86.8009	124.096	203.641	163.006	237.107	185.895	185.085	70.8421	60.4682	48.272	172.631	167.707	129.238	144.295	150.853	95.5229	131.549	212.86	157.323	185.191	182.652	172.529	138.897	126.506	233.425	184.236	164.018	183.327	120.853	120.853	215.984	198.145	181.695	108.884	70.7711	80.2923	127.45	94.4245	140.539
563	189.08	183.741	174.409	187.748	205.416	200.142	124.805	63.9897	86.7613	119.784	204.007	162.675	235.77	185.353	185.008	67.3526	57.5593	45.2957	172.064	168.164	131.383	140.447	148.218	94.0884	131.899	209.516	156.303	185.465	179.417	170.705	134.761	128.251	233.068	181.86	164.312	184.835	121.164	120.9	215.401	199.796	179.331	107.68	71.7296	79.3916	124.498	98.0431	138.292
564	188.219	184.105	173.466	186.465	208.663	197.77	121.441	56.331	87.4422	116.079	203.099	158.595	233.499	187.167	185.371	65.8352	55.9505	43.8402	168.424	167.606	131.199	136.62	146.371	93.2397	132.964	208.229	157.869	186.453	178.739	173.998	131.935	126.205	234.298	184.429	164.145	184.017	123.244	125.364	219.461	197.685	179.739	106.737	70.9612	80.4318	119.765	99.6467	136.189
565	187.421	182.15	174.437	185.182	207.101	197.312	114.999	57.6779	89.5502	115.146	204.572	158.627	232.692	189.485	185.484	63.8443	53.042	48.0673	161.787	170.979	132.325	140.387	145.574	91.7324	140.61	205.479	161.004	187.266	176.921	175.903	131.43	127.497	234.297	183.57	164.284	182.448	122.812	128.257	221.141	196.981	180.022	106.381	71.6918	78.8355	117.586	96.1384	136.193
566	187.65	182.742	174.974	186.942	208.677	196.911	108.044	61.7722	91.7708	115.825	203.523	155.988	232.576	189.642	186.669	62.1279	51.9601	51.7044	162.098	170.099	133.473	144.08	144.969	88.3776	139.805	202.967	162.128	188.733	177.615	177.281	131.639	125.668	233.242	183.265	161.955	185.131	125.167	129.03	218.652	198.727	177.71	107.388	69.9731	79.3501	117.122	92.2313	140.804
567	187.454	181.962	174.445	190.14	209.571	195.099	102.933	68.1142	87.4398	116.683	201.142	155.704	231.634	188.648	185.214	61.2101	52.283	56.0301	165.696	171.534	138.364	144.193	147.276	87.7913	137.235	202.652	162.66	187.324	177.222	175.563	133.061	125.254	232.829	182.14	162.518	184.449	125.9	131.26	217.309	203.029	180.134	108.39	69.0555	78.5518	118.219	94.2388	143.869
568	188.025	181.29	173.781	191.328	208.858	194.863	99.065	72.711	82.4952	116.059	201.816	158.377	232.996	189.382	186.751	58.0607	54.9887	62.2957	167.373	167.123	138.873	142.572	148.329	88.027	132.721	201.803	161.724	190.917	176.462	174.026	125.847	122.638	231.844	183.669	161.642	186.086	124.738	129.401	219.778	202.942	183.5	110.588	67.5198	78.1864	122.178	102.346	146.275
569	187.968	181.538	173.197	188.974	209.38	193.677	97.6618	77.1648	79.8443	113.323	197.497	161.804	232.795	188.14	183.084	55.6392	56.8113	65.3692	168.382	166.01	139.488	143.477	150.441	85.6506	132.405	201.922	159.51	192.986	175.297	172.471	128.006	123.959	231.012	181.126	161.087	187.462	124.773	127.825	218.442	201.58	181.496	111.114	68.0284	79.0885	121.53	105.892	149.408
570	188.919	182.074	171.742	186.499	207.8	195.906	100.108	79.0035	77.362	109.558	197.832	161.713	232.286	188.779	183.384	53.7307	55.4062	66.5105	169.164	166.2	142.59	143.543	150.039	82.1093	133.039	203.402	159.729	192.894	174.363	171.409	127.663	123.555	231.498	177.263	161.562	186.112	124.083	124.258	217.986	201.107	180.922	112.994	69.193	79.626	121.577	106.181	153.918
571	188.265	183.004	174.166	184.934	209.739	198.508	100.775	80.6854	78.6058	107.51	197.093	165.064	231.31	187.69	183.633	50.4144	55.5987	65.1693	167.894	163.821	148.364	142.183	148.823	79.9254	133.314	202.455	160.257	189.378	174.194	170.871	127.828	121.447	234.744	176.881	162.097	184.627	125.21	123.166	218.811	201.088	182.095	115.363	69.5516	79.3398	119.785	104.091	157.681
572	188.857	182.285	173.541	182.972	210.427	203.181	98.9029	78.6814	80.2	108.497	194.853	165.22	232.39	190.408	184.62	50.462	53.2924	62.2438	166.802	160.963	152.344	142.363	148.829	80.2716	136.673	200.031	159.033	191.274	177.621	169.691	129.498	120.32	234.543	175.332	163.762	184.001	123.902	124.349	219.045	197.171	179.735	114.314	69.0245	79.3947	114.55	102.822	160.853
573	188.63	183.721	174.708	184.314	208.784	206.309	97.7536	72.6769	77.5479	106.048	197.318	163.324	231.595	190.946	184.314	55.4838	50.9743	61.1182	162.774	159.818	156.583	144.856	152.961	83.5551	139.128	194.505	158.429	191.545	170.949	171.371	125.188	123.553	234.981	175.545	165.223	182.236	124.723	124.143	219.024	197.987	179.927	114.434	68.6511	79.0732	109.747	99.4221	164.968
574	188.05	181.647	175.03	186.248	206.612	204.156	97.863	72.6047	75.9617	101.855	200.978	159.847	233.342	192.034	185.074	61.0541	48.5189	59.9922	159.489	159.477	159.71	145.633	153.739	83.9927	140.568	194.122	157.954	188.682	175.975	171.93	128.466	119.927	235.205	175.796	163.676	183.758	123.824	124.308	221.654	198.763	181.628	114.314	67.432	78.2452	108.046	97.4826	168.615
575	186.464	183.346	176.291	184.217	204.439	205.784	94.6109	72.3552	74.3236	100.281	199.94	160.242	235.198	192.24	184.684	68.7031	48.8084	59.0134	157.609	160.153	164.284	141.9	153.221	87.9873	143.766	190.221	155.45	189.394	175.624	168.358	128.642	121.879	234.254	176.202	161.924	180.192	118.826	121.271	219.691	196.46	182.709	114.459	66.6457	79.7978	108.501	96.2262	167.5
576	186.54	182.396	176.674	181.153	200.939	206.598	97.342	68.8118	72.6505	97.194	198.848	157.465	234.376	193.279	186.521	74.1536	48.1721	57.5567	155.703	162.241	164.83	141.743	152.064	90.2315	143.82	189.053	150.002	186.874	177.995	163.847	128.943	119.91	231.401	171.006	163.323	177.193	116.213	121.561	219.797	197.174	179.905	114.925	66.2742	80.342	110.79	94.2244	166.742
577	185.013	183.242	176.084	177.21	199.22	207.716	96.7202	67.954	73.3081	94.9861	197.33	153.987	233.8	193.649	185.477	78.8818	48.6993	56.158	157.323	163.084	162.24	142.337	147.441	91.1878	140.139	187.697	145.945	185.304	177.556	163.368	129.281	121.18	233.078	172.135	165.31	178.345	114.574	120.453	221.646	193.825	179.477	114.291	66.5015	79.7395	111.371	91.7474	164.025
578	185.918	183.498	176.284	175.021	199.057	207.85	101.33	63.5178	71.4556	91.8924	195.813	148.953	231.966	193.311	184.318	81.1007	47.1929	53.2961	158.506	165.257	160.983	141.53	145.903	94.1404	137.633	181.762	148.898	182.38	179.96	161.818	130.093	118.256	235.416	171.577	167.395	175.404	114.017	118.691	220.253	195.822	176.91	115.427	66.345	78.4659	109.341	91.7615	164.559
579	186.832	184.211	176.05	173.162	202.47	211.129	100.238	63.7562	70.2018	90.2606	196.46	150.117	231.071	193.921	184.608	80.219	50.4669	50.5704	161.329	165.329	159.204	143.198	146.697	95.3597	133.067	178.556	150.149	183.533	179.156	161.046	130.843	116.364	236.924	169.535	166.635	172.903	114.213	122.15	219.309	196.363	176.933	115.148	65.1891	78.2402	109.473	92.3938	164.353
580	186.796	180.67	176.118	169.316	205.171	215.436	100.947	61.9937	73.8698	92.7484	193.173	148.095	230.426	193.847	183.213	75.9997	56.0388	49.3325	160.811	163.104	158.408	141.968	150.532	96.6866	129.105	174.138	150.775	185.395	179.177	161.767	131.88	113.387	237.166	169.02	167.284	172.283	118.357	124.296	219.964	196.414	179.044	114.914	65.576	77.8248	109.809	93.1992	164.106
581	187.028	181.414	177.02	166.826	205.22	217.475	100.278	61.1216	76.8801	95.8689	190.595	145.768	229.406	192.639	185.845	72.2332	58.468	47.0446	160.509	164.099	158.615	142.319	150.985	96.5977	129.025	174.663	148.662	184.931	178.376	160.345	132.504	113.693	234.611	169.074	167.216	172.154	112.531	126.072	217.917	197.132	175.688	114.988	66.2839	77.9006	109.362	90.4976	162.498
582	187.873	178.548	176.031	163.421	209.508	218.746	102.896	56.3459	80.5992	99.6516	191.334	148.479	230.72	192.116	186.408	69.8485	60.3318	45.1909	157.353	163.758	159.636	144.448	153.316	98.7414	131.063	176.528	147.1	187.946	180.629	161.754	133.559	113.067	234.141	169.139	167.749	172.93	108.186	128.579	217.704	196.524	173.837	114.681	66.0916	77.5877	110.654	88.5872	162.721
583	186.311	179.441	174.327	158.918	210.617	214.922	105.061	54.6919	81.4873	107.879	186.682	149.595	230.367	193.257	185.252	68.446	60.5419	48.3536	154.218	163.786	156.656	145.722	153.633	99.9628	136.002	181.876	147.573	187.553	181.377	163.362	133.892	112.601	234.679	170.138	169.177	171.343	102.971	128.528	219.011	196.715	175.107	115.673	65.164	78.1715	113.002	88.7015	162.951
584	186.366	179.219	174.434	154.888	212.538	213.003	105.195	55.7054	84.1034	114.398	189.95	152.475	228.422	193.18	186.014	69.7663	61.3973	50.1297	148.742	164.926	154.194	149.73	150.311	103.203	139.311	185.761	148.408	189.161	182.904	162.291	135.97	115.185	234.676	172.064	168.757	171.834	100.389	125.737	217.869	198.181	173.507	114.586	64.5414	76.2946	118.831	88.873	160.676
585	186.678	178.924	174.187	151.29	214.091	213.539	103.716	56.3842	87.4435	121.813	191.405	155.46	229.564	194.412	183.938	70.8293	61.5919	51.9324	146.651	168.397	152.361	151.409	147.836	105.341	138.808	185.181	149.101	187.013	182.299	158.653	132.167	113.663	234.812	172.39	167.923	170.186	98.2683	126.504	216.854	199.126	174.26	113.681	63.6909	76.384	121.149	88.9471	162.642
586	186.976	179.85	174.752	147.665	212.326	210.884	103.866	59.9844	84.8214	121.525	192.718	157.411	228.296	194.336	185.061	69.1593	61.6911	55.4524	145.025	167.928	153.02	154.001	145.246	106.557	138.588	178.494	154.132	185.426	185.966	158.55	133.626	111.809	234.922	174.856	167.512	170.89	101.189	125.217	217.961	196.411	171.461	112.829	63.4561	75.9202	121.291	89.1473	165.471
587	187.363	179.757	174.882	145.246	212.114	209.781	106.092	59.493	81.4295	122.351	193.874	156.088	228.735	194.025	184.669	67.5167	59.1561	55.8237	143.936	169.125	156.239	151.502	143.43	109.148	138.276	174.851	157.647	185.009	186.323	160.374	134.456	112.325	235.052	174.656	167.838	167.368	103.727	125.025	219.338	196.232	174.425	112.945	63.1149	75.7091	121.504	89.2317	167.972
588	187.701	178.635	176.219	144.427	209.992	208.691	103.606	60.2514	76.6651	124.144	193.825	151.049	228.691	195.138	185.738	64.9035	55.661	55.4923	143.613	165.405	156.595	149.819	142.455	104.708	137.525	172.493	158.907	186.063	184.409	158.109	131.627	111.147	232.995	170.76	164.734	169.005	107.466	125.168	220.395	195.418	176.431	111.941	62.9519	74.2863	120.92	88.6405	172.111
589	188.757	178.977	177.267	144.716	209.717	210.438	101.191	67.5803	77.8294	123.929	192.181	149.868	229.054	196.918	188.202	61.8478	51.5909	55.3738	142.073	164.945	157.602	143.736	142.238	106.304	135.344	171.892	159.526	186.015	181.406	157.726	133.152	110.31	233.621	172.853	165.867	168.822	110.799	125.317	219.483	195.016	177.697	111.592	63.0523	73.0831	118.305	92.0999	171.119
590	188.775	178.385	176.991	142.573	210.522	210.564	100.079	74.818	84.1349	122.758	195.231	147.265	227.55	197.606	189.178	58.3745	48.937	55.0367	139.591	160.023	155.961	139.148	141.771	109.066	130.257	170.699	162.763	185.312	178.956	159.023	135.76	116.18	233.314	172.683	164.193	169.025	112.976	126.222	221.364	193.277	175.353	111.287	61.9342	71.142	115.192	93.2198	170.025
591	189.036	177.878	176.4	138.717	212.129	213.695	98.658	78.3628	85.0687	116.975	193.591	146.119	227.161	197.081	185.465	55.9995	46.9838	53.8488	135.914	158.805	156.811	136.459	141.402	111.38	128.587	173.053	163.829	186.289	177.228	158.32	135.415	113.991	230.424	171.302	163.653	165.244	111.784	126.988	218.084	193.049	175.555	110.805	60.4473	70.8306	110.496	92.6689	168.636
592	188.793	177.389	174.688	136.819	211.875	215.587	94.1441	80.8278	84.3171	112.59	193.999	144.574	227.142	197.246	185.911	53.5371	45.9082	51.1039	135.417	158.368	154.591	134.453	144.394	111.926	125.43	176.139	162.805	186.587	174.247	158.312	135.317	117.508	232.607	169.08	164.28	166.918	110.047	127.575	222.75	189.137	176.574	111.223	60.1772	70.2269	106.935	90.9848	167.537
593	189.085	176.71	174.193	136.407	211.434	215.358	89.5863	78.9868	81.992	110.73	193.394	142.342	225.972	197.684	185.885	53.1928	43.8035	48.3241	136.141	157.683	152.203	134.283	142.551	110.225	120.272	180.201	159.537	185.489	174.339	157.559	133.398	120.662	233.237	168.125	161.365	165.719	108.167	124.601	221.272	188.257	179.182	111.715	60.499	69.9052	107.237	92.3795	167.067
594	188.883	175.922	175.964	134.599	209.948	212.427	89.2438	77.5807	77.813	108.776	195.577	141.283	226.982	196.535	184.751	51.7318	45.1748	47.8771	141.025	158.154	146.829	133.459	143.319	106.499	117.713	187.292	160.145	183.63	177.711	159.377	135.704	120.746	233.825	169.016	160.485	164.274	110.253	120.628	221.698	191.554	175.613	110.961	62.4722	69.7371	106.301	96.7206	164.963
595	189.904	176.79	175.779	133.305	208.806	209.431	87.5405	77.775	76.5511	108.793	196.107	138.716	224.904	194.821	185.136	56.8657	46.7809	51.2904	143.924	159.756	144.338	130.824	145.267	104.101	119.547	196.53	160.206	183.865	179.633	159.121	136.543	121.419	233.942	170.913	158.55	161.155	110.783	119.494	222.409	192.186	177.871	107.678	62.926	69.6975	107.006	98.7568	165.481
596	190.458	176.888	174.46	138.506	207.416	206.259	88.4751	76.0238	74.4229	105.366	198.678	141.868	225.398	192.836	185.64	56.9097	46.4364	58.9418	143.453	158.089	140.148	130.035	147.34	101.91	126.163	200.999	162.071	182.659	180.791	159.009	139.771	119.278	233.982	171.161	158.062	160.813	108.906	114.461	222.219	190.806	176.86	108.236	64.0947	68.6759	106.006	100.616	167.488
597	190.034	179.487	173.128	145.498	207.778	205.706	90.8657	76.3803	73.582	104.554	199.123	141.106	225.105	193.545	184.43	59.7492	47.2724	67.0345	141.644	159.107	139.854	129.628	152.662	95.5978	134.052	201.877	163.858	180.056	181.933	160.231	139.46	119.199	231.184	170.679	159.381	162.224	107.03	106.121	220.577	195.375	175.43	107.611	64.3965	67.878	107.852	100.292	165.583
598	190.819	180.077	175.009	151.762	206.748	204.143	95.3697	75.785	72.3822	106.673	195.387	145.399	224.787	192.546	184.325	61.4717	49.5977	71.656	137.123	159.086	138.359	130.638	156.903	96.1936	143.592	206.89	163.286	177.712	182.112	160.396	139.125	117.515	233.682	169.133	159.341	162.827	104.253	106.775	221.796	194.729	172.673	108.177	63.9558	66.3489	110.321	97.2608	161.697
599	189.775	179.751	174.313	154.149	204.6	204.518	94.6663	69.7266	73.1933	106.777	196.348	149.849	224.849	192.391	185.736	61.8643	53.4242	75.738	135.652	158.737	139.505	129.828	159.996	92.5658	147.096	209.169	164.827	183.333	181.968	163.616	140.83	119.042	231.696	167.758	160.377	164.687	103.062	107.625	221.721	196.064	171.959	109.652	63.0177	66.2004	113.804	100.225	159.193
600	189.835	180.081	175.033	152.275	204.966	204.708	92.4274	64.687	75.4126	109.159	196	151.755	225.737	193.196	187.497	59.3848	58.3537	76.4057	134.023	157.895	140.549	133.57	163.219	91.0613	147.337	208.436	167.521	184.689	183.959	161.04	140.2	120.473	231.946	166.359	160.308	160.988	100.602	107.723	220.734	194.173	174.616	108.842	63.0446	65.9689	113.758	102.797	157.976
601	187.915	181.568	175.089	148.524	206.771	201.58	88.4325	62.1289	80.3996	111.119	198.286	152.662	223.783	194.414	188.123	56.1319	60.3664	76.719	134.294	155.933	143.464	134.725	168.329	89.1616	148.218	208.433	166.769	186.001	183.078	161.395	137.955	118.582	231.017	168.644	160.695	157.515	98.0121	111.438	218.765	196.109	176.972	110.22	63.0567	66.5726	109.551	102.901	155.774
602	189.107	181.998	175.214	145.71	208.994	197.164	85.9941	60.6117	79.8917	114.585	199.716	152.04	221.835	193.704	189.327	55.5289	64.3303	74.394	137.132	156.936	147.488	133.838	167.385	87.5869	149.255	211.423	162.391	185.731	183.234	161.05	138.639	116.558	230.972	167.464	159.996	151.384	97.5629	114.648	218.281	195.418	176.513	108.544	61.9177	67.7037	107.855	100.22	153.458
603	189.205	182.323	177.107	146.354	209.693	194.455	83.6124	64.1319	82.8229	116.399	196.578	150.693	220.467	192.415	192.116	57.3735	68.6157	73.0703	138.697	155.87	149.667	133.571	164.741	88.9206	150.433	213.82	159.127	184.977	182.406	163.234	137.313	117.232	230.535	167.276	155.767	148.937	98.2815	114.27	216.895	195.423	174.657	108.521	62.1292	68.4551	106.023	96.703	153.25
604	188.568	182.442	178.643	148.852	208.942	192.771	80.2486	67.1298	86.3691	115.754	196.277	151.145	220.784	193.43	190.46	57.1907	72.2226	69.0018	138.695	156.297	149.911	134.436	158.561	88.0429	150.881	209.426	156.869	186.982	180.956	160.44	138.455	113.873	226.641	166.802	157.267	147.434	99.7362	115.506	215.256	193.157	172.58	106.481	61.6337	70.2392	106.307	94.5316	152.813
605	187.821	182.15	178.44	150.775	209.922	193.229	78.3932	74.8884	91.5109	115.935	194.557	149.817	222.186	192.797	190.129	57.6042	72.9567	65.9339	136.034	156.541	154.756	136.078	155.856	88.2565	148.848	206.043	156.445	187.669	180.119	158.966	137.301	112.218	226.768	168.205	156.001	147.661	100.199	117.301	215.798	190.987	171.914	106.218	62.0249	69.6749	106.844	94.3044	154.464
606	187.173	181.518	180.023	155.912	208.414	191.755	76.2568	77.8575	102.379	114.958	191.424	149.832	221.774	192.12	189.298	56.0632	71.6917	62.4838	133.923	158.414	158.455	135.352	153.169	93.3574	147.223	201.156	158.941	185.864	179.879	156.383	138.774	109.986	226.386	168.667	155.807	150.254	100.892	116.849	218.047	188.885	171.788	104.286	62.4715	70.408	110.369	95.8606	155.894
607	187.096	179.741	179.572	160.846	211.364	188.814	72.5748	78.0655	110.579	113.938	186.136	148.721	221.574	191.334	188.174	54.436	68.0785	58.36	132.159	159.905	158.806	132.46	150.572	100	146.066	197.153	163.088	186.644	180.598	154.916	144.547	109.726	225.376	169.692	158.626	152.271	100.294	119.578	217.617	188.983	172.144	105.107	63.0284	70.5481	113.301	95.0322	155.717
608	187.415	178.232	179.584	163.572	211.292	188.206	67.3609	77.0357	116.446	113.103	183.711	147.005	221.446	190.715	186.667	53.386	64.4655	55.4494	133.588	161.589	157.389	129.965	149.082	102.307	146.502	195.127	167.197	186.206	179.181	155.657	149.022	110.401	223.961	167.505	153.409	156.601	100.474	121.701	220.995	189.506	177.297	104.336	63.0436	71.5554	114.269	91.7251	156.757
609	187.687	180.353	178.941	163.851	212.078	190.216	65.2373	75.973	117.471	112.002	178.782	147.199	220.548	188.273	184.75	51.3694	61.54	52.5349	135.188	162.419	158.397	129.235	147.648	101.394	145.87	196.126	167.135	188.679	178.353	155.504	148.013	110.719	224.51	166.583	153.865	156.017	98.7295	123.947	218.092	189.717	179.578	104.404	63.9481	71.3882	111.519	90.4423	156.894
610	187.725	181.027	180.412	162.502	209.106	191.921	65.0001	77.4299	119.011	111.8	176.935	144.9	222.584	189.196	184.425	49.9325	57.0722	52.8716	136.204	163.781	159.091	130.856	147.127	99.7252	145.067	193.936	165.622	188.475	181.163	158.899	150.156	109.757	225.483	166.339	154.83	154.902	95.6598	122.539	218.741	188.615	177.74	103.119	63.7921	71.0471	110.852	88.4182	158.613
611	187.809	180.252	179.041	158.843	212.162	193.177	67.1083	74.323	114.394	110.445	172.849	141.713	224.508	190.265	182.436	51.566	54.2729	54.0937	139.619	164.998	158.947	133.461	141.251	101.157	143.096	193.937	165.282	187.112	181.264	159.025	150.846	112.55	225.038	165.896	155.044	153.589	95.9188	120.852	219.968	186.998	177.491	104.427	64.0385	70.6796	112.743	87.9027	162.102
612	186.83	180.336	176.769	157.387	212.139	195.606	72.193	71.0115	110.149	107.571	171.071	137.218	227.843	189.61	182.519	52.0388	49.416	55.3479	141.412	166.964	161.691	130.653	139.569	102.174	140.055	187.729	160.932	188.638	179.896	161.388	152.415	108.458	225.278	165.867	153.877	153.782	93.061	123.465	221.463	189.926	177.283	105.784	64.4884	71.0625	111.433	92.0031	163.218
613	187.304	178.128	177.674	157.422	213.714	197.009	73.0539	69.8098	104.194	102.736	168.201	137.887	229.474	190.198	183.678	53.8891	48.1872	57.6922	140.493	166.636	161.415	128.1	136.516	102.11	135.646	182.27	160.36	189.819	180.733	165.077	152.349	108.163	224.138	163.859	155.044	151.671	91.9447	126.909	221.773	188.551	171.902	106.689	64.0702	72.4495	110.323	93.604	164.151
614	186.8	179.357	175.512	161.949	214.694	197.386	78.902	65.397	98.4789	101.292	167.51	138.934	230.159	193.375	184.958	55.7546	50.4982	63.3168	139.274	167.898	162.739	129.44	135.286	104.447	129.752	179.655	160.911	191.799	180.18	170.83	154.327	105.732	221.689	164.126	151.77	149.284	92.4743	126.327	221.976	188.295	168.7	106.265	63.6479	72.0026	109.78	93.2916	167.308
615	186.482	180.038	176.679	168.087	214.702	195.79	79.5243	65.0853	94.8462	106.367	167.508	139.168	229.763	192.488	182.86	60.1904	50.483	64.982	139.862	166.253	162.288	127.758	137.263	112.187	124.45	178.621	160.902	189.011	182.377	173.136	160.187	104.603	221.59	164.692	148.015	147.099	89.4869	126.72	220.809	186.673	167.555	104.785	64.0215	73.3913	109.085	93.2162	168.862
616	187.03	180.288	175.734	169.763	213.075	197.18	81.8793	62.1748	89.2289	114.95	168.751	140.112	229.557	193.469	183.657	64.6943	54.13	66.2386	139.437	165.714	160.858	128.726	137.167	118.394	124.444	177.95	156.892	190.471	179.757	173.155	160.788	105.609	221.587	162.242	148.98	148.324	90.7755	128.905	221.864	186.532	167.318	104.107	65.1822	75.8659	109.302	89.3213	170.269
617	187.65	179.9	176.141	172.485	210.808	197.771	77.8512	59.6603	83.9892	118.193	171.885	139.704	228.823	193.506	184.606	66.4829	56.2666	64.678	139.517	163.377	160.645	128.586	137.037	123.079	121.847	177.921	152.507	187.189	180.367	175.056	158.986	103.179	220.325	159.83	147.903	145.566	88.8968	131.656	221.429	188.182	165.316	103.999	66.3226	76.5799	109.067	88.7215	173.875
618	186.65	181.205	175.934	173.332	208.563	200.434	72.3269	57.6756	80.0021	119.851	173.249	138.495	230.495	196.015	182.532	68.4733	56.8578	64.8862	139.033	164.327	161.832	128.928	134.634	128.464	120.418	182.028	150.87	186.908	178.3	172.823	156.125	107.412	218.086	156.958	149.267	145.988	88.1789	135.861	220.618	191.831	161.429	102.845	67.4388	75.349	110.583	84.6573	175.658
619	186.99	179.168	174.012	174.156	208.009	201.385	71.8108	55.8944	84.6496	118.431	172.327	138.116	230.536	196.763	183.889	66.4655	54.5864	66.4626	139.979	166.49	161.045	127.928	132.545	131.303	121.908	187.053	150.045	187.195	176.557	171.706	154.368	111.346	217.023	158.235	149.437	146.51	86.5642	134.802	219.096	192.439	159.873	103.235	67.9726	76.3048	110.541	81.5787	175.481
620	186.994	179.901	175.318	172.517	205.173	203.081	68.6624	53.135	83.9915	114.025	174.663	137.942	230.213	199.334	183.466	61.4236	51.1734	67.0618	139.349	165.449	159.06	126.02	133.146	130.142	123.493	190.373	150.759	187.602	173.7	170.193	153.067	114.639	217.5	158.521	149.629	144.608	87.7701	136.502	220.736	193.714	161.601	102.657	69.0145	75.3576	114.426	81.8037	175.509
621	186.993	178.107	174.337	170.817	202.25	201.738	63.6914	56.3423	84.0446	111.002	172.858	139.74	230.851	200.848	181.578	60.4135	51.2851	66.0728	141.227	167.323	159.388	126.118	136.216	127.583	125.573	194.996	150.709	188.585	175.353	171.174	156.232	116.545	216.929	160.187	152.246	142.494	89.6632	136.919	219.984	193.494	165.393	101.216	69.4404	73.2208	118.787	86.0973	173.691
622	187.13	179.439	173.472	169.968	200.459	202.251	61.2839	56.172	90.8514	111.04	173.973	141.496	230.103	201.223	181.131	58.2907	50.6081	62.5911	140.823	168.82	157.545	125.202	136.409	124.197	128.836	199.239	148.478	188.832	173.738	174.94	158.076	116.857	218.081	159.621	150.72	139.404	91.475	138.271	221.98	194.542	165.508	101.153	70.0047	71.7873	119.23	89.2878	172.41
623	186.859	178.418	171.673	167.731	201.233	200.898	58.0967	57.0164	91.3686	108.625	172.185	141.594	229.019	201.501	180.26	56.5361	49.0631	59.7809	141.812	172.863	155.884	124.23	137.323	118.863	128.361	198.896	148.043	194.716	173.399	177.213	159.694	119.469	219.427	157.987	150.396	137.959	93.0256	137.522	220.395	198.639	168.067	99.2153	69.807	70.3516	120.088	89.0288	172.448
624	186.953	178.888	170.99	169.671	201.442	202.614	58.8237	57.8462	94.7831	104.619	170.254	141.43	229.319	202.385	177.106	53.4309	50.1184	56.466	137.446	175.122	154.807	124.015	135.812	114.933	125.427	193.267	151.15	194.188	175.585	179.492	159.778	116.85	220.401	158.981	150.799	133.261	91.491	138.434	222.928	203.651	169.487	97.9375	69.7357	71.1479	122.198	90.3333	175.925
625	186.514	180.779	172.105	174.427	201.846	204.876	55.5218	56.4066	97.5126	104.21	170.499	141.909	229.713	204.368	176.976	50.2905	48.7024	56.3321	140.39	176.63	155.611	122.115	137.199	110.573	119.441	192.107	154.484	189.839	174.397	182.662	158.494	119.804	219.026	156.319	151.925	134.518	89.169	140.498	222.19	204.224	172.842	98.0376	70.0629	71.5041	120.36	91.5088	176.814
626	185.765	181.618	172.343	178.506	202.519	210.028	53.316	55.6626	101.206	103.505	171.712	140.783	230.326	205.983	177.739	49.5471	50.9688	56.2396	146.777	176.739	157.987	118.703	137.573	107.459	119.262	190.141	161.347	194.863	172.842	180.297	156.485	119.989	219.863	152.507	151.249	133.494	90.6662	135.779	221.612	206.846	173.59	96.8553	69.8872	71.782	119.368	93.9736	175.846
627	185.594	180.848	171.805	185.249	200.769	210.647	48.6619	56.5905	101.744	103.798	174.351	140.331	230.051	206.474	174.247	49.2617	50.1955	55.1024	151.516	177.508	159.363	118.699	137.741	100.691	119.598	185.998	166.439	196.831	170.551	178.691	155.548	121.301	220.61	153.661	148.792	132.972	91.5262	132.926	222.463	205.232	174.386	97.826	69.807	71.7999	120.262	99.7517	178.856
628	185.074	180.92	171.416	189.697	198.977	210.698	45.767	62.6608	99.6909	109.784	173.598	142.816	228.692	205.664	173.977	50.17	51.3583	55.6221	151.799	176.951	158.969	120.405	135.279	95.6099	119.325	181.323	170.363	192.684	169.925	176.608	155.147	118.443	221.853	154.223	148.694	132.398	89.1353	127.704	223.425	206.616	177.158	97.452	69.6803	71.4441	118.57	105.844	178.296
629	185.372	180.858	171.836	195.915	200.39	212.178	42.954	66.008	93.9619	120.412	173.883	143.141	227.359	205.585	174.216	52.719	50.7996	60.0632	150.895	176.55	157.797	123.02	131.619	92.259	118.626	179.783	173.19	195.995	169.515	176.974	155.531	119.577	218.592	154.56	146.451	130.604	88.7681	123.004	224.148	205.454	175.699	96.932	71.6177	71.2421	116.047	110.783	177.09
630	185.192	181.58	169.881	197.497	199.392	211.876	42.9062	68.1084	87.3591	124.149	172.359	146.459	227.715	205.202	174.146	53.7646	51.5027	64.7368	154.025	174.137	152.97	125.629	131.173	92.0951	116.741	175.544	174.475	195.425	169.561	174.631	154.857	115.609	219.799	154.088	144.954	129.244	88.6093	122.126	225.979	205.082	173.621	95.7476	72.1456	70.1609	112.986	113.062	175.893
631	185.297	181.259	169.407	196.436	198.563	208.942	45.5154	68.1485	80.2614	123.608	175.27	143.973	229.403	205.358	171.63	53.1062	52.2422	68.6463	155.86	172.565	148.987	128.301	132.076	94.7683	112.818	175.988	174.598	194.032	168.337	174.484	153.413	113.67	222.717	154.812	143.494	127.745	93.3045	121.544	226.302	205.827	172.292	96.4688	71.8047	69.9209	109.915	114.945	175.788
632	186.403	182.099	170.565	193.276	198.469	205.925	44.184	66.9701	75.3077	118.652	179.58	145.394	229.262	205.945	172.042	51.5935	52.4254	70.4241	155.715	174.198	144.595	132.376	136.921	95.5135	106.984	172.547	172.575	192.558	168.488	172.305	150.02	113.969	223.056	155.328	141.139	128.598	87.2716	119.873	225.183	204.626	173.541	95.9896	71.7001	68.1381	106.564	115.079	176.501
633	186.057	182.393	170.219	189.916	199.763	205.742	44.3179	67.9383	71.1204	114.143	179.742	146.602	229.965	203.356	173.262	48.9484	51.2387	76.7002	156.686	173.235	142.138	134.327	136.229	99.7376	102.348	169.008	170.711	193.982	168.505	172.031	150.175	113.834	222.548	152.48	142.046	128.887	83.4196	123.15	223.643	202.542	174.851	94.9084	70.3614	67.5353	107.631	113.468	176.979
634	187.41	183.592	168.601	185.925	201.239	203.281	41.0004	66.4327	70.3155	105.287	177.627	149.105	229.738	202.736	174.105	46.2327	49.6284	76.2132	156.371	172.326	140.78	135.272	137.151	99.8536	98.3427	165.21	168.672	191.356	172.04	172.89	147.551	115.325	221.995	151.779	142.748	128.332	80.2231	123.679	224.662	200.302	176.242	95.4878	69.2129	66.8459	106.531	112.95	176.35
635	187.363	183.132	168.998	179.795	203.899	200.628	38.8412	62.4005	71.339	100.894	178.207	149.866	229.053	201.079	175.417	43.9242	48.1942	76.7186	156.925	171.705	140.227	136.958	139.108	98.6763	98.0515	164.175	166.085	190.384	172.599	173.849	146.513	115.903	222.277	151.592	140.814	127.453	80.9089	128.075	226.502	200.656	174.727	95.9512	68.5133	66.0298	103.892	112.056	175.488
636	184.7	181.89	169.293	175.296	206.578	201.624	37.0354	58.1024	74.0288	96.0123	179.448	150.801	227.934	201.409	177.096	43.7332	45.3085	74.0218	156.697	169.008	139.964	134.399	140.154	92.4669	100.736	160.997	166.174	189.376	175.752	170.236	147.025	116.708	220.263	153.296	138.137	124.494	80.4621	131.819	225.631	198.738	181.532	94.4205	67.8531	65.3773	105.954	111.037	175.342
637	185.168	181.093	167.146	172.587	208.376	200.754	36.6544	56.3954	78.4244	98.4182	178.366	152.467	227.217	198.706	177.31	46.3921	43.8277	70.701	157.889	169.312	140.657	131.948	142.071	90.5585	108.982	161.337	166.266	189.398	175.085	167.647	147.388	118.74	221.543	152.688	138.382	121.121	82.0468	132.992	225.97	199.092	183.35	92.2926	68.3333	65.6698	111.617	107.374	175.385
638	184.901	180.041	163.496	166.822	210.563	198.503	40.558	52.5815	83.9526	96.7175	176.802	153.15	226.053	198.19	176.168	49.6245	42.9215	70.0711	158.874	167.734	140.262	131.302	138.29	86.1694	116.786	161.995	165.479	187.049	174.923	169.831	148.993	121.091	222.138	153.357	137.783	120.292	81.4057	136.57	225.054	198.736	185.206	93.0368	67.6679	67.4639	115.91	103.615	174.989
639	185.011	180.807	163.982	162.765	210.157	200.302	46.1896	49.7219	89.9593	95.3214	175.453	151.786	228.878	194.161	177.711	53.7348	43.5835	66.5899	159.206	170.491	141.596	131.225	135.376	84.9904	121.607	170.594	167.273	187.462	175.808	168.982	147.899	121.21	222.146	157.818	137.44	120.477	85.1692	137.116	222.837	198.245	187.594	94.1565	67.9947	67.6839	114.164	101.146	177.089
640	184.555	179.906	163.677	160.449	207.537	199.503	52.459	46.2557	91.8703	92.9026	176.45	154.842	229.254	192.456	178.316	53.4021	45.7825	63.2402	157.437	171.167	145.295	132.263	136.672	82.7398	122.783	176.484	169.938	188.549	175.767	172.2	147.476	120.62	221.6	160.344	137.94	122.451	86.1124	140.194	223.977	196.38	185.079	94.7023	67.0653	68.211	110.999	101.435	175.17
641	184.802	178.173	163.443	159.443	208.617	199.248	58.2041	49.1564	94.013	90.6775	176.736	153.498	230.148	189.761	181.147	55.3805	47.0916	56.9331	156.65	170.216	148.444	129.767	134.009	82.5683	123.88	177.209	172.458	192.111	171.204	171.284	150.431	117.432	220.717	161.655	136.763	125.895	86.2849	136.432	223.899	196.307	184.168	96.0837	65.6704	67.6079	111.618	100.893	177.232
642	185.173	178.113	161.135	158.857	208.232	197.514	67.3569	48.4237	97.5412	90.5674	178.371	156.755	229.448	188.222	181.945	54.3429	46.5639	54.6025	155.617	170.272	151.284	131.546	133.714	79.1302	128.245	173.614	172.041	192.879	175.743	169.379	150.952	118.974	220.304	161.32	135.887	126.976	83.7746	132.146	224.143	196.951	182.579	96.1211	65.6599	65.866	111.817	101.425	179.828
643	185.287	178.237	163.438	155.622	204.597	197.364	77.0699	52.5764	99.0953	88.5541	176.266	160.028	227.561	184.932	180.404	55.2473	46.0251	52.1754	153.208	171.655	150.78	128.634	136.22	74.5846	129.734	166.635	173.508	193.256	181.1	170.195	152.587	118.139	220.58	159.989	134.92	128.503	85.6971	132.315	226.043	197.905	182.6	94.9623	64.0923	66.9465	108.679	100.34	180.772
644	185.932	176.117	162.835	152.619	201.598	198.686	82.2148	51.2032	98.0045	93.4653	177.12	162.689	225.904	183.783	179.647	53.6363	44.4355	48.8112	150.047	169.875	148.854	127.148	139.28	73.6408	131.036	164.97	174.091	193.077	181.915	165.547	154.961	122.013	217.959	156.116	134.672	128.203	85.5316	130.768	223.779	198.312	180.884	94.401	63.6815	66.1272	107.435	101.757	181.62
645	185.961	178.345	161.072	148.563	201.948	197.009	81.9083	47.6455	95.2756	98.9172	177.343	161.091	225.786	184.105	182.614	50.7829	42.0202	50.3937	150.584	167.005	149.311	127.203	143.398	70.8999	127.109	161.308	177.556	191.386	178.685	164.126	153.7	120.939	216.701	155.792	137.526	129.086	83.2387	129.255	224.801	197.676	183.459	92.5251	63.3897	66.2068	106.658	103.01	180.357
646	185.423	178.105	162.449	147.976	201.639	196.442	84.0735	46.6657	89.5268	98.648	178.764	157.09	223.928	185.426	184.99	48.444	42.9126	52.54	153.757	166.217	148.703	126.931	141.329	67.4291	124.35	161.685	177.936	198.013	177.427	162.2	152.605	121.775	215.888	157.74	139.076	131.13	81.9058	125.325	223.094	195.615	181.48	91.0801	62.677	66.3024	105.793	106.303	177.609
647	186.853	177.71	162.966	147.484	202.048	198.045	82.7487	48.2364	85.0676	100.003	178.484	156.515	223.86	185.54	185.857	45.5655	46.5889	54.7811	152.918	163.508	147.083	132.971	137.161	68.1883	119.321	159.916	178.505	198.762	172.278	163.741	153.109	121.501	215.68	159.275	139.266	132.27	81.6122	123.148	223.637	197.009	181.171	89.9263	61.9295	66.5223	102.847	107.009	177.48
648	184.611	179.128	162.639	147.399	206.302	194.959	78.1269	47.5228	80.0481	98.407	179.202	153.488	225.48	184.356	185.205	41.7811	48.2096	55.2752	154.857	163.653	142.023	137.698	132.353	65.329	119.812	161.538	173.988	197.081	170.407	160.913	155.176	124.173	213.387	159.433	140.976	132.615	79.4928	119.825	224.589	195.621	179.832	90.3149	60.5856	67.462	99.6204	107.396	180.532
649	185.654	179.928	164.186	146.335	208.979	196.625	72.9426	48.8836	81.0287	97.463	182.085	151.274	224.195	184.024	184.467	40.3762	49.9376	54.3352	154.197	163.675	138.784	140.104	131.726	67.1097	122.304	165.456	170.49	194.253	167.746	161.564	150.982	120.002	211.222	161.239	139.863	133.471	79.0388	119.46	223.648	195.023	175.184	92.2578	61.3561	67.4593	95.2708	104.802	183.039
650	186.192	177.958	163.363	146.459	209.758	193.931	66.5154	48.4554	79.834	96.3935	180.346	148.299	225.196	183.702	184.113	39.1613	46.9644	50.5502	152.866	161.183	135.659	142.769	133.575	70.5983	125.341	174.146	165.959	197.445	166.702	162.16	153.073	120.669	211.128	159.56	140.796	131.309	76.4183	118.405	224.081	195.35	172.368	93.0309	61.3697	67.6944	92.9836	103.603	182.936
651	187.368	178.41	164.854	147.771	210.468	191.258	58.6144	47.9939	85.7509	96.3979	180.118	149.619	225.033	181.984	183.621	39.5511	45.3023	50.2141	151.552	160.707	135.118	145.003	132.815	74.8996	128.588	179.47	162.876	198.368	165.954	161.357	150.822	123.797	208.064	160.402	138.712	129.372	72.9656	119.028	222.593	195.922	170.986	93.4826	61.8671	67.6503	92.6523	101.211	185.926
652	186.97	176.735	164.677	148.197	211.606	186.838	55.5958	50.1798	94.0161	96.6542	178.146	149.144	225.266	178.634	182.929	38.6162	41.1778	50.8083	151.165	160.182	138.35	144.184	130.941	75.002	126.253	181.333	163.431	198.928	167.477	159.197	152.616	120.211	209.068	160.12	138.982	125.86	71.4595	119.925	222.969	193.631	174.181	93.6805	61.7493	67.3273	95.8724	100.386	184.831
653	186.946	177.746	165.027	149.226	213.989	185.425	54.1676	51.8932	99.8273	95.7371	176.646	147.376	224.502	177.591	183.164	39.7203	38.5037	54.6384	153.068	158.01	143.304	141.529	132.225	79.8299	121.015	182.705	160.952	200.532	170.503	161.717	153.441	117.188	207.644	162.059	138.991	123.967	69.2429	117.771	222.684	192.526	173.024	95.0947	60.679	68.0001	96.3183	99.1999	182.265
654	187.83	177.05	164.902	148.825	216.413	179.745	53.1281	52.6427	104.187	94.7298	176.429	151.113	222.188	176.06	182.625	42.1761	36.5495	55.0058	152.049	156.727	147.292	137.149	136.448	79.6828	115.051	184.87	157.384	202.863	171.31	165.036	154.957	116.27	208.857	163.395	137.903	124.926	68.7177	115.121	224.816	190.793	174.003	94.9732	59.3929	68.2472	96.0419	98.0089	182.211
655	188.772	176.008	165.042	146.53	217.312	179.543	50.8021	49.38	104.588	94.046	173.555	148.485	219.252	176.689	181.63	43.969	36.0398	56.3494	152.387	155.948	149.77	135.081	135.882	79.4698	111.481	185.304	153.607	205.53	171.208	164.631	155.013	117.167	209.882	163.123	134.931	131.366	69.061	115.697	224.418	189.263	171.667	95.3304	59.4987	68.3386	95.2569	96.9369	180.292
656	189.061	175.68	166.063	144.837	220.17	179.28	55.0903	45.2335	103.106	91.1928	169.81	147.723	220.388	175.409	182.116	44.908	35.3849	56.2355	149.702	157.197	152.718	128.767	136.675	85.3277	110.064	188.261	147.814	205.719	173.084	168.291	156.449	120.258	211.003	161.383	135.093	134.449	70.4397	116.229	224.13	191.337	171.559	95.4519	59.2801	68.1472	94.53	97.5133	178.99
657	187.728	176.358	166.626	145.997	217.55	181.33	57.323	47.2984	97.8063	91.9516	168.752	145.295	221.203	176.409	181.395	44.5494	35.6191	57.15	146.763	157.709	154.041	126.668	136.12	89.9295	112.222	187.53	147.059	207.378	175.561	169.495	152.307	121.102	211.023	160.814	136.116	133.232	70.5688	114.927	220.496	193.898	170.672	97.5205	60.4534	67.2562	95.9483	102.155	178.681
658	188.687	173.77	166.984	145.174	212.979	182.69	60.4939	46.6344	93.0097	89.9223	168.889	144.669	225.412	175.535	180.702	42.233	37.3134	57.5807	146.16	159.426	152.904	126.976	134.894	87.1909	116.214	186.535	145.613	209.034	175.411	169.152	152.618	121.394	211.52	160.25	136.574	132.239	68.1677	114.519	221.562	194.778	175.984	98.0216	60.4366	67.609	96.6495	107.722	179.856
659	187.194	173.839	166.513	141.834	211.277	183.523	59.2995	44.3075	90.1965	92.9105	168.731	149.344	226.846	176.854	182.591	39.4427	39.4192	54.2894	144.336	160.859	149.942	127.873	132.641	86.5888	117.136	184.471	145.96	212.129	178.72	165.698	155.327	122.863	211.375	158.98	139.558	132.564	71.8283	115.126	216.426	191.859	173.666	98.4467	59.9752	68.6176	97.8089	106.902	180.029
660	185.574	172.498	166.504	137.339	213.142	183.386	60.1975	42.1876	89.8769	92.8074	168.778	151.104	227.932	175.864	181.33	35.2196	48.2297	52.188	143.367	162.991	146.929	126.202	128.944	85.6159	116.257	180.702	146.261	212.316	179.006	166.855	154.03	121.844	210.704	155.785	140.888	133.595	74.1012	115.268	218.024	191.967	173.579	98.2522	60.2613	68.2746	103.32	107.028	176.452
661	185.764	172.527	165.486	132.68	215.324	182.47	63.2017	39.97	86.6718	95.337	169.845	154.392	227.441	176.804	180.499	34.0577	54.3875	48.2144	141.646	165.235	145.565	124.132	126.211	85.2653	113.342	174.343	144.628	212.473	180.319	164.574	158.562	126.131	209.44	154.131	141.104	134.121	76.66	114.292	218.442	191.9	174.664	99.7808	60.8743	69.2836	108.81	104.234	173.499
662	185.952	174.58	166.839	130.049	215.766	182.349	66.2695	38.4133	81.9012	99.1052	167.024	154.424	228.83	177.611	179.732	32.7277	60.6288	45.5907	141.475	169.846	147.378	123.285	125.824	81.6765	111.383	173.305	148.342	207.995	181.108	162.359	157.767	126.612	210.121	152.644	141.012	133.583	79.7256	115.207	216.949	191.082	174.237	101.533	61.7242	68.928	113.938	105.001	170.716
663	185.453	173.915	167.026	133.884	216.65	181.542	65.3303	43.9704	75.3764	104.946	170.383	155.317	228.408	179.472	179.375	33.8268	62.4015	44.9737	138.432	171.259	146.518	122.642	122.439	76.9547	105.971	173.065	150.507	208.283	181.249	163.597	156.081	127.156	205.156	152.747	141.839	132.291	80.6484	115.91	216.797	190.027	174.636	101.467	62.6039	68.0297	116.379	105.412	168.911
664	185.902	173.804	169.252	137.239	216.789	180.024	59.1544	46.501	71.1618	107.355	171.821	157.375	227.993	179.657	179.16	37.5652	59.7611	45.7851	138.464	172.447	146.526	120.216	121.469	71.2086	101.411	170.378	149.943	208.911	180.988	160.773	158.273	127.12	207.291	154.84	142.617	134.011	80.5589	111.609	215.245	189.366	174.582	103.308	62.2889	67.7333	118.202	108.053	172.565
665	184.73	172.706	168.688	138.456	217.213	179.779	60.0528	51.889	69.1056	108.371	176.139	159.99	229.174	178.48	177.514	38.8659	57.2893	48.0071	138.41	171.061	147.021	118.701	122.594	68.5272	94.1329	165.048	150.369	209.284	182.052	157.547	158.08	124.041	210.153	157.178	145.652	134.298	79.511	107.95	218.257	190.959	173.379	101.932	61.3728	67.0826	116.158	109.553	174.132
666	185.728	172.851	169.179	140.057	220.329	180.251	57.797	55.9738	69.6476	107.826	178.105	158.986	228.983	177.761	176.974	37.9802	52.8577	49.583	140.757	168.736	149.898	115.786	121.309	65.1081	91.6702	166.222	150.214	208.289	181.747	155.6	158.909	124.343	211.344	156.705	142.72	136.983	76.6705	104.038	218.087	190.808	173.583	101.504	61.5565	67.3156	115.306	110.665	175.369
667	184.873	171.615	169.198	139.048	221.609	181.311	61.347	61.2333	69.454	105.816	180.51	162.098	228.389	178.066	177.052	42.6863	48.8947	48.0638	142.776	169.069	152.931	112.995	120.727	67.6074	92.2747	169.604	153.764	207.448	183.167	155.009	159.798	123.202	211.837	159.518	139.521	137.152	74.6781	101.662	217.908	186.7	171.473	100.47	60.7686	68.4646	114.836	113.529	177.721
668	185.287	172.354	168.829	138.239	220.892	181.227	59.9048	63.7088	69.0662	103.617	181.145	165.856	226.8	176.87	176.327	45.7906	46.5884	47.6821	143.115	168.705	156.618	109.048	115.084	66.9298	97.8456	174.067	157.306	206.151	181.158	154.676	158.782	123.698	212.963	157.131	137.903	135.857	70.8536	102.134	220.639	187.686	172.434	100.174	60.9988	69.8188	111.229	115.524	177.155
669	183.859	172.181	169.398	138.691	221.03	180.598	59.1131	65.0918	70.3132	98.8199	179.118	171.08	226.666	176.93	176.843	45.6037	46.7425	48.9412	144.001	165.897	156.581	106.321	110.276	68.5431	105.044	178.904	162.178	206.261	181.415	153.75	155.682	122.548	211.084	157.835	136.856	141.507	72.6135	99.892	219.738	185.455	172.671	100.948	59.3921	70.9172	106.56	113.88	179.332
670	183.665	172.109	169.155	139.391	221.33	180.928	56.053	69.325	72.7745	95.1625	176.901	174.346	225.354	176.059	175.318	46.8977	46.9224	49.9166	144.108	163.029	154.54	105.9	109.4	64.2408	111.189	179.661	164.263	206.816	181.696	157.043	154.71	120.38	212.522	155.16	132.605	148.248	72.5334	99.0154	220.746	181.584	172.171	100.906	59.0325	71.8269	105.501	114.734	177.182
671	182.4	172.785	169.396	140.055	222.568	179.843	52.2364	72.4804	80.8975	93.1306	177.599	176.603	223.654	177.059	173.896	44.1352	45.443	49.8798	147.302	157.792	150.973	105.262	110.365	62.8448	114.078	178.05	166.749	206.76	180.361	155.125	155.679	122.407	211.405	155.833	132.053	150.708	73.7049	98.6193	221.198	182.664	171.953	103.205	58.5837	72.0092	107.448	112.541	176.207
672	181.868	172.265	169.186	143.041	220.55	179.082	53.197	73.42	88.8236	95.185	174.847	176.302	223.799	177.462	174.247	44.5032	43.8731	52.7694	150.159	155.661	149.673	102.173	111.117	65.8503	111.884	176.321	171.279	206.723	178.836	153.729	154.593	120.459	212.442	155.471	130.881	151.263	72.9389	99.4542	221.271	178.481	169.872	102.306	58.775	71.1798	108.431	110.571	175.59
673	180.499	170.989	169.242	146.384	218.992	179.291	58.3862	71.0909	92.4342	97.7454	170.844	176.513	224.432	179.519	175.997	41.5168	40.6778	52.1248	151.318	152.915	145.918	105.075	109.572	68.4706	112.091	173.544	173.936	208.673	177.373	154.843	152.043	122.674	210.902	157.787	131.467	153.855	76.808	95.9478	221.608	177.173	173.406	103.943	59.3763	71.288	108.943	109.34	174.965
674	181.934	172.301	167.752	149.617	216.99	178.775	62.6515	70.4536	93.462	100.507	169.531	177.463	223.878	180.424	174.824	37.9809	42.2185	50.3726	153.884	152.631	142.217	110.33	111.867	67.8552	106.776	171.736	176.519	209.159	178.13	158.637	152.523	122.737	214.192	156.304	132.943	156.091	81.4796	92.6198	222.297	178.405	172.806	103.741	60.02	71.8361	113.863	107.471	175.536
675	182.691	172.031	168.148	156.043	215.396	177.908	63.0755	72.1772	91.8416	106.948	168.717	173.081	225.294	183.335	173.891	35.776	43.1763	50.4286	152.615	150.01	134.026	111.175	115.906	67.2037	108.288	167.199	177.314	211.457	176.407	159.394	152.674	123.727	213.163	160.249	134.49	154.674	83.714	92.895	223.603	175.632	172.945	106.884	59.6446	72.2547	118.406	107.716	176.666
676	182.873	172.437	166.147	162.16	213.13	175.847	59.6002	70.8281	92.5752	109.919	169.549	169.761	225.9	181.755	175.207	35.7195	45.5446	49.1806	150.825	150.931	127.91	110.162	118.396	66.6187	109.462	164.906	173.998	211.745	178.153	154.538	151.401	125.635	213.505	158.086	132.714	151.439	88.2611	93.5886	222.968	171.251	172.191	106.374	59.8927	72.384	121.869	111.622	178.875
677	182.342	172.968	164.733	166.072	206.545	177.307	55.4074	65.6128	92.8926	111.594	169.455	167.684	227.983	181.544	175.702	34.6932	49.1844	46.2696	148.945	150.367	121.118	111.599	122.446	65.7707	111.052	162.317	173.068	213.551	179.469	157.406	152.114	127.808	212.479	156.299	132.457	147.279	93.8577	96.6347	222.215	171.65	175.99	105.968	59.4299	69.5875	125.621	114.145	181.188
678	181.225	173.414	166.323	167.531	206.572	175.87	49.4429	67.2506	92.9229	113.707	169.865	166.42	227.256	180.202	175.4	32.799	49.197	42.72	142.624	150.045	118.709	111.409	125.715	63.4919	111.654	160.443	168.212	212.724	178.285	158.709	151.795	129.284	210.566	157.804	133.68	145.812	97.0394	96.1149	223.479	168.981	172.065	106.201	59.4618	68.8756	127.206	113.051	183.338
679	182.534	173.818	166.619	173.717	207.433	177.184	44.9841	67.7886	92.3702	112.491	173.819	161.331	226.104	177.951	175.004	30.0298	47.9944	42.2425	141.118	150.381	119.51	115.467	132.183	61.9346	116.038	157.161	166.689	209.143	178.845	158.711	153.163	129.413	211.257	156.923	132.101	147.408	102.075	96.041	223.943	168.874	173.561	105.802	59.6601	68.1252	129.475	112.861	187.66
680	182.821	174.561	166.293	176.816	208.698	176.529	40.1843	65.7914	88.7452	109.651	175.444	164.055	226.151	178.393	172.588	28.2672	49.0565	40.8988	138.426	150.981	123.194	121.514	135.022	58.9685	122.514	156.791	164.341	206.441	183.473	154.589	153.177	129.344	211.851	157.161	131.815	147.389	105.555	96.5165	224.71	171.519	175.395	104.933	59.1399	65.4792	128.158	111.162	189.56
681	183.013	175.25	165.064	176.9	209.132	177.426	38.0391	61.4995	96.8967	108.831	178.182	162.295	226.37	178.237	173.153	25.72	49.9352	42.1779	139.907	152.596	124.489	125.673	137.647	58.6929	126.252	160.542	163.09	204.292	181.932	159.665	155.275	128.598	209.085	155.748	129.706	147.489	105.526	95.9205	225.222	174.935	176.333	105.049	58.2703	67.7456	125.848	111.037	188.795
682	184.072	174.299	167.097	178.315	208.045	177.86	35.3217	59.6684	97.6731	107.181	181.507	166.143	225.37	177.085	173.213	25.3338	48.9916	42.8797	137.584	153.532	124.803	128.499	141.727	60.5235	132.245	164.726	160.635	203.873	182.706	158.55	153.76	129.192	206.559	156.659	126.435	145.234	103.526	97.6373	225.853	172.082	177.129	103.879	57.6181	66.624	121.871	108.489	186.275
683	184.398	173.834	166.625	175.655	209.054	175.846	31.706	58.2945	91.2564	104.915	182.96	167.247	225.135	177.709	169.528	27.173	47.4283	44.8972	139.685	150.701	128.756	128.537	146.791	64.5009	132.063	168.669	158.429	199.446	185.839	159.698	154.157	130.14	204.011	155.547	126.787	139.983	96.7778	95.3701	223.629	171.291	175.396	101.921	56.6448	65.3023	120.992	106.394	182.698
684	185.038	175.31	166.225	172.194	209.643	175.827	29.7019	53.8968	88.1934	97.8256	184.829	167.618	226.829	177.86	168.929	29.0904	47.4403	46.6152	143.508	150.605	131.321	127.402	149.681	65.5686	128.991	170.065	158.029	200.822	188.947	157.97	154.152	128.907	205.288	155.305	125.612	138.447	96.0868	94.0559	224.087	169.427	176.967	101.222	56.008	64.0417	121.844	105.583	181.895
685	185.043	175.42	165.396	173.277	208.764	178.653	29.0712	52.9566	80.3983	92.602	185.786	169.171	226.904	175.956	167.785	30.7916	49.7179	49.2346	144.776	150.928	132.582	130.643	146.102	70.015	126.22	169.981	155.912	199.227	189.682	155.85	155.628	126.978	204.898	156.941	126.733	137.423	97.4821	94.885	225.492	168.006	177.002	100.65	55.8153	64.0022	123.873	101.666	181.305
686	183.36	174.651	164.542	173.168	210.019	180.18	32.9569	48.5958	74.4307	87.4501	187.661	167.543	225.497	176.851	167.238	30.0524	48.918	48.0296	149.326	150.256	135.519	133.298	142.306	74.1912	119.284	164.335	156.44	199.602	189.425	156.923	158.899	127.944	204.031	156.747	128.613	138.104	104.316	91.2121	224.831	167.54	176.582	100.546	56.3524	64.2269	123.393	100.389	180.779
687	182.631	174.121	164.606	171.66	207.405	182.642	34.8934	48.9276	73.1922	85.4584	187.644	166.53	228.106	176.385	167.491	27.1941	45.9981	46.7194	150.427	150.187	136.106	132.788	135.916	75.3327	114.439	162.994	160.385	201.35	190.733	153.275	160.048	129.405	202.525	156.091	131.479	135.209	107.79	88.074	226.082	167.238	177.963	102.268	55.1278	63.4559	123.102	100.341	181.065
688	183.126	173.475	163.111	166.825	206.366	182.522	36.7953	49.2486	75.2628	83.1842	191.486	166.171	228.69	173.578	165.734	27.2834	43.0831	43.3725	150.142	150.026	140.357	130.93	130.868	77.717	109.357	162.859	164.765	197.699	188.31	158.272	162.559	129.204	203.019	155.357	131.626	133.288	107.952	85.8845	225.613	168.525	179.563	103.642	55.5047	63.526	124.214	102.018	181.881
689	180.924	174.674	164.033	162.011	207.852	185.465	39.0476	49.889	78.0373	81.8929	189.836	164.179	229.023	173.432	163.93	24.59	41.9177	41.5934	150.422	154.774	142.226	127.671	128.093	81.5087	108.093	163.86	169.79	200.438	191.092	161.002	163.699	128.852	203.861	154.546	130.87	131.6	107.182	83.2635	226.029	170.169	179.224	103.859	55.1758	63.8883	123.29	106.313	180.183
690	181.654	175.636	163.309	157.864	207.702	184.409	41.1989	51.806	75.5609	81.8519	185.511	161.1	230.847	173.149	164.361	26.7701	41.6207	39.3381	150.515	157.88	143.174	130.281	125.126	81.4011	105.514	162.753	175.608	199.569	190.597	161.558	162.822	126.405	202.135	154.479	133.294	129.216	105.716	81.2614	229.029	172.691	177.604	103.835	54.937	64.0477	122.27	107.769	178.965
691	181.551	175.805	164.507	153.013	207.489	184.125	40.5415	54.8513	71.8983	81.6492	183.053	159.264	232.449	173.57	165.678	29.0934	39.2907	38.1604	151.604	160.689	142.054	132.764	124.45	77.5386	106.336	160.713	179.747	201.586	191.481	161.107	162.953	127.373	202.915	154.741	132.307	126.584	100.481	81.6996	226.178	173.033	177.328	103.361	55.6679	62.6311	120.584	107.772	176.952
692	182.267	175.549	164.97	151.186	208.629	179.394	41.5757	59.3708	67.2824	81.8905	178.981	162.091	231.44	174.94	165.514	31.6015	39.1783	36.417	150.975	163.232	144.662	137.093	127.252	76.3013	111.922	157.864	181.487	201.924	189.398	165.613	163.384	125.764	203.892	154.897	131.574	126.514	102.574	83.5569	226.988	172.461	177.964	103.324	55.2333	60.5472	114.264	107.525	174.181
693	183.794	175.789	165.206	153.694	208.646	176.587	44.669	62.9634	63.9239	84.7279	180.87	166.479	232.672	176.336	165.394	33.1614	37.38	36.5782	151.587	164.929	144.633	138.292	130.884	71.5621	121.1	151.712	181.574	198.476	192.55	166.671	164.076	129.861	202.31	156.676	127.323	127.532	101.523	85.3952	227.148	172.84	176.152	101.651	54.1884	60.1119	111.36	107.593	171.929
694	183.263	174.842	166.429	156.388	209.611	178.831	45.2921	64.2402	63.5519	86.5593	180.629	169.637	231.759	174.429	167.455	36.2821	39.194	37.0138	152.923	168.229	141.052	133.732	129.123	68.6351	129.057	152.469	177.247	199.564	195.802	167.251	162.076	130.059	199.579	154.421	128.071	125.878	99.6756	88.6632	226.491	174.377	175.239	99.9518	54.1197	58.6601	108.874	108.088	169.323
695	183.846	174.974	167.864	155.499	208.878	178.431	45.6231	67.8647	59.0417	86.5288	178.326	171.04	232.183	173.985	167.942	41.1531	39.5589	39.634	153.663	169.8	138.032	131.128	126.933	68.9276	134.68	150.504	171.33	197.825	197.172	164.197	161.816	131.746	199.971	154.627	129.63	125.388	96.8275	94.0361	224.935	174.147	172.109	98.2769	55.8561	57.8411	111.925	106.692	166.467
696	184.425	175.917	168	153.625	208.958	179.184	45.2066	69.7304	58.8584	87.8792	176.187	171.376	232.944	172.688	169	48.2015	39.2689	42.1599	152.256	168.816	135.52	128.544	127.131	67.7687	139.249	149.102	165.309	196.864	197.993	162.029	162.342	133.908	201.109	152.48	129.68	125.49	93.676	95.021	225.606	176.85	173.682	96.2154	56.3627	57.0734	109.633	103.905	165.821
697	183.713	174.876	168.632	150.272	208.629	178.523	43.6164	72.8168	56.9395	83.5994	174.521	173.167	232.442	172.883	169.215	53.9366	38.5981	43.9166	151.136	168.287	136.351	129.258	126.419	68.9468	138.579	151.901	161.059	197.262	200.557	163.997	161.935	132.805	201.789	152.782	127.995	127.745	91.5182	94.895	224.679	176.17	173.512	95.5164	57.1102	57.6868	109.724	102.641	167.014
698	184.068	174.121	169.588	147.143	207.669	179.888	42.7774	72.5517	63.0443	87.5714	172.242	175.828	232.048	173.101	168.892	57.4417	36.7922	43.9819	150.377	165.753	138.493	127.464	127.511	68.5189	134.089	153.498	161.823	197.86	201.593	164.816	162.053	136.048	200.433	155.283	128.433	127.62	92.2877	92.7589	224.937	173.924	178.27	93.1457	57.8994	58.0572	111.469	102.555	169.367
699	183.601	172.932	169.274	144.144	207.964	180.981	39.9687	75.1171	69.1955	89.6237	168.617	176.156	230.143	170.35	169.912	55.2508	36.6113	44.3164	152.933	163.374	139.895	125.121	126.826	66.0094	132.761	155.369	161.882	196.482	200.987	165.078	164.411	135.37	201.059	154.604	126.571	129.283	90.572	90.7291	226.242	175.073	177.11	93.0034	58.9986	57.3911	109.362	102.191	172.888
700	182.724	173.323	170.434	145.396	205.625	177.231	38.9289	82.3868	66.8881	94.7974	165.239	174.663	230.282	170.621	169.308	51.2713	35.1472	44.6586	154.304	162.01	140.793	123.048	127.488	63.4498	129.093	154.38	161.651	198.057	201.535	164.374	161.487	135.737	202.093	153.839	128.021	130.791	87.894	88.0864	225.903	174.899	179.145	92.1001	59.4408	58.1438	114.068	99.1724	174.211
701	184	171.812	170.651	149.786	206.809	177.169	36.3317	88.4939	66.3419	100.909	163.407	169.537	230.431	171.956	166.194	48.1251	34.9731	44.3749	155.818	162.93	137.817	121.724	127.37	69.5766	127.562	157.539	159.215	198.219	199.105	164.207	160.97	138.192	202.821	153.295	127.056	134.76	89.4275	86.538	226.419	173.023	181.906	92.1314	61.4346	57.7778	113.141	101.005	174.496
702	184.801	173.984	169.453	150.49	207.988	175.846	36.9169	90.5151	63.6375	107.258	161.682	168.204	229.024	172.365	166.082	45.5292	35.0566	45.6132	154.918	165.204	134.911	123.72	128.789	70.9874	128.525	161.038	164.614	194.973	199.28	165.909	162.744	137.308	199.601	154.189	127.268	136.724	91.5009	88.5533	229.4	173.486	181.201	92.4365	59.4989	59.2791	113.105	100.67	172.061
703	184.073	174.26	171.476	149.466	211.012	175.254	37.3146	92.2802	56.9475	111.512	160.162	166.233	228.364	169.924	164.441	41.9816	36.1902	48.0842	153.537	169.226	131.058	125.667	126.17	67.3646	130.878	158.636	172.935	193.407	195.921	163.928	161.37	135.009	199.79	151.01	127.217	137.688	90.1434	90.8914	228.193	177.953	182.414	90.4238	59.2727	58.4959	112.658	101.938	169.567
704	182.281	174.463	171.897	148.236	212.477	171.601	35.9558	91.7693	53.2223	109.907	158.055	161.683	228.498	172.842	163.998	39.1266	39.4696	47.539	154.78	168.767	130.619	128.796	122.383	64.0224	128.482	156.075	178.921	193.564	195.563	159.949	157.727	134.463	201.241	151.79	127.484	139.782	90.5716	91.1336	228.407	177.356	179.466	90.3257	59.3065	58.0016	112.034	103.394	169.612
705	183.675	174.159	170.944	145.289	212.613	172.269	33.646	95.7402	52.5851	110.163	158.98	161.412	227.894	171.737	163.635	38.4729	45.9411	48.8873	155.542	167.036	127.342	131.306	117.283	63.3164	130.758	154.938	185.621	191.628	192.677	159.374	160.064	132.478	201.515	150.329	126.933	137.051	88.9072	93.5923	230.176	178.41	176.005	88.8877	58.592	57.4066	112.778	104.036	168.285
706	184.322	173.511	169.64	137.272	213.597	174.264	33.8375	93.6297	50.1675	106.569	162.557	160.145	227.12	170.966	164.491	36.0747	50.4483	47.7045	157.494	161.976	126.897	131.737	115.331	61.1486	133.131	153.598	190.698	191.41	191.844	162.422	156.501	134.31	202.408	149.851	130.476	133.563	85.3984	94.808	225.025	178.158	180.816	89.3406	57.9127	58.1848	115.075	105.4	171.433
707	181.986	172.631	169.402	132.964	212.07	172.41	30.4088	90.5152	49.1387	100.297	165.855	158.755	227.564	171.062	164.83	40.1014	55.2018	48.0984	156.283	158.81	123.136	130.485	115.92	61.9166	133.212	152.52	192.421	189.287	192.27	158.035	158.192	135.183	200.831	151.376	132.425	126.546	82.6948	97.2163	224.716	179.323	179.412	89.4191	57.0057	58.4036	115.899	108.145	175.909
708	183.119	172.672	169.47	125.872	209.682	171.011	30.9565	87.6677	45.2221	95.7378	163.745	159.399	224.908	171.787	161.947	42.6912	57.4289	45.9092	152.425	157.736	117.771	130.45	118.668	60.726	131.361	151.609	192.896	190.543	191.09	158.768	162.994	134.827	200.594	149.337	133.191	122.727	78.4376	102.82	228.251	179.803	179.604	88.9299	58.1477	58.7039	117.905	105.737	178.558
709	182.994	171.726	171.464	122.043	208.383	168.75	30.7617	81.75	44.017	90.9262	160.687	161.207	223.247	171.873	161.141	48.5118	56.9336	42.4228	150.213	158.07	115.559	127.764	117.098	59.5962	127.62	151.271	191.979	192.486	189.952	159.924	159.945	133.517	199.838	148.256	133.603	122.107	77.5161	104.492	228.188	177.571	178.422	88.5225	58.5582	57.8481	119.142	109.226	178.816
710	182.86	170.995	171.353	115.297	206.756	167.724	30.2317	80.8923	44.7811	89.7518	156.237	161.288	224.571	171.042	162.14	52.5124	58.0315	39.9081	147.195	155.876	113.032	122.539	122.126	58.3457	123.5	148.719	188.77	194.065	188.083	159.19	160.838	130.887	198.884	148.206	132.433	122.413	74.9818	110.604	227.011	173.921	176.763	87.8477	59.7813	56.9097	119.965	109.749	179.299
711	182.818	171.242	173.059	110.902	207.274	168.812	32.2641	76.4063	47.1269	89.3684	156.629	160.408	222.522	171.522	161.295	55.5351	55.6739	40.5431	147.428	153.246	114.047	124.049	124.928	59.8782	124.503	145.371	186.347	194.325	186.487	159.935	158.926	130.464	198.421	148.152	131.461	121.985	71.6736	112.735	226.296	175.099	176.109	86.614	60.7221	57.5469	119.764	106.686	179.411
712	182.724	169.952	172.093	107.713	207.536	164.613	33.2924	73.56	47.9288	89.5184	159.49	161.688	221.761	173.985	161.667	55.3026	50.7043	41.6991	146.499	151.735	116.774	126.534	128.519	62.4218	123.061	145.998	182.628	194.941	186.46	157.168	160.74	134.229	198.414	146.124	131.317	122.066	69.7068	111.318	224.544	171.224	174.739	87.8136	61.373	58.5976	120.265	104.117	175.994
713	182.488	170.233	172.427	110.286	209.294	165.299	33.9922	71.7404	50.6835	89.313	161.171	160.421	222.777	175.819	160.47	52.6867	48.1519	46.143	145.369	152.035	117.73	124.307	129.254	67.2073	123.901	146.366	179.92	194.119	187.815	156.498	159.286	134.374	199.619	144.311	129.021	125.533	68.2836	108.506	224.84	174.521	177.685	87.345	60.3819	56.2544	122.131	101.141	178.579
714	182.947	169.463	173.322	116.155	210.465	162.772	33.9007	71.2867	52.7598	90.3732	164.866	158.202	222.43	175.081	162.712	49.2944	44.6154	47.855	145.419	148.594	115.779	122.709	127.148	71.6272	128.745	149.409	176.257	196.052	186.737	156.114	157.969	133.24	200.028	147.348	128.292	124.473	67.5476	108.328	223.378	171.78	174.301	87.7063	60.0577	57.1774	124.218	99.5471	181.796
715	182.791	168.257	172.055	124.662	212.045	161.5	32.0708	72.1359	55.4048	91.5541	168.991	158.256	221.25	176.429	163.732	45.9879	41.786	52.1764	143.258	147.766	115.023	125.785	125.129	74.6464	134.489	153.666	175.256	195.214	184.797	155.434	156.034	134.029	199.698	145.017	125.419	125.665	68.519	104.292	222.671	172.981	172.286	89.6542	59.6123	57.0132	123.685	98.6233	186.862
716	184.266	168.404	171.26	133.98	211.834	159.869	30.0427	69.0078	57.8256	92.911	173.457	161.007	220.722	176.088	165.63	43.291	41.3692	56.5966	139.31	145.217	117.313	127.905	125.73	79.7169	135.61	156.925	173.829	194.763	185.822	155.1	158.732	130.491	201.43	144.053	126.483	125.044	71.9937	101.068	222.221	172.787	173.642	89.9516	59.871	56.5724	118.363	97.4823	188.872
717	182.634	168.855	170.913	142.701	214.273	157.028	28.4354	70.0883	59.3823	94.0931	176.936	162.993	221.296	175.339	162.846	40.4859	44.5567	58.9224	134.439	143.393	119.912	126.277	125.71	83.785	134.642	160.111	169.91	196.567	183.855	157.068	155.22	129	201.589	142.428	125.27	124.217	70.9025	96.008	221.251	171.69	172.266	92.9748	59.3185	57.1487	114.455	97.8246	191.048
718	182.877	164.163	171.54	150.79	214.651	156.792	30.0136	73.3245	62.5848	91.3755	181.108	167.358	219.429	174.771	161.744	42.5012	44.9542	60.624	130.909	143.547	123.514	122.179	122.788	90.3318	133.214	166.658	165.553	196.937	181.626	160.831	156.055	130.106	203.742	141.432	126.991	123.478	72.0613	92.2158	220.225	170.746	170.811	92.8781	58.1718	54.566	116.598	98.8406	191.084
719	181.369	165.109	169.701	155.98	215.477	156.172	30.689	77.381	68.4504	87.7159	181.556	169.51	218.926	173.645	161.327	44.8248	45.3072	61.2893	129.601	143.46	128.764	118.965	122.7	97.042	132.689	168.969	162.104	194.582	179.467	160.467	157.953	131.203	202.5	137.605	125.135	120.415	69.9833	91.6197	222.655	172.562	174.914	92.7553	57.1519	53.737	118.019	95.9765	189.566
720	180.647	166.215	168.668	158.759	215.192	158.962	34.6934	82.1031	70.2374	86.4491	181.118	172.023	222.169	175.289	161.549	47.4747	45.1156	61.3993	129.042	140.616	131.812	118.741	121.104	102.213	131.337	173.068	158.116	199.12	180.145	163.205	159.028	132.486	200.965	137.355	124.04	116.825	71.6498	91.7305	220.755	172.996	174.973	92.8056	55.4821	53.9821	120.416	91.7453	188.452
721	181.062	167.321	169.856	156.679	212.6	159.224	34.5802	89.815	67.2475	79.7539	178.993	177.444	221.175	178.425	160.568	46.4043	42.2075	63.8145	129.981	140.386	134.974	119.082	118.519	107.856	134.867	179.71	155.128	195.792	182.285	161.587	158.387	131.181	200.685	137.817	126.175	116.117	72.4165	90.2827	221.504	171.424	172.145	92.8816	55.9279	54.1845	122.645	90.7519	185
722	180.527	166.329	168.921	156.344	211.788	159.236	35.4808	91.4062	63.2938	75.9538	177.134	176.77	222.297	179.123	159.645	44.631	41.5006	67.025	132.284	140.075	141.205	118.774	123.302	113.602	141.28	184.551	154.726	196.623	181.775	164.29	161.27	131.599	199.862	137.016	127.729	115.241	78.1134	85.7583	220.162	171.155	174.252	93.1058	55.2761	53.0477	123.634	92.179	183.292
723	181.017	165.432	168.778	157.578	212.974	159.208	34.5798	92.8308	59.2307	74.6979	175.85	179.824	221.959	178.899	159.517	42.3927	38.6663	73.0005	133.314	144.015	144.451	118.365	127.523	115.818	146.172	188.358	149.837	195.25	183.125	162.856	157.737	129.846	196.663	136.879	133.02	116.541	82.5831	84.3213	216.852	176.737	172.157	93.5219	54.2465	53.6979	126.718	93.2812	182.456
724	180.92	164.93	167.695	153.769	212.344	159.773	34.1274	92.0411	54.7794	72.8877	178.502	179.05	222.201	178.073	158.835	39.7528	38.1164	75.8302	135.193	148.396	145.859	119.851	131.842	120.009	149.328	191.657	150.373	193.912	183.269	161.881	157.917	128.616	197.895	139.151	136.54	115.929	78.4564	85.9994	217.311	178.25	173.202	94.0055	53.5083	53.1789	126.994	95.0915	184.041
725	180.385	166.585	167.052	149.291	211.94	159.713	31.2847	90.2751	53.9945	71.2328	181.208	179.834	222.565	178.503	157.01	38.7309	35.0765	73.1012	135.233	152.878	147	119.668	132.36	124.38	151.037	191.224	151.173	192.869	185.554	160.506	156.49	129.874	196.565	143.308	138.152	114.913	76.5243	84.4771	217.114	177.839	171.837	93.8403	52.851	54.2466	128.677	92.1768	187.012
726	182.49	167.077	168.17	144.051	213.681	160.847	30.0921	88.9503	52.98	68.3931	178.718	181.217	221.19	180.08	159.817	38.7359	33.4137	69.1404	137.673	157.842	150.094	123.508	132.024	125.079	150.838	188.296	154.374	193.393	187.642	158.146	156.498	131.405	196.851	144.805	138.99	115.107	75.4825	83.1192	219.28	179.125	174.05	96.5035	52.6219	53.7343	128.717	90.1963	190.593
727	181.705	166.78	167.731	138.78	214.326	161.143	29.9189	88.9709	51.5486	68.1186	177.65	182.113	219.991	178.957	158.129	39.8021	31.6434	65.2484	134.617	162.01	152.647	127.966	133.105	124.526	143.148	180.986	156.017	193.396	187.467	157.827	153.141	134.328	197.419	144.031	139.946	115.276	77.2043	81.9153	218.797	175.231	174.012	96.4046	52.7342	52.5753	124.106	91.4509	189.138
728	181.612	168.474	165.946	134.191	212.759	160.637	27.2508	89.4663	50.4965	65.4868	177.045	179.584	220.03	179.295	156.56	37.841	31.9199	59.7875	131.611	164.776	156.347	126.484	132.389	123.667	138.28	174.185	157.496	193.344	187.008	157.215	152.368	134.187	198.87	143.79	144.181	117.546	76.6671	82.2891	216.387	179.527	173.356	96.534	54.1474	52.8974	119.976	92.4666	191.592
729	180.766	167.588	167.699	132.882	210.105	160.639	29.3082	93.7958	45.8574	62.4543	176.691	179.105	217.633	180.37	156.411	35.7884	32.5223	55.2361	130.632	165.439	154.356	123.702	131.544	115.366	137.737	166.913	158.66	196.581	185.953	159.022	151.766	133.611	200.687	145.796	143.644	118.501	78.6476	82.4204	219.724	184.236	171.771	96.8139	54.3344	52.8402	119.73	94.0395	190.352
730	180.506	166.471	166.356	134.756	207.864	157.04	34.1624	97.2636	41.9456	60.5829	176.53	178.513	217.664	178.718	158.337	33.6762	34.122	51.5304	131.916	167.63	151.705	128.846	131.208	109.543	142.536	163.24	163.652	197.387	184.531	158.329	149.577	133.575	201.109	147.045	142.693	116.604	75.48	87.1418	220.248	188.062	169.451	97.2663	54.0389	51.6013	118.447	93.7381	191.523
731	180.715	166.803	166.02	138.03	204.523	154.906	35.3498	101.879	41.679	62.9927	177.388	179.875	218.343	178.839	157.979	30.052	35.4436	47.523	134.635	166.553	154.95	133.584	127.419	103.277	144.968	164.317	168.219	201.319	183.704	163.038	150.53	137.277	198.756	144.574	141.777	115.204	75.8925	92.2357	219.869	188.305	167.505	98.1973	52.7892	51.3029	119.901	95.3372	188.948
732	181.168	166.33	165.975	140.142	202.605	154.497	33.6753	104.701	41.1103	61.8249	179.956	178.725	218.077	176.869	158.263	29.1899	33.998	46.2874	140.865	163.537	155.052	137.799	131.523	101.375	147.263	165.41	175.891	202.449	183.971	161.738	153.27	134.291	197.809	145.546	138.902	115.046	76.2823	92.5395	221.61	192.426	163.528	97.82	51.0035	50.226	119.416	94.4012	188.224
733	180.993	166.977	165.455	144.398	200.104	154.607	35.6923	107.049	40.8622	63.0502	179.882	179.061	218.256	177.62	156.709	28.3419	34.5422	46.6453	145.516	160.422	158.012	140.765	134.272	100.626	149.985	169.579	178.57	206.063	183.148	158.573	152.795	135.074	198.888	147.112	137.721	113.175	77.3462	90.9608	220.565	195.978	165.172	98.9843	51.5655	49.6654	117.035	90.6778	188.972
734	180.172	165.468	167.121	149.802	201.244	156.755	36.1862	106.083	39.7973	66.1212	178.011	179.331	217.947	177.879	156.171	30.2698	33.4498	48.2055	151.137	159.77	160.885	141.554	132.562	99.4678	151.292	173.732	178.021	207.694	184.437	161.885	147.341	134.845	198.866	144.813	135.65	112.258	81.6249	91.829	221.758	195.693	164.795	98.7141	51.9411	49.7894	119.35	88.8666	192.596
735	179.515	165.944	166.9	150.384	200.617	158.997	32.2749	105.431	38.1963	66.3099	178.51	179.474	217.093	177.481	156.366	30.6246	33.5573	50.2531	151.687	159.114	164.191	136.107	130.509	100.565	152.327	175.997	175.567	208.104	185.219	163.804	149.261	133.24	197.893	144.955	130.741	111.973	82.6658	90.5104	222.743	197.044	165.539	100.378	50.79	49.4016	122.145	91.3759	194.912
736	179.585	163.711	167.133	150.132	198.438	160.614	30.0951	105.104	38.696	67.9254	172.322	179.836	216.614	178.268	158.299	31.684	34.9215	51.9903	151.645	162.532	167.741	134.313	131.789	101.105	152.071	179.047	176.958	207.386	183.842	163.627	147.886	131.069	196.885	141.462	128.252	108.128	81.7584	90.1692	224.137	198.03	168.588	99.7883	51.3955	49.6711	123.71	94.4913	194.707
737	177.206	166.637	166.979	147.601	196.915	161.968	28.7144	98.2357	40.1694	67.976	167.666	182.251	215.929	179.573	158.688	32.0797	34.6342	56.4452	150.644	162.985	168.939	131.247	133.414	99.1245	148.498	180.74	174.609	207.041	185.394	167.968	148.753	132.223	196.108	143.917	123.083	105.395	81.6651	90.2959	222.362	195.944	162.958	101.55	50.4699	48.8604	121.349	96.2123	195.753
738	178.994	167.382	165.147	146.871	196.429	164.337	30.987	93.2595	39.1016	67.9777	164.156	181.949	217.884	179.678	161.057	31.541	35.5652	63.3083	149.638	162.302	164.849	123.686	140.807	99.3721	143.749	178.844	171.542	211.302	187.543	165.723	150.677	130.378	196.919	143.865	122.843	102.646	76.2082	90.9364	222.234	196.589	168.494	102.217	51.795	47.0205	121.157	95.9709	194.487
739	177.98	166.804	165.735	147.194	197.354	167.231	32.8466	89.2593	35.6036	64.2413	161.119	180.473	218.393	181.171	161.869	27.9854	32.8015	67.1779	152.483	160.895	165.037	122.38	144.064	102.732	139.561	174.805	168.712	211.118	188.146	165.036	155.721	128.234	197.68	144.197	122.994	102.777	73.9382	90.524	220.732	200.252	165.599	102.176	50.8197	46.7379	121.58	94.1312	194.484
740	178.28	165.126	163.431	144.428	198.121	167.422	37.9017	86.6068	33.7321	61.219	159.585	181.957	217.148	180.268	162.782	26.5754	31.1165	68.1428	154.188	159.49	162.988	125.241	145.132	104.115	138.237	169.308	164.33	207.969	187.574	162.531	156.534	128.541	194.644	144.638	122.373	102.684	72.6544	90.9806	220.696	200.334	166.976	101.805	49.7433	47.1006	118.487	94.6097	197.321
741	178.569	165.169	165.234	143.279	196.999	167.022	43.871	82.9151	34.6565	61.0821	158.454	182.312	215.326	179.817	164.053	25.2633	30.9639	67.5807	155.683	159.354	161.718	125.539	147.01	107.206	135.645	166.962	166.869	209.169	185.961	162.328	155.53	130.785	195.173	144.385	122.341	103.084	71.1104	91.3247	222.165	199.634	168.609	99.4058	47.9806	47.1705	117.092	95.2737	198.284
742	177.348	162.227	165.161	145.374	196.397	166.522	45.7986	79.8168	37.6923	60.4727	158.608	181.283	215.246	179.938	164.19	24.5841	30.4227	64.7453	155.581	160.363	160.957	126.46	148.077	108.763	133.402	162.636	167.185	208.233	185.662	161.617	158.039	129.161	194.944	140.701	120.958	105.155	70.2524	91.889	221.556	197.624	169.859	98.7995	47.9962	46.8062	118.577	97.7873	197.897
743	177.852	161.438	163.27	142.448	195.542	165.947	46.3327	78.1505	40.0873	60.1831	160.493	178.062	216.96	182.329	164.15	22.4079	31.8643	61.0898	151.97	164.9	160.401	125.371	142.78	108.277	132.484	166.444	170.364	206.131	184.023	159.515	160.261	127.5	192.848	145.011	120.508	107.001	67.1497	92.5565	221.497	198.574	174.329	99.7509	47.49	45.8351	117.171	96.4966	200.498
744	177.213	160.574	163.11	138.31	195.316	167.381	45.2218	73.6611	40.9757	63.7763	161.366	173.769	218.202	183.706	162.062	21.6457	32.8031	57.1625	149.214	168.342	162.586	127.645	138.092	105.228	131.628	168.833	171.244	205.526	182.975	164.815	161.237	127.018	193.077	144.183	119.428	108.868	66.7894	92.7169	222.205	198.887	175.353	99.3673	46.7711	46.048	114.563	97.1123	198.834
745	175.285	160.319	162.801	133.446	193.658	170.392	41.4107	72.7607	43.1633	66.8294	163.024	170.692	217.66	183.884	162.819	20.9871	36.7364	53.7425	147.43	171.303	162.053	125.69	136.714	105.853	128.749	172.983	171.395	202.575	178.86	163.481	162.474	128.387	192.497	143.7	118.191	109.505	66.851	91.1902	225.048	201.281	173.792	97.6142	47.7541	45.3075	110.09	94.848	200.236
746	175.006	159.692	163.332	129.163	193.839	171.329	41.7825	72.4854	42.9679	66.5457	163.32	165.873	218.966	185.786	161.138	22.761	45.6728	49.4821	148.486	170.217	160.975	125.6	136.862	104.253	128.43	176.488	170.759	203.524	178.478	162.512	162.461	125.151	189.012	141.549	115.914	103.34	66.8334	91.906	218.696	201.735	170.49	97.3961	49.1229	45.5401	107.638	95.1311	201.23
747	175.157	159.857	164.629	124.799	193.323	167.599	42.2307	75.1786	43.3401	64.82	163.177	160.509	219.937	186.044	161.617	28.0069	53.0292	49.0337	150.407	169.749	157.367	123.07	140.088	103.295	125.556	180.496	168.941	206.207	178.029	165.214	163.353	124.869	186.691	141.63	116.235	102.745	66.5999	93.3827	222.533	203.702	172.716	95.1949	50.6417	46.8369	110.758	95.8639	200.817
748	175.776	157.826	165.357	120.733	191.71	168.078	42.3975	76.8299	44.0325	59.6858	163.182	156.432	220.666	184.301	160.763	33.3477	55.6765	48.2051	148.969	167.746	151.892	122.673	140.483	99.3866	123.779	182.218	171.311	206.428	179.801	165.497	165.511	127.457	187.686	139.602	116.026	102.3	67.7855	94.1779	223.975	202.656	171.783	96.4156	50.7137	46.9607	113.755	98.9196	198.53
749	176.714	158.859	164.475	116.544	189.601	166.168	41.7526	82.5002	48.8057	58.5404	162.348	156.509	220.331	184.433	162.022	35.454	56.1199	46.7289	151.913	165.916	146.058	126.573	140.952	94.3966	121.868	182.959	175.447	205.012	182.703	164.656	163.037	129.618	188.268	141.305	114.963	101.776	64.2614	95.8247	224.108	204.229	174.643	97.0632	49.841	48.127	117.653	101.021	196.093
750	178.232	159.519	165.609	113.881	190.043	163.517	43.6342	85.0558	49.9801	58.4239	164.403	157.624	219.741	185.611	162.901	36.3308	56.0592	44.6505	151.658	164.164	139.618	131.964	139.885	90.3866	123.851	182.982	179.576	204.478	182.124	166.114	168.013	131.106	188.742	144.967	114.88	99.091	63.9566	94.2013	224.499	205.437	176.726	96.869	49.437	48.5956	120.431	100.643	194.379
751	179.274	160.404	163.962	110.738	189.484	162.174	44.0567	84.7826	53.4988	61.9836	165.789	159.384	220.221	187.324	162.983	33.6932	53.7113	45.3259	151.325	162.239	134.394	130.688	136.707	83.4663	120.018	181.646	179.391	201.284	180.722	165.261	161.938	130.749	187.491	145.594	112.988	99.3388	66.4647	91.831	224.078	203.815	174.284	97.5705	49.4334	47.1776	123.266	96.9605	193.897
752	180.259	161.07	166.659	106.025	191.1	163.154	42.4429	85.237	51.1225	69.0203	166.37	158.288	218.394	187.64	160.936	32.4082	50.3442	44.9728	149.065	161.86	131.575	129.496	133.455	80.7562	114.457	181.742	177.508	203.313	181.84	164.116	162.535	130.443	190.331	144.939	110.829	100.718	69.1585	92.2566	225.933	204.118	175.393	98.9271	49.5292	45.7345	125.88	94.1812	192.901
753	180.378	162.599	166.265	108.818	192.7	166.164	40.0925	80.2383	50.4314	72.481	167.968	157.906	217.368	185.534	162.144	32.1705	49.7905	44.9525	149.203	160.316	130.896	130.435	131.941	78.8645	109.575	182.572	174.341	201.684	183.759	164.673	160.895	132.255	189.335	145.872	111.017	100.577	70.4774	91.0549	226.883	205.091	173.321	98.8369	50.2177	45.4466	129.055	87.3719	192.955
754	179.387	162.724	167.453	113.139	193.629	166.843	41.1628	73.2998	49.5492	77.3317	170.666	156.7	218.781	185.752	164.038	34.7657	44.5669	43.6041	151.119	155.363	133.029	131.748	132.103	77.5153	111.76	179.284	169.622	200.475	182.42	165.671	157.729	129.85	188.537	146.56	112.061	104.031	73.9557	91.1538	226.147	203.475	174.361	98.0749	50.4624	45.1605	133.926	86.809	196.348
755	179.675	164.242	167.216	121.342	192.112	170.906	42.4801	73.0677	53.2319	81.5754	169.646	159.794	218.347	186.867	167.574	40.2385	43.0274	43.0552	149.161	159.201	138.078	131.089	131.26	77.9209	113.797	182.284	166.032	199.609	185.129	165.336	157.501	131.783	188.369	145.783	110.957	107.175	77.553	90.815	224.347	201.92	176.73	96.4145	49.5617	43.567	139.212	85.0481	198.011
756	180.29	162.255	166.769	128.69	191.672	173.385	43.2356	71.651	53.5299	82.6822	168.973	160.244	218.646	187.106	166.105	45.4058	40.5805	41.9924	146.648	158.445	142.007	130.013	127.944	78.6001	117.21	185.048	163.481	198.399	184.861	164.079	156.195	131.788	186.122	145.371	112.77	107.244	79.7487	91.1033	223.129	201.745	177.6	95.7694	50.1341	44.1609	138.53	82.5757	197.344
757	179.468	162.668	166.986	135.176	190.788	175.785	40.6182	73.3937	53.8183	87.4002	169.359	159.712	217.84	188.823	165.658	52.4825	40.2903	42.1689	143.625	162.023	142.297	130.596	126.394	79.751	120.832	186.145	159.547	199.443	183.646	167.09	149.248	131.252	187.607	144.843	111.857	106.765	79.916	89.5754	224.206	200.29	178.774	94.6204	49.2227	43.7776	137.922	78.913	196.939
758	180.225	162.01	164.709	143.403	189.224	173.335	39.1593	71.3017	52.1768	90.8658	174.174	162.033	217.604	187.505	166.399	59.9049	40.8136	41.6298	138.966	161.966	143.394	134.331	124.723	79.1619	124.583	188.317	158.103	199.836	183.576	164.153	151.76	133.596	189.981	144.607	112.14	103.748	83.2539	90.914	226.46	201.075	182.842	95.899	48.7011	45.6598	134.896	79.7956	196.536
759	179.891	160.398	165.609	151.913	187.84	170.369	36.1843	67.5105	47.6585	95.435	177.332	158.704	215.516	185.988	165.449	61.2896	41.7171	40.1043	138.513	156.682	143.138	135.655	127.288	75.7981	123.977	192.807	154.87	196.009	184.819	161.205	152.833	132.055	190.265	142.317	109.552	102.521	83.0776	94.4199	225.28	199.762	182.455	95.5913	49.3831	45.3035	132.916	78.9021	195.282
760	180.536	160.998	165.041	157.551	188.001	167.689	37.7996	63.754	43.7815	95.9439	179.17	157.221	216.418	186.766	164.749	59.6819	44.3325	38.9687	142.118	150.36	142.598	138.835	129.639	74.531	121.691	198.155	150.519	196.279	183.706	160.194	152.682	130.997	190.233	143.195	107.528	105.243	80.141	94.5575	229.344	200.956	182.42	96.2876	49.6153	45.8183	129.254	82.0465	195.558
761	180.393	160.83	164.585	159.261	188.171	166.955	36.853	61.0324	43.2104	94.3153	180.521	153.269	216.453	187.473	164.782	56.3492	45.4835	38.308	142.697	147.027	143.583	139.514	128.826	74.8695	117.766	199.419	147.629	194.723	185.207	161.338	154.347	133.066	189.945	145.978	107.43	106.827	72.6963	93.266	228.507	199.623	179.391	96.161	51.3364	45.5564	126.478	84.7692	193.936
762	181.778	161.109	163.145	156.925	192.481	162.865	34.3131	62.0232	43.7835	91.813	183.624	150.926	217.319	186.357	166.326	53.1359	43.7923	38.1241	145.802	145.793	145	138.921	129.072	77.757	115.904	203.273	149.285	196.115	183.708	158.126	153.481	134.594	192.8	146.614	106.572	105.627	72.7883	89.8625	230.172	201.989	180.207	96.8661	51.8782	46.5492	122.527	83.2108	190.949
763	181.589	160.603	162.921	152.242	194.583	159.905	35.0281	66.6718	46.3486	89.8814	183.188	150.903	216.751	185.899	167.666	49.9743	41.6793	38.3188	149.327	145.71	146.867	136.537	130.921	84.0816	116.814	204.261	151.739	193.931	183.578	155.342	154.599	135.984	193.444	148.822	105.01	104.961	67.9427	86.8884	229.966	199.852	176.364	99.9886	51.6033	47.5192	120.906	82.7162	187.001
764	181.844	159.694	162.533	147.233	195.179	159.577	32.9486	67.7377	49.3542	88.5713	180.04	147.738	216.948	185.557	168.815	46.2633	40.4036	38.0065	150.261	147.417	148.472	135.338	129.568	87.881	119.835	205.52	153.158	190.936	181.494	158.187	155.026	136.703	194.708	149.247	109.648	105.208	69.2891	84.7687	228.585	198.951	173.231	101.42	53.0399	49.3735	119.954	81.925	187.949
765	182.269	158.932	160.388	144.014	196.431	159.728	29.0121	70.3721	47.5745	85.7335	176.105	152.067	215.275	186.1	169.146	44.0983	39.3205	39.7245	149.535	147.56	149.005	135.112	129.263	93.7432	116.393	204.992	155.128	191.575	180.819	157.359	156.5	133.62	193.314	148.635	108.333	104.156	71.6749	81.6108	225.843	199.771	172.75	102.638	52.8943	48.217	121.331	84.6389	188.523
766	182.133	157.673	160.225	140.344	196.638	159.937	27.7969	69.6394	43.2341	85.3083	174.608	154.555	214.797	184.346	168.575	41.7537	38.5472	40.0763	149.302	148.228	145.063	130.892	127.115	94.1119	117.468	202.688	156.536	189.517	180.812	159.144	156.365	129.889	193.975	147.356	106.302	105.895	75.7157	78.5065	228.015	201.936	172.938	100.88	52.7589	49.9341	119.591	83.6301	190.871
767	184.774	155.041	157.441	135.627	197.337	158.467	25.1327	71.8892	42.0475	85.1887	172.764	158.55	214.416	186.338	167.468	42.7482	35.9631	40.4092	151.101	148.606	145.055	130.824	122.794	94.68	114.195	198.763	156.224	190.177	179.302	160.114	157.734	128.223	191.899	147.027	106.716	103.627	78.0584	77.0742	225.582	199.73	173.117	101.953	53.6746	51.9235	120.589	83.0945	188.933
768	185.65	156.526	158.208	129.79	196.71	159.803	26.114	69.0873	40.5033	87.4133	170.3	159.641	213.776	185.168	169.425	44.8217	34.113	40.5569	154.965	147.517	142.89	130.503	120.952	95.2709	111.485	193.961	153.118	189.304	179.761	159.627	157.185	125.239	193.188	144.876	106.11	100.328	77.9962	80.5576	225.413	200.381	175.009	101.509	53.3152	53.204	119.854	82.5653	189.78
769	185.998	155.837	157.671	125.896	197.108	159.581	24.9182	60.9902	37.8255	91.9415	168.735	161.059	212.824	184.701	168.275	45.4025	32.5045	41.3758	155.143	146.093	141.146	127.77	119.229	98.6584	111.531	188.608	150.652	190.792	182.056	160.088	156.04	122.409	195.784	144.002	104.397	99.7958	77.6556	82.8677	225.778	199.586	172.619	100.302	53.2744	53.8911	118.737	80.6354	187.262
770	185.909	154.962	157.294	126.396	198.298	157.467	24.7625	58.9557	37.3856	98.415	170.387	159.062	211.452	184.427	170.149	42.7805	32.9023	42.2921	156.749	143.393	139.165	121.175	119.845	98.9472	110.869	182.545	149.274	188.917	185.225	161.612	152.85	122.741	196.018	146.797	104.317	98.4806	77.6515	83.9335	226.847	201.061	173.001	100.346	51.9612	53.3654	115.544	80.2122	188.013
771	187.624	155.164	159.368	130.026	199.128	158.917	24.1905	56.7276	38.6311	102.563	172.717	159.292	211.366	182.206	166.398	40.8239	32.469	41.3515	158.848	144.462	138.094	116.507	119.32	100.195	111.27	176.583	147.58	191.983	186.592	164.102	150.997	121.586	198.192	145.212	105.179	92.9894	78.8549	83.3529	225.794	199.189	169.295	101.772	51.6791	52.3891	112.326	79.268	186.262
772	188.154	155.71	159.965	130.646	197.406	158.422	29.8769	59.6546	39.6171	98.0092	173.125	157.27	211.839	178.286	166	38.791	34.0818	40.1565	157.844	144.457	138.677	113.837	118.637	98.8885	112.162	169.398	144.445	189.802	187.741	163.819	148.985	120.843	200.29	146.068	104.966	91.7346	77.3053	84.5894	222.812	200.773	170.374	101.883	50.9536	51.7784	110.133	81.9439	183.488
773	187.573	156.386	159.399	133.364	197.123	157.266	37.3827	61.7782	44.775	93.1521	173.755	155.81	211.927	177.611	163.641	37.3661	35.3075	38.3812	152.423	145.115	137.624	110.715	119.915	97.2603	116.776	161.885	141.778	192.783	189.415	162.627	149.5	122.799	201.195	146.416	103.005	93.5138	73.5076	85.2981	226.055	200.46	168.737	101.155	50.2588	51.9386	115.083	79.793	180.789
774	188.428	155.786	158.954	135.3	195.638	156.467	40.9167	64.1012	47.4112	87.9166	174.474	155.926	209.908	178.833	164.522	37.9117	36.5963	35.9137	151.366	146.408	135.236	110.311	123.323	95.2487	120.66	161.767	140.017	192.87	191.386	162.686	151.762	121.908	202.465	144.325	103.545	93.3393	71.5344	82.4128	227.324	199.004	172.866	100.553	49.6144	51.293	123.362	77.2513	179.901
775	188.387	156.986	158.463	133.006	199.044	156.202	45.1535	64.7198	50.6293	85.2382	173.025	153.741	210.671	177.253	162.914	37.0846	42.5071	35.145	151.927	145.972	131.748	108.663	124.576	95.711	124.511	164.294	141.402	193.956	191.614	159.394	150.308	121.802	202.914	142.773	104.229	93.2382	69.5941	83.168	227.137	201.039	175.979	99.5374	48.2433	50.785	130.373	76.7238	178.376
776	189.65	156.995	158.583	129.273	201.81	154.134	49.9771	66.8441	55.413	85.214	174.023	154.08	211.817	177.598	162.906	35.5136	47.1226	34.1748	151.263	145.149	127.793	109.337	125.37	96.204	123.62	167.732	142.065	195.386	188.541	158.971	149.098	122.438	200.891	148.461	103.64	87.6571	70.1205	85.1406	225.09	199.161	178.494	99.2166	48.3378	50.5763	136.156	75.382	179.085
777	189.263	156.386	157.859	131.456	203.509	151.766	52.2537	67.7931	57.2275	83.8245	175.226	156.339	211.442	179.222	162.941	34.5195	46.596	34.2943	155.071	147.609	126.266	113.109	124.975	97.3891	131.098	170.057	141.425	194.138	187.832	158.654	147.886	118.958	200.715	148.644	103.442	89.1865	68.2866	86.0266	225.149	199.096	180.639	99.0062	46.9624	51.048	140.087	76.0038	180.242
778	190.652	156.573	156.59	135.287	204.194	152.499	51.5165	73.7705	56.4852	85.7346	177.756	154.686	209.008	178.203	164.213	31.4542	44.7712	35.5304	152.671	148.086	126.996	113.909	127.528	95.7008	134.457	171.852	139.3	197.203	186.444	163.267	148.197	118.611	201.873	148.545	104.385	88.032	67.0075	86.6919	228.685	196.408	184.378	99.4022	47.4919	53.106	145.748	76.0741	182.053
779	190.602	158.22	156.9	138.935	204.435	152.466	52.5367	76.7084	57.8071	84.8096	180.574	151.829	209.378	176.609	164.241	30.7365	41.1858	36.7796	148.017	145.179	127.466	115.433	124.936	94.3816	133.716	169.4	134.274	194.701	184.872	165.999	145.176	117.707	201.729	146.396	101.112	83.7131	66.207	88.795	225.41	197.115	182.853	98.7964	48.5525	53.0002	143.965	71.7524	180.77
780	190.579	158.242	157.184	142.226	203.57	151.304	50.1329	75.7559	60.2579	84.7611	180.492	153.256	207.705	174.897	166.302	29.8215	40.6634	40.4234	144.476	142.407	127.165	114.387	120.877	93.4049	133.008	167.901	130.338	195.137	187.803	168.062	145.792	118.339	201.116	146.86	102.565	82.9027	63.9837	88.0161	224.791	194.348	188.158	98.8177	48.0952	54.368	143.927	69.6736	180.376
781	190.69	159.09	157.152	144.694	204.988	153.255	49.654	72.1232	61.7835	85.0069	176.193	152.414	208.619	175.643	165.594	32.608	40.0817	41.9554	138.958	138.648	126.754	110.512	119.933	90.6104	128.291	165.67	127.347	194.213	187.405	170.599	145.784	120.936	202.825	144.503	101.714	84.267	64.0826	87.4424	227.238	192.913	186.757	99.269	50.3035	54.1953	140.864	69.1154	180.934
782	190.824	160.664	158.203	141.455	206.159	154.597	50.7492	67.0786	63.3503	87.8707	175.632	157.016	208.607	178.103	166.038	32.7314	41.632	43.4789	135.502	137.154	126.317	111.59	117.092	91.649	122.508	165.979	125.347	192.255	188.083	170.991	145.224	119.239	202.133	145.994	102.117	84.9652	67.0186	82.5209	226.528	192.648	182.645	99.7079	50.6139	53.5075	141.485	68.5806	181.683
783	191.313	159.666	158.916	138.612	207.727	155.594	54.0096	68.1818	62.2091	89.7612	173.5	160.93	209.372	180.194	164.891	31.9047	41.8972	43.3449	137.605	136.005	126.828	114.092	116.652	92.3758	119.986	168.322	125.255	189.665	187.887	173.532	143.849	121.582	201.681	144.693	101.741	84.3943	71.3593	80.1554	226.634	191.404	183.81	99.9144	49.7794	54.049	141.705	70.1355	180.251
784	190.579	160.731	158.957	134.037	209.938	155.268	55.7021	65.9121	57.0823	89.3094	172.663	161.434	211.239	180.142	164.274	33.7368	42.5527	41.4646	136.238	134.038	127.788	113.985	119.112	92.6614	123.34	169.076	125.594	190.504	189.49	174.913	145.17	122.353	200.239	141.053	99.9348	84.9445	80.3762	77.4445	225.76	190.854	184.298	99.6598	48.4369	53.5376	144.546	72.9731	178.321
785	190.475	159.787	159.518	132.185	216.521	157.912	53.3233	69.7064	52.9052	93.5848	169.571	161.79	213.421	181.071	164.476	32.9219	43.7852	41.0539	135.869	133.664	128.132	111.883	116.949	96.1516	124.426	169.949	125.383	187.439	190.256	174.123	147.96	121.832	200.483	142.935	103.387	85.5113	85.7502	77.9799	227.545	191.914	184.929	99.0405	48.034	53.6977	144.819	76.5806	177.013
786	189.496	159.773	158.401	133.756	217.709	157.429	52.3563	68.4975	46.7994	97.2347	166.37	163.267	213.57	181.03	161.501	30.8284	43.3288	38.5343	137.286	134.67	126.5	105.888	119.37	94.7653	123.849	164.337	130.238	184.944	190.295	171.552	149.44	120.354	199.776	144.818	100.118	81.3259	87.6932	77.1151	223.587	190.042	184.081	97.4536	46.0904	53.6174	142.873	81.2245	176.741
787	191.2	159.895	157.195	137.598	217.111	155.757	48.2174	64.5298	43.0263	101.316	163.507	162.193	213.744	179.777	161.935	30.7185	43.9263	35.0354	138.078	135.011	127.988	106.994	116.738	90.002	126.015	160.914	133.903	186.365	191.7	171.084	147.428	119.836	198.856	143.167	100.575	79.4455	87.4735	77.738	226.14	193.755	182.777	96.1096	45.7608	54.475	144.008	83.6915	176.922
788	192.433	158.558	158.528	144.018	217.787	153.725	43.0201	61.0328	41.3652	103.492	159.867	161.113	212.391	180.058	161.832	30.463	41.1204	33.0058	139.219	134.873	130.416	107.508	113.54	87.8644	127.245	158.456	143.452	187.052	193.481	170.116	151.694	117.322	197.566	146.245	104.347	82.4833	89.649	80.226	223.724	193.455	177.853	94.7548	44.905	55.7964	142.683	82.0783	175.975
789	193.002	159.882	158.687	147.964	216.775	153.248	38.1377	60.633	40.834	104.321	159.718	160.867	213.369	178.81	162.751	31.5557	37.2581	31.083	139.509	136.819	131.855	106.571	110.424	84.1032	125.98	159.245	151.602	189.814	192.814	167.688	150.797	116.093	197.76	147.248	106.018	81.9262	90.9775	78.1427	222.209	195.398	173.713	94.1912	44.2182	55.4097	140.604	78.3867	175.113
790	192.016	159.672	157.407	148.864	214.167	149.564	34.1569	59.1887	36.6383	104.236	161.794	160.564	212.29	178.134	164.288	34.4227	35.8617	29.6835	139.997	138.603	132.963	105.695	108.987	80.6856	125.37	162.5	155.264	189.036	194.839	163.574	154.865	117.091	193.634	146.094	106.054	79.4187	90.8547	79.984	221.868	192.994	172.94	94.1582	44.4094	54.857	140.752	77.2383	175.122
791	192.441	161.055	157.69	151.66	213.586	154.855	29.8718	58.5225	34.9399	102.665	162.046	156.163	210.422	177.792	163.177	33.7903	32.8928	28.6774	137.938	141.691	134.556	106.895	109.089	79.2926	125.085	168.206	156.033	193.343	193.744	168.563	153.914	116.072	193.234	143.897	104.153	77.9267	95.4967	79.9697	221.365	189.824	174.222	95.7144	44.7891	54.5134	141.099	76.64	174.158
792	192.646	161.666	156.543	152.305	213.085	155.956	31.6629	62.3983	34.3529	103.461	160.427	157.388	209.364	176.975	164.704	32.458	30.8003	27.3	136.642	148.193	140.961	112.03	107.455	80.1521	123.999	177.198	155.741	195.851	191.173	169.737	156.599	116.412	194.638	144.12	104.048	74.589	98.0822	79.3214	222.912	188.692	175.221	94.9773	44.8973	53.979	141.127	77.3438	176.14
793	191.611	161.544	155.622	152.631	211.85	158.15	30.8843	59.8577	37.6007	105.32	156.606	159.057	211.506	176.754	164.643	29.4057	30.4279	28.362	135.244	148.096	142.041	117.275	105.431	82.1416	122.172	182.881	158.255	196.857	191.415	167.859	157.72	119.881	195.096	142.98	101.833	71.1207	99.9331	79.8374	221.689	190.126	174.035	95.4899	45.5435	52.82	144.767	77.8875	177.017
794	190.726	161.453	155.137	151.902	209.6	158.657	31.9877	55.3043	41.9172	109.812	155.74	159.376	211.961	176.325	163.569	27.7773	29.8204	30.9362	133.471	150.168	138.301	119.495	107.287	83.0396	114.888	187.303	156.677	195.518	192.044	165.928	157.244	120.379	195.842	143.07	101.577	67.3955	99.5931	79.4969	218.574	190.225	175.399	95.132	45.2431	53.1488	147.065	83.4453	178.488
795	191.397	161.862	154.718	151.118	207.12	159.262	34.0383	51.3467	46.3112	115.685	153.564	157.389	210.034	176.234	167.914	25.2121	29.9666	35.7507	130.324	150.84	137.825	119.265	108.959	82.3349	108.833	186.536	155.072	195.813	189.226	166.074	157.55	123.451	195.191	143.222	98.5999	66.2253	99.0406	80.0875	220.003	188.634	176.809	94.0817	45.0437	53.9821	146.216	85.206	178.277
796	191.093	162.552	154.671	149.086	207.036	156.447	36.3405	47.9827	50.7588	123.65	149.338	158.85	210.522	176.346	169.116	26.2613	31.3945	41.8398	128.866	151.505	138.952	116.615	111.247	81.5272	102.769	183.868	154.549	193.86	187.694	167.746	156.473	123.246	194.467	144.301	99.0618	66.8599	96.5322	82.7443	216.968	187.963	177.983	93.4861	45.9243	53.7319	143.508	86.1798	175.971
797	192.792	162.12	154.302	145.653	205.526	158.385	37.9675	43.7779	51.5604	131.204	150.185	156.711	213.27	177.4	173.084	25.2079	32.3007	43.1004	125.816	153.069	140.329	113.137	116.815	80.4302	98.2286	183.258	153.598	190.374	181.852	163.23	154.911	123.591	193.791	143.036	99.0696	66.7284	95.4738	88.1101	216.193	190.227	176.208	93.5618	46.0808	53.0624	142.177	87.1566	173.44
798	191.413	161.982	153.809	143.486	205.991	160.344	39.7742	40.6847	51.3188	135.279	147.938	159.427	212.796	176.08	169.719	26.4831	33.7202	46.588	125.195	153.592	140.278	114.342	116.614	79.4826	94.6256	177.875	154.676	189.472	182.894	165.305	156.871	123.713	192.62	142.947	99.4611	66.8904	97.0993	90.0906	215.819	189.263	178.778	93.35	45.4052	53.5869	143.57	85.8852	171.386
799	193.739	161.889	153.496	142.881	203.322	160.824	44.2287	40.8718	51.4666	133.564	148.614	162.841	211.894	176.316	167.167	26.4807	34.5699	48.2747	125.133	152.591	138.531	118.727	113.302	80.7581	92.618	173.503	158.224	187.858	184.315	162.07	155.65	123.752	192.405	142.526	97.7554	66.7156	96.6994	90.207	215.24	187.29	179.45	92.9725	44.8015	52.6422	146.885	86.0873	172.521
800	193.548	163.05	155.489	139.154	202.187	162.245	46.7569	42.9806	52.0777	131.232	149.222	163.476	211.462	174.845	167.183	28.9174	33.7542	49.2241	126.462	153.672	136.117	122.192	112.756	83.6042	93.6454	170.643	161.442	186.754	182.471	159.717	153.559	126.692	189.377	139.154	97.8963	66.6181	97.1244	94.639	209.852	183.133	175.582	92.5946	44.2518	52.3763	152.255	84.4511	174.044
801	192.832	162.436	155.119	138.66	198.87	159.7	46.9907	48.0786	53.9291	129.201	149.018	160.737	212.751	174.547	165.921	31.8887	36.1606	48.1905	124.556	154.302	133.978	123.923	109.915	84.4801	94.2235	166.66	165.032	186.013	185.105	159.879	155.017	125.537	190.437	137.844	99.7825	68.1113	95.1005	93.5187	209.264	183.132	176.69	92.2244	43.9404	52.088	155.418	82.1013	176.904
802	194.523	163.221	155.092	135.705	197.329	160.531	47.4661	48.3613	54.9919	124.889	148.884	160.8	213.223	173.241	164.157	35.8325	37.7166	47.5046	122.676	154.577	134.038	124.293	109.702	84.0299	91.8035	164.5	163.414	185.547	185.041	160.722	152.423	124.266	190.468	136.159	100.993	69.51	95.3108	90.4912	209.668	178.99	172.754	89.9173	43.8335	51.113	154.311	86.037	178.651
803	193.684	162.955	154.822	131.2	197.89	162.522	45.3646	52.6937	57.4101	122.057	147.489	162.642	215.612	172.139	163.583	40.9102	41.3923	47.0794	118.568	153.393	131.075	124.458	104.174	84.2654	87.895	163.157	163.736	187.288	186.043	161.31	155.607	125.137	190	133.382	99.9166	71.3217	95.442	87.5569	211.368	182.783	171.459	87.1476	45.806	52.8442	150.518	90.0837	178.038
804	193.822	162.511	155.288	128.814	195.888	163.892	40.5905	55.7223	56.8018	118.816	147.85	160.956	215.786	171.953	162.562	42.3664	45.3451	44.6396	118.332	154.11	128.851	127.838	100.935	81.7428	84.2686	161.465	163.331	188.829	190.239	159.399	151.528	121.264	190.29	134.88	96.6201	72.1739	95.724	85.9937	212.056	180.202	167.671	86.6271	46.0258	53.1912	147.165	89.2214	182.29
805	194.136	162.386	154.938	128.109	196.815	165.299	37.2929	63.3909	51.5894	113.947	147.898	164.132	215.57	173.569	164.92	41.9733	51.5677	42.7848	121.14	155.667	124.1	132.869	98.3823	79.6432	80.5399	159.824	167.927	188.952	188.454	160.735	153.172	118.26	190.961	133.243	96.2243	70.2319	97.1334	82.3443	212.382	178.561	171.701	84.9889	44.9544	53.8036	143.717	87.8924	183.293
806	193.77	161.402	157.26	128.206	196.596	171.138	34.0988	67.3151	49.6306	112.067	151.284	163.886	213.696	173.837	163.097	39.6416	57.2568	41.0565	122.557	158.598	121.166	137.671	95.4547	80.4322	81.9103	164.365	171.141	191.482	189.775	160.95	152.355	118.078	191.058	131.789	94.6164	69.8032	97.9255	85.9461	212.702	177.905	171.836	85.5383	44.4884	53.6484	143.016	88.0357	182.896
807	193.174	161.929	158.278	132.863	198.491	173.924	33.8872	70.0603	45.8662	112.129	154.603	160.677	213.88	171.411	163.179	35.6867	60.1157	41.4882	124.585	160.517	119.626	139.772	96.4639	77.9464	84.5149	164.658	175.278	192.263	190.474	162.626	151.896	121.067	190.408	134.264	93.7069	71.2539	101.067	90.4808	206.763	177.097	172.795	85.1979	44.5426	54.4076	145.891	89.3895	183.2
808	192.32	161.332	158.542	138.447	200.017	176.608	34.134	72.6636	42.5002	108.514	157.935	158.475	215.045	171.255	164.281	33.1029	59.1441	39.7508	121.849	161.99	121.761	139.131	95.5199	75.073	86.5396	163.959	180.139	194.558	192.588	162.9	150.267	115.481	190.894	136.784	94.5701	73.5644	102.609	92.8611	211.624	175.043	169.743	85.0244	44.1969	55.5729	151.123	89.646	182.584
809	191.474	161.921	158.044	140.393	204.084	177.818	32.3136	70.4357	40.81	104.849	160.875	159.499	216.788	171.856	164.957	31.4105	57.0365	39.6175	123.302	162.43	125.409	137.137	94.202	75.654	89.1892	165.019	182.315	191.031	191.862	164.638	148.542	116.433	190.502	136.475	92.5257	77.173	100.565	91.1148	210.78	176.663	169.24	84.6048	45.6711	54.8061	156.519	87.2503	181.928
810	191.423	162.829	157.394	140.646	204.889	176.073	28.6466	66.2628	40.9931	104.428	160.604	158.201	216.108	170.925	164.725	29.4685	56.7781	40.4194	121.766	162.205	129.093	143.853	95.6781	75.9391	88.0896	168.353	184.007	191.433	193.942	163.056	148.329	114.469	190.526	134.446	92.4297	80.4476	104.331	87.1785	209.831	176.297	170.624	83.1224	46.0945	55.1327	161.833	87.4013	181.436
811	191.457	163.727	155.575	138.319	206.3	175.421	27.3963	67.1123	40.6765	100.74	160.065	157.179	215.82	170.072	162.077	28.0486	54.6954	40.9123	126.143	159.801	133.356	147.75	95.4196	78	89.2451	171.141	183.968	190.75	191.61	164.9	144.515	112.915	190.603	132.891	93.0528	79.4355	103.714	83.8885	213.137	174.413	170.379	83.3996	46.2198	53.8635	163.136	84.5789	181.268
812	193.211	163.197	154.175	133.429	209.364	173.772	23.3525	65.3529	45.8443	98.5842	156.268	155.212	215.744	170.791	161.272	26.4492	56.5037	39.6327	127.936	159.57	132.584	146.763	97.6918	81.1212	92.7966	174.998	183.019	190.097	192.126	163.658	145.328	116.153	189.587	132.738	93.9526	79.3521	98.8679	83.0972	214.673	175.005	171.077	83.6227	47.5761	53.4096	162.586	82.911	178.627
813	193.142	164.39	154.521	130.002	206.361	170.763	23.016	67.7285	53.5702	93.9367	149.911	151.197	214.402	170.25	161.026	26.1585	54.165	37.9605	129.322	157.061	132.373	147.1	103.956	81.5739	95.665	175.141	182.699	188.392	186.625	161.132	147.136	116.414	190.065	132.144	94.202	78.3755	94.2138	82.7453	213.821	173.531	172.937	82.5436	47.8796	53.7223	158.689	81.8776	177.237
814	192.042	163.215	155.482	127.475	207.751	169.099	21.3488	61.5781	62.3136	88.4829	145.14	150.437	215.07	169.535	160.805	29.1446	50.2946	36.9743	131.022	156.502	134.573	143.755	107.686	81.7188	98.4275	175.145	182.25	188.46	183.377	153.048	145.19	115.208	193.236	134.18	95.8479	76.3971	90.538	84.144	214.791	171.603	176.394	82.1593	49.0143	54.5134	155.371	79.3225	177.414
815	192.184	161.641	155.61	125.387	208.05	162.735	20.6175	59.6872	66.6367	86.1149	141.51	144.185	214.336	167.646	158.01	33.5626	47.4238	33.5422	133.919	154.221	136.645	142.326	107.27	80.0748	95.2261	172.38	180.812	190.106	182.627	154.273	147.861	115.341	194.37	134.139	95.189	73.5828	85.2269	88.1524	213.583	175.743	179.685	83.8598	49.2509	55.0273	153.26	75.9349	179.658
816	191.355	162.813	156.27	120.832	208.784	162.453	19.946	55.6077	70.2403	88.7309	138.101	140.446	215.216	167.802	156.628	34.9032	44.1796	31.0703	134.934	155.439	138.929	138.447	102.135	77.5333	91.4193	170.745	182.364	188.746	180.233	154.392	146.916	117.112	194.92	133.109	97.5509	73.8398	79.9325	93.4603	213.572	174.121	183.143	83.6197	49.2392	55.1037	148.493	72.3927	180.667
817	191.761	160.476	154.911	118.808	209.955	159.997	23.6188	53.0445	65.8435	92.3116	138.77	139.184	216.143	169.092	154.168	34.3997	41.3207	28.165	134.372	157.768	138.284	135.117	98.0632	71.9348	90.7238	171.277	183.896	191.86	176.88	154.486	146.612	117.107	193.068	131.263	96.7441	70.198	76.5233	96.2337	216.488	172.163	181.197	83.1247	50.5402	55.3936	146.557	70.7991	180.327
818	191.163	159.506	151.506	117.957	213.518	162.33	29.5709	51.1462	62.6348	92.618	139.894	134.993	216.627	168.942	151.17	34.241	41.1994	29.2173	136.386	155.392	140.772	130.66	92.19	68.8885	93.1616	168.36	187.674	192.052	174.85	157.925	146.437	118.845	194.453	130.546	97.136	69.6784	71.1097	99.4783	217.954	174.19	179.509	82.081	51.1388	56.3339	143.379	70.651	179.091
819	190.672	156.546	151.939	116.147	215.099	165.583	34.3929	46.2631	56.9135	93.94	141.465	134.469	215.716	170.436	150.732	37.2156	41.778	28.5136	140.766	152.836	139.04	124.519	93.3936	66.8934	98.8484	163.394	187.128	193.676	174.355	158.368	146.355	119.568	193.658	130.458	95.4892	68.5747	68.7455	100.196	216.534	173.746	176.096	82.6702	51.3013	56.9799	140.261	70.3533	175.775
820	190.644	156.71	149.718	114.751	217.965	165.531	36.149	44.6843	52.1978	92.7243	143.675	134.638	214.949	169.439	150.118	38.8569	40.7764	27.7463	141.201	150.204	133.96	125.172	97.4092	67.1256	105.088	163.422	184.648	192.204	173.68	155.729	141.677	123.416	191.339	127.852	95.0208	72.4199	69.8675	96.4381	215.122	173.863	174.431	82.0164	50.2689	57.2829	139.488	69.769	176.445
821	189.836	157.919	149.39	116.108	217.813	168.006	35.4543	47.2818	46.8824	90.6306	144.986	132.221	215.107	170.648	151.457	36.2518	42.4852	27.389	143.113	151.686	130.321	122.721	106.307	71.125	112.241	163.846	180.725	193.823	173.117	157.751	151.339	121.649	194.804	126.831	94.7721	69.7191	72.1102	93.5754	216.818	175.999	173.784	83.036	51.1789	56.4363	138.942	66.7554	177.736
822	190.283	156.224	150.217	123.048	216.856	169.155	33.1656	45.8072	43.0939	88.5215	145.067	132.294	214.617	169.29	151.46	34.4937	44.7212	28.0269	143.328	153.049	122.714	121.384	116.283	76.0377	118.414	160.052	177.516	193.508	175.9	157.488	147.378	120.03	195.644	124.294	93.8875	67.2887	71.6045	91.1955	216.578	175.94	173.146	82.4295	50.4381	57.2779	138.858	64.9297	179.06
823	190.174	157.75	149.411	130.521	213.511	170.117	31.4415	41.3372	39.3262	85.7925	144.396	129.038	215.059	169.831	152.532	32.3029	48.7175	27.114	144.293	153.408	118.529	120.138	126.328	80.4562	117.134	154.668	172.876	195.893	177.655	160.513	146.614	120.718	196.014	126.035	93.1822	63.6691	73.9408	93.1785	217.266	174.879	173.449	84.0702	50.0079	57.2013	138.216	64.2226	180.344
824	189.011	157.004	148.578	138.646	210.372	169.262	26.7435	40.4351	38.2032	82.5845	142.131	130.055	215.175	169.37	154.611	29.938	53.9619	25.3493	141.885	151.341	114.918	117.438	130.166	81.3412	112.573	152.497	167.573	195.997	175.948	159.579	148.857	123.737	193.941	122.502	91.9206	60.5683	74.1856	95.0889	219.03	174.66	174.474	86.481	49.4783	57.9319	136.5	64.8247	180.554
825	189.518	157.117	149.944	144.301	207.239	169.959	26.2978	42.1405	38.5602	82.5025	143.905	131.974	215.197	166.421	154.544	32.6339	53.6933	23.308	141.846	148.656	115.202	112.585	132.311	82.6416	106.041	146.214	163.375	196.661	176.643	163.586	150.413	124.582	193.459	121.223	94.1803	63.1188	75.724	93.9871	220.819	176.235	171.961	89.1579	49.8284	56.4131	135.661	63.9845	180.466
826	190.35	156.805	149.902	149.352	204.484	167.586	23.8044	39.8627	42.2311	82.9877	144.577	130.937	212.575	167.547	152.958	33.2427	53.3224	21.4084	141.271	146.257	118.249	111.418	132.849	83.7458	102.303	149.737	159.684	196.728	176.634	164.217	153.191	122.476	192.311	122.251	95.4006	64.2659	74.0794	92.5216	221.37	178.756	172.39	90.288	49.7091	56.9236	140.507	64.3607	179.534
827	189.692	156.943	151.347	152.502	201.948	167.238	20.7942	40.5223	45.2912	85.0408	145.826	130.419	211.023	167.817	151.102	37.4096	50.7806	20.269	141.781	145.866	122.554	112.465	134.398	84.2653	98.732	154.82	155.012	197.086	175.059	164.506	153.266	121.286	191.022	122.344	97.4327	67.6072	74.4352	89.1636	218.27	177.291	171.68	91.2454	49.0961	56.3482	141.833	64.6545	176.908
828	190.249	156.007	151.276	152.95	202.737	171.089	18.6998	37.4568	47.2461	93.4191	144.744	131.63	210.642	169.272	151.41	43.6353	46.5411	19.3422	144.57	145.62	125.617	117.41	131.957	86.6439	96.6534	155.971	152.822	199.012	176.869	165.58	150.336	119.838	187.229	123.608	97.8481	69.3564	72.2834	86.4346	219.368	180.343	174.258	91.4073	48.136	57.7637	141.702	64.8495	175.022
829	189.18	154.669	150.827	151.189	203.646	171.948	16.5887	38.8338	48.8758	101.923	142.273	131.932	209.846	169.531	150.932	46.038	43.8637	20.6468	147.771	145.467	128.911	124.009	130.261	87.4255	91.8785	153.901	149.619	196.754	179.836	163.839	151.551	117.923	184.602	122.729	97.3918	68.391	72.389	85.089	217.987	182.331	172.377	89.9531	48.4489	58.1405	142.741	68.846	174.342
830	189.725	155.035	151.544	153.757	204.842	172.981	18.6169	38.6087	47.4215	105.805	141.652	134.302	207.947	167.191	150.357	47.894	40.9402	23.2334	147.58	146.654	133.861	125.252	126.125	89.6191	87.3463	150.42	151.027	198.937	181.863	164.227	148.167	115.751	183.635	120.278	97.0305	69.2619	71.9515	87.4875	215.346	179.655	171.876	91.5802	48.2866	56.5056	142.587	69.8635	173.745
831	187.99	156.249	149.172	155.342	207.865	170.828	20.1336	39.4275	42.4255	109.947	139.23	137.585	208.142	168.131	148.673	49.1913	38.5231	25.3823	147.686	145.203	138.102	126.928	122.39	89.6378	82.9059	149.208	153.016	201.674	183.264	159.85	143.719	112.825	184.828	121.447	95.8371	71.1187	69.6751	88.2084	216.239	177.648	173.804	91.9464	46.9657	56.3879	144.896	74.6997	174.566
832	190.033	155.596	149.901	153.776	207.755	172.821	23.7125	39.5546	40.8514	107.439	137.105	136.606	208.164	170.846	148.231	49.2038	39.2475	25.4053	148.334	142.39	139.239	129.001	121.345	90.2538	81.1353	150.807	156.718	201.665	183.914	158.354	143.521	110.779	185.708	123.094	98.39	68.0326	68.585	88.2322	213.579	179.426	174.583	91.5838	46.4	55.8067	142.267	78.3529	176.975
833	189.098	154.881	148.766	152.248	206.781	174.775	29.8754	38.5345	38.2796	105.94	138.713	132.885	209.923	170.374	149.152	45.9524	41.4971	29.4471	147.106	140.749	141.248	129.551	122.082	88.6902	81.3472	150.562	154.879	204.134	184.962	156.065	144.353	109.663	185.789	122.019	99.812	67.0302	66.5504	93.4934	213.647	175.084	173.582	90.6135	45.9209	54.99	140.396	78.3751	178.74
834	189.53	155.105	147.61	150.014	205.039	172.016	35.1085	39.1441	35.3316	101.618	139.548	134.243	209.819	170.249	150.188	42.5807	44.3383	30.7098	145.941	139.772	142.037	132.119	122.042	84.1641	80.6533	153.601	150.28	201.055	185.965	156.097	144.576	106.047	184.793	122.628	97.7809	64.9504	67.4485	95.8858	213.522	175.653	175.778	89.3703	46.5465	54.0161	140.695	76.3943	180.95
835	188.706	154.198	148.83	148.392	202.099	173.136	39.0823	35.7555	35.2812	95.7191	136.069	133.051	210.781	169.076	152.526	42.143	47.2038	32.6344	143.283	142.301	144.759	135.737	121.377	78.2908	81.1753	156.553	147.424	200.303	185.371	157.584	144.533	108.548	183.223	126.95	97.5217	63.3494	66.077	96.244	214.47	174.724	174.028	86.5261	47.7584	52.4179	144.383	71.729	183.134
836	189.43	154.631	147.094	146.734	201.587	170.728	41.6215	35.6738	37.4981	92.2409	133.806	129.938	210.758	170.186	150.313	39.8887	48.0931	30.579	142.085	144.538	143.874	137.601	124.089	73.7369	84.6888	157.585	145.032	199.144	187.132	161.411	146.04	105.568	184.982	126.147	95.8507	62.3298	63.4775	97.8162	214.484	173.678	175.046	86.1179	49.5573	52.3582	148.324	69.7425	184.652
837	189.439	155.023	147.766	144.706	200.905	169.961	44.9906	34.5962	39.1936	89.1677	136.772	128.346	211.377	167.002	152.777	40.8489	48.9183	29.8584	141.835	147.825	145.379	133.3	129.426	66.6453	86.8109	155.715	143.788	203.004	188.048	161.537	145.278	109.077	184.805	127.38	93.8913	62.4892	63.5056	101.374	214.496	169.293	173.843	84.9438	49.5811	51.3109	146.553	70.9411	184.958
838	189.819	155.119	147.65	140.874	201.579	166.659	46.8743	35.6936	40.2137	86.1257	139.439	125.049	211.895	167.659	152.806	43.9982	46.7882	28.3866	141.155	151.32	146.64	133.797	136.537	63.0844	88.986	155.278	142.363	200.341	190.294	161.375	143.958	111.045	184.92	129.084	94.6415	61.6685	59.98	101.82	216.008	169.436	174.338	84.7981	50.0649	51.0237	148.597	73.8699	188.776
839	190.406	156.475	147.925	136.686	202.609	161.669	41.8925	33.7448	36.0219	87.1063	141.256	126.494	212.998	166.106	156.117	45.5364	46.2301	27.0253	140.266	151.997	149.707	133.596	143.772	60.0511	95.0897	153.945	142.5	201.673	191.452	165.477	145.644	109.739	186.764	130.591	94.5204	62.2329	59.5628	103.185	217.949	167.653	176.985	85.3078	50.4311	50.866	150.311	78.6617	188.527
840	190.307	157.446	148.373	134.637	202.326	157.909	37.5543	30.3998	33.4106	87.7509	142.983	130.016	212.357	167.469	156.446	44.0823	47.638	28.0072	137.761	149.869	148.642	135.027	146.44	62.1388	103.99	150.798	136.585	200.204	192.707	166.979	142.039	109.193	184.794	132.031	92.7617	60.8381	60.0297	105.458	217.772	168.597	175.266	85.308	49.9375	51.5617	149.467	80.4733	187.666
841	190.888	158.207	150.069	135.866	202.137	157.907	32.2641	27.8701	32.5349	87.5289	141.739	130.346	212.078	166.478	157.341	41.7788	48.2964	30.2091	137.117	147.778	143.946	137.147	148.981	66.2208	110.935	147.39	132.624	201.075	190.866	168.048	137.782	108.546	186.094	131.93	93.1818	61.1223	62.3943	105.723	215.275	168.342	177.3	85.6847	49.5515	52.2688	150.195	81.2724	186.324
842	189.589	157.374	149.482	139.788	203.948	154.741	29.6573	27.9058	33.5864	88.9563	141.876	131.559	212.543	164.9	157.306	38.315	45.5546	33.2005	137.367	143.588	140.123	136.288	153.48	69.9629	113.684	146.547	130.271	199.896	189.154	170.22	137.912	109.354	182.835	132.209	93.9713	60.0672	61.2177	106.849	212.128	171.328	181.243	86.1457	49.396	52.0447	149.853	80.2291	185.36
843	190.118	156.064	150.276	147.407	204.411	154.129	26.1085	31.1831	34.4933	89.2076	140.993	130.912	212.924	167.846	157.659	37.3809	42.7661	37.5629	137.383	142.205	135.369	134.897	155.095	71.1931	113.031	146.758	129.257	197.524	189.939	169.954	139.815	112.689	184.001	133.271	96.8842	59.2979	67.9903	103.404	211.755	173.643	181.151	85.6452	50.3774	53.2262	152.253	83.2735	184.897
844	190.608	157.375	150.884	152.902	205.551	152.621	25.705	35.1061	36.5394	89.4855	144.595	133.328	213.751	168.279	157.443	39.2928	40.826	41.8456	136.801	140.672	133.067	133.711	155.699	73.3682	112.127	146.475	129.039	199.674	190.174	170.93	140.384	111.102	184.25	133.531	94.8075	63.3567	71.3453	105.438	210.773	174.839	182.356	86.8313	49.7869	53.2403	152.611	84.172	185.007
845	190.109	157.109	152.119	157.308	205.588	153.777	22.22	37.3405	38.5102	89.7837	146.357	130.831	212.35	168.846	158.437	39.6143	39.2878	45.467	139.185	140.099	129.883	132.238	157.213	71.6716	110.028	148.422	128.704	199.818	187.298	174.389	140.558	109.723	182.672	131.036	92.1936	66.1027	75.994	104.294	210.264	175.267	183.139	90.6191	49.6672	53.0674	149.71	86.7139	185.633
846	190.461	157.919	152.464	158.555	204.631	151.537	20.4989	41.3227	48.0199	84.6745	145.774	126.434	214.796	167.251	159.258	37.8264	40.6336	43.2482	139.63	140.863	126.154	126.517	159.844	72.3381	111.574	146.967	129.014	200.123	185.415	173.886	144.14	108.194	180.117	127.412	91.8222	64.6938	74.1549	106.028	210.924	178.942	186.304	91.1534	49.1508	52.8816	149.073	86.1429	188.995
847	191.261	159.351	153.378	153.874	207.231	150.61	22.9813	41.8692	55.6447	80.37	144.464	124.661	213.532	168.067	158.311	35.0154	40.9896	43.2879	141.886	145.663	123.614	123.084	163.644	72.7377	111.863	147.724	130.923	197.799	186.146	171.446	144.013	103.652	181.861	126.378	90.7978	62.4048	71.4029	102.163	207.779	179.234	185.184	87.586	46.5799	52.6949	146.888	85.7443	189.472
848	191.172	158.751	151.572	150.287	206.554	150.273	25.285	45.2268	55.8383	78.9506	143.122	119.504	213.147	165.389	158.52	32.8053	42.5757	42.2852	145.176	150.97	122.817	120.24	164.402	76.2757	108.737	150.862	132.865	198.011	185.335	176.887	144.938	102.315	181.937	124.555	88.854	59.0807	72.3626	99.9764	209.72	178.174	188.065	87.173	46.5122	53.48	146.516	88.3479	188.761
849	191.641	157.431	151.009	148.344	206.191	149.678	25.072	42.5188	55.5407	78.7344	143.399	117.391	210.765	165.363	160.127	31.0264	45.1562	39.3193	147.256	152.968	125.019	122.022	161.624	80.6646	106.21	157.475	137.832	194.887	188.006	177.531	143.332	100.058	183.307	126.02	90.192	58.8296	75.1143	98.4223	208.222	178.043	189.4	86.0197	45.0885	52.6281	145.761	88.4064	187.964
850	191.935	157.065	152.143	148.476	204.615	151.973	27.0927	39.3274	52.1846	82.2721	141.697	115.364	211.09	163.485	162.423	32.1348	47.3489	36.3334	152.575	149.606	127.009	124.315	160.731	80.3638	106.845	167.29	141.707	196.015	187.666	179.11	151.95	100.351	182.192	122.956	90.4838	55.0249	79.3769	95.3939	208.76	173.737	188.11	85.4415	44.7607	52.2821	150.043	90.2793	185.438
851	192.621	155.385	152.072	148.149	204.761	151.017	28.7715	39.9868	51.5885	85.6034	143.172	115.236	213.321	163.912	164.357	33.2159	46.6467	32.6916	155.899	149.702	126.63	124.618	155.063	79.9972	105.05	175.076	146.005	197.855	187.685	177.941	151.789	103.786	180.636	123.688	90.1305	52.7907	81.3878	89.7638	207.916	174.026	187.873	83.2843	43.5539	54.5288	151.514	86.3162	183.939
852	192.431	157.521	153.751	150.313	204.661	151.839	30.5927	39.0874	48.8978	89.1894	140.361	117.533	214.17	164.163	164.914	34.9571	44.2706	31.4167	159.959	144.03	128.362	126.02	150.631	81.5953	102.336	180.328	147.435	198.601	184.231	179.898	154.581	104.258	178.484	124.614	91.6821	52.842	79.8169	85.9873	208.37	171.56	187.209	84.467	42.9579	55.1862	146.513	86.1057	183.326
853	193.354	158.096	154.503	150.422	205.904	152.608	30.8371	40.8647	45.9313	94.7955	136.996	118.291	214.057	162.333	164.319	34.7221	41.886	28.3259	161.153	143.886	129.469	124.371	146.199	81.5827	96.902	183.217	149.418	200.302	187.076	184.403	152.479	102.015	176.827	126.628	88.9364	53.742	80.3451	83.3762	209.784	169.404	183.104	85.0245	42.2253	55.492	144.728	85.0599	181.308
854	192.83	158.559	154.571	147.565	207.782	153.099	33.0716	39.0895	44.1107	100.145	131.215	120.554	213.493	165.02	162.642	35.3135	39.7606	28.3542	162.225	141.35	128.687	120.795	145.069	82.4466	92.7425	181.52	149.779	201.099	186.284	183.908	154.332	102.443	174.191	125.915	91.3326	51.7764	82.2545	79.3352	206.67	169.416	181.151	87.3616	41.9706	54.723	142.707	84.975	181.518
855	191.863	161.936	156.044	142.126	210.371	149.649	31.5106	33.9056	41.9562	104.571	130.037	121.012	213.152	165.838	162.506	35.1162	37.0069	29.0776	161.772	138.026	128.583	117.422	141.148	79.6206	91.2379	180.828	154.926	202.493	188.097	184.62	153.731	102.298	174.531	129.175	91.5823	48.602	80.7546	75.6524	208.186	166.134	178.165	89.5593	42.4593	54.9481	143.277	86.6162	182.295
856	190.815	164.338	152.545	136.604	211.189	149.917	30.4566	32.6657	39.1709	106.014	128.748	120.952	211.963	166.933	161.489	34.2064	35.0529	29.5476	158.041	135.564	128.548	113.937	135.339	75.2014	90.0707	177.148	156.279	203.626	189.673	189.34	150.634	103.34	172.578	126.936	88.9707	47.9697	80.5567	70.3691	211.243	164.851	174.788	91.335	42.1179	55.9587	144.569	88.7847	185.159
857	190.431	164.179	151.519	132.604	213.752	149.04	28.9544	29.2459	37.3067	105.543	129.668	126.061	213.01	168.465	163.547	33.8347	36.2131	29.6363	155.869	135.625	124.202	116.641	133.03	69.025	93.0728	173.539	156.504	199.783	192.809	187.882	153.41	105.496	173.31	127.45	88.3413	46.4298	81.0504	64.7825	210.074	164.993	174.969	91.8596	42.1022	54.8141	141.238	89.0271	185.752
858	188.36	162.897	151.965	131.229	217.073	144.75	27.0075	26.953	34.1761	104.752	131.803	131.49	213.683	168.254	165.402	32.9825	34.6167	27.5553	157.001	137.744	123.213	122.747	130.577	65.5153	96.5557	168.124	155.319	199.478	193.772	190.996	152.647	110.668	170.058	128.361	92.0673	45.741	85.6035	62.8908	209.507	161.893	174.715	91.463	40.8764	55.1731	138.561	90.7339	187.684
859	186.681	161.511	151.504	132.175	215.383	144.477	25.7956	24.3729	33.7736	106.042	136.477	132.318	213.524	165.891	165.482	33.7297	36.0708	26.6178	157.545	136.779	121.947	126.812	132.522	63.3177	98.9137	162.866	157.67	196.769	194.239	195.511	147.521	109.729	172.646	125.451	90.8496	45.1218	86.5479	61.7756	209.679	161.358	172.44	90.7745	40.0036	54.6066	137.924	92.0898	189.28
860	187.08	159.573	152.806	135.034	213.55	140.803	27.5223	22.8343	30.7991	105.573	141.79	132.87	212.431	167.633	165.941	32.4988	36.5145	24.4583	156.334	137.865	124.248	127.773	135.886	64.0932	96.3901	160.798	161.451	195.68	193.654	196.617	150.67	112.078	174.833	126.74	89.3767	43.2594	85.8307	60.2057	207.615	160.485	170.681	89.5188	38.6705	54.948	133.627	89.8793	189.134
861	186.23	159.826	152.601	139.248	213.784	138.142	25.55	21.4021	28.7383	105.143	147.493	128.319	213.593	167.752	166.872	29.9644	41.7932	25.9548	157.323	139.273	122.381	126.597	140.786	64.6536	91.565	158.541	159.706	195.635	197.774	196.805	146.649	113.174	177.138	128.166	88.0292	43.5113	83.1365	63.5323	206.42	158.653	169.714	89.4579	39.0599	55.2576	133.027	91.6972	190.697
862	185.856	157.885	154.158	143.365	214.501	137.835	23.1114	19.7933	28.5205	99.8553	151.908	124.09	213.579	168.881	165.421	26.9773	44.4864	27.1451	160.671	137.502	119.843	125.691	141.64	65.0832	92.287	156.935	159.926	191.96	196.879	195.837	146.67	115.158	176.468	126.54	86.1495	45.7478	83.5477	70.4392	205.661	158.796	166.753	88.227	39.3682	55.71	133.082	91.5542	193.103
863	183.702	157.489	152.39	143.289	214.432	136.935	22.8832	17.2011	33.056	97.6842	154.978	118.068	213.096	170.042	163.66	27.0308	46.7408	31.6086	161.743	134.896	119.054	125.221	143.966	65.5894	88.9816	155.318	158.405	190.978	196.375	194.542	147.829	115.837	178.107	127.614	84.3687	43.7593	83.5236	77.1685	209.136	159.142	162.878	87.5203	40.0602	55.9235	133.63	94.2564	195.35
864	182.926	158.633	152.829	141.734	216.277	137.924	22.0014	18.0781	36.2191	96.6382	159.916	116.475	213.147	169.786	164.883	26.1585	44.5092	34.3045	163.23	131.063	114.575	125.975	140.84	65.4325	90.549	154.715	156.482	189.515	197.831	193.318	147.035	114.664	180.449	126.595	83.8227	43.4235	81.6021	77.8217	208.127	155.005	162.76	86.2944	41.8407	56.6994	133.816	96.4328	197.257
865	185.607	157.864	153.33	136.854	214.224	141.491	21.6144	17.0823	34.0264	96.4207	163.856	114.422	214.847	169.764	165.005	26.5992	43.5413	37.752	162.947	128.444	112.043	124.288	140.149	64.9048	93.6289	156.473	153.005	187.024	196.844	192.008	152.077	114.57	180.812	124.87	81.4104	42.212	80.9018	80.5322	206.952	159.218	163.635	85.4293	42.4001	56.2823	132.904	97.1531	199.092
866	185.951	157.001	153.933	137.13	213.762	140.29	22.8571	17.1105	31.4656	94.1372	167.36	116.859	214.043	168.713	165.008	28.2645	43.0213	36.3379	162.511	126.654	111.688	123.311	141.706	66.4747	93.644	159.368	152.517	188.679	195.154	188.572	150.77	111.907	181.694	128.378	81.6696	37.5577	82.1734	82.3515	210.968	159.814	160.327	85.7356	41.0968	54.7428	133.947	99.5454	198.091
867	186.068	158.055	154.016	141.629	208.431	140.047	22.7066	18.8712	29.781	94.5571	167.618	116.705	214.918	167.794	167.031	28.4094	42	33.6869	158.966	128.473	113.307	128.538	144.202	70.1384	96.9825	160.245	153.593	189.845	192.634	188.638	152.794	114.637	182.751	128.181	83.2984	36.4033	80.3271	81.7193	210.592	157.586	161.462	88.6759	41.6611	54.0614	135.086	100.464	198.693
868	184.678	157.956	154.026	145.523	209.039	140.641	24.5244	17.6478	29.5195	91.6087	168.136	118.091	213.224	166.566	166.986	28.9798	39.7044	32.0761	156.371	127.756	115.741	131.247	144.904	73.5582	94.6924	162.814	157.378	186.356	191.318	188.974	152.142	113.903	183.187	129.623	84.2172	33.4159	77.411	79.7775	214.446	160.503	165.275	88.729	43.0591	54.9134	132.892	98.1104	196.429
869	185.074	159.75	155.642	147.614	209.445	141.398	26.5321	15.4056	30.4747	87.6166	171.229	122.484	213.529	165.724	165.756	30.6227	36.727	30.4812	151.442	126.09	121.034	131.044	146.911	77.0077	89.6749	167.675	158.631	189.174	191.227	187.661	157.253	113.444	183.249	129.866	86.5061	33.3556	76.6316	78.7834	215.177	161.928	168.284	87.8153	43.8926	56.5499	132.1	95.2131	195.856
870	185.245	158.951	156.266	147.486	207.825	141.697	32.6831	15.1642	32.4689	88.7834	172.024	125.799	210.924	166.216	165.028	34.6395	35.2383	28.2979	151.719	126.405	124.531	134.316	144.246	79.16	85.6176	170.055	158.578	192.456	192.43	190.258	157.282	112.992	183.625	128.737	87.4168	33.4893	77.0793	77.3087	215.118	161.253	172.046	88.996	42.802	56.4837	132.764	91.4299	195.066
871	186.222	159.152	154.705	144.458	205.849	139.225	36.4407	14.5924	32.2747	85.2476	171.354	129.608	209.322	167.546	162.275	37.4073	33.1018	31.7219	150.937	126.403	126.594	134.734	139.602	80.9665	79.4964	171.89	157.59	192.732	189.87	189.118	157.558	114.381	187.648	131.671	89.7867	35.4359	76.7563	74.7242	212.231	161.242	173.617	89.1685	42.3685	57.1128	134.794	91.1835	192.754
872	185.628	159.295	153.71	142.086	202.515	138.859	37.6088	17.6261	36.5461	85.9956	171.801	129.729	208.997	168.499	159.546	42.3953	33.0393	33.1566	152.261	132.007	129.697	137.162	138.184	84.8	76.8268	168.043	157.947	193.965	185.805	191.895	156.879	115.435	183.567	131.747	91.4507	36.6064	74.0408	76.9628	216.812	158.536	171.551	89.5225	42.2235	57.6718	139.319	89.5529	194.656
873	185.423	158.573	151.97	141.804	203.279	135.754	37.8932	19.1282	42.9605	88.6698	172.568	130.44	208.944	168.219	159.911	45.923	33.0177	33.5819	151.628	137.937	128.682	140.871	137.431	86.4089	74.9312	167.391	157.698	194.018	186.879	191.145	157.717	114.271	185.688	130.169	89.6069	35.2974	70.318	79.4807	217.517	158.178	170.667	87.3877	42.2515	58.911	139.112	87.9125	196.202
874	185.64	157.932	150.909	141.982	203.161	134.237	35.7634	25.2766	42.0552	94.7086	171.857	129.435	208.014	167.736	158.34	52.9567	37.0881	33.9015	151.414	143.288	130.944	146.314	139.44	85.057	70.5657	165.687	156.926	191.757	188.809	186.741	155.373	114.449	185.763	131.764	87.6876	35.3013	68.5475	79.2574	220.16	160.628	169.07	85.9153	40.9684	59.183	137.976	87.213	196.753
875	184.928	156.167	150.533	144.126	204.082	136.802	32.9667	28.6206	41.2856	96.036	167.677	128.505	205.872	168.443	161.69	58.4807	41.0448	32.9706	149.461	148.686	132.379	150.117	141.62	87.5518	67.8675	163.92	153.634	188.553	186.277	188.904	155.463	114.716	187.533	132.351	89.1333	37.3959	65.5071	80.1614	220.584	162.508	168.677	83.5253	40.4137	58.5675	137.064	87.4791	195.915
876	185.257	156.167	149.59	146.168	204.79	138.868	30.4631	33.7771	35.2316	93.0838	166.842	130.492	204.793	171.819	158.803	60.5836	45.0443	31.4958	148.282	152.475	131.23	152.518	146.293	86.9018	64.9252	167.473	150.341	188.023	186.864	187.528	157.686	116.491	191.219	133.956	90.3041	38.5345	64.8597	84.4952	220.692	162.542	167.437	84.0572	39.0572	58.1946	137.315	85.2625	196.001
877	185.502	157.458	149.693	147.5	204.237	142.585	29.5913	39.4293	33.6166	90.6806	165.68	135.331	205.598	173.162	161.395	59.9864	44.6927	28.8567	147.792	155.855	128.651	150.418	151.001	88.8347	64.1172	165.264	147.411	190.051	185.627	187.416	154.919	115.254	189.476	135.593	86.2332	41.6401	62.9446	82.4211	220.301	163.991	170.199	84.6645	39.0015	58.6786	140.173	84.3022	194.212
878	185.471	157.234	150.36	152.148	202.956	145.054	28.4493	44.4813	30.5035	92.4798	165.414	138.931	206.079	173.384	162.42	57.3901	45.1719	28.1133	146.788	159.159	123.466	147.798	150.532	85.9721	67.98	163.841	147.836	192.261	189.126	186.531	161.278	115.918	191.753	135.88	84.1789	41.914	58.4203	82.3901	219.678	168.817	171.256	83.9214	37.3516	58.573	140.511	78.9858	193.251
879	185.661	158.68	148.204	155.484	202.621	147.828	24.9846	45.4816	27.3771	95.2248	163.143	138.976	207.766	174.781	161.959	53.2883	44.2325	27.8408	143.139	160.013	120.076	147.733	154.482	84.64	74.685	163.797	150.586	193.903	188.843	184.91	162.111	116.066	191.492	135.676	82.4922	44.0331	55.6435	81.4367	217.986	170.969	169.138	86.2969	38.6739	57.9756	138.702	72.9417	192.681
880	184.728	160.233	150.666	155.371	201.911	149.738	22.8762	42.7309	27.3593	93.6963	156.549	141.072	206.905	174.064	162.961	48.9582	43.4855	26.5859	144.021	161.803	117.162	148.396	158.22	84.8709	83.6173	167.866	153.753	193.363	192.83	183.401	161.321	118.743	190.972	134.17	81.5012	43.9412	51.1401	77.0674	218.159	171.474	168.329	85.7784	38.5471	56.9918	141.226	69.4356	195.161
881	185.981	161.546	150.036	155.779	201.259	154.407	23.3649	39.8261	25.9945	90.8219	157.597	143.335	207.614	173.39	162.041	44.5312	42.9361	24.5586	145.104	162.632	112.593	147.847	158.06	83.8552	90.8619	167.452	158.709	192.768	193.084	183.984	161.074	121.262	190.2	133.885	81.5672	49.183	51.5627	78.8656	215.753	171.258	168.242	85.5933	38.7792	58.7071	140.139	70.7505	199.201
882	185.805	161	150.541	157.547	201.653	154.366	26.3633	35.5223	23.0863	88.223	153.908	144.901	208.385	172.181	160.994	43.3495	39.6662	25.4572	148.414	161.783	112.934	146.264	159.601	81.8034	94.2769	167.381	163.646	191.692	194.831	184.257	157.443	121.652	189.492	132.579	82.9317	46.5936	54.0829	78.7531	212.529	170.22	167.822	84.9958	39.3841	60.2121	138.288	70.6857	202.873
883	186.348	161.475	151.067	161.377	205.457	151.998	26.7854	31.1862	20.601	85.8682	153.868	147.032	207.383	171.698	161.058	39.9125	38.5577	28.0873	152.052	158.629	107.993	145.095	160.104	78.4739	96.4921	166.721	164.512	194.123	196.878	182.791	158.591	123.058	187.87	133.381	83.9726	42.477	52.8876	79.2964	212.444	172.792	169.235	85.463	38.839	60.2962	140.029	71.4515	204.965
884	185.536	160.16	152.921	163.974	208.379	143.182	31.0136	31.8669	22.6668	82.6744	152.49	147.481	207.422	171.09	158.161	38.394	36.0299	30.2321	153.602	154.984	104.123	144.948	157.435	77.9904	97.0115	166.744	163.011	192.805	197.149	181.309	157.942	121.594	186.47	133.856	83.4849	42.2131	47.2931	75.152	210.487	174.181	167.859	84.7677	37.6615	59.3406	143.312	69.5776	206.065
885	186.771	161.527	153.587	166.084	209.606	139.291	32.5003	28.9636	23.9285	80.045	146.438	152.714	207.235	171.315	156.335	37.9957	36.8565	29.8842	153.079	151.367	102.489	144.48	154.698	83.0413	96.1379	165.749	159.211	194.316	195.909	181.162	155.516	120.684	187.442	136.046	84.1433	42.5264	49.1948	69.2567	208.83	173.651	164.654	84.0994	37.2376	58.9923	144.593	72.1441	207.144
886	186.894	161.422	151.452	168.8	210.645	136.475	31.4189	26.3477	22.0206	76.518	145.098	158.301	208.18	171.059	153.187	36.1632	41.7039	32.3726	154.155	146.371	105.154	139.278	153.039	88.5895	96.6984	162.268	157.658	189.286	193.189	180.485	155.685	118.932	186.327	136.917	83.7284	44.7591	48.4839	64.5812	206.486	177.018	163.25	86.0647	37.281	57.9435	145.449	72.6906	209.096
887	186.115	162.484	152.576	170.885	210.129	138.065	30.9403	23.3183	19.6599	75.2369	145.688	160.4	208.101	170.971	152.82	34.2467	45.3838	33.2054	153.751	144.205	107.063	133.188	149.545	91.9597	99.1848	157.735	156.14	186.646	192.202	178.995	160.701	118.128	186.016	135.132	86.2938	50.379	48.4504	59.5827	207.124	175.41	160.414	86.3981	36.5739	57.0173	141.265	75.086	209.132
888	186.544	161.315	153.483	169.787	206.741	135.689	32.5686	22.0491	18.1278	72.658	147.103	160.217	209.077	171.045	150.415	33.5678	47.4678	32.9142	155.283	143.142	107.207	128.871	148.684	91.7638	99.6055	154.026	152.72	185.294	189.376	178.538	156.807	118.44	186.348	135.09	87.1368	51.632	50.6991	55.4011	205.101	175.955	158.415	85.8247	36.8827	56.4075	140.159	74.7667	208.59
889	187.231	162.65	154.02	170.504	210.229	135.629	34.1739	19.3104	15.3121	71.5501	146.939	162.59	208.774	172.874	148.226	35.8652	48.2968	35.7454	153.261	142.392	110.746	125.236	144.201	92.7721	96.9632	155.112	154.89	189.077	187.992	183.199	156.067	119.839	184.996	134.183	86.7738	54.1504	57.2612	57.1345	204.454	174.508	154.57	86.7998	37.45	55.4988	139.258	74.7198	206.514
890	186.654	162.245	155.344	172.538	209.173	135.23	37.0306	14.4324	14.6922	72.6378	150.44	162.108	209.195	173.592	145.449	39.0124	47.8064	37.9268	148.975	144.413	110.766	123.054	145.51	90.2356	95.3958	155.726	154.8	189.498	186.964	184.115	156.899	115.291	184.599	135.839	85.9511	52.2503	64.2679	55.5469	203.9	173.051	155.948	87.185	37.3777	54.5236	140.093	74.7343	204.018
891	186.006	164.581	154.564	172.948	207.728	136.586	38.8392	16.9661	13.0935	74.7676	153.805	158.261	209.319	175.463	143.99	40.3833	46.5004	36.0213	146.699	147.556	107.873	121.055	143.898	86.8542	96.5368	160.945	156.531	191.288	185.589	184.764	152.614	116.039	187.108	136.115	87.2557	52.7848	69.1069	53.556	203.882	171.924	153.16	88.3065	38.1217	54.315	143.569	73.5207	202.459
892	186.629	165.542	154.77	174.681	206.392	132.768	40.8444	17.9452	11.544	77.4637	157.002	155.626	207.359	174.665	144.124	42.0759	45.0268	34.8797	144.861	152.264	107.065	124.546	142.376	85.9047	98.7074	160.285	157.182	191.3	181.761	188.565	150.502	116.179	184.799	136.673	85.3888	53.5133	75.2156	51.5842	203.819	170.658	151.436	87.092	37.6317	53.988	146.25	68.0652	201.015
893	184.201	166.193	155.545	174.868	206.408	132.06	39.5609	18.5285	14.5676	75.4124	157.564	154.706	208.727	174.654	145.588	41.4615	42.4274	34.2419	143.925	156.494	110.798	127.004	144.152	87.9269	98.0572	157.839	157.157	191.717	181.796	192.125	152.459	115.278	183.63	135.684	87.563	49.232	82.0381	51.9032	205.88	172.253	155.2	85.8221	37.1605	54.7427	151.714	65.0896	199.253
894	184.243	163.988	156.035	174.072	206.716	133.266	44.431	18.1386	14.7572	78.2119	155.824	150.421	209.466	173.591	144.85	40.7636	41.2858	31.6002	147.751	157.461	115.307	129.625	143.314	91.519	98.3966	158.27	154.089	188.86	178.161	191.572	155.428	116.769	184.204	134.628	88.5906	48.2121	85.852	51.9682	205.926	172.177	155.056	84.6161	36.2103	56.5933	157.299	63.9315	198.158
895	183.127	165.351	156.085	174.058	206.408	132.732	47.3322	18.5055	18.2566	81.1546	153.428	150.706	208.651	173.305	144.532	40.9993	41.1361	30.0442	148.132	157.315	119.213	130.729	143.318	91.7768	102.544	159.55	153.226	192.344	178.369	190.721	156	115.007	186.261	133.396	87.844	46.6144	88.2872	50.9159	207.078	171.502	158.383	84.6397	37.2173	56.0806	159.769	66.1398	197.845
896	183.936	166.656	156.248	174.404	206.895	132.573	50.4874	18.624	21.0323	80.4933	152.611	152.237	207.613	173.613	143.312	39.6695	40.4961	27.2809	148.785	153.524	121.26	128.83	137.626	90.1129	106.282	163.298	153.567	190.792	173.109	186.72	154.516	117.162	186.639	133.058	85.5053	45.7126	90.1353	53.233	206.762	172.539	154.602	83.1979	38.4774	56.2808	160.67	66.7143	197.722
897	183.711	166.285	154.838	177.069	205.592	132.171	47.6811	19.1819	26.3041	86.6427	152.195	155.362	207.423	174.982	141.617	40.7295	38.2707	24.26	149.836	151.78	124.245	122.574	135.105	86.7228	107.374	162.453	156.103	192.19	176.036	186.689	156.432	115.66	188.511	133.262	84.5556	44.7801	96.1051	54.0624	206.99	173.485	152.856	82.5922	38.4594	56.2208	159.3	68.2776	196.763
898	183.832	167.244	153.447	176.102	202.93	132.224	44.9926	17.9859	29.8549	96.3096	153.985	159.675	206.881	175.328	141.646	44.4481	35.894	24.1536	150.808	152.869	129.244	118.74	133.733	87.1087	108.885	162.849	159.094	192.487	172.429	186.194	157.998	118.499	188.36	130.797	82.5498	44.704	99.0165	51.5072	204.577	174.033	150.112	80.8893	37.5152	56.5072	161.311	70.9462	195.083
899	184.4	167.396	152.794	174.015	201.052	135.028	41.1723	20.0949	30.2444	99.538	154.448	167.163	209.522	176.13	143.829	49.8738	37.3775	25.4204	154.161	153.598	134.65	113.781	136.615	89.8601	107.126	164.06	159.797	191.409	172.876	186.7	160.671	115.559	188.999	131.849	83.7328	46.8911	107.657	54.6688	204.393	176.489	149.33	79.7367	38.2207	55.2459	161.788	73.7362	192.526
900	183.691	166.969	152.578	172.962	197.429	137.832	38.3479	19.3439	30.8407	103.784	154.41	167.119	210.712	174.824	143.417	55.064	40.8018	27.8761	155.459	152.775	139.94	109.016	137.713	91.1559	106.534	168.933	160.212	191.043	173.389	184.25	161.82	115.756	187.86	131.499	80.1324	48.2314	110.865	56.1526	207.541	175.72	149.9	78.2448	37.3263	53.5319	158.523	76.1305	191.883

## Sheet: Fig 1B ASH GCaMP3
Source Data	Figure 1B	ASH GCaMP3 Data: Individual dF/F(%) traces
		Three trials per animal: Read from left to right; Trial 1 signifies a new animal
		Acquisition Rate: 5 Frames/sec
		Pulse 1		Pulse 2		Pulse 3
		Stimulus On:	Frame 150	Stimulus On:	Frame 300	Stimulus On:	Frame 450
		Stimulus OFF:	Frame 200	Stimulus OFF:	Frame 350	Stimulus OFF:	Frame 500
Frame / Trial #	Trial 1	Trial 2	Trial 3	Trial 1	Trial 2	Trial 3	Trial 1	Trial 2	Trial 3	Trial 1	Trial 2	Trial 3	Trial 1	Trial 2	Trial 3	Trial 1	Trial 2	Trial 3	Trial 1	Trial 2	Trial 3	Trial 1	Trial 2	Trial 3	Trial 1	Trial 2	Trial 3	Trial 1	Trial 2	Trial 3	Trial 1	Trial 2	Trial 3	Trial 1	Trial 2	Trial 3	Trial 1	Trial 2	Trial 3
1	-1.64355	-1.40541	-4.17193	9.55772	-7.51486	-9.71875	-6.29147	-11.9538	-11.1836	-22.3347	-9.05067	-14.0271	-2.32909	-7.60891	-12.3073	-11.3302	13.4951	-2.84458	-1.75716	-11.1384	-11.2591	54.9204	-16.0159	-12.0378	-2.12285	-2.04515	-8.09179	-2.09004	-11.5929	-8.05133	3.63662	-6.23981	-12.8332	-12.0166	-12.3784	-11.3715	-7.55766	-13.6628	-11.7235
2	-0.680364	-0.696473	-3.97743	9.49967	-7.33007	-9.19618	-4.2548	-10.364	-10.3103	-18.7921	1.45279	-13.4552	-2.56696	-1.95102	-12.4969	-9.77279	14.2693	-2.26205	1.82357	-10.611	-6.83833	62.6011	-5.78798	-9.33228	-2.03413	1.67477	-4.86036	0.315463	-5.99934	-7.81432	9.28273	1.87648	-13.7688	-11.9478	-10.1315	-7.82363	-10.3975	-7.69257	-6.98453
3	-1.28065	-1.09777	-5.01738	9.21014	-6.58014	-9.9242	-3.58196	-10.3941	-9.70655	-19.7751	-0.670444	-4.10577	-2.09393	-6.98448	-9.93106	-10.1596	13.5272	-2.83272	1.63417	-6.79459	-6.52249	66.3382	-6.65744	-4.88232	0.816418	1.243	-5.08431	2.37545	-10.4228	-1.52805	6.66074	0.795859	0.968905	-13.3117	-10.2023	-7.52455	-12.8769	-8.12259	-8.29393
4	-0.830224	-1.4515	-4.07521	8.85929	-6.59545	-9.33796	-5.87875	-9.64051	-10.3991	-19.093	-0.274062	-3.18137	-3.14094	-6.34553	-9.50782	-10.6871	13.3241	-3.05995	0.21002	-6.87955	-10.7631	57.9139	-5.50933	-7.03772	1.25187	-2.61356	-5.26706	-0.354321	-10.141	-1.09706	9.02977	0.848211	0.643079	-15.6212	-9.74849	-6.86291	-13.2885	-8.07094	-8.58802
5	-1.35817	-1.13101	-4.15877	7.97625	-6.7027	-9.85382	-5.06689	-10.4929	-9.30838	-19.9986	-0.057472	-4.57469	1.07942	-1.51926	-8.96602	-9.98052	12.5368	-2.53936	0.40061	-6.99576	-7.00263	52.9552	-6.36299	-5.58228	0.380685	1.03033	-5.00619	-0.46892	-5.78047	0.416201	6.04409	-1.66309	-11.4597	-15.2737	-10.1859	-7.86601	-13.3706	-7.15197	-7.36436
6	-0.869293	-1.20955	-4.76777	7.74653	-5.92	-9.6124	-5.13975	-8.97893	-8.25868	-18.5767	-0.82872	-1.70772	-3.48718	-6.22112	-9.37584	-11.3294	12.1745	-3.0429	-0.0223786	-6.56274	-10.2286	47.1459	-3.92589	-6.07998	-0.0823537	0.524522	-4.98312	-0.379303	-9.25484	-7.60878	9.26667	1.45849	-13.4411	-17.1	-10.0153	-7.06624	-10.3038	-8.14456	-7.41722
7	-1.89987	-1.061	-4.91007	7.97093	-6.51782	-9.43906	-4.25323	-9.38937	-10.4382	-18.7642	-2.2325	-3.72133	0.187248	-2.928	-8.86957	-10.1009	11.91	-2.74869	0.338077	-11.1877	-6.88905	42.7102	-6.72545	-6.09767	0.313499	1.15726	-5.30821	1.39622	-8.47583	-1.91433	3.61732	-1.22656	-11.2722	-17.9618	-9.67343	-7.13821	-10.5911	-7.06529	-6.77881
8	-2.53339	-1.30285	-3.98268	7.10119	-6.20887	-9.49943	-5.07478	-8.72441	-8.8679	-17.8475	0.697924	-2.64742	-0.355338	-8.2486	-8.77345	-11.2481	11.3196	-2.5584	-0.00915644	-5.72092	-6.12458	40.5064	-4.76557	-2.81784	1.0276	0.322725	-4.82954	-1.53641	-4.67217	-0.561681	0.775694	-0.265754	-2.9734	-16.8408	-9.3546	-7.56364	-12.3791	-7.98918	-7.36289
9	-1.76264	-1.44623	-5.28442	8.17381	-6.86238	-8.46651	-5.59661	-9.24845	-10.6616	-19.6531	-1.3847	-2.971	0.949204	-3.48726	-8.96127	-9.81811	10.9822	-2.95022	-0.663269	-10.6119	-10.2857	35.8871	-3.40915	-2.22125	-2.58178	0.354116	-4.3806	-2.27466	-9.67873	0.331788	-5.98012	0.762015	-2.23738	-16.7564	-9.66763	-7.79878	-11.6336	-8.67559	-7.10251
10	-1.75801	-2.26496	-4.47181	7.34864	-6.88389	-9.97627	-4.09253	-10.2054	-8.14553	-20.4982	1.30059	-2.50506	0.597077	-7.64264	-9.20023	-9.47384	11.8352	-2.98584	-1.08446	-8.15142	-10.3096	41.5837	-4.51474	-5.97206	-0.0545753	0.585719	-4.59325	0.481088	-9.87533	-1.2034	-6.00618	1.06693	0.617845	-16.9861	-9.17823	-7.21591	-10.476	-8.14447	-4.80842
11	-1.88837	-1.94725	-4.79558	8.12957	-6.63695	-9.8237	-4.0789	-8.71292	-9.74921	-20.6767	0.151009	-4.17298	-1.65947	-2.37425	-8.18871	-11.0108	11.0475	-3.65686	-0.984048	-7.14182	-10.2565	42.1306	-3.41578	-6.40611	-0.335835	0.817157	-4.72081	-0.726793	-10.0625	-1.07839	-3.10416	0.701297	1.10567	-17.7496	-10.0241	-6.53169	-10.3894	-5.96684	-6.11962
12	-1.16055	-1.42465	-3.92793	7.20706	-6.66934	-9.14403	-3.94972	-9.70858	-9.49853	-19.268	0.67545	-1.74712	-0.61338	-6.89733	-8.56545	-10.3081	10.4983	-2.95984	0.129828	-10.9227	-10.9787	37.4962	-6.06552	-12.4079	0.451509	0.446748	-5.55668	-1.40301	-3.90366	-0.97622	-3.5918	1.7174	-0.347362	-17.5602	-9.83459	-7.23756	-8.2797	-7.14205	-6.01081
13	-1.43772	-1.20702	-5.30151	7.80242	-5.79394	-9.87221	-4.58441	-10.4249	-9.94594	-18.0623	1.52186	-2.75297	-0.523952	-2.12489	-8.96465	-10.71	10.4604	-2.68707	0.486666	-7.27385	-9.74735	34.2746	-4.39948	-4.07398	-0.0913854	0.0464358	-5.06531	-2.45913	-3.10645	-0.573354	-5.58847	-0.357679	-12.3446	-18.2509	-9.16533	-6.84808	-9.78644	-7.55989	-5.03895
14	-1.55699	-2.10727	-3.64915	6.76729	-6.16239	-9.45331	-4.55276	-8.50154	-9.40688	-19.3096	0.0124563	-2.24001	-1.21959	-3.57766	-10.0219	-9.20621	10.993	-3.47348	-0.725593	-5.56882	-11.0817	32.5586	-3.0595	-3.33499	0.184201	-0.314567	-5.2597	-2.26294	-3.7042	-0.335747	-5.99227	0.00772981	-10.8533	-20.0423	-9.13795	-7.13235	-7.61433	-6.27304	-5.75151
15	-1.45033	-1.51025	-4.60927	7.35229	-5.79128	-9.49869	-5.48219	-10.1171	-10.1398	-18.3912	-0.547255	-0.534337	-1.55502	-1.88809	-9.88325	-10.4118	10.8031	-3.65346	-0.384738	-6.77877	-10.6901	27.342	-2.45023	-4.11999	0.738666	0.288517	-4.8766	-0.872268	-8.92675	0.065802	-7.73987	0.0337407	-12.7957	-19.227	-9.25561	-6.64637	-6.33613	-5.77294	-6.42058
16	-2.28153	-2.37045	-3.96859	7.6055	-5.81814	-9.11395	-4.38115	-8.42373	-8.25875	-20.6127	-0.0971632	-12.9726	-0.728339	-7.52918	-9.08934	-10.2905	11.2374	-3.09009	-0.509958	-5.6794	-10.3946	28.9362	-4.63891	-3.07422	0.124828	-0.254107	-4.95131	0.594163	-2.90494	-1.06121	-7.80817	-0.0708995	-0.150359	-18.8597	-9.27533	-7.4189	-6.28121	-6.89362	-6.47217
17	-1.3616	-2.02789	-3.78321	6.59617	-5.96428	-9.28094	-5.41544	-9.23308	-8.86479	-19.4924	0.797682	-2.74244	-2.10101	-7.87626	-8.98326	-10.1843	11.1957	-3.32074	0.257961	-5.88467	-10.3361	25.9387	-5.19786	-4.40587	-0.166025	-1.06745	-4.57673	0.761133	-4.75495	-6.94882	-8.8132	0.853564	-1.87544	-17.409	-9.03693	-6.59656	-5.18823	-7.20972	-6.41162
18	-1.67017	-1.72699	-3.41326	5.82975	-7.02692	-9.54473	-4.4167	-9.38238	-8.55439	-20.7162	0.952738	-2.82299	0.206721	-7.55938	-8.75968	-9.94506	10.528	-3.83414	-0.162829	-10.4437	-5.8724	25.0552	-4.4785	-2.13217	0.375533	-0.383512	-4.99611	1.0836	-4.12603	0.0403122	-9.3718	1.07669	-0.650269	-16.859	-9.04077	-6.78748	-5.03181	-8.09938	-6.62398
19	-1.92655	-2.86594	-4.4598	6.02843	-5.78874	-9.4202	-4.17779	-8.81849	-9.1864	-20.1564	-0.12249	-2.01908	-2.08199	-7.37627	-8.82667	-8.82491	10.1874	-3.83196	-0.587923	-5.87991	-6.72569	27.0648	-4.21985	-3.31835	0.1402	-0.264698	-3.93785	1.75726	-4.72598	0.4131	-8.97398	0.662226	1.3094	-16.6637	-11.8163	-6.99902	-4.35726	-7.81095	-6.03085
20	-2.19042	-2.47043	-4.5866	5.23944	-6.16059	-9.17094	-3.37444	-9.42865	-8.29358	-22.7234	2.68627	-1.89913	-1.7125	-7.17724	-8.06712	-8.59232	10.5105	-3.52311	0.281235	-5.76302	-10.3283	23.9998	-4.31653	-2.31249	-0.0544386	-1.19384	-4.08739	-2.46604	-8.85657	-7.10373	-8.95345	1.51211	-0.927233	-15.9996	-9.18058	-6.47647	-3.71003	-5.47463	-4.46694
21	-1.93479	-2.41286	-4.87267	4.76203	-5.84694	-8.40077	-4.88906	-8.63635	-9.52703	-23.4678	0.0605014	-11.3499	-1.29359	-7.72591	-8.40633	-9.67772	9.90969	-3.88781	-0.640261	-10.871	-9.23368	20.4623	-5.50416	-10.8763	-0.112051	-1.67186	-3.98258	1.58338	-3.39894	-1.03361	-9.37582	-0.282958	-13.4536	-16.0035	-8.48651	-5.93918	-3.86882	-7.59537	-4.31181
22	-1.34762	-1.71602	-4.1359	4.77934	-6.61019	-8.87393	-5.48098	-9.91101	-8.67736	-25.1846	1.72541	-2.14649	0.168891	-6.54446	-11.8882	-8.50049	9.34681	-3.356	0.275429	-10.0943	-9.0673	18.8467	-3.11966	-4.89367	-1.01072	-0.816048	-4.26149	0.844321	-8.97264	1.97373	-8.18365	-0.871038	0.932195	-15.5049	-7.60292	-6.19082	-4.54375	-8.42018	-6.04143
23	-1.86546	-3.12084	-4.10223	5.15672	-6.1196	-8.79497	-4.11696	-8.23718	-9.06367	-26.3261	0.0248852	-12.6476	-0.383845	-3.67102	-11.4556	-9.8297	9.69543	-3.67935	0.15079	-10.0565	-9.01064	18.2614	-4.92029	-10.9003	-0.146417	-1.28898	-4.61445	1.44068	-8.97228	-0.356712	-8.33318	1.99833	-10.9817	-16.1922	-7.66569	-5.88709	-4.90716	-7.58808	-5.09567
24	-2.07508	-2.41778	-4.76139	4.82668	-5.5372	-8.76561	-4.89825	-9.30104	-8.1865	-22.1159	2.39397	-13.1101	-0.21533	-7.20356	-7.90908	-9.70033	10.2752	-3.3815	-0.481751	-9.91576	-10.102	17.4049	-4.15316	-2.38706	-0.0662039	-1.29755	-4.15608	-0.368399	-8.25406	-6.24615	-9.37225	-0.930563	-10.6535	-16.9666	-8.73755	-6.11332	-1.6439	-5.86367	-5.1729
25	-2.13565	-2.38717	-4.62725	4.30228	-5.36183	-8.23312	-4.50246	-9.47844	-7.38588	-22.8039	1.06435	-12.2104	-0.667211	-7.05072	-9.06329	-9.81572	8.36253	-3.47733	-0.449719	-9.86751	-8.26671	17.2311	-4.37667	-3.51233	-0.321567	-2.16316	-3.69274	-1.35001	-8.47708	-6.42916	-9.48431	0.808229	-8.71389	-16.2026	-8.67781	-6.17892	-3.24622	-6.22826	-5.3065
26	-1.49935	-2.31764	-4.33578	4.83505	-5.78274	-8.93541	-4.80898	-8.51879	-7.51453	-22.8556	-0.677453	-2.42983	-1.41828	-7.61307	-8.96133	-9.6506	8.2784	-3.89307	-1.25396	-10.581	-8.62028	15.1366	-3.61037	-10.9586	0.237682	-1.84412	-3.46275	-0.470525	-8.06775	1.5998	-8.44189	0.789643	-8.76591	-16.3847	-11.7892	-5.73962	-4.68697	-6.83106	-7.89256
27	-1.60293	-2.56003	-4.19237	4.52322	-6.13963	-8.33015	-4.0423	-9.50641	-7.65606	-22.9592	1.53278	-1.20702	-1.53758	-6.41435	-8.50219	-9.23714	8.19916	-3.53246	-0.161896	-9.58044	-9.64779	13.7839	-2.43254	-12.1078	0.217847	-1.17467	-3.07058	-0.769026	-4.04088	0.140742	-10.1319	1.41026	-8.11622	-17.1764	-7.98198	-6.65942	-1.91991	-7.2245	-4.07646
28	-1.00087	-2.75643	-4.21254	5.26631	-6.02344	-8.40402	-4.60558	-9.24382	-7.5522	-23.0417	2.65824	-2.34242	-0.524304	-2.12748	-8.14683	-9.32062	7.894	-3.40451	-0.0821519	-9.91566	-8.07656	22.2812	-12.5767	-1.56131	-1.27028	-1.31006	-3.064	-0.958786	-8.66651	1.39844	-9.01724	2.12793	-8.96197	-15.7942	-8.85176	-6.34857	-0.475679	-6.52731	-4.44686
29	-1.66001	-1.58913	-4.659	4.48152	-6.42086	-8.9689	-4.00896	-9.17053	-8.02209	-24.5898	-0.0784178	-2.59372	-1.5142	-7.02125	-11.075	-8.19607	7.58835	-3.82293	-0.338931	-9.36435	-7.80162	21.4467	-3.96548	-3.10982	-2.46209	-1.28041	-3.34201	0.759081	-7.94552	-0.29679	-5.94872	1.23698	-10.8152	-15.7875	-7.44657	-5.73394	-2.34061	-12.1479	-4.08493
30	-1.80081	-2.79962	-4.75637	4.13492	-6.52293	-8.06613	-4.8785	-9.4031	-7.13836	-26.2575	1.81331	-12.2027	-1.20258	-5.45412	-10.6922	-8.98536	7.51966	-4.05139	1.11194	-9.94916	-8.37484	18.881	-3.87531	-3.04666	-0.183342	-1.52578	-3.6684	-2.89565	-1.17845	-6.56375	-4.30457	1.41502	-9.24443	-17.2526	-7.47001	-5.62216	-0.799292	-12.2335	-4.36813
31	-1.38546	-2.43227	-4.83387	3.47977	-6.28262	-7.983	-5.69767	-9.34022	-7.52955	-24.4247	1.55536	-11.693	-0.353036	-1.47864	-6.99509	-8.79034	7.57606	-4.08076	-0.660423	-9.73406	-9.75483	13.9581	-10.9176	-8.76305	-0.551265	-1.92669	-2.99825	-2.71226	-8.503	-6.76359	0.152682	2.66739	-8.69677	-18.1244	-8.35301	-5.19443	0.463155	-5.71353	-3.11947
32	-2.04093	-2.33981	-4.28459	2.91525	-6.4717	-8.49047	-4.00131	-8.57431	-8.04926	-24.6445	-7.72236	-10.7716	-0.22665	-7.16295	-10.9514	-8.71789	9.18383	-3.44155	-0.0110131	-9.38106	-9.48305	12.6165	-4.13204	-1.04638	-0.607379	-1.45563	-3.79988	-2.4977	-2.48057	-1.0052	-1.69901	3.34606	-10.9451	-16.6964	-10.187	-5.6159	2.93573	-5.63902	-4.55596
33	-1.10234	-1.89371	-2.95236	2.65915	-6.02723	-7.79731	-4.0151	-7.98999	-6.94553	-23.2174	1.57922	-10.63	-1.0015	-2.48338	-9.64097	-8.21581	7.13086	-3.21487	-0.749953	-8.19305	-9.18628	14.4238	-2.20903	-10.4132	-0.499167	-2.30527	-3.50343	-0.689421	-0.928739	-5.18235	-2.4076	2.95599	-8.83541	-15.9305	-10.4911	-4.87409	1.31461	-6.08241	-5.29274
34	-1.61092	-2.70948	-3.34017	3.09371	-6.17582	-8.49722	-4.23744	-8.45472	-8.3597	-20.5514	0.419047	-1.52834	-0.72749	-6.1386	-10.4435	-8.5608	7.30406	-3.23116	-0.0690249	-9.20351	-8.7448	11.8841	-0.296881	-0.646113	0.326931	-3.23801	-3.41583	-2.44192	-8.47297	-5.80891	-2.52128	2.25599	-9.66794	-17.2612	-7.26237	-5.75511	2.12951	-11.7166	-7.62869
35	-1.57386	-2.21644	-4.67613	2.63253	-5.87895	-8.14582	-3.99672	-7.95639	-8.24199	-24.3792	2.651	-11.3678	-2.20806	-6.31571	-10.4776	-8.31809	6.69218	-3.53285	-0.398466	-8.92258	-8.423	10.1287	-1.90985	-10.8611	0.059225	-2.31234	-3.75151	-1.0517	-9.26611	-6.31211	-3.24719	1.86986	-8.88693	-16.5553	-7.79342	-6.01599	5.25416	-4.45528	-7.10775
36	-0.863455	-2.13679	-4.43177	2.57512	-5.79654	-7.95105	-4.36876	-7.22574	-7.38498	-22.9311	2.50031	0.996121	-1.62575	-5.84586	-9.97544	-8.29723	7.9579	-3.40029	0.230754	-8.08985	-7.36599	8.8284	-11.8687	-3.70241	-0.751034	-1.66515	-3.0242	-0.72049	-7.96284	1.01413	-2.93224	3.023	-8.9342	-16.7188	-6.79343	-5.17166	7.96662	-5.25287	-4.09322
37	-1.29099	-2.33018	-4.5895	2.54833	-5.54709	-7.9557	-5.06332	-9.20695	-7.70737	-21.8387	1.40992	-0.10028	-1.82293	-7.31503	-9.78667	-8.53109	7.68131	-3.36077	-1.11675	-8.8304	-7.75229	7.01113	-4.09664	-9.59207	-0.14404	-1.32951	-2.89964	0.220643	-7.08559	-0.966852	-2.65549	3.24924	-10.3414	-17.4594	-9.80876	-4.93256	7.53177	-10.8846	-9.22826
38	-1.36951	-2.69049	-3.94755	3.28747	-5.48279	-8.03876	-4.19066	-7.73899	-6.87567	-20.9183	-7.25686	-11.5855	-0.124273	-6.28717	-8.97535	-8.14503	7.51248	-2.98165	-0.468301	-8.51237	-7.01882	7.73787	-10.5699	-1.35902	-0.504866	-2.45868	-3.42632	-2.00923	-8.74887	-5.73678	-2.97664	1.86849	-11.6774	-16.5761	-9.59495	-4.80201	8.49969	-10.377	-3.62731
39	-1.99379	-2.36651	-4.8804	2.17568	-6.10673	-8.18053	-4.92243	-8.16943	-5.5236	-18.8052	1.84608	-11.9307	-0.812305	-7.15124	-10.5365	-7.94725	6.9304	-3.31011	-0.828366	-8.81427	-7.16529	6.25731	-10.3361	0.89629	-1.00416	-2.00044	-3.08481	-0.0376843	-7.70772	0.088849	-0.914212	1.68076	-6.1423	-15.9432	-6.6768	-7.68311	5.60789	-8.54293	-2.77214
40	-0.767989	-1.81965	-4.23531	2.55595	-5.97851	-7.56137	-2.62966	-7.91648	-6.63391	-18.2566	3.00091	-11.8403	0.251596	-6.23338	-8.53647	-7.71238	6.76295	-3.51191	-1.08905	-8.15715	-8.87465	5.55115	-1.03952	-10.6631	-0.94	-2.70589	-2.91671	-0.700793	-7.26922	0.763998	-0.684271	2.78506	-9.91567	-14.1663	-5.97379	-5.10644	5.15917	-2.63601	-5.03526
41	-1.98594	-1.73507	-3.09618	3.16324	-4.99981	-7.43942	-3.60686	-7.88321	-7.89058	-20.1842	-0.258577	-9.55547	-1.6126	-6.29208	-9.15112	-7.44783	6.77553	-3.2665	0.310165	-8.8802	-7.83829	6.09765	0.48846	-2.47421	-0.715002	-2.46805	-5.78412	-1.53964	-6.26047	-6.12804	-1.43554	0.394315	-8.26345	-12.7758	-6.87362	-5.18263	3.65262	-9.48916	-3.87873
42	-1.26451	-0.584413	-3.97271	2.95738	-5.40869	-6.99025	-3.99595	-7.25431	-7.38139	-16.3227	3.62226	-11.1762	-1.35943	-1.50802	-7.83847	-8.0265	6.31716	-3.19574	-0.560554	-7.80883	-8.03601	6.68554	-0.535481	-9.13553	-0.294919	-3.24983	-3.57076	-0.845302	-7.43903	0.202406	-1.29702	1.09663	-8.00484	-11.1028	-6.14364	-5.30485	5.11836	-9.56233	-8.74433
43	-1.72967	-1.80454	-4.10012	2.84811	-5.2365	-7.26146	-2.68951	-7.67689	-5.80046	-18.9442	2.58923	-10.9284	-0.654193	-5.82207	-9.17502	-7.47762	6.48161	-3.17129	0.0447909	-7.84581	-7.84457	7.37159	-11.0357	-2.99654	-0.862379	-2.19386	-2.35858	-0.903783	-5.74414	-0.0190577	-1.0828	2.12419	-9.29314	-12.5847	-8.41942	-4.95016	3.3097	-9.70854	-7.96827
44	-0.547183	-1.6888	-3.60457	3.91054	-5.21246	-7.67553	-3.92594	-7.72347	-7.00883	-18.5154	1.97542	-9.71698	-0.896831	-5.2814	-8.76399	-7.07661	5.99532	-3.34103	-0.330687	-8.44127	-8.03624	8.00653	-0.555042	-9.35443	-0.979086	-2.40585	-2.617	-1.62001	-7.05443	1.53117	-1.45818	0.308417	-8.16466	-12.9861	-9.73462	-8.37398	3.05466	-9.41719	-8.61781
45	-1.17714	-2.08243	-3.63202	2.78004	-5.48693	-7.01082	-5.24501	-6.52475	-7.80923	-13.4897	3.10421	-10.5808	-1.93675	-6.42521	-9.7136	-7.69384	6.20697	-3.04219	-1.1438	-6.30636	-7.22814	9.41478	-10.8225	-10.5045	-0.667772	-2.11301	-2.46312	-1.10182	-6.52184	2.03186	1.64011	1.47431	-7.51051	-12.7785	-9.60114	-2.69754	3.44477	-2.82819	-1.18964
46	-1.42634	-2.04243	-4.01772	3.13754	-5.16908	-7.72096	-3.65918	-6.61173	-7.13995	-13.0262	1.82281	-10.6803	-1.84019	-5.95587	-7.2716	-7.19333	5.86006	-2.71808	-1.02226	-7.40802	-7.82069	8.4252	-10.1606	-10.6012	-1.46626	-2.95691	-2.3873	-2.46583	-5.12119	1.15825	4.03735	2.06862	-9.82682	-11.8014	-5.31674	-7.79243	1.3705	-11.1785	-7.77206
47	-1.23482	-1.16938	-4.30575	2.7035	-5.12313	-7.09165	-4.51605	-6.33308	-6.30622	-12.2897	4.28655	-11.2508	-2.11866	-5.99472	-7.61577	-7.29169	5.44764	-3.01287	-1.3349	-6.62827	-7.0131	9.9511	-11.57	-9.49055	-1.18341	-2.3462	-2.13387	-1.08176	-6.64891	-5.11234	2.92584	3.10796	-7.90722	-12.1203	-9.85449	-3.50214	2.6058	-9.56366	-7.11619
48	-1.75354	-2.66375	-3.14648	2.64383	-4.44188	-7.02938	-3.53959	-6.63973	-8.00227	-10.7922	3.51906	-10.7189	-0.973034	-5.42773	-8.46455	-6.95478	5.9468	-2.94427	-1.15081	-7.17066	-7.60524	8.057	1.27367	-9.17877	-0.570874	-2.00063	-2.69621	-1.30151	-6.61141	-5.3756	2.11626	2.91888	-9.12383	-13.0805	-10.1562	-4.37347	4.0963	-5.18715	-7.24162
49	-1.24962	-2.18475	-3.32246	2.87673	-4.90248	-7.19188	-4.01915	-6.10194	-6.12634	-9.70327	1.90777	-10.0377	-1.493	-5.47529	-7.96109	-6.95115	4.77054	-3.40566	-0.753124	-7.23574	-7.16765	6.59495	-10.8419	-10.902	-0.272744	-3.0265	-2.36001	-0.616208	-7.06966	1.70665	4.32686	2.78631	-4.88345	-14.9745	-9.59577	-4.4143	3.98452	-11.5576	-7.13566
50	-1.17043	-1.42491	-3.25008	2.30799	-5.00462	-7.01378	-3.67732	-7.71821	-5.68828	-10.5985	2.72065	-10.6245	-1.01695	-4.77431	-7.22454	-7.12203	4.60294	-2.81901	-0.80491	-6.64849	-6.18326	5.39926	-10.2349	-6.76272	0.322873	-2.58971	-2.0222	-2.35999	-8.07783	-5.06312	8.4376	-0.297636	-5.6546	-16.2739	-9.37305	-4.44729	4.83895	-11.2733	-5.65051
51	-0.338472	-1.81946	-3.55345	2.88287	-5.17557	-7.0279	-3.20437	-7.06914	-6.04714	-11.7264	4.14417	-11.7348	-2.22876	-4.54919	-7.42869	-6.73066	4.81915	-2.95427	-0.991149	-6.48601	-7.10925	6.14974	-8.64467	-8.77819	-0.674501	-2.07642	-5.4662	-3.21905	-7.36797	-6.34095	8.54894	-1.2021	-7.25746	-15.5957	-5.34022	-8.1181	6.38082	-9.29153	-0.95613
52	-0.764828	-2.34171	-3.5995	2.23296	-5.70777	-6.30683	-4.50286	-6.26687	-5.24936	-14.7895	3.04741	-9.19176	-1.00265	-5.50469	-7.3759	-7.13982	5.53384	-2.77834	-0.147504	-6.70506	-6.18445	4.28379	-9.50807	-0.251886	-0.131802	-2.41238	-1.31439	-2.78725	-6.58354	-5.61969	11.7654	1.71455	-7.6934	-16.7752	-9.58745	-4.02701	6.46694	-10.3532	-7.70265
53	-0.165469	-1.67687	-2.99437	2.92123	-4.60529	-6.60745	-3.03631	-5.9084	-6.59421	-10.3236	3.81063	-8.85226	-1.90531	-5.5873	-8.11959	-7.16637	5.12492	-3.33891	-0.608123	-6.82539	-6.16675	4.34861	-10.9363	-9.49709	-3.39309	-2.57448	-1.88451	-4.33394	-5.83672	-5.22124	14.9651	1.2244	-8.53661	-16.7302	-9.21627	-7.79392	7.63956	-5.32462	-7.52822
54	-0.958106	-1.60662	-3.84869	1.71612	-4.62122	-6.65874	-4.59226	-6.3322	-5.85826	-9.19528	2.31597	-7.57348	-0.540381	-0.731234	-7.82651	-6.57957	4.92303	-3.29584	-0.964913	-7.41246	-5.2692	5.80684	-6.50002	-8.81401	-0.752706	-2.88044	-1.90771	-4.11284	-6.24689	-5.11323	19.4486	1.13399	-8.52777	-17.8314	-5.86075	-3.8242	5.77488	-7.10109	-7.36284
55	-0.447578	-1.82944	-3.81207	1.82888	-4.947	-6.22269	-3.37256	-7.15996	-5.72133	-10.0691	3.45789	-8.60472	-0.332859	-4.91618	-7.40327	-6.98029	4.81582	-3.59714	-0.924284	-7.17228	-7.01043	7.85439	-9.94472	-8.09825	0.172688	-2.52446	-2.14277	-5.2481	-5.80771	-4.62263	21.1996	0.831964	-6.92886	-17.8011	-8.80161	-3.78126	5.10972	-8.17983	-0.523264
56	-0.968647	-1.39053	-3.19581	2.9111	-4.60401	-5.75046	-3.14804	-5.59993	-6.66189	-11.068	3.92184	-6.0937	-3.94225	-5.31411	-6.57388	-6.75959	4.75693	-2.86341	-0.774295	-6.91608	-5.86853	7.12129	-9.22273	-6.85686	0.412858	-2.05667	-2.06895	-5.51292	-6.19917	-5.8697	22.5811	1.64435	-6.64908	-19.3219	-9.42411	-7.13762	7.52691	-9.64577	-1.71203
57	-0.607481	-1.64383	-3.76508	1.63742	-5.17104	-6.56656	-4.03743	-6.84761	-6.52182	-11.3594	5.21404	-9.66422	-1.20211	-5.41081	-5.99524	-6.22761	4.58404	-2.98776	-1.08867	-6.60049	-6.28686	5.76471	-9.04528	-7.75078	0.573331	-1.87851	-2.48009	-5.49885	-6.19492	2.39361	20.5353	1.82443	-7.82425	-19.1659	-9.59228	-2.67496	6.07292	-2.1729	-6.19517
58	-0.446523	-2.12932	-2.85164	1.66024	-4.74683	-6.15264	-3.20794	-6.33796	-7.51834	-9.5113	3.80417	-8.74595	-1.43471	-4.34049	-6.20959	-5.86803	4.4727	-2.39018	-0.0180286	-7.08921	-5.17133	6.55748	-10.0859	-8.18149	1.1013	-1.56294	-1.11092	-3.88058	-6.59008	-4.12308	21.1878	1.27633	-9.72372	-19.2827	-8.84585	-7.14663	4.04715	-7.77041	-4.448
59	-0.0883241	-1.6797	-3.24218	2.30589	-5.05358	-6.16307	-5.13263	-4.7475	-6.46178	-13.4551	4.30383	-9.65448	-1.62938	-5.48136	-6.24402	-6.02607	4.89271	-2.97047	-0.421236	-6.24053	-6.55786	6.09097	-8.52938	-7.73977	-0.57081	-1.99362	-2.18749	-3.83001	-5.65308	-5.32307	20.9603	-0.610253	-7.43073	-19.9096	-8.14534	-2.60298	6.20574	-10.6142	-6.24101
60	-0.902432	-2.10334	-3.22994	1.58012	-4.95833	-5.53168	-3.77979	-5.15518	-6.20558	-8.83699	6.10259	-7.81063	-0.842426	-4.18209	-5.38831	-5.65602	4.40563	-2.93765	-1.32437	-6.06656	-6.39824	5.05889	-10.11	-7.78002	-3.58772	-2.40497	-2.04637	-4.04869	-5.30064	-3.21577	19.2923	1.37105	-7.77633	-20.404	-8.7601	-7.15647	8.322	-5.60463	-5.67356
61	-0.456334	-1.5325	-3.29914	1.85902	-5.07435	-5.91303	-2.24341	-5.57117	-5.02337	-14.1263	5.40863	-5.77388	-1.23194	-4.346	-5.59986	-6.09449	4.52606	-2.691	-2.29041	-5.83012	-5.55018	7.05243	-6.41977	-5.88677	-3.08178	-1.75383	-1.57616	-4.08827	-5.74221	-5.90188	16.9447	0.573864	-7.39827	-21.5986	-7.34366	-4.20219	5.86931	-11.1789	-7.07601
62	-0.462604	-2.14095	-2.6276	1.3826	-4.31734	-6.02076	-4.71165	-5.31678	-6.13783	-8.45243	4.73017	-8.69456	-0.0838654	-4.88375	-5.43985	-6.90644	5.24737	-2.83129	-2.63201	-5.41617	-4.30411	2.95481	-8.01251	-6.62585	0.111075	-2.03868	-4.85109	-4.15028	-4.44114	-4.77945	17.8498	0.539486	-10.4014	-21.8058	-8.22954	-4.24664	5.33059	-9.37345	-6.1423
63	-0.329715	-2.32662	-3.21948	1.06519	-5.353	-5.63059	-4.29434	-5.79407	-4.71458	-13.23	-4.87875	-7.90377	-1.17262	-4.06161	-6.26289	-6.48579	3.88169	-3.10643	-1.09447	-4.87959	-4.6389	4.78862	0.946152	-7.79519	-2.60873	-2.31985	-4.95143	-3.77291	-6.27603	-3.77954	17.8122	3.73583	-8.07015	-21.245	-8.96775	-6.54893	5.58317	-7.79994	-7.35502
64	-0.56186	-2.7163	-3.40085	0.758492	-4.26548	-5.74568	-3.94837	-6.27311	-4.13721	-7.9992	-5.60104	-7.2033	-1.37017	-4.43867	-5.46728	-5.06743	3.80498	-3.73249	-2.28764	-5.54779	-4.34363	5.92035	-9.26926	-6.81836	-2.01531	-2.80805	-4.74831	-3.76679	-4.87843	2.91814	12.7344	2.36047	-6.46614	-19.5888	-8.13256	-7.60599	7.70566	-8.14448	-7.21573
65	-0.39033	-1.97935	-3.42856	1.15968	-4.69523	-5.19349	-3.5629	-4.64233	-5.81396	-6.8516	4.4224	-9.00665	0.313343	-4.56863	-5.58852	-5.96795	4.61547	-2.45401	-1.83041	-6.2163	-4.90437	9.16338	-7.90876	-5.35641	-0.588816	-2.7037	-1.58893	-3.67592	-5.86877	-4.67444	9.65571	3.17715	-7.54039	-18.1596	-7.74791	-6.19468	5.31542	-8.67485	-1.80539
66	-0.0821229	-1.02834	-3.25895	1.2797	-4.63774	-5.02619	-3.36604	-6.40462	-5.4853	-10.063	-5.15416	-7.64427	-1.06734	-4.80941	-3.99118	-6.62165	3.78713	-2.72991	-2.34768	-4.75792	-4.47029	6.75399	-6.17949	-7.69517	-1.86543	-2.23272	-3.94936	-1.65245	-4.68567	-4.41466	7.87153	2.49949	-6.7385	-16.1267	-8.00524	-6.05291	8.55575	-8.44432	-6.98881
67	-0.334043	-1.65314	-3.06055	1.39571	-4.46611	-5.56332	-4.13265	-5.75981	-5.79075	-10.9144	-5.30431	-7.87596	-1.51099	-3.39392	-5.42302	-6.21336	4.796	-2.52991	-1.95938	-6.02556	-3.9762	8.13981	-7.82023	-10.0728	-0.630489	-2.44722	-1.64591	-1.75133	-5.75662	-5.84506	13.3196	2.67125	-6.71557	-12.4825	-7.57824	-7.09839	7.24692	-8.61667	-4.31146
68	-0.88415	-1.79704	-2.77249	0.670387	-4.42826	-5.30781	-4.02798	-5.01102	-5.84451	-10.5889	7.50164	-7.31516	0.230118	-4.34838	-4.72053	-5.93899	3.45169	-2.35255	-2.10325	-5.13435	-3.34174	7.00659	-6.6318	-7.31728	-2.15338	-2.04853	-1.13014	-0.0439944	-5.04964	-4.06456	9.03597	2.42122	-4.90563	-10.5789	-7.17674	-7.20438	7.41811	-8.46757	-6.51702
69	-0.956115	-1.57468	-3.2974	2.26604	-3.55	-5.54281	-4.09542	-5.25799	-4.8216	-7.8745	3.88418	-7.83256	-1.0717	-3.85527	-4.76014	-4.83318	4.41519	-3.28334	-1.95867	-3.68255	-3.76796	7.94997	-5.80747	-8.03745	-3.12838	-1.72	-1.2572	1.342	-5.85314	-4.28695	5.43326	4.62199	-5.41583	-9.82035	-7.57673	-5.93355	5.47591	-8.70057	-0.041822
70	-0.337523	-1.69916	-3.08275	1.27368	-4.8989	-5.05987	-3.12597	-4.24073	-3.76824	-7.23729	-4.45366	-7.91986	-0.190663	-3.6355	-4.90293	-5.40687	4.28993	-2.43631	-2.06575	-4.71142	-3.85713	7.6609	-7.0737	-7.65757	-2.16505	-2.52559	-0.323031	-3.22876	-3.7988	3.12241	3.14715	3.01602	-5.14326	-4.73093	-7.9234	-6.36941	3.41737	-7.07325	-6.28534
71	-0.856623	-2.31811	-2.73625	1.09837	-4.09982	-4.71561	-3.42082	-4.5809	-4.66173	-7.11065	6.50458	-8.69221	-0.250675	-3.37745	-3.80321	-5.32514	4.21033	-2.22171	-2.02229	-4.06705	-4.13472	5.60361	-6.36587	-5.99304	-1.54157	-2.43803	-4.32716	-0.285256	-4.47736	-3.08675	1.7691	2.60614	-6.2726	-4.6048	-3.61471	-6.12733	4.6189	-8.99511	-7.65923
72	0.211834	-1.28304	-2.41874	0.772824	-4.44723	-4.51453	-3.04175	-4.74523	-4.92673	-6.21198	5.38874	-7.84506	-0.707841	-3.49563	-3.52675	-5.40543	4.16071	-2.8022	-1.03912	-3.80077	-3.51768	6.12923	-6.21624	-7.38271	-2.19899	-2.40815	-3.4267	-0.272382	-4.42896	-4.99493	3.3346	3.41171	-6.33997	-5.14926	-7.04213	-5.53484	6.03929	-8.13469	-6.02046
73	-0.650515	-2.31417	-3.50552	1.64458	-4.42289	-4.47553	-3.89766	-4.25783	-5.50443	-3.84	4.15575	-5.49777	-1.7447	-3.51619	-4.43816	-5.16739	4.01749	-2.39279	-1.88509	-4.15285	-4.51052	7.93411	-7.18462	-8.45116	-1.86896	-1.82463	-3.93193	1.66615	-5.00938	-3.79755	1.14089	1.29099	-6.56915	-4.98263	-7.60738	-5.58155	7.0524	-4.03854	-6.51444
74	-0.109675	-1.24306	-2.75249	0.953508	-4.02671	-4.59396	-4.24566	-4.22383	-3.50264	-7.03986	4.07701	-6.80593	-0.215988	-3.08869	-3.80688	-5.1084	3.7884	-2.3411	-1.22668	-4.26214	-3.91559	5.77626	-5.23857	-7.12684	-2.09427	-2.59709	0.0283414	-2.19012	-5.18045	-3.61904	-1.21004	4.46627	-5.80412	-7.16636	-6.28401	-4.81031	4.4312	-6.08632	-6.85274
75	-0.986533	-2.41575	-2.59222	0.951317	-3.3693	-4.78759	-3.90517	-4.30472	-5.13198	-5.25036	-4.66363	-5.0333	0.0296935	-3.71367	-2.95325	-4.90848	3.57238	-2.19443	-1.97208	-4.07091	-2.01446	5.7095	-4.94796	-8.10224	-1.79035	-1.39981	-4.24821	-1.23823	-4.77914	-3.75163	-0.949396	4.53383	-2.18005	-6.64653	-7.82624	-5.0782	9.65804	-7.85597	-5.8911
76	0.213223	-1.63847	-2.86572	0.329679	-4.14956	-4.49169	-3.23527	-4.67269	-3.60586	-4.24299	-4.42579	-4.32841	-2.29258	-3.44808	-3.11004	-4.30955	3.63986	-2.47685	-1.54657	-3.44731	-3.02233	7.12167	-5.85786	-6.30931	-0.599977	-2.36906	-4.08858	-2.05052	-4.27871	-4.26752	-2.79803	-2.89287	-4.36228	-5.87486	-7.11059	-4.72342	3.50248	-6.33252	-4.77026
77	0.019516	-1.19574	-2.96266	0.633913	-3.34198	-4.20047	-3.33979	-3.37028	-3.70612	-3.79944	-4.86897	-5.53111	-0.546294	-4.11727	-3.22128	-3.96263	3.03203	-1.91347	-1.89662	-2.83151	-2.8503	4.89899	-7.07868	-6.64236	-1.4096	-0.533476	-4.44592	0.00934332	-4.89832	-3.87954	-4.71125	-4.30906	-6.21728	-7.32915	-7.56528	-4.37185	7.14399	-5.41766	-5.22227
78	-0.101961	-1.7986	-3.02108	0.456472	-3.87326	-4.4355	-4.16399	-4.28454	-3.81457	-4.60488	-4.14452	-4.99513	-1.00378	-1.42508	-2.81532	-4.22668	3.04305	-2.06068	-1.60727	-2.96309	-0.891295	3.56247	-4.96516	-6.1102	-1.53831	-1.20448	-0.47568	-0.205502	-5.27396	-3.08086	-4.84624	-3.52789	-2.46557	-8.44448	-7.36551	-4.45173	3.01621	-6.97553	-6.42306
79	0.534585	-1.71359	-2.02279	0.863527	-3.73649	-4.87301	-3.87571	-3.5941	-3.24931	-3.07905	-5.50421	-3.9025	-1.73485	-2.62239	-3.61555	-4.61227	3.22372	-1.7591	-1.90923	-2.38432	-1.81483	5.83964	-6.05674	-6.34164	-1.20555	-1.27501	-3.79891	0.355369	-5.12655	-3.81773	-5.33833	-3.4948	-4.94452	-9.39146	-6.96793	-4.99635	3.8995	-6.91961	-4.82665
80	0.398531	-1.32076	-2.01708	1.03992	-3.94936	-4.31334	-3.61751	-3.55088	-4.78134	-2.60756	-3.41892	-8.47478	-1.13099	-2.04601	-2.85064	-4.44802	2.78144	-1.91606	-2.0634	-2.07717	-2.32402	2.92301	-6.77683	-6.51133	-1.40343	-1.35996	-3.54227	1.29409	-4.32237	4.26859	1.09425	3.34931	-2.53564	-9.0071	-6.87346	-4.71559	4.21078	-4.74892	-1.76124
81	-0.203453	-2.15358	-2.59704	0.487123	-2.82949	-4.6578	-3.96927	-3.88096	-3.13419	-3.2769	-4.43593	-4.35278	-0.700605	-2.30848	-3.39228	-4.12307	2.78703	-2.18552	-1.78793	-2.43897	-2.84271	5.53134	-6.29833	-4.5823	-1.42439	-1.14055	-4.09863	1.64031	-3.29953	-2.35534	-0.52822	5.30678	-5.36622	-11.4416	-6.65604	-4.37533	4.7869	-4.75126	-2.11865
82	0.289217	-1.1198	-2.59445	0.659978	-3.97326	-4.62905	-3.24782	-3.91136	-3.69667	-3.7338	-2.15467	-6.59086	-0.311282	-0.788482	-6.09955	-4.09464	2.49715	-2.87104	-0.698139	-2.65459	-1.37947	7.5941	-5.68215	-6.67977	-1.70945	-1.88641	-3.53471	-1.27905	-3.54706	-2.75904	-2.55989	3.86772	-4.70847	-10.5681	-5.77724	-5.53008	4.78578	-5.90437	-4.73852
83	-0.337012	-1.91428	-2.70112	0.84438	-2.8657	-4.9845	-3.30452	-3.31986	-3.56351	-2.92298	-3.11805	-4.33085	-0.00855697	-2.17207	-1.41721	-4.55033	2.11042	-2.08143	-1.85224	-2.78756	-5.23558	6.39264	-6.30321	-5.58224	-1.65914	-1.67441	-3.75489	-0.364014	-2.96584	-2.36826	-0.507019	7.22572	-6.75414	-11.4228	-5.50268	-6.07675	5.35087	-4.11235	-3.94521
84	0.870842	-1.86013	-2.36567	0.194063	-2.83971	-3.83008	-4.07825	-4.56535	-3.47743	-2.2114	-5.10535	-6.04104	0.274136	-1.13911	-4.86181	-4.00748	1.81698	-2.81053	0.506629	-2.70648	-1.38333	5.92053	-5.19661	-3.74318	-2.22597	-1.80868	-3.34175	-0.427037	-3.47045	-2.07937	-0.53436	6.58922	-2.85856	-11.3764	-5.69706	-4.51627	3.29961	-4.88087	-4.13907
85	0.362608	-1.96306	-1.96771	1.56685	-2.98966	-3.99201	-2.33358	-3.73193	-3.37418	-5.15518	7.68794	-7.03928	-0.123133	-1.25741	-0.424491	-3.92462	1.93589	-2.19604	-2.62145	-3.6118	-0.748641	6.36361	-5.18339	-6.07921	-1.11104	-0.926886	-3.84941	0.114658	-4.09397	-2.75528	-5.58145	4.22845	-4.7882	-10.4813	-6.08991	-4.00261	2.79921	-6.31856	-4.00591
86	0.430816	-2.11001	-2.68053	1.00677	-3.31647	-4.1586	-1.55914	-4.70394	-4.34584	-4.67503	-2.75362	-4.76501	-0.316154	-1.397	-5.40665	-4.0121	1.83864	-2.59935	-0.293218	-2.55321	-1.35177	5.01811	-1.68401	-6.21898	-1.07448	-2.16196	-3.67069	2.05236	-2.92237	-2.00851	-5.25074	5.33404	-3.50146	-8.41038	-4.90873	-3.46324	4.90624	-5.4221	-5.42973
87	-0.391323	-1.43076	-2.7305	1.19075	-2.95544	-3.3962	-2.92346	-3.52055	-3.94518	-4.52055	0.407494	-5.55871	-0.391814	-2.02718	-5.88161	-3.82039	2.09225	-2.69312	-1.34204	-2.08806	-2.00151	3.40351	-3.06256	-4.58548	-1.03771	-1.26525	-3.0771	1.66758	-4.16802	-2.8976	1.53071	4.76358	-3.75964	-9.05888	-5.13563	-4.20874	6.31825	-6.57494	-5.81544
88	0.309823	-1.58402	-2.48795	0.827904	-3.06068	-3.6727	-3.09463	-4.50317	-4.07665	-3.29182	-2.58296	-5.79706	1.30887	-1.26338	-5.26937	-3.48423	1.59237	-2.62503	-1.46263	-2.30297	-1.5553	2.65111	-3.65723	-5.23836	-1.35234	-2.28152	-3.45797	2.09651	-3.48448	-1.7852	-1.00942	-3.01957	-4.13485	-9.27021	-5.65826	-3.79742	4.3447	-4.98985	-4.93178
89	0.444636	-0.346316	-2.32859	1.40915	-3.46448	-3.52737	-2.09576	-3.3806	-2.04584	-1.26883	-2.56916	-4.61798	-1.0552	-1.6719	-1.33095	-3.36209	1.71598	-1.73472	-1.62648	-1.77709	-0.558386	-1.31385	-5.38614	-5.28622	-1.95538	-1.66004	-3.48932	2.35395	-3.12561	-2.24569	0.388219	-1.97618	-3.52583	-8.50069	-5.38649	-4.01872	3.83582	-5.35828	-4.74843
90	-0.399001	-1.51089	-2.26511	0.655288	-2.20312	-3.60766	-2.32221	-1.98186	-3.15024	-1.40978	-3.80917	-3.62373	0.762593	-0.769	-1.55048	-3.23091	0.99602	-2.51235	-0.696036	-0.164451	-0.940068	-2.14973	-3.25932	-5.86637	-0.189483	-1.74633	-2.55527	2.37927	-3.8791	-2.27559	-0.102677	-2.95909	-3.51792	-8.78418	-4.6665	-5.09179	1.96754	-6.16684	-5.81773
91	-0.299697	-1.51361	-2.0735	1.266	-2.94002	-3.77746	-3.60052	-4.50684	-4.13843	2.8129	6.72667	-4.26345	1.35613	-0.65704	-5.4425	-2.98089	1.06612	-2.33801	-1.68956	-1.33412	-0.0254786	-3.29678	-4.8871	-6.28186	-0.66179	-0.894951	-3.4294	3.61538	-3.39054	-1.3482	0.225112	-3.24957	-3.23629	-8.01699	-5.20071	-3.11874	1.94894	-4.14121	-5.12384
92	0.353529	-1.2163	-1.75332	1.51227	-2.25278	-2.13005	-2.1204	-3.35913	-3.56964	3.33868	-1.5732	-4.09026	0.526373	-0.749715	-4.50243	-2.3432	2.1944	-1.61211	-0.632712	-2.04263	-0.676329	-4.27316	-3.78774	-3.95039	-0.724296	-1.58273	-3.24937	2.764	-3.67951	-2.77663	-6.20063	-2.50349	-1.47232	-5.91201	-4.64896	-3.53758	1.8012	-4.964	-6.03491
93	-0.136859	-0.949101	-1.72696	0.707385	-3.16403	-3.07075	-2.90022	-2.53352	-2.45141	-0.591982	-3.15059	-3.214	-2.47644	-2.09746	0.456834	-3.00396	2.03039	-1.38616	-1.39329	-1.09439	-1.10386	-6.29789	-4.30822	-3.86313	-1.37942	-0.910758	-2.41426	1.97743	-3.82483	-3.23686	-6.12681	-3.1174	-1.88899	-4.98674	-4.88742	-4.3906	-0.0498323	-3.73888	-6.05795
94	-0.213495	-0.719889	-2.25352	0.31404	-2.21197	-3.09239	-2.74775	-3.68223	-3.32162	1.33351	-1.90698	-3.77682	1.6109	-0.763439	-3.35452	-2.95836	0.72679	-2.09762	-0.773524	-0.699614	-0.221005	-7.01404	-4.44278	-5.37468	-0.596633	-0.363009	-3.06895	0.0354616	-3.05815	-3.64953	-5.04814	-4.72375	-1.22999	-1.716	-4.29893	-3.88663	0.127145	-5.89703	-5.2307
95	0.0660565	-1.04678	-1.99523	0.388556	-2.84595	-3.54104	-0.435492	-3.33941	-2.28101	0.561636	-2.96993	-5.33574	0.90986	0.069994	-3.37472	-2.73727	1.51755	-2.3328	-0.685164	-0.482168	0.317034	-6.43035	-3.83248	-2.97568	-0.851712	-0.850024	-2.76387	-0.351393	-4.28042	-3.02319	-1.60466	-2.66009	-3.45481	-0.026193	-3.64468	-4.75492	0.620951	-5.19508	-3.32124
96	0.030743	-0.451479	-2.17416	1.21057	-2.58096	-2.81853	-0.598623	-3.2114	-1.14243	2.22291	-3.2997	-3.53868	1.02492	-1.60955	-3.75471	-2.65066	1.44377	-2.25805	0.963945	-0.606337	-0.601673	-7.3006	-4.24977	-3.2502	-0.594993	-1.38892	-2.25319	-1.1844	-5.67974	-2.02478	4.02813	-2.65658	-0.43601	2.87998	-4.14557	-3.29356	1.4038	-4.58208	-3.16835
97	0.425333	-1.11186	-1.79592	0.149296	-2.34294	-2.76366	-0.650217	-4.38663	-3.21823	4.38663	-4.44086	-3.26505	0.865353	-0.326252	-2.89065	-2.24474	1.59827	-2.4174	-1.62332	-0.31433	-4.53691	-5.4014	-1.93884	-1.59266	-0.696544	-1.44208	-2.94282	-2.33794	-4.24778	-3.18479	6.62935	-2.74263	-3.13748	4.32169	-4.3226	-3.65754	4.31569	-4.67898	-6.60973
98	-0.0950685	-0.650749	-1.90419	0.504151	-2.17341	-2.67381	-1.78579	-3.58815	-1.83191	3.74851	-2.822	-2.0965	0.475173	-0.247324	-3.09977	-2.04727	1.59419	-2.0987	-0.816486	-0.728992	0.129373	-6.04538	-4.87925	-4.89826	-0.110348	-0.903218	-2.98098	-1.50686	-2.7047	4.4095	6.729	-3.27057	-0.675943	4.89292	-4.1043	-3.06231	3.36505	-4.49212	-5.0078
99	0.0303795	-0.541507	-1.65048	1.2615	-1.64141	-2.50931	-1.42749	-2.27651	-3.48591	5.09722	-2.20842	-4.83264	0.490134	0.212625	-3.56308	-1.69191	0.990464	-0.961103	-0.247258	-0.881178	0.636231	-3.88902	-2.35204	-3.86908	-0.942786	-0.47783	-2.06422	-1.24398	-2.03389	-2.70846	5.49713	-2.48174	-1.315	5.07654	-4.22074	-3.76994	2.60173	-3.08553	-5.53294
100	-0.119093	-0.787287	-1.92125	1.06283	-1.82521	-2.92413	-0.816254	-1.6995	-3.35113	5.29327	-1.55533	-4.60425	-2.59857	1.4083	-2.9277	-1.86222	1.21194	-1.23381	0.277495	-0.423828	-4.54239	-6.06838	-3.00988	-3.04199	0.23254	-1.06005	-2.38099	0.937885	-2.16692	-2.55488	6.35207	-3.39118	-1.03953	3.35495	-4.1993	-3.44131	2.24747	-4.36712	-4.26728
101	0.353647	-0.758545	-1.28773	1.13825	-2.04631	-2.19794	-1.633	-1.86735	-2.89302	5.6482	-1.68599	-2.61859	-0.264557	0.59491	-3.23068	-1.69582	1.79095	-0.9223	-0.192311	-0.728917	-0.431388	-3.86126	-2.55918	-2.73421	-0.204933	0.258353	-1.70399	-2.42345	-2.27502	-2.52518	8.26901	-2.84504	-0.746253	1.7034	-3.93711	-3.11228	3.75571	-4.63703	-5.0529
102	-0.636583	-1.57682	-1.41384	0.501424	-2.02954	-1.90042	-1.14876	-1.97616	-1.88693	5.37337	-1.02365	-3.48842	-2.45414	1.89684	-3.65835	-1.14664	1.35823	-1.53395	1.02466	1.42354	-2.92765	-5.2993	-3.36224	-2.43959	-0.815685	-0.461149	-1.97373	-2.44646	-2.07814	-1.26816	7.20958	-2.38724	-0.431649	-0.159633	-4.22199	-2.62329	4.28765	-4.35212	-0.172073
103	0.0673551	-0.127365	-1.48148	1.0544	-2.20225	-2.10358	-1.17872	-1.19175	-2.09588	5.65562	-1.87339	-3.69425	-3.20469	-4.45915	-2.0882	-2.301	1.76841	-0.642975	-0.921219	0.0650184	-2.71635	-4.322	-2.38014	-1.31879	-1.15428	-1.30227	-2.41316	-0.519954	-2.32633	-2.66317	5.90403	1.08666	-1.37999	-1.22915	-3.64185	-3.01206	6.97118	-3.37551	0.836912
104	-0.296728	-0.0417711	-1.61968	0.436494	-2.03328	-2.66614	-0.133822	-1.01326	-1.19946	6.19767	-1.42319	-1.94895	-2.02266	-0.436908	-2.67838	-2.36286	0.495816	-1.78184	-0.868043	0.302239	-4.34623	-3.11365	-2.52645	-2.21657	-1.51084	-0.729969	-1.94868	-0.680769	-2.59896	-1.65841	2.77374	-0.34071	0.364814	0.276519	-3.85024	-1.34487	5.4822	-4.20016	-1.41079
105	-1.20934	-0.517708	-1.51137	0.192852	-1.6959	-2.2195	-2.02057	-1.42212	-0.9124	6.8417	-1.96732	-1.93961	2.09535	1.11163	-2.73356	-2.04238	0.99781	-0.517149	-1.1071	-0.732168	-2.14748	-4.40783	-1.67037	-2.24039	-0.35139	-1.17675	-1.72618	-1.35772	-1.21718	-1.49281	2.54885	-1.07765	-0.899396	4.1421	-4.04424	-2.30559	4.63502	-4.23334	-3.33296
106	-0.177098	0.117214	-1.79751	-0.0746546	-1.91547	-1.82209	-2.47224	-1.39122	-0.385239	3.548	-1.1414	-2.90068	0.995524	0.616295	-2.69369	-2.13629	1.60801	-1.15379	-0.385234	-3.28958	-3.19977	-2.84582	-2.37412	-3.6595	-0.247458	-1.03464	-1.64371	-0.214748	-0.674864	-1.3428	-0.831437	-1.57525	-1.93412	4.24505	-4.09548	-3.39984	5.18262	-3.76361	-3.91317
107	0.0144449	-0.697472	-1.12085	0.18558	-1.70253	-1.97401	-0.231117	-1.34762	-1.68358	3.2479	-1.42537	-4.19841	1.53949	1.1924	-2.53706	-2.06487	1.29996	-1.59074	-0.857267	-3.15441	-3.63359	-5.46611	-2.52873	-2.65911	-0.849509	-0.529734	-2.31519	-0.121259	-2.77307	-0.978365	2.25255	-1.09316	-0.0800996	2.9371	-3.59536	-2.21777	6.04638	-3.70819	-3.56837
108	0.0139287	-0.82056	-0.696617	0.341544	-0.187301	-1.59283	-2.28558	-1.05784	-0.678722	2.84474	-3.21337	-3.67501	0.791857	0.7967	-1.22059	-1.9368	1.3435	-1.37312	-1.0285	0.336438	-2.06455	-4.22174	-4.49136	-2.8355	-0.695419	-0.378164	-1.55832	0.652465	-1.23613	-0.824747	1.68822	0.775688	-3.36435	0.908693	-2.83089	-2.59696	6.57493	-2.05055	-4.46463
109	0.66521	0.420425	-0.694951	0.201334	-1.78393	-1.97295	-3.42665	-0.398618	-0.859147	3.28511	-1.36859	-1.69961	-2.82723	0.220171	-1.48437	-1.58349	0.71325	-0.454467	-1.52848	0.506677	1.06782	-4.95814	-4.01429	-0.54868	-0.23227	-0.982627	-1.15226	1.03473	-1.18563	-1.03019	1.242	-2.57821	-0.224117	-0.0745925	-3.39059	-2.21486	6.70705	-3.62252	-5.20916
110	-0.215061	-0.607819	-0.696584	-0.272559	-1.72994	-1.70497	-1.97647	-1.98936	-1.203	1.25236	-3.13594	-0.753221	0.926304	-2.46344	-1.27514	-1.81309	0.369279	-1.14526	-0.786642	0.642878	2.53147	-3.5861	-0.980496	-2.33101	-0.16652	-0.814068	-1.2317	2.20964	0.268653	-0.510829	1.40371	-1.28985	-2.80655	-1.04396	-1.76354	-0.415562	3.48325	-2.54058	-2.8859
111	-0.0772795	-1.13322	-1.07292	-0.485826	-1.77865	-1.92007	-0.925943	-1.3083	0.152386	2.1251	-2.71041	-2.10382	-2.3126	1.26657	-1.26974	-0.243014	1.02382	-1.19103	0.176188	2.07368	-2.07422	-4.45317	-1.71531	-1.96775	0.221869	-0.306767	-1.31983	2.95083	-0.79777	-1.10362	0.338692	-0.198427	-2.82371	0.870273	-1.88868	0.282245	4.62265	-2.67495	-2.96698
112	0.572675	-0.560929	-1.21921	0.288487	-1.16985	-1.29676	0.465001	-0.651032	-1.75319	2.92466	-0.836809	-1.92777	0.733452	1.2871	-2.53381	-1.50138	-0.374365	-1.26964	-1.10535	-2.19844	-2.91634	-1.7029	-2.11907	-1.8811	-0.389651	-0.467177	-1.49872	1.64019	-1.9421	-1.00437	-2.36351	-1.18549	-0.158657	2.07572	-2.22625	-0.352448	3.50804	-1.65801	-3.30414
113	0.759189	-1.02071	-1.33593	0.650612	-1.6315	-0.699955	-0.404607	-1.73413	-1.47628	2.90659	-2.37338	-1.8549	0.809816	1.38727	-0.410161	-1.70659	0.475532	-1.23308	-1.04797	-2.83841	-2.53316	-3.10654	-0.235159	0.644717	0.345604	0.0209158	-1.06917	0.645033	-1.22721	-1.09446	-3.27298	-1.12879	0.148408	2.98624	-2.46577	-0.236398	5.27705	-1.45901	-4.31023
114	0.0979935	-1.07321	-1.21283	-0.0676451	-1.37696	-1.24147	-0.62569	-1.09893	-2.19209	2.42496	-0.242643	-2.56031	1.14757	-2.65566	-1.27884	-1.10516	0.000418384	0.150012	-0.52021	-2.69986	2.20449	-5.41048	-3.10171	-2.07031	-0.0592541	-0.47294	-1.00278	1.12675	-0.407425	-1.27755	-4.09572	-1.97516	-2.48686	2.37971	-2.52776	-1.12334	4.97856	-2.03374	-4.19768
115	-0.401345	-0.224665	-0.502239	-0.0192894	-0.644226	-0.988494	-0.41033	-0.499854	-0.277109	2.93215	-2.3217	-1.01025	0.934932	1.06277	-1.54736	-1.29496	0.0822556	-0.965131	-0.535728	1.90115	-1.59425	-3.33167	-0.546469	-2.13176	-0.232212	-0.503581	-0.733439	-0.924312	-1.2985	-0.863045	-4.25113	-1.1287	-2.47226	3.45761	-2.41012	-0.610159	3.80636	-3.43383	-2.40709
116	-0.700452	-0.301829	-0.560989	0.321488	-0.744204	-1.02654	-1.42166	-1.32108	-1.60878	3.12437	-1.37714	-0.265381	1.04771	1.05786	-1.03132	-1.35978	0.357964	-0.672678	-0.802511	1.01118	-2.52726	-4.06504	-1.3813	-3.60824	0.827427	-1.35771	-1.1664	-1.34969	-1.46691	0.470516	-6.94485	-0.426372	-2.33005	0.926317	-2.76051	-0.345779	3.24619	0.225608	-1.30108
117	-0.0662152	-0.449507	-0.166212	0.0791289	-0.352361	-0.973187	-0.648014	-0.246634	-0.313897	3.28872	-1.37419	-3.05938	-2.46481	0.84631	-1.00181	-0.976974	-0.112325	-0.984389	-0.245364	-2.70842	-1.50747	-2.92519	-2.70946	-1.29198	-0.117334	-0.918718	-1.62009	-2.65401	-0.676451	-1.57723	-0.234098	-1.03351	-3.71832	0.981037	-3.07022	-1.01885	4.21676	-0.919521	-1.18081
118	-0.325528	-0.355449	-0.0374774	-0.12436	-0.449459	-1.05447	-0.40278	-1.22702	-1.1855	3.72056	-0.0131148	-1.19357	2.07497	-2.2625	-1.30625	-0.926588	0.380712	-0.633817	0.655409	1.52842	-1.98441	-2.80041	-0.705579	-2.7172	0.264462	-0.718182	-1.37097	0.616	-0.328267	-0.97811	-1.19052	-1.87036	-1.58382	2.45248	-1.62122	-1.88847	5.88758	-2.74792	-1.97787
119	0.092095	-0.572205	-0.460916	-0.0535899	-0.713562	-0.557044	-0.876345	0.606043	-0.890974	4.93579	-2.56177	-0.49498	0.139405	2.55166	-1.08075	-0.502085	-0.0368812	-0.251825	-1.02017	2.26802	-0.14344	0.572735	-3.10117	1.21601	-0.303141	0.0827742	-1.37428	-0.220442	-1.69219	0.674487	-0.585798	-1.90284	-0.422016	-0.600999	-1.17341	-0.945738	5.34361	-2.56936	-1.46909
120	-0.397397	-0.725517	-0.642385	0.561841	-0.152624	0.25381	-0.502583	-1.31745	-1.22254	4.70296	-0.819144	0.132655	-2.51403	3.22579	0.383774	-0.467337	0.163792	-0.516899	0.517872	-1.96236	-0.590219	-0.183681	-1.61348	-0.0512536	-1.02111	-0.131807	-0.801996	-0.799397	-0.39391	-1.12428	-0.58888	-3.26398	-1.85438	-3.31229	1.89822	-1.24003	4.00257	-1.44867	-2.21228
121	-0.494591	0.291714	-0.40682	0.68896	-1.14632	-0.0240456	-0.121956	-1.03539	0.240805	3.87564	-0.426347	-1.92515	-0.36389	-2.21884	-0.110431	-0.091642	-0.19104	-0.648381	-0.723118	-1.82355	-1.25981	1.84299	-0.078465	-0.868493	0.00990812	0.359134	-0.674301	0.405957	-1.05648	-0.378622	-0.281805	-2.56114	-1.7983	-2.81217	1.23338	-0.0767312	2.83467	-0.084554	-2.01128
[truncated: 779 more rows]

## Sheet: Figure 1E ASH VGLUT-pH
Source Data	Figure 1E	ASH VGLUT-pH Data: Individual dF/F(%) traces
		Three trials per animal: Read from left to right; Trial 1 signifies a new animal
		Acquisition Rate: 5 Frames/sec
		Pulse 1		Pulse 2		Pulse 3
[truncated: 653 more rows]
[truncated: 155 more columns]

## Sheet: Fig 1G AWC VGLUT-pH 
Source Data	Figure 1G	AWC VGLUT-pH Data: Individual dF/F(%) traces
[truncated: 580 more rows]
[truncated: 83 more columns]
