# Supplementary material for: Diverse modes of synaptic signaling, regulation, and plasticity distinguish two classes of C. elegans glutamatergic neurons
Source: eLife. 2017 Nov 21;6:e31234. doi: 10.7554/eLife.31234 (PMC5705214; doi:10.7554/eLife.31234)
Supplement: Figure 2—source data 1. [file elife-31234-fig2-data1.xlsx]

## Sheet: Fig 2A
Source Data	Figure 2A	AWC VGLUT-pH Data: Individual dF/F(%) traces
		Three trials per animal: Read from left to right; Trial 1 signifies a new animal
		Acquisition Rate: 5 Frames/sec
		Stimulus OFF:	Frame 10
Frame / Trial #	1	2	3	1	2	3	1	2	3	1	2	3	1	2	3	1	2	3	1	2	3	1	2	3	1	2	3	1	2	3	1	2	3	1	2	3	1	2	2	3	1	2	3	1	2	3	1	2	3
1	0.655517	-1.24514	-0.474557	-1.18801	-0.360421	-1.32804	-0.214182	-0.0563661	-0.301693	0.0174887	0.859695	0.21465	0.450761	0.199192	-0.108095	-0.18453	0.992503	-1.03447	-0.632876	0.244405	0.868658	0.435988	-0.285272	-0.687499	-0.920984	-0.0252779	0.201761	0.610455	-0.339206	0.253676	0.369966	0.251518	0.755137	-0.727074	0.664282	-0.307693	0.192577	-0.413095	-1.29028	-1.36006	0.0210844	-0.33076	0.306913	-0.107782	0.835279	-1.26643	-0.359424	0.562691	0.375255
2	0.154581	0.113079	0.525424	-1.32422	0.191911	-0.509946	0.143476	-0.430397	0.13945	0.587195	-0.126864	0.474989	-0.393589	0.00570753	-0.0596861	0.138389	0.227395	-0.102456	-0.991083	-1.14095	-1.12688	0.66028	-0.701069	0.259805	0.57373	-1.36119	-0.823363	-0.0450827	-1.40231	0.118814	0.579066	0.112482	-0.615596	1.22626	-0.153283	0.114947	0.582395	0.290248	-0.196178	-0.504677	-0.519757	-0.235621	0.821955	0.0662328	-0.559973	0.589368	0.754189	0.239974	0.194
3	0.590339	0.326642	0.0302589	-0.0921883	-0.178667	-0.203977	-0.0755558	0.276204	0.00148634	-1.02455	0.107073	1.38595	-0.967158	0.34188	0.168706	-0.210123	-0.447487	0.00259619	-0.428615	1.76054	0.0593209	0.022837	-0.136874	0.0339924	1.42115	3.96983	0.0989814	-0.0692761	0.0275674	0.254358	0.229886	-0.83171	-0.699999	-1.36639	0.162506	-1.40236	0.0521491	-0.631381	-0.414768	-0.389289	0.382002	0.186656	-0.712244	-0.186797	0.526403	-0.836894	-0.110592	0.280909	-0.448806
4	-0.48443	0.0135646	0.256873	0.131128	-1.26581	-0.158	0.25476	-0.571581	-0.496585	0.0605269	0.123321	-1.3146	0.19526	-0.143256	0.357059	-0.770037	0.15008	0.021385	-0.493436	-0.440895	1.34241	-0.168671	0.638796	0.454453	-0.686452	-0.12841	0.05035	0.424983	0.586767	-0.852904	0.000180991	-1.31074	0.253624	0.577251	-0.0795583	-0.307253	-0.39319	1.02045	0.542304	1.39004	0.0799063	-0.468746	0.355201	-0.974282	0.574664	0.852104	0.686736	-1.09819	0.637792
5	-0.0694938	0.366218	-0.432439	0.570172	0.0214568	0.859749	-0.6035	0.977461	0.425406	0.891459	-0.407886	0.798648	-0.718	0.196281	0.271938	0.33438	0.338553	-0.326451	-0.242357	0.682133	-0.337694	-0.467544	-0.119926	0.0115543	1.16824	-0.804728	-0.342895	0.0347367	0.195818	0.634852	1.20272	0.772069	0.0475786	0.339565	-0.192861	-0.857264	-0.265335	0.21494	1.32254	-0.80114	0.21358	0.241023	-0.495735	-0.00012319	-0.117612	-0.972266	0.478703	-0.654878	-0.363472
6	-0.625431	-0.378224	-0.230513	1.63676	-0.450866	0.556747	-0.216033	1.0055	-0.306169	0.201852	-0.755425	-0.500817	0.619772	-0.670616	-0.940337	-0.0913106	-0.0826697	-0.150659	-0.388049	0.0602826	0.309183	-0.0680866	0.0796093	0.691999	0.430786	-0.692765	-0.00159146	0.0493884	0.20223	0.579471	0.00552221	0.398198	0.774138	0.526422	-0.431738	0.612774	0.389604	-0.055225	0.652799	0.0785604	-0.573894	0.235526	0.0532959	0.506902	0.924945	0.730729	0.559572	0.478925	-0.373731
7	-0.625801	0.0298004	-0.405924	0.291195	0.140499	0.0312894	-0.684931	-0.466621	1.00677	0.570167	1.71405	-0.418239	0.403253	0.190472	-0.397059	-0.382748	-0.370109	0.242029	0.5556	0.575796	0.079409	-0.596295	0.430654	0.362733	-0.910917	0.133519	-0.912323	-0.903661	-0.894865	-0.00604649	-0.432803	0.584038	0.15736	-0.462701	0.125475	0.871369	-0.0248475	0.0433692	-0.3203	-0.154473	-0.940974	0.390263	-0.390407	-0.317699	-0.959854	-0.296011	-0.787915	0.214141	-0.0489084
8	0.257033	-0.14462	0.27845	-0.765738	0.476639	0.84566	0.543376	-0.591485	0.505111	-1.14807	-0.167672	-0.603291	0.559137	-0.508328	0.0342575	-0.149991	-0.794194	-0.142853	0.842344	-0.304099	-0.0663893	0.155855	-0.236532	-0.153484	0.303472	-0.263832	0.981968	-0.474734	0.746147	0.107828	-0.427889	0.71798	0.0282518	-0.495092	0.0948769	0.962288	0.0664349	-0.504438	0.642191	-0.169329	0.620795	-0.577394	-0.735129	0.135447	-1.43454	0.608423	-0.744659	-0.0602419	0.465341
9	0.341001	0.401966	0.586028	-0.378925	-0.148743	-0.635617	0.702658	-0.0907704	-1.10893	-0.535955	0.414127	1.09742	0.568787	0.377882	0.663927	0.335016	0.246163	0.166846	0.037829	-0.499984	-0.427002	0.294967	0.397392	-0.418796	-0.121027	0.872588	1.17067	0.730048	0.748469	0.117948	-0.0734041	-0.161489	0.0987511	-0.10739	-0.274166	-0.935276	0.305417	0.435227	-1.34927	0.550544	-0.180079	0.3024	0.315477	0.722069	0.0534881	-0.750416	0.0445093	0.0505511	-0.248056
10	-0.326119	0.298148	-0.726396	-0.830406	0.145704	-0.29864	-0.308039	0.0441579	0.150709	0.781093	-0.569248	-0.15972	-0.381235	0.19998	-0.140934	-0.128637	0.555002	-0.266111	0.903079	-0.920054	0.216727	0.00186099	-0.263769	-0.913722	-0.513083	-0.472843	-0.37953	0.945918	-0.740666	-1.53147	-0.432277	-0.089496	-0.812131	-0.361923	0.572187	0.539225	-0.597586	-0.223771	-0.85325	-0.695127	-0.050357	-0.205075	0.209706	0.143572	1.25741	-0.521273	-0.831295	0.511246	0.0424361
11	0.788321	-1.02657	0.118238	0.762222	1.06788	-0.487266	0.243789	-0.152471	-0.317253	-0.383718	-0.331472	-0.760333	0.113772	0.00999721	0.0421267	0.925061	0.177267	0.555675	0.204689	0.227232	-0.0490815	0.164797	-0.088281	-0.328537	-1.66591	-1.25217	0.157731	-0.69232	0.53084	0.577145	-0.651006	-0.191331	0.768022	0.123989	0.176561	0.40155	-0.115041	-0.58942	-0.0260656	0.69489	0.968778	0.130968	0.577879	-0.0953226	-0.264931	0.596239	-0.0492488	0.0375616	0.143404
12	0.519792	0.702235	0.210927	1.04619	1.40735	-1.19174	0.229027	0.0612598	1.07147	-0.428536	1.23978	-1.08589	-0.0679543	0.804414	-0.154028	-0.14934	0.456683	0.424617	-0.077221	0.685363	-0.16349	0.227093	-0.0161765	-0.436381	-0.367611	-0.41989	0.388061	-0.379783	-1.97559	1.12805	0.293455	0.809247	-0.117296	0.613906	0.535777	-1.04043	0.460374	-1.23269	0.817091	1.46268	-0.91653	0.168341	0.254878	0.49004	-0.324895	-0.235251	-0.157074	0.582165	-0.318187
13	0.802386	0.506786	0.0295988	-1.64553	-0.0629435	-0.262236	-0.102018	0.0119883	-0.140072	0.653509	1.40622	-0.0216254	-0.337816	0.707718	1.03611	1.16964	0.845304	-0.249553	-0.0452179	-0.728163	0.302645	0.88022	-1.02455	0.386045	-0.15764	-0.0166325	0.926219	-0.468107	-0.589822	0.216181	0.446791	0.745311	0.740041	-0.0934336	0.0747373	0.43666	0.0233245	-1.02929	0.616756	1.41077	-0.0582651	0.0994356	1.01198	-0.416236	1.01394	0.989444	0.899374	0.656437	-0.199448
14	0.945832	0.540338	0.310609	-0.901585	0.727008	1.87288	0.391724	0.670499	0.755196	0.593687	1.30779	0.978745	1.16517	1.13483	-0.631524	0.492726	-0.638852	0.406547	2.06484	-0.14054	1.50095	1.70768	1.69997	-0.221417	1.43859	-0.0212646	-0.344918	0.589439	0.624117	1.18029	0.627603	0.967623	0.983953	1.07257	1.04989	0.765261	0.157682	0.447453	1.34467	1.85807	1.17813	0.51632	1.01391	0.342926	0.33921	0.325211	0.293192	1.62202	0.796835
15	1.91045	0.937894	0.75807	-1.18606	0.627387	1.09354	0.213802	1.36936	0.742318	2.13957	2.41816	1.46467	-0.150248	0.455738	1.37998	0.854139	0.328558	1.07106	0.587639	1.21541	0.89344	1.88164	0.583009	0.0580368	1.0869	0.239013	-0.164071	0.543464	0.639461	-0.623778	0.547192	0.848844	1.27675	1.18697	1.77924	0.99567	0.139974	1.31949	0.218145	0.453437	0.852317	1.3325	0.741025	0.448408	0.558707	0.446619	0.793047	1.14377	0.38135
16	2.66021	0.844858	-0.0833061	1.57327	1.38066	1.9358	1.53967	0.178288	0.627082	0.637097	1.27493	2.01181	0.0865969	0.613461	2.13288	0.486084	0.267038	1.52045	0.601074	0.528932	-0.175227	0.0174813	0.561162	0.18438	1.69439	0.652622	-0.11252	0.595478	0.256709	-0.27362	0.944385	0.968471	1.21562	0.442069	1.91286	1.12016	0.080087	-0.417667	0.7225	0.00196271	1.49956	1.76748	0.0431268	0.568484	1.21086	0.395952	0.780306	-0.445156	-0.0600058
17	1.64517	1.62273	1.32428	-0.439834	2.04177	1.89397	0.998933	2.2464	-0.117989	0.522198	1.44536	2.00682	1.22255	0.63574	1.19325	1.61739	0.885801	0.999799	0.44969	0.300865	1.12567	1.26237	0.792461	0.692447	0.707894	0.332811	1.55032	-0.0549873	1.92437	-0.326704	0.27929	1.02584	0.916835	0.907713	1.8276	1.8262	-0.198111	0.614682	1.09782	0.775818	0.938372	0.500858	-0.027129	2.086	0.502397	0.334917	0.61433	1.0948	1.35015
18	2.45343	1.96326	0.977881	-0.764888	1.80802	0.704464	1.92712	0.470832	0.788032	1.12014	2.52169	2.52438	1.05111	0.533199	2.34206	1.22294	0.623668	0.886401	2.81239	-0.359627	0.0235199	2.50079	1.40372	-0.511705	0.983033	0.962386	1.22438	0.826834	1.81176	0.700948	0.207885	0.878197	0.489186	1.36891	0.658027	1.78984	0.58114	0.367681	1.85583	0.995633	0.975709	1.50674	1.10176	0.702799	1.72908	1.28397	1.8709	0.812749	0.621862
19	1.35119	-0.585983	2.1123	1.03617	1.09171	1.00132	2.34529	1.01898	1.23731	1.87307	3.07337	2.60813	2.54524	1.0634	2.11785	2.28624	1.0537	0.419322	1.49011	2.45288	1.24264	2.11664	1.59006	1.05424	1.40532	0.745181	2.3525	1.83835	1.50555	1.4372	0.737089	1.53654	1.70146	0.531156	0.660678	1.73837	1.38978	0.692747	1.70591	1.26981	0.977507	2.15576	0.98422	1.3315	0.257701	1.52673	0.913973	0.56061	0.258874
20	2.85905	2.20286	1.45326	0.0623601	2.30431	1.80006	2.18465	1.29934	1.42417	0.425215	3.91763	1.98883	0.838923	-0.192222	2.04355	1.76655	0.83826	1.41394	2.31089	-0.0647162	0.650315	2.61055	0.808787	0.928691	2.15043	0.920136	1.28708	2.63818	1.71685	0.702963	1.58316	1.24506	2.63801	1.09943	2.21644	2.07709	1.0616	0.275759	0.777135	1.24711	2.57007	1.56871	1.86177	2.34681	1.26944	1.45227	1.2017	0.854173	1.09006
21	2.97116	2.68472	1.473	0.280463	2.14418	2.26632	1.82738	1.69523	1.03234	0.850929	5.19355	2.62854	1.33304	1.02701	2.21792	2.7604	0.6827	0.357737	0.988583	1.81651	0.167365	2.33952	1.41025	0.914043	1.53105	1.93537	-0.513332	2.91091	1.13821	-0.697099	1.27141	0.981552	0.718446	1.36864	2.76138	2.28598	0.680739	0.989054	1.8976	1.0154	1.78125	2.33576	0.767387	1.30472	2.31228	2.58928	1.34535	0.452237	0.447018
22	2.59457	2.40125	1.18059	0.91021	3.28015	2.7507	3.22964	1.43171	1.78048	1.01433	3.09041	3.67142	1.02385	0.866969	2.51027	1.40321	0.8815	1.47012	1.14716	0.75045	0.732466	3.19106	1.58441	1.34951	2.23171	1.79732	0.842278	1.45487	1.34346	-0.217213	1.60721	1.71958	1.55877	1.9486	1.99196	1.96647	1.09924	0.727476	2.41145	0.448693	2.38918	1.43082	1.6663	1.50592	1.94432	2.61066	0.934361	0.920583	0.773288
23	2.72202	3.87337	1.42093	0.774783	1.74169	3.08399	1.72006	1.47938	1.67793	1.96663	4.95456	3.47846	1.24943	0.260098	2.64142	3.37612	1.83991	0.829457	1.80468	2.38897	1.09832	2.94532	2.60259	1.61009	1.79014	2.27871	-0.0924892	2.21314	1.80661	1.1736	0.632765	2.00076	1.64146	1.9899	2.68168	2.89251	1.06109	1.41126	1.82936	0.94526	1.83126	1.59471	2.17416	1.40883	-0.239125	2.37103	1.9	0.973649	0.0642533
24	3.59775	3.80792	1.66464	-0.448096	1.84218	2.82129	2.62712	2.13508	1.11149	0.70754	4.45003	4.3111	3.04255	-0.0993705	3.38961	3.14748	1.27992	0.597564	-0.316461	1.65422	0.31323	3.04847	1.90313	0.462946	2.35453	1.82883	1.89708	3.44777	2.17782	-0.164876	1.23306	2.86821	2.02668	0.509252	3.45558	0.484765	-1.12878	0.757417	2.50322	0.645065	2.97736	1.32663	1.4956	1.52927	1.22813	2.26037	2.78048	0.944914	0.715771
25	4.96875	4.01883	1.99143	1.56101	3.63877	3.3772	3.31248	2.45137	1.97746	2.46758	4.26298	5.53935	2.29593	1.16939	3.51402	2.2085	0.965892	1.4128	0.748462	2.22296	0.593867	3.36726	2.68911	0.796053	2.48578	2.39855	0.851969	1.82828	2.30162	-0.258695	1.25365	2.18048	2.05948	1.4384	2.30363	4.30015	0.521785	0.813163	1.0399	1.54227	2.57341	1.77189	2.01125	2.1893	2.01838	1.64833	2.29031	1.46917	1.69554
26	3.70537	4.76242	1.5626	0.540707	3.77688	4.47216	2.37541	2.29182	2.17068	1.56324	4.74836	5.11111	3.1862	1.1441	3.18353	2.31159	1.48006	1.24815	0.473028	2.69291	0.405458	2.68728	2.33505	1.59839	3.02412	1.57655	1.00394	2.84276	2.77527	-0.561722	1.50658	2.52516	2.60209	2.46322	2.87289	4.18732	0.726235	1.49501	1.99392	1.7853	3.60776	2.02827	1.76173	2.68048	1.1739	2.20595	2.1365	1.34127	0.937588
27	3.86752	5.27755	1.71247	0.477688	4.1231	4.3477	3.12492	1.88731	2.65071	2.40368	6.0585	5.58801	2.67613	1.74093	3.73733	3.18632	2.52315	2.10248	2.27506	1.78361	0.974908	3.61832	3.0821	1.59239	1.88788	1.73224	2.11058	3.84428	2.04575	-0.603016	1.6166	2.15093	0.83685	2.26251	4.26956	3.50607	0.72858	1.47372	2.16208	1.38274	3.20267	1.51098	1.6153	2.38723	2.036	2.9067	1.69666	2.62614	2.07151
28	4.98642	3.8333	2.17381	0.226259	3.12538	4.28311	3.78891	2.35388	2.14473	1.94165	5.56769	6.21109	1.69631	0.977488	4.54356	4.42459	2.34665	2.1838	2.51543	1.96108	1.10729	4.6293	2.45759	1.80322	3.16165	2.42002	1.25441	2.19368	3.29162	0.936612	1.95395	2.89708	2.07747	2.52223	2.92527	3.28989	1.57387	0.906174	2.11991	0.478187	3.67071	1.57597	2.2365	2.03896	2.3779	3.62655	1.89813	2.29141	1.45041
29	4.60124	5.58072	1.56314	-2.00254	3.88928	4.09598	3.96232	2.69131	1.2839	1.52345	5.43426	5.44857	2.5434	0.693364	5.19733	4.00788	2.63072	1.65969	3.09838	2.48948	1.36975	3.6317	2.68602	1.83406	1.58715	2.45882	2.56248	3.53102	2.68951	1.26804	1.97462	1.8571	2.87547	3.16307	2.55542	3.7494	0.922502	1.33543	2.60471	0.935718	2.11371	2.52985	1.38404	2.22131	2.50111	0.791589	1.8067	2.24975	1.595
30	5.19123	5.64945	2.47322	0.195721	2.12319	4.0751	4.1862	2.02165	1.84719	2.05273	5.95008	5.61272	2.95277	1.02474	3.4643	4.51981	2.0451	1.21486	2.45874	2.09183	0.16573	4.58821	2.24809	2.30486	1.30553	2.66308	2.07701	2.47826	1.89101	-0.527956	2.27511	1.15761	2.89114	2.4935	3.971	3.79569	0.878879	1.10049	1.20641	2.02467	2.5314	3.21697	1.63363	3.27455	2.34526	1.73801	2.28293	2.10767	2.66797
31	5.15327	5.37082	2.42999	0.938822	4.11499	4.05821	5.02903	2.65645	1.38711	2.09487	5.50841	5.5956	2.9261	1.66296	5.01195	4.20024	2.90151	2.21751	1.92673	2.25858	0.94316	4.87441	2.02534	2.12771	3.82811	2.41127	2.18393	4.30768	3.06801	-0.067835	1.99689	2.94237	3.17704	2.92367	3.37786	3.97381	0.325398	1.75209	1.62759	0.64725	3.37362	3.0387	1.99372	2.95679	4.0855	2.68195	2.83113	2.10316	1.78812
32	5.47547	5.6619	2.07054	0.339256	3.93424	4.05134	4.16014	3.10083	1.69637	1.01569	6.29427	5.61126	2.79214	2.0877	5.09218	4.30507	2.41558	2.01102	2.54124	2.25113	-0.771196	3.25659	2.27372	2.26091	0.330191	2.08708	1.77014	1.99436	3.48238	0.133788	0.978829	3.54518	1.741	2.55923	3.56276	3.79136	0.907829	1.08863	3.13766	1.77907	2.41532	3.10736	1.93018	2.44048	3.93446	2.69749	2.46988	2.42884	1.44117
33	4.95584	6.03669	1.37246	1.63256	3.73165	6.25732	3.05404	2.78988	2.74206	2.74111	4.96414	5.86522	3.01299	1.36039	4.97007	4.40211	3.22792	2.41841	2.04479	1.87949	0.0518397	4.55664	3.13485	3.29199	2.49033	2.16644	3.16439	4.92947	1.92563	-0.367819	1.84042	2.87831	1.93881	3.83278	4.0816	5.13669	0.572083	1.71448	2.97848	0.693186	1.93663	3.02133	2.49765	2.53063	2.03384	2.63783	2.27363	1.82677	1.95736
34	5.84602	6.49076	2.15681	0.941059	4.28439	4.08107	3.83775	2.34182	2.65216	1.9396	6.87489	5.27994	3.89834	0.850264	4.38006	4.76833	3.01546	3.0316	1.91167	3.22335	0.175226	5.79208	3.5485	1.73694	1.09965	2.75629	1.83001	3.05801	3.55355	0.547469	2.75896	3.20385	2.76534	2.87981	4.44994	4.36241	1.37947	0.282853	1.48999	1.52013	1.79236	2.49404	2.75226	2.32807	4.01053	3.10866	2.81684	1.93322	2.82063
35	5.82455	4.47261	0.991438	-0.309063	3.23831	5.02279	3.5161	2.26308	2.39916	1.5763	6.03495	6.45144	3.00866	0.837289	4.94092	4.62432	2.01618	2.14334	3.05884	2.07836	0.182029	5.52719	3.53203	2.60818	3.52737	3.33851	1.69138	2.76447	3.02468	1.5067	2.26027	2.32684	2.95282	3.14908	4.56136	4.18311	1.42208	0.411474	0.437569	1.04726	2.50734	2.96435	2.22889	2.49046	0.939025	2.63052	1.74119	1.95378	1.78353
36	5.61842	5.61412	2.07059	-0.1736	4.07657	5.63329	2.92434	3.34196	1.53254	1.43165	6.14548	5.64851	3.34857	1.69702	4.95926	5.47029	2.3742	2.1413	3.13147	1.83469	0.848304	5.2607	3.27612	3.12722	3.43895	3.18642	3.09862	4.33747	3.41399	-1.45294	1.86981	3.1884	3.43521	2.77392	2.78205	4.19581	0.834059	1.72344	1.39897	2.29159	2.73514	2.62291	4.52922	4.20478	3.75187	3.82933	2.7652	1.96049	2.51882
37	4.66876	6.4292	1.41672	0.26322	4.67527	5.45488	3.71077	3.33742	2.57705	2.37128	4.77328	6.16366	2.25887	2.63256	4.86691	3.95906	2.86833	2.5884	1.56087	3.19878	0.500723	4.86288	3.07322	3.25414	3.48338	2.54874	3.41515	3.63511	4.20786	0.960886	1.24947	2.54337	2.59432	2.83137	2.61296	4.00902	0.628436	1.8177	1.64723	1.71152	2.45429	3.17713	2.14275	2.83273	3.58302	2.32767	1.85004	1.45167	2.44866
38	6.85652	5.61305	2.50495	0.121811	4.11022	5.10922	4.67776	2.85602	2.47779	1.47626	5.72038	6.87773	3.73763	1.17301	4.59189	4.03832	3.22817	2.52021	3.80012	2.05493	1.24306	4.90921	3.52964	2.11566	3.36976	2.75359	2.29747	4.70457	3.23597	-0.622726	1.6717	1.92171	3.52476	3.17102	4.37643	4.68577	1.07883	0.826808	1.32619	1.8717	2.14488	3.39201	2.12563	3.14537	3.56767	3.98857	2.22784	2.10326	1.75373
39	5.35498	6.46907	2.70297	1.11746	4.61447	6.14439	4.53894	2.90398	2.35642	2.65329	6.44678	5.72367	3.20247	2.33124	4.30035	5.53778	3.12587	2.48382	2.11589	2.31229	1.57832	4.63494	3.1903	2.76603	2.4286	2.54378	2.54717	3.48686	2.8222	-1.02033	1.03956	1.41151	2.93198	3.24232	2.84039	5.23244	1.46005	1.44592	2.75758	1.40637	2.12434	2.58161	3.22098	3.114	3.37402	4.29125	1.70432	2.7083	2.20493
40	7.49206	6.24069	3.05558	-1.08873	3.91784	5.20464	4.03778	2.67348	2.87176	1.96283	6.23434	7.34566	4.28132	1.90638	4.46056	4.66526	1.94226	2.74549	2.40264	2.25722	-0.67405	4.99353	3.74428	3.71128	3.81788	2.72418	1.50681	3.19535	3.86071	1.68146	2.38021	2.96238	3.01449	2.52499	5.1816	4.6676	0.769151	0.634788	2.44799	1.6964	4.15495	2.7285	3.02543	3.51532	1.53063	2.9622	2.25975	1.81403	2.1139
41	6.57727	6.18948	2.52687	0.533684	5.18993	6.25903	4.39194	3.31522	2.20518	0.405258	5.2231	6.01796	2.99803	0.950226	6.08191	5.04489	3.42172	2.16377	3.94425	3.0083	0.0538809	5.63087	4.0133	2.79046	2.55989	2.84456	3.1615	3.12024	4.70196	0.450329	2.24966	2.97945	3.1522	3.20455	4.44193	5.10123	-0.494083	1.08386	2.21531	1.37393	2.42407	3.94625	2.67155	3.60773	4.24364	3.48901	2.6333	2.2078	1.90583
42	6.05535	6.04107	2.54895	0.64241	2.10833	5.8797	4.38588	3.1038	2.91145	1.71313	6.95171	8.16934	3.86342	2.52495	6.06159	4.44174	3.58543	3.3032	2.67086	2.30083	1.19604	5.36671	3.85832	2.60504	2.84462	3.56326	2.43173	3.88337	4.52876	0.313278	-0.053008	2.5088	3.77779	3.5905	3.46495	4.77312	0.793773	1.10347	1.04033	0.691225	3.10809	2.79865	1.32769	3.47943	4.43669	3.43057	1.66948	2.04942	3.21976
43	6.65513	6.4829	1.71964	0.33926	3.2643	4.83668	4.52785	3.30933	3.93074	1.5911	6.7969	6.35287	4.16073	1.74807	5.02218	5.28395	2.74005	2.41904	2.43556	2.27139	0.93901	5.51323	3.52283	2.47709	3.3208	2.96139	1.6939	2.035	2.89846	0.652835	2.11401	1.81761	2.89288	2.5204	4.23769	3.78827	1.5091	0.317021	1.29277	1.30935	3.0033	2.57488	2.98826	4.40557	3.21111	4.61789	3.18642	2.44229	2.83559
44	6.49877	6.28625	2.97032	-0.7258	3.13319	6.93107	4.22756	2.66028	2.30919	2.57013	6.37111	7.71297	3.09995	1.13816	5.1228	4.89982	3.76128	3.25298	2.10401	3.18694	0.687366	5.30824	2.74453	2.38985	3.12249	2.81998	1.78897	2.26548	3.78706	0.396025	1.87603	2.42158	3.75357	3.33257	4.18314	4.25339	0.947169	1.2927	2.62893	1.96004	2.44706	3.10127	3.27726	3.97177	4.33126	3.89428	3.24706	1.22029	2.21882
45	6.78995	6.00755	3.25992	-0.0225879	3.82354	7.43178	3.90064	2.32912	2.32225	2.33645	6.95413	5.97825	3.70533	2.12141	5.32742	4.79458	2.8433	3.32321	4.38324	3.75692	0.463374	4.27191	3.85303	2.00776	3.29248	3.8614	2.84157	3.98819	1.65541	-1.04639	1.05587	3.44073	2.84585	3.69577	4.39419	4.66331	0.146764	0.444586	2.67657	2.0354	2.86647	2.78399	2.1858	4.39104	3.23075	4.23839	1.90858	1.98503	2.5072
46	6.97254	6.87244	1.5905	-1.83535	4.71025	6.39162	4.60607	3.74306	3.0202	-0.48105	7.32813	7.43406	4.03443	1.93	3.65739	5.69718	2.87294	3.39115	4.13611	3.17531	2.13591	4.16134	3.48764	2.61812	2.12501	3.16533	2.02133	3.9638	3.51989	0.544053	1.84991	2.92451	3.58239	3.67534	4.02175	5.99692	1.27666	1.23613	2.77619	1.8704	2.16568	3.84089	1.46458	3.47021	4.9098	2.86056	1.56673	2.02776	2.34776
47	6.08492	7.1927	1.74777	0.454974	4.5064	7.92084	4.48897	1.88602	2.97314	0.965026	7.18942	7.5723	3.15758	0.370278	5.3427	3.87105	3.54858	3.639	2.24041	3.50175	0.751228	5.52732	4.03727	1.84291	2.14419	3.48995	2.48061	4.38931	3.12201	1.16723	1.88688	3.17979	4.21779	2.69894	3.95812	4.91528	0.646572	0.69975	1.45883	1.04011	3.0424	3.24926	1.79777	3.93772	2.93434	3.43603	2.64228	2.3542	2.01232
48	7.02046	7.37928	2.28579	0.736996	5.54266	6.11841	4.41523	3.53138	2.34497	1.25667	6.24815	6.3245	3.82182	1.6441	5.58424	5.04873	3.7379	2.92677	3.47714	2.12725	0.728924	5.29838	3.54121	2.53468	2.45851	2.09053	2.5527	3.05937	3.73688	0.850979	2.14468	2.63941	3.36724	3.52666	4.61997	4.37624	1.6939	0.544953	3.46459	0.963775	2.81933	3.50198	2.6942	3.9444	4.76081	4.03027	2.17791	2.93263	2.59365
49	6.46367	6.76203	3.4709	0.994798	4.54108	6.23165	4.64158	2.70297	2.57644	0.80119	6.24816	7.97202	2.88569	2.36793	6.36003	4.80061	3.39349	3.24039	3.35852	3.34221	1.12497	5.61524	3.74711	3.10025	4.00875	2.46542	2.80722	5.45038	3.78202	0.375023	1.34765	2.71343	3.31291	4.37294	4.99921	5.61082	1.40119	0.85307	3.42971	2.28637	1.3911	2.74839	2.66308	2.60366	4.43519	4.16785	1.88066	2.37437	2.54788
50	7.51494	7.4019	3.64459	1.16494	6.10597	6.018	4.09789	2.75306	2.96037	0.626584	6.61848	7.47654	3.57232	2.40418	5.24852	4.94374	4.24037	3.5632	4.45846	3.95722	2.23686	4.98338	3.26209	3.65418	3.64321	3.02529	2.07716	3.31914	3.51762	0.478492	0.848473	3.79009	3.3894	3.88416	3.79851	4.61418	0.570426	2.40073	3.6647	0.788031	1.77564	2.96075	3.02924	5.43587	4.72873	4.1725	2.50659	2.45557	3.0384
51	6.41799	6.19445	2.65439	1.08526	4.25652	6.61167	5.04126	3.447	4.15649	0.155206	7.18035	8.06845	4.15579	1.54723	6.29309	4.45602	3.78444	3.94259	2.32905	3.89199	1.24165	5.06601	3.63091	2.31356	3.16858	1.4625	2.35867	4.90009	3.50046	1.2694	2.99628	2.92818	2.65722	3.28447	4.85874	4.89285	1.51994	0.546783	2.19473	-0.241178	3.02896	3.63435	1.60223	3.97237	1.80577	3.78486	1.37302	2.36983	2.02897
52	6.54059	6.55372	3.50631	0.674248	5.96116	5.90242	3.98211	3.74572	2.97024	1.21039	6.49591	7.11442	3.63969	2.73478	6.73268	5.03045	3.80276	3.26863	3.67235	3.2562	1.0051	5.29166	3.89107	2.65227	2.66166	3.55793	3.33311	3.23658	2.85714	-0.358262	2.10893	3.1283	3.54727	3.32092	4.90269	4.99892	1.32973	1.11813	1.67122	2.19797	2.21969	1.69874	2.86586	3.6176	4.05058	4.5302	2.07175	1.20956	2.56148
53	6.16284	5.60275	3.12809	-0.932422	6.43146	6.86707	4.28799	2.37889	1.74363	1.42407	6.47827	8.26966	3.68112	2.5346	5.39741	3.00051	3.78379	3.38486	3.5343	2.40581	1.89219	3.8938	3.56989	2.51372	4.43625	3.23776	1.31397	3.85371	3.95357	0.813068	0.340638	3.49632	3.50379	3.14684	4.91626	4.43018	0.603688	1.25622	3.12264	2.30545	2.60867	2.67756	2.43872	4.5187	4.47753	3.95448	2.95607	3.10609	2.7699
54	6.63156	5.98801	2.90945	-0.54967	4.85343	6.3405	4.61538	3.75913	2.92217	1.39923	7.52653	8.19086	3.7043	2.04678	5.91693	4.49049	2.57144	3.18266	2.14915	3.09449	0.713562	5.12816	3.79477	3.18031	2.38452	2.84977	3.14188	3.95018	3.33818	0.821841	1.8615	2.12237	2.70627	3.47804	6.12758	4.92957	1.40446	1.37856	3.16542	1.17415	3.52993	2.90387	2.43804	2.34872	4.9112	3.74457	2.92158	2.29368	3.26558
55	3.80799	6.06118	3.44239	2.0874	5.34359	6.35342	3.9473	3.32454	3.20219	2.31657	7.56256	7.08155	3.68652	2.61456	6.42167	5.03831	3.86638	3.20266	3.31729	3.7287	0.574955	4.97197	3.15178	3.39359	2.9061	2.89499	1.23985	3.46892	4.07309	0.873017	0.59274	3.71328	3.50659	2.80144	4.4455	4.04608	1.33232	0.675711	2.86305	2.35995	2.33651	2.96354	2.54873	2.86118	3.87839	4.35787	2.35382	1.94647	2.17465
56	6.92967	6.67189	2.24313	0.0401375	7.42413	7.0225	3.5452	2.99221	1.98181	0.496555	7.48835	7.49148	3.12584	2.30223	5.7815	4.57863	4.67856	2.83322	3.51732	2.85228	2.04986	5.83272	3.06191	1.7331	2.79705	3.46917	2.04095	3.20311	3.44856	0.362882	0.63214	2.62179	2.73534	3.9833	4.49713	5.28722	1.68526	0.620019	3.43225	2.1319	2.50847	1.65369	1.95091	4.99542	3.03396	4.40823	2.72698	2.45064	3.0203
57	6.66666	7.27842	3.86362	0.712105	6.08398	6.44216	3.85622	2.42493	3.26826	2.48075	7.27684	8.45981	3.0652	2.11376	5.55772	6.19354	2.64097	3.30362	3.82135	3.79767	0.905595	5.45008	3.38487	3.06113	3.16359	2.72915	1.49658	3.05381	2.39336	-0.152192	1.36237	3.22785	3.20507	3.17335	4.63985	5.05521	1.27759	2.0677	2.39638	1.21865	2.62615	2.78081	3.2524	3.18111	3.23856	2.81819	3.73695	2.13819	4.14826
58	6.87992	5.86111	3.8332	-0.850783	5.25542	6.15414	4.79356	2.74613	3.54351	1.79432	7.69668	7.33508	3.26055	2.195	5.64969	6.23535	4.28925	3.38003	4.42184	3.83596	0.577259	5.39344	4.31891	2.27237	2.46307	3.22765	2.75109	2.20953	3.84972	0.774787	1.80776	2.13926	2.6877	4.46302	3.82976	3.35335	0.064601	1.87972	2.50399	1.36019	2.83855	1.22979	1.88146	3.6721	4.09957	3.12912	1.90566	2.43907	3.27126
59	7.15713	7.20122	3.33786	-0.618862	4.35914	6.70232	4.05319	3.15189	2.81524	1.18008	7.65677	8.10939	3.46045	2.67015	5.83758	4.65779	3.91429	3.43314	4.2831	3.63054	1.61674	5.62727	3.58854	2.91911	2.97126	2.41112	3.87658	2.4712	4.2555	-0.188917	1.56478	3.81629	3.8241	3.79206	6.29376	5.14233	0.859877	2.36615	1.56913	0.173204	3.09627	2.80941	1.99628	5.16235	2.43936	3.96353	1.56269	2.80252	2.48922
60	5.14992	6.7277	3.45432	0.330706	5.15732	6.98259	4.07113	2.87936	2.60315	1.16682	6.57366	8.02467	3.49625	2.06902	5.03427	5.42425	3.99215	2.66001	3.04747	4.01854	1.03815	4.59426	2.94382	2.88529	2.91147	2.65147	2.55058	3.59927	3.07753	-0.248987	2.73056	2.89372	3.3842	4.00123	4.96842	4.2361	0.711618	1.64669	3.71572	2.69905	2.47304	3.03191	1.7474	5.18054	4.30892	3.35469	2.66957	2.94354	2.67755
61	6.72452	6.26292	4.81179	-0.266701	5.73518	7.59126	5.20459	3.35329	3.88796	0.479368	7.24676	7.79612	3.94104	2.87593	6.40878	6.21892	4.19447	4.04424	3.74113	4.0121	2.00724	4.95475	3.95065	4.05765	1.98055	2.55388	2.27857	4.09519	3.38431	0.698807	1.87559	2.57116	3.39054	3.56429	3.90523	4.51105	1.50145	1.10507	3.36149	1.3743	1.87775	2.98252	1.68086	3.24197	3.18213	3.04214	1.82277	1.26787	3.00061
62	7.46813	6.12025	3.99002	0.334708	7.89817	6.64313	4.48844	3.1426	3.17773	-0.33934	6.76567	7.08772	3.38418	2.48801	5.73229	4.91958	3.96518	2.98048	3.6979	4.30404	2.14789	3.96917	2.66667	4.18088	3.90823	3.38083	1.31819	4.19089	2.45699	0.393343	1.83169	3.24427	2.78426	3.56712	4.23975	3.68276	0.588018	2.05071	2.38242	2.07103	3.01788	3.71996	1.68952	3.47236	3.00887	4.80637	2.42108	2.42374	3.17921
63	5.87935	6.18592	3.84746	-0.286382	4.61431	6.80223	4.72819	3.80975	2.03167	-0.39156	7.16432	9.0427	3.53718	0.572224	5.45809	5.00961	4.03747	3.71731	3.29912	3.72285	0.725707	5.12635	3.9548	2.81856	3.06456	2.12821	2.30692	3.43969	2.11204	0.556211	1.8648	2.55369	4.00264	3.12274	5.15268	4.61327	1.05868	1.65805	2.81032	1.9717	2.95777	2.9765	2.31976	4.6261	3.08889	4.44883	1.31182	2.12192	2.61327
64	6.51936	5.81712	4.07014	0.512047	5.68439	7.39555	4.1539	2.92681	3.00056	0.992893	6.07758	8.34561	4.73208	2.91232	6.07862	4.77862	2.40635	2.58353	3.05798	5.34546	0.453722	4.55802	4.09971	3.89592	2.67412	3.33781	2.1474	4.3573	3.56451	1.67063	2.09502	2.79359	3.09636	3.93501	5.06908	5.731	1.35808	0.803305	4.02572	0.946165	2.27503	3.14957	2.07784	5.66709	1.44268	4.05578	1.90101	3.11764	3.487
65	5.29669	5.34179	2.9784	-0.629806	7.11292	6.68899	4.62333	2.1216	3.13042	1.05188	6.18276	7.55089	2.97503	1.7427	5.91433	4.11516	3.12277	3.4047	3.58566	3.60857	0.220312	4.62832	3.38841	4.16898	3.6523	3.15269	3.40869	2.88094	3.46484	0.302893	2.28114	2.09293	2.49758	3.71318	3.54327	4.4574	1.19448	1.28074	3.14958	-0.317865	2.58655	2.58184	2.41431	4.65519	3.76431	3.52247	2.28216	1.82386	3.4801
66	6.79584	7.07897	3.43998	0.405458	5.73482	5.87454	5.30448	3.48061	3.48204	1.04126	7.06872	9.09056	3.85916	2.38237	5.29186	5.2033	4.02235	2.75084	3.52126	2.80509	1.46017	4.94356	3.57321	3.06518	3.14649	2.6887	2.33597	3.55002	3.24721	-0.484377	1.86755	1.10807	2.95859	3.24379	6.12674	5.4957	0.0317865	1.25783	1.61051	0.612789	2.58829	2.3466	2.31613	4.46551	4.21356	5.15246	1.89567	3.2241	2.6026
67	5.35017	5.9669	3.92355	0.676106	5.96284	6.46768	3.5465	1.90014	2.15668	1.17348	6.92261	8.13462	3.63866	1.25814	5.76007	5.93458	3.88837	4.7907	4.23237	4.08876	1.46388	3.59672	4.10293	3.16555	2.49967	3.71996	2.85363	3.49312	3.87001	0.47662	2.37744	2.58508	3.4073	4.13882	4.80663	5.6723	1.0308	1.43011	2.44612	1.26128	3.03972	3.34714	2.16595	4.94405	3.45056	3.78566	3.06587	2.05726	3.95059
68	6.78485	5.68862	3.636	-0.595059	6.87375	6.55891	4.19664	2.42038	3.34765	1.98654	7.31791	8.69392	4.11472	1.76261	5.08881	5.18392	4.52458	2.815	5.1702	3.29977	1.77705	4.4282	2.82456	2.93752	3.50602	2.91116	2.45192	3.82544	5.13585	-0.512249	1.75074	2.92568	2.79523	3.81903	4.24074	5.27448	-0.0984135	1.32296	2.59262	1.11862	1.90871	3.08311	1.02491	3.91851	3.54694	3.76085	1.71424	2.2788	3.466
69	7.23685	5.39478	3.43226	-0.25428	5.32534	7.66059	3.39225	3.10635	1.29633	1.60663	7.53425	7.50515	3.5992	1.84126	6.42202	5.54349	3.9465	3.6896	4.47446	4.25016	0.87632	5.90004	3.15893	3.83674	3.83698	2.63475	2.70934	3.92283	3.26481	0.46809	0.1977	1.93483	3.21674	3.02043	4.60745	4.40951	1.33005	1.62222	1.97275	1.81128	2.12813	2.48455	2.53772	3.74257	3.18472	3.46912	2.9647	2.96798	2.40986
70	5.98487	6.01524	3.44878	0.368758	6.64535	7.17635	4.34237	3.46205	3.42525	0.312676	7.53639	7.57897	3.52524	2.25654	5.37474	5.4087	4.51555	3.24801	1.89278	3.3748	0.358501	6.0791	3.23474	3.66517	3.10997	3.0695	3.69118	4.57954	4.06994	1.03328	2.42989	2.58512	3.34125	3.1513	4.59193	5.30969	1.06216	1.74947	1.61684	0.433994	2.57525	3.37102	0.786821	4.58007	2.79631	4.33415	2.06206	3.16757	4.09872
71	6.55243	6.98703	3.25487	-1.42444	5.18773	7.31517	3.60699	2.60167	2.9009	0.0110688	6.32608	6.40243	3.60794	2.17691	5.34198	6.31072	4.94478	3.90191	3.4715	3.95938	1.93427	5.30726	3.09592	3.36828	3.76311	2.8562	3.00472	3.7967	4.661	0.183521	1.80229	2.76986	2.65997	4.29962	4.57493	4.29612	0.308572	0.974826	3.10914	1.2355	3.0262	3.0243	1.4021	3.07475	5.59595	3.34248	2.28625	2.23452	4.07629
72	6.00079	6.10385	2.33336	-0.197391	4.72881	6.49999	4.704	2.51008	2.21848	1.87195	7.32448	9.22209	4.1266	2.97738	6.20172	6.92223	4.11367	3.33499	2.79851	3.56158	1.51563	5.35144	3.31866	3.10419	3.60084	3.07746	3.16796	4.00811	3.31927	0.438379	1.73014	3.1109	2.65734	4.08513	5.95602	4.87267	1.21437	1.53636	2.89727	2.70592	3.35169	4.15196	0.935506	4.21352	4.77319	3.29776	1.16117	1.44426	2.52623
73	4.87774	6.49645	3.99669	-1.01019	6.84056	7.11732	4.59631	2.79782	3.0314	1.73925	7.20755	7.53193	3.68318	1.94529	5.06969	6.17936	4.39663	4.78782	3.41692	3.88317	1.29316	5.38998	4.1197	3.26613	3.1379	2.79774	3.5361	3.12815	3.81033	-0.688578	2.42611	2.79174	3.24084	3.79603	5.27606	5.10372	1.45163	1.9572	2.9854	1.29534	1.89067	1.48595	2.8509	2.51284	4.44794	3.57084	1.85026	2.41184	3.64824
74	6.83788	7.12716	3.3629	-0.58794	6.61096	7.86162	3.106	3.46875	2.85132	1.37298	8.06058	7.40428	4.18944	2.23448	5.25314	6.4414	4.59923	3.34121	4.29407	3.72821	0.50622	5.20031	3.13422	2.82247	2.92919	3.61043	2.71109	3.54269	3.98516	0.332341	2.03375	2.70115	3.14921	3.50143	5.30141	4.11539	1.41239	1.67627	3.01196	2.18986	1.95247	2.43402	2.41377	3.61512	3.52175	3.52216	2.03676	2.68268	2.9686
75	4.85083	4.96585	3.42147	-0.712769	5.86159	7.55614	4.17234	2.98018	2.47414	1.41731	7.99248	7.90981	3.33377	2.7613	4.51744	4.40745	3.49664	3.10449	4.22159	3.41872	1.53081	4.94069	3.57811	2.9707	2.56243	3.75312	2.98192	4.59946	3.35144	1.54413	2.46089	2.31668	3.597	4.31725	5.15131	4.39693	1.0415	1.2213	2.38186	1.18971	2.7551	2.81788	1.81857	3.10846	4.04937	4.26953	1.55044	2.26575	2.82343
76	5.66426	5.98688	2.88701	-0.376447	5.38416	8.59007	3.68982	3.22658	2.79057	0.557128	7.92144	7.80559	4.08067	2.23285	6.36163	5.09085	3.89818	4.02757	2.87064	4.80548	0.457397	4.04368	3.49798	3.21588	3.79322	2.3585	2.29142	3.33859	4.07013	-0.544401	1.99474	1.50528	3.87768	3.57736	5.44498	4.06401	1.44215	2.32626	2.13489	1.3435	2.5953	3.02813	1.99099	4.87502	2.63302	3.78528	2.19792	1.44693	3.54358
77	6.84407	5.06153	2.65829	-0.623869	5.95548	7.55362	4.26322	2.44023	2.77691	0.244125	7.62588	8.09917	4.67868	0.885577	5.57764	6.68647	3.25922	3.43857	3.99673	4.27261	0.805573	5.05948	3.59907	3.29441	2.8509	2.73357	1.39974	4.48122	2.47669	-0.00300527	1.9592	3.13612	3.33754	4.11051	4.02659	4.67298	1.14318	0.213702	1.93123	1.48327	1.74964	3.03278	1.91851	2.81288	4.89326	4.04031	1.77269	2.69955	3.97414
78	6.5149	6.04459	4.17411	0.425568	4.92144	8.44275	4.09014	3.37897	2.94573	0.972519	8.62015	9.37777	4.65643	1.46012	6.21839	5.43661	4.59767	4.53965	3.63815	4.7816	0.897181	5.50859	4.23212	3.15821	3.72336	3.43462	3.87376	5.33924	3.26348	0.266353	1.46154	2.24788	2.88698	3.45168	4.60952	4.93038	1.04783	2.32158	1.50104	2.68435	2.3986	3.14567	1.61697	4.16862	3.44963	4.48938	1.91933	2.96605	2.39978
79	5.86408	5.194	3.91866	0.296808	6.00542	6.98982	3.17821	3.48531	3.03031	1.44268	8.03861	7.49214	2.64378	2.36233	6.12741	5.06771	4.30634	4.26908	2.71067	4.64629	1.2699	5.29918	4.05486	2.55569	2.11032	3.54884	2.74418	3.62213	2.78568	1.38732	1.28606	3.17178	3.66842	4.06907	5.95025	4.93933	1.29944	1.87198	3.59885	0.669	3.34442	3.10979	1.2985	4.5548	3.3064	3.35012	2.25974	2.08377	3.3259
80	5.91796	6.77884	4.32969	-0.578302	5.8616	8.35113	4.01425	3.36443	2.29436	1.64492	9.376	8.61639	4.48956	2.59093	5.50711	6.45875	3.16093	3.95923	4.35268	4.31102	1.86086	4.14338	2.89627	2.29991	1.90701	3.0139	3.54602	4.56116	3.75767	0.312312	1.99934	2.35423	2.07433	4.08146	3.70315	5.46626	1.65738	1.3647	3.78096	2.63051	2.62292	3.63152	2.67919	4.45285	4.40544	4.34815	1.6547	3.49538	3.32525
81	5.10602	5.59908	3.9153	0.0257409	6.77444	7.08711	3.67883	3.66709	3.14661	2.13464	8.30234	8.2458	3.646	1.67186	5.26414	3.85329	3.94498	4.98147	4.1986	4.47361	1.84255	3.91853	3.23293	3.41513	2.06842	3.06951	2.21969	3.12654	3.51376	-0.100012	1.62306	2.99633	2.86769	3.48904	4.98841	5.18014	1.46641	0.546366	1.95973	2.03634	2.51071	3.20261	1.81643	3.81657	4.05812	5.24415	2.34604	2.69425	4.0866
82	4.85151	5.27339	4.23388	-1.37953	5.00757	9.27318	3.61618	2.51596	3.11184	0.465632	8.57583	8.32859	3.81122	1.02848	6.24009	4.36045	4.13567	4.46998	3.26933	3.71673	1.03403	5.58174	3.33127	2.65968	3.50865	3.43484	3.00112	3.93282	2.74894	-0.0741717	2.16897	2.95247	2.79761	4.05558	5.1102	4.47228	1.02381	2.49015	2.38343	0.911436	2.46659	2.50889	1.69128	4.39151	3.89651	4.21359	1.95733	1.75425	4.02892
83	4.9368	5.65664	3.98018	0.290314	4.80301	6.70027	2.85808	3.51924	2.91482	2.16751	7.18263	7.65214	4.03386	1.97454	6.01611	5.45366	4.04064	4.65911	3.68481	4.11753	2.02491	4.46009	3.48919	3.27001	2.29247	1.54193	2.60712	3.97552	4.45748	-0.116662	2.02658	1.85768	3.69506	3.87586	5.73185	5.18996	1.70381	1.57424	2.39242	0.537259	3.532	2.47452	1.29628	4.20633	4.01862	2.62573	2.13842	2.6358	4.22015
84	6.27269	5.21091	4.7353	0.0763628	5.88942	6.24151	4.09628	2.39404	3.41542	2.62578	7.98584	7.99551	3.3012	2.43348	6.07711	5.92438	3.46887	4.20953	3.73338	5.04575	0.685115	4.92158	3.73423	2.94977	2.25289	3.72319	1.26621	2.98622	2.71756	1.00428	1.23097	3.13673	2.67781	3.15527	4.83334	3.53998	1.46384	2.28975	2.84442	1.71029	2.08157	1.8684	1.70629	5.83264	3.27344	3.66139	1.8251	2.20688	3.92642
85	6.67326	5.15385	3.73608	-0.66071	6.18552	6.59788	3.77794	2.15904	2.46132	1.64454	7.5402	8.11433	3.81012	1.94101	6.28708	4.60691	4.01381	3.49599	4.45712	3.87302	1.32962	5.08892	3.26279	2.95294	3.91011	2.78087	2.81586	4.70654	3.83644	-0.801105	2.35318	3.21817	2.87505	2.91952	5.3524	4.24603	1.22806	0.703372	2.72031	2.52617	3.16232	2.90084	1.20091	5.0309	4.06663	3.73286	2.62026	2.0379	4.0602
86	4.99682	5.40551	4.00856	0.15381	6.89249	7.4677	3.46975	2.66575	2.64681	0.667517	7.69093	7.81438	3.59974	1.61482	4.72395	5.5971	4.40682	4.12999	4.95852	4.79282	-0.26741	4.49178	3.67375	2.7385	4.07249	3.75559	2.51289	4.13176	1.91543	0.00409394	1.90443	1.94075	3.39339	3.96419	5.68579	4.67983	1.12444	1.28854	1.85977	1.22652	2.57687	1.97678	2.32671	4.03074	5.09353	3.52472	1.7072	2.30214	2.67097
87	5.10132	5.33495	4.35937	0.821097	5.7756	7.64897	3.87213	3.58031	2.74398	1.08176	8.07969	7.32053	4.34835	2.03648	6.37685	4.62105	3.5905	4.08843	3.20998	4.33049	1.40187	4.2432	4.37929	2.52977	2.88659	3.98134	1.96942	3.25196	3.12979	0.0751514	2.07493	2.24596	2.83275	3.46233	4.43175	4.75417	1.63327	1.78828	3.00528	2.45157	2.34821	2.08409	1.90239	4.61483	4.02733	2.91025	1.24126	2.23646	3.40095
88	5.46261	6.06218	4.63284	-0.110466	5.62918	7.22256	3.68039	3.25443	2.59659	0.936462	6.98102	7.43577	4.20704	1.30884	5.83106	4.66613	3.13355	4.20398	3.46867	3.80143	1.63245	5.16719	3.75456	2.62905	2.43974	2.33736	3.34594	2.60902	4.06331	0.0300396	2.88087	2.94162	3.31909	4.18563	5.01192	4.8805	1.82542	1.34639	4.62317	1.84874	1.86612	2.29339	1.36156	3.99937	4.24172	3.16088	1.94569	2.37335	4.24421
89	5.42828	5.15836	4.35027	-0.209443	4.78298	7.55117	4.18649	2.51533	2.97296	1.49651	8.0116	6.09799	4.2827	3.13278	6.62403	4.86588	4.64896	3.98847	2.81223	4.07558	0.604753	5.82955	3.5151	2.42081	2.10447	3.47525	1.36372	4.94586	3.76818	0.412662	1.79001	2.25308	3.05326	3.50055	4.97979	5.31589	0.703947	0.99516	2.56089	1.61761	0.962493	2.41971	1.6745	4.66388	3.84536	3.29618	1.54927	2.28619	4.12493
90	5.88128	5.49065	3.47994	0.062402	5.75932	7.15257	3.53268	3.24688	3.35889	2.83015	7.7343	8.11241	4.73871	2.24177	5.40771	5.33065	4.51212	4.63009	2.88037	4.31491	2.46148	4.9083	3.41359	2.15414	3.29837	2.48386	3.06298	4.45912	4.33287	0.71769	0.852388	1.63654	2.50859	3.67685	3.94653	4.7197	0.442182	1.05296	2.76157	2.10571	1.99222	2.52798	1.44922	4.31424	2.66758	4.14315	1.49866	2.27732	3.01088
91	6.05958	5.67747	4.6543	-0.973718	5.29771	6.57261	3.40255	3.7866	2.28762	0.853419	8.86189	8.46655	3.8936	1.49678	5.64963	5.55878	4.82847	3.04975	2.20218	4.80126	0.906337	4.73332	3.61915	2.50853	2.63228	2.63706	2.27501	4.32068	3.19136	1.16676	2.40602	2.28066	3.38815	3.15437	3.93611	5.15905	1.09017	1.74689	2.76945	0.891983	1.34739	2.79236	1.00554	3.48279	2.77315	2.8389	1.5674	2.41094	4.29551
[truncated: 170 more columns]

## Sheet: Fig 2B
Source Data	Figure 2A	AWC VGLUT-pH Data: df/dt of individual dF/F(%) traces
		Three trials per animal: Read from left to right; Trial 1 signifies a new animal
		Acquisition Rate: 5 Frames/sec
		Stimulus OFF:	Frame 10
Frame / Trial #	1	2	3	1	2	3	1	2	3	1	2	3	1	2	3	1	2	3	1	2	3	1	2	3	1	2	3	1	2	3	1	2	3	1	2	3	1	2	2	3	1	2	3	1	2	3	1	2	3
1	-0.188704	0.976664	0.501599	0.319866	0.244695	0.647388	0.165428	-0.0138205	0.248107	-0.157445	-0.579727	0.477213	-0.75409	-0.0169319	0.108404	0.0991089	-0.735033	0.656361	-0.0513155	0.0435923	-0.934959	-0.0629532	-0.0891333	0.556265	1.27895	0.886399	-0.375968	-0.44509	-0.232109	-0.0447262	0.0230072	-0.407421	-0.941956	0.438009	-0.43978	-0.224009	0.0831299	0.161686	0.656541	0.60872	-0.0599745	0.204185	-0.168039	0.0316668	-0.568043	0.761778	0.454148	-0.2015	-0.335106
2	-0.379982	0.419567	0.24381	0.439711	-0.301797	0.390014	0.156314	-0.171738	-0.0649641	0.0143461	-0.245458	-0.509751	-0.0851668	-0.114149	0.155052	-0.195169	-0.280808	0.351952	0.0464798	-0.228433	0.157917	-0.201553	0.308023	0.380651	0.0781771	-0.0343773	-0.0504702	-0.0618239	0.308658	-0.36886	-0.123262	-0.520754	-0.167171	0.434775	-0.247947	0.000146711	-0.195256	0.477848	0.610863	0.916701	0.0196073	-0.0459953	0.016096	-0.288833	-0.0868717	0.706178	0.34872	-0.553626	0.0875121
3	-0.0746916	0.0843797	-0.319288	0.631465	-0.056818	0.456565	-0.248992	0.469286	0.0953187	0.101422	-0.093674	0.107887	-0.108137	0.0635247	0.110542	0.0653302	0.0370528	-0.074665	0.249575	0.607695	0.263062	-0.375941	0.193714	-0.0827503	0.198171	0.185487	0.160156	0.0266065	0.532709	0.172013	0.207885	0.219862	0.221058	-0.295566	-0.0131927	-0.32407	-0.282576	-0.0251028	0.506238	-0.0988209	0.244446	0.158881	-0.43923	-0.0221187	0.147453	-0.520545	-0.0918286	-0.298284	-0.185824
4	-0.405257	-0.234956	-0.0869238	0.576318	-0.0907328	0.253575	-0.0468257	0.2431	-0.102552	0.408801	-0.287499	-0.628922	0.528977	-0.337499	-0.369681	0.039604	0.121606	-0.0510851	0.0135218	-0.566752	0.0832875	-0.0303079	0.0721612	0.219336	-0.330123	-1.5542	-0.0335243	0.0395548	0.0582208	0.108371	-0.074788	0.409969	0.491379	0.630936	-0.198081	0.671711	0.112485	0.192052	0.355856	0.15595	-0.318632	0.0162901	0.25518	0.231233	0.132847	0.522541	0.223388	0.0660053	0.0250249
5	-0.0471237	0.00541191	-0.220932	0.0533557	0.468771	0.0630965	-0.31323	0.0349869	0.501119	0.16988	0.530241	0.298788	0.0693307	0.111242	-0.251373	0.129096	-0.173396	0.0735479	0.349679	0.338897	-0.421	-0.142541	-0.0693805	-0.0305733	-0.0748215	0.0873096	-0.320891	-0.442881	-0.493877	0.282286	-0.144328	0.631594	-0.032088	-0.346651	0.0683445	0.392874	0.122781	-0.325693	-0.287535	-0.514838	-0.340293	0.286336	-0.248536	0.218861	-0.511506	-0.382705	-0.49155	0.437443	-0.2289
6	0.108842	-0.170279	0.236963	-0.445303	0.151727	-0.00469642	0.382292	-0.522982	0.0265683	-0.679843	0.0800716	-0.467313	0.425712	-0.23487	-0.079227	-0.161457	-0.377582	0.0611993	0.361567	-0.328744	0.0904351	0.2078	-0.0388686	-0.0550126	-0.288258	0.180299	0.441621	-0.169824	0.183443	-0.175675	-0.543537	-0.0180297	-0.00644227	-0.278219	0.0959126	0.606517	0.11059	-0.239793	-0.226782	0.210604	0.135738	-0.272806	-0.0797979	0.0451902	-0.438977	0.526896	-0.407787	0.198212	0.276271
7	0.322144	0.260063	0.27218	-0.671897	0.100707	-0.397455	0.30623	-0.365425	-0.267586	-0.245936	0.389851	0.532745	-0.0169951	0.349499	0.534755	0.142109	0.109611	0.105835	0.141959	-0.186755	-0.245395	0.121018	0.105928	-0.370265	-0.183938	0.521784	0.390755	0.226886	0.18208	-0.153841	-0.0263088	-0.186563	-0.225129	-0.211271	0.0525238	-0.516016	-0.0280627	0.163484	-0.667357	0.157328	0.131272	0.0222914	0.0873938	0.0717223	-0.290486	-0.493715	-0.171688	-0.142791	0.0418916
8	0.0998941	0.0894492	-0.106824	-0.373867	0.00173519	-0.109977	0.125631	0.17026	-0.285354	0.0703087	-0.761098	0.0861731	-0.261496	0.00316948	0.085375	0.0847035	0.30837	-0.16938	0.115826	-0.498617	0.0457726	0.199385	-0.231474	-0.425485	0.132611	-0.202121	0.177598	0.616526	0.0513995	-0.508473	0.00017543	-0.224511	-0.323164	0.0335927	0.148904	-0.110714	-0.190913	-0.0890467	-0.17765	-0.180218	0.296872	-0.198446	0.200038	0.153757	0.739089	-0.0750875	-0.01446	0.0990348	0.0304482
9	0.177096	-0.293985	-0.0534041	0.50932	0.19708	-0.444309	-0.0998624	0.146338	-0.274121	0.254784	-0.0546003	-0.0523475	-0.148455	0.172775	0.00262307	0.358351	0.323821	0.232842	-0.212551	0.17711	0.00576925	0.00298063	0.0494169	-0.0583511	-0.656459	-0.329447	-0.274746	-0.0725288	-0.0717692	0.156439	-0.0743724	-0.303104	0.24659	0.20636	0.027228	-0.186913	-0.060492	-0.0283275	-0.222752	0.288073	0.115995	0.236121	0.437669	-0.0769233	0.38987	-0.00406132	0.231804	0.0326012	-0.107312
10	0.059597	0.10009	-0.125034	0.475037	0.518696	-0.185375	-0.157877	0.0506767	0.726799	0.0358063	0.275216	-0.72777	-0.212247	0.142177	-0.272652	-0.161452	0.0701735	0.0859239	-0.03835	0.395116	0.0878376	-0.0226245	-0.137856	-0.0058619	-0.0821948	-0.430826	-0.26087	-0.369944	-0.908019	0.336699	0.122286	0.323579	-0.0720159	0.240432	0.269981	-0.0350526	0.0516524	-0.555974	0.722121	0.304046	-0.245483	-0.0446864	-0.0201997	-0.0773431	-0.126128	0.171722	-0.0671946	0.177204	-0.023377
11	0.376168	0.069546	0.251998	-0.271707	-0.0695493	0.0121348	0.0686734	-0.0107232	-0.096927	-0.0425281	0.658488	0.0460314	0.014473	0.169246	0.392347	0.43276	0.0967671	0.00551926	-0.316099	0.0639636	0.0286392	0.292786	-0.253593	0.433256	0.118481	0.15207	0.435249	-0.471342	0.0502813	0.582549	0.293022	0.278269	0.517391	0.0894965	-0.165817	-0.0341883	0.20697	-0.268506	0.490002	0.701967	-0.00263603	0.101504	0.267424	-0.186603	-0.0811557	0.503572	0.576889	0.0483971	-0.0806281
12	0.0525036	0.522304	0.0641237	-0.554602	-0.113624	0.786717	0.0493119	0.274323	0.357483	0.325802	0.546422	0.579693	0.350466	0.374943	-0.22455	-0.144112	-0.27204	-0.049709	0.620049	-0.12259	0.516677	0.514294	0.596082	0.0357067	1.03483	0.410302	-0.167549	0.427253	0.0310926	0.201047	0.426203	0.386318	0.0719772	0.316192	0.29111	0.121237	0.0909077	0.345624	0.456913	0.387726	0.0697823	0.128451	0.145344	0.146083	0.20138	-0.0903426	0.114147	0.528151	0.21781
13	0.463552	0.0785528	0.182381	-0.744083	-0.259986	0.761761	-0.00507478	0.436033	-0.109718	0.856034	0.392794	0.850188	-0.0274312	-0.116225	0.511337	0.334493	-0.0427084	0.215481	0.22162	0.176682	0.35231	0.551516	0.199728	0.164806	0.484838	0.219635	-0.184044	0.307749	0.871683	-0.583941	0.0845789	0.013199	0.464682	0.19102	0.414488	0.678701	-0.1068	0.850728	-0.199649	-0.336415	0.589615	0.388054	0.162049	-0.0138774	0.294534	0.22729	0.316707	0.187203	0.233179
14	0.619275	0.112691	-0.037635	1.07293	0.4812	0.73268	0.54723	0.0554332	0.255718	-0.0054707	-0.0437621	0.677813	0.141471	-0.031419	0.365591	-0.227853	-0.192755	0.590002	0.215431	0.419032	-0.15929	-0.28758	0.52857	-0.0672219	0.617344	0.223085	-0.346246	0.354528	0.282177	-0.163267	0.165865	0.0743869	0.158527	0.178501	0.612709	0.227833	0.0189209	0.203874	0.035248	-0.469604	0.519274	0.556014	-0.322951	0.32824	0.065638	-0.19783	-0.0396893	-0.367198	0.0464808
15	0.233111	0.360796	0.337891	0.153917	0.438253	0.00702792	0.202403	0.525301	-0.291062	-0.0238296	0.0458565	0.34269	0.0191254	-0.166362	0.608257	0.374888	0.508218	0.197751	-0.538382	0.147135	-0.125093	-0.148438	-0.302502	0.304621	-0.243565	0.118025	0.631745	-0.214809	0.433418	-0.50233	-0.116104	0.0194055	-0.0223728	-0.0549514	0.259235	0.353646	-0.118598	0.0557429	-0.082284	-0.360751	-0.0799178	-0.00515375	-0.347014	0.581025	0.0543957	0.00323544	0.107046	-0.175738	0.184437
16	0.180995	0.34179	0.0732701	0.140391	0.393544	-0.129692	0.571107	-0.299509	0.0152382	-0.339808	0.034512	0.353236	0.400452	0.0258201	0.320691	0.122934	0.0983698	-0.0615532	0.741582	-0.525012	-0.289973	0.206381	0.27357	-0.189914	-0.0346238	0.241124	0.462816	0.0944568	0.390766	0.441575	-0.113102	0.00978419	-0.262521	0.060648	-0.373738	0.264722	0.147055	-0.31727	0.545896	0.180732	0.0411308	0.0580781	0.120246	0.0847973	0.390124	0.279116	0.359284	-0.110341	0.0801706
17	-0.436339	-0.476947	0.731868	-0.179033	-0.0963159	-0.311495	0.268541	0.28023	0.20341	0.411991	0.599481	0.198774	0.819546	0.149981	-0.0050113	0.600052	0.262222	-0.367044	0.296344	0.641315	0.472624	0.699718	0.342965	0.289953	-0.0963564	0.030853	0.821674	0.414291	0.41628	0.570275	-0.0690988	0.189356	0.161947	0.0296956	-0.417395	0.20607	0.436566	0.370138	0.327805	0.422617	-0.174017	0.129427	0.313698	0.254338	-0.317719	0.376927	0.0445558	0.335255	0.106293
18	0.404629	0.193378	0.0429923	0.167398	0.0875157	-0.0313014	0.395238	-0.315686	0.514054	-0.0323277	0.82409	-0.00599566	-0.127874	-0.275987	0.283434	0.0497193	-0.015847	0.138046	0.620399	-0.12186	-0.158452	0.449394	0.00544201	0.078748	0.480846	0.195775	-0.0877463	0.897721	-0.0691731	0.343222	0.434623	0.0730732	0.573725	0.0639067	0.129614	0.0836322	0.419904	-0.112974	-0.106896	0.157099	0.543899	0.355951	0.629634	0.0869346	0.255681	0.37245	0.195791	-0.0802095	-0.086695
19	0.172578	0.240484	0.16504	0.34845	0.112053	0.520617	-0.0332475	0.408132	0.0814347	-0.0897376	0.890619	0.0347194	0.0939782	0.164603	-0.0413785	0.512487	0.0196774	-0.176221	-0.607934	0.725378	0.0479484	-0.0537547	0.00217809	0.475249	0.182673	0.324328	-0.579236	0.694693	-0.224517	-0.466016	0.35451	0.0344519	0.0764199	-8.97774e-05	0.701117	0.16538	0.0331995	0.207124	0.013922	0.00659079	0.268515	0.276341	-0.111459	0.20064	0.1944	0.435104	-0.175184	-0.120171	-0.0582814
20	0.414458	0.995745	-0.310571	-0.041988	0.729479	0.583127	0.294783	0.137578	0.181056	-0.286248	0.00567867	0.354429	-0.507127	-0.0654785	0.13081	-0.294341	-0.0574013	0.350264	-0.114316	-0.567476	-0.170059	0.358143	-0.00188316	0.0984251	0.275461	0.350712	-0.503408	-0.127826	-0.0540285	-0.551472	0.290042	0.0610138	-0.0475637	0.472482	0.443761	0.0760347	-0.0968481	0.0115762	0.235177	-0.273707	0.470556	-0.241647	0.227361	0.0581397	0.562208	0.361309	0.00679577	0.119991	0.171472
21	-0.0456764	0.556836	-0.0107763	0.237474	-0.187542	0.427974	-0.154861	0.0600134	0.0845851	0.513804	0.345641	0.496544	0.136837	0.150773	0.199291	0.536525	0.333883	-0.194827	-0.168737	0.817896	0.149336	0.111591	0.597933	0.227134	-0.120099	0.452858	-0.459856	-0.14168	0.0299206	0.156877	-0.316798	0.251901	-0.332183	0.296824	0.15508	0.271806	-0.00017148	0.378499	0.350742	-0.100618	-0.246271	0.00866595	0.10413	-0.312658	-0.502855	0.306255	0.232767	0.0398255	-0.341936
22	0.208863	0.3744	0.0638799	-0.242853	-0.100665	0.184992	0.266581	0.146615	0.0263836	-0.0477966	-0.247838	0.560855	0.569837	-0.375459	0.390562	0.129025	0.199072	0.0799425	-0.435015	-0.0540943	0.0486217	0.236317	0.164294	-0.150366	0.274493	-0.0355144	0.803472	0.178951	0.346536	0.177408	-0.0127839	0.628886	0.436078	-0.286463	0.231401	-0.600403	-0.603173	-0.0772123	0.201875	-0.123447	0.398703	-0.336377	0.242738	0.0748497	-0.361384	-0.109636	0.478379	0.164226	0.0895845
23	0.791393	0.539194	0.27028	0.216934	0.11954	0.208832	0.0276137	0.339887	0.0656614	0.484417	0.390857	0.622643	0.424025	0.100807	0.334582	0.268429	0.0281306	-0.019104	-0.132899	0.490837	-0.0461995	0.0587337	0.368235	-0.184487	0.0846915	0.20041	0.00323051	0.124468	0.319385	-0.0138274	-0.117854	0.153633	0.166903	-0.170068	0.103891	0.777892	-0.192485	0.0285622	-0.457183	0.364526	0.0614105	0.113692	0.11498	0.227795	0.0246852	-0.320776	0.451982	0.182863	0.307416
24	0.327783	0.29635	0.0472248	-0.0780253	0.678398	0.462724	0.218449	0.270811	0.164251	-0.134463	-0.068731	0.544216	0.645589	0.294668	0.180703	-0.354843	-0.119951	0.139563	-0.443882	0.101313	-0.230955	-0.0860117	-0.0891792	-0.00390043	0.411327	-0.234053	0.365476	0.209876	0.322887	-0.578439	0.291273	0.174798	0.320209	0.157774	0.0637386	0.431603	-0.111617	0.0279159	0.0548537	0.280015	0.59217	0.144519	-0.137479	0.423882	0.471007	-0.0550292	0.0788337	0.122539	0.291112
25	0.0899205	0.489878	0.0159423	0.308595	0.760306	0.508803	0.165933	-0.0825895	0.513075	0.565379	0.536154	0.425637	-0.122142	0.613432	0.115908	0.0129488	0.41441	0.501639	0.863841	0.0431276	0.220559	0.18995	0.392989	0.376482	-0.15555	-0.032194	0.0711656	0.132172	-0.0440202	-0.146046	0.127844	-0.239095	-0.39661	0.584419	0.271325	1.0071	0.61912	0.238768	-0.113716	0.245893	0.0751032	0.0614518	0.0398991	0.285988	0.26929	0.215442	-0.361273	0.560408	0.451912
26	0.00589173	-0.0618454	0.0607944	-0.444918	-0.171129	0.301971	0.158809	-0.0324993	0.0557559	-0.175308	0.434903	0.223913	-0.199873	-0.0639681	0.343181	0.738695	0.460252	0.256999	0.58899	-0.0872945	0.171142	0.420679	-0.0771732	0.335721	0.225289	0.00715895	0.134145	0.121801	0.330002	0.398436	0.233432	0.238866	0.00599684	0.361276	0.207211	-0.336755	0.350694	0.0310039	0.360005	-0.354694	0.365768	-0.0653074	0.0750834	-0.0501132	0.119839	0.659405	-0.130727	0.274079	-0.0817072
27	0.298622	0.272768	0.000177442	-0.84775	0.0374668	-0.125394	0.52897	0.133163	-0.295594	-0.013261	0.228633	0.112487	-0.214268	-0.150247	0.671267	0.565428	0.383555	0.137182	0.875116	-0.0678089	0.321431	0.314805	0.116991	0.0785542	-0.47899	0.29409	0.519512	0.229418	-0.0285896	0.609921	0.156012	-0.222687	0.091128	0.233281	-0.105823	-0.145974	0.0654224	-0.0531919	0.203595	-0.283196	-0.498018	0.167193	-0.125897	-0.153058	0.442405	-0.471453	-0.109934	0.302827	0.219136
28	0.441238	0.123966	0.253584	-0.0939887	-0.666635	-0.0908672	0.35376	0.0447805	-0.26784	-0.116981	-0.036137	0.00823674	0.0922157	-0.238728	-0.0910114	0.444496	-0.15935	-0.295873	0.061227	0.102742	-0.269726	0.323295	-0.278003	0.237489	-0.194119	0.310279	-0.0111905	-0.45534	-0.0515808	0.0250197	0.219504	-0.331103	0.684764	0.0769967	-0.09952	0.0965398	0.0500997	-0.124409	-0.318555	0.213975	-0.223756	0.568662	0.00611039	0.295772	0.103088	-0.389561	0.195422	-0.172823	0.198821
29	0.0556164	0.512507	0.0853931	0.237521	0.329871	-0.0749663	0.413374	0.100859	-0.252542	0.0510714	-0.01976	-0.205162	0.40993	0.228491	0.156128	-0.0747824	0.184954	0.0112358	-0.196234	0.0991659	-0.0547108	0.0817028	-0.144085	0.108164	0.222155	-0.00291766	0.309843	0.704669	-0.0745373	-0.334816	0.0143158	0.0150988	0.366523	0.133814	0.150865	0.227976	-0.416156	0.281972	-0.164105	0.0563542	-0.0990303	0.487577	-0.0809242	0.305943	0.569201	-0.314865	0.311	-0.062749	0.11257
30	0.291411	0.0270596	0.169133	0.780599	0.0149869	-0.0148773	0.0659411	0.136506	0.137492	-0.169255	0.286669	0.0542284	0.0829155	0.464778	-0.0350517	0.0990624	-0.0717151	0.11711	-0.185712	-0.0794507	-0.713649	-0.125037	-0.137434	0.142284	-0.418985	-0.123914	-0.264114	-0.512218	0.264291	-0.378085	-0.33193	0.562693	-0.378157	-0.20128	0.335778	0.0139848	-0.00489118	-0.0822666	0.17765	0.281119	0.100535	0.192503	0.182049	0.0730583	0.477784	0.635301	0.221061	0.0596987	-0.0512761
31	-0.0784635	0.129082	-0.366922	0.478947	0.536152	0.727408	-0.377389	0.256076	0.29829	0.229459	-0.328647	0.0841649	0.0200727	0.111884	0.501924	-0.0392357	0.394275	0.401182	-0.137983	-0.0707806	-0.0379636	-0.010523	0.295588	0.329043	0.394936	-0.165546	0.362461	0.817071	0.011538	0.053379	-0.144897	0.573567	-0.317443	0.446426	0.0368664	0.447	-0.102265	0.204662	0.590691	-0.443827	-0.19826	-0.0652133	0.288007	-0.247974	-0.103809	0.299938	-0.0031009	-0.0936341	-0.23687
32	0.230916	0.373315	-0.0910588	0.000745811	0.0564655	0.0076198	-0.397094	-0.104877	0.421685	-0.0517566	0.455492	-0.105221	0.32408	-0.270899	-0.210628	0.189364	0.0379812	0.271363	-0.00502025	0.321591	-0.255978	0.30589	0.50772	-0.130254	-0.909488	0.115007	-0.117974	-0.416559	0.161845	0.205101	0.254022	0.0871601	-0.137232	-0.0146202	0.35736	0.129534	0.351358	-0.489745	-0.0458682	0.290962	-0.527088	-0.181554	0.252845	-0.209572	-0.024991	0.142237	-0.00476219	-0.0566463	0.344169
33	0.11636	-0.39643	-0.3597	-0.216107	-0.231977	0.323814	-0.214682	-0.279247	0.234264	0.18687	-0.0864409	0.280061	0.0721726	-0.416803	-0.0504209	0.106416	-0.133132	0.0441044	0.172532	-0.0575902	0.317742	0.756866	0.419435	0.115759	1.06573	0.417144	-0.0262535	0.256702	-0.152565	0.457637	0.427147	-0.406113	0.40394	0.196618	0.332868	0.130586	0.171418	-0.225718	-0.90003	-0.243938	0.0306731	-0.0476697	0.0995698	0.0166595	-0.99848	-0.0223235	-0.242898	-0.158356	0.11412
34	0.220861	-0.140857	0.232711	-0.602055	0.114974	-0.208012	-0.0432312	0.184029	-0.403174	-0.436486	0.393779	-0.0722352	0.111861	0.112208	-0.00360171	0.356062	-0.284574	-0.0923711	0.362225	-0.0149332	0.265488	0.234688	0.0470903	-0.0549217	0.316205	0.339991	-0.0219243	-0.197335	0.49612	-0.361707	0.0097985	0.103361	0.498798	-0.352952	-0.433182	-0.313625	0.0873253	0.00298652	-0.526505	0.532802	0.26617	-0.132805	0.677191	0.558052	0.572677	0.397168	0.163857	0.044574	0.187152
35	-0.392418	-0.0205198	-0.246699	-0.225947	0.130294	0.457938	-0.0423274	0.331866	-0.0250387	0.143894	-0.700534	0.294574	-0.546489	0.5941	0.162283	-0.269759	-0.0490422	-0.147731	-0.116932	-0.0081887	0.108499	-0.309734	-0.158426	0.505732	0.794576	-0.0691822	0.52838	0.192369	0.218106	0.137806	-0.503164	-0.220161	-0.0570055	-0.0161464	-0.612327	-0.117797	-0.250345	0.511616	0.052415	0.0637942	0.220643	0.227697	-0.203168	0.16822	-0.142502	-0.26033	-0.322265	-0.160518	-0.123992
36	0.34399	0.380146	0.504502	0.143625	0.290635	0.0288102	0.38722	0.197645	0.026208	-0.0333464	-0.104855	0.142097	0.242992	0.111907	-0.116342	-0.195333	0.403998	0.125625	0.247095	-0.00780998	0.353677	-0.205991	-0.000796298	-0.164175	-0.0525366	-0.194974	0.202031	0.646702	0.0704303	-0.709808	-0.196191	-0.135043	0.190645	0.00731147	-0.0616439	0.167552	-0.114418	0.138445	0.296207	0.274811	-0.120817	0.142553	-0.0344204	0.218302	0.876215	0.452681	0.162216	0.0498293	-0.00993236
37	-0.0878144	0.284983	0.210794	0.430352	0.179299	0.170367	0.538198	-0.145995	0.274629	0.407212	0.100432	0.0250538	-0.0487007	0.211409	-0.219638	0.0224967	0.250557	0.114174	-0.338525	0.159199	0.243339	-0.208587	-0.0286075	-0.120398	-0.336784	-0.214212	-0.183815	-0.283537	-0.19726	0.144203	-0.276751	-0.592297	-0.167743	0.156134	0.019447	0.345542	0.208665	-0.0925058	0.452871	-0.295074	-0.203598	-0.0137684	-0.436079	-0.363593	-0.125949	0.153972	-0.353627	0.24927	-0.104629
38	0.941098	-0.0628398	0.546287	-0.450649	-0.252478	-0.0834133	0.109003	-0.221312	0.0982379	-0.136149	0.487018	0.394	0.67415	-0.242062	-0.135451	0.235401	-0.30869	0.0523621	0.280589	-0.313853	-0.391591	0.0435501	0.223686	0.15238	0.111501	0.0584782	-0.636112	-0.146587	-0.115716	0.240193	0.376913	0.139671	0.140056	-0.102126	0.856213	0.219525	0.0469051	-0.394304	0.266919	-0.00503947	0.566888	-0.149546	0.294225	0.227529	-0.684131	0.21151	0.136569	0.120788	-0.111585
39	-0.0930841	0.192141	0.00730743	0.137291	0.359906	0.383272	-0.0952731	0.153067	-0.0908678	-0.357001	-0.16576	-0.28659	-0.246535	-0.0742614	0.496674	0.335526	0.0645149	-0.118816	0.0480419	0.317791	-0.396393	0.24055	0.161219	0.224935	-0.269958	0.0303237	0.288009	-0.528113	0.488662	0.357685	0.192653	0.352579	-0.124186	0.0111775	0.0218347	0.138485	-0.524305	0.0856853	0.296372	-0.165923	0.0930628	0.184746	0.181974	0.154121	0.225323	-0.166519	0.135153	0.0348442	0.0506986
40	0.233456	-0.142667	-0.0513391	-0.158349	-0.835378	-0.0882277	-0.0510171	0.0666081	0.185009	-0.313384	0.168312	0.815222	0.220316	0.0645692	0.587081	-0.365346	0.153185	0.273128	0.184989	-0.00382055	-0.127427	0.243923	0.222674	-0.0536629	0.138673	0.339828	-0.0384804	0.132173	0.568851	0.444536	-0.364189	0.365766	0.281938	0.116059	0.208187	-0.153107	-0.222093	-0.114152	-0.572417	-0.238382	0.327914	0.0723471	-0.631099	0.121807	0.354221	-0.286891	-0.0116116	-0.219625	0.338278
41	-0.278975	0.0807395	-0.445314	0.475995	-0.217846	-0.122654	0.163357	0.211948	0.352994	-0.123911	0.187522	-0.330931	-0.0401962	-0.0527696	0.187207	0.20623	0.26593	-0.108818	0.0109753	0.00472255	0.537687	0.173232	-0.0738159	-0.411397	-0.165694	0.0790703	0.0623605	-0.386786	-0.320751	-0.342877	-0.0887323	-0.38159	-0.0405387	-0.00152901	-0.314638	-0.29311	0.246651	-0.105922	-0.385074	-0.129015	-0.383884	-0.0512066	-0.0123884	0.296751	0.560162	0.551896	0.308889	0.20942	0.240563
42	-0.0261661	0.0322571	0.147818	-0.419828	-0.685581	0.224014	-0.054793	-0.218312	0.0346675	0.721624	0.382671	0.565002	0.0339745	0.0626458	-0.319704	-0.0483584	0.113188	0.363072	-0.613412	0.0595459	0.211162	-0.107541	-0.422922	-0.133538	0.187532	-0.00819246	-0.457511	-0.284918	-0.304967	-0.0181015	-0.124542	-0.185957	0.200458	0.0426742	-0.0862658	-0.282613	0.480418	0.0696118	0.137874	0.19537	0.00766251	-0.281658	0.201902	0.121346	0.0292064	0.135089	0.204588	-0.329169	0.10433
43	0.244868	-0.0111736	0.236989	-0.221666	0.571734	0.517359	-0.16175	-0.258229	-0.196399	0.207772	0.000806272	-0.730364	-0.0526969	-0.134512	-0.244724	0.117614	-0.247375	0.0066694	0.570795	0.485365	-0.244222	-0.364934	-0.00176545	-0.199093	0.149287	0.0993781	0.136613	0.0349371	-0.957782	-0.453221	0.369626	0.310641	-0.310646	0.035089	0.309747	-0.0366035	-0.21567	-0.219627	0.545414	0.448057	-0.0805385	-0.00488799	0.286036	0.30387	-0.401979	0.269272	0.0796979	-0.0214644	-0.237522
44	0.105802	0.129846	-0.0430443	-0.724869	0.481983	0.518311	0.0260727	0.144576	-0.303514	-0.690716	0.177076	0.360397	-0.0421001	0.0606443	-0.45493	0.137743	0.0442978	0.324037	0.56685	0.301306	0.398968	-0.45063	-0.0117306	0.0470099	-0.398595	0.0679792	0.109144	0.642936	0.207143	-0.0362604	-0.0880338	0.368965	0.229837	0.38498	-0.071979	0.736218	-0.0774821	0.30637	0.494474	0.187015	-0.279207	0.422006	-0.507893	-0.311786	0.56623	-0.585775	-0.539897	-0.138176	-0.162609
45	-0.13795	0.302152	-0.407517	0.393591	0.457737	0.329921	0.0871391	-0.258088	0.221318	-0.535035	0.272768	-0.046887	0.0192086	-0.255962	0.0732999	-0.342923	-0.0709022	0.128672	0.0454664	0.104937	0.0212874	0.0730255	0.430914	-0.182314	-0.3261	0.223324	0.230548	0.707942	-0.221682	0.257069	0.00361563	0.252737	0.154739	-0.21121	-0.0750044	0.220632	-0.100199	-0.19765	-0.390034	-0.306642	0.198445	0.0493286	-0.493164	-0.0113498	-0.465641	-0.152749	-0.201593	0.37797	-0.0688316
46	0.076835	0.457245	-0.32471	0.253195	0.573041	-0.437791	0.17153	0.400756	0.0075723	-0.359927	-0.235327	0.115418	0.0388312	-0.159105	0.0856054	0.0847166	0.298198	-0.132147	-0.302035	-0.543225	0.0885166	0.342157	-0.103941	0.17564	-0.27799	-0.590289	-0.0962923	-0.309606	0.693823	0.632455	0.362936	-0.267104	0.173795	-0.0563686	0.0752572	-0.095689	0.515713	0.0334559	0.262672	-0.357207	-0.0157143	0.239331	0.169467	-0.148879	0.510019	-0.0693729	0.0897797	0.315868	0.0288168
47	-0.169622	-0.0368043	0.626801	0.943382	-0.056389	-0.0533234	0.0118387	-0.346696	-0.147918	0.427413	-0.359991	0.179321	-0.382914	0.145974	0.900879	-0.298856	0.173516	-0.0502515	-0.259198	0.055634	-0.336982	0.484633	0.0864925	0.160709	0.627914	-0.233303	0.261965	0.495525	0.0873764	-0.0563434	-0.167421	-0.0703605	-0.0898264	0.232531	0.325818	-0.128701	0.0415116	-0.127687	0.217839	0.138656	-0.258194	-0.364169	0.3995	-0.288852	-0.158204	0.435762	0.104646	0.115535	0.066705
48	0.476674	0.0697328	0.632272	0.236657	0.53319	-0.634277	-0.13036	0.289012	-0.00425548	-0.112814	-0.190312	-0.0319203	0.138248	0.677967	-0.0313922	0.357565	0.230597	-0.0252663	0.73935	0.151822	0.49521	-0.181314	-0.258394	0.603758	0.499676	-0.154888	-0.134483	-0.356723	0.131868	-0.22958	-0.346136	0.203435	-0.276128	0.395074	-0.0532033	-0.100367	-0.0253823	0.566994	0.73529	-0.0840266	-0.422251	-0.0961703	0.410489	0.499384	0.598131	0.245492	-0.0452299	0.0337882	0.342026
49	-0.200823	-0.394945	0.122868	0.116087	-0.428712	0.164419	0.208678	-0.0281272	0.603838	-0.367154	0.310733	0.581316	0.111322	-0.0322907	0.236284	-0.197572	0.0155128	0.338606	-0.382696	0.588249	0.170909	-0.0774579	0.0299	-0.0737066	0.23669	-0.209345	-0.0646764	0.613574	-0.0788076	0.139473	0.283866	0.0962548	-0.236672	-0.0807318	0.0795899	0.172205	-0.0579868	0.000609939	-0.423286	-0.401651	0.0698782	0.0441232	-0.363988	0.0093237	-0.985011	-0.0818035	-0.268297	-0.187602	-0.188225
50	0.0256387	-0.0694372	0.0118036	-0.10685	0.473359	-0.109741	-0.219825	0.347585	0.131264	0.136401	0.0825848	-0.285868	0.251332	0.122284	0.124216	0.0766131	0.136423	0.00941219	0.104609	-0.0286695	-0.039955	-0.107859	0.0479856	-0.149324	-0.449031	0.364171	0.175294	-0.737932	-0.308294	-0.244428	0.253762	0.138291	0.0781212	-0.350673	-0.0321733	-0.203965	-0.0238193	0.0883549	-0.586164	-0.0294658	0.276197	-0.349881	0.0675932	0.33798	-0.128204	0.120785	0.0636964	-0.388271	0.00453413
51	-0.450702	-0.599717	-0.172167	-0.699122	0.108495	0.283023	0.0633656	-0.124721	-0.40558	0.265829	-0.0467389	0.264372	0.0362656	0.0434735	0.0496279	-0.647745	-0.152194	-0.0594462	-0.308054	-0.517138	-0.11489	-0.363191	0.102599	-0.380155	0.264344	0.0708247	-0.254397	0.178189	0.145318	0.111525	-0.169278	-0.0979227	0.0381279	-0.245775	0.372582	-0.0613346	0.0110874	-0.381506	-0.180684	0.505808	0.277678	-0.0943938	-0.196838	-0.305723	-0.0837346	-0.0726737	0.149824	0.216841	-0.0894995
52	0.0711922	-0.0688112	0.0850188	-0.544976	0.19897	-0.0903881	-0.14196	0.104041	-0.41144	0.414675	0.115394	0.0408039	-0.150497	0.166518	-0.125388	0.0114902	-0.404333	-0.253308	-0.0599653	-0.265834	-0.17603	0.0207167	0.0546224	0.288917	-0.261353	0.462426	0.261073	-0.316638	-0.0540927	-0.149186	-0.378257	-0.268604	0.0163496	0.0645244	0.422949	0.0122368	-0.0384937	0.27726	0.323564	0.471775	0.166991	-0.243493	0.278602	-0.541216	1.03514	-0.0134295	0.516186	-0.0253825	0.412202
53	-0.910866	-0.164177	-0.0213066	0.471051	-0.205857	0.150333	-0.0116025	-0.140396	0.0773163	0.368725	0.355547	-0.0109549	0.0156097	-0.0400715	-0.103669	0.00261987	0.0212073	-0.0219885	-0.118353	0.157498	-0.143383	-0.106564	-0.24643	0.247106	0.0814808	-0.22098	-0.697753	0.0774455	0.405317	0.410426	-0.505398	0.194993	-0.0135602	-0.173161	-0.152396	-0.317613	0.000861284	-0.147474	0.397277	0.0539927	0.0389406	0.421598	-0.105712	-0.252141	-0.0573965	-0.0574446	0.0940209	0.245638	-0.128942
54	0.25561	0.356379	-0.294984	0.324187	0.33089	0.0518085	-0.247598	0.204439	0.0793919	-0.309172	0.336695	-0.259395	-0.185093	-0.077455	0.128032	0.526041	0.298258	-0.183878	-0.00566113	0.148825	0.0525577	0.646307	-0.169324	-0.260207	-0.546397	0.0771362	0.242326	-0.216865	-0.168337	-0.150062	0.0971673	-0.291512	-0.256149	0.278822	-0.139709	0.285681	0.360525	-0.212066	0.103201	-0.0578496	-0.0334004	-0.341292	-0.162606	0.158907	-0.481188	0.15125	-0.0763628	-0.218483	0.0834661
55	0.0116983	0.430136	0.318056	0.420592	0.410182	0.0338866	-0.253055	-0.444733	0.115366	0.360508	-0.0832292	0.0896499	-0.213034	0.0223262	-0.119736	0.567683	0.0231762	0.0403182	0.557399	0.234392	0.064011	0.107308	-0.136635	-0.0397285	0.259691	-0.0402075	-0.548434	-0.298791	-0.314941	-0.324678	-0.166378	0.368494	0.166265	-0.101564	-0.495913	0.0418806	-0.0422915	0.229713	-0.256349	0.0148335	-0.301262	-0.0410216	0.271452	0.277464	-0.557547	-0.308793	0.27179	-0.0518301	0.294225
56	1.02398	-0.0666922	0.13027	-0.979395	-0.0293876	-0.0664269	0.282087	-0.192801	0.113773	-0.174084	0.0447082	0.0845082	-0.141989	-0.139854	-0.257326	0.399015	0.140958	0.0591238	0.368184	0.0357562	0.000768065	0.140493	0.389043	-0.373741	-0.147677	0.110886	0.503747	-0.419797	-0.0744567	-0.0327435	0.405005	-0.524672	-0.272963	0.553861	-0.205246	-0.23091	-0.422572	0.401335	-0.119686	-0.333253	0.167347	-0.577916	-0.222424	0.270307	0.0737267	-0.409584	-0.149385	0.1642	0.365535
57	0.075821	0.176445	0.36491	-0.219666	-1.02166	-0.106725	0.16933	0.0532264	0.277811	0.227842	0.0561381	0.205973	0.111536	0.122638	0.0186911	0.0263856	-0.254756	0.199971	0.255262	0.259418	-0.144373	-0.0684858	0.175541	0.395339	0.058069	-0.352683	0.611877	-0.243969	0.268983	-0.183933	0.310881	0.398167	0.362918	-0.0637475	0.598877	-0.0482978	-0.275128	0.582043	-0.621039	-0.6529	0.195934	0.385242	0.0151263	0.0556412	-0.198199	-0.148235	-0.388096	0.117295	-0.177027
58	-0.505579	-0.183573	-0.136432	-0.127133	-0.308887	0.180142	0.0716378	0.151477	-0.221705	-0.437979	-0.234394	-0.145045	0.143683	-0.0149133	-0.174484	-0.256428	0.450396	-0.214536	-0.257959	0.0736235	0.0441848	-0.285274	-0.147016	-0.0586138	-0.0840401	-0.0258922	0.351331	0.181822	0.228058	-0.0322648	0.456065	-0.111375	0.0597103	0.27596	0.109524	-0.273036	-0.188656	-0.140338	0.43978	0.493468	-0.0510375	0.0837029	-0.501666	0.666475	0.356787	0.178834	-0.355796	0.268452	-0.490234
59	-0.0518013	0.133939	0.326194	0.194694	0.159918	0.479038	0.13701	0.202387	0.114819	-0.438316	-0.149973	0.15368	0.22683	0.226976	0.253029	-0.00547766	-0.0315949	0.221401	-0.226905	0.0587124	0.476661	-0.146232	-0.122754	0.595094	-0.160841	-0.224589	-0.157506	0.628553	-0.155136	-0.0253266	0.0226109	0.143968	0.23428	-0.299575	0.0251579	0.385897	0.478949	-0.258216	0.285832	0.00470239	-0.320267	0.584243	-0.0668667	-0.143376	-0.305814	-0.0289929	-0.0276311	-0.3904	-0.0902156
60	0.103666	-0.360325	0.217385	0.317857	1.17968	-0.0197307	0.145086	-0.00309536	0.120831	-0.506474	-0.297034	-0.340558	-0.0254247	-0.0607122	-0.0350945	0.0872635	0.0169614	-0.150884	-0.195069	0.224502	0.17705	-0.552698	-0.307291	0.42059	0.312322	0.323235	-0.852796	0.573228	-0.599505	0.194087	0.0889704	-0.190673	-0.34661	-0.0749821	-0.684672	-0.486521	-0.0906197	-0.105146	0.271097	0.63261	-0.026131	0.303514	-0.102255	-0.56333	0.189835	0.280948	0.286131	-0.12626	0.229996
61	0.243142	-0.180593	0.131045	-0.205696	-0.181003	-0.060119	0.219022	0.31013	-0.190493	-0.519459	0.196886	0.339341	0.0136458	-0.498932	0.141275	-0.138215	0.0151046	0.352435	0.0838822	-0.0985643	-0.104147	0.177365	0.336994	-0.0222417	0.051028	-0.17442	-0.0812195	-0.0531953	-0.321831	0.268399	-0.288589	-0.113344	0.206146	-0.292828	0.0614194	0.125725	0.115689	0.00378627	-0.301799	-0.242451	0.161578	-0.0184726	0.190787	-0.184813	-0.406676	0.364712	-0.452583	-0.273876	-0.0214291
62	-0.068388	-0.148602	-0.247214	0.259583	-0.0169287	-0.0652358	-0.350229	-0.142159	-0.295802	0.171175	-0.389727	0.183165	0.263678	0.0121309	-0.110054	-0.480099	-0.59604	-0.486904	-0.227716	0.444453	-0.51784	-0.132242	0.0496892	-0.0539104	0.231189	0.261311	-0.0437238	0.0873719	0.0600666	0.323942	0.0731439	0.0741409	-0.09806	0.123572	0.387949	0.406652	-0.0477876	-0.100588	0.221413	-0.142711	0.132427	0.0556827	0.132328	0.808374	-0.579816	0.337879	0.0260804	0.61659	0.162129
63	-0.723812	-0.259487	-0.337207	-0.321505	-0.261751	0.0152852	0.0449608	-0.340335	-0.0157719	0.46374	-0.194302	0.154392	-0.136381	-0.248436	0.0606787	-0.26814	-0.280801	0.141404	-0.0374135	-0.231824	-0.642526	0.219717	0.240583	-0.00396735	-0.0853099	-0.0760481	0.696832	-0.436648	0.33595	-0.0301502	0.149816	-0.383781	-0.0955597	0.0486869	-0.232159	0.258212	0.202154	-0.256657	0.25572	-0.7963	-0.143777	-0.379372	0.241597	0.394277	0.251812	-0.427968	-0.0463067	-0.199963	0.100297
64	0.305499	0.297684	-0.135827	0.230613	0.373502	-0.30923	0.192094	-0.109712	0.483457	0.477607	-0.031867	0.0159539	0.107325	0.603383	-0.0554118	0.0645645	-0.00503891	-0.322158	0.0740463	-0.305918	0.244819	-0.060932	-0.127198	0.082205	0.0273101	0.186828	0.00968332	0.0367788	0.378392	-0.346863	0.00091657	-0.481873	-0.348016	0.040348	0.324689	0.294142	-0.3423	-0.133405	-0.399937	-0.45297	-0.123159	-0.209967	-0.0012089	-0.0535289	0.374889	0.234542	0.194617	0.367394	-0.00355616
65	-0.389729	0.049928	-0.0488637	0.0546862	0.0928156	-0.309291	-0.20247	-0.342224	-0.281292	0.0601958	0.281674	-0.0703327	-0.364472	-0.551392	-0.106185	0.38532	0.494006	0.735724	0.391465	-0.4189	0.336718	-0.320435	0.00107148	-0.243455	-0.0581482	0.127381	0.235409	-0.28806	0.101832	-0.398004	0.0941396	-0.069504	0.103644	0.0679376	-0.0874839	-0.0195668	-0.109094	0.208935	-0.526535	0.105039	0.254895	0.0658575	0.0293704	-0.241012	0.669293	-0.0900376	0.388287	-0.353462	0.154531
66	0.496052	0.115612	0.219202	0.0115824	-0.0797247	-0.0433599	-0.142227	0.099594	0.0724107	0.311552	0.378383	0.381009	0.379898	0.00663458	-0.275174	0.356253	0.46727	-0.196564	0.528182	-0.102933	0.518912	-0.0667077	-0.187952	-0.410486	-0.0487591	-0.0805078	-0.318922	0.314834	0.557003	-0.271714	-0.1768	0.277586	0.0992147	0.0352841	0.232489	0.272359	-0.430964	0.0140733	-0.185654	0.478828	-0.225947	0.167089	-0.463132	-0.245558	-0.0724559	0.0794594	-0.189308	0.151647	-0.004698
67	0.147002	-0.561399	-0.00257187	-0.219913	-0.136493	0.595349	-0.637408	-0.124752	-0.72857	0.188456	0.155177	-0.528471	-0.086652	-0.180373	0.376723	0.113394	-0.0252851	0.312919	0.317734	0.48169	-0.194615	0.318827	-0.138092	0.257188	0.230163	-0.0179841	0.124458	0.124268	0.00586428	0.317489	-0.556615	0.275585	0.0860513	-0.0744522	-0.50643	-0.362063	0.432754	0.121465	0.120747	0.399498	-0.153388	0.0459841	0.0738634	-0.240982	-0.342944	-0.561112	0.356342	-0.0853725	-0.0642471
68	0.211568	0.0161127	-0.158257	-0.102449	0.227505	0.236225	0.265292	0.520637	0.422854	-0.286935	0.204594	-0.185214	-0.0378081	0.332798	-0.128441	-0.175295	0.20906	-0.514228	-0.779863	-0.237987	-0.368458	0.82746	-0.289395	0.166541	0.203431	-0.21682	0.279183	0.36214	0.0666446	0.185553	0.0174824	1.62195e-05	-0.0220144	-0.329175	-0.0715665	-0.120869	0.0104508	0.106454	-0.276426	-0.275763	-0.154823	0.00796056	-0.45971	-0.121326	-0.218081	0.182828	-0.334603	0.370104	0.0493749
69	-0.0774736	0.432804	-0.127044	-0.276459	-0.562005	0.252088	-0.196549	0.0604294	-0.148915	-0.65849	-0.330611	-0.763833	-0.16893	0.138102	0.0843918	0.375601	0.140067	0.362302	-0.566236	0.21987	0.0524066	0.293021	0.090455	0.143584	0.0856959	-0.018322	0.184265	-0.00958094	-0.158283	0.231923	0.0171838	-0.0519425	-0.0450849	0.160197	0.111398	-0.326119	0.135662	-0.116045	0.172174	0.03896	0.372499	-0.0196023	0.125729	-0.281254	0.683005	-0.139456	0.190671	-0.0147576	0.203429
70	-0.41202	0.236358	-0.366301	0.0189629	-0.198841	-0.386866	0.437249	-0.198759	0.307382	0.0884397	-0.069922	0.572316	0.175799	0.378708	-0.0734355	0.459581	0.0557237	-0.118204	-0.55865	-0.229529	0.213102	-0.182865	0.0532417	-0.244183	-0.078713	0.147573	0.152873	0.0284285	0.0181551	-0.00990379	0.510814	0.392023	-0.186467	0.3549	0.449522	0.154386	-0.0385582	-0.0286225	0.308175	0.298213	0.407852	0.555804	-0.534072	0.156984	0.529488	-0.0571206	-0.601176	-0.507908	0.0387924
71	-0.369046	0.160402	0.182636	-0.45965	0.0650696	-0.0196772	0.0846443	-0.221413	-0.131283	0.475524	-0.109612	-0.0156796	0.0526489	-0.103748	-0.101682	0.256886	-0.0396383	0.513269	0.508044	0.169458	0.311554	-0.229707	0.294986	-0.133014	0.00931009	-0.0905859	-0.0516921	-0.483797	-0.0865357	-0.573953	-0.00125881	0.0688736	-0.0334716	0.214912	0.228045	-0.0686591	0.129825	0.0692425	0.456186	0.287116	-0.228192	-0.628358	0.688025	-0.689077	0.550543	-0.254437	-0.0706005	-0.25191	-0.150161
72	0.0951506	0.0467087	0.03601	0.278832	0.474411	0.182149	-0.166998	0.28903	-0.0165273	0.453972	0.578168	0.333952	0.193835	0.0191891	-0.0296127	0.0435613	-0.115185	-0.1869	0.27419	-0.0770568	-0.476016	-0.0356522	0.0127672	-0.181936	-0.277972	0.25141	-0.0978766	-0.0846694	-0.22528	0.0496067	0.0771529	-0.0229033	0.163079	-0.266063	0.24216	-0.0602425	0.367939	0.233815	-0.0323939	0.318122	-0.357911	-0.19676	0.337222	0.180124	-0.691402	0.0598935	-0.0831643	0.149386	-0.369232
73	-0.383319	-0.379332	0.362704	-0.171792	0.377591	0.35205	-0.177221	0.1567	0.08522	-0.151547	0.222666	-0.437427	-0.264277	-0.072029	-0.561425	-0.838261	-0.205675	-0.0768304	0.474357	-0.0476182	0.00506042	-0.136918	0.0864848	-0.0444957	-0.346136	0.225218	-0.062013	0.197117	0.010721	0.368585	0.243582	-0.264739	0.313219	0.0773726	-0.268238	-0.158581	-0.0576232	-0.10502	-0.171804	-0.505405	-0.198863	-0.444693	0.294354	-0.368354	-0.241271	0.323923	0.129757	0.273831	0.0990664
74	0.262175	-0.169854	-0.369892	0.211248	-0.485466	0.490917	-0.302161	0.142923	-0.0802765	-0.39404	0.237962	0.0912182	0.132495	0.0958513	0.430645	-0.362836	-0.166151	-0.253417	-0.182092	0.307437	-0.278589	-0.448767	-0.20724	-0.016751	0.218442	-0.146411	-0.414895	0.0701472	0.0865993	0.0480592	-0.143789	-0.428821	0.212282	-0.0728913	0.056306	-0.346569	-0.00315845	0.123019	-0.283504	0.0160533	0.234874	0.514061	-0.286636	0.787394	-0.604975	0.0714805	0.115887	-0.321636	-0.0348852
75	0.00206468	-0.688543	-0.234871	-0.0119761	-0.218495	-0.102666	0.38574	-0.342842	-0.0248022	-0.376286	-0.144899	0.231629	0.163081	-0.449635	0.108166	0.0816879	-0.446668	0.0324523	-0.099113	0.181467	0.0997845	-0.0469409	0.15495	0.157316	-0.0260977	-0.292286	-0.437117	0.312842	-0.502823	-0.111782	-0.0248497	0.144992	0.0627759	0.203026	-0.424939	0.185862	-0.0897368	-0.487523	-0.360244	-0.235531	-0.0676083	0.199586	-0.165085	-0.267416	0.457172	0.172718	-0.0880212	0.00562312	0.33518
76	0.55469	0.359579	0.25088	0.379446	-0.313381	0.295535	-0.0273995	0.132929	0.157199	-0.148263	0.209226	0.489319	0.440887	-0.433725	0.566981	0.343052	0.36701	0.478386	-0.19448	0.454292	-0.211209	0.189299	0.218003	0.0625006	0.386978	-0.106165	0.297278	0.246594	-0.0293172	-0.425927	-0.333116	-0.0229332	-0.236673	-0.288522	-0.180595	0.177817	0.00210734	0.366762	-0.293607	0.498215	-0.118834	0.109262	-0.0671988	0.353387	-0.199914	0.0732837	0.122963	0.233434	-0.141216
77	0.0666066	-0.264296	0.343884	0.224418	0.207084	-0.533416	-0.170538	0.0862408	0.0799141	0.295184	0.039058	-0.104482	-0.478963	0.043159	-0.078074	-0.00771419	0.136055	0.0805041	-0.0533245	-0.0530649	0.270836	0.418503	0.185628	-0.220064	-0.560969	0.396777	0.150922	0.0945132	-0.428149	0.643907	-0.236227	0.555498	-0.0697541	0.163906	0.168422	0.291775	-0.0475708	-0.151426	0.487989	-0.224834	0.249708	0.0272189	-0.23083	-0.106742	0.224462	-0.145054	0.0206055	0.212282	-0.0725616
78	-0.308706	0.572437	0.557134	0.0151889	-0.0312941	0.265837	-0.0829901	0.308068	-0.160852	0.466932	0.583373	0.172406	-0.0630424	0.568452	-0.023511	-0.0759052	-0.0327637	0.173554	0.11865	0.0128036	0.351763	-0.305369	-0.234267	-0.331502	-0.31463	0.0934453	0.715426	0.0266469	0.426993	0.105106	0.0133786	-0.260632	-0.421069	-0.00968399	-0.107815	0.264428	0.171401	0.383668	0.616578	0.382413	0.291091	0.199581	0.25356	0.546659	-0.162608	0.102613	-0.0393326	0.265276	-0.216294
79	-0.469629	-0.148504	-0.0862702	-0.133276	0.617668	-0.45188	-0.137103	0.0960416	0.0669597	0.387374	-0.10594	-0.377324	-0.336808	0.0705797	-0.318081	-0.52777	-0.217563	0.147272	0.186817	-0.102664	0.315122	-0.53002	-0.333063	0.0856423	-0.551647	-0.121705	-0.551356	-0.737567	0.0834256	-0.122122	0.05384	0.249482	-0.00643045	0.0124531	0.126296	0.0832526	0.139528	-0.591739	0.152896	-0.216004	0.0373718	0.0189789	0.066487	-0.117351	0.202832	0.251589	0.142238	-0.0905991	0.562271
80	-0.337523	0.0264648	0.105073	-0.558778	-0.332617	0.76112	0.14599	-0.323114	0.027177	-0.325683	0.179073	0.278816	0.389147	-0.444615	0.0375614	-0.235751	-0.0568904	0.0669662	0.18622	-0.309855	-0.0786255	0.0941869	-0.241198	0.0346645	0.466113	-0.037999	0.0856469	0.103561	-0.0122486	-0.487164	0.294303	-0.0731011	-0.290271	-0.00449845	-0.280017	-0.155686	-0.0918765	0.206057	-0.405141	0.0808122	-0.29261	-0.200298	0.130927	-0.0544308	0.196703	0.287824	-0.100803	-0.109842	0.234342
[truncated: 170 more columns]

## Sheet: Fig 2C SyGCaMP 10s pulses
Source Data	Figure 2C	AWC SyGCaMP Data: individual dF/F(%) traces - 10 sec stimulation
		Six trials per animal: Read from left to right; Trial 1 signifies a new animal
		Acquisition Rate: 5 Frames/sec
		Stimulus ON:	Frame 25
		Stimulus OFF:	Frame 75
Frame / Trial #	1	2	3	4	5	6	1	2	3	4	5	6	1	2	3	4	5	6	1	2	3	4	5	6	1	2	3	4	5	6	1	2	3	4	5	6	1	2	3	4	5	6
1	17.2673	16.0642	23.9617	23.4467	28.4254	25.7615	24.3811	21.5278	20.3809	21.4129	21.9216	18.8281	22.3497	17.8317	15.6066	19.7004	16.687	15.5418	5.78773	17.6049	27.7503	13.1764	13.0114	21.4534	31.6616	35.4542	34.4536	26.3884	27.2692	32.6292	24.1688	19.496	16.8457	13.8077	22.3801	16.4274	7.84862	6.37786	9.20543	7.75858	10.5793	6.59915
2	15.5637	15.8303	22.0674	19.9446	26.1359	24.8303	23.2893	20.1421	19.0719	20.1269	20.764	18.5215	20.4315	16.8465	14.2954	19.1719	16.6446	14.0478	4.9972	16.6731	26.0578	12.8925	12.3782	19.2006	28.9176	34.5291	33.1961	23.9856	26.9976	30.344	23.7554	18.192	15.0336	12.7697	20.6183	14.3408	6.52399	4.41003	7.08609	6.39131	8.85113	5.25514
3	14.2437	14.7939	22.1823	18.2076	26.5353	24.6736	21.5429	17.9936	19.2553	19.9075	20.2732	18.0892	20.4992	15.9881	14.5343	18.0257	15.0231	14.1793	3.61024	15.7131	25.9345	11.5628	11.0068	18.8409	27.0252	34.2669	31.9339	24.5542	26.7116	29.8398	25.3429	17.9005	15.605	11.7727	20.5304	13.8713	6.07167	3.48179	7.12444	6.28788	8.7427	4.41681
4	14.1524	14.0212	22.4597	18.0846	26.8198	24.4006	20.3911	19.3136	20.4671	19.8496	18.5483	17.6552	20.6364	15.9381	14.1327	17.9562	14.9181	14.7186	3.62521	16.2945	24.9983	12.1451	9.97461	17.649	26.7241	33.9047	32.0984	24.142	27.0591	28.6753	24.3582	16.6442	14.0017	10.4779	19.8945	13.7116	4.73231	3.63657	6.37533	7.11026	7.98834	4.51259
5	15.007	12.7067	21.9707	18.4554	25.882	24.5908	21.0851	18.8725	19.0101	20.8877	17.9586	17.0723	17.6291	13.9268	13.4437	16.7522	15.5723	15.2704	3.9469	15.4341	24.0858	11.6786	10.022	17.8327	25.8426	33.3882	31.3273	23.9664	26.0628	27.3027	23.9596	17.1415	13.6494	10.4093	19.385	13.4321	5.122	3.32661	6.209	5.97928	8.61462	4.63125
6	14.5381	13.0801	22.3135	17.8122	25.5947	25.4253	19.8634	16.8204	17.9212	20.2651	18.1516	17.8682	18.6574	14.8076	13.0919	16.8249	15.0163	15.0141	2.39328	15.6879	24.1429	12.1825	11.3052	16.2908	25.4806	33.2733	30.896	24.2085	26.3634	27.4429	22.2879	16.3404	14.5487	9.69765	18.8221	13.2305	5.01762	3.22056	5.96097	5.9797	7.87393	4.28305
7	14.1453	12.4781	22.3583	16.3904	23.0368	24.4866	19.824	17.6445	18.147	19.0545	19.4215	17.4025	17.1962	13.5826	11.0234	16.2468	14.4089	14.6424	2.96352	16.0614	23.5359	11.6214	10.5891	17.9608	26.015	32.6853	31.6728	22.9269	26.3951	26.9494	22.4485	16.6095	14.567	9.46818	18.3652	12.5953	4.92224	2.60515	6.53291	5.91831	8.19283	3.45335
8	13.862	12.0277	22.0976	17.583	25.2331	23.3795	19.5239	16.6339	17.2349	19.6293	18.8631	16.3424	18.1719	13.3297	11.437	16.0365	14.7257	13.9666	2.44523	14.9745	23.3196	11.4863	10.32	16.8054	26.7828	32.2488	31.6374	22.975	25.0767	26.4176	21.6446	16.9288	14.0692	10.0455	16.9206	13.885	4.59927	3.88183	6.8293	6.11928	7.57039	3.79679
9	12.4294	11.5195	22.2732	17.4192	23.6374	24.0348	20.3302	16.5761	17.0581	21.1237	18.3902	16.2296	18.6367	11.3354	11.1408	16.1033	14.9983	12.1044	2.52254	15.9698	21.8399	11.0554	11.2919	16.8537	27.0766	31.7833	31.0874	21.4248	24.7182	25.9194	21.4162	17.3513	12.8792	8.12567	17.4245	15.8519	4.29472	3.33316	6.14731	5.95531	8.02164	3.60609
10	13.0568	12.0544	21.7161	17.8313	22.6332	24.7403	20.2826	16.2723	16.9304	21.4717	18.551	16.1454	17.7003	11.483	11.1831	16.0158	15.3366	10.6826	2.90201	15.9353	23.812	11.5804	11.7579	17.1159	27.4232	30.7541	30.3263	22.4056	25.5993	25.2319	20.7908	17.4755	13.8631	7.99297	16.9033	15.8624	4.31846	3.87733	6.61128	6.39635	8.11129	4.54625
11	11.6294	11.1743	21.1573	17.569	22.5538	25.4087	20.4678	15.6159	17.2967	20.0492	18.4064	15.9342	17.8599	11.516	10.5293	14.3772	14.5819	8.67728	2.37042	14.7615	23.166	11.1381	11.3677	17.358	25.7707	30.9436	29.9339	22.2989	23.8683	26.018	20.9245	18.2781	13.7168	8.72098	17.4791	14.7529	4.61196	4.0579	7.26868	6.43671	7.44488	4.16052
12	11.5579	12.1611	21.4146	18.8773	21.3912	24.6448	20.5578	15.6781	15.9343	18.1231	17.4436	14.7007	18.3687	11.9053	11.3441	15.028	15.0037	7.41678	2.90908	15.0799	23.5545	11.1095	11.244	16.5193	25.3537	31.0437	29.4513	23.6082	23.358	25.3697	21.0001	17.4922	12.1225	8.63564	16.931	14.8094	4.69792	2.97817	7.598	5.94102	6.67132	4.64289
13	12.3227	11.4242	20.7546	18.7006	21.8813	23.2785	20.9526	15.7937	15.7266	19.4332	17.1167	14.7034	18.4753	12.1876	10.0027	15.2139	15.9976	7.10121	2.87749	13.8094	24.4466	10.4625	10.3577	16.1848	25.5177	30.0857	30.5775	22.3959	21.9106	25.107	22.178	17.7474	11.9404	7.70184	15.5491	15.0627	4.61892	2.82872	7.72806	6.63264	6.83611	4.48714
14	12.9749	11.9279	20.3715	17.3912	20.7258	22.8583	19.1008	15.9037	15.9988	18.3087	16.6398	13.4267	17.6567	11.784	10.2655	14.9535	16.3477	5.8844	2.87582	14.8972	24.7101	10.4339	10.011	16.1502	24.8746	30.168	29.4567	23.2543	21.4555	25.4463	21.5503	17.8752	12.0534	9.05211	15.5941	17.2401	4.54074	3.07111	8.05447	6.67258	7.1708	4.58939
15	11.8199	11.3754	19.8495	17.1204	20.6967	23.2217	19.4154	12.8771	16.8425	18.5399	17.6008	12.3991	17.4491	10.959	10.1775	14.3425	17.4268	5.81531	3.72038	14.4812	23.9863	11.3401	9.58886	15.3004	24.6685	30.4897	30.1927	24.3145	22.2299	24.9748	21.7891	17.8352	10.7159	8.16854	15.37	17.1046	3.88047	2.12568	6.46037	6.37029	6.63716	3.51462
16	13.3438	11.7222	20.7375	14.8705	20.484	23.0879	18.5332	14.2176	16.2741	18.6632	16.4311	12.891	16.7453	10.9612	9.65889	13.6245	17.8044	6.34928	3.83551	14.4233	23.8206	11.3194	10.9948	15.8144	24.3112	30.4677	30.2485	24.4709	22.9081	24.9557	21.216	16.7957	12.027	7.52219	16.3701	17.0219	4.6795	3.14072	7.34788	6.41233	6.61966	3.79679
17	11.6425	11.8136	19.9741	16.2277	19.5294	22.9912	18.2486	13.5269	16.7854	20.0194	16.5001	12.6972	16.2361	11.636	10.7174	13.7202	15.73	4.96577	3.47142	14.74	22.2635	11.9836	10.3484	14.1444	24.1774	29.8491	30.8101	25.9871	22.6552	24.905	18.2456	16.4703	12.0562	6.97914	16.8692	16.942	4.58822	3.60913	7.41958	6.2471	5.8256	4.29255
18	12.1375	13.1571	20.6779	15.1008	19.5529	23.9453	17.0753	14.4906	16.6599	18.0042	17.2766	12.7079	15.2409	11.6913	11.3863	12.8926	16.2937	5.96374	4.12812	13.1053	23.0392	11.2719	10.14	13.8366	24.4653	30.6861	30.1653	26.2151	21.9832	25.0659	19.4146	17.1145	11.8047	7.22167	16.2983	15.0853	5.66233	3.77783	6.81846	6.0558	6.64656	5.30217
19	11.8936	11.7923	19.9134	16.3055	19.7145	22.2021	17.6699	15.4221	16.6591	17.8892	16.9649	11.7173	16.4678	11.7274	11.5251	12.7409	15.3912	6.82041	4.46519	14.0468	22.3297	11.9237	10.5271	13.6037	23.9151	30.3084	29.6154	25.7282	22.0357	25.9961	19.6554	17.8458	12.2123	8.66259	18.2026	16.0213	4.21654	2.88604	5.89719	5.85188	6.85574	3.76702
20	11.7787	12.6206	20.0349	16.2375	19.3187	21.1553	18.6074	14.4789	16.7947	19.6894	15.7863	12.457	15.858	11.8366	11.6269	14.0785	15.3637	5.54922	3.89329	13.7607	22.0446	12.9299	10.6831	13.4946	23.512	30.4224	30.212	24.248	22.2731	25.2627	18.6294	17.0733	11.6815	8.45435	17.6626	15.0853	4.43799	2.59041	6.61586	6.29671	6.36693	4.65066
21	10.9537	13.4146	19.0134	15.4448	19.8579	22.4968	17.6909	14.6136	16.6087	18.5618	15.7612	11.564	16.1321	11.4602	11.5927	15.0568	15.4452	5.76227	3.62521	13.3141	22.093	11.7318	10.2109	13.3021	23.794	29.766	28.8023	24.0622	22.0512	24.5425	18.3446	16.7949	12.6654	8.90145	17.7188	15.1163	4.74745	2.78941	7.10443	5.73416	6.8741	5.38674
22	11.0311	14.2513	20.1479	14.8432	19.7801	22.3907	17.387	13.5122	16.4271	18.779	15.1437	10.7066	15.7337	12.8936	11.9952	15.0158	14.6676	7.13687	3.34507	13.1204	22.9674	11.5289	10.473	13.0963	22.0902	29.6538	29.0681	23.1456	20.5274	23.0773	17.4674	17.0631	12.8833	8.683	17.7208	15.8568	4.99347	2.83404	7.29536	5.7165	7.30443	4.87545
23	11.6272	13.1045	19.8062	15.0541	19.9452	22.7888	16.4791	13.796	16.2255	19.2792	14.5517	10.5983	15.7255	12.0931	11.9836	15.5726	14.2638	8.35012	3.43111	13.5851	22.4911	11.6165	10.7399	12.1883	22.2725	29.2792	29.5668	22.5691	21.463	24.0602	19.1808	17.6882	11.864	9.80013	17.2791	14.9683	5.05978	2.94991	7.36706	5.86324	6.76951	5.57399
24	11.8075	13.4642	19.653	15.0179	19.7766	23.121	15.329	13.5452	16.8531	21.0794	15.0895	11.101	16.0626	12.8936	11.1035	16.3213	13.4096	6.83512	3.75031	12.8931	22.0792	11.9079	9.29844	11.8237	20.5332	28.7078	28.8974	22.0126	21.3149	24.7114	18.299	17.2701	11.7539	9.86709	17.0029	15.2946	4.50594	2.44669	7.12652	4.52414	7.40817	4.6485
25	11.9003	12.994	19.2908	15.2238	17.9403	21.6083	14.5775	13.693	15.9736	19.3257	14.369	11.424	15.7337	12.2688	10.1806	15.588	12.5242	6.86721	3.31972	14.1779	21.6275	10.9299	9.24479	12.9646	19.9353	28.003	28.0116	22.0388	20.9889	23.0107	17.7133	18.1181	12.9507	9.47634	15.6675	13.739	4.84529	2.93435	7.41416	5.19768	7.0073	3.72345
26	9.54009	10.9403	15.6654	11.7575	14.3479	16.0386	11.2163	9.36327	13.2634	15.598	11.0598	7.95353	12.524	9.3464	8.1107	12.4336	9.18413	5.58175	1.26942	11.4256	17.719	8.64431	7.3728	10.8718	17.0808	23.5913	23.2762	17.7049	18.0241	18.7094	13.3526	14.729	10.0478	7.08898	12.556	10.6752	3.68726	0.747459	5.30524	3.54998	4.83944	3.04777
27	6.24448	7.1904	10.613	8.32193	9.92746	11.7048	7.853	7.14082	8.30944	11.1314	8.63589	5.99858	8.65739	6.20864	4.18976	8.14749	6.26444	3.7543	1.29685	8.07966	13.5028	7.03078	6.45986	7.64581	13.6112	18.6051	17.66	13.7386	13.2571	13.9622	10.0705	10.5853	6.69166	5.31611	8.68836	8.05093	2.35404	1.21014	4.04631	2.345	3.45624	2.12228
28	4.59556	4.94547	7.70139	5.42063	6.90696	8.8781	6.19749	4.76624	6.2448	7.38093	5.30518	4.10512	6.30766	3.15204	2.52193	5.31444	3.58536	2.24598	1.56576	5.91598	10.2074	5.42517	3.22667	5.00795	10.1277	13.532	13.552	10.1817	9.93491	10.0363	6.38821	7.06229	3.19777	2.60945	5.62617	5.06007	1.86569	0.0255909	2.14123	0.989504	1.99663	0.732539
29	3.03306	3.40466	4.53173	3.96142	3.54139	5.09582	4.03358	2.1765	3.72365	4.34428	3.54668	1.63102	5.16711	2.04963	0.99865	3.59782	2.22103	0.283478	0.505073	4.11571	7.50072	3.4569	2.73629	3.9017	8.21185	10.0772	9.81034	7.02569	6.49316	7.59062	4.94841	4.93312	2.28336	1.29797	3.4565	3.45857	1.8002	-0.163577	0.822267	0.80451	0.897754	1.07771
30	2.5822	0.81834	3.11986	1.88273	2.5301	3.46391	2.3845	1.69055	2.58218	2.53572	1.21904	1.20189	3.04955	1.33252	0.681985	1.49175	1.55509	0.325376	0.625606	3.02378	5.47636	1.61758	0.695367	2.59231	6.9119	7.48337	6.41681	4.98856	4.87215	5.43201	3.5811	2.84109	2.489	0.77615	1.81961	2.15833	0.853394	-0.223767	0.626757	0.123399	1.02882	0.717006
31	2.06062	0.924261	1.88403	1.27881	1.2319	2.24944	1.94855	0.520426	0.660271	1.28262	1.27009	0.666251	2.1649	0.362564	0.198983	0.38299	0.0664139	-0.952504	0.603577	2.00706	3.42345	1.24258	1.7861	1.72781	5.96592	4.71443	4.03815	3.37849	3.22851	3.02269	2.31899	2.24051	0.527273	0.0371151	0.700245	1.115	0.0154731	-0.755238	0.616336	0.283166	0.738516	-0.323684
32	1.21875	0.506671	0.361887	0.181098	-0.546204	-0.630867	1.61976	0.447402	0.553327	0.430554	-0.562298	-0.244157	1.80111	0.231899	-0.119461	-0.271347	-0.0903841	-0.250049	0.263592	1.62978	2.05282	0.657647	0.66566	0.88149	4.10109	3.95744	3.18312	2.0496	2.44739	2.09729	2.00297	1.51623	0.292776	-0.332402	-0.518288	-0.307434	1.08754	-0.582858	0.477936	0.0548673	-0.143912	0.207879
33	1.26029	0.0898429	0.541032	0.223901	-0.509652	-0.0244235	0.451643	-0.604055	-0.27041	0.0220696	-0.735148	-2.01685	0.871146	-1.16618	-0.296473	-1.37108	-0.576548	-0.948047	-0.132918	0.727334	1.1646	0.810814	0.252421	0.989276	2.95923	2.32978	2.06966	1.1908	1.05473	0.513163	1.47537	0.266076	0.208243	-0.748058	-1.07596	-0.644592	0.569311	-0.367485	-0.0581527	0.0321636	0.452058	0.407215
34	0.732345	-0.521302	-0.245579	-0.962533	-0.502577	-1.50916	-0.0756168	-0.228069	-1.34913	-1.60924	-1.28997	-0.624273	0.745137	-1.40522	-1.40346	-1.06964	-1.00053	-0.0886983	-0.245554	-0.213344	0.704263	-0.117868	0.0892542	-0.340079	2.87266	1.03424	1.40528	0.582668	0.7009	-0.0162085	0.584997	-0.062181	-1.17476	-1.53486	-0.000361344	-0.601439	0.0449456	-0.712246	-0.240323	0.196555	-0.167819	0.315745
35	0.925786	-0.988424	-1.33592	-1.60342	-1.26979	-1.32214	0.442213	-1.2817	-0.989412	-1.64828	-1.20265	-1.08505	0.6338	-0.440607	0.3204	-1.52722	-0.611692	-0.94359	0.346718	0.626082	0.536396	0.373321	0.334892	0.0147706	2.64121	-0.00769365	0.190147	-0.0469685	0.0484475	-0.196658	0.871398	-0.480667	-1.11461	-2.22776	-1.40639	-0.289689	0.151784	-0.6713	-0.443753	0.343289	0.19036	-0.467793
36	0.147906	-1.38392	-0.649137	-1.04892	-1.35979	-1.38448	-0.769628	-0.20764	-1.70576	-1.50306	-0.582897	-1.23166	0.704141	-0.628356	-1.23446	-1.30339	-0.825713	-0.464886	0.154282	0.441224	-0.424513	-0.453249	-0.566518	-0.405726	1.6292	-0.286443	-0.295138	0.0676175	-0.139386	-0.684111	0.838666	-0.659085	-1.14103	-0.561054	-1.96086	-1.07693	0.53902	-0.420714	0.0218854	-0.213793	-0.344134	0.72995
37	-0.237106	-0.424525	-0.710658	-2.53965	-1.95367	-1.65949	0.226165	-1.14435	-0.858604	-0.561041	-1.3858	-1.32256	0.045182	-1.03329	-0.72566	-1.33543	-0.890595	-1.18428	-1.09843	0.0778087	-0.198239	-0.0602103	-0.285853	0.496035	1.79866	-0.0065338	-0.321713	-0.604255	-0.567868	-0.426611	0.635653	-1.09105	-1.3296	-1.29111	-1.18557	-1.17049	0.177163	-0.604559	-0.73014	-0.209169	0.0315488	-0.295639
38	-0.504257	-0.485487	-0.574075	-2.00927	-1.29651	-1.4267	-0.60202	-1.52468	-2.41195	-1.81808	-0.852022	-0.413939	0.514264	-0.932946	-1.20911	-0.794365	-0.599077	-1.20122	-1.08014	-0.00621797	-0.293854	-0.154399	-0.537254	-0.465607	1.57858	-0.561714	-0.83858	-0.456037	-0.460251	-0.16472	0.360942	0.0529538	-0.850041	-1.16453	-0.963143	-1.34109	-0.321824	0.100112	-0.718051	-0.373981	0.0814976	-0.62614
39	-0.0997887	-0.522826	-2.59651	-1.47929	-1.59247	-2.17795	-0.212362	-1.00221	-2.25816	-1.91022	-1.96032	-0.834607	0.204851	-1.26385	-1.05834	-1.58002	-1.23528	-2.18046	-0.515298	-1.17041	-0.292989	-0.359061	-0.278315	-0.167977	0.96418	-1.99258	-1.30846	-1.03874	-1.20047	-1.88897	0.0437589	-0.196913	-1.14713	-1.47811	-1.18396	-1.11	-0.414744	-0.38673	-0.105259	-0.575371	-0.444458	0.711397
40	-0.300339	-0.887837	-1.52048	-1.38629	-1.95721	-1.94397	-0.642743	-1.25605	-1.8021	-1.66233	-1.46595	-1.30697	-0.591337	-1.47122	-1.14062	-2.1942	-1.23032	-0.335627	-0.189028	0.237459	0.295412	-0.213377	-0.451237	-0.242495	1.12227	-1.30634	-1.4294	-1.11148	-0.76007	-1.33804	0.353929	-0.864042	-1.2154	-0.49695	-0.98121	-1.17614	-0.604269	-0.0947887	-0.159034	0.3538	-0.423113	-0.460027
41	-0.359456	-0.884026	-1.62921	-1.79681	-1.65653	-2.37405	0.274604	-1.07697	-1.1021	-1.67286	-1.42878	-1.74992	0.737801	-0.492784	-1.29895	-0.738408	-2.13597	-0.0521493	-0.346552	-0.89648	-0.940662	-0.610377	-0.829891	-0.72997	0.638825	-0.51532	-1.77179	-1.07042	-0.794221	-1.73846	0.219106	0.125219	-1.63807	-1.47444	-1.81672	-0.798249	-0.0942303	-0.149656	-0.658439	-0.122978	-0.401767	0.0564355
42	-0.285747	-2.77309	-1.74374	-2.59724	-2.30465	-1.81219	-0.581015	-1.20998	-1.40261	-1.67373	-1.01995	-1.21918	0.406379	-0.863822	-1.28205	-1.25195	-0.423355	-0.813885	0.433169	-1.08302	-0.276548	-0.637225	-0.299154	-0.642144	0.101825	-1.23017	-0.81162	-0.90304	-0.880791	-1.12366	0.177412	-0.761972	-0.485088	-1.44095	-1.6762	0.0821519	-0.223173	0.111986	0.854783	-0.42107	-0.35438	-0.0561766
43	-0.177988	-0.627224	-0.954805	-0.971872	-1.585	-1.28308	-0.42841	-1.24736	-1.67129	-1.07044	-1.32087	-0.253961	-0.212878	-0.864714	-1.2647	-1.07325	-0.410288	-0.124802	-0.113384	-0.150324	-0.591948	-0.496823	-0.313786	-1.27245	0.141439	-0.923199	-1.38934	-1.49865	-1.41888	-1.0494	-0.500597	-0.1667	-0.746001	-1.87458	-0.910548	-0.790586	0.343355	0.0133073	-0.664275	-0.0906047	-1.40416	-0.363379
44	-0.392008	-0.51673	-1.19586	-1.01779	-1.71313	-2.35984	-0.34482	-1.9111	-1.74509	-1.97648	-1.58059	-0.845748	0.432272	-1.55194	-1.13617	-1.71856	-0.865363	-0.528624	-0.527351	-0.741031	-0.762411	-0.556681	-1.12519	-1.51374	0.25955	-1.50854	-1.48909	-1.194	-1.57693	-1.50731	0.542135	-1.09799	-1.67302	-1.36746	-1.04906	-1.3302	-0.0864528	0.184869	0.0748274	-0.271814	-0.528133	-0.211935
45	-0.50725	-0.553307	-1.57813	-0.74229	-2.02992	-2.67273	-0.865221	-0.812695	-1.31997	-1.60529	-0.619168	-1.88761	0.865967	-0.558786	-1.29984	-1.11928	-0.568438	0.0735438	0.134332	-0.523822	-0.793129	0.23864	0.383664	-1.43568	0.0743144	-1.50776	-1.52183	-1.00511	-2.09794	-0.862165	-0.0891153	-0.842811	-2.15176	-1.41401	-1.17031	-0.747836	0.486624	-0.700372	-0.280759	-0.768773	0.273181	0.0469433
46	-0.31755	-0.474818	-1.70466	-1.42364	-1.70095	-2.17361	0.405776	-0.939183	-1.5617	-1.69392	-1.04816	-0.730332	0.237648	-0.792023	-1.05255	-1.7154	-1.43713	-0.640054	-0.0776396	-0.862869	-1.29889	-0.032922	-0.348814	-0.347619	0.809756	-0.891883	-1.78989	-1.35239	-0.507904	-1.13204	-0.629574	-0.679091	-1.23897	-0.755408	-0.918176	-0.55264	-0.310772	-0.0939698	-0.3658	-0.136012	-0.560152	-0.290461
47	-0.0844481	-0.87412	-1.57349	-1.78125	-1.64985	-2.05958	-0.696755	-0.35108	-1.41012	-1.59037	-0.43602	-1.22586	-0.057524	-0.563246	-1.33052	-0.862055	-0.545459	-0.648969	-0.762182	-0.520881	-0.549116	-0.0245594	-0.55632	-0.924693	0.028464	-1.13468	-1.82879	-1.76107	0.057581	-1.1017	0.079218	-1.35643	-1.48851	-0.994675	-1.02016	-0.793409	-0.682044	0.249972	-0.418325	-0.179317	-0.532829	0.316608
48	-0.326904	-1.53861	-1.10029	-1.66062	-2.00162	-1.82837	-0.0588988	-1.17651	-1.14674	-2.10635	-1.10413	-0.663488	0.356321	-0.734494	-0.562435	-0.99202	-1.38262	-0.332062	0.0711558	-0.467944	-1.02633	-0.569885	-0.924776	-0.36758	0.157946	-0.697029	-1.93894	-0.592523	-0.972524	-1.33604	0.20313	-1.06492	-0.614732	-1.64184	-1.34737	-0.772034	-0.345156	-0.239735	-0.292848	-0.66997	-0.531122	-0.122622
49	-0.219894	-1.67425	-1.58781	-1.23998	-1.96035	-1.93332	-0.0314641	-0.451922	-2.16447	-1.52587	-1.54387	-0.659923	0.391707	-0.772401	-0.940476	-1.62109	-0.615297	-0.282587	0.108562	-0.277204	-0.817357	-0.471295	-0.171458	-0.728639	0.38353	-1.2553	-0.966064	-0.855328	-1.36566	-0.779127	-0.142888	-0.710529	-1.52712	-1.07348	-1.54892	-0.74098	0.108393	-0.556244	-0.0810803	-0.67964	-0.657061	-0.245158
50	-0.923317	-0.508348	-2.04824	-1.56295	-1.96114	-1.60189	-0.467418	-1.33734	-1.60014	-1.03666	-0.694846	-1.4411	-0.391534	-0.641289	-1.40302	-0.850774	-1.70973	-0.308884	-0.252204	-0.45366	-0.770199	-0.311086	-0.12712	-0.542343	-0.607574	-0.719066	-1.53107	-1.14355	-1.41411	-1.03862	-0.567229	-0.0891274	-1.14916	-0.966502	-1.18557	-0.449396	0.326163	-0.355611	-0.402901	-0.119615	-0.131959	0.37313
51	-0.207547	-0.709523	-0.602707	-1.36917	-2.03739	-1.8694	0.388201	-0.195035	-0.867001	-1.61275	-2.32617	-0.402353	-0.296165	-0.734494	-0.831067	-1.33453	-0.489588	0.0218403	0.0445555	-0.746913	-0.810867	0.216634	-0.591791	-0.522826	0.164915	-1.49771	-2.07567	-1.10484	-0.784293	-0.88572	-0.282777	-0.713387	-1.60149	-0.662314	-1.44092	-0.999091	-0.220307	-0.351926	-0.0435624	-0.280643	-0.146047	-0.0993229
52	-0.168634	-1.36029	-1.02677	-1.30496	-1.66675	-1.40776	-1.16572	-1.09523	-1.68897	-1.37231	-1.06383	-0.550746	-0.384198	-0.0856241	0.236342	-0.916207	-0.805888	-0.379308	-1.01613	-0.0499118	-1.07305	-0.156159	-1.06577	0.165582	0.230206	-0.799482	-0.934482	-1.16428	-1.06664	-0.648181	0.0297311	-0.548033	-0.881335	-1.35439	-1.10808	-1.03982	0.460836	-0.457975	-0.313274	-0.0851389	0.0507599	-0.0117358
53	-0.493406	-0.47177	-0.848402	-1.94818	-1.86799	-1.6011	-0.812066	0.039685	-0.565612	-2.25597	-0.888294	-0.993695	-0.0333579	-0.621666	-0.499725	-0.918915	-1.15643	-0.722067	0.271489	-0.525923	-1.26471	-0.605536	-0.116478	0.322603	-0.36475	-0.66726	-0.858222	-1.95426	-0.627038	-1.08214	0.517586	-0.99959	-0.633833	-1.86233	-0.896094	-1.28624	-0.534681	0.367485	0.00979634	-0.145262	-0.466658	-0.741341
54	-0.681609	-0.406236	-1.56846	-1.05514	-1.2521	-1.53955	-0.591732	-0.97526	-1.04377	-0.310071	-0.635289	-0.909472	0.406379	-0.620775	-1.28694	-1.31197	-1.15598	-0.258963	-0.140815	-0.543148	-0.919895	-0.100703	0.335778	-0.388427	0.0651443	-1.35582	-0.624824	-0.834992	-1.17267	-0.92684	-0.050539	-1.1972	-0.984156	-0.751733	-0.621874	-0.499405	-0.273522	-0.455108	-0.381224	-0.529123	-0.897413	-0.317644
55	0.167362	-0.541877	-0.979568	-1.08277	-0.940028	-0.565369	0.100565	-1.40906	-0.841811	-1.32975	-0.602152	-0.443796	-0.0696071	-1.35393	-0.76124	-0.262322	-0.718477	-0.282587	0.620203	-0.667087	-0.601034	0.125966	-0.816589	-0.317014	-1.23004	-0.260927	-0.804302	-0.406761	-0.561117	-1.07415	-0.686075	-0.683582	-0.798021	-0.61985	-0.525114	0.117239	0.0183385	0.271673	-0.585071	-0.298302	-0.156293	-0.161885
56	0.00086057	-0.27593	-1.18154	-0.765248	-1.37119	-2.61197	-0.655174	0.160522	-0.257594	-1.04411	0.0695428	-1.02623	-0.163682	0.0642181	-0.497501	-0.822344	-0.153013	-0.945373	-0.549379	-0.557433	-0.275683	-0.0289608	-0.6348	-0.58182	-0.394094	-0.890724	-1.12051	-1.27652	-0.705268	-1.47098	-0.314339	0.362021	-1.20524	-1.34623	-0.516682	-0.440926	0.106756	0.0444258	-0.780581	-0.262985	-0.0922558	-0.323684
57	-0.114381	-0.081613	-1.31658	-0.374569	-1.08427	-0.866027	-0.14549	0.0375117	-0.865233	-1.25823	-1.0692	-1.46917	0.0145428	-1.14924	-1.1415	-0.785791	-1.31638	-0.43324	0.264424	-0.875894	-0.871871	0.23644	-0.602432	-0.818682	-0.435176	0.0298081	-1.14978	-1.12048	-0.339927	0.0708224	0.0195999	-0.30919	-0.436319	-0.79093	-1.2735	-0.194511	0.378149	-0.354792	-0.466264	0.150727	-0.560152	0.298055
58	-1.31132	-1.03872	-1.60715	-1.56489	-0.412571	-1.17221	-0.607592	-0.237632	-0.755637	-1.0915	0.15149	-0.17464	-0.256031	-1.14121	-0.354735	-0.480283	-0.0421733	-0.398474	-0.0793021	-0.553231	-1.06656	-0.0580096	-0.34704	-0.85328	0.275323	-1.12656	-1.1933	-0.849071	-0.720756	-1.22107	-0.820898	-0.104642	-0.500531	-1.50792	-1.68463	-0.609505	-0.140486	-0.111167	0.0122975	0.094809	-0.379995	0.0409028
59	0.0876659	0.211005	-0.991562	-0.19674	-0.36069	-2.40522	0.0594132	-1.86067	-0.863907	-0.0876201	-0.911132	-0.660814	0.250594	0.209601	-0.37297	-0.776315	-0.865363	-0.248712	-1.02652	-0.0196622	-0.338849	-0.0804564	-0.685346	-0.364031	0.118698	-0.543156	-0.310544	-1.03718	-0.518229	-1.05459	-0.128081	-0.19528	-0.476147	-0.889332	0.0943912	-0.772841	0.496449	0.378541	-0.691788	0.160818	-0.0149846	0.0620445
60	-0.579463	-0.321651	-1.26318	0.00599248	-0.64014	-1.30675	-0.565154	-0.771836	-0.400776	-1.22225	-0.421242	-0.712952	0.699825	-0.14672	-0.0256178	-1.28218	-0.0137874	-0.554476	0.091106	-0.688094	-0.755489	-0.360381	-0.615734	-1.02228	-0.131096	-0.339023	-1.71132	-0.445478	-0.362959	-0.458549	0.240927	-0.922017	-0.0034951	-0.336894	-0.497411	-1.1596	-0.134346	0.231546	-0.503365	-0.217577	-0.20368	-0.78837
61	-0.194451	-0.168484	0.42689	-1.19717	-0.428686	-0.7228	-0.267231	-1.10262	-0.494463	-1.17706	-0.272574	-0.365812	0.612223	-0.202911	0.536551	-0.629202	-1.61105	0.136836	-0.0194515	-0.513739	-0.588919	-0.395592	-0.221118	0.0928375	0.0420357	-0.645609	-0.385647	-0.820522	0.0702886	-0.673731	-0.409416	-0.059323	-0.927259	-1.28376	-0.0328823	0.199108	-0.806893	-0.00307091	-0.194885	-0.245747	-0.0832906	-0.279675
62	-0.794605	0.256727	-0.113639	-0.203355	-0.449517	-0.534988	-0.446842	-0.131573	-0.0308901	0.550774	-0.205404	0.223747	0.657966	-0.686776	-0.37297	-0.823246	-0.595472	0.317353	-1.06975	-1.31829	-0.887013	-0.233183	0.10566	-0.472704	-0.274149	-0.477045	-0.740753	-0.613641	-0.00158844	0.487214	-0.417599	-0.589678	0.3387	-0.203786	-0.4946	-0.332842	-0.324689	-0.0182207	0.121516	-0.446717	-0.178919	-0.0242483
63	-0.00774513	0.24301	-0.497464	0.0639717	-0.513582	-0.65533	-0.18064	-0.584495	-0.699513	-0.262685	-0.254214	-0.943339	-0.709146	-0.637721	0.0909076	-0.635519	-0.398123	0.0927098	-0.566836	-0.545249	-0.37822	0.405891	-0.193184	0.263165	-0.885611	-0.750769	-0.419925	-1.09584	-0.00317688	0.0572488	-1.21679	0.0345813	-0.379422	-0.978751	-0.373349	-0.690165	-0.383634	-0.269216	-0.65969	0.0910251	0.539575	0.52069
64	-0.0301948	-0.0648484	-0.0354807	-0.350444	-0.52891	-0.651384	-0.349964	-0.618834	-0.723819	-0.758043	0.0556611	-0.581494	-0.489925	0.0985569	-1.03521	-1.01864	-0.254842	-1.04923	-0.404325	-0.273002	-0.0403227	-0.507386	-0.66229	-0.529923	-0.33027	-0.483617	-0.695691	-0.24329	-0.253754	-0.64379	0.657474	-0.094435	0.185078	-0.334035	-0.168587	-0.216692	0.941811	-0.69423	0.365383	0.33488	0.264643	0.468483
65	-0.13945	-0.660753	-0.466898	-0.501812	0.0413868	-0.367299	-0.181498	0.688207	-0.385751	-0.188535	-0.768285	0.0847129	-0.611619	-0.585098	-0.547314	0.00979249	-0.0561409	-0.176951	-0.342811	-0.125956	-0.326735	0.183184	-0.182543	-0.527706	-0.0980833	-0.433744	-0.553186	-0.317986	-0.210072	-0.936421	0.153643	0.337525	-0.209137	-0.636591	-0.160156	-0.335665	0.0842423	-0.143514	-0.25533	-0.921393	-0.0969518	0.0607501
66	-0.067985	-0.393282	0.171135	0.107553	-0.337894	0.386317	0.169581	-0.399328	0.0954987	-0.243379	-0.786196	-0.0520933	0.103871	0.213614	0.279928	-0.85303	-0.0705591	-0.0976127	0.506736	0.133686	-0.313756	-0.275436	0.459484	-0.00297186	-0.491297	0.339487	0.470919	-0.277314	0.643319	-0.64379	-0.0672944	-0.375331	-0.844758	-1.16943	-1.11973	-0.275171	0.132954	-0.545598	0.0143819	0.188567	-0.150316	-0.53165
67	0.0790602	-0.181438	-0.048249	-0.306862	-0.498254	-0.353489	-0.42498	-0.518426	-0.289413	-0.102099	-0.238541	-0.274014	0.169033	-0.238588	-0.233762	-0.370626	-0.0881313	0.213946	-0.202329	-0.0578943	-0.537867	-0.102903	-0.353248	-0.128056	-0.0658046	0.0475924	-0.0340085	-0.191668	0.0246209	0.146276	-0.0563839	-0.607234	-0.056328	0.430314	0.255792	0.709684	-0.16259	0.155797	-0.462095	0.163341	-0.45812	0.0227813
68	0.17522	0.0403112	0.420312	-0.260167	-0.147271	0.0572511	0.458073	-0.531031	-0.00172348	-0.644405	0.0655126	-0.2143	-0.0268848	0.0606504	-0.296473	0.855918	-0.534195	-0.180517	-0.0406486	0.275691	-0.214247	-0.149117	-0.146185	0.262278	0.0754148	0.399026	-0.700312	0.149744	-0.213248	0.135896	0.433419	0.285265	-0.650089	-0.32097	0.073112	-0.385271	-0.305041	-0.0747254	0.263251	0.293256	0.0422216	-0.0380551
69	-0.169383	0.132516	0.113484	0.280324	0.224542	-0.362564	-0.278376	-0.241109	-0.230196	0.742511	0.148355	-0.0877432	-0.360032	0.90262	-0.190177	0.254379	-0.210686	0.318244	-0.658274	-0.401143	-0.204296	0.133008	0.223601	0.00146375	0.359688	-0.421372	-0.251231	0.24634	0.338338	-0.348763	-0.165489	-0.726452	-0.672441	-0.0690446	0.10483	-0.0162529	0.190262	-0.139829	0.171957	-0.0927069	0.717597	0.574192
70	-0.336258	0.234628	-0.0138131	-0.154715	0.347563	0.640021	0.236453	-0.243283	-0.274387	0.235306	0.296576	-0.251732	-0.0160964	-0.510177	0.0624434	0.369904	0.446244	0.124802	0.0728183	0.102176	0.166915	-0.186529	0.113197	-0.247374	0.0130582	-0.400882	-0.0243798	-0.541683	-0.652056	0.38102	0.0386933	0.177479	0.231815	-0.325053	-0.685711	-0.366719	0.134591	0.0882374	-0.24199	0.206225	-0.350965	-0.0661002
71	0.26876	-0.00388633	-0.211143	-0.276121	-0.262431	0.498767	0.419922	-0.0802828	0.126433	-0.645282	-0.0132996	-0.179542	0.828424	0.273373	1.0876	-0.0384931	0.390824	0.493858	0.559521	-0.965382	-0.445281	-0.186088	-0.539915	-0.114749	0.294763	-0.015426	0.40737	0.288968	0.239855	0.0831984	0.268593	0.249745	1.44616	0.376418	0.664914	-0.529249	-0.0688511	0.0628512	0.316193	-0.015346	-0.207949	-0.469087
72	0.408322	0.383985	0.104585	0.04257	0.221398	0.294384	-0.527432	0.0727196	-0.290296	0.538927	0.0574523	-0.443796	-0.113192	-0.086516	-0.441907	-0.273603	-0.155717	-0.332062	0.12976	0.535754	1.33333	0.513724	0.132263	0.48672	-0.450948	0.0433396	0.127753	-0.107977	-0.15527	0.14428	-0.34824	0.397542	0.181014	-0.042913	-0.171398	0.25678	-0.251417	0.424809	0.0223023	-0.139376	-0.146474	-0.428961
73	0.623838	0.185096	0.243876	0.291219	0.388046	-0.259188	0.718274	0.27397	0.417657	0.133076	0.901997	0.795482	0.631642	0.0686776	0.242569	0.146526	0.0357752	-0.762182	0.00340816	0.463491	0.208449	0.145332	0.34908	0.314175	0.271288	-0.215693	0.292981	-0.00238558	0.12509	0.292392	-0.580087	0.232189	0.580106	0.819022	0.552094	0.0325462	0.114534	-0.192648	0.227817	0.34497	0.329107	0.0145835
74	-0.842124	0.262823	-0.31329	0.778011	0.0229141	-0.534199	-0.590017	0.978564	0.832177	0.17388	0.33643	0.623026	-0.605146	-0.0985569	0.0370925	-0.100768	0.242586	0.398474	-0.0281797	0.0395765	0.333484	-0.0751748	-0.055734	-0.0437796	0.091921	0.657672	0.264095	0.75396	-0.140577	0.745911	0.323145	0.0292736	-0.00633995	0.938247	0.486249	0.909317	0.131317	0.364619	-0.0564853	-0.0275388	0.321849	0.861547
75	-0.244589	1.4211	0.660203	0.625864	0.0237002	-0.829332	0.494081	-0.117664	0.336344	0.379658	0.493606	0.475524	0.503044	1.22951	0.381776	-0.185155	0.635933	0.583448	0.0744808	-0.204101	0.0141908	0.449464	0.0857071	0.85399	0.886785	-0.00305426	0.1732	0.255726	0.471767	0.530729	0.494596	0.0260074	0.164758	0.772475	0.120087	0.932708	-0.383634	-0.145152	0.199887	0.510623	-0.244237	-0.0233853
76	0.861431	-0.138765	1.0568	0.143742	0.691471	0.0343664	0.960042	0.0405543	1.2162	0.21293	0.667351	0.320002	0.699825	0.0120409	0.372881	-0.095804	0.195727	-0.78937	0.269411	-0.109991	-0.259675	-0.0342424	0.0910277	-0.293505	0.762438	0.032901	0.311468	-0.0802102	0.0198555	0.514361	-0.432406	1.20022	0.250103	0.178389	0.325652	0.428989	-0.312	-0.274539	0.572148	0.0254366	0.364967	0.380896
77	0.568837	0.678127	1.26999	0.110666	1.2657	0.174042	-0.109053	1.02464	1.43363	2.01052	1.31083	1.11187	0.61697	1.15236	1.16098	1.46423	0.795885	2.23662	-0.0044888	0.685741	0.325264	1.05553	0.794686	0.399782	0.235341	0.698653	0.299143	0.902179	1.22628	0.93674	0.57019	0.413056	-0.0372269	1.25999	2.58365	2.79151	0.499314	0.675395	1.08906	0.330675	0.716743	0.83609
78	1.57047	2.02844	4.25199	4.78947	4.01224	3.43313	1.53574	2.03828	3.59991	3.98801	2.85439	4.09354	2.87952	3.84238	4.76705	4.52833	2.19715	7.75598	1.00923	0.864298	0.927509	2.30331	2.39665	1.44836	1.10136	2.37154	1.95335	2.17279	4.61403	3.98682	0.644615	3.52455	3.38025	4.98497	5.83294	2.88104	0.215231	2.59082	1.95072	0.625824	1.68114	1.08548
79	3.98044	5.19085	8.23457	6.52223	7.49456	5.99819	2.06043	4.34462	5.42195	5.23365	2.85708	5.3649	2.52437	4.37173	6.55496	5.45478	2.10659	9.18585	1.09111	2.28939	1.54966	4.43223	3.21825	2.41089	2.38371	4.09894	3.32178	3.6233	6.77431	4.53815	3.34029	10.8144	7.00012	8.10443	5.76669	3.55334	0.57013	3.35404	2.5781	1.37168	1.68712	0.962078
80	5.07635	5.24647	7.5354	8.1262	8.06328	6.76759	2.07672	3.91821	6.63811	7.14663	2.84454	6.86487	4.09732	5.33322	7.72822	4.84151	3.59302	9.72116	0.893271	1.78397	2.60445	3.77643	3.90195	3.07535	2.02131	5.01985	3.9384	4.18998	8.65741	6.64964	11.2149	15.7313	8.17261	9.16766	6.56808	4.05666	1.27215	4.32773	3.76826	1.77741	2.62718	1.74734
81	5.69709	5.57643	10.0918	9.27061	8.88041	8.276	3.94571	5.14223	9.47788	7.75651	4.4275	6.85907	4.91379	7.23925	10.9954	8.07303	4.63293	12.3206	1.36002	1.83144	2.2791	5.3125	5.26626	3.36411	3.15583	7.4304	5.17356	6.98853	12.2846	10.1876	16.8596	17.9274	9.3142	11.5746	10.8592	6.03443	0.66346	6.05685	4.77957	2.46861	3.47545	2.1732
82	8.89467	8.63216	14.8285	12.9058	11.7822	11.6688	3.58648	8.18054	12.6858	11.966	4.27167	8.78016	6.52688	8.20519	13.1173	10.1389	6.22569	15.7914	2.14639	2.42719	3.70986	7.35824	6.99104	4.62027	6.64927	12.6779	7.47982	10.1692	18.6169	14.3706	21.1049	20.6392	10.2485	14.9779	12.6238	6.89346	0.585276	7.79048	5.91095	2.30422	4.76643	2.40446
83	11.9995	10.8344	18.7209	15.4829	14.6227	15.6275	5.30372	10.739	15.3585	14.8262	5.74402	11.9093	8.56676	9.52925	15.6786	13.9345	7.32914	16.9481	2.91905	2.37048	4.62405	8.57257	8.4662	6.80482	9.95857	17.9869	10.1597	14.2227	24.7162	18.329	23.4807	22.7398	11.1528	16.8593	14.0166	8.7696	0.535336	10.0064	8.42339	3.79047	5.94727	3.99095
84	15.4732	12.8896	22.6861	19.0263	17.045	18.6751	6.82078	12.5559	18.5222	18.9479	6.87918	14.1887	10.6118	9.59079	18.928	17.0027	8.86963	19.9678	4.1967	2.37342	5.27778	10.7046	9.76976	8.19937	13.7539	24.0804	14.1972	20.083	29.9096	24.9972	26.7039	24.4983	13.9672	19.7277	17.1254	10.7179	1.43138	12.6364	9.2146	4.07132	6.20769	3.78169
85	19.0808	15.3045	26.9414	21.7618	21.5539	22.1922	9.53124	15.5625	21.1202	21.2492	8.14063	17.6975	12.8886	12.6898	21.4128	19.2302	10.3908	22.6907	4.68506	3.62163	5.80128	11.1355	11.4812	9.6964	17.4689	29.5812	18.5528	25.975	36.5886	29.3523	29.6716	23.705	14.9714	20.0895	19.1127	11.1789	2.12112	14.37	10.075	5.5971	7.7386	5.24738
86	22.6993	17.4305	30.4651	22.8564	24.2097	24.1315	10.7311	19.6166	24.2945	22.8788	9.98913	18.7875	15.5659	14.5017	23.5779	20.9156	11.086	23.5893	4.73618	4.24595	7.16066	12.6024	13.1147	11.3726	21.5107	34.8782	21.5099	30.506	41.1395	34.6289	28.7586	23.3604	16.6978	20.6019	21.4145	12.8397	1.86815	14.4793	11.0013	5.7884	9.4518	5.74226
87	25.7454	19.2007	31.7338	24.9242	26.8937	25.3914	10.8164	21.7569	25.8607	25.5798	10.3756	19.7915	17.9359	16.863	24.8148	23.1363	13.4758	24.15	5.49097	4.49341	7.95543	15.013	14.8785	12.1936	26.7043	40.9341	27.219	34.5107	44.7655	37.988	29.1354	22.1164	17.791	23.2016	22.4114	12.9312	2.13791	15.6295	11.7896	7.62572	9.78052	6.77907
88	29.4466	21.9867	34.3974	26.5605	28.1133	27.1693	12.6686	25.2994	27.3279	28.7292	12.9047	20.6952	20.3982	18.9916	26.6071	24.8615	14.7198	26.4945	6.11649	4.91942	9.10887	16.6327	15.8393	14.2677	29.8206	43.7429	31.8118	36.2201	47.2347	40.2556	29.3205	23.3588	18.0731	23.6629	22.9595	14.8719	3.5661	15.729	12.4495	8.08063	10.7035	6.92447
89	31.9703	22.5475	35.0393	26.7126	30.4016	26.5758	14.872	26.2705	27.49	29.1605	14.2978	21.4457	22.0493	21.2486	28.6774	25.9048	16.9384	26.9763	6.48017	5.13075	9.57223	19.064	16.4587	15.2116	33.4395	46.3529	34.7313	39.9166	48.2386	42.5495	29.1374	22.4038	18.3816	22.9664	23.7319	16.9332	3.28447	15.1934	12.4891	8.25511	11.1099	7.3883
90	33.196	24.2659	37.1956	27.2531	33.0695	26.9649	17.4521	28.7724	30.5216	29.3233	14.9839	23.1172	23.5101	22.9357	29.4002	28.7352	16.7753	27.0985	7.59779	5.46854	12.3226	21.0024	17.7525	18.5157	37.2147	50.1503	38.8042	42.7476	49.5451	44.5596	28.8159	21.5003	19.8808	24.0872	25.9305	17.8148	3.70896	14.9179	12.2048	7.78422	11.0335	7.1963
91	34.9729	24.8305	38.7518	29.6427	34.4781	28.8836	18.5774	29.6131	31.7413	30.6869	16.2963	23.6769	23.7094	25.169	29.8703	29.3399	18.2536	27.1595	8.99971	5.85422	13.197	22.9984	20.048	21.5124	39.8692	51.8548	40.9529	44.2059	51.9194	47.8444	27.5705	23.3849	20.3717	23.3441	25.5001	18.2318	4.8461	15.5042	13.6767	8.05414	11.6145	6.68544
92	35.9802	26.302	39.9934	30.2902	32.1262	28.0985	20.166	30.538	31.9212	32.3893	16.2583	24.5623	26.0009	26.0926	30.0215	29.7162	17.3273	27.3293	8.83429	6.42854	13.582	22.8518	20.5082	22.459	42.8752	52.8229	42.869	45.2517	52.3916	49.5647	26.6455	21.7787	19.0233	23.9892	25.4307	17.7136	5.17808	14.5313	13.3595	8.35896	12.0163	7.19543
93	37.1397	29.0887	39.1542	31.4179	33.165	30.4315	20.6539	30.312	31.8509	32.3533	17.0809	25.6532	27.1341	28.6225	29.486	31.52	19.4693	27.7996	9.17802	7.34485	14.1319	24.2831	21.7111	23.4224	44.6329	53.8478	44.0611	46.8868	51.8563	49.4305	26.4881	21.771	20.9391	25.4338	24.6445	17.6861	5.34837	14.7704	13.2378	8.8185	11.9573	7.10785
94	36.6956	28.8228	39.143	31.944	33.5518	31.1038	20.8639	31.2252	31.0559	35.0385	18.6759	26.6621	28.3765	29.6371	30.0913	31.3178	19.1561	28.063	10.7832	6.62852	14.825	24.1485	22.7659	25.2202	46.4988	54.156	45.5966	46.6588	51.8706	49.187	25.8841	22.334	20.8212	23.85	25.8358	20.0845	6.71556	14.4318	13.6167	8.85382	11.3601	7.09318
95	38.5394	29.8835	37.9749	31.0358	33.7098	28.9878	21.909	31.766	33.0635	35.4997	19.344	26.7294	30.2835	30.8122	30.5334	31.848	19.4373	26.568	10.4432	7.50954	15.9417	24.4147	23.2466	26.7709	49.0485	56.5944	46.667	46.5453	52.9265	48.2053	23.9179	22.3524	20.9537	24.749	26.7897	20.2551	6.19202	14.2799	14.3125	8.61291	11.6641	6.79245
96	38.2801	31.3642	36.4937	31.902	34.5186	28.1036	21.7281	32.9469	32.778	35.8349	19.5836	26.9406	32.1322	31.4124	30.6019	32.3602	20.237	27.7305	10.7782	8.49476	16.9701	24.8201	24.9957	27.5879	51.8714	56.7115	48.2811	45.6838	52.8268	49.5986	24.3036	22.4953	19.8097	26.5423	25.7956	21.801	7.14005	14.3463	14.164	9.41427	11.7943	7.81631
97	37.4641	31.07	37.4312	31.8697	35.0005	28.3561	23.1225	34.5935	32.2601	35.9064	20.4085	25.5463	33.0242	31.7402	31.8281	32.117	20.2388	27.1698	11.8036	9.56652	16.1956	25.0855	26.4607	27.6757	52.3651	58.1049	49.963	46.6955	51.5509	48.9423	21.7467	22.9435	19.7751	25.7241	26.9495	23.6227	7.11508	14.1677	14.0415	8.28707	11.5586	7.60964
98	36.1792	30.8079	37.4641	32.1082	35.1734	30.4248	23.4003	33.0626	31.9782	37.2218	22.5413	25.9977	32.9517	32.0395	30.7718	30.9392	20.5317	27.9364	12.9573	9.93371	17.0172	25.9992	27.9177	28.0896	52.0662	58.021	51.2783	45.5364	52.3725	48.6461	22.5556	21.7465	19.9921	25.1798	28.3431	22.8064	7.34349	13.9634	12.8776	8.81934	10.6476	6.82394
99	38.1507	31.1546	38.4651	33.7678	34.8783	30.0969	23.5538	32.7935	32.2084	36.9656	23.445	25.4803	34.0655	32.2219	29.3788	31.0899	22.1668	27.6748	14.1444	10.9051	18.1209	26.1792	28.1469	29.4016	52.1502	55.6572	50.7495	45.5258	50.1721	48.8301	20.2484	21.3729	20.2689	26.8437	26.7708	23.5662	6.8048	14.2926	12.0706	9.36549	10.7663	7.28302
100	36.9088	31.9319	36.8284	34.255	34.6613	30.1885	23.2216	33.7615	32.5421	35.2518	24.3043	25.3435	34.4392	31.4267	29.6844	30.7993	22.0862	26.7615	14.4486	12.0709	18.7656	26.0107	28.972	28.6511	51.3773	55.5915	49.6923	44.3713	50.578	46.7593	20.6369	22.1846	19.7129	25.2076	26.8776	25.0246	7.18344	13.6129	13.2365	9.57824	10.4798	7.53758
101	35.3849	32.0881	37.8015	33.5845	35.8793	30.4781	24.0858	33.9262	33.5408	33.8425	25.2832	25.2125	32.7976	32.4899	28.7784	29.982	22.1948	26.0867	14.7533	12.3016	19.5473	27.578	27.8591	29.1936	51.8006	54.0856	51.2209	43.9146	49.9784	47.0188	20.1343	23.1559	20.0633	25.7359	26.2842	25.5319	8.1282	12.7744	11.7425	9.93309	10.7197	7.98113
102	36.5036	31.2156	37.5968	34.5355	34.0305	31.6045	24.0099	34.7443	32.3697	32.5113	25.2971	25.9522	33.476	33.2819	27.6905	29.607	22.1605	27.3677	16.0239	14.8606	20.0817	27.372	27.4623	30.2453	51.2937	54.6791	50.7745	44.2521	49.3176	46.614	20.3147	22.4152	20.1303	24.4228	26.6673	27.3108	9.26903	12.3481	12.0318	9.21245	10.0119	7.78093
103	34.543	31.2895	37.1333	33.9982	33.7738	31.1918	23.1693	33.1769	34.0729	33.2348	24.1628	24.7945	32.9435	30.933	27.3067	30.82	22.5286	26.33	16.1066	14.8182	21.605	28.8786	26.8411	30.6826	51.7151	53.2834	49.6414	44.3178	47.413	47.628	19.5634	23.0113	17.8244	24.9593	25.8213	27.3722	9.40043	12.9263	11.3969	9.32387	10.6565	7.83616
104	34.3934	31.701	35.9404	35.3947	33.6123	30.6079	22.4152	33.0365	34.2355	32.8553	24.9182	25.3079	33.8527	31.7433	26.8922	29.2068	25.082	25.768	16.449	15.4463	21.9446	28.3517	27.6055	30.923	51.458	53.201	48.9709	43.7179	47.5127	46.5845	18.4529	22.3548	18.7156	23.7483	26.8234	27.0665	9.215	13.2682	12.6129	9.29192	9.81723	7.64243
105	33.6716	33.1214	35.4808	32.6121	32.9748	31.515	23.27	33.8354	32.5372	32.9364	25.4999	24.9019	33.9339	31.2702	26.6085	28.7948	25.2275	28.1138	16.7092	15.5509	23.731	28.5309	28.7104	31.3883	51.6337	51.268	49.1072	42.9983	47.9976	45.7848	18.1641	22.0208	19.6264	23.1709	24.9248	25.8243	9.68983	11.8879	12.7013	9.44538	9.88896	7.47502
106	33.0247	32.7198	36.3417	34.1744	32.4552	27.6341	23.5354	32.983	30.7293	33.7666	25.2518	24.6501	32.1287	28.8129	26.3251	28.3087	24.6067	27.5919	16.1951	16.7999	24.4761	28.7417	28.8208	30.7842	50.7523	50.1808	48.6509	42.4124	47.7585	45.5637	18.9485	20.2424	19.5528	22.6046	26.8873	25.6448	9.98579	12.5909	12.2006	9.69806	10.0004	7.93108
107	32.0455	31.1653	37.2641	33.4374	31.131	29.5848	21.7607	31.8259	29.9979	32.5547	25.9616	24.1738	32.984	28.2644	26.5119	28.4536	25.6105	27.981	17.6328	16.1261	24.4073	27.5872	30.1856	31.226	50.0451	49.8286	49.2952	42.834	47.3598	46.3992	18.5363	19.9925	18.6534	21.7954	27.7172	25.6606	10.4045	12.3109	12.1794	9.56394	10.1067	7.72829
108	33.4329	29.7464	35.03	34.0118	32.9575	29.9778	22.1208	32.148	31.1973	33.3375	25.469	25.1987	30.9325	27.3132	25.7229	27.8489	25.8277	28.198	17.5908	17.1033	25.074	28.3548	31.224	30.295	50.307	50.1166	48.2776	41.2869	47.1759	46.7733	19.0884	19.5373	19.2179	21.4271	27.2085	23.8505	10.4872	11.397	12.071	10.1248	9.69642	6.92491
109	32.6636	29.0346	34.5111	34.0079	31.1173	29.4486	21.275	34.1266	30.5879	32.0905	25.203	23.9576	32.0191	27.4028	25.7056	27.6314	26.3035	28.6763	17.0318	18.4998	26.0457	28.5366	30.727	31.5449	49.339	49.9945	48.8134	42.3808	47.1815	44.9788	18.4665	19.3736	17.9751	21.8333	26.2421	25.083	10.3002	11.6852	12.2586	10.1505	10.0012	6.10513
110	31.8277	26.0178	33.5117	34.1822	31.9867	29.5414	20.5947	33.5216	29.1892	30.5171	25.0373	24.6907	29.6414	26.176	24.2046	27.7654	26.9586	28.0701	17.2699	18.2595	26.603	27.9288	31.0112	30.6334	49.2132	49.0109	49.5702	43.15	45.8297	44.4582	17.4405	18.6395	17.6964	21.8092	26.1272	23.8147	10.459	11.79	11.7308	9.37432	9.91841	6.53271
111	31.9688	27.5083	33.3086	34.0799	30.5867	28.6209	20.4811	32.2263	28.327	31.9304	24.7866	24.3444	28.733	25.2154	25.7612	26.8561	24.6981	27.0423	17.5388	18.1456	27.5293	28.3376	30.0065	28.6485	50.0502	48.7932	46.4355	42.929	45.0867	43.3895	19.2065	18.2896	17.3578	21.4855	26.76	24.2268	9.11799	11.8175	11.7917	8.67639	10.1263	6.59872
112	30.9331	27.3612	34.2024	34.3628	31.0532	29.3682	19.9466	33.2325	27.2306	31.8123	23.2408	22.3988	28.6121	25.5891	25.01	26.9419	24.7549	26.5199	17.2005	17.7772	27.3259	27.3082	29.0075	28.1397	50.4038	49.0136	43.9413	42.5145	44.1249	43.9696	20.5629	18.7464	17.7126	22.8733	26.3003	22.9544	9.19863	12.2773	11.9993	8.54354	8.62871	5.76729
113	29.1057	27.1273	34.2952	32.9499	31.5693	28.1837	20.4361	30.618	27.4852	31.4411	23.35	23.3748	26.7211	25.1744	24.8108	26.2338	24.6495	25.5438	18.2471	17.5835	26.9071	27.1295	29.2403	27.5968	49.5734	47.7227	42.9353	41.046	44.4835	44.3843	19.1648	17.5289	18.0487	21.8762	27.0471	22.8677	9.6403	11.7208	11.9734	9.0035	8.61975	6.36875
114	29.0275	27.0785	33.6986	33.1798	32.2736	27.5153	20.0409	30.9566	26.1652	30.4272	22.1773	22.1083	27.5031	23.841	23.3222	25.8426	25.2699	25.825	17.9993	18.2238	26.5125	27.1841	30.4202	27.1656	48.3618	47.4467	41.0088	41.8849	44.4049	44.689	19.95	18.8755	17.4944	20.9714	27.2418	22.7157	9.58341	11.5902	11.4932	7.14095	8.43745	6.52019
115	25.9643	27.7011	32.9929	33.2114	32.0629	28.8442	20.764	31.4156	25.6698	31.3218	21.7075	22.3583	27.2053	24.3641	22.4518	26.2519	24.4634	25.3766	19.0434	17.8293	25.5724	27.0916	28.8905	28.5788	48.5327	47.4787	39.3476	40.6432	43.8803	43.5088	21.1337	18.2487	17.4854	19.9343	26.1513	23.3666	9.09834	10.8381	11.4294	7.93558	8.16978	6.09391
116	27.7973	26.395	32.1103	31.5677	31.9623	27.3831	21.4838	32.3988	26.0105	31.6109	21.4088	21.7456	26.0471	23.5943	22.8085	26.7081	23.975	25.2603	19.5035	17.5999	26.4758	26.9028	28.0068	28.0576	46.5289	46.5045	38.5465	40.4007	43.5007	40.7143	21.7377	17.4706	18.8859	19.5203	24.6044	25.9021	9.2719	11.5738	11.6274	8.4153	8.02249	6.6177
117	26.0387	25.1224	32.5645	30.4708	31.1495	26.1422	21.0324	31.2626	25.9955	29.7567	20.0937	22.4835	26.0872	23.6719	21.2905	26.2902	23.1072	25.9975	18.3015	17.2881	25.1657	25.9323	28.1668	27.0219	45.9369	46.4863	37.1608	39.4989	43.4939	40.4248	22.2532	16.3596	18.8063	19.7853	25.1817	26.0901	8.61204	11.4584	10.895	7.74092	7.96614	6.16596
118	26.2718	25.6543	31.0432	30.6825	29.2979	25.357	21.5155	31.1505	24.8924	29.0986	19.0816	22.1306	25.5823	23.1314	21.0913	27.3123	23.0977	24.5694	18.0899	17.4801	24.1377	26.7144	28.6785	26.2049	45.6486	44.5455	36.4509	38.3859	42.2994	39.4216	22.1063	18.4394	19.55	19.4774	23.8636	24.8229	7.85067	10.8827	11.3298	7.5101	7.46196	5.68402
119	26.3627	24.7932	29.3666	30.1579	28.2202	25.8206	21.3903	30.5798	25.048	29.1701	18.5712	21.3859	25.1124	22.2524	20.3361	26.7176	23.3131	25.4497	16.9869	18.112	24.8598	26.1062	26.7808	26.2674	45.0529	44.6162	39.2171	37.4469	43.15	39.4256	21.7595	15.7921	17.5537	21.229	23.2301	23.878	8.66444	11.7782	10.1976	7.7035	7.4944	5.70861
120	26.258	24.9106	28.7952	28.7668	27.1708	25.7417	22.5803	27.6471	23.4894	28.2369	18.4091	22.1065	25.0114	21.6946	18.3943	24.9662	23.3919	26.3523	17.8535	17.6595	25.1021	26.5261	28.3114	26.353	44.5936	44.1326	40.8158	37.5505	43.4272	38.8172	22.7352	16.9157	19.1651	21.2662	23.8789	24.9467	8.81876	11.0194	10.4281	7.41087	7.3642	6.82394
121	26.0698	25.2291	27.0827	28.0142	27.4412	24.491	21.6106	29.0936	24.34	28.4317	17.6854	22.5539	24.0659	23.106	18.8777	25.0307	22.7129	27.7648	17.4482	18.099	25.6399	27.3566	28.1261	26.0971	46.055	44.4972	43.2026	36.8677	42.5516	38.5708	23.8286	16.7585	19.5223	20.1323	22.3026	23.9647	8.51912	11.0698	10.677	6.75373	7.37615	5.89026
122	27.6933	24.1592	26.6717	27.9967	27.3764	24.4957	21.8138	27.9513	24.1933	26.699	19.8805	22.4915	24.6942	22.6485	18.1537	24.8006	21.9609	25.6383	16.9968	17.4709	25.1748	26.3584	26.916	25.4171	45.2058	44.5312	43.2488	35.8325	41.8062	38.0918	22.6468	17.3616	18.5567	18.6796	22.4873	23.4307	7.73237	10.3987	10.2626	6.82562	7.17294	5.67366
123	28.5927	26.4956	25.9532	29.119	29.2834	24.7198	20.4562	28.8198	24.0996	27.6902	19.6566	21.2309	24.5578	22.8763	17.5817	25.4003	20.6349	25.9373	16.8115	18.6145	25.6429	27.0714	27.281	24.4493	44.6076	44.3035	43.4641	35.8939	41.2896	38.8092	23.0466	17.3252	19.2106	17.7858	22.2508	23.6771	7.11754	10.0073	10.3039	6.9404	6.20001	5.93125
124	26.3844	25.684	24.8029	29.905	28.6132	25.1463	21.5446	29.7543	22.8384	27.7863	19.332	20.189	24.7732	22.7787	17.1201	23.6869	20.2974	24.6341	16.5484	17.7742	27.2861	26.3491	25.6094	24.9345	43.8498	43.9973	44.3723	36.1145	39.7258	37.2259	23.3497	16.3858	19.2249	16.5507	22.9334	21.6957	7.71436	10.4114	9.77529	7.49034	6.86087	5.45232
125	26.8245	25.0973	25.0049	29.2812	25.8003	26.1134	22.5837	29.354	23.1005	28.1061	19.9298	20.1881	23.5554	22.8384	17.5817	23.6697	19.4679	24.2601	17.0704	16.3655	27.1961	25.8144	24.7541	25.0507	41.7839	43.2217	43.1448	35.91	39.4351	38.7764	21.6146	16.0865	18.4376	18.9985	22.5969	21.6481	7.94154	8.2155	10.0704	7.55382	6.08431	4.43881
126	25.0812	25.9256	23.4301	28.3041	27.9561	24.1264	24.5359	29.5861	23.0594	28.0004	19.8174	20.4368	23.3085	20.6831	17.1641	24.1075	19.2634	22.6087	16.4465	16.7554	26.4199	25.3324	25.9845	25.591	42.439	42.8409	43.788	35.6073	38.8589	36.942	21.3956	15.2087	18.128	18.1753	23.5806	20.9097	8.0013	9.85127	9.83115	7.51178	6.06126	5.31512
127	26.4881	26.0178	24.878	29.5785	28.1691	23.9094	24.4201	28.0969	23.8186	26.6854	20.627	19.6284	23.211	21.2682	17.2815	23.8362	18.5073	22.6631	16.9798	17.4373	25.4396	24.1027	27.6676	26.2235	42.4068	42.3209	43.3701	34.4833	39.333	36.6414	22.4695	15.5447	19.4492	19.0936	21.7911	21.2952	8.31691	10.4057	9.67691	7.39532	5.2561	5.87084
128	25.5662	25.0264	23.6677	30.5225	27.3968	23.3258	24.1466	26.9533	23.96	25.2656	20.1626	21.0254	23.0086	21.1741	17.2611	23.7203	17.9919	22.0235	16.9948	16.6	26.0496	23.5745	27.9687	26.2062	42.1878	41.3722	42.7431	35.0089	38.5265	36.827	22.3522	14.9372	20.3108	18.8768	21.8276	22.2531	6.11834	9.44386	9.99331	7.67491	5.84097	5.40357
129	26.4361	23.2234	22.2423	30.2544	27.6141	22.9265	24.2285	27.7788	23.5826	26.7135	19.5187	19.9074	22.8084	18.7129	17.0783	23.514	18.3464	21.9932	15.9037	16.1353	25.6831	21.5552	27.57	26.5673	41.3625	40.4594	42.1954	34.8959	37.9459	36.3891	19.7399	15.1042	20.6001	18.05	20.5312	20.2455	6.99637	8.54183	9.47723	7.35832	5.0149	6.23327
130	25.2867	22.5254	22.4311	28.4792	29.0016	22.732	23.2117	26.4909	23.3899	26.6977	20.635	19.1792	21.4024	19.0625	17.3362	23.6246	17.7463	20.4367	16.6822	17.4629	24.4899	22.6498	26.9954	25.516	41.1174	39.5326	42.8444	35.0699	35.8162	37.1903	20.0411	14.3921	19.3919	18.1986	21.647	21.5876	7.09298	8.91935	8.98199	7.07368	5.00721	5.69955
131	25.8745	20.3803	23.4173	28.5952	28.4348	22.0151	22.9339	26.114	23.0686	25.6052	19.6427	19.8708	21.8823	18.241	16.2848	22.8331	17.7801	20.668	15.0791	15.8177	24.3839	21.3831	26.2301	26.0931	41.6332	40.4988	41.8896	33.7289	35.8202	37.6219	18.8671	15.7223	18.2861	17.3281	20.41	21.7961	6.38154	9.03604	9.32841	7.20233	4.40655	5.63699
132	22.5388	21.3153	21.008	28.9018	28.8911	21.6762	23.6378	26.2674	22.4893	23.5874	18.3092	19.7781	22.0799	18.3789	16.593	22.6526	18.5776	21.8719	14.6248	16.258	24.8088	21.3972	25.4183	25.6748	41.1732	40.326	40.4958	33.2542	36.2578	36.4581	18.2405	16.3927	19.0814	17.4518	19.3986	21.5421	6.60259	8.30926	8.473	6.39635	4.436	6.28246
133	24.2143	22.4652	22.5723	29.0474	30.1198	19.7996	22.4521	27.3506	22.256	23.2658	19.5939	19.6988	21.8253	19.4429	17.8143	22.1444	17.7846	20.3565	14.6768	16.1798	23.0561	22.512	24.8286	25.6575	40.3376	39.9602	37.5502	32.928	36.1526	36.5452	17.7043	15.6509	18.7973	16.1889	19.3938	21.2166	6.89445	9.18386	8.25623	6.41023	4.42149	5.49115
134	24.2663	22.6702	22.163	28.8898	28.3079	20.979	21.6415	26.6443	22.332	23.325	19.0172	19.6248	20.6718	17.6082	17.4874	22.4508	18.1883	21.8639	14.3817	16.7319	22.1778	22.4011	25.0919	24.9429	40.7294	41.1456	36.3604	31.5526	36.2566	35.9248	17.8251	16.2919	18.3746	16.3747	20.1586	21.6744	6.31809	8.67941	8.35128	5.78083	4.50687	5.149
135	23.8753	22.5841	22.3951	28.2582	28.6561	20.8132	20.3204	26.0223	22.1972	22.6888	17.9644	19.1329	21.0783	18.1313	15.7925	22.7866	19.4274	20.2945	15.9166	15.9698	22.7892	21.847	23.443	25.3586	40.6479	39.6219	34.2845	31.4712	35.9572	34.9834	17.0349	15.7562	18.1089	17.0276	20.5955	20.3955	6.09623	7.98579	7.55715	5.32171	4.52352	4.59587
136	22.7753	23.356	22.0743	27.9247	27.451	22.0889	21.2536	26.1996	22.7478	23.2965	18.1014	20.3454	20.8233	16.9647	16.3756	21.4517	17.1322	21.4931	16.5039	16.0601	21.9446	21.0649	22.4635	25.9596	39.4797	39.922	32.2355	31.4454	36.8952	35.8781	16.8159	16.4433	18.7136	16.3833	20.2148	21.2505	5.52725	7.42771	8.13492	5.03665	4.06246	5.79749
137	21.102	24.2476	20.9225	26.9371	28.2721	22.4558	22.1182	24.1315	21.9086	24.6316	17.5954	19.9056	20.7297	18.0533	16.1492	21.9761	17.1894	21.2377	16.1074	15.0942	22.1631	21.4474	23.4053	25.2681	40.2837	38.0813	31.1201	30.2612	36.4849	34.4944	17.2106	16.0975	18.89	15.2347	20.1366	19.3675	6.23049	7.72947	8.44299	5.63031	3.74739	5.42341
138	19.0079	23.2951	20.912	27.3158	28.3338	21.1881	21.1185	24.4075	20.8683	24.8058	18.6889	21.1823	20.5169	16.5593	17.9122	21.8132	17.8179	21.0215	16.8726	15.5589	21.7335	21.5952	22.4174	23.4375	39.1774	38.5607	29.677	30.4677	36.0148	34.8018	16.0385	17.8249	20.6347	16.3784	21.2089	18.4774	6.32915	7.95631	8.40839	5.81531	4.37111	4.88236
139	20.5752	23.449	22.1103	26.7722	27.5976	21.8068	20.9891	25.6163	20.8188	24.152	18.4932	19.8503	20.8306	17.6332	16.565	21.7852	17.9121	19.4994	17.4686	14.9572	21.6457	20.4482	23.1978	22.773	38.4291	38.9612	29.831	30.1494	36.5381	35.2074	16.6573	17.553	21.6308	17.3885	21.0552	20.022	5.80151	8.0857	8.29667	5.43691	4.59823	4.73048
140	19.1403	23.209	20.5619	25.4219	28.3562	22.0683	20.3894	23.4482	21.6589	24.7435	18.1753	21.0936	21.2704	17.3326	16.0789	19.6701	17.8869	18.4484	17.7076	15.0098	21.0127	20.799	23.1002	22.8848	37.9534	38.7401	29.603	30.7059	36.1946	34.036	16.4399	16.7193	21.1167	17.1141	19.4099	18.5004	6.57598	7.3884	8.18828	6.73354	4.61531	5.82252
141	20.1128	21.486	20.4578	25.6328	28.5287	21.428	20.5737	24.9973	21.9585	23.8133	17.2708	20.0847	20.7323	16.4519	16.2195	19.2888	17.5503	18.4506	17.9025	14.8455	20.4126	19.5495	23.3769	22.4794	38.1735	37.7155	29.4216	30.1959	36.3086	33.6312	16.0436	16.2841	21.0838	17.1709	19.0907	19.0336	5.98203	7.69836	8.48801	6.26433	3.99799	4.75939
142	19.0086	22.2008	20.103	26.6842	27.2046	20.5181	19.7991	21.62	20.2421	23.7089	17.136	20.1859	19.256	15.1193	15.1578	20.0099	17.4381	18.4394	17.8252	15.7416	19.8839	19.5429	23.5215	23.1124	38.8953	36.9288	27.9465	29.6848	36.2594	33.3162	15.7253	15.0295	19.2517	15.496	19.7788	18.1499	5.62549	7.14682	7.82769	5.96498	4.04367	6.15949
143	20.0903	22.6969	18.2075	24.3861	25.9056	21.2129	20.5921	24.2397	20.5369	23.3566	17.4176	19.0237	20.0806	14.9512	16.3124	19.6331	18.3145	19.4931	16.75	15.8362	19.4985	19.0178	23.435	21.1829	37.6823	37.7747	27.4381	30.2229	34.1575	32.333	15.5974	15.1487	19.3695	15.9219	19.9836	17.4204	5.69139	7.29422	8.12325	6.2925	3.85626	5.28534
144	19.8044	23.6197	19.3938	24.7339	24.9026	21.2342	19.9324	24.2867	22.8282	23.1328	16.72	20.4448	19.9499	13.9661	16.0909	19.2636	17.5079	17.8359	16.8061	15.4282	19.4725	18.2854	22.0485	21.701	37.3742	38.0821	28.1287	29.5237	35.0359	30.9421	16.0604	14.7249	20.1836	15.5413	19.2733	18.185	6.40406	7.04978	6.97895	6.45101	4.01507	5.50755
145	20.097	26.2205	20.4276	24.3709	23.3139	20.889	19.4965	24.75	22.374	23.0455	16.5252	20.7465	18.5884	14.3724	15.6906	18.6449	17.3867	16.8669	18.2425	16.321	18.8902	17.8273	22.0091	20.9487	36.6182	35.6587	27.5421	30.0766	33.067	31.9273	16.1574	14.7151	19.5549	15.5078	19.1641	16.6	5.58087	6.75825	7.33371	6.0806	3.85711	5.7647
146	18.2622	23.8422	18.8799	23.8082	22.4048	20.3492	18.9092	24.1358	22.3863	22.3251	17.6877	20.6819	18.0688	13.0077	14.9497	16.6791	17.6237	18.1867	16.9283	16.2815	19.4716	17.0984	20.9715	20.1259	35.6598	34.0663	26.1837	30.1232	33.4077	31.5389	18.5133	13.716	19.0712	14.9852	20.1795	16.9223	5.49818	7.0981	7.85521	5.8872	3.90066	5.51402
147	17.8188	23.9687	19.6681	22.5229	21.4957	19.405	19.1017	23.1261	22.8817	22.1215	17.9707	19.812	18.3657	12.7763	14.0166	17.0844	17.2043	17.1286	15.9062	17.6352	19.1675	16.9906	19.8595	19.3212	34.4438	35.9533	28.1622	29.8424	33.2258	31.0419	18.2495	12.7958	20.5136	15.1498	21.0227	16.2201	6.65867	6.39793	6.94977	6.32362	3.80076	4.90307
148	16.1743	23.574	21.3396	22.7432	20.6267	19.2598	19.226	22.3754	21.3743	23.2249	17.3997	19.8477	17.5725	13.1304	15.1743	17.1791	18.2158	18.0949	16.001	17.0457	18.702	16.8343	20.2555	18.384	34.1533	34.8882	28.7218	29.1353	32.4753	30.8423	19.5872	13.8491	21.3353	15.8557	19.6909	16.4355	6.10442	7.35892	6.30863	6.32362	3.47033	5.17618
149	16.1055	24.9677	20.5897	23.9674	21.3027	20.309	18.2679	24.2375	20.818	21.7029	17.8784	20.8699	18.2052	14.1449	14.1945	16.9612	17.8179	19.2105	15.0488	15.9051	19.2172	17.5887	20.6182	18.3454	34.0473	34.5144	30.4542	28.8076	32.0869	30.0422	19.2045	13.6086	19.7109	14.9897	19.6243	18.5492	6.36967	7.0809	6.51498	5.79975	2.76123	4.95829
150	17.3795	24.4404	20.2485	23.2187	21.5386	18.7757	18.2769	23.3187	21.1269	22.4264	15.7514	18.6864	17.7654	13.1388	13.7711	17.8849	16.0057	18.5705	15.5151	16.605	20.0877	17.1103	19.4458	17.4379	34.6826	36.1285	29.6754	28.5995	32.8867	30.0793	20.439	13.6225	20.5827	15.8186	18.4924	18.2104	6.32751	6.7517	7.10985	6.86556	3.44557	3.4732
151	16.5227	25.0492	19.6727	22.5482	22.8148	20.1555	18.2113	22.2837	22.2493	21.4001	16.5731	18.8713	16.9744	12.869	13.3899	18.171	15.858	18.9672	14.7595	17.0285	19.546	16.0337	19.1847	17.5794	35.2684	35.2702	28.9668	28.4717	33.5705	30.1364	20.6541	12.9995	21.0464	15.5025	18.8076	18.8561	6.72948	6.62395	5.7888	6.0827	3.32347	4.32275
152	16.2851	24.2788	18.7368	22.2533	24.3806	19.4642	17.0226	22.0825	21.4322	22.9402	16.033	20.0451	17.8051	12.7344	14.609	17.8574	15.9165	19.7218	16.5962	17.402	20.3477	16.3638	18.5227	16.1746	35.3476	33.6932	28.2269	26.1033	33.1571	30.4079	20.2812	14.8694	20.3595	15.9378	18.5852	16.8174	6.25587	6.15348	6.19358	7.29063	3.33286	4.61571
153	14.9897	24.2895	18.7383	22.7043	22.6965	18.6428	15.2629	20.8584	19.9858	23.0749	16.0012	18.931	17.9139	12.9292	15.1578	16.505	16.9294	18.722	16.6082	16.4958	20.1522	16.458	18.0509	17.1531	34.7926	35.1523	27.8764	25.3606	32.245	31.4998	19.9768	13.634	19.9552	15.8659	18.2684	16.5904	6.12038	5.83698	6.14439	6.38206	3.4413	4.78398
154	15.2756	25.1887	18.7673	23.3549	23.5662	20.2589	16.8867	21.4987	19.3265	21.4971	15.9802	20.5361	17.5704	13.6165	15.0013	17.2261	16.5221	16.809	15.8896	16.7705	20.3793	15.7555	18.4345	16.938	34.124	35.08	26.7922	25.3168	31.5778	31.9242	19.5377	13.8001	19.8767	14.7508	17.671	16.5125	6.26324	6.9425	6.75301	5.81446	2.84917	4.93758
155	13.7868	24.842	17.8956	23.6814	24.2607	20.2459	16.3123	19.7987	18.2226	21.9043	16.2569	19.919	16.5394	12.2331	16.3644	16.6895	16.4775	18.2117	15.348	16.4021	20.3685	15.9681	18.4961	16.3631	32.1557	35.4535	24.6678	24.5167	31.5544	31.2642	20.4963	13.4731	19.1712	14.9293	17.8653	16.3859	6.07699	5.93729	6.05143	5.62569	3.17362	4.31498
156	14.8928	25.0089	17.5536	23.5545	23.1583	21.0184	15.1772	20.9228	18.9288	23.1898	17.8954	21.4051	17.2096	13.4149	15.1752	16.3944	16.2504	16.9891	14.8493	16.0887	20.4464	15.6952	17.2533	16.9717	33.2194	34.0914	25.8448	24.3118	32.9022	31.4343	18.7591	15.3516	19.2992	15.2102	17.349	15.8402	5.64596	6.79346	5.9272	5.77873	3.31408	5.30174
157	13.8968	23.9969	17.5207	25.2624	22.2889	22.4187	15.3765	18.5482	17.7948	23.8809	18.0593	21.3329	17.0016	12.2924	15.4821	16.3353	15.2772	16.3793	14.272	15.1366	20.1842	15.8401	19.1798	15.9715	31.4386	34.5333	26.431	26.0665	33.0388	31.5177	17.0427	15.5406	19.7199	14.9554	16.6062	16.4968	5.43924	5.94548	5.80548	5.87753	3.47118	5.32806
158	13.5743	23.0543	19.4642	24.8639	22.972	21.1774	14.4223	19.1659	16.3921	23.4176	18.444	21.2585	16.6823	10.522	14.9448	17.2735	15.589	17.7468	13.641	15.9294	19.4405	15.2195	18.0177	16.3241	30.9896	33.7898	25.3984	26.6265	33.3629	31.5473	16.7536	14.6534	20.0734	15.416	17.7284	15.8168	5.57309	6.75743	6.15981	5.51805	3.40629	4.99109
159	13.7936	23.372	19.6913	24.0736	23.696	20.7347	13.8509	19.3189	16.9127	21.5046	18.714	20.6123	15.6246	11.7675	15.0377	17.2328	14.29	18.9061	14.4582	16.5777	20.2063	14.8559	17.87	16.1573	30.9786	34.5546	26.565	25.6293	33.914	31.5257	16.6484	14.8355	19.0387	17.195	17.5297	15.9757	5.48058	5.8902	5.90844	4.46948	3.05793	5.59902
160	11.751	24.0289	18.8792	24.5721	24.5685	21.2417	13.7142	20.2825	17.9747	21.4664	18.8801	20.3846	15.8231	10.9817	14.7291	17.4102	14.8415	18.4613	14.3455	16.4264	20.3248	15.1931	17.5987	16.6404	30.4141	35.0158	26.0046	26.309	32.567	31.0371	17.2184	15.8452	18.5884	17.6898	17.4445	16.1354	4.66272	6.17191	5.21561	4.74234	3.62999	5.13994
161	12.3141	24.9951	18.19	23.646	24.4439	22.3631	12.8195	19.2441	18.2115	20.842	18.5729	19.972	15.0692	11.6489	14.5543	17.4215	15.6074	17.6211	14.3414	14.7703	19.3401	14.8652	17.714	16.2868	30.0473	33.4052	24.9462	27.002	31.5878	30.1632	17.596	16.0412	18.5701	17.5747	17.2964	16.5658	4.70693	6.70256	5.77296	4.91599	3.0131	5.71638
162	10.9694	24.8123	17.7072	23.3572	23.4762	20.614	12.2348	19.4484	18.2067	21.7534	17.1369	20.5892	14.2333	12.246	15.3802	17.1453	13.9142	16.9365	14.1768	17.0579	18.5644	15.4875	17.4927	16.5579	29.0903	33.0785	26.156	26.5953	30.792	29.0901	17.2173	15.913	18.8583	17.6535	16.0726	16.9223	4.2411	6.49743	5.7417	4.9143	3.77216	5.74744
163	11.6844	24.5562	19.9521	23.0039	25.4851	21.3226	13.0304	19.0715	18.9464	21.9012	18.0813	20.9394	14.5962	12.8775	15.949	18.028	14.7703	17.63	13.7462	16.0126	19.2263	15.4422	17.8235	15.9054	29.5499	31.8108	25.7346	25.5843	29.908	27.0436	15.8324	16.289	18.6161	17.6482	16.7753	16.0673	4.59722	6.15799	5.507	5.15942	3.45453	6.02617
164	11.3413	23.6425	20.0581	22.0813	25.3475	21.4509	13.2173	20.5963	18.4183	22.2838	17.9474	20.0722	14.5785	11.9985	15.0133	17.2423	13.5443	16.6922	14.1261	15.6118	18.4324	15.1548	17.4994	16.3072	29.3937	30.9335	27.462	27.0286	28.0543	27.3419	16.0335	16.6234	18.0373	17.7074	17.6939	15.8334	4.37659	6.1801	5.39737	5.28849	3.05238	6.26822
165	10.6068	24.6118	18.936	23.2938	25.7421	22.1086	13.1698	20.4625	17.7921	20.4888	17.1328	19.7964	14.1388	12.0302	13.8022	17.5185	14.2147	16.4079	13.8667	16.0815	17.5195	14.5012	16.0424	17.1575	27.4826	31.9766	26.8323	27.1142	28.9664	26.9666	15.5784	16.5119	17.1371	16.2138	17.2687	16.9126	3.67252	4.68518	5.70626	5.56935	3.64067	6.31093
166	11.4161	23.7942	18.4946	22.5062	25.0881	23.1333	12.6708	20.2064	16.5132	22.694	16.5529	17.653	14.5569	10.7467	13.6083	18.2279	13.9719	15.3666	13.0259	15.482	17.5991	13.4035	16.096	16.195	28.6758	32.4734	26.8673	27.1009	28.8866	27.6321	15.7124	16.7642	17.9894	16.4604	16.0184	16.2435	4.18502	6.22186	6.39826	6.57504	3.27523	6.35279
167	11.3102	22.4538	20.0453	21.1754	24.9737	22.2309	11.9481	19.4336	17.0232	19.9531	17.058	18.1971	15.2353	11.7091	13.7426	17.5329	13.93	16.3294	14.0205	13.9456	15.9871	13.5676	15.4695	15.9023	28.1223	32.8886	26.6131	26.2609	29.7186	27.7075	16.6195	16.5519	17.8784	16.6985	15.8109	17.0824	3.57469	6.62681	6.40702	5.91957	4.42405	5.35136
168	10.6199	21.9646	19.1365	22.4222	24.7477	22.1646	12.288	19.5997	17.6936	21.6459	16.9251	18.0014	15.0489	11.5093	14.7798	17.6999	13.5785	16.5188	13.2541	14.5279	14.8038	13.859	16.6024	15.6942	29.1934	32.6466	26.706	27.0294	28.8001	27.0021	16.7582	15.5753	15.3697	16.5703	15.6607	17.7874	3.7372	6.27919	6.13313	5.49115	3.85711	5.32072
169	11.473	22.1939	17.6542	24.6238	24.6782	22.5039	12.8337	18.9025	18.2075	21.4168	16.171	17.4747	14.2186	11.483	13.3695	17.9549	15.5953	15.7959	13.2067	14.5409	14.3123	13.8449	15.5821	15.48	29.1872	32.2268	25.8525	26.5167	28.0062	27.1035	14.7059	16.4813	16.1756	17.5465	15.7639	17.7624	3.80024	6.49906	5.74211	6.01417	3.78454	5.65597
170	11.2837	21.2102	16.4857	25.2063	25.588	23.7149	13.3481	19.6379	17.5336	21.0807	15.9063	16.7225	14.4987	12.3655	13.023	17.0009	14.873	14.686	13.1602	13.7456	14.3647	13.1869	15.0186	15.6472	29.2679	29.9995	26.9232	25.6426	28.169	28.8493	14.9568	15.4692	15.1774	17.5253	15.2986	17.3324	3.05565	5.14664	5.54994	5.50376	3.64152	5.57097
171	10.4605	22.0347	18.5665	22.8708	25.6537	24.5107	13.1856	19.5823	17.1319	20.3024	16.2941	16.8517	14.1263	10.9354	13.3708	17.1494	14.8744	14.5657	13.3755	14.2661	14.4529	13.1196	14.9853	15.9706	28.5269	31.5745	26.7137	26.4662	26.9789	27.7263	14.1089	14.5559	14.8543	17.8797	16.0393	17.4143	3.19646	6.1801	5.40195	6.18487	4.00696	5.24694
172	10.8298	21.8259	18.9616	23.3526	24.5775	24.5588	13.4051	19.4923	17.5597	19.9215	14.725	18.7394	13.7275	12.3522	12.4457	16.2207	13.7552	13.9622	13.5101	13.4023	13.5124	12.6222	15.1463	16.1804	29.5789	31.0221	26.0115	25.7642	26.5429	26.6532	14.0973	14.3088	13.5311	18.6089	14.3004	16.673	3.00775	5.86646	5.48491	6.23995	4.08636	5.82338
173	10.7378	21.2422	18.2225	22.9833	23.6464	24.2913	12.2014	18.649	17.28	20.6385	14.8947	18.3642	13.0604	11.9767	13.2534	15.7328	13.8786	15.8699	14.1918	14.251	13.563	12.5109	14.9007	16.0052	28.4741	31.8471	25.8309	26.5781	27.6218	26.2711	14.8516	14.4297	13.8664	18.3178	13.7624	15.6454	4.11175	6.2583	5.43655	5.51469	4.5026	6.07104
174	11.1213	22.0217	18.5681	23.858	24.5225	25.2856	12.495	18.6469	16.9286	20.8614	14.9467	17.8633	13.3935	12.0917	13.8329	14.3772	14.3814	15.54	13.4528	15.771	12.7842	12.0237	14.4249	16.5015	29.0166	29.5912	25.502	24.53	27.5059	25.9585	14.7811	15.7844	14.3337	18.4897	13.3485	16.2423	2.53333	5.86728	5.56995	5.84179	4.29982	5.26765
175	9.72193	22.1375	19.5025	24.4036	23.4307	24.0708	12.2691	18.4143	17.0289	21.3558	13.6485	18.9938	13.2097	11.4562	14.7553	14.8817	14.1354	14.2002	12.6847	17.6343	13.7425	11.15	14.8798	15.9032	28.9487	30.6571	24.8549	25.4115	28.2508	26.1929	14.7188	15.4039	14.7097	17.796	12.5816	14.911	2.76665	5.405	5.54827	5.40075	4.0902	6.68242

## Sheet: Fig 2C SyGCaMP 60s pulses
Source Data	Figure 2C	AWC SyGCaMP Data: individual dF/F(%) traces - 60 sec stimulation
		Three trials per animal: Read from left to right; Trial 1 signifies a new animal
		Acquisition Rate: 5 Frames/sec
		Stimulus ON:	Frame 25
		Stimulus OFF:	Frame 325
Frame / Trial #	1	2	3	1	2	3	1	2	3	1	2	3	1	2	3	1	2	3	1	2	3
1	17.7237	9.38888	10.6069	14.1061	7.13654	5.16673	10.0686	7.78257	11.8056	3.57542	6.09703	9.50384	17.7213	14.5325	16.8257	4.89577	5.11989	4.27344	7.28925	5.37891	5.59549
2	16.5296	8.26907	10.3294	13.0018	5.4199	4.56262	8.45512	7.13338	10.8976	1.47705	5.08191	8.08553	17.1207	13.9406	16.7351	2.55515	4.2336	4.6993	5.43603	3.64373	3.87541
3	16.1047	7.25634	8.91512	12.2384	6.13535	4.46582	8.74072	7.37253	11.4777	1.89252	3.85823	7.6221	16.3639	12.9895	15.4787	2.16269	3.31693	3.99363	5.99353	3.82306	3.97984
4	15.3	7.62156	8.49176	11.1254	4.84149	4.06411	10.1735	8.21913	9.99794	1.50859	5.32111	5.92401	16.7934	12.6832	15.2807	2.81666	1.92232	3.48607	5.0872	2.98961	4.987
5	15.6765	7.56121	9.00107	10.7997	5.85825	4.21459	9.10687	8.81918	9.56207	1.17302	4.87846	5.52481	16.8555	11.2401	15.4416	3.67106	1.9142	4.97513	4.99797	3.19077	2.95981
6	16.4032	7.10293	9.34289	11.1797	5.55002	4.6625	9.85396	7.05294	9.76429	0.747463	5.8574	3.96812	17.4272	11.6566	15.6201	3.2179	1.16673	5.46642	6.6335	3.45419	5.121
7	16.7141	7.11267	8.95408	10.5875	5.43762	5.40917	9.76384	8.05216	9.37798	0.871935	6.2609	3.73791	17.8783	11.0106	15.2167	2.52384	1.8651	3.51282	5.77405	3.47045	4.57021
8	16.1047	7.49853	8.55563	10.4396	5.40736	5.63444	9.46343	7.55298	10.3874	2.04727	5.88762	4.43155	16.6607	10.9537	14.8626	2.65708	1.87923	3.97411	6.78628	2.58637	4.33177
9	16.0272	7.12552	8.65122	9.25896	6.30048	4.53402	8.9632	8.55785	10.3382	0.749145	6.45498	4.58717	15.902	10.6631	15.8163	3.32899	1.89159	4.91729	4.47066	3.67393	3.38852
10	14.6575	6.8588	7.79889	10.3687	6.38348	4.32987	8.43988	8.8931	10.4325	1.21213	4.47283	4.37249	16.4453	11.0197	15.2114	3.57638	2.05302	4.73906	5.4829	2.73038	3.82104
11	13.599	6.89424	8.06881	9.28879	6.36057	3.99151	7.58743	9.26356	10.0829	1.66965	5.05637	4.61132	17.776	10.2398	14.9356	2.84949	2.77788	4.57169	4.44633	2.84978	3.81389
12	13.3676	7.07568	7.13454	9.23534	7.53166	4.99689	7.6806	8.45697	8.77041	2.47451	6.05872	3.80387	16.8247	9.8756	14.8342	3.50995	1.73439	4.09232	3.98978	4.40145	3.79338
13	14.2363	6.51811	7.9455	8.35226	7.05873	5.04001	8.45077	8.90049	8.99078	1.01449	6.62225	4.50613	16.4137	10.678	14.1739	3.88752	2.87997	4.77015	4.2958	3.13224	2.61074
14	14.2296	4.8641	7.18234	8.31663	7.39333	5.13505	7.26569	8.27087	9.33594	1.41902	6.45115	4.25092	16.1352	11.3096	14.129	3.62296	3.27207	4.43106	4.69105	2.46697	2.41808
15	12.4776	4.9813	7.46671	7.62998	6.32512	4.83014	7.19386	7.05468	8.93458	1.1747	7.43946	4.55743	16.1437	10.6906	13.7548	3.57142	2.58783	4.35948	4.17817	2.22539	4.55924
16	13.2386	5.25658	7.18675	8.82882	7.20744	5.04969	7.07195	7.42254	9.18195	1.59858	7.61439	5.24848	15.6673	11.0304	14.1245	3.4462	2.33279	2.8415	3.29528	2.35547	3.26167
17	12.327	5.19779	7.72338	8.06219	6.80238	4.07159	6.62048	8.49828	10.4515	1.6276	8.69506	3.70946	16.2069	10.4023	13.8719	4.10017	2.35505	5.25168	3.78111	2.96639	4.35228
18	12.4582	5.68527	7.17671	8.07006	7.39678	4.79362	7.14727	8.20174	10.236	1.77604	8.93043	4.90964	15.5587	11.432	14.0968	3.66228	2.1265	5.04273	4.01682	0.950143	3.85109
19	12.734	5.39286	6.21713	6.86335	7.70155	4.41127	7.92571	7.73735	9.01866	0.889596	9.09643	3.30509	17.1226	11.1532	13.528	3.72222	2.74291	4.65122	4.00916	2.54827	3.68132
20	13.1958	6.42389	6.53164	6.86998	6.98524	3.65316	7.77116	7.4695	9.25806	0.956878	8.68995	4.22376	16.3074	10.617	13.9397	3.2912	1.84249	5.07165	3.68106	2.49485	3.10621
21	11.945	5.45515	5.70983	5.8427	7.3086	4.04431	7.24175	7.17774	8.92175	1.41398	10.5755	4.15349	16.3572	11.1124	13.1971	3.0335	2.46738	5.01815	4.07631	3.76824	3.39567
22	11.9863	6.55277	6.28662	5.86259	6.93293	3.86172	5.61869	5.84458	8.86422	0.887914	10.487	3.56418	16.352	12.2515	14.2481	3.28242	1.89971	5.53619	2.30377	2.8312	4.64889
23	10.4288	6.22882	5.66766	6.6748	6.14183	2.8361	6.52339	5.86545	8.02566	1.59017	10.5031	3.75343	16.7533	11.784	13.8745	3.03159	1.44438	5.02972	4.44903	2.36662	4.72806
24	11.2141	6.28917	6.28461	7.34695	5.6395	3.01561	7.19386	6.23983	7.99734	0.662519	11.4791	3.67799	16.8466	11.1021	13.4991	2.92966	1.76901	6.01447	4.25884	2.0024	4.2612
25	12.4675	5.74834	5.68533	7.69462	4.31755	2.66362	7.31358	5.66978	6.94238	0.74494	10.7044	3.17576	15.5948	10.5045	12.1199	3.3477	1.35042	5.11359	2.40472	2.47301	4.19682
26	8.96224	2.14597	2.63468	4.47271	2.76474	1.37049	2.99211	2.99825	3.80274	-0.897166	6.58693	1.42249	11.6136	7.69644	7.5905	1.66066	-2.39009	1.37377	1.95314	2.10553	2.86539
27	4.68624	-0.316746	0.360053	0.727426	0.185238	-1.37286	1.17271	0.665013	0.1936	-2.49512	3.87227	-1.33955	6.96885	4.0227	4.33471	-1.92988	-4.96312	-1.0299	1.4682	0.650959	0.790036
28	1.07625	-1.85005	-1.50729	-1.2542	-1.95592	-2.87411	-0.872218	-2.11783	-2.32652	-3.30881	0.701775	-2.66259	3.467	1.05182	1.29113	-3.35427	-7.40898	-3.87932	0.226109	-0.122554	1.09285
29	-1.20207	-4.25865	-3.42644	-3.1774	-2.37741	-4.58612	-2.65418	-2.33959	-3.37351	-3.96565	-1.09437	-4.09038	-0.181378	-1.17272	-0.72882	-4.77788	-7.85231	-5.30259	-0.376007	0.207757	-0.453173
30	-3.23814	-5.03659	-3.88354	-4.1475	-4.11999	-5.63946	-3.17575	-5.09895	-4.62936	-4.36935	-2.06863	-5.50783	-2.08962	-2.36679	-2.84495	-5.6529	-9.36525	-7.26052	-0.205197	-0.128594	-0.858515
31	-4.77442	-5.43179	-5.68019	-6.52612	-4.22201	-5.5343	-3.94157	-5.0146	-5.40288	-4.07414	-3.75795	-5.93203	-4.18529	-3.59175	-4.8926	-6.27595	-9.45921	-7.56419	-0.485073	-0.755766	-1.24526
32	-6.14186	-6.80624	-5.6834	-5.79844	-5.81631	-6.69808	-4.87064	-5.35158	-5.84583	-5.4589	-4.08994	-6.41356	-5.41853	-3.88655	-5.47122	-6.27213	-10.2554	-8.48242	-0.987136	-0.172728	-0.785553
33	-6.55034	-6.86153	-5.86134	-6.72129	-5.09092	-5.91665	-4.46053	-6.156	-6.91981	-4.92695	-5.63752	-5.54964	-5.89085	-4.77095	-6.36161	-7.50639	-10.2289	-8.62269	-0.348064	-0.135098	-0.626278
34	-6.90515	-7.01805	-6.21882	-7.28694	-5.39742	-7.11695	-4.50972	-5.76031	-6.826	-4.88195	-4.92417	-6.72136	-5.96225	-6.211	-6.70782	-7.95268	-10.1657	-8.29661	-0.610363	-0.577835	-0.837056
35	-7.07622	-7.12201	-6.59157	-6.78594	-5.56558	-7.25951	-4.82101	-6.98041	-6.8229	-5.13889	-5.45748	-6.46055	-6.37395	-5.87616	-7.44401	-7.65452	-10.3169	-8.98637	-0.961898	-1.81824	-1.58908
36	-7.27934	-7.38405	-6.58996	-7.1303	-5.50463	-7.08615	-5.24941	-6.52516	-7.08399	-6.0821	-6.39599	-6.75542	-6.65808	-6.82997	-8.4145	-7.71904	-10.8761	-9.86303	-0.975418	-0.151822	-0.954843
37	-7.69267	-7.97199	-6.5996	-6.638	-5.93519	-7.34486	-5.47189	-6.95172	-7.38136	-6.84196	-6.77054	-6.8632	-7.30891	-6.0024	-7.95564	-7.38079	-10.9414	-9.40174	-1.05609	-1.01221	-2.11221
38	-7.32295	-7.64025	-6.61366	-7.89693	-6.50928	-7.24323	-5.69741	-7.78657	-6.73263	-5.67924	-5.70307	-7.196	-7.78681	-6.71365	-8.59602	-7.35559	-11.0396	-9.79	-0.249815	-0.438928	-1.87759
39	-7.35537	-7.891	-7.15952	-8.00923	-6.56764	-6.85295	-4.51974	-6.52733	-6.54456	-5.75283	-6.84588	-7.04296	-7.67301	-6.70488	-8.49235	-7.65337	-9.94705	-9.59587	-1.37878	-0.861224	-1.41121
40	-8.62256	-7.66206	-6.80806	-7.64042	-5.77654	-7.26523	-4.99734	-6.5456	-7.14328	-6.05308	-5.45918	-7.28912	-7.27582	-7.03019	-8.96318	-7.41248	-11.3621	-10.3532	-0.672558	-0.316281	-1.58098
41	-7.78324	-7.51644	-6.77593	-7.0727	-6.18031	-7.4179	-5.60859	-6.08469	-6.93973	-6.04131	-5.75414	-7.10202	-8.46405	-7.18083	-8.59714	-7.09561	-11.4907	-9.78783	-0.564844	-0.657741	-1.30487
42	-7.98897	-7.70333	-7.45073	-7.02587	-5.77481	-7.93533	-5.78884	-6.67126	-7.15523	-5.69186	-6.27256	-6.79163	-8.10107	-6.8334	-8.91976	-7.24908	-10.8312	-10.5065	-0.696895	-0.531378	-0.39404
43	-7.19101	-7.16328	-6.85546	-7.31802	-5.35592	-7.85789	-4.82014	-6.66169	-7.02823	-5.53122	-6.59944	-7.48268	-7.89541	-7.07939	-8.85651	-8.13555	-12.134	-9.85435	-1.04257	-1.05774	-1.70067
44	-8.56218	-7.61494	-7.24427	-7.67481	-6.04067	-7.62602	-5.76184	-6.41211	-7.50349	-5.33106	-5.48344	-6.66834	-7.3316	-7.14574	-8.80262	-7.43462	-11.8033	-9.72132	-1.13676	-0.901642	-1.53615
45	-8.71313	-8.25622	-6.99444	-8.07015	-5.26168	-7.15523	-5.27379	-6.76996	-7.43225	-5.64098	-6.50495	-7.57494	-7.8002	-7.59424	-8.62446	-7.72095	-10.7355	-9.50694	-0.629743	-0.891886	-1.6177
46	-7.68484	-8.24532	-7.11614	-7.1216	-5.80378	-7.4707	-5.49801	-5.98207	-7.1809	-5.73559	-6.62072	-6.805	-7.72545	-6.87421	-8.68397	-7.56442	-10.1576	-10.2459	-0.654981	-0.825452	-1.70449
47	-7.39041	-8.31112	-6.76629	-7.81239	-5.57898	-7.04303	-5.68914	-6.4782	-7.42826	-5.47319	-6.15551	-6.88992	-7.98541	-6.48178	-9.3236	-8.3627	-11.1622	-9.77482	-1.64198	-0.293517	-1.79986
48	-7.23499	-7.56588	-6.93539	-7.52688	-5.42682	-6.464	-4.71957	-7.00824	-6.88884	-5.55015	-6.61349	-6.76146	-8.02446	-7.5664	-9.56651	-7.3491	-11.164	-10.1848	-1.68435	-0.812908	-2.10077
49	-7.76535	-6.93745	-7.19768	-7.17796	-5.65161	-7.3431	-4.93334	-6.10295	-6.6667	-5.9181	-6.74628	-7.37663	-7.58933	-7.9348	-8.43321	-7.67819	-10.088	-9.41223	-1.41348	-0.994092	-1.15751
50	-8.16712	-6.97873	-7.44631	-6.55719	-6.0316	-7.25203	-5.14449	-6.46602	-7.22028	-6.16368	-6.61263	-6.29716	-7.82809	-7.59691	-8.72327	-8.08134	-11.8503	-9.94545	-0.892943	-1.16459	-1.74359
51	-7.19586	-7.29917	-6.73054	-7.16925	-4.97853	-7.11387	-4.87413	-7.29305	-6.47022	-5.59724	-6.50282	-6.89941	-7.17131	-7.75632	-8.72439	-7.91603	-10.4536	-9.04674	-0.152918	-0.33858	-0.976303
52	-7.45265	-7.57406	-6.63454	-6.89161	-5.71991	-6.82171	-5.13361	-5.54073	-6.368	-4.86934	-5.93631	-7.29602	-7.59193	-6.79488	-8.24233	-7.80188	-11.1152	-10.0687	-0.501297	0.726219	-0.361136
53	-8.28266	-7.31981	-7.17599	-6.27914	-5.72078	-6.28448	-4.82145	-6.75083	-6.44146	-5.4488	-6.46664	-6.74206	-7.91623	-7.56411	-8.95682	-7.43691	-9.29566	-9.81784	-0.966855	-0.651702	-1.61865
54	-8.39037	-7.78432	-7.27118	-7.53019	-4.93746	-6.62592	-5.39396	-6.43124	-7.29108	-5.57201	-6.6718	-6.86664	-7.48185	-6.8887	-8.03948	-6.97306	-10.4822	-10.2491	-0.250716	-0.647056	-2.1971
55	-6.98491	-7.55576	-6.52891	-7.2857	-6.53046	-7.20803	-4.28986	-5.71422	-6.51314	-5.13636	-6.77565	-6.35536	-7.6797	-7.05574	-8.35461	-7.37201	-10.0657	-9.81133	-0.398541	-0.239626	-1.68732
56	-7.6513	-8.42443	-6.79119	-7.34123	-4.63831	-7.29602	-5.36348	-6.08208	-6.97911	-5.0981	-6.82289	-6.79767	-7.17354	-7.07595	-7.94441	-7.66024	-10.627	-9.68806	-0.322826	-0.964359	-1.62676
57	-7.19735	-7.42065	-6.89322	-7.38474	-4.61626	-6.74692	-4.93508	-4.5876	-6.75254	-4.92358	-5.91205	-7.00373	-7.3197	-7.4291	-8.24084	-8.28329	-9.94705	-9.17001	-0.860944	-0.71349	-1.20616
58	-7.58943	-7.66907	-6.7454	-7.18459	-5.53013	-6.39404	-5.21067	-6.72996	-6.14187	-5.61659	-6.19297	-6.84983	-6.79866	-7.27999	-8.93773	-7.32352	-11.0396	-9.46175	-0.242153	-0.52859	-0.368289
59	-6.85111	-7.525	-6.34615	-7.01137	-5.4346	-6.10717	-5.27641	-6.41602	-6.65165	-5.29069	-6.44834	-6.74551	-7.60309	-6.35135	-8.42835	-6.69742	-9.91667	-9.69131	-0.780272	0.232844	-1.94722
60	-6.47543	-7.08035	-6.23489	-7.09383	-5.49036	-5.73714	-4.00078	-5.66813	-6.27419	-5.39203	-6.42749	-7.65814	-7.4309	-5.89103	-7.9897	-7.36895	-11.36	-10.3619	-0.630644	-0.0514746	-1.15418
61	-7.13101	-7.27893	-6.20878	-6.75279	-5.54008	-6.6708	-4.8258	-5.62508	-6.5273	-5.73391	-6.18573	-6.86923	-6.38213	-7.12248	-8.20229	-7.46402	-9.65527	-9.89412	-0.984432	-0.670285	-1.63391
62	-6.95025	-6.77159	-6.54417	-6.16932	-5.4186	-6.53	-5.10139	-5.48681	-6.13789	-6.23895	-5.60645	-6.97528	-7.32416	-6.90319	-8.28687	-6.97077	-9.68988	-9.47549	-0.554027	-0.299092	-1.33968
63	-6.78328	-6.9577	-5.91155	-7.51361	-6.13189	-6.16965	-5.23766	-5.6703	-5.53607	-5.65654	-5.59028	-6.4709	-6.7518	-6.38148	-8.3999	-7.11126	-9.65915	-10.0904	0.0057237	-0.213146	-1.24717
64	-7.30357	-6.94836	-6.31522	-6.00937	-5.14842	-6.37204	-5.78361	-5.44072	-6.44854	-5.32517	-6.05293	-6.30579	-6.96304	-6.71022	-7.8239	-7.05094	-9.56943	-9.92521	-0.458933	-0.962501	-1.76839
65	-6.72998	-6.99197	-5.80551	-6.06697	-4.83414	-6.31264	-5.13099	-6.38036	-5.49713	-5.85292	-6.30959	-6.29544	-6.90019	-6.10842	-8.44182	-7.28726	-9.44685	-9.33197	-1.40763	0.192426	-1.55141
66	-6.26448	-7.13564	-6.13206	-6.04252	-5.50895	-6.69104	-4.00426	-5.69205	-5.8715	-4.59684	-5.46429	-7.33568	-6.91061	-6.29834	-8.1832	-7.5083	-10.3656	-9.64938	-0.756836	-0.0928215	-0.948644
67	-6.11763	-7.4627	-6.12925	-5.61279	-5.47437	-5.86781	-4.00252	-5.69683	-6.02903	-4.8912	-5.62135	-6.38511	-7.05379	-6.32618	-7.85833	-6.96886	-8.80359	-9.62154	-0.624785	-0.200602	-1.56238
68	-6.61668	-6.09799	-5.2978	-5.68365	-5.07666	-5.91357	-4.90939	-5.17678	-6.1109	-5.26798	-5.41705	-6.70153	-7.41602	-6.63547	-7.78048	-7.3365	-9.62877	-9.7365	-0.0713435	-0.00734024	-1.67492
69	-6.81831	-7.03168	-6.60964	-7.00598	-5.02089	-6.23609	-4.45312	-5.19809	-5.48341	-4.75622	-5.85076	-6.96192	-6.97197	-6.36546	-7.58848	-6.92343	-8.6139	-8.86418	-1.61539	-0.842641	-1.39881
70	-6.23541	-6.62012	-6.58434	-6.9749	-4.91195	-6.24621	-3.61939	-5.67204	-5.9485	-5.16327	-6.18275	-6.34933	-6.46172	-6.58208	-7.83737	-6.64207	-9.91667	-9.36306	0.0620594	-0.098861	-1.16324
71	-6.15751	-5.93641	-6.02883	-6.20828	-4.835	-6.24181	-5.22068	-5.55595	-6.07063	-4.79659	-5.95334	-6.68903	-6.47622	-5.8365	-7.83962	-6.22097	-8.90391	-8.50267	-0.532395	-0.671214	-1.54426
72	-5.72928	-7.06205	-6.01718	-6.77475	-4.52116	-5.67334	-4.69737	-5.85249	-5.84937	-4.03588	-5.70605	-6.23983	-6.31853	-6.69191	-8.09187	-7.18532	-10.0166	-9.42416	-0.609462	0.0121718	-0.452219
73	-6.24174	-6.64582	-6.5996	-6.27168	-5.13588	-6.07681	-4.80403	-5.43594	-5.25508	-4.56026	-6.09635	-6.5084	-6.19804	-5.986	-7.71349	-6.83486	-8.97103	-8.90828	-0.343107	-0.425455	-1.01207
74	-6.03005	-6.48424	-5.31025	-6.45152	-4.74465	-5.88761	-5.51673	-5.82553	-5.59316	-3.98458	-6.41131	-6.42218	-6.16531	-6.09087	-7.99531	-6.5409	-8.85481	-8.85225	-1.34633	-0.432888	-1.05928
75	-5.70282	-6.30163	-5.94288	-5.33515	-5.19467	-5.23422	-4.16665	-5.33115	-5.65422	-4.51821	-6.7948	-5.91392	-7.30668	-6.13626	-7.74979	-6.59014	-8.47896	-8.122	-0.217816	-0.0686638	-1.07835
76	-5.9775	-6.61117	-5.78542	-5.75824	-4.64004	-6.93391	-4.95336	-4.47107	-4.70901	-5.85628	-6.10656	-6.27992	-6.72131	-5.84641	-7.49491	-5.92701	-8.97103	-8.94696	0.59522	-0.556465	0.143396
77	-5.6074	-6.53524	-5.828	-5.9037	-4.28469	-4.94735	-4.34385	-4.79458	-4.92673	-4.42359	-6.01761	-6.81189	-6.62573	-5.67518	-7.23741	-6.17173	-8.90568	-8.27962	-0.0965819	0.0957948	-1.08026
78	-5.54777	-6.09955	-5.24157	-5.93809	-4.37591	-6.08077	-4.19713	-4.82241	-5.19312	-4.35757	-6.32576	-5.7113	-6.15787	-5.96006	-7.27222	-6.25839	-8.14832	-9.31136	0.269825	0.0460856	-1.60959
79	-6.50822	-6.11279	-5.34078	-5.99362	-4.94913	-5.15635	-4.14358	-6.30166	-5.37278	-5.02156	-5.64561	-6.09455	-5.6439	-6.00964	-7.31264	-6.7795	-7.85831	-8.44483	-1.10161	-1.01825	-1.0383
80	-6.10198	-5.89202	-5.58459	-6.34585	-4.52678	-5.49558	-3.7056	-4.60369	-6.32906	-5.08632	-5.15869	-5.54619	-6.9028	-6.39788	-7.3714	-7.29871	-8.06673	-7.95245	-0.0159092	0.528776	-0.404055
81	-5.81612	-5.73783	-5.48659	-5.28708	-4.41049	-5.40098	-4.09961	-4.80545	-5.12852	-5.22467	-5.14762	-5.72553	-5.58849	-5.73811	-7.87031	-6.77263	-10.8047	-8.71849	-0.705458	0.257001	-1.26243
82	-5.81612	-5.54237	-5.16686	-6.38274	-3.94188	-5.20651	-3.91109	-5.92554	-5.22897	-4.73603	-5.72903	-6.2894	-5.75473	-5.63132	-6.78978	-6.86082	-8.92405	-8.50484	-0.49679	-0.687474	-0.549501
83	-5.19557	-6.04776	-5.2259	-5.07615	-4.92622	-5.10003	-4.55979	-5.5616	-5.61042	-5.02661	-5.08804	-5.44877	-5.50295	-5.44445	-6.92639	-6.43744	-8.35639	-8.24853	-0.323727	-0.667497	-0.961043
84	-5.56417	-6.0867	-5.20984	-4.65181	-4.86483	-5.35786	-4.42439	-4.98851	-4.49218	-4.04681	-5.49579	-5.52723	-5.87671	-5.75832	-7.01734	-6.06063	-8.60754	-8.82658	-0.738358	-0.874697	-0.599573
85	-4.94176	-6.10967	-4.80255	-5.84941	-3.56276	-5.36358	-4.03125	-5.55899	-4.54219	-4.42443	-5.36767	-6.13464	-5.97601	-5.32661	-7.14272	-5.78996	-9.23879	-8.21201	-0.278208	-0.518834	-0.78603
86	-4.59328	-6.09916	-4.67	-4.94603	-4.6984	-5.5321	-3.84535	-4.92807	-4.95461	-4.29702	-4.77435	-5.17674	-5.55464	-5.93718	-7.08396	-6.37483	-8.92617	-8.10031	-0.186719	-0.815696	-0.485123
87	-5.3331	-6.44413	-5.19297	-5.43626	-5.20245	-5.88321	-4.4048	-4.85328	-4.96877	-4.71921	-5.15869	-5.34013	-5.24671	-5.1916	-6.81299	-6.46149	-8.46271	-7.98896	-0.199338	-0.478416	-0.330139
88	-5.16277	-5.63582	-5.1283	-5.20627	-2.93377	-5.65574	-4.32034	-5.18635	-4.23774	-4.38448	-5.63241	-5.07242	-5.35084	-5.31059	-6.99488	-6.36986	-9.47758	-7.35704	-0.390879	-0.183413	-1.33968
89	-5.59734	-5.33134	-5.11826	-4.43964	-3.73741	-5.80269	-4.70825	-4.48673	-5.51041	-3.95388	-5.07484	-5.30564	-5.92246	-6.03329	-6.37135	-5.97359	-8.44222	-7.94269	0.0832416	-0.633584	-0.550455
90	-5.35024	-5.82699	-5.28294	-4.6427	-3.88785	-4.60064	-3.57978	-4.70631	-4.85372	-4.06279	-4.98461	-5.95142	-5.29208	-5.2797	-6.03937	-6.45004	-8.09322	-8.77199	0.00752645	0.42657	-0.828949
91	-5.20004	-5.08604	-4.59529	-4.96178	-4.12172	-4.73835	-4.13182	-4.36933	-4.37669	-3.87482	-4.86969	-5.74191	-5.47915	-5.58708	-6.09176	-6.50616	-8.68137	-8.4629	-0.206098	-0.167153	-0.795091
92	-5.3644	-5.35859	-4.26512	-6.11835	-3.46636	-5.06351	-3.55452	-4.77936	-3.92222	-3.40343	-5.25403	-5.63845	-5.42671	-5.48831	-6.83058	-5.87127	-8.0155	-7.16942	0.231066	-1.04891	-0.810351
93	-5.23992	-5.14133	-4.51737	-5.72841	-3.99765	-5.21575	-3.96943	-3.63796	-4.47492	-4.31552	-4.77903	-5.57163	-5.15968	-4.48454	-5.96526	-5.60709	-7.69511	-8.48351	0.790367	0.074889	-0.76934
94	-5.09718	-5.14133	-4.65915	-5.36706	-4.22633	-4.4902	-4.18668	-4.35628	-4.72848	-4.00224	-5.44429	-5.62034	-5.11505	-4.81328	-6.36012	-5.81133	-8.24617	-7.68638	-0.311108	-0.498858	-0.893327
95	-5.33161	-5.55483	-4.31533	-5.63848	-4.73731	-4.37404	-4.17318	-4.14583	-4.23862	-4.00981	-5.2851	-5.8402	-5.76365	-4.67027	-5.92783	-5.72925	-8.29527	-8.03813	-0.127679	0.335979	-1.59624
96	-5.20004	-4.9887	-4.64871	-4.98954	-3.48149	-4.42244	-3.65684	-4.16409	-4.89044	-4.59642	-4.80755	-5.39057	-5.85886	-5.61759	-6.34926	-5.86326	-8.23416	-7.64553	-0.207	-0.15368	-0.568576
97	-4.47141	-4.97546	-5.05078	-4.87269	-4.18267	-3.66126	-3.35643	-4.63935	-4.10985	-4.04597	-5.88396	-5.88805	-5.51188	-4.75264	-5.69803	-5.87013	-8.15433	-7.9116	0.0607073	0.345735	-1.2505
98	-4.36892	-5.13977	-4.38321	-4.29295	-3.53552	-4.37624	-3.4139	-4.29932	-4.23774	-3.01824	-5.24594	-4.99698	-5.28427	-4.90138	-5.52437	-5.98924	-7.17443	-8.199	0.14138	0.215654	-0.348737
99	-4.20717	-4.75975	-3.87149	-4.74712	-3.00034	-4.57952	-4.09873	-4.52195	-4.08949	-3.98626	-5.03866	-5.32202	-5.23853	-4.72976	-5.69653	-5.04856	-7.13133	-7.43838	0.0345676	-0.620111	-0.741681
100	-4.25562	-5.07903	-3.90443	-4.7061	-3.28393	-4.10389	-4.01776	-4.76892	-4.07755	-3.21588	-4.67262	-5.0125	-5.30101	-4.56119	-5.13213	-5.49103	-7.80532	-6.97529	-0.330488	-0.50722	-0.613879
101	-4.29773	-5.10239	-4.09642	-5.14743	-4.92146	-4.93239	-3.63071	-3.74188	-4.12578	-3.89332	-4.18358	-4.97801	-4.97299	-4.79192	-5.23431	-5.78728	-7.5909	-6.99337	-0.253871	-0.378069	-0.895234
102	-4.49862	-5.12887	-4.63184	-3.47079	-4.25097	-3.95649	-3.37776	-4.57108	-4.29792	-3.22681	-5.3166	-5.24917	-5.22216	-5.49899	-5.68343	-5.48034	-8.10346	-6.809	0.0800868	-0.595024	-0.0111111
103	-3.93621	-4.46656	-4.72061	-4.55195	-3.76896	-4.03569	-4.05171	-4.90589	-3.63724	-3.73101	-4.55983	-4.97628	-4.58955	-5.03715	-5.05615	-5.15202	-8.87106	-7.55985	0.334724	-0.0533329	-1.18994
104	-3.91161	-4.79246	-4.33702	-4.35635	-3.13825	-4.41364	-4.20627	-4.78806	-4.01427	-3.61621	-4.91012	-5.50179	-3.72079	-4.35373	-6.56148	-5.22646	-7.61952	-7.41814	0.145436	-0.429172	-1.25337
105	-4.17996	-4.08616	-4.50572	-4.89714	-4.08281	-3.58514	-3.3708	-4.48934	-4.06471	-3.1385	-4.47215	-4.92153	-4.72604	-4.47691	-6.4593	-5.00695	-7.98901	-7.3838	-0.143002	0.497185	-1.06309
106	-4.07337	-4.23412	-3.80039	-4.07747	-3.15165	-4.90071	-4.18929	-4.16887	-4.39793	-3.88491	-4.76924	-4.88489	-4.86179	-4.33504	-5.0846	-5.06116	-7.55805	-7.60576	1.10585	-0.329753	-1.20043
107	-4.86275	-4.71537	-4.46836	-4.88263	-2.95582	-4.18133	-3.57063	-4.17844	-4.0948	-4.18474	-4.32446	-5.16381	-4.02054	-4.04901	-5.27473	-5.57807	-6.82719	-5.83798	-0.548169	-0.531378	-1.11746
108	-4.10244	-4.36027	-3.72769	-3.494	-3.58481	-3.26042	-3.93329	-4.16018	-4.02223	-3.83235	-4.55685	-4.41887	-4.94621	-4.27402	-5.08422	-5.13942	-7.59691	-7.74964	-0.892943	-0.396652	-1.18994
109	-4.46433	-5.09499	-3.93776	-3.25531	-3.57443	-3.52134	-3.38429	-3.88363	-3.88948	-3.81973	-4.05589	-4.70943	-4.53451	-4.16571	-5.26537	-5.78041	-6.67212	-6.57944	0.166618	0.239812	-1.08455
110	-4.52135	-4.66397	-4.13779	-4.00287	-3.63625	-4.02645	-3.58413	-3.68883	-3.24385	-3.79282	-4.50663	-4.57967	-4.14624	-3.54484	-5.0715	-5.43644	-6.7025	-7.57684	0.382497	-0.248918	-0.360182
111	-4.84858	-4.31627	-4.42217	-3.8106	-3.09588	-4.03481	-3.51229	-3.27445	-3.56688	-3.30545	-4.25806	-3.89035	-3.9655	-4.1966	-5.15384	-5.55708	-6.75372	-6.64812	0.368976	0.554792	-0.353029
112	-4.08119	-4.36338	-3.68592	-3.73062	-3.16418	-4.4066	-3.48922	-3.27619	-3.34696	-3.92108	-4.46832	-4.47449	-4.72902	-3.90905	-4.92291	-5.88158	-6.65763	-6.1149	-0.596843	-0.488172	-1.87235
113	-3.87732	-4.19713	-4.01649	-3.53875	-3.48754	-3.6793	-2.76302	-3.63535	-4.15277	-3.45767	-4.49641	-4.51803	-4.19571	-4.6615	-6.20929	-4.63472	-6.36762	-6.35819	-0.0195147	-0.236374	-0.29342
114	-5.2962	-4.30342	-3.91005	-5.06372	-3.92416	-3.82229	-2.32112	-2.95355	-3.82222	-4.43789	-3.7588	-4.57364	-4.10496	-3.79655	-4.76422	-4.38848	-7.34999	-6.87334	-0.396738	-0.110011	-0.542348
115	-3.66898	-3.89226	-3.59755	-3.73849	-2.88795	-4.15097	-2.92019	-3.32402	-3.31642	-3.49215	-3.70262	-4.72409	-3.92757	-4.36898	-5.40273	-4.60227	-7.14582	-7.00855	0.0404265	0.301136	-1.08789
116	-3.72899	-4.89097	-3.43729	-3.88187	-3.2139	-3.95077	-3.54756	-3.85885	-3.34386	-2.88493	-3.64601	-3.82181	-3.90153	-3.74506	-4.79828	-4.7607	-6.43721	-7.00746	0.0422292	-0.327895	-0.850408
117	-3.59444	-4.39765	-4.24584	-4.42183	-3.80441	-3.88521	-3.32465	-3.6123	-3.78195	-3.21167	-3.63324	-4.46328	-3.6836	-3.37551	-4.60441	-4.42055	-6.52905	-6.04079	0.0791854	0.451657	-1.15227
118	-3.89708	-3.75092	-3.74778	-4.16283	-2.84256	-4.21784	-2.67856	-3.64492	-3.88859	-3.29788	-3.63026	-3.80025	-4.09604	-3.59404	-5.26911	-4.86951	-7.25603	-6.66078	0.153999	0.993348	-0.926231
119	-3.76179	-3.84242	-3.35455	-3.5342	-2.66618	-3.76157	-3.21276	-3.10139	-3.72796	-3.00478	-4.09505	-4.61545	-4.18306	-4.24161	-5.33386	-4.4278	-7.05185	-7.06856	-0.277307	-0.300021	-0.751219
120	-3.25007	-3.48537	-3.1027	-3.31084	-2.81619	-4.224	-4.03778	-4.54804	-4.27756	-2.94591	-3.43405	-4.06969	-3.93538	-4.65387	-4.47678	-4.33656	-6.78021	-6.44532	-0.104244	-0.0686638	-1.39786
121	-3.45878	-4.15235	-3.23324	-3.46955	-2.73621	-4.08453	-3.80486	-3.12922	-2.76505	-3.37147	-3.65623	-4.40249	-3.73566	-4.30377	-4.60778	-5.34023	-7.45808	-5.12364	-0.193479	0.656069	-0.76934
122	-4.03349	-3.79492	-3.30956	-3.24536	-3.23594	-4.18265	-2.87665	-2.9279	-3.70937	-2.93413	-3.56386	-4.6077	-4.01831	-3.80875	-5.13325	-5.08139	-6.97202	-6.83683	0.740791	-0.0830655	-0.147497
123	-3.46735	-3.43281	-3.36097	-3.43971	-2.86028	-4.03789	-2.5719	-4.17757	-2.99737	-3.24153	-3.93799	-4.08521	-3.71112	-3.86443	-4.43337	-5.12415	-7.50118	-6.15249	-0.127679	-0.145783	-0.398809
124	-4.5549	-3.98492	-3.19227	-3.37963	-2.60263	-4.60416	-2.9363	-3.58709	-3.38678	-2.56576	-3.81413	-4.18953	-3.86955	-3.255	-4.72492	-4.67061	-5.43258	-5.69012	0.729074	-0.427313	-0.0745353
125	-2.99999	-3.91912	-3.41761	-4.25068	-3.19055	-3.06859	-3.68905	-3.66796	-3.86514	-3.68307	-4.1955	-3.22732	-4.03095	-3.73629	-4.7238	-4.9241	-5.71447	-5.23426	0.377539	-0.552748	-0.648691
126	-3.808	-3.95806	-3.42644	-2.94741	-2.52266	-3.08575	-3.04993	-3.75884	-3.40404	-3.11201	-4.72668	-4.28092	-3.11756	-3.41785	-4.90345	-4.72558	-6.4637	-6.54726	-0.00914891	-0.0468289	-0.552362
127	-3.1118	-4.00439	-2.73076	-4.10606	-2.60004	-3.45226	-2.86969	-3.99538	-3.9886	-3.27433	-4.0295	-3.57522	-3.64529	-3.21229	-4.43075	-4.17774	-7.87456	-6.46773	0.723215	0.0186758	-0.196615
128	-3.26311	-3.62866	-3.02076	-4.25275	-2.40853	-2.88379	-3.0212	-3.98364	-3.19252	-3.08762	-4.19039	-3.42821	-2.80999	-3.80684	-4.56473	-4.34572	-6.60253	-5.93667	0.179238	-0.626615	-0.884266
129	-3.53518	-3.40361	-3.3686	-3.56527	-3.14041	-2.94583	-2.69641	-4.3428	-2.87214	-2.75331	-4.3866	-4.13823	-4.07298	-4.73434	-4.74251	-4.48049	-5.79819	-5.87883	0.0872977	0.534351	-1.10077
130	-2.90383	-3.43281	-2.62191	-3.90093	-2.76647	-2.99599	-1.99721	-3.61622	-3.22659	-2.86979	-3.64133	-3.78258	-3.31913	-4.02384	-4.80277	-3.9567	-6.34325	-6.27143	0.0674676	0.230985	-0.276253
131	-3.60563	-3.61737	-3.13202	-3.67633	-3.31376	-3.00259	-2.48003	-3.85493	-3.54697	-2.79032	-4.04482	-3.91665	-3.9298	-3.45064	-4.57971	-5.21577	-5.59189	-5.61493	0.824168	0.551076	-0.529949
132	-3.88515	-3.15364	-2.67212	-3.80521	-2.8391	-3.51078	-3.10305	-3.58709	-2.69823	-3.48711	-4.38958	-4.10159	-4.16633	-3.26568	-3.79635	-4.47743	-5.7286	-6.21359	0.396017	0.813094	-0.281498
133	-3.06484	-3.50796	-3.13725	-2.47749	-2.91259	-3.17903	-2.66071	-3.36924	-2.72921	-2.16207	-3.3302	-3.73429	-3.65682	-3.11542	-4.16052	-4.53164	-6.51068	-5.89691	0.241432	0.0865033	-0.95389
134	-3.43977	-3.16181	-2.62713	-3.753	-2.51833	-2.97091	-2.84183	-2.79528	-2.36546	-2.45853	-3.80009	-4.87196	-3.51736	-3.38276	-4.15229	-4.54691	-6.43297	-5.71904	1.01841	0.23656	-1.12461
135	-3.13267	-3.82334	-2.88179	-3.35311	-2.92599	-4.2746	-3.50794	-3.35402	-2.99914	-2.3841	-3.08972	-3.91406	-4.00827	-3.39687	-3.49245	-3.95746	-5.62051	-5.16666	0.45731	-0.104436	-0.488938
136	-3.66265	-3.52275	-3.54092	-2.9499	-2.91864	-2.59912	-3.8632	-3.07748	-3.14428	-2.70159	-3.26678	-3.64635	-3.45488	-3.48001	-4.21741	-4.48049	-6.29238	-5.07013	0.262164	-0.397581	-0.975349
137	-3.14981	-3.0014	-3.97793	-2.40746	-2.26674	-3.10423	-2.68466	-3.54012	-3.03144	-3.15785	-3.89671	-3.59074	-3.05582	-3.13182	-4.21516	-4.76261	-5.97764	-5.37778	1.19553	0.637951	0.155795
138	-3.37269	-3.37518	-2.6677	-2.50857	-2.74443	-3.71185	-2.51617	-3.94712	-3.30447	-2.6158	-2.5845	-3.61833	-3.19938	-3.15622	-3.48646	-4.06474	-6.61878	-6.44965	0.204476	0.54132	-0.835148
139	-2.96383	-2.9574	-2.70184	-2.64988	-2.83088	-2.20488	-2.88231	-4.24366	-2.59999	-2.96777	-3.41064	-3.44718	-3.22801	-3.50747	-4.17212	-3.72649	-6.78021	-5.54299	0.625416	-0.211287	-0.252886
140	-2.70704	-3.79492	-2.75406	-2.5786	-2.5607	-2.56612	-2.60847	-2.95007	-2.55176	-2.12927	-3.8784	-3.24112	-3.10603	-2.94571	-3.8495	-4.01625	-5.68374	-4.70935	0.0773827	-0.108152	-0.519458
141	-2.8509	-3.21593	-2.5472	-2.94078	-1.49163	-3.71493	-2.2223	-2.82224	-3.07348	-3.20074	-3.68942	-3.10834	-3.07739	-3.39611	-4.22302	-4.04336	-6.27189	-6.09104	0.521308	0.453515	-0.7846
142	-3.21802	-3.55234	-2.43514	-2.74188	-2.25334	-2.71395	-3.45482	-3.07748	-2.75089	-2.63431	-3.13611	-3.96708	-2.79921	-3.45674	-4.60104	-3.45314	-7.12921	-5.65686	0.294162	-0.201996	-0.432667
143	-2.89041	-3.1295	-2.5223	-2.94741	-2.52352	-3.49626	-2.17832	-3.61622	-2.59158	-3.06407	-3.40766	-3.03376	-4.00678	-3.44492	-4.46406	-4.17393	-5.45696	-4.61102	0.0336662	0.788007	-0.650598
144	-3.70178	-2.99244	-2.56086	-3.69622	-2.16126	-2.75707	-2.77434	-2.73397	-2.54379	-2.78611	-3.52939	-3.27086	-3.19603	-2.51361	-3.35322	-3.67152	-5.41845	-4.73104	0.316246	-0.525803	-0.339677
145	-2.76966	-2.72183	-2.85929	-2.73317	-2.23043	-2.70163	-2.97026	-2.50656	-2.68407	-2.62337	-2.7224	-3.61574	-2.93049	-2.48463	-4.17212	-3.86927	-5.58766	-5.00253	-0.145256	0.284876	-0.50849
146	-2.93998	-3.22139	-2.43192	-2.19529	-2.77987	-2.95639	-2.00331	-2.91138	-2.72213	-2.59436	-3.17229	-3.73343	-3.27264	-3.83621	-3.18143	-3.78337	-6.39835	-5.37019	-0.0303311	-0.514188	-0.242395
147	-2.81624	-3.27161	-2.43755	-3.34316	-2.57929	-2.04033	-2.94588	-2.79441	-2.5376	-2.35719	-3.49619	-3.85241	-2.69508	-2.77524	-4.28328	-3.90783	-6.10233	-4.93059	-0.0916243	0.370822	-1.03162
148	-2.92507	-2.9792	-2.50864	-3.10861	-2.38	-2.6066	-2.73603	-3.47186	-2.74204	-1.9699	-3.42894	-3.8994	-2.42991	-2.93732	-3.30681	-4.12048	-4.52616	-4.83298	-0.0479079	-0.616394	-0.353983
149	-2.18414	-2.83981	-2.63878	-2.2732	-1.62824	-2.69108	-2.3947	-1.66084	-3.18455	-1.763	-3.15101	-3.63514	-3.52628	-2.81795	-4.36038	-4.10063	-6.08184	-5.0752	1.02923	-0.213146	0.349882
150	-2.39062	-3.16921	-2.15397	-2.99093	-1.89194	-2.88555	-2.36336	-2.28263	-2.44644	-2.71547	-2.7424	-3.07342	-2.76053	-3.34462	-4.6875	-3.77956	-5.76534	-5.33801	-0.201141	0.407523	0.342729
151	-2.36155	-2.8145	-2.72192	-2.6677	-2.25247	-2.72935	-2.29979	-3.14661	-2.75708	-2.55988	-2.95607	-3.62393	-2.12755	-2.44954	-3.80272	-3.62685	-4.10332	-4.60668	-0.0790051	0.478602	-0.542348
152	-3.07825	-3.12404	-2.43232	-2.48992	-3.3358	-2.4944	-2.57886	-2.58917	-2.5907	-2.00942	-3.35531	-2.9303	-1.89511	-3.23479	-3.56842	-4.31518	-6.42484	-4.9841	-0.849226	0.37268	-0.39261
153	-2.60455	-2.84721	-2.644	-2.45884	-1.64683	-2.82219	-2.38948	-3.43446	-2.65177	-2.58258	-2.81604	-2.70785	-2.29156	-3.10893	-3.70728	-3.21148	-5.55092	-5.94969	-0.473355	0.328081	-0.813212
154	-2.12935	-2.91807	-2.72956	-3.12063	-2.15521	-3.31806	-1.58405	-2.23306	-2.29731	-2.95936	-3.20038	-3.06135	-2.37859	-2.29623	-3.47223	-3.35503	-4.81794	-4.95517	0.790367	0.20404	-0.383549
155	-2.50839	-2.51236	-2.60102	-2.95529	-1.9771	-2.90491	-2.02333	-2.43438	-2.56282	-2.39882	-2.51214	-2.56429	-2.68652	-3.3103	-3.07962	-3.5986	-4.94475	-5.01519	-0.515269	0.283947	0.127182
156	-2.16551	-2.60269	-2.3532	-2.2877	-2.24296	-2.91547	-1.88489	-2.03217	-2.75576	-2.25164	-2.50107	-3.17947	-2.56082	-2.03881	-2.83447	-3.36228	-4.97301	-4.53365	0.295965	0.347593	-1.19805
157	-2.28813	-2.39049	-2.5721	-2.51313	-2.17812	-2.67876	-1.80347	-2.41046	-1.97693	-1.81599	-2.8071	-3.88431	-2.33842	-3.25157	-3.29932	-3.3348	-5.87378	-4.74261	-0.0781038	0.224017	0.0790179
158	-2.32502	-2.45707	-2.89504	-3.13182	-1.49336	-2.43192	-1.10688	-2.61961	-2.46458	-2.27014	-2.25378	-3.38381	-3.3526	-2.93503	-3.61034	-3.27524	-6.06348	-4.08502	0.522209	-0.282832	-1.04879
159	-2.66008	-3.10107	-2.48815	-2.86205	-2.60955	-1.98137	-1.9946	-1.6991	-2.22651	-2.34541	-3.54556	-3.53168	-2.64524	-2.87973	-3.18217	-3.38443	-5.41845	-4.10129	-0.376007	0.418672	-0.404055
160	-3.1759	-2.84409	-2.23029	-1.82192	-1.20805	-2.12657	-1.64238	-3.15618	-2.42343	-1.47747	-3.20038	-3.40838	-2.82822	-3.07919	-2.18249	-3.2153	-5.37959	-4.53799	1.09909	0.253285	-0.340631
161	-2.50206	-2.86979	-2.11782	-2.3511	-2.57842	-2.91151	-1.71727	-2.55917	-2.35971	-2.18183	-2.53853	-3.50883	-2.13276	-2.559	-3.33974	-3.3787	-4.28489	-4.33844	0.24639	-0.3934	-0.63963
162	-2.33732	-2.6646	-1.69768	-2.38425	-2.50234	-2.17629	-1.05986	-2.07435	-1.75302	-2.30589	-2.71857	-3.19628	-2.92528	-2.82901	-3.38802	-3.69175	-5.54279	-4.25782	-0.050612	0.139465	-1.43553
163	-2.47187	-2.18958	-1.95153	-2.12111	-2.16126	-1.99193	-1.73425	-3.0853	-1.97605	-2.56997	-1.5383	-3.29414	-2.54817	-3.47848	-3.15186	-3.40237	-4.71585	-4.43496	0.118395	0.0632747	-0.692563
164	-2.78568	-2.4193	-2.05677	-1.6976	-2.22437	-2.06585	-2.34986	-2.04	-1.74284	-0.980007	-2.99012	-3.62652	-2.88066	-2.74854	-2.87115	-3.25768	-5.43046	-4.35977	0.592065	0.193355	-0.268146
165	-2.60231	-2.36985	-1.78886	-2.45429	-1.84136	-1.29806	-1.57055	-1.86998	-2.16943	-2.49133	-1.97372	-3.42649	-2.87694	-2.17839	-2.95911	-3.82575	-5.28775	-4.63235	0.247291	0.533422	0.048498
166	-2.46926	-2.93443	-1.32092	-1.96862	-2.4898	-1.58582	-1.76821	-2.6857	-2.1234	-1.96695	-1.77453	-3.24931	-2.49871	-2.14826	-3.40861	-2.42428	-4.94051	-4.41978	0.19411	0.180811	-0.466525
167	-2.085	-2.79737	-1.30204	-2.36436	-2.08863	-1.80405	-2.33723	-2.15131	-1.61274	-1.87612	-2.30103	-3.69937	-2.32578	-2.58455	-2.48116	-3.51575	-5.32025	-4.75887	0.179238	-0.172728	0.00605629
168	-2.22626	-2.7339	-1.6057	-2.06103	-1.83185	-1.83573	-1.8814	-2.11174	-1.98799	-1.95097	-2.94202	-2.28279	-2.47454	-2.70773	-3.74171	-2.70182	-4.76884	-3.06086	-0.291729	0.0544479	-0.336339
169	-2.0742	-3.05201	-1.51532	-2.02207	-1.85649	-2.58636	-2.21968	-2.14653	-2.18536	-2.20707	-2.80199	-3.3864	-2.13834	-2.23521	-3.32589	-2.6877	-5.2609	-5.07086	-0.348966	-0.178767	-0.141298
170	-2.52106	-2.86317	-1.41691	-2.55208	-1.40301	-1.99721	-1.37594	-2.53221	-1.65301	-2.00942	-2.55555	-2.3966	-2.97177	-2.54565	-2.58484	-3.50316	-4.0196	-3.99067	0.02961	0.679297	-0.296758
171	-2.47261	-2.48004	-1.96438	-2.57197	-1.98402	-2.53752	-1.12909	-2.34524	-1.7747	-1.69614	-2.20824	-2.71992	-1.87354	-2.33628	-2.87602	-3.44704	-4.28701	-4.67537	0.210335	0.989632	-1.17993
172	-1.84759	-2.70704	-0.729665	-2.1265	-1.23399	-2.01041	-1.75123	-2.13001	-2.41635	-0.92534	-2.53342	-3.08118	-2.44516	-1.75392	-2.75363	-2.99464	-3.59889	-4.17106	0.532124	-0.48492	-0.238103
173	-2.60604	-2.42125	-1.82179	-2.32873	-2.04108	-1.2369	-2.15264	-2.03435	-2.03711	-1.39884	-1.93456	-2.28193	-1.77536	-2.00372	-3.23794	-3.52644	-4.48907	-3.38912	1.00985	0.913442	-0.714976
174	-2.39919	-2.48588	-1.57316	-2.04528	-1.4082	-2.01921	-1.76211	-1.95651	-1.97428	-2.55483	-2.32018	-2.77036	-2.12792	-2.79354	-2.33894	-3.22294	-5.54067	-3.97151	-0.0168106	-0.46866	0.0837866
175	-1.54906	-2.27134	-1.47676	-3.03651	-2.37308	-1.38254	-2.71687	-1.99304	-2.3805	-1.27479	-2.02735	-2.36771	-1.50387	-2.28441	-2.54441	-2.44298	-4.26476	-3.55433	0.589361	-1.07679	-0.772678
176	-2.77823	-2.48705	-2.00576	-2.37099	-1.89194	-2.58944	-2.34289	-1.97956	-1.93932	-1.5128	-2.87733	-2.62939	-2.61214	-1.51328	-2.49464	-2.4594	-5.66749	-4.09153	0.606938	0.496256	0.80768
177	-1.9076	-2.88225	-1.49122	-1.99638	-1.36757	-1.58186	-1.59319	-2.37698	-1.50875	-1.73399	-2.44659	-2.42591	-1.40717	-2.86867	-2.73155	-3.32067	-4.04822	-4.38869	-0.186719	0.164551	-0.545209
178	-2.67797	-2.08562	-1.51773	-2.16421	-1.59971	-2.12921	-1.30584	-2.24915	-3.10623	-1.21634	-2.03331	-2.53196	-2.01152	-2.2581	-2.97595	-2.50597	-4.41771	-3.84932	0.304528	0.506477	0.25403
179	-2.68058	-2.5182	-1.61815	-1.71542	-0.953859	-1.72969	-1.51221	-1.62257	-1.71806	-2.21632	-2.59173	-2.20433	-2.18334	-2.05139	-2.93141	-2.65563	-4.54452	-3.84932	0.381595	0.131567	-0.219028
180	-2.34925	-2.32235	-1.74266	-2.25331	-3.05265	-1.86389	-1.6598	-1.9439	-1.3344	-1.89042	-2.66622	-2.16079	-2.17367	-1.7238	-3.5033	-2.61401	-3.42333	-3.35477	0.554208	0.452586	-0.0797809
181	-1.76448	-1.96608	-1.46793	-2.30635	-1.70173	-1.6703	-1.34198	-1.19732	-1.77072	-1.71128	-1.48765	-2.30434	-1.73519	-2.34467	-2.55639	-2.8992	-3.91328	-4.62367	0.832281	0.414956	-0.0297092
182	-2.6858	-2.53922	-1.52456	-1.75976	-1.34465	-2.08697	-2.30153	-2.0026	-2.33271	-2.16375	-1.73537	-3.20577	-1.93081	-1.86223	-2.85394	-2.39335	-4.17079	-3.362	-0.283166	0.209615	-0.713069
183	-1.76858	-2.71483	-1.84067	-2.25538	-1.32347	-2.33996	-1.44081	-2.10218	-2.25572	-2.6772	-3.00502	-2.70052	-2.19412	-2.05521	-2.78208	-2.6331	-4.0952	-3.39526	0.0133854	0.814953	-0.173725
184	-1.62956	-2.08172	-1.50006	-0.844368	-1.33385	-1.74201	-2.45565	-1.27863	-1.75302	-2.12002	-2.18824	-2.75182	-0.597166	-2.01821	-2.49202	-3.26608	-4.45869	-3.55541	0.318499	0.672329	0.165809
185	-1.90685	-2.50223	-1.39362	-2.17208	-1.18081	-1.31522	-1.72162	-1.45995	-1.82072	-2.4291	-2.49426	-2.30262	-2.01524	-1.89579	-2.62638	-3.10497	-4.6996	-3.29368	0.0985649	0.318789	-0.31631
186	-2.79127	-2.37842	-1.28718	-3.18735	-1.2543	-1.67953	-2.00592	-2.16001	-2.00791	-1.96359	-1.96265	-2.63629	-1.77164	-2.1147	-2.66718	-2.35594	-4.63213	-3.86414	-0.11506	0.587777	0.0470674
187	-1.36532	-2.00229	-1.85513	-1.67771	-1.68228	-1.4877	-1.40816	-1.51865	-2.0765	-1.27647	-1.66684	-2.29831	-1.01221	-1.59451	-2.2959	-2.90607	-4.39122	-3.63892	0.79893	-0.136491	0.511542
188	-1.93667	-2.69575	-0.917243	-1.72868	-1.54481	-1.69405	-2.65766	-2.40959	-0.984815	-2.16712	-1.94478	-2.20864	-1.83821	-2.58874	-2.48902	-2.36472	-4.40747	-3.79328	0.272529	0.642596	0.816741
189	-1.38582	-2.16933	-0.995969	-1.96447	-1.3961	-1.38518	-1.40467	-1.88172	-1.68089	-0.314754	-1.66003	-2.54231	-2.04499	-1.97779	-2.72444	-2.84231	-4.04221	-3.9885	0.198617	0.363853	0.00128756
190	-2.46851	-2.24603	-1.06024	-2.26657	-1.03383	-1.6087	-0.567024	-1.93912	-1.76674	-1.40052	-2.7756	-1.39947	-1.4492	-2.25314	-2.48827	-1.85429	-4.46257	-3.35043	0.218447	1.11553	-0.818458
191	-1.95605	-2.1557	-1.09438	-2.09874	-1.36757	-1.55326	-1.12996	-1.55604	-1.06801	-1.88705	-1.81368	-2.1401	-1.91036	-1.77337	-3.18666	-2.27348	-2.91501	-4.0937	0.846703	-0.0821364	-0.366382
192	-1.88896	-2.10002	-1.06546	-1.58447	-0.457152	-1.3271	-0.783402	-2.45351	-1.41361	-1.79244	-2.12397	-2.12371	-1.72627	-2.67303	-2.33482	-2.33074	-5.41845	-3.4437	0.256305	0.306246	-1.0445
193	-2.33173	-1.80489	-1.14338	-1.74443	-0.757165	-1.42478	-1.03592	-2.08044	-1.85082	-2.51951	-1.95159	-2.31641	-2.4883	-1.62731	-2.06722	-1.9024	-3.68473	-3.27524	0.478493	-0.150893	-0.160372
194	-1.69516	-1.76634	-1.15904	-1.91889	-2.02033	-1.61618	-1.53137	-1.88172	-2.02207	-1.62423	-2.43765	-2.59016	-1.50982	-1.64943	-2.02006	-2.85148	-3.14356	-3.55649	0.688512	0.0363295	0.563998
195	-1.85766	-1.76361	-2.02785	-2.20441	-1.22923	-1.31258	-1.44342	-1.5043	-0.929058	-2.17847	-2.50703	-2.09224	-1.57565	-1.69748	-2.38947	-1.52979	-2.97824	-3.26656	1.10224	0.420066	-0.571914
196	-2.10848	-2.62449	-0.963032	-1.33211	-2.24296	-2.08213	-1.41295	-1.85563	-1.49636	-1.36856	-1.75835	-2.07155	-1.59015	-1.88893	-2.44673	-2.49872	-2.46568	-3.28825	0.613698	1.116	-0.301527
197	-1.55912	-1.64603	-1.5591	-1.30227	-1.0896	-1.2677	-1.27972	-1.33168	-1.94419	-1.67427	-1.7907	-1.67408	-1.84081	-1.42633	-2.54591	-2.51628	-3.50316	-3.12955	0.103522	0.0855742	-0.126514
198	-2.9288	-1.59113	-1.29963	-2.09998	-0.976771	-1.75609	-1.15869	-1.98043	-1.0388	-1.32104	-1.63875	-1.3874	-1.56932	-1.55981	-2.76299	-2.05167	-3.96238	-3.13787	0.62812	0.409381	0.364188
199	-0.681037	-1.29988	-1.7262	-2.79409	-0.688862	-1.46966	-1.45953	-1.27602	-1.98313	-1.22559	-1.60257	-1.82971	-0.97688	-1.99991	-2.26371	-2.24103	-3.53354	-3.33417	1.03329	-0.165295	0.588795
200	-1.2632	-2.30405	-1.54665	-2.30096	-1.09997	-1.55502	-1.47303	-1.52561	-1.14014	-1.26806	-1.85327	-1.69693	-1.67941	-1.53349	-2.48827	-2.13757	-2.74757	-3.67435	-0.381866	-0.174586	-0.582405
201	-1.23711	-2.99867	-2.00736	-2.50981	-1.27289	-1.16299	-0.139927	-1.82607	-0.440523	-1.95097	-1.26846	-1.53958	-1.76978	-1.76231	-2.10202	-1.72106	-3.88502	-2.3881	0.197716	0.201253	-0.180878
202	-1.51626	-1.65732	-1.7278	-2.26781	-0.742899	-1.16607	-0.860027	-1.84303	-1.82117	-1.26806	-1.46084	-1.96033	-1.85941	-1.44578	-1.54698	-1.46985	-3.08033	-2.51571	-0.363388	0.0957948	-0.0335242
203	-1.88337	-1.24187	-0.790316	-1.79996	-1.08484	-1.82341	-1.19265	-1.89477	-1.05385	-1.48504	-1.35699	-2.37461	-1.17362	-1.03085	-2.15105	-2.28837	-4.0687	-3.31067	0.598826	-0.30606	-0.1227
204	-1.59266	-2.25694	-0.912824	-1.24757	-1.40215	-1.42082	-2.29631	-3.24271	-0.759575	-1.16251	-2.0282	-2.27201	-1.55631	-1.39124	-1.9089	-2.43115	-3.50104	-3.16896	0.939994	0.620297	0.0909397
205	-1.28332	-1.22707	-1.04296	-2.77627	-0.739441	-1.10139	-1.65762	-2.24436	-0.853831	-1.58218	-1.23824	-2.04094	-1.33279	-1.5415	-2.82362	-1.83482	-3.13967	-2.54029	0.889518	0.269545	0.239724
206	-1.61316	-0.897674	-1.26227	-1.80079	-0.716529	-1.02395	-1.67678	-1.26167	-1.4114	-1.3059	-1.88349	-2.50868	-1.73333	-0.673119	-1.97589	-1.3244	-3.22728	-3.23222	0.420354	0.12785	-0.789845
207	-2.36937	-1.21929	-1.0285	-1.63544	-1.09133	-1.64918	-1.1822	-2.35394	-1.03128	-1.7466	-1.6728	-1.30377	-1.36478	-0.863042	-1.68808	-2.02609	-3.29051	-2.92458	0.00752645	0.932489	-0.565715
208	-2.07867	-1.59502	-1.0988	-2.10537	-0.826332	-0.836072	-1.08337	-1.15471	-1.56274	-1.53551	-1.55831	-1.74047	-1.13457	-1.5476	-1.85089	-1.90965	-3.04783	-3.04134	-0.0334859	0.768031	0.256892
209	-1.99816	-1.17334	-1.38558	-2.05854	-1.03081	-1.40058	-1.2954	-1.62257	-1.53176	-1.76973	-1.10033	-2.14872	-2.21829	-1.01216	-1.82619	-1.55842	-2.32085	-2.86782	0.045384	0.945962	0.351313
210	-1.53191	-2.28224	-1.21608	-1.71874	-1.38356	-1.80713	-0.195655	-1.24037	-2.63097	-1.57966	-1.60172	-1.73788	-1.53585	-1.41412	-1.13079	-2.1914	-2.80656	-3.07135	0.59522	0.346664	-0.242395
211	-1.29525	-2.31417	-1.25263	-0.504565	-1.46959	-1.12295	-0.615785	-1.55691	-1.62469	-0.929545	-2.01713	-2.3121	-2.02788	-1.13038	-1.98076	-2.1223	-3.01109	-2.27241	-0.485974	-0.248918	0.621223
212	-1.54198	-0.979829	-0.753765	-1.7378	-0.372854	-0.660515	-0.937958	-1.59822	-0.984815	-0.99094	-0.695986	-1.81419	-2.06321	-1.69138	-2.15779	-1.84475	-3.30711	-2.77202	-0.143904	-0.0579786	1.11574
213	-1.9445	-2.43838	-0.877478	-2.01089	-0.912359	-1.62322	-0.973658	-1.44777	-1.25121	-1.63012	-0.931358	-1.00243	-1.69094	-1.0972	-1.5597	-1.85429	-2.96199	-2.88264	-0.348064	-0.385967	0.399
214	-2.48268	-1.46225	-1.31971	-1.44441	-0.725607	-1.89909	-0.975835	-0.589441	-0.941006	-0.943001	-1.69323	-1.40982	-0.589356	-1.58574	-2.09267	-1.77985	-2.29824	-2.76696	0.174731	0.0902199	-0.0287555
215	-1.62024	-1.80294	-0.644512	-1.98561	-1.59625	-1.02131	-0.560929	-0.455952	-1.49061	-1.60237	-1.35613	-1.75685	-1.74077	-1.48315	-2.00434	-1.60996	-5.4347	-3.34935	0.695272	-0.361809	-0.168956
216	-1.69963	-1.0616	-1.48198	-2.17664	-0.0451748	-1.35086	-1.29888	-0.907294	-1.64549	-0.60617	-2.37338	-1.91592	-1.83189	-1.35425	-1.85051	-1.62409	-2.48405	-3.90499	0.551504	0.516233	-0.155604
217	-1.11449	-0.580344	-1.13695	-0.976559	-0.932677	-0.561957	0.0511994	-2.37003	-0.681693	-0.883709	-1.38806	-1.82108	-0.768242	-1.96482	-1.7023	-2.18491	-4.34035	-2.84287	-0.94342	0.0535187	-0.221889
218	-0.766759	-1.39567	-1.1486	-0.926832	-0.6733	-1.82517	-0.307544	-1.76171	-0.626821	-1.25797	-1.22334	-1.76116	-1.90292	-2.02432	-1.34113	-1.52444	-1.82242	-2.91698	1.27485	0.433539	0.374679
219	-1.69665	-1.6616	-0.926481	-1.99555	-0.747654	-1.68525	-0.767294	-1.53604	-1.64593	-1.37781	-1.63066	-1.71158	-1.47188	-1.32793	-1.25654	-1.49963	-3.4092	-1.82053	0.45731	0.22634	0.927376
220	-2.21769	-1.303	-1.06506	-2.2475	-0.998385	-0.960589	-1.25142	-1.7665	-1.01712	-1.66334	-1.34805	-1.2197	-1.56598	-1.06059	-1.8086	-1.99937	-2.14705	-2.25181	-0.498593	0.0219278	0.818648
221	-0.614324	-1.28353	-1.01324	-2.49987	-1.22404	-0.641595	-0.925333	-1.88346	-1.11536	-1.29918	-1.16971	-1.45508	-1.08101	-1.17767	-1.39914	-1.39121	-2.08806	-1.8809	0.45055	-0.205713	-0.382595
222	-1.09734	-1.31663	-1.52657	-1.40338	-0.875181	-1.02483	-1.0751	-0.647272	-1.53663	-0.505667	-1.43573	-1.76289	-1.86871	-1.76498	-1.474	-1.17971	-1.9941	-2.15311	0.5817	0.215654	0.0337149
223	-1.22704	-1.89444	-0.980304	-1.14978	-1.54999	-0.447119	-1.91536	-1.2308	-1.0419	-1.86351	-2.50533	-1.32662	-1.18998	-0.995378	-1.24419	-0.735326	-0.901515	-2.1542	-0.099286	-0.307918	0.234479
224	-1.38246	-1.03317	-1.11526	-1.08679	-0.973312	-1.35834	-0.862639	-0.889032	-0.750725	-1.86939	-0.800691	-1.60985	-0.88316	-1.62388	-1.49795	-0.972787	-1.6511	-2.07828	0.160759	0.586383	-0.597665
225	-1.02802	-0.894559	-1.26107	-1.47673	-0.84665	-1.02483	-1.14258	-1.81259	-0.770638	-1.08808	-1.67408	-1.07529	-1.22717	-1.50756	-1.5728	-1.16062	-1.7327	-2.27133	0.597023	-0.0918924	0.407584
226	-0.372441	-1.81774	-1.14579	-1.139	-0.514647	-0.378041	-0.00888152	-1.84129	-1.4884	-1.43753	-0.825803	-1.23781	-1.74077	-0.951902	-1.68808	-0.429529	-1.13254	-2.93434	0.268924	-0.429172	0.074726
227	-0.795829	-1.89872	-1.15704	-0.928904	-0.687998	-1.49958	-0.766423	-1.50734	-0.864894	-0.849227	-1.64897	-1.54992	-0.678241	-1.47629	-1.47138	-1.18047	-1.87576	-1.59639	0.698878	-0.0129151	-0.184216
228	-1.63739	-1.60709	-1.53701	-1.33542	-0.937864	-1.13879	-1.02851	-0.393772	-1.00517	-1.0435	-0.836018	-0.343714	-1.42242	-1.26539	-0.832119	-0.957135	-2.82705	-2.52655	0.914756	0.0623456	-0.44602
229	-1.92735	-1.07795	-0.806383	-1.9164	-0.472715	-1.61926	0.0808044	-0.881205	-1.20519	-1.18774	-1.42126	-0.794641	-0.973533	-0.864186	-0.954506	-1.12855	-2.15553	-1.95573	-1.4261	0.424712	0.0613736
230	-1.16555	-0.681578	-0.524414	-1.66777	-0.294177	-1.49958	0.197483	-1.96695	-1.20828	-1.30843	-2.10779	-1.19341	-1.11077	-1.40154	-0.933547	-0.242844	-0.53626	-1.58988	0.861124	0.0604873	0.386124
231	-0.72688	-1.25044	-1.28195	-1.96323	-0.0780293	-1.46878	-0.241368	-1.45343	-0.747628	-1.5128	-0.92923	-0.265254	-1.00477	-1.12276	-1.08213	-1.72755	-1.53453	-1.82595	0.66778	-0.542063	-0.449358
232	-0.9546	-0.923372	-1.0755	-0.954597	-0.140712	-0.209084	-0.664111	-1.62127	-0.847636	-0.353442	-1.76261	-1.40033	-1.10891	-1.90685	-2.21618	-0.783429	-3.54166	-2.06418	0.528969	0.457232	0.404246
233	-1.07014	-1.15738	-1.71415	-1.33791	-0.0611697	-1.25142	-1.06552	-1.42951	-0.596288	-1.23231	-1.00797	-1.85428	-0.992128	-1.50298	-1.28312	-1.73365	-2.09831	-2.30893	0.802986	-0.0844592	0.773822
234	-1.26767	-1.74181	-0.619609	-1.0698	-0.274291	-0.723874	-0.595758	-2.03435	-0.693641	-1.66923	-1.2625	-1.15978	-0.152369	-0.390905	-1.28836	-1.06365	-2.20039	-1.322	0.47669	0.252356	-0.37115
235	-1.23897	-1.41553	-0.762601	-1.67233	-0.526751	-0.694394	-0.210022	-1.16558	-1.40653	-1.11583	-1.3489	-1.60467	-1.03936	-0.482815	-0.475438	-0.606288	-2.31873	-1.86246	0.356357	0.224946	-0.189939
236	-1.7287	-1.2664	-0.809596	-1.1879	-0.739441	-1.27342	-0.769035	-1.13079	-0.692756	-0.89296	-0.558083	-0.644188	-1.47002	-1.1567	-0.570129	-0.353175	-1.37734	-2.01574	0.928277	-0.0756324	-0.355891
237	-1.1566	-1.68029	-0.731272	-1.35656	-0.221551	-1.16783	-0.135574	-1.56691	-1.43928	-0.227708	-0.897308	-0.817058	-1.51279	-1.21276	-1.20751	-0.866655	-1.88601	-2.14878	0.0345676	0.171985	0.547784
238	-1.26394	-1.13012	-1.10562	-0.875447	-0.505569	-1.38826	0.451739	-0.795111	-0.690543	-0.828201	-0.658531	-1.6064	-0.734027	-0.977072	-0.589965	-0.695241	-1.38546	-1.94091	-0.261533	-0.358092	0.388986
239	-1.35153	-0.965812	-1.04216	-1.45435	-0.290286	-0.656995	-0.445992	-1.11862	-0.767983	-0.503985	-1.34677	-1.41973	-0.0233184	-0.815371	-0.898365	-1.30073	-2.46568	-2.18746	0.183294	-0.488172	-0.0826421
240	-1.24195	-0.856791	-0.729263	-0.984433	-0.271697	-1.40058	-0.96321	-0.444646	-0.76046	-0.272282	-0.470404	-1.82022	-0.851548	-1.5701	-1.14202	-1.09457	-1.90226	-0.970978	0.162112	-0.68097	-0.487984
241	-1.27624	-1.68535	-1.76355	-0.467684	0.0871074	-0.754673	-1.14519	-0.782501	-1.11093	-0.948048	-0.752169	-0.950267	-0.613158	-0.984318	-1.08962	-0.832678	-2.04921	-2.05334	1.12342	-0.151822	-0.16991
242	-0.877078	-0.953742	-0.113912	-1.55008	-0.106993	-1.59154	-0.0724453	-1.03513	0.637884	-0.922817	-1.05011	-0.610563	-0.414561	-0.616295	-1.14988	-0.846421	-2.18591	-1.4366	-0.561689	-0.0979318	-0.574775
243	-1.62323	-1.93493	-1.18475	-0.817847	-0.316224	-0.643355	0.515302	-0.694232	-0.588765	-0.695319	-0.938594	-1.59519	-0.467743	-0.951902	-1.23184	-0.990348	-2.57801	-1.2262	0.812901	-0.22476	0.0575586
244	-0.608361	-1.19008	-1.03533	-1.26995	-0.447209	-0.843991	-0.958421	-0.958168	-0.81666	-0.881186	-0.695986	-0.832147	-1.01853	-0.916434	-0.908096	-0.792974	-2.02059	-1.02159	0.422157	0.139465	-0.127945
245	-0.738806	-0.815518	-0.887921	-0.633442	-1.12937	-1.24042	-0.511732	0.109314	-1.19412	-0.939637	-1.34507	-0.779984	-0.741093	-1.24136	-1.19741	-0.604761	-1.602	-2.16071	0.766931	0.141323	-0.440774
246	-1.52073	-0.428103	-0.67785	-1.29647	-0.918411	-0.802632	0.380773	-1.26732	-0.370163	-0.593975	-0.253334	-1.88704	-0.646629	-1.20666	-1.84041	-1.14878	-1.63485	-1.04183	-0.0267256	-0.149499	0.0566049
247	-0.689609	-1.00475	-1.17632	-1.20448	-0.546637	-0.888871	-0.110322	-0.834244	-0.914013	-0.160846	-1.07437	-0.97096	0.0384177	-0.901942	-0.996425	-1.34119	-1.54689	-1.75509	1.11756	0.546894	0.181069
248	-0.830118	-0.915195	-0.970664	-1.20903	-0.32487	-0.985669	-0.330184	-0.297677	-0.640539	-1.03593	0.173571	-0.937334	-0.833697	-1.23526	-1.65589	-0.817407	0.0172737	-1.91416	0.453254	-0.457046	0.401384
249	-0.902049	-0.868082	-0.868239	-0.867574	-0.0417165	-0.653915	-0.768164	-1.56083	-0.498492	-0.154118	-0.806649	-1.01536	-0.754109	-0.800879	-1.15699	-1.54506	-1.57551	-1.13836	0.760171	0.548288	0.319362
250	-0.387349	-0.870029	-0.882298	-1.30103	-0.822874	-0.213924	-0.232226	-0.595528	-1.34723	-0.969914	-1.35188	-0.458386	-1.36849	-0.855415	-0.97584	-0.507792	-1.47942	-1.61374	-0.535549	1.20752	0.250692
251	-1.24046	-0.74115	-0.940137	-1.02546	-0.453261	-0.952229	-0.00235099	-1.40647	-0.714439	-0.648222	-0.715991	-1.26152	-0.690514	-1.07814	-1.11207	-0.642556	-1.41231	-0.837943	0.6804	-0.576906	0.086171
252	-0.812228	-0.489233	-0.893143	-0.645459	-0.458017	-1.04903	-0.859156	0.0219149	-1.01977	0.153277	-1.1446	-1.75254	-0.616133	-0.947325	-0.997547	-1.06098	-1.15267	-1.13293	0.384299	0.27512	0.0933241
253	-1.32246	-1.42292	-1.00641	0.173382	-0.143306	-0.634556	-0.707213	-0.881205	-0.51044	-0.359329	-0.62065	-0.847666	-0.383321	-0.989276	-1.70904	-0.528026	-1.94111	-0.891808	1.29423	-0.267501	0.203005
254	-1.33476	-0.944397	-0.389053	-1.57329	0.647794	-0.656995	-0.178675	-0.364205	-0.268385	-0.636447	-0.457635	-0.892931	-0.539521	-1.60214	-0.520725	-0.210393	-0.966865	-1.22729	0.738087	0.126921	0.982693
255	-1.04181	-2.02137	-0.230797	-0.593246	-0.508163	-0.226684	-0.558317	-1.65388	-1.63664	-0.620468	-1.64897	-0.686867	-1.65151	-1.34738	-1.24195	-0.775412	-2.14917	-2.10937	0.617304	0.720644	0.407584
256	-0.0802426	-1.17607	-0.481436	-0.885393	0.580356	-1.46702	-0.83913	-1.3382	-0.482562	-0.314754	-0.652572	-1.58312	-1.24391	-0.851601	-0.403203	-0.758996	-1.05058	-1.2403	1.15362	0.449799	-0.837056
257	-0.80142	-0.589689	-0.360535	-0.162276	0.00108074	-0.360881	-0.135574	-0.990779	-0.229001	-0.498939	-0.693858	-0.836458	-0.2327	-0.868763	-1.67573	-0.547496	-1.3897	-0.499208	0.256305	-0.0370729	0.548738
258	-0.9546	-1.14414	-0.80317	-1.59442	-0.0892689	-0.999308	0.112151	-0.360291	-0.463091	-1.06874	-0.334628	-0.64074	-0.939318	-0.926731	-1.89917	-1.20261	-0.691335	-1.06208	0.0859457	-0.450542	-0.103148
259	0.253698	-0.656269	-0.785496	-1.54096	-0.512053	-0.39212	-0.919237	-0.536828	-0.812677	-1.21549	-0.748338	-1.59174	-0.268031	-1.01445	-1.13528	-0.237117	-1.1834	-0.899038	0.012484	-0.22987	-0.496091
260	-0.973235	-0.874701	-0.657767	-0.67571	-0.630502	-0.719914	-0.481692	-0.936862	-1.24811	-0.284057	-0.767492	-0.243699	-0.924441	-1.63875	-0.753522	-0.59369	-0.487159	-1.12679	0.432072	0.678368	-0.136052
261	-0.745142	-0.672233	-0.0155043	-0.850169	-0.817686	-0.588796	0.160042	-0.715104	-0.57549	-0.784047	-0.59341	-1.20591	-0.361751	-0.324928	-1.07465	-0.458543	-1.27949	-0.846619	0.515449	0.896253	-0.5619
262	-0.484996	-1.16049	-0.950179	-0.829035	-1.43846	-0.052007	-0.487352	-0.132881	-0.00287634	0.150754	-0.509987	-1.22832	-0.599397	-0.387854	-1.1742	-0.768159	-1.21202	-0.472095	0.0958608	0.43168	0.112876
263	0.224627	-0.472491	-0.812408	-0.892023	0.0391227	-0.578237	0.996385	-1.29298	-0.470614	-0.45899	-1.18886	-1.17961	-0.205551	-1.01635	-0.917827	-0.696386	-1.0958	-0.54512	0.31264	0.0939365	0.537293
264	-0.874097	-0.599812	-0.485854	-0.0789834	-0.588137	-0.880951	-0.342809	-0.632923	-0.0458002	-0.247893	-0.604476	-0.913624	-0.599026	-0.318063	-1.03385	-0.715856	-0.119785	-1.46661	0.866082	-0.0728449	-0.0835959
265	-0.741042	-0.147763	-0.553334	-1.6255	0.295906	-0.676795	-0.103792	-1.50343	-0.259977	-0.374467	-0.68492	-0.771362	0.242965	-0.202889	-0.753148	0.109911	-0.863011	-0.45402	-0.204296	-0.178767	-0.0201717
266	-1.33103	-0.73531	-0.545301	-0.752373	-0.474876	-0.338441	-0.251382	-0.233324	-0.82551	-0.445534	-0.822823	-0.575644	-0.265428	-0.483197	-0.744539	-0.412349	-1.10781	-0.455104	0.464972	0.331333	-0.260993
267	-0.140993	-0.571389	-0.250077	-1.09342	-0.461475	-0.530278	-0.190866	-2.66179	-0.321044	-0.487585	0.291044	-1.2404	-0.877582	-0.377176	-0.263226	-0.480686	-1.83691	-0.302909	0.875997	0.139465	-0.43982
268	-0.461516	-1.09547	-0.494289	-0.092244	-0.289422	0.0465511	0.121294	0.132359	-0.325027	-0.523329	-0.14948	-0.757998	-0.51795	-1.33594	-0.548421	-0.531843	-1.83479	0.530732	0.260812	-0.15461	-0.112685
269	-1.13499	-1.11844	-0.463763	0.00555287	-0.427756	-0.777553	-0.193042	-0.800763	0.0865115	-0.555288	-2.49086	-0.679107	-0.540265	-0.59532	-0.339203	-0.71013	-1.29786	-1.02159	0.985514	0.283017	-0.217597
270	-0.79732	-0.339329	-0.630052	-0.0599213	-0.649091	0.00563189	-0.589663	-0.911207	-0.837015	-0.43376	-0.0188127	-0.394152	-0.842251	-0.577777	-0.093306	-0.382571	-0.211629	0.180068	0.611445	-0.038002	-0.510398
271	-0.694827	0.00175213	-0.852976	-0.700988	0.0603052	-0.0722466	0.0990899	-0.341159	-0.154216	-0.470765	0.141223	-0.818783	-0.25018	-0.393575	-1.3037	-0.13213	-0.605496	-0.846619	0.847604	0.123205	-0.126991
272	-0.663148	-0.191761	-1.69005	-0.271262	0.455423	-0.112286	-0.403761	0.630227	-0.369278	-1.43921	-0.640655	-0.800677	-0.409355	-0.587311	-0.714598	-1.24652	-0.368823	-1.77461	-0.294433	0.7304	0.554937
273	-0.703772	-0.374371	-0.465369	-0.250128	0.443751	-0.548757	-0.0419695	-0.899467	0.247587	-0.069595	-0.14267	-0.599785	-0.52948	-0.869525	-1.47437	-1.56911	-1.33671	-0.601877	0.575841	-0.688403	0.396139
274	-1.17561	-0.180469	-0.544096	-1.17547	0.0737063	0.152149	0.0520701	-0.517696	-0.376358	-0.18818	-0.522756	-0.671348	-0.217452	-0.731851	-0.287179	-0.293237	-1.7387	-1.15463	0.320302	0.610541	-0.0979021
275	-0.28411	-0.473269	-0.458139	0.0855308	0.584679	0.513382	-0.063738	-0.812068	-0.248914	-0.510714	-0.674705	-0.756274	-0.939689	-0.782954	-0.641989	0.109911	0.174467	-0.981824	0.871941	-0.0756324	-0.551409
276	-1.43017	-0.491569	-0.495494	-0.0624076	0.141144	-0.558877	0.147416	-1.33907	-0.561329	-0.25378	-0.502751	-1.05546	-0.246461	-0.527817	-1.11844	-0.553604	-0.630223	-1.17162	0.22025	0.698345	-0.274345
277	-1.00901	-0.377097	-0.719222	-0.953353	-0.107858	-0.0440871	-0.801252	-1.3882	-0.0776612	-0.235277	0.0586515	-0.627807	-0.255386	-0.783336	-0.540187	-0.757469	-0.905754	-1.41527	0.635782	-0.333934	0.268337
278	-1.10517	-0.528559	-0.648127	-0.617695	0.13466	-0.997988	-0.673254	-1.31907	-0.0440302	-0.471606	0.0799329	-0.870083	-0.733283	-1.02131	-0.490783	-0.340958	0.8912	-1.5888	-0.353022	-0.741364	-0.610541
279	-0.400393	-1.65031	-0.691105	0.32878	0.605861	-0.951349	-0.148199	-0.175058	-0.173244	0.2706	0.0284319	-1.19082	-0.738861	0.0305097	-1.33364	-0.488703	-1.41231	-1.11486	0.819661	-0.440786	0.242585
280	-0.830863	-0.663278	-0.614387	-0.500007	-0.182212	-0.254403	0.386869	-0.950341	-1.0419	-1.3652	-0.443589	-0.0906597	-0.930392	-0.339801	-0.909593	-0.664317	0.36416	-1.11052	0.0169908	-0.349265	-0.0521223
281	-0.508104	-0.685472	-0.0408092	0.447711	0.454558	-0.377161	-0.559187	-0.452473	-0.277235	-1.24703	-0.872196	-1.62881	-0.257246	-0.843592	-0.833242	-0.774649	-0.956621	-0.191202	0.0413278	0.633769	-0.219982
282	0.115053	-0.585016	-1.96599	-0.434533	0.0356643	-0.263643	-0.0358744	-0.599007	-0.508227	-0.133934	0.00331989	-0.357509	0.0421367	-0.0240264	-0.48966	-0.830769	-2.05945	-1.60398	0.094058	-0.158326	0.95408
283	-0.658303	-0.352957	-0.365756	0.433207	-0.269968	-0.264963	-0.478209	-0.292894	0.338302	-0.70457	-0.256313	-0.218264	-1.45998	-0.683416	-0.707112	-0.186342	-0.528136	-1.0675	-0.65408	-0.269359	-0.2691
284	-0.453689	-0.0496436	-0.28462	-1.69636	0.0257216	-0.469119	-0.497365	-0.471605	-0.734795	-0.201636	0.0769535	-0.508824	-0.116666	-0.612482	-0.313004	-0.373409	-0.162528	-1.43986	0.202673	0.247245	0.286935
285	-0.269948	0.108048	-0.536062	-1.13652	0.168379	-0.864671	-0.4264	-0.728583	0.227674	-0.0586616	0.0407751	-0.842493	-0.112575	-0.224246	0.339727	-0.0679932	0.537956	-0.24579	0.0909032	-0.466802	-0.850408
286	-0.566245	0.0395202	-0.139619	-0.0379584	-0.479199	-0.0225276	-0.104663	-0.612486	-0.313964	-0.376149	-0.206089	-0.682556	-0.300759	-0.378701	-0.820891	-0.431438	0.688791	-0.262058	0.696174	0.260718	0.596902
287	-0.299018	0.221352	-0.450909	-0.301098	-0.668544	0.310546	-0.136445	-1.05992	0.506015	-0.636447	0.721779	-0.776535	-0.246833	-0.138056	-1.11469	-0.38219	0.362393	-1.34008	0.710596	0.391727	-0.324417
288	-0.450335	0.0204415	-0.34246	0.073099	-1.14796	-0.690434	-0.483869	0.65936	-0.00862902	-0.711719	-0.413369	-0.350611	-0.149394	-0.380608	-0.550667	0.465339	0.615316	-0.561388	1.07385	0.0642039	-0.184216
289	-0.486487	-0.38138	0.249193	-0.979875	0.230629	-0.700994	0.0115808	-0.719887	0.161296	-0.0952463	-0.26823	-0.119112	0.412925	-0.628118	-0.391975	-0.48374	0.925818	-0.786609	0.537983	0.38894	-0.22475
290	-0.504377	-0.0539266	0.307836	-0.111306	0.697076	-0.121086	-0.168662	-0.313331	-0.464419	-0.232754	0.0858916	-1.01881	-1.18849	-1.12962	-0.404326	0.544365	0.556325	-0.163366	-0.310207	-0.209429	0.672725
291	-0.480151	0.0831288	-0.545301	0.177526	0.116936	0.0755905	-0.0994382	-0.454212	-0.0741211	-0.365216	0.597922	-0.321728	-0.102162	-0.578158	-0.370642	-0.658972	-1.22226	-0.200963	0.403679	0.141323	-0.694947
292	-1.12865	-0.139197	-0.883904	0.258747	-0.0814876	-0.318642	-1.25317	-0.531175	-0.266172	0.0645488	-0.123517	-0.719199	-0.233816	-0.551462	-0.23029	0.0301216	-1.15903	-0.0935948	0.494267	0.0470147	-0.041631
293	-0.79732	-0.076899	-0.190229	-0.240182	-0.315359	0.138069	-0.0175889	0.148447	0.185192	-0.264713	-0.47466	-0.702387	-0.515347	-0.703629	-0.632258	-1.11977	0.0172737	-1.00098	0.761974	0.250962	0.261184
294	0.165368	0.444457	-0.477018	-0.0910008	-0.400089	-0.520598	-0.196525	-0.529871	-0.491412	-0.250416	-0.366976	-0.416569	-0.417908	-0.930545	-0.28643	-0.264223	0.664417	-0.0216544	1.68498	0.00938436	-0.0950409
295	-0.361259	-0.463146	-1.21287	0.24673	0.303255	-0.217004	0.164395	0.0393077	0.371491	0.380354	0.119091	-0.213953	-0.442082	-0.41188	-0.13485	0.161832	-0.646473	-1.58265	-0.197535	-0.578764	0.156748
296	0.306621	-0.467429	-0.891134	0.01094	-0.024857	0.151269	0.84923	-0.970778	0.0612882	-0.0935643	-0.459337	-0.527792	-0.659274	-0.733376	-0.60793	-1.0877	-0.756685	-0.193371	-0.0884695	-0.0352146	0.0604198
297	-0.299764	0.252891	-0.329205	0.00762484	0.548366	-0.0326474	-0.303191	-0.566396	-0.200238	-1.19783	0.131008	-0.491149	-0.732539	-0.563285	-0.770739	-0.336759	0.0049101	-0.344482	-0.363388	0.866055	-0.226181
298	-0.730234	-0.0593777	-0.763806	-0.136584	-0.177889	0.0544709	-0.679349	-0.7238	-0.76046	-0.45899	0.0658871	-0.034186	0.183088	-0.120895	-0.356794	-0.732272	-0.27274	-1.14053	0.150394	-0.0612306	0.169147
299	-0.588607	0.0266713	0.00457898	-0.61438	-1.0628	-0.272443	-0.205233	-0.901641	-0.362198	-0.329052	-0.637675	0.0360828	-0.359519	0.0244077	-0.0723468	0.139689	-0.442297	-0.524876	0.547447	0.0507313	-0.15465
300	-0.588607	-1.84265	-0.253692	-0.455667	0.530642	0.245427	-0.910965	0.157144	-0.577702	-0.252098	0.214857	-0.139374	-0.493777	-0.678077	-0.730691	0.235514	-0.966865	-0.567895	1.08557	0.141323	0.264045
301	-0.139502	-0.0375734	0.0829037	0.365246	0.66206	-0.561077	-0.806042	-0.299851	0.022347	0.13099	0.0816354	-0.704973	-0.0445169	-0.123946	-0.505754	0.246203	0.141616	-0.633329	1.34381	0.302529	0.283597
302	-0.379522	0.211618	0.0234572	-0.824477	-0.105264	-0.500798	-0.14341	-0.731627	1.05163	-0.653268	-0.595538	-0.0777268	0.0830461	-0.51752	-0.304395	-0.520772	0.113003	0.640269	-0.171396	0.159441	0.695138
303	0.0584023	0.189814	-0.459746	-0.453181	-0.177889	-0.90515	-0.504331	0.498042	-0.706916	-0.541832	-0.480619	0.165843	0.795242	-0.47862	0.545202	-0.230627	-0.863011	-0.0657586	1.02653	0.0112426	-0.908587
304	-0.44959	0.277031	-0.152874	0.278638	0.133795	0.0676707	-0.00714005	-0.19419	-0.329009	-0.752929	-0.177572	-0.892069	0.150361	-0.081232	-0.632632	0.319121	-0.315483	-0.613807	-0.133538	-0.0965381	-0.0993327
305	-0.162237	0.25912	-0.644914	0.0643967	0.058576	0.12135	-0.94057	0.0688754	-0.00907154	-0.345031	0.263804	-0.571333	-0.188816	-0.362684	-0.1734	0.0274492	0.391006	-0.00466347	-0.4702	0.420066	0.506773
306	0.334947	0.245103	-0.1593	-1.42328	0.794774	0.306586	-0.298837	-0.876422	0.410432	-0.43376	-0.395919	0.859478	0.106476	-0.14759	-0.243763	-0.357375	-0.452541	-0.109501	0.875997	0.148291	0.44621
307	-0.717562	0.0441926	0.0491638	-0.129125	0.236682	0.364225	0.756932	-0.365944	0.0741211	-0.623832	-0.0669087	0.0326341	0.481727	-0.0408067	0.344592	-0.217265	-0.89339	0.0459479	0.408636	-0.188059	0.414737
308	-0.00495693	0.560097	0.216658	-0.415471	0.247057	-0.873471	0.64809	0.169753	-0.037835	-0.0132462	0.212729	0.128338	0.10722	-0.340945	0.425809	0.0205774	0.26843	-0.0390069	0.834985	0.305317	0.052313
309	-0.0534081	-0.130631	0.182918	-0.603191	0.821144	-0.441399	0.336801	-0.0441776	0.0670409	0.354283	0.566851	0.124889	-0.358032	-0.0610193	0.145105	0.212226	-0.546504	0.0202807	0.274783	1.01844	-0.0235099
310	0.0841187	0.349063	-0.35692	0.274494	-0.12904	-0.841791	-0.488222	-0.191147	0.399811	-0.156641	-1.15183	0.615908	0.427057	-0.727655	-0.61579	0.448923	-0.460666	-0.15469	0.120198	0.298348	0.365619
311	-0.180127	0.0216096	0.000562331	0.669825	0.604132	-0.4018	-0.704601	0.10627	-0.19891	0.299195	0.226774	-0.390703	0.32999	-0.594557	-0.357916	-0.358138	0.623441	-0.00900159	0.720511	0.893001	0.0828329
312	-0.487233	-0.16178	-0.365756	-0.300269	-0.324005	-0.572517	-0.580521	0.0640924	0.133418	-0.206682	-0.782389	-0.146271	0.40995	-0.459933	0.52836	-0.106934	-0.223639	-0.799261	-0.0808079	1.01844	-0.23238
313	-0.458907	0.0270606	0.00739064	-1.35987	0.105696	-0.546557	0.00461491	0.173667	0.482562	-0.0292257	0.169315	-0.544174	0.0380458	-0.0663585	0.0870931	-0.127931	0.701155	-0.450766	0.697976	-0.364596	0.622177
314	-0.373931	0.0107075	-0.307515	0.464286	0.167514	-0.252203	-0.30798	-0.190277	0.296263	-0.643175	-0.102236	-0.406223	-0.136377	-0.601803	0.0260868	0.0263039	-1.11593	0.0170271	-0.200239	0.152937	-0.0702434
315	0.138533	-0.731416	-0.20268	-0.244326	-0.276453	0.189548	0.43563	-1.1434	-0.086069	0.595657	0.318284	0.523654	-0.0969553	0.0720791	0.10431	0.246203	-0.099297	-0.289894	-1.08223	0.115307	-0.162757
316	-0.470088	0.410582	0.297795	-0.028013	0.0871074	0.417904	0.266707	0.207148	0.526813	-0.482539	-0.71897	-0.135063	-0.0720378	0.536589	0.558676	0.221006	0.200961	-0.165535	0.0773827	1.08951	-1.11412
317	0.376317	0.479888	0.099372	-0.429975	0.0170757	0.364225	-0.371544	-0.0885292	-0.854716	0.00273334	-0.0409454	0.0847968	0.236271	0.518283	-0.0289312	-0.111515	0.515348	0.0951132	-0.18086	-0.483991	0.33796
318	0.13257	0.126737	0.0756737	0.307646	0.263052	-0.321282	0.106056	0.0775718	0.197583	0.289944	0.137393	0.651689	0.0997818	-1.05411	-0.443625	-0.220701	-0.583242	-0.540782	-0.431441	-0.84961	0.463855
319	-0.0213558	-0.197991	-0.238027	0.23637	-0.0140496	0.175909	-0.572684	0.104531	0.856044	0.144026	0.637079	-0.171275	0.218419	0.226153	-0.121751	0.136635	-0.532021	0.502896	1.09052	0.269545	0.0971391
320	0.221646	0.160612	0.309041	-0.0313281	0.56782	0.274907	0.38861	-0.0733105	0.0772187	-0.159164	0.0246013	-0.480803	0.0127563	-0.476713	-0.547672	-0.0210355	0.384648	0.614602	0.287402	0.18267	0.15341
321	-0.228578	-0.416033	-0.282612	-0.625568	-0.253973	-0.0740065	-0.280116	0.623705	-0.994993	0.264713	-0.326541	-0.194123	-0.486711	-0.0995378	-0.0686041	-0.0538677	-0.238122	-0.522707	0.294162	-0.362738	0.184407
322	-0.144347	0.236148	-0.367765	-0.792154	-0.515512	0.164469	0.194	0.0332202	0.685233	0.100713	-0.0579705	-0.0324616	0.189411	-0.395482	-0.466455	-0.187105	0.607192	-0.0270771	0.0503416	0.0823222	0.0418218
323	-0.041109	-0.319471	0.12789	0.763064	-0.409167	-0.0432071	-0.552657	0.224541	-0.393174	-0.661678	0.434055	-0.219127	-0.131542	0.643373	0.515635	-0.279875	0.125366	0.549169	0.120198	0.545036	0.124798
324	0.0364129	0.250944	0.181312	0.844285	0.534101	-1.14847	0.385998	0.0345247	-0.0139392	-0.0944053	-0.406985	-0.0272884	0.0306077	0.0293656	0.498418	0.270255	-0.380833	-0.215785	-0.225478	-0.588055	-0.126514
325	0.144124	0.676516	0.18332	0.108737	0.0814876	0.331665	-0.623622	0.782849	0.441408	0.346713	0.382554	-0.0402214	0.570984	-0.433619	0.447891	0.658896	-1.3957	-0.19554	0.153098	0.0883616	0.0041488
326	0.249598	0.606042	0.502644	0.363174	0.463204	1.43692	0.684225	1.91164	1.22466	0.334518	2.10337	1.12891	0.340032	-0.00495782	0.51788	2.9079	3.02692	3.86385	1.12342	1.55734	1.57115
327	6.934	6.02791	6.59229	4.66168	3.13176	6.36395	13.976	11.2416	13.9815	5.25747	9.23348	6.35338	3.71766	10.3882	11.4814	12.8889	14.6942	17.6128	4.28228	6.42095	8.08143
328	32.4316	25.5307	29.4406	19.0055	15.5918	16.3007	30.581	29.9027	32.3569	13.7052	22.0291	17.2541	16.7116	37.2267	38.2707	20.1635	20.5606	22.9628	8.77065	12.1305	13.6113
329	48.8297	40.5705	45.8125	23.8891	20.239	17.1961	37.0279	35.8267	36.1434	20.1983	29.5627	21.034	31.8265	54.0452	50.9548	21.4692	20.8608	24.9728	10.5382	14.2713	14.6766
330	54.2235	46.6691	48.1245	27.5776	24.7694	21.4033	40.9384	41.8981	41.9156	27.5447	36.7069	25.5851	43.2034	60.6517	57.378	27.0037	26.2411	29.3163	14.817	17.4248	17.0409
331	61.2373	56.2568	52.6552	36.2099	30.911	26.9305	48.1877	49.3448	47.7409	35.2262	45.648	31.6907	56.0747	70.5364	65.8486	32.8558	34.7433	35.3365	16.8478	19.7825	20.3318
332	68.5132	61.5587	60.4717	43.0146	35.2089	31.3946	53.9329	54.5152	52.1886	42.2736	52.8437	38.7089	64.6195	75.9202	70.7145	37.0473	39.6396	40.8105	19.4163	20.4784	22.2589
333	72.7497	64.5358	63.0174	47.8742	39.8457	36.495	55.5712	56.1288	53.4904	47.9446	57.9087	42.8651	69.5153	76.818	71.6359	40.9146	42.7496	44.0847	20.191	21.2533	22.8049
334	73.3718	65.3881	64.1501	51.2714	42.6353	37.8541	54.8502	56.8632	55.7167	53.6464	59.7078	46.0777	72.2618	76.5682	71.2673	43.3144	46.3025	46.0885	22.1844	21.6794	23.113
335	71.1955	65.9009	64.7084	52.4367	45.4919	39.9621	54.2158	57.3815	53.7228	57.5879	62.0756	48.672	73.2551	74.5172	71.4084	44.6945	49.5856	47.1933	22.3764	21.8633	23.1192
336	69.332	64.6903	63.4709	53.5153	45.8719	41.5562	53.7461	55.8418	54.2803	59.3368	62.2173	50.6822	72.801	73.0333	70.2032	44.0879	50.7004	47.7124	23.8308	20.8891	23.009
337	68.3619	64.0234	60.8243	52.2179	46.9068	40.6872	53.1009	53.8782	53.0431	59.2396	64.285	48.7466	73.2637	72.039	68.9445	44.3043	50.7679	47.9315	22.6738	21.3026	22.3519
338	68.0962	61.6907	60.9131	51.0891	47.5315	41.2438	51.4221	54.1543	50.1304	59.661	61.0081	48.4983	72.2491	69.9568	66.8984	42.46	53.2816	48.3078	22.3512	21.0643	21.091
339	66.0497	63.4673	57.1314	51.8424	45.4513	40.3379	50.5836	53.5356	50.4459	57.4297	61.5763	48.8833	69.6328	69.1845	67.6593	42.3993	52.6058	47.2031	21.6102	19.1646	20.7033
340	64.8496	60.3225	53.4204	48.0205	44.1518	39.8455	48.5047	51.7719	48.9148	55.3272	61.5682	48.3845	69.3074	67.1762	63.8241	42.1137	52.0318	47.4839	21.8414	19.9172	20.5607
341	62.8258	58.1401	50.0677	47.8962	43.078	37.8546	49.0846	50.3888	46.5332	52.4622	59.9393	46.8597	67.7041	66.2796	63.3118	41.7518	51.9912	44.6801	20.2447	19.3277	18.5192
342	57.5387	55.9102	49.5528	47.7627	40.7661	37.2544	46.6287	48.2438	44.8623	52.6506	58.9774	45.7621	67.0049	65.206	61.7574	42.7807	51.1438	45.5361	19.8832	18.7038	18.3576
343	57.2778	53.5005	47.5549	44.6689	42.101	35.8086	44.8119	47.4624	42.9033	53.4799	55.3983	43.3294	65.4942	63.3579	60.5837	41.5563	50.87	44.4151	20.2136	17.1869	17.2546
344	54.9141	51.2714	45.5345	42.9823	38.7589	35.5587	45.1014	47.0198	43.0312	51.2167	54.3296	44.7615	64.5466	61.2001	59.3639	39.1138	48.3669	44.1201	19.8007	17.0917	17.4458
345	52.8068	49.8436	43.1	41.9571	38.8696	34.2933	42.7783	45.961	42.1032	48.4421	52.0065	42.303	62.9132	59.4507	58.8804	39.4448	47.1479	44.6103	19.1909	17.7574	17.6709
346	48.8946	47.6001	43.6628	40.3695	37.3112	32.5659	41.8357	42.9981	42.1382	47.8992	51.3523	41.3102	61.2921	59.0148	55.8933	37.7199	47.4315	41.6528	18.6722	17.2362	17.1244
347	48.8398	46.4526	43.1265	39.8905	36.0126	32.3666	40.4177	42.4651	41.3731	47.3875	51.1259	41.2878	57.5247	58.2449	56.3993	37.6276	47.6519	41.2645	17.5766	13.8086	16.3213
348	46.7232	45.5711	39.7706	36.9421	35.77	30.3474	39.4708	40.5349	40.0615	46.8883	49.8107	41.1015	58.2838	56.7068	55.8173	36.6853	46.7681	41.1174	18.6488	14.8051	16.0471
349	48.2819	44.3843	37.6478	37.0233	35.0676	31.0237	39.4669	40.5419	38.2587	45.4182	47.8055	39.9199	56.5652	55.4467	53.6585	37.116	47.1662	40.9522	18.0232	15.4453	15.2684
350	45.5597	43.5273	37.651	37.4609	32.9156	29.7592	37.2561	40.2392	38.0817	44.7555	46.5827	39.1383	55.6983	54.9967	51.6247	35.9401	48.0197	40.5104	16.467	14.8766	14.565
351	45.1817	41.7885	35.9641	34.3799	32.859	29.0631	35.6744	38.6778	37.2533	44.4153	46.1745	38.0877	52.4393	53.2924	50.3574	34.8681	46.7229	39.6005	16.4165	14.4004	14.7968
352	43.5978	38.857	36.238	32.6171	32.712	29.4226	36.4785	38.3138	36.9754	44.057	46.1903	37.2626	53.4211	52.5823	49.9435	34.6448	45.1305	38.704	15.622	14.0553	14.5183
353	42.1796	36.2864	34.41	32.0614	32.3246	29.0266	35.2029	37.7908	35.2111	43.9018	44.7244	37.1281	52.7818	51.9683	48.8824	34.7494	44.1912	37.4445	13.8089	14.5663	14.8096
354	39.7537	35.1923	34.2811	31.7083	30.793	28.1101	34.0496	37.1237	33.7906	41.3253	42.0208	34.8118	51.6226	52.3698	47.3951	32.9547	43.3109	37.4477	15.498	13.9071	13.5521
355	37.6379	35.216	34.0778	32.7882	30.0802	25.5577	32.669	36.7263	33.9534	40.269	40.4107	34.8041	50.6133	49.8936	47.1114	32.5351	43.7277	38.0464	14.1261	13.0281	11.9842
356	37.9994	34.7379	32.3113	29.8796	29.5281	24.6909	31.6207	35.7058	31.7272	40.4809	41.0628	33.9445	50.7248	50.0069	45.7659	32.563	38.8311	37.0002	15.6287	12.7071	12.0724
357	36.0062	33.4472	31.8345	30.5716	29.0284	23.623	30.9615	35.6541	31.6851	39.1063	39.3692	33.6591	49.3123	48.4669	46.0855	32.1205	42.1922	33.1505	14.8274	13.1349	12.1654
358	32.4588	32.7023	31.743	29.8253	27.3195	23.0405	29.7586	35.1444	31.9865	37.666	39.8169	33.0379	47.9043	46.8842	44.9451	29.8937	40.5772	32.4303	14.5286	12.5198	12.1749
359	31.3635	32.5232	29.7186	28.0132	28.102	23.506	28.8278	32.7129	29.9779	36.5445	38.9972	33.3508	46.4624	46.5219	42.5389	29.8807	38.9271	30.5404	14.0698	11.1675	12.0481
360	30.1291	31.9602	28.6349	27.4177	25.6063	23.1465	28.6636	33.2465	29.3885	36.2851	36.3838	32.0817	44.34	46.0448	41.7522	28.7067	37.1139	30.0682	13.57	12.0715	13.1458
361	30.7996	30.3042	27.3515	28.2788	25.1023	23.0088	28.7751	32.8712	28.7278	35.2178	37.4585	32.5964	44.9904	44.8465	40.0848	27.3999	34.7779	29.2715	12.9715	11.1438	11.8206
362	30.0791	31.3648	26.0602	27.3563	24.8676	21.805	28.1952	32.0459	27.9317	35.3225	34.606	31.2587	42.3373	43.8206	40.3898	26.5738	35.8009	28.645	12.679	11.4012	12.2894
363	27.7811	29.8553	26.7294	26.2756	24.5559	22.7065	28.8665	32.0103	28.4711	33.9504	34.766	30.1749	41.6139	42.3222	38.8916	26.7368	33.6896	27.3157	12.1039	11.1656	11.2088
364	26.5873	30.1376	26.2289	25.3399	25.4814	20.9545	26.2208	29.5214	27.7605	35.3175	35.8173	31.1475	42.3562	41.6709	38.9287	24.6955	33.461	27.0099	12.8043	9.63625	11.7429
365	26.3707	30.6722	25.6356	26.5868	24.6773	21.4099	26.6026	27.9273	27.1047	34.8877	34.8205	30.3077	40.5042	42.6933	38.0907	24.5615	31.313	27.4476	11.729	10.0966	10.3246
366	27.0207	30.5067	23.941	27.2221	24.9164	19.9403	26.6052	28.5174	25.4337	32.2877	33.0171	28.6678	39.2561	40.148	36.8095	25.0776	32.1809	26.4886	12.3586	10.1268	10.3246
367	27.3006	30.9837	23.0393	27.6974	24.6285	18.6617	26.1132	27.4681	24.0128	33.8907	32.4204	28.7571	37.8603	40.4974	36.0501	24.7508	32.3625	27.6559	11.8592	9.45692	10.1739
368	27.5381	29.9036	24.7749	25.9557	24.1288	20.1291	26.4202	27.1399	24	33.3087	32.9094	28.0298	38.0991	40.0268	36.3136	24.2064	30.6944	26.7709	12.0936	9.12615	9.31462
369	28.3818	27.2361	25.3143	25.7058	23.6135	19.9232	25.0927	27.2168	22.9897	32.8087	32.2404	27.0258	37.8796	38.5551	35.6699	23.9495	30.7414	24.0997	11.7177	9.55727	10.4758
370	28.5984	26.8969	25.2589	26.6266	23.2936	18.7968	23.9904	25.9537	23.003	33.2309	31.195	25.3475	37.8265	38.2286	35.2039	23.5563	28.6096	24.3336	11.5329	9.63346	9.27266
371	27.4538	25.6724	24.2178	24.9168	21.6362	19.2865	23.7488	24.5809	23.2902	32.4399	30.746	26.1463	37.3846	37.4777	34.2084	25.3712	26.1694	24.3206	10.2516	8.1761	9.13627
372	27.481	25.8861	23.314	25.2736	21.2596	19.0881	25.2281	24.1931	23.0468	31.2473	30.7098	25.0061	36.8896	37.1772	33.3838	23.7029	28.0193	24.9352	10.8997	10.0005	9.64891
373	26.7334	25.781	22.7147	25.4713	20.0751	18.2235	23.6887	24.6118	21.2201	30.6607	31.5683	25.4587	36.9945	37.2431	32.6184	24.0045	24.4215	24.8408	10.3683	9.29897	8.80485
374	25.3268	26.2249	22.3825	23.3048	21.1126	17.8715	23.0857	23.9409	20.5833	29.3331	30.9311	24.7793	35.8498	36.3717	34.9636	23.567	25.8409	22.8424	9.93793	7.79329	8.6985
375	25.4755	26.1205	22.5633	26.051	20.0336	18.4065	24.1079	24.2096	20.0156	28.9887	29.4453	24.5681	35.8048	36.3946	31.9096	24.1049	25.0588	20.6466	9.57783	7.15915	8.42955
376	24.4402	26.2031	21.4153	24.8435	20.0885	17.6744	23.7984	23.7096	20.2209	28.6368	28.8345	24.3349	34.5399	34.6555	32.0967	22.9344	27.2192	20.2659	9.21052	7.67761	7.93408
377	24.2557	24.5849	19.3307	23.4482	19.153	17.4922	24.5263	23.3765	18.7531	29.0375	29.7713	24.8324	33.5265	34.6681	32.1435	22.3598	23.844	22.1107	9.12129	7.76263	9.51729
378	23.8781	26.2599	20.6457	22.1371	18.4782	17.0883	23.7427	21.3002	18.985	27.6519	28.4599	23.6848	34.3313	34.1243	31.7146	21.6887	22.384	22.0326	8.64221	7.51362	8.87256
379	24.1986	25.1849	21.6451	21.7372	18.4994	17.1921	23.9133	23.3813	19.0664	29.1948	27.8653	23.6404	35.3049	32.6019	31.4189	21.2752	22.7881	20.8718	8.9676	5.78262	9.16632
380	23.1525	24.4108	21.1583	21.7707	17.6283	16.9264	22.3969	23.1865	20.8484	29.8239	26.8702	21.6832	34.1037	33.0835	31.3324	20.9729	24.0255	20.0953	9.68284	6.72431	8.30222
381	22.1976	25.2262	19.2463	22.4715	16.6639	16.1806	22.1832	24.3996	19.3549	30.5997	27.0886	20.9055	33.7649	33.0523	31.2213	21.0923	22.727	21.0294	8.38577	6.87112	9.10575
382	23.4111	24.5837	18.782	21.4015	17.3724	14.5293	21.3882	24.03	19.4177	31.228	27.0502	19.0768	34.2737	32.7479	29.5509	20.6693	20.9361	19.2703	9.07667	7.0156	7.45005
383	21.9695	23.6321	18.4282	20.5508	16.4892	16.5612	19.9079	23.076	18.4066	30.0291	27.5836	18.6681	32.4193	31.5859	28.0029	20.2815	23.3007	19.8946	9.22044	6.4228	6.7438
384	22.0586	24.6783	17.4324	20.6005	15.9631	14.9125	19.4425	23.5078	17.772	29.2616	28.4237	19.8989	31.1645	31.5138	25.118	19.3267	21.8202	20.1057	9.28038	6.71455	7.62506
385	22.4507	23.1228	17.4597	19.262	17.0482	15.4427	19.6454	21.7198	17.3813	27.609	27.3239	19.6626	30.0514	31.0478	25.5376	20.4227	20.5931	20.3494	9.06495	5.13036	6.96793
386	20.9286	25.0844	17.0364	19.1385	15.8265	15.9342	19.9367	22.1277	16.0909	27.5262	24.5731	19.3122	30.0816	31.595	28.415	18.8666	21.0668	18.2049	10.4035	6.3638	7.05901
387	21.0161	23.1411	16.997	19.6362	16.8818	16.9849	18.6858	21.2024	15.7042	26.432	24.3475	19.5303	30.1518	31.0013	28.3697	18.3696	20.9505	18.3347	9.57558	5.60934	7.36612
388	20.2044	20.4651	16.5054	18.9031	16.6215	16.8366	19.4007	20.2301	15.0846	24.652	24.6765	20.727	29.1213	31.3418	29.1385	18.8895	18.1921	16.9906	9.2601	5.05092	6.21876
389	18.5306	22.1891	15.4767	19.5653	15.9286	15.5325	20.6925	21.2868	16.0307	24.6112	22.754	19.4406	27.8022	29.7694	29.7661	18.1592	21.4875	17.4273	8.72198	5.45231	6.16058
390	20.3725	20.7037	15.249	19.1277	15.4634	16.2488	18.4429	20.4976	15.9228	25.1864	23.1945	20.9749	27.4466	30.2831	29.7205	17.853	21.6856	17.3427	8.81031	4.76103	6.49344
391	20.1116	21.044	15.4948	19.8873	15.3951	17.5287	17.9048	19.7731	15.9206	25.6229	21.8321	18.6526	26.1773	28.7107	28.5647	18.0962	20.6259	16.7817	8.36864	4.80052	5.96077
392	19.9059	19.9787	14.7626	20.0609	14.4013	18.6652	16.846	19.0887	15.7643	24.6129	21.6337	18.8949	25.8311	29.5032	29.0864	18.0218	21.0424	18.2136	9.27677	5.43652	5.98176
393	19.6878	19.7623	14.5549	19.1041	14.8504	18.6635	18.5875	18.0682	15.9568	24.6402	20.3117	18.9074	28.1841	28.9697	28.8514	17.4411	19.9275	18.7895	8.48402	5.70969	6.3108
394	19.2074	20.2416	14.9803	19.2541	15.5334	18.5323	17.4259	17.6864	14.4319	25.2844	21.7163	18.1353	26.5704	28.8766	28.9835	17.3434	19.9233	17.9938	8.31411	5.6256	6.00512
395	19.8466	19.9748	14.3456	18.4755	15.3579	16.4072	17.2766	19.0961	15.7865	24.3294	21.1923	17.9102	26.2112	27.6883	28.4869	17.6595	18.6555	18.0571	6.84442	4.55011	5.19158
396	20.1116	19.2401	15.1072	18.8874	14.1985	15.6592	15.7724	18.4561	16.5153	23.4766	21.0685	17.5451	26.801	27.4846	28.1137	18.4539	18.439	15.9339	7.87694	5.25626	6.76621
397	19.8615	17.0803	15.3402	19.3287	14.6689	16.6782	14.5899	19.2518	15.6311	24.2752	20.2262	17.5835	26.0431	25.9336	28.2892	18.0955	17.7795	15.8342	7.19911	5.45324	5.89783
398	19.2794	18.2254	16.0495	19.5131	16.695	16.7636	14.6983	20.0658	17.3985	23.181	20.5854	18.4603	25.6035	25.6167	28.8274	17.3987	18.143	16.6559	7.42355	4.39866	6.32224
399	18.3431	16.5566	15.1164	20.8006	15.8719	16.7337	16.4507	20.2175	17.1171	22.8753	20.1687	17.924	24.3472	25.1457	29.4704	17.0109	15.5067	14.8924	8.07299	4.08833	6.62935
400	17.54	17.5849	14.485	18.5733	15.5097	15.5422	16.5917	19.01	16.3401	23.0338	21.509	16.3833	23.5063	24.2437	28.6545	17.4789	16.1256	15.1209	8.1744	4.48136	6.09621
401	18.8325	16.675	14.0114	18.3309	15.2218	14.579	16.5486	18.5426	14.9134	21.7706	21.8461	15.9086	24.9158	24.8528	27.8469	15.969	15.7805	13.5342	7.43798	4.83629	6.37565
402	18.5291	16.0645	14.6176	19.4953	15.4634	13.2379	14.3783	17.7986	14.5563	21.8375	20.2432	16.7454	24.8024	26.7471	26.59	16.8097	17.469	13.471	8.67916	3.7334	5.98748
403	17.5947	16.8989	14.9991	19.9209	15.1677	12.5383	14.8646	17.5777	15.274	22.5027	21.2366	17.5783	24.4762	26.0983	26.1484	16.5741	17.2771	14.2403	9.01042	4.21934	6.24785
404	18.115	16.7747	14.8079	20.2541	14.9451	14.3735	15.3218	16.6859	13.7713	22.3215	21.2434	15.4366	22.7402	26.6094	25.3621	15.5475	17.1281	12.407	9.19024	3.61772	5.60073
405	17.6518	16.7104	14.6103	19.3809	13.6067	12.8428	14.9443	17.0547	13.7912	20.5776	21.7073	15.315	23.7882	26.723	26.3034	16.5661	20.0031	12.7009	8.95138	4.16359	5.56592
406	17.5743	15.8036	16.844	19.1974	15.7911	11.778	13.9543	17.2812	14.1045	20.2198	21.3392	16.338	23.9232	26.2627	26.1978	16.4138	18.298	12.2997	8.09462	3.47602	5.1272
407	18.7129	16.3008	17.1766	17.7366	14.2634	12.4833	13.8855	17.9043	14.5182	19.6765	22.2104	16.1466	21.5836	27.1723	26.0197	16.6062	17.606	11.979	8.68998	3.49553	5.20684
408	17.1456	15.0907	17.7911	17.6653	13.9426	12.8217	12.9642	16.6046	14.2178	18.9801	22.8433	17.4175	22.6732	26.2032	25.7726	15.6212	17.1546	12.894	7.63988	2.59055	4.84537
409	17.6246	15.0303	17.7076	17.6077	14.8275	12.5287	11.9115	15.7867	14.0323	17.6958	22.9502	16.3328	20.704	25.2616	25.9834	15.4357	17.8692	13.5075	7.20768	3.83003	6.40903
410	15.4718	16.0824	17.8285	18.1456	15.0207	12.123	10.0647	18.1674	13.9531	17.6281	24.0057	16.1216	20.8163	25.6533	26.306	16.1442	16.0175	14.1437	7.6187	4.22724	5.37565
411	14.9091	15.8262	17.5638	18.071	13.9327	12.9841	10.238	18.1491	14.3797	16.8292	22.94	15.6965	21.1168	25.2006	25.861	17.6679	17.5159	13.6105	7.02425	3.73758	5.78385
412	15.0913	16.2518	17.912	18.4999	13.1035	11.7389	8.96886	17.2055	13.2544	16.4095	22.1811	14.705	21.559	23.5027	25.7704	16.7856	17.2425	13.6922	5.94711	4.30435	6.27599
413	13.7444	15.732	16.5849	19.2243	13.0983	12.2612	8.93751	16.0228	13.6938	16.0113	21.8363	13.56	21.9283	22.8933	25.084	16.2118	18.7329	14.9148	5.71591	4.96451	5.70708
414	14.842	14.6355	17.61	19.3784	12.1222	11.4828	10.3394	15.0467	14.5479	16.7169	21.3873	12.6422	22.1236	21.7549	24.8987	16.0011	18.4065	14.8848	5.779	4.4795	4.87636
415	14.9616	14.8711	19.3142	18.8832	13.4351	11.4331	10.0164	16.6938	13.4398	15.452	21.3251	12.0611	23.2225	24.0637	25.0885	15.0894	20.1215	12.8061	6.04401	3.90296	4.95076
416	15.9694	17.5483	18.7676	19.5943	14.831	11.4463	9.90577	15.0458	13.0141	15.7854	21.32	11.1605	23.0213	23.9085	24.8216	14.2892	20.397	12.8821	6.19859	5.01469	4.89258
417	15.3828	16.8117	17.8108	19.223	13.0365	11.9686	9.44558	16.2694	12.5698	14.9743	19.9384	11.9029	23.6625	23.5782	24.0255	15.249	17.5078	13.3444	6.79214	5.44813	4.54875
418	14.7529	16.8814	17.1681	18.8397	13.3914	10.9209	8.22829	16.6764	12.6707	14.6337	21.6358	13.5324	23.5803	24.5641	24.536	15.6781	19.7661	13.2309	6.84532	5.50109	5.63745
419	16.2008	16.2121	16.6737	16.9244	13.2319	11.0842	9.59622	16.4863	12.1941	15.2342	20.5211	11.9382	22.7803	24.5675	23.7486	15.2375	19.2087	12.2151	6.90391	4.63838	5.70326
420	15.6194	15.343	16.4319	17.2443	12.3409	10.6402	9.31889	15.1062	12.0521	15.3948	19.8256	11.3597	22.7052	25.5698	22.4768	15.9843	19.2822	12.3459	6.65333	4.06138	5.01656
421	14.8107	14.6663	17.8393	16.36	12.4019	10.4875	9.51829	16.4233	12.2251	16.0058	20.0972	12.074	23.9377	25.3913	22.7212	15.1688	19.5641	13.5718	7.57498	3.69995	4.51919
422	14.0343	14.6515	16.7608	15.9614	11.83	10.0801	9.19394	14.507	11.4082	15.3178	18.8548	12.4189	23.2036	24.1206	23.6378	15.2154	19.8417	12.8412	6.80747	3.30459	5.2097
423	14.7529	14.9112	16.4222	15.329	11.8909	10.7964	9.32891	15.3097	12.1233	14.198	18.765	12.0167	23.4788	25.0961	23.8945	14.7359	19.4846	12.8177	6.58303	3.6284	5.13721
424	13.7779	14.4681	16.2114	15.1359	12.6863	11.3908	9.36461	16.1889	10.9781	13.3469	19.9193	11.9451	22.7037	24.5233	23.5689	14.9214	19.8011	12.5979	6.81423	4.01864	5.11671
425	14.9802	13.8646	15.4558	14.4849	13.0222	11.0829	8.76772	13.5713	11.4653	12.9289	20.007	11.0545	21.9067	24.5099	23.353	14.495	16.7625	12.9164	6.74843	4.19332	5.04088
426	13.416	12.466	14.9758	15.1993	11.6341	9.30089	10.0316	15.0045	10.5577	13.2287	19.4073	11.0963	21.3344	22.9818	23.1902	14.4041	17.1157	12.6977	6.64522	3.71992	4.29505
427	14.0999	13.6064	15.1827	14.668	10.7242	10.3102	10.544	14.2344	11.2131	12.3515	19.7733	10.5902	20.0115	24.2655	22.4948	14.0147	18.298	12.0549	6.74843	3.93874	5.15581
428	14.2684	13.2595	15.059	14.3502	11.3985	9.60008	9.52439	14.9871	10.5427	13.455	20.5803	10.8502	21.4251	24.6308	24.0345	14.1048	18.6636	11.7632	5.08269	4.18868	4.98557
429	13.8387	13.661	14.8055	14.4994	11.1928	10.5421	9.47127	14.9775	11.052	12.772	18.602	10.2009	20.3983	24.8844	22.5071	13.8032	17.6262	11.0608	3.6743	4.43258	3.4734
430	13.6296	14.9116	14.3838	13.9648	12.0098	9.33917	9.32847	15.8767	11.6618	12.8902	17.0769	9.71852	20.8048	25.8138	22.7893	13.3413	17.0567	10.9017	4.60677	4.26765	4.7066
431	16.3719	15.461	15.2671	13.9694	10.7129	10.3362	8.06851	15.9259	11.1002	10.7258	17.3523	10.1156	20.5954	23.6831	22.4244	14.2022	19.0476	10.6252	5.18139	4.48043	5.08523
432	15.5076	14.4167	15.0016	14.9979	11.0804	8.4891	9.62583	15.3836	11.7857	11.3633	16.1108	10.3294	21.1265	23.8376	22.4001	13.5123	18.2899	9.973	5.07368	2.78799	5.16106
433	14.8476	13.8241	14.769	14.4969	10.2521	10.4466	9.86833	14.3862	10.2931	12.5227	15.5783	10.8588	19.0565	23.4017	22.8118	14.2949	18.6248	8.2833	4.5288	3.25535	4.45671
434	14.6895	13.6617	13.6572	14.4169	9.55912	9.7994	10.4086	13.4352	10.9741	13.2388	15.2255	10.2164	19.2982	23.6663	20.9468	13.6688	16.7851	8.4026	5.05836	3.33433	5.36564
435	14.975	12.3905	12.512	13.0038	11.3583	9.88872	10.3359	13.8766	10.7878	13.0605	14.4776	9.89484	20.154	23.1378	20.851	13.489	17.9123	8.66217	4.55404	3.60935	4.50679
436	14.9303	13.4659	11.9356	14.7136	11.348	8.5617	9.51176	14.0157	10.7679	12.8427	14.9497	10.8665	19.7954	22.8174	21.9023	12.2082	16.7727	9.26155	4.50356	3.44257	4.08714
437	15.1606	13.7782	12.1606	14.7215	9.8881	9.87816	10.3512	13.5722	10.8679	14.4533	14.4487	11.7559	19.0747	21.4536	21.6268	12.9973	18.9759	8.60179	5.29542	3.97637	3.79338
438	14.3496	13.9534	12.2277	14.5827	11.2477	9.07561	10.5388	12.8669	10.2382	15.3271	13.5391	11.2282	18.6388	21.0471	21.3888	13.3371	20.001	8.80352	4.15473	3.90018	4.41666
439	14.3724	14.9517	11.4432	13.5993	10.4185	8.07287	10.7308	13.7026	10.4555	15.018	13.9533	10.6243	18.0025	21.6634	20.8098	13.7895	16.7279	10.2947	5.03087	4.27741	4.77622
440	14.5133	14.4334	10.8475	13.8082	11.2602	8.08827	10.056	13.7548	10.2842	14.1921	14.3568	10.8928	18.3201	20.5483	21.0168	14.7664	16.4746	9.94914	4.43371	4.99053	4.35323
441	13.6277	13.3997	13.1571	14.5959	11.4115	8.67302	9.51437	13.6826	8.86157	13.7363	14.2031	10.8286	18.5734	20.1501	21.3222	13.2222	16.399	10.6938	4.58604	4.23188	4.34036
442	13.9184	12.4014	11.6609	13.6971	11.0389	8.33863	9.59013	13.6578	8.70536	12.8385	14.2069	10.3445	18.0624	20.0262	19.9381	11.7993	14.1919	9.75609	3.99384	5.27299	4.36182
443	13.9412	13.3748	11.8055	12.4137	11.3177	8.45831	10.4687	14.2622	9.74128	12.1884	14.7083	10.3496	18.4867	20.1314	20.5122	12.0352	15.6314	10.5973	5.29226	5.04628	4.96029
444	14.2781	12.7023	12.8779	13.666	10.406	9.33345	9.81347	13.4887	11.3604	11.3848	15.1952	9.86811	18.4019	20.1726	20.8704	12.8102	14.051	9.95998	4.89972	4.73501	4.70421
445	13.7496	12.7117	11.7754	14.1028	11.7483	9.29341	9.34197	14.6475	10.8259	12.0938	13.4302	10.0151	17.2888	19.5388	20.0863	12.5697	14.4145	10.4448	3.74686	5.04256	4.57975
446	13.8648	12.6599	12.1999	13.6151	13.4666	10.1677	10.0712	14.3336	10.5192	11.5156	14.8871	10.426	17.1445	19.6021	19.7521	11.5813	10.9982	8.6759	3.99068	4.81306	3.65748
447	13.0675	13.5068	12.998	12.0072	13.2959	9.41309	9.30104	14.6888	10.6644	11.3991	14.5674	10.7989	16.728	21.0875	19.8187	12.1448	10.3165	9.22937	4.38413	5.92803	4.46101
448	13.0034	12.1966	13.3455	12.8973	12.5446	8.60218	8.58094	15.8885	10.9321	11.1632	14.1618	12.2154	18.2974	20.8133	20.5935	11.027	10.6351	10.4256	4.27326	4.4428	4.29839
449	13.3918	11.8816	12.9675	12.5861	13.5847	9.09189	8.07548	13.5261	10.7675	10.4268	14.0312	12.1219	18.1048	21.7805	20.7117	9.99049	10.4797	11.0991	4.53196	3.97358	5.523
450	10.7937	13.1116	12.7892	12.0661	11.9882	8.45567	8.94447	13.4235	9.82536	9.55049	13.8469	12.6952	17.969	21.4571	20.2559	10.4513	11.9008	11.2376	3.63329	3.14478	4.57975
451	11.043	13.4184	12.3899	11.4362	12.8441	7.29937	7.96707	12.9513	10.5263	8.42057	13.4787	11.9098	17.991	20.8431	20.4688	10.1489	11.7969	11.2954	3.94607	4.7889	4.8611
452	10.2876	12.29	12.3618	11.2485	12.5666	8.23875	7.75853	12.5212	9.7997	8.16574	13.7311	10.5096	17.7872	20.2249	21.5321	9.91986	11.4903	8.76483	4.5617	3.76545	4.98986
453	10.5675	11.7889	11.4215	12.5161	11.5641	8.49086	8.22176	13.0078	10.2869	9.31837	12.6445	10.9859	16.8567	19.2833	21.0411	10.7491	11.1759	8.99656	4.77848	3.01145	4.81914
454	11.5924	12.1662	10.9359	12.0308	12.1745	9.17901	7.46422	11.9934	9.5041	9.20609	13.9201	10.3729	17.0742	19.6322	21.202	10.2822	11.6517	9.02042	4.60947	2.65326	4.89878
455	10.358	9.98304	11.9409	11.0454	11.9367	7.77852	8.11771	13.4409	7.6358	9.03957	14.0976	11.4804	17.6696	20.3271	21.4475	10.5685	11.6129	8.55046	4.40171	3.05698	4.47388
456	11.2879	10.323	11.3098	12.1406	11.6419	8.11907	6.60089	12.3934	8.05531	9.4256	14.378	10.3367	19.1163	20.2653	21.305	10.1806	10.7902	7.3394	3.79373	2.58451	5.59787
457	12.5558	10.3292	10.6636	11.8497	10.9766	8.44951	7.82688	13.6905	8.50711	9.76243	15.6558	9.99658	17.7674	19.2672	21.3263	10.4322	10.6736	7.97024	3.85953	2.59241	4.64317
458	11.8417	10.2692	10.6688	12.2861	11.1859	8.48515	9.36896	11.8629	8.47879	8.67498	14.7305	11.0911	18.779	19.5918	20.3184	11.5783	10.3921	8.08592	4.35709	2.17336	4.7209
459	10.5898	10.571	11.3235	11.5953	12.3081	10.1677	9.06464	10.4076	8.25355	9.83518	14.1124	10.0992	17.339	19.4575	20.2267	11.6508	9.18715	8.68458	3.87441	3.72085	3.87779
460	11.3293	10.453	11.6079	11.3773	11.9778	9.17461	9.08641	11.7725	7.76015	9.05891	13.1152	9.61334	17.059	18.8897	20.3277	11.5466	11.3617	8.16979	3.66168	3.14199	4.5807
461	8.31076	11.0382	12.212	11.5841	11.7245	10.0964	8.2875	9.80491	9.59924	9.05471	15.1629	9.16155	16.6759	19.3126	20.2237	11.5939	9.76717	9.15779	3.25562	3.61586	4.17011
462	8.4289	11.2029	12.7803	11.6297	10.5115	9.9204	8.27662	10.8067	9.28815	8.6384	13.5502	9.43616	15.8778	20.051	19.3958	10.4173	11.6436	9.00849	3.90821	3.08485	3.8735
463	8.80682	10.103	12.661	11.234	10.9641	9.86936	8.74333	11.0746	9.12353	8.39955	14.7534	9.24044	17.0936	18.8077	18.6124	11.5	11.9926	8.94306	3.53639	3.0974	4.60407
464	9.86492	8.92826	11.597	12.3516	11.8633	10.059	7.93094	10.7502	9.29169	8.8537	14.8096	10.4199	16.6807	18.9789	17.9477	11.2332	12.5115	9.97734	2.79817	3.43886	3.28313
465	9.67261	8.28737	11.8886	11.6852	12.1239	11.1365	8.41376	10.7328	9.76164	8.27129	15.188	11.23	16.166	18.0594	18.9759	12.0906	11.1904	9.80237	2.93383	3.1852	3.96983
466	9.0133	7.97471	11.7983	10.0243	11.7569	10.3727	7.79641	10.0871	10.1329	8.6918	15.3621	9.97934	16.5286	18.6101	18.7217	12.4124	12.84	9.8237	2.31323	2.63886	3.56353
467	9.06883	7.79833	10.9865	11.9397	10.9766	11.2567	8.43379	9.54185	10.9989	7.93278	15.995	9.37796	16.8369	18.5247	17.6199	11.4901	11.7231	9.08585	1.31767	1.59497	2.74283
468	9.93126	8.1877	11.1721	12.2973	10.2201	12.6409	8.17257	9.7223	9.95679	8.69517	14.9577	9.57152	17.8474	18.6635	17.694	10.4918	11.2413	8.91631	1.93556	2.10368	3.26549
469	10.9696	6.70501	10.2912	12.6305	9.6231	12.5005	6.51294	10.5258	9.44524	8.83015	14.504	9.65515	17.3602	19.0949	18.2183	11.2507	11.3373	7.76743	3.65763	1.47511	3.626
470	10.153	8.46998	10.8041	11.074	10.2564	12.1622	6.00574	10.515	8.83236	9.24057	14.6496	10.5583	16.4676	18.9938	17.6861	12.254	13.1933	6.2762	2.47728	2.28114	3.01084
471	9.71808	6.80935	11.7553	11.3562	11.3531	12.5612	7.47511	10.7828	9.52401	10.1485	13.2663	9.10507	16.0426	17.9607	18.404	11.765	12.4236	7.12358	2.66882	2.32249	1.69276
472	9.44228	7.36848	12.2518	9.86646	11.6216	11.6953	7.66797	10.6237	9.02884	9.81752	12.4763	10.0367	14.7282	17.5015	18.206	10.9724	12.4257	7.26638	4.11012	3.03003	3.3518
473	10.604	7.79833	11.3062	10.6952	11.2883	11.9716	7.22085	10.6167	8.227	11.6043	13.6838	9.15551	15.1262	16.5999	17.417	11.2805	11.6577	7.41677	3.18351	2.9701	2.2383
474	10.3468	8.49334	9.9956	9.98415	10.8033	10.7234	6.30788	11.1929	9.31426	12.0433	12.7036	9.93925	16.0121	17.2406	16.3395	11.8573	11.5253	6.6312	3.03208	3.37893	3.26358
475	11.2298	9.09841	10.4768	10.8921	11.0307	10.2931	6.64181	11.5403	7.65926	11.4159	12.736	10.0617	17.3595	17.0683	16.4353	11.5164	12.6196	7.60005	3.92488	3.35941	2.54302
476	10.3986	8.10476	9.84899	10.6986	11.2831	10.0726	6.69754	10.2136	5.7768	12.2821	11.7208	10.4876	17.9839	16.6953	16.7935	11.1618	10.4104	7.00573	4.68339	3.02817	3.40998
477	10.3081	9.73852	9.48629	8.97427	11.0557	11.2074	6.86472	9.75665	8.10442	13.1173	11.122	10.9911	17.2367	18.2021	17.0214	10.3604	11.6864	7.22661	3.9366	3.0384	2.61265
478	11.0863	9.03923	9.35735	8.34771	11.5382	10.3872	6.17988	10.0158	8.49826	13.4314	10.5525	9.86553	16.2014	18.4217	16.1116	10.1856	12.8157	7.46051	5.39051	3.273	2.98222
479	12.362	9.84326	10.5451	9.22415	12.0219	10.2865	5.08188	10.6411	7.87255	14.1467	12.221	10.088	16.6462	18.1963	16.2482	10.3623	12.1519	7.78984	4.48238	3.36174	3.1477
480	12.0221	9.66416	9.14326	9.21006	11.3994	9.85704	5.54163	9.64838	8.79563	14.1181	11.614	10.7338	17.8076	16.9229	16.6348	10.1073	11.864	7.28156	2.80178	2.65698	2.3909
481	12.1309	9.97214	9.30393	7.45883	9.7783	9.45445	6.81422	9.12442	7.01009	13.2136	11.9673	10.8868	17.1114	16.9584	15.759	9.71103	10.3571	7.25445	4.3296	3.49089	3.80483
482	12.1626	9.98849	10.4165	7.49696	9.47526	8.60702	4.41316	8.33131	8.32789	14.0353	9.53908	8.92401	16.7971	16.6545	16.2014	10.0852	10.4002	6.20209	4.74062	3.61214	2.61789
483	11.529	7.06361	9.28706	7.7688	9.24398	8.66906	5.83246	7.64125	7.42561	13.3826	11.5485	9.22406	17.1947	16.9119	16.8964	9.86527	10.1653	6.18076	3.79373	3.17266	3.08761
484	10.7016	8.6304	8.00936	7.94657	10.2992	9.04041	6.52774	8.63873	7.95264	13.8208	11.9643	9.73146	16.94	16.714	17.0495	9.91986	9.94697	5.77117	3.76264	4.18635	3.54779
485	13.0325	8.15071	10.0896	7.38217	8.73733	9.35941	5.68052	8.78439	7.65129	12.6943	11.8051	8.78779	17.4108	17.04	16.8942	9.09219	8.32346	6.12292	3.93525	2.62725	3.55733
486	12.3184	7.89918	9.30835	8.79442	7.80876	9.71976	6.35403	7.64343	8.0854	11.6674	12.9867	8.74856	18.544	16.9706	18.1614	9.64881	8.84838	6.69664	4.09299	3.27951	3.12242
487	12.333	6.73927	9.96628	6.59358	7.78585	9.64804	6.68317	8.34783	8.04336	12.045	13.4723	10.3966	18.2372	16.9531	18.13	10.0821	8.03769	6.56794	4.34627	3.21865	2.83964
488	12.8175	7.21468	9.82288	8.15543	6.61563	9.6432	5.39404	8.35827	7.48313	11.8717	13.2118	10.1341	16.6796	17.6628	17.6936	9.48961	8.12141	5.68513	4.60181	3.24374	3.01179
489	12.8074	8.10632	7.74426	8.01661	7.03279	9.02677	5.21293	9.0705	7.23754	11.6573	12.5449	9.38399	16.9507	18.9244	18.3538	9.60948	8.09279	6.05424	3.49854	2.5413	1.75427
490	13.0191	7.82637	7.81014	9.40855	6.79027	9.67488	5.21032	10.2471	8.21196	10.9193	12.5185	9.57411	18.0036	17.6529	17.6124	9.04485	6.22448	5.74298	4.82535	1.33434	2.84107
491	12.1552	8.97109	8.85607	9.11972	7.53252	8.5463	5.63393	10.6045	9.60012	11.0723	12.6496	10.1104	17.1021	17.4107	18.6042	8.66155	8.77067	6.83401	4.98444	1.56709	2.3909
492	12.5331	9.38343	9.28184	8.41567	7.25715	7.6914	5.76149	9.68882	10.2794	10.5622	10.9739	9.99227	16.2832	17.8287	20.056	8.08737	9.65908	6.81051	4.14527	-0.103507	3.02609
493	13.3139	9.09024	9.31036	8.16786	7.81222	8.64046	4.24902	11.0068	11.3193	10.1518	12.7743	10.3376	15.6707	17.4817	20.0249	9.36859	7.54562	6.28705	4.56981	1.44166	2.14483
494	13.6139	8.3777	10.4913	8.21096	7.44218	8.30607	4.76755	11.1133	9.2731	10.2986	11.7306	9.71507	14.0592	18.1292	18.7861	8.53557	9.72832	6.60554	4.76181	1.95037	3.43525
495	12.7396	9.00497	10.7937	8.54123	7.43785	7.31477	4.47411	10.7502	9.41692	11.0841	10.1115	10.319	14.3891	17.6186	18.3879	8.31796	9.10131	6.06508	4.61353	1.82911	3.95552
496	12.0996	7.93656	9.55497	10.0463	7.92591	7.30333	4.06225	11.9799	9.08548	9.4769	10.1098	9.78965	14.5988	18.691	18.3321	8.7925	10.29	6.58096	3.70991	1.70368	4.07379
497	12.6192	7.80885	9.9	8.49647	7.5148	6.82374	4.19243	10.5572	10.24	9.51096	11.5034	9.79612	15.0217	17.3261	18.4624	10.2512	8.07019	6.4566	4.18132	1.71715	3.54303
498	11.9994	6.25296	10.731	9.87847	8.42997	6.76918	7.17601	11.2389	9.8674	8.76623	10.4631	10.773	15.1035	17.6189	18.1869	10.3093	8.05818	5.47618	4.47923	2.00937	5.04518
499	11.2238	6.4161	10.3037	10.2208	6.4881	8.44027	5.55774	11.1968	8.79165	10.0063	10.1218	11.064	13.704	17.1098	17.6292	8.98529	8.89713	5.85034	3.55081	1.5002	3.56639
500	12.2431	8.26985	9.37824	10.3053	7.54938	8.22555	7.02537	11.2359	9.81872	9.00845	9.79999	11.1459	15.0693	17.2837	17.8179	9.15518	8.71344	4.9867	4.14211	1.24422	3.96554
501	13.6754	8.0779	7.99972	9.47196	7.00383	8.43235	7.5587	11.7477	9.29169	8.43066	9.74253	12.0443	14.517	17.7154	18.173	9.34835	10.1776	8.47418	3.67025	1.67766	3.92977
502	13.6739	7.00481	8.93801	10.3695	6.59099	8.49482	7.06934	12.1451	7.78227	8.59635	9.41735	11.4925	14.1734	16.8837	18.0559	8.58481	8.12353	8.2674	3.47194	2.41773	4.61837
503	12.3356	6.97055	10.0281	9.17774	6.6005	7.88632	6.51991	11.4498	9.74969	7.32471	9.4497	11.4796	14.9797	18.2978	18.2513	9.38882	8.33971	6.87161	3.4742	1.73759	2.93215
504	13.2222	6.65322	9.67547	9.15784	6.45784	8.82438	5.35007	9.88927	10.3542	7.76794	9.49098	12.4948	15.2772	18.4828	17.4002	9.1464	9.28111	7.18721	3.43724	2.67231	3.20111
505	13.5256	7.18353	9.84216	9.55856	6.52355	8.06715	6.52774	11.0928	9.63021	6.43365	8.64271	10.8312	15.4854	18.8165	17.636	8.99789	8.57886	7.50895	4.56981	1.647	4.18442
506	12.6654	7.26179	9.06052	9.5366	7.21176	8.74298	5.49374	10.3519	8.36816	6.59344	8.69719	12.1991	14.7506	18.8744	17.3006	9.10173	7.83351	6.99163	3.79734	1.05328	4.03182
507	12.8458	6.87827	9.18102	9.84988	7.87447	7.09345	4.88074	11.2916	8.21063	6.62792	8.25922	11.0554	14.9618	17.3676	15.558	8.4489	9.9876	8.00566	3.85277	1.31251	2.85728
508	13.0683	7.70099	7.61654	10.9285	8.04609	5.91428	5.04705	10.7985	8.6381	5.75578	8.40138	9.9358	14.4906	16.7765	15.4805	9.0479	7.74979	6.40924	4.02494	2.36988	2.43143
509	12.1213	8.30723	8.34716	11.7984	8.70102	7.42125	4.92559	11.3964	8.4903	6.14013	7.50671	9.70645	14.591	17.2933	16.2646	9.50679	7.99283	6.62614	3.66033	2.22493	2.67607
510	11.9651	8.17095	7.46872	9.70774	8.89296	6.41763	5.34485	11.6581	8.78413	5.63593	8.13366	9.93925	14.3764	18.1685	16.2774	8.97155	9.44643	4.86668	3.4129	1.2326	2.6713
511	13.0981	9.39082	8.10416	11.7528	8.24668	6.67722	4.23466	11.6786	8.37569	5.77512	8.47671	8.84426	13.7107	18.3027	17.3549	8.06713	6.66745	5.26253	3.58101	0.809378	2.41093
512	13.4921	8.0962	9.07418	11.7839	6.93725	6.9421	5.09886	11.6125	8.97352	5.15108	9.95194	9.92717	14.6929	18.5449	17.5413	7.45783	7.05955	5.40533	3.7054	1.72319	3.00034
513	12.9151	7.43545	9.21878	11.5651	7.49016	7.26681	5.0488	13.5752	8.40401	5.27009	9.60675	8.61405	13.4485	18.7177	16.4675	8.13089	7.30259	7.05417	3.35161	1.66047	2.2054
514	10.6837	7.82364	8.50823	11.6827	7.24807	8.18815	6.11153	13.0387	8.75846	5.03376	8.97172	8.6688	12.7929	17.9301	16.2598	8.09882	7.38207	6.48769	2.46601	1.71901	3.03039
515	11.6759	6.81675	7.74507	12.916	7.73354	8.76102	6.58565	12.1325	9.71739	4.6124	9.47396	9.4021	13.755	16.4329	16.32	8.70965	7.08428	5.75165	2.60978	0.978947	3.4734
516	11.1261	6.59131	8.12785	10.9596	8.25878	9.55696	7.3593	11.7781	8.78634	7.02237	8.46267	9.06757	14.996	17.9767	16.8444	8.40691	7.01469	4.19825	2.90408	1.11181	2.93215
517	10.7698	6.8736	8.68135	11.5029	9.26689	8.5089	5.68226	11.8051	9.04078	7.44372	8.25028	8.56103	13.2507	17.2261	15.6531	8.20534	6.96347	5.55969	2.76121	0.0846451	2.87063
518	11.5395	5.58403	8.82555	12.3785	10.0325	7.89864	6.30962	12.9887	9.73642	7.51226	8.04598	8.96755	12.968	16.6617	16.548	9.12425	5.89561	4.61037	2.94374	1.07047	3.36563
519	11.9994	5.77949	8.66207	12.8406	8.19956	8.40947	6.37972	13.3996	9.60941	7.17081	7.7923	9.10421	11.6031	15.9691	15.8327	8.97078	4.77053	4.86559	3.45076	0.699274	2.7867
520	11.6517	5.73549	9.30996	11.1374	9.19081	6.55094	6.07365	13.99	8.17788	8.08038	7.38072	8.99644	12.2804	16.1839	15.2518	8.50006	5.79988	3.48499	3.86044	0.63888	3.09381
521	12.491	5.57508	9.61482	12.3205	10.3053	8.70734	5.07535	12.9147	9.63729	7.47904	7.62248	9.90002	12.8583	16.9271	15.5584	8.7715	5.27284	3.13432	4.0673	1.35943	3.57545
522	13.6382	6.8954	10.1804	12.8551	9.08533	10.0273	5.90604	13.0052	9.12973	6.72506	6.94233	9.42667	13.8271	16.3753	15.1093	8.78486	5.53425	3.52367	3.46338	1.1736	3.97078
523	12.4981	6.81169	9.39511	11.1809	9.17308	9.27317	5.11846	12.7312	9.64128	7.11362	6.38773	9.12749	13.7386	16.066	15.7762	7.53266	4.49712	3.95929	4.17727	1.47511	3.77526
524	11.3837	7.36809	9.57264	10.3065	9.01789	10.2117	6.43196	11.6864	10.244	7.23094	7.30326	9.05377	13.942	16.6388	15.2459	7.67544	4.38055	4.43973	4.07722	1.09648	3.63697
525	12.0918	7.25907	10.9315	10.1942	9.13418	8.89346	6.77503	11.3424	9.46737	7.32976	7.3488	8.23426	13.5318	16.5744	15.0467	6.94359	5.95072	3.96869	3.99158	0.48139	2.91784
526	12.7966	7.72085	11.2745	9.51878	9.00838	8.08739	5.99311	12.4647	9.60809	7.10352	8.91937	8.78951	14.231	16.1842	14.7028	6.94664	6.05493	3.50126	3.88027	0.759204	2.65032
527	12.4474	7.48529	10.3836	10.2742	8.70534	8.23039	5.26866	10.6772	9.12398	5.90674	8.43926	7.84023	14.8123	15.4295	14.1994	6.76416	4.72991	3.78757	3.75002	1.58893	2.98318
528	12.5238	8.06972	10.6053	10.1607	8.63877	9.50724	5.83681	11.689	9.57844	6.49798	7.36583	7.15091	14.8978	14.2667	14.6777	6.94931	4.152	5.40858	4.40937	1.12343	2.84584
529	11.7128	7.30735	9.61161	9.43756	8.54323	9.70524	5.81635	12.5317	7.87741	5.67041	6.98531	7.85618	14.9655	14.3094	15.1261	6.59694	4.38267	4.86451	3.52648	1.99404	3.20731
530	8.96932	6.65789	9.61643	9.56436	8.56528	9.40737	6.4533	11.5603	8.48808	5.97865	6.30729	7.22075	16.2475	13.867	14.3693	5.90174	5.73842	3.39172	2.6553	2.12969	3.42905
531	11.6636	7.22403	9.08261	12.5393	8.88258	10.1175	6.34228	13.7874	8.40091	6.24231	6.26302	7.66391	15.4523	14.372	14.9214	5.54822	6.87163	3.39823	3.65492	1.38963	3.00893
532	10.8198	7.83338	8.53434	11.8439	8.0984	8.56654	5.92215	14.6549	7.66501	6.55896	6.75122	7.72298	15.5245	14.9886	15.2605	4.8095	7.05744	3.38521	3.63825	0.56269	3.00654
533	11.2126	8.34889	8.82474	11.9227	8.03139	9.31057	4.94082	15.3536	9.10893	6.42944	7.0781	7.70314	15.658	15.0485	14.6725	5.82348	6.42442	2.95393	3.35567	-0.0129151	3.0795
534	11.0907	9.54852	8.86451	12.1539	8.40965	8.75926	4.49544	13.2565	8.56287	6.97106	7.78337	6.34519	15.6617	14.5638	14.7069	6.53815	6.82889	3.07865	4.11417	0.739692	3.67703
535	10.8399	10.057	9.90281	12.0839	7.1815	10.6429	4.7423	13.0887	8.47923	6.14938	7.00574	5.78907	15.9447	16.0752	14.2005	5.25807	5.3117	2.58628	4.59505	0.338766	3.492
536	11.2555	9.94839	10.0888	12.7216	8.43862	10.0858	4.66785	14.3336	9.09079	6.52237	7.03256	5.6813	15.7551	15.7838	13.285	5.14431	5.29757	3.93868	4.45895	0.847937	1.9331
537	9.93909	8.91502	10.1053	12.0627	8.65044	10.3775	3.89159	13.7596	10.0466	7.73093	6.48052	4.7359	15.9254	16.2567	14.3457	6.38735	5.32618	4.33996	3.75948	0.703455	2.12671
538	11.3908	7.78626	9.4168	10.3753	8.79656	10.3824	3.9434	12.5873	9.6342	7.83564	6.69248	5.63431	15.2247	16.4657	15.287	4.96564	6.95747	4.02798	3.9366	1.72319	2.77431
539	11.3136	7.30384	8.70384	11.5207	9.0542	9.18033	4.3152	12.3208	9.69969	8.05515	6.27324	6.41158	14.8101	16.3135	13.8038	5.98725	6.48801	4.95995	3.76354	0.438184	2.64841
540	11.3259	6.57885	8.63958	11.3595	8.10575	8.29947	4.57642	11.4972	10.1289	6.77931	6.50733	7.28757	15.2084	16.7982	13.2798	4.69458	6.77978	3.62778	3.79959	-0.280973	1.84011
541	10.8127	6.41805	9.12037	11.8095	7.09245	7.71076	4.40967	10.4306	7.88848	8.15649	5.31813	6.53056	14.8949	16.476	13.2282	5.67497	6.70242	4.4419	4.58153	0.508335	2.29028
542	11.8831	6.78599	8.65966	10.3397	7.42532	7.96772	3.5028	10.6985	9.65234	8.33605	4.71842	5.16355	13.5099	14.6378	13.464	6.21288	5.76491	3.99146	3.53414	-0.0328917	1.78909
543	10.5682	6.09916	10.6423	10.1831	7.16032	7.753	4.23466	10.2619	10.1519	8.18845	6.19237	5.40669	14.5282	16.8989	14.3135	5.51233	8.11328	3.89494	3.87441	-0.584339	1.68227
544	10.2648	5.85386	10.0852	9.11309	4.54018	7.13921	3.85937	8.44958	10.0497	8.83772	5.81612	5.81106	14.4125	15.8559	14.0209	4.98473	7.85577	4.08473	4.42289	0.250962	1.41331
545	9.76094	6.01194	10.5382	9.75664	6.52787	5.82408	4.98654	10.9998	9.53729	8.74058	5.41092	5.94987	14.6859	15.8406	14.1354	4.75452	7.32519	5.60271	4.86096	-0.280044	0.684647
546	9.88766	5.62258	9.74898	8.95976	5.68101	6.03967	3.0683	10.0188	10.4701	7.5745	6.49627	5.60844	14.5999	13.7747	15.5602	4.81446	7.27609	5.90421	4.69781	-0.186201	0.0737723
547	10.3055	4.88085	9.25975	8.19894	5.8777	6.43963	3.13317	10.5911	9.34302	7.77635	5.66034	5.89426	14.5709	14.4963	14.7773	4.81179	8.47465	6.00796	3.33629	0.464201	0.256892
548	11.8067	5.9329	9.11394	6.81901	5.79254	5.69472	4.73272	10.3137	9.15761	8.25867	6.88401	4.77212	14.7599	14.068	15.0479	3.52751	8.86675	5.12082	3.52738	-0.252634	0.345113
549	11.9964	6.50604	11.2038	6.52355	5.1415	5.82232	4.95432	12.2669	10.1661	8.27045	7.16238	4.56088	14.9358	15.4112	14.9592	4.29754	8.00908	4.80233	3.50214	0.658856	-0.61674
550	11.8175	5.82038	12.2136	7.0722	6.92212	5.25649	3.97344	12.0651	8.66819	7.59637	7.07087	5.15191	15.3988	14.0139	14.3671	5.01832	5.47525	5.34423	2.22805	0.665825	-0.602434
551	11.6688	6.16924	11.579	7.1066	5.37883	4.59518	3.42182	11.4624	9.42798	6.31548	7.14322	5.78562	14.3727	15.0863	13.0481	4.76406	4.55611	4.32911	3.61481	0.790795	0.816741
552	10.0766	6.78327	10.5985	5.92268	6.51923	5.96971	2.88632	12.603	9.1169	6.71413	8.12131	5.48299	14.5665	13.883	13.2809	5.12293	7.46402	3.88626	3.42958	0.777322	0.346067
553	11.0259	6.69878	10.5985	5.74034	7.29519	4.88206	2.8898	12.1095	8.36462	6.31044	8.1145	5.37005	15.4639	12.681	13.7465	6.5748	7.01045	3.45932	2.29025	1.18615	0.900671
554	10.7516	6.75679	9.82489	4.87592	8.10575	5.16849	3.95689	11.4729	7.44862	6.33567	7.53991	4.13409	14.8365	12.8819	12.9725	5.85822	6.07118	3.13758	2.37272	0.525059	2.09381
555	11.7486	6.24361	9.48106	6.66693	6.49502	5.4448	4.37441	13.3352	8.69828	8.19181	7.35391	3.88319	15.6662	12.716	13.1043	7.17265	7.01681	2.30936	4.07136	0.141323	1.3723
556	11.9535	6.34407	10.053	5.9579	7.83383	5.40037	4.78453	13.8122	8.7381	7.61865	7.98171	4.30136	16.0559	12.7443	13.653	6.08384	8.45416	3.89928	3.87125	0.798693	0.633622
557	11.0933	6.7603	9.90803	6.36898	7.66351	5.62872	5.34485	12.7921	9.23416	7.77887	8.10855	4.65658	15.5264	13.708	13.9404	6.79661	8.16415	3.90651	3.05236	0.483713	2.09476
558	11.2924	6.11824	10.9825	6.25253	7.98254	6.33579	6.15899	13.2996	8.14646	7.95969	7.8587	4.81479	14.2693	13.851	13.4389	7.17685	8.534	3.85084	2.6873	0.821921	2.15103
559	11.5715	5.04399	9.76544	7.30882	6.17382	6.36967	6.08454	12.6517	7.78803	8.04926	8.08939	4.82342	14.5747	13.2717	13.6784	6.78019	6.63284	3.7554	1.67822	0.148291	3.50821
560	10.8563	5.52135	10.4921	6.70464	7.12401	6.6253	5.93172	11.7764	6.98752	7.85078	8.29157	4.41948	14.1708	14.2991	12.7072	6.17432	8.79328	3.06889	1.44386	0.956647	4.38518
561	10.9182	4.8314	9.55497	6.3035	6.14702	6.92054	6.61786	11.5124	7.61323	6.7259	7.21771	4.49233	13.5088	14.4684	12.5852	6.47287	8.98721	3.1965	1.19824	1.18707	4.64413
562	11.3971	5.02218	9.37141	6.94664	6.34026	7.00017	5.31698	12.0221	6.77378	7.62202	7.68973	4.53846	12.8323	15.3422	13.4101	6.23426	7.86601	3.22542	1.24376	-0.92487	5.16773
563	9.42886	5.64945	10.2406	6.65367	6.15696	6.35031	6.03882	9.97841	7.95131	7.43279	6.69078	4.52898	12.3317	14.1534	12.5683	6.42476	7.29446	2.3813	1.25863	1.06071	5.33798
564	9.44041	5.28539	11.0801	6.99347	6.79027	7.65708	5.89951	11.6738	7.88627	6.58251	7.3688	4.58976	13.2168	15.4131	12.7371	6.49539	6.44102	1.44788	1.18156	0.0316838	5.82916
565	9.66404	4.62698	9.24288	7.59227	7.3475	7.23205	5.55469	9.12616	7.26276	7.13632	6.49159	4.54019	12.6125	14.7373	12.6091	6.35719	7.32696	2.6152	1.31001	0.287663	4.41046
566	9.75088	4.80959	8.80105	6.38348	6.37008	7.27825	5.53249	11.0181	6.89592	8.82847	5.18746	5.84555	13.6018	15.354	12.8457	6.44118	8.07443	1.44246	1.6656	0.894859	3.69038
567	6.86132	3.93937	9.34289	6.05362	6.92558	5.56536	6.36753	12.3112	6.5689	10.172	5.35942	5.411	13.3358	15.6854	13.3577	6.27015	9.44042	1.96484	1.53355	-0.575047	4.34322
568	9.84219	4.77844	9.31317	7.39792	7.76553	6.25263	6.05667	12.2486	7.07956	10.1888	6.0749	5.40238	13.5571	14.7503	12.9044	6.66833	8.197	1.08203	1.54211	-0.0263877	3.51537
569	10.1556	5.07942	9.8273	6.67024	6.52095	5.81748	5.07927	12.1564	6.29852	10.3688	5.3624	6.2012	14.1235	14.7171	13.2196	5.83149	7.98258	0.849222	1.73726	-0.846358	3.43239
570	9.79523	6.0318	9.4409	4.65588	9.03561	6.05815	4.53506	12.169	6.77423	10.2935	5.51647	6.52884	13.5471	14.1866	13.3468	5.44209	8.68307	1.69371	0.966134	0.29649	3.78862
571	9.62639	6.10734	8.96894	5.93677	7.70242	5.41313	4.34045	12.0021	7.00345	10.0311	6.30005	5.9516	11.8382	14.3273	13.9243	4.68886	6.86562	1.46415	1.27891	0.545036	3.43334
572	10.4728	5.98585	9.5377	5.20495	8.40057	4.73334	4.05224	10.8741	7.488	10.4399	6.37284	6.49564	13.5653	13.8724	14.6321	6.16783	7.25984	3.04539	0.993175	1.20148	2.97698
573	10.9953	6.4196	9.0545	4.58046	9.48218	6.29971	5.0218	11.1024	7.11452	10.9176	6.50265	5.95849	13.183	13.774	14.9816	6.18119	6.12028	2.43046	1.1721	-0.104436	1.94264
574	11.5454	6.03297	8.27366	4.51498	8.58949	7.93956	4.78453	11.2429	7.23887	10.5349	6.16939	5.96798	12.5463	14.383	15.0554	6.67978	5.93447	3.80782	1.8968	0.674187	2.46338
575	12.4112	5.82699	9.57867	4.38362	8.1961	8.02051	3.64038	12.4147	6.81184	11.1787	5.46114	5.70329	12.4604	13.703	14.9446	6.25678	7.02282	4.11148	1.58312	0.0525896	2.77621
576	12.4872	6.37171	8.46043	4.07282	8.21555	8.16043	3.65257	11.4981	7.09151	10.5105	5.4854	5.52136	13.437	13.7149	15.0479	6.27473	6.34706	3.47125	1.39338	0.128779	1.88732
577	11.8674	7.13759	7.93425	3.86397	8.43602	8.73726	3.25072	11.4577	6.36446	9.77505	6.20769	5.73519	14.4568	13.851	14.7436	5.6429	5.11176	2.93477	1.17796	-0.0319626	1.98651
578	11.2275	7.05426	8.70384	4.56595	9.04556	7.93956	3.42922	10.1963	7.4557	9.27842	6.46435	5.09975	14.6829	13.7351	14.6706	6.35604	8.40506	3.27784	1.22077	0.528776	2.6465
579	9.25406	7.72241	9.51882	3.97047	8.23414	6.5879	4.39444	9.8997	6.59899	8.72797	6.28431	4.87213	13.0591	13.7099	14.7155	6.3213	7.21463	2.95176	1.21401	0.809378	1.80339
580	9.08449	7.47906	10.2599	3.98622	9.14844	6.86026	4.47237	11.0172	7.08045	9.19852	5.50924	4.89843	12.6021	13.5707	14.6953	5.65359	7.02882	3.53235	0.71375	0.264899	1.67416
581	10.0188	7.60404	10.4583	5.19583	7.73786	6.37231	3.53807	10.9911	6.24719	9.07699	5.37346	4.01942	12.6999	13.4693	14.0691	5.71162	6.79003	4.01062	0.459113	0.637486	1.17201
582	8.85527	7.65427	9.41238	4.57714	8.07808	6.05683	2.89851	10.4145	7.31763	9.91466	5.5999	4.36214	12.0572	14.2549	12.8045	6.09415	6.13052	5.77949	1.53715	0.927844	1.76763
583	10.1992	9.18018	9.98194	5.99147	7.60256	5.17333	3.3034	10.4163	7.35259	9.26328	6.21152	4.21772	12.7337	14.5295	13.2622	6.04681	7.73531	5.04599	1.26629	0.473957	2.17488
584	9.67894	8.023	10.1173	5.24804	7.01334	5.5636	3.84848	11.2224	7.84821	8.79231	6.69546	3.31285	12.3332	14.8246	13.6125	6.98329	6.81476	5.36881	1.23024	-0.0435769	0.8444
585	10.5578	8.162	10.0253	5.77805	7.10801	5.98159	3.25159	10.6859	7.44862	8.39534	6.42306	3.00893	13.302	14.449	13.4505	6.31481	6.39404	5.33555	1.24781	0.981734	1.36038
586	10.4721	7.13525	10.5009	6.26911	6.9459	6.93418	2.2964	11.2016	7.41897	8.48828	6.37879	2.90547	13.8279	13.6268	14.4898	5.51462	7.17189	4.23693	1.28567	-0.0361437	2.13577
587	10.6666	6.64855	11.1705	5.19832	6.29313	7.54488	1.74522	11.0672	8.20886	10.4025	4.70055	3.99355	13.948	14.0524	13.6769	5.48026	4.89735	5.20469	1.08286	0.31786	2.53825
588	12.1574	5.44308	11.9501	6.1336	6.45525	7.10005	2.64121	10.4489	8.04026	8.74142	4.89676	4.87644	13.3831	14.0119	13.0863	5.08895	6.47988	4.38081	0.573587	-0.0784198	1.58546
589	11.7471	6.62986	12.1706	5.46477	7.10542	6.48274	3.50628	10.6437	6.07417	8.51014	5.19853	4.76522	13.2812	14.7945	14.4288	5.17409	5.68543	4.1545	1.00309	-0.523945	1.30506
590	11.866	6.12875	10.2896	5.07358	7.11363	7.03977	2.75963	10.2732	5.73697	8.12579	3.72628	5.6162	13.0707	16.8314	13.3461	4.89272	3.94359	4.90211	1.86841	0.705313	0.888272
591	12.3028	6.20857	9.71162	7.21144	4.91109	6.5285	4.23988	10.9424	7.31985	8.57869	3.83908	5.46661	13.2302	16.6979	13.032	5.77804	4.97471	3.73696	1.05357	-0.179697	1.20158
592	11.434	7.02779	9.54091	7.73689	5.31874	5.72376	4.09099	11.2972	6.90034	9.1775	4.35025	5.6231	12.891	14.9749	13.1425	5.11644	5.53213	3.45281	0.469028	0.200324	0.821987
593	11.598	6.06567	9.10029	6.17711	5.9901	6.06563	4.78627	10.3137	6.75697	8.10645	3.40621	6.43486	12.884	14.5676	13.696	5.25044	6.25098	4.68014	0.665978	0.542249	1.59261
594	10.4844	5.26281	8.68778	5.7391	5.84312	4.77646	4.43623	10.5754	6.36446	8.48743	3.81184	5.97186	13.7044	15.1397	13.8281	5.13285	6.37779	3.36714	-0.179959	0.175237	1.99843
595	9.95549	5.98235	8.60624	5.35247	5.62265	4.7879	5.56123	8.88918	6.56802	7.80158	4.01529	7.70832	12.5269	15.7178	12.9781	5.63488	6.6452	3.45498	0.132817	0.270474	1.75094
596	11.3386	7.30229	7.87079	5.90154	6.01258	6.16903	5.83072	9.3727	7.14771	6.99882	4.38856	6.68705	12.9461	14.3235	14.1309	5.82538	7.18814	4.27561	0.619557	0.237954	1.32127
597	9.54365	5.25152	7.69526	5.34833	6.67658	6.43655	4.74796	8.66351	5.95602	7.63463	5.46625	7.30136	12.797	14.1126	12.7899	5.63641	6.87799	4.90861	0.0967621	-0.454259	1.15246
598	9.85411	7.09787	6.94736	4.0173	5.13458	6.11051	4.64564	7.74213	6.52863	7.2772	4.81121	7.35697	11.8992	13.7492	11.8183	6.60954	7.10265	3.79408	0.552405	-0.00315909	1.64888
599	9.54365	6.24712	8.017	4.55062	5.61573	6.18179	4.69136	8.84788	7.13974	7.26963	6.05787	7.98379	11.746	14.3762	13.0837	5.93877	7.9681	2.14957	0.812901	1.1657	1.19633
600	9.69609	6.4161	9.25292	3.99367	5.7104	6.14351	4.93995	7.91562	6.37375	6.9042	5.91869	7.67771	11.2643	15.6183	11.5308	6.24724	6.1549	2.50024	-0.211056	0.617509	1.53491
601	6.8848	5.5194	6.94495	4.31151	4.91498	6.09467	6.10587	7.26209	6.5158	6.87897	4.95805	7.00606	10.8697	14.7232	12.5941	5.30465	5.54237	2.45432	0.552405	0.722503	1.35608
602	8.22802	3.87629	7.96639	4.24065	6.82097	5.75104	4.74447	7.22296	6.18834	7.08586	4.79291	7.06598	10.5414	14.1702	11.9758	5.04199	7.8374	2.99261	0.892222	0.555721	0.666526
603	8.85006	3.96234	8.9115	4.0173	6.20451	5.56448	5.96699	7.50037	6.46978	6.9656	3.66287	6.43055	10.7113	14.6687	12.736	6.24724	6.21848	1.82783	0.0715238	0.409381	1.55542
604	10.2984	5.00505	8.60142	5.73247	6.14529	6.53422	5.97613	6.62595	6.12639	7.40756	4.17404	6.19344	9.89461	13.5204	12.3932	6.24877	4.77689	1.92435	0.846703	0.59521	1.20778
605	10.3211	6.6392	8.63194	4.68364	6.3623	6.25747	4.74621	7.64125	5.80468	7.98913	4.46475	6.58617	9.188	13.6409	10.9305	6.25831	7.28422	2.8509	0.335625	0.650959	0.540631
606	10.4571	7.13097	10.3322	5.35827	6.6943	6.61298	5.56732	7.41558	4.92585	7.51563	4.96103	6.80776	9.62833	13.8689	11.0544	6.10179	7.45766	2.03678	0.694371	1.56802	1.23639
607	10.6323	6.94914	11.0427	5.13036	5.81415	5.68416	4.31085	6.73335	5.49182	8.04674	5.482	5.6162	9.62201	14.3228	11.0297	6.36215	8.40118	2.20958	0.979655	0.841898	-0.114593
608	9.04684	5.95743	10.9761	5.64586	4.74379	4.71618	5.62653	6.71031	6.66493	6.80538	5.73482	6.67412	9.66403	15.1965	9.81031	6.55915	8.01331	2.35129	0.359061	0.829354	-0.0716741
609	9.92344	4.57675	10.8021	5.75816	5.50852	5.32161	5.40057	6.94728	6.16754	8.16238	6.62013	6.22017	10.5975	14.0394	10.0094	6.55036	6.13865	1.27616	0.807042	0.230056	0.589749
610	9.23506	4.99026	10.1402	5.287	6.11071	4.92606	6.13591	7.45037	8.02433	6.9656	4.84313	7.07116	9.68263	13.8743	9.96862	6.03536	6.45303	1.08746	-1.04527	1.05096	1.42762
611	7.52473	6.0427	8.9834	6.43901	5.04251	4.27047	6.05755	7.10947	6.69502	7.97062	6.45626	7.05995	10.4309	13.6081	10.6648	6.47096	7.74979	1.97677	0.793071	0.847937	-0.105532
612	8.6883	5.60856	8.3552	6.71914	5.76963	5.21073	5.69053	7.59908	7.81812	6.88318	5.96636	7.23885	10.0914	12.6436	10.3141	5.63297	6.01607	3.04648	0.606938	1.14759	0.862044
613	9.33531	6.49475	8.01459	5.77805	5.38791	4.15123	4.68962	8.06259	8.22567	6.87224	5.72971	6.69136	10.0173	14.1126	10.2179	5.85058	5.42403	2.17632	0.418101	-0.0370729	0.50582
614	9.23804	6.23271	7.51411	4.75367	5.28156	4.49354	5.40057	8.60612	7.40968	7.11866	5.03637	6.03437	10.2509	14.4978	9.71824	5.41842	7.168	2.46698	-0.453074	0.233773	0.588319
615	11.3267	5.72732	7.19238	4.49053	5.89197	5.52488	3.03173	9.97275	8.14646	7.18552	4.92059	5.70329	9.98759	13.7499	9.62429	5.92006	5.05242	2.52482	0.217095	0.294632	0.106677
616	11.2558	5.77054	6.9088	4.69607	4.71094	4.91242	4.71487	8.75396	8.25001	7.39915	4.47581	6.29216	11.2219	14.6382	8.87425	6.59274	4.11526	2.86283	-0.478312	-0.538346	1.05947
617	11.2853	5.73511	6.72082	4.23941	4.42043	5.36869	4.4075	8.28913	8.38498	7.21496	4.70352	5.44161	9.60676	15.0886	9.20361	6.23235	6.16938	3.3393	-0.274152	0.957576	-1.1971
618	10.822	5.24334	6.75014	4.65919	5.34425	4.23219	3.74791	9.1579	6.74591	7.51815	5.482	5.09027	10.4707	13.9017	9.67295	6.22548	5.53425	2.45216	-0.249815	-0.0291751	0.189653
619	9.81871	5.30953	7.37955	4.2506	5.61573	4.94321	3.82802	9.36923	8.53897	6.49378	6.02935	5.06526	11.1331	14.2732	10.2235	5.8941	5.66918	2.54759	0.946755	0.0247152	0.443349
620	10.0539	5.34691	7.00681	3.89629	6.48205	5.21161	4.46061	9.76448	8.13584	7.51479	7.54799	4.36645	11.1055	14.9471	10.42	5.51462	6.9391	2.12788	0.501027	0.141323	0.926422
621	9.92045	5.22193	6.86221	4.92606	5.17349	4.50894	3.71091	10.7002	8.15841	7.4269	9.23816	4.52725	10.4681	15.5237	10.2957	5.41116	6.5205	2.30285	0.72637	0.802409	1.27597
622	8.89292	6.33122	6.05807	3.81839	5.2232	3.82476	2.38347	11.0307	7.95751	8.06944	8.87425	6.15852	9.36539	15.3117	11.2483	5.98725	6.3838	2.36069	0.72637	0.47024	0.979355
623	8.36554	6.60611	6.42961	3.43839	4.92708	3.54096	3.77752	9.2453	8.431	7.37518	7.34454	5.53602	9.79866	14.4704	11.9253	5.88456	6.44102	2.25875	0.640739	0.276513	0.523941
624	9.06771	5.18688	7.37835	3.80513	5.50031	4.56482	4.67873	8.72874	7.16364	6.85836	6.8555	6.25681	10.4209	14.8494	10.5907	6.5454	6.12664	2.28261	0.578545	0.447011	0.964095
625	8.54817	5.6327	6.48665	4.00072	3.89692	4.40159	4.74796	9.93362	7.35392	5.59262	6.42391	6.00721	10.297	16.0237	11.2123	6.02543	4.92772	2.43155	0.732228	-1.25332	0.586411

## Sheet: Fig 2C SyGCaMP 180s pulses
Source Data	Figure 2C	AWC SyGCaMP Data: individual dF/F(%) traces - 180 sec stimulation
		One trials per animal
		Acquisition Rate: 5 Frames/sec
		Stimulus ON:	Frame 25
		Stimulus OFF:	Frame 925
Frame / Animal #	1	2	3	4	5	6	7
1	9.36602	8.74434	4.51232	3.59468	8.65396	0.577239	6.83822
2	7.25932	6.99784	3.3977	4.41867	8.92186	-0.371838	6.39206
3	6.21806	7.32558	3.27118	3.74673	8.22548	-0.444281	5.22294
4	6.39632	6.25784	2.53876	4.07911	8.0025	-0.857718	4.68893
5	5.78656	6.78826	3.31146	3.58455	6.90348	-0.514894	5.24012
6	5.47021	7.50713	2.72569	2.90289	6.95038	-1.01248	5.23815
7	5.34481	7.02414	2.44594	2.26979	7.36773	-0.626486	4.09749
8	5.50217	7.14834	2.16576	3.15967	8.553	-0.700392	4.95544
9	5.07477	7.83357	1.02662	3.30073	8.51325	-1.78996	3.71073
10	5.58454	8.11301	1.38036	2.91725	8.73306	-1.15664	3.45452
11	5.4321	7.72232	1.72621	3.37549	9.20287	-1.10102	3.07757
12	5.08173	6.71624	2.42274	1.63417	9.40559	0.0244038	4.06706
13	4.66252	7.32428	3.09212	2.69974	7.94725	-0.774299	3.98559
14	4.79857	6.76842	3.66782	4.65181	9.25614	-0.226952	3.76325
15	4.72358	6.42257	3.12934	4.01618	7.78826	-0.318054	3.80153
16	3.34835	6.00643	2.11804	2.84334	8.66628	-0.364154	4.39002
17	4.14333	6.40101	2.6447	2.52911	7.69962	-0.332689	4.22903
18	3.54135	4.57774	3.53911	1.59405	7.79025	0.375643	3.98166
19	4.13103	4.88737	4.18967	1.46565	7.71671	2.54491	4.0489
20	4.66703	5.80978	2.28571	1.40822	7.95719	1.65693	4.22707
21	4.03637	4.4212	2.30716	0.968558	9.17465	2.08281	3.79711
22	4.90798	5.3807	1.59575	1.22027	8.58321	2.2866	4.22363
23	4.21504	3.96496	2.88374	0.704594	9.16591	2.18635	3.93307
24	4.18635	4.98224	1.79101	0.388259	9.09874	2.46405	4.59764
25	4.8248	5.1681	3.20245	0.279717	9.15081	2.00085	4.11467
26	2.13416	1.3094	-0.189126	-1.34166	5.35451	0.346739	2.70799
27	-0.560175	-0.482381	-3.64549	-3.69833	2.46447	-3.92374	0.553299
28	-3.3131	-4.17074	-4.37398	-4.87033	-0.91487	-5.53139	-0.0307743
29	-4.57893	-5.36311	-6.71748	-7.27261	-2.88595	-6.96305	0.351082
30	-5.57429	-6.63655	-7.13732	-7.9133	-4.10183	-8.07238	-0.243789
31	-6.39222	-8.03763	-7.90608	-8.84879	-6.0598	-8.3874	-1.24113
32	-7.02165	-8.78842	-8.4415	-8.84034	-6.28238	-9.78797	-1.51255
33	-7.37242	-8.49173	-8.67791	-9.84974	-7.97682	-9.68772	-1.79085
34	-6.72988	-8.31966	-10.145	-10.2307	-7.69263	-9.38002	-1.63477
35	-7.75229	-8.35804	-9.25536	-9.7412	-8.13104	-10.8903	-1.18714
36	-7.71787	-9.90359	-9.5373	-10.3063	-8.07261	-10.0752	-1.45022
37	-7.90801	-9.25803	-9.81748	-10.7071	-8.59172	-10.216	-1.16751
38	-7.73467	-9.20154	-9.30571	-10.2125	-8.0901	-10.7985	-1.23131
39	-8.64193	-9.14031	-9.52898	-10.4148	-9.07107	-11.1113	-1.34813
40	-8.15675	-9.22785	-8.67485	-10.8194	-8.12428	-10.9485	-1.11106
41	-8.21986	-8.27697	-8.81013	-11.0855	-9.05358	-10.2607	-1.27745
42	-7.62444	-8.46887	-9.40902	-10.8211	-9.65258	-10.1015	-1.18714
43	-8.16781	-9.04888	-9.21596	-10.5103	-8.28884	-10.2669	-1.16211
44	-7.81786	-9.26623	-9.06229	-10.6978	-8.17834	-11.2295	-1.55084
45	-8.36041	-9.1071	-9.20282	-10.1234	-8.68194	-10.3704	-1.00996
46	-7.50028	-9.12004	-9.57101	-10.0073	-9.52062	-10.336	-1.62593
47	-8.03873	-9.30245	-8.45376	-9.27113	-9.8851	-10.0766	-1.72066
48	-7.77975	-8.48095	-9.06186	-9.92027	-8.84014	-11.1962	-0.787124
49	-7.62854	-8.71036	-9.64062	-10.0115	-8.84372	-10.5647	-1.05217
50	-8.14159	-8.69139	-8.71031	-10.6247	-9.56156	-10.2256	-2.20951
51	-8.1965	-8.89364	-9.34686	-10.4055	-9.26544	-10.7144	-0.95253
52	-7.62895	-8.80135	-9.11439	-10.2822	-9.05239	-10.3313	-0.908356
53	-7.99489	-8.90442	-8.21911	-10.7063	-8.7833	-10.6342	-1.36383
54	-7.61051	-8.8406	-10.0316	-10.2873	-9.82508	-10.7414	-0.986396
55	-8.21822	-8.86302	-8.88192	-10.4305	-9.48882	-9.88931	-1.14935
56	-7.14254	-9.08942	-8.63282	-9.77499	-8.96375	-10.613	-1.75256
57	-8.20306	-9.21922	-9.06974	-10.4541	-8.54601	-10.8684	-1.435
58	-7.96169	-8.49043	-7.9897	-10.2007	-9.10963	-10.2223	-1.61415
59	-7.7568	-8.77548	-8.85784	-9.14443	-8.72328	-10.0254	-1.29807
60	-7.73918	-8.85569	-8.63194	-10.0174	-8.4204	-10.6833	-1.09094
61	-7.57117	-7.74828	-7.62984	-9.53637	-8.20855	-11.359	-1.02812
62	-7.56584	-8.46025	-8.73658	-9.32224	-8.59927	-10.3042	-1.49194
63	-7.5265	-8.48828	-7.93235	-10.0749	-8.54481	-9.54832	-1.14935
64	-7.51544	-8.27352	-8.4901	-9.69432	-8.94348	-10.2526	-1.7344
65	-6.99952	-8.12561	-8.73045	-10.1327	-8.8465	-9.86114	-1.05217
66	-7.3589	-8.03246	-8.19196	-9.94857	-8.15251	-10.2845	-0.95891
67	-7.31833	-7.95872	-8.96379	-9.37756	-8.33693	-10.2801	-0.898049
68	-8.15675	-8.23083	-8.74446	-9.89831	-8.53289	-10.5175	-0.949094
69	-7.23351	-8.04022	-8.86529	-10.4208	-7.90051	-8.82572	-1.1734
70	-7.48184	-8.02901	-7.60707	-10.0149	-8.72288	-9.51539	-0.761602
71	-7.18761	-7.15748	-8.31673	-9.84552	-7.60717	-10.1553	-0.247225
72	-7.0069	-7.04191	-7.6259	-9.38517	-8.50228	-9.67674	-1.29905
73	-6.85487	-7.32998	-8.21298	-8.91088	-7.89256	-9.24135	-0.739515
74	-7.31055	-8.2567	-8.55796	-9.55241	-7.87864	-9.43929	-0.752767
75	-7.03066	-7.27348	-8.35526	-9.25171	-7.85798	-9.95773	-0.883324
76	-7.34128	-6.83837	-8.53694	-9.38432	-7.50184	-9.03061	-1.18616
77	-6.64834	-7.38043	-7.80189	-9.83369	-7.98835	-9.49746	-0.636934
78	-6.73685	-8.16399	-7.58299	-9.69517	-7.97245	-10.3265	-1.84189
79	-6.94912	-7.60338	-7.46348	-9.48442	-8.42398	-10.1685	-0.230537
80	-7.49618	-6.46017	-7.84348	-9.31295	-6.99108	-9.02183	-0.380727
81	-6.83561	-6.82543	-8.23881	-8.81585	-6.96445	-9.76089	-0.95891
82	-7.3003	-7.07943	-7.69813	-8.99323	-6.71682	-9.53807	-0.977561
83	-6.877	-6.98111	-7.39518	-9.35687	-7.05746	-9.07012	-0.666383
84	-6.44836	-7.96001	-7.16928	-9.11571	-7.62545	-9.55673	0.236721
85	-6.74423	-6.15356	-7.62327	-8.91003	-7.11748	-9.2011	-1.27205
86	-6.67497	-7.25753	-7.05108	-9.3366	-6.72914	-8.94792	-1.04775
87	-6.41312	-7.44469	-7.46348	-9.20652	-7.47044	-9.18318	-0.620246
88	-6.26232	-6.97334	-7.4429	-8.86315	-7.26693	-8.6951	-0.512757
89	-6.14717	-7.23209	-6.43729	-9.31717	-7.54397	-9.19781	-1.30346
90	-5.89474	-6.79956	-7.19818	-9.6221	-8.49235	-9.68515	-0.633989
91	-6.17012	-7.30885	-7.82072	-8.33396	-6.71404	-8.74632	-0.85044
92	-6.35821	-6.64905	-7.13163	-9.27874	-7.06581	-8.4957	-0.351769
93	-6.27994	-6.96429	-6.91799	-8.64564	-7.19658	-8.6812	-0.685034
94	-6.30043	-6.52658	-7.36891	-9.30154	-6.37102	-8.65449	-1.38396
95	-6.1611	-6.55548	-7.45691	-9.00083	-7.0034	-8.30362	-0.933388
96	-5.71772	-6.51667	-8.4901	-9.26438	-6.03674	-8.74486	-0.847004
97	-5.66117	-6.19539	-7.62765	-9.28465	-6.96564	-9.10598	-0.762092
98	-5.34522	-6.87459	-7.13382	-8.76306	-6.9887	-7.66297	-0.403796
99	-5.17967	-6.63224	-6.32303	-8.97465	-6.4843	-8.3424	-0.522573
100	-5.64682	-6.16435	-7.0073	-8.40956	-6.15638	-8.31423	-0.427355
101	-5.57224	-6.98844	-6.87771	-8.16629	-6.87144	-8.158	-0.486744
102	-5.19852	-6.10139	-7.36891	-8.13757	-6.90324	-8.48253	-0.895595
103	-5.13173	-5.94442	-7.16096	-8.59919	-7.74787	-8.16495	-1.00996
104	-5.7128	-6.1527	-6.45699	-8.89483	-5.7132	-8.04275	-1.08407
105	-5.23499	-6.30105	-6.06123	-7.89092	-6.75697	-7.46833	-0.593251
106	-5.26081	-5.50412	-6.61985	-7.93695	-6.64925	-8.45765	-0.262931
107	-5.69149	-6.08974	-6.52792	-7.7545	-6.51053	-7.98677	0.13365
108	-5.09689	-5.4058	-5.39403	-9.03167	-5.65556	-7.6176	-0.433245
109	-5.54479	-6.47742	-6.6772	-7.8774	-5.7605	-8.5096	-0.898049
110	-5.58986	-5.51577	-6.40183	-8.94382	-5.49578	-7.88688	-0.873999
111	-5.75788	-5.40365	-7.24546	-8.14432	-6.35631	-8.83669	-0.270784
112	-4.72645	-6.1872	-6.17024	-8.08055	-5.97831	-8.36033	-0.156424
113	-5.13951	-5.47178	-6.4351	-7.42127	-6.29629	-7.8031	-0.0759295
114	-5.13009	-5.42176	-7.00905	-8.17135	-6.23111	-8.75181	-1.04873
115	-5.16246	-5.56062	-5.36777	-7.46604	-5.7287	-7.68858	-0.619264
116	-4.91495	-5.56665	-5.64051	-8.08055	-5.28074	-7.8653	0.230831
117	-5.87548	-6.34719	-5.4203	-7.61428	-5.63132	-7.47674	-0.281091
118	-5.2604	-5.39631	-5.12085	-7.9889	-5.05935	-7.04245	0.602871
119	-4.64613	-5.29972	-5.85021	-7.76126	-5.51168	-7.39039	-0.4784
120	-4.71006	-4.87926	-5.96273	-7.39298	-5.03669	-7.07977	0.438447
121	-4.47033	-5.2346	-5.93646	-7.72198	-5.31294	-7.67834	0.342247
122	-4.7957	-4.90298	-5.66678	-7.91837	-5.25411	-7.0044	-0.204524
123	-4.6113	-4.57524	-6.05072	-7.97285	-5.54705	-6.74426	-0.517174
124	-4.67072	-5.39416	-5.82701	-7.84362	-6.23906	-7.3249	-0.633498
125	-4.69531	-4.81113	-5.84452	-7.93695	-6.18103	-7.59492	-0.893631
126	-4.3306	-5.33077	-6.48414	-7.40776	-5.03431	-6.21557	-0.542206
127	-4.2888	-4.29235	-5.93296	-6.85702	-4.89281	-6.95976	-0.361585
128	-4.45189	-5.04184	-6.05072	-7.09058	-4.86498	-7.30076	-0.281582
129	-4.06424	-5.32344	-6.30508	-7.07791	-5.86781	-7.12184	-0.295816
130	-4.06055	-4.25828	-6.02927	-7.86558	-5.14322	-7.35527	-0.0646407
131	-4.04703	-4.05991	-5.86466	-7.90824	-5.01841	-6.78707	-0.116667
132	-4.31421	-4.89867	-5.78367	-7.67595	-4.65671	-6.93269	-0.217776
133	-4.5486	-4.14918	-5.95091	-7.28781	-4.91705	-6.71463	-0.370911
134	-4.0499	-4.21128	-6.01088	-7.48167	-5.29783	-6.2957	0.42176
135	-3.24836	-4.19403	-5.72107	-7.82926	-4.57642	-6.93195	0.0644443
136	-3.59749	-4.3635	-5.50742	-7.13239	-4.80218	-6.82841	-0.606503
137	-3.81099	-4.5636	-5.21936	-7.03525	-4.45598	-6.33778	0.856624
138	-3.98884	-4.16341	-5.91676	-8.18022	-4.90433	-7.47747	-0.0523702
139	-4.41542	-4.26044	-5.49779	-6.69189	-4.42259	-6.5862	0.0992924
140	-3.37457	-4.66666	-5.0114	-7.07369	-4.42895	-6.37436	-0.901485
141	-3.5684	-5.02157	-5.93296	-7.24685	-4.71315	-6.37619	0.430594
142	-3.14878	-4.08967	-6.93025	-6.31981	-5.1623	-7.13794	-0.0253753
143	-3.79788	-3.3294	-5.92551	-7.50785	-4.07043	-6.92171	-0.809702
144	-3.54135	-4.39153	-5.93208	-7.05088	-4.05572	-6.10215	-0.126974
145	-3.7192	-4.12762	-5.26839	-6.98964	-4.17179	-6.24923	-0.297288
146	-2.99306	-3.7615	-5.36295	-6.88912	-5.15474	-6.50974	-0.172621
147	-4.01301	-3.95297	-5.01316	-6.27926	-4.26956	-6.25216	-0.279128
148	-3.98105	-3.73002	-4.63447	-7.68904	-4.32601	-6.48486	0.0482474
149	-3.28401	-4.22077	-5.50436	-6.89166	-4.88843	-6.13252	0.0551188
150	-2.77588	-3.34234	-5.47371	-6.55801	-4.57006	-5.96019	0.166534
151	-3.55693	-3.88699	-5.70136	-7.2743	-4.16264	-6.13252	0.41587
152	-2.5341	-2.99778	-4.35997	-7.38115	-3.78544	-5.8358	0.101746
153	-3.35777	-3.57607	-4.90283	-7.12817	-4.138	-6.26716	-0.570183
154	-3.79993	-3.07109	-4.80783	-7.06524	-3.7437	-5.55334	-0.420483
155	-3.36023	-3.43117	-4.70495	-7.25783	-3.70038	-5.6514	0.153773
156	-3.23156	-4.31822	-5.31873	-7.4331	-3.603	-6.32387	-0.0204671
157	-3.46718	-3.48853	-5.21585	-6.62854	-4.64359	-6.02642	-0.281091
158	-2.94717	-3.98919	-5.09677	-6.99133	-3.6817	-5.42163	0.265189
159	-2.86767	-3.82662	-4.93654	-6.91995	-3.89753	-5.85372	-0.506867
160	-2.59106	-3.48076	-4.32889	-6.66232	-3.99888	-5.52115	0.120888
161	-2.62098	-3.51526	-5.46145	-6.63276	-3.89475	-6.29277	-0.404777
162	-2.87504	-3.16381	-4.70276	-6.71681	-4.49175	-6.83683	0.172424
163	-3.59504	-3.20003	-4.22688	-7.04623	-3.61095	-6.17752	0.584711
164	-2.94553	-3.69121	-4.54822	-5.9152	-3.81843	-6.31546	-0.100961
165	-2.64065	-2.25692	-4.7461	-6.51873	-4.19404	-5.40297	-0.132864
166	-2.92873	-3.90726	-4.82096	-6.50521	-3.83274	-5.70884	-0.435699
167	-2.77342	-3.66921	-4.16209	-6.93769	-3.49568	-5.17247	-0.366003
168	-2.59721	-3.05384	-5.03461	-6.99302	-4.70957	-5.79226	0.422741
169	-3.03117	-3.93054	-5.01228	-6.74637	-4.17775	-5.47907	0.0261606
170	-2.39888	-3.15216	-4.09642	-6.99217	-4.07599	-5.73299	0.481639
171	-2.11408	-3.8581	-5.34982	-6.83633	-3.97663	-5.71762	0.293165
172	-2.95331	-3.84214	-4.50619	-6.52718	-3.45593	-4.91636	0.748153
173	-2.95741	-3.51958	-4.16209	-6.24927	-3.78941	-5.7736	-0.277655
174	-2.79596	-3.98574	-4.82272	-6.61967	-3.33232	-6.25289	0.497345
175	-3.19918	-3.56313	-4.72903	-7.24178	-3.57716	-5.93385	0.146902
176	-2.9066	-3.27377	-5.14187	-6.2611	-3.39432	-5.80762	0.45808
177	-2.63286	-3.45015	-4.37398	-6.64628	-3.02626	-4.79269	0.642627
178	-2.87177	-3.26644	-4.46679	-7.26247	-3.49409	-5.51493	0.187149
179	-2.60868	-4.64424	-4.40287	-6.28771	-3.3351	-4.81757	0.281877
180	-2.7894	-3.40228	-4.3337	-6.28517	-3.66739	-4.92184	0.45219
181	-2.83038	-3.13491	-4.85862	-7.00147	-3.39432	-5.52371	1.35775
182	-2.22677	-2.61441	-4.30525	-6.15425	-3.88878	-5.5409	1.02547
183	-2.76112	-3.16596	-5.0206	-6.04951	-3.01275	-4.86952	0.00554624
184	-2.62876	-3.25911	-5.54858	-6.4482	-3.36412	-5.73518	0.603853
185	-2.12104	-3.72441	-4.79776	-6.00051	-3.62724	-5.11027	0.121379
186	-3.02175	-2.94603	-4.89233	-6.57828	-2.93842	-4.50475	1.12559
187	-2.27922	-3.08403	-4.50225	-6.45833	-3.1467	-4.66793	0.146902
188	-2.67753	-3.06505	-3.93881	-6.49846	-3.2715	-4.63134	0.106164
189	-2.53492	-3.61358	-4.60163	-6.88912	-3.25282	-4.70378	0.0212524
190	-2.33864	-3.00899	-4.05133	-6.51113	-3.20552	-5.42016	0.31378
191	-1.71085	-3.43937	-4.7299	-5.57733	-2.84938	-4.4967	0.283349
192	-2.49763	-3.21642	-4.35121	-7.00991	-3.24527	-5.12198	-0.103415
193	-1.8973	-3.43505	-3.66344	-6.15847	-2.91298	-5.07917	-0.129429
194	-3.16599	-3.39969	-3.95676	-6.10145	-4.48301	-5.31479	0.492928
195	-2.84226	-3.49586	-3.98391	-6.58081	-2.99168	-5.29613	-0.0533519
196	-2.14071	-3.2548	-4.28117	-6.25519	-3.44917	-4.99356	0.420287
197	-2.04646	-2.90377	-4.35515	-6.32656	-3.0207	-5.10954	0.3501
198	-1.89689	-3.56141	-3.88059	-5.39192	-2.62243	-5.20613	0.468878
199	-2.27799	-3.06893	-3.90423	-5.79906	-2.96902	-4.8322	0.600908
200	-2.66114	-2.64848	-4.42739	-6.07865	-2.9257	-5.23247	0.191566
201	-2.56607	-2.95034	-4.13494	-6.54322	-3.42533	-5.10002	0.809996
202	-2.51525	-2.93784	-4.21725	-5.64068	-3.49727	-4.50145	-0.385635
203	-1.86165	-3.11464	-3.28475	-6.66908	-2.55923	-4.10851	1.11725
204	-2.57017	-3.08705	-3.71598	-5.68249	-2.72418	-4.85196	0.0732791
205	-1.60553	-3.66447	-3.29657	-5.98489	-2.71067	-4.86952	0.118925
206	-1.93213	-3.22159	-3.55531	-6.17959	-2.56201	-4.56841	-0.144153
207	-1.94402	-2.58681	-4.09248	-5.44133	-3.74688	-4.87977	0.490474
208	-1.83132	-2.64115	-3.48789	-5.89408	-2.09617	-4.59878	0.585693
209	-2.11039	-2.8365	-3.47213	-6.35233	-3.14352	-5.18966	0.300528
210	-2.97339	-3.53467	-3.59953	-5.49708	-2.50875	-4.73744	0.159663
211	-2.03499	-3.45662	-3.35743	-6.05035	-2.69675	-3.83996	-0.203051
212	-2.23701	-2.4734	-3.68183	-6.50352	-1.65934	-4.49926	0.0369586
213	-1.67028	-2.98484	-3.85651	-6.03599	-2.06636	-5.08832	0.32605
214	-2.14686	-2.55447	-3.68008	-5.92998	-2.30961	-4.11692	-0.159859
215	-2.88529	-2.85892	-4.96281	-5.51609	-3.65467	-3.2948	0.406544
216	-1.51046	-2.27589	-3.49621	-5.4464	-2.71384	-5.29723	0.141503
217	-1.65922	-2.22457	-3.45812	-4.96535	-2.5485	-3.9402	0.414397
218	-2.03376	-2.4445	-3.67833	-5.68418	-2.2492	-4.73415	0.402127
219	-1.34327	-3.48508	-4.26978	-5.48188	-2.15619	-4.53109	0.611706
220	-1.99729	-3.1168	-3.76457	-6.15594	-2.6419	-4.34486	0.516978
221	-2.16981	-2.12841	-3.27425	-4.40279	-2.71901	-4.26876	1.09958
222	-2.45788	-2.46693	-3.65863	-5.69094	-3.46905	-4.16924	-0.085255
223	-1.66864	-2.29832	-2.96779	-5.37925	-2.46304	-4.57536	0.438447
224	-1.79076	-2.7274	-4.07278	-4.43151	-2.14188	-4.26949	0.33194
225	-1.16993	-3.52346	-3.25849	-4.55906	-2.564	-3.84215	0.330958
226	-1.83051	-3.47688	-3.78252	-4.48515	-2.2802	-3.89337	1.1359
227	-1.33713	-3.26558	-3.50584	-4.78755	-2.87403	-4.51938	-0.145135
228	-1.51907	-2.4928	-3.99879	-4.89736	-2.22892	-3.44664	1.10743
229	-1.97352	-2.73473	-4.04301	-4.68914	-2.63196	-4.59475	0.227396
230	-1.39736	-2.55533	-6.12121	-5.52031	-1.8553	-3.72141	-0.0454988
231	-2.08334	-2.97277	-4.02068	-4.81584	-2.39388	-3.71446	0.0884944
232	-1.48629	-3.02409	-3.98872	-5.11317	-1.98368	-3.89191	0.593546
233	-1.56456	-2.40181	-3.71029	-4.82598	-2.10451	-4.17985	0.89049
234	-1.16911	-2.74163	-3.25367	-5.50764	-2.37838	-3.41554	0.26617
235	-1.17649	-2.31729	-3.36968	-5.2838	-2.16096	-4.65	0.513542
236	-1.38712	-3.22806	-5.22592	-4.78924	-2.27066	-3.69726	-0.0975254
237	-1.40515	-2.85547	-3.0107	-5.33913	-2.35254	-4.49231	-0.0661131
238	-0.89128	-2.68772	-2.84871	-5.05193	-2.27344	-3.79715	0.916994
239	-1.45965	-2.58681	-2.98268	-5.2158	-2.43362	-4.02436	0.408017
240	-1.20231	-2.18964	-3.34561	-4.96282	-2.22455	-4.1901	0.207272
241	-1.76207	-1.86924	-2.93671	-5.51102	-1.7138	-3.95191	0.808033
242	-1.34286	-2.24053	-4.14414	-5.3594	-2.26152	-3.39359	0.498327
243	-1.24902	-2.64546	-3.6004	-4.81669	-1.44828	-3.5425	0.449736
244	-1.29697	-2.90248	-2.88417	-5.15836	-2.14943	-3.05442	-0.0886907
245	-0.922014	-3.42988	-2.82682	-4.57004	-2.53657	-3.43127	0.636738
246	-0.824076	-2.80243	-3.18319	-4.54554	-2.03973	-3.46932	0.189112
247	-1.00397	-2.14911	-3.09869	-4.58989	-1.73327	-3.98448	0.43403
248	-1.26132	-2.10598	-3.54787	-3.9454	-2.2806	-4.30754	0.477222
249	-0.881445	-2.40483	-3.09519	-4.7111	-2.43839	-4.20802	0.42176
250	-1.33303	-1.98222	-2.7791	-4.57342	-2.27781	-3.63653	0.377586
251	-1.37155	-2.70368	-3.92218	-5.11317	-1.19867	-3.35188	0.423723
252	-1.37401	-3.33156	-3.40646	-5.08276	-1.80283	-3.25675	0.135613
253	-1.63012	-1.90546	-3.88453	-4.81078	-2.88714	-3.45213	0.353536
254	-1.15764	-1.49579	-3.9108	-3.84108	-2.38871	-3.2948	-0.0229212
255	-1.68626	-2.13919	-3.26768	-4.7394	-1.58541	-3.45213	-0.46024
256	-0.838418	-1.1978	-3.09037	-4.73433	-2.57195	-3.34456	0.0585545
257	-0.997824	-2.83607	-3.53473	-5.12246	-1.91532	-3.57214	0.364825
258	-0.899886	-2.27244	-3.63148	-4.71871	-1.62556	-3.44042	0.575385
259	-0.972008	-1.88217	-4.26978	-4.53119	-2.11962	-3.25895	-0.259986
260	-0.819978	-1.54667	-3.23222	-4.47248	-2.80089	-2.76246	0.255863
261	-0.711385	-1.76445	-3.75625	-4.29636	-1.96937	-2.50232	0.772694
262	-1.34614	-2.27503	-3.68577	-5.3877	-2.07152	-3.72397	0.167516
263	-1.01626	-1.31078	-3.55925	-4.11476	-1.54884	-2.47671	0.982273
264	-0.430683	-2.25864	-3.1718	-3.99988	-1.86245	-2.02668	0.189112
265	-1.06216	-1.46387	-3.49533	-5.1081	-1.62118	-2.78331	0.0565913
266	-1.7047	-1.61222	-2.48666	-4.31706	-1.78057	-2.78514	0.751589
267	-0.75933	-1.33364	-3.71029	-4.09955	-1.51148	-2.72184	0.501763
268	-0.669177	-1.42981	-3.56976	-4.29214	-2.84779	-2.67757	0.824721
269	-0.693764	-1.97791	-2.82069	-4.52612	-1.37515	-2.81222	0.618577
270	-1.31787	-1.75065	-3.39157	-4.85385	-1.83503	-2.54147	0.505198
271	-1.05683	-1.78256	-3.16436	-4.85301	-1.81237	-3.26773	0.27206
272	-1.05519	-1.43239	-2.98662	-4.19965	-1.51506	-2.20121	0.660788
273	-1.35311	-1.67389	-2.42405	-4.94846	-1.97176	-2.53891	0.0178167
274	-1.3486	-1.60144	-2.65433	-4.73011	-1.6192	-2.95564	0.462497
275	-1.22484	-2.20776	-3.57326	-3.96694	-1.58978	-2.31097	0.73441
276	-1.31213	-1.76876	-2.77385	-4.92945	-2.38911	-3.17663	0.461025
277	-0.715893	-1.54279	-3.77026	-4.71955	-1.73208	-2.6183	-0.0739662
278	-1.10888	-2.36645	-2.91701	-5.19215	-1.35368	-2.36402	0.596981
279	-1.13182	-1.78946	-4.51276	-3.5995	-1.72334	-2.74599	0.687783
280	-0.519196	-1.60316	-3.28475	-3.95342	-1.05995	-2.71819	0.258317
281	-0.830632	-1.79248	-3.71204	-4.46572	-1.37395	-2.54842	0.336357
282	-0.773672	-1.80972	-2.43631	-3.9133	-1.27061	-3.15248	0.661769
283	-1.30311	-1.64197	-2.96298	-4.79262	-1.14302	-3.06979	-0.0204671
284	-1.51415	-1.07317	-2.79443	-5.06207	-1.98925	-3.24724	0.532684
285	-1.11461	-1.48069	-2.5926	-3.90485	-0.982043	-2.24328	0.382003
286	-0.641312	-1.26292	-2.94152	-4.4767	-1.63311	-2.33512	0.948898
287	-0.492151	-1.07619	-3.64287	-4.59411	-1.32586	-2.26048	0.089476
288	-0.898656	-1.83517	-3.8425	-4.13334	-1.52221	-2.51037	0.377586
289	-1.7338	-0.945097	-3.04353	-4.44714	-0.850876	-2.9432	0.888527
290	-1.19452	-0.988652	-3.37625	-4.41124	-1.05756	-1.68276	0.125797
291	-0.778999	-1.81792	-3.1057	-4.51134	-1.18158	-2.64794	0.569986
292	-0.940045	-1.11457	-2.8544	-4.36183	-1.37713	-2.59672	-1.38985
293	-0.477808	-2.03785	-2.99844	-4.17431	-1.79409	-1.92936	0.0884944
294	-0.955207	-1.07705	-2.34919	-4.34662	-1.40337	-2.17303	0.729502
295	-0.7204	-1.42334	-3.2668	-4.43489	-1.42483	-1.10029	0.37415
296	-0.927751	-1.59713	-3.5181	-4.80486	-1.66173	-3.05589	1.11381
297	0.0188501	-1.60446	-3.0698	-4.3783	-0.441476	-1.85875	0.912086
298	-0.658523	-2.14868	-3.14466	-4.31706	-1.29207	-2.42841	0.609743
299	-0.581074	-1.72218	-2.23361	-3.90654	-1.24438	-1.30811	0.465442
300	-0.414292	-1.63982	-3.25849	-4.84118	-1.48008	-1.66886	1.08927
301	-0.503625	-1.30647	-3.85344	-4.39181	-1.8072	-2.38634	0.637719
302	-0.476989	-2.21293	-3.09782	-4.46995	-0.95899	-2.00876	0.53612
303	-0.555667	-1.66871	-2.96779	-4.23343	-1.57865	-2.26121	-0.00574257
304	-0.883904	-1.1426	-3.11401	-4.44418	-1.53652	-1.42519	0.637719
305	-0.07581	-2.32807	-3.09037	-4.34662	-1.29168	-1.99705	1.04706
306	-0.590909	-1.47854	-2.83164	-4.02818	-1.0671	-0.606728	0.792327
307	-1.21378	-1.59842	-3.24316	-4.76305	-2.22694	-1.60264	0.677966
308	-0.465515	-1.57988	-3.34736	-4.40617	-1.34693	-1.84924	0.26617
309	-0.353234	-1.16028	-2.67403	-5.18201	-1.14064	-1.90851	0.0884944
310	-1.15354	-2.03785	-3.07286	-4.85132	-0.649754	-1.87119	0.378568
311	-0.41716	-1.38366	-3.16348	-3.64215	-1.15177	-2.16059	0.242611
312	-0.203663	-2.15644	-2.78304	-4.42813	-1.07386	-2.43244	1.87114
313	-0.593367	-1.47552	-2.66221	-3.76379	-0.632265	-1.29347	0.130214
314	-1.06462	-1.9322	-2.78873	-4.20387	-0.948258	-2.04315	1.47554
315	-0.756871	-1.88131	-3.086	-4.11391	-1.10566	-2.20487	0.898834
316	-0.469612	-1.54581	-3.17487	-4.27356	-0.958592	-1.80972	0.335376
317	-0.517557	-1.39315	-2.61406	-3.47491	-1.33858	-2.35048	0.756988
318	-0.922424	-1.57384	-3.61616	-4.12067	-1.23643	-1.5419	1.06866
319	-0.838418	-1.0749	-2.12767	-4.44629	-1.41092	-2.46427	1.0878
320	-0.197106	-1.46689	-2.28309	-3.66581	-1.87557	-1.69374	1.10498
321	-0.622052	-1.68035	-3.54787	-3.91752	-1.42722	-2.45329	0.32605
322	-0.348726	-1.83431	-3.27687	-3.62948	-1.20701	-2.44085	0.827175
323	-0.517147	-0.99857	-2.47528	-4.70941	-0.59212	-2.10864	0.0418667
324	-0.798259	-1.43067	-2.7953	-4.4332	-1.38469	-1.73179	0.655879
325	-0.37864	-1.13398	-2.815	-4.23977	-1.13626	-1.54117	0.502254
326	-0.647049	-1.44447	-2.2879	-4.26089	-1.73804	-1.49361	0.67993
327	-0.372903	-1.37849	-3.20026	-3.49096	-1.147	-2.8521	0.864477
328	-0.270457	-1.18271	-2.48184	-3.29034	-1.44431	-2.18547	0.912577
329	-0.622872	-1.15597	-3.38107	-4.28792	-0.986415	-1.8518	0.0521739
330	-1.08265	-1.92918	-1.80239	-4.29383	-1.08578	-1.87485	0.563115
331	-0.574107	-1.04601	-2.87586	-4.46657	-0.351249	-1.59386	0.301509
332	-0.488053	-2.22457	-2.05281	-3.88458	-1.50353	-1.5108	1.30229
333	-0.829813	-1.40393	-2.90037	-3.63202	-0.682744	-1.36665	-0.219248
334	-0.729006	-0.978733	-2.59567	-3.86642	-1.20741	-1.87814	1.00436
335	0.00204892	-1.95376	-2.36101	-4.18022	-0.882277	-1.29347	0.353536
336	-1.02651	-1.39013	-2.03748	-4.12405	-1.2408	-1.959	0.996507
337	-0.630248	-1.41687	-2.29447	-4.56751	-1.78335	-1.57446	0.829629
338	-0.467973	-0.592346	-2.68936	-4.26089	-0.744353	-2.08449	-0.706139
339	-0.906032	-1.79593	-2.87848	-4.07125	-0.838952	-1.28506	0.13365
340	-0.247919	-1.56608	-1.90002	-4.79346	-1.08022	-1.47019	0.00898196
341	-0.0848253	-1.23963	-2.57684	-3.73211	-1.19668	-1.65459	0.75846
342	-0.844155	-0.938197	-2.53175	-3.94709	-1.24517	-1.99705	0.39231
343	-0.420848	-1.322	-2.245	-3.74056	-0.0531425	-1.3736	-0.247225
344	-0.287259	-1.00374	-1.94205	-3.78997	-1.27936	-1.89753	0.322614
345	0.213907	-1.01021	-2.23624	-3.15688	-1.16766	-1.7724	-0.4784
346	0.415521	-1.13915	-2.54751	-3.75788	-1.56236	-1.80497	0.141503
347	-0.665899	-0.668243	-2.7953	-3.32962	-1.00828	-0.986871	1.04804
348	0.226611	-1.17667	-2.26732	-3.05341	-0.534486	-0.799178	0.201873
349	-0.197106	-1.10164	-2.48316	-3.80771	-0.777343	-1.94802	0.813923
350	-0.422487	-0.522486	-2.4223	-3.56571	-0.9888	-1.29969	-0.039609
351	-0.160635	-1.18185	-2.13161	-4.20725	-0.702618	-2.13023	0.45808
352	-0.235216	-1.16158	-2.38903	-3.66665	-1.13149	-1.50385	0.943008
353	-0.0249968	-0.998139	-1.90921	-3.53699	-0.768599	-1.66154	0.256845
354	0.278653	-0.540597	-2.2879	-3.40184	0.085179	-1.46251	0.983746
355	-0.036061	-1.43067	-2.25419	-3.44577	-0.472479	-1.24518	0.866931
356	-0.249968	-1.60963	-1.85317	-2.97865	-0.517792	-2.12876	-0.0739662
357	-0.300781	-0.765703	-2.49892	-3.59612	-0.498713	-1.51373	0.462007
358	0.0327827	-1.56176	-1.73103	-4.09237	-0.536075	-1.33335	0.704961
359	0.102446	-0.696274	-1.94029	-3.38537	-0.684334	-1.80497	0.528267
360	-0.469612	-0.773896	-2.2682	-3.97961	-0.596492	-1.25542	0.376113
361	-0.101217	-1.43886	-1.73847	-3.97369	-0.441874	-1.80423	0.80018
362	-0.0356512	-1.55788	-2.37809	-4.06365	-0.641407	-1.90924	0.585693
363	0.119247	-1.29483	-1.50513	-2.70498	-0.832592	-1.37433	0.568023
364	-0.47494	-0.432788	-1.80502	-3.8132	-0.804372	-1.16578	0.383967
365	-0.648278	-1.03436	-2.89556	-3.67552	-0.697848	-2.07644	0.682384
366	0.316763	-1.06972	-2.3956	-3.52981	-1.04127	-1.41421	0.0158534
367	0.231938	-0.693255	-1.54541	-2.49254	-0.79205	-0.53831	-0.411649
368	-0.142195	-0.915773	-1.95168	-4.05183	-0.485199	-1.12151	0.668641
369	0.352824	-0.899817	-1.872	-3.30639	-1.24239	-0.697099	0.799198
370	-0.195877	-0.511273	-2.45864	-3.54206	-0.738788	-0.986871	0.340775
371	0.593367	-1.65879	-1.86237	-3.77055	-0.497123	-1.14712	0.569986
372	-0.712614	-1.21678	-1.96919	-3.49433	-1.11679	-2.05339	0.617596
373	-0.783917	-1.30647	-2.02347	-3.18265	-0.472479	-1.18993	0.144938
374	0.00901525	-0.897661	-1.3357	-2.97105	-0.342107	-0.846742	0.0246881
375	0.692945	-1.01754	-1.71702	-3.70086	-1.07466	-1.73179	0.4998
376	0.333154	-1.29742	-1.70301	-4.14347	-0.145357	-1.39921	0.659806
377	0.903574	-1.28103	-2.20647	-3.81574	-0.759059	-0.831009	0.581275
378	-0.506493	-1.22368	-2.88592	-4.05014	-0.981646	-0.947723	0.764841
379	0.334384	-0.655306	-1.24289	-3.8132	-0.723287	-0.479039	0.0256698
380	0.376591	-0.529385	-1.87638	-4.1553	-0.326208	-1.78484	-0.121576
381	0.391344	-1.32502	-2.65171	-3.82503	-0.740775	-1.13468	0.610724
382	-0.198745	-1.16287	-0.998166	-3.58514	-1.10884	-1.07102	1.07307
383	0.494609	-1.7058	-1.83041	-3.02258	-1.11401	-1.90375	0.752571
384	-0.15162	-1.29397	-2.28615	-2.69146	-0.396562	-1.69813	0.771712
385	-0.0307338	-0.713523	-2.03135	-3.38453	-0.330581	-0.889549	0.0791689
386	0.193418	-0.826507	-2.02479	-3.46055	-0.589337	-1.03809	-0.274711
387	-0.107363	-0.77519	-1.80414	-3.70762	-1.05041	-1.14164	0.543973
388	0.373313	-0.753628	-1.96831	-3.2574	-0.364763	-1.2064	0.0315596
389	-0.2848	-1.48285	-1.07784	-4.04	-0.690296	-1.70837	0.645081
390	0.136048	-1.3966	-1.7735	-4.00241	-0.857236	-1.35421	0.16408
391	-0.2848	-0.770015	-1.98889	-2.98119	-1.73725	-0.59063	0.577839
392	-0.319632	-1.22109	-2.08914	-3.10958	-0.549987	-1.57776	1.3067
393	0.535178	-0.839444	-1.63253	-3.62526	-0.687911	-0.709539	0.234267
394	0.090972	-0.486693	-2.1894	-3.69495	-0.557539	-0.449037	0.143957
395	1.09617	-0.658756	-1.92147	-3.51376	-0.951438	-0.672952	-0.147589
396	-0.185632	-0.220189	-2.13599	-2.53815	-0.983236	-1.56824	0.667659
397	0.138507	-1.14692	-2.6574	-2.36668	-0.502688	-0.792226	-0.125993
398	0.989628	-0.563884	-1.40137	-3.17547	-0.913677	-0.209755	-0.869581
399	0.634755	-0.29393	-0.99729	-2.43806	-1.11281	-0.529163	0.526794
400	1.17485	-1.07188	-1.42852	-3.05087	-1.03968	-0.536847	0.275496
401	0.785966	-1.01409	-1.23238	-3.12394	-0.140587	-0.888085	0.711833
402	0.648278	-0.754922	-2.60092	-3.45759	-0.439091	-1.32384	0.729993
403	-0.307338	-1.01237	-1.10674	-3.44408	-0.769791	-0.976627	0.1096
404	0.0565502	-0.52766	-1.72665	-3.34398	-0.533691	-0.0337702	-0.00328848
405	1.0511	-0.725166	-1.587	-3.96271	-0.330581	-0.0557226	0.370224
406	-0.109003	-0.8554	-2.157	-3.37692	-0.704208	-0.364886	-0.0872183
407	0.757691	-1.35046	-2.37152	-3.60752	-1.62436	-0.989067	0.111072
408	0.729825	-0.852812	-1.46485	-3.45506	-0.65969	-0.0542591	0.177823
409	0.808094	-1.31078	-1.07609	-3.49687	-0.229622	-1.09041	0.0291055
410	0.919555	-0.383628	-1.80545	-2.7603	-0.734018	-0.0945052	0.45219
411	0.0618774	-0.564747	-1.52308	-3.12985	-0.641009	-0.884061	-0.0945805
412	0.299962	-0.381471	-1.75379	-1.95363	-0.243136	-0.870889	0.417833
413	-0.139327	-1.22454	-1.05245	-3.03905	0.101476	-0.00742724	-0.0194855
414	-0.0672046	-1.29267	-0.950446	-3.35158	-0.526934	-0.659048	0.286785
415	0.878987	-0.686355	-1.22669	-2.87222	-0.592517	-0.85223	0.901288
416	0.458139	-0.182672	-1.06252	-3.02934	-0.983633	-0.234635	0.663242
417	1.19698	-0.166716	-2.22311	-3.4766	-0.491161	-0.581117	-0.204524
418	0.983482	0.0829698	-2.31592	-2.68006	-0.383842	-1.30994	0.810487
419	0.821617	-0.075725	-1.66011	-2.48071	-1.26226	-1.07871	0.78202
420	0.125394	-0.446588	-1.90352	-3.40015	0.227873	0.386253	-0.0508978
421	0.831862	-0.459525	-1.53534	-2.69991	-0.236379	-1.42958	0.421269
422	0.503215	-1.08999	-1.66755	-2.99639	-0.0841456	-0.414645	0.431576
423	0.0553208	0.0635642	-1.33921	-2.46002	-0.187489	-0.830277	-0.111268
424	0.652376	-0.369828	-1.11243	-2.79916	0.194485	-0.931624	-0.301706
425	0.837599	-0.293499	-1.16584	-3.29795	-0.536075	-0.685391	0.000638063
426	0.767116	-0.473325	-1.62727	-2.46255	-1.02219	-1.37616	-0.149552
427	0.917916	-0.882999	-1.49199	-1.98953	-0.604839	-1.43982	0.000638063
428	0.440108	-0.061063	-1.70038	-2.68724	-0.579003	-0.506479	0.24212
429	0.637214	-0.357753	-1.9797	-3.41451	-0.0670542	-0.938576	-0.131392
430	1.0388	-0.233989	-1.68813	-3.42887	-1.10447	-0.711368	-0.0695488
431	0.83555	-1.50657	-1.66186	-2.72947	0.0923336	-0.761127	0.587165
432	0.345448	-0.43667	-1.55504	-2.92502	-0.819078	-1.1581	0.325068
433	0.225381	-0.760097	-1.79188	-2.1855	0.06928	-0.700392	-0.567238
434	0.49379	-1.61006	-2.85528	-2.403	-0.581785	-0.732223	0.419305
435	0.469612	0.26452	-0.220209	-2.83506	-0.17636	-1.53788	-0.278146
436	0.727367	0.013972	-1.14264	-2.56898	-0.322631	-1.11054	0.111072
437	0.324139	-1.26723	-1.19605	-2.99893	0.170636	-0.614778	-0.716446
438	0.458139	-0.295655	-0.563	-2.23238	0.0672926	-0.476843	-0.342443
439	0.802767	0.739742	-1.3611	-2.69568	-0.251085	-0.895769	0.101746
440	0.659342	-1.4656	-1.23895	-2.53139	0.138838	-0.181217	0.687783
441	0.6827	0.0501959	-1.17635	-3.47491	-0.00663784	-0.319518	0.242611
442	0.747446	-1.01884	-2.07907	-3.08382	-0.194644	-0.428548	-0.44257
443	0.678602	-0.169734	-1.26609	-2.89081	-0.169603	-1.12517	-0.252133
444	1.00438	-0.76139	-1.37116	-2.79494	-0.907318	-1.06444	0.0453025
445	1.3863	0.0113846	-1.97006	-2.71511	0.22986	-1.06224	0.727539
446	0.311846	0.127818	-1.80721	-2.98626	-0.278511	-1.03187	0.270588
447	0.294635	-0.309886	-1.56642	-2.6488	-0.809141	-0.683196	0.584711
448	0.863005	0.35853	-1.39481	-2.38104	-0.653331	-1.54666	-0.0361733
449	0.487643	-0.0783125	-1.95693	-2.96303	0.140428	-0.817838	1.1197
450	0.877348	-0.886449	-1.32345	-3.07959	-0.782908	-0.926868	0.0394126
451	1.315	0.400359	-1.07128	-2.52464	-0.227237	0.204414	0.295619
452	1.0679	-0.517742	-1.74548	-2.54955	-0.339722	-1.45921	0.247028
453	0.741299	-0.288324	-1.6067	-2.71173	-0.272549	-0.288418	0.122361
454	0.838418	-1.49147	-1.49506	-2.19268	-0.599672	-0.666	0.815886
455	0.623281	-0.184828	-1.43114	-2.59263	-0.164833	-0.719052	0.0521739
456	0.654015	-0.77174	-1.92541	-2.3198	-0.621135	0.16307	0.0349953
457	1.0302	-0.634176	-1.85098	-1.66137	-0.808744	-0.803934	0.65048
458	1.30311	0.0118159	-1.4075	-2.38526	-0.304745	-1.13249	0.529249
459	0.589679	-0.411227	-1.72534	-2.46255	-0.410473	-0.402937	-0.162313
460	0.318402	0.0191469	-1.66755	-3.11211	-0.307527	-0.928332	0.602871
461	0.671636	-0.228383	-1.59137	-2.47733	-0.384637	-1.26384	-0.0911448
462	0.921194	-0.853243	-1.48368	-2.60192	-0.0447955	-0.188169	0.60827
463	1.27853	-0.767428	-2.41004	-2.70836	-0.691091	-0.77503	0.606307
464	0.26513	-0.779502	-0.979341	-2.42876	0.052586	0.241733	0.271569
465	0.957665	-0.399583	-2.23624	-2.71004	-0.503482	-1.08566	-0.00917829
466	0.953977	0.123506	-1.8755	-2.69653	-0.371521	-0.433304	-0.0067242
467	0.757281	-0.60442	-2.37239	-2.403	0.163482	-0.320249	1.0078
468	1.0093	-0.601402	-1.57912	-2.35148	-0.429552	-0.472819	1.26695
469	0.385607	-0.58329	-1.31425	-2.88152	-0.0781835	-0.574166	-0.113722
470	1.22566	-0.841169	-2.94897	-2.30122	-0.671615	-0.715759	0.519923
471	1.10888	0.155849	-2.20735	-2.92671	-0.478839	-0.73698	-0.0307743
472	0.860956	0.0338089	-1.80545	-1.87465	-0.485994	-0.764786	-0.596196
473	0.935127	-0.313767	-1.55197	-2.29953	-0.531703	-1.23823	-0.352751
474	1.43875	-0.0399325	-1.50513	-2.38611	-0.233199	-0.633437	0.354518
475	1.21993	-0.497474	-1.40663	-2.81098	-1.02616	-1.46178	0.361389
476	0.426585	-0.847637	-2.45207	-1.88817	-0.0483728	-0.769542	-0.208941
477	0.656884	0.372329	-0.912796	-2.32318	-0.061887	0.0361117	0.0826046
478	1.46457	-0.801064	-1.62815	-2.23406	-0.265792	0.00720771	-0.0931081
479	1.52276	-0.42287	-1.02925	-2.229	-0.350852	-0.164753	-0.22661
480	0.860546	-1.01021	-1.2766	-2.22815	-0.257445	-0.182681	0.544955
481	0.324139	-0.795458	-1.79188	-1.5372	0.340358	-0.676245	0.198438
482	0.819568	0.0256154	-0.784523	-2.49676	0.252516	-0.0860901	0.807051
483	0.188091	-0.4647	-1.54628	-2.02247	-0.0114076	-0.795153	-0.286981
484	0.933078	-0.411227	-1.5314	-1.65968	-0.410871	-0.340007	0.282367
485	0.58845	0.633658	-1.66273	-1.65208	0.191305	-0.0143788	0.811469
486	0.346677	-0.863593	-1.80721	-2.13988	-0.0165747	0.394302	-0.645278
487	1.2396	-0.250807	-0.810791	-2.04781	0.0613305	0.0258673	0.45219
488	1.16051	-0.0856435	-2.04799	-2.63022	-0.0149848	-0.28915	0.618577
489	1.57398	-0.390096	-1.28886	-2.74552	0.302201	-0.661975	0.440901
490	0.433961	-0.60097	-0.690836	-2.25265	0.476295	0.243196	1.20461
491	1.03266	-0.0748626	-1.74066	-1.93505	0.695702	0.455769	-0.121576
492	1.61865	-0.136098	-1.37292	-2.30037	0.0434441	-0.70588	0.065426
493	1.37605	-0.469875	-1.17503	-2.32571	0.802225	-0.268295	0.250464
494	1.10601	-0.835994	-1.08222	-2.3802	0.308958	-1.03809	-0.0626774
495	1.56824	-0.655737	-2.49629	-2.10736	0.0569583	-0.385741	-0.00721502
496	0.881036	-0.689805	-1.58393	-1.7074	0.382491	-0.707344	0.623486
497	0.96791	0.0786574	-1.55416	-2.08962	0.0211855	-0.141337	-0.716446
498	0.92898	-0.373709	-0.922865	-2.91319	-0.170398	-0.264271	-0.00230684
499	0.731055	-1.42549	-0.996414	-1.56381	-0.243136	-0.93382	0.153773
500	0.486823	-0.00758975	-2.00684	-2.07611	-0.143369	-1.23676	0.767295
501	0.876938	-0.243907	-2.00377	-2.84097	-0.052745	-0.218536	-0.0715121
502	0.442977	-0.465562	-1.90089	-1.30027	0.0191981	0.356251	0.700544
503	0.973237	-0.130492	-1.69644	-1.75302	-0.00663784	-0.21378	-0.462694
504	0.336433	-0.518173	-2.37809	-3.13323	0.275967	-0.340738	0.0703342
505	1.17403	-0.0420886	-1.38036	-2.34641	-0.257048	-0.543066	1.07307
506	1.29287	-0.675143	-1.49024	-2.1686	-0.0893128	-0.325737	-0.563802
507	1.40515	-0.0162145	-0.612909	-2.66739	0.119759	-0.400742	0.33783
508	0.838418	0.135149	-1.42195	-2.12552	0.23145	-0.707344	0.309362
509	1.09986	-0.870062	-1.04895	-2.24336	0.000516718	0.509552	1.291
510	1.07814	-0.0602005	-1.41626	-1.81172	-0.454593	-0.00962248	0.346664
511	1.17731	-0.722579	-3.17399	-2.04528	-0.070234	0.0196474	0.258317
512	1.26132	-0.265038	-1.39087	-1.41937	-0.00186814	-0.048771	0.687783
513	1.44941	-0.137823	-1.44909	-1.34419	0.292264	-0.202804	0.526794
514	1.24697	-0.442276	-1.21925	-1.96714	0.426611	0.367593	-0.028811
515	1.24779	-0.412089	-1.33745	-2.42032	-0.260625	-0.656853	0.687783
516	1.33753	-0.743278	-1.13607	-1.77625	-0.361186	-0.152313	0.661769
517	0.442157	0.161886	-1.45478	-1.30618	0.0263526	-0.754907	0.641646
518	1.20681	-0.460388	-1.50075	-1.93167	-0.589337	-0.413181	-0.0774019
519	0.94783	-0.390096	-1.66449	-2.88743	-0.694271	-0.918087	0.122361
520	1.10273	-0.883861	-1.38692	-2.08033	-0.209748	-0.577459	-0.0774019
521	0.406506	-0.823488	-0.970147	-2.28601	-0.497123	0.038307	0.481639
522	1.33221	-0.0257017	-2.05543	-1.98277	-1.14064	-0.152313	0.738828
523	1.1101	-0.680318	-1.25033	-0.814994	-0.501098	0.299175	0.163099
524	0.762198	-0.304711	-1.04983	-1.47089	0.436945	-1.0048	-0.111268
525	0.93021	-0.323686	-1.96919	-1.26183	-0.350852	-0.602338	0.0315596
526	0.338072	0.540942	-1.65879	-1.91731	0.469538	0.365398	0.408017
527	1.15149	-0.76139	-1.16102	-2.10905	-0.151319	-0.20756	-0.141699
528	1.37114	0.449952	-2.0226	-1.69685	0.489412	0.3032	1.13786
529	0.774492	-0.621239	-0.977589	-1.98784	-0.0924926	-0.15524	-0.0204671
530	0.734743	-0.749747	-0.98941	-2.36752	-0.371521	0.56297	-0.0577692
531	1.14576	0.0264779	-1.2569	-1.69178	-0.1386	-0.191828	0.203837
532	0.385197	0.481432	-1.60013	-0.82682	-0.232802	0.926649	0.228868
533	1.14821	0.249858	-1.6496	-0.836956	-0.137407	0.0748944	0.0261606
534	1.1601	0.0105222	-0.819109	-1.25423	-0.0133949	0.136361	0.531703
535	1.29738	-0.343091	-1.57561	-1.82101	-0.315476	-0.41062	0.447773
536	1.05028	-0.443138	-0.662379	-1.81172	-0.407691	-0.355373	0.600417
537	1.25271	0.0411399	-1.31031	-1.94603	-0.206171	-0.15707	0.0099636
538	1.12199	-0.214583	-1.90352	-1.27915	0.0231728	0.183925	-0.250661
539	1.25394	-0.72301	-0.662379	-1.85016	-0.0440006	-0.0652353	0.466915
540	1.21296	-0.0632192	-1.05333	-1.7074	-0.21889	-0.264271	-0.319866
541	0.558945	-0.246926	-1.47317	-0.813305	-0.384637	0.134166	-0.152988
542	0.876118	0.126525	-1.18554	-1.87887	0.89285	-0.00962248	0.949879
543	0.851121	0.168355	-1.13125	-1.98615	-0.321041	0.662122	0.78202
544	1.21583	-0.256413	-0.0814293	-1.18539	-0.237174	-0.334518	0.420287
545	0.852761	0.00103497	-1.23238	-1.53298	-0.648561	-0.113165	0.477222
546	1.12773	-0.666518	-1.11418	-1.14315	-0.598877	0.371618	-0.0774019
547	0.536817	-0.215877	-0.678578	-0.475853	-0.00226561	0.409669	-0.0729846
548	1.73625	-0.870062	-0.559498	-1.08529	-0.113956	-0.431841	0.429122
549	0.89251	-0.0666691	-0.692587	-2.18634	0.10863	0.50626	0.107636
550	0.806865	-0.317217	-1.9543	-1.26943	-0.555154	0.620778	-0.471528
551	1.46949	0.427959	-0.434727	-1.23649	-0.630277	1.40448	-0.531899
552	0.582303	-0.277543	-1.07784	-1.28506	0.355463	0.0196474	0.116471
553	0.70196	-0.201646	-1.12206	-0.940008	0.0478163	-0.632706	0.285312
554	0.906032	-0.35991	-0.78321	-0.576371	-0.807551	-0.351714	-0.367475
555	0.885133	-1.30216	-0.553807	-1.38938	0.107835	0.00428072	0.975893
556	1.7715	0.134287	-0.791966	-1.53973	-0.652536	0.302468	-0.0116324
557	0.868742	-0.0688253	-0.894847	-0.850471	0.183753	0.264051	-0.210904
558	0.767525	-0.572509	-1.44034	-0.917623	-0.460555	0.394302	0.931719
559	0.994546	-1.41428	-1.62071	-1.81679	-0.531306	-0.204267	0.602871
560	1.23796	0.268833	-2.83251	-1.62547	-0.216108	-0.104018	-0.681598
561	1.56824	0.284788	-0.620351	-1.39614	0.0605356	-0.346226	0.134631
562	0.685569	0.620721	-1.4075	-1.92069	-0.456183	0.624803	0.174387
563	0.933488	0.346455	-1.22494	-1.19552	-0.982838	0.131971	-0.422937
564	1.22157	0.0489022	-1.01393	-1.11063	-0.225647	0.173314	0.26617
565	1.49735	-0.505236	-2.79968	-1.47596	-0.550385	-0.668561	0.305927
566	1.34163	0.26797	-1.08047	-0.780784	-0.0678491	0.251611	0.149356
567	0.976105	-0.00586481	-1.09185	-1.68417	-0.33217	-0.258783	-0.0523702
568	2.21939	-0.228383	-1.57167	-2.1855	-0.117136	0.474429	0.429613
569	0.601563	-0.643663	-0.99335	-1.42781	-0.449028	0.139654	0.383967
570	1.21747	-1.36253	-1.06559	-2.03852	-0.259432	0.0569665	0.195002
571	1.21788	0.881188	-0.563876	-1.43964	-0.144959	0.165997	-0.504904
572	1.30762	-0.221052	-0.795468	-1.6715	-0.960182	0.0858706	0.634284
573	1.17075	0.481432	-0.995977	-1.32054	-0.418025	-0.164753	0.155246
574	0.772443	0.189485	-1.4469	-0.174301	0.0251602	-0.332689	1.0662
575	1.06872	-0.327998	-2.29184	-2.04612	-0.0388334	-0.217805	0.518941
576	1.23591	0.200266	-1.15533	-1.08529	-0.392984	-0.72271	0.167516
577	0.784327	-0.972696	-0.637863	-0.968727	-0.755085	0.837009	0.991599
578	0.480267	-0.161541	-1.71614	-2.00811	0.370169	0.439305	-0.299251
579	0.481496	-0.383628	-2.06944	-1.89239	-0.363969	0.0361117	0.0992924
580	0.827764	-0.695411	-1.24202	-1.38347	0.238207	0.572483	0.390838
581	1.4072	-0.491005	-0.838809	-0.983086	0.35427	-0.00340263	-0.22661
582	1.41621	-0.804945	-0.995101	-2.06935	-0.323823	-0.273783	-0.0454988
583	1.40638	-0.151623	-1.82384	-0.465717	-0.337735	0.212829	-0.230046
584	0.730645	-0.743278	-1.02443	-1.58492	0.558175	0.291492	1.59727
585	1.61496	-0.995983	-0.971898	-1.62631	0.461986	-0.0626742	0.669622
586	-0.172519	-0.295655	-0.962705	-1.21115	-0.296	-0.159265	1.09467
587	1.43342	0.362411	-1.92322	-1.38262	-1.17442	-0.273052	0.721649
588	0.889641	0.0243217	-0.931621	-1.56972	0.273583	0.775543	-0.0297926
589	0.830632	-0.213721	-1.59969	-1.58661	-0.591722	0.590411	0.22396
590	1.26132	-0.640644	-0.40846	-2.11665	0.0919361	0.727247	0.153773
591	0.803177	-0.756215	-0.570443	-0.741929	0.423431	0.137459	-0.0140865
592	0.539686	0.540942	-0.360741	-1.44893	-0.425577	0.250148	0.869385
593	0.401998	-0.432357	-1.41888	-0.322121	0.0513936	0.358447	-0.0872183
594	1.75224	-0.0218205	-1.17985	-1.48441	0.1134	0.236245	0.414888
595	1.03675	-0.930004	-1.23983	-1.1989	-0.365161	0.408937	0.320651
596	1.23714	-0.738966	-0.534106	-0.677311	-0.233994	-0.179388	0.59011
597	0.882265	-0.529817	-0.883902	-1.31463	-0.204978	0.184656	0.498818
598	1.21542	-0.153779	-0.0157605	-1.5127	-0.1386	0.0463562	-0.361585
599	0.400769	0.00103497	-0.450488	-0.992378	-0.337735	0.50004	-0.134828
600	0.894558	0.111863	-1.22232	-1.91224	0.60468	0.215024	0.670604
601	0.970778	0.371035	-1.35628	-0.888904	-0.650946	0.375643	-0.151025
602	0.0975286	-0.136961	-0.869893	-1.69262	-0.0567198	-0.291711	-0.229065
603	0.00122935	0.0432961	-1.38517	-0.423905	-0.794832	0.52748	-0.0602233
604	1.21419	0.0959069	-0.662379	-1.1761	-0.0412182	-0.0992616	-0.564784
605	0.458958	-0.0856435	-0.939939	-0.824286	0.138838	-0.198047	0.195002
606	0.715073	-1.01194	-1.23238	-1.15498	0.0684851	-0.181217	0.209236
607	0.658933	-0.433651	-0.343667	-0.979708	0.583216	-0.145362	0.336357
608	1.0134	-0.89033	-0.100692	-1.76062	0.093526	0.0891634	0.158681
609	1.15313	-0.679024	-1.01217	-0.654504	-0.00544542	-0.15524	0.411452
610	0.695813	-0.319373	-1.0507	-1.18454	-0.282486	0.23844	-0.0150681
611	0.125394	0.275301	-0.571756	-0.577215	0.224296	0.110018	0.522377
612	0.636804	-0.312042	-0.502147	-1.06544	-0.0682466	0.875426	0.0045646
613	0.527802	0.106257	-0.535857	-0.140936	0.205614	-0.236464	0.659315
614	1.83091	-0.0269954	-0.206638	-1.41134	0.454831	0.370886	-0.149552
615	0.8921	0.0928882	-1.86324	-1.07854	0.265633	-0.134385	0.112054
616	1.00848	-0.252963	-0.711412	-0.468251	0.10704	0.464916	0.240157
617	1.06052	0.236921	-1.88119	-1.43204	-0.227237	0.939088	0.0178167
618	0.856039	0.305056	-0.802035	-1.25676	1.41553	0.330274	-0.918172
619	0.706877	-0.660912	-1.13038	-1.08783	-0.117534	-0.286955	0.227887
620	0.585172	-0.00672728	-2.32292	-1.1913	0.277557	0.343446	0.12776
621	-0.271687	-0.581996	-0.786274	-0.879613	-0.656511	0.56297	0.481639
622	1.20886	-0.645819	-0.978465	-1.02152	0.630913	-0.0666988	0.437466
623	0.651147	-0.679887	-0.844501	-0.791343	0.222706	0.397229	0.321633
624	1.04454	0.0424336	-1.67499	-1.53298	0.399582	0.385521	-0.600123
625	1.05233	-0.895936	-1.17416	-0.510908	0.00806876	0.629193	-0.138754
626	0.761379	-0.558709	-1.21443	-0.270172	0.0545734	0.306858	0.0521739
627	0.808504	0.372329	-0.771389	-1.53804	0.56215	0.43089	-0.0764203
628	0.444616	-0.626845	-1.04194	-1.66897	0.56533	0.706393	-0.376801
629	0.96709	-0.280131	-0.724108	-0.969571	0.0597406	0.637974	1.24339
630	0.556896	-0.821332	-1.08529	-0.61776	0.88013	0.470404	0.124815
631	0.469612	-0.404758	-2.04887	-1.03926	-0.0575147	0.320396	0.13365
632	0.886773	-0.849794	-1.08135	-1.03419	0.184945	0.159045	0.246047
633	1.62193	0.72163	-1.23326	-0.721656	-0.13542	1.33057	0.673058
634	1.48588	-0.545772	-0.990723	-0.295091	0.134864	-0.0465757	0.243593
635	1.36007	0.625465	-1.55022	-1.39022	-0.226839	0.208072	-0.268821
636	1.25927	-0.334467	-1.20174	-0.722501	0.292264	0.387351	0.0767148
637	0.951928	0.3167	-0.896598	-0.432352	0.112207	0.7031	0.673058
638	1.39531	-1.15597	-0.129149	-0.896506	0.734257	0.202584	0.45219
639	1.12199	-0.682043	-1.05639	-0.779095	-0.619148	-0.244148	-0.0204671
640	1.29533	-0.120574	-0.304265	-0.807392	0.0720623	-0.383545	0.459062
641	0.944962	-1.02056	-0.653186	-0.656193	-0.131843	1.01702	0.274023
642	1.53833	-0.968384	-0.266178	-1.54396	-0.208953	0.560043	0.737846
643	1.28344	-0.534991	0.178619	-1.17272	0.00329905	0.512479	0.366788
644	0.852351	-0.335329	-0.780583	-1.05869	0.335191	0.897013	-0.203051
645	1.13838	-0.412089	-1.20174	-0.616071	0.260466	0.848717	0.605325
646	1.22075	-0.507392	-0.102006	-0.910021	0.26921	1.07519	-0.905902
647	0.629838	-0.569059	-1.1492	-0.847092	0.43138	0.26588	-0.469565
648	1.04372	-0.0688253	-1.30068	-0.44291	-0.179937	0.562238	1.11725
649	0.306109	-0.144292	-0.903603	-0.857651	0.617399	0.588215	0.615632
650	0.539276	-0.075725	-0.476755	-1.31631	0.0601381	0.759444	0.0531555
651	0.888002	0.116175	-0.919363	-1.63434	0.43138	-0.0136471	-0.197161
652	0.77736	-0.143429	-0.401893	-1.10472	0.012441	-0.282198	0.45219
653	1.35188	0.232177	-1.05639	-1.49497	0.192895	-0.269027	0.197947
654	1.60963	-0.825644	-1.36547	-1.1761	0.0688825	0.576507	0.637719
655	0.611808	0.496094	-0.102881	-0.673087	0.299418	-0.521114	0.060027
656	1.35557	-0.535854	-0.781459	-0.662106	-0.00385551	0.511016	0.302491
657	1.22525	-0.818745	-1.62421	-1.58746	0.429393	0.0858706	-0.307105
658	0.676553	-0.0696877	-0.353298	-0.196263	-0.361186	-0.147557	0.534648
659	0.792932	-0.495318	-1.0507	-0.984776	0.377721	0.00903708	0.0634627
660	0.741709	-0.934316	-0.944755	-0.739395	0.249734	0.579434	0.689255
661	0.852761	-0.156366	-0.931621	-0.453891	0.409122	0.675293	0.196965
662	0.504444	-0.930004	-1.05158	-0.657883	0.0390719	-0.419401	-0.443552
663	0.302011	-0.812276	-0.837934	-0.735171	-0.0173697	0.239903	-0.253115
664	0.225381	-0.355597	-1.07215	-0.635499	0.538699	1.028	-0.39447
665	1.01299	0.199404	-0.773141	-0.893972	-0.120316	-0.248904	0.102728
666	0.857678	-1.19263	-0.669822	-1.0684	-0.00226561	0.0898952	0.0757331
667	0.869971	0.857901	-0.976276	-1.25761	0.473513	0.201121	-0.536316
668	1.63709	-0.599246	-0.321339	-0.97464	-0.716132	0.0214768	-0.257532
669	0.694994	-1.60791	-1.01612	-0.65197	0.653967	0.790543	-0.786633
670	1.73707	-0.627707	-0.591457	-0.553142	-0.248701	-0.395253	0.11009
671	-0.505264	-0.823488	-0.395326	-0.8737	0.582819	0.434548	0.173406
672	1.39204	-0.452625	-0.92987	-0.59242	-0.429155	1.07373	-0.0219395
673	1.14494	-1.12449	-0.826551	-0.361821	-0.491161	0.409669	-0.270784
674	1.06462	0.155417	-1.1781	-1.26268	-0.036846	-0.220732	-0.141699
675	0.497068	-0.635469	-0.845376	-0.641411	0.113797	0.195633	0.301509
676	1.14821	-0.0843498	-0.998166	-0.224559	0.0247627	0.161606	0.549863
677	0.204072	-0.291774	-1.07609	-0.238074	0.459999	0.395766	-0.706139
678	0.791703	-0.0110396	-0.355925	-0.146004	0.0215829	-0.229513	-0.0896724
679	0.121296	-0.741122	-0.200071	-1.08191	-0.193054	0.332835	0.474768
680	0.865874	-0.628138	-0.147974	-1.05784	-0.121508	0.584191	-0.428827
681	0.517967	-0.105912	-1.03363	-0.644368	-0.524946	0.37857	-1.02468
682	1.05765	0.471513	-1.72446	-1.11486	-0.117534	0.41662	0.700053
683	0.616315	-0.818745	-0.879086	-0.597488	0.326447	0.399059	0.209726
684	1.34696	-0.432788	-0.541549	-1.02659	-0.14178	-0.142069	-0.530917
685	0.00532719	0.0635642	-0.0840561	-1.02321	-0.326606	-0.442451	-0.486253
686	0.280702	0.0277716	-1.09754	-0.643101	0.10863	0.167826	-0.492143
687	1.33426	-0.233989	-1.17153	-0.499504	-0.58099	-0.286955	0.802143
688	0.281522	-0.557416	0.515719	-0.581439	0.524787	-0.0301114	0.0507015
689	0.735153	-1.0473	-0.986783	-0.0885652	0.539494	0.408205	0.201873
690	0.557306	-0.328861	-0.0542862	-1.03672	0.070075	0.535895	0.142484
691	0.705238	-0.708779	-0.580074	-0.431507	0.373746	-0.690148	0.59011
692	0.802767	0.0294965	-0.631734	-0.796411	-0.368341	0.149167	-0.1363
693	0.904393	-0.259432	0.185186	-0.369001	-0.331773	1.06897	-0.486744
694	0.812192	-0.0395012	-0.969709	-1.22298	0.382888	-0.334518	0.23574
695	1.07281	-1.10077	0.12696	-0.600867	-0.151319	0.00976883	0.288748
696	0.908901	-0.156366	-0.419842	-0.825975	0.902787	-0.0612107	-0.17802
697	0.729825	-0.160247	-0.332284	-0.943386	0.554995	0.399059	-0.468584
698	0.75974	-0.464269	-0.720606	-0.367311	-0.0106126	0.422109	-0.168203
699	0.618364	-0.293499	-0.108572	-0.408701	-0.584965	-0.464404	-0.253115
700	0.385197	-1.22799	-1.41451	-0.562433	0.252119	0.549799	-0.666874
701	0.178666	-0.0291516	-0.0604153	-1.01561	-0.234789	0.712612	-0.105869
702	1.35843	0.299881	-0.29945	-0.857651	0.260068	-0.000475636	0.212671
703	0.680651	-0.861437	0.151476	-0.462338	-0.310707	-0.00962248	0.386421
704	0.476989	-0.138685	-0.5433	-0.616071	-0.196631	0.0500149	-0.368457
705	0.429454	0.748798	-0.187375	-0.844558	-0.1386	0.136361	0.1096
706	0.124574	-0.338348	-0.279749	-0.951833	-0.110379	1.06129	0.487529
707	0.215137	-0.40907	-0.833994	-0.60509	-0.241546	-0.20756	0.171933
708	-0.0307338	-0.209408	-0.538484	-0.459804	-0.433527	-0.0385265	-1.76729
709	1.19944	-0.16111	-0.696089	-0.861029	0.15911	-0.346958	0.471332
710	0.8921	-1.10509	-0.95964	-0.280309	-0.052745	0.112579	0.114017
711	0.454041	-0.643663	-0.296823	-0.42306	-0.17318	-0.606728	0.263716
712	0.888002	-1.42118	-0.208827	-0.334791	0.39362	0.504796	-0.467111
713	0.259803	0.253739	-0.16855	-0.695894	-0.119918	-0.111701	0.475749
714	-0.0487643	-0.650563	-0.201384	-0.369001	-0.10084	1.24972	0.316234
715	0.540095	-0.628138	0.163296	0.0816388	-0.527331	-0.56319	-0.490179
716	0.939225	-0.239595	-0.885653	-0.809926	0.300213	0.434548	-0.0327375
717	0.87284	-0.477637	0.538484	-0.876234	0.24099	0.0829436	-0.363058
718	0.883904	-0.760528	-0.45793	-0.23723	0.255696	0.0920904	0.195002
719	0.751544	-0.603558	0.277998	-0.297625	-0.419615	0.0141593	0.230831
720	0.671636	-0.732497	-0.830491	-0.413769	-0.186297	-0.438792	-0.503432
721	1.27525	-0.572509	-0.220209	-0.16163	-0.143767	0.565531	0.0713158
722	0.101626	-0.752766	-0.218896	-0.0780066	0.00329905	0.286735	0.111072
723	0.601153	-0.621239	-0.158043	-0.300159	-0.268574	-0.11975	-0.0567876
724	0.727367	-0.574234	-0.0971898	-0.711098	0.715973	0.568458	0.79429
725	0.632707	-0.15421	-1.00736	-0.54385	-0.357211	0.149167	0.171933
726	0.624921	-1.11026	-0.0604153	-0.333946	-0.152114	-0.21378	-0.30416
727	0.422487	-0.156366	-0.314772	-0.555676	-0.290436	0.571751	0.0403943
728	0.0770394	-0.204233	-0.750813	-0.298469	0.134466	0.386253	0.105182
729	0.565092	-0.39829	-1.13957	-0.714899	0.029135	0.115506	-0.300724
730	0.925292	0.1248	-0.617287	-0.627896	-0.0726188	-0.142801	-0.168203
731	0.463056	-0.0330327	0.212329	-0.302693	0.0871664	0.239172	-0.398887
732	0.800718	0.172667	0.012696	-0.386739	-0.42041	0.626998	0.438447
733	0.212678	-0.148604	-0.0849316	-0.708564	-0.169603	0.140386	0.453172
734	0.108593	-0.314199	-0.921114	0.271271	-0.597684	0.849449	-0.903448
735	-0.231118	-0.316355	-0.350234	-0.270172	-0.208556	-0.565751	0.218561
736	0.0172109	0.443914	-0.774892	-0.196263	0.11817	0.0320871	-0.192744
737	0.370035	-0.30428	-0.590144	-0.781629	-0.140985	-0.570141	-0.13041
738	0.944962	-0.401739	-1.16584	-0.250745	-0.104814	0.419182	0.288748
739	0.0213088	-0.173184	-0.384819	-0.925648	0.0255577	0.358447	-0.567238
740	0.141785	-0.137823	-0.556434	-0.871166	-0.226442	0.624803	0.675512
741	0.640492	0.234765	-0.841436	-0.595798	-0.378278	0.26588	-0.289435
742	0.0856449	0.317993	-0.127397	-0.329723	0.371759	-0.00669549	-0.189308
743	0.389295	0.531455	-0.340164	0.0791047	-0.472877	0.0320871	-0.390053
744	0.432322	0.514206	-0.558623	-0.29129	0.137646	0.131239	-0.0955622
745	-0.118428	0.351199	-0.199195	-0.0256362	-0.141382	0.0222085	-0.67031
746	0.428224	-0.181809	0.360303	-0.031549	0.093526	-0.268295	0.394274
747	0.501166	-0.18914	-0.453552	-1.04602	-0.724082	0.7031	0.269606
748	0.0614676	-0.0640817	0.193504	-0.440376	0.0577532	0.113311	0.476731
749	0.68229	0.0713264	0.184748	0.385725	-0.205773	-0.12597	0.304454
750	0.844155	-0.453057	-0.397953	-0.829354	0.26603	0.595899	0.323105
751	0.622872	-0.0942682	0.509152	-0.313674	0.146788	0.55675	-0.197652
752	0.447894	-0.0826248	0.495143	0.103601	0.436548	0.199657	-0.177038
753	0.362659	-0.0377763	-1.00955	-0.553987	-0.10084	0.247221	-0.11225
754	0.890051	-0.00370863	0.0376501	-0.448823	-0.0761961	0.802251	0.566551
755	0.401179	-0.221052	-0.0052535	-0.140091	0.262453	-0.00962248	-0.207469
756	0.468383	-0.366378	-0.311708	-0.90073	0.0994882	-0.184144	-0.392507
757	-0.231528	0.116175	-0.492954	0.0731919	0.257684	0.689196	0.788891
758	0.34217	0.013972	-0.179495	-0.359287	-0.270562	0.443329	-0.581962
759	0.115559	0.509031	-0.277122	-0.343238	-0.0308839	0.320396	-0.205505
760	0.605251	-0.0442448	-0.208827	-0.0653364	-0.138997	0.65517	0.2539
761	0.347087	-0.145154	0.263551	-0.406167	0.237412	0.785055	0.184695
762	-0.528621	-0.581996	0.0621665	0.752741	0.398787	0.993603	0.505198
763	0.297503	-0.619082	-1.13388	-0.891438	-0.0940825	-0.171705	-0.0661131
764	0.885953	0.0497646	0.292007	-0.675621	-0.0956724	-0.408425	-0.537298
765	0.122116	-0.652288	-0.988534	0.276339	-0.241149	0.752127	0.0919301
766	0.331105	0.122644	-1.00298	-0.374069	-0.240751	0.275759	-0.4784
767	0.538046	-1.10638	-0.667195	1.02304	-0.0821582	0.0609912	0.175369
768	0.449943	-0.324548	-0.899662	0.264935	0.320485	0.435646	-0.0445172
769	0.406916	-0.702742	0.896598	-0.901574	-0.0718239	0.549799	0.340775
770	0.542554	0.0980631	-0.724108	-0.344082	0.360232	0.36613	0.136104
771	-0.166782	0.681957	-0.628669	-1.02067	-0.516599	1.14398	0.236721
772	0.614266	0.558192	-0.92987	-0.079696	0.977115	0.41845	0.348137
773	0.574107	-0.287462	-1.03188	0.371366	0.322472	0.165265	0.558698
774	0.250378	-0.371553	0.458806	-0.425594	0.386466	-0.0820655	0.357953
775	0.556487	0.409847	0.133527	-0.229628	-0.0547324	-0.0985298	0.562133
776	0.51182	0.40769	-0.000437792	-1.14738	-0.297988	-0.152313	0.0295963
777	0.428224	0.447795	0.0433414	-0.195418	0.645222	-0.199877	-0.454841
778	0.41757	-0.0761563	-0.623854	-0.347461	-0.0408208	-0.359398	0.060027
779	0.634755	0.135149	0.201822	0.52003	0.266825	0.0525761	0.327523
780	0.334794	-0.445294	0.422907	0.0639004	-0.690694	0.406742	-0.883324
781	0.470842	-0.472031	0.203573	-0.109682	-0.30077	-0.294638	0.619559
782	0.678193	0.654357	-0.851943	-0.881302	0.044239	0.584922	-1.22788
783	0.498707	0.318856	0.874708	-0.0788513	0.401172	0.18173	-0.164277
784	0.304879	-0.376728	0.665006	-0.0877205	0.344731	-0.292443	-0.0921265
785	0.519196	-0.0843498	-0.135716	-0.242298	0.653172	0.358447	-1.53415
786	0.583942	0.0415711	-0.0267053	0.170753	-0.354429	0.522724	-0.88676
787	0.072122	-0.924397	-0.012696	-0.0628023	-0.531703	-0.0114518	-0.0185038
788	0.0782687	-0.63935	0.0135716	-0.570036	0.145993	0.0664793	-0.223666
789	0.352824	0.212341	-1.0113	-0.583973	-0.0773885	0.819082	-0.481836
790	0.154898	-0.998139	-0.638301	-0.302693	-0.0690415	0.209536	-0.0140865
791	0.0307338	-0.174478	0.14272	-0.432352	0.323664	-0.661975	-0.288944
792	-0.0311436	0.423646	0.0179495	-0.553142	0.338769	0.355154	0.187149
793	-0.0430273	0.156711	-0.133964	0.462169	-0.308719	1.35728	0.475749
794	0.424946	-0.257275	0.0490327	-0.670553	-0.179937	-0.117921	-0.513739
795	0.660162	-0.68118	0.425972	0.294922	-0.113559	-0.0674305	1.06326
796	-0.253656	-0.137823	0.121268	-0.935784	0.615809	-0.318786	-0.206487
797	-0.00368806	-0.10893	-0.750375	0.25142	0.100681	0.190145	0.190094
798	-0.210629	-0.71956	-0.358552	0.0465844	-0.324618	0.698709	0.396728
799	0.128672	-0.176203	-0.392699	-0.367311	0.167059	-0.30781	-0.0106507
800	-0.374543	-1.20858	-0.61466	-0.811615	-0.445054	0.0679428	-0.162313
801	-0.263901	0.0765013	-0.574383	-0.401943	-0.34489	-0.239391	0.218561
802	-0.45568	-0.0282891	0.464497	-0.0543555	0.751746	-0.437329	-0.0351916
803	0.369625	-0.657462	-0.0871206	-1.06671	0.454831	0.905062	0.104201
804	-0.219234	-0.275387	0.522286	0.0613664	-0.13065	-0.53831	0.105182
805	0.103675	0.357667	0.290694	-0.569191	-0.583773	0.499308	0.28973
806	0.172519	0.0795199	-0.486387	-0.325499	-0.0491677	0.382594	-0.693869
807	-0.256935	-0.434945	0.0687333	0.114581	0.926238	0.669805	0.300037
808	0.472071	0.0135408	0.283251	-0.139246	0.316112	0.426865	-0.388089
809	0.0598285	-0.118849	0.655375	0.157238	-0.349262	0.99836	0.547409
810	-0.737201	-0.356891	0.31915	-0.250745	-0.296795	0.433817	0.0187983
811	0.506903	-0.495318	-0.113826	-0.673087	-0.0587072	0.368691	-0.244771
812	-0.256525	-0.939491	-0.260486	0.300835	-0.0563223	0.119531	-0.163295
813	0.563863	0.10755	0.207513	0.24044	-0.0416157	0.485405	-0.125011
814	0.0860546	-0.327998	-0.0998166	-0.705185	0.648005	0.382594	-0.295816
815	0.146293	-0.950272	0.114701	0.610834	0.00926118	-0.15085	-0.818536
816	-0.224562	-0.863593	-0.056913	-0.0492874	-0.213723	0.246123	-0.302687
817	0.104495	-1.3828	0.310832	-0.460649	0.00806876	-0.0502345	0.559679
818	0.00573698	0.214497	-0.167674	-0.430663	0.0772295	0.34125	0.0835862
819	-0.32168	-0.574234	0.274058	-0.337325	-0.38583	-0.219268	-0.121576
820	-0.190959	-0.379315	-0.116015	0.00181607	-0.402921	0.738224	1.00387
821	0.194647	-0.132648	-0.621227	-0.203865	-0.246713	0.255636	-0.339008
822	0.131541	-0.119711	-0.0297699	-0.379137	-0.525741	-0.068894	0.24212
823	0.112281	0.24339	0.246039	0.0681238	-0.255458	0.611997	-1.08063
824	0.250788	-0.320236	-0.475004	-0.554831	0.14639	0.189413	0.125797
825	0.0725318	-0.143429	1.10455	0.795397	-0.235981	0.268807	0.154264
826	0.523704	0.185604	-0.558623	-0.553142	-0.649356	-0.126702	-0.223175
827	0.103675	-0.157229	-0.305141	-0.243987	-0.465325	0.0657475	-0.225629
828	0.00901525	0.295138	0.398828	-0.69336	-0.479634	-0.137312	-0.155442
829	0.102036	0.263226	0.332284	0.163151	-0.166423	-0.703319	0.501763
830	0.0647459	0.00534733	-0.471064	-0.220758	-0.439091	0.545408	-0.713011
831	-0.045486	0.061408	0.204887	-0.766425	0.39203	0.255636	-0.102434
832	-0.239724	0.332655	0.150163	-0.37069	-0.0547324	0.127946	-0.152988
833	-0.199565	-0.24477	0.235532	-0.811615	0.168649	-0.0798702	0.377586
834	0.413062	-0.413383	-0.640927	-0.0205681	0.277557	0.671269	-0.121576
835	0.277834	-0.781658	0.196131	-0.597488	0.11181	0.663585	0.106655
836	0.193828	-0.18569	-0.0398391	-0.306072	-0.734018	-0.0977981	-0.224647
837	0.351185	-0.0399325	-0.106383	-0.272707	-0.330978	0.241733	0.952824
838	-0.0754003	-0.605714	-0.637863	-0.497815	0.229065	0.291492	0.372678
839	-0.526163	-0.0602005	-0.13484	-0.0729385	-0.360789	0.568458	0.482621
840	-0.301191	-0.118417	0.0267053	0.243818	0.147583	0.239903	0.736374
841	0.331925	0.203716	-0.0595397	-0.485989	0.357847	-0.254392	0.488511
842	0.358561	0.128681	0.462308	-1.30027	-0.434719	0.366862	0.673058
843	0.73966	-0.682474	0.204449	0.101911	-0.0165747	0.46894	0.219543
844	0.514279	-0.0213893	0.73155	-0.321276	0.342743	-0.0176717	-0.2325
845	-0.107773	-0.335329	0.184748	-0.0442193	0.44569	-0.265002	0.126778
846	-0.123755	-0.754922	1.05858	0.0664345	-0.00147066	0.0884317	-0.450423
847	0.582713	0.267539	0.270118	-0.124042	-0.350454	0.396497	0.0227249
848	-0.392573	-0.224501	0.470189	-0.596643	-0.720902	-0.253294	0.114508
849	-0.175797	0.468064	0.442608	0.379813	-0.529318	0.360642	-0.80283
850	0.881445	-0.209408	0.394888	-0.748686	-0.583375	0.00501247	0.570968
851	-0.096709	-0.0248392	0.475442	-0.154873	-0.345685	0.350763	-0.628099
852	-0.163914	-0.704467	-0.369059	-0.988999	-0.449823	-0.28915	-0.343425
853	0.618364	-0.132648	0.293758	-0.42306	0.341551	0.542115	-0.126974
854	0.548291	0.188623	-0.0135716	-0.192039	-0.189874	-0.0674305	0.573422
855	0.30447	-0.653581	0.843187	0.1395	0.391235	-0.142069	0.37415
856	0.258164	0.0545082	0.408022	-1.08698	-0.0245243	0.120994	0.261753
857	0.431093	-1.23187	0.217583	-0.920157	-0.58099	0.0609912	0.157209
858	0.592957	0.0670141	-0.220209	0.101067	0.0549709	-0.168778	-0.507849
859	0.45486	-0.0192331	0.962267	-0.858495	-0.236776	0.415889	-0.241335
860	-0.00204892	0.00836598	0.818671	0.397551	0.296239	-0.480868	0.748153
861	0.202843	-0.60787	0.66413	-0.204709	-0.0857355	0.592606	0.0973291
862	0.742529	-0.755784	0.108135	-0.55821	0.14639	-0.20756	-0.533862
863	-0.118837	-0.272369	-0.0429036	-0.771493	0.00886371	0.324054	-0.570183
864	-0.109412	-0.623395	0.14666	0.332933	-0.518189	0.392473	-0.860256
865	-0.472481	-0.902404	0.754753	0.465548	0.288687	0.677488	-0.613375
866	0.137278	-1.39401	-0.606342	-0.830198	0.257286	-0.9737	0.183222
867	0.343809	-0.512567	0.211016	-0.126576	0.241387	0.645657	0.410471
868	-0.315943	0.589241	-0.236845	0.230303	-0.0141899	0.327347	-0.504904
869	0.595006	-0.26935	-0.245163	-0.468251	-0.472479	0.157582	-0.1363
870	0.522475	-0.93216	-0.263113	0.276339	-0.156884	0.73676	-0.827862
871	0.723269	-0.236145	-0.330533	-0.840335	0.0664977	-0.434768	0.238685
872	0.629838	-0.399152	0.0941253	-0.0678704	-0.00544542	-0.426353	0.287766
873	0.000819568	-0.510411	0.433414	0.370521	-0.104417	-0.387204	-0.313976
874	0.605661	-0.459094	-0.042028	0.0499631	-0.288846	0.942381	-0.11814
875	-0.667948	-0.516879	0.157605	0.0639004	-0.491956	0.274296	0.416851
876	0.222513	0.0829698	-0.108572	0.0170204	-0.220877	0.380033	0.652444
877	0.391344	0.146793	0.161545	0.0698132	0.324857	0.595899	-0.106851
878	-1.07978	0.0648579	0.325717	0.173287	0.440522	0.0891634	-0.389071
879	0.567551	-0.116692	1.43946	-0.157407	-0.00385551	-0.377326	0.225432
880	0.138507	-0.390096	-0.957013	-0.685757	0.243374	-0.27854	-0.331155
881	-0.0516328	0.376641	1.1619	0.242974	0.304983	0.910184	-0.0317559
882	0.420438	-0.563884	-0.226776	0.107824	-0.589735	-0.460379	0.681893
883	-0.243821	0.10755	0.2618	-0.665485	0.197267	0.125751	-0.0533519
884	-0.0983482	-0.0804686	-0.99335	0.344336	0.0537785	0.113311	0.60189
885	0.0926112	-0.401308	-0.220209	-0.303537	0.152352	0.299175	0.335376
886	-1.2064	-0.871355	0.283251	-0.961969	0.037482	0.479185	0.147393
887	-0.620413	-0.0545945	0.437354	0.0364482	0.475898	-0.591362	-0.231519
888	0.036061	-0.0494196	0.012696	-0.31114	0.570497	0.298443	0.14592
889	0.225381	0.0200093	0.274058	-0.991533	-0.301962	0.113311	-0.240353
890	0.240953	-0.0386387	-0.68602	-0.820062	0.436945	0.384058	-0.936333
891	-0.24751	-0.460388	0.269242	0.38657	0.0176082	0.172217	0.329486
892	0.337252	-0.115399	0.37081	0.498068	0.153942	-0.0480392	-0.391525
893	0.327008	-0.635469	0.0586641	-1.4616	-0.00504794	0.183925	0.0045646
894	0.155308	0.221828	-0.0148849	-0.603401	-0.465325	0.256368	-0.0543335
895	0.332745	-0.330154	0.264864	-0.134178	-0.231212	-0.153045	-0.341462
896	-0.295864	-0.354303	0.277998	-0.0100095	0.101078	-0.18634	-0.833261
897	0.273326	0.101944	-0.916299	0.369676	0.655159	-0.681001	0.00309215
898	-0.49297	-0.193452	-0.383944	0.502292	-0.290436	0.753224	-0.0759295
899	0.0639263	-0.417695	-0.325717	0.00857355	-0.322631	0.327347	-0.102434
900	-0.0631067	1.19858	-0.031521	-0.0205681	0.338371	-0.262807	0.113035
901	0.306518	-0.144292	0.696089	0.820738	-0.378675	0.414425	-1.05904
902	-0.231528	-0.037345	-0.29945	0.00350544	0.189318	-0.0440146	0.014381
903	-0.687208	0.115312	1.24814	-0.0281702	0.253709	0.408937	-0.698286
904	-0.407735	-0.471168	0.223274	-0.609313	0.0871664	-0.111701	-0.290417
905	-0.0635165	0.337399	0.065231	0.306747	-0.0157798	-0.118653	-0.427355
906	0.302011	-0.383628	-0.201384	-0.148538	0.078422	-0.458184	-0.392507
907	0.0508132	0.137737	0.0564752	0.234527	-0.227237	-0.292443	0.480167
908	0.0557306	0.373192	-0.552931	-0.327189	-0.263407	-0.0432829	-0.19029
909	0.147522	-0.300399	-0.636112	0.161462	-0.364763	0.395766	-1.34813
910	-0.464285	-0.717404	0.23203	0.0934644	-0.390997	-0.34769	-0.0400998
911	-0.045486	-0.0619255	-0.761758	-0.0526661	-0.330183	-0.771006	-0.750313
912	0.83391	-0.0959931	0.383944	0.84819	-0.741968	-0.115726	-0.911301
913	0.313075	-0.243476	0.0612909	1.05809	0.422238	1.55559	-0.21434
914	-0.383968	0.247702	0.0267053	0.136121	0.155532	-0.364154	-0.606503
915	0.20899	0.0437273	-0.691711	0.692346	-0.312297	-0.334518	0.472805
916	0.676963	0.572854	0.4877	-0.206399	-0.437104	0.110018	-0.0783836
917	0.00491741	0.126956	-0.233343	-0.379137	0.462781	0.485405	0.0983108
918	-0.145473	0.0786574	0.351985	-0.351685	0.550226	0.628461	-0.468093
919	0.291356	0.490919	-1.78269	-0.201331	0.2708	-0.431109	0.532684
920	-0.0307338	0.114019	1.00911	-0.0307043	-0.180335	0.116238	0.234267
921	0.391344	-0.776483	0.17643	0.275494	-0.74952	-0.368545	0.121379
922	-0.144654	-0.263744	-0.0192628	-0.595798	0.329627	-0.146093	-0.565765
923	-1.06544	-0.472031	0.459682	0.768368	0.273583	-0.495503	0.204818
924	-0.187271	0.085126	0.242099	0.028846	-0.207761	0.435646	-0.552022
925	-0.427405	-0.0985805	0.893533	0.818204	0.137646	0.201121	-0.85682
926	1.65799	3.54019	6.60759	7.64115	2.76218	6.26621	1.48585
927	21.6833	25.3745	36.4738	35.4207	24.6718	21.9699	11.7115
928	54.9147	41.3876	52.6506	53.0451	52.4462	27.3702	18.6522
929	62.7551	42.0099	55.1057	55.4347	60.0547	33.1001	18.6291
930	64.7733	44.2812	61.505	63.0719	64.3975	40.6309	21.5333
931	67.9319	50.1309	66.7423	70.6306	69.9205	49.0764	23.2531
932	67.9635	54.624	66.3789	74.2931	70.9229	53.0285	24.5523
933	66.6206	57.1174	67.7229	73.9177	73.2529	57.2269	25.5742
934	66.04	57.0169	66.2624	75.3148	70.8565	58.7098	25.716
935	65.0491	54.2617	63.1007	71.8296	69.3151	56.3649	25.2993
936	64.8754	52.8089	63.9303	71.0318	68.1215	56.1707	24.568
937	61.686	51.968	59.7875	69.9941	68.2415	55.878	23.8784
938	60.2436	51.7489	58.5735	67.6248	67.3202	54.518	23.1496
939	58.3737	50.2913	57.2544	66.3793	64.5661	53.0552	23.0067
940	57.2464	47.2822	56.7107	65.1937	62.1733	52.8068	22.964
941	56.0753	46.299	54.9232	62.2568	62.215	51.3214	22.7235
942	54.7398	45.7504	51.3758	59.9031	61.0826	49.5194	21.418
943	51.9008	45.5814	49.6141	59.4833	60.7404	47.9297	19.7423
944	49.9576	44.2049	50.2266	59.2315	58.6258	46.5193	21.1696
945	47.7394	42.6011	48.0748	56.825	58.0459	46.7527	20.0618
946	48.8733	40.0728	47.2535	56.2354	57.6337	45.343	19.8071
947	48.0095	38.751	46.3604	53.8492	56.4413	43.4924	19.4139
948	47.1801	38.9175	44.6719	51.3806	53.93	42.8053	19.2323
949	44.7185	37.4565	43.214	49.5781	53.6256	40.7151	17.516
950	44.5386	37.7855	42.9772	49.5806	52.2483	39.9211	18.4583
951	42.5966	35.5884	40.7111	48.5712	52.3823	38.1437	18.0033
952	40.2662	34.6728	41.1218	47.3447	51.3019	36.3213	17.2995
953	39.1344	34.979	40.3916	47.0812	49.3841	35.9905	16.6992
954	38.498	31.7426	38.766	46.7006	48.1134	35.6956	15.8408
955	38.9086	32.8466	39.3198	46.19	48.429	34.6814	15.3986
956	37.7841	31.0625	36.9672	45.494	47.0155	33.582	14.3423
957	36.2966	28.6713	37.2294	44.3144	46.0059	32.3442	14.9725
958	36.17	29.7222	36.7636	42.9198	46.1614	31.6615	14.3139
959	35.1886	28.658	35.842	43.0685	44.8473	32.0523	13.7224
960	34.6739	26.6721	34.822	42.0088	43.6227	31.5635	12.9631
961	34.7657	25.8506	34.836	42.4126	42.7363	30.7219	12.2372
962	33.1593	24.1679	34.7038	41.8568	42.0693	30.3725	12.5999
963	32.8139	24.7406	33.6513	41.347	40.7211	29.7498	11.5776
964	32.5569	23.1662	32.2823	37.6055	41.8034	29.4732	10.6244
965	32.1836	24.3391	32.5704	35.2497	40.1479	27.4745	11.2536
966	30.1454	22.1286	31.0359	35.4676	39.4086	27.012	10.725
967	29.9909	23.5094	29.6184	34.9718	37.3159	26.1354	11.3852
968	30.1232	23.6492	28.4661	34.1469	37.6117	25.7439	10.5935
969	28.85	22.0803	28.1119	34.4861	38.0874	25.5397	9.56029
970	29.3172	21.7707	28.5826	34.073	36.889	23.5797	10.0418
971	28.5828	22.4339	26.8914	35.1149	36.2841	23.1546	9.46016
972	27.9194	21.2981	27.9035	34.6896	35.6585	21.6069	8.6135
973	27.6248	21.778	23.9831	32.5408	34.8663	20.4442	8.90505
974	26.6401	20.1643	25.1551	30.6875	34.9629	19.2203	8.32981
975	25.8217	19.4985	26.9176	30.7597	34.1441	20.015	7.95581
976	25.4402	18.8547	27.0822	31.5652	32.7279	20.1599	9.24911
977	24.4871	18.9793	26.8874	30.8869	31.7775	19.2397	8.76664
978	25.0095	17.2268	25.9339	32.0965	33.772	19.0429	8.7848
979	24.7575	18.9819	25.0238	32.0027	32.7648	18.6854	8.69154
980	25.4816	19.8357	23.6399	30.5156	32.3936	18.3291	7.57052
981	24.2023	18.2216	20.6309	28.8457	31.8793	17.0086	7.50916
982	23.045	17.4475	22.4478	30.1419	30.9396	16.4232	7.12191
983	22.7151	18.5908	22.9167	29.9966	31.7274	17.5896	6.46765
984	23.2679	18.8693	22.9416	28.5306	29.8438	16.9962	7.65199
985	23.6351	18.9677	22.2451	27.5892	28.961	15.9406	6.3474
986	23.4814	18.3191	23.0694	29.2402	29.0083	16.5908	6.61735
987	22.2234	18.0487	21.3734	27.1099	28.5687	15.7065	6.14126
988	21.853	18.2173	20.2251	27.1888	28.3866	15.5203	6.89859
989	22.6188	17.2164	19.5483	25.3745	28.7933	16.2601	7.64119
990	20.6162	17.1284	19.1591	25.5438	26.4104	15.9586	7.20339
991	21.5805	16.4988	19.7794	25.9822	24.6233	14.3721	7.43603
992	20.1204	17.1832	18.1145	25.6228	27.2868	13.1944	7.91164
993	20.2511	17.1116	18.6351	24.1712	25.9763	12.7886	6.65956
994	20.3089	17.1133	19.3298	25.6143	25.5101	14.326	6.62324
995	19.8262	17.1379	17.2035	24.7557	25.3587	13.6927	6.65809
996	19.829	17.1992	18.6315	21.5793	24.9771	14.3604	7.27259
997	19.2721	16.9128	20.4247	22.4333	24.7553	13.9247	6.74643
998	20.3536	16.4975	17.3668	23.6382	23.6905	13.1018	7.00019
999	20.1085	16.7985	18.8741	24.1184	25.142	12.8574	6.10739
1000	19.477	16.2349	18.0125	22.5532	24.5093	12.9741	5.94149
1001	18.7087	14.8873	18.2599	21.4784	24.9552	12.2087	6.46569
1002	18.2678	14.9684	19.0514	22.9152	22.7596	12.0726	6.0107
1003	17.4474	15.5764	18.5077	22.4206	22.5636	11.189	6.06616
1004	16.7425	14.3875	18.5243	22.8108	23.7207	10.1686	4.58978
1005	16.098	13.5893	17.2429	23.1728	22.9229	11.2249	5.11348
1006	16.743	15.6377	17.65	23.161	23.5835	11.0233	5.1979
1007	16.159	15.8421	18.0344	22.3843	24.3733	10.0354	5.2946
1008	16.4881	17.8439	15.8187	22.6136	23.6002	9.28943	5.674
1009	16.0521	16.6644	15.6913	21.5421	23.1531	8.90197	6.10739
1010	15.1141	15.8947	16.8296	20.7355	23.19	9.24589	6.18887
1011	14.6449	14.7368	16.3507	20.7439	22.4817	8.11497	5.03299
1012	13.438	13.1076	17.4464	19.3122	20.4216	8.45816	4.51469
1013	12.7013	13.6221	18.3623	19.1635	22.2262	9.03112	4.91029
1014	13.1569	12.4767	16.6195	18.8822	23.1594	9.06368	4.1397
1015	13.8499	13.2029	14.4576	18.2056	21.2166	8.4545	5.22441
1016	13.9872	12.8428	15.5876	18.0738	22.4949	8.52768	4.21529
1017	13.3528	13.0981	16.5914	18.5515	21.6848	8.94953	4.17357
1018	13.1967	11.2899	15.2829	17.6714	21.5775	8.29644	5.29361
1019	13.888	12.083	15.6476	18.3163	20.8127	8.69086	3.76226
1020	14.004	12.2236	15.3814	18.7175	20.8334	8.88331	3.70435
1021	13.729	11.4038	16.0683	18.9126	20.4029	8.97441	3.83
1022	13.563	11.9963	16.5604	19.5373	19.0169	8.29937	3.69944
1023	13.243	11.1946	14.7418	18.2272	18.0245	7.54494	3.92178
1024	11.9038	10.2886	15.4269	18.6444	18.8981	7.53982	3.91638
1025	11.8001	10.1946	15.504	18.8083	18.7824	5.77484	3.46139
1026	12.3685	11.0217	15.7198	18.1199	18.3504	6.49635	2.66332
1027	12.9459	9.30366	15.0898	16.2759	20.0675	6.95808	3.3004
1028	14.2826	10.7927	16.0157	17.5607	20.1553	7.69605	2.96763
1029	12.6357	10.0497	15.2995	17.8521	19.3989	7.33017	2.83609
1030	13.6315	8.87113	14.9199	17.328	19.2578	6.83844	2.61179
1031	13.1045	10.2054	15.4217	16.8938	18.6612	6.11035	3.1615
1032	14.4137	9.22992	13.181	16.9318	19.007	6.5011	3.40495
1033	13.9003	9.3429	12.8396	16.5462	18.4764	5.82314	3.18261
1034	14.8227	9.84227	12.8067	15.6183	18.3241	5.31018	2.99561
1035	13.7462	10.2692	13.002	14.1456	17.5451	6.64452	3.74018
1036	12.8713	10.4469	12.8938	14.8218	17.6413	5.72508	2.46994
1037	12.5115	10.5426	15.5434	15.993	18.0467	6.13779	2.77817
1038	12.387	9.9324	13.7751	16.2029	18.4116	7.68141	2.55044
1039	11.6272	10.9812	14.9191	16.5809	18.6735	6.5161	2.73302
1040	12.5513	11.0252	14.441	17.2997	18.4843	6.40232	2.06649
1041	12.5242	11.515	14.8298	16.3414	17.7287	7.08174	2.31092
1042	12.3193	10.0014	12.5011	17.1637	18.3941	7.4103	3.28273
1043	12.523	11.1192	14.9497	17.151	18.0857	5.82167	2.58626
1044	12.2222	10.0829	14.0864	17.0729	17.6985	5.59886	3.16347
1045	13.1967	10.4167	13.2051	16.4664	18.8532	5.55934	3.13304
1046	12.346	9.8565	13.6412	15.3861	19.8683	5.92668	2.69081
1047	12.055	9.66546	12.0971	14.7048	19.5114	5.75472	2.99659
1048	12.2312	10.0238	13.1062	15.7286	18.0618	4.32452	2.91217
1049	12.2316	9.3981	13.1622	14.5764	18.6354	4.92858	3.0545
1050	13.4434	9.4934	14.3136	12.9276	17.6158	4.10426	2.84591
1051	13.9982	9.78707	11.4553	13.1384	17.8396	4.98163	2.91315
1052	13.9822	9.78578	11.9211	14.1258	16.7879	4.46538	3.44225
1053	12.9758	9.97035	13.8728	14.9325	16.8893	3.23787	2.85032
1054	13.2032	10.0652	11.7017	13.7111	16.0538	4.42989	4.14756
1055	12.8516	10.1528	13.2914	14.7082	15.7469	3.61399	3.47759
1056	11.3219	9.89143	11.2149	14.4379	15.9194	3.20897	5.13214
1057	11.7256	9.81683	12.8361	13.3331	16.0204	3.49398	4.06019
1058	11.8587	9.66546	12.4806	12.1784	15.6146	3.8873	2.96616
1059	11.6092	9.63959	12.3729	11.1107	16.332	3.24263	3.21893
1060	13.0574	11.3339	10.1182	12.2189	16.929	2.90786	3.88693
1061	13.0488	10.1924	13.1333	12.6729	17.1786	2.35356	3.35194
1062	12.0919	9.53954	10.6637	12.1019	15.7175	3.00298	3.40937
1063	12.1321	9.45718	10.5	11.2205	14.859	2.99274	3.19537
1064	11.2781	9.22431	12.2087	11.8979	14.4567	3.07506	4.5407
1065	12.4927	10.2554	12.4823	13.5856	12.9837	3.26129	3.29059
1066	12.5341	11.0036	11.2386	12.8343	14.6737	2.87127	3.57281
1067	11.2949	9.39637	12.4031	15.3599	15.0919	3.77132	3.47857
1068	10.8835	11.18	9.91861	13.5227	15.2807	3.66668	2.96419
1069	10.522	11.2011	11.1777	12.727	15.3391	3.08933	3.64741
1070	11.0011	11.1532	10.3021	13.6329	14.9424	2.61735	3.49231
1071	10.1737	10.4037	9.67214	14.5899	14.2838	3.2386	4.10535
1072	10.615	10.2545	11.3077	13.668	14.151	4.42587	3.38924
1073	10.3175	11.6228	12.6202	14.2685	14.2981	4.35123	3.83196
1074	9.63443	11.2688	11.8326	13.1979	13.589	4.41196	3.3701
1075	8.99558	10.0881	9.71417	12.9787	14.2111	3.6879	3.91834
1076	8.39606	10.1635	10.6883	12.1492	13.7715	3.30483	3.44912
1077	9.07508	10.0337	11.0906	12.0939	14.1777	4.33769	3.37452
1078	9.01894	9.64261	8.75978	11.286	14.0461	3.28324	3.50115
1079	10.3913	11.1105	10.8073	11.1187	13.3752	3.99596	3.4933
1080	10.2319	9.23725	9.5176	9.32883	13.7424	3.58362	3.00002
1081	9.45372	9.62924	10.6694	10.7956	14.2003	3.0081	3.52863
1082	10.1598	9.9738	11.1431	11.7303	13.2535	2.08208	3.88791
1083	11.1678	8.98842	8.74489	11.7286	13.6463	2.53979	3.76325
1084	10.3532	9.94361	9.36743	11.6656	13.1407	2.27563	3.02211
1085	9.34021	9.76853	10.4549	10.625	13.0115	1.99537	4.177
1086	9.16851	10.3848	10.1397	11.552	12.6307	1.193	3.02211
1087	9.44675	10.2489	10.5674	13.5755	10.8822	2.80102	3.19193
1088	10.0168	10.054	8.53475	11.737	11.8711	2.71321	2.22404
1089	10.6597	9.58094	10.5766	11.5436	11.8051	2.12928	2.71437
1090	9.64058	9.58094	10.1865	11.506	12.422	2.09964	2.15827
1091	9.26358	8.8017	11.5144	11.1466	14.0056	1.98622	2.85769
1092	9.39348	9.02594	10.9404	11.552	13.7556	1.78755	1.52659
1093	8.07438	8.37391	11.978	10.8509	13.8665	2.86358	2.57154
1094	8.98206	8.37995	11.5104	10.5764	12.8056	1.71072	2.27803
1095	8.84601	7.57095	13.1434	11.0385	13.7265	1.69206	1.79998
1096	8.2887	7.82279	12.386	11.4824	13.3529	2.39636	2.03704
1097	8.90952	9.31832	11.3502	11.2391	13.1132	3.36556	2.05275
1098	9.03	8.56452	11.383	11.0997	12.2698	3.95499	2.17741
1099	8.35591	10.1597	11.9837	10.3775	12.0182	2.67662	2.60344
1100	8.84232	9.29158	11.1843	11.2053	12.0257	2.74687	2.37374
1101	9.14146	8.83577	11.4268	11.4524	11.4073	2.95615	2.37031
1102	8.54113	8.84008	12.3063	12.2096	10.8723	1.62657	2.57203
1103	7.96456	8.31397	10.3096	10.3657	10.4418	1.92841	2.01888
1104	7.9117	8.70898	11.788	10.4856	11.3687	1.30825	1.66255
1105	8.72307	7.78528	11.3611	10.8357	11.0424	1.53071	2.44835
1106	7.99243	8.63654	12.2183	11.6838	11.9009	0.635413	2.72173
1107	8.4395	8.1708	11.0249	10.8915	10.7995	0.0291601	2.80861
1108	8.1379	7.64038	10.6983	10.3986	10.8047	-0.178656	2.98235
1109	9.33406	8.09188	9.72073	9.53113	10.608	0.326616	2.64222
1110	8.7747	8.25748	10.1682	10.9063	10.782	1.3313	2.11263
1111	8.60178	7.23717	11.4881	11.0448	10.0682	0.285272	3.3809
1112	8.57883	8.01901	9.06667	10.0793	10.3349	0.145874	3.14678
1113	8.17396	6.85467	9.25667	9.62447	11.6346	1.05031	3.54336
1114	7.77811	5.58468	9.63711	9.51001	10.6338	0.810667	2.51755
1115	6.36395	5.97279	7.57687	9.64178	9.6075	0.549799	2.70455
1116	5.8886	5.42469	8.11404	8.77725	9.82969	-0.0571861	2.84591
1117	7.18638	7.08624	6.92806	8.17752	8.49775	1.22886	3.6376
1118	7.94079	7.26132	8.86135	8.36166	8.99142	0.43089	2.14649
1119	7.66296	8.09275	7.91615	8.0618	10.197	0.310151	2.95487
1120	7.96948	7.53688	7.94986	8.00732	8.6639	-0.567946	2.78848
1121	7.43922	7.14834	7.94811	7.44222	9.48309	-1.18517	2.29963
1122	7.5056	7.78312	8.43669	8.86509	7.95003	-0.440256	2.253
1123	6.95076	7.48427	7.70601	7.88864	8.98585	-1.17347	2.85032
1124	6.33977	8.23376	7.47661	8.87016	9.30264	-0.420865	2.21226
1125	7.31342	8.73011	7.00511	8.86425	10.071	0.228561	2.44589
1126	7.19089	7.60933	7.50463	8.02041	9.7816	0.872865	2.41104
1127	7.50601	7.50799	6.71836	8.3832	9.68461	2.43515	1.89765
1128	5.80008	6.66018	8.52162	10.0962	8.774	0.887866	1.72733
1129	6.79012	6.30614	9.45368	10.1131	9.35193	0.894086	2.60688
1130	7.6814	7.17939	7.68456	8.62858	8.06848	1.9178	2.41104
1131	6.98231	6.28802	8.07814	8.92591	9.83128	2.39161	1.29885
1132	6.74463	6.99051	9.3381	8.48752	10.4661	2.43698	1.92906
1133	6.6467	6.08276	9.22559	8.31943	9.22712	1.08946	1.37689
1134	6.69997	6.90512	8.87317	8.86594	9.49263	1.79377	2.16269
1135	6.85323	6.47389	9.09644	9.49819	9.51132	1.7184	2.70995
1136	7.8363	6.35185	10.5381	8.72234	10.1183	1.62108	2.61571
1137	8.04488	6.38074	10.1734	10.1634	9.93622	2.05793	2.77572
1138	7.61829	5.91242	10.1165	9.36304	10.2677	3.33922	1.59678
1139	7.10565	5.83825	9.20895	9.67726	8.98506	3.19287	1.62083
1140	7.31096	6.44284	8.87404	9.84282	8.92901	3.19104	2.3438
1141	8.05349	6.10001	10.3744	9.67472	10.1314	3.2269	2.59804
1142	7.03886	6.28156	10.2653	10.636	9.8921	3.33117	2.25202
1143	5.86647	5.84601	9.03077	9.39429	9.65401	2.96383	1.47653
1144	6.85855	6.4713	8.63545	9.48594	9.97596	2.04	2.57399
1145	5.96973	5.0659	8.78999	8.17583	9.67826	2.51564	2.07778
1146	6.05292	5.69206	8.15431	8.13149	9.20764	1.89182	1.71801
1147	7.43635	6.95946	7.38643	8.54876	7.59071	2.05061	2.24171
1148	6.6467	6.51442	8.20422	8.36884	8.60587	2.27343	1.46867
1149	6.04349	7.09702	8.98305	7.41435	8.97631	0.227464	2.05275
1150	6.16684	5.47342	7.63028	7.14658	8.43575	1.17874	2.29717
1151	6.45615	6.07413	7.75986	7.08028	7.92022	2.88517	1.9644
1152	5.8972	6.94523	8.8145	8.17668	7.62768	2.27819	2.28932
1153	5.19442	7.38423	8.77598	7.48235	8.76843	1.32984	2.25644
1154	5.21204	6.53555	8.49273	7.80544	9.4346	1.26435	2.32466
1155	5.30834	5.31343	7.34352	8.29282	9.89567	1.40155	1.59481
1156	6.04677	5.64548	9.74612	8.38236	10.5952	0.513943	2.20588
1157	5.35055	5.71879	8.29003	8.50357	10.4581	0.479185	2.039
1158	6.29059	6.29837	8.66872	9.01545	10.2701	1.16813	3.10113
1159	5.59683	5.85894	8.56409	8.05082	9.70926	1.67559	1.83482
1160	6.25085	6.4161	8.20685	7.74251	10.1318	1.41546	2.26822
1161	7.06959	5.44496	8.00897	7.35733	10.3846	1.028	1.71506
1162	6.70366	6.35745	6.88515	8.01703	9.42586	1.77145	1.92464
1163	7.39414	6.1565	7.53177	6.71579	9.56179	1.1191	3.05254
1164	7.45069	7.92629	8.52556	6.61147	10.3639	1.82048	2.18183
1165	7.11016	6.46742	7.52521	7.27582	10.288	0.519431	2.20588
1166	7.14172	6.17892	8.87973	7.25639	10.6779	1.43887	3.28273
1167	5.97957	6.28501	8.97167	7.30961	10.3039	1.23728	2.71339
1168	6.48565	5.99866	7.68631	5.87026	9.96444	0.425401	2.25202
1169	5.89556	6.25999	8.19371	5.48129	10.3969	1.118	2.65203
1170	7.02534	6.66147	8.78692	5.72075	9.36663	1.14068	2.84051
1171	7.96374	6.68606	8.08952	7.08196	9.77047	1.43814	1.89372
1172	7.76746	5.32939	7.29843	7.15334	9.47475	1.84755	2.67167
1173	7.21302	5.85894	7.6294	6.94344	9.67468	0.938356	2.24417
1174	6.67456	6.07974	7.70339	7.63946	9.69137	1.29472	2.48221
1175	7.43717	5.04132	8.33906	6.70397	9.96364	1.72608	2.99119
1176	8.00513	5.2302	8.61662	7.51867	10.4172	1.62583	3.429
1177	7.78835	5.07237	8.50936	6.77703	9.75219	0.539188	3.46385
1178	8.09241	5.39537	6.83612	6.86699	8.7422	0.885305	2.97843
1179	8.57432	4.40913	5.89049	7.64199	9.34636	0.553823	2.11508
1180	9.19391	4.46476	7.03663	9.17678	8.99738	1.00202	2.66676
1181	7.97112	5.06461	7.37898	8.20286	8.42939	0.146606	2.72909
1182	7.7818	5.69464	6.01964	8.60324	8.01363	0.99836	2.05127
1183	7.96661	5.12024	6.13959	8.87861	9.17147	1.83109	2.18772
1184	8.13995	5.13102	7.60007	8.69405	7.94248	2.03195	2.42086
1185	7.74697	5.61141	5.75084	8.18512	7.8447	2.50466	2.46552
1186	6.84749	5.01588	7.62546	8.93225	7.86179	0.889329	1.87949
1187	7.36915	6.72142	7.94636	8.51835	7.94009	1.05836	1.92023
1188	7.01837	6.40877	8.27164	8.39756	6.82835	1.23947	2.11164
1189	6.291	5.22675	7.89295	7.67704	7.21271	1.08873	1.89765
1190	7.14827	6.1289	7.44815	6.34371	7.2616	1.8717	2.12293
1191	6.1484	6.26043	6.90661	7.29271	8.96836	1.89182	2.35656
1192	7.78344	6.81543	5.95134	6.42691	8.78831	0.999823	3.0069
1193	6.30535	7.19491	5.31567	7.87512	9.44176	-0.09231	2.3811
1194	5.64682	6.84604	6.14178	8.30929	8.34194	-0.263539	1.13197
1195	5.16328	6.2311	6.90748	7.14912	9.02679	0.174778	2.22502
1196	4.91044	6.3691	7.87325	7.28596	9.13173	-0.037063	1.55064
1197	4.94732	7.26219	7.34352	7.50177	8.90199	-0.134385	2.49154
1198	4.62441	5.43633	8.42618	8.65603	8.56493	0.614558	2.36981
1199	5.27392	5.89732	7.38643	9.55393	7.74096	0.100871	2.62651
1200	5.30138	6.62525	7.36235	10.0468	7.7819	-0.719783	1.67874
1201	5.32186	6.13407	6.49858	10.9629	7.20119	-0.568678	3.07512
1202	4.72563	5.52387	8.03436	8.30929	7.19125	-1.53715	2.94358
1203	4.32158	5.81841	7.06509	8.58635	7.0251	-1.1098	1.95753
1204	6.21683	5.41779	7.17847	7.51106	7.75169	-0.13841	2.2422
1205	5.50914	5.20131	8.59561	7.1432	7.55017	0.0368435	2.3654
1206	5.61773	5.5394	9.02902	6.53461	7.50446	-0.304151	1.95409
1207	4.66908	4.92273	7.23583	6.99538	7.65192	-0.865401	1.86133
1208	5.49356	5.55449	6.40884	6.58656	6.85459	-0.142801	2.91609
1209	5.37514	4.47554	7.31988	5.8804	8.12254	-0.197316	2.5254
1210	4.68137	4.64545	6.36681	5.57969	9.52642	-0.627949	3.05107
1211	4.32568	4.67175	6.3007	6.2018	9.18022	0.127214	2.49841
1212	4.47648	3.95547	6.67589	5.85084	9.20049	-0.520382	2.9799
1213	5.47389	3.82739	5.99075	6.9616	8.22469	-0.145362	4.42143
1214	4.28593	4.98914	6.02621	6.17097	7.31963	-1.067	3.82803
1215	3.55201	4.18704	6.98322	7.37	8.24257	-1.10102	2.86848
1216	3.0365	4.38886	4.87525	8.54876	7.66146	-0.766615	2.28638
1217	3.10575	3.72821	6.79584	7.97691	8.10505	-1.28725	2.32809
1218	2.50993	3.88173	6.64612	7.91229	7.62728	-0.898696	2.43902
1219	2.7435	4.92834	5.32049	8.71896	8.65197	-1.04578	1.56046
1220	4.09784	4.77309	6.77921	8.26241	7.36574	-1.01651	2.29619
1221	4.25028	4.31728	5.02147	9.08345	7.70797	-0.747956	2.57154
1222	4.18144	4.41991	5.46846	9.12315	7.61098	-0.241952	3.00837
1223	2.79063	4.18273	6.20351	7.87512	8.13446	-0.589167	2.99806
1224	3.38932	3.70923	5.50786	6.56966	8.58281	-0.371838	2.21472
1225	4.02613	3.96927	7.03225	6.75507	8.02038	-0.777226	2.23091
1226	4.10358	4.24397	8.46296	7.93847	8.27079	-1.39628	3.12027
1227	4.16382	4.0111	5.55076	6.45985	7.95758	-1.42958	1.36806
1228	4.62113	4.47036	7.16622	5.79889	7.61695	-1.33774	1.73862
1229	4.83176	5.75631	7.0038	4.72234	6.94124	-1.45153	2.00514
1230	5.65256	5.94519	6.71354	5.95938	6.36172	-0.964919	1.9325
1231	5.39358	3.76745	6.65882	4.87016	5.80366	-1.52617	1.99679
1232	5.53167	3.33449	8.29966	5.14806	6.62723	-1.65313	2.23042
1233	5.14197	4.73256	8.04749	4.29493	6.09859	-1.2342	1.81814
1234	6.098	4.30175	5.65671	5.49649	5.75	-0.915892	1.76954
1235	5.4239	4.73601	6.69953	6.07426	5.51112	-1.18444	1.10301
1236	4.7703	4.33754	5.59235	6.18111	5.9873	-0.952479	0.916994
1237	4.88053	3.12836	5.45357	7.04818	6.69639	-1.09956	-0.0896724
1238	4.88299	2.61821	6.75075	7.06254	6.66579	-1.35567	1.17958
1239	4.29822	4.29916	7.44947	7.85189	6.43803	-1.11054	1.92464
1240	4.92233	4.46691	6.70478	7.4456	6.65943	-1.89058	1.81912
1241	6.24183	5.01458	7.28442	6.93921	7.40668	-2.04242	1.37051
1242	7.59043	4.97793	8.39072	7.34128	6.73296	-2.05339	1.76611
1243	7.12491	4.03352	7.63947	6.98609	5.77624	-1.69593	1.3445
1244	6.29264	4.72005	5.71012	6.53757	6.43446	-0.679903	1.20461
1245	6.13856	3.96323	5.78542	6.33104	6.01512	-1.24591	1.43284
1246	5.69928	4.5109	7.62371	5.03825	6.20829	-0.786738	1.41125
1247	5.53126	3.67818	7.57117	5.75285	6.19756	-1.30591	0.93859
1248	5.31449	2.73119	7.8982	6.0316	5.62957	-0.321347	0.646063
1249	5.77017	3.52423	6.39351	6.17604	5.85295	-1.03334	0.773185
1250	5.05632	3.31206	6.90004	5.12145	5.01229	0.038307	0.547409
1251	3.45571	3.30258	8.58291	4.58381	6.34343	-0.0432829	1.46867
1252	2.48862	3.54019	7.55892	4.68897	5.5135	-0.681733	1.00534
1253	3.31024	3.97487	6.82955	5.75708	6.74727	-0.320249	0.908651
1254	4.06014	4.28235	7.43239	5.09442	6.39153	-0.751615	1.00191
1255	4.47197	4.40913	6.55418	5.55182	5.75199	-0.363057	1.18105
1256	3.55529	4.07621	8.72169	4.63449	6.31482	-1.07468	0.968039
1257	3.78231	4.61957	9.3543	6.01639	5.22692	-1.4358	1.69641
1258	4.2806	4.45527	8.42049	7.41097	5.79134	-1.3875	1.06669
1259	4.91331	4.22672	7.48143	6.63259	6.19597	-2.064	0.901288
1260	3.90852	3.40564	9.46944	6.36314	6.56761	-1.35567	0.337339
1261	4.13144	3.62471	8.17576	6.21532	7.01	-1.73106	-0.770927
1262	4.65351	3.39874	7.78044	5.29672	6.97502	-1.26457	1.1467
1263	5.25261	2.56344	7.05458	6.53925	6.07713	-1.63996	0.851225
1264	5.25302	3.66525	7.15308	7.06592	5.3418	-1.49983	0.295619
1265	4.96781	3.16027	7.57511	6.29345	6.37245	-1.00919	1.03479
1266	5.53413	3.49577	7.9236	7.22809	6.57079	-1.76765	1.07111
1267	6.02792	3.28403	7.83297	7.27497	5.71383	-1.50275	1.6866
1268	5.97055	2.49832	6.43992	7.74758	5.18956	-1.81118	1.01074
1269	6.09923	2.81485	7.90871	8.02886	5.51072	-2.36	1.14572
1270	5.79025	2.65314	7.51295	7.41097	5.77385	-2.75697	0.942026
1271	5.51938	2.9895	7.30106	7.89624	5.99843	-2.12401	1.3337
1272	4.74284	2.9011	7.96694	7.54021	6.60219	-1.26164	1.07896
1273	4.23963	3.52768	8.49097	6.18998	7.69803	-1.9879	0.680911
1274	4.44411	2.76957	7.44071	5.55689	7.89796	-2.07571	0.619559
1275	4.36912	2.72386	7.35272	7.08365	8.52836	-2.14962	0.659315
1276	3.50488	2.84029	7.19818	5.90532	8.03191	-2.48147	0.408017
1277	3.0115	2.66392	6.78184	5.57462	7.23418	-1.55105	0.769749
1278	4.02654	2.06191	7.67055	6.07003	7.5768	-1.67032	0.24801
1279	3.37047	2.28184	9.10563	5.79973	6.87883	-0.11975	0.166534
1280	4.87643	2.39698	8.61268	7.00637	7.06287	0.183193	-0.05826
1281	5.19852	1.55521	7.82509	6.98187	7.38204	-0.587337	0.0772056
1282	6.0312	1.70097	6.94382	5.89645	7.91744	-0.153045	0.159663
1283	5.48209	1.73762	6.71354	5.88462	6.88837	0.371618	-0.15446
1284	4.15111	1.69191	6.62073	4.96012	7.00483	0.0313554	-0.133846
1285	4.14292	1.96575	7.13163	5.29926	6.65108	0.637974	-0.247225
1286	3.78599	1.43317	6.77527	6.42438	6.69162	0.306858	0.626921
1287	3.44915	1.45818	6.16105	5.66374	6.40027	-0.194389	0.817358
1288	3.88885	-0.73336	6.41146	5.47664	7.29658	-0.179388	0.0590454
1289	3.81673	0.220534	5.47678	5.32037	6.21187	1.12605	1.31014
1290	3.38072	0.919999	6.77921	4.34476	7.02789	0.655902	0.641646
1291	5.0928	0.858763	6.43861	5.07246	6.86731	0.61529	1.00191
1292	4.64941	0.265814	6.51653	5.7537	6.37046	0.81835	-0.292871
1293	4.89487	-0.989945	5.52931	4.88705	7.60224	-0.11097	-0.0219395
1294	5.08255	0.216653	5.51443	6.06074	8.44648	-0.476112	0.0870219
1295	5.24646	0.247702	6.64612	6.57473	7.98064	0.444793	-0.394961
1296	4.35191	-0.37069	5.3183	6.12536	8.31849	1.42021	0.72214
1297	4.60679	-0.0472635	5.66328	6.18998	7.81807	1.74804	0.421269
1298	5.36653	1.42584	6.24072	7.40083	5.65024	0.696148	0.372678
1299	5.40013	-0.729479	5.4921	7.20867	6.78463	-0.490747	-0.19029
1300	5.55708	1.68717	6.11333	8.2641	7.02312	0.00574422	-0.181455
1301	5.28375	2.5518	5.4365	7.97944	6.51395	-1.05748	0.100765
1302	4.22282	2.93948	6.41715	7.37423	7.31208	-1.28103	0.862514
1303	4.24126	0.477982	6.69165	5.85759	8.36102	-1.56129	0.509616
1304	4.68465	2.40259	6.47713	5.44285	7.58435	-0.707344	0.960186
1305	3.48112	3.10464	6.41453	6.29683	8.76565	0.232952	0.733429
1306	2.65458	1.81007	6.9517	5.76932	8.54386	0.282711	0.515506
1307	4.88135	3.91191	5.73551	4.80385	8.52637	0.73676	0.948407
1308	4.95183	3.73036	7.20824	5.39344	7.67736	0.508455	0.704961
1309	4.28388	2.26071	5.39053	5.45046	6.696	0.529675	1.19676
1310	4.78423	4.14909	5.93252	4.5686	7.20476	0.132702	1.42254
1311	3.93352	3.8938	5.78717	5.16495	6.21147	1.1502	1.35775
1312	3.32868	3.11542	7.04889	4.07911	5.68243	0.311615	0.977856
1313	5.04444	2.15506	6.3007	3.91989	5.52066	0.198926	0.443846
1314	5.41857	3.532	3.95282	2.86192	6.39908	-1.35421	1.06424
1315	5.25179	3.8744	6.16893	2.94005	6.69361	-0.922843	0.377586
1316	4.85594	3.86362	6.38432	4.9977	6.1439	-0.65978	0.769749
1317	5.65912	3.15941	6.28231	5.01544	5.31119	-1.31982	0.539065
1318	4.76702	4.24397	5.64095	4.11881	4.81911	-1.87887	0.975893
1319	5.58331	4.32202	5.80425	3.48065	5.38035	-0.806861	1.13246
1320	5.53085	4.78819	4.58543	3.9372	4.34811	-0.870158	0.0428484
1321	4.93216	4.16936	4.19098	3.02452	4.80958	-1.33555	0.102728
1322	4.11505	4.4143	3.73305	3.37971	5.53258	-0.631974	0.11009
1323	3.41801	4.96844	3.74531	3.13222	5.04409	-1.27884	0.399673
1324	4.38715	4.13184	5.35201	3.83162	5.94278	-1.23603	0.652444
1325	3.79747	3.41254	4.04651	4.5099	4.93597	-1.05456	-0.290417
1326	4.06301	3.66007	4.87306	4.38066	4.99162	-0.114262	-0.996703
1327	4.45189	2.74973	4.5329	2.71325	4.55122	-1.33409	-1.1572
1328	4.54778	3.43238	3.88409	3.93551	4.97175	-1.28177	-1.3923
1329	3.92286	2.61519	5.43387	4.81821	4.29206	-0.616241	-1.04186
1330	3.14632	3.28878	5.25394	4.71811	5.12597	-0.329762	-0.780253
1331	3.44546	1.49009	6.26174	4.5686	4.31353	-1.06444	-1.40114
1332	2.92258	3.71656	6.59227	4.21341	4.37275	-0.754176	-0.331155
1333	3.60036	4.58637	4.52721	4.3304	5.11205	-1.09956	-0.281091
1334	3.52086	3.74977	5.3056	4.39756	5.06833	-0.85845	0.402127
1335	3.97409	4.15513	5.50523	4.60577	5.07509	-1.76362	0.0325412
1336	4.62154	3.59194	5.99819	4.85326	5.18479	-1.0209	1.01761
1337	4.20971	4.55532	5.33625	5.51592	4.40932	-0.589898	0.822757
1338	2.63327	3.69198	6.77177	4.35532	4.34016	-0.554043	0.655879
1339	2.83202	4.94214	4.70626	3.9106	4.90179	-1.2064	0.408017
1340	2.91233	3.32155	6.70303	4.05757	4.76029	-0.96126	0.320651
1341	3.58889	4.16591	5.57616	2.93498	5.81241	-0.767347	-0.100961
1342	3.0238	4.30693	5.88086	2.89697	5.81519	-0.458915	0.663242
1343	2.76973	4.55877	5.00352	3.5837	7.28426	-1.618	1.54573
1344	3.25614	4.70927	5.08145	2.84756	6.56602	-1.3875	0.315252
1345	3.93352	4.71013	3.99967	2.9012	6.38636	-2.27658	0.582748
1346	3.711	4.93955	4.17478	2.74324	6.69878	-2.45878	1.37934
1347	4.30437	5.56872	5.03329	2.13549	6.34622	-2.0812	-0.35864
1348	4.38838	2.97786	5.32399	1.40991	6.03778	-2.57806	0.299055
1349	4.63466	2.38534	4.20849	2.02061	6.51753	-2.52171	1.00191
1350	5.18008	2.56042	5.21454	2.5781	6.15901	-3.41408	0.880674
1351	3.63683	2.35256	4.53552	1.91038	7.29221	-2.73355	-0.222193
1352	3.8196	3.16803	3.67964	2.84334	6.74687	-1.21481	0.743245
1353	2.63122	3.49577	2.24456	2.03962	6.84942	-1.86424	0.514524
1354	3.93843	2.39483	3.8101	2.98271	7.27154	-1.6974	0.813923
1355	5.18254	1.38013	2.0029	3.03973	6.98814	-2.12547	0.334394
1356	3.02339	2.29349	3.26943	3.67282	5.61486	-2.32341	0.674531
1357	3.28073	3.22366	3.55706	3.97015	5.58346	-1.61325	-0.243789
1358	2.66032	2.42587	3.72473	4.40262	5.44951	-1.27774	0.0938934
1359	2.28946	3.58116	3.22521	3.41941	5.44474	-0.719783	-0.0150681
1360	2.50009	2.05113	4.35297	4.18765	5.58505	-1.19944	0.0880036
1361	2.91356	3.16803	2.92795	4.2907	5.29688	-2.11706	1.08485
1362	2.37921	3.06454	4.64147	3.32945	5.73053	-2.26816	0.631339
1363	2.9361	2.99252	5.02892	3.89032	5.55087	-1.88216	0.406544
1364	3.64872	2.40345	3.96771	4.35237	6.71746	-1.17274	-0.414103
1365	4.45927	2.1046	2.61318	5.3246	5.49681	-2.0362	0.132177
1366	4.21955	3.071	2.76772	5.62488	5.08304	-0.86467	-0.0523702
1367	4.76169	2.24131	3.12977	4.66025	6.20988	-1.22981	-0.589815
1368	4.7621	1.69709	2.93364	4.94998	6.04493	-1.02565	-0.584907
1369	4.28552	3.0171	3.18406	4.30422	6.25798	-1.70142	0.385439
1370	3.36351	1.96143	4.31269	3.74588	7.61456	-1.19396	0.555262
1371	3.56225	2.83037	4.33151	3.45784	7.41185	-1.34177	0.165062
1372	3.49259	1.50605	4.26366	3.05746	7.80694	-0.664537	-0.0577692
1373	4.40108	2.30297	3.63499	1.86857	8.63011	0.476624	0.815886
1374	4.53057	2.4483	2.57465	2.56966	8.37175	-0.701124	-0.359622
1375	5.8636	2.29909	3.846	2.82898	7.12567	-0.683928	-0.137282
1376	5.69436	1.47629	3.26899	2.33357	6.40385	-1.10724	-0.0445172
1377	4.9633	2.81873	2.73576	2.42099	6.82398	-1.34726	0.124815
1378	4.72809	2.59923	3.13722	3.0676	7.42894	-1.80167	0.664223
1379	4.25848	2.36335	2.95334	3.29355	7.18052	-0.901989	0.478204
1380	3.64708	2.22837	2.86403	5.10287	6.95912	-0.4044	0.715268
1381	4.57032	1.44826	3.53736	4.98926	6.70434	0.239903	0.549863
1382	3.6524	1.75918	2.93364	4.37644	7.53626	-0.00193913	0.209726
1383	4.92765	2.98088	2.66002	5.19029	7.02312	-0.750151	-0.204524
1384	5.78369	3.16544	3.66301	3.73321	7.34706	-0.177193	0.472314
1385	4.17611	2.15506	4.57405	3.18248	6.67056	-0.788934	0.701526
1386	3.35162	2.7217	3.53648	2.91978	5.51629	-1.33701	0.41587
1387	3.53603	2.68332	2.76466	3.00298	6.51435	-1.98644	0.260771
1388	3.87533	1.01703	2.54445	3.73828	6.73574	-1.88582	-0.131883
1389	3.30368	2.65098	3.82411	2.86445	5.89627	-1.85326	0.00652787
1390	2.83652	1.34692	2.93627	3.4967	6.81603	-1.77862	0.100765
1391	3.1914	2.37887	3.48482	3.84429	6.90308	-1.68898	0.549863
1392	2.9947	2.05803	2.63813	4.20961	6.04692	-0.824058	-0.600123
1393	2.70089	1.53667	4.30218	4.6083	5.78379	-1.32713	0.0158534
1394	2.41117	1.10371	4.47117	3.61327	6.00916	-2.16535	0.0124177
1395	1.90099	1.34822	1.6531	2.86276	7.17972	-0.971139	-0.518156
1396	1.95467	0.928192	3.42747	1.30601	6.59345	-1.47019	-0.468093
1397	2.01409	3.20857	3.44061	3.03212	6.68328	-1.81118	-0.735588
1398	2.33126	1.81438	3.63017	2.98186	6.16457	-1.06773	0.0192891
1399	2.5927	2.93387	2.07689	1.7292	5.63831	-1.7285	-0.194217
1400	2.49681	3.22539	2.99844	1.90278	5.61287	-1.26457	-0.480854
1401	2.75457	2.63201	2.40698	1.81071	4.41886	-1.74423	-0.012614
1402	2.12104	2.08261	2.25025	1.69372	5.46859	-1.74021	-0.937805
1403	2.51402	2.33316	4.26847	2.62414	5.47336	-1.17274	-0.738042
1404	2.39724	2.55826	3.17749	1.70808	4.50153	-1.73581	-0.636934
1405	3.01478	2.98562	3.33028	0.755275	4.33817	-1.4669	-0.00819665
1406	3.00331	2.06105	2.89906	0.378123	4.43754	-1.87046	0.72214
1407	2.40092	1.76177	3.39945	0.863395	4.07425	-1.56276	0.507653
1408	2.04523	2.65012	3.29657	0.487932	3.52175	-1.27006	-0.339008
1409	1.25312	2.01318	2.63726	0.142878	4.03847	-0.880036	-0.399378
1410	1.73748	1.8851	3.98566	1.11764	4.74757	-0.835034	-0.137282
1411	1.70716	1.7898	1.85011	1.38076	3.3572	-1.31835	0.310344
1412	2.07105	2.33661	2.88461	1.03064	3.74394	-1.04431	-0.385635
1413	1.65266	2.97786	1.83391	1.132	3.30076	-0.907477	0.0929118
1414	1.53997	2.10762	2.49673	1.53196	3.52493	-1.96302	1.11627
1415	1.35639	1.81309	1.82953	0.628995	3.37827	-1.72228	0.466915
1416	2.14563	0.901887	2.74233	1.86857	3.30076	-2.53671	0.161626
1417	1.935	0.87515	2.30541	0.338845	4.00111	-2.40683	0.532684
1418	2.01901	2.48452	2.51161	1.55688	3.75905	-2.91649	0.316234
1419	2.04564	2.23268	4.15333	2.1186	3.79283	-2.77709	-0.499014
1420	3.7946	2.55913	4.36522	2.53672	3.20974	-3.19931	0.190094
1421	2.62794	3.55744	4.54866	3.12799	4.13188	-2.09766	-0.396924
1422	2.68695	3.39443	4.97332	2.85516	4.15414	-2.465	-0.131883
1423	2.54312	2.43536	4.57799	1.73004	3.37946	-3.1437	-0.243789
1424	3.26967	0.446933	4.83191	2.31752	4.53214	-3.45286	-0.101943
1425	3.53562	2.67168	4.0325	2.19588	3.27651	-3.40237	0.565569

## Sheet: Fig 2E VGLUT-pH 10s pulses
Source Data	Figure 2E	AWC VGLUT-PH Data: individual dF/F(%) traces - 10 sec stimulation
		Six trials per animal: Read from left to right; Trial 1 signifies a new animal
		Acquisition Rate: 5 Frames/sec
		Stimulus ON:	Frame 25
		Stimulus OFF:	Frame 75
Frame / Trial #	1	2	3	4	5	6	1	2	3	4	5	6	1	2	3	4	5	6	1	2	3	4	5	6	1	2	3	4	5	6	1	2	3	4	5	6	1	2	3	4	5	6	1	2	3	4	5	6	1
1	2.55393	1.49648	1.08871	0.835613	0.981521	1.383	0.819574	0.746315	0.164139	0.900805	0.947877	0.12174	0.430368	1.12842	0.364875	0.453565	0.441668	0.631191	1.08998	0.870991	0.204052	0.857135	0.762647	0.147172	1.10228	1.67857	0.71987	0.955489	1.56111	1.08863	1.77903	0.806433	1.68997	0.824787	0.566678	1.02665	0.394952	0.124519	0.415478	0.609921	0.574826	0.511786	0.839382	1.53976	0.968866	1.20303	1.25299	1.76469	0.951195
2	1.83222	1.75419	1.043	0.358505	1.50213	1.02662	1.52722	0.892882	0.94064	0.707194	1.14863	1.17602	0.722141	0.876211	0.214789	0.626482	0.754021	0.377468	1.2115	0.955259	0.60744	1.17397	0.9918	-0.00625269	1.17451	1.52419	0.708137	1.05665	1.45514	0.841044	1.23693	1.74172	1.28502	1.13142	0.903967	0.774597	0.370786	0.290892	0.12653	0.307371	0.0993515	-0.102073	0.741287	1.2783	0.576518	1.16304	1.71986	1.72885	0.809624
3	2.2089	1.4577	1.01512	0.906527	1.11741	1.2735	1.2522	1.24046	0.550673	1.11096	0.776376	0.721934	0.932629	0.967905	0.0972522	0.305579	1.01669	0.665332	0.815567	1.06178	0.295923	1.16551	0.683493	0.186182	1.08328	1.65243	0.768079	0.949352	1.8993	0.379132	1.24817	1.31833	1.14184	0.797744	0.899255	1.0433	-0.165728	0.0558056	0.0648208	0.323535	0.128933	0.148627	1.36083	1.47219	0.982518	0.905462	1.11582	1.3839	1.15917
4	1.99367	1.66388	1.32161	0.763835	1.18514	1.42754	1.51072	0.362167	0.854174	1.0463	0.751792	0.63081	0.86712	1.13511	0.439108	0.389066	0.795015	0.14593	0.765112	0.498869	0.362418	0.966679	0.833556	-0.318406	0.960943	1.30322	0.666607	0.766335	1.51477	0.71331	1.17705	1.68167	1.25999	0.422292	0.622516	0.853264	0.740558	-0.154718	0.197896	0.251837	0.271596	0.348292	1.24077	1.10462	0.788147	0.686186	1.30003	1.28578	0.814146
5	1.96575	1.23556	1.03758	0.853991	0.651163	1.41049	1.06107	0.858268	0.479116	0.965941	0.759464	0.724443	1.20147	0.983776	0.634488	0.266755	0.698106	0.850727	0.947906	1.11461	0.605579	0.705337	0.896471	-0.0340722	1.44633	1.48787	0.545364	0.902716	1.54859	0.811122	1.43076	1.29274	1.51819	0.465589	1.16463	0.801538	0.462363	0.277712	0.160456	0.047004	0.60554	0.400272	1.28629	1.20953	0.370917	1.23382	1.4341	1.43496	0.692128
6	1.94873	1.48504	1.22066	0.850796	1.20686	1.52253	0.903639	0.998547	0.843425	0.840978	1.01807	0.769256	0.677419	0.488803	0.97114	0.401357	0.552181	0.917516	0.931123	0.879789	0.503845	0.71599	0.688298	0.491376	0.949672	1.57317	0.42637	0.679951	1.23843	0.74773	0.855981	1.17783	1.26937	1.04995	0.732576	1.07944	0.285343	-0.413934	0.119805	0.478395	0.364887	0.145413	0.981657	1.27131	1.02666	0.510492	1.38619	1.52384	1.02168
7	1.93744	1.24328	1.31781	0.707039	1.31021	1.4683	1.75959	1.27006	0.922438	0.694907	0.677776	0.464484	0.754587	0.577125	0.732401	0.2566	0.890832	0.0354701	0.674624	1.13291	0.493964	0.961458	0.872108	0.36659	0.98735	2.60262	0.572974	1.24114	1.47644	0.954361	1.37714	0.931907	1.62821	0.862866	0.442913	1.16045	0.353719	-0.0136683	0.616367	0.3419	0.459034	0.189211	0.494902	-0.833947	1.00756	1.23123	1.23428	0.833118	1.03258
8	1.95558	1.25476	0.865424	0.527353	1.32504	0.815957	1.23503	1.12464	0.663854	0.908947	1.25339	0.688784	0.783871	0.40507	0.837884	0.480674	1.18832	0.770995	0.534995	0.553549	0.516836	0.641157	1.23338	0.480114	1.2472	2.00459	0.567694	0.754445	1.34909	1.10277	1.63266	1.1667	1.12191	1.23876	0.827469	0.984574	0.273129	0.162861	0.270713	0.700729	0.311109	0.156855	1.51213	0.597499	0.877492	1.45095	1.06049	0.903265	1.12967
9	1.62347	1.29249	1.45476	1.08158	1.19929	1.23407	0.76527	0.663851	0.790635	1.37148	0.397245	0.500108	0.921454	1.19049	0.365717	0.482748	0.517025	0.577702	0.557458	0.574174	0.507791	0.623541	0.822093	0.169412	1.21166	1.35131	0.425206	0.92341	1.1733	1.62054	1.76333	1.9104	0.905517	0.625633	0.684508	0.919695	0.376007	0.322572	0.423342	0.523428	-0.00903196	0.414763	1.82979	1.25952	0.949114	1.45857	1.75491	1.6168	0.740671
10	1.52234	1.52293	0.792886	0.994432	1.50497	1.06298	0.805381	0.918839	0.701434	1.37157	1.04363	0.252138	0.390142	1.05419	0.361816	0.422495	0.787567	0.636234	0.641332	1.0965	0.675297	0.949531	0.857372	0.371079	0.869153	1.29815	0.447655	0.788685	1.75454	1.72062	1.72848	1.90597	1.13751	1.00084	0.655404	0.448419	0.566563	0.228416	0.136517	0.387249	0.46574	0.134779	1.3671	1.15366	0.557197	0.609943	1.30061	1.45652	0.671893
11	1.81495	1.33108	1.00837	0.913684	1.29113	1.24757	0.919232	0.969165	1.03013	1.08645	0.171065	0.386073	0.842167	0.688447	0.707963	0.450753	0.811156	1.11547	0.592293	0.886362	0.491182	0.868209	0.926527	0.421238	0.905609	1.13445	0.61958	0.979362	1.51098	1.55554	1.19735	1.96055	0.738358	0.727347	0.449221	0.730448	0.415068	-0.768649	0.384793	0.61058	-0.10288	0.344105	0.800997	1.31916	0.901854	1.64043	2.25537	1.47007	1.08125
12	1.55035	1.43339	1.18795	0.363008	0.993314	1.38211	1.10122	1.54948	0.629083	1.11296	0.824462	0.767794	0.570821	0.570863	0.472562	-0.0968695	0.954661	0.472252	0.333975	0.669905	0.469488	0.790028	0.857337	0.16835	0.871301	1.60106	0.332033	0.569107	1.52862	1.42224	1.70874	1.4394	1.18458	0.963477	0.891356	0.560828	-0.569443	-0.0956641	0.08497	0.620157	0.2804	0.265687	1.12393	1.36333	0.764808	1.30283	0.835157	1.51063	0.361693
13	1.40541	1.18365	0.904852	0.930127	0.848661	0.91493	1.10438	1.43431	0.607794	0.770589	1.22323	0.674838	0.871585	0.501475	0.271432	0.565211	0.631205	0.942308	0.838285	0.26242	0.604339	0.42338	0.637287	0.334851	0.743031	1.44003	0.656602	0.859691	1.74087	1.5255	1.27417	1.53114	0.983068	1.02944	0.685536	0.865149	0.496031	0.259261	0.631974	0.435138	0.16187	0.192143	1.50872	1.43494	0.987095	0.901196	1.36222	1.21087	0.25681
14	1.7807	1.03877	0.537518	0.90674	0.934561	1.04818	1.37423	0.896627	0.961726	0.8767	1.25032	0.518586	0.898754	0.710119	0.265748	0.0485341	0.34046	0.637294	0.913168	0.708374	0.708061	0.505239	0.91723	0.488378	0.822847	1.38391	0.733107	0.50785	1.46016	1.51818	1.16118	1.58555	0.900997	0.985445	0.597024	0.830673	0.293001	0.253888	0.189265	0.499012	0.250081	0.317011	1.15133	1.28675	0.834581	1.9349	1.09217	1.70712	0.761629
15	1.74397	1.66777	1.59224	0.454479	1.35156	1.10683	1.52175	0.653756	0.338484	1.34561	1.53519	0.553789	0.905845	0.879901	0.556435	0.22688	0.724359	0.304339	1.03557	0.766771	1.37388	0.441931	0.95367	0.209582	1.03937	1.19935	0.727614	1.04993	1.21613	0.764818	0.697795	1.54131	1.17444	1.11106	1.04427	0.797147	0.424247	-0.0842463	-0.214957	0.290053	0.177821	0.181188	1.03605	0.272274	0.611619	1.46679	1.10671	1.32885	0.667209
16	2.40905	1.69969	1.07365	1.20236	1.14998	1.28309	0.684352	1.13241	0.841421	1.3738	0.999336	0.867054	1.09473	1.23606	0.32064	0.354988	0.188557	0.633474	0.767075	0.536559	0.88021	0.377684	0.632776	0.385054	0.878018	1.25823	0.606085	0.94463	1.2391	0.836365	0.903251	1.32695	0.823673	1.07227	0.778559	0.926134	0.340298	0.229386	0.156797	0.521331	0.420601	0.246273	1.36125	0.837322	0.41366	1.07171	0.649451	1.53115	0.830629
17	1.93286	1.40674	1.10099	0.809859	1.24872	1.24849	1.3018	1.28671	0.284268	1.09427	1.20739	0.879232	0.872021	0.601111	0.474306	0.174923	0.849038	0.38692	0.779746	1.13987	0.440813	0.445223	0.861207	0.155159	1.35138	1.22414	0.724158	0.9675	1.24328	1.20185	0.976258	1.5841	0.964812	1.01847	0.611884	0.49766	0.215145	0.232655	0.392706	0.300536	0.539332	-0.0784859	0.888973	1.20777	0.596901	1.63871	1.19874	1.14695	0.868765
18	1.15928	1.29066	0.662342	0.507733	1.27123	0.898871	0.71506	1.13463	0.565427	0.985706	0.911188	0.842141	0.937574	0.232955	0.846514	0.269517	0.789671	0.742949	0.661248	0.77472	0.914857	0.529862	0.79292	0.226694	1.59039	1.16111	0.616945	0.771991	1.18598	1.12265	1.26427	1.40192	1.461	0.906666	0.81033	0.531327	0.000578565	0.490874	0.350101	0.727722	0.323979	0.301706	1.44984	0.382246	0.612529	1.21272	0.970923	1.22322	0.738142
19	1.55015	1.80896	0.846675	0.209063	0.932908	1.31159	0.608926	1.27268	0.236828	0.985051	1.42749	1.16289	0.761998	0.617656	0.197229	0.112671	0.531055	0.634443	0.679289	0.396123	0.676784	0.80011	0.834497	0.119387	1.47607	1.3248	0.324043	1.01979	0.823155	0.48181	1.61118	1.04241	1.02733	0.927021	0.652832	0.846398	0.403096	0.277009	-0.15182	0.964444	0.264669	0.126672	1.06645	1.35962	0.895118	1.5626	0.977171	1.53985	0.665903
20	1.74108	1.3538	0.57368	0.768332	1.60218	1.03049	1.03527	0.986773	0.547341	1.3228	1.33977	0.927521	0.638231	1.17613	0.870039	0.201983	1.14787	1.10519	0.858359	0.844002	0.441758	0.466717	0.555383	0.291743	1.13004	0.594197	1.05233	0.918935	0.93321	0.552386	1.36937	1.21124	1.4282	0.784602	0.581573	0.787473	0.266929	0.246059	0.303936	0.479391	0.182755	0.422152	1.31499	-0.00952843	0.75197	1.1287	1.51112	1.50135	0.0198296
21	1.75952	1.47299	1.26502	0.708481	1.00716	0.916359	1.28517	1.11885	0.497167	1.14846	1.88726	0.636802	1.05468	0.649647	0.892219	-0.0845509	0.124578	0.946566	0.86315	0.999553	0.483552	0.795041	0.832695	0.143099	0.993298	1.1717	0.840672	0.715161	0.889933	0.953728	1.27532	1.27184	0.988867	0.448442	0.435376	1.12316	0.231879	-0.125151	0.351353	0.436354	0.63003	0.164466	0.699997	1.35165	0.641231	0.851253	1.13338	1.39758	0.96983
22	1.78603	1.67423	1.26098	0.84852	1.08083	0.676671	1.07139	1.50413	-0.0479282	1.02481	1.13071	0.738055	0.683882	0.736172	0.717668	0.167879	0.40374	0.952989	0.479148	0.743931	0.502944	0.435549	0.763141	0.418654	1.29777	1.24536	0.466423	0.854935	0.597712	0.993975	1.50633	1.0697	1.09304	0.797377	0.563229	0.807021	-0.35283	0.217666	0.327458	0.965182	-0.736993	-0.326703	1.28084	1.50381	0.662833	1.19184	1.40645	0.981949	0.756463
23	1.80905	1.29348	1.13967	1.08357	0.895231	1.43999	1.40805	0.831254	0.801486	1.2143	1.46641	1.06792	1.04514	0.429719	0.926814	0.516859	0.706536	0.84966	0.834126	0.816295	0.375265	0.429916	0.979933	0.0787568	1.37957	1.2803	0.681743	1.07083	1.36319	0.774627	1.29004	0.967997	0.942334	0.859668	0.646726	0.568389	0.485527	0.470934	0.212703	0.0825952	0.295738	0.310241	1.16916	1.36483	0.747397	0.984132	0.422741	1.13124	0.605486
24	1.93447	1.35169	1.16409	0.654059	1.30425	1.15922	1.20433	1.02225	0.714342	1.09199	1.13608	1.23304	1.10124	0.342271	0.803203	0.450738	1.10251	0.941393	0.63007	0.359581	0.175503	0.548825	0.780332	0.41634	0.935049	1.26016	0.488175	0.855356	1.36604	0.594414	1.91817	0.753464	0.819188	1.06383	1.10692	0.855969	0.336449	0.49031	0.0510624	0.379891	-0.199046	0.127624	1.2469	1.15095	0.661373	1.07809	1.3034	0.761792	0.61758
25	2.00846	1.72527	0.584202	1.02481	1.29337	1.45579	0.338669	-0.268899	0.605791	1.00916	1.5347	0.519952	0.893703	0.322675	1.02151	0.176251	0.858054	1.04549	0.441007	0.791378	0.149111	1.03639	0.835746	0.257688	1.18546	0.886814	0.57115	0.555937	1.06504	0.555108	1.61172	1.17749	1.17254	1.11356	0.45134	0.67044	0.081918	-0.0468946	0.114325	0.724362	0.79777	0.214612	1.47993	0.432583	0.906211	1.24538	1.12629	1.52571	0.402778
26	1.83312	1.35956	1.12811	1.28501	1.11559	1.13512	1.28024	1.14002	0.889708	1.32869	0.812119	1.0136	0.696218	0.828064	0.722567	0.0418096	0.673837	0.789569	0.644875	0.515807	0.298602	0.38603	0.544301	-0.0404554	1.31125	1.01005	0.554115	0.667511	1.34629	0.887724	1.25022	1.21807	1.14623	0.566778	0.564924	0.705649	0.492358	0.489761	0.684717	0.681671	0.11381	0.261262	0.842504	0.215373	0.62069	0.353563	1.04668	1.00552	0.958358
27	1.75944	1.21281	1.03925	0.964577	1.3763	1.05011	1.00014	1.09489	0.4738	0.674837	1.15187	0.932945	0.826681	0.616964	0.318092	0.0649519	0.621342	0.350384	0.395462	0.699394	0.00683105	0.311076	0.827333	-0.308642	1.24657	0.710864	0.603269	0.604266	0.925734	0.691198	1.17231	0.943984	0.710414	0.613914	0.165565	0.733383	0.532738	0.364317	-0.232843	0.52272	0.510832	0.0899195	0.99484	1.14252	0.70602	0.601676	0.899142	1.49662	0.40643
28	1.62305	0.985271	0.871468	0.553532	0.982579	1.02554	1.10463	0.642057	1.117	0.797271	1.58536	0.83818	0.04059	0.39048	0.786893	0.329826	0.554791	0.868524	0.455612	0.591401	1.09205	0.428849	0.648638	0.0684531	1.20223	0.897581	0.425683	0.884878	1.12148	0.536757	0.978427	0.890924	0.536845	0.673563	0.0315779	0.89017	0.278551	0.620118	0.0804702	0.431566	0.313183	-0.020075	0.996037	1.25027	0.532548	0.534001	0.831708	1.11286	0.435593
29	1.75261	1.48274	1.17506	0.648393	1.11838	1.16491	0.98076	0.724444	0.522924	0.110015	1.18945	0.693896	0.277237	0.491307	0.795266	0.140845	0.392271	0.489434	0.522753	0.171342	0.371052	0.475211	0.616358	-0.0702772	0.854154	0.684919	0.440169	0.761417	1.19871	0.84201	0.798173	0.965304	1.18325	0.700525	-0.189762	0.762658	0.0464937	-0.262791	0.0361417	0.530292	0.372638	-0.00346731	1.27109	1.58376	-0.17375	0.509092	0.670765	1.14966	0.580988
30	1.63339	1.00204	1.37693	0.511823	1.33823	1.20812	0.624731	0.659989	1.0261	0.674439	0.30465	0.53611	0.353693	0.385368	0.592435	0.22905	0.312519	0.706534	0.316935	0.576932	0.647559	0.368856	0.486272	0.227613	0.516844	0.935103	0.375747	0.306599	1.2739	0.385863	1.09263	0.818315	0.974615	0.671607	-0.447551	0.653615	0.104276	0.0211891	0.129935	0.351058	0.351675	0.00731177	0.118056	1.40803	0.17643	0.784323	1.11579	1.30801	0.74799
31	1.83045	1.16939	1.24756	1.20668	0.874005	1.12565	0.369156	0.71526	0.696094	0.694174	0.802679	0.788571	0.767883	0.498658	0.544726	0.223524	0.268394	0.519404	0.595221	0.385476	0.0909496	0.270736	0.813122	-0.0371165	1.14049	0.487728	0.557006	0.280997	0.762041	0.588141	1.13108	0.915624	1.01118	0.706085	0.219686	0.585795	-0.0527171	0.24451	0.241667	0.24376	0.0996711	-0.0579641	0.803863	0.467512	-0.146975	0.988236	1.41173	0.614947	0.315139
32	1.16174	1.05421	1.21392	0.121347	0.733152	1.07506	0.6662	0.952548	0.4391	0.826521	1.27034	0.812466	0.413726	0.501251	0.360389	0.437032	0.733478	0.716633	0.827441	0.373589	0.138303	0.330164	0.866305	0.241406	0.935221	1.18324	0.25126	0.481502	0.683831	0.660791	0.532696	0.990868	0.778384	0.572932	0.591633	0.718827	-0.0753785	0.120148	0.225467	0.829722	0.323754	-0.0867775	0.528832	0.534737	0.396876	0.578207	0.62646	0.984519	-0.00982391
33	1.52712	1.35088	0.702741	0.140382	0.4444	0.866444	0.458414	1.48091	0.953722	1.04716	0.939403	0.428992	0.435097	0.496508	0.882908	0.267094	0.362193	0.352278	0.806877	0.229035	0.333276	0.421472	0.536014	-0.295958	1.2002	1.16573	0.349896	0.32169	0.835776	0.308152	0.66332	0.778667	0.41744	0.299124	0.0503428	1.13661	0.362986	0.438724	0.288766	0.0941605	-0.529309	0.0700426	1.15505	0.719647	0.88484	0.721625	0.287808	0.895704	0.52073
34	1.45166	0.804495	0.836317	0.557646	0.585721	1.28675	0.953772	1.0885	0.0425189	0.873296	1.43811	0.245404	0.582404	0.916555	0.453098	-0.18665	0.740782	0.528086	0.681662	0.566777	0.176837	-0.048364	0.316674	0.150916	0.536789	1.03834	0.367793	0.184642	1.09177	0.507802	0.828366	0.745849	0.755771	0.461869	0.0847181	1.16702	0.601167	0.405083	0.0375275	0.307417	0.373777	0.261391	0.239838	1.44634	0.0626102	0.877017	-0.282958	1.03601	0.365816
35	1.57509	0.80313	0.804741	0.369617	0.768647	0.786651	0.363214	0.838601	0.583969	0.739981	0.536991	0.663369	-0.0438022	0.367602	0.44024	0.325928	0.549027	0.114557	1.00188	0.447433	0.172391	0.32947	0.407345	0.0111727	0.92465	1.15657	0.313912	0.549431	1.00615	-0.105609	0.51297	0.841584	0.298046	0.614714	0.516562	1.08458	0.497813	-0.21255	0.0724189	0.56975	0.40144	0.440823	0.399884	0.641309	0.0198862	0.80387	0.586457	0.864828	0.680934
36	1.27601	1.03049	0.849505	0.293554	0.775939	1.03561	0.784977	-0.0894267	0.616196	0.311792	0.11305	0.237477	0.637737	0.470391	0.622642	0.339987	0.314378	0.544934	0.48506	0.267881	0.388403	0.221762	0.331302	-0.225194	1.01019	0.987157	0.345191	-0.076434	1.38948	0.26309	0.226342	0.411026	0.723008	0.283684	0.0577372	0.53632	0.254759	0.0450108	0.491709	0.282518	-0.439653	0.167954	0.56988	-0.948787	0.659369	0.777076	0.273664	0.81108	0.663226
37	0.973589	1.05757	0.615836	0.41813	0.624828	0.689563	0.798901	0.858607	0.421692	0.769926	0.950208	0.741247	0.499162	0.138174	0.328941	0.0872374	0.510251	0.0782692	0.467441	0.226687	0.229412	0.0101239	0.40779	0.140489	0.708378	0.931024	0.144212	0.326426	1.18416	0.328455	0.813103	0.506594	0.482054	0.242338	-0.189986	0.537903	0.0736388	-0.666234	-0.0280597	0.322822	0.271157	0.478733	0.59603	-0.00166249	0.467909	0.582347	0.46488	0.83706	0.655026
38	1.08424	1.04134	0.701735	0.330092	-0.0538522	0.450885	0.121792	0.294366	0.527393	0.945449	0.346532	0.151729	0.445798	0.260658	0.779663	0.291016	0.224295	0.064569	0.215429	0.441805	0.363004	0.477322	0.633406	-0.0164721	0.804584	0.619704	0.262237	0.395493	1.13541	0.430222	0.564663	0.548694	0.451036	0.479947	0.108263	0.392123	0.00440088	0.317202	0.164501	0.48194	0.436443	0.0279574	0.485538	-0.0976663	0.601068	0.982169	0.717162	0.339969	0.459181
39	1.0326	0.621461	0.688346	0.145713	0.497031	0.828426	0.641826	0.760237	0.312697	0.455388	-0.397323	0.306771	0.274228	0.330797	0.452541	0.103496	0.403365	-0.00721365	0.632362	0.243795	-0.0647894	-0.0303253	0.759351	0.150055	0.705269	0.666011	0.109455	0.682859	0.990011	0.510545	0.626865	0.536785	0.75659	0.46104	-0.0013582	0.335053	0.634842	-0.439794	0.194834	0.357561	0.450754	0.403608	0.41903	0.379561	0.439704	0.57535	-0.0619686	0.652099	0.431563
40	0.807974	0.563799	0.599846	0.380035	0.730667	0.598904	0.71363	1.265	0.270703	0.716656	0.757869	-0.0982032	0.760651	0.113548	-0.238976	-0.0768824	0.00174183	0.290523	0.236948	0.581753	0.335715	0.292668	0.601249	0.361019	-0.226131	0.805597	0.571896	0.264916	1.05948	0.748822	0.90667	0.388436	0.15939	0.198911	0.11779	0.369631	0.130406	-0.245748	0.178852	0.096445	0.605893	0.289559	0.40357	0.641943	0.12498	0.498158	0.888394	0.6238	0.174161
41	0.929102	1.06252	0.141527	0.341167	0.912846	0.551135	0.613359	0.534131	0.112562	0.725531	0.214005	0.552623	0.209404	-0.417814	0.288975	0.144957	0.317759	0.395042	0.475762	0.105949	0.0797142	-0.0907583	0.317543	0.505891	0.567394	-0.0415706	-0.1416	0.248265	0.957153	0.807946	0.764425	0.536123	0.62277	0.186627	0.210648	0.394545	0.342559	0.120552	0.0386701	0.0763155	-0.364768	0.0586372	0.859498	0.00931291	0.402059	0.545503	0.812491	0.508271	0.452871
42	1.03858	0.50634	0.527089	0.542359	0.233868	-0.0335034	0.847849	0.714359	0.155726	0.672441	0.455912	0.70043	0.746294	0.388407	0.197561	0.403421	0.43811	0.0974059	0.149635	0.456595	0.0916978	0.152656	0.432315	0.456439	0.909333	0.635932	0.335404	-0.065405	0.875368	0.612256	0.430772	0.502619	0.483338	0.380134	-0.277281	0.751746	0.103237	-0.0159998	-0.00645934	-0.00926653	0.498032	-0.0687999	-0.142303	0.565843	0.222828	0.158526	0.399913	1.42162	0.492862
43	0.379687	0.490167	0.629708	0.127627	0.760428	0.742109	0.411605	0.616957	0.679415	0.187118	0.871594	0.520601	0.0228142	0.341024	0.400053	0.551511	0.0285743	0.467269	0.60893	0.0516189	0.182374	-0.264964	0.464601	0.195924	0.590814	0.648782	0.284508	0.275078	1.01946	0.48554	0.86736	0.563495	0.614125	0.634897	-0.241235	0.409162	-0.283238	-0.372747	-0.0958716	0.208583	0.0451958	0.13338	0.51102	0.923282	0.400968	0.6052	0.49143	0.182125	0.714567
44	0.76312	0.501811	0.874667	-0.0028334	0.509553	0.756683	0.773491	0.63796	0.0748214	0.837106	-0.246245	0.212975	0.541519	0.34043	0.41423	0.67442	0.302968	0.26882	0.271371	0.232197	-0.102493	0.173348	0.575252	-0.04328	0.478803	0.273287	-0.307385	0.115109	1.0962	0.247044	0.596411	0.393837	0.509661	0.532463	-0.127336	0.299133	-0.388364	-0.341942	0.393074	0.336852	0.0936487	0.0318446	0.744123	0.793252	0.099018	0.466045	0.440609	0.151718	0.266869
45	0.527794	0.500751	0.534217	-0.180712	0.471578	0.184516	0.344072	0.520264	0.248481	-0.0484519	1.00819	0.105573	0.134779	0.113026	0.0600937	0.22907	-0.0595715	0.108309	0.182715	0.128677	0.221102	0.87748	0.462863	-0.286805	0.319076	-0.251367	-0.21284	-0.308602	0.734478	0.504841	0.871158	0.476806	0.125392	0.407381	0.250605	0.373121	0.0907529	-0.194921	0.530816	0.545952	0.184202	0.182701	0.702806	0.725281	-0.539997	-0.302155	0.490648	0.200197	0.0367442
46	0.867973	0.653367	0.285057	-0.0784091	0.383691	0.498576	-0.230975	0.759183	0.577175	0.543841	0.520616	0.417729	0.689122	0.331538	-0.0086798	0.0963822	0.270334	0.442581	-0.065458	-0.225518	-0.183404	0.0794863	-0.00705811	-0.314218	0.260836	0.707744	0.174268	0.0841161	0.932424	-0.186906	0.407936	0.532692	0.0342605	0.27772	-0.044537	0.399636	-0.121242	-0.0961292	-0.0573333	0.512273	0.552552	0.210707	0.276611	0.0988308	-0.314847	0.237226	0.521904	0.550012	0.333004
47	0.63076	0.201417	0.683427	0.16823	0.260619	-0.0645477	-0.141655	0.182801	0.371079	0.841244	-0.258575	0.495044	0.181915	0.126057	-0.292574	0.113908	0.597638	0.427351	0.461093	0.178982	0.158009	-0.0506867	0.375119	-0.072542	0.333713	0.581977	-0.467684	0.158212	0.879421	1.06542	0.624116	0.33636	0.0382423	0.764226	-0.00876948	0.31281	0.194735	0.0952465	0.0297118	0.458044	0.169362	0.184142	0.529348	0.198258	-0.254762	-0.0972042	-0.198304	0.206156	0.420668
48	0.351174	0.623925	0.672223	0.26393	0.365886	0.143353	0.316054	0.888985	0.438174	0.0688762	0.388455	0.618811	0.208474	0.0589991	0.0431859	-0.0999002	-0.0807344	0.364833	0.195009	-0.340081	0.541886	0.173286	0.100361	-0.189268	0.261455	0.56198	-0.3175	0.0723252	0.740939	0.680317	0.322423	0.509038	0.387535	0.649967	-0.30771	0.437981	0.0868775	0.206809	-0.224882	0.264348	-1.09599	0.103888	0.0113122	0.268877	-0.346169	0.68623	0.606107	0.299094	0.1544
49	0.194545	0.203213	0.365902	0.198316	0.54635	0.0146415	0.148716	0.578736	0.563412	0.847067	0.0221504	0.229211	0.265463	0.176845	0.00650639	0.171677	0.4317	0.265759	-0.406587	-0.0533769	0.171707	0.142168	0.408746	-0.158998	0.254517	0.326383	0.0910675	-0.173711	0.808937	0.451156	0.404875	0.204257	0.302343	0.772161	0.517288	0.358694	-0.212381	-0.226601	-0.660801	0.164998	-0.0744753	-0.109795	0.351324	0.0977858	0.229747	-0.131124	0.768987	0.397316	0.264756
50	0.63165	0.350132	0.244759	0.0976502	0.445583	0.108468	0.842799	0.442703	0.0664117	0.379706	-0.431073	0.215878	0.581178	0.178008	-0.0068697	-0.402004	0.294395	0.0104636	-0.15233	-0.318455	0.380121	-0.168162	0.196952	-0.219501	-0.339871	0.0375854	0.131629	-0.297119	0.333707	0.558772	0.502785	0.27246	0.369334	0.404212	-0.115762	0.534338	0.0468872	-0.426106	0.347698	0.0595346	-1.1308	0.165753	0.625107	0.637353	0.0757074	0.0430331	0.484374	0.562794	0.0367468
51	0.578898	0.256274	0.32451	0.186273	0.138977	0.41457	-0.0835179	0.340138	0.199642	0.563856	-0.100812	0.388158	0.349784	-0.0936707	0.15822	0.114144	-0.0568379	-0.172684	0.422008	0.235732	0.174122	-0.257447	0.388195	-0.123681	0.385696	0.511034	0.00783081	-0.349105	0.499422	0.0916888	0.19188	0.254616	0.420747	0.00868048	0.0451834	0.423869	0.0775865	0.0801315	-0.346562	0.13996	-0.0223041	0.209046	0.625865	-0.0306526	0.22623	-0.220477	0.513952	0.0922809	-0.13547
52	0.857826	0.354831	0.242767	-0.0811537	0.213414	0.522098	0.235892	0.637655	0.529878	0.25383	0.467602	0.5781	-0.0481684	0.279527	0.0861086	-0.0661091	-0.074227	0.139138	0.124282	-0.178711	0.143813	0.0436046	0.279786	-0.31713	0.146731	0.45358	0.223328	-0.403395	0.31501	0.12393	0.26524	0.226713	0.0752503	0.349371	-0.166022	0.473095	0.032339	0.400235	0.177424	0.257206	0.537106	0.0960567	0.814912	0.370773	0.581336	-0.0875787	0.176267	0.0538825	0.489648
53	0.573688	0.12152	0.882872	0.284231	0.27665	0.0809423	0.145413	0.181588	-0.0598057	0.197625	-0.0124074	-0.173062	0.144113	0.136873	-0.435485	0.192898	0.408452	-0.00412124	0.166948	0.02151	0.269339	0.0753093	0.2196	-0.0158389	0.807845	0.198161	-0.108728	-0.0338344	0.546586	-0.126303	0.31251	0.211458	0.601332	0.643076	0.0851915	0.0915367	0.0538308	-0.0371745	-0.0589883	0.197108	0.516518	0.236894	0.069583	0.628405	-0.70823	0.679319	0.621972	0.00155549	-0.0738116
54	0.347135	0.605484	0.231986	0.698148	0.434468	0.345227	0.670587	1.03304	0.361852	0.472897	0.180407	0.316152	0.161009	0.472906	0.12626	-0.00796449	0.213324	0.177324	-0.111815	0.0957542	-0.321759	-0.612025	0.342053	0.0711163	0.353546	0.128038	0.023543	-0.00409242	0.527446	0.524432	0.519663	0.00902753	0.686303	0.0725826	-0.0882666	0.105254	0.48339	0.166651	0.0647173	0.176134	0.684439	0.0751143	-0.132324	0.475853	0.00555743	0.51586	-0.395597	0.403494	0.615629
55	0.656563	0.147272	0.285716	-0.105922	-0.108662	0.161934	0.00384893	-0.138943	0.515788	0.152669	0.349518	-0.15241	0.246396	0.389727	0.0724973	-0.476492	0.113832	-0.116686	-0.144838	0.0472684	-0.0694858	-0.0623234	0.764059	-0.0622973	0.402391	-0.0025376	0.281272	0.137153	0.390096	0.310548	0.560095	0.346798	0.333981	0.286138	-0.120097	0.398438	-0.399649	-0.0170834	0.293204	0.0854172	0.429231	0.106836	0.600337	-0.819954	-0.531086	-0.228379	0.257715	0.679871	-0.137707
56	-0.0594815	0.302351	0.299547	-0.0937628	0.0494851	0.259087	-0.075817	0.166491	0.557223	0.276773	0.395171	0.287299	-0.326128	0.274084	0.0955691	0.0376728	0.00674093	0.164073	0.0495746	0.533987	-0.175125	0.00832208	0.282412	-0.512727	0.3856	0.371268	-0.012459	-0.0438432	-0.491822	0.340304	0.551429	0.430284	0.184081	0.517181	0.378977	0.201108	-0.0612216	-0.198263	0.0874803	0.814655	0.431601	0.18285	0.227105	0.305105	-0.0796553	0.228612	0.149418	-0.123583	0.345825
57	0.383181	0.181707	0.247744	0.119412	0.0730124	0.120856	0.119393	0.256774	-0.0421827	0.310074	-0.434088	0.0895485	0.454495	0.427337	0.421875	0.125231	0.0068009	0.206401	-0.0205145	-0.0494912	-0.317379	-0.295685	0.426919	-0.186411	0.126786	-0.185089	0.360156	0.218344	0.441405	0.287353	0.203504	0.0208981	0.278779	0.147329	0.274746	0.193059	-0.00625935	0.308871	-0.245399	-0.224381	-0.379382	-0.129493	0.809471	0.792681	-0.0204172	0.115337	0.0762951	0.214908	0.303682
58	0.317465	-0.0788157	0.431737	0.0544797	0.144889	0.593186	0.383669	0.0687663	0.00733796	-0.045626	0.131844	0.199098	-0.0236027	0.00875723	0.151643	-0.175794	0.278925	-0.074173	0.0663219	0.430106	-0.139687	0.0695493	0.298907	-0.265402	0.0845636	-0.0649316	0.411224	0.191215	0.792823	0.0758665	0.120678	0.420474	0.0486827	0.103319	0.0541836	0.650469	-1.77294	-0.143446	0.0444292	0.404473	0.0350303	0.070037	0.164824	-0.933679	-0.132675	-0.598903	0.359443	-0.18675	0.344082
59	0.297371	0.597782	-0.00203416	0.18051	-0.0153004	0.419684	0.209521	0.613171	0.107945	0.397098	0.448669	-0.0818541	0.627424	0.268642	0.134142	-0.32742	0.355278	-0.167	0.0826741	-0.391506	0.258546	-0.116608	0.338842	-0.263421	0.199694	0.295062	-0.0902702	-0.0546685	-0.356192	0.291794	0.304858	0.0371244	0.312652	0.0273208	0.377004	0.290651	0.263315	-0.117894	-0.17913	0.159653	0.0774013	0.0727016	0.349251	0.344185	0.195734	-0.268764	0.168352	0.308588	0.659228
60	-0.257631	0.386317	0.0551653	0.108537	0.246034	0.248445	0.12637	0.55436	-0.0358479	0.242558	0.387352	0.511447	-0.0193062	0.573844	-0.0478732	-0.109798	0.0758193	-0.00104489	0.316863	-0.122186	-0.0143333	0.15345	-0.00260569	-0.210602	0.686996	-0.115289	-0.351091	-0.118669	-1.09831	0.0454543	0.291301	-0.00625424	-0.0845175	0.312703	-0.630724	0.501697	0.0585717	-0.353829	0.00303473	-0.158877	0.424782	0.229429	0.360425	-0.307031	0.391083	0.0352336	-0.0910982	0.263865	-0.0626242
61	0.116615	0.301193	0.0836535	-0.331121	0.663976	0.123033	-0.0557777	0.286297	0.503499	0.0375965	0.137732	0.224731	-0.375171	0.290765	-0.00398592	0.17155	-0.263899	0.110329	-0.0953872	0.143827	-0.460139	0.102522	0.0102902	-0.00576299	0.463749	0.189671	-0.0977795	-0.157045	-0.385843	0.590892	0.245285	0.374801	0.104736	-0.109783	-0.283806	0.475411	0.0939103	-0.110389	-0.269984	0.0791517	0.128391	-0.221297	0.203259	-0.248759	0.192184	0.362513	-0.63497	-0.330734	-0.389423
62	-0.0166211	0.16762	0.41337	-0.0787681	0.225754	-0.154568	0.500982	0.358545	0.498335	0.408792	0.333784	0.0664649	0.264363	0.463163	0.00148388	0.132845	0.285911	-0.22401	0.674051	0.0844887	0.0693792	-0.370295	-0.056839	-0.255257	0.00263133	0.550335	-0.0889389	0.134294	0.00591686	0.069935	0.182588	-0.205885	0.1486	0.0117656	-0.128471	0.215421	-0.234506	-0.380113	0.278234	0.0280945	0.410352	-0.0588699	0.433749	-1.10088	-0.73647	0.458594	0.194719	0.285983	0.406042
63	0.653101	0.227212	0.277168	-0.0666945	-0.110515	0.208624	0.140912	0.0601746	-0.0322239	-0.0306849	0.464515	0.452354	0.468239	0.0129349	0.119594	0.335642	0.474746	0.187271	0.329698	-0.232248	-0.0932634	0.130075	0.315696	-0.0450328	-0.442235	0.0257795	0.352256	-0.267879	0.147044	0.0395752	-0.166043	-0.054338	-0.021676	-0.0680925	-0.159151	0.0522789	-0.207065	-0.324648	-0.273977	0.024796	-0.307076	-0.0208703	0.407754	-0.0258732	0.198968	0.0742219	0.0688894	0.088881	-0.187052
64	0.244125	-0.147455	0.432541	-0.291213	0.0715911	0.111092	-0.0294926	0.275159	-0.249257	0.0861125	0.202341	0.0137138	0.340425	0.178407	0.0350842	-0.216052	0.285719	-0.230387	0.568025	0.133882	-0.0910732	0.0209197	0.109168	-0.0968874	-0.512989	0.0175657	-0.260939	0.157741	-0.0767326	-0.122737	0.0747443	0.207327	0.0188588	-0.0913939	-0.253301	0.294761	-0.210121	-0.288741	0.12102	0.252477	0.202825	0.1785	0.270768	0.545943	0.481275	0.125457	0.0841339	0.095193	0.307802
65	0.312759	0.0531575	0.131528	-0.270437	-0.0570325	-0.00244166	-0.807253	-0.107777	-0.127851	0.107892	-0.21205	0.135924	0.390762	-0.1486	0.206311	-0.166976	-0.695493	-0.214867	-0.00670512	0.12758	-0.269229	0.346747	0.0338153	-0.0605719	-0.175498	-0.0938769	-0.220472	-0.172685	-0.120238	-0.0668462	-0.160583	0.0302633	0.00637715	-0.120312	-0.0483244	0.356057	-0.068813	-0.132256	0.0084015	-0.158302	-0.2189	0.233246	0.403023	-0.298894	0.168204	-0.22187	0.234838	-0.0901091	0.163957
66	0.217728	-0.199876	-0.249106	0.437068	0.0659241	-0.218888	0.522707	0.337467	-0.242104	0.259654	-0.293459	-0.115868	0.188619	-0.00674698	0.0508959	0.0545085	0.298624	0.0323116	0.22751	-0.0517636	-0.094573	0.0951941	0.137768	-0.00997108	-0.255935	-0.0497767	0.344965	-0.0832907	-0.101014	-0.0366612	0.24722	0.212606	0.335981	-0.0865581	0.49416	0.247995	-0.604753	-0.525167	0.235019	0.224553	0.581691	0.0458346	0.312439	-0.205246	0.301706	0.0036084	0.243731	0.396564	0.573253
67	-0.0220254	-0.185805	-0.230478	0.262743	0.463514	-0.00638269	-0.389015	0.301379	0.0577512	-0.125039	0.458553	0.0104469	0.107041	0.00730767	-0.112066	0.368284	0.223536	0.541795	-0.021941	-0.0143074	0.0466183	0.139552	-0.172042	-0.0994566	-0.101697	0.0631492	0.290467	0.0854603	-0.0536443	-0.145484	-0.0663042	0.0897489	0.0514565	-0.0594645	0.261988	0.107081	0.0149407	0.0765302	0.0836096	0.262463	-0.693048	0.0128747	0.0137121	-0.559722	0.367899	0.296083	0.0993539	-0.554521	0.224986
68	0.0872915	0.0334017	0.0343898	-0.120302	0.269958	0.281947	-0.0122974	-0.117424	-0.0883781	-0.0131442	-0.325718	0.0561171	-0.28373	0.0111875	0.175595	0.361985	-0.173256	0.11919	-0.0212234	0.00856915	0.0980416	0.0467703	0.214562	-0.23176	0.0026797	0.0326503	0.0550632	-0.286282	-0.449387	0.0696819	-0.353396	0.219172	0.275507	-0.0431107	0.0825144	0.35435	0.0362963	0.166611	0.0997367	-0.605906	-0.0227392	0.228701	0.27648	-1.11704	-0.0649003	-0.273496	-0.165677	0.0472001	-0.00826918
69	-0.0567663	-0.215967	0.194133	-0.0963491	-0.264866	-0.0736928	-0.344908	-0.155445	0.311453	-0.1208	0.514437	0.0787852	-0.184918	0.16677	-0.123973	-0.524483	-0.362575	-0.018305	0.121311	-0.0529525	-0.0514835	-0.165709	-0.14942	-0.243525	0.198748	-0.0849399	-0.276234	0.225357	-0.500771	0.00149903	0.287673	0.193686	0.00668489	-0.0532496	0.319795	0.0673607	-0.0983064	0.114282	-0.154973	-0.0946686	0.162718	-0.194767	0.312381	0.370762	0.049895	-0.0100437	-0.229689	-0.208888	-0.168242
70	0.275294	0.12497	-0.120374	0.404389	-0.0474052	-0.157026	0.427926	-0.465399	0.00813934	0.236016	-0.46434	-0.0231748	-0.157872	-0.39203	0.285242	-0.438929	0.292825	-0.569463	-0.129276	-0.0860677	-0.0759617	0.116813	-0.219848	-0.100655	0.36719	-0.0413915	-0.0476184	-0.41027	-0.536827	0.00222532	-0.222904	-0.139772	-0.0292728	0.527575	-0.053994	-0.0741152	0.195475	0.0922622	-0.0940893	-0.00562756	0.257664	-0.197789	-0.973232	0.580538	0.27698	-0.00419998	0.241978	0.311193	-0.249743
71	-0.188365	0.0763284	0.192013	0.17678	0.123305	0.0010093	0.207208	0.0986856	-0.0523639	-0.589184	0.222272	-0.00148186	0.00971527	0.134954	-0.212695	0.0586981	0.21603	-0.0195461	0.0289655	0.325118	-0.385908	0.120472	0.159346	0.378981	-0.11003	-0.28085	0.20459	0.223407	0.0648021	0.238219	-0.109547	-0.167627	0.0948818	0.0406977	-0.0903167	-0.382591	-0.0191091	-0.0287037	0.192941	-0.428996	0.129556	-0.0541482	-0.0943844	0.593661	-1.19717	-0.233108	0.080859	-0.228617	-0.188798
72	-0.692492	-0.0923117	0.122504	-0.483307	-0.42286	0.0362211	0.0697238	-0.388915	-0.0655672	-0.0446112	-0.386866	0.108869	-0.118974	0.0913312	0.0297479	-0.0885641	0.088137	0.149679	0.06015	0.075801	-0.0618411	0.0343772	-0.277335	-0.115696	-0.177598	0.171751	-0.864744	0.176936	0.206806	-0.0246391	0.151271	-0.0571268	-0.076019	-0.0144139	-0.125977	0.241681	0.210695	0.106991	-0.20676	-0.0655976	-0.345773	-0.0371401	0.810194	0.390508	0.352532	0.12347	0.0164346	-0.336271	-0.219015
73	0.38246	0.380223	0.154145	0.0940172	-0.11154	-0.265559	-0.132136	0.0580364	0.212228	-0.0204118	0.38629	-0.255393	0.0724331	-0.124038	-0.212039	0.0156148	-0.417556	0.107431	-0.165655	0.117136	-0.299305	-0.220525	0.0178445	0.0539675	-0.46059	-0.0755891	0.00606808	0.244767	0.227697	0.131238	-0.111358	-0.0914309	-0.195091	0.0840507	-0.435546	-0.259033	-0.211248	0.232346	-0.0425885	0.1995	-0.105273	0.283915	-0.0120471	0.450545	0.113679	0.129071	-0.260487	0.0513723	0.168785
74	-0.258673	-0.278844	0.0817089	-0.350583	0.0480784	0.247448	-0.206815	0.15106	0.0283329	0.28511	0.1034	0.00807741	0.152551	0.16392	0.196285	0.255224	-0.0125021	-0.13751	-0.047761	-0.0465649	0.307685	0.0234243	0.27147	0.294856	0.298262	0.336856	0.124727	-0.131821	0.790375	0.0676221	-0.0155969	-0.113277	-0.200326	0.010197	-0.253686	-0.0184594	0.172648	0.0270134	-0.0805752	0.255481	-0.255616	-0.07701	-1.11652	-0.318637	-0.245703	0.0356648	0.0415189	0.56542	-0.105724
75	0.255549	0.357881	-0.178937	-0.324458	-0.124109	0.154922	-0.142393	0.180556	-0.16949	0.132411	-0.214569	0.133622	0.215134	-0.0526553	-0.0769941	-0.0623387	-0.153263	-0.205583	-0.0520796	-0.274968	0.516727	-0.19037	0.0176546	0.0732576	0.23897	-0.0718595	0.162715	-0.0442645	0.351965	-0.303701	0.192941	-0.14598	-0.263803	-0.405724	-0.198937	-0.28427	0.303361	-0.262165	-0.0323208	0.258799	0.290818	-0.0104713	0.470975	-0.185365	0.0450833	-0.0670501	-0.0680228	-0.0434542	-0.0272333
76	-0.305571	-0.245122	0.0647554	-0.474209	0.524514	0.0454208	-0.0125203	0.518861	0.379205	-0.115047	-0.412202	-0.0480394	0.362502	0.0979015	-0.0305567	-0.456114	-0.178377	-0.110705	-0.155269	-0.0999411	0.166976	-0.469294	0.155464	-0.0378677	-0.626235	-0.199676	-0.236294	-0.196676	0.380554	0.0265051	0.0333427	0.0100389	-0.211816	-0.562501	-0.321556	-0.0674411	-0.0192007	-0.222273	-0.175434	-0.138162	0.172079	0.10025	0.249785	1.06864	-0.0428497	-0.0569728	0.100485	0.0666494	0.40503
77	0.247055	-0.011491	-0.31065	0.0550579	0.270629	0.318691	-0.120295	0.00775997	0.323562	0.328872	-0.0159402	-0.0198115	0.4855	0.252218	0.217691	0.169739	-0.111249	0.140184	-0.382207	-0.190713	0.176967	-0.150812	0.270503	-0.217161	-0.0584469	-0.0436379	0.22192	-0.0916951	0.837016	0.103577	0.228235	0.24834	0.00836321	0.00952957	-0.540148	-0.0955553	0.204998	-0.909653	-0.0216829	0.208557	0.094711	0.0351529	0.562651	0.451599	0.121643	-0.180748	0.334464	-0.149217	0.104986
78	-0.0447151	-0.0475574	-0.0170953	-0.327592	-0.17492	0.518542	-0.577265	-0.372273	-0.384465	-0.166272	-0.418425	0.0898163	0.28	0.411254	-0.0289261	-0.261725	-0.110981	0.0207358	-0.231515	-0.0970531	0.318192	-0.00880852	0.0705085	-0.0697654	-0.0233561	0.0863516	-0.154546	-0.228987	0.796455	0.135792	0.660542	0.369531	0.46409	-0.0202639	-0.530711	0.133414	-0.023943	-0.366635	-0.18424	0.0226577	-0.0278365	0.172935	1.07008	0.13016	0.304057	-1.07645	-0.188188	0.35042	0.109901
79	-0.0844459	-0.277685	0.143293	-0.0263782	0.0930906	0.31591	0.460303	0.511752	0.137261	-0.222102	0.0860092	-0.12183	-0.109367	-0.0174401	0.0714781	0.41422	-0.114835	0.292292	-0.532327	-0.154549	0.386977	-0.0152453	-0.155139	0.118549	0.0232996	-0.180791	-0.0239409	-0.172796	0.919209	0.194373	0.323696	0.406395	0.451379	-0.0270781	-0.085797	-0.007903	-0.208292	-0.0758959	0.274004	0.0163758	0.0232507	0.174398	0.141243	0.37936	0.155346	0.59513	0.489292	0.50473	0.135216
80	-0.159783	-0.0348694	-0.273387	0.091796	-0.112955	-0.00933699	-0.808019	-0.0237483	0.32055	-0.0233626	0.288561	-0.32161	0.0205469	0.317898	0.169104	-0.0710323	0.388458	0.0323647	0.0609466	-0.315271	0.256552	-0.139308	0.0693124	-0.778391	0.235636	0.0971943	0.218886	-0.368348	0.642413	-0.00392435	0.301511	0.37967	0.137408	-0.0710934	0.357993	-0.0492863	-0.153549	-0.529432	-0.125769	-0.0485959	-0.126356	0.524454	0.195675	0.755472	0.588372	0.0965522	0.400328	0.279553	0.385377
81	0.359577	-0.0717592	-0.246085	0.383425	-0.0858402	0.139815	-0.0403094	0.42391	0.0260701	-0.0270393	-0.650174	-0.116726	0.216104	0.42892	-0.0127654	0.233702	-0.174475	0.152018	0.201685	-0.0301263	0.200959	-0.130652	-0.118532	-0.162267	-0.0729402	0.4231	0.475747	-0.00917455	0.579154	0.0772689	0.172982	0.725395	0.351794	0.173606	0.0867915	0.756834	-0.108043	0.482676	-0.0469048	-0.367697	-0.315977	0.196098	0.389348	-0.567747	1.05108	0.168518	0.394704	0.760854	0.155131
82	0.542956	0.202666	0.51186	0.301952	-0.273224	0.727064	-0.291378	-0.766587	-0.0249452	0.0410001	-0.141917	0.338759	0.179074	0.230713	-0.00878837	-0.487185	0.0531306	0.162653	-0.0772202	0.0365121	0.228525	0.25712	-0.156193	-0.565371	0.200857	0.387183	0.357255	-0.133151	0.288183	0.133535	0.840507	0.547029	0.482028	-0.304934	-0.0643387	0.590877	0.574497	0.284397	0.494	-0.0847291	0.294681	0.240881	0.785481	0.902943	0.574345	0.274224	0.160579	0.665327	0.549938
83	0.283708	0.0416733	0.461573	0.252733	-0.140787	0.695623	-0.0180199	0.217778	-0.0929267	0.270668	-0.0167102	0.201183	0.356486	-0.0115645	0.0461908	-0.13288	-0.419705	0.253024	-0.156925	0.102889	-0.453021	0.168854	0.28153	-0.429746	-0.3175	-0.242158	0.38995	-0.0942575	1.00307	0.387946	0.48374	-0.55335	0.604365	0.326742	-0.45931	0.440505	0.358905	0.0438319	-0.313032	0.163629	0.24059	0.0817193	0.178375	0.713987	0.514587	0.649115	0.407119	0.461267	0.690437
84	0.377102	0.0918243	0.503671	0.236716	0.10692	0.741456	-0.100866	0.31348	0.16276	0.346194	0.0419732	0.035737	0.33815	0.248341	0.00341592	-0.184218	-0.144707	0.276885	0.118371	0.130144	0.224192	-0.0473724	-0.210517	-0.345483	0.135277	-0.0884843	-0.0495856	0.1931	0.501514	-0.204348	0.898601	-0.10563	0.369074	0.319619	-0.0463328	1.2221	0.345641	-0.0613083	-0.57341	0.342026	0.676008	0.0905267	0.568333	1.00784	0.523658	0.400137	0.314076	0.65599	0.102328
85	0.0624954	0.074048	0.31687	0.108896	0.0264633	0.467786	0.164409	0.0949546	0.0200897	0.707436	-0.277205	-0.125069	-0.110778	0.123503	0.336647	0.0807396	-0.329924	0.700366	-0.301084	0.529891	0.291232	0.042787	0.373757	-0.256173	0.143172	0.155591	0.416522	-0.0997832	0.952453	0.66039	0.677574	0.154126	0.835481	-0.0561591	0.29818	0.433059	0.111794	0.385824	0.244146	0.425392	0.159809	0.469954	0.557114	0.324585	0.872528	0.208517	0.551403	0.856038	0.577465
86	-0.0308917	-0.185737	0.671409	0.37628	0.156127	0.521737	-0.110322	0.0769473	-0.105615	-0.00810134	0.049225	0.331753	0.243118	0.124829	-0.052196	0.118477	0.403831	0.101124	0.146254	0.109511	-0.110742	0.269775	-0.116322	-0.427428	0.179905	0.278999	0.47068	-0.245135	0.879933	-0.0286141	0.00452933	0.68814	0.840062	0.379249	0.710511	0.703139	-0.138607	-0.0161675	0.277107	0.557398	0.404	0.133988	0.731225	0.910558	0.692228	0.204366	0.482906	0.523159	0.806029
87	0.0606951	-0.382279	0.298918	0.641663	0.445111	0.479637	-0.526106	-0.019803	-0.116574	0.359987	0.0478067	-0.162084	0.653829	0.119637	0.0290099	-0.262332	0.39173	0.380709	-0.0422019	0.149279	0.33223	-0.0222261	0.302572	-0.423433	0.824738	0.195576	0.338975	0.141165	0.719245	0.259171	0.752013	0.988095	0.60523	0.252337	0.349031	0.778934	-0.0500798	0.328383	0.340588	0.188308	0.478365	0.0675048	0.919228	0.843823	1.04157	0.130404	0.669042	0.486638	0.795546
88	0.161783	0.0751863	0.172626	0.456585	0.455042	0.867971	0.0154559	0.330372	0.139767	0.193698	-0.143366	0.347827	0.375283	0.292117	-0.198471	0.346839	0.879782	0.527862	0.173627	-0.0565036	0.11946	-0.24282	0.280399	-0.236715	0.474567	0.147619	0.769026	-0.267824	0.804961	0.304921	0.737384	0.869877	0.80085	0.380136	0.108364	0.756726	0.350044	0.169432	0.35101	0.006941	0.268308	-0.0348005	0.763843	1.2951	0.255147	0.55412	0.655572	0.803651	0.823647
89	0.149357	0.367718	0.17278	-0.419653	0.61196	0.801698	-0.3877	-0.0796975	0.201627	0.403117	-0.190787	0.0697694	0.0674646	0.167218	-0.0214396	0.029485	0.207552	0.280805	0.355184	0.0872261	0.269007	0.241036	0.0921257	-0.10877	0.574613	0.144903	-0.157497	0.208905	0.763417	0.0896543	0.823063	0.76758	0.991337	0.527197	0.0635773	0.516615	0.224068	0.461047	-0.0329849	-0.289308	0.4825	0.210397	0.75356	1.51476	1.05406	0.601007	0.649861	0.592273	0.888133
90	0.349346	0.606063	0.00394162	0.457948	0.43337	1.47189	-0.215733	0.0626072	0.210157	0.145463	0.161313	0.0117611	0.333444	0.684845	-0.00842319	-0.117652	0.123532	0.72686	-0.0756253	0.101835	0.0135352	-0.284232	-0.134954	-0.762907	0.763225	0.0541494	0.254615	0.351154	1.04183	-0.201031	1.1529	0.791101	0.4673	0.697568	0.695631	0.656296	0.0962736	-0.147971	-0.000933613	0.0708458	0.277927	0.0473355	0.651624	0.349905	0.988837	0.620218	0.998344	0.834291	0.955298
91	0.41962	0.279473	0.546884	1.06543	0.168339	0.517016	-0.338065	0.119764	0.429435	0.27269	0.00929308	0.332513	0.0624649	0.410572	-0.196077	-0.294836	0.645669	0.477204	-0.0482755	0.014177	0.0756989	-0.16025	0.202515	-0.595139	0.43741	0.447699	-0.596611	0.688441	0.938253	0.0389919	1.13592	0.98993	1.0601	0.960846	0.815898	0.979971	0.352005	-0.0857479	0.1551	-0.232275	0.482388	0.145266	0.0151054	0.826458	1.14512	1.1019	0.09532	0.860224	0.881974
92	0.389469	0.39108	0.0911571	0.628366	0.439816	1.16838	-0.269144	0.109769	0.554906	0.129468	0.10979	0.615077	0.108714	0.452536	-0.114249	-0.228701	0.322942	0.324617	0.0423995	0.489816	0.175903	-0.0234476	0.100897	-0.436772	0.464824	0.450105	0.216253	1.2696	0.855853	0.598	1.21642	1.09901	0.792363	0.925447	1.08005	0.847735	0.465483	0.0757639	0.48106	0.118807	0.666184	0.28205	-0.146455	1.22052	1.26046	0.293239	1.11585	0.982114	0.696801
93	0.606198	0.425484	0.378467	0.594086	0.725656	1.08432	-0.328449	-0.0316829	0.22556	0.512615	0.205534	0.0999128	0.665966	0.619744	0.000211516	0.110361	0.151551	0.345691	0.165058	-0.0587965	0.245582	0.183993	0.0823038	-0.379602	0.701946	0.379942	0.314659	0.86348	1.34632	0.295577	0.882933	0.828046	0.91373	0.639887	0.806375	0.725164	-0.0388943	0.268523	0.377059	0.111218	-0.281686	0.548522	1.21961	1.16908	1.04532	0.461837	0.803887	0.925754	0.542983
94	0.563938	0.630109	0.317559	0.501763	0.236634	1.12262	-0.060749	-0.0592545	0.616557	0.47908	-0.0909937	0.021002	0.613171	0.800315	-0.0125426	-0.144435	0.549567	0.486556	0.204169	0.254619	0.258139	0.154291	0.0339619	-0.633687	0.896779	1.19029	-0.0370896	0.843598	0.842986	0.620004	1.26126	0.777998	1.18391	0.778117	0.78886	1.22981	0.491444	0.351365	0.291525	-0.103324	0.237856	-0.344794	1.15109	1.15303	1.17467	1.10148	0.710925	0.885601	1.14568
95	0.729472	0.397872	0.387133	0.62766	1.10411	1.32981	0.138442	0.072135	0.257764	0.0813819	-0.144142	0.167323	-0.0294095	0.197668	0.141746	-0.283783	0.374178	-0.1671	-0.0347569	-0.393285	0.199611	0.435007	0.223718	-0.0114706	0.901292	1.00864	0.299799	0.357201	1.26212	0.978479	1.46816	0.862688	1.55827	1.05284	0.376352	1.06054	0.269838	0.146094	0.460885	-0.42183	0.335235	0.28326	1.61181	1.41761	1.6064	1.01949	0.462656	0.936766	1.10611
96	0.303122	0.518274	0.0804041	0.316484	0.702562	1.15855	-0.222125	0.256175	0.136687	0.508611	-0.154666	-0.211905	0.197901	0.645175	-0.0656459	0.219732	0.769258	0.235964	0.309853	0.314145	0.489011	0.118195	0.262467	-0.383045	1.09872	0.684948	0.0927744	0.935098	0.754959	0.696237	1.71512	0.752582	1.73103	0.922695	0.696929	1.23874	0.280707	-0.137668	0.345729	0.409306	0.333976	0.130297	0.70614	0.871361	1.52587	0.524483	0.946335	0.9573	0.41937
97	0.840589	0.557515	0.132533	0.657619	0.572412	0.790816	0.308784	0.217844	0.415463	-0.0613479	-0.184953	-0.164496	-0.346043	0.490098	-0.0644677	0.0990298	0.335943	0.397162	0.121381	0.223491	0.456116	0.0482649	0.0663549	-0.2525	0.280422	0.839173	-0.0406011	0.355862	1.08445	0.618828	1.06115	0.897669	1.68428	0.655175	1.03945	1.42735	0.250983	0.0656372	0.720906	0.20728	0.534141	0.107065	0.819032	1.4093	1.33776	0.64116	0.734187	0.98662	0.746117
98	0.667676	0.681734	0.281947	0.711706	0.548915	1.13929	-0.76904	0.695212	0.348603	0.401985	-0.110555	0.236428	0.309113	0.315469	-0.211672	0.0248279	0.700039	0.374197	0.195846	0.312133	0.329395	0.62916	0.084391	-0.274457	0.436251	0.68186	0.116878	0.730653	1.24752	0.462697	1.29901	1.05961	1.39716	0.449702	0.88438	1.45137	-0.557846	0.197806	0.400322	-0.0214688	0.721719	0.228526	0.585213	0.60758	1.46357	1.24777	0.864518	0.549623	0.976907
99	1.07344	0.268542	0.179509	0.459968	0.139128	1.29384	-0.343008	-0.0868275	0.813448	0.225525	0.318593	0.0075439	0.471594	0.745854	-0.161379	0.178138	0.619892	0.13282	0.21168	0.328611	-0.160148	0.0353951	0.536889	-0.317695	0.833812	0.49633	0.403607	0.636021	1.37103	0.525123	1.12152	1.36783	0.943717	0.45745	0.833394	1.37721	0.0901338	0.140471	0.513201	-0.0175913	0.359255	0.304245	0.501575	1.44301	1.27019	0.638673	0.654595	0.71523	0.806289
100	1.12621	0.514084	0.181903	0.847364	0.111843	1.42979	-0.062794	-0.237315	0.00796942	0.221707	0.37645	0.453309	0.176937	0.852463	0.157381	-0.132721	0.533394	-0.184394	0.0415954	0.533047	0.300311	0.674257	0.393173	-0.0855797	0.0095134	0.599444	0.265137	0.153234	1.07136	0.351989	1.11303	0.870439	1.09363	0.318046	0.754475	1.1445	0.546178	-0.125425	0.195518	0.175073	0.717784	0.278463	0.876763	0.657482	0.834753	0.0572344	0.955932	1.02362	0.795228
101	1.00554	0.34029	0.402886	0.634908	0.29885	0.810279	0.184134	0.343087	-0.087261	0.122177	0.026725	0.00638831	0.0504856	0.435926	-0.021234	0.0491324	0.725102	0.268579	0.354494	0.494816	0.0993621	0.304264	-0.212036	-0.228489	-0.0970922	0.694163	0.124519	1.07959	0.901587	0.37073	1.82276	0.945708	0.77153	0.420926	-0.0442851	1.30629	-0.528677	0.0365662	0.552574	0.358233	0.425905	0.316278	0.90934	0.795906	1.11153	0.552975	0.981451	1.17041	0.826451
102	0.8613	0.457533	-0.0239591	0.65757	0.125927	1.00794	-0.177363	0.291139	0.237413	0.453717	-0.194705	0.0453348	0.299277	0.514094	-0.0632832	0.0681404	0.610681	0.595682	0.00669443	0.281965	-0.082909	0.0409328	0.0960104	-0.168579	0.424237	0.643015	0.00987648	0.716881	0.8738	0.665584	1.5611	1.16374	1.23819	0.679271	0.800383	1.51054	0.171282	-0.840556	0.503178	0.394546	0.31215	0.234391	0.242133	1.26712	1.22815	0.960833	1.23388	1.18775	1.68671
103	1.25684	1.02287	-0.190686	0.934904	0.610528	0.989851	-0.511148	0.711719	0.879913	0.745445	0.273877	0.337532	-0.0275203	0.757512	0.311019	-0.167655	0.906834	0.360467	0.00589193	0.197618	0.262848	0.466675	0.00624678	0.038748	0.242126	0.596733	0.657798	0.915548	1.35698	0.528527	1.46211	1.28074	0.350938	0.484049	0.390769	1.0045	-0.143749	0.421639	0.826942	0.410909	0.357648	0.41516	1.10754	0.458782	1.48598	0.934013	0.974717	0.725257	1.33303
104	0.879414	0.293767	0.491339	1.04721	0.458177	1.35821	-0.439367	0.0535738	0.158332	0.341611	0.289007	-0.102429	0.0342901	0.552828	0.329343	0.231418	0.726094	0.442894	0.304327	0.318523	0.396824	0.504327	-0.0183127	-0.362096	0.307936	0.982874	0.438667	0.631694	0.898612	0.73413	1.82792	1.09742	0.751106	0.892173	0.24545	1.13007	0.0881402	-0.812378	0.607777	0.158342	0.397767	0.352182	1.2009	1.05617	1.32076	0.905483	0.892043	-0.750036	1.07175
105	1.11289	0.698204	0.364347	1.06669	0.696452	1.07621	0.822999	0.434018	-0.0916055	0.93029	-0.0253336	0.296955	0.387902	0.931174	0.168123	0.120863	0.230333	0.891884	-0.452671	0.295742	0.31988	0.534464	0.99251	-0.187833	-0.0194952	0.358163	0.530499	0.95814	0.974953	0.302972	1.14239	0.598801	0.261122	0.384639	0.881265	1.59158	-0.318729	0.238223	0.878222	-0.0284565	0.463778	0.353565	0.468903	1.14375	1.44529	0.837094	0.785633	0.891028	1.11104
106	0.773203	0.614958	0.548729	0.532495	0.417046	1.04936	-0.131808	0.00683815	-0.197866	0.302838	0.180121	0.0642563	0.35376	0.394521	0.150186	-0.394311	0.330278	0.661532	-0.279977	0.66684	0.28219	0.723227	0.940276	-0.065311	0.500109	0.294858	1.12005	1.48548	1.03401	0.63519	1.78205	1.55088	1.58388	0.654085	0.327571	1.11651	0.299057	-1.1588	0.65124	0.35873	0.48317	0.293132	0.387159	1.01058	0.80098	0.953024	0.646159	0.959686	1.46473
107	1.0831	0.770684	0.596975	0.42948	0.677602	0.882436	0.336898	0.364869	0.0382837	0.49808	0.309158	0.424815	0.183676	0.331447	0.258447	0.264032	0.197054	0.322351	-0.303085	0.363506	0.0593911	0.555951	0.731352	-0.289993	0.73577	0.841999	0.604349	1.1144	1.04469	0.745142	1.56221	1.64093	1.58443	0.438659	0.92514	1.47394	0.295373	-0.0534318	0.677453	0.574963	0.512773	-0.135777	-0.00484387	1.07386	0.251576	0.840462	1.12306	0.879522	1.02732
108	0.717375	0.494682	0.220961	0.035633	0.349536	1.09795	-0.090782	0.704455	0.287941	0.0126165	0.17602	-0.155887	0.306755	0.525441	0.0298674	0.0179436	0.202632	0.446218	-0.0523753	0.0660567	0.625021	0.679221	0.528707	-0.482941	0.562909	0.617259	0.581686	0.942041	0.680565	0.151264	1.40988	1.68679	1.06022	0.468909	0.571083	1.16967	0.37951	-0.304796	0.733882	0.306276	0.0238275	-0.169969	1.43058	1.01866	1.46462	0.952987	0.894118	0.457671	0.983639
109	0.954154	0.497904	0.47836	1.19487	0.99403	1.02324	-0.291445	-0.021332	0.260156	0.698576	-0.216454	-0.104539	0.853145	0.569448	0.361813	0.0504194	0.314654	0.524934	-0.104312	0.682176	0.247237	0.157878	0.124612	-0.269228	0.352518	0.895501	0.706736	0.692791	0.784359	0.59388	1.85269	1.16611	1.24163	0.693173	0.977883	1.64092	0.381467	-0.635597	0.776936	0.519392	0.60883	0.0353159	0.781745	0.527343	1.20384	0.518976	0.703142	0.617593	1.36962
[truncated: 66 more rows]
[truncated: 71 more columns]

## Sheet: Fig 2E VGLUT-pH 60s pulses
Source Data	Figure 2E	AWC VGLUT-pH Data: individual dF/F(%) traces - 60 sec stimulation
[truncated: 630 more rows]
[truncated: 10 more columns]

[truncated: 6 more sheets: Fig 2E VGLUT-pH 180s pulses, Fig 2G SyGCaMP dfdt 10s pulses, Fig 2G SyGCaMP dfdt 60s pulses, Fig 2G SyGCaMP dfdt 180s pulses, Fig 2G SyGCaMP Stats Analysis, Fig 2H ]
