# Supplementary material for: Diverse modes of synaptic signaling, regulation, and plasticity distinguish two classes of C. elegans glutamatergic neurons
Source: eLife. 2017 Nov 21;6:e31234. doi: 10.7554/eLife.31234 (PMC5705214; doi:10.7554/eLife.31234)
Supplement: Figure 3—source data 1. [file elife-31234-fig3-data1.xlsx]

## Sheet: Fig 3A
Source Data	Figure 3A	AWC VGLUT-pH Data: individual dF/F(%) traces
		Three trials per animal: Read from left to right; Trial 1 signifies a new animal
		Acquisition Rate: 5 Frames/sec
		Stimulus ON:	Frame 25
		Stimulus OFF:	Frame 325
	wt (TeTx Array Negative Control)																													AWC-ON TeTx
Frame / Trial #	1	1	2	3	1	2	3	1	2	3	1	2	3	1	2	3	1	2	3	1	2	3	1	2	3	1	2	3		1	2	3	1	2	3	1	2	3	1	2	3	1	2	3	1	2	3	1	2
1	1.43321	2.24729	1.80235	1.90126	3.20118	2.64407	2.4179	5.17822	5.10975	5.44158	3.90251	2.97663	2.15625	1.92167	3.27719	3.41944	7.428	8.89604	6.99705	4.74242	5.65582	6.04521	3.02264	2.42679	3.35561	4.98814	4.83418	5.86653		0.0434822	0.122673	0.196162	-2.20751	-0.492606	-0.0704813	1.96879	-0.281307	-0.124023	0.675919	0.506568	0.362243	0.74118	0.881648	-0.0202419	0.370446	1.01053	1.16444	NaN	0.728836
2	2.44159	3.09006	2.04125	1.75288	3.07746	3.31078	1.79439	3.46332	5.47404	5.65554	4.27465	2.52443	2.263	2.73601	2.663	2.81199	8.1484	8.97915	6.41568	5.69287	5.67999	4.59642	2.70135	2.26101	2.53184	4.59562	3.74815	2.85719		0.611135	0.154825	-0.435673	-1.00945	-1.87275	-0.784787	0.104693	0.0885982	0.706123	1.34072	0.741213	-0.478288	-0.673023	0.63666	0.21888	0.152326	-0.834608	0.953886	-1.928	-0.465311
3	2.41529	3.39989	2.12394	2.85311	3.17037	2.26352	3.34879	4.41579	2.82389	5.72603	3.54517	3.01029	3.02747	2.51517	3.36512	3.13332	7.98095	8.0944	6.27205	5.85184	4.86981	4.90709	2.74775	2.74014	2.80341	3.5672	3.62927	5.86761		-1.17676	0.164805	1.07351	-2.31663	-1.26365	-0.799168	1.29537	-0.312841	-2.02714	-0.625498	0.40526	0.579078	-1.32195	1.02349	-0.937574	1.04358	0.0265085	0.772624	-2.38701	0.542687
4	2.56326	4.32216	1.44857	2.61525	4.14238	2.62984	3.17339	4.99494	4.90199	5.80518	2.88544	2.13246	1.67406	0.337124	3.52707	2.72744	8.22112	8.08935	6.41194	5.66989	5.49543	6.16916	3.78966	2.96852	3.4858	5.16237	4.05942	6.12348		1.4312	1.46352	0.986885	0.0419477	-0.51264	-0.147833	0.463878	0.299798	-0.210821	-0.0414159	0.165095	0.813121	-1.05479	0.783057	-1.11347	-0.263644	0.77964	0.645498	-1.48512	0.133039
5	3.97284	3.07174	0.809579	2.12984	2.15786	2.67242	2.57501	4.89292	4.48347	4.83347	3.29966	2.82706	2.38064	2.89615	2.83091	2.82279	7.34942	7.83414	6.97344	6.69534	5.40138	4.67867	3.00351	2.86771	2.19038	2.59003	3.33629	4.74511		-1.28784	0.761121	1.88955	-1.7458	-0.761562	-0.535821	0.66251	0.419176	0.476699	0.736989	0.588185	1.3755	-0.853293	1.27508	-1.15688	0.68882	0.168234	0.055892	-2.18154	-0.216914
6	3.03699	3.24408	2.67616	1.05811	2.60846	2.21811	2.15673	5.0603	5.58732	5.78938	2.08016	3.41215	1.7995	3.21915	2.99921	2.584	8.47328	7.89269	7.31444	4.76866	5.72292	5.64757	2.86083	1.72165	2.58998	5.15263	3.8409	5.94244		0.436538	0.530832	1.00602	-2.26795	-0.215346	0.153778	0.677311	1.36833	-0.020965	0.0944251	0.423854	-0.437257	-1.7289	0.622169	-1.40312	-0.389114	-0.376083	0.357788	-2.95975	-1.06652
7	3.74773	3.6916	1.57877	1.3341	2.92458	3.7215	2.23245	3.64302	5.50085	6.03867	2.93919	2.17154	3.12396	2.11284	3.41225	3.20792	6.58428	8.42654	6.99926	5.3868	4.92277	4.74415	2.85233	-0.0441805	3.08075	4.87788	3.24428	5.89466		1.26381	-0.234304	0.872095	-1.1013	-1.93932	0.437952	0.158874	-0.411812	0.121808	0.438166	1.00692	0.761135	-0.646139	1.04482	-0.959875	0.376349	0.904677	-0.264933	-2.03158	-0.784169
8	2.63342	2.08205	0.343215	2.30127	3.47025	2.2003	2.63601	3.94577	5.00934	5.65474	2.13292	2.88295	2.63589	2.84888	2.40293	2.55835	8.0422	7.19529	7.0006	6.00176	5.64925	5.13961	3.72189	2.502	4.01822	5.75374	3.97197	2.43992		0.215609	-0.896047	-0.0972559	-0.200026	-0.670775	0.255153	-0.196526	1.57172	1.01712	0.392419	1.50272	-0.743726	-0.467665	0.762008	0.165915	0.621302	-0.152242	0.428897	-2.09891	-0.962538
9	3.97607	4.06681	1.39714	0.94177	2.21307	2.47708	2.52715	4.38845	4.74417	6.16948	3.06187	2.67382	2.99011	2.86263	2.38181	2.44055	6.14423	8.05689	5.11819	4.737	6.53716	4.92712	3.21848	1.37915	3.62459	4.04778	2.9114	5.57156		0.17189	0.665867	1.16089	-0.809236	-0.987213	0.740765	0.0669856	0.325048	-0.202861	0.687224	0.462207	-0.937168	1.19249	1.00268	-0.183411	-0.642871	-0.816411	0.445936	-1.79609	-0.0778276
10	2.87866	3.32436	1.2146	3.94965	2.3515	3.02013	2.94129	4.78177	4.65435	4.84631	3.15159	3.1195	2.34476	2.79537	3.08871	2.36302	7.63051	7.41467	6.08812	5.78114	6.4822	4.34432	2.41081	2.28537	3.37428	4.91292	5.45569	6.14398		0.866015	0.420483	0.56985	-1.13738	-0.867643	-1.65185	0.605013	-0.287305	1.45333	0.372514	1.0254	-0.492839	-0.533432	0.262346	-1.30137	0.297813	-0.54731	-0.47199	-1.25217	0.0922761
11	3.00652	3.51011	1.47776	1.00144	3.56846	2.96094	0.927686	4.53857	4.98015	4.95394	3.05664	2.86796	2.3234	2.83722	2.7539	3.01479	6.60021	5.85601	6.1701	5.96619	5.13866	5.56449	2.2527	1.04359	3.20417	4.35092	3.5527	5.36621		0.824367	0.243353	0.0542215	-1.64296	-0.292807	-0.323575	0.437654	-0.103621	0.208344	1.32416	-0.173861	-0.553859	0.494615	0.935216	-0.332906	0.47415	-0.128998	1.83135	-2.21381	0.645536
12	3.48841	2.93016	2.06163	2.18562	3.50205	3.2308	2.88565	5.52007	5.39171	4.55644	2.54488	3.72695	2.07673	3.12547	2.20478	2.08929	7.61908	7.99989	6.69276	4.73759	5.80729	4.75558	3.25732	1.51276	3.39764	4.14116	3.79722	4.51022		1.43478	-0.685242	1.21152	-1.03722	-0.464647	-0.249646	0.341735	-1.40888	-0.16829	-1.20689	0.440366	0.364743	-0.52679	0.743298	0.0170304	-0.414828	0.30796	0.654123	-2.3146	-0.830834
13	3.65908	3.50149	2.35014	1.91812	1.50862	3.40953	4.16131	5.16432	4.49732	4.94755	3.59821	3.48841	3.08445	3.50592	2.99469	2.22228	7.45277	7.37259	6.43736	5.35019	5.14611	5.08739	2.92142	1.75411	3.79014	3.66978	3.81515	5.35978		0.511713	-0.497305	1.2506	-2.12843	-0.830766	-0.262165	-0.390084	-0.883841	-0.810836	0.0963866	0.525172	1.20382	0.251518	1.04324	-0.251725	-0.157072	0.788041	0.478851	-1.82715	1.06513
14	3.35338	2.74125	1.58155	2.93283	2.78844	3.19856	3.25232	4.77511	5.16332	4.35565	3.16633	2.5582	2.47433	1.58113	1.78071	2.9859	7.27763	7.59458	5.53381	6.18563	5.35178	5.47146	3.28932	2.69606	3.22261	5.11254	4.15429	4.38613		-0.608697	-0.137057	1.36509	-0.231985	-1.90325	-1.37973	0.263283	1.14246	0.623935	0.127028	-0.565219	-0.177737	-0.27133	-0.110832	0.436688	0.145811	-0.341197	0.808513	-2.51748	-0.613649
15	3.71984	2.57187	1.3914	0.406517	3.17536	3.41597	1.81951	5.58737	5.57401	4.70691	2.89113	2.49632	2.54867	2.3065	2.42508	2.30701	7.94181	8.35567	6.1314	5.04409	6.15049	5.52527	2.0734	2.48748	2.89978	4.5738	4.57045	4.40301		1.49733	1.1083	1.0013	-1.52274	-0.374277	-0.429017	-0.142348	0.575294	0.876856	0.367784	0.720922	0.575875	-0.965783	0.758375	-1.08684	-0.0158333	-0.868668	0.61662	-1.72066	1.39771
16	3.35685	3.40773	1.5847	1.44724	3.57432	1.45134	2.01196	5.2972	5.49603	3.68717	3.03822	1.72756	2.81931	2.52951	3.197	2.93488	7.66903	6.73758	7.83348	6.28671	6.01891	4.59299	3.08147	2.28121	3.80814	3.82663	3.40106	6.07479		-2.06964	-0.0430604	-0.0708035	-2.08833	-0.557187	-0.351832	-0.519091	0.0653356	1.02874	-0.506543	-0.616436	0.354063	0.953847	0.845905	-1.35222	0.0858036	-0.875408	1.52533	-0.688567	-0.411001
17	2.73483	2.99909	1.66176	2.29464	2.13994	3.12687	3.27379	4.47831	5.43743	5.92943	2.55774	4.78416	3.27494	3.67707	2.86544	3.12442	7.77282	7.79429	7.51275	6.04484	5.81596	5.04536	3.12522	2.46759	3.41879	5.0578	4.08955	4.46972		0.675142	0.425819	-0.326657	-0.754067	-0.901011	-1.68756	-0.212242	-0.737882	-0.275868	-0.467739	0.986597	0.540769	0.184585	-1.07802	-0.999393	0.0232786	1.44875	0.436752	-1.27031	0.240572
18	2.36871	1.72792	1.70396	3.28506	3.38285	2.08166	2.05533	5.83389	5.09003	4.9846	3.2738	2.92363	1.90015	3.33429	2.62039	2.95974	7.94871	7.77105	4.80217	5.17034	5.18135	4.97879	3.34171	2.18968	3.32317	4.86114	4.28211	4.02382		0.387124	0.54422	-0.390824	-0.247464	-0.866633	-0.00815012	0.912547	1.83939	0.552958	0.394957	1.12693	0.614173	2.16259	0.988324	-1.37135	0.264259	0.566458	1.3362	-0.859544	0.81099
19	2.86426	3.43232	1.42584	2.21187	4.55775	2.1529	3.48017	6.17423	3.56159	4.87058	3.89786	2.91025	2.70671	3.31672	2.65568	3.19587	7.21286	8.57013	6.59079	5.85197	6.00782	4.81581	2.50816	1.86685	2.96984	3.91881	3.66306	4.94618		-0.087972	-0.620038	0.487866	-0.0700983	-0.687457	-1.62189	0.392856	-0.607595	0.697772	-0.282444	0.940031	0.840068	0.790806	0.932149	-0.47756	-0.837137	-0.879951	0.182797	-1.31372	-0.772577
20	3.67731	3.84993	1.36216	2.76181	2.14089	3.35706	2.20825	5.00443	4.24666	4.22082	4.01019	2.7243	2.59391	2.32995	2.80812	2.53626	5.60315	6.72677	5.82953	6.18892	6.04751	5.66729	3.01971	1.8447	2.77576	3.89071	2.96591	4.87031		0.379489	0.175534	1.97096	-0.996631	0.275357	0.624488	-0.496524	-0.362673	-0.476435	0.613358	-0.541278	-0.205518	0.483724	1.66648	-0.613766	-1.33093	1.5116	0.226453	-0.939688	-1.20385
21	3.07163	4.08046	1.96845	0.962538	3.77249	3.33982	2.87639	5.21665	4.88521	5.23134	2.59764	2.47449	2.95085	3.01069	2.72594	3.11676	5.93226	7.85412	5.33635	5.78546	6.80693	6.32984	2.92491	2.81425	4.62014	4.34705	3.35447	5.40957		-0.190063	0.364968	0.758957	-0.0426849	0.600919	-0.825273	0.471663	-0.0119773	0.277789	-0.940205	0.450992	0.491597	0.072854	-0.400219	0.471364	0.0238875	-0.152018	1.73492	-2.0563	0.641145
22	3.34568	2.34382	1.45766	2.41716	3.35503	2.72131	2.81701	5.41984	5.16144	5.53586	2.81013	4.06576	1.974	3.17447	2.91876	2.97635	7.07073	8.63567	6.77316	6.43408	6.25624	4.9463	3.9733	1.13711	3.35435	2.66352	4.63833	5.55049		-0.782911	-0.061775	-0.267715	-1.53327	-0.656373	-1.14433	-0.946305	1.52992	0.319444	0.844717	0.661123	0.838428	-0.304077	0.172631	-1.00574	0.109495	1.14162	1.29534	-0.669008	0.0524983
23	4.02323	2.10016	0.840593	3.18675	2.37967	2.97962	4.14135	4.8811	5.08939	4.90537	2.55821	2.41373	3.18824	2.35811	2.85662	3.53013	7.27708	7.99939	6.55822	5.966	6.65501	5.52461	2.87286	1.95214	3.43014	4.29038	4.28179	5.6353		0.0906372	0.503817	-0.61556	-0.965217	-0.629586	-0.849491	1.79641	0.29495	-0.566086	-0.127077	1.22996	0.338828	-0.234504	0.152909	-0.765728	-0.600458	-0.975127	0.81517	-1.22907	-0.518806
24	3.42327	2.33912	0.353295	2.71059	4.45201	3.22788	1.76157	4.04591	5.03359	5.04382	3.76486	3.26373	2.53145	2.90956	1.28373	2.97715	6.65693	7.77581	5.73053	5.53982	6.15449	5.37418	2.42605	2.79814	4.16105	5.14703	2.58613	4.33937		0.6236	-0.148539	0.705226	-1.67321	-2.14234	-0.821444	0.465232	-0.232941	-0.392675	1.43917	0.975189	-0.12866	0.964055	0.302674	-0.133172	-0.479878	0.376861	0.677188	-0.340929	-0.629311
25	2.75198	1.96368	0.476309	2.65752	3.93909	2.77143	3.63613	5.51646	4.80531	5.34231	4.0274	2.73973	1.95147	1.97064	3.08957	3.12866	6.14174	7.29423	5.47666	6.17957	7.38951	5.26144	3.06893	2.33694	3.27823	4.14913	3.24083	3.91606		0.947337	0.301893	-0.236551	-2.35521	-1.62529	-1.79061	1.02593	-0.712355	-0.867698	0.726311	0.211784	0.793067	0.616907	-1.33725	-0.85041	-2.10396	0.0690494	0.852993	-1.76194	0.250833
26	3.45742	1.97283	0.445435	0.819772	4.28119	2.92568	1.86083	4.54995	4.22654	5.75688	1.01816	3.61119	2.45843	1.03793	2.76084	2.33045	7.12417	7.39794	5.54733	4.96292	5.14507	5.35848	2.39358	2.67033	3.22527	4.11611	3.17964	3.6942		-1.30316	-0.640906	1.20677	-0.837724	-1.05973	-0.828462	1.09848	0.585137	0.811793	0.516342	1.53076	0.77211	0.267145	-0.00340923	-0.674261	-0.401894	-0.173791	0.548817	-2.73285	-0.115987
27	2.97695	2.19628	1.93911	2.66188	4.12768	2.69936	2.36088	3.11071	4.37384	5.46129	2.15389	2.41171	2.98558	2.11051	2.2089	2.48759	7.1856	6.30116	6.85415	6.33558	6.21833	5.14135	2.70798	1.59344	1.36428	3.25295	4.22353	5.29012		-1.57719	-0.650305	-0.0644676	-0.518886	-1.9611	0.890382	-0.599756	-0.0580087	-0.353222	0.707918	0.819201	0.26648	0.226535	-0.0216986	-0.539925	-0.910065	0.520021	0.881036	NaN	-0.306323
28	3.53385	3.96505	0.808599	0.514274	3.72809	2.2971	2.27429	3.49181	4.74302	5.43733	2.47329	2.73567	2.3093	3.48493	1.73155	2.63526	5.69519	6.98003	5.67356	5.37968	5.96659	5.04744	2.40313	0.956811	2.58866	4.69974	3.84121	5.17876		-0.366398	1.28882	0.82037	-1.38805	-0.785024	0.0455174	-0.872654	0.0426521	1.53421	0.870047	0.42024	0.524093	0.183329	-0.0758953	-0.854142	-0.901599	1.48928	1.47288	-1.70798	-0.464571
29	3.55878	1.59813	0.855469	2.17293	3.91093	3.53359	1.69904	3.89798	3.90697	4.33834	3.55175	2.5212	2.37214	4.01998	2.94688	2.34913	7.81336	7.13681	5.99642	5.56729	4.43119	4.25367	2.84407	2.34991	2.33899	3.69187	4.3744	4.7695		1.36872	-0.0602838	0.776664	-1.35914	0.286895	-0.172603	-0.384411	0.22122	-0.5457	0.442257	0.856397	0.721938	0.39298	0.974488	-1.13336	-2.03476	0.207445	0.278414	-2.19782	-0.669478
30	3.16115	1.75907	0.372343	0.652782	2.07078	2.38066	2.46974	4.46283	4.22919	4.73516	2.2962	2.64113	1.983	2.34333	1.90949	0.983931	5.73249	6.82149	5.52247	5.63516	5.07958	4.66089	2.03034	0.755664	3.00004	3.83844	4.08071	4.02025		0.353862	-0.26668	1.63016	-0.98533	-0.082086	0.6788	0.784753	-2.15619	-0.39497	-0.0107538	0.976532	0.433353	-0.2954	0.746508	-1.0761	-0.630217	0.959608	0.836129	-1.27668	-1.38896
31	2.57086	2.89151	1.3996	1.75795	2.86593	3.27113	3.21342	3.83191	4.44518	5.47517	3.32686	2.01899	1.75437	1.25462	2.08134	2.17689	6.55623	6.06798	5.70205	5.95657	5.74905	4.54381	3.22044	1.23552	2.79157	4.15332	3.08801	4.93322		-0.377425	-0.247962	-0.495033	-1.31872	-1.05083	0.853156	0.523753	0.133198	-0.119868	2.0852	1.69024	-0.289232	0.11118	0.763972	-2.3218	-1.3901	0.491525	0.431847	-1.86954	-0.415454
32	3.06462	1.70981	0.476937	4.38015	1.97169	2.13261	1.25911	3.0848	4.70894	3.83285	2.34821	2.00548	1.77247	2.75843	1.82141	3.35797	7.11648	7.13727	6.82638	5.34469	5.42277	5.17385	2.02869	0.0469768	2.15091	3.38341	4.57726	4.62997		-1.11623	0.936532	0.591712	-1.16762	-0.174374	-2.36419	1.43502	-0.502628	0.769714	0.78153	0.217944	0.192927	0.536976	-1.39475	-0.496968	-0.780061	-0.443564	1.09552	-1.94061	-0.390733
33	1.89707	4.53784	1.10917	2.79148	2.63671	2.002	2.08822	4.2686	4.75185	3.92081	3.55359	1.76452	2.08045	3.12872	2.14559	2.50249	5.7473	6.47838	5.11878	6.65913	4.35906	4.42171	2.17543	0.791035	2.78004	3.12036	3.38158	4.43585		-0.670947	-0.765318	0.889232	-1.15379	-2.54746	0.880476	0.742602	0.789829	-1.02984	0.165541	1.30808	-0.515321	1.03511	0.926369	-0.532027	-1.06459	0.315144	0.277008	-2.11548	0.448878
34	3.4689	2.24631	1.59904	3.13316	0.84707	2.03851	1.53136	2.77238	4.41363	4.38396	2.56284	2.50855	1.79016	3.03944	2.62196	1.8126	6.25091	7.11634	5.63958	6.31401	5.03007	4.9035	3.58571	1.07592	2.64026	2.28601	2.74779	4.82123		0.435894	-0.688239	-0.660751	-0.198502	-1.36604	-1.58179	0.0359252	-0.137768	0.35733	1.28243	0.764718	0.354249	0.537884	-0.0600821	-0.5159	0.191129	1.24177	1.21314	-2.18453	-0.447652
35	2.02386	2.3826	1.48772	-0.308644	2.09278	2.03389	2.3364	3.04822	3.88725	3.73933	3.60499	2.86237	2.76252	2.923	2.35003	2.16156	5.84839	5.92745	5.21453	5.42848	4.30741	5.00667	3.03975	0.986219	2.85998	2.65308	2.72838	4.34839		-0.0243006	-0.532573	1.90671	-2.0541	-0.0801728	-0.119774	0.54957	0.223354	-0.551225	0.536039	-0.737308	-0.680045	1.47754	0.590324	-2.26843	-0.535277	0.0677711	0.16504	-1.54826	0.185068
36	3.04467	3.13962	1.37235	2.55314	2.9744	2.46153	1.72045	4.61888	4.24456	4.71996	2.51545	1.07561	2.6753	1.55794	2.15078	2.12677	6.50182	6.35611	5.84202	5.36389	5.01928	4.62686	3.34172	1.38746	2.60587	3.06284	3.90941	3.86186		-0.320739	-0.363169	0.452802	-0.922065	-0.931446	-0.540644	0.191209	0.299191	-1.35275	-0.0585037	0.816855	-0.884251	-1.03159	0.0550886	-0.713234	-0.636216	-0.828723	0.531796	-2.31057	0.284156
37	3.80424	3.14978	0.803271	1.25937	2.27622	1.45904	2.13397	3.26911	3.31527	5.09161	4.06612	1.14699	1.59448	2.79589	2.40246	2.03292	5.45067	4.69969	5.10995	4.56722	3.64004	3.47044	2.6237	1.41442	1.32358	4.41553	3.61818	4.95254		-1.77231	0.235029	-0.245043	-1.4076	-1.02962	0.631267	1.43705	-1.09681	0.98294	-0.0582974	0.138593	0.0902004	-0.760549	0.57939	-0.171102	-1.48766	-0.516626	0.177332	-1.70887	-0.616935
38	3.33594	2.00638	1.18984	1.82556	3.44741	2.96211	2.18612	3.896	4.00965	3.07745	2.18451	2.81378	1.88579	3.07432	2.30775	1.85177	6.0909	5.45852	4.74423	4.35191	5.35276	3.91149	2.27079	1.22802	3.12071	2.67904	3.59906	4.37526		0.020705	-0.257064	1.22601	-1.61654	-0.915915	-2.41235	1.00742	0.665993	0.577469	0.397908	1.52573	0.694572	-1.03755	-0.57765	-1.84874	-0.551198	1.06953	0.261286	-1.67822	-0.528681
39	1.99907	2.26453	0.222627	0.808321	2.41021	2.05579	1.69782	3.97576	4.00229	3.88251	2.64975	2.07459	1.31002	2.63074	2.13446	1.92602	5.26618	6.29739	5.59469	3.98579	5.44415	4.48359	2.24168	1.7214	2.87034	4.22226	3.24578	4.36053		0.51281	-0.556961	2.07349	-2.17363	-1.62156	-0.890804	1.04381	-0.621826	0.978405	0.536325	0.892963	-0.204726	0.893847	-0.309323	-2.52805	-1.81949	-0.283768	1.31239	-1.39833	-0.179982
40	2.68078	2.39383	0.0793818	2.86806	0.927857	2.93794	2.75037	3.53217	3.8841	4.10833	2.70652	1.70083	0.904268	1.67001	2.19695	2.20934	4.95641	5.75841	3.77814	4.66729	5.38196	4.06269	2.43563	0.891715	2.53213	3.53802	2.95981	4.01029		0.374267	-0.396126	1.19066	-1.18985	-1.88896	-0.36369	0.597028	-0.435758	-0.387274	0.0956791	-0.327805	0.175772	-0.368963	-0.272475	-1.44342	-1.19305	1.66906	0.83247	-1.4376	-0.257787
41	3.11193	1.61693	0.230663	1.95222	3.275	3.55465	1.76548	3.43186	3.32032	4.09518	2.93292	1.44509	0.862292	2.2375	2.12352	1.50543	6.37124	5.41217	4.84385	3.90601	5.27244	4.47449	1.53943	1.40284	2.21241	1.74217	2.60725	4.44631		-0.133773	-0.0982164	0.20559	-1.96973	-1.38919	-0.519793	0.922445	1.00964	0.527732	-0.367328	1.13754	1.42419	0.78314	1.00669	-2.72399	-0.775363	-0.304179	0.762952	-1.45762	-0.922059
42	2.13055	2.59619	1.00907	-1.65433	3.51205	2.51534	3.01008	4.48708	3.21648	4.59839	2.46595	2.32572	1.40522	2.71881	2.18286	1.14815	4.93882	5.81472	5.70744	5.5297	4.78935	4.17373	1.32257	0.666333	2.98603	2.08839	3.47185	3.85693		0.230181	-0.494551	1.31277	-1.48645	-1.66063	0.257966	-0.0209645	0.950319	0.640426	0.483832	0.208941	-0.0666995	0.863925	0.764339	-0.417925	0.0783433	1.29063	0.732991	-1.84297	-0.558236
43	1.67233	2.67558	1.65666	1.26714	2.66265	1.98356	1.0689	3.14858	3.34264	3.75656	2.58637	1.98062	0.912364	2.23632	2.28237	1.67464	4.58086	5.31151	4.86044	5.14585	4.77197	5.03777	2.23596	2.23387	2.46333	3.99834	3.78656	4.06242		0.59685	0.276491	1.34825	-1.03385	1.1265	-1.18464	-0.965231	-1.13046	0.397044	0.279	0.427732	0.840869	-0.773999	0.993634	-0.192222	0.0284636	0.278424	0.478511	-0.815308	-0.913708
44	3.03189	2.57171	0.703015	2.70004	3.94596	3.12611	1.27842	3.19304	3.63991	4.31515	2.54361	2.35655	1.83659	3.16858	2.19682	1.27822	4.38975	5.17084	5.95501	4.80769	4.82247	4.15858	1.49603	2.03108	2.95248	2.91638	2.78384	3.89615		0.189608	-0.717844	0.647357	-1.81981	-1.15445	-0.451466	0.52792	0.591391	0.234159	-0.281419	1.2944	-0.0360654	0.0980839	0.809683	-0.0276937	-1.70238	1.3444	0.549062	-1.07661	-0.23874
45	2.98666	0.844321	0.204776	2.59886	3.46636	1.84848	2.94694	2.96597	3.9788	4.4322	3.73114	2.20278	0.180132	1.82459	2.40832	2.3414	5.26761	5.52797	3.59931	3.1236	4.20446	4.46861	2.74062	1.25785	1.17609	3.12833	2.99899	4.078		-0.223615	-0.335067	0.156919	-0.706386	-0.220968	-0.371909	-0.499812	-0.725143	0.026323	1.24487	0.809622	-0.00654105	0.395335	0.28067	-1.91184	0.532717	0.247837	0.743934	-2.72364	0.16908
46	2.57467	2.14994	1.38342	1.45672	1.77842	1.92495	1.96421	2.85243	4.02382	3.22607	3.11928	1.19728	1.43186	2.57588	2.44904	1.54387	5.18675	5.50923	4.9334	3.0114	5.00694	3.47228	2.50769	0.769069	1.97326	3.89231	2.32199	3.90815		-0.366181	-1.1399	1.19509	-2.30208	-0.291145	0.203658	1.22609	-1.07865	1.015	0.104491	0.70681	0.42768	0.436354	0.206764	-1.92555	-0.765166	0.347533	0.844283	-1.90775	-0.237227
47	2.53075	3.74011	1.43274	2.91501	3.26044	2.86859	2.22089	3.70667	3.94395	3.15816	3.00727	2.49357	0.826176	1.86872	1.54974	1.55878	5.11202	4.99773	5.05678	4.52285	4.73268	4.34513	2.38147	1.33111	2.36496	3.65938	3.50283	5.46089		-0.148542	0.146425	1.68526	-0.385802	0.754155	1.26609	-0.0271331	1.17719	0.249573	0.503229	0.380308	0.0137366	0.798256	0.201886	-0.681066	-0.92199	-0.100518	0.28869	-0.778364	-0.668309
48	2.43617	2.57854	0.795343	-0.0725536	3.27906	1.18223	0.827152	3.73518	2.14573	3.19181	1.67345	2.8423	1.15937	2.77397	0.981259	1.112	5.52262	5.02609	3.92387	3.86561	4.21178	4.40708	1.26506	1.68598	2.66168	2.44568	2.58066	3.56641		-0.447811	-0.281581	1.09989	-0.0836193	-0.793941	0.64529	0.644923	-1.58078	-0.195442	0.658558	0.333988	-0.403078	0.387252	1.4939	-0.333954	-1.29775	-0.755356	0.411663	-1.69424	-0.91823
49	2.59829	2.00987	0.803761	1.56302	2.38268	1.29533	1.89445	3.24955	2.658	1.90201	2.94408	1.46594	2.14956	2.42632	2.26496	0.776373	5.16501	5.5434	2.76277	4.09167	4.9675	3.73937	1.68496	1.0575	2.30786	3.31828	2.65947	3.71922		-0.134379	0.285611	-0.0529992	-1.61883	0.0124929	0.0744333	-0.217595	0.66988	-0.639846	-0.390565	0.75848	0.00881188	0.926665	1.05645	-0.579554	-0.0263397	0.432406	-0.0685764	-1.44512	0.654272
50	2.53193	1.65944	0.749448	1.17462	2.55722	2.65146	1.35091	3.81339	2.98676	3.60307	3.08419	1.20691	1.39303	2.21459	1.65678	1.96498	5.68626	6.42382	3.78355	4.44167	5.46751	3.14236	1.70852	1.96717	3.06959	2.53821	3.12904	4.5925		0.10089	-0.224041	1.14195	-0.991104	-0.125452	1.34883	-0.445076	-1.31206	-0.190571	1.30672	0.0662033	-0.0257188	0.786625	0.118201	-1.98154	-0.391603	0.0275301	-0.729984	-1.28438	0.00322899
51	3.26987	1.12444	0.852808	2.87914	1.40645	1.87229	1.79259	2.5297	3.62229	2.4642	2.64918	1.52636	0.975881	2.54409	2.39637	1.08093	4.87875	5.48097	4.68028	3.64262	3.7621	4.20812	2.66615	0.68228	2.43469	2.55044	2.84327	3.37861		-0.162846	0.683686	1.66366	-2.60101	-0.34315	0.0854196	-0.0263617	-0.202621	-0.429598	1.10206	-0.607747	-0.382992	-1.32615	0.938115	-0.605352	-0.504699	0.281675	-0.431259	-1.06957	-0.434721
52	3.10374	1.81656	0.496862	1.41661	2.8138	1.52851	1.51189	3.62785	3.15782	4.37005	2.5766	1.6727	1.75781	1.95214	1.14078	1.67533	5.18858	4.33192	4.07684	3.86709	4.03789	3.92926	1.33263	0.175186	2.2932	2.29603	2.46635	4.62064		1.08942	0.0641838	0.744106	-1.0001	-2.51618	-0.622556	0.58292	-0.781554	-0.282567	0.136283	0.788617	0.342341	-0.105808	0.084566	0.0894306	-0.417066	0.869469	1.42927	-2.63096	0.29192
53	2.80885	0.211292	0.430573	3.27975	1.88469	1.12365	1.70412	1.63653	3.44388	2.41408	2.55484	1.18855	2.05051	2.13623	1.89173	1.09507	4.97965	4.57595	2.16166	3.43618	3.33366	3.6542	3.2712	-0.3757	2.98653	3.45387	2.27314	5.74186		-0.17683	0.404574	0.824986	-0.819098	0.661609	-1.18085	1.32033	-0.0248155	0.501677	-0.0902603	0.296596	0.600266	0.023297	-1.41754	-1.32007	-1.00138	1.49021	0.885344	-0.718569	0.188522
54	3.10516	0.544576	1.01269	0.0985732	2.1544	1.701	2.48765	2.32302	3.56628	4.2047	1.48583	1.38152	0.445849	2.61214	1.37241	0.593563	4.21083	4.34449	3.045	3.1466	2.30665	3.27707	2.60848	0.817717	3.62122	1.53385	3.05853	2.11161		-0.116392	0.720475	1.06147	0.160026	-0.101029	-0.231984	0.657747	-0.655101	0.321124	0.596862	1.1099	0.130593	0.0514516	1.17585	-1.2959	-1.84555	0.631734	-0.0530209	-0.965204	0.444598
55	2.51054	2.45174	1.77683	0.830772	1.4684	1.92355	1.54986	3.31955	2.68628	2.72398	2.80981	0.352852	-0.174442	1.71109	1.29131	1.4146	4.14879	5.12195	3.47025	3.9031	3.73951	3.77076	1.2435	0.642738	2.5725	3.04711	3.15215	4.30465		0.213681	1.4237	0.947272	-0.307303	0.829946	-0.117726	0.303704	-1.0625	-0.505301	-0.511335	0.217393	-0.523534	-0.602397	0.80812	-1.79224	-0.189259	0.42254	0.00186234	-2.50276	-0.0563776
56	1.57118	2.1988	1.43523	1.45178	2.33414	2.03935	1.61021	2.16514	3.15894	2.82018	1.24659	0.718466	0.481897	0.894161	1.92153	2.17996	3.75467	4.45989	4.65421	2.65559	3.7287	3.56572	0.97856	1.08156	1.32421	2.26788	2.96223	4.32517		0.199551	-0.233737	0.832442	0.336854	-0.216002	1.40452	0.697131	-2.07609	0.685719	-1.02505	0.489184	-0.615581	-0.00197623	0.767003	-1.86761	-0.219626	-2.41469	-0.0293852	-1.84654	0.468775
57	3.04711	1.37959	1.48686	2.28107	3.00896	1.72986	1.21082	3.57982	2.5813	4.30957	2.29629	1.18551	1.23711	2.6617	2.06122	1.32643	5.72672	6.20941	2.8568	3.18398	4.24618	3.57211	2.06565	-0.159477	2.69916	2.9163	2.40602	3.72211		0.946252	0.69044	-0.181975	-0.83508	-0.364808	-0.601985	0.723348	0.24047	-0.93614	-0.0374425	0.315257	-0.051516	0.291894	0.0930111	-0.670743	0.374082	0.281557	0.976347	-0.801402	-0.320003
58	1.39683	0.633476	2.33068	0.738995	1.84238	0.856719	1.54956	3.09156	3.77462	3.33512	2.13577	1.22561	1.29995	3.16859	1.90647	2.03468	3.9545	4.01935	2.71931	3.72748	2.89253	3.16391	1.6064	-0.332684	1.56074	3.12459	2.19557	5.06657		0.726762	-0.519135	0.781214	-1.53153	-0.618269	-0.305372	0.841366	0.368463	0.67872	0.167515	-2.14173	-0.253196	1.05421	2.08161	-1.19163	-0.598065	-0.0675666	-0.238785	-1.33857	-0.23022
59	2.00494	0.79573	0.979615	1.14603	2.27707	2.13706	0.502666	2.80955	2.60276	2.33012	3.14283	1.27282	1.921	2.16318	1.76885	1.97614	5.47325	4.51583	3.65373	4.78163	2.65717	3.0229	1.15539	1.3238	1.45144	3.36	2.83708	2.69271		-0.588188	0.366467	1.11435	0.256218	-0.090921	-0.385157	0.147946	-1.11918	1.12567	-0.453064	0.75533	-0.521918	-0.103044	1.20256	-1.7384	0.284647	0.702835	-0.510325	-0.41966	0.717038
60	1.46978	1.10318	1.81222	0.259518	2.92277	2.93266	1.74291	2.1728	1.54441	2.29858	2.39142	1.12106	0.757127	1.8329	2.73853	1.86537	4.25471	5.97539	2.71592	3.26719	3.94812	3.40896	1.08423	-0.222575	3.1226	3.26755	3.84268	3.94413		0.357507	0.368496	-0.274655	0.456762	-0.330102	-0.914941	0.677874	-0.357511	-0.097359	0.63713	0.383467	0.913022	-0.123294	-0.805188	-1.77576	-0.305621	2.04593	0.402801	-1.79519	-1.06916
61	2.71279	1.39913	1.09923	3.5696	1.97553	1.56984	0.821389	2.43127	2.67569	2.13235	2.10246	1.07633	1.05208	1.94102	1.30688	0.417803	4.46989	4.23776	3.65168	4.02196	4.15878	2.84146	0.880644	0.413859	2.68017	2.14215	0.890874	1.65377		0.873578	0.338353	-0.979209	-1.32993	-0.734456	0.0699487	0.505033	0.0722312	0.305176	1.12654	-0.338089	-0.0586431	0.496155	1.31398	-1.43378	0.080413	0.658833	-0.381063	-2.34021	1.08484
62	2.70229	2.70698	2.86043	1.34625	1.45481	1.11986	1.47354	2.16081	2.97116	2.68698	2.05704	1.90888	1.60805	2.03573	0.962481	1.42263	3.70134	5.09058	4.46388	2.4027	3.81	3.61619	1.23861	0.878577	2.04998	1.42829	2.7615	3.77457		0.561791	0.170293	0.215806	0.0980764	-0.502588	1.52108	0.974267	1.2707	0.542541	0.781818	0.104009	-0.289828	-1.22126	0.176696	0.0968929	-0.762578	0.33497	-0.192588	-1.4835	0.209328
63	1.5223	0.27517	1.07849	1.40653	2.32518	2.05596	1.05944	2.50281	3.58393	3.03437	1.47957	1.91112	2.11723	1.83158	1.91088	1.05472	4.12079	3.89501	2.91418	2.72583	3.7727	3.14249	2.26916	1.41636	2.17475	1.60161	2.23185	3.00248		0.772519	-0.0259621	-1.54382	0.124254	0.598817	0.786441	0.609157	0.332556	-0.553865	-0.0495221	0.958716	-1.21973	0.336458	-1.07674	-0.645691	0.0888054	-1.0913	0.968657	-2.63095	-0.832084
64	3.05524	1.52727	2.38941	-0.116662	2.31836	2.25789	0.824917	1.68826	2.87304	3.45801	1.8051	0.671137	0.5685	1.0735	0.779222	1.12399	3.61941	4.23072	4.42815	3.95636	3.21376	2.40433	1.42908	1.83315	2.59072	1.48743	2.73379	2.52784		-0.23807	-0.164223	-1.62594	-1.21592	0.396661	-2.14323	0.478953	-0.739738	-0.0685563	-0.619878	0.211998	-0.264403	-2.09045	0.780169	-0.661704	-1.40784	-1.17458	0.406777	-0.916548	-1.46714
65	2.80517	3.38769	1.07715	0.0624121	2.0848	1.78413	1.93517	2.6441	1.80597	2.43955	1.93021	0.881274	0.690798	2.83109	1.58175	0.563269	5.09788	5.0775	3.537	2.36663	3.30163	2.41576	1.24662	-0.360113	0.719015	3.18144	1.71081	3.59748		-0.98147	0.41703	0.330806	-1.19755	NaN	-0.938292	0.442541	-0.00713885	-0.401571	-0.0709408	0.998531	-0.436699	-0.437319	0.86186	-1.38929	-0.111714	0.264415	0.185393	-1.1202	0.246407
66	2.02538	1.69779	2.20806	0.45027	2.43586	1.2982	0.620753	2.17745	2.41427	3.2621	-0.88208	0.340718	1.55137	0.963216	1.02781	1.23273	4.30713	5.01386	3.07939	3.1613	3.22973	3.36023	1.13113	1.8756	3.0645	2.15962	2.82365	2.79838		0.722744	1.19363	1.56583	-0.177801	-0.81809	-1.31819	0.480042	1.01986	-0.0242257	0.397638	1.17733	-0.281485	1.05525	0.772563	-2.6033	-0.292301	0.344316	-0.139042	-0.805857	-0.888447
67	2.36724	2.62833	1.85281	0.377324	2.27224	2.47078	2.12774	2.38908	2.74605	3.55103	2.1906	1.25607	1.96169	1.95253	2.1535	2.14237	3.81245	4.09605	3.65863	2.78005	4.03577	4.29208	0.758795	0.473325	2.12285	1.81793	2.53998	3.96353		-0.11551	0.390976	0.204053	0.0155007	-1.25051	-1.04038	-0.631344	0.151463	1.04764	-0.446511	1.01922	-1.24352	0.0316308	0.459892	-1.85706	0.21925	-0.254394	0.50375	-1.54718	-0.249819
68	2.09123	1.50842	1.10805	0.936408	1.77835	2.1119	0.919704	2.10595	1.98083	2.66333	1.44323	0.0218072	1.39174	1.70158	1.09041	0.781875	4.32324	4.56277	2.56257	3.08996	3.4123	2.77627	1.62795	-0.534713	2.31443	2.28782	1.2984	-0.848208		0.606986	-1.46674	0.328007	-1.88654	0.399701	0.213447	0.742734	-0.105802	-0.594044	0.61912	1.04487	0.235407	-0.573147	1.09535	0.0605822	-0.118142	0.727038	1.1035	-1.40228	-0.546493
69	3.33896	2.25687	0.873775	2.0915	2.21045	2.79346	-1.20042	2.75887	2.66879	3.94485	1.57414	1.66955	1.29105	2.25478	1.64776	1.39531	4.16015	4.43323	3.26324	2.69072	4.06903	2.78155	2.37748	-0.383988	1.12012	2.29929	2.30777	2.85319		-0.00958253	0.597984	1.31589	-0.401961	-0.115806	-1.07562	1.91538	-0.141814	0.0971949	1.0544	1.05301	0.302425	0.220544	0.74311	-1.73686	-0.619787	0.351889	0.461447	-1.38279	-0.110745
70	2.26031	0.661275	-0.0687085	1.72705	0.644113	1.81461	1.41111	2.60443	2.58434	2.75439	1.26517	1.49477	0.379035	1.95336	0.549463	1.97591	3.58049	4.97727	3.82389	2.89663	2.34514	3.14225	1.22973	1.03224	2.39055	2.03588	2.68524	3.09243		-0.071466	-0.586397	-0.779527	-0.954782	-1.31598	0.588068	0.599168	-1.03007	-0.962853	0.374256	1.15945	0.330946	-0.376645	0.963012	-1.0984	-0.47442	-0.573267	0.660011	-0.603833	-0.0465049
71	2.71227	0.761441	-0.268981	3.22064	2.46205	2.17893	1.11287	1.28653	1.76684	2.56413	1.58711	1.22053	-0.444761	1.49283	2.35785	1.6998	4.4016	4.22937	4.06398	2.44641	2.05449	1.24907	0.990356	0.325843	2.70731	2.07724	0.509809	3.23121		-0.510008	-0.409982	1.48914	-0.778968	-0.445633	-1.5826	0.439932	0.179094	0.204283	0.417338	0.341931	-0.0914145	-0.0807304	0.711549	-1.42001	-0.72721	1.3245	0.231736	-2.02912	-0.143164
72	2.21622	1.04979	0.0336572	2.39615	2.04065	1.63437	1.87304	1.60493	3.38097	3.52033	2.57933	1.70323	1.06752	2.29427	1.61064	1.04181	3.84345	3.78017	3.25357	3.08408	2.40149	2.24414	1.04062	0.949633	0.939114	2.199	0.51487	4.10078		-1.32308	-1.48813	1.2067	-1.35309	-1.10257	-0.101927	-0.660195	0.847468	-0.511506	-0.548673	1.13056	-0.106711	0.935751	0.413385	-1.06111	-0.545925	-0.39987	0.158327	-1.0632	-0.163153
73	1.93349	1.68303	-0.0664678	1.47026	1.89222	1.5375	1.87829	2.59923	3.27912	2.48123	2.4182	0.697577	0.193118	2.31512	1.6606	0.49849	3.5628	4.76644	4.29018	3.17054	3.84119	3.81225	1.92286	0.883067	1.2841	2.56553	2.49161	3.23164		-0.826992	-0.91851	-0.875863	-2.0391	-0.888822	1.69941	-0.786816	-0.274566	0.596415	0.876242	1.66746	-0.224075	0.331048	-0.709561	-1.3024	-1.89381	0.73081	-0.13107	-2.21821	-0.501579
74	1.30896	1.2612	1.09008	0.374114	2.69248	2.57028	0.984959	2.07758	2.19773	0.176163	2.26964	1.40123	0.499338	0.923749	1.22768	1.17632	3.91249	4.23111	2.56344	3.01975	2.08754	2.84506	1.75386	0.37967	1.52062	1.77027	1.87696	3.56319		-0.748394	-0.773625	0.441371	-0.654324	0.234954	2.08242	-1.1194	-0.918079	-0.138272	-1.24288	0.38839	0.268397	-1.27351	0.72956	-0.728807	-0.067241	0.541351	-0.242443	-1.47278	-0.818017
75	1.32702	1.11452	-0.389218	2.23638	2.57533	1.61192	0.629598	1.61222	2.43356	1.82201	1.35983	0.882073	0.933662	1.40095	1.38646	0.371701	3.0841	4.04569	2.60518	3.76845	3.66032	2.38322	0.829545	0.847329	1.90074	2.36457	2.47351	1.08524		-0.174861	-0.0905569	1.01364	-0.112042	-0.446921	0.483231	0.958303	-0.676488	-0.465598	1.59596	0.3778	0.435346	0.191832	-0.0661381	-0.750394	-0.611804	-0.725246	-0.212203	-1.24394	-0.392868
76	1.50806	1.40996	0.40217	2.11953	2.02578	1.5474	0.414229	2.44168	3.11565	1.78418	3.09215	0.62016	1.42711	1.37149	1.4373	0.628139	3.78068	3.10112	3.43011	2.69366	3.1586	2.23865	0.16622	1.55179	2.16711	2.00107	2.75024	3.50158		0.252835	0.19989	0.295826	-0.321643	-0.376794	0.144402	-0.305228	-0.527176	-0.299045	0.035925	0.47994	-0.294302	0.388279	0.760428	-0.545091	-0.500747	-0.0598555	1.40358	-1.998	-0.729498
77	1.60346	0.864106	0.46777	0.75104	-0.169398	1.63869	1.07631	1.97037	2.78062	3.41682	0.688497	0.404398	1.00938	1.42359	1.78823	1.40181	3.92333	4.72973	3.81572	2.06949	3.0414	1.57055	0.94972	0.413435	0.938509	3.09164	2.78873	3.49488		0.424152	0.556546	0.763758	-2.94171	-0.918358	-1.14738	1.60079	-0.660609	-0.365472	0.820579	0.127112	-0.375252	-0.651825	0.757833	-2.18627	-0.528259	-0.153031	0.605312	-2.02559	-1.0756
78	2.05111	0.0838279	0.302755	0.366276	0.934424	1.10451	-0.0553009	2.41076	2.87609	2.75163	3.25603	1.06887	0.771326	2.27369	1.353	-0.178951	3.77988	4.08249	2.79884	2.7167	2.25805	3.80751	1.615	0.281991	1.75121	2.42284	1.61233	3.44432		0.222427	0.53182	0.434987	-0.593294	0.687155	1.1371	0.391243	-0.277875	-0.234016	-0.0284552	0.308284	-0.738878	-0.282885	0.515486	-1.00279	-0.232156	1.25568	0.208374	-1.83462	-0.460662
79	1.87826	-0.217101	0.176817	-0.164743	1.60855	1.16332	2.19293	1.60627	2.12144	3.38593	2.80804	0.755668	-0.115183	1.79846	1.29612	1.55236	3.2393	3.61115	2.47399	2.67061	3.69052	4.05409	1.68841	1.21499	1.51932	0.965019	3.06737	1.74943		-0.635285	-0.97977	0.488082	-1.52772	0.220885	-1.37476	0.83832	-0.0570053	-2.41784	-0.250477	0.664764	-0.915605	0.0724691	0.622883	-1.08341	0.073465	0.527587	-0.207001	-0.596625	-0.350897
80	3.09347	1.65559	0.698464	0.576569	1.48784	1.59701	0.467637	1.13277	2.45513	3.34463	1.53448	1.12864	1.3251	1.89089	1.8794	1.45971	3.7663	3.25717	3.15857	1.41706	2.83254	2.35076	2.04386	1.58635	1.90557	2.05951	2.15994	2.80397		-0.259357	0.40782	-0.403325	-1.62938	-1.33916	-1.23684	0.0150496	0.603364	0.184801	0.0753312	-0.131983	-0.105807	0.312281	0.882143	-1.4335	-1.79143	1.88316	0.559091	-1.04476	-0.311562
81	1.97865	2.18488	1.19406	-0.828574	2.25531	2.23543	1.35147	2.45135	3.19863	2.91035	2.95059	1.97322	0.375875	1.67886	2.00472	1.55699	3.82643	4.40052	2.80196	2.33967	4.29224	2.78647	0.751083	0.677736	0.40204	3.19276	1.08602	3.56847		-0.585931	-0.79412	-0.42672	-2.57451	-1.10894	1.75202	0.861571	0.10207	-0.065329	-0.475677	-0.481117	-0.487106	-0.149574	0.619672	-1.85046	-0.98474	0.973812	0.194372	-0.417643	-0.415306
82	2.29807	1.92789	0.48572	-1.5292	1.99151	1.40197	0.810202	1.05693	1.31004	3.39595	-1.0915	1.01388	0.549396	1.26379	1.70494	0.843639	4.50017	3.16758	3.28609	3.63901	3.76702	3.46606	0.822375	0.369125	1.42723	2.03885	2.1969	0.580845		-1.05606	0.194978	-0.577958	-0.394164	-0.157859	-0.397981	-0.0533008	-0.362785	-0.480116	-0.451421	0.428567	0.658014	-0.509225	-0.484405	-0.537493	-0.71665	0.773835	0.407271	-2.10535	0.276431
83	1.3897	2.38139	1.1131	1.81801	1.78072	1.95939	1.2689	0.82208	2.44836	2.63598	1.91022	0.21677	-0.0557702	1.62847	1.51303	1.1021	3.00305	4.41065	2.46233	3.18203	3.26292	1.9966	1.67588	0.141209	1.30353	1.22296	2.24465	3.56503		0.653271	-0.951199	0.730286	-1.10893	-1.23665	0.58287	1.879	-1.37538	0.0788266	0.542891	1.34179	-0.649568	-1.60714	0.312695	-1.09028	-0.46503	-0.035092	0.184317	-1.67977	-0.735402
84	1.24254	2.06077	0.206958	0.793318	1.55416	1.87536	1.00848	2.37438	2.38428	2.78397	2.27487	0.57579	0.579835	2.01526	-0.127249	0.953749	3.23175	3.07	3.36617	2.67669	3.6328	3.25789	1.12036	0.0235894	2.28407	1.28128	2.47533	4.1725		-0.810789	-0.333772	2.07196	0.401168	-0.282345	-0.332805	-0.0696898	-0.183418	-0.0279043	-0.0231484	0.629186	-0.0162203	-1.14885	0.804067	-2.05648	-2.63009	0.324866	-0.723941	-0.542251	0.10759
85	1.34634	0.645514	0.402643	0.753362	1.64046	0.674897	0.798249	2.0572	1.99913	3.98396	1.17253	0.602624	0.341089	1.44777	1.57269	1.12575	3.72474	3.22694	4.19331	3.01773	2.77942	2.99959	0.838255	1.07974	1.29601	2.04706	2.25077	3.11333		-1.36118	0.497484	0.954321	0.282429	-0.907035	0.562698	NaN	0.581892	0.910985	0.388108	-0.136877	0.278886	-1.2491	0.960751	-0.211709	-1.74144	0.837046	0.200005	-0.683396	-1.01007
86	1.63434	0.454336	-0.0147819	0.193184	2.15203	2.68002	1.76733	2.00117	3.31372	2.99825	1.27223	1.17265	0.796086	-0.289585	1.78939	1.968	2.70414	2.72462	3.1999	2.68055	3.41249	1.7764	0.3748	0.374187	1.15493	1.9161	2.49575	2.82497		0.200376	0.651942	0.517781	-0.673449	-0.165986	1.13692	0.8106	-0.42083	0.168556	-0.0498368	-0.0374246	0.736361	-0.022836	-0.469769	-1.02371	-1.34868	-0.704796	1.19225	-2.08296	-0.0158866
87	1.75886	1.53598	-0.131954	0.48508	1.95355	1.91081	1.24872	0.810778	2.15401	3.32903	1.96552	0.600678	0.439954	2.34098	1.58684	0.206143	3.26981	3.67237	2.71725	1.36218	2.74182	2.68258	0.0441614	1.23995	-0.407097	2.90404	2.06741	0.275081		-0.628286	-1.23351	1.19877	-0.835852	-0.351558	-0.279926	0.0275732	-0.658724	0.546525	0.296409	0.800479	1.15329	0.362735	1.17792	0.136434	-0.619389	1.09565	0.11609	-1.15189	0.265653
88	1.43281	1.43217	0.940041	-0.614352	0.938352	0.798736	0.724612	2.22275	2.48238	3.5961	1.09361	1.23987	0.869984	0.467153	1.37998	0.577857	2.32784	2.59215	2.47558	2.6715	3.00251	3.39829	0.36934	0.377329	1.02169	1.93734	1.13621	2.87195		-0.537367	-0.0310175	-0.77294	-0.640844	-0.0555789	-1.1051	0.918264	0.335974	-0.0928744	1.57234	0.0622417	-0.247513	-1.01927	0.682342	-0.313182	-2.48283	0.327616	1.97357	-1.79063	0.0508373
89	2.77667	0.877348	0.882442	0.00220351	2.23242	2.52652	0.901398	2.79087	1.83971	2.24853	0.811064	1.20553	0.629042	2.39846	0.877471	1.24915	3.97269	1.98302	2.10707	2.06279	2.12645	2.88198	0.932449	0.641763	1.71033	2.76075	2.40015	3.71929		-0.833712	-0.657552	-0.679822	0.0546324	-1.15299	1.34673	-1.25813	-1.28809	0.551078	-0.231719	-0.058208	-0.458912	-1.03335	0.274033	-1.30193	-1.45774	-1.98705	-0.0442292	-1.17382	-0.986614
90	2.0407	1.47984	0.959323	0.220633	0.588986	1.711	1.37546	2.52281	2.29984	3.32019	1.95072	0.431674	0.244712	0.957106	1.29421	0.428594	3.10895	4.31007	2.87769	2.51946	2.5167	1.96933	1.91844	0.368353	1.70774	2.52847	1.37121	3.75609		0.772652	-0.594451	0.751077	-1.44769	-0.837537	0.0316987	0.671891	0.60851	-0.552343	0.442812	1.08308	-0.829609	0.189035	0.235917	0.634779	-0.316043	-1.66771	0.0486145	-0.836903	-0.802753
91	2.3164	1.63897	0.570974	0.49898	1.4097	1.3922	2.51788	2.06921	2.1657	3.09012	1.2455	1.19721	0.198083	1.72335	0.518743	0.182633	2.45663	4.75613	1.98995	3.01948	3.32657	2.3034	0.992847	0.532212	1.83834	1.96662	2.76686	0.94477		-0.221628	0.154896	0.752657	-0.943547	-1.54792	1.42476	0.144552	-0.0588925	-0.277924	-0.122364	1.00239	-0.0267925	-0.553829	0.94458	-0.174773	-0.631522	-0.384875	1.04997	-1.89052	-1.07898
92	1.42427	1.19051	0.847984	0.512062	0.973598	2.16845	1.24616	2.30148	2.42419	1.9075	1.59179	-0.184562	0.660279	0.0323215	1.79158	0.629114	2.25374	2.08576	2.81691	1.9445	2.6657	2.7723	1.2691	0.723535	1.67037	1.69554	1.00103	2.76993		-0.385469	0.249393	0.407829	0.712039	-1.32524	0.822924	-0.221752	0.400945	0.80094	1.15198	0.775054	0.194532	0.125623	1.80395	-1.34779	-0.443524	-0.27207	-0.109828	-0.982149	-1.07936
93	1.84455	0.933864	1.13811	0.937354	1.78668	1.09309	2.04578	1.30505	3.11228	2.79056	0.119317	1.10227	0.527945	1.0931	1.29108	0.520642	3.3715	2.1603	2.71038	2.15024	3.85053	2.0257	1.71093	0.366811	0.463588	3.08426	3.67724	3.35569		0.143353	-0.132207	0.671267	1.22697	-0.619244	0.988946	0.902145	-1.13242	1.38763	-0.379755	0.751663	-0.771117	0.115009	0.619488	0.301519	-0.750946	-0.24958	0.814772	-0.522093	-0.663486
94	1.31398	1.03076	0.304907	1.81299	2.97929	1.9399	0.788291	1.99154	3.06929	2.72349	0.798484	0.943284	1.17379	1.21786	1.99311	0.625162	3.52252	2.90072	2.07139	2.47642	1.76483	2.24331	0.844255	0.830893	1.33804	2.78284	2.03067	3.23129		-0.16207	0.754958	0.401954	-0.383336	NaN	-0.774303	-0.490258	-1.15391	-0.930056	-0.478277	0.884925	-0.194223	-0.682884	0.534176	-0.340272	0.448758	0.242545	0.890839	-1.27606	0.167275
95	0.688822	0.692979	0.553968	1.06679	1.41612	-0.241466	0.463594	1.24948	2.13937	1.80107	2.08041	1.78517	1.11131	0.880193	1.90474	1.11707	3.70057	2.24412	3.04715	1.55808	2.98396	3.02509	0.928175	-0.120547	1.61152	2.66796	1.71347	3.76793		0.0343946	0.519808	0.81383	-1.03867	-1.56419	0.696592	0.21817	0.75044	1.04977	0.568262	1.15411	-0.540194	-1.58688	0.904385	-1.66329	-1.2609	0.305222	0.0986975	-1.21574	-1.55431
96	0.823594	0.318586	1.00975	-0.888394	0.73308	1.33428	0.999334	2.29151	2.18172	2.74547	1.82707	1.03139	0.641371	1.62415	1.78338	0.361577	3.2919	3.42866	1.55579	2.20068	2.49774	1.48367	0.667852	0.538967	1.6129	3.1014	1.78504	2.73511		0.462087	0.190121	0.105125	-0.916466	-0.114065	-0.84323	-0.589227	0.32686	-0.1385	-0.54464	0.0461862	0.554498	-1.58494	1.00535	0.520951	-0.954855	0.840852	1.36316	-0.865413	-1.07161
97	1.90918	0.227506	0.649148	-1.26486	0.99111	1.85108	1.16046	1.19621	2.2557	1.73227	1.9884	0.201456	0.685484	0.938072	0.774673	0.666036	3.48197	3.5508	2.24418	2.45916	2.43148	2.32934	2.00389	1.35281	2.22315	2.69762	1.1602	0.619536		-0.535293	-0.520782	-0.0998255	-0.101656	0.446932	-0.965195	-0.218144	-1.1065	0.778625	-0.16428	0.682489	-0.175342	-0.828086	0.641345	0.0354421	-1.33297	-0.48441	-0.00847659	-0.690579	-1.30037
98	0.644859	0.60587	0.0505704	0.439262	1.55725	-0.287307	1.42393	1.0189	1.0372	2.54467	1.84847	0.450367	-0.202422	1.32851	-1.1996	0.670296	3.28628	3.35041	3.51938	1.58701	2.22802	3.25555	2.31887	0.169255	1.27241	1.92715	1.63953	1.57556		0.413582	0.926291	0.349568	-0.4331	0.0876632	0.14448	-0.611153	0.092498	-0.0969846	-0.322915	1.44797	0.563372	-0.849445	-0.465596	0.874245	-0.423072	1.63753	0.0881445	-0.0900781	0.157303
99	2.38674	-0.0745182	0.0118384	2.55992	1.29015	0.998342	1.44097	2.07122	2.19733	2.34571	1.81652	-0.368171	1.62536	1.09405	1.43956	0.211925	2.3217	3.67305	1.31879	2.12093	1.56181	1.86824	1.34155	0.0779558	1.32327	1.57014	1.31471	3.30011		0.822911	-0.181388	-1.81641	0.25372	-1.39993	-0.679316	-0.399253	0.0185965	-0.27772	0.438369	0.419404	0.339509	-0.866921	0.882862	0.20971	-1.4247	0.810517	0.25825	-0.0197146	-0.154058
100	1.2173	0.82087	0.141977	2.48802	2.06926	2.35222	1.3502	2.07277	1.48056	2.39088	1.92605	0.569019	-0.0577209	1.15108	0.371872	0.379011	2.96651	3.39219	1.1958	2.24376	2.87788	3.40492	0.912942	0.614781	1.29872	1.6049	1.6958	2.38955		0.437809	-0.255093	0.754875	-2.28785	-0.573853	0.616895	0.201707	-0.678504	0.812221	-0.360108	0.526228	-0.201358	-1.46693	-0.966297	-1.99847	-0.924322	0.459208	0.285767	-1.00841	0.0573219
101	1.79274	0.86459	0.794288	1.74959	2.26537	2.24086	1.54186	1.4644	3.00803	0.925699	2.45464	-0.232234	0.247778	1.88532	0.455686	0.579101	2.07235	3.61558	3.19897	2.07016	3.66939	3.00465	1.71766	0.671289	1.21834	0.813777	2.00726	3.52748		0.493174	-0.640319	-0.0330069	-0.78012	-2.06897	-1.5227	0.072727	0.601858	0.10184	-0.192188	0.962722	-0.205991	-0.597366	0.36781	-0.912499	-0.932675	1.89333	0.975644	-0.895872	0.557733
102	1.61907	1.66068	1.94135	1.77347	1.31859	0.973278	0.69717	1.23303	2.43291	1.70787	1.23209	1.06181	0.366845	0.468758	0.420281	0.334272	2.87957	2.39271	2.90609	1.81381	2.06741	3.2406	0.872872	1.01029	1.74481	2.31665	1.38313	1.54318		-0.249416	0.171939	-1.16975	-1.10238	-0.287439	0.676239	1.24877	0.361126	0.0248564	0.133966	0.430978	0.603289	-1.3132	-1.07168	-0.802613	-2.22821	1.10607	0.163967	-0.64919	-0.0760069
103	2.47593	1.87175	0.0990353	0.515907	1.09336	2.58376	1.72838	1.66895	2.08416	2.81116	0.613913	1.83999	-0.117681	1.70999	0.880792	1.04447	2.46454	2.89201	1.49933	1.94653	3.27773	2.54093	1.07809	0.0443367	0.932569	2.65123	1.7347	2.66615		0.53014	0.310524	-0.139466	-2.26253	-0.501355	1.0868	0.604912	0.0835746	1.2582	-0.254282	0.676281	0.152768	-0.712687	0.457991	-0.710657	-0.570435	0.301778	0.361435	-0.464593	-0.742371
104	1.37364	1.34412	-0.764509	1.99367	0.929473	2.72944	0.967802	0.927686	1.85179	2.86183	2.29405	0.635147	0.437474	1.9781	1.06028	0.701802	3.69869	2.7636	3.02873	2.68713	1.67493	2.02675	1.53963	0.448048	2.06239	1.89768	2.48355	2.63093		1.0929	-0.662881	0.211294	-0.0346139	-2.31659	-0.0570001	0.999919	-0.249712	0.100728	-0.0970468	0.156326	0.509745	-0.776906	0.370704	-0.345693	-0.334423	-0.165074	1.43321	-1.14025	0.442566
105	2.06787	1.22551	-0.00436248	0.214541	1.82176	2.30822	0.902738	1.1167	2.58281	1.60392	1.02391	1.27991	0.432406	1.59931	0.902645	0.472261	3.83866	4.31674	1.68289	2.83634	2.48293	0.915176	0.741012	0.196214	0.873088	2.93958	2.46589	2.75644		0.464198	-0.0612821	0.272041	-0.246621	-0.20566	0.0487858	0.909266	-1.35421	-0.00929177	0.683846	-0.26601	0.750073	-0.423919	-0.016793	-0.0272426	0.0935512	0.432656	-0.0619746	-1.6192	0.900857
106	1.90678	1.51299	-0.231838	2.01562	0.492671	1.53293	0.859096	0.146882	1.69327	2.01817	2.10448	-1.81052	0.440459	1.77714	1.76434	1.11494	4.05713	3.31999	1.92925	1.47797	1.84533	2.64536	-0.252386	-0.611033	0.246448	1.99299	1.33602	2.40241		-0.859809	0.659254	-0.636185	-0.515141	0.425056	0.0782831	-0.63974	-0.0989523	0.544749	-0.295919	-0.379832	0.653687	-0.45207	0.242815	-0.655905	-0.596943	0.941561	0.377641	-0.726198	-0.781378
107	0.384096	1.22536	0.58959	1.28818	1.82718	2.64808	1.90487	-0.0265867	2.39403	3.28469	1.19558	0.502607	1.55384	2.00457	0.367381	0.749382	2.46777	2.00719	2.76363	0.980966	1.88654	2.49796	1.02501	-0.304827	-0.442508	1.94254	2.80484	1.33776		0.487983	-1.34978	-0.268522	-1.20558	-1.53262	0.804195	0.58273	-0.278323	0.18932	0.856344	-0.02324	-0.119874	-0.0244925	-0.647384	-1.48042	-0.337817	0.153882	0.911382	-1.60071	-0.813417
108	1.74709	0.972014	1.06199	0.778141	0.757891	2.19347	1.21794	0.272617	1.87622	2.25202	-0.266667	0.0398659	0.702267	0.280017	1.51527	1.32039	2.41516	3.00792	1.59508	1.6787	2.03954	2.00608	1.48843	0.86761	0.879817	1.83242	1.54022	2.25102		-0.873645	-0.537349	1.83719	-1.42083	-0.0724706	0.602732	-0.59216	-1.01905	-0.308247	0.275154	-0.191603	0.148724	-0.434962	-0.302017	0.337981	-0.678678	-0.0439422	0.406255	-0.610525	0.610302
109	2.31799	0.224414	1.05804	1.12223	1.22023	1.86129	0.853813	0.332753	2.87348	2.25908	0.931174	0.590004	-0.139155	1.3083	0.776861	0.783456	3.15951	4.13338	2.78279	2.22675	2.24809	1.70319	0.230793	-0.726562	0.355245	0.0922126	1.89291	1.58448		-0.559164	-1.08546	1.10801	-1.32374	-0.999704	0.609383	0.254368	-0.317613	0.167877	0.648505	0.64373	-0.750032	-0.696825	-0.245803	-0.903046	-1.51582	-0.283896	-0.0521431	-1.00121	0.822276
110	1.61424	1.45049	0.420409	-0.159974	0.0684835	0.699883	0.76885	0.787517	2.10436	2.83153	1.57668	-0.323712	0.108767	0.993855	0.847693	1.28368	2.78864	1.16629	1.93148	2.24139	1.89238	1.49452	1.16293	1.63389	1.04351	-0.788834	1.64954	0.682235		0.202641	-0.098296	1.19238	-0.0814734	-0.820114	-0.180345	0.273692	-0.179138	-0.230775	-0.367375	0.167231	0.049669	0.0464693	-0.632804	-0.628395	-0.518338	0.584221	1.36282	-1.68813	-0.191224
111	1.68552	1.58742	0.437787	0.464773	1.12133	1.67698	1.73003	1.66608	1.87324	1.72284	1.20099	-0.47865	-0.917468	1.09957	1.36737	1.01102	3.0384	3.40672	1.99825	0.976413	1.78181	2.81693	1.60391	0.615015	0.675611	1.80987	2.64501	2.02881		0.252021	1.3463	1.46138	-0.39463	-0.902597	0.0750935	1.03797	-0.398004	0.12344	-0.395522	0.882899	-0.343067	-0.129999	-0.26545	-0.260605	-0.772831	-0.501041	1.45738	-1.61077	0.0992874
112	1.4477	0.624319	0.953665	0.45009	1.5816	1.81949	0.439901	0.663299	1.14348	1.67958	1.36464	-0.16503	0.423931	0.15119	1.54039	1.20893	1.61299	3.2518	2.076	2.0839	2.32437	2.1639	1.05331	-0.270048	1.11813	1.68077	0.924258	2.98908		-0.434518	0.331202	-0.173214	0.462063	-1.57126	-1.28234	0.691955	-0.732678	0.441993	-0.237847	0.430499	0.920738	0.578788	-0.268954	-1.00552	-0.560741	0.687286	1.70862	-0.123792	0.475804
113	1.47366	1.3538	0.145215	0.845279	1.09438	2.29539	0.510567	-0.579781	2.32614	2.35213	1.18818	-0.102826	-0.0323492	0.897604	1.61606	0.0329174	2.97924	2.64664	2.1838	1.11819	3.4473	2.15638	0.99	0.322185	1.66959	1.47423	1.50452	0.11175		0.192692	0.0738091	0.226857	0.707216	-0.815007	0.83982	0.157567	-0.432009	0.0634798	0.777352	0.162103	-0.451351	0.0617575	-0.00480846	-0.241407	0.0213921	0.484189	0.725706	-0.8	-0.124294
114	1.44232	0.737795	1.86199	1.275	1.32813	1.38612	0.774817	2.05651	1.11392	1.66541	1.28629	0.505334	0.381145	1.70869	1.50857	0.435155	3.76451	3.00575	2.57138	0.964066	2.0273	1.88518	0.969045	0.78506	0.790877	2.47769	2.11195	1.21232		-1.61422	0.2687	0.254013	-1.55326	-1.75042	0.735499	1.03889	-0.0619044	0.41958	0.486593	0.215192	0.578936	-0.0292523	0.930306	-0.469864	-1.64412	2.54431	0.584234	-1.61588	-1.15465
115	-0.471606	1.22053	-0.374751	1.989	0.407259	0.0698599	1.56518	1.18153	1.3773	1.26957	1.4556	-0.348708	0.456717	2.46701	0.853443	0.883113	2.73074	2.22179	1.41262	1.74782	2.33517	1.40218	1.42791	0.319275	1.69964	2.04097	2.2596	1.60931		-0.446414	0.53744	0.0807209	-0.243822	0.120846	-0.290974	0.0118593	-0.894271	-0.578516	-0.794383	1.10446	-0.841205	-1.28942	-0.106423	-2.25723	-0.813009	-0.562551	0.711715	-0.999708	0.589186
116	1.13175	-0.272239	-0.136593	2.07628	1.43565	1.81513	0.645128	1.2301	1.92469	2.86322	1.03565	-0.0698603	-0.0723365	2.21461	0.878539	0.276682	3.05761	3.00448	2.37608	1.99533	2.60531	2.17065	0.537771	0.129111	1.06678	1.14613	1.26446	-0.271436		0.733911	-0.114882	0.754301	-0.48248	-1.26606	0.200171	0.856065	-0.040741	0.236646	0.367613	1.17623	-0.429474	-0.19272	0.819079	-0.642442	-1.95537	0.974909	0.153216	-0.478015	-0.797129
117	0.515874	2.61382	0.395272	-0.176752	-0.0280453	1.87491	0.988171	1.86141	1.36087	1.97057	1.52074	-0.888101	-0.359824	0.889079	1.32341	0.254767	2.38976	0.922171	1.46729	1.21418	1.97327	2.68894	0.965459	0.488004	1.11718	2.55677	0.817226	3.36618		-0.327389	-0.13354	0.409956	0.0727081	-0.729781	0.223676	0.274172	-1.28754	1.11574	-0.351374	1.11923	0.423878	-0.780185	0.225508	0.286109	-0.550073	2.31884	0.778902	-1.79522	0.484489
118	0.411226	2.09371	1.56655	0.408728	1.85913	0.591334	0.881862	1.93604	1.60992	1.75151	1.4781	0.081334	0.369525	1.02438	1.10578	0.651151	2.25213	2.42985	3.41427	2.03638	2.77543	2.46459	1.62195	-0.113571	-0.338215	1.41106	2.77264	2.51196		-0.452955	0.173515	0.76418	-0.781742	0.35081	-1.709	-0.101178	-0.311286	-0.139041	0.60949	-0.49168	0.341276	-0.0945509	0.484388	-0.0548615	-1.69381	0.523356	-0.153734	-1.8591	-0.22676
119	1.54403	0.686386	0.935894	-0.165839	1.2832	1.4315	0.630216	1.92395	1.91998	2.44869	-0.27449	1.2509	-0.543638	1.49548	0.00991255	0.991955	3.49736	1.78031	1.09084	1.15996	1.59439	2.29021	2.03813	0.283371	1.87795	2.65202	1.78314	2.24953		-0.442442	0.69515	2.10168	0.552635	-1.23406	-0.316452	0.0500338	-0.72782	0.314434	0.603983	0.658178	-1.09226	0.180133	0.215648	-0.0119319	-0.610658	1.46799	1.06872	-0.493683	-1.34039
120	1.25977	1.18547	-0.61294	-0.833535	1.05259	1.33297	1.24421	1.19501	2.21839	2.30588	1.07772	-0.106861	0.615208	1.3664	1.10294	0.13725	3.73048	1.9893	2.72655	1.25627	2.62015	1.63121	0.922697	0.458085	1.02142	1.73312	2.30568	0.708418		-1.95413	-0.608895	0.162683	0.455409	-0.640595	-0.786495	-0.713049	0.420569	-0.657685	-1.52525	0.618042	-0.0196504	0.586134	1.35794	-0.984636	-0.0380097	-0.101452	0.606418	-0.376977	0.109122
121	0.537229	2.13676	-0.157565	-0.91792	0.18377	1.08327	1.89014	1.01863	1.8076	1.96625	2.05412	0.0184216	0.162953	1.58069	1.42777	0.743754	2.26394	2.38534	2.22195	1.73584	3.41934	1.83892	1.11833	0.468818	1.4716	1.4557	2.05172	1.54393		-0.587958	0.633297	1.08257	-0.996471	-1.41863	-0.132891	0.122672	0.702016	1.0086	0.820007	-0.0614083	0.394256	-0.0893117	0.514308	-0.122042	-0.570745	0.539262	1.0411	-0.689786	-0.637867
122	0.656054	0.15792	0.629764	-0.690679	1.67055	1.37369	0.745165	1.48357	1.52143	2.14147	1.92551	-0.338453	0.71038	1.06025	0.55564	0.36235	2.62005	2.80338	1.93155	1.31379	1.71189	2.56278	1.0524	0.246077	1.51888	2.50656	2.15851	3.31463		-0.683412	0.212486	-0.37125	-0.0530243	-1.80756	0.386086	0.852684	0.178924	-0.753237	0.641144	0.82407	0.501808	-0.443728	0.173075	-1.35186	-0.172323	0.658738	0.598763	0.0192876	-0.506467
123	0.119899	3.16008	0.00409639	-0.57327	1.0239	1.58283	1.00001	2.02117	1.92036	1.90159	1.7191	1.53927	0.552261	0.607427	1.77404	0.944312	3.26126	2.71088	2.06015	2.47156	2.16854	1.57406	0.394098	0.820826	0.533436	2.18112	1.24586	1.76558		-0.444165	0.0871056	0.737131	-0.706519	-2.0454	-0.034124	0.919519	-1.26908	0.122901	0.37372	0.623134	0.199203	0.304659	0.703902	-0.143892	-0.521663	0.443226	1.21284	-2.64913	-0.147526
124	1.33227	1.2833	1.51634	1.99368	0.777706	1.59969	0.566006	1.56373	2.01039	1.7058	1.82106	0.924171	0.581279	0.956585	1.50846	0.796818	2.05113	2.87826	1.13316	1.3775	2.79552	0.612717	1.56452	1.64265	-0.829765	1.65602	2.36131	2.85472		0.781296	0.764018	0.572432	-0.630745	-1.31445	0.158547	0.820651	-0.0745101	1.12363	-0.105024	1.20979	0.4005	0.0312385	-0.0348858	-1.30179	-0.755521	0.263049	1.40797	-0.869207	-0.0249651
125	0.918725	1.97202	0.76439	1.16693	0.411445	1.09114	1.08869	1.02513	1.3941	2.13713	1.79773	0.497974	0.506985	1.27838	1.42833	0.399856	1.68455	2.40453	2.38346	1.30909	1.87013	2.10664	1.34983	-0.67802	1.01287	1.98094	2.05712	1.96166		0.454938	-0.034454	0.730045	-0.455567	-0.36516	-0.368287	0.5069	1.08266	0.676166	-0.445562	-0.0984105	-1.0791	0.644643	1.13813	0.0673307	-2.25493	-0.191671	0.389477	-1.02918	-0.116798
126	1.32348	0.927336	0.783102	2.00427	1.1144	1.93421	1.64714	1.60055	1.13328	1.33799	0.94566	-0.0196846	-0.250964	0.708272	1.05823	0.123562	2.16773	2.37438	1.50523	1.08765	1.47055	2.18255	1.10063	0.953344	-0.057498	1.49674	2.53927	2.6231		0.431303	0.250655	-0.30908	-0.704916	-1.5109	-0.550368	0.308554	0.00271811	0.596433	-1.18924	1.15946	0.018957	-0.301966	-0.359031	-0.108333	0.152703	1.52982	-0.132381	-1.51396	-0.320031
127	2.00863	0.755707	-0.67452	-1.06368	-0.00215634	0.292968	0.869259	0.779167	1.42129	1.06786	1.31505	0.456196	0.251111	1.06083	1.07679	0.490195	1.50981	2.67633	0.881685	2.92519	1.82259	1.39185	0.995223	0.487701	0.24488	1.86252	1.86378	2.93822		0.715216	-0.198185	0.0205562	-1.61734	-0.782002	0.513298	0.717559	-0.187141	0.339607	0.0839732	-0.0962223	0.928969	0.0248201	-0.39748	-1.81232	0.883874	0.424576	0.260702	0.0204933	-0.0816248
128	1.39527	1.51723	-0.0262959	-0.0340306	1.21539	1.23069	0.0206737	1.94712	2.2276	1.93097	1.65824	0.564122	0.0868036	0.551305	-0.299977	0.737395	1.96244	2.09363	1.96695	1.33766	1.95392	1.64011	0.06074	0.655902	1.35868	1.40947	2.21314	2.22136		0.0906775	0.0880116	-0.349705	0.409326	-0.71495	-0.666855	1.72516	-0.0611961	0.151123	-0.88206	-0.233978	0.375575	0.0999229	-0.653941	NaN	-1.99038	1.17175	0.232625	-2.48357	-0.472729
129	1.00358	1.3209	1.09704	-1.31519	1.28732	1.44089	0.383221	1.99749	1.14278	2.14936	0.599789	0.896894	-0.226078	1.68027	0.296745	0.261882	2.0014	1.95824	0.912936	2.04652	0.851439	1.59305	0.0938393	0.379763	1.34706	1.69986	1.69548	3.70606		-0.507415	-0.727696	-0.155784	-0.352775	-0.966803	-0.0530417	-0.568104	0.4762	0.0303182	-0.353855	0.34699	-1.6617	-0.429839	1.43021	-1.22416	-0.571392	1.57533	-0.0133265	-0.833336	-0.172179
130	2.235	0.42	0.521832	1.53357	1.35717	1.14025	0.26124	0.229684	2.18622	0.208389	1.28049	1.03873	1.28492	1.88585	1.14266	0.422093	1.6208	3.31028	2.28114	0.715952	2.5776	0.53701	-0.0592945	0.620912	0.331305	1.79069	1.05747	1.72783		0.292131	-0.899637	1.1355	-0.513494	-0.0841165	2.02201	-1.07435	-0.388952	0.768362	0.156288	0.777316	0.267234	-0.0693271	-0.027255	-0.191228	-0.867731	-0.609905	0.980913	-0.61887	-0.740324
131	1.21447	0.800095	1.49067	1.45832	1.65822	2.82509	1.03075	0.378584	2.52858	1.63018	0.825659	0.224103	1.08975	1.53775	0.806101	0.237775	2.3718	2.46277	0.467692	1.54998	2.032	0.56341	0.271784	-0.198325	0.852134	2.30882	1.25659	1.76091		-0.63145	-1.17882	0.829793	-1.43918	0.472755	0.723359	0.69946	-0.0177893	1.0221	1.05194	0.273305	-0.218678	0.553295	1.43849	-0.694537	-0.72662	0.53016	0.00561502	-1.77802	0.0102896
132	0.584605	2.15922	-0.126352	-1.04733	1.08439	-0.164273	1.05244	1.9401	1.38899	1.61063	1.49686	-0.387496	-0.269084	0.57379	0.795769	0.162205	2.11365	3.02322	1.25827	1.52535	2.6119	1.70141	0.158622	-0.342419	1.66738	2.81254	1.47178	1.29812		-0.135973	0.857831	0.169952	-1.72827	-1.29053	0.60186	0.828261	-0.0282187	-0.0681935	-0.0555009	0.150796	0.335386	0.418379	0.683894	-0.206818	-0.255013	0.0150628	0.765907	-1.92485	-0.862458
133	1.65947	1.16372	-0.864354	-0.562683	1.0869	1.36098	0.98574	1.40354	1.86031	0.993429	1.3047	0.523074	0.200657	1.4112	1.47583	0.742291	1.70857	2.00879	1.91181	1.00613	1.63953	0.618732	1.77778	-0.520877	0.767823	1.49743	1.65701	2.12573		-0.0449106	-0.795868	1.1755	0.370414	-0.805989	0.195513	0.614259	0.145226	0.958209	0.925895	1.39339	0.496131	-0.212037	-0.368667	-0.321428	-0.902371	0.766735	0.255895	-1.03548	0.350811
134	1.2348	1.4483	1.27504	1.62591	0.636037	1.51867	1.33692	1.48153	1.63143	1.96712	1.01966	0.588088	0.269047	1.0478	1.24381	0.128264	2.68582	2.43284	1.86844	0.9075	2.02673	1.67982	0.829747	-0.261402	-2.74164	1.82211	0.6962	0.918674		0.163905	0.540469	0.450475	-0.990407	-0.115762	1.80982	-0.389772	0.618883	-0.197419	-0.477832	0.137114	-0.165529	0.137792	-0.361649	-0.525437	-1.15423	0.150566	0.34202	-1.56239	-0.441112
135	0.534722	-0.275648	0.179908	1.18794	-0.315025	0.602535	0.162161	0.83938	0.37038	2.24806	0.418859	0.751717	0.36065	1.10722	1.29825	1.02829	2.18751	2.46144	1.46443	1.09345	1.75723	2.262	0.65621	-1.31589	0.510787	0.0573736	1.89015	2.03582		0.960874	-0.673861	0.155521	-0.816026	-1.62829	-0.300275	1.68454	-0.619707	0.144562	0.874721	0.326767	0.287994	-0.678531	-0.289609	-1.68404	-0.549018	0.0585443	-0.327714	-1.42095	0.297131
136	1.01091	1.25582	0.723464	-2.60116	1.40153	0.689604	0.154104	2.11195	1.61178	1.74114	1.14263	0.262685	0.271829	1.08042	0.996257	0.460864	1.37484	2.45285	1.276	2.12142	2.65101	0.952278	0.0900564	0.211298	0.961428	1.2337	2.03731	1.33179		-0.531317	-0.235375	-0.884234	0.767796	0.367473	-0.560037	-0.0879458	0.200628	0.348936	0.722622	0.408906	-0.172999	1.55579	-0.630898	-0.59737	-2.4406	1.4199	0.602762	-1.78621	0.106003
137	0.527286	1.64627	1.38182	0.78705	0.267562	1.54813	1.28827	0.413342	1.44743	1.226	0.204745	-0.740849	-0.137496	1.35988	1.59004	-0.150217	2.47679	2.91045	2.51703	1.62874	1.82116	1.4842	0.443764	-0.757736	0.534324	1.27714	1.57379	2.17241		-0.093191	1.15808	0.961413	-1.09655	-0.12998	-1.63641	0.352437	-1.43701	0.641999	0.00666944	0.305176	-0.283492	0.482049	-0.380334	-1.1271	-0.897003	1.10905	0.700143	-1.43878	-1.27777
138	1.1104	2.69712	0.232998	0.559011	0.826105	0.782876	1.21207	0.286408	2.11207	1.2342	0.986359	-1.49764	0.966233	0.238968	1.03827	0.520878	2.34759	2.70856	2.16907	1.26415	2.3606	1.88341	1.15649	0.220883	0.978964	1.99796	1.86608	2.63645		-1.41064	-0.434507	0.251531	-0.465545	-2.0646	1.38765	0.680297	-0.397872	0.611249	0.33944	0.969231	0.348104	-0.59155	-0.0801239	-0.202771	-0.985155	1.52043	0.990815	-1.58757	0.388828
139	0.77209	2.28186	-0.227413	0.0895266	0.863057	1.2048	1.75849	0.959993	2.00819	1.87788	1.49967	0.937514	0.351694	-0.0522105	1.17096	0.441035	3.04243	2.27196	1.54813	1.21547	2.35602	2.22791	0.993091	-0.183588	1.45404	1.10418	1.97485	2.16681		0.0412064	0.903178	1.06668	-0.95561	-0.459017	0.0593831	-0.416898	-1.41319	-0.0394232	0.757825	0.629667	1.14745	-0.94485	-0.0255385	0.550105	0.0642758	0.198584	0.228863	-0.668215	-0.128436
140	1.05841	1.84979	1.23066	0.907225	1.02737	0.792732	1.67121	0.966324	2.00327	0.231439	0.819222	1.21648	0.348334	0.841285	-0.250895	-0.360806	2.46493	2.28371	1.71878	1.54084	1.39377	1.80499	0.937105	-2.44699	0.726083	1.23493	1.80155	2.56878		1.29273	0.162866	-0.196198	-1.23371	-1.3077	0.426224	-0.489646	0.184419	-0.267366	0.272157	1.61272	0.794022	1.13417	-0.807157	-1.75126	-0.570446	0.902656	1.18662	-0.311345	-0.863159
141	0.161359	0.604777	1.43195	-0.450511	1.54081	2.18551	0.15163	0.553038	2.49239	0.528157	1.09505	1.53435	0.535143	0.937507	0.859662	0.106821	2.33348	1.71529	1.72837	2.52823	2.21373	1.80596	1.82161	0.239187	1.23166	1.78509	0.942615	1.87407		0.289743	0.186118	0.777766	-0.100622	-1.1444	0.968917	0.123935	0.167796	-0.113659	0.343516	0.257351	1.06445	1.11806	-0.114539	-0.757704	-0.2784	1.16599	0.59451	-0.0339833	-0.897497
142	1.57335	0.805334	1.05171	-0.330557	1.30409	1.59581	0.612895	1.17678	1.79736	1.26488	0.786283	-0.57621	-1.01482	1.31467	0.655862	0.170275	2.23014	1.62121	2.07353	0.460022	0.56096	1.89491	0.251101	0.475108	1.64008	1.65211	2.29433	3.13567		0.173341	0.609836	-0.0167187	0.0725613	-1.32644	-0.0165077	-0.000273689	-0.0401646	-1.23954	0.335914	0.144687	1.07534	1.02775	1.50053	-0.341617	-0.0551919	1.52737	0.369716	-1.11372	0.18349
143	0.412198	0.372922	-1.23186	-0.0318425	0.24988	1.76085	0.756667	0.703391	1.30252	1.97508	1.79912	-0.987702	0.230483	0.846949	0.974479	0.0716584	2.03823	2.53362	1.76436	0.96765	2.14613	2.01847	1.39749	0.296538	0.719585	1.0931	1.01741	2.3056		0.627009	0.982541	0.459885	-0.0866242	0.00881719	0.515575	1.48254	-0.255426	0.263268	-1.70649	0.268656	-0.824365	0.68869	0.704401	-0.415742	-0.663755	0.0229553	-0.0224326	-2.07256	-0.198897
144	1.2222	0.530042	-0.24423	-2.61625	0.54376	1.24535	0.00952967	1.13082	0.565039	2.00323	1.82341	-0.161157	-0.975182	-0.0553799	1.21096	0.126911	1.91306	2.69877	0.437134	0.171284	2.65782	1.6401	1.92039	0.177543	1.31817	-0.190937	0.823526	3.09885		-0.150657	0.192971	0.911235	-0.552285	-0.109856	-0.736831	-0.170346	-0.391057	0.812147	-0.125477	0.55879	0.0488589	1.26304	-0.563177	-0.0726169	-1.40096	0.972102	0.40216	-2.27738	-0.826439
145	0.189683	1.12529	0.454783	0.165259	0.0258566	0.708237	0.228196	0.845565	2.04349	2.21824	0.441566	0.338653	1.24965	0.328984	1.36017	0.0388143	1.43609	2.91185	1.35419	0.581812	1.53554	1.82225	1.03599	0.709266	1.9703	1.11981	1.41661	2.04546		0.949551	-0.645313	1.59881	-2.40065	-1.75339	0.297146	-0.441972	-0.139301	-1.05677	-0.320055	-1.05609	0.153318	-0.581736	0.818593	-0.984889	-0.627105	-0.28817	0.745189	0.516166	-0.795827
146	0.951281	-7.63103e-05	1.57108	0.503518	0.830394	0.707439	0.906574	0.73716	1.29564	0.872142	0.519468	0.850596	-0.103067	0.663098	1.94191	-0.330708	2.58715	3.47469	1.12903	0.78781	2.11227	1.2572	1.16433	-0.103501	0.404654	1.6729	0.388299	2.26697		0.925309	0.434365	0.700284	-0.578715	-0.792125	0.0100835	0.540394	-0.975832	0.746199	0.30401	0.108055	-0.401118	-0.707524	-0.711545	-0.649054	0.15766	0.371732	0.810234	-0.893769	0.216907
147	2.23319	0.00371129	0.1289	0.278697	0.646972	-0.62514	0.754035	1.91144	1.61993	1.90614	0.191002	0.402427	-0.208793	0.973149	-0.62641	0.193707	1.305	1.19479	0.591139	1.21349	2.38898	1.51952	0.340215	0.733276	1.29747	1.69903	1.66393	2.50943		-0.253372	-0.335281	0.825261	-0.939327	-0.862503	-1.45443	0.521133	-0.4043	-0.639723	-0.273916	0.229817	0.774812	0.129607	0.747491	-0.712168	-0.263464	0.48704	1.24746	-1.04004	-0.733472
148	0.418251	1.51634	0.0660196	0.134067	1.25321	1.08726	1.05533	1.10037	1.12447	2.83004	1.65762	0.632549	0.602735	1.04631	1.2032	0.25375	2.93615	2.16471	0.77943	1.70892	1.79127	1.73623	-0.0821213	0.329713	0.799733	0.78386	2.1746	-0.0721876		-1.38808	0.145905	0.947438	-0.440274	-0.265856	0.754223	0.157814	-0.091213	0.942042	0.926776	1.07959	-0.51416	-0.547398	2.11426	0.35224	-0.492807	1.10907	0.917754	-2.10197	0.00431091
149	-0.0133929	-0.155072	1.75863	-0.0748346	-0.285897	0.993145	0.294235	1.49146	2.74187	1.63274	2.0046	0.21907	0.0345364	0.610479	0.808622	-0.404796	0.958848	2.548	0.581531	1.49793	1.97214	1.35455	0.317041	-0.509664	1.25499	1.3535	1.84922	2.53126		-0.985813	-0.328356	1.10418	0.108366	-1.23918	0.736047	-0.802645	0.397295	-0.0278732	0.647398	1.21353	-0.248831	-0.948168	-0.443269	0.749814	0.730527	0.852409	0.912634	-0.225274	-0.713182
150	0.763158	1.6485	-0.0553138	-0.119763	0.852239	0.947959	1.05706	0.900787	2.06538	1.90872	2.25426	0.182045	0.149209	1.32203	1.43938	0.850126	1.99911	2.41634	1.82243	2.52076	2.31335	0.90699	1.14907	-0.349607	0.942945	1.338	-1.05223	2.24345		0.771477	0.780044	0.631716	-0.465994	-0.898736	0.856366	-0.170169	0.332731	0.585838	-0.966654	1.42474	-0.976064	0.950106	-0.657467	-0.63651	-0.633565	1.30703	1.23151	-0.458396	-0.694289
151	0.208688	1.38783	0.503735	0.711746	1.00833	1.54982	0.588941	-0.595537	1.70394	1.84396	0.329287	0.280415	0.392773	1.19413	0.511163	0.710366	1.65172	1.55691	2.02343	2.92957	1.3937	0.99977	0.580721	-0.00103322	1.07451	-2.72882	1.69463	1.85492		-1.04451	0.314187	0.039656	0.198138	-1.56296	-0.157343	-1.99794	0.505628	-0.542546	-0.18088	0.825865	-0.003197	0.412728	-0.515685	-0.31353	-0.669449	0.723144	0.406513	-0.945524	-0.0318374
152	1.24586	-0.203782	0.998607	1.53477	0.292738	1.56141	1.32578	1.3346	0.566628	2.26444	1.13977	-0.0485188	0.932787	0.603059	1.20667	1.10912	1.92223	0.098664	1.93674	1.07739	1.49976	0.845457	0.867064	-0.529812	0.922533	1.56787	1.68359	1.91554		-0.713894	0.297572	0.879039	0.558671	-1.43671	0.56737	-0.350988	0.0453104	1.31077	-0.597558	0.156141	0.684603	1.16552	-0.408421	-0.622406	-1.38731	1.31692	0.517327	-1.63181	-0.397256
153	0.440102	-0.314181	0.487377	1.01947	1.70519	1.19366	1.21857	2.72214	0.878116	1.59794	0.0343655	0.0561689	1.15737	1.08889	0.932745	1.33315	1.83684	3.32076	1.51398	0.0151272	3.64735	1.6673	0.693139	-0.325506	0.754946	1.37275	1.42127	1.79013		-0.130264	-0.448226	0.267328	0.309808	0.0118167	1.51854	-0.406518	0.144066	1.44411	0.537691	-0.525016	0.107212	0.394516	-0.300042	-0.48976	-0.365207	-0.315418	0.390828	-0.0427104	-0.337696
154	-0.197641	1.11066	0.786928	-0.114759	0.955846	2.87216	0.982195	1.54534	1.17047	1.95877	0.0175405	-0.557715	0.39576	0.779245	0.974677	0.00561631	1.08874	2.94057	1.14811	0.66168	2.38469	1.35752	0.20174	-1.61278	-0.354133	0.586304	1.39584	2.4269		1.43139	0.00123274	0.325116	-0.536053	-0.376576	-1.18467	0.75395	-0.508609	0.505584	0.681075	1.23358	0.396274	1.25751	-0.359154	-0.58162	-0.291535	1.46728	0.787423	-0.386511	0.00593603
155	1.3483	1.16849	0.77117	0.119778	1.64502	0.216092	1.10772	1.46062	0.692272	0.774253	1.41896	0.318926	0.377172	0.617248	1.61574	1.23409	1.14584	2.25193	1.76811	0.423677	1.23152	1.19149	0.147275	-1.11377	0.264124	0.94054	0.96983	2.67773		0.622883	-0.288444	-1.21207	-0.144308	-0.131251	-0.348198	-0.721637	-0.0901088	0.098644	0.901611	0.227639	-0.185074	-0.226932	-0.371156	-0.11989	0.450993	-0.841446	1.17815	-1.36172	-0.790392
156	1.41983	0.742827	1.08117	0.0460715	0.375879	1.07281	1.90325	-0.21055	1.27668	1.3704	0.408134	-0.188147	-0.0169677	0.211953	1.02615	-0.0914543	2.23072	1.46559	0.929959	1.28632	1.93452	1.44101	1.13375	0.878976	0.726034	1.48337	2.41664	2.23655		0.269542	-0.0763952	-0.311183	-0.847817	-0.848187	-0.22754	-0.400441	0.271225	2.17235	0.262594	-0.39117	1.1656	-0.374901	-0.457345	-0.773959	-0.54682	0.527016	0.822494	-1.21154	-0.726908
157	0.696727	1.4911	0.990371	-0.423362	1.0431	0.371513	2.20074	0.722141	1.14878	2.10996	-0.157755	-0.437267	1.76523	0.322524	1.10946	-0.263596	3.79454	1.90053	1.41395	1.7356	1.68625	1.17761	1.41402	0.140047	2.60062	1.24456	0.941617	2.8017		-0.839178	0.472087	1.11459	-0.822412	-0.430411	-0.0346801	-0.337508	-0.0457775	0.599877	0.674368	0.543327	0.456014	0.395626	-0.316413	-1.32988	-1.33719	0.598897	0.208438	-0.917942	-0.410339
158	1.73195	2.14105	-0.179119	-1.78385	0.551953	0.0744672	1.07954	1.30778	1.61891	0.563755	1.49381	0.4326	1.06718	0.520818	0.58727	0.853978	2.28863	1.80242	0.689295	1.56151	1.73215	1.20025	1.42841	0.250213	0.869357	1.84554	1.49501	3.49781		0.438738	-0.119642	0.179628	0.206664	0.701001	-0.00374404	0.700003	0.122289	0.442129	0.188952	1.42892	0.992735	0.477259	0.916504	-0.59468	-1.67138	0.00927666	0.946208	-1.26288	0.722717
159	0.679335	1.10605	0.668606	1.71349	1.51961	1.90182	0.458227	1.03507	0.289353	1.77471	1.73703	0.286706	-0.203837	1.61343	0.62993	-0.263692	0.898869	0.878553	1.33222	1.15046	1.80557	1.37864	0.296673	-0.644218	1.75555	1.61607	1.50448	1.30545		-1.52095	0.162318	-0.687991	0.492487	-0.1356	1.49959	1.69185	0.0260478	-0.218294	0.833254	0.289036	1.06075	-0.0803146	0.490088	0.457405	-0.457063	0.977733	0.0456445	-0.172105	-0.372962
160	0.799807	2.35159	-0.149733	-0.948787	1.22579	0.60365	-0.0650546	0.3214	1.21198	1.40235	1.6505	-0.39621	1.58488	1.12168	1.58726	0.685685	3.18484	2.55853	1.55927	1.34847	2.68925	0.51072	0.494294	0.475171	0.253438	1.12724	2.26035	2.47058		0.25797	-0.639212	0.86064	-0.0708614	1.48761	-0.0643257	0.430556	0.526103	-0.74291	0.962448	0.408309	-0.157156	1.06157	-0.104685	-0.542173	-0.291512	0.940115	0.751665	-1.85738	-0.417412
161	0.178631	1.87325	1.29471	-0.592548	0.737164	0.529241	-0.291989	1.22098	1.50928	2.12528	0.330674	0.200933	-0.106347	0.0789391	0.741288	0.584742	1.76921	3.46981	0.00435888	1.54318	2.404	0.543827	0.53138	-0.628133	0.963913	1.46378	1.69412	1.26183		-1.23063	-1.08909	-0.0928716	-1.27291	-1.7595	-0.868613	-1.12387	0.158918	0.173077	0.0605837	0.0531955	-0.469531	0.0674122	0.744081	-0.279376	0.857232	-0.587047	1.32787	-0.942104	-0.592558
162	0.58547	1.92789	0.695263	0.714653	0.534673	1.56462	0.742924	0.158044	1.8026	1.93428	1.25165	0.0398894	-0.0339337	0.535835	0.664483	0.459541	2.36147	-0.00797185	1.2856	0.170672	1.71263	0.954489	0.880871	-0.0685892	1.24033	1.39548	2.11626	2.50702		0.967006	-0.222054	0.534425	0.45762	0.389592	-0.720472	-0.864913	0.457115	-0.180798	-0.415455	0.20515	-0.141358	0.250952	-0.384819	0.142509	-0.696542	1.00949	0.236509	-0.525061	-0.916754
163	-0.165998	1.98363	-0.882848	2.16534	1.04445	0.797818	0.960067	-0.0570163	1.21019	0.46281	1.14351	0.674203	0.756098	1.03883	1.4394	0.871577	2.19316	3.20896	0.198464	1.67137	1.72786	0.874807	0.246982	0.167093	2.50511	1.05705	1.4078	1.99366		0.359946	1.03688	0.434709	0.73254	-1.97138	0.539956	0.331172	-1.22721	0.705423	-0.128972	0.582535	0.755547	-0.621528	-0.885604	0.0105279	-0.963652	1.63417	0.946665	-1.35138	-1.81458
164	0.0277184	2.20662	0.251596	0.700959	1.14705	0.45696	-0.289436	1.3003	1.0848	1.59515	1.30884	0.0626167	0.417696	1.07051	1.64456	0.84951	0.898349	0.775702	0.338544	1.16494	1.65626	0.948895	0.761233	-0.804972	1.17809	0.152417	1.16833	2.86993		-0.962342	-0.590338	-0.69026	-0.236655	-1.70153	-1.70232	-0.347654	-0.522696	-0.14694	0.659802	1.38315	0.806389	0.421092	-0.749003	-0.10839	0.116054	0.844108	0.19336	-1.49338	-0.45953
165	2.04337	1.38201	0.317071	0.0797223	1.11667	0.948813	1.10591	1.40591	1.56824	1.15215	-0.13224	-0.302731	0.51546	1.62463	0.841315	0.516408	0.974517	3.0347	0.608312	1.8821	1.82059	1.21161	0.399095	0.034718	1.29852	1.01565	1.92889	2.72421		-1.38937	-0.995333	-2.03693	-0.511244	-1.89846	0.140337	-0.00620647	-0.0370763	-0.0239482	0.082706	0.232435	-0.112163	-0.146131	1.15531	-0.484422	-0.519374	0.260046	0.231111	-0.877483	-0.346637
166	0.313451	1.14947	0.984622	-0.495056	0.766771	0.383868	0.412767	0.477971	0.995953	1.75267	1.65473	0.765961	1.15664	0.839733	1.12225	0.0846458	1.96764	1.26594	1.13794	2.55299	2.04164	1.31304	0.792393	-0.164918	2.2108	1.28436	0.960673	1.60606		0.0866751	-0.0169983	1.2851	-2.09901	-0.50186	0.908039	0.201074	-0.418534	0.414555	0.410822	0.868402	-1.11459	-0.0506794	-0.944174	-0.577604	-0.0921365	0.895393	0.133879	-1.09393	-0.309566
167	0.118308	-0.334063	0.88436	1.50693	0.033915	1.59133	1.80925	1.17219	0.447631	1.4688	1.75374	0.98978	1.26044	1.30542	-0.133137	0.692428	0.875996	2.30978	0.322597	-0.233656	1.73828	1.48102	0.570415	-0.253834	1.20024	0.489831	1.80232	-1.91748		-0.264603	-1.75153	0.579889	-0.116675	-1.59258	0.642581	-0.367835	0.138731	0.256566	0.209332	0.645912	0.203254	0.736574	0.204186	-0.835122	-1.07968	1.72443	1.43144	-0.0246866	-0.0152672
168	1.03288	0.0543854	2.08543	0.501931	0.35426	1.04378	2.67002	0.715695	0.703959	2.57684	-0.217136	0.203506	0.475107	1.63038	0.56063	0.563208	1.98342	1.73995	1.27538	-0.0999085	1.37343	0.766082	0.566592	0.364384	0.448309	1.36915	1.86698	1.29974		-1.34165	-0.0855093	1.59914	-0.115009	-0.303277	0.394188	-1.03951	-0.438771	-0.0355518	-0.0270751	-0.18489	0.390297	-0.40196	0.871353	-0.637038	0.747363	-0.726395	0.389819	-0.842113	0.0561759
169	1.71927	1.02488	0.871345	1.30603	0.894737	2.62979	-0.165951	0.380162	0.743376	1.41739	1.70637	0.349519	0.730033	1.30946	0.27593	0.464032	3.2255	1.23739	0.861077	1.5407	1.67242	1.18377	1.16633	1.08636	1.48138	1.87802	0.999146	1.78641		0.722586	-0.521173	-0.46117	-0.984334	-0.983312	0.873953	1.07225	0.00965124	-1.05934	-0.895239	0.194102	1.0501	-0.0172011	-0.126098	-2.58196	-1.00763	-0.632197	0.692572	-1.3456	-0.307647
170	1.37491	0.591178	-0.608353	0.0937399	1.40242	2.22765	0.84716	1.2073	1.39665	1.87528	1.19935	-0.48337	0.329345	1.12558	0.865244	-0.131364	0.540338	0.487178	0.488423	0.768443	1.95731	0.76285	0.289442	0.506209	1.09108	1.09729	1.78328	2.32755		0.156324	-1.24102	0.00735547	-0.618697	-1.53547	-1.15275	0.11043	-0.1088	0.606039	-0.370454	0.773731	-0.307027	-0.475266	-0.763596	-0.143339	0.0195879	0.0775737	-0.471839	-1.13348	-0.270902
171	0.898625	1.41342	0.900742	2.02916	0.330005	1.23049	0.855666	0.482349	1.93617	0.986091	0.51315	-0.859464	0.120593	1.78173	0.986347	-0.172729	1.97108	1.98363	1.3007	0.258904	1.32077	1.99726	2.06583	0.0515752	0.947256	1.58415	1.32243	2.14306		-0.499061	-0.550913	-0.0705538	0.284723	-0.0828209	0.774561	0.238526	-0.0286799	-0.824316	-0.379223	0.95409	-0.272879	-0.509158	-0.652191	-1.38448	-0.451687	1.01618	0.637063	-1.41072	0.451778
172	1.9239	0.189859	1.20742	0.150736	1.69046	1.54827	0.709148	0.737007	0.843465	1.239	1.48808	0.419095	0.412986	1.25392	0.707478	0.63015	1.97446	1.901	0.211597	0.672506	1.58231	1.22161	0.574887	-0.53916	0.484065	1.72815	0.872267	1.27975		-1.07893	-2.26681	1.78253	1.09135	-0.728966	0.637588	0.636735	-0.304233	0.0802889	-0.585469	-0.0536407	-0.493506	0.217909	1.57304	-1.05937	-0.338612	1.30225	-0.137299	-1.09502	-0.543354
173	0.202072	0.617726	1.23702	0.680506	-0.0309345	-0.229968	0.505157	1.43973	0.300304	-0.803359	1.42175	-0.0223666	0.854198	1.37588	0.593437	0.826103	1.73738	2.45301	1.13131	-0.43112	1.58332	0.975134	1.05331	-1.15787	0.694147	1.73237	1.88582	-1.15894		-1.944	-1.10892	0.615329	0.191451	-0.821889	0.130315	-1.08035	0.284784	-1.62868	0.819953	0.367823	0.0392538	0.550803	-1.15462	-0.555715	0.211557	-1.78146	0.146851	-1.31788	-0.145778
174	0.868013	0.272306	-0.134967	-1.19139	1.22477	-1.02097	0.470864	0.576958	0.119231	1.5368	1.2726	-0.0969092	1.0773	0.699454	0.332949	0.671721	1.75754	1.33595	-0.0123999	0.927419	1.11337	0.485544	1.82369	-0.545366	1.79358	0.0634659	2.2621	1.66699		-0.711712	-1.08142	0.134936	0.744479	0.0432242	-0.07651	0.508312	-0.981113	-0.0757325	0.130632	0.300982	0.167062	-0.89503	-0.956891	-0.0928607	-0.421651	0.706648	-0.783879	-0.0100451	-0.0721008
175	1.36105	0.418411	0.599987	-1.11585	0.597544	1.49584	0.051404	0.397029	0.73783	1.4926	0.994786	0.875377	-0.187602	1.74528	-0.15042	-0.328474	1.60425	1.32002	0.316583	1.15621	0.492851	0.527693	0.341661	-0.763698	1.04359	1.20802	2.93427	1.91496		0.297186	-0.465938	0.0845823	-0.907991	-0.254759	-0.392366	-0.0443918	-0.829162	-0.213654	0.282396	0.0343717	-0.729462	-0.327556	0.571645	-0.853847	-0.462174	-1.69591	0.702946	-0.579095	-0.294489
176	1.99008	-0.315488	1.12644	-1.07284	-0.49113	0.77292	-0.00106542	0.086009	0.20836	1.77728	0.99453	-0.663083	-0.167125	2.21574	0.98291	-0.128191	1.74305	1.91798	0.629522	1.54235	0.948194	0.492269	0.0363626	-0.114091	-0.430526	1.46345	1.67993	2.71818		-0.656876	-0.169601	0.697754	0.806901	-0.833403	0.879335	0.346979	-0.836603	0.803531	0.441499	0.568453	-0.532773	-0.355344	-0.0723141	-1.06771	0.324178	0.00469149	-0.28977	-0.924299	-0.317389
177	0.489438	0.876465	-0.0444764	-1.92256	1.49931	0.760805	-0.981945	-0.0896625	2.08918	0.555231	0.255204	-0.241305	-1.63016	1.57987	-1.43065	0.844587	0.820944	0.794949	0.173766	1.3119	1.22085	1.57235	0.704486	0.184576	1.20815	0.83772	1.45644	2.11696		0.85689	0.391601	0.951978	0.977974	0.383931	0.0602523	0.634849	-0.174846	0.642324	0.149667	0.00898295	-0.616235	-0.0131066	0.0390923	0.081603	0.0300605	0.931841	0.0824421	-1.55676	0.341363
178	1.02831	-1.44855	0.208486	-0.176443	-0.0291591	1.06227	0.82486	-1.39409	1.2618	0.201852	1.03453	0.729373	1.25198	0.887563	1.04821	0.186687	1.32763	2.12728	-0.0859337	1.80654	2.02785	0.497192	0.56246	0.957573	0.54501	0.993822	-0.0622398	1.2775		0.669371	0.162909	-0.724348	-0.75862	-0.834944	-0.400914	0.108252	-0.218054	-0.168025	0.898796	-0.0659005	-0.206346	0.125081	1.01961	-0.0349235	-0.57492	-0.0879218	0.427997	-0.363656	-0.61344
179	1.36669	1.63891	0.599498	-1.6251	0.841155	0.125032	-0.152385	0.732343	0.505467	1.45021	1.8806	-0.198297	0.854251	1.366	0.811757	-0.0133363	1.30575	1.19717	1.02762	0.914784	0.867119	1.49388	0.910745	-0.229409	0.391968	1.00145	1.20963	1.01344		0.302219	0.41397	-0.329161	-0.0222467	-0.193161	1.84383	0.22785	-0.67224	0.937465	0.960038	0.670909	0.426743	-0.699624	-0.244705	-1.28557	-0.989123	-0.446052	0.450124	-1.29957	0.318773
180	1.45619	0.999916	0.347014	0.835261	1.89636	0.855324	1.04087	0.968131	1.17502	-0.117058	0.286016	0.158827	0.77797	0.538681	0.89494	0.578399	1.44601	2.13429	0.0225631	0.927222	1.61273	1.54405	0.29553	-0.477173	1.33576	0.917314	0.593191	1.34089		-0.0938027	-0.0844863	0.579063	-0.0265985	-0.555504	-0.311836	0.134893	-1.19056	0.874477	-0.212238	0.491372	-0.197611	-0.0208583	-0.306641	0.0674365	0.525922	-0.160078	0.535182	-1.76426	-1.41085
181	1.19202	0.766402	0.365746	-0.597347	0.159606	1.17168	1.94173	-0.296944	0.372123	0.668362	1.42378	1.07592	0.699012	0.0325224	1.00556	0.37945	1.59	1.38439	0.928697	-0.548062	2.45186	0.537104	0.217349	0.543867	0.482826	1.47898	1.75155	2.47601		-0.110289	-0.427397	-0.247219	-1.09525	-0.916091	1.56471	0.762786	0.531034	-0.437902	-0.150876	0.643554	0.426144	-1.03712	-1.19122	-0.878658	-0.289565	-0.234543	0.0867062	-1.15118	-0.472773
182	1.46544	1.1639	-0.638621	-0.790414	0.496601	0.692303	-0.505044	0.881722	0.866286	1.84381	0.376617	-0.557968	1.2978	1.19417	0.615647	0.0397214	1.4449	0.819159	1.83779	1.08752	1.53083	0.137694	0.993183	0.574193	0.278382	1.60417	0.971267	1.4351		-0.782191	0.118044	0.280963	-0.289893	0.171776	0.272845	-1.73605	-1.1389	0.706735	0.533272	0.668396	0.485489	0.469028	0.316612	-0.786804	-0.178169	1.804	-0.473085	-1.8186	-0.554196
183	1.46244	0.168822	-0.62019	-0.893795	0.316114	1.61776	0.794621	0.326001	1.95901	1.05852	1.5894	0.556146	0.307253	0.912347	0.313723	0.655741	0.886748	1.08578	0.243123	1.30653	0.389947	1.46946	1.3626	0.638726	0.227159	1.03381	1.53251	2.35416		0.0345533	-0.0205544	0.857482	0.757447	-0.244375	0.219541	-0.463371	-0.740288	0.134326	0.236187	0.553285	0.25646	0.19607	-0.0378927	-0.770185	-0.710855	0.835902	-0.250916	-0.81776	-0.52083
184	0.704851	0.704908	0.466774	-0.017947	-0.714736	1.20043	0.515737	-0.535409	0.907775	1.22773	0.766109	0.193751	0.178915	1.29925	0.503055	0.615449	0.29475	1.08441	0.61499	0.36301	0.800423	1.55666	-0.00829879	0.255355	0.896531	0.613209	1.77233	0.892332		-0.160183	-0.0394055	0.859328	1.77402	-1.87917	-0.1596	0.565926	-0.0649238	0.0785798	-0.369219	0.457621	0.125082	0.725825	0.586522	0.112843	-0.313921	1.26467	-0.23038	-2.71149	-1.51212
185	0.524289	0.826563	-0.275672	0.188961	0.610343	0.0934221	0.457595	0.0197544	0.306187	1.64331	0.139279	0.0606449	-0.135723	0.0208199	0.111849	-0.519627	2.16322	1.62872	1.07117	0.907851	0.98627	0.334841	0.960338	-0.142649	0.870746	0.42335	1.26133	2.30398		0.123365	0.171981	-0.476118	0.41779	-0.303154	-0.0626985	-0.421919	0.463951	-1.14598	0.617425	0.856756	-0.309695	0.739421	-0.0472378	-0.745286	1.01093	0.697141	0.609707	-0.845785	-0.454484
186	-0.0302378	-0.815824	1.29988	-1.51646	0.349974	1.68127	1.02276	1.47373	1.2373	0.522416	1.27224	-0.327004	-0.288648	-0.137095	0.88115	0.722763	1.88787	0.404384	1.5975	0.38796	1.03223	1.71264	1.03368	0.510975	0.261574	1.58625	1.28362	1.20431		0.290646	0.122615	0.894887	1.27282	-2.2923	-0.151208	-0.708043	-0.120566	-1.03736	-1.03164	-0.0708805	0.564744	-0.116848	-0.441587	-0.696679	-0.201719	0.718706	0.0209646	0.0512414	-0.106072
187	0.83316	0.479784	0.663463	-0.584357	-1.75696	0.759268	0.0352697	0.486442	0.405184	1.51701	1.3222	0.430884	0.539642	1.16978	1.08835	0.316694	1.88929	1.91698	1.12375	1.66854	1.09873	1.00164	0.086235	0.414616	0.572627	1.85109	1.58418	0.175911		0.321286	0.118102	-0.780031	1.01633	-1.1532	-0.270048	0.114772	0.14702	1.3133	0.423844	0.799399	-0.404655	0.39288	-0.495197	-2.13152	0.189187	1.2151	0.42095	-0.382373	0.419895
188	1.6243	1.35885	1.20637	-0.82699	1.34232	1.78329	1.13445	1.0599	1.04705	1.08548	1.19177	-0.388005	0.691771	1.46804	0.293121	-0.614893	0.282604	1.61695	0.808194	0.14316	2.31869	0.91637	0.405869	0.826646	0.754313	0.986216	2.00332	2.45522		0.122779	-0.235537	0.325648	0.168681	-0.92749	0.683601	-1.07916	-0.0648122	1.06279	-0.478285	0.00187072	0.277854	0.0146659	0.231942	0.765283	-0.797574	0.725976	-0.617144	-1.90054	1.06534
189	0.753331	-0.342408	1.30124	-0.141602	-0.0836626	1.28393	0.388696	-0.0205645	0.574436	0.977697	0.504231	0.262744	0.532886	0.891255	1.08207	0.0337207	2.54953	0.75373	0.218437	1.68593	1.60019	1.30651	0.486128	0.505623	0.358991	1.44458	1.74103	2.36609		0.436043	-0.845399	0.0861617	-0.217786	-2.29948	-1.45141	-1.08308	-0.058485	-0.282409	0.492015	0.573548	-0.397797	-0.556792	0.146468	-1.15612	-0.424574	0.297247	0.934163	-0.0750639	-1.25893
190	2.30017	1.63013	0.427659	1.23993	-0.371386	2.66198	0.091944	-0.18397	0.726878	2.02404	1.23665	0.556556	-0.0420781	1.24753	0.522725	0.342511	1.75649	1.82796	1.17725	0.183565	0.525209	0.714734	0.0916776	1.6862	0.154383	1.39452	1.43733	1.02283		-0.277543	-0.116205	0.724699	-1.00194	0.366017	1.3177	0.469604	-0.419601	-1.18693	-0.77951	-0.0319661	-0.290361	0.908133	0.111102	-1.57407	1.70749	0.349402	-0.425462	-0.135174	0.845995
191	0.262519	0.390882	0.109163	0.639131	1.70016	0.873033	-0.57601	0.956281	1.31727	0.772825	-0.097504	0.858669	0.00233281	1.17181	0.0847054	0.605532	1.30472	1.75803	0.693973	0.880446	0.623248	0.952987	0.596173	0.953426	0.851601	1.24174	1.31899	2.65616		-2.17004	-0.567515	0.329192	-1.10863	-0.681604	1.71719	-1.02494	-0.335504	-0.542247	-0.571881	0.380611	-1.00185	-0.349489	0.25624	-0.427825	0.0171258	0.924518	0.56576	-0.932105	-0.458973
192	0.687925	1.05076	0.0680554	0.104517	0.727158	1.47146	0.317463	1.05267	1.39037	0.858	0.259292	-0.121564	-0.0788836	0.985603	1.17518	0.973984	2.59015	1.61254	1.77795	1.663	0.946676	1.0962	0.263767	1.13384	0.488446	-0.703401	0.878369	2.20451		-0.431775	-0.0417014	0.285388	-0.682807	-0.625683	-1.14302	-0.0867469	-0.124855	-0.189644	1.03665	-0.932426	0.137456	-0.414385	0.0295803	-1.02435	0.343183	0.00399376	0.143692	0.331674	-0.532533
193	1.5228	0.813668	-0.0390748	0.386982	0.477083	1.05444	1.07287	0.0733384	0.446364	0.679017	-0.318779	0.695209	-1.52459	0.454134	0.634908	0.260007	1.31542	2.2984	2.33171	1.33244	1.36786	0.812995	0.404885	-0.182986	1.23665	1.76402	0.908887	2.35992		0.7555	-0.517437	1.28745	-0.333365	-1.18331	-0.65169	0.921135	0.142513	0.040915	0.531947	1.22163	1.02058	-0.768704	1.10201	-1.22954	-0.475728	1.21946	-0.167675	-0.640357	-0.41713
194	0.193884	1.56183	1.03437	0.312959	0.828934	0.0748022	0.789967	0.936122	1.10379	0.841666	0.130219	-0.332485	0.134267	0.936416	0.147683	-0.713392	1.26995	1.32799	1.36518	0.645917	1.56357	0.47995	0.810267	0.21007	0.672023	1.04764	0.875466	1.15181		0.0493142	0.627035	0.987065	0.319387	-0.369409	-0.962158	-0.0395772	-0.922486	-1.47899	0.707313	-0.154959	-0.174804	-0.271036	0.348301	-0.236997	1.10118	0.823221	-0.131504	-0.980325	-0.376011
195	1.49048	0.872487	-0.263155	-1.05095	-0.0467352	1.0779	1.43607	0.628833	0.0844422	1.10738	0.671052	0.786151	0.0109923	0.772477	1.99106	0.18028	1.6132	1.30392	1.42665	1.54623	1.88122	0.785903	0.853201	1.71029	0.0550059	-1.08462	1.82493	1.39984		0.0203861	-0.955117	0.647089	0.719039	1.36834	0.42909	-0.300426	0.0245068	0.253419	-0.168981	0.191299	0.434206	-0.870092	-1.68081	-0.621243	-0.602429	-0.043279	0.704178	-0.0692407	-0.147054
196	1.90469	0.615046	-0.210957	1.03353	1.40855	-0.457014	0.337183	1.5678	0.359115	1.34306	0.309414	-2.28163	-0.827306	1.04388	0.738167	0.00416352	2.00516	1.90843	0.175047	2.06468	1.22093	1.02431	1.51646	-0.068494	0.509023	1.26245	0.95722	0.801048		-0.154458	0.742469	0.978586	0.845789	-1.61831	0.680805	-0.0250583	-0.753215	0.174791	0.100898	0.716164	-0.0891462	-1.71877	0.281106	-1.66579	-1.54914	0.62457	-0.131111	-0.320473	-0.466718
197	2.18629	0.605556	0.180062	0.604678	-0.166664	-0.0722278	0.98696	0.445826	1.81025	0.629999	0.199987	-0.311549	-0.291705	-0.214565	0.412724	-0.341523	1.20016	0.541642	0.790582	0.157223	0.615011	1.22336	0.355433	0.699449	0.148427	0.629548	0.719693	2.71308		-0.511123	0.329504	0.80471	-0.982013	-0.236062	1.52831	0.246462	-0.904432	-0.846656	-0.546337	0.111003	0.442351	0.123634	-0.20211	-0.680787	-0.538122	0.999846	-0.000632659	-0.642049	0.0737069
198	1.34493	1.47872	0.345284	2.40231	-0.179244	1.09077	-0.442137	0.812422	1.12187	0.792835	0.496552	-0.0262838	1.64349	0.902999	0.675602	0.533002	1.35014	2.17682	0.552496	0.856463	1.97076	1.48005	0.47103	-0.560346	0.323028	1.50516	0.332274	1.16337		0.940743	0.00887499	-0.055252	-0.801968	-0.47079	-0.00537315	0.0575907	-0.214309	-1.41093	-0.203348	0.0908144	0.372525	0.216041	-0.809197	-2.37144	0.195396	0.870207	-0.498415	-1.28877	0.221561
199	0.911018	0.862739	0.236341	1.99422	0.356972	0.532806	0.200012	0.262879	0.931886	0.798331	1.55118	0.894726	-1.66788	1.7113	0.317759	-0.383697	1.51826	1.42504	2.46091	0.569295	1.20658	-0.164714	0.374668	-0.356636	1.50438	1.05581	0.608714	0.813637		0.291386	1.36433	0.417697	-0.751899	-1.56971	0.145241	-1.16467	-1.09121	0.743604	-0.648426	-0.143841	-0.0928698	-1.21472	1.02267	-1.21506	-1.08735	1.1765	-0.00517238	-1.67636	-0.496746
200	0.701942	0.635321	-0.418684	-0.368629	0.891115	1.75378	-0.141269	1.32872	0.589546	0.798648	0.878584	0.3791	0.783944	1.68617	1.16903	-0.643886	1.59657	1.3905	1.53577	1.53697	0.769584	0.51341	0.942116	0.314195	1.59611	1.77434	2.03403	-0.172972		-0.284787	-0.00803593	0.103927	1.18641	-1.05427	-0.296343	0.640399	-0.530979	0.330793	0.115836	-0.663965	0.264828	-0.370961	0.838284	-0.77279	-0.452331	-0.722838	0.558625	-1.23842	-0.678226
201	2.0707	0.0723504	0.121172	1.36503	0.982353	0.202151	0.277891	1.6291	0.599578	1.09547	0.783602	-0.67028	0.917396	0.690273	1.22925	0.0646661	0.762669	0.976017	1.10952	0.43678	1.42752	1.12334	0.00516667	0.245866	1.15024	1.39187	1.04985	-0.959296		-0.417629	0.748632	0.192955	-0.0510275	-1.14093	1.99795	-0.434272	-0.518041	0.113771	-0.927615	1.51135	0.402983	-0.5273	0.352829	1.35085	-0.087253	1.23489	0.21211	-0.594167	0.25966
202	1.66368	-0.736268	-0.371378	0.854329	1.21531	0.939536	0.516297	-0.539581	1.60516	0.696506	0.313321	-0.651298	-0.207168	0.724041	0.233905	0.000968784	1.33583	2.8371	1.65996	0.827219	0.606502	1.56395	1.36193	-0.61598	0.243875	2.13885	0.878691	1.96966		-0.365602	0.033882	0.129144	0.104587	-1.90673	-0.930784	-0.566019	0.109624	-1.36902	0.223747	0.588211	-0.409849	-0.57523	0.561164	-1.12285	0.492173	-0.615396	-0.0891627	-1.61111	0.729351
203	0.125871	1.45911	-0.370541	-0.966135	1.32557	0.889804	-0.220381	1.03534	1.66653	-0.482661	0.83057	-0.911364	0.241653	0.736287	-0.898836	0.16241	2.19256	0.415647	2.11518	1.04164	1.73208	0.0207071	0.853067	-0.670089	0.896546	0.957707	0.175396	1.60581		0.300508	-0.0514828	0.998837	0.14202	-1.21219	0.817019	-0.162925	0.170902	-0.229068	-0.081458	0.193458	1.0422	-0.0440617	1.17981	-0.687202	-0.240434	-0.825471	-0.406319	-0.238843	-0.0604544
204	1.74257	-1.50237	0.112366	0.114639	0.052758	1.31374	-0.53795	0.520906	0.194893	1.56607	1.18383	0.287694	0.422274	1.85388	0.760394	0.130776	1.05908	0.0108185	0.807591	0.575382	1.96702	0.903152	0.878569	-0.356378	1.02093	1.62863	0.463786	1.04976		0.581436	-0.343445	0.492224	0.0240064	-1.3915	-0.442964	0.577672	0.284927	-0.391347	-0.279751	0.362726	0.685468	-1.31056	-0.153704	0.230792	-1.35937	-1.54125	0.106149	-1.00513	0.392464
205	0.538087	1.72513	-0.453651	1.12405	-0.93826	0.237657	1.54094	0.621102	0.866434	0.915887	1.04684	-0.364729	1.36306	0.597743	0.0101134	0.249681	0.458081	2.07795	2.73652	1.04243	1.55104	1.02046	-0.189102	0.382999	1.31887	0.857141	0.518981	-1.11654		0.48037	-0.0803033	0.0448842	0.779094	-1.12895	0.432738	0.496824	-1.29316	-0.484823	0.62598	0.382543	-0.580943	0.154223	0.451271	0.166042	-0.502968	0.4595	-0.0517381	-0.797735	0.0685379
206	1.00996	-0.055534	-0.0144011	0.0653917	0.860593	1.66524	1.07913	0.831511	0.733895	0.820979	1.68531	1.00639	0.788356	0.520287	0.5691	-0.143796	1.9387	0.839727	0.708487	0.594445	1.42454	0.299469	0.995662	1.14426	0.824561	0.928394	1.53477	2.18202		-0.543032	-0.0981669	0.143318	0.854987	0.0783005	0.642328	-0.7227	0.820857	-0.0820866	1.20887	0.482561	0.278247	-0.187901	0.610873	-0.0376221	0.0179679	1.06866	-0.208411	-0.33163	0.191311
207	0.118322	0.591055	-0.241434	-0.903414	1.41967	0.948861	-0.383254	0.419223	1.15298	1.24887	0.877759	0.785447	0.849581	1.41642	1.0974	0.653541	2.20751	1.54005	0.581336	1.00426	0.924977	-0.167085	1.0296	0.234137	2.0326	0.715479	1.33415	1.85307		0.113651	-0.266767	1.1002	-0.357955	-1.35339	-2.18342	0.949927	-1.63975	0.479359	-0.1421	0.300004	-0.19205	1.08373	-1.50191	-0.440056	0.446968	-0.235883	0.746221	-0.768144	-0.210638
208	0.878334	0.592091	0.848612	-0.0905174	-0.342948	1.06345	0.386042	0.904001	0.237366	-0.772903	-0.110751	-0.269981	0.906764	1.3621	0.363531	0.499724	2.17162	0.992781	-0.135372	0.578535	1.65708	0.53876	1.37129	0.11053	1.95918	0.736099	0.950173	1.99093		0.0635406	-0.415764	1.08183	-0.823361	-1.26981	-0.108654	-0.34108	-0.14612	-0.845379	-0.202584	0.957358	-0.379389	-0.443337	0.431345	-0.299043	-0.135075	-0.0510591	0.165614	-0.732037	-1.7006
209	0.272871	1.27025	-0.126956	1.10649	-0.631433	0.605158	0.991002	0.853723	0.70452	1.13548	0.826524	0.622751	0.952947	1.006	0.404451	-0.231301	2.59334	0.953482	1.13028	-0.123741	1.70365	0.896134	1.44793	-0.967536	0.525332	1.34599	1.33907	1.67109		-1.59131	0.444145	-0.222301	0.143328	0.625911	-1.91823	-0.633422	-0.675947	1.24459	-0.817321	1.41439	-0.00673072	-0.385235	1.64013	-1.43978	0.937002	0.951655	-0.292455	-1.26728	-0.535024
210	0.551294	0.301315	-0.96184	0.164666	1.30084	1.32756	1.02198	0.813945	0.585048	0.94178	1.08799	0.840463	0.0598885	0.472423	0.905687	0.256719	3.1894	0.0202994	1.63294	0.72794	1.23829	0.310973	0.294846	-0.369253	0.840216	0.254222	-0.703888	0.97609		-1.01377	0.146193	0.0346032	-0.718692	-0.540737	0.164145	-0.648715	-0.586092	0.289986	0.576412	0.655571	0.303126	-0.553232	-0.012667	-0.980271	-0.614141	0.2503	0.443198	-0.903667	0.619352
211	0.501962	0.188715	0.524068	0.279657	0.457626	1.09561	0.8533	1.47486	1.21917	0.243918	1.43571	-1.07691	-1.29154	-0.414637	0.744273	-0.223589	1.18291	-0.376258	1.09643	1.08478	1.14917	-0.0245981	0.380608	-0.677159	-0.130281	1.16993	0.195645	1.94642		-0.805036	-0.696556	-0.885099	1.88769	-1.02944	-0.0535675	0.60359	-0.266917	0.749721	0.288824	0.90116	0.0903831	-0.123124	0.796856	-0.304424	-0.933194	-0.00638457	0.339409	-0.902091	0.576821
212	0.963084	-0.235927	-0.564576	-0.518572	0.521244	1.24263	1.52837	0.962824	1.85698	1.70796	0.199294	0.951566	0.24199	0.818371	1.16005	1.138	1.51251	2.32703	1.18652	0.187263	0.775242	0.456331	0.201684	0.883686	0.736131	1.35219	-0.492692	1.85801		0.123457	-1.42997	0.236953	0.16143	-2.36917	1.6724	-0.549234	1.28839	-0.437988	0.196487	0.48909	-0.646145	0.227881	0.314359	-0.335023	-0.828575	0.453128	-0.145802	-1.02991	0.88867
213	0.0854333	0.0353857	-0.0464631	0.588844	-0.0489312	-0.00340911	0.878036	-1.39969	-0.140122	2.22533	-0.0164124	0.332162	0.378076	-0.171921	1.69499	0.146533	1.50489	0.87003	1.46598	0.478097	1.13009	0.899685	-0.133982	0.184443	0.267363	1.46084	0.949172	1.78846		-0.966521	-0.39857	-0.784938	0.268454	-2.07309	0.448439	0.36552	0.326721	0.355969	0.139756	0.593875	0.414673	-0.259835	0.650162	-0.694906	-0.581742	-0.503018	-0.292016	-0.626601	-0.188113
214	0.283147	0.0874415	-0.769151	2.04435	0.0548117	0.356148	1.08139	0.337272	1.16606	1.33983	0.790044	0.668761	0.612429	0.606975	1.67658	-0.790601	0.343076	1.76031	1.21981	2.04753	1.74529	0.120755	0.719116	0.326824	-0.409255	1.01325	0.392921	1.44556		-0.371099	-0.26142	-0.469275	0.753199	1.02141	2.30269	0.0990866	-0.724801	0.00537004	-0.0608147	0.828928	0.00390323	-0.38814	0.494217	-0.771496	0.557215	0.222457	0.886585	-1.08013	0.0802924
215	0.606962	1.74559	0.508289	0.290852	-0.441575	1.06995	0.668046	0.413362	0.866501	0.787726	1.94627	0.0638288	0.0742565	0.709471	1.26191	0.597179	2.94032	1.11464	0.490839	0.241433	0.946155	-0.220362	0.503932	0.823033	0.554537	1.15383	0.382473	2.00159		0.514588	0.810171	-0.740275	-0.227929	-0.562221	0.49788	0.663801	-0.385888	1.17212	-0.0654123	0.901488	0.276242	-0.281717	0.345483	0.451251	0.0349871	0.652465	0.34321	-0.5114	1.00855
216	1.24076	1.01766	0.0870776	-0.960687	0.998923	1.14869	0.712586	0.563712	1.7872	1.45164	0.820135	0.714321	1.64669	1.25648	0.930493	1.11133	2.26672	1.83971	1.17833	0.216289	1.15994	0.452749	0.828803	0.178656	1.20944	0.999301	1.19087	-0.91869		-1.25658	-0.140546	-0.1106	1.13897	-0.751709	0.477908	-0.674066	0.0399698	-1.2132	-0.656805	0.908928	-0.537948	-0.518275	0.330048	-0.440156	-0.0741426	0.82676	-0.00457658	-0.382397	0.150038
217	0.273428	0.657059	0.0818734	0.915175	-0.472794	-0.231404	0.459975	0.571876	1.52622	0.972751	0.413049	-0.320225	0.438123	1.14243	0.413038	0.355902	1.80274	1.07901	1.48859	1.37539	1.62194	0.685621	1.22248	0.378106	0.628036	1.01351	0.450207	2.02086		-0.26757	0.361013	0.688217	0.0710242	-0.491357	2.02562	0.292438	-1.22797	1.12247	0.511196	0.432808	0.651532	0.811948	0.413933	-1.04424	0.220365	0.351451	0.810223	-0.372086	0.184574
218	0.583842	0.758621	0.0519062	-1.42952	1.46775	0.44256	-0.378061	1.29835	1.22116	-0.394883	0.208509	0.394167	1.15894	0.0270836	0.357961	-0.162418	0.92823	0.611707	1.93487	1.1748	1.02809	0.868031	-0.720789	-1.8812	0.136071	1.91091	0.800333	1.12368		0.203669	0.73926	0.299462	-0.330716	-0.174717	0.666864	-0.39234	-0.0392134	0.66259	0.581854	0.703487	-0.548706	0.767681	0.329672	-1.26095	-0.453379	-0.073527	-0.267246	-0.677966	-0.0228017
219	0.929608	-0.0641	1.4933	1.23189	1.46928	-0.118984	1.04045	1.48598	1.05308	0.857454	0.298967	0.0508075	0.418371	1.0835	0.485469	-0.423839	2.01824	0.982887	0.329193	0.547265	1.12431	0.51878	0.894927	0.13108	-0.042909	-0.180177	1.33854	2.24183		-0.338491	-0.760927	1.04899	-0.1401	-0.819557	0.453985	-1.999	-0.718406	1.13608	0.538389	0.452541	-0.335256	0.573184	1.86495	-0.233255	-0.463678	0.0134599	1.08616	-0.349952	-0.224007
220	1.71554	0.107244	0.505723	0.731344	0.718938	0.0764668	-0.212475	0.616258	0.271188	0.75247	1.20031	-0.319702	0.617312	-0.0793713	0.449419	-1.23192	1.30649	2.5397	1.23174	1.42258	0.623597	-0.464246	0.42171	-0.299275	2.01131	1.2159	0.522838	0.759847		0.713674	0.426899	-0.0163143	0.552399	-0.593738	1.03394	-0.163107	-0.307375	0.187384	0.0426132	0.729234	-0.801909	-0.0490577	-0.513126	0.274676	-1.26292	0.632631	-0.329692	-0.725636	-0.130625
221	0.338562	-0.0951801	-0.314645	1.04217	0.257009	1.33128	-0.970755	-0.0477405	0.53589	0.215031	0.281761	0.0657488	0.899034	1.13104	-0.489511	-0.647477	1.50432	-0.251936	0.198109	0.714912	0.847587	0.247318	0.40175	-0.0686671	1.22757	1.0523	1.88559	2.29851		0.65814	-0.575812	-0.657351	0.959049	-0.66659	0.488229	0.273501	0.197062	-0.580548	0.237686	1.13213	-0.123356	0.296104	0.633897	-0.987582	-0.354772	0.531453	0.584007	0.0633829	-0.671439
222	0.595479	0.966175	0.499871	0.110691	0.344224	1.46634	0.861856	1.57653	0.493555	1.84489	0.18555	0.294973	1.69377	1.35989	-0.21157	0.134845	0.709579	2.04208	0.671484	0.570699	1.32569	1.22844	0.464062	0.0688342	1.13443	1.37839	1.94436	1.09823		-0.368111	-0.0324426	-0.606473	-0.797909	0.371192	-0.377653	0.337719	-0.424876	1.09041	-0.744977	0.941788	-0.259734	0.1851	-0.433076	-1.49806	-0.450321	-1.005	-0.182323	-1.16546	0.0455555
223	0.385965	1.44127	-0.564442	-0.155164	-0.610913	0.196686	-0.275205	-1.12081	0.849392	1.38231	1.42225	0.0425291	1.29268	0.976239	0.685522	-0.0589063	0.499412	1.45839	0.356028	0.664356	1.69063	-1.43715	0.57257	-1.26994	0.728609	0.77503	1.67253	0.31603		-0.544334	0.180868	-0.209599	0.257536	-0.399231	0.0753292	1.43906	0.203268	-0.114243	-0.689415	1.02445	0.912116	0.893469	0.233673	-0.373761	-0.755877	-0.916999	-0.222447	-0.338584	0.716403
224	0.778972	0.010164	1.15341	0.916535	0.189731	-0.91756	0.528107	0.842889	0.444258	1.55634	-0.563977	-0.27405	0.409699	-0.311295	0.757924	0.296194	1.97423	1.4173	1.15949	0.595752	1.25301	0.890456	0.839985	0.662877	1.0218	0.364489	0.762462	-0.517324		-0.593596	0.33236	-1.60146	-0.943887	-0.233971	-1.68178	-0.480804	-0.364293	-0.0759881	-0.895166	0.793443	0.108172	0.853913	0.0660186	-1.67719	-0.905679	0.930275	-0.0101765	-0.451669	0.0723818
225	0.55099	0.286838	-0.679248	0.635523	-0.238624	1.1725	0.522711	0.81731	0.918263	1.07179	0.792398	0.409079	1.06666	1.49524	0.205029	-0.598902	1.89641	0.29522	1.3294	1.13679	1.22348	0.314285	0.148236	-1.17405	1.75052	1.19607	0.911884	-0.555204		-0.616341	0.35933	-0.0364267	-0.295573	0.797738	1.02992	-0.474211	-0.245108	0.618761	0.129854	-0.000576984	0.178955	0.648124	0.264111	-1.05853	-0.289659	-1.43254	-1.06612	-0.114959	-0.178572
226	0.642467	1.03811	0.372529	3.10935	0.603839	-0.125218	1.36919	0.885057	0.51681	-0.302177	0.459812	-0.104374	0.538242	0.523625	1.30277	-0.867683	0.975453	0.671884	1.25746	-0.121393	0.954635	0.723162	1.06285	0.15295	0.463665	0.966331	1.5963	1.24368		-1.53823	-0.998662	0.319333	1.8721	0.159202	-0.121242	0.111563	0.504055	-0.0555021	0.0950017	0.161607	-1.2374	1.29676	0.00164824	-0.851962	-0.0420461	-0.463488	-0.152011	-0.476384	-0.165654
227	0.149596	-0.319556	0.581501	1.69363	0.552501	0.866373	0.920602	0.733288	0.42393	1.07517	0.859806	0.111932	0.263056	0.00875477	-0.417654	-0.117847	2.15498	0.283913	0.750024	0.740326	-0.000800812	0.111152	0.682038	0.426295	0.645705	1.08352	0.519616	0.974785		-0.766052	-0.393111	0.953208	0.314092	-1.47162	-0.444809	0.905864	-0.180161	1.1356	0.652547	-1.30166	-0.785685	0.922325	0.114216	0.807444	-0.630422	-0.364963	0.85301	-1.43367	0.437678
228	0.517629	0.607745	0.354522	-0.887676	0.554671	-0.183026	0.200219	0.148735	1.08178	0.561593	1.13444	0.48257	0.293272	1.0111	0.520814	-1.23833	1.45287	1.50671	-0.205471	-0.137375	1.00294	1.0717	0.538195	-0.471933	0.908963	1.42068	1.87152	1.54684		-0.472176	-0.749136	-1.19002	0.757992	0.951423	-0.155113	-0.43912	0.2052	-0.139359	-0.823162	0.963732	-0.677707	0.961591	0.321516	-1.14789	-1.07758	-1.03731	0.799439	-1.21997	-0.588608
229	1.27743	0.0223117	-0.560075	0.83065	0.494937	1.18824	1.00631	0.736774	0.692647	-0.548787	0.985463	-0.0567016	0.202098	0.215338	1.0838	0.391277	0.804157	1.05574	-0.46566	-0.359244	1.12481	0.584748	0.919768	-0.260478	1.15097	1.23174	1.36966	2.0358		-1.47154	0.63922	-0.891986	0.135915	0.840381	1.09551	-0.278777	0.161195	-0.615175	0.390322	-0.26558	-0.356351	0.640142	1.56877	-0.282716	-0.140581	-0.722874	0.571775	0.350816	-0.569284
230	0.511626	1.08361	0.952463	0.198252	0.124093	0.374606	0.936649	0.354689	0.697273	0.830358	1.17986	-0.22391	0.687585	-0.224931	-0.487043	0.261648	0.968326	-0.642961	-0.401867	0.232502	1.44433	-0.235309	-0.429985	-0.38748	-0.265176	0.573608	0.920435	0.909565		-0.356304	0.321466	0.349766	0.300777	-0.636916	0.612163	-0.670368	-0.26554	0.245343	0.209172	0.300175	-0.551948	-0.172827	-1.50849	-0.45062	-0.0356182	-0.72547	-0.0401041	-0.785405	0.477947
231	0.893509	-0.45472	-0.372494	-0.312447	0.327191	1.34888	0.328396	0.363036	0.078248	0.592504	0.432223	-0.292437	0.659597	0.628328	0.441228	0.0749409	0.544305	1.59418	0.64623	-0.549555	0.715687	0.359945	-0.756027	0.144471	1.04145	0.795218	1.31005	-0.331896		-0.547667	-0.30358	-0.437303	-1.00194	-0.139918	0.591485	0.287356	0.779738	0.830626	0.682153	-1.32978	0.197017	0.769159	0.927551	-0.00135293	-0.919069	0.00480303	-0.158536	0.961011	-0.00972565
232	2.35341	-0.34711	-0.272237	-1.27248	-0.175665	1.94135	0.861429	0.623881	0.52145	0.808184	0.576172	-1.03426	0.0049528	0.7452	-1.43857	-0.186435	1.78234	1.44315	-0.466358	0.0783256	0.276705	-0.0556639	0.601825	-0.495212	-0.39384	0.713248	1.5097	2.10883		1.32543	0.397983	-0.427715	-0.0503625	-0.16779	-0.42618	0.616543	0.508244	0.0503753	-0.482935	-0.212061	-0.420096	0.530941	0.0301967	-0.989991	-0.248072	0.0401252	-0.287309	0.0306641	-0.234523
233	1.77355	0.213328	0.176047	1.11538	0.137074	0.305808	1.40222	1.59593	0.589665	1.57581	0.530261	0.817361	-0.509692	-0.44784	0.0620883	-0.445187	1.21244	-0.108503	0.414177	0.909563	0.428552	0.445155	0.0299935	0.450138	1.31811	-0.49425	1.72321	-0.0293866		0.532221	0.599877	-0.240404	0.215981	-0.726941	-0.353511	-0.368619	1.01216	-0.096647	-0.866169	0.520238	0.238853	1.87107	0.578092	0.188047	-0.157183	-0.260472	0.25759	0.556071	0.434888
234	0.888395	1.8185	-0.0432112	1.32539	-2.10061	0.723851	0.126217	0.614684	1.60262	1.84644	0.494515	-0.871825	0.00391196	0.472235	1.44968	-0.26709	0.564182	-0.123734	1.69575	0.789394	0.400961	-0.431137	-0.311278	0.662327	-0.264977	1.08611	0.720523	2.00799		-1.15412	-0.868394	-0.589968	-0.0658485	0.423501	1.43401	-0.00324676	-1.23979	1.16333	-0.630657	0.863544	0.343878	0.334721	0.391858	-0.811193	-1.20365	-0.561969	0.352046	-0.507905	-0.114857
235	0.772156	-0.701499	0.247051	1.03222	0.366469	0.502702	0.965443	0.863698	0.882694	1.43675	0.938569	-1.41335	1.37583	0.164984	-0.270387	-0.172634	1.20043	1.59025	0.903251	0.862181	-0.198497	-1.02667	1.02719	-0.397363	0.403654	0.102501	1.58176	1.63985		-1.61519	-1.15132	-1.25882	0.41502	0.225874	-1.46362	0.151849	0.247393	-0.398577	0.0714074	0.595617	0.542464	0.513513	0.238322	-1.0803	-1.29967	-0.0855722	-0.413553	-0.182426	-0.270169
236	1.35693	-0.28271	-0.692783	-1.20454	-0.406105	0.605662	1.5767	0.397847	0.73959	0.994378	0.314995	-0.675626	0.0219736	0.616043	1.56417	-0.0883313	0.636795	1.82599	-0.0781129	0.14422	1.68522	-0.771444	-0.0733366	0.222509	0.705104	0.172756	0.977079	-0.115952		-1.2805	-0.68324	-0.437508	1.79326	0.384709	0.0533791	-0.0138341	-0.236366	1.07381	0.0154157	-0.282068	-0.25894	1.16295	-0.723012	0.279738	-0.412624	-2.13548	-0.556116	-0.710734	0.160424
237	0.564977	0.739646	-0.122679	0.903198	0.557565	0.903263	0.50108	1.09138	0.261424	1.35236	1.01153	-0.141136	0.0951971	1.03389	0.196959	0.522532	1.59752	1.73325	1.09235	0.59065	0.991823	-1.08793	-0.79905	-1.07234	0.303099	0.0409803	0.537072	1.78562		0.621056	-0.0756697	0.53909	0.85838	-1.0407	0.737424	0.244039	-1.04639	0.597211	1.04525	1.00614	0.140985	0.497679	-0.151231	0.197622	-1.06577	-0.248279	0.596306	-0.368415	-0.504728
238	0.0366529	0.285631	-0.565991	1.68221	-0.092635	1.04797	0.484864	0.379184	1.13015	0.923746	1.12853	-0.0358344	-0.43618	-0.269724	0.733005	0.308445	0.487443	1.49696	0.994741	0.363592	1.15481	-1.31991	0.440133	0.081689	0.829256	0.871559	2.52422	0.942884		-0.446155	-0.144366	0.805598	0.673211	-0.533658	1.25444	0.937812	-0.990263	-0.719634	-0.165759	0.724429	-0.396411	1.51468	1.27528	1.0719	-1.20181	NaN	0.177551	-0.400368	-0.402702
239	2.57495	1.72569	0.130691	-0.608202	1.54572	0.3262	0.452486	0.700673	1.1	1.40404	0.45771	-0.0709518	-1.14114	1.28716	0.946592	0.197947	1.29934	0.349744	0.352986	0.0529703	-0.167319	-0.46982	-0.113174	-0.579141	0.434056	0.763108	0.370641	1.65269		0.685843	0.263904	0.677734	-0.0051964	0.875075	0.210142	1.34275	0.142185	0.579597	0.23024	0.0964513	-0.598975	0.559315	0.1203	-0.499527	0.0906462	-0.178538	0.15096	-1.90112	0.0946003
240	1.35801	0.494615	0.262335	0.0358779	-0.385903	0.915753	1.3889	0.460084	-0.393219	-0.0869345	0.129215	-1.35813	0.399776	-0.761847	0.966356	0.178028	0.606497	0.0539179	1.42972	0.921595	0.0784864	0.108352	1.14655	0.625359	0.92675	1.91588	1.0747	1.46331		1.24436	0.163668	0.865055	0.658667	-0.771219	-0.267663	-1.03071	-0.475391	1.2146	-0.672992	0.473767	-0.329369	0.887532	0.851523	-1.22617	-1.62938	0.109996	0.0461492	-0.917579	-0.310562
241	-0.130936	1.60614	0.455654	1.40219	-0.0293946	1.45688	0.815572	0.108571	0.308606	1.04647	0.94096	0.31299	-0.296173	0.818359	0.672026	-1.40947	1.20149	0.68508	-0.634902	-0.256777	0.149302	-0.238624	0.613262	0.0898776	0.319977	0.0747367	0.911573	2.77679		0.678671	-0.722743	-0.0374188	-0.763528	-0.0637805	0.679312	-0.2493	-0.121003	-0.0613586	0.165834	1.74989	1.08288	0.924512	0.141219	-0.278361	-1.13828	0.615273	-0.427542	0.405575	-0.464816
242	0.345011	0.551309	-0.809071	0.518164	-1.52059	0.314097	0.824822	1.51017	0.0668355	1.37075	-0.664047	-0.320365	-0.293373	0.149671	-0.335706	0.364162	1.83683	1.37955	0.258499	0.592238	0.416414	0.0792863	0.689944	-1.01835	0.928954	1.04829	1.81437	1.41409		-1.00865	-0.87334	-0.967242	0.170385	-0.0982191	-1.87191	-0.309251	0.682743	-0.574235	-0.514986	1.03281	-0.162736	-0.316244	0.462582	-1.32114	-0.449733	0.336129	0.463035	0.0972425	0.0281986
243	0.714796	-0.128614	-0.374147	-0.244988	0.793344	1.28081	-0.566108	-0.535355	1.14758	1.36578	0.486944	0.490986	1.1644	0.979857	1.00803	-0.19423	1.53882	1.30041	-0.229253	0.759858	0.611387	1.70446	0.711236	0.359799	0.417685	1.35801	0.902894	1.61057		0.546668	-0.290709	-0.840119	0.866672	-0.0717209	-0.23716	0.394401	-0.433378	-0.535246	-0.0337734	-0.44707	-0.330384	-0.611298	0.246466	-0.904694	-0.980952	-0.221018	0.337873	0.438646	0.0575671
244	0.515313	0.338498	-2.10434	-0.272051	0.692777	0.198111	-1.32225	-0.263232	0.663993	1.04704	0.779799	0.309333	0.163875	0.821966	0.367137	0.583481	1.05997	2.06606	-0.0315945	0.228271	0.0941811	0.355994	0.843896	-0.4058	1.70008	0.5311	0.136204	1.95473		-0.221696	-0.725088	0.872797	2.11019	-0.955615	-1.50748	-0.85617	0.166718	-0.16368	-0.0901326	1.24011	1.20474	1.05212	-0.2355	-0.746651	0.230196	0.221633	0.488678	0.351596	-0.267009
245	-0.11738	0.510339	0.14872	-0.0454637	-1.22415	-0.221105	0.84427	0.054046	0.823292	0.605249	-0.349942	0.45234	0.30218	0.617992	0.220273	0.720115	0.750891	0.799773	0.36552	-0.505698	0.0239826	0.023098	-0.980295	-0.196358	0.255073	1.34043	0.557302	-0.010259		-0.52963	0.577641	1.1857	1.15688	-0.0995692	1.02331	-0.554906	-0.823218	0.15787	-0.138337	0.312763	0.97178	1.17587	-1.302	-1.50984	-1.29369	-0.534805	1.27835	-0.710718	0.442894
246	0.180519	0.387678	0.850145	1.50294	-0.0504843	1.34516	0.2855	1.00281	0.279891	-0.781054	0.417908	-0.161847	0.699459	0.494261	0.857375	-0.242979	0.0137324	2.29073	0.513841	-0.145021	0.613912	0.229268	-0.0686744	-0.156489	0.325932	-1.70024	1.11783	0.730894		-0.0849597	0.0783168	0.823375	-0.623082	-0.119656	2.80692	0.721323	-0.954398	-0.0609857	0.645838	0.616993	0.527602	0.942471	1.08063	-1.47451	-1.35324	-0.777034	0.500373	-0.0436014	-0.220295
247	0.00785362	-0.945006	0.958844	1.4344	-1.08538	1.13896	0.158234	0.681597	0.545866	0.472784	0.554594	0.569112	-0.16842	1.24431	0.496029	-0.536141	1.73487	0.77873	0.979647	0.210319	1.30773	0.653054	0.0346493	-0.194119	2.22163	1.70298	1.52634	1.24964		1.34419	-0.0069862	0.414143	-0.105273	-1.48423	-0.0205137	0.373039	-1.96433	0.19462	-0.821426	-0.788665	-0.409757	0.382737	1.34322	-1.58342	0.0449673	-0.469334	-0.186943	-2.13594	-0.174325
248	0.0408516	0.477982	1.15625	1.2575	0.521286	0.38305	0.144644	1.05244	0.31681	0.903047	0.542747	-0.180588	-0.156693	1.19683	-0.464212	0.548547	-0.145802	-0.450457	0.414142	1.19003	-0.202496	-0.221793	1.29119	-0.822623	0.713943	-0.503718	1.80574	2.05573		0.0208994	-0.428569	-1.60073	-0.255908	-0.332892	0.0335304	0.569066	-0.6616	-0.455577	-0.352125	0.419907	-0.0194732	0.801495	0.898927	-0.963089	-0.74808	1.19177	-0.391846	-0.00902977	-1.39154
249	0.913403	0.34712	-0.965415	0.643277	-0.226534	1.09453	0.34725	-0.641956	0.932511	1.15775	0.533141	-0.411937	0.827066	0.969132	-0.159861	-0.949068	1.34675	1.31556	-0.887439	0.517797	0.917441	-0.503539	0.803261	0.65983	0.298119	0.743532	1.04322	-0.26783		-0.760643	-0.230368	0.545221	1.01997	-1.79505	-0.577157	-0.098344	0.198572	1.08538	0.396739	0.543226	0.263813	1.10415	0.981266	-0.376561	-0.814746	0.607577	0.426802	-0.57348	0.616975
250	1.26072	0.00551218	-1.18047	1.00416	-0.164907	0.894464	0.197678	0.738279	0.507408	1.3129	-0.262513	1.09426	0.765918	-0.462613	1.17888	-0.116591	1.21715	0.773584	0.98965	-0.200922	0.782686	0.480748	0.597552	-0.683741	0.759299	0.703449	0.872052	0.824722		-0.526698	-1.74028	-1.19514	0.27182	0.776655	1.05194	1.03462	0.0631655	-0.258752	-0.464484	0.919261	-0.0511751	0.836104	-0.416302	-0.550077	-0.785905	-0.0614958	0.428302	-0.390825	-0.0240374
251	0.412969	-0.207536	0.948466	-1.53876	-0.544234	1.34635	-0.0995036	0.667436	-0.113606	0.453311	0.812176	-0.0960445	-0.399024	1.46141	0.990279	0.388446	1.52084	1.00525	-0.583334	0.0430839	0.366848	0.772274	-0.344581	0.224672	0.943604	-0.929597	-0.00442134	0.599811		-0.667924	-0.161911	-0.0421708	-1.26997	-0.301752	-0.942813	1.24777	-2.06573	0.527045	-0.407601	0.35001	-0.646812	0.778156	0.516382	0.470039	-0.656714	0.00225303	-0.210954	-1.94662	0.230544
252	0.373976	0.498735	0.149098	0.190934	1.31863	-0.689054	0.444169	0.632893	0.459404	1.02934	-0.469572	-0.249007	0.239852	-0.0375889	0.710322	-0.0571579	1.0897	-0.216919	1.94169	0.14643	0.690409	0.566038	0.109903	-0.29172	0.65424	1.44101	0.71287	1.37266		0.158999	-0.290556	-1.52141	0.426837	0.837575	-0.689783	-0.128428	-0.41487	-1.43639	0.165232	-0.728335	-0.0142992	1.00987	-0.366301	-0.570216	0.17926	0.2205	-0.591665	-0.948374	0.529061
253	-0.645328	1.76325	-0.200334	-1.61421	-0.20847	0.0980998	-0.539831	1.39915	0.681875	0.505308	0.863947	-0.522952	1.69422	-0.644592	-1.05674	-0.325915	0.351386	-0.26098	0.0940342	0.521852	0.377064	-0.0701914	0.336706	0.215751	1.55747	-0.0636641	0.386242	1.11649		0.643471	0.31391	0.203277	-0.386562	-0.829669	-1.05988	1.65017	-0.368432	-0.675526	0.129828	1.00182	-0.322891	0.941053	-0.964032	-0.908866	-1.38607	0.158855	-0.493177	0.18372	0.218423
254	0.976944	0.982238	0.501158	1.80386	-0.913867	-0.526141	0.65507	0.379868	0.724829	-0.00284312	1.0736	-0.0346116	0.686532	0.396823	-0.644723	0.756704	0.331429	0.737373	0.882977	0.806317	0.410057	-0.40397	0.0506432	-0.0675807	0.54847	-0.23072	0.567652	0.92829		-0.218813	0.601282	0.55405	0.810374	-0.633982	-0.501756	0.591738	-0.14839	0.457462	0.619922	0.82065	0.777735	0.496963	1.1487	-1.66405	-0.312544	-0.592758	-0.125773	0.0387043	1.39777
255	0.531433	1.64362	-0.612925	0.482184	-1.75663	0.0732434	0.474921	0.146114	0.986943	0.361132	0.00230055	-0.192759	0.503037	0.766449	0.0617035	0.0561419	-0.698798	0.602359	-0.509977	0.0637596	0.390023	0.334424	0.169051	0.196884	1.07985	-0.00696238	-1.03092	1.08805		0.0104026	-0.271833	0.335679	1.25558	-1.136	0.317378	-0.533869	-0.447291	1.58525	0.200833	-0.00131689	0.763816	0.562489	0.69237	-0.964016	0.467107	-0.284241	0.356649	-0.332684	-1.12406
256	0.402353	1.63281	-0.127914	0.3548	-0.38347	-0.181859	0.435871	-0.244306	0.774012	0.924052	-0.179749	0.597016	0.286223	1.06406	0.816923	0.559332	0.241587	0.759596	0.127645	0.835686	0.0892757	1.15748	-0.311125	-2.03092	0.262658	1.26303	0.968838	0.671686		-0.42557	-1.00225	0.144402	-0.371857	-1.95539	0.293545	-0.433478	-0.47632	0.0750271	0.0875236	0.947429	1.0516	0.0100623	1.34246	0.561346	-1.23046	0.668902	-0.200913	-0.932104	0.03796
257	-0.58974	0.187472	0.843779	1.68978	0.96528	0.252849	-0.455866	0.0812397	0.326504	0.613384	0.0508274	-0.139523	-0.153223	0.586213	0.960855	-0.383883	0.839113	0.960931	0.573569	-0.44913	-0.414174	-0.137426	0.39688	-0.624972	1.10362	0.469409	1.23586	1.56922		0.147378	-0.106452	0.835792	-0.159054	-0.520803	0.260774	0.744249	0.566905	0.492845	-0.210228	1.1897	-0.310208	1.87494	-0.407234	-1.16583	-0.521706	0.0938708	-0.407918	-0.780017	-0.62454
258	1.29498	0.26344	0.405973	1.45198	0.198828	0.985742	0.0259833	0.740341	0.371576	1.95499	0.349408	-1.80921	0.0673123	1.26884	0.662974	-0.597851	1.1259	0.886289	-0.65218	-0.688828	0.657446	1.5384	-0.23593	-0.562038	0.534469	-0.23397	1.4752	1.04456		0.988949	0.440215	0.707697	-0.201134	-0.0516974	0.134594	0.0493569	-0.440049	0.107481	-0.381556	1.04023	0.576066	-0.210177	0.358547	-0.854671	1.10572	-2.1477	0.426423	0.140009	0.603257
259	-0.36902	0.0304042	0.93025	1.21274	-0.0706371	0.784684	0.681214	0.183447	1.46427	0.581977	-0.270235	-0.444549	0.478833	0.699815	0.85603	-0.288202	-1.06748	0.506157	-0.0862284	1.04457	0.138555	-0.700983	0.507587	-0.118067	1.91557	1.43473	0.762015	1.67619		-0.0773861	0.212325	-0.550659	0.354615	-0.470254	-0.148796	1.5715	-0.821389	0.365239	0.806605	0.608195	0.350946	0.869487	-0.0714853	0.666107	1.03812	-0.636306	-0.127731	1.39127	0.0105071
260	-0.101462	0.772001	-0.797668	-0.440227	0.185979	0.452545	-0.0661092	0.771445	-0.499707	-0.0670876	0.972647	-1.05282	0.33262	0.162911	0.310386	0.26339	0.824093	0.29858	-0.444311	-0.0530369	0.0346146	0.0484287	0.69685	-0.388974	-0.116536	0.901241	0.375246	1.28283		-0.14466	0.838177	0.0879466	0.9473	-0.183782	-0.0680634	-0.152534	-0.482918	0.466557	-0.312051	0.445777	-0.498006	0.0336849	0.277473	-0.261014	0.0178029	-0.36179	0.369849	-0.157268	0.285152
261	0.469224	0.521669	-0.46703	0.107599	0.690578	1.11882	0.616534	1.76816	0.765167	1.57186	-0.083931	0.285598	0.628888	0.604764	-0.422653	0.587163	1.29535	1.15323	0.331978	0.82035	0.16626	-1.02652	0.982824	-0.340739	-0.0690049	0.688427	1.22474	1.40674		-1.07812	0.0717994	-0.694974	1.13969	-0.0943388	-0.504319	0.476167	0.639993	-0.23079	0.369075	-0.183615	-2.2708	0.184283	0.450303	-0.178892	-1.13448	-0.0765024	0.258743	0.275937	-0.13276
262	0.454462	0.692641	1.14568	-1.30546	-0.463652	0.88446	0.882181	0.369299	1.35262	0.868629	0.17192	0.298104	1.35605	0.586125	0.381823	-0.827269	0.913339	0.214976	0.537796	0.458847	0.341137	1.05233	1.15821	0.5819	-0.39968	0.0951883	-0.198793	2.10488		-1.48412	-0.588126	-0.569123	-0.304109	-0.116061	0.963732	0.274354	-0.0506211	0.83972	-1.02946	0.0557071	0.203056	0.0327648	-0.927116	-0.451733	-0.837809	-0.362979	-0.661163	-0.356341	-1.07925
263	0.0541164	1.45922	0.0821878	-0.537438	0.0654864	0.556717	-0.101991	0.818838	0.7876	0.917604	-0.0552711	0.0107823	0.665784	-0.337283	0.485115	-0.685186	-0.111385	0.75287	0.602842	-0.751254	1.19114	0.158009	0.0527965	0.301922	1.13457	0.560285	-0.390537	0.613592		1.05391	-0.174264	1.01923	0.69452	-1.32586	0.22772	0.286085	-0.70593	-0.0246437	-0.71343	1.08167	-1.90531	1.24089	0.23149	-0.338558	0.0357584	-2.22036	0.454676	-2.50963	-0.655978
264	0.0188502	0.84134	0.444492	-0.66041	-1.44003	0.847134	1.02908	0.638651	0.808555	-0.0279208	0.538785	0.24176	-0.090364	0.46861	0.223552	-1.68412	0.763373	0.113117	0.385145	0.148173	-0.249903	-0.280114	0.317127	0.193015	0.331557	0.337035	1.41523	-0.336776		-0.0675961	0.0411802	0.60587	0.131025	0.395675	0.997975	-0.985286	-0.0814578	-0.273987	0.200485	0.00131911	0.0961363	1.38165	-0.131049	-0.658299	0.969419	-0.435704	-0.70613	0.302657	-0.255067
265	-0.455986	-0.633011	0.930142	-0.657532	-0.439471	0.00571133	0.349681	0.39906	0.26913	1.51459	-0.289252	1.18331	0.879944	0.786924	-0.0201509	0.0191528	2.33199	1.20198	0.838248	0.771748	-0.891867	-0.215646	0.397737	0.0635419	1.13357	-0.124087	1.12543	1.89301		0.18775	-0.313929	0.675491	1.21712	0.392687	-1.06329	0.245518	-0.793771	-0.779986	0.490674	-0.210193	0.452196	0.377139	0.1325	-0.115829	0.177947	0.180667	-0.272465	0.482375	0.0854555
266	-0.434408	-0.04671	-0.596281	1.45212	0.187317	0.326293	-0.254796	-1.23958	0.660083	0.292346	0.271064	0.0923299	-0.162	-1.17753	0.45942	0.280254	0.876602	1.59072	0.443354	1.14513	0.758525	1.76615	0.289585	0.0906217	-0.42719	0.91988	0.559468	0.493804		0.181519	0.0655567	0.58068	-0.857764	-0.223305	-1.04434	0.73018	0.21177	0.242113	0.976109	-0.904156	-0.388675	1.08868	-0.0633225	-2.47157	0.00296098	-1.0327	-0.219311	0.158574	0.341775
267	-1.22992	1.10096	0.497534	-1.62295	0.0595607	-0.439208	0.0334608	0.945675	0.234551	0.281999	-0.00720371	-0.185165	0.711219	0.0489765	0.614034	-0.211455	0.422768	0.501228	0.693452	1.26263	0.534919	0.297686	-0.599468	0.238212	0.370451	0.597239	0.304382	0.903131		0.24236	-0.274844	1.38187	0.708803	-2.23455	-0.457089	0.0214707	-0.375535	-0.390929	-0.493373	-0.442334	0.149534	0.588274	-0.0803569	-1.62661	-1.30458	-0.557048	-0.0888494	-0.864163	-0.459031
268	1.18403	0.416865	0.15311	2.09503	-0.525857	1.04198	-0.126171	0.642879	1.51992	0.877074	0.240058	0.88474	0.58102	0.553971	0.692983	-1.84094	2.25471	0.941024	0.938559	1.49124	-0.683934	-0.435719	0.246864	-0.967623	0.53952	1.29176	1.28773	1.83604		-0.0311398	-0.279148	0.78699	0.551079	-0.600843	0.560508	-0.544567	-0.334375	1.60772	0.152241	0.163545	-1.55095	0.336156	0.325379	-0.67673	-0.606263	0.924956	-0.646036	-1.17796	-1.08379
269	0.453798	0.627742	-0.0635839	0.759942	-0.941674	-0.221912	-0.24031	1.54898	0.386677	-1.23496	0.306495	0.0021497	0.603528	0.292534	0.332869	-0.666111	0.266164	0.479931	1.20543	1.05896	-0.20566	-0.0361832	-0.0661836	-0.230874	0.286928	0.650036	0.443173	0.47326		-1.24689	0.313329	0.299141	0.104146	1.92393	1.24057	-0.102411	-0.354696	0.977949	0.232746	-0.53579	-0.0895094	0.312277	0.517898	-1.11216	-1.0124	0.233808	-0.596099	-0.630328	0.300295
270	1.2757	-0.437333	-0.325238	0.14423	0.136527	-0.107595	0.554648	1.03193	1.11967	0.793617	1.46023	0.977253	0.284552	0.810499	0.994139	-2.20388	0.997078	1.67562	0.260563	0.27183	-0.358141	0.670589	0.347092	0.106826	1.51346	0.889366	1.1075	0.844843		-0.428601	-0.0785677	0.675654	-1.81411	0.614566	0.195303	0.927332	-0.34718	0.436977	-0.378187	0.275543	0.221754	0.792944	-0.337947	-0.86734	-0.178489	0.0604639	0.611702	-0.0759898	-0.460379
271	0.240482	0.448981	-1.8646	-0.089216	0.190883	1.31517	0.700827	0.90787	1.1163	0.154305	-0.23016	-0.143148	-0.263863	1.12688	0.296118	-0.547223	0.958979	0.836442	0.272812	0.925434	1.04932	0.588453	-0.0214438	0.0180659	0.361323	0.768537	0.881235	1.50549		0.498804	-1.87175	-0.574961	2.86084	-0.503171	0.506494	-0.374627	-1.69283	0.32801	0.710955	-0.543433	0.857853	0.786691	0.203278	-2.2248	-0.055342	-0.71658	1.08164	-0.628103	0.215616
272	0.0349927	-0.414502	0.723304	0.697904	-0.105551	1.30979	1.04544	0.626439	-0.274196	0.150571	0.260469	-0.332678	0.472906	0.419798	0.0558961	-0.481599	0.451521	2.20774	-0.102415	1.25838	0.124081	0.560572	0.18154	0.426402	0.782111	-1.61058	1.46801	0.915444		-0.767168	-1.763	-0.862682	-0.0755495	0.496602	0.261375	0.368949	0.851868	1.22522	0.335871	0.0552775	-0.229323	-0.470059	0.437904	-1.22765	-0.919538	-0.723367	1.03854	1.46268	0.199524
273	0.302028	1.1941	0.927886	-0.943688	-1.05613	0.550207	0.579205	-0.0857396	-0.0489845	-0.36029	0.292471	0.308581	0.91034	1.25557	0.435787	0.00112874	-0.0192539	0.565568	1.37002	0.111187	-0.850488	0.432803	0.164617	-0.0275279	0.183283	0.408708	0.185686	0.473491		0.650527	-0.354098	0.667354	-1.04013	-0.329769	-1.18598	0.387845	-0.11416	0.951404	0.269096	-0.102149	-0.663591	-1.67286	-0.0597004	-1.44429	-0.327158	-0.276761	-0.170835	-0.536261	0.268193
274	0.52167	0.589827	-1.65928	0.29345	-1.23949	0.765163	0.890873	0.427989	-0.0676198	1.65274	-0.0563857	-0.0708186	0.16875	0.695639	0.499384	-0.0875675	0.497867	1.40311	1.39339	0.25952	0.417084	-0.481411	-1.42626	0.254271	0.61573	0.0701784	-0.714085	0.697143		0.207231	0.193987	-0.845909	0.973451	-0.476666	-0.884156	0.237184	-1.27567	0.598849	0.42705	-0.443591	-0.308054	-0.662583	0.348139	-0.382355	-1.63112	-0.364183	0.388626	0.0100884	0.138863
275	-0.508245	1.58897	-0.262093	-0.138359	0.0902714	0.98119	-0.0525813	0.122956	0.351803	1.2709	-0.160971	0.168729	1.2843	-0.316487	-0.244591	-0.642615	1.08063	0.244448	0.844247	0.588552	0.284019	0.201651	0.790285	-0.523735	-0.0755975	1.03893	0.865252	0.777776		-0.400622	0.264771	-0.431474	0.628128	-0.667424	-0.126041	-0.357651	-0.368988	1.42417	-0.544852	0.702155	-0.576785	0.0134669	-0.213619	-0.0912387	0.605788	1.81043	-0.305994	-1.01056	-0.126211
276	0.952742	1.30214	0.555511	0.132121	-0.470112	1.04766	-0.0726961	0.272616	0.164749	0.269428	0.872676	0.393242	-0.360835	-0.795006	0.65836	-0.0496635	0.492117	0.502197	0.659215	0.643335	0.195794	0.426944	0.353955	0.364415	1.28704	1.04339	0.79053	0.105912		-0.284924	-0.152478	0.131954	-0.556848	0.336682	-0.350466	1.28875	0.0934144	-0.997048	-0.0693832	-0.0732329	-0.114639	0.167222	1.11898	-0.482637	-0.229354	1.37636	0.0336252	0.464154	-0.142186
277	0.110893	1.15551	1.23198	0.296718	-0.244597	0.132614	-0.186655	1.09495	0.239201	0.852272	0.0814146	0.589175	0.912835	0.878977	0.00488305	-0.297018	1.10023	0.911108	0.601875	0.0744421	0.449461	-0.0729973	0.791148	0.828539	0.458767	0.1347	0.0818513	1.29472		-0.380068	0.39106	0.422777	-0.264021	-1.19323	-0.166294	-0.0738384	0.483736	-0.320033	0.565576	-0.100554	0.196355	0.582044	0.247522	-0.85507	-1.09012	0.202608	-0.280521	-0.499641	-0.153808
278	1.37441	-0.435271	0.74752	0.265784	0.792456	0.69589	0.0495525	1.12119	-0.413428	1.61966	-0.424963	-0.365194	0.356848	0.707645	-0.247789	-0.627752	-0.352183	-0.146953	-0.4486	0.11468	0.326268	-0.518709	0.0619827	0.296037	-0.215301	0.515615	-0.270113	0.798204		-0.477504	0.182606	-1.39824	0.771093	0.393351	-0.858432	0.649269	0.631934	-0.924882	-0.892307	0.886875	0.337261	0.717697	0.690193	0.50673	-0.0617592	-1.12491	0.731004	-0.84309	-0.216129
279	0.207345	-0.112495	-0.322642	-1.10439	0.770567	-0.325481	0.535578	-0.736419	-0.161579	0.348673	0.920081	-0.404651	1.49851	0.281979	-0.1178	-0.747929	-0.103271	0.0664189	-0.22234	0.264603	-0.289341	-0.440424	0.516432	-0.447878	0.737153	1.35165	0.980595	0.597217		-1.12995	-0.694111	1.18638	-0.572662	0.0477204	-0.067188	0.20922	-0.074273	-0.489817	-0.555989	-0.349361	0.0831022	0.461211	-0.443425	-0.48353	-0.886284	0.366533	0.620531	-0.534626	-0.251856
280	0.401216	0.0582873	0.251458	0.168346	-0.094165	0.402921	0.0695994	NaN	0.567727	0.886872	-0.614345	0.259352	0.621795	1.66993	0.681654	-0.363559	0.0923053	-0.883213	1.49788	0.503873	-0.108043	-0.0624891	0.654936	0.480834	0.170545	-1.85734	0.649441	1.68991		-0.988228	0.213917	-0.172082	0.484603	-1.19823	-0.929234	-2.00665	-0.00516466	-1.73681	0.435818	0.943142	-0.947682	0.564762	0.349595	-0.747541	0.470701	-0.565589	-0.107427	0.572872	-0.504548
281	1.32718	0.17021	0.603655	-0.79362	0.768101	-0.139382	-0.0487318	-1.44946	0.357276	0.31848	-0.386395	0.485613	0.878521	-0.398903	0.81417	-0.961833	0.195926	1.6021	1.10977	0.493479	1.06447	-0.248942	-0.0343285	0.0377438	-0.221444	0.241116	1.95006	1.14199		-1.06458	0.396466	0.160053	-0.0204314	-0.847305	-0.763955	0.346593	0.583292	0.13859	-0.644483	-0.846705	0.57061	-0.126372	-0.286452	-0.968117	-0.310544	-0.381596	0.636957	0.868298	1.71402
282	1.64513	-0.294656	0.217761	-0.471967	2.1955	-1.00241	0.97585	0.582146	0.500652	-0.297	0.131755	0.0891883	0.695449	0.0576589	0.0307297	-0.149477	0.0446381	0.324574	0.870681	-0.312787	-0.0211954	-0.47721	0.0176219	-0.692638	0.668794	-1.24116	0.725155	0.373414		-0.151823	0.21817	-0.685074	-0.197917	-0.545796	0.0627409	-0.704214	-0.255169	-0.209148	-0.268674	-0.209967	-0.182814	-0.0521169	0.16698	0.434568	1.1457	1.16206	-0.167081	-0.259378	-0.0715324
283	-0.572279	0.652996	-0.124184	0.639676	-0.123276	0.196827	0.365222	-1.87647	0.4619	0.362028	-1.14774	-0.0522687	0.749085	0.91958	0.208858	-0.583621	0.17152	1.16342	1.10143	0.433421	1.17885	0.0204245	-0.163263	-0.309507	0.589037	-0.927564	-0.0727897	1.50324		-1.1609	0.176127	-1.15117	0.389848	-0.730822	0.37069	-0.137142	0.383445	0.458733	-0.278033	-1.06162	-0.725742	0.0166334	-0.591625	-0.330784	-0.468808	-1.06543	-0.867211	0.478089	-0.695892
284	-0.186637	0.108187	0.796405	-0.162492	0.997979	0.358092	-0.0894214	0.712195	0.398565	0.508136	0.191796	-0.0450417	0.841415	-0.0931531	0.793218	-0.0983081	0.843747	-0.784405	0.169268	-0.0753286	-0.717268	0.394813	0.382207	-0.0861514	-0.0877497	0.517944	0.753635	-0.529066		-0.485025	-0.815029	0.962689	-0.0778587	0.582417	0.154813	0.260579	0.621632	0.42875	0.789167	0.398259	0.399544	-0.010175	0.600883	0.103771	0.164036	-0.0910924	-0.887439	-0.487111	-0.748554
285	0.246568	0.834311	0.227287	-0.352677	-1.18938	0.797675	-0.0380901	0.684511	-0.447746	0.16951	-1.23694	0.096536	NaN	0.230067	0.015732	-0.0781952	0.0764782	1.22552	0.819549	-0.62977	0.0592597	0.700372	-0.457226	0.213814	0.697774	0.876226	0.687601	0.528148		-1.06867	-0.340114	0.459919	-0.214824	-0.660221	-0.786184	0.690939	-0.116881	0.418483	-0.633037	-0.656697	0.580139	0.525401	-0.161579	-0.309143	0.0785709	0.661748	-0.115275	-0.531847	-0.0242376
286	1.50863	-0.0508596	0.19562	0.452428	1.27344	0.0903142	0.109645	0.0797428	0.532158	-0.924608	0.625405	0.224881	0.312361	0.926898	1.51095	-0.953766	0.451495	0.995509	1.63171	0.250849	0.287253	0.045879	-0.40539	-0.820804	0.812584	0.793575	0.936515	2.30665		-0.261853	-0.357068	-0.536249	1.09967	-0.920538	-1.01077	0.240783	0.341749	-0.278168	-0.193816	-0.236784	0.757665	-0.508632	-0.371072	-0.578364	-1.27009	-0.669572	0.179894	0.974354	-0.717962
287	0.882712	1.04818	0.345724	0.163989	-0.308377	-0.289936	1.08435	-0.000379489	1.06581	0.0137119	-0.237659	0.462491	0.401912	0.446809	0.429303	0.186199	1.48027	0.909446	0.921443	0.645747	-0.178077	0.186846	-0.222506	0.755445	0.908223	0.342854	0.954405	0.934408		0.0988378	-0.17353	0.19118	0.751488	-0.41905	-0.63046	0.82204	1.47004	1.04705	0.931198	0.81371	0.446273	0.413075	0.0717181	0.0578105	-0.375453	-0.394934	1.36595	-0.591966	-0.587981
288	0.15329	0.926714	0.269283	-0.505513	0.700273	0.0279825	-0.6059	1.16114	0.80685	0.624136	1.20916	-0.670944	0.00958752	0.0638095	0.476291	-0.908505	-0.538312	0.891169	0.226084	-0.118452	0.426627	1.18418	-0.259235	-0.280359	0.189763	-0.221803	1.62441	1.05853		0.100676	-0.255928	-1.45979	-0.118995	0.0456577	1.53426	-0.798702	-0.952709	0.747562	-0.359527	-0.0598472	-1.24211	0.440948	-0.992818	-0.23245	-0.564791	0.0768801	0.305194	-1.08047	0.618657
289	0.146115	0.505889	-0.453993	-1.3853	0.605038	-0.245875	0.167958	0.0714058	0.201353	0.698971	0.33767	0.406674	0.827177	0.612874	0.146302	-0.834045	0.448706	0.392156	0.818551	-0.538849	-0.0746617	0.323045	0.0454503	-0.476955	0.113774	1.02351	-0.89761	-1.15271		-0.0899497	-0.0473102	-0.109778	-0.296916	0.370837	1.40022	-1.30374	0.43631	1.25088	-0.181405	0.446925	-0.283546	1.44925	0.65174	-1.76092	0.805303	-1.0817	0.291529	0.163031	-0.315242
290	-0.873273	1.24062	-0.000128275	-1.25369	0.65064	0.709455	0.316724	0.573615	0.482867	0.922005	-0.458108	0.866843	-0.562086	0.259264	0.78823	-0.486497	-0.162952	0.272369	-0.0910539	-0.297411	0.0607192	0.794666	-0.494827	0.110268	-0.292135	0.865532	-0.718855	1.36629		-0.837508	-1.24911	-0.239959	0.735295	-0.657336	-0.0630911	0.25393	0.142183	-0.709558	0.0403454	-0.441012	0.279217	0.194172	0.056076	0.0867058	-0.361827	-1.21858	0.58002	-0.846468	0.0801536
291	0.413731	0.852834	0.157548	2.07834	1.1852	0.291542	1.1362	0.939315	0.727962	0.989466	0.179187	-0.248065	0.0443493	0.549765	0.772021	0.677296	0.129421	0.787917	-0.271435	0.0753883	0.614556	0.244489	0.535232	-0.25279	0.295792	0.806912	0.202864	0.607775		0.510653	-1.17941	-0.423297	0.022456	-0.0263388	0.369184	1.54271	0.0523463	-0.091446	-0.242964	0.675515	-0.27823	0.423212	1.29406	-0.0596355	-0.928454	0.661033	-0.316077	0.157453	-0.177194
292	0.0620444	2.24361	0.17591	-0.436473	0.274529	0.905824	-0.0230773	-0.493108	0.235039	0.764343	-1.59116	1.06834	0.868933	0.382699	-0.156132	-0.503925	0.773307	1.95238	0.681688	-0.108163	-0.301562	-0.611996	-0.505786	-0.105272	0.240119	0.767833	1.36607	-0.49939		0.402366	-0.676617	-1.28262	-0.782595	-1.78652	-1.20971	-0.32953	-1.28442	0.815499	0.559525	0.871643	0.104761	0.0716571	0.776263	-0.225971	-0.250958	-0.773309	0.19339	-0.695101	-1.2328
293	-1.56038	-0.0542181	1.07054	-0.752041	0.251212	-0.418432	0.287246	0.175333	-0.121195	0.848714	0.298232	0.24613	-1.04279	0.486766	0.26434	-0.140422	0.687314	1.41959	-0.0944454	0.461066	0.582966	0.0684928	-0.104459	-0.118985	0.102969	0.724611	0.497137	0.0666143		-0.370619	-0.323992	-0.508052	0.371219	-0.59182	-1.64691	-0.78278	0.796146	0.179266	-0.169168	-0.00897668	0.462703	0.762255	1.61438	0.38143	0.695015	-0.297195	0.0471874	0.135523	0.185478
294	0.740192	0.241765	-0.191511	0.0389171	0.649166	1.61312	1.34427	0.471643	1.10028	-1.57764	-0.380164	-0.20147	0.33653	0.17442	0.714346	-0.279925	0.580566	0.786106	0.938175	-0.174383	0.444426	-0.266591	0.0352394	0.245167	0.492124	0.427239	0.703439	1.20515		-0.433065	-1.43863	0.423671	-1.27191	0.387252	0.668227	0.30881	-0.08011	1.61972	-0.708961	1.69633	0.138271	-0.377656	1.19618	-0.167061	-1.21623	0.344187	0.711434	0.594457	0.296979
295	-1.08408	0.716984	-0.248941	-0.822485	-0.199651	0.453729	0.815274	-0.358151	0.084331	0.551787	0.783028	-0.376478	0.260749	0.265509	0.979221	-0.432655	0.614267	0.679637	0.686981	0.28815	-0.548057	-0.100857	-0.692146	-0.222949	0.189142	0.0158324	-0.111903	1.42428		-0.641652	-0.456176	0.708665	0.66946	-0.672815	-0.222519	-0.197312	0.234079	0.00415152	-0.345722	-0.713793	-0.734654	0.0107251	0.130733	-1.50479	1.11327	-0.398149	0.332079	1.21886	0.815852
296	0.127857	1.6438	0.643509	1.1318	-1.12853	0.578466	0.816792	0.115496	0.674282	1.43566	-0.100411	-0.215301	0.145954	-0.174187	0.581977	-0.2284	0.483108	0.237899	1.37784	0.30872	0.780164	0.220195	0.323511	0.817531	0.0886717	-1.47486	1.05476	1.257		-1.03681	-1.44134	-0.0947786	-0.122045	0.37667	0.471117	0.0896226	-0.650139	-0.134706	0.296062	0.850021	-0.107048	0.94845	0.253141	-2.07757	-1.17768	1.03001	-0.357298	0.799288	0.161253
297	-0.0058551	1.03578	-0.450071	-0.468197	-1.46528	-0.838907	1.02364	0.147254	1.43979	0.9343	-0.38288	-0.420034	1.0798	0.275977	0.122608	0.215888	-0.144735	0.088319	1.33189	0.620445	-0.602826	-0.427179	-0.410639	-0.296092	0.510297	1.81593	-0.263059	1.18213		0.418115	0.237006	0.203604	0.237268	-0.190594	0.173193	-2.2545	-0.303526	0.0705326	-0.628894	-1.02744	0.454448	0.0587326	0.139044	-1.00611	-0.697076	1.18638	0.0626683	0.829128	0.575241
298	0.0773689	0.798958	0.812288	0.343452	0.25095	0.114038	0.441795	-0.195859	0.758756	0.840043	-0.293576	-0.00579435	0.943158	0.115915	-1.22881	-0.388701	0.335321	1.15498	0.425476	-0.416266	0.478668	1.3056	1.41786	-0.284328	0.612458	-0.330211	1.22069	0.527299		-0.538869	0.657347	0.454464	-0.0362042	-0.617679	0.872492	-0.366436	0.0856254	-0.243318	0.207607	0.370727	-0.74833	-0.186805	-0.477788	-0.490199	-0.129056	-0.868985	-0.448202	0.791269	-0.051766
299	0.00786665	-0.257711	-0.426919	-0.160101	0.854988	0.201756	-0.293048	-0.146367	-0.897085	0.703143	0.701272	0.976913	-0.110792	0.0577241	0.376101	-0.212233	-0.760776	0.682954	0.970325	-0.340998	-0.615912	0.227798	0.274352	-1.30737	-0.596412	0.0513903	0.569541	NaN		-0.443971	-1.73716	0.171537	-0.100217	-2.36668	-0.213364	0.487268	0.875385	-0.583821	0.209484	0.330416	-0.679713	0.290105	-1.26158	-0.252148	-0.922454	0.847525	0.89505	0.702508	-0.629287
300	0.770083	1.40284	-0.866767	0.596845	0.351177	-0.436277	-0.552138	1.08015	0.717465	0.0418772	-0.313132	0.209327	-0.677624	0.152528	-0.67804	-0.209853	-0.136927	-0.562952	0.20277	0.49451	0.0850026	0.0917916	-0.4032	-0.955215	-0.543427	2.29037	0.387488	1.8101		-0.451301	0.214334	-0.0623512	-0.110169	1.01833	0.111038	-1.04546	-0.957503	0.888518	-0.728661	0.720133	-1.4656	-0.848859	0.339647	-1.8434	0.164509	0.0441471	-0.550322	-0.203043	0.454736
301	0.452257	2.10921	0.0390952	1.01592	1.43588	-0.17823	1.0337	-0.0135641	0.451421	0.685106	-0.213892	-0.443239	0.705513	-0.292778	1.31408	-0.365426	1.11141	0.697162	0.438672	0.371053	0.927784	0.441276	0.917167	-0.703503	0.903421	1.0467	0.686975	1.27837		-1.31169	-0.453225	-0.713914	0.344973	-1.26623	0.127626	0.60805	0.13995	-1.16509	-0.89519	0.615282	-0.976883	0.422124	0.726271	-0.0969515	0.303594	-0.288033	0.43133	-0.925413	-0.666452
302	0.136638	0.976295	0.531924	1.29493	-0.169999	-0.305751	0.452091	0.387603	0.0389425	0.109322	-0.318944	-0.15505	0.509878	0.61341	0.412207	-0.176088	-1.20697	1.23546	1.93926	-0.12318	0.266447	-0.327655	-0.486371	-0.373759	-0.413709	-0.313572	-0.523681	0.21367		-0.0569536	-0.124907	0.854227	0.491326	0.89581	-0.0527798	-0.209702	-0.0794385	0.150975	-0.719581	0.269276	-0.516998	1.04542	0.64947	-0.542046	0.114306	-0.844683	0.307725	-0.516089	0.146377
303	0.797129	-0.628129	0.0879612	-0.920305	0.835846	-0.673837	1.42474	0.823909	0.999059	0.145653	0.834358	-0.150918	-0.722631	0.512272	0.530773	0.188546	-0.216748	0.598046	1.38048	-0.124306	-0.608479	0.668012	0.136515	-0.528713	0.269531	1.15862	0.415003	-1.09771		0.199395	-0.598767	-0.23217	1.15194	0.261856	-0.443416	0.139483	-0.442329	0.698489	-0.392307	-0.501143	-0.607474	0.805653	0.568984	0.192871	-0.0657849	1.56041	0.636922	0.178513	-0.0082203
304	0.238871	0.783933	0.144664	2.0554	0.508714	0.16349	-0.805953	0.802179	0.0526099	-0.323868	0.65906	-0.97844	-0.0240447	-0.69381	-0.13301	0.115944	-0.93992	0.780605	-0.290948	-0.4059	0.641963	-0.227346	-0.379366	-0.433367	0.352166	0.617154	-1.2286	0.0599204		-0.503173	0.0602947	-0.67977	-1.0369	0.915077	0.404035	0.258159	-0.324694	-0.507916	-0.258951	-0.202677	-0.598965	-0.433952	-1.2498	-0.175133	-0.386947	0.870435	-0.210704	1.06046	-0.00693571
305	-0.428582	-0.246114	0.0970396	0.186229	-0.145071	0.660794	0.428136	0.182494	0.273425	0.590554	-0.25737	0.121861	-1.06727	0.263094	0.471216	-0.969791	-1.38406	0.515837	0.318424	-0.110317	0.517897	0.832953	1.13252	-0.118265	0.0140299	1.04496	0.776903	0.461017		1.66482	-0.61399	-1.07669	-0.832256	-0.606573	-0.117659	-0.439496	-0.01869	1.41532	-0.309749	0.499002	-0.769096	1.60897	0.799691	0.00185469	0.245359	1.94846	0.251584	0.470274	0.519102
306	-0.583439	0.585347	-0.340178	-0.957055	0.450605	0.990678	0.762466	0.153739	-0.340164	0.632159	0.500143	-0.285398	0.149723	1.06348	-0.23268	-0.427641	-0.649181	0.949274	0.547092	0.439381	0.635523	-0.183998	0.23133	-0.181058	0.146894	0.78548	0.148555	-0.278196		-0.479389	0.0337355	-0.196904	-0.127607	1.16916	0.650218	-0.520048	0.234641	-0.657138	-0.623126	0.0457294	0.775944	0.800171	0.908746	-0.355817	-0.557819	-0.170287	-0.606773	0.16792	-0.873493
307	-0.382668	0.265558	-0.113788	0.562144	1.19893	-0.267543	0.113506	-0.506574	-0.2419	0.573338	-0.546076	0.111024	-0.242514	0.0589088	1.02887	-0.677696	1.23717	0.545499	0.21398	0.47835	0.348463	0.503764	-0.307041	0.267815	0.656411	-0.809744	-1.57125	1.10203		0.912221	-0.67109	-0.573736	1.08745	-0.855104	-0.365677	-0.176357	0.918359	-0.0622333	-0.335566	0.220878	-0.651989	0.836599	-1.63176	-0.57707	-1.01449	0.308899	-0.471658	1.63079	-0.286293
308	-0.155422	1.29439	0.642748	0.628576	0.653285	0.0545056	0.560586	-1.51233	0.438413	-1.17592	0.834253	0.484442	0.213996	0.588442	-1.58063	0.0895271	-0.453444	1.38553	0.236596	-1.21328	0.754685	0.0395776	0.312731	0.107647	0.674683	0.877606	0.912837	0.194591		-0.0219053	0.347815	-0.294244	-0.344187	-0.393663	-1.37624	-0.419174	-0.310253	-1.01597	0.00986356	0.41238	0.476096	-0.149685	1.1775	-1.26193	-0.38574	0.233971	0.513849	0.381139	-0.0808192
309	-0.23177	0.96353	-0.00638217	1.51256	-0.753139	0.000192038	0.392529	-0.109805	0.569968	0.952999	-0.278255	-0.281877	-0.276707	-0.671618	0.170091	-0.135286	1.42892	1.55565	0.178379	-0.208178	-0.594164	-0.301877	-1.146	-0.410018	1.09933	0.757168	-0.052689	0.643969		0.192564	-1.24404	-0.471629	-0.595591	-0.441726	1.74795	0.792296	-0.988014	-1.28014	-0.842684	-0.11349	-1.43147	-0.701564	0.939738	-0.455584	-1.03092	0.304251	0.231212	1.33692	0.681046
310	-0.500904	-0.555285	0.21529	-0.0101265	-0.525202	-0.491428	0.754301	-0.347789	-0.853917	0.330669	-0.72009	0.237164	0.397418	0.219225	0.786415	-0.625709	0.33008	0.10714	1.0497	-0.240682	0.496486	0.369223	-0.379635	-1.10476	0.243522	0.278999	0.309132	0.991943		-0.419227	-0.757055	0.150463	0.664965	-1.88906	-1.44436	0.675107	0.0159836	0.734306	0.455035	0.454413	-0.158878	0.83985	-0.340118	-1.89476	-0.581186	0.126477	0.831114	-0.317899	0.580096
311	-0.206013	-0.378548	0.68087	-0.119918	0.232343	-0.666201	0.885077	0.0840289	0.313087	0.705069	-1.16099	-0.46832	-0.339344	0.866289	-0.102796	-0.908561	0.216296	-0.836214	0.0917437	-0.788003	-0.239644	0.212539	1.00063	-0.587917	0.462909	0.23241	0.128552	1.00398		1.09332	-0.122184	-0.968655	1.35438	-0.14658	-0.311013	0.43396	2.29323	-0.75698	0.0737839	0.154062	0.976995	0.0624957	0.802859	-0.535258	-0.0896001	0.71289	0.104645	0.250465	0.378651
312	-0.62236	0.77495	0.35059	1.25183	-0.0160946	0.0374668	0.849695	0.325565	0.561757	0.202857	0.83838	1.19305	-0.73068	0.740917	1.17764	-0.212724	0.116604	1.10193	0.449486	0.39733	-0.00960677	-0.0345234	-0.552708	-0.325205	1.22586	1.06662	-0.388707	-0.164788		-0.356771	-0.507963	-0.844774	-0.03356	-0.715417	0.482427	-0.0531045	0.0264905	0.0109867	0.397908	0.200823	-0.226086	0.380676	1.03592	-0.70448	0.291692	-0.242087	-0.387831	0.176773	-1.05281
313	-0.0811232	1.01049	-0.654442	0.34234	1.14743	-0.578738	-0.969951	0.183421	0.395897	1.85032	-1.31872	-0.53391	0.368857	-0.0278814	-0.292725	-0.602511	-0.463446	0.224719	-0.0676887	-0.27276	0.602038	0.568798	0.479921	0.739586	0.549556	0.218726	0.77072	0.671618		-1.08911	0.169762	-0.315984	-0.706925	-0.0155509	-0.295204	-0.789459	-0.226386	-1.11081	-0.451105	0.410903	0.618787	0.202148	0.167832	0.803434	0.973491	0.205459	-0.040893	-0.142603	-0.30998
314	0.0972735	1.13408	0.335049	-0.0856499	1.51061	-0.804359	-0.362194	0.74487	0.49558	0.38688	0.34599	-0.612107	0.0715353	-0.0486483	0.900845	-0.106522	-0.56278	-0.712487	0.0938291	0.227734	-0.582435	-0.0843795	0.264796	-0.00662851	1.12457	0.0407852	-0.161286	1.03418		-0.222149	0.784111	0.468914	0.429071	-0.109285	0.268907	-1.04708	-0.565636	-0.646922	-1.40528	0.0147856	-0.840255	0.846327	-0.014846	-0.819972	-0.495408	0.732146	-0.387665	0.721399	0.508467
315	0.745318	-0.304038	-0.189493	0.078179	0.048936	-1.2267	0.151205	-0.34366	-0.366463	0.685619	-0.366277	-0.768818	0.557647	-1.42769	0.698401	-0.152832	1.45053	-0.0969661	1.02001	0.0755379	1.45069	0.423747	-0.329248	-0.578619	-0.0726088	-0.216737	-0.461723	-0.0302825		-0.677471	-0.492788	0.0783237	-0.982525	-1.3437	0.0456585	1.69772	-0.643826	0.139207	-1.31423	-0.353838	0.565214	0.120625	0.683702	0.721487	-0.571004	0.257017	0.236499	1.55192	0.284256
316	0.575323	-0.600905	-0.972286	0.0923038	-0.875385	0.908583	-0.692667	0.902314	0.105791	-0.319975	0.494237	0.353774	-0.872397	0.502385	-0.0445623	1.0412	0.359438	1.31391	-0.0538072	-0.489034	-0.982498	0.236691	-0.354089	0.445684	1.48332	-0.42892	-0.0729258	-0.368235		-1.35016	0.263002	-0.0418021	-0.696993	0.2388	-0.264705	-0.416618	0.508354	0.0827461	-0.896707	0.667738	-0.3226	0.779651	-0.460832	-1.48352	0.976581	0.335876	0.431391	1.07051	0.585296
317	-0.101897	-0.508743	-0.0408667	-0.223881	1.43992	0.235355	0.409835	-0.118927	0.683356	0.407713	0.789432	0.593952	0.165652	0.12261	-0.792093	-1.30551	0.397215	-0.122635	-0.68087	0.0562042	0.244984	-0.141288	0.428839	0.836464	-1.50829	0.0207689	-0.523451	0.713112		-0.888058	-0.597277	-0.18642	-0.920735	-0.920336	0.210628	0.135365	0.247547	-0.437833	-0.902073	0.62473	-0.42118	0.299688	-0.117141	1.13348	-0.330053	-0.561334	0.489377	0.47499	-0.505303
318	-0.479147	-0.33168	-0.806016	-0.843976	0.585867	0.575053	0.458804	0.290178	-0.411115	0.025212	-0.596554	0.141712	-0.170603	0.197048	1.01796	-0.308042	-0.0482314	-0.50846	0.852467	-0.019485	0.0929101	-0.474844	0.0774214	-0.579248	-0.473397	-0.797402	-0.576545	0.563408		0.418514	0.0682251	-0.0786312	-0.449451	-0.271613	-0.425936	0.961177	0.449021	1.35813	0.684645	0.33915	0.119689	-0.38863	0.21506	1.10772	-0.654697	-0.619106	-0.804162	-0.910904	0.00577605
319	-0.323485	-0.0917107	-1.32101	-1.3293	-0.579743	0.189585	0.47195	-0.247531	-0.232692	-0.651952	-1.41681	-0.48486	0.352761	0.0246607	0.661845	0.0845836	0.184844	-0.826755	-0.492102	0.334676	0.740704	0.210181	0.381086	-0.0308815	-0.196206	0.439635	-0.786918	-0.758783		0.360347	0.171243	-0.906372	1.39094	0.152447	-0.805488	-0.0260829	-0.233937	0.0389899	0.557655	0.376856	-0.357489	-0.154316	-0.193297	-0.0123382	0.114449	0.0998877	-0.245385	0.748191	0.269996
320	-0.254498	1.01967	0.453655	-0.769809	-0.11571	-0.601291	-1.27231	-0.475442	-0.156723	1.12117	0.311313	-0.662366	0.0228513	0.0389377	0.418642	0.268817	-0.874803	1.20182	0.410812	0.295823	0.254311	0.554163	0.927185	-0.0946439	0.473814	0.219682	0.695364	0.689976		0.390955	-0.304751	0.240668	-0.289263	-0.650291	0.0629471	-1.25715	-0.838572	0.361833	-0.323242	0.253497	-0.340861	-0.654675	-0.852571	-1.0405	-0.533814	-0.53731	-0.551162	0.163982	0.312573
321	0.659403	0.353002	0.584497	0.492531	0.190359	0.556257	0.471108	-0.0413176	0.152477	-1.13573	1.0746	0.431063	0.735809	0.186306	0.0602126	-0.202113	-0.24294	-0.224404	-0.881573	-0.507125	-0.00450331	-0.420703	-0.652376	0.127525	-0.334611	-0.222108	-0.387569	-1.28732		0.751934	-1.18253	-0.129181	1.02892	1.18416	0.193356	0.943589	0.0665977	-1.97902	-0.151078	0.816346	-0.0179735	-0.130196	-1.09454	-0.245437	0.865099	0.880712	-0.7595	-0.27565	-0.552056
322	-0.0920391	0.550589	-0.179122	0.889627	-0.862702	0.517252	-0.419539	-0.055386	0.129746	0.220028	-0.110026	0.521413	0.321409	-0.521256	-1.24507	-0.366503	0.476046	-0.214308	-0.184767	-0.071896	-1.3003	-0.443519	-0.33456	0.169198	0.101227	0.473649	-0.44	0.16015		0.413633	0.302507	-0.764338	0.853421	0.588918	-0.339141	-1.21594	-0.856642	-0.213628	-0.0418003	-1.44276	-0.103936	1.02898	0.824604	-0.059354	0.497742	-0.303792	0.745399	-0.824896	0.114856
323	0.52026	-0.67457	0.580814	-0.0178883	0.531559	-1.478	0.0890447	0.794939	0.15765	-0.363776	0.165654	-1.1953	-0.482879	-0.427108	0.256872	0.372219	0.202642	0.635664	0.229953	0.119488	0.971262	0.153048	0.474705	0.059024	-0.526333	1.21569	0.418913	-0.597234		0.468727	0.475454	1.51497	-0.120883	0.100557	2.02855	0.981701	0.239597	1.27925	1.04993	-1.15149	-0.391177	-0.00785284	1.34706	-0.156887	-0.387186	0.441424	-0.103841	0.414605	-0.0887128
324	-0.706153	0.61084	0.660883	2.14618	0.990379	0.0632277	1.26756	-1.5165	-0.159285	1.05209	0.270907	0.00680487	-0.0485865	-0.559574	-0.32267	0.451122	-0.133327	-0.692336	0.784076	0.100278	0.0530866	-0.00590553	-0.199377	0.425925	0.436302	-0.592915	0.912571	0.889146		-1.05479	0.401726	0.177242	-0.337328	-0.778117	0.190414	-0.363451	0.419341	-0.101508	0.437418	-0.280952	0.80515	-0.219279	0.22059	-0.360984	-1.05754	0.175267	0.36383	-0.146049	-0.254333
325	0.202233	-0.326495	1.03945	-0.435784	-1.30454	-0.966021	-0.783781	0.467678	-0.269205	-0.354774	-0.982752	0.293804	-0.0240164	0.43599	-0.0111371	-0.0357754	-0.320884	-0.562499	0.0158129	0.181071	-0.0699554	0.332175	-0.748833	-1.35905	0.544172	-0.328076	0.76056	-0.00421929		0.488898	0.402401	0.173859	-0.458631	0.355479	-0.850629	0.257409	-0.00130666	-0.388958	-0.414749	-0.203117	1.03038	-0.553368	0.111068	1.11781	0.509422	0.0883749	0.434052	-0.714779	0.111907
326	0.199099	0.606104	0.629038	-0.847539	-0.513863	0.738632	-0.343519	-0.0300355	-0.263496	0.732301	-0.0868941	0.248793	0.821142	0.53943	0.157249	0.198388	1.26203	-0.227993	0.529444	0.41999	-0.390884	1.46991	-0.74035	-0.311033	0.0442075	0.335583	0.864686	1.0717		-0.0509213	0.353321	0.195023	-0.0780131	0.636788	0.663434	-0.661081	-0.554358	0.110418	-1.00309	-0.222356	0.06881	1.12681	1.30258	-0.661884	0.181463	0.83569	-0.834777	0.13138	-0.0344447
327	0.434394	-0.788348	1.13716	-0.997669	0.402724	0.288458	-0.380805	0.0508205	1.03123	1.52595	0.794593	1.44215	2.39568	1.2084	0.0370094	-0.0579057	0.322075	0.747405	0.071104	0.417254	0.85735	1.09013	0.0564154	-0.0932538	-0.22578	0.699197	1.33184	0.886834		-0.374266	-1.17287	-0.918092	-0.176284	-0.911363	0.107067	-0.952	-0.0626003	0.0349815	0.346848	-0.47061	-0.609655	0.426372	1.24916	-1.53456	-0.44809	-0.911779	-0.319724	-0.514421	0.0432342
328	0.0469777	-0.18438	0.932626	1.01545	1.39179	-0.350774	0.668303	2.05562	1.42727	1.67143	1.24759	0.853419	1.75961	1.15921	0.450989	0.95051	0.173752	2.78729	1.50128	1.2531	-0.168976	0.0407082	1.46752	0.107893	2.1442	1.20171	0.88795	1.24271		-0.196072	-0.753611	-0.44465	-0.978386	-0.490354	-0.719345	-1.06301	1.36355	-0.124795	0.346315	-0.106833	0.0518435	1.32145	0.448465	-0.687131	0.480703	-1.11492	0.280447	-0.148879	0.215476
329	-0.00749936	-0.830762	-0.0523048	-1.67904	0.339963	-0.441337	1.65519	1.62904	1.38455	1.92927	1.42592	1.38958	1.29435	1.43487	0.355699	0.425577	0.441951	1.33245	0.146561	0.913799	2.39069	2.32553	0.995491	0.837875	1.12439	0.773322	0.655348	0.923506		0.289225	-0.494013	0.0791977	-0.32514	0.48452	-1.04921	1.16546	0.892045	0.3736	1.30988	-0.128076	-0.119406	1.02314	1.72487	0.383666	0.58708	1.38352	-0.605387	0.417002	0.478186
330	0.73812	-0.150176	1.58861	-1.80828	0.3057	1.97553	1.15679	1.79428	1.70032	3.41854	2.11077	1.3827	1.80751	1.87754	0.461666	0.346083	2.44088	2.14635	1.92092	1.67455	1.42728	1.98472	0.00837585	0.388114	0.384588	0.585899	0.975205	1.79868		-0.0708956	-0.0290339	-0.496126	0.776643	-0.302997	-0.75169	1.00693	-0.184245	0.260992	0.550428	-0.0877184	-0.462717	-0.155383	1.2053	-0.511067	0.583134	1.26604	0.241836	-0.513514	0.45153
331	0.27271	-0.720254	-0.223867	-0.769874	0.020978	0.106246	1.31768	3.00293	2.42923	2.75322	1.78407	0.283326	2.71216	1.54847	1.59631	1.25603	1.9519	2.14569	0.769951	0.840328	2.89115	1.15796	1.6341	1.06818	1.669	1.06542	0.0795187	1.26637		-0.387419	0.737485	-1.79977	1.2234	-0.37023	-0.509812	0.0350559	-0.0808636	0.371093	-0.689881	0.241591	-0.310124	-0.157721	0.233969	-1.79913	1.14285	0.791299	1.13116	0.339227	-0.276014
332	2.58461	1.12925	1.0275	0.209301	0.975836	1.0646	2.1318	2.24186	2.54581	1.94471	1.18894	1.89224	1.46385	1.81901	1.12075	1.36453	3.34248	4.49622	1.3713	0.889646	2.03238	1.0724	1.27475	1.38665	1.48813	0.633583	1.46752	1.88249		-0.295056	0.246243	0.904236	0.990271	-0.17043	0.404111	0.296698	0.74023	0.320827	0.517439	1.38888	0.431471	-0.0786955	0.962663	0.311472	1.15172	0.775216	0.00138437	1.72564	-1.32948
333	1.46302	0.973989	-0.0581413	1.14434	-0.365929	1.12677	1.39483	3.14706	1.96381	1.93323	3.61876	2.26252	1.46963	2.69773	1.68762	1.39158	3.65483	2.8063	1.83305	2.33679	1.81168	1.67519	2.20895	1.04307	1.50035	1.57701	1.56643	1.45907		-0.147578	-1.06904	-0.861683	0.140408	-0.504101	-0.800171	0.669771	-1.11461	0.0995599	0.883679	0.47049	0.00303659	0.592831	0.937468	0.532916	1.26438	0.777822	0.209801	-0.0264234	0.402687
334	2.33561	-0.560288	-0.639279	0.898383	0.973102	1.87776	1.80343	3.18895	2.10605	2.70743	2.50591	2.1019	3.4403	1.74528	1.08905	1.25071	3.95417	3.14897	1.52039	2.49538	1.78212	2.36698	1.48738	2.27689	2.22338	2.01547	2.50385	2.62385		0.165907	0.109118	0.230448	0.558051	-0.68668	-0.462809	0.530171	-0.302095	-0.415175	1.20052	-0.235506	0.786874	0.508851	1.63217	-2.10504	0.884445	0.82194	0.284203	0.0518671	0.806693
335	1.95468	-1.40573	1.33548	0.433732	1.92634	2.02368	2.60398	2.54079	2.92273	2.10485	1.61777	3.47231	2.15973	2.4263	2.09369	1.78408	3.94519	3.10278	0.613292	1.98189	2.31567	2.03033	1.07389	1.52431	1.33037	2.0629	2.13716	2.09212		-1.49539	0.0608714	0.378269	-0.469208	-0.27223	-0.356618	-0.433086	-0.47348	-0.594051	-0.0653344	-0.228892	0.338355	1.41222	1.37821	-0.198037	0.315463	0.599749	-0.521399	-0.420275	-0.133503
336	2.61319	-0.0296168	2.20829	-0.176317	-0.0115869	1.6837	2.32105	3.33992	2.49976	3.99014	3.47771	1.41415	1.58952	3.00123	1.36608	2.23943	4.7283	3.52495	1.57178	3.35789	2.61864	1.8265	1.55864	1.99001	3.76193	1.47308	1.3946	2.57753		0.308621	-1.57305	0.350505	-0.135585	1.73247	1.29446	0.314892	0.618222	0.0284552	0.648872	0.678836	-0.521615	-0.561506	0.474739	1.24927	-0.268244	0.73808	0.0151302	-0.562686	-0.791809
337	2.75729	1.49124	1.72375	-0.314089	0.0836695	1.35938	1.74413	3.03782	1.65702	4.92463	1.71282	1.90776	3.0364	3.29671	1.94762	2.23415	5.51447	4.11288	1.61152	3.8886	2.34105	2.38878	2.97669	2.27987	2.44998	2.45872	2.63752	3.97445		-0.557376	-0.847738	0.402836	1.20345	0.505227	0.616335	0.460405	-0.13368	-0.245481	-0.429792	0.559765	0.125671	2.08156	0.00662645	-0.823683	0.251455	-0.908019	0.213948	-0.182768	0.482152
338	2.12265	0.327465	0.881841	2.2553	1.77375	3.34719	2.71371	3.05673	3.25814	3.35835	2.82063	3.23414	3.82768	2.77072	3.00472	1.4308	4.43145	4.14537	2.30394	4.14139	1.58978	2.44832	2.11031	2.59667	3.12852	3.31947	2.02753	3.76765		0.650622	0.984984	0.0782455	-1.06373	1.36469	0.122907	0.171114	0.300314	0.50964	0.71545	1.51624	0.789974	1.16965	1.02275	-0.204415	0.631435	-0.554863	-0.185688	0.462041	0.346453
339	2.16372	1.50023	2.1741	-0.612659	0.954754	2.18122	2.48155	3.55036	3.44887	3.53283	1.39658	2.44023	2.963	3.32457	2.06795	2.14338	5.42566	4.03062	1.75071	3.19029	3.42084	2.53318	1.64336	3.7756	3.27347	3.2316	2.98987	3.41254		-0.413278	-0.297487	-0.367921	0.72385	1.23134	1.36753	-0.542311	-0.378972	0.634764	0.186542	-0.0989505	-0.389542	0.179183	0.570639	0.296098	-0.223385	0.701889	0.0810311	0.410625	0.188789
340	2.02205	1.99605	1.65339	-0.330583	1.51512	0.848281	3.30031	3.72115	3.70223	3.18382	1.83078	2.0805	3.30931	3.33406	2.19414	2.83303	5.6935	5.81797	1.5474	4.17658	3.31774	2.41819	2.64347	3.08906	2.4676	1.48146	3.51257	3.12469		0.625012	-0.315643	0.634962	-0.574396	-0.902335	1.00867	-0.887066	-0.761495	0.720571	0.144513	-0.879538	-0.0728581	1.54935	1.3311	-0.540808	-0.696564	0.172802	0.352657	0.294374	1.39876
341	2.28412	1.52033	1.62767	1.00151	1.85149	1.2435	3.44816	4.08301	4.05737	4.3369	4.11631	2.14246	3.99051	2.44753	2.81697	2.62278	6.16344	5.73246	1.92529	5.0898	3.49232	3.29062	2.84647	3.78872	2.66118	3.34471	2.43013	1.87613		-0.863731	-0.0731623	-0.59615	0.275183	0.0716747	-0.431951	0.122414	-0.587452	-0.955348	0.26392	0.675949	-0.00253662	0.136441	0.437502	0.142637	-0.793358	0.192198	0.310368	0.301647	-0.735239
342	2.72367	1.75148	0.979245	1.68199	1.2417	2.30669	2.35095	3.94615	3.81045	3.32759	3.52272	2.32215	3.92291	3.1457	2.53718	2.28302	4.51839	5.6218	1.80543	3.96976	3.17315	3.15613	2.56187	2.34451	2.24505	1.52579	3.48094	2.67298		-0.180416	0.0735943	0.176492	0.416496	0.734542	-1.13404	0.127288	0.123709	-0.270233	0.377659	-0.0783992	-0.930768	0.0987884	-0.187199	-0.0607594	0.591699	0.721964	-0.0294111	0.352488	-0.359636
343	3.91935	1.01375	1.13307	1.80728	0.790854	2.3656	2.38335	4.26678	3.28887	2.88182	3.6417	2.39703	3.40242	3.22193	1.92657	2.42621	5.83207	5.60859	2.76127	3.82553	3.00556	2.98194	3.40072	3.26811	2.56859	3.45153	0.976513	2.67318		-0.173996	-1.57078	0.325715	0.313752	0.931772	1.26207	0.0589725	-1.18925	-0.972267	0.236787	1.33615	0.0445038	1.37387	-0.0247039	-0.469074	0.444569	1.10693	0.0678791	0.14332	-0.359471
344	3.47973	1.16848	1.31613	-0.0684051	1.25364	2.15246	1.94486	3.19489	3.53004	4.55818	2.31122	3.48673	3.7189	3.29914	2.82459	2.62538	5.3432	7.10131	1.17763	4.70422	4.90876	5.21069	2.8929	3.86757	1.16317	3.73076	3.39036	3.33705		-0.420085	-0.531896	-0.971762	0.270387	1.12922	0.423864	0.735051	-0.502764	-0.166934	-0.402055	1.11686	1.52825	0.108086	-0.0932931	0.204081	-0.0554618	-0.472398	0.326987	0.858577	0.656812
345	3.55487	1.3346	2.39421	1.36736	1.37042	2.09068	3.49136	4.34132	3.77451	4.38106	3.41471	3.50985	3.54455	4.05759	2.07836	2.26787	4.27767	5.12411	2.28844	5.12325	4.85454	4.25603	3.98449	2.38397	2.19179	2.69841	3.81218	3.54535		0.652024	-0.908481	0.264807	0.163756	-0.301138	-1.01301	-0.201441	0.421689	0.406245	-0.939497	-0.500938	1.13265	0.9061	-0.761052	0.257754	0.210673	0.485564	1.08999	-0.47384	-0.322274
346	4.00446	2.20701	1.69359	0.535708	-0.118343	2.44099	3.02261	4.32422	3.20763	3.7389	3.75442	2.72182	5.08555	2.0599	2.0849	1.43692	6.72836	4.98802	1.58648	4.70941	3.27138	4.44052	3.52134	3.14606	2.53972	2.95195	3.35229	4.00387		-0.211099	-1.29762	-1.36732	-1.29011	0.917197	-0.575742	0.353955	-1.12717	0.117149	0.778072	0.613761	0.693463	-0.0517437	0.722866	-0.105874	-0.215224	0.237967	0.60644	-0.826831	0.00601112
347	4.11017	1.92357	0.886968	0.488825	0.840369	2.58599	2.9886	4.16951	3.42239	3.55176	2.02232	2.66174	3.96955	2.94311	2.77461	3.84194	4.2614	7.10236	2.28239	4.49449	4.74692	4.68907	3.33666	3.70061	3.42815	3.76141	4.70473	2.24397		0.436738	-0.372874	-0.528804	0.323102	-0.362849	1.11793	0.420187	-0.574481	1.52219	0.833079	0.724763	-0.0410102	1.00534	1.62555	-0.220248	0.89461	-0.294482	0.075054	0.626887	0.5899
348	2.70082	0.338336	1.47575	0.337323	1.94581	1.4584	3.2117	5.44739	3.8666	4.35834	2.63201	3.05289	3.01279	3.0693	3.21039	2.61178	5.2929	5.06899	1.73497	4.98812	3.84981	3.00246	3.39218	2.64367	2.86901	2.65144	5.03331	5.27741		0.163077	0.0434031	1.44406	0.253432	1.17074	0.0507153	-0.916027	0.0830747	0.228853	0.405032	1.13783	0.356241	1.75908	-1.48783	0.928493	1.12265	-0.0745394	0.314635	0.106316	0.675617
349	2.19195	0.312255	0.726023	0.231909	1.94217	1.34276	2.35509	5.16657	3.86916	3.74153	3.99112	3.75643	3.01955	3.0294	2.54366	1.90621	5.34164	3.3294	2.49483	3.55089	3.79366	4.56216	3.60122	2.64535	2.7922	3.88188	3.4844	3.58351		-0.137409	-1.57886	1.64906	-0.73996	-0.691905	-0.672092	-0.193246	-0.3204	0.348854	0.328261	0.544762	-0.701858	0.104798	0.645686	-1.52216	1.07416	-0.322583	1.52232	-1.21077	-0.344574
350	2.92742	1.14515	1.75635	1.7738	2.16164	1.33335	4.60256	4.82538	4.20886	4.32364	2.28878	3.22533	2.57844	4.14168	2.19823	2.93084	6.32972	5.93954	1.46421	4.13282	3.39412	3.62887	3.39233	3.49826	3.25069	2.99653	4.78372	4.11596		-1.14338	-1.17044	0.0788305	-0.716565	-0.975247	-1.10945	-0.549327	0.275383	0.0931401	1.27929	0.397593	0.701186	-0.458724	0.225236	-0.448852	0.507302	0.548229	0.38634	0.269491	1.51169
351	2.47176	0.71865	1.73044	0.820468	1.40463	2.78372	2.80758	4.22433	4.23262	5.37637	2.94476	3.74915	3.17205	1.77097	2.8312	2.17728	5.67763	6.24518	3.08347	3.80829	4.38791	2.86903	2.82579	2.79977	1.6019	4.00101	3.61704	4.61759		1.13663	0.0856449	1.00082	0.407418	0.398047	0.989798	1.87436	-0.410899	0.53559	1.40151	0.829201	-0.215306	1.02588	-0.639659	-0.175861	-0.020706	0.402439	0.802454	-0.927757	0.337675
352	3.36258	0.814404	2.14737	0.26134	2.49954	3.761	1.80369	3.83921	4.37642	5.31359	0.718181	3.41468	4.21411	3.97511	2.75251	1.28894	6.11684	7.28197	1.76422	5.45128	4.77324	3.70897	3.37354	3.38803	1.43476	4.08324	5.37262	3.8403		-0.590869	-1.21031	0.950707	0.342397	-0.182122	0.67035	0.184311	0.74082	-0.743818	1.16018	0.139864	0.237751	-0.0546939	0.165621	-0.699137	-0.241709	-0.336325	-0.118986	0.807548	-0.414685
353	2.81092	1.57148	1.24064	1.07964	1.74471	2.68012	4.09784	4.77442	3.24559	5.35179	4.62022	2.51887	4.02939	2.35076	2.37691	2.81268	5.8377	5.86419	0.789134	4.85336	4.2166	4.31893	3.50414	2.29873	3.79406	4.25194	4.30659	2.80061		NaN	-0.785666	0.894325	-0.57917	-0.529352	0.674259	0.10511	0.0101874	0.518944	1.72626	0.597104	0.599232	1.56144	1.07971	-0.00255081	-0.386365	-0.00858587	1.41108	-0.463446	0.755029
354	2.61863	-0.0944488	1.98656	1.35518	1.19009	3.40735	2.37325	3.87568	4.36538	4.80177	5.06644	3.50219	3.40925	3.20903	2.16108	3.74162	5.47484	5.66514	1.54722	4.71022	4.77492	3.12397	2.5803	2.36803	2.94683	3.90937	4.34687	4.21517		-0.850157	-0.687754	1.23734	-0.347325	-0.611486	-0.344386	0.635858	1.20441	0.427671	-0.0153282	1.62146	0.098076	0.819475	1.35916	-0.312008	-1.68757	-0.80766	-0.5592	0.180455	0.115142
355	3.44246	1.00156	2.15123	1.23763	2.19269	3.24928	3.00196	5.00906	4.92831	4.9961	3.96573	3.24384	4.16571	3.15332	2.76864	2.56012	6.75203	5.25547	2.87787	4.00764	4.53334	4.70764	3.0443	3.29038	3.35907	4.79237	2.35679	2.53371		-0.932941	-0.194657	0.658343	-0.0656972	2.66172	1.08954	0.401834	-0.445894	-0.281266	0.54214	0.257297	-0.0558789	0.292529	1.61405	-1.69932	0.0612056	1.16956	1.23705	-0.335805	0.580984
356	2.59798	0.948356	1.83594	0.776595	1.66995	1.0665	4.00641	5.03436	3.91028	4.51085	2.87744	2.49804	2.66394	3.97522	3.57484	3.64852	5.15266	6.13727	2.64782	4.655	4.99644	3.70052	3.70902	3.56843	2.71133	2.88134	6.47159	4.73464		-0.0809551	-0.667149	0.510395	0.426625	1.83155	0.503131	0.372442	0.517344	-0.284506	1.62184	1.1313	0.722461	0.19257	1.10079	0.0956303	0.411346	2.06819	1.291	-0.41668	0.0174211
357	3.28079	1.23627	2.6423	0.44834	2.18635	1.12539	2.37794	5.10837	4.42088	4.34059	3.87451	3.78158	3.50242	3.56168	2.81351	3.32865	5.2535	6.51397	1.32663	4.31528	4.8272	5.5552	2.3002	2.8607	2.98433	4.18973	5.27964	4.87412		-0.591624	-0.386598	-0.755715	0.324045	-0.395451	0.953921	0.894198	-0.396029	1.03353	-0.274287	1.24511	0.607863	1.10068	0.464576	-0.826558	0.52044	0.537384	1.16683	-0.500726	0.1985
358	4.09318	1.32346	2.59737	0.927011	1.75614	2.50502	3.83073	5.00291	5.63478	3.99072	4.33883	1.98716	3.12102	3.17452	2.92505	2.82226	5.95922	6.18788	1.73561	4.42405	4.74905	4.80232	3.98923	3.79342	2.70793	4.15931	4.19664	4.58881		0.637328	-0.0132357	-0.0034368	0.344485	0.540904	-1.39856	0.506968	1.27971	-0.204714	1.44486	0.140436	0.823857	0.835417	-1.19305	-0.0673969	-0.0943158	0.50347	-0.259964	0.833108	0.832635
359	4.58206	1.24571	1.66946	0.827442	2.3631	3.48671	4.06624	4.44816	5.44808	4.85229	3.58674	2.74982	3.81719	2.88887	3.14083	2.51188	5.16544	6.6825	3.67043	4.56895	4.80599	5.71325	3.39486	3.38078	3.53267	3.84141	3.50855	3.93956		0.231181	0.9743	-0.790947	-0.000562007	1.07321	0.510406	0.753557	0.0677207	-0.177302	0.770869	-1.06215	0.318419	0.846987	1.47995	0.396261	-0.431721	0.151376	-0.703954	0.465861	0.0293115
360	3.6994	2.09171	2.71578	1.77624	1.21587	2.16186	3.54377	5.78541	4.24043	4.74701	3.69047	2.16346	4.42082	3.09009	0.972075	1.71787	6.22947	6.64928	0.890777	5.41139	6.39858	4.42903	2.37333	2.66036	1.82928	4.37764	4.76796	4.76667		0.7628	0.117351	-0.0371559	0.0759172	-0.20884	1.67303	-0.857819	-0.342812	0.861113	0.109743	0.685568	0.674767	0.153574	0.695066	-1.70354	-0.71287	0.307002	0.521357	-0.458859	0.838498
361	3.47655	1.95915	1.7517	0.993837	1.63433	0.871452	4.24737	4.46113	5.54535	3.80249	3.3195	3.41327	3.46802	1.92722	2.28366	2.63308	5.69685	6.89849	2.79871	5.32224	5.15816	3.92707	3.55105	3.89377	2.82747	3.94161	4.96484	4.83593		-0.0362386	0.257302	0.422737	-0.777712	-0.183103	-0.0845969	0.383811	-0.144774	-1.54572	0.829903	0.714054	0.376992	-0.0585852	1.55647	-0.192693	0.86212	0.900034	1.40241	0.81204	0.430989
362	3.27668	1.43109	1.50644	1.09572	1.77591	3.04933	3.81962	4.15263	4.82474	5.03055	4.59962	2.7809	2.99495	1.31187	2.26141	0.960219	4.3327	5.65928	2.01291	4.59863	4.10733	4.69149	2.64049	2.10786	3.60958	3.7259	5.57555	4.3282		0.566337	-0.0444991	-0.238933	1.59501	0.36006	0.188813	-0.0580774	0.306442	-0.388452	-0.474784	1.27504	-0.0526423	-1.09005	-0.483067	0.0304371	1.27615	2.03616	1.28287	0.510567	0.748549
363	2.65109	1.75738	1.40067	1.72727	2.48828	2.34302	4.72313	4.72181	5.40145	4.2934	4.09097	3.24366	3.7748	2.64668	3.21842	3.15518	6.01242	5.21524	1.81416	5.18814	5.44867	5.21591	3.2264	2.93569	2.59186	4.22192	2.40595	4.41213		1.15663	0.570498	-0.242783	0.617948	0.221117	0.0581789	0.106885	0.463392	-0.5556	0.545757	1.40836	0.264748	-0.446927	0.513163	0.00780657	0.776655	0.892885	0.224538	0.983533	-0.716712
364	3.42776	1.67879	2.08578	2.99521	3.07905	3.00204	3.78755	3.47797	3.869	3.91864	3.85424	3.03708	4.02021	2.18793	2.8175	2.64879	4.35243	4.37703	2.94688	4.90492	5.47799	5.57751	3.37881	2.37541	3.05369	4.62444	4.58034	3.03954		0.136422	-0.00621388	0.394315	-0.398341	0.0619244	-0.108032	-0.660727	0.0869261	0.13437	0.339643	0.600099	0.514357	0.900456	0.681568	-0.0653416	-0.688806	0.713685	0.467302	-0.388143	-0.012876
365	3.46166	0.993801	2.22283	-0.186623	2.85508	2.44957	3.76716	4.08694	4.769	4.26433	4.56963	4.18696	3.58003	3.60828	3.68902	2.58837	5.92025	6.86215	2.21841	4.77354	5.12834	5.34632	3.65099	3.04842	3.93419	3.32119	4.40362	4.76424		-0.0161957	-0.897576	1.10603	0.521613	0.251017	0.992173	-0.633171	0.395326	0.361042	0.91272	1.77581	0.0818508	0.0408494	2.50181	-0.417152	-1.49648	0.255525	0.392225	-0.236094	0.110844
366	3.64542	1.80198	1.98512	2.07385	2.81175	3.39586	3.55999	4.68275	4.28561	3.94721	4.09502	3.65884	4.53976	2.96219	2.3713	2.21361	5.75789	4.22979	2.93821	4.49684	5.29227	5.47275	3.1466	1.74143	2.70492	4.50899	4.84341	4.50102		0.672296	-0.159816	0.36234	0.963608	-0.0541728	0.00507557	0.143616	-0.636352	1.28151	0.785751	1.47982	-0.0303322	0.755732	0.490789	-1.22749	-0.198752	0.662085	0.316648	0.331408	-0.21804
367	3.79486	2.47667	2.2874	2.17951	3.02089	3.85552	4.57649	4.57952	4.17159	4.36607	2.90569	1.45971	4.7072	2.97352	2.61978	2.5728	5.70825	5.73346	2.06351	5.27764	4.83663	5.08786	4.15867	2.69652	3.35331	4.21551	4.49938	3.19752		0.265529	0.237723	0.644427	-0.38198	0.752267	1.66601	-1.75895	-0.452593	1.00458	0.812421	0.647949	-0.0576992	0.356813	1.01674	-1.10845	-1.2313	0.464499	-0.17743	-1.00138	-0.563135
368	3.66574	2.74615	0.861796	2.66539	2.33551	2.59071	3.32833	5.13308	5.1403	5.09551	4.29875	2.54531	4.66641	2.44725	2.02722	3.16104	5.77125	6.03503	3.50679	3.52568	5.39555	5.13267	3.83939	1.84393	3.84355	2.51779	4.20296	4.62502		-0.0804987	-0.553061	0.354975	0.175072	0.895282	0.89596	0.0869055	0.786581	0.65752	0.491757	0.798637	-0.673881	-0.306136	1.10369	-0.22387	0.281343	-0.253189	0.911073	0.71653	-0.724109
369	2.66739	1.55391	1.46149	0.592517	3.47482	2.87894	3.82212	4.32117	4.29788	4.9767	4.95211	3.75647	4.54252	2.38549	2.8711	2.47429	6.55576	5.59251	2.18151	4.91848	5.25886	4.17746	2.82387	4.36561	1.59983	5.03612	4.94857	4.74813		1.16589	0.492338	0.753021	0.40607	-1.34313	0.0433008	-0.791613	-0.736434	0.0985474	0.513333	1.43561	0.596737	0.0462477	-0.552229	-0.72333	-0.496111	0.779132	0.602164	0.026176	-0.209177
370	3.90741	1.19029	0.998701	1.83256	2.05559	3.41611	3.49037	6.71165	3.67114	5.14214	4.07878	3.4886	4.12325	1.26906	3.36583	2.35129	5.20896	5.75365	2.17708	4.2486	4.46461	4.90837	3.2424	2.57406	3.57624	4.07464	3.46679	4.02585		1.39901	0.753148	-0.183479	1.55701	1.20862	-0.488607	0.267796	-0.00288272	-0.126354	0.653832	0.965398	-0.568864	0.816655	0.931879	-0.877167	0.334571	0.589459	1.28085	0.172187	-0.0024807
371	2.70467	2.43337	2.04896	1.66039	1.64942	3.07777	4.0005	4.25517	4.95811	4.88653	4.26244	3.75496	4.14674	1.9189	2.79624	2.79093	7.22009	5.3995	2.06959	4.15788	4.73471	4.30565	3.07308	2.88166	3.40567	4.94965	2.87752	4.21796		0.234235	0.783251	1.15276	0.023411	2.16595	0.201914	-0.563193	-0.690603	-0.727386	0.762113	0.503882	-1.02826	2.01422	-0.178057	-0.467111	-0.989807	0.0867488	-0.145006	0.426861	0.180731
372	3.59679	1.89207	1.56541	0.514249	2.83372	0.199171	4.76368	3.7308	5.03499	4.52645	3.4577	2.4995	3.39415	3.54675	1.01541	3.22133	6.33967	4.10191	1.51865	4.44908	4.57866	6.33776	2.94271	3.72906	2.96077	4.42141	5.03239	4.01291		-0.161648	-0.562543	0.157225	-0.500062	0.788046	-0.053112	1.48403	1.04033	0.00838909	0.179422	1.38867	-0.898054	-0.179143	0.711244	-0.209239	0.840276	-0.172057	0.586041	1.63103	-0.454532
373	4.64444	1.90314	0.74924	0.405138	2.94638	2.68555	3.34225	4.06302	4.87396	4.39315	4.63916	2.39192	3.05526	3.22283	2.36033	2.23714	6.39463	6.01164	3.25824	4.85464	4.90434	5.77688	3.94309	3.32467	1.92156	3.33062	2.06899	4.16951		0.220476	0.210118	0.510878	-0.827463	0.997548	-1.06416	-0.361924	0.0703087	-0.819135	0.998306	1.55902	0.766017	2.81663	-0.277079	0.777279	-0.242833	0.635249	-0.224127	1.07574	0.799813
374	4.79413	2.83393	0.901676	1.17344	3.76341	2.33057	3.85803	3.93956	3.39022	2.07048	3.7525	2.50304	3.75087	2.99841	2.78327	3.25753	6.54479	5.97091	1.91228	5.68185	5.37427	5.48537	4.3542	2.12441	2.8367	3.66557	3.77189	4.28937		-0.324151	0.383394	0.188732	-0.452066	0.458518	-0.228724	0.65194	-0.457514	0.261432	0.915778	1.00452	0.660234	1.13587	1.06825	0.129272	1.18884	2.4103	1.34469	0.801998	-0.811343
375	4.18805	2.51069	2.42704	-0.279783	2.34288	1.83169	3.99964	4.68501	3.94094	4.11135	3.97909	3.09345	4.10257	3.54048	2.28969	3.47629	6.61095	6.70267	2.00675	4.44917	5.35691	5.39795	3.80766	2.94979	2.79766	4.12446	5.56972	5.33271		-1.45405	0.127168	-0.230398	0.465395	-0.392461	2.08831	-0.060502	0.170076	0.412688	1.25768	0.361969	0.568726	1.37258	1.24183	-1.44706	-0.123967	0.430589	0.125427	0.399428	0.76923
376	3.10413	2.57536	2.21407	1.37563	3.88331	1.5122	4.46126	4.57192	4.68557	5.42875	4.0367	3.71045	3.93828	3.38772	2.64056	2.8708	7.08885	5.61965	1.29357	4.07203	4.39299	5.4121	3.85808	2.24048	4.65141	4.02629	5.61627	4.27934		-0.202879	0.177885	-0.252201	-1.09633	-0.231652	-0.93337	0.949967	0.442697	0.920002	1.69789	1.13823	0.312982	2.22257	1.02289	0.582192	-0.660399	0.237067	-0.493145	0.570693	-0.202269
377	3.54577	2.95057	1.28822	1.08805	0.958288	2.90854	3.55357	5.10163	3.82658	5.14596	3.26167	2.12302	3.63028	3.35811	2.37291	3.06612	6.56206	6.67635	2.46486	4.19074	5.36336	4.70463	4.32153	3.59329	2.0771	4.06546	5.1648	3.8462		0.130893	0.783975	0.579456	-1.5727	0.594052	-1.3391	-0.082777	-1.60216	0.575787	1.33377	1.47849	0.194524	0.271142	1.30865	-0.0622221	-1.38102	0.203118	0.492055	0.796851	-0.0734921
378	2.22512	2.71899	2.11221	0.970416	1.6757	2.14744	3.81914	5.47056	3.23463	4.67946	2.82358	2.51318	3.53113	2.30214	2.1245	2.78854	6.38738	4.70848	2.52409	4.86184	5.59848	6.04413	3.73048	3.28274	2.3614	4.17287	3.95482	2.56039		-1.06701	0.406793	-0.31136	0.742252	1.03324	-2.38017	0.454563	-0.502139	0.67273	-0.347992	0.271753	0.807293	1.13296	1.57686	-0.729159	0.428586	1.2844	0.355333	0.705371	-0.20237
379	3.47256	2.93818	0.81422	3.37868	2.58465	3.10016	3.70849	3.73086	3.34951	4.16561	3.66379	3.28742	4.19513	2.77332	2.63478	2.81975	5.51049	6.91641	2.4427	4.30348	4.26908	5.5122	3.82191	3.25913	3.13365	4.25414	4.84664	4.74376		-0.793794	1.22051	-0.291868	1.07817	0.691309	-0.335255	-0.295306	-0.18086	-0.474356	-0.187043	0.785614	0.119269	0.903878	1.56265	-0.346156	0.0778604	0.595443	1.97453	-0.232419	0.86914
380	2.75785	2.19689	0.275188	0.917351	2.34816	2.5307	3.85062	3.35522	5.14638	4.00328	4.79877	2.86291	2.92088	2.1036	2.41488	3.41092	5.82124	6.37596	1.86138	4.0359	4.93579	4.14915	3.07322	2.45016	3.25241	3.76362	4.86323	3.55901		0.29775	-0.309283	0.30906	-1.04134	0.390029	-0.416781	0.916478	0.632621	0.431432	-0.00653154	0.646162	0.793419	-0.888884	2.28121	-0.369036	1.08617	0.290477	0.437894	0.00227266	-0.157562
381	4.26164	1.99807	0.937054	-0.951631	2.44999	3.1102	3.53456	5.20031	5.01204	4.4649	3.72132	1.84673	4.33728	3.68817	1.76131	3.0243	6.14479	3.84461	2.4727	2.15638	4.58239	6.09288	3.41454	3.0151	1.84779	4.00782	5.04498	5.16869		0.286861	-0.103503	1.15636	0.411879	0.337964	1.01549	-0.161226	0.391826	0.295949	1.20356	1.41968	-0.552868	-0.150141	0.540349	-0.500368	0.553569	0.403433	0.67518	0.0848461	-0.250865
382	3.64912	1.8798	0.684863	0.0471056	3.60886	2.13142	3.53864	3.6639	4.45045	4.29544	4.08902	0.927557	3.2863	3.0931	1.53186	3.63682	6.89661	5.52302	2.30228	3.52644	4.74403	5.68088	4.05177	3.14191	2.02778	4.27357	4.96112	2.68208		-0.189845	0.368305	1.44515	-0.81629	-0.0338501	-0.306074	-1.12814	-0.65415	0.596306	0.251946	1.63325	0.498055	0.646302	0.871068	0.352039	-0.33214	1.09597	0.619506	0.679541	1.04499
383	4.02508	2.37092	2.15334	0.272972	3.83425	2.63095	4.18936	4.85462	4.075	4.64996	4.34388	2.41946	3.18485	3.08977	1.68734	3.72007	6.81365	6.97461	2.93319	4.73785	5.13529	4.96558	3.40829	3.56339	3.2176	4.62106	4.38008	4.51874		-0.24878	0.459361	0.468186	0.223586	0.744313	-0.172616	1.02189	0.616135	0.800062	0.250049	0.634421	1.52867	-0.979435	1.72506	-0.655594	0.215517	0.656402	1.26704	-0.598446	0.144122
384	3.13353	2.35391	1.79724	-0.396394	3.0034	2.8077	4.33757	4.49984	4.70577	5.1102	4.71489	2.64211	2.8005	3.73501	2.62921	3.13565	5.87698	4.93102	1.93656	4.33599	4.56569	6.08326	3.43876	2.18818	2.68135	3.9755	4.7728	3.68441		0.473616	-0.537256	0.499253	-0.421626	1.14861	-0.387691	0.792888	-0.29285	0.232723	0.688382	0.259228	0.784904	0.986651	0.657176	0.0554341	0.0685071	1.64014	0.522151	0.282768	0.589374
385	3.02359	3.05703	2.39442	0.973448	2.72423	2.43083	3.71866	3.53712	4.21199	3.11569	3.82163	1.88284	3.76151	3.20613	2.27362	3.09616	8.22066	5.93351	0.92271	4.65934	5.50123	5.14037	3.28919	2.78768	2.84365	3.09059	5.82865	6.01522		0.738503	-0.713808	-0.302491	-0.509153	-0.151153	1.0056	-1.39479	0.0960898	-0.980969	0.254185	1.13609	-0.184082	1.12698	1.68944	-0.310133	-1.55525	0.272037	0.509114	-0.218457	0.961118
386	3.57317	3.1098	1.37553	0.882672	1.93204	1.94751	4.7878	4.35767	4.30838	4.88246	4.81176	2.3787	2.98935	4.11624	1.6846	3.46577	5.21127	6.4846	2.44802	3.87729	5.78392	5.5178	3.28961	2.61748	1.91358	4.4983	5.21215	5.99063		0.432413	-0.459575	1.01399	-0.0745094	1.0323	-0.421788	-1.18134	-0.37339	-0.241216	1.06361	1.10725	0.857358	0.664872	1.49911	0.105367	-0.548318	0.593673	0.553857	-0.547937	0.0828343
387	2.7794	3.68888	0.285635	0.268338	2.4839	3.14929	3.64948	4.93619	4.66933	5.40533	3.39124	2.47036	3.01688	2.95264	2.46795	2.68988	6.09243	3.34567	0.847421	4.76816	4.53208	5.12416	2.98542	3.23258	2.59976	2.5813	5.33019	5.10587		0.813201	-0.188577	0.436358	-1.87662	0.843424	-0.282317	-0.279946	-1.16848	-0.442428	0.252435	0.984531	0.551253	1.00567	1.64141	0.622904	-1.26047	0.690413	0.40416	0.380084	-1.0287
388	2.71074	3.01432	2.50508	3.83582	3.43503	2.55456	3.0525	4.43578	4.04265	3.68503	3.14805	2.91969	2.95993	2.84101	2.60963	2.94231	7.10469	5.49716	2.46448	4.22028	5.11169	5.39506	3.28465	2.79449	3.10768	3.95897	5.86043	3.35277		0.437962	-0.354043	1.23005	0.740598	-1.21404	-0.891966	0.261688	-0.545326	-0.826681	-0.115828	1.06284	0.803368	0.941117	0.393895	-0.632052	-1.8507	-1.07109	1.31611	0.028228	0.41075
389	4.71203	1.84968	1.05748	1.31752	2.39892	2.14832	3.04106	3.33861	4.82135	3.54974	3.135	3.15909	3.9608	2.11255	0.200356	3.16004	5.74315	5.47863	2.32347	4.88052	4.6559	5.18459	2.57895	2.31739	1.67114	4.07714	3.84876	4.56422		-0.0613469	0.289548	-0.84682	-0.723635	2.0803	-0.593943	-0.157989	-0.594976	-0.513043	1.02643	1.07732	-0.281734	0.756767	1.97693	-1.34741	-0.809267	0.458969	-0.193847	0.0178559	1.13104
390	4.31076	3.54355	1.21004	0.831458	3.02875	1.26818	3.79563	3.34542	3.50142	3.88027	4.24169	1.40932	4.18186	3.02163	1.81466	3.09356	6.16035	6.03337	2.25807	3.65712	5.03111	5.4777	4.76477	2.64776	2.93812	3.82972	4.79388	5.37775		1.15356	-0.763057	1.9167	-0.665322	-0.117532	-0.910623	0.660417	-0.690813	1.40311	0.622066	1.02512	0.880523	0.599265	1.24296	0.279565	-2.00003	0.649277	0.854415	-0.0348054	-0.146016
391	3.62105	3.31215	1.96746	1.48556	2.75766	4.472	3.96607	5.3724	4.21163	4.20693	4.29235	2.51885	3.48573	3.32552	2.80305	3.18677	7.71244	6.36805	1.97645	5.02134	5.08171	5.98331	3.1676	3.04082	2.62215	3.91739	5.17988	4.05863		-0.6063	-0.564212	0.173919	0.37565	0.555799	0.410689	0.913109	-0.487839	0.0219678	0.377828	2.20974	0.644931	0.63606	2.03101	-1.07988	-0.693137	0.694825	-0.164642	0.188794	0.514836
392	2.68031	3.22425	2.76823	2.82662	2.10058	2.57218	4.65921	3.77422	4.24079	4.7324	5.56525	2.39816	3.31777	2.45278	1.5597	3.42046	7.3195	5.86405	2.51326	4.11643	4.9651	6.11859	3.57236	2.10476	2.74792	4.06053	5.66376	4.485		-0.833459	0.672998	-0.679416	-1.57397	0.185663	-0.0748199	0.423011	-0.465988	0.902956	-0.657126	0.513847	-0.312527	0.973491	1.89937	-0.541638	-0.206652	1.02819	1.34046	0.268795	0.557153
393	3.878	2.89081	1.89361	1.08321	4.00153	3.38749	4.44331	4.60539	3.75845	4.86777	4.01153	2.84899	3.69699	2.52584	1.96132	3.89038	6.47833	6.46267	2.81597	2.72557	5.16476	4.06335	2.92026	2.79896	2.06526	2.43182	4.82128	3.83371		-0.31905	0.183939	-0.140163	0.25608	1.59415	-0.812901	-1.00749	0.217375	0.520607	-0.616151	1.47608	1.23266	-1.47748	1.06521	0.222937	-0.0375115	0.820772	-0.0803314	0.77097	-1.1239
394	3.6977	1.6959	1.20963	1.81156	3.28097	2.83584	3.48678	4.54063	4.10393	4.41422	3.91963	2.5966	3.55549	3.32373	2.25068	3.46537	5.77988	5.54933	3.07289	4.19135	4.99131	5.69274	2.70167	3.15703	3.64952	4.40986	5.1322	4.48671		1.09483	0.35538	0.193648	0.150056	-0.473653	1.15238	-0.233837	0.989152	0.201238	0.903424	0.90744	0.418664	-0.295836	0.00791408	-0.226379	-0.8801	0.723482	0.745001	0.274585	0.0297571
395	3.3515	3.19821	2.55242	1.70864	2.36729	3.75176	2.82701	3.69347	1.83198	4.22172	4.60991	3.07137	1.57882	2.27397	2.59577	2.49337	6.55604	3.78862	1.92917	4.35645	5.03429	4.8165	2.43383	1.90427	2.15392	4.33564	5.59396	4.227		-0.32087	0.378593	1.07231	0.144961	-0.838042	0.696347	-0.519853	0.249444	0.224294	0.432993	0.911498	1.17267	0.619396	0.776409	-1.26653	-0.794329	1.38549	-0.433649	0.830559	-0.426299
396	2.96971	2.55213	1.25785	1.63057	3.19006	1.77525	4.29009	4.55311	3.8994	4.12771	3.95279	2.53163	4.07725	3.43538	2.46827	3.38932	6.52315	6.3067	2.21584	4.7676	5.8828	4.86897	2.25126	2.13567	2.72079	5.18464	3.46164	5.14934		0.10601	0.0724756	2.03848	-1.02062	0.389483	0.493197	-0.717204	-0.587797	0.790192	1.30987	1.13227	1.27717	1.62576	1.54223	0.140583	0.142048	1.62567	0.452672	0.586574	0.212059
397	4.59429	3.26364	1.30124	0.418454	2.71399	2.73947	4.15992	4.86348	3.17202	3.89143	5.17739	2.98095	2.20028	3.77727	2.24629	3.07925	6.18057	5.63465	1.83863	4.87539	6.09584	4.99575	3.13036	1.51151	3.49229	3.85821	4.66776	2.21479		-0.286511	0.444664	1.22947	-1.09854	0.87733	-0.803221	0.676553	0.127448	-0.0339901	0.404065	0.335982	0.608421	-1.07335	1.38206	0.715364	-0.157805	0.797478	1.91728	0.731175	0.613052
398	3.02451	3.32941	2.88537	1.17419	1.02685	4.12814	4.10193	2.85681	2.84921	5.21285	4.99869	3.34119	2.75832	3.41606	1.02875	3.20066	6.24855	5.62864	2.01291	3.81489	4.62168	5.39008	3.27969	2.01176	2.65336	4.94494	4.19547	4.58498		0.513224	1.18782	0.292035	-0.685762	-0.225955	-1.43918	-0.455512	0.446561	-0.892724	0.723333	1.20632	0.876933	-0.92535	0.533887	0.491148	1.06077	1.20045	0.875486	0.525849	0.591895
399	3.5213	1.59726	0.96411	-0.0268323	2.07327	3.34909	3.46346	4.08132	3.9509	5.28626	3.51575	4.02932	2.62003	2.36039	1.55241	3.1998	4.97087	6.19138	2.06321	4.01474	5.25351	4.70227	3.44499	1.67866	2.52609	4.64773	3.6547	4.64217		0.625595	0.00536083	-1.4329	0.23124	0.534314	0.538937	0.11893	-0.712491	-0.112139	1.92376	0.644218	1.33123	-1.57957	1.08242	0.211149	0.29258	2.09107	0.511806	-1.12978	-0.370823
400	3.2287	2.54258	2.67971	3.50904	3.03605	3.15256	4.15902	3.81727	3.74734	5.31863	3.61581	2.57457	2.37354	2.24191	1.89131	3.6656	6.91418	4.69297	1.82977	4.59421	5.52443	5.45908	3.23588	2.643	2.02009	4.06104	4.35477	4.19429		0.165084	0.360899	0.982666	-0.681491	-1.261	-0.174218	0.862933	-1.41308	-0.490418	0.435383	-0.331203	1.04926	-0.870888	-0.211025	-0.576321	0.0696423	-0.46861	0.977919	0.36783	0.296557
401	3.96453	3.13954	1.92273	2.607	2.39647	2.45884	3.6829	3.63274	3.81113	5.10197	4.01846	2.42261	2.86758	3.5282	1.96224	3.22799	6.47203	5.46311	3.2131	4.08782	4.87052	5.35722	3.51583	3.3035	2.15888	5.19842	4.72931	4.10809		-0.686909	-1.21068	0.362533	-0.655272	0.252036	0.140753	0.982019	-0.886556	-0.621949	1.65354	0.644234	1.29117	-1.05834	0.301137	0.180316	1.05098	1.77668	1.28214	-0.331211	-0.541468
402	3.90742	1.90783	1.49115	2.84293	3.16667	3.69997	2.50521	5.28892	3.70915	4.09248	4.66241	2.60836	3.89033	2.2039	2.20074	2.3069	5.8442	6.46064	2.28901	4.69023	4.92926	5.47901	2.96952	2.084	2.60477	4.6038	4.8363	5.30092		0.265641	-0.342206	0.643033	0.415776	-0.0690086	0.840085	-0.184253	0.372394	-0.0625259	2.20308	0.537742	1.21354	-0.365979	1.23933	1.02434	0.177481	1.74194	1.0352	-0.871234	1.1024
403	3.4113	2.22627	2.11125	1.37131	3.1984	2.60884	4.27228	4.46607	3.43424	4.23038	3.86547	2.75121	2.80361	3.18569	2.50584	2.42779	6.17446	4.69627	2.11645	4.89073	5.47631	5.25296	2.80671	2.17858	2.06861	3.86699	3.87586	4.77364		-0.424189	-1.11583	0.781736	-0.116101	1.78163	0.317382	0.625378	-0.458037	-0.315484	1.16468	1.6336	1.1831	0.870384	0.248837	0.168766	-0.764341	0.138505	1.45871	-1.56611	-0.370175
404	4.38569	3.24496	1.33657	1.61928	1.79987	3.02957	3.562	4.7679	3.44911	4.48941	3.3266	2.76421	3.34476	2.91354	2.57875	2.26074	4.91742	7.02174	1.85941	5.29874	5.66178	6.85031	2.53983	1.7524	2.664	3.89764	4.83123	4.91868		0.0500851	-0.769766	1.18434	-1.90098	1.82143	-1.67486	0.193712	0.724071	1.06105	1.18961	1.09994	0.931409	0.474788	-0.368111	-0.149989	-0.697701	0.909152	-0.708135	-1.44475	0.231615
405	2.84218	3.00797	-0.852301	0.0548679	2.67672	3.05517	4.03061	4.15386	3.82681	5.82853	4.55066	3.29453	3.22512	2.54695	1.96825	3.39187	5.43757	6.05112	2.01473	4.25532	5.15794	5.85043	3.04209	2.57734	1.33051	4.58681	4.73433	4.05449		0.705342	-0.135907	0.954008	-0.649854	-0.0130875	-0.124143	0.484712	0.0316883	-0.176425	1.22606	1.13566	0.663325	0.217245	0.547074	-1.0029	0.884718	-0.160834	1.44945	0.977731	-0.182965
406	2.99384	3.16572	1.53702	2.34933	3.98826	3.02405	3.99983	3.94926	3.95686	3.96169	2.6726	2.8202	1.57629	2.9119	2.01497	3.76898	7.25033	6.73671	1.98772	5.01159	5.62828	5.69758	2.99124	1.87314	2.74968	5.29356	4.37232	5.5932		-0.844752	0.318317	-0.0160852	-0.263903	0.522949	0.256397	0.56748	-0.920664	-0.0310254	1.01538	0.408638	0.371471	0.133069	0.879573	-1.32866	0.178602	1.36261	1.34987	0.31794	-0.100106
407	3.84864	2.82838	1.83535	0.391542	1.67573	3.40512	4.04635	5.23139	2.66084	5.20579	3.62945	2.17964	2.79718	3.46737	2.25432	1.77935	5.69347	5.40341	2.46491	6.18622	4.63057	5.68715	3.68157	2.86578	1.8225	3.71001	4.78253	5.82763		-0.229234	0.0592042	0.441432	0.471484	1.51375	0.358864	-0.531922	0.289305	0.491233	0.879172	1.96993	1.68254	0.0180246	1.13024	-0.528957	-0.298885	-0.136155	-0.120504	-0.524859	-0.179102
408	3.74601	2.79854	0.944553	1.44597	1.67604	2.30971	3.96106	4.61202	4.23814	4.34125	4.89034	1.87468	3.02344	1.55703	0.96008	3.33274	6.473	4.6839	1.52228	5.68185	4.6989	7.17752	3.53886	2.90369	3.01776	4.27102	5.23871	4.34035		1.04715	-0.408153	0.250882	-0.284432	-1.48766	0.304628	0.581812	-0.377469	-1.23561	1.49921	0.939714	1.08623	2.05562	0.419994	0.771875	-0.204689	-0.429445	0.833668	-0.489769	-0.284928
409	2.48695	1.07543	1.31476	0.465232	2.59363	2.65731	3.29514	4.47448	3.43377	4.30399	4.26351	3.48271	2.93657	2.75171	1.91655	3.75217	6.20513	6.90631	2.6286	5.08527	5.86657	6.20352	3.78939	-0.104955	3.34628	5.11111	4.64771	4.31635		-0.361913	-0.300965	0.807838	-2.97961	0.816095	1.00783	-1.01535	0.788417	0.0159879	1.20861	0.855495	-0.0686678	0.430626	1.39643	0.159814	-1.12994	1.07841	0.838115	0.46479	-1.21389
410	3.22723	1.81738	2.09581	2.28922	1.22714	3.66434	4.55398	3.92417	2.60922	4.06638	3.78854	2.98815	3.09648	1.90532	2.46438	3.95385	6.14587	6.53332	2.49211	5.28844	5.49964	6.22088	4.34734	3.18551	2.228	4.55818	3.90591	5.19959		0.073982	-0.0255609	1.38749	-1.69597	1.48506	-0.948157	0.337037	-0.438663	-1.5975	0.704897	0.270821	0.128674	0.145254	1.5131	-0.562711	-0.367787	0.92532	0.643657	-0.93542	-0.0142297
411	3.9479	1.33416	3.22243	1.84055	1.20119	4.13896	3.3301	5.17433	3.54637	5.27824	4.70611	1.99346	2.44065	2.1919	1.76477	3.79973	6.42395	5.95395	2.14113	4.60322	4.52771	6.54287	3.44364	0.686177	2.45808	5.0094	5.7472	5.38527		-0.0528793	0.127992	0.757339	-0.504069	0.479562	0.465256	0.837933	-0.117914	0.352974	0.846686	2.88675	1.72819	0.839752	-0.547681	-0.420589	-0.0958015	-0.707125	1.11381	-0.475296	0.291938
412	3.5946	3.31894	0.908617	1.16338	1.41671	3.88472	4.14871	4.57895	2.98889	4.67396	4.49409	2.33981	1.25367	2.06307	2.36307	2.79238	5.14252	5.17345	2.40265	5.8815	5.28882	7.05031	3.81857	2.33059	2.57156	4.69835	5.75467	3.9432		-1.41008	0.898293	1.84026	-0.145644	0.609842	-1.91501	-0.474231	1.42344	-0.490242	2.07093	0.823092	0.627536	0.960536	1.45912	1.01432	-0.0307315	0.815389	1.30889	-0.441058	-0.450311
413	3.53406	2.44321	1.79457	1.52515	2.03417	2.80247	3.85643	3.87488	3.37057	4.43393	4.2466	2.75478	1.08101	2.24498	3.1612	3.70603	5.99837	5.10705	2.11646	5.51901	5.84823	6.02209	2.74007	2.99477	2.9735	4.13486	5.27707	5.36583		-0.333613	0.115832	0.556519	-1.36454	0.309693	0.702624	-0.0633806	0.164365	1.30194	1.2415	1.36143	0.611395	-0.40933	1.28702	-0.253259	-0.139068	1.48319	0.255488	-0.779346	0.161266
414	3.59417	3.34993	1.01633	1.29461	1.87538	4.61146	4.15509	5.13754	4.27302	4.58978	2.72235	0.898464	1.33237	2.56532	2.36312	3.65005	5.7246	5.5756	3.10577	5.21569	4.47628	6.38046	2.50412	1.79033	2.76472	4.38357	4.23493	5.11145		-0.433414	0.71342	0.520057	-1.01912	0.106589	-0.594742	-0.475259	-0.203817	-0.21539	1.05993	1.93144	0.408389	1.47808	0.0903558	-0.48698	-1.08322	-0.577085	0.215361	-0.279019	-1.43476
415	4.12403	1.81712	2.31995	0.266075	1.67918	3.30787	3.4033	5.23424	2.40104	4.66956	4.06601	0.92359	4.01597	2.99327	2.25791	2.97108	6.36707	6.06113	1.57105	5.52881	5.60983	4.70733	3.06037	1.96602	2.5404	3.82683	4.86624	5.19447		1.2953	-0.228638	0.656323	0.432152	0.830288	0.0759965	-0.0966256	-0.113551	0.598413	0.738436	0.860966	1.17333	0.654429	-0.353569	-0.714642	1.41604	1.0862	-0.47407	0.124255	0.79732
416	4.69883	2.41625	2.27122	1.15304	1.92138	3.11021	3.96812	4.21627	1.71072	3.2143	3.64524	1.95948	2.97233	2.19188	1.82001	2.71504	6.38231	5.03136	1.69647	5.95105	5.76185	6.476	1.62137	2.05662	4.47234	4.21725	3.47526	1.86581		0.710688	0.121798	-0.130103	-2.60663	-0.531379	0.482304	0.349034	0.477887	-0.275227	0.575634	0.711996	0.572622	-0.875198	0.242181	0.141248	0.401932	-0.37916	-0.346599	-0.954582	0.0316892
417	4.2321	2.58729	1.96629	-0.246793	2.47388	2.6681	5.4242	5.06698	1.47446	4.47034	4.10291	2.08804	2.20343	3.59506	0.583599	2.57113	5.90569	6.57733	1.42211	5.86405	5.38513	6.48411	1.50099	2.26696	2.25303	4.24097	5.4129	4.74714		1.60037	0.380526	0.84559	-1.07597	-1.10696	0.617896	-1.77028	0.33488	1.36635	1.05211	1.34576	0.688018	0.342465	1.12354	-0.826731	-0.349233	-0.549152	0.732339	-1.46398	-1.52191
418	4.65344	2.55684	1.13862	2.36883	1.6131	3.2796	3.73196	2.13581	3.31911	3.15625	3.73622	2.55618	2.62722	1.39639	1.36098	2.59121	5.71634	6.26728	2.1263	5.3808	6.22899	5.61596	2.76946	2.73052	2.4408	5.62913	4.2936	3.70407		1.62751	0.0970248	-0.946185	-2.20683	0.77826	0.872712	0.436894	0.0378463	-1.60664	1.15673	1.28748	-0.190659	0.554587	-2.8611	-0.0657236	0.0688439	1.30082	0.493578	-0.693143	0.621873
419	2.13231	1.177	2.38465	-0.708686	1.89935	2.6719	3.43224	5.13434	3.04886	4.27305	3.59694	2.34483	2.40401	2.84147	2.24904	3.09742	6.07529	6.77002	1.76361	6.33283	4.88465	4.5576	3.29559	1.9119	2.14813	3.43081	5.00464	4.40471		0.384454	0.61917	0.739127	-0.845944	0.497917	0.314013	0.494061	-0.0511622	0.352723	1.0335	0.367194	0.313691	-0.545032	0.711185	0.463203	0.780491	1.91552	0.903921	0.207791	-0.68183
420	3.78538	2.18262	1.30284	2.39544	1.98007	4.05391	3.62548	2.95124	3.02619	5.20779	3.63996	1.48983	2.63547	1.44045	1.88268	2.73965	6.77577	6.53966	1.02687	5.57359	5.99551	4.49823	3.18462	2.64936	1.36759	3.46156	4.64308	4.20318		0.474566	-0.0504679	-0.587248	1.27433	-2.09721	0.6001	-0.250597	-0.486693	-1.29155	1.19932	1.58403	0.390336	1.0609	-0.0354801	0.1219	-1.04624	0.75259	0.601498	0.425413	0.0803541
421	3.66587	2.76354	1.8008	-0.905545	2.98928	2.01224	4.42511	3.63185	3.15996	4.57502	3.27664	2.51584	2.22063	3.31148	2.57057	3.59178	6.33509	6.71458	0.85238	5.99437	5.40079	6.52576	3.40601	1.49639	3.7916	4.92642	5.03667	5.01653		1.073	0.223787	-0.0698943	-0.899802	-0.807333	-0.262697	1.12293	-1.09578	0.963455	0.379612	1.24522	1.28819	1.2707	0.832996	-1.07786	-0.897464	-0.872286	0.0831857	-0.121946	-0.454584
422	3.63835	2.10721	1.91666	0.560139	1.94182	4.1011	3.93108	4.18986	2.64503	4.05819	3.06635	2.0189	3.4352	3.25228	2.25413	3.98317	6.68959	4.93098	2.15756	5.20441	5.10914	6.01651	3.19877	2.07838	3.75786	4.48391	3.91175	4.02221		0.277053	-0.205335	-0.480941	-1.04203	0.614438	-0.00363056	-0.0605759	-0.946696	0.359426	1.43164	1.23503	1.51951	0.334043	0.97038	0.453933	-0.291958	1.89819	0.657838	-0.911919	0.0466287
423	3.00802	1.54293	1.19413	2.6888	1.95116	2.16642	3.73552	4.7156	3.61651	6.0227	3.44154	2.71328	1.59911	3.58572	1.47892	3.28883	6.96944	5.82164	0.596309	5.48679	5.90541	6.4523	3.55508	2.07757	1.36736	4.40862	4.00738	4.18657		-0.160912	-0.526622	0.571595	-0.59846	-0.0582626	-0.198122	0.750617	-1.1483	-0.119738	1.23137	1.42217	0.321712	-0.408596	0.522554	-1.07789	-1.25337	0.0247876	0.472007	0.079025	-1.11186
424	2.8716	0.863779	1.57341	0.729847	1.85861	3.03001	3.46769	3.32604	3.17993	5.2302	4.15663	1.87714	1.93803	3.079	1.8485	4.08566	6.67164	7.48862	2.64127	6.22419	4.53349	6.15265	3.05751	1.72195	3.16681	4.85104	5.14567	5.63931		0.262981	-0.634556	0.376774	-2.18439	-0.0515489	1.86724	0.62437	0.425183	-0.389572	0.203709	0.826968	0.963977	0.260949	0.742349	-0.528952	-0.59456	0.596953	1.15678	0.280881	-1.12521
425	4.12545	2.28065	1.87792	1.94351	2.8116	2.51285	3.10025	4.23662	3.16291	4.83059	3.93983	2.22582	2.10341	2.54567	2.18	3.05353	8.35273	5.3202	2.62912	6.13389	5.36464	5.40046	1.97798	1.46727	2.94498	4.54614	5.35899	5.5076		0.531706	1.28061	-0.970781	-0.526356	-0.551205	-0.140162	-0.168397	-0.365928	-0.715234	2.45562	2.5195	-0.513247	-1.08399	0.578304	-0.897145	-0.160177	-1.09148	0.335406	0.0066218	-1.28967
426	2.84607	1.8133	1.76237	2.0641	2.86165	3.75662	4.06648	3.75357	2.41568	4.19113	3.55444	3.08963	2.89192	1.98152	2.00375	3.01014	7.45734	5.83364	3.10609	5.51683	5.7695	6.44124	2.34181	0.772009	3.50307	4.86994	4.13633	4.23434		-0.368321	1.0502	-0.428277	0.0817128	-0.259238	0.994756	-1.4038	-0.684275	-0.554876	0.697795	1.54008	1.21781	0.583738	0.404858	-0.149058	-0.303992	0.93285	0.287223	0.502562	-0.191732
427	2.84856	3.19046	1.86075	1.6823	3.08067	2.75202	3.34124	4.64878	3.35758	6.30654	3.27741	2.11776	2.61899	2.48947	1.7041	2.52727	7.18087	6.58837	2.2856	4.4932	5.54902	7.01635	3.65021	1.96969	2.70109	4.37261	5.07178	5.12037		0.371981	1.21253	-0.56895	-0.703417	-0.613644	-1.25088	1.5129	-1.51695	0.838381	1.71881	-0.350521	0.676205	0.800899	0.245929	-0.209363	0.190452	-0.941155	1.34445	0.745902	-0.828416
428	3.7501	2.44151	3.26731	2.27163	2.95209	2.97468	4.5519	4.14782	1.81298	5.64208	2.27003	2.10733	2.3732	2.03825	2.75804	2.02375	7.02868	7.19209	2.49597	4.35064	5.82026	6.27384	2.17062	0.99175	1.63903	5.93129	4.46309	3.52321		-0.070641	-0.863802	0.853912	-0.560253	-0.521695	0.739693	0.483158	-0.723054	-0.990636	0.637074	0.651473	0.273419	0.0925795	0.43791	-1.50541	0.522052	-0.257547	0.546011	-0.389899	-0.60994
429	4.32554	2.38562	1.47103	0.970406	1.97673	3.53779	3.00203	4.41532	2.64956	5.68246	2.83031	2.32626	2.51742	2.23268	2.4809	3.92071	6.30752	6.17486	1.505	5.60056	6.68103	5.58813	2.29105	2.74987	3.62568	5.5059	3.90637	4.41242		-0.0526204	-0.54434	-0.240109	-0.524601	-0.588067	-0.280324	1.58479	0.190948	0.22103	0.929075	0.783796	0.100029	0.208144	-0.528934	-1.20483	-0.233411	1.15094	-0.176933	-0.810527	-0.415573
430	3.52796	0.871186	2.08945	3.20628	1.58168	4.14297	3.67123	3.86442	3.44475	3.49776	3.46832	1.69482	2.75834	2.7377	1.78693	3.15531	7.79512	7.45774	1.4752	5.58637	6.39348	5.98328	2.79071	2.08049	3.31797	4.44821	5.01651	5.55198		0.327715	0.688084	1.43794	-2.18345	-0.53731	0.706452	1.47172	0.656071	0.459851	1.19394	0.588257	-0.373942	0.39051	-0.841333	-1.38447	-1.3925	0.472495	0.121325	0.281715	0.0844282
431	2.9147	2.23157	2.19238	0.309064	2.9001	2.74242	4.47735	3.98033	3.21816	4.51624	2.43338	2.72012	3.118	2.41596	2.15896	3.28653	5.90896	5.85065	2.69951	5.23485	4.99612	6.12264	2.52253	2.5133	1.67501	3.32363	4.28017	4.36112		0.475484	0.622537	0.544325	-0.966151	-0.500622	-0.350413	0.692805	0.134068	1.40392	1.16998	1.71287	-0.640133	0.145211	0.763128	-1.20607	0.141578	1.12119	0.961375	-0.882121	-0.525538
432	1.697	1.6311	1.73474	0.727501	1.51295	2.9287	3.29506	5.25108	4.22605	5.93583	3.90716	2.60532	2.45951	2.95737	2.59498	2.96609	5.95442	6.10576	2.11531	5.69315	5.29944	4.5697	2.96517	2.65552	1.86024	4.57044	4.75855	2.98309		-0.204066	-0.902051	0.202246	0.0794592	-0.169966	-0.553417	-0.202117	0.588185	-0.947792	0.99497	0.902526	0.534876	1.18372	-0.177019	-0.924004	-0.904638	0.332665	0.289747	0.527708	0.639181
433	1.71121	2.15357	1.45055	2.79993	2.90314	2.5523	3.65534	5.0441	3.19489	4.70954	4.18193	3.08149	3.46055	1.72889	2.32241	3.30512	7.77457	6.53852	1.58941	6.42662	5.42987	5.37097	3.22168	1.97581	3.01985	5.04315	3.46019	4.73047		-0.0510684	1.24177	0.990999	-0.434311	0.151144	-1.10994	-0.0894724	0.185663	-2.54417	0.205189	0.951161	1.5112	0.37193	0.45376	-1.09656	-0.441368	-0.305947	0.371973	-0.683321	0.0221785
434	2.88408	2.73041	2.35173	0.756676	3.13407	2.83351	5.14246	3.29502	2.77135	4.14512	3.58021	2.79055	2.47334	2.23686	2.48009	3.55354	6.9714	6.51668	2.0458	5.12608	6.29952	5.25934	2.29416	2.29633	3.19596	4.8368	5.45762	4.99074		-0.536194	-0.769069	1.11939	-0.7178	1.04898	0.687691	-0.316742	0.23715	0.372818	1.15913	0.584619	0.671889	0.783377	-0.942341	-0.939107	-0.560197	0.665127	1.37583	-0.20245	-0.186422
435	4.56827	1.55744	1.54864	0.992192	2.94426	3.18806	3.13858	4.44353	1.8778	3.8291	2.65379	1.99104	3.0274	1.81263	1.88689	2.21416	7.55092	5.74386	0.846451	5.66924	6.93421	5.18536	2.54775	1.54599	3.56611	3.27291	5.03179	4.42255		-0.820456	1.53338	0.833807	-2.0026	0.572953	0.664201	0.846795	0.199338	-0.278868	1.95898	0.910041	1.78929	0.511567	0.187407	-0.58342	-0.25542	0.880993	-0.5008	-0.854859	-0.429367
436	2.48463	2.43186	2.64576	0.60582	2.12317	1.2665	4.10938	3.95477	1.76069	5.03441	2.15278	2.4534	3.27117	1.4893	1.87582	2.96051	6.99016	7.25773	1.03153	5.88219	5.71234	6.5033	2.77977	2.0575	3.61952	3.23052	4.48367	2.68028		-0.360241	0.265527	1.03424	-1.20054	0.982338	0.797586	0.657887	-0.863699	0.438373	1.45155	0.89348	1.47708	1.44648	1.74679	0.41283	1.13039	0.46729	-0.106126	-0.743595	-0.648363
437	3.53322	0.573147	0.315794	1.64233	3.25703	2.4889	2.84817	0.998714	2.88358	5.27219	3.13397	2.77765	1.99037	2.12386	2.6929	3.15943	8.15104	5.97861	1.09564	4.56808	5.36357	6.05747	2.09227	2.17537	3.70095	3.9682	2.35299	4.64237		0.351365	0.670156	-0.184156	-1.13024	-0.310671	-0.554603	-0.129644	-1.69864	-0.478828	0.658659	1.69262	-0.0686517	0.217276	0.754802	-0.94886	-0.329668	1.52513	-0.2066	-0.71467	0.908803
438	3.38855	2.34796	2.33465	1.23922	1.1874	4.76774	3.25565	4.10994	2.50827	6.02056	1.6989	2.36238	4.04923	2.72985	1.89204	3.00639	5.3763	6.62114	1.50255	5.59886	5.86927	6.51166	2.49207	1.69902	2.6018	5.08042	4.24517	4.54717		0.523497	1.21759	-0.81864	-1.41145	-0.640834	1.31878	0.0253972	-1.31619	1.04413	0.746486	1.91644	0.372263	0.495589	0.771455	-1.47406	0.324524	0.044472	0.40637	0.135772	0.0628059
439	4.23784	1.88023	0.969429	1.97414	1.46879	1.90681	3.53421	4.36193	2.72777	4.87023	4.21666	1.39869	2.65338	2.32831	2.51501	2.64417	6.90877	7.89304	2.15274	6.40419	5.12409	4.70504	2.20719	1.0552	1.15304	3.93888	6.0049	2.0089		0.846111	0.268371	0.0497255	-0.916689	0.18576	-0.735533	-0.522386	-0.181314	0.210075	1.40596	1.82876	1.04321	-0.428387	1.42963	-0.633428	-0.627162	1.29946	0.735462	-1.18161	0.319381
440	3.71434	1.48835	2.04896	-0.196608	2.45189	0.966353	2.88121	5.04858	3.47187	4.35462	3.22822	2.77656	2.98942	1.79967	1.21981	2.52587	6.51738	7.13435	2.54595	6.01414	5.47422	5.61113	1.73	1.73504	3.40258	5.34771	4.69602	4.08076		0.462365	-0.129718	0.537741	0.364517	0.126459	0.149082	-0.418835	-0.103946	0.539204	0.384665	0.673857	-0.369935	0.204847	0.00371028	0.795074	-0.0455135	1.91582	1.00724	-0.794306	0.545723
441	3.65275	2.33074	2.25567	2.00694	2.03452	2.85088	3.6668	4.65429	3.09422	3.91351	3.85984	1.72478	2.19761	2.88327	1.34809	2.96297	6.97198	6.87316	1.58955	5.57987	5.93361	6.79521	2.59649	2.36915	0.679778	4.74549	5.57035	4.8537		0.155542	0.192197	-0.0432329	0.869472	-1.68412	-0.637243	-0.151651	0.394173	0.191842	1.46437	0.810663	0.0508667	-0.921216	-2.68495	-1.04095	-0.458702	-0.718059	0.890318	-1.11909	-0.998504
442	3.36572	2.20731	1.19089	0.891016	1.27819	2.75026	2.66003	3.35732	4.27119	4.52458	3.51117	0.75488	0.67613	2.70751	2.34392	2.42213	6.71172	7.42323	2.86297	6.3754	5.87819	5.65862	2.58028	1.76049	2.75584	5.28526	5.75131	2.1467		1.06106	-0.529181	1.12836	-1.59415	1.29217	-0.603262	-0.144184	1.31416	-0.150318	0.889411	0.250922	0.975912	-0.873607	0.630007	0.0273205	0.219131	-0.0401461	-1.03654	-1.08311	-1.07059
443	3.23355	2.64164	1.24529	0.169066	2.69025	3.04392	3.47267	5.10439	2.45856	4.50223	4.2791	2.48443	3.12761	1.76982	2.94376	3.11172	6.64213	6.85565	1.81853	5.58288	5.47133	5.65416	2.21714	1.9896	2.82616	5.00569	5.30372	3.05209		-0.0490587	-0.989954	1.29381	-2.24378	-0.163135	0.0167145	-0.975951	0.451159	0.858545	0.758984	1.00911	0.79385	-0.411616	0.523045	0.127166	0.251914	0.528568	0.0433381	-0.899851	0.00812371
444	3.72965	1.79927	1.85887	4.01989	2.72216	2.67361	2.94203	4.76117	2.60184	4.52632	3.05822	2.18835	3.72927	2.6487	1.95406	2.99213	6.38765	5.56746	1.36192	6.51836	6.20725	4.50016	2.70873	1.49423	2.47154	4.16597	5.91905	2.88856		-0.501173	-0.842943	1.41762	-0.337821	-0.805462	0.15961	-0.529845	0.00885591	0.921554	0.706784	1.79959	-0.730865	0.589417	1.30359	-0.825423	-0.683535	1.41997	1.13303	-1.92896	-0.64673
445	3.34646	1.954	1.26816	1.02412	2.38427	4.37504	3.06205	4.57869	2.6447	5.64569	2.86117	2.68447	3.30708	2.13557	2.27712	2.82251	7.31055	6.89894	3.38737	5.98207	5.58639	6.35106	2.10364	1.28579	1.72422	4.37424	4.74869	4.64329		0.284193	-0.135838	1.17039	-1.96723	0.311613	0.612301	-0.016067	-1.02942	0.875332	0.39371	-0.46417	1.23837	1.91403	1.4234	-0.0253892	-0.136293	1.83629	-0.21929	-0.0659584	-0.0309566
446	4.45089	2.63945	1.24966	1.5631	3.59934	3.67288	3.73448	4.67887	2.53857	4.33008	4.03104	1.94925	1.48626	2.40937	2.82909	2.71874	5.5769	7.03761	1.73388	6.03026	6.24515	5.28772	2.94921	1.37863	3.04243	4.24504	4.3996	2.63469		0.132808	0.174074	1.5749	-0.801566	-0.0990431	-0.00176323	-0.458685	0.854235	-0.867401	1.6041	0.708022	0.462966	0.15561	1.55283	0.108512	-0.694147	0.886232	0.374727	-0.236258	-0.820833
447	3.85505	1.72177	2.51306	0.878249	2.571	2.40152	4.55531	5.10973	2.93547	4.51634	2.5383	1.95456	3.42412	2.41734	1.37312	3.0575	6.78243	5.41116	2.16304	5.25444	7.01518	5.76202	2.87609	2.39834	2.68849	4.08645	4.75882	2.33454		0.350692	1.01422	0.869701	-0.352627	-0.604717	-0.667132	-0.0667291	-1.15781	1.24993	0.0736585	0.687473	-0.139824	1.41682	1.00742	-1.72678	-0.291517	0.0934718	1.21153	-0.211808	0.00872926
448	3.45068	1.62204	1.73864	2.92472	2.98622	1.98428	2.88727	5.11307	2.31901	4.60982	3.68625	2.3942	3.83738	2.15057	1.89856	3.40106	6.46016	6.76748	2.47633	5.50731	5.60605	5.67968	1.84908	1.6328	2.72361	4.5118	5.50893	3.77892		0.367999	-0.370823	1.34116	0.126211	0.31751	0.249723	-0.17024	0.135395	0.35848	0.76161	1.12089	1.02371	-1.05088	-0.330478	-0.271615	0.119918	-0.108152	0.40136	-1.05991	0.184278
449	3.75252	2.93655	0.526545	0.869322	3.34692	2.55241	3.09094	4.33582	2.7802	4.50337	3.31928	2.92754	2.5661	1.84826	2.15794	2.62106	6.93321	7.15143	1.67175	6.18489	6.03755	5.77904	2.23172	1.49154	1.99562	4.47438	5.03733	5.83366		0.452722	0.665656	0.613671	-1.27504	-0.0265251	-0.523934	0.634343	-1.26536	0.271245	1.18933	1.4763	1.09792	0.240334	-0.0576105	-0.0737719	0.327202	0.797392	0.288009	-0.645099	-0.512451
450	4.59514	2.49928	-0.571831	1.70945	2.76527	4.01543	2.55704	4.29418	2.92174	5.29581	2.92229	2.78979	2.11481	2.42969	2.71549	3.32119	7.55266	7.34121	1.92019	4.7144	5.56679	5.5032	3.19292	2.18749	2.63557	4.02037	4.2423	4.9067		0.759064	-1.46886	0.870207	-0.801152	0.0267392	-1.62833	-0.118041	-0.424942	0.951406	1.66754	0.990896	1.04413	-0.14513	0.22576	-1.20082	1.04179	0.412407	1.0065	0.108136	-0.206999
451	3.49454	4.06447	1.69399	1.39438	3.07778	2.86543	3.41286	4.10546	2.36533	3.8815	3.12009	1.41719	3.19621	3.10329	2.99264	3.04559	7.02909	6.73814	2.2711	5.72736	5.8473	5.44896	2.17886	1.80863	3.18128	4.85294	5.36972	4.2698		0.103682	-0.724706	0.874458	-0.252134	-1.16837	-0.126653	0.131033	-0.50645	-0.148017	0.96816	1.17549	0.271386	-0.180781	0.513406	-0.328212	0.651326	1.00387	0.351808	-0.504241	0.682466
452	4.15419	2.29	0.547725	-1.07132	3.41215	3.00388	2.89327	2.92014	2.04829	4.46433	3.17906	1.63239	2.86015	2.90787	2.43161	1.92424	6.6912	3.60064	1.40508	6.00006	6.25528	5.0931	2.27963	1.72655	3.54727	4.37675	6.13004	4.00484		-0.0303328	-0.623869	1.71429	-0.511563	0.985817	1.09396	0.502839	-0.955183	0.360006	1.73653	0.382381	-0.0155135	-0.207277	-0.22878	-0.640916	-0.0227273	1.24759	0.413563	-1.11577	-0.161591
453	3.37956	1.75273	2.10941	0.779135	3.67583	3.12574	3.19873	3.7665	2.82455	3.95102	2.30737	2.29131	3.59067	2.94657	2.76439	2.48115	7.53483	6.90356	2.24722	6.09581	6.10682	5.02507	2.24341	1.49916	3.28487	4.27791	5.21979	5.53094		0.341315	-0.46907	1.52295	-1.35329	-0.688283	-1.43447	-0.223896	0.610091	-0.605249	0.543846	1.35302	0.71983	0.272364	0.562061	-1.29334	-0.0449089	1.13653	0.542844	1.49066	-0.497511
454	3.40464	3.94537	0.41201	2.50866	4.31293	3.88483	4.03636	4.38417	2.68282	3.49959	2.55732	2.01957	3.47399	3.18486	2.46709	2.12326	6.41403	7.29691	1.73404	5.59291	5.74868	4.89275	1.43216	2.38364	3.57091	4.5499	5.74743	2.08306		-1.30441	0.119555	-0.484244	-2.35597	0.543747	0.262772	0.872941	0.366432	-0.442168	0.92769	1.18687	-0.0730275	0.781764	0.0903576	-0.433567	-1.28413	1.80331	0.431317	-0.779602	0.519438
455	2.82611	3.02549	1.88546	1.36696	2.85599	1.78869	2.65512	4.31765	3.13181	5.88188	2.04024	1.84495	3.43005	2.93053	2.51599	3.07707	6.86503	7.6789	2.59523	5.98997	6.15527	5.86531	2.75194	0.968423	2.96434	4.10732	5.28311	4.66037		1.0418	0.184255	0.552154	-1.94509	0.210355	-0.496177	-0.20922	0.307439	1.23453	0.160848	1.21199	0.998114	0.141447	0.760007	0.351257	-0.573457	0.131861	0.657274	-0.227737	-0.524093
456	3.04585	1.83346	1.96712	0.780847	3.35441	2.57336	3.10155	4.69563	2.4985	5.62997	2.97792	2.25844	3.55581	1.10463	3.15656	2.77049	6.88896	6.39623	2.02176	5.88199	6.22528	5.67645	2.39966	1.68004	2.81588	2.58208	4.82702	5.15384		-0.412758	0.437273	0.160906	0.194203	-0.144138	-2.99464	-0.197048	-0.807979	0.746458	0.961247	0.755291	0.861775	0.438752	0.616678	-0.219104	-0.225987	-1.28558	0.0834099	-0.754871	-0.329119
457	2.62499	2.29738	1.16732	0.963032	2.66304	2.28044	3.47066	4.57788	1.77058	5.41594	2.69426	2.28819	2.64721	1.66369	3.19153	1.44649	6.92582	6.46307	2.34577	5.8564	6.09769	4.52534	1.38929	1.45455	2.5038	5.11309	4.8463	5.2253		0.865622	-1.46314	1.01668	-1.77939	0.338999	-0.419662	0.611401	-0.0686943	0.805658	1.39421	0.617829	1.34692	0.52615	0.149366	-0.569219	-0.244458	0.295914	0.608413	-0.798035	-0.0435772
458	3.365	2.67857	0.812119	1.11545	3.05314	3.43708	3.4947	4.77416	3.90245	4.19657	2.54352	2.82693	3.61741	2.93622	3.34889	2.35348	7.31578	7.85418	2.65249	5.23838	7.93126	5.90002	3.0246	1.73593	2.06074	5.62137	4.4676	5.00866		0.574543	0.776231	1.0431	-1.30687	-1.26926	-0.459594	0.966822	0.671088	0.522634	0.749963	0.924773	-0.792499	-0.00503499	0.185146	-0.128253	0.710281	0.02397	0.607207	-0.067469	-0.888851
459	3.86072	2.10947	1.61115	2.29711	2.76735	2.13222	3.50978	3.48991	2.96265	5.33282	2.49104	1.37576	3.72543	2.15035	2.80095	3.55034	6.84612	7.54057	2.869	5.65075	6.56205	6.0425	2.6797	2.43082	3.53379	4.91278	5.6963	5.00174		-0.198879	0.349708	2.24987	-0.315236	0.643246	-1.90713	-0.222856	0.0854884	0.682407	0.604321	1.15041	1.03299	-1.2443	0.822588	-0.959057	-0.64997	0.0700084	0.354459	-0.613168	-0.816481
460	2.44465	2.8131	3.14667	1.98857	2.77204	2.9741	2.8946	5.08322	3.11588	4.65771	3.04339	2.85751	2.06049	3.19538	3.05431	1.61777	6.64071	5.75146	3.08147	6.04571	7.10892	5.34148	1.12189	2.91979	2.8634	4.60816	6.34186	3.81819		-0.365338	0.143194	0.205345	-1.71172	0.615868	-0.0139366	-0.0939161	-0.260683	0.138678	0.672705	2.14802	0.718025	0.360782	0.685177	0.19377	0.78843	-0.276515	-0.448398	-0.450537	0.616197
461	2.67614	2.20553	2.23049	2.48279	3.12799	3.71076	2.53755	4.33668	3.45798	4.41639	2.80847	2.47751	3.40464	2.427	2.27743	1.7879	5.85352	7.27982	1.93029	5.86798	6.8226	4.85699	3.21446	2.4538	2.30596	4.61718	6.41192	4.7801		0.127426	-0.801967	-1.32606	-1.1568	0.263384	-1.64563	1.17406	-1.22398	1.08942	0.264494	-0.0526835	0.922722	0.937693	-0.18434	-0.46803	0.285147	-0.456297	1.5297	0.225687	-0.556544
462	2.88694	2.06013	1.02094	-0.0180216	4.75492	1.98195	3.8922	3.17118	3.09912	3.2069	2.6472	1.63276	3.53696	2.38202	2.21346	2.81112	7.48094	7.39424	2.01879	6.31047	6.52745	5.90999	2.73065	2.12704	1.90044	4.85162	5.25608	6.4674		0.10545	-0.218985	0.368237	-1.57446	-0.074199	0.713312	-0.246692	0.0840596	1.10497	1.31829	0.745179	-0.122456	0.583135	0.461226	-0.905669	-0.575712	0.309232	1.05106	0.0287381	-0.189959
463	2.87966	3.82408	1.8079	-1.62471	3.40427	2.5954	3.54646	3.75172	3.4805	4.40631	3.30457	2.68776	3.33366	1.49892	3.43532	3.72789	7.36775	7.05849	2.66081	6.82053	6.36936	6.57835	2.19708	2.08613	3.48995	3.50117	5.70836	5.81786		0.277662	-0.310168	0.8507	-2.08276	0.0865657	-0.211968	-1.19342	0.000927061	-0.0795507	-0.352858	0.53842	0.604101	-1.01513	0.145742	-0.930335	-0.102548	0.522086	-0.446624	-0.434192	0.0593223
464	3.10446	2.67283	2.2207	0.464118	2.17838	3.17821	2.82581	4.42542	3.09596	5.15201	2.73629	2.66438	3.77611	3.4905	2.88082	2.03653	7.01667	6.2262	1.96167	5.34083	6.5649	4.28549	2.61036	1.87972	3.1332	4.49699	3.96509	5.45811		-0.409064	-0.861679	0.37553	-1.00844	-0.501292	-0.0886543	1.22573	-1.71794	0.26243	1.6185	1.84584	0.671292	-0.598883	-0.543142	-0.936154	-0.0251169	-1.03527	-0.092901	-0.130273	0.628586
465	3.59485	2.12266	1.52319	1.64076	2.31482	4.22626	3.88425	2.41565	4.22311	3.76793	3.19804	2.26845	4.35027	2.5344	2.04091	2.17217	5.90963	5.66144	2.04209	5.6701	6.93408	5.57864	1.92856	0.774144	2.50196	4.36069	5.51003	4.51362		0.947854	-0.967922	0.818269	-1.13504	-0.69497	0.825917	0.22029	-0.0593769	1.22929	1.04312	0.669073	0.387902	0.0383331	0.433625	0.236058	-1.22569	-0.0506378	0.283719	-1.06302	-1.10322
466	2.55111	2.74951	1.61401	1.59725	3.6644	2.64308	3.39988	4.53778	3.11807	4.13238	2.9912	1.48522	3.372	1.23192	2.23052	3.55847	5.9691	6.37189	2.64148	5.86748	7.4176	5.42191	2.20235	2.02282	1.71786	4.63229	5.29143	4.96868		0.520563	-0.884983	-0.629277	-1.01326	-0.262258	0.567981	-0.176265	-0.886609	0.33983	1.05643	1.38188	0.320981	0.331917	-1.29344	0.143379	-0.22826	0.717697	0.274561	-0.184577	-0.274263
467	1.9331	1.66662	1.51936	2.30333	2.66575	3.08084	3.10855	4.48811	3.2954	5.17802	3.19625	1.89573	2.06323	2.25445	2.42319	3.18093	6.76937	6.71298	2.76934	5.12927	6.69101	5.91121	2.22043	0.735391	3.00133	3.46572	6.34418	5.37448		0.0980391	-0.923555	0.957157	-0.71053	-0.667978	-1.20335	1.17188	0.723041	0.404972	1.04943	1.16678	-0.19188	0.831623	0.367197	-0.0696596	-1.14557	0.563442	1.18401	-1.34783	0.69524
468	2.68059	2.22928	1.38461	1.96151	2.87694	3.3845	4.31416	4.9651	1.68171	5.79842	2.54114	1.3661	3.67081	2.92375	4.15799	2.13159	8.60383	6.24983	2.34654	6.13985	7.50802	6.36974	2.2905	1.25463	2.7088	4.63471	5.58932	5.48819		-0.19951	-1.56321	-0.0152523	-0.661295	-1.27119	-2.15638	-1.19671	-0.156036	0.945257	0.306844	1.3237	0.825332	0.69355	-0.422135	-0.0262731	-1.19611	0.519961	0.474911	-1.94179	-0.532753
469	3.377	2.92416	2.09811	-0.555667	2.92276	2.204	4.10359	5.13434	3.31631	4.87567	3.32449	2.30292	3.0835	2.55095	2.85513	3.01177	6.525	4.96472	2.9671	4.99602	6.88417	5.62717	1.69833	2.57514	2.40033	4.6309	5.05649	3.40254		-0.0663457	0.347116	0.930637	-1.85502	-0.519725	0.938883	0.497248	0.354769	-0.0850435	1.10947	0.453871	0.69402	0.797762	0.737985	-1.08132	0.409751	-0.751345	0.634828	1.14011	-0.410703
470	3.11678	2.17017	0.664388	3.95228	3.17941	3.80484	2.74486	3.68324	2.53522	5.29705	3.24529	1.90283	3.11887	-0.441629	2.82908	3.19247	8.6806	6.13226	2.45819	6.44904	6.63053	5.27358	1.63178	2.46629	2.63364	4.57854	4.566	6.36405		-0.0123926	-0.170571	0.981931	0.633486	0.619847	0.601387	-0.549258	0.303189	-0.55718	1.80288	1.72383	-1.36583	-0.369854	1.06124	-0.633292	-1.10653	0.345943	0.0564638	-0.166803	0.300693
471	2.35352	1.68751	2.7195	0.465285	2.67545	2.87162	2.51327	3.28063	2.89586	4.81324	3.07266	2.69493	2.47457	2.43725	2.37995	3.35408	7.25702	6.60983	2.42366	6.44471	7.31059	5.17054	2.06973	1.2747	1.04802	5.2053	3.91648	5.36942		-0.343432	0.472721	-1.59379	-2.34485	-0.225182	-0.0621461	0.41636	0.227059	0.00341395	-0.840163	0.54088	0.256253	0.571855	0.916362	0.110553	0.47941	0.0727297	0.157821	-0.880861	-0.626535
472	2.96374	2.31368	2.83565	1.90526	4.55299	4.11415	4.09227	4.64039	2.07309	4.18262	2.68449	1.21446	2.28057	2.6343	2.17543	3.28783	6.48845	6.8241	1.85119	6.27156	6.36849	7.19383	2.85408	2.26582	2.56962	5.12067	5.17147	6.49756		-0.516444	-0.614925	1.20907	-0.848923	1.04263	0.183618	-0.265772	-1.06348	2.37356	1.20838	1.75796	1.5776	0.0786791	0.510837	-0.0179008	0.345223	0.379038	0.114455	-1.08577	-0.443932
473	2.32904	1.00891	2.57929	1.25625	2.83051	2.86934	3.47477	3.8431	3.14571	4.01373	1.19301	1.70873	4.48702	2.18653	2.63586	1.77625	6.47039	6.14615	3.93963	4.95232	7.43928	5.83346	1.92224	1.40967	3.02553	4.6334	4.25834	4.35669		0.0964656	0.112271	1.26203	-1.58262	-0.2033	0.586009	-0.0658791	-0.970706	-0.965626	-0.0525416	0.376906	1.20059	-0.742395	-1.2735	-1.29723	-0.935969	0.991027	0.335625	-0.320219	0.127333
474	2.52865	2.82088	1.79867	1.79259	4.27738	2.84724	2.26516	5.09734	2.2632	4.48163	3.58508	1.31942	2.6738	0.740437	2.2854	3.3357	6.57863	6.69783	2.22251	6.44838	5.85029	5.19693	2.07176	1.71118	2.84312	5.05452	4.74517	3.71492		0.813464	-0.278749	0.0219391	-1.07071	-0.549658	-0.825385	0.228004	-0.341112	-0.670437	1.85188	0.957854	2.00734	0.689067	0.420504	-1.50879	-1.60803	0.752962	1.5679	-0.352206	0.140355
475	3.9779	3.18287	1.18188	1.72416	2.17577	3.12283	2.91224	5.07963	3.75037	4.70661	3.18649	1.24122	3.95824	1.41564	3.29054	2.86319	6.71167	7.15331	2.02564	5.31137	6.72123	3.98817	1.43079	1.92373	2.3891	4.78761	6.03707	5.4174		0.836141	-0.364786	0.707444	-0.137132	-0.735559	-0.258775	-0.988355	-0.866893	0.0166344	1.04669	1.13221	0.517114	-0.112473	-0.165467	-0.0386309	-1.79779	-0.944424	-0.364215	-0.335569	-0.541407
476	3.18497	3.43336	2.11424	0.00850594	3.55999	3.54379	3.99627	4.71578	2.83432	5.13305	1.93761	1.61576	2.90743	2.90857	2.86759	3.06467	5.96654	7.45135	2.64997	5.82884	7.20043	5.46926	0.859135	1.42177	2.41388	5.40403	6.17148	5.55986		0.183208	-0.374757	2.13451	1.25939	0.403701	1.00673	0.22013	-0.133217	0.43639	1.04515	0.416948	0.569464	0.427562	0.715977	0.0915631	-0.351744	-0.937186	0.796793	-2.13746	-1.87255
477	3.41614	2.12893	1.24316	0.553033	4.21929	2.41878	3.09136	4.13582	2.84428	5.33366	1.7133	1.58668	3.90501	2.64622	2.3661	2.92551	7.91557	7.58717	2.29598	5.91603	6.72711	3.93914	1.24285	1.42539	3.1672	5.26897	5.2393	4.93417		-1.26619	0.236349	0.922417	-2.17544	0.225832	0.181736	0.01626	-0.720896	-0.0768956	0.55597	1.82783	0.334044	0.90227	0.0668588	-0.0780834	-1.29592	1.89245	1.52442	-0.449318	-0.154588
478	3.75792	2.76981	0.681963	0.999381	2.54929	3.74407	2.84969	5.39628	2.26527	4.20068	2.88657	1.70824	3.60697	2.51923	2.34978	2.22658	6.9359	5.91265	2.40534	5.84135	6.06222	4.48984	1.5225	1.37337	1.40043	5.01691	4.40402	4.43728		0.267022	-0.16834	0.423266	-2.09401	-1.25591	-0.333136	0.442875	-0.178576	0.884402	0.787635	0.988337	1.17055	0.791786	-0.878422	0.000543985	-0.657991	-0.0965399	1.40511	0.403136	0.464409
479	3.52634	3.04178	1.03504	0.711177	3.77288	1.44135	2.71427	4.70346	2.73486	4.75838	1.64377	1.38147	2.37694	2.89499	2.74522	3.27319	7.03049	7.01413	2.15384	6.4434	7.30136	5.92523	2.00512	2.27277	1.51277	4.14911	5.27977	4.88647		0.807298	0.947364	0.996787	-1.36845	-0.56806	1.24333	0.486207	-1.70635	0.645538	1.43169	0.647876	-0.058331	0.273777	-0.162153	0.309108	1.02236	0.628674	0.483053	-0.784359	-0.446286
480	3.70625	3.3918	1.60133	0.933976	2.91219	2.81694	3.30043	3.59322	2.61966	4.06357	2.75115	1.29103	3.98873	2.87476	2.25634	2.25082	7.92975	6.41314	3.41216	6.34946	6.47304	5.02873	2.20236	2.51954	2.2025	5.26337	5.24952	5.65369		1.38168	0.584389	1.2934	-2.32342	1.01561	0.237933	-0.266623	0.0450982	0.396363	0.533736	1.15355	0.424	1.3047	-0.194001	-1.52732	-0.365385	-1.01976	0.403919	-2.40457	-0.563557
481	3.5044	3.04876	1.72891	1.5917	0.739286	3.39374	4.1947	3.48495	2.60571	3.51483	1.57722	1.16992	2.73611	1.58002	0.198461	3.22788	6.89922	7.17249	2.76188	5.94455	6.16864	5.17504	2.72053	2.27631	2.49636	4.67967	4.96644	4.88633		0.0787687	-0.800053	0.19817	-1.39158	-0.9493	0.243922	0.279715	-0.999608	-0.177529	-0.406572	1.20348	0.60422	-0.0051965	0.300172	-0.651112	0.427954	-0.0779406	0.696296	-0.0514213	-0.0183539
482	3.57913	3.51915	1.71638	1.22672	2.49925	3.05166	3.44578	3.62498	3.80359	5.00023	1.38373	0.976491	3.29037	2.29904	2.91392	2.16884	8.07093	8.17004	2.78741	6.03198	6.05218	5.85566	2.23494	1.70081	3.22805	5.29758	5.83111	4.27564		0.231098	0.0193536	1.04085	-1.17357	-0.355517	-0.497375	-0.338996	0.77836	0.513983	0.260822	1.11085	0.223746	0.701159	0.320134	0.489287	-0.423646	-0.897009	-0.377007	-0.623963	-0.501208
483	2.71953	2.24975	2.26249	2.8741	3.57765	3.00862	3.34881	3.16555	2.49659	4.06676	3.15374	1.23659	3.39393	2.10538	2.66426	3.05498	8.20407	6.42757	2.2304	5.12662	6.52044	4.55957	2.24137	1.32931	3.51404	3.95545	5.64238	4.42269		0.224883	0.567511	1.54994	-1.19915	-1.36015	0.707894	2.10616	0.302207	0.875915	0.986657	2.31059	-0.72758	0.216367	0.298175	-0.745547	0.80766	0.992173	0.273762	-0.167015	-0.269335
484	3.04306	1.73648	2.53711	1.04369	3.36034	3.31467	3.15782	4.16744	1.88202	4.73266	2.08566	1.58469	4.71897	1.04657	3.29755	3.09336	7.65017	7.35854	3.81262	5.75486	6.53149	5.26788	2.71297	2.59899	1.23128	4.53563	5.8667	5.14908		-0.542132	1.13351	0.828185	-1.05321	1.16505	1.18845	0.570374	0.729821	1.13883	0.866219	0.0383246	0.471906	-0.451583	0.192696	-1.33963	1.2213	0.75424	0.710711	-1.13232	0.0419889
485	2.37881	2.72833	2.57546	1.33728	3.81308	2.12852	3.88405	4.40184	2.69611	4.59211	2.37863	1.80289	3.26472	3.02657	2.81636	2.29194	6.88414	5.63842	2.78829	5.75678	6.19429	4.12054	2.86384	-0.0495225	1.32893	4.88606	5.38795	5.75338		-0.775575	1.00961	0.241916	-1.35473	1.9402	-1.39324	-0.570412	-1.00284	0.135433	0.576409	1.44372	-0.130501	0.681783	0.405508	0.0289471	-0.901271	-0.311469	0.44276	-0.281835	0.376099
486	4.11197	3.79988	1.98345	1.99118	2.74469	3.38346	3.18866	4.80132	3.47828	4.17273	3.02017	2.52227	3.31133	1.73947	1.75	2.7963	7.51307	6.59357	2.95456	6.02932	6.04223	5.54071	2.38008	2.45181	2.64668	5.13845	5.91194	3.71046		0.549966	0.762872	0.764066	-1.21071	-0.392679	1.40337	1.17205	-0.170472	0.546484	0.46533	0.864002	-0.263882	-0.468454	-0.0825901	-0.645723	-0.382247	0.0839145	-0.54016	-0.937877	0.692046
487	3.87433	2.94015	2.25646	2.38456	2.82234	2.77875	2.77953	4.50812	2.62281	4.2591	1.41068	0.750789	4.2841	1.28034	2.08782	2.67871	7.28721	6.79337	2.82656	6.79927	6.94993	5.2791	2.1728	0.968157	1.91273	3.54379	5.08797	4.58457		0.692641	-0.914089	0.684957	-2.09377	-0.606722	0.804031	0.422328	-0.0318539	-0.295497	0.837531	0.684405	0.31318	0.222886	-0.498077	0.540138	-0.320706	0.00653884	1.19707	0.07819	0.256127
488	3.80574	2.73027	1.19308	0.467977	3.90603	3.37051	3.5521	4.09296	2.99252	5.37304	1.6783	1.51939	3.58749	1.64328	3.53594	3.95329	7.55305	7.23808	3.14379	7.24976	7.08222	5.27605	2.128	1.39115	2.8088	3.4597	5.08528	4.61176		-1.81728	-0.140772	0.173767	-1.38836	0.251882	0.133778	1.21586	-0.232096	-0.270166	0.308633	0.140043	0.334504	-0.566022	0.299974	-0.414227	-0.693089	0.505766	0.735785	-0.238466	-0.0444006
489	3.60528	2.97236	1.96735	1.09675	3.00324	2.37992	3.89807	3.87684	3.40017	3.37273	3.38924	1.00504	3.08576	2.39523	2.34445	2.3737	8.79793	6.39144	2.56231	6.33695	6.90103	4.77209	1.53231	1.82407	3.13639	3.06011	5.29475	4.65202		0.191203	0.737079	1.47874	-1.15248	-0.449767	1.53379	0.167017	-0.751522	0.105515	1.43789	0.901854	0.51941	0.815237	0.230373	-0.456325	-0.7425	1.7065	-0.0117736	-0.116245	1.00892
490	2.82583	2.20867	2.5436	1.71165	4.43076	2.6467	3.73638	3.34148	2.90502	5.25001	1.85898	1.48223	3.6632	1.76637	2.79643	3.02513	8.64666	7.0584	2.72265	6.32234	5.72251	3.41656	1.6633	2.55331	2.50856	4.41683	6.2996	4.55365		-2.57824	-0.49798	0.335663	-1.58638	-0.413315	-0.13725	0.473908	-0.0562826	0.0924464	1.0649	0.402294	0.424728	-1.42987	-0.25706	-1.14758	0.552875	0.672617	0.603566	0.253114	0.345319
491	2.3918	2.64588	1.95834	2.28506	3.47184	4.21285	2.43714	4.52254	2.45654	4.64469	2.84134	1.19787	2.82398	2.79795	2.66095	3.56741	6.78176	6.591	3.73312	5.65237	4.909	4.5998	2.74199	1.92652	3.13059	4.6	6.09722	4.26195		-1.18697	0.613308	1.47297	-1.63584	0.0463305	-0.126449	-0.280847	-0.674325	0.747781	1.83484	0.532362	0.674812	0.377329	-0.968666	-1.00258	-0.454283	-0.549368	-0.233929	0.270013	-0.113633
492	2.10375	2.7609	1.81537	2.07743	2.61523	4.07334	3.57032	2.56608	2.69986	4.03363	2.56376	0.711506	3.65823	2.60758	2.00987	3.36889	8.44033	6.75685	2.69743	5.50435	6.97965	4.7598	1.90069	1.11939	3.07087	4.24705	5.84859	3.97273		-1.71885	-0.337973	0.797708	-0.964683	0.0745222	0.312564	1.45513	1.05819	1.88324	-0.856785	1.19396	-1.09134	0.400596	-0.65836	-0.848199	-0.709078	0.611308	0.787456	-1.21694	0.549918
493	2.4315	2.45887	0.92261	1.30368	3.5786	3.21698	3.13341	4.53368	2.55559	3.84569	3.03211	0.355363	3.69019	1.91993	3.03745	2.84049	6.82623	7.93369	2.8698	6.46983	6.76841	4.85191	2.45014	2.13749	2.14694	3.36907	4.82412	5.2324		-0.159879	0.541518	1.90609	-0.245501	0.0227306	0.947493	1.01171	-0.140816	0.288983	0.745619	1.03387	0.471236	-0.297353	0.394295	-0.636028	-0.392298	1.17286	-0.0373673	0.220462	0.00490615
494	2.31842	2.28846	0.678093	1.19281	3.26333	2.37061	1.96084	4.10512	2.45939	4.71059	2.41216	1.46721	3.0386	1.98155	2.92934	2.64136	8.16516	6.66019	2.86562	6.71595	6.72452	4.86043	1.63638	1.87503	3.04763	4.41197	5.72614	4.81485		0.179181	-0.319595	2.6231	-1.92261	-1.64958	0.517772	-0.609467	-0.615101	0.210166	0.651987	0.727415	-0.100298	0.0619559	0.551594	-0.468848	0.149741	0.257744	-0.0961638	-1.64268	0.523157
495	3.05633	1.89175	0.711647	3.0838	3.19663	4.10608	2.75788	3.32438	3.86151	3.58095	1.7624	0.401358	4.0151	2.00725	2.8837	2.80879	7.35853	7.02266	4.03474	6.9979	5.54756	4.16223	3.35094	1.91076	2.25417	5.04905	5.34101	4.32893		-0.120764	0.860679	0.861049	-1.08738	-1.0079	0.0904263	0.667883	0.328841	-0.561393	0.63426	1.3199	1.06945	0.573784	0.684764	-0.619307	0.0231295	0.478958	0.394489	-2.00751	-1.11476
496	2.46439	1.70389	0.501187	0.976722	4.23455	4.82356	2.36041	3.55463	3.68287	4.74753	2.0591	1.24587	4.09624	2.63726	2.51532	3.92222	8.32393	6.65343	3.66635	6.05794	7.34989	3.68206	2.78331	1.01294	1.89569	3.68175	4.5428	3.0955		0.831375	0.113726	0.599984	-1.89437	-0.368551	-0.777175	-0.94342	-0.502604	-0.0580969	1.68932	-0.308231	1.7512	-0.365481	0.659909	-1.50074	-0.714318	-0.224957	0.191513	0.560139	-0.796551
497	3.10511	1.83991	0.648701	2.47556	3.65998	2.04486	2.67045	5.00087	2.30986	4.44797	2.65466	1.44395	4.10471	1.64347	0.911804	3.03292	8.58435	5.69492	4.65299	6.10053	6.58798	5.49103	1.45398	2.36053	3.28611	4.3823	5.46638	4.01376		-0.327719	-0.188016	1.82359	-0.674191	-0.580876	0.289257	0.656777	0.138493	0.0904359	0.579278	1.06085	-0.471115	0.345608	-0.173377	-0.870214	-0.92489	-0.0817171	0.0799181	-1.42847	0.0448245
498	2.08842	2.58374	1.64697	1.69411	4.2328	3.98796	3.01826	3.79649	2.96558	4.54713	3.39875	1.04606	2.54144	2.912	1.74415	3.08304	7.30646	6.47771	4.13901	6.812	6.86036	5.18889	2.3195	2.83931	2.60202	3.56816	5.46738	4.68308		-1.1887	0.154564	1.01604	0.525566	0.737384	-0.453887	-0.420378	-0.613981	-0.527908	0.45948	0.502699	0.962428	-0.584997	-1.35174	-1.0418	-0.0547087	0.308289	0.346637	-1.31468	0.676078
499	3.50538	3.15782	1.06699	2.05517	3.37921	2.78903	2.2179	3.68022	2.11331	4.44021	2.48881	0.312011	3.61262	2.58057	2.48302	3.2905	8.34011	7.9511	4.04649	7.07748	6.31268	4.39471	2.55642	1.82217	3.36419	5.51957	4.17273	5.52862		-1.60387	0.707497	0.453105	-0.990788	0.154806	-0.526919	1.06748	0.133439	0.664633	1.08799	1.75478	0.0251651	0.559551	-0.484836	-1.64198	-0.194837	0.556169	0.141886	-0.427027	-1.02341
500	3.24915	2.12216	1.11963	-0.066708	1.87809	3.68865	3.45102	3.87351	3.57602	4.99422	1.61383	1.66603	3.66187	1.88899	3.10089	3.49146	6.88101	7.26137	4.11186	5.82561	7.69391	4.27724	1.94116	2.22052	1.58686	4.38297	4.8444	4.60839		NaN	0.377732	1.68265	-1.92143	0.179172	0.846175	0.239715	-0.325764	0.0502551	-0.184224	0.869781	0.151653	0.163003	0.0634158	-1.72186	0.627716	0.716396	0.686886	-0.137798	-0.331531
501	2.03903	2.19571	0.965054	1.77153	3.39099	3.05098	3.2449	3.13173	3.41356	2.91522	0.0433452	1.19766	3.26086	1.87099	1.92714	1.14344	6.81143	7.66093	3.7911	6.003	7.22827	5.58923	2.7385	1.79981	1.99342	4.31073	5.58872	4.92131		0.907021	-0.0763082	-0.728403	-2.27644	0.62398	-1.65925	0.384715	0.379266	0.151385	1.28721	1.70615	0.830777	-0.868144	-0.592562	0.00223217	-0.246519	0.541014	1.02354	0.0152165	-0.79728
502	2.12093	1.65114	1.46158	0.395824	3.189	2.7304	2.52096	3.91322	2.76789	3.92113	3.20314	1.67218	2.60418	2.85491	2.92216	3.04225	8.03958	7.23472	3.98349	6.18352	6.1762	5.7712	1.60571	1.10045	1.99059	3.82668	5.88547	3.70572		0.106476	-0.0779949	-0.864791	-0.838668	-1.48005	-0.95932	0.794504	-0.532944	-0.892093	1.04671	0.836484	-0.697418	0.117279	0.00847454	-0.198975	0.0417505	0.473046	0.735415	0.156684	-1.15044
503	2.96017	2.11559	1.22563	1.93625	2.53383	3.34347	3.07909	3.42757	3.76975	3.88407	2.22621	0.862412	3.46507	1.81173	3.30652	3.04788	7.92071	6.67253	3.61539	6.40251	6.34567	3.64162	2.15639	0.999949	0.861435	4.08344	5.76695	5.1586		0.130978	-1.55876	-0.325847	-1.04152	-0.955044	-1.20684	0.272436	0.287627	-0.536818	0.159614	0.287164	-0.0230999	0.0939739	0.203959	-1.0218	-0.307602	1.34538	0.477929	0.490164	-1.22621
504	2.61938	2.06752	0.484422	1.57446	3.64412	3.9565	2.8208	3.8617	2.5568	3.75181	1.5137	0.985941	2.48218	2.50475	2.45615	1.67517	7.10763	7.51633	4.37575	5.58104	7.2293	6.04454	2.12551	0.872675	2.05498	5.90736	5.34793	4.38716		0.0871278	-0.679883	0.305015	0.474127	1.83515	-0.578623	0.391015	0.089446	-1.36503	0.796748	0.93297	0.466284	0.73948	-0.678387	-0.637951	-0.195818	0.36464	0.459468	0.385217	-0.0214922
505	3.32318	4.12649	1.81347	1.61381	3.88885	1.97728	2.74278	3.87284	2.05008	4.53808	2.6928	1.24907	3.25888	2.07995	2.64059	2.93808	7.48245	7.79277	4.51633	6.82987	6.68394	4.69321	2.37938	0.274288	1.44737	4.02011	5.47415	5.2533		1.00852	0.0426606	-1.31404	-2.17131	-1.18419	-0.252775	0.796932	-0.0802954	-0.868489	0.0919982	-0.713719	-0.161925	0.273623	-0.0629459	-0.743547	-1.05994	0.286491	0.141049	0.265556	-0.421335
506	3.36537	1.60604	1.52488	1.64651	2.306	3.36722	4.6155	3.9993	3.52589	3.6596	0.507383	1.0744	3.36506	2.74061	2.57112	3.35099	7.53879	7.7531	4.28371	6.58227	5.78776	5.25543	3.31811	2.20969	3.50245	4.10844	5.38131	5.29433		1.13638	-1.01386	-0.965594	-0.575291	0.446552	0.462271	0.517291	-0.703367	1.21677	0.0460503	1.08693	-0.209856	1.11915	-0.0525067	0.066052	-0.346212	1.33951	0.912787	-0.598266	-0.268495
507	2.41153	1.38873	1.37455	2.40656	3.24858	2.99254	3.81007	4.30675	2.86137	3.44676	2.61751	1.28331	2.36619	2.25097	2.10579	3.30044	8.91107	6.59362	4.28941	5.74552	6.54688	4.24474	2.96784	-0.56295	1.89475	4.38439	4.87992	4.22377		0.101281	0.29072	0.0703474	-0.734486	0.122898	0.210253	0.605831	0.165993	0.54315	1.23613	1.76271	1.07414	0.283053	-0.517247	-1.43551	-0.00704451	0.567909	0.441499	-0.933209	0.0832902
508	2.62315	2.6635	-0.574561	-0.0932172	3.91914	3.12407	4.33	3.51544	3.22697	4.10017	1.12934	0.205117	2.18332	2.54787	2.49384	3.76487	6.69905	7.44007	4.62048	5.67882	6.79857	4.35841	2.57054	1.68227	3.10404	4.79306	4.71095	3.87988		1.10407	-0.173752	1.14622	-1.19518	1.09189	0.0830098	-0.811631	-1.03697	0.455915	0.849622	1.0113	0.613367	-0.601528	-0.551176	-1.77194	-0.901546	0.464992	-0.238361	-0.814891	0.158771
509	1.56547	1.73069	0.147501	2.26923	3.50621	2.31394	2.51854	2.8138	2.45509	4.79774	2.43609	1.34393	2.67235	1.86149	2.27691	3.18761	8.14473	7.39752	4.19918	5.64688	6.76557	4.53964	3.05248	1.40643	1.12844	4.30047	4.99609	2.96049		0.616826	0.660638	1.43487	-2.24496	-0.143546	-0.849697	0.69395	-0.00799099	-1.43375	-0.148804	0.997631	-0.229175	0.847973	0.205565	-0.317273	-0.145833	1.11877	0.206407	0.107582	-0.576971
510	2.57431	3.59264	2.38533	1.21796	3.66572	4.07231	3.3517	3.31741	3.03104	3.52191	2.1999	1.42448	3.38787	2.77011	3.14072	2.43251	7.15367	6.60142	5.72958	6.7429	7.22561	5.36191	2.37619	1.3524	2.92972	4.42278	4.8717	5.11154		-0.348409	0.495889	-0.418832	-1.71888	0.934596	-0.450398	0.500802	-0.32823	1.23387	1.313	1.95745	-0.0212942	1.46896	-0.473725	-1.25918	-0.191683	1.21549	0.312865	-1.19853	-0.749066
511	2.30699	2.39343	1.29255	2.29066	4.2355	2.83994	3.63959	3.88612	2.58558	3.4864	2.88322	1.65261	3.60847	2.86734	2.9538	3.19303	8.24115	6.56544	4.47343	6.36813	7.0174	3.35869	1.92158	1.77289	2.98913	4.44248	5.84457	3.47635		0.359753	0.5474	0.624528	-1.71962	0.402894	-0.169721	-1.95111	0.841926	0.203499	0.347305	1.02591	-0.069019	-0.513636	0.918779	-0.39655	-0.0799051	0.733393	-0.508301	-0.141583	-0.605235
512	3.31245	2.78298	-0.00614656	3.19137	3.19749	2.80447	3.69952	3.76412	3.06196	4.22018	2.87323	0.454621	2.72237	2.19763	1.7678	2.71306	6.66845	6.04017	4.66682	6.15173	5.80997	3.34689	1.34515	1.32665	3.01704	4.01371	5.2786	4.82533		-1.21006	0.365417	2.43583	-2.23508	-0.865885	-0.889939	-0.563705	0.0141402	-0.0219088	-0.16343	0.615724	-0.886306	-0.872092	-0.502298	0.232782	NaN	-0.411817	0.856431	-0.861629	-1.61341
513	3.09667	3.23928	0.119432	3.3739	2.49681	3.50783	2.71308	3.03959	2.84697	3.89047	2.50487	-0.0267932	4.17345	1.73718	3.27367	3.34263	7.16175	5.92272	4.69691	6.5407	4.9419	3.4087	3.01546	0.79301	1.9681	4.15894	4.68452	2.49422		-0.548508	-0.403866	1.16329	-0.874215	-0.523552	-0.766909	-0.035097	-0.266971	0.538613	0.864215	0.947294	1.02067	-0.310342	0.189042	0.23663	0.198775	1.3794	0.365003	-2.01303	0.023172
514	2.06877	2.2234	0.540191	1.71215	2.72692	2.94128	4.18825	3.14736	2.59976	4.15469	2.16383	1.26659	1.42593	2.20956	2.40601	2.72661	7.34319	7.82226	4.76605	5.70922	5.85619	4.66248	1.74559	2.17258	1.97785	3.02488	5.08954	5.86159		-0.388955	-0.284285	1.10126	-0.577401	-1.04897	-1.28	0.428957	-0.0631568	1.24795	-0.264369	1.40551	-0.51611	-0.547011	1.62637	-0.730328	-0.747477	0.577155	0.166408	-1.47916	-0.0247104
515	3.2789	2.4076	0.476167	2.74204	2.03383	2.82211	2.98202	4.60484	2.95347	3.93687	1.9227	0.323242	2.56328	1.97499	0.795944	2.35832	7.76554	6.31696	4.97494	6.11407	5.74269	4.56932	1.80579	1.9306	2.41701	4.58089	4.69237	3.98062		-0.214001	0.419704	-0.33837	-1.78304	-0.436351	-1.03743	-1.77242	1.42356	0.112572	0.239876	1.25323	0.648624	0.0400612	0.510601	-0.220432	-0.0289072	0.72196	0.711633	-0.784686	-1.07031
516	3.18472	2.55074	1.54152	3.1565	3.2784	4.29947	3.93512	3.39951	3.27614	3.64675	2.94361	0.654412	2.43956	1.85611	2.82304	2.92958	7.69319	6.95367	4.91103	6.77188	7.38711	2.72125	2.70754	1.50853	2.32662	4.04442	5.39833	4.15098		0.150249	-0.354377	-0.164642	-2.15034	0.152401	0.0287384	1.27271	0.868327	1.27379	1.18628	0.82716	0.548248	0.195004	0.884686	0.19947	-1.08958	1.05773	0.629865	0.248086	-0.713644
517	2.15348	3.67978	1.22844	1.77172	2.7792	3.66654	2.91242	4.26384	2.63351	4.23644	2.52027	0.840982	2.45922	2.08927	2.17196	2.61598	7.25376	6.904	5.57187	5.7741	6.20001	4.01651	2.25843	2.34197	1.90742	2.26875	6.13539	5.36141		-0.0291669	0.296282	0.913223	-1.13736	-0.650376	-0.596578	-0.027161	-0.689764	-2.59515	0.606821	1.06491	0.61553	-2.14161	1.86209	-1.36013	-0.315679	0.913307	0.65766	-0.547788	-0.29602
518	1.73195	2.49591	1.05452	3.1951	2.55917	3.29225	2.71067	4.01693	3.6102	3.79521	3.00312	0.263057	2.23789	2.24439	0.770279	1.97667	8.1623	8.11134	3.25507	4.78071	7.19848	3.99007	1.98044	2.11416	2.15207	2.04955	4.77958	4.34807		0.467069	0.414934	1.96932	-1.86432	0.0330112	-1.7839	0.183177	0.702666	-0.443454	-0.246316	0.866034	-0.0523626	0.0581199	0.224668	-1.73156	0.411003	1.60294	0.134807	-0.62984	-0.100275
519	2.42628	1.8652	1.12514	2.47588	2.83296	3.09235	1.02292	3.57137	3.24953	4.05299	2.17211	1.74644	3.44297	2.07758	2.73232	2.29629	5.80902	7.01206	4.3841	6.09829	7.99404	4.81593	2.44449	1.24115	2.3572	3.62274	5.00026	5.00575		1.10396	0.256689	0.266584	-0.855013	-2.24542	0.44507	-0.130798	-0.271815	0.581115	0.868551	0.727082	0.471255	-0.415917	1.65515	-1.25982	-0.141936	0.702947	0.0667069	-0.633264	-1.05122
520	2.93228	2.649	2.01188	1.01365	3.78255	3.4327	2.02121	2.8805	3.17169	4.74497	2.64517	1.51205	3.61034	2.08145	1.65884	2.58482	7.12795	7.49166	4.23538	6.46387	6.0592	4.07387	1.53452	1.90693	2.4924	4.87484	4.7413	3.98659		-0.494626	0.0973616	1.89703	-1.16266	-1.2016	0.103866	1.28905	-0.652333	-0.325087	0.15159	1.49021	0.119633	-0.839749	-0.0420249	-1.12557	-0.531101	-0.207294	1.10546	-1.83829	0.681503
521	1.83756	3.01579	1.49693	2.58485	1.78869	3.43775	1.92988	3.75754	4.06385	3.66261	2.07155	1.66532	2.94442	2.26615	2.0947	3.53781	7.93726	7.0282	5.23333	6.86039	5.83438	5.36245	1.77241	1.43354	1.73226	3.01883	4.58147	3.89679		-0.174254	-1.20036	2.46076	-0.949626	-1.58838	1.08659	1.03185	-0.432422	-0.244083	-0.756727	1.03906	-1.15142	0.110147	0.22682	-0.112156	-0.0969704	1.18204	-0.377998	-0.0867003	0.269048
522	2.84241	2.13625	1.25854	2.27838	3.69347	2.79835	3.25061	4.34429	2.72997	3.79845	2.032	0.00235346	3.6776	3.07211	3.39432	3.04302	7.73605	6.28152	4.93575	6.11301	7.10307	4.7368	1.79474	0.204991	2.66681	4.27485	5.34902	4.82193		1.03529	0.588477	0.449577	-1.78688	0.844276	-0.557336	1.08721	1.11401	0.417193	0.468454	1.18086	-0.499861	0.247166	-0.26993	-0.94416	-0.443859	0.732172	0.73497	-0.346104	-0.968072
523	2.89587	2.76049	0.382216	1.54287	3.15499	2.77262	3.44567	5.08351	4.19039	4.28649	1.86101	1.92896	2.91205	2.42893	2.38847	2.2039	7.08554	8.00466	4.44175	5.70542	6.6363	4.45248	2.43466	1.52531	2.19239	4.46758	2.25996	4.63701		-1.22043	0.25846	0.289208	-0.982522	-0.736103	-1.574	0.543717	0.233441	-1.26199	0.531021	1.95906	0.169147	0.123312	0.411484	-0.786563	-0.63994	0.315599	0.915434	-1.53925	-1.55133
524	3.62339	1.94853	0.15079	3.57306	3.0235	3.02687	2.70542	4.07202	3.74495	3.83272	2.931	0.872891	2.42467	1.94699	2.85689	2.93121	7.26843	6.89736	4.80268	5.43387	5.88015	3.93531	1.05792	2.00837	2.55709	2.83868	5.44036	4.80437		-0.49917	0.485287	2.15617	-1.47506	0.878184	0.247342	0.397948	0.101781	1.30036	0.177158	0.766495	0.321812	-0.366513	-0.22197	0.137585	-0.00562396	2.25235	0.856979	-0.645035	0.267713
525	2.84669	1.13229	0.89994	2.99073	3.35388	3.79228	2.61433	4.96457	2.70502	5.49724	3.0532	1.26298	2.91644	1.97878	1.57432	2.22662	6.98136	6.91774	4.2045	6.54484	6.55425	3.21842	2.7757	0.705045	2.2976	3.51194	4.70965	4.74048		-0.0945824	0.235844	0.691523	-1.0178	-0.353012	0.252507	-0.0833631	0.306585	0.84091	1.19666	0.499524	0.562077	-0.011832	1.31677	-1.21486	-0.804293	-0.262076	0.916074	-0.307849	0.102081
526	2.8175	3.02045	0.836707	3.21664	3.87042	3.25918	3.30309	3.67562	2.88561	5.4225	1.04096	1.21715	2.47199	2.28396	2.49032	2.27807	6.49357	6.17807	4.61135	4.06472	6.96635	4.23265	2.45022	2.91543	2.08114	4.04204	5.19663	3.88858		-1.23216	0.234357	0.480928	-2.30471	-0.228969	-0.803204	-0.0901524	-0.275236	0.389544	0.316362	1.57237	-0.985136	0.492221	-0.00170155	-0.154976	-0.0798578	0.424036	0.121071	-2.36127	-0.257105
527	2.23432	3.04476	-0.0266942	1.52069	3.71378	2.76294	2.89338	4.62777	3.46173	3.80736	1.62458	1.51369	2.30909	1.97127	3.07917	2.69655	6.46516	7.49606	4.41389	5.62673	5.43431	3.7975	2.52306	1.00459	2.68572	4.53689	4.22184	4.63066		0.265353	-0.068536	1.12596	-1.09918	-0.0876427	-0.515249	-1.69446	0.777824	0.194676	0.898453	-0.143821	-1.4064	-0.279494	-1.07037	-1.11885	0.135508	-0.290056	1.01549	0.809689	-0.120893
528	3.06355	1.24013	1.47855	0.904479	3.60746	3.18114	2.57734	3.12765	3.67919	3.88404	-0.0834528	1.96447	3.87459	2.21585	2.5887	2.50551	7.56346	7.60945	5.0006	6.24398	6.38576	5.19252	2.01313	2.36701	1.46465	4.81604	4.97255	4.41203		1.25794	-0.401322	0.25466	-1.08264	0.179753	1.25223	0.327393	-0.974226	1.02555	0.726688	1.99666	0.834403	0.153387	-0.0399795	-0.0810794	-1.50362	1.27306	0.55395	-0.915599	0.787297
529	3.32071	3.12009	0.878965	1.99259	1.75961	2.80573	2.63534	3.55917	3.62382	3.9877	2.60606	1.22751	3.11613	2.25798	2.51272	3.14844	7.09394	8.38533	5.91764	4.76007	6.49798	4.84937	1.98997	1.33599	3.33005	4.03225	4.61109	4.18736		1.14841	-1.02472	0.477233	-0.324709	0.093119	0.19457	1.29724	0.377458	-0.0703037	-0.690284	0.805261	-0.107037	1.1275	-1.39358	-0.315998	0.16846	0.94379	1.31403	-0.619909	-0.668504
530	2.93161	2.57117	0.977192	2.59883	2.9056	3.9644	2.45594	4.54268	3.12674	5.10608	2.38823	2.46267	3.27171	1.39659	1.73399	3.27589	7.69989	7.58941	4.63504	4.9975	6.32442	2.54116	2.52183	1.56158	1.82683	4.84579	5.59575	4.95577		-0.313247	0.452291	1.0302	-1.23845	-0.00785938	-0.925259	0.103231	0.678812	1.02176	0.40556	0.774713	0.166516	0.481488	-1.83832	-0.886105	0.0529662	1.82367	0.981034	-1.21313	-0.0500796
531	3.63295	2.51688	0.534621	3.95238	3.65749	2.65778	2.44801	3.77971	3.45553	3.91796	3.35862	0.78133	3.22058	2.46931	3.23037	3.2779	7.43006	8.43148	4.66263	6.22294	6.85666	5.19422	1.78692	2.40386	2.72782	3.96346	5.28672	2.37533		0.861691	0.616306	0.672782	-2.16696	-0.463769	-0.273487	-0.528989	-0.635668	-0.388004	1.07962	0.997196	0.6773	0.449367	-0.643562	-1.84697	-0.200812	1.39373	1.05093	-0.592033	0.655958
532	3.03171	2.07497	-0.542257	2.10233	2.7915	1.31377	4.06656	4.14672	3.80263	4.12835	2.48007	1.0314	3.24119	0.809544	1.89143	3.16178	7.26114	8.16555	4.29896	4.98	7.13261	5.5812	1.92095	-0.117813	2.28677	4.4512	5.2835	4.75208		0.108523	-0.0377739	1.40743	-0.742139	0.44885	0.0144893	-0.389326	-0.86598	-0.8069	1.56265	0.944905	-0.421692	0.210121	0.816822	-0.375296	-0.0458003	0.930421	1.17701	-0.130206	0.0879691
533	3.03652	2.05339	1.65886	2.58192	4.20832	3.46189	3.82396	3.8903	2.81839	3.44342	1.94035	1.36998	3.25026	2.01638	2.90039	2.76602	6.28504	8.00228	4.45807	5.51298	5.7083	4.59706	2.29753	1.17996	3.53541	3.77911	4.66819	5.94436		-0.352323	-0.299469	1.82586	-1.32139	1.72667	0.541968	0.798527	0.404161	0.505164	-0.011133	1.33274	-0.207157	0.565468	0.220391	-1.36202	0.637998	1.3894	0.0172642	-0.936105	-0.908028
534	2.681	1.93792	1.58455	0.4419	2.69842	3.73268	4.48151	4.16419	3.12931	4.00967	1.88389	0.825646	4.14073	1.79434	3.02951	2.77805	5.89438	7.16203	5.02685	5.43964	6.20502	4.23	2.03229	0.783965	1.68701	3.8503	5.43737	3.38271		-0.345128	-0.570018	1.10517	-1.17602	0.354575	0.0992145	0.0225985	0.326861	0.211492	0.425878	-0.889706	-0.150524	0.160275	-0.667472	-0.609797	-1.72491	0.991271	-0.00244931	-0.97561	0.206048
535	3.23261	1.74315	1.39026	2.63434	4.54095	3.34286	2.71859	4.13843	2.93197	4.72224	1.28713	2.96008	1.98505	1.31547	1.66338	3.2366	8.09172	6.58567	4.55657	5.81218	6.20281	5.65415	1.95363	1.4409	2.26492	3.79917	5.95562	3.7644		0.243	-0.22823	0.294567	-0.963601	-1.08856	-0.489403	0.0311094	-1.21444	0.213121	0.915938	1.21385	-0.3546	-1.14389	0.302802	-1.51825	0.165833	0.701482	0.83194	0.741669	-0.128688
536	2.66115	3.29956	0.369218	1.49395	3.31754	4.14342	3.58754	3.98049	3.34662	4.99915	3.08612	1.20973	2.43745	1.35404	2.42532	2.53126	7.42638	7.70288	5.05614	5.39756	5.78196	3.18923	2.23627	0.195292	2.41913	4.87707	4.82411	4.6661		0.746322	-0.83999	1.01815	-1.82649	-0.389684	-0.0444345	-0.48863	-0.0656426	1.50927	0.75685	0.712269	0.147623	0.676434	-0.997746	-1.90835	-0.910475	1.13717	0.880977	-0.34626	-0.388051
537	3.12801	3.42418	0.286507	0.421469	2.49584	3.9528	2.8336	2.9915	3.74944	4.87215	2.55786	1.27379	2.82441	2.47008	2.742	2.51569	6.62449	6.41692	5.0414	5.9494	6.13489	4.28276	1.07605	2.52207	2.87057	4.58645	4.40039	5.97633		0.471676	-0.217452	0.732139	0.149292	-1.37034	-0.276804	0.37412	0.569405	-0.926237	-0.118883	0.772541	0.659132	0.0416505	1.16908	-0.453451	0.112239	0.692362	1.61779	-0.585887	-0.187082
538	2.74216	2.9179	1.89483	1.88959	2.50231	2.19561	2.93748	3.47115	2.96825	5.04114	2.59378	2.5599	2.33173	1.52952	2.52757	3.14858	8.3266	7.76323	4.22994	5.0103	6.07647	4.95115	1.2523	0.686173	2.81413	4.45016	5.91668	5.75644		-1.22353	-0.805726	0.560508	-0.332224	-1.93835	-1.44146	1.22635	0.323705	-0.284034	1.40076	0.514675	0.693404	-0.0193853	0.616306	-0.195501	-0.146377	2.03418	0.695616	-0.819508	-0.0476891
539	3.48308	1.62441	2.00439	2.48015	3.74108	2.75713	2.60919	3.713	2.61682	4.39232	1.65412	1.30161	2.69774	1.34085	2.07845	3.29829	7.05492	7.19027	5.7896	5.12553	5.53002	3.78201	1.99681	1.05553	2.76421	3.5495	4.99096	4.024		-0.18975	0.325688	0.843871	-2.52133	0.355609	-0.66292	0.534555	0.487414	0.448458	-0.29433	-1.37438	0.309618	-0.240011	-1.2372	-2.52348	-0.125076	0.174826	0.0280225	-1.3341	0.327082
540	2.33715	3.16221	0.306707	1.92182	2.96615	0.0902559	2.94486	4.94351	2.6484	5.44481	3.2407	1.79452	1.1269	1.94776	3.01278	3.38214	8.4297	7.57748	5.28397	5.76855	5.48192	3.46835	2.5352	1.1399	2.68083	2.07319	4.71864	4.49612		-0.965883	0.689902	0.100544	-1.38551	-0.893157	0.610431	-0.363811	0.511556	-0.441895	-0.117875	0.620407	-0.372491	0.277744	-0.373048	-0.678152	-0.339546	1.4347	1.40455	-0.395865	0.420025
541	2.02401	2.84385	1.20768	0.595074	3.96029	2.9684	1.67983	4.74972	3.64745	4.60821	1.38238	1.95459	3.35608	1.20507	1.41106	1.42671	7.39864	8.07578	5.49305	4.85775	6.36138	4.34323	2.14886	1.74206	1.33061	4.86678	4.24857	5.5986		0.424416	0.0860026	1.67395	0.0972576	-0.69551	0.422613	0.395957	-0.37484	0.721939	0.788496	0.835995	-0.0274648	0.0574513	0.241354	-1.05671	-1.11186	0.635685	0.753238	-1.23059	-0.591186
542	1.85579	2.09275	1.54371	2.26762	2.78815	2.47925	3.31994	3.91932	3.96928	4.83168	2.43422	1.22311	2.12704	2.47965	2.74521	3.62862	7.32862	7.27464	5.91352	3.93671	5.88061	4.5769	2.11023	1.59345	4.01792	4.78726	5.94658	4.30474		-0.777146	1.03236	1.40998	-1.10918	-0.790972	-0.599879	0.294521	0.336129	0.377529	-0.0332998	1.49639	0.358959	1.29896	-0.249981	-1.05787	0.390248	2.31177	0.720586	-1.87125	-0.00978756
543	2.90107	2.04316	0.878101	1.83169	2.35913	2.67667	4.21563	3.56782	4.14067	4.34801	2.6734	3.02806	2.2074	1.7052	2.8369	2.8483	5.92572	8.06582	5.61129	5.7034	6.2243	4.95067	2.36063	1.45731	3.33304	3.52546	4.87046	5.48029		0.523614	0.0569149	-0.166117	-1.14086	0.222628	-0.607102	0.159745	0.122778	0.49805	1.51943	0.679884	-0.623221	0.637657	0.171116	-0.714188	-0.315176	0.689462	0.653215	-0.405441	-0.884499
544	3.41512	3.15566	1.90163	0.772067	1.53438	2.4256	3.37648	4.17117	2.07741	3.95927	2.74316	2.03305	2.8751	2.47236	2.56865	4.11088	6.45404	9.5967	6.49475	5.74372	6.7758	4.03287	1.51358	0.763652	3.33779	3.3421	4.15076	4.29022		-0.289935	-0.0021184	1.33827	-2.07371	0.239713	0.397735	-0.152522	-1.29746	0.191578	0.629531	1.18277	-0.0951282	-0.0746112	-0.591415	-0.245533	0.115014	-0.645347	-0.0488907	-0.357551	-0.488315
545	2.83336	1.46989	0.772617	2.09592	3.33259	2.85663	3.52615	3.6679	3.58476	4.00042	2.54772	2.85489	2.87909	0.828422	2.26745	3.49688	7.23371	7.4242	4.43825	6.48796	5.67326	5.76814	2.02578	1.59003	2.98191	2.39163	4.96188	4.88346		-1.63233	0.522441	0.777617	-1.71452	-0.584463	-0.404428	0.632841	-0.413395	0.396472	1.07641	1.0291	0.403297	0.0878562	-1.43787	-0.027741	-0.415858	0.400077	0.2275	0.148573	-0.0949082
546	2.53938	2.33439	1.56336	0.0610166	2.93968	3.41667	4.56288	4.19355	2.8419	5.56335	3.90151	2.47875	1.63866	2.69521	2.5767	3.34582	7.51267	7.4308	4.09941	5.18855	6.48954	4.18815	1.55305	0.752454	2.15022	4.64671	4.70757	4.99051		0.263385	-0.986859	0.262552	-0.2734	-0.789901	-1.37203	-0.312625	1.19568	0.260072	1.35048	1.49987	-0.584774	0.8487	0.784713	-1.47958	0.410513	0.75914	0.427533	-1.63909	0.77657
547	2.54947	3.04657	1.1812	2.14862	2.4895	3.13259	4.47682	2.77855	3.22568	4.83663	3.22686	2.90379	3.42637	1.96341	2.8	2.39854	5.97344	8.03975	5.60452	6.20434	5.69907	4.08359	2.88801	3.01288	2.69342	3.97733	3.98491	3.88095		0.876768	-0.046222	-0.25316	-1.36523	0.0634354	-1.15871	0.631408	0.757492	0.406206	0.388471	0.755048	0.131513	-0.541707	-0.945318	-0.758915	-1.05036	0.781739	-0.440709	-0.00534523	0.0556825
548	2.79027	3.49782	2.56961	2.07442	2.42507	2.97846	3.54089	2.87677	3.32346	5.04663	2.27605	2.58564	2.15823	2.08435	2.68482	2.75769	5.18805	8.69573	5.24078	4.78765	6.35718	4.6797	2.47763	0.60414	2.42018	3.79147	2.74626	4.58076		-0.289572	0.294023	1.30891	-0.943954	-0.438665	-1.27695	-0.617359	1.0138	-0.329502	0.228499	0.436926	0.371413	1.32671	0.165414	-0.659875	1.09273	0.372564	0.758242	-1.0001	0.17407
549	2.63077	2.28824	1.81571	2.27877	2.39617	1.76626	3.62006	3.81525	3.13476	5.27578	3.10143	2.15118	2.61856	2.08073	3.26601	2.44439	8.60611	7.18749	5.36011	4.40352	5.81601	3.50048	2.19429	1.48478	1.63415	4.39513	4.09588	3.32792		1.05847	0.423221	0.608991	-1.28692	-1.14027	1.60994	0.526879	-0.178548	0.888815	0.485287	0.859003	0.405633	0.339029	1.53807	-0.217552	0.0929598	0.694221	0.697639	-1.1828	0.339272
550	2.96618	2.26428	1.74054	2.62191	2.62426	3.27924	3.88921	4.82633	3.38855	5.68934	2.00073	1.61151	1.84686	3.10782	2.37086	3.29071	7.38248	7.63618	5.87973	5.40442	6.23364	4.27487	1.76001	1.51482	2.86652	4.5193	3.9236	4.63324		-0.967024	1.31824	1.58415	-1.47337	0.637807	0.386051	-0.424359	0.583169	-0.356399	1.0245	0.248128	0.132931	0.597105	0.620788	-1.44909	-0.710155	0.794828	1.22679	-1.11555	-1.06152
551	2.25417	1.65564	1.23645	0.551142	2.74108	2.03401	2.93593	3.65986	3.27756	2.78062	1.97066	2.0655	2.09403	3.12127	2.68263	3.43187	7.38571	8.2746	6.28909	4.33855	5.45678	4.94358	2.72526	0.762189	2.41103	4.01157	4.39811	5.43443		-1.30421	0.0432398	0.148937	0.202187	-0.895283	-0.400537	0.981243	-0.151148	0.83165	0.0115316	1.34511	-0.496814	0.54297	0.704881	-0.356244	-0.519078	1.00989	0.956564	-1.18311	-0.0565398
552	2.95552	2.42677	1.25561	2.97256	2.70503	2.92075	2.25525	4.03329	2.78572	5.53457	2.00086	1.88047	3.26705	2.31557	2.29916	1.60789	5.54839	7.84863	5.19107	4.0956	5.45389	3.6108	1.93593	0.503201	-0.286152	1.94883	5.59231	3.64378		0.416341	-0.628297	0.899812	-1.37749	0.325682	-0.0656554	1.72395	-0.406247	0.172547	-0.47079	0.641237	0.599932	-0.309129	0.493638	-0.393005	0.245852	-0.997033	-0.283685	-1.50003	-1.04922
553	2.63674	0.913965	1.68844	1.35337	1.88846	1.30174	3.99822	3.23431	3.58364	4.89995	2.06024	0.986755	1.78752	2.55495	2.51175	2.87171	7.29638	6.01025	5.15284	4.30702	6.39367	4.88047	2.97572	0.3567	2.53191	3.29847	4.73298	5.22057		-1.16093	-0.101329	-0.258877	-0.374371	-0.524242	-0.310483	-0.728398	0.0901851	-0.239575	-0.0303976	1.75866	-0.38097	0.358409	0.180473	-1.44318	0.598403	-0.328184	0.572768	-1.35249	0.848852
554	2.42291	2.14513	1.657	1.50688	3.2736	3.89603	3.54712	3.64603	1.76215	5.46424	2.44336	2.17063	3.64023	2.61119	2.3708	3.31597	7.2241	4.59685	5.81427	2.92735	5.85398	3.9366	2.83752	0.974345	2.13442	4.82969	4.26959	5.1132		0.204382	-1.00408	0.177214	-0.104318	-0.188562	-0.71558	0.171786	0.0482718	0.212411	0.573494	1.55242	0.0657009	-0.178834	0.0180707	-1.41129	-0.868929	0.814179	1.08653	-2.27127	1.0434
555	1.88828	3.40972	1.35042	0.779044	1.58864	3.6612	3.19048	4.4643	3.23048	4.75759	1.52688	2.5022	2.50499	2.73597	2.87164	2.27461	7.20779	6.64651	4.27244	5.46302	6.20688	3.94075	2.13027	1.19882	2.16643	3.84432	4.63547	3.89698		-0.411286	-0.173989	0.372201	-0.440346	0.0478848	0.293496	0.35978	0.879008	0.855571	0.531282	1.17758	0.255456	0.92326	-0.311031	-0.586405	-0.29509	0.848885	0.160883	-0.959847	0.653509
556	4.13097	1.72195	0.329958	3.0005	2.66185	2.35218	4.64588	3.82489	3.85676	5.91253	1.29664	1.8934	2.33922	1.97542	2.45439	3.22232	6.33612	8.18281	5.13989	5.51723	6.2723	4.49489	2.40031	1.37583	2.04901	2.91934	5.69945	5.67601		-0.178316	0.168439	0.98406	-0.960806	-0.436361	0.300957	0.449411	-0.799324	0.181704	-0.0922252	0.946755	0.184056	0.584919	-1.25744	-0.751218	-0.24308	0.551842	-0.432668	-1.98275	1.06574
557	3.48257	3.2321	2.29598	1.05942	3.93057	2.22023	3.14111	3.48766	1.8296	3.79097	1.62949	3.61183	1.03396	1.74032	2.73802	3.11756	6.81772	6.76292	5.1622	4.78683	6.12784	4.70096	1.73607	2.35976	3.03546	4.35532	2.18127	4.72675		0.375898	0.42963	1.17451	-1.19552	-1.15448	1.27403	1.32555	-0.49685	-0.527884	1.0399	1.08289	-0.608288	1.61773	-0.389707	-0.0724856	-0.726406	0.631615	0.806479	-0.677383	0.0878535
558	2.99589	0.82143	1.10781	2.00984	3.66983	2.1301	3.87239	3.97005	3.49959	5.46673	2.58678	2.47657	1.97308	3.06793	1.91915	2.93867	6.20704	6.74089	4.42951	4.62709	6.3171	3.97528	2.68792	0.555564	2.87015	4.43834	4.62246	4.33055		-0.245509	-0.121875	0.670544	-1.08454	-0.78832	0.809516	0.811781	-0.0490811	0.782509	0.581658	1.55085	-0.554425	0.44242	0.393664	-0.307209	-0.729366	-0.0976651	0.706831	-0.785744	0.218993
559	2.9667	1.9705	0.861752	2.02286	3.61206	3.79447	3.21412	3.50832	3.56882	4.63317	1.57719	1.74768	2.82468	1.92016	2.92392	2.96006	6.85944	6.83407	5.06025	3.70522	6.67773	5.08111	2.64732	0.972462	2.19996	1.49457	5.1715	4.48879		-0.0302504	-0.344341	0.621181	-0.768723	-0.351607	0.438364	0.732393	0.100611	-0.859522	-0.175585	0.769236	0.0624781	-0.417872	0.225177	-2.4019	0.363311	0.98495	0.243945	-0.450052	-0.77336
560	2.85371	1.31007	-0.122506	0.864039	2.80334	0.376611	2.59645	3.76149	3.59074	4.67839	2.01026	2.43759	2.0917	2.32203	2.44047	2.76552	7.92124	6.17552	6.04473	5.35137	5.24185	3.70561	2.89916	0.72597	1.68965	3.77064	5.33594	4.45203		0.373922	0.495009	2.16767	-1.42425	0.0164048	0.468232	0.757627	0.144833	-0.0712601	0.49663	0.380937	0.174456	0.236502	-1.53632	-0.646432	-1.33709	-0.0191364	1.76376	-0.653585	-1.02898
561	2.49466	1.13093	1.11647	-0.248589	3.09317	2.50092	2.63788	4.27157	3.83658	3.5584	2.44409	2.5819	2.42428	2.26755	2.48319	3.25347	6.28195	8.46263	5.20293	5.10612	6.22073	3.78273	2.24637	0.390398	3.25038	3.67152	5.09584	4.61391		0.819305	-0.246939	1.4053	-1.21359	-0.299821	1.84511	0.886482	1.55976	0.675637	0.0121076	0.82232	0.717424	-0.935427	-0.0923657	-0.546485	0.326977	0.0377144	1.03793	-0.623393	0.173293
562	3.37756	1.84217	1.60124	2.8527	2.36325	3.89793	4.07252	3.91348	3.43492	3.79682	1.19388	2.82574	2.58423	2.95799	3.02536	3.7455	8.89316	7.54728	4.91545	5.09636	6.02255	3.20864	2.14662	0.717104	2.87786	4.34894	4.84081	3.46875		-0.0814623	-0.2037	0.490198	-0.729439	0.0165357	0.813408	-0.428437	-0.721106	0.187724	0.043877	0.75088	0.714332	-0.182567	-0.0710648	-0.923877	-1.89598	0.484362	0.859939	0.160138	-0.589688
563	3.34887	2.80404	0.620292	2.7937	2.766	2.68353	3.10555	3.96781	3.14665	4.86664	1.68811	2.77224	2.39617	2.21437	2.67872	4.23437	6.41579	7.09982	6.0023	5.58928	6.66232	4.1041	3.36652	1.85277	1.83443	3.27802	4.76684	4.0324		0.158245	0.0200115	1.22746	-1.72033	-0.574367	0.422195	-0.848385	-0.336511	-0.70963	0.877788	0.666949	0.881488	-0.0951071	0.188556	-0.758668	0.848008	0.444791	0.871855	-0.350557	-0.0265797
564	1.7493	2.24536	1.42158	1.04344	3.18007	3.1369	3.63906	4.59111	4.13781	3.30629	1.65382	2.72018	2.45959	2.74356	1.28107	3.4239	6.57395	6.23337	5.86012	4.51399	5.3965	4.65854	2.17882	0.960448	2.5693	4.10434	4.98577	4.25958		0.623375	-0.527528	1.84871	-2.23618	0.5498	0.266934	0.910851	-0.397403	-0.264385	0.731838	0.500521	0.830085	-1.07512	0.414036	0.14052	-0.669566	0.359491	0.664574	-1.2153	-0.724224
565	3.32982	2.38169	1.2929	1.85515	5.42212	1.71869	3.07243	1.98157	3.04477	4.50401	1.41176	2.81508	1.96046	2.47673	2.55821	3.06911	6.93079	7.73378	5.47906	4.63316	6.31077	5.09527	2.22069	1.03433	2.04046	3.88766	2.04998	4.84921		-0.528102	-0.360903	1.18695	-2.08155	-2.80101	1.65724	0.919796	-1.13877	0.0680981	1.18121	1.61392	-0.572968	-0.309669	0.303356	0.00612683	-0.548424	-0.669966	-0.210665	-1.69626	-0.432137
566	2.82892	3.25862	0.00424642	-0.107542	3.24297	2.62579	2.66836	3.46455	3.16233	4.27197	2.58644	1.58933	3.33306	2.96202	2.60221	3.1329	7.67373	7.63344	4.3998	5.38817	6.08887	3.09598	1.9422	0.628759	2.2509	4.85307	3.86548	5.89951		0.799623	-0.862484	0.219143	0.145202	-0.389775	-0.0265277	0.493745	-0.548287	-0.12179	0.386293	1.09944	-0.297638	0.181303	-0.947154	-1.78775	-0.510557	0.998357	0.101093	-0.12562	-0.294517
567	1.97454	2.37163	1.11352	-0.504051	2.67879	1.96945	4.11783	3.58271	3.52481	4.88017	1.55353	0.753146	3.41827	2.80696	2.88555	3.33879	6.55337	7.06189	5.03586	4.30383	6.03975	5.11667	2.62297	1.13905	3.36007	3.07183	5.54687	3.80507		0.422622	-0.908537	1.75074	-0.451198	-0.77723	0.00257617	-0.510226	-0.0327767	0.21852	0.26411	0.674821	-0.64926	-0.175277	-0.281615	0.0230329	0.849295	1.08344	0.145959	-1.66956	0.207974
568	2.83416	2.14453	2.04948	1.85193	3.52602	1.24812	3.37583	3.63347	3.76983	5.19151	2.90842	1.2549	1.84394	2.48047	2.65657	4.20792	6.04791	7.69206	5.24351	4.82276	6.38722	4.21053	2.75488	1.84201	2.88648	3.3218	4.09918	2.95995		-0.383534	-0.447323	1.29851	-0.162289	-1.32699	-0.489989	1.39625	0.171193	0.344977	1.37643	1.76591	-1.44289	0.437089	-0.721131	-0.572577	0.563543	0.0472616	1.135	-1.19325	-0.769893
569	2.37627	3.48244	0.229405	1.20594	3.02287	1.23385	2.72806	3.69801	3.94858	4.0883	0.391669	2.49396	2.39535	2.24832	3.62619	4.25757	8.11253	6.32816	6.55253	4.51849	5.55446	4.41623	2.56235	1.8165	2.39717	4.67789	4.99323	5.2345		0.58768	-0.944858	0.937995	-0.0428876	-0.172924	-0.551758	0.638163	1.20626	0.678494	0.406785	0.832703	-0.2927	0.10208	-0.814926	-0.691574	-0.946755	1.52693	0.686191	-0.0664801	-0.688766
570	3.22677	2.26232	-0.0921778	1.30626	3.61374	1.92712	3.29714	3.58034	2.27248	5.15425	1.16556	1.9677	2.97986	2.65672	1.20462	2.50518	6.67546	7.9165	5.29059	4.74326	5.49934	5.0309	2.95696	1.22623	3.11259	3.79098	4.86919	3.96255		0.52866	-0.68698	1.70697	-0.808144	0.00174924	0.290885	-0.0962432	0.71895	0.777147	1.03498	1.6072	-0.628737	0.287308	0.170077	-1.29095	-0.992289	-0.127805	0.316656	-1.63095	-0.892816
571	3.5398	3.36741	1.78711	2.91594	3.54484	3.21374	3.44321	3.85755	3.70178	5.85237	2.15688	0.919602	2.02988	2.41061	3.40528	3.70155	7.51595	7.71871	5.57014	5.10801	5.59529	3.9778	2.75287	2.12284	1.91375	3.75852	3.39814	5.0515		0.175296	-0.634705	0.988637	0.299747	-1.60513	-0.25953	-0.837531	0.296628	0.509562	0.489707	0.490603	-0.317017	-0.76877	-0.471148	-1.07838	-0.271922	0.311304	0.500412	-1.77032	0.94316
572	2.97881	3.21712	2.55826	2.2458	3.3786	2.78752	4.29413	4.47677	3.26886	5.0943	2.05026	2.30225	3.38787	2.97031	2.62498	2.62423	5.8997	9.3031	5.71525	4.48592	5.99104	4.73769	1.77711	1.77926	1.84109	4.50789	3.96815	3.99313		0.0241924	0.157568	0.316255	-0.822055	-0.00380702	-0.915043	-0.957054	0.889971	-0.490289	0.778036	1.17067	0.597748	-0.0196847	0.730574	-0.727852	-0.0176483	0.445701	-0.310746	-0.648683	-0.266175
573	3.56209	2.50071	1.98882	2.20627	2.41155	2.82067	3.46297	3.81046	2.88682	5.29325	1.99657	2.29278	2.4469	3.24441	2.44839	3.74199	6.33128	8.35056	6.76396	4.25981	5.56797	5.0805	3.11038	1.01691	3.65813	3.5256	4.41385	5.00828		0.148455	-0.075686	0.522912	-1.62692	-0.487722	0.258664	1.17743	-0.73506	-0.756418	0.893276	1.39317	-0.0026083	0.455287	0.999227	-0.211428	-0.658674	0.291701	0.543141	-0.562355	-0.580867
574	2.18469	1.53897	0.339074	0.86189	2.87285	2.65332	2.73462	2.76486	3.11087	4.15481	2.02138	3.03041	3.51597	2.64562	2.62509	3.92558	6.82088	6.30658	6.5742	4.68778	5.07882	4.77517	3.01697	1.70462	2.7741	4.78996	4.44726	5.30532		0.600298	-0.23434	1.66446	-0.779674	-1.31788	-0.219171	1.17538	-0.351641	0.248662	-0.258358	0.556772	0.69528	0.319052	0.686137	-1.64191	-0.63596	0.506832	1.18672	-1.68325	0.238198
575	3.46025	2.48758	1.9951	2.81425	3.45072	2.56754	2.85031	3.31468	2.5694	4.35771	1.51117	1.58707	3.25645	2.59022	2.8817	3.89685	6.79818	7.62999	6.4499	5.54549	5.873	4.04783	2.58542	1.1783	2.3428	2.21212	4.23067	3.79791		0.582183	-0.740028	1.97696	-1.37609	0.248706	-0.500823	-0.71004	0.469696	-1.46269	0.951647	0.739074	0.247693	-0.406282	0.81	0.00128517	-1.57845	0.232542	1.13879	0.250253	0.11873
576	2.6515	2.21363	1.0403	2.33017	3.52275	3.64935	2.36722	3.19781	3.88972	5.04774	1.43551	2.42878	2.88865	2.64333	2.85929	3.88428	6.74677	5.93398	6.25882	4.22816	4.91867	4.09819	2.97302	1.45666	2.46165	3.03088	3.82105	2.27869		0.272367	-0.0713631	0.946675	-0.368635	-2.26595	-0.139782	-0.885016	-0.213785	0.45947	0.613242	0.829611	-0.012132	0.791122	0.224633	-1.63008	-0.501838	0.788887	0.547558	-1.66251	-0.802672
577	2.91922	3.63247	1.213	1.55563	3.26935	3.30638	1.61396	4.54871	3.55801	4.8008	1.42366	3.07362	3.42758	2.45578	0.768154	2.59944	7.30171	7.34011	5.82338	4.91066	5.69897	4.78063	3.50187	1.76285	2.7197	3.1476	3.74617	3.86458		-0.765948	-0.0750933	0.861748	-2.53985	0.0959074	0.739698	1.31032	-0.461322	0.525268	0.38837	1.35794	-0.483025	-0.626277	0.348048	-0.815123	0.174437	-0.373651	0.263579	-1.20835	-0.264845
578	1.88183	2.72476	0.646191	1.29423	4.04349	2.11479	3.11716	3.65928	3.63727	4.29336	1.83829	1.85437	2.68034	1.72577	1.44994	3.05803	8.18865	7.70475	5.16912	4.60986	5.15756	4.18519	4.41143	2.21702	2.82214	3.85852	4.34269	4.59821		0.173203	-0.569751	0.768969	0.0227655	-1.11096	-0.65532	-2.57837	-0.483571	-0.101306	-0.0023994	0.633562	-0.183169	-0.748544	0.583474	-0.23264	-0.0121764	-0.260962	-0.453615	-0.659459	-0.825398
579	3.3298	2.25962	1.94145	1.92506	4.19562	3.7695	2.47685	3.61723	3.23439	5.16401	0.955902	1.68414	2.91812	3.21361	2.95415	3.75233	8.18425	7.50925	6.0404	4.54611	5.53971	5.90367	2.77891	1.08118	2.8033	2.18034	4.7818	4.76931		0.0645219	0.605854	-0.114706	-0.358592	-0.811818	1.52075	0.229427	1.53262	-0.495563	0.435792	0.640663	0.042529	0.067211	-0.875778	-0.8935	-0.177339	1.02972	1.24688	0.0286007	-0.751535
580	3.57957	3.12088	0.600921	1.42437	3.16005	4.1484	3.06984	2.78973	4.37059	4.22548	0.766902	2.59521	2.66679	2.46173	1.54634	3.69831	7.38113	8.37134	5.52476	4.32788	5.86615	5.38983	2.58853	1.61917	2.8888	3.57675	4.79722	3.50976		-0.283882	0.31875	-0.361179	-0.345109	1.48	-0.230505	0.419139	0.269173	-0.611304	1.03013	0.807603	0.159909	0.107256	-0.0600252	-1.08751	0.44343	0.522175	0.557312	-0.66512	-0.674405
581	3.05684	1.88852	1.16935	0.802468	3.54147	4.47323	2.77451	4.00541	3.23147	5.30367	1.54771	2.08062	2.0071	1.68646	1.93285	2.61785	6.51132	8.2966	5.14464	4.93996	6.02439	4.97447	2.21647	2.1543	3.4984	3.11904	3.66375	5.12139		-0.0233357	0.59944	1.00112	-0.101769	-0.426443	-0.244998	-0.430293	-0.0135192	-0.0298951	1.2015	1.65482	-0.337656	0.726015	-1.02609	-1.0138	-0.78997	0.232862	0.523871	-1.71594	-0.981009
582	3.29116	2.56517	-0.538143	3.07728	3.46191	2.92393	2.82835	2.39666	3.87355	4.46035	0.664516	2.93741	2.1509	1.30185	2.24607	3.84056	6.26395	8.7931	5.70925	4.80955	6.51092	4.17744	2.68562	1.34185	2.33572	3.91621	5.16671	6.11106		-0.92861	0.652223	1.11129	-0.238391	-0.20738	-0.840278	-0.405541	-0.151957	-0.417236	0.158122	0.442175	NaN	-0.126856	-0.89583	-0.910863	-1.21038	0.15493	0.86955	-1.83042	0.280765
583	2.49067	2.52683	0.365294	0.235938	3.06755	2.66932	3.07736	2.93228	4.35862	2.93717	1.31494	3.01482	3.06869	1.22871	3.19145	3.45168	7.77796	6.06824	5.59547	4.61109	5.42373	4.20589	2.81936	1.89043	2.65369	3.7801	3.36283	4.87204		-1.00023	0.868723	0.778047	-2.33546	0.682706	0.237351	0.364396	-0.79346	0.704792	1.44925	0.992551	-0.702615	-0.581858	0.736672	-1.24666	-0.209271	1.89706	-0.372402	-0.575583	-0.814527
584	2.07167	3.50662	0.368577	2.9002	2.6263	2.96126	2.10993	3.50564	2.95726	5.53187	0.274357	2.29684	1.93742	2.60907	2.17049	3.4676	7.16091	6.90001	4.6328	4.84891	6.41176	2.74962	2.84788	2.12251	3.6322	3.78423	2.61093	4.99738		-1.58194	0.682407	-0.959151	-0.823151	-0.457463	-1.08147	-0.461691	0.195748	0.0275843	0.868047	0.966953	-1.028	0.158286	-0.0317084	-0.175406	-0.881917	1.10053	0.32122	-1.64123	-1.02108
585	2.35276	2.45765	2.16934	2.32244	2.54424	3.01323	2.62242	3.90522	2.99863	4.36327	1.7123	1.53623	2.68147	2.12142	2.37213	3.94658	6.66114	8.69964	5.86399	4.35258	6.09382	4.64222	2.53494	1.47765	2.42704	4.4207	4.09583	4.09739		0.273985	-0.248401	-0.147935	-1.5101	-0.611207	-0.310573	0.163042	-0.693113	0.734977	0.413604	-0.800187	-0.522712	0.267422	-0.483585	-0.635829	-1.39795	0.550912	0.507408	-1.22896	0.243822
586	1.99972	2.71819	1.47543	2.09869	4.48046	3.54984	2.18719	3.80923	4.6629	4.03054	0.900983	1.92916	2.87247	2.26836	2.50135	3.00513	5.95101	7.76861	6.13789	4.33434	6.55377	3.56052	3.1738	1.66176	3.11599	4.83417	2.42377	3.95664		-1.117	0.68541	0.109365	-2.1763	-0.989099	0.511129	-0.86565	0.365816	0.225618	1.31249	1.75781	-0.682687	0.488812	-0.954031	-0.384618	-0.392507	1.30403	1.50162	-0.324603	-0.272114
587	2.12412	1.7299	0.463686	0.207719	3.66401	3.40336	2.60916	3.76909	3.41551	4.62494	1.68386	2.13135	1.3897	1.96497	1.89946	4.50023	6.02956	7.88311	6.2969	3.88372	6.0833	4.2668	2.074	1.70375	2.92742	4.62035	5.36724	6.48315		-0.495728	0.795634	1.24086	-1.77872	-0.606801	0.263006	-0.29473	-0.11734	0.367396	1.18782	0.924582	-0.534584	-0.0767715	0.643183	-0.809883	-0.384014	0.932283	1.36473	-1.71855	-1.30529
588	1.55224	1.89987	0.960642	1.89265	3.80461	3.83453	3.62008	3.41615	3.54098	5.10509	0.602518	2.35222	2.08621	2.69402	2.09771	3.4312	7.18019	7.4593	7.02643	4.60853	6.35363	3.82226	2.14648	2.16979	3.0737	4.02129	5.10723	5.36668		0.467414	-1.55562	1.28169	-0.799312	0.804817	0.330225	0.177472	1.28153	0.411723	0.630523	-0.381216	0.854921	0.0491502	-0.44011	-0.0997612	-0.636034	0.319788	1.0148	-1.50386	-0.741029
589	0.432707	2.95706	1.83333	0.301131	1.35514	3.78306	1.91008	3.62558	4.00694	4.68725	1.61119	2.70236	2.60506	2.67667	2.79558	3.5096	7.42656	9.13088	4.2766	5.21907	5.39318	4.57438	2.81265	1.46442	2.81206	4.00695	5.24565	5.0478		0.118369	-0.0327723	-1.18855	-1.34428	1.11147	0.21157	0.194812	1.24499	-0.156241	0.871173	1.3152	0.359484	1.08366	0.193859	-0.641507	-0.812887	1.78612	0.491663	-0.465486	0.691117
590	2.49041	2.51732	1.45462	2.44142	4.69589	2.33113	3.02605	3.52422	3.28849	4.27776	1.57577	2.28146	3.05361	1.78892	2.34649	3.46925	6.64525	8.3756	6.21641	4.48225	5.66148	3.51418	2.1553	1.61731	2.47592	3.16789	3.66217	4.38293		1.40283	-0.76017	-0.0121609	-1.32225	0.641248	-2.42116	0.294725	-0.0524704	-0.724594	0.540952	1.13842	0.819383	0.323379	0.0781148	0.000975124	-0.114158	0.957483	0.35769	-2.92795	-0.430078
591	2.49118	2.16499	1.92317	1.41964	3.13435	3.49961	2.66175	3.75935	3.34125	5.8821	2.4377	2.68842	2.22455	2.17051	2.65695	3.53634	7.04468	7.37202	7.14766	3.31033	6.10457	3.95522	2.01062	2.61866	2.22354	4.54714	4.06888	4.13435		-0.258086	-0.00978442	0.00154597	0.429279	-0.360563	-1.14904	-0.0705291	0.841955	0.159794	-0.185672	1.24015	0.476235	-0.366254	0.192215	0.204297	-0.876243	-0.913534	0.396402	-2.03129	-0.493009
592	1.73314	2.80682	1.99215	2.71609	3.21599	3.56933	2.26853	3.91148	5.39362	4.78542	1.0103	2.8981	1.91439	2.42188	2.50682	3.96144	6.71337	6.34446	6.77777	4.51628	5.68603	4.06121	3.21752	0.992246	2.52156	4.59233	3.4314	4.14371		-0.646613	0.597961	1.06012	-0.928661	0.208599	-1.31471	-0.227492	-1.154	-0.612129	0.954142	0.68772	-1.19227	0.373397	0.708469	-0.958702	-0.495829	1.18419	0.561822	-1.50984	-0.515231
593	0.976946	2.07364	-0.412694	1.96084	4.29431	4.2763	1.75784	3.90379	3.97881	5.71354	1.06135	2.84595	2.2475	2.37357	3.4146	4.29497	6.62509	7.27863	6.21146	4.57262	5.24546	5.03532	2.63671	1.25965	2.03083	3.50845	4.70968	4.93846		-1.85009	0.000163568	0.801635	-0.702558	-0.209012	-0.433757	0.421171	0.34496	1.04512	1.12785	0.439326	-0.407795	-1.74745	0.935209	0.23856	1.17153	0.111557	1.02925	-1.40942	0.108658
594	2.77606	3.21245	0.308444	2.56042	4.04764	5.14012	2.39826	3.90108	3.52811	4.73461	1.24074	2.95476	3.78284	2.85852	2.45183	3.88124	6.66609	6.46151	5.83509	5.01103	6.21589	4.60375	1.48742	1.87972	3.37341	2.271	4.52159	3.07538		-1.20555	0.51465	-2.19691	-0.527854	-0.779417	-1.5142	-2.70898	-0.270518	-0.71909	0.282867	2.42786	0.7429	-0.106941	0.768458	-1.21329	-1.53317	0.151971	0.758932	-1.25544	-0.555202
595	2.71781	2.31152	0.444994	1.97744	3.50869	3.37107	2.68637	3.88871	4.40279	5.18527	2.00167	3.12006	2.55882	2.01815	2.67249	2.51395	6.40672	7.80689	5.66061	4.68462	6.76123	4.06093	2.34915	2.86784	2.20009	4.53286	5.02797	4.03324		0.0389665	0.00584337	-0.424006	0.387087	-1.39925	-1.42418	-0.0485835	-0.627159	-1.74171	0.611106	0.390004	-0.171888	-0.318213	1.25906	-0.121152	0.189171	0.84434	0.652762	-1.75321	0.564362
596	2.68449	2.94408	1.56241	1.36517	2.46609	2.5828	2.76548	3.64451	2.95891	4.99961	2.31092	2.23082	1.33505	2.2345	2.63655	3.96036	6.91732	6.85753	6.83171	4.09674	5.09759	2.57259	3.95837	2.03531	2.14031	4.86623	5.04003	4.2387		-0.575879	0.346982	-0.20281	-1.9356	-1.79755	-0.407188	0.224764	-0.536208	0.00144548	1.47897	0.872613	-0.378096	0.0170212	0.533056	0.236497	-0.403407	-0.118434	1.0563	-0.647151	0.412251
597	1.42898	2.20294	0.801668	0.600914	3.1353	2.9454	2.238	3.4756	3.89271	4.6058	0.988718	3.13678	2.64974	2.06029	2.4062	3.25959	6.61619	7.07067	6.04954	3.96	5.42563	3.2728	3.12745	2.41904	1.0816	3.29956	5.19503	4.03091		0.424344	-0.395172	0.302989	-1.11956	-0.349403	-0.0264398	1.02097	-0.373208	-0.497253	0.804004	0.893801	1.04774	1.09608	-0.400489	-0.857214	0.903723	0.921682	0.619012	-1.4266	-0.949308
598	2.91097	2.16461	2.11541	2.2998	1.60598	5.12288	2.87574	2.25745	3.10153	5.86678	1.72714	2.9122	2.52533	2.19616	3.31668	3.8669	6.96081	6.34928	5.76366	3.97607	4.70825	4.45936	2.5542	0.950898	2.60123	3.50622	2.49448	3.67151		-0.606337	0.153581	-0.559443	0.142542	0.124117	-0.533334	-0.428677	0.452672	-0.0161042	1.32423	0.293302	-0.755265	0.354057	-0.982975	-1.00331	-0.772294	1.34483	0.477693	-0.858283	-0.233234
599	2.08197	2.40291	1.04606	2.02237	3.49784	3.16301	2.71711	4.31434	3.50398	5.42364	1.01577	1.93016	2.84399	2.50953	1.90709	3.50278	6.92341	8.02115	5.47777	4.30329	5.55825	4.59816	2.15284	2.29982	2.2052	3.94046	4.18408	5.02451		0.0548617	-0.353112	1.22477	-0.931586	-0.284213	-0.349814	-1.57078	0.148686	-0.0787147	1.31648	-0.977417	-0.708187	0.45267	0.393547	-0.0554964	0.440558	0.201191	0.364206	-1.83719	-0.538743
600	1.28879	2.37694	-0.0162466	1.81164	3.26611	4.21977	0.551125	2.80006	3.3789	3.9666	1.13709	3.12226	1.71235	1.23596	3.7443	1.81832	6.34682	9.11969	7.01736	4.73042	5.63567	4.13704	1.84259	1.19166	1.07625	4.25211	4.89634	5.50683		-0.648547	0.596123	0.178739	-1.74626	-1.27469	-0.901037	0.912927	-0.102436	1.45389	0.69648	0.397996	-0.374213	0.491199	-0.145397	0.583201	0.515632	0.665914	0.334417	-1.25026	0.415391
601	3.49571	2.01592	1.25339	1.21646	3.10155	3.18628	3.19223	2.76855	3.57334	5.17273	1.82809	2.63	3.1419	1.51822	2.4567	4.44532	7.65903	7.60598	6.21627	4.22697	5.5468	2.99284	2.55357	1.3503	2.21184	4.04774	3.97488	5.70491		0.223477	-1.08849	1.48941	-1.56025	-0.848226	0.943648	-0.583345	0.821339	-0.833504	1.07417	0.753289	0.0983228	-0.276068	0.221875	0.284524	-0.396186	1.05602	0.626075	-0.47789	0.58178
602	3.02465	1.89619	0.799354	2.92575	3.11064	3.92679	2.70514	4.51394	3.28919	4.22598	1.26727	2.3792	2.80013	2.70083	3.21138	3.42584	7.50102	7.30708	6.65661	4.79032	6.05247	3.47665	3.09511	0.985933	2.72961	4.47431	4.09327	3.39314		0.153612	-0.875032	0.546535	-0.509996	0.0904498	-0.269991	0.634023	1.22915	-0.260202	0.248514	2.0501	-0.970498	0.1231	0.3765	0.441229	-1.28707	0.705807	0.80901	-1.15815	-0.111273
603	2.95351	1.80055	2.01006	1.0251	2.95301	2.60817	2.20192	2.73188	3.99557	4.91889	2.41224	3.47595	2.03088	2.3526	1.89605	2.35451	6.6465	7.49278	5.68298	4.31961	5.86347	4.04299	2.21584	2.12913	2.63557	4.14881	3.92869	5.97161		-0.00970339	-0.278878	1.28399	-0.520337	-0.346032	-0.643614	-0.213232	-0.334685	-0.0218419	0.0681502	1.27525	-0.117228	-0.059061	0.390769	1.43961	1.12671	-0.120778	0.58743	-2.33903	-0.0227066
604	2.51539	2.82821	-0.432174	-0.0668447	3.47541	3.2476	-0.136728	2.7431	3.8019	5.96446	2.19161	0.979758	1.67143	2.54659	2.57627	2.52276	7.77773	8.93953	5.89385	4.96452	5.66771	4.42809	2.37909	1.65148	1.52009	4.2957	5.01731	4.73967		1.15092	-0.327332	-0.818049	-1.37791	0.68517	-1.37708	0.571064	0.665098	-0.32245	-0.142759	0.138788	-0.0824894	0.674352	0.301547	0.942212	-1.23771	-0.0983758	0.31063	-0.331681	0.113528
605	0.585606	2.05579	1.34128	-0.383523	1.48882	2.80003	2.80993	2.80523	3.83043	5.55023	0.944592	1.98516	3.08758	1.23391	3.08893	2.83424	7.49454	7.60131	5.83534	4.80586	5.61025	4.08979	3.74454	0.415521	2.17558	3.59106	4.3991	5.18014		0.691684	-0.527057	0.674754	-1.51635	-0.516885	0.326732	0.554849	-0.356596	-0.687845	0.5186	0.79462	-0.233146	1.57197	1.14086	0.425758	-0.147515	1.14597	0.178486	-2.23841	-0.102649
606	2.1319	2.65709	0.500298	0.65311	2.50232	3.90989	2.83752	4.0818	4.44929	5.8101	1.35277	1.10094	2.65541	1.55992	3.10671	3.70647	6.45292	7.1932	6.13874	3.60316	5.37862	3.70974	3.62581	1.68306	2.34285	3.89451	4.1324	4.59834		0.6218	-0.541696	1.01785	-0.422622	-0.522596	0.175776	-0.0812855	-0.0178632	0.584376	0.035877	0.655085	0.968194	-0.29699	-0.0419972	-0.616371	0.596895	0.0886871	0.505315	-1.47603	0.588817
607	1.29849	2.20127	1.59423	0.849793	3.07916	4.00525	0.905342	3.44513	2.73499	3.86719	1.26972	1.63404	2.49207	0.915889	2.71751	3.32844	6.46444	8.24656	6.05506	3.07324	5.83411	4.78526	1.22104	2.28921	3.39686	3.76396	4.73531	5.16908		1.20271	-0.308257	1.31179	-0.475865	-0.572342	-1.17525	0.288254	0.350915	-0.403306	1.48157	0.673612	-0.855151	0.618974	-0.246204	0.60518	-0.450681	1.53422	0.204168	-1.42886	-0.442456
608	2.28823	1.86825	0.811298	0.2114	2.86825	3.42096	2.93317	2.93678	3.85562	5.2509	2.27407	2.47922	2.21549	2.85882	1.46454	3.45469	6.03158	6.6769	4.03189	4.27633	6.02423	3.75286	0.994887	2.53539	3.24121	4.74947	3.69054	5.44006		0.758273	-0.528535	0.122452	-0.50721	0.417464	-0.855435	0.0246364	1.22685	0.191754	1.45804	0.990841	0.438941	-0.821194	0.121958	-0.829866	0.0579274	1.15259	1.1625	-1.44017	-0.730195
609	2.73216	3.00468	1.67207	-0.346481	3.00825	3.83735	1.6027	3.91938	4.6243	6.05747	0.771238	1.49652	1.69325	2.84928	2.49129	2.99084	7.69624	7.06668	5.74486	4.24428	4.83116	4.76216	2.931	1.89079	2.06985	3.90058	4.79659	3.16276		-1.29374	0.363505	1.04881	-0.161147	0.631057	-1.19396	-0.516289	-0.224037	1.70139	0.0221612	-0.110207	-0.170394	0.0558316	-1.47255	-0.255909	0.168488	1.00014	0.691175	0.929482	-0.235131
610	3.06457	3.28545	1.60268	0.255261	4.08823	5.05719	2.31455	2.58948	3.94836	4.05403	1.36692	2.85404	1.43161	1.1536	3.07264	3.91538	6.59487	7.36164	6.65017	3.53331	5.62565	4.66488	3.19871	1.50952	3.39008	4.25582	3.5807	2.43206		-0.430132	-0.239843	-0.831275	-0.98478	0.140481	-2.44514	0.367334	-0.251472	0.162393	1.3068	0.786417	0.134993	-0.193532	0.856811	-0.645148	0.653328	1.44231	1.0629	-0.936668	-1.11881
611	3.19768	1.965	1.47617	1.85463	3.02095	3.29402	2.53261	4.65723	3.653	3.78275	3.25693	2.62791	2.41103	1.59146	3.26305	3.023	6.47525	7.89019	6.137	4.64597	5.58021	5.20927	2.89019	2.02559	3.16567	4.62683	3.3354	5.38172		-2.02561	-0.272716	0.201362	-0.150251	0.926708	-0.893615	0.141783	-0.874793	-0.558083	1.28901	1.3112	0.479318	-0.251442	0.735145	-0.0434515	-1.69175	1.5391	-0.0251033	-0.929045	-0.0825075
612	2.78921	1.54953	1.11386	1.15618	2.68774	4.60118	2.40399	4.38385	3.29573	4.18515	1.70464	2.6986	3.19546	2.72872	2.62885	3.42569	7.31845	6.71307	6.00203	3.5156	5.16626	4.91896	2.63451	1.12718	2.75359	2.91264	4.01797	5.86869		-2.42511	0.47977	1.44184	0.166655	-1.36986	-0.193762	1.29332	-0.858214	0.405028	0.602078	0.994907	-0.550174	0.828302	0.791139	-0.818963	-0.26253	0.0100798	0.616236	-1.55099	-0.0739985
613	1.958	3.17127	0.143979	0.890015	2.45946	3.4203	2.46404	3.76751	4.00764	4.0136	1.24162	2.90841	1.90679	1.17019	0.214393	3.53175	7.13793	7.19541	6.79742	3.11137	5.44744	3.79937	2.6388	1.45386	2.68234	4.39547	4.73043	4.20015		-0.648958	0.645351	0.950849	-1.23898	-1.176	0.573124	1.56628	-0.654517	0.823717	0.805699	-0.296029	-1.02282	-0.170424	1.60667	-0.859034	-0.886382	-0.807423	0.967041	-1.51205	0.11792
614	2.00824	1.53211	0.890565	1.09681	2.42089	2.80171	0.653676	3.76501	3.79924	4.10082	1.2334	2.61127	2.58574	1.9718	2.85641	3.41934	7.03743	7.5624	5.58289	3.46108	5.34304	4.52655	2.63593	2.2528	2.49998	4.19488	2.94028	4.80608		0.370103	-0.186997	0.206416	-2.18634	-1.3479	-0.083958	-0.360398	1.15078	-0.716096	0.534108	0.774798	0.366292	-0.232154	0.851899	-0.205109	-1.20314	-0.640665	0.377276	-2.40282	-0.170629
615	2.02444	1.82575	0.338128	1.15983	3.23144	4.26426	1.6535	2.22413	4.66921	5.68419	1.63343	1.92909	2.72738	1.63954	3.58385	2.61153	6.85991	8.31937	6.86255	4.06703	6.03584	4.62442	3.04774	1.63484	1.04229	4.13365	4.87142	5.83632		-0.434868	0.602709	0.428531	-0.780357	-0.63448	1.02201	-0.505245	-0.710701	-0.18157	0.478202	1.02829	0.162532	-0.0294926	1.05587	-0.204845	-1.31381	0.314044	0.836067	-2.07384	-0.902582
616	2.09078	3.75842	0.72363	1.20852	2.80133	1.94847	0.801399	2.65351	2.88061	4.62658	0.871424	2.29851	1.09755	1.74426	3.5332	2.23922	6.66509	7.13286	5.4204	4.853	5.0972	4.05561	3.20493	1.55944	1.76767	3.25782	2.50795	6.27485		0.0258089	0.239859	0.0969585	-1.87153	-0.54558	-0.0576113	-0.280077	1.23672	0.558417	1.30099	0.87577	0.830729	0.201324	0.281895	0.188147	-0.412144	0.860123	0.688609	-1.55546	-0.210081
617	2.90666	1.78765	1.22437	1.51549	2.00462	3.56979	2.29021	1.4328	4.35401	4.75756	2.18923	3.41609	1.832	2.40166	3.19913	3.88351	6.01913	8.61773	5.97655	4.97993	6.26614	4.04175	2.34015	1.68418	1.94341	4.11484	3.19178	4.66693		0.558	-0.228998	0.756948	-0.987298	-2.38948	-1.44738	1.49198	-0.243975	0.784393	0.958638	0.81413	0.450942	0.585317	-0.0904628	-1.0669	-1.28222	0.447865	1.358	-1.87929	0.409513
618	2.43323	2.38978	1.61766	0.0899826	1.75848	3.06635	1.28355	4.05124	4.53154	5.27377	2.12699	1.80707	2.99715	2.29686	3.39346	3.19137	7.14519	7.74135	6.14421	4.41504	5.92511	4.17468	1.7557	1.28511	3.41438	3.66258	2.04493	5.00239		-1.02519	-0.0114147	0.800231	-1.01169	0.0695048	-0.376071	0.11896	0.297629	-0.447092	-0.198808	1.2677	-0.996336	0.899508	0.780695	-1.47017	-0.106257	0.198057	0.908003	-0.995238	-0.0950068
619	3.08456	3.15056	0.884314	1.80724	2.23002	3.0055	3.05801	3.36414	4.31811	4.41037	2.0473	2.83312	0.584003	2.39409	3.09349	2.20169	6.43939	8.10455	6.34235	4.77313	5.30458	4.24193	2.37922	0.786814	2.38584	3.1433	4.17917	6.04376		0.784891	-1.03013	-0.111283	0.256728	-0.466183	2.52797	0.669411	0.237726	0.80521	0.65934	0.844251	0.708392	0.74637	0.259778	-1.25029	0.307193	-0.877479	1.98431	-1.97224	0.349732
620	3.07413	0.930962	0.848253	1.28832	1.92732	3.61519	1.55044	4.24072	3.93668	4.51374	0.743383	2.89924	2.06509	2.44534	3.18777	3.51772	5.99085	7.93551	6.52626	3.49886	6.13907	4.53713	1.17948	1.64962	3.49699	3.13718	4.37655	5.52562		-0.588032	-0.133802	0.499903	-1.38185	-0.506952	-1.83108	0.90067	-0.170927	0.593486	-0.687471	0.910161	0.745071	-0.714371	-0.756978	-0.100226	-0.106954	0.853227	1.04638	-1.75503	-0.489456
621	2.54569	2.49348	-0.37645	2.28499	2.14048	3.15057	1.90004	4.53523	3.89206	4.54634	1.86619	3.05179	1.93561	1.65418	2.11247	3.80032	7.03721	7.27152	6.77467	4.43006	4.20267	4.31767	2.16116	0.265926	2.83781	3.1703	4.4878	4.81736		-0.787278	0.822574	-0.312866	NaN	-0.735877	0.668968	0.0945151	0.0666496	0.384317	0.53701	0.492826	0.298276	-0.973754	0.331636	-0.171746	0.292384	-0.76583	0.176771	-0.99848	1.09846
622	1.94669	2.60907	2.34418	0.727545	3.29535	3.17674	0.430407	2.56394	3.83997	4.71769	1.83407	1.98021	2.19222	1.76815	2.82127	3.32789	6.106	7.26108	5.69078	3.64364	6.84172	3.99856	2.86519	1.12353	1.88255	4.37246	3.60923	5.05081		0.0892354	0.161513	0.331365	-1.22384	-0.265477	-0.461152	0.416634	1.05096	1.05757	0.404946	0.522219	-0.447461	1.39072	-0.649982	0.383923	-1.07531	0.244125	0.428537	-1.37813	0.942614
623	0.723362	2.11163	0.732192	0.819257	2.79211	4.20621	1.16556	3.38788	3.80541	4.99279	1.96746	2.18522	2.39121	1.37913	3.46424	3.04535	7.17171	9.09074	4.79331	5.13447	4.83217	2.86663	2.30379	0.893787	2.39508	4.79469	5.19975	4.2955		0.250593	0.382376	1.09759	-1.74714	-0.244099	-0.469092	0.161146	-0.313044	0.58813	1.14901	0.44315	0.853147	-0.403534	-0.602537	-0.291799	0.30707	1.03839	0.588335	-2.08473	-0.150114
624	1.2101	2.34109	0.627715	2.72447	2.12039	3.85042	3.35616	4.03604	4.15751	5.1467	0.922451	2.07255	2.32128	2.62867	1.99792	3.20153	6.42329	7.60186	6.83464	3.7927	5.55478	4.48947	1.42032	0.386545	2.97812	2.86397	4.98177	5.85965		0.810534	-0.977942	0.783527	-0.640119	0.053264	-0.795067	0.693149	0.078199	1.65222	0.463886	1.12049	0.307194	-0.553314	0.778267	-1.13388	0.612748	-0.38442	0.0098956	-2.01458	-0.459582
625	2.43439	2.84574	0.433335	1.59702	2.59756	5.12231	1.2002	4.24583	5.05357	4.61868	2.67681	1.77357	2.38623	2.32975	1.19234	3.21567	6.04768	7.2676	5.76677	4.52434	5.42457	4.63767	2.04611	1.62185	2.29133	3.54016	4.69289	5.50812		-0.600415	-0.722391	0.721036	-1.60727	-0.268796	-0.626663	0.930131	-0.834969	1.77458	0.252447	1.20186	0.350431	0.188033	1.00185	-0.657704	-1.11169	0.874454	0.387955	-1.1947	0.452011
[truncated: 5 more columns]

## Sheet: Fig 3B
Source Data	Figure 3B	ASH VGLUT-pH Data: individual dF/F(%) traces
		Three trials per animal: Read from left to right; Trial 1 signifies a new animal
		Acquisition Rate: 5 Frames/sec
		Pulse 1		Pulse 2		Pulse 3
		Stimulus On:	Frame 150	Stimulus On:	Frame 300	Stimulus On:	Frame 450
		Stimulus OFF:	Frame 200	Stimulus OFF:	Frame 350	Stimulus OFF:	Frame 500
	wt (TeTx Array Negative)																									ASH TeTx
Frame / Trial #	1	2	3	1	2	3	1	2	3	1	2	3	1	2	3	1	2	3	1	2	3	1	2	3	Frame / Trial #	1	2	3	1	2	3	1	2	3	1	2	3	1	2	3	1	2	3	1	2	3	1	2	3
1	-0.703742	-0.314067	-0.176438	0.604806	1.0668	1.75381	0.613947	-0.737637	-0.394942	-1.69412	-0.563153	0.131951	NaN	NaN	-1.29011	0.53534	-1.03451	1.45262	0.949591	1.02456	1.94079	-0.0280311	-0.292186	-1.37191	1	-0.349266	0.885427	0.826611	-0.671407	-0.591209	-1.30235	NaN	1.74122	-0.681307	-0.939095	-0.617235	-0.475559	1.50281	-0.219613	0.51307	0.650035	-1.91431	0.059869	-0.742037	-1.64543	-1.55761	-1.58639	-0.393949	-0.708064
2	-1.62426	0.970967	0.155457	0.360863	0.79867	2.48859	-0.47955	0.238495	-0.416305	-0.684015	NaN	0.590919	-1.16139	-1.37554	NaN	-0.0985871	-1.84263	0.374074	0.623969	-0.603581	2.25534	1.08771	0.104592	-0.144267	2	-0.620045	0.633006	-1.94332	NaN	1.34305	-0.701733	-1.07507	1.5506	-0.37481	0.222597	-0.835415	-0.154764	1.51298	-0.330466	-0.0956571	0.386316	0.712434	NaN	0.163313	-1.51127	NaN	-1.66375	0.837452	0.106417
3	-0.835186	1.06311	1.9458	0.656247	0.873047	-0.218716	2.04711	NaN	0.594424	-0.328749	1.0992	2.15009	NaN	-0.500205	0.0788572	-0.514887	-0.83293	-0.16559	-0.20243	1.18353	0.779609	-0.818152	-1.80481	-1.0749	3	-0.455989	0.0125037	0.0551	-1.69126	-1.17775	-0.395217	-1.443	-0.267485	3.00481	0.304081	-1.89509	-0.206735	0.458257	0.414385	0.902056	0.365593	-0.25851	NaN	0.733364	-1.1786	0.957256	0.146114	-1.32	2.17029
4	1.16348	1.16103	-0.169865	0.299804	0.585488	1.31007	0.935012	0.518462	2.00964	NaN	-1.45608	0.393374	-1.34604	-0.73575	0.908277	-0.0520628	-0.895036	-0.345882	0.925444	-0.50571	-1.18735	-0.755336	0.888711	-0.0590536	4	-1.58437	-0.788115	-0.748419	-0.31137	-1.03216	-0.500173	0.219861	1.35967	-0.0562404	-0.949398	-1.61355	0.137945	1.17855	0.24153	0.275193	1.28751	-0.0377175	-0.628455	-1.15899	-1.50772	-1.0558	-0.398275	0.556213	1.03799
5	-0.831798	0.385627	0.503044	-0.965788	1.14163	0.920878	0.784779	0.252446	-0.219156	-1.50064	-1.008	0.485845	-1.07291	-0.131466	0.334765	-0.895216	-1.68112	-0.684213	1.08717	0.617993	1.27148	1.12362	-0.841416	0.229164	5	-0.117443	0.276991	1.44904	-0.352265	-0.744452	0.229882	-1.54113	0.252674	0.855275	-1.44641	-1.89666	-0.375264	1.71858	-0.170736	0.114853	0.030432	0.0588055	-0.985145	NaN	NaN	-1.10289	-0.694102	0.100198	-0.227909
6	-0.904154	0.721203	1.16019	0.313032	0.291431	1.42656	0.0541985	-0.719839	NaN	NaN	0.32897	0.938818	-1.09262	-0.471368	-1.43255	0.26619	-0.173557	1.13973	0.736249	0.372736	0.320179	-0.112066	NaN	-0.562862	6	-1.17946	0.486293	0.612463	-0.748553	-1.19371	-0.00119272	0.136304	0.720493	-0.942575	-0.796266	-1.17678	0.278858	0.894774	0.378763	0.241424	0.809156	0.20615	0.119919	-0.371476	0.536897	-0.493701	-0.14179	-0.855274	2.36573
7	0.0112689	1.73064	1.11818	2.12157	0.524324	0.5442	0.591162	NaN	-1.36026	-1.68074	-0.079136	-0.0760091	NaN	-0.022032	-0.257613	0.342181	-0.693167	0.485494	1.25329	0.638678	0.618929	-1.52686	-1.0677	1.53793	7	-0.310205	0.765019	-0.302176	-0.765994	-1.1218	0.195331	-1.71426	0.290197	0.210008	0.147355	-0.438221	0.0488966	0.921262	-0.355405	1.53905	-0.904495	-0.239876	-0.986713	0.103529	-0.936591	-1.13109	-0.308885	0.0334189	-0.659382
8	-0.475295	0.154976	0.0212719	-1.19096	2.07497	1.6038	-0.0346865	0.661747	1.34513	-1.60391	-0.421496	1.1939	-0.457655	-0.130178	0.119525	-0.316129	-0.419675	-0.816298	0.0787429	0.876152	0.85491	0.723317	-0.36366	-1.26682	8	0.50709	0.576822	0.258461	-1.71918	0.890878	0.414511	-0.604867	-0.473874	1.53135	0.330507	-0.310955	0.565661	0.223177	0.362545	0.707123	-1.33319	NaN	1.86643	-0.235962	-0.996248	NaN	-0.48825	1.692	0.422122
9	-1.00636	0.396051	-0.00530904	0.863671	2.09926	0.588353	0.376465	-0.214582	1.23388	-0.486082	0.865504	1.61062	-1.61453	NaN	-1.26831	-0.281127	-0.00501234	0.927768	1.17118	1.21616	0.673449	-0.537842	-0.436927	-0.877397	9	-0.427564	1.4311	1.10146	-1.8392	-1.33873	0.70061	-1.30933	-0.675277	0.071237	-1.07444	-0.170742	-0.376838	1.32009	-0.606222	-1.12098	0.799166	-0.742492	-0.657999	-0.279603	-1.73673	-0.471837	-0.870855	-1.43393	0.767006
10	0.161011	1.06378	-0.00582696	-0.0912612	2.73766	1.3033	-0.0619063	NaN	3.39653	-0.536073	-0.576651	-0.146267	-0.0510012	-0.511953	0.257484	0.436733	0.117767	-0.599344	1.25927	0.653534	0.726845	-0.0179591	0.378527	-0.31861	10	-0.536416	1.71363	2.02053	NaN	NaN	-0.503107	-1.0581	0.116798	1.16513	1.32905	-0.11595	-0.826038	1.47545	0.205272	-0.893442	-1.48501	-1.4147	-0.572655	-0.275881	-1.73313	-0.775673	-1.71572	-0.820052	0.611165
11	0.733477	-0.086902	1.28632	NaN	1.66958	1.75332	-1.1106	-0.358907	-0.89367	NaN	0.855734	-0.494086	-1.36139	0.075637	0.112493	-0.078317	0.0350218	-0.525912	1.13898	-0.567444	1.41631	-0.491824	-0.648524	-0.00830449	11	-0.544886	1.11279	0.330567	NaN	-0.981728	-0.687277	0.495452	-1.33541	-0.652675	-0.240555	-0.882049	-1.41019	1.24953	0.726863	0.860841	0.278034	-1.13846	0.0119119	-1.18071	-1.65103	-0.583452	-0.325556	1.10018	1.14259
12	-0.133093	0.670843	1.24842	0.0144157	1.46643	-0.0555592	2.07309	-0.649899	-0.0960653	-1.80248	NaN	0.830365	-1.42563	0.174621	0.99984	-0.383411	-0.155028	0.503967	0.739471	2.09592	0.289351	0.778582	0.76377	0.372504	12	-0.0567301	0.963578	0.0234696	-1.01988	-1.76011	-0.509164	0.538586	0.566526	-0.145982	-1.69323	-0.389711	-0.742465	1.11353	-1.15562	-0.872481	0.445691	-0.461802	0.635559	-0.510878	0.352683	-0.562258	-1.23248	0.504025	1.84592
13	-1.0359	-0.0554725	-0.215696	0.0496331	1.67052	1.51304	0.0408301	-0.209682	0.977732	-1.47564	1.18194	0.438147	-0.686479	0.000872448	0.000975714	-0.538815	-1.31713	-0.547112	1.04091	0.966833	1.4817	-0.335453	-0.45212	NaN	13	-1.09662	0.961651	-0.860937	-1.19315	-1.318	-0.158126	0.550576	-0.0784927	0.157828	-1.00205	-1.82372	0.372986	0.0696091	0.753868	0.0419323	-1.24754	0.0946732	0.504552	-0.304068	0.382497	-1.51031	-0.680755	0.909562	0.815683
14	-1.5143	1.03616	-0.208099	0.189097	1.48215	1.15667	-1.90982	-0.290841	1.35779	-0.667262	0.281851	0.916295	NaN	-0.414942	-0.942652	-0.642127	-0.364344	0.43214	0.982876	-0.191185	1.33961	-1.06631	0.693377	0.0346941	14	0.833775	-0.201642	0.0527826	-1.01216	-1.07177	0.650745	-0.780055	1.19082	1.27497	-1.41677	-0.0279997	0.727083	0.634662	0.0543872	0.105246	0.303827	-0.810793	NaN	0.295028	0.467497	-1.34599	-0.124639	0.22191	0.640293
15	-1.03228	0.886942	0.34417	1.37674	1.19744	0.236402	1.68976	0.857197	1.90519	-1.39967	0.104937	-0.509241	-0.934296	0.758645	-1.24295	-0.741168	-0.503698	-0.209116	0.374911	-0.250808	1.70347	-0.782037	0.763888	NaN	15	1.70947	0.749877	-1.27839	-1.01594	-1.56175	0.446508	-0.626439	-0.563612	2.80903	-0.990875	-0.588296	-0.465639	1.9498	0.0682334	-0.109765	-0.275497	-0.980927	-0.670876	-0.133269	-0.825686	-0.867157	-1.44514	0.185785	-0.45628
16	-1.31086	1.22404	0.237833	-0.355913	3.14018	0.167265	1.03896	-0.688556	-0.12144	-1.64313	0.3257	-0.115654	-0.637719	-0.717121	NaN	0.370943	-0.0922476	-0.547285	0.526956	0.530508	0.893382	-0.302146	-0.848295	-0.416218	16	NaN	-1.03329	-0.763759	0.95634	-1.21359	0.621419	1.01985	1.15014	1.12203	-0.603713	-0.559633	0.151737	1.04382	0.634469	0.829577	1.62628	-0.396403	-0.298877	0.834066	-0.69548	-0.115373	-0.333629	1.09525	1.06517
17	-0.934192	0.729087	0.862021	1.00567	2.03058	-1.91668	-0.471277	-0.16509	0.0926941	-0.947581	-0.558025	-0.117266	-1.76321	-0.06788	NaN	-0.526153	-0.790401	0.071575	0.269019	1.03228	0.368218	0.118028	0.879955	0.90132	17	0.339618	1.28894	1.66318	-1.97947	0.431393	-0.759829	-1.35616	-0.0873877	1.19602	-1.18335	-0.762789	-0.314957	1.00138	0.855157	0.486743	0.081841	0.267097	NaN	0.596364	0.182322	-0.877301	-1.15693	0.298019	0.436701
18	-1.97792	0.355477	0.38702	0.0165882	0.421095	1.7969	-0.855846	-0.521729	0.311393	-0.953242	-0.22759	0.778934	0.84833	0.895008	-1.90406	0.173118	-0.626605	-0.411727	1.50147	1.20633	1.18528	-0.672889	-0.590794	-1.17525	18	-1.45076	-1.41078	NaN	-0.346687	-0.708934	0.330065	-0.576256	1.21169	1.56171	-1.08218	-0.28785	0.250552	1.04563	-0.531479	0.213261	-0.761852	0.192111	-0.34717	1.27308	-1.39851	-0.450359	0.292583	0.163185	1.22316
19	-0.996561	1.08993	-0.864901	1.11564	-0.135931	0.172909	0.0526102	0.275418	1.71861	-0.384611	0.0986417	-0.445783	0.0327689	0.787788	-0.170376	-0.700294	-1.12225	-1.16478	0.572834	-0.451377	0.841707	0.436128	-0.835951	-1.17664	19	0.0458394	0.237337	-1.46617	-0.0413916	0.918497	0.224889	-0.0423882	0.0938047	0.395224	0.190237	-1.47156	0.171714	1.30933	-0.0855651	0.207038	-1.85929	1.48965	-0.242484	-0.584944	0.0180549	-1.00114	0.309179	1.39545	0.875815
20	-0.182205	1.12757	0.689211	0.642426	-0.280908	-0.0868384	0.365329	-0.181702	-0.795596	-1.4835	0.410186	1.04008	-1.07464	-0.984132	-0.398641	0.780796	-0.720843	-0.0630899	0.325749	-0.220392	2.02798	-0.145014	0.836058	-1.78162	20	1.31057	-0.0430396	0.0561235	-0.952784	-0.446649	-0.715951	-0.641192	0.259481	0.680196	-1.24387	-0.428387	0.0358193	1.70119	0.0428241	-0.636345	0.459883	-0.666344	-1.5706	-0.156619	NaN	-1.29213	-0.0836164	1.62384	-0.724635
21	-0.293243	0.978232	0.908577	1.70447	0.102663	-0.246622	2.93895	1.1584	-0.388425	-0.642006	-0.825329	0.667053	NaN	-1.11209	NaN	0.274412	-0.760028	-0.351441	0.833629	0.943375	0.715635	0.0933022	0.326611	NaN	21	0.916285	0.370452	-1.94125	-1.57359	0.248164	-0.483109	-0.581635	0.359666	0.824784	-0.671543	-1.17235	-0.0292914	1.34265	-0.787631	1.49615	0.0837232	-0.059023	NaN	-0.46067	-0.538692	-0.0739776	-0.29461	0.687454	0.892673
22	-0.446404	1.22122	0.699268	0.336742	1.03218	2.59424	-1.9077	0.189031	-0.190546	-0.188758	0.723094	0.647329	-0.941642	-0.450087	-0.711676	-0.240417	-1.05411	-0.812086	0.644037	0.596799	0.761803	-0.600368	NaN	-1.61382	22	-0.758678	0.620224	0.616344	NaN	-1.01775	0.884221	-1.06376	0.95969	0.705093	0.066355	-1.08329	-0.252214	1.24283	0.529927	0.437975	1.14144	0.155079	0.719934	0.398609	-0.962085	-0.761216	-1.97774	-0.1011	0.455237
23	NaN	0.484432	-0.362177	1.80952	0.573147	-0.211505	1.00649	-0.559241	1.36876	-1.31195	-0.32164	-0.773054	NaN	-0.520672	-1.38444	-0.527609	-0.14403	-0.281118	0.960203	0.599245	0.201738	-0.633984	-0.022291	0.926727	23	0.426129	-0.734435	-0.812777	-1.8199	-0.90017	-0.412109	0.339215	1.62762	0.600546	-0.456591	-1.01554	-0.0415037	1.33733	-0.384346	0.434106	NaN	0.837641	-1.04145	-0.729182	-1.03753	-1.03466	-1.10781	0.989117	0.50689
24	-1.33172	0.942874	1.41824	1.76255	1.30033	0.703322	2.01525	0.868986	1.65957	0.0145148	0.401376	2.12033	NaN	-1.22162	-0.638994	0.383878	-1.07735	-0.26686	1.10989	0.351303	1.81979	-0.528257	-1.49707	-1.35198	24	0.941269	2.01826	-0.808082	-1.23473	NaN	0.597022	-0.666725	1.74857	0.500163	-1.85641	-0.380407	1.05624	1.11021	0.512341	0.0961727	1.58018	0.958483	-0.863509	-0.203742	-0.498422	-0.14625	-0.949974	0.459809	0.875624
25	-1.3866	1.01083	0.359371	-0.249561	0.429359	1.41251	0.87404	0.747851	0.560496	-0.811413	0.59462	-1.00991	NaN	-0.518009	-1.49771	0.482349	-0.650905	0.124383	0.940688	1.3029	1.05055	-0.519534	-1.42132	0.0396524	25	0.197611	0.286347	0.38866	-1.03842	-1.37797	0.373416	-1.20241	1.11773	-0.236584	-0.0460403	-1.56437	-1.13327	1.49237	-0.246201	-1.03007	-1.24273	-1.94736	NaN	0.046795	0.0665465	-0.800744	-0.797371	-1.27555	0.382221
26	-1.628	1.67859	-0.250097	-0.544406	1.76812	-0.778752	0.00311274	-0.714297	1.28299	-1.23458	1.14001	0.413374	-1.14715	-0.698825	NaN	-1.98159	NaN	-0.0311223	0.110325	1.30843	0.0768912	-1.16418	-0.2013	NaN	26	1.43056	1.17636	-1.79775	-1.12271	0.0140664	1.16985	0.58019	2.61324	1.18065	-1.2489	-1.61001	-0.438245	1.12853	0.416234	-0.266988	-1.96332	-0.160813	-0.813766	0.436583	-0.759356	-0.562854	-0.632272	0.687559	1.14519
27	-1.1884	1.07379	-0.334702	-0.937822	0.721412	-0.481827	1.29455	-1.11129	0.0824434	-0.109816	0.226724	-0.948807	-1.16418	-0.0591789	-0.870984	-0.251666	0.448635	-0.540754	0.994037	0.915403	0.680813	0.995528	2.18643	0.313125	27	0.744371	0.909465	0.247294	-0.668792	-0.901522	1.20027	0.853836	0.269644	1.43839	-0.130016	-0.859942	-0.0472839	0.442787	-0.19327	-0.491587	-1.9116	-1.70797	-0.511063	-1.03344	0.533414	-1.44564	-0.555808	1.52992	-0.643071
28	-0.987686	0.937915	0.4288	-1.18769	-0.184408	0.122214	0.018096	-0.20667	2.20777	NaN	-0.324411	-1.29423	-0.37347	1.15057	0.262068	-0.18243	-0.935596	0.52869	-0.809154	-0.0675418	0.0026374	0.92952	-0.902579	-1.43777	28	-0.0851149	0.278694	-1.36557	-0.914236	-0.119483	-0.903643	-1.5197	1.29248	2.46878	0.27367	0.49294	-1.57523	1.31435	0.51799	0.0902204	NaN	0.569638	1.89193	-0.974406	-1.1259	-0.357554	-0.0426364	2.12718	0.236429
29	-1.98363	0.39398	-0.218227	-1.51574	-0.479427	-1.00597	1.71377	-0.459016	-0.468951	1.22808	-0.495942	1.35875	-1.39156	NaN	-0.593923	-0.703459	-1.65038	0.629463	1.28773	1.74218	0.747629	0.17524	-0.620368	-0.302196	29	-0.0452974	-1.58452	-0.883326	-1.43721	0.886604	-0.994294	-0.674365	0.589377	0.227613	-0.702892	-0.60858	-0.980104	0.43133	0.645569	-0.17701	-1.15906	-0.950606	-1.11547	0.366165	-0.0224939	0.165732	-0.0507819	0.868743	-0.171832
30	-0.32996	1.99168	0.730326	-0.499837	-0.192373	0.0491463	-0.425536	-1.65071	1.14389	-1.18843	-0.161049	-1.00164	0.103282	NaN	-0.65427	-1.1933	0.0305475	-0.577666	0.219266	1.69565	0.676187	NaN	-1.20533	0.0546381	30	-0.33699	NaN	-1.56986	-1.10063	-0.556746	0.634825	1.48437	-0.280914	0.737172	0.243515	-0.28156	0.0384344	0.360412	0.709383	0.00458878	-0.431768	1.02833	NaN	0.4183	0.304531	NaN	-0.370779	0.977092	0.728577
31	-1.06296	0.924036	0.332031	-0.264447	-0.500293	0.820071	-0.628224	-0.699879	0.871222	-1.33693	0.739792	1.48016	-1.64984	-1.49805	-1.64577	-1.01897	NaN	0.123569	1.20881	0.906432	0.525711	-1.40799	-0.893319	-1.82324	31	0.786416	0.338418	-0.296045	-1.0222	-0.659837	1.01385	-1.43256	-0.499003	1.23388	-1.70219	-1.32682	-0.760714	0.540631	1.04943	0.133428	NaN	-1.29577	1.2548	-0.753481	-1.60863	-0.125673	-0.241669	0.274716	-0.189437
32	-0.719822	0.737387	1.33557	1.53431	-0.24945	0.144544	-0.698048	-1.39548	1.92613	-1.9983	-0.228179	0.692339	0.0353324	-0.173891	0.483469	-0.138156	-0.473921	0.439053	-0.305304	1.51692	-0.0179793	NaN	-0.893768	-0.940909	32	-1.45408	-1.56001	-1.20189	-0.135683	-0.426429	0.137591	NaN	0.0862229	0.230027	-0.691322	-0.28051	NaN	1.34143	0.877688	0.320026	0.29403	-1.6421	-0.0080961	0.0961965	-1.73288	-0.0109895	-0.115986	-0.301413	0.952081
33	NaN	1.57217	-0.120003	0.367541	-0.00253984	1.03298	2.46542	0.351632	2.05882	-1.47563	-0.49876	-0.162105	-0.218137	-0.964153	-0.660887	-0.256541	-0.788117	-0.0246598	1.09097	1.07995	1.33856	1.24794	-0.286978	-0.594947	33	-0.760869	-0.367562	-1.23979	0.0568461	0.938812	-0.840217	-1.41472	1.17456	0.952174	-1.63484	-1.3814	-0.649781	1.11977	0.974616	-0.378002	-1.05145	-0.707684	0.124579	0.0328272	0.612225	-1.06055	0.0895684	0.717883	-0.0718532
34	-0.879273	-1.04791	0.799887	0.0448635	0.17424	-0.0663257	-0.229801	0.140782	2.57885	-1.38725	-0.4346	0.0262769	-1.72224	0.102325	0.7639	-0.0216642	-0.378684	-1.51318	0.555755	1.49626	0.885445	-0.744677	0.299548	0.0472472	34	-0.479034	0.781006	-0.221913	0.0271581	-1.00225	-0.794051	-1.15748	0.626	1.74778	-0.264648	-0.137546	-1.58766	1.29552	0.157175	0.26938	-0.125621	-0.351323	-0.947416	-0.752959	0.331379	0.534977	-1.3285	1.11649	1.75029
35	-0.716143	1.42386	0.61875	0.478044	1.22492	-0.498888	0.660332	1.27696	1.63621	-0.844917	0.762589	1.26674	-1.13835	-0.668715	0.30102	-0.19812	-0.940479	-0.465224	0.922824	0.405324	0.69705	0.72931	-1.32538	0.292063	35	-1.12443	-0.800075	-0.74354	-0.0850048	NaN	0.874804	-0.088077	1.24982	0.0784853	-0.698588	-1.43821	-1.85299	1.56153	0.0775452	-0.357938	-1.37736	NaN	-0.753149	0.227791	-1.93346	0.33163	0.476811	-1.39103	1.99251
36	-1.70337	2.24774	-0.164943	-0.559316	0.965697	-0.402311	-0.431845	-0.042023	2.03215	-0.678364	0.0541276	-0.239969	0.109467	-0.354164	0.139708	-0.00456555	-1.05894	-1.14426	0.745559	-0.466733	-0.383035	0.558445	-0.794616	0.456514	36	-0.233227	-0.404616	-0.207437	-0.613352	-0.73305	-0.704767	-1.53318	0.891266	0.555301	-1.28884	-0.150515	-1.5013	2.0917	-0.46187	1.08358	-1.27008	0.261963	NaN	-0.216169	-1.70393	0.493184	-0.736569	-0.273719	0.517595
37	-1.20511	-0.96718	-0.292101	-0.951969	0.16655	1.07716	0.326243	2.04028	0.768154	-0.377419	-0.168976	-1.21604	-0.752989	-1.1369	0.280122	-0.0285629	-0.863824	-0.351586	-0.151619	1.30668	0.178226	-1.20916	0.0456805	-0.901163	37	-0.684958	-0.729749	-0.319371	0.928534	-0.758505	-1.51963	-0.792246	0.631956	2.08052	0.621058	-1.38319	-0.615826	0.17351	0.712775	-0.245542	-0.25882	-0.00287219	-0.746618	-0.145644	-0.405758	-1.01867	-0.15268	-0.133227	-0.988334
38	-1.23785	2.74559	-0.302148	1.14596	0.447315	0.796737	-0.469126	-0.62532	0.568705	-0.777167	0.434617	1.45164	-1.37093	-1.78591	0.287464	-0.229143	-0.478146	0.147902	0.503954	1.31344	0.761942	-0.1337	0.855427	NaN	38	1.19672	0.316654	-0.296485	-0.0275665	-0.338419	-0.434884	-0.884327	-0.482605	0.153288	-0.208565	-1.96454	-1.30182	1.32586	-0.378757	-0.941999	-0.441408	0.26031	-0.203556	-0.873665	-1.35618	0.464706	-0.600053	0.825064	0.558859
39	-1.72676	-1.00161	0.602795	-1.10306	-0.211765	0.991939	0.544085	NaN	2.2835	-1.69694	-1.09217	-1.17295	-0.242032	0.582798	-0.0118234	-0.347435	0.575875	-0.500255	1.5404	2.2431	-0.429586	0.692068	-0.827783	-0.174206	39	-0.00665746	-0.953305	1.48454	NaN	-0.214892	-0.250627	-0.524916	-0.693659	-0.814808	0.60709	-0.227417	-0.633924	0.246059	-0.125956	0.348818	0.267638	-0.556388	2.157	-0.184534	-1.22285	0.333389	0.350069	-0.113598	0.521357
40	NaN	0.996045	0.564492	-1.84048	0.853841	-0.0378502	1.2667	-1.29111	-0.311974	0.382071	-0.0974187	-1.74884	-0.898371	-0.912625	-1.86528	0.147042	-0.21904	-0.475773	0.10115	0.996978	1.25067	0.0800396	-1.06597	1.80555	40	-0.456139	-0.52313	0.226058	-1.817	0.0615	-0.90538	-0.770741	-0.266703	0.0542383	0.111167	-0.0552046	-1.38433	1.44561	0.967118	0.545374	-0.491421	-0.3427	-1.51661	-1.03046	-0.972684	-1.73447	-0.381739	1.58579	0.632295
41	-0.493723	1.44678	1.07592	0.492687	0.406736	-0.337437	2.09017	0.641379	-0.566634	-0.358232	-0.0388835	-0.858149	0.339737	NaN	0.724058	-0.735226	-0.50873	0.206025	0.0156191	-0.0738603	0.472451	0.769629	-0.588442	-1.42384	41	-0.585896	0.00499924	1.47735	-1.59009	1.06234	-0.463625	-1.12035	-0.0197937	1.0997	-0.555568	0.582555	-1.75504	1.48688	0.00625334	0.698452	-0.714097	-1.06977	0.382679	-1.10756	-1.76505	0.382881	0.57731	0.555983	0.827353
42	0.0198341	-1.23755	0.691934	0.00199467	0.138426	1.04079	-0.113838	-1.15408	0.878361	-1.59425	-0.5234	0.954785	-0.402192	-1.05126	-0.0983038	0.579162	-0.938436	-0.391723	1.6369	-0.0347271	0.335263	1.16919	-1.81057	-0.496325	42	-0.336854	0.539691	0.507138	-1.48343	-1.54998	-0.877071	-1.55709	1.36403	-0.422741	0.335819	-1.97436	-1.98691	1.23437	-0.129192	-0.670849	-0.09136	0.12471	-0.778172	-0.172103	-1.2095	0.262967	0.389781	0.164848	0.052458
43	-0.212897	0.763031	0.736885	0.274054	0.943328	0.546554	1.19605	-1.38165	0.594775	-0.274562	0.345282	1.42776	0.15664	-0.619593	-1.76851	0.132646	-1.90499	-0.501293	1.21447	1.14242	0.154246	-0.700603	-0.927555	-1.81934	43	-1.25981	-0.0495851	0.488132	NaN	-0.683804	-1.6215	0.607732	0.616031	1.01347	0.0469558	-1.43841	-0.818014	1.58444	0.0362668	0.677891	0.0972078	0.0527061	1.36035	-0.788805	0.324529	0.391166	0.0428353	2.45337	1.33557
44	-1.94114	0.538021	0.653003	0.0644844	1.22419	1.66908	1.91756	0.31694	0.00988001	-1.26972	-0.272339	0.90893	-0.0652882	-0.238076	-0.708337	0.181959	-1.70593	NaN	-0.27085	0.307246	-0.0637582	1.82302	-1.20304	-1.04403	44	-0.091339	1.03967	-1.20109	-1.37819	-0.0393319	-1.14742	0.185507	2.11634	-0.246693	0.755706	-0.207906	-1.66566	1.96565	0.309427	0.743544	0.381222	0.792646	-1.96862	0.852137	-0.536741	-0.154922	1.23668	0.680288	1.40511
45	-1.10321	-0.208034	0.638413	-0.65214	0.535541	0.225286	-0.0343078	-0.504051	-0.00424628	-0.627311	-0.307793	0.634008	-1.09746	-1.08315	0.325754	0.341851	-0.376741	0.185382	-0.0108783	0.49062	0.439973	0.862757	-1.32972	-0.777996	45	1.75258	0.632555	0.374908	-1.15297	-0.297342	-1.45704	-0.793713	-0.260855	-0.286585	0.0667852	-0.942448	-1.28109	1.00311	0.415913	0.00280638	-0.931008	0.749191	-1.32935	0.398983	-0.433917	-0.144942	-0.496911	0.311077	-0.973838
46	-0.192969	1.47757	1.94248	0.103065	0.539873	2.05887	-0.31897	-0.135995	NaN	-1.31488	-1.47533	1.30402	0.171473	-0.113853	0.060723	0.287135	-1.40987	-0.61032	0.0721643	-0.292911	1.39565	-0.266646	-0.431827	-1.77336	46	0.421597	0.613851	0.0718848	-1.46609	-0.831028	0.497675	0.278948	1.20609	1.52482	0.0743126	0.284447	-0.450036	1.85712	-0.52121	0.14991	0.287101	-1.04239	0.17939	-0.502284	-1.38753	-0.250953	NaN	1.68099	0.299348
47	-1.44582	1.79997	0.42117	0.23545	-0.381833	1.15906	-1.22714	-0.587735	0.278532	-1.63501	-1.55719	0.855824	0.844948	-0.329627	-1.71623	0.337185	-0.0340169	-0.190235	-0.598565	0.678607	1.20526	1.51405	-0.512519	-0.593039	47	0.458083	0.836089	-0.202385	-0.542755	-0.917739	-1.59826	-1.72597	1.22148	1.91597	0.0699534	-1.37806	-0.794757	1.24477	-1.32544	0.552416	-0.69553	0.262427	-1.062	0.0395136	-0.266485	-0.10111	0.0782989	0.60589	0.156138
48	-1.48714	-0.956105	0.766417	2.61959	0.551085	1.63109	0.343009	1.86588	2.154	-0.358983	0.757442	-0.781849	0.114664	-1.96229	-0.078323	0.60403	-0.742004	-0.924997	0.485318	-0.55654	-0.0534474	0.819175	-0.364494	0.0157733	48	-0.512733	1.72414	-0.431133	-0.320052	-0.0356259	-0.453988	-0.185817	-1.98713	-0.0549857	0.443529	-1.22267	0.431874	0.125851	-0.282586	0.845934	1.82792	1.00255	-0.83295	0.301374	-0.371375	0.863878	0.279532	-0.304599	0.911579
49	-1.84305	1.21704	-0.962418	0.423994	0.546045	0.455729	0.994301	0.623169	0.850297	-0.687993	0.146866	-1.9154	1.11919	0.967201	-0.0137124	-0.187044	0.868092	-0.757368	0.448604	1.074	1.47434	-0.306181	0.265951	0.796913	49	-0.152583	1.59731	-1.23561	0.10057	NaN	-0.527204	-1.58078	-0.761524	-0.248933	-0.399518	-0.31625	-1.20664	1.33327	-0.344654	0.638013	2.35611	0.690534	-1.0387	-0.277867	-0.328848	0.265232	-0.203109	-0.0290698	0.414317
50	NaN	1.49629	-0.0976393	-1.85237	0.394814	0.559159	-0.661662	0.759379	1.92999	-1.54003	-1.16367	-0.317092	-0.953044	-0.901975	-0.713573	-0.496444	0.332862	-0.558206	0.215751	1.01196	0.044854	-0.094903	NaN	1.61987	50	0.393021	0.414843	-0.604783	-0.186657	-1.83076	-0.810745	-0.516922	0.0807176	-0.386045	0.241512	0.347095	-1.23205	1.90384	-0.113083	0.379254	0.225472	-1.84435	-0.991076	0.667096	-1.99903	-0.117534	-0.00443935	0.558797	-0.955311
51	0.684094	0.994232	0.476235	-0.0355317	-0.508438	-0.0763892	1.40826	1.08371	0.0391386	-1.18055	-1.02955	0.717569	0.217577	-1.23595	-0.972056	-0.14961	0.473611	0.466986	1.41225	0.448482	1.60021	-0.332547	1.05028	-0.871591	51	-0.949544	0.0721239	0.298434	-0.701093	0.374221	0.586775	-1.16341	-0.57869	-0.379815	-0.251349	0.573001	-0.948319	1.46222	-0.186389	0.828531	-0.877827	-0.159537	-1.7912	0.329338	-0.164301	-0.911413	-1.21156	-0.764286	0.152477
52	0.201441	1.3269	0.981238	-0.260657	0.357986	0.754689	-0.0548312	-1.78463	0.526459	-1.03996	0.224578	-1.15033	-0.0352487	NaN	-0.489316	-0.120829	-1.02265	1.48327	-0.425449	1.80707	0.502407	1.39659	0.0550664	-1.03893	52	-0.0145	-1.20784	-1.43119	1.3735	-1.17157	-1.37757	-0.926365	-0.192559	0.290052	0.160511	-0.375278	-1.58404	0.594635	-0.87677	0.853922	-1.22499	-1.18801	-0.995557	-1.02318	-0.34717	-1.03636	-0.994304	0.819566	0.144532
53	-0.767693	0.0994161	0.954499	-0.348991	0.272101	2.57215	1.09557	0.0686768	0.732717	-1.55225	-1.15469	1.64727	0.916826	-0.682201	-1.06111	-0.0907903	-1.24176	-0.539748	0.295795	0.0523752	2.01912	1.24184	-0.549317	1.34081	53	0.632171	-0.789865	-0.524095	0.417438	1.20916	0.561689	-0.603418	-0.159045	1.38338	1.00725	0.211898	-0.477963	1.17803	-0.677339	0.212557	1.16045	1.26957	-1.04376	-0.535792	-0.113851	-1.70269	-0.295646	-0.724511	0.111512
54	-1.91177	0.281528	0.0467644	0.55312	1.48364	-0.65208	0.751585	3.1928	0.613411	-0.529277	0.742884	0.0735051	-0.3066	0.534852	NaN	-0.229958	0.200381	NaN	0.605438	0.464334	1.27061	NaN	-0.946739	NaN	54	0.165995	NaN	0.76183	0.370121	-0.876784	-0.40137	0.207842	-1.06429	-0.567859	-0.227741	-0.522664	-1.66931	1.15254	0.182619	0.414453	-1.49939	1.48379	1.11257	-0.0806109	-0.336498	-1.33174	-0.187869	1.09985	0.683267
55	-0.196434	0.813479	0.805164	0.724477	1.10754	1.64965	0.778297	0.797901	0.81852	-0.266206	0.554187	-1.90446	-0.362447	0.631426	-0.477674	0.321521	1.76666	-0.241809	0.508088	0.0897455	0.671061	-0.432356	NaN	-1.33383	55	-1.92251	0.215114	0.773813	-0.382094	0.184324	-0.467077	0.515292	-0.472907	1.08338	1.04059	0.0798933	-1.15779	1.9685	-0.267799	0.0178792	-1.90946	-0.452008	-1.41368	-0.169759	0.00192956	-1.94092	-0.581151	0.981508	0.779274
56	-0.0863725	0.934811	-1.0507	0.75708	0.471191	-0.364522	1.31832	1.36176	0.56168	-0.619148	0.196541	1.4354	-1.40254	-1.41602	-1.03986	0.125523	-0.4279	-1.57551	0.00355201	1.76698	0.75011	-0.374056	-1.01602	-1.20542	56	0.534667	-0.369146	-1.50185	1.17162	-1.66107	0.464002	-0.468666	0.415356	-0.0854852	0.254829	0.985795	-1.494	0.702189	-0.528786	-0.328994	-1.17054	0.483238	-0.165629	-0.038194	-0.188745	-1.64872	NaN	1.65003	0.360503
57	-0.843817	-0.992737	-0.251605	1.59975	1.18693	2.23468	-0.622319	1.40676	0.0781819	-0.286404	0.114938	0.290788	NaN	-0.419462	-0.986408	0.093136	-0.729649	0.0578557	-0.105718	0.93277	0.810845	NaN	-1.4901	0.585006	57	0.147326	0.490636	0.0656905	-1.56253	-1.91368	-1.87079	-0.0980324	1.11646	0.106864	-0.0340595	-0.689212	-1.63841	1.62009	0.113304	0.759094	-0.796231	0.164194	0.0215534	-0.841031	-0.637806	-0.215832	-0.191399	-0.573726	-0.0149011
58	NaN	0.162164	-0.12694	0.838311	0.709449	0.700113	1.61112	-0.111982	0.373341	0.174552	1.52396	-1.50892	1.44232	-1.11392	NaN	-0.673493	0.659566	0.0964406	-0.0177922	-0.0839091	-0.62484	-0.891255	-0.227141	NaN	58	-0.640464	0.337307	0.955987	-0.869921	-1.00718	-0.465442	-0.759975	0.0629387	-1.17349	0.401424	-1.26004	-1.13171	0.431144	0.172598	-0.145298	-1.27457	-1.87683	-0.822379	0.427631	0.0854865	-0.359365	-0.523453	0.998458	0.476955
59	NaN	-0.53095	-0.745475	0.109948	0.261384	0.597215	-0.401283	0.272571	-0.265145	-0.661409	0.00775151	1.6497	0.152939	-1.61729	-0.0588969	-0.605643	0.40252	-0.52474	0.396408	-1.39309	0.329762	-0.239496	-0.970736	-1.94488	59	0.18236	-0.779437	-0.474215	-0.871229	-0.0572125	-0.15326	-1.77313	-0.392004	0.306528	-0.252562	-0.604563	-0.447256	0.938803	-0.371187	-0.292835	-0.709317	-1.10749	-0.30318	-0.508585	0.493071	-0.132016	0.105284	-0.673459	0.909171
60	-0.467299	0.214975	0.537108	2.46228	0.800245	1.50982	NaN	NaN	1.15828	-1.20856	-1.1853	-0.428513	-1.22219	0.516837	-0.95461	0.668079	2.0948	-0.120412	0.221957	-0.787807	1.10092	-0.719186	-0.0306064	-0.131743	60	NaN	0.119471	NaN	0.124079	-0.407899	2.61127	0.19677	0.792529	0.641122	-0.528677	-0.55889	NaN	-0.623368	0.547064	0.739287	-0.0398223	-0.330212	-0.687404	0.127134	0.388334	0.0098065	0.913399	0.181241	-0.414118
61	0.150874	0.128912	0.0435916	0.825594	0.913304	0.648667	-0.550371	-0.690226	0.909625	-1.0401	0.15017	-0.803376	-1.39409	-0.105924	-0.252193	-0.30387	0.290632	0.0485383	0.170099	1.04081	0.643717	-0.897069	-1.09943	-1.13795	61	0.0145494	-0.178651	-0.22662	-0.230998	-0.904308	-1.15806	-0.145787	-1.16022	-0.000447021	-0.419657	-0.595079	-0.309152	1.14221	0.485356	0.223667	1.51816	-0.172007	-1.77516	-0.243733	-1.28342	-1.42109	0.527395	-0.254912	2.14205
62	-1.67175	0.0296122	0.556371	1.03408	0.880973	0.157889	0.753423	-0.0151155	-0.215076	-0.27215	0.928917	1.08894	-1.41251	-1.18832	-0.582221	-0.0639134	1.11678	-0.307178	-0.0392315	0.783837	-0.693178	-0.843034	-0.336402	0.841859	62	0.652466	-0.221689	0.754515	-1.51796	0.209333	-0.100869	-0.714987	1.09034	-1.33145	0.372925	-1.08183	-0.455116	0.477829	0.485745	1.57853	-0.255074	-1.45918	0.36675	-0.745038	0.0206638	-0.0391943	0.029083	-0.18015	2.27644
63	-1.2689	-0.337974	0.0246062	-0.646614	0.923065	0.0740001	1.61004	1.49345	2.4592	-0.402567	-0.49983	-1.24091	-0.0394814	0.661506	-1.54491	1.59038	-1.21092	-0.447471	0.170868	0.402405	-0.203392	-0.129392	0.990609	0.0811341	63	2.05303	-0.00474494	0.282843	-0.553321	-1.96017	1.11106	0.997924	NaN	-0.470836	0.0456398	-1.36697	-0.364256	1.38302	-0.0786911	0.449796	-1.01574	-1.33934	-0.262077	0.596131	-0.797573	-0.00769348	0.930714	-0.246806	2.19258
64	-0.105856	0.115642	1.04849	-0.260754	1.32076	1.98054	-0.0144623	-0.772373	2.04519	-1.06087	0.375888	-1.92184	0.333251	NaN	-1.09233	0.00372381	0.625493	-0.733134	0.866015	0.55254	0.304049	-0.460052	-0.0716448	0.446797	64	0.778502	-0.305262	0.356564	-0.467266	0.175438	-0.314527	0.135596	-0.515026	1.46416	0.298587	-1.26695	-0.806858	0.23413	0.475749	-1.36621	-0.78563	1.53237	-1.42403	0.662399	0.656559	0.142579	-0.510991	0.0241063	0.902054
65	0.0518577	0.235449	0.82036	-0.882122	1.07284	-0.35852	0.506928	2.35516	2.92364	-0.093821	0.0346949	-1.01501	-0.208218	0.694795	0.406377	0.200181	-0.555131	-1.36663	-0.238597	1.17212	1.11494	0.44977	-0.222633	NaN	65	0.434172	0.439509	-0.720825	0.15563	-1.58435	0.47179	0.99112	1.12592	1.39136	1.36657	NaN	-0.576449	0.922347	0.640186	2.013	0.108505	-1.37402	NaN	0.301026	-0.972634	NaN	0.581936	0.240766	-0.628764
66	-1.49195	0.960637	0.756317	0.884107	2.09855	1.83149	0.941405	0.448989	0.997901	-0.72228	0.41064	-0.11129	0.513196	0.138233	-0.102912	0.548567	-0.461573	-0.664772	-0.239947	-0.196723	2.54319	1.20895	0.950238	-0.827656	66	0.176007	0.185621	0.56192	-0.583831	-0.723947	1.05019	-1.45027	-0.145178	-1.68432	0.351601	-1.42979	-0.488331	0.303482	-0.60918	0.11618	2.22833	-1.74549	-0.811782	-0.143257	-1.624	-0.198064	1.39453	0.570121	-0.00656022
67	-0.185068	0.478385	0.525311	-0.487731	-0.26883	1.01769	0.771944	1.48814	1.17268	-1.21033	-1.01886	-1.9569	0.16766	0.486465	NaN	-0.473941	0.860701	-0.207002	-0.277467	0.503445	0.658439	0.528621	-0.198268	0.690478	67	-0.0221556	1.02448	-0.350193	-0.741717	0.124988	0.00229897	-0.454455	1.97191	1.33041	0.734476	0.443205	-1.18586	0.502122	-0.0539093	0.129722	0.237956	-0.0613801	0.537266	-0.484745	-1.20924	-1.1527	-0.884697	-0.983726	0.587858
68	-0.129522	1.84707	0.633915	-0.38363	-0.318663	2.31062	-0.663005	0.994241	-0.850249	0.452088	-0.164913	-1.73101	0.372119	NaN	NaN	0.540309	1.08937	-0.243909	-0.535007	1.76961	0.276921	NaN	0.240259	0.957469	68	1.57218	-0.834056	-0.641954	1.08231	-0.0408197	-0.668044	1.14974	1.42226	1.64744	-0.933573	-0.581226	-0.232764	0.322156	0.182516	0.320197	-1.56633	-1.25465	-0.993745	-0.452913	-1.59285	-1.03487	1.30369	-0.205268	0.0234178
69	0.0104906	1.79123	0.945723	0.219509	0.940389	0.0217639	0.798003	-0.494772	0.400821	0.793497	0.0289057	0.502004	0.928896	0.22618	-1.25743	-0.0999767	0.0421932	0.482915	-0.283197	0.546294	-0.124645	-0.857756	-0.15505	0.376787	69	0.249401	0.549338	-0.203417	0.710133	1.02651	0.471941	-0.653171	-0.612758	1.26539	-0.460968	-0.174365	0.0944197	0.489095	-0.468924	0.411874	-0.797201	-0.660577	-1.00578	-0.387039	-0.299014	0.00915903	0.0784943	-0.307436	0.165839
70	-0.579772	0.997672	0.207703	-0.501537	1.54485	1.56271	0.195224	-1.32522	-1.57962	0.246236	-0.116686	0.945856	-0.175065	-1.48371	-1.6626	-0.0405852	0.727445	-1.1466	1.04538	0.170913	0.815526	0.255856	-1.89322	-1.59247	70	0.143762	0.0147034	0.871339	-1.25012	-1.12387	0.0708629	0.515431	-0.346701	0.0013832	-0.208208	0.24756	NaN	0.704972	0.954336	-0.427753	-1.83518	-0.105984	-0.857123	-1.17343	-1.36048	-0.131021	-1.1969	-0.511301	-0.509173
71	0.475684	-1.56376	1.37868	0.0994663	1.30115	0.298436	1.97951	0.070498	-0.676567	-0.566943	-0.816145	0.560005	0.265433	-0.51434	0.0364593	-0.340451	-1.74457	0.127136	0.555328	1.22049	0.845611	-0.485718	-0.852101	-0.165718	71	0.853563	-0.544636	-1.04399	1.2152	-0.61688	-0.747383	0.0648577	1.27795	0.967205	0.349241	-0.413434	-1.66517	0.397962	-0.0638484	-1.10132	-1.16447	0.974624	0.184233	0.241497	-0.613533	-0.0540046	0.452567	-0.688551	1.80225
72	-0.238258	0.405278	1.35013	0.0423215	2.06696	-0.075268	-0.574722	0.517842	0.588883	-0.997258	-0.0570695	-0.388192	-0.782043	-0.437577	-0.24711	-0.193737	-0.0677936	1.13038	-0.165205	0.832065	0.0711344	0.601145	1.58435	0.724498	72	-0.825302	-1.59413	0.172154	NaN	NaN	0.586787	-0.410658	-0.389158	0.688888	0.98171	-0.825825	0.0289047	0.382812	-0.411437	-0.564501	-0.308397	0.483567	-1.48616	0.278471	-0.32588	-0.689495	1.0663	-0.324217	-0.326181
73	-0.468998	1.01086	0.890763	-0.158314	-0.696662	0.336935	2.4687	-1.21808	-0.980595	0.172682	-0.0615878	1.65686	-0.982194	-1.00979	-0.176583	0.148634	0.0253473	-0.637333	-0.178884	-0.54335	0.0321981	-0.174188	0.133253	-1.89404	73	1.1241	-0.456628	0.994219	-0.283719	-1.12727	-0.57524	0.205926	0.021982	0.819646	-0.719212	-0.780201	-0.163182	0.331561	-0.297165	0.662939	0.596043	0.100998	0.163329	0.324747	-1.69032	-0.231375	-0.328242	0.531856	1.02048
74	-0.308911	-0.431045	-0.691776	1.47719	0.819359	0.395292	0.512557	0.147068	2.24466	0.780058	-0.256568	-0.934874	-0.263809	1.06444	-1.52247	1.10995	-0.74118	0.967259	-0.406671	0.576456	-0.0771569	-1.01497	-0.44704	-0.393484	74	1.35886	0.88989	-0.682476	-1.61376	-0.818273	0.785787	-0.249012	0.298079	0.0671397	-0.16005	-0.873718	-1.69242	1.09201	-0.288302	0.574903	-0.744822	-0.397448	-0.287924	-1.32126	-1.93029	-0.0395016	-1.22479	-0.66516	-0.0388779
75	-1.09892	0.132583	-0.37746	1.29619	1.18134	-1.31797	-0.163305	-0.313051	1.49825	0.618915	0.89588	1.24808	-1.12691	-1.31831	-1.9271	0.173043	-0.57075	0.406054	-0.680591	0.923009	0.487216	0.0183909	0.650718	0.78002	75	1.17003	0.58894	0.397995	NaN	-0.416961	0.743233	0.367571	1.06157	-0.985987	0.839479	-1.66664	-1.49601	1.14724	-0.655038	-0.457602	-0.377804	0.475073	0.404288	-0.638047	-0.588693	0.48054	-0.428543	0.440856	0.667589
76	0.0128032	0.00871461	0.961071	0.1774	0.688982	-0.621735	0.910025	1.6403	0.285198	-1.81463	0.964279	-1.99605	-0.549138	-0.174636	0.18118	1.27083	0.417289	-0.278261	-0.451475	0.635562	0.802879	-0.246528	-1.38855	-0.442736	76	-1.13118	-0.285593	-1.41496	-1.36214	-0.637547	0.38426	1.2965	2.10096	-0.99859	1.35611	-1.17142	-0.325201	0.55404	-0.00237029	-0.81247	-0.693404	-1.43956	-0.818214	0.484536	1.62898	0.661356	0.719062	0.415397	0.157022
77	-1.447	0.417592	0.456727	0.93014	1.42192	0.608446	0.746036	1.06165	0.617891	-0.831278	-0.0260385	1.379	0.700093	-1.61479	-0.46051	-0.298967	-0.478323	0.686729	-0.459118	0.634037	1.32423	-1.46519	0.942409	-0.147022	77	-0.229063	1.41065	0.29482	-1.83277	0.259728	-1.12577	-0.626782	1.51937	-0.576742	0.311149	-0.107765	0.152849	0.724093	0.17353	0.32714	-1.43728	0.370269	-0.198448	-0.873272	NaN	0.530153	-0.962078	1.13712	0.652981
78	-0.966773	1.53546	0.0892227	-0.416895	0.756457	0.27664	3.15703	-1.32646	0.511442	0.449672	0.161812	0.691751	-0.900093	-0.543673	-0.364014	0.208941	0.889585	0.911448	-0.218069	0.831842	0.627589	1.37968	-0.367709	-1.05411	78	0.150538	-0.810373	-0.882452	0.335324	NaN	0.913042	-0.950167	0.0710153	-0.417747	0.085656	-0.312847	-0.685323	0.810704	0.0545228	-0.884361	0.167136	-0.307513	-0.269293	0.147869	-0.0631154	-0.14502	0.666094	1.10529	-0.65239
79	-1.15019	-0.458609	-0.107389	-0.321121	0.939596	0.771555	-0.597943	1.73711	1.92795	0.0202916	0.827957	-0.547911	-1.4416	-0.743969	-0.569689	0.0752983	1.29888	-1.09317	-0.667413	0.147506	0.99745	2.87722	-1.78553	0.00916174	79	-0.192291	0.0825116	2.08305	-0.445427	NaN	0.0614259	0.724338	0.653367	2.40096	0.17149	-1.21726	-1.8032	0.537352	0.892162	-0.311729	0.302636	-0.436016	-1.23852	0.146293	-0.892997	-0.0516464	0.300623	-0.0399841	0.283881
80	-1.45605	1.15005	0.484489	-0.96237	0.0465356	-0.188836	0.7265	-0.681025	0.959753	-0.941626	0.393652	0.977412	-0.0479043	-0.386027	-0.0833531	0.616521	-0.255828	0.512927	0.771356	0.823533	0.183318	0.38921	0.435339	1.64473	80	-1.29444	-1.41298	0.192977	-1.40396	-1.28176	-0.0565467	0.831686	0.829328	-1.42512	-0.0965621	-1.17371	-1.46697	1.69433	0.0061776	1.13877	0.143634	-1.2227	-1.42344	1.00051	-0.0432394	0.137727	0.45318	0.833928	1.51721
81	-1.33594	0.419986	0.87024	-0.130739	0.771007	0.925633	-0.829719	NaN	0.435398	-1.06187	0.870852	0.809503	-0.99696	-0.165699	-0.145294	1.05085	0.579831	-0.275522	0.64819	-0.480574	1.03326	1.16944	NaN	1.36906	81	0.652345	-1.29119	-0.485189	-0.468753	-1.96838	0.176503	0.722301	1.5642	0.515392	-0.348241	-0.731614	-1.76276	0.319346	0.664284	0.703993	3.23669	-0.743061	0.972168	-0.306249	-1.5897	0.40733	-1.41741	-0.907118	1.07669
82	-1.04835	1.01907	1.91817	-0.684188	-0.703761	0.264882	-0.337178	0.264785	0.746352	0.69049	1.23131	0.252334	-0.847578	-0.972742	-1.79034	-0.508457	-0.06924	-0.877798	0.428133	1.75819	-0.0408015	0.232819	-0.437268	-0.428351	82	NaN	0.187397	-0.54313	0.743025	-0.67343	1.42032	-0.100216	0.960572	0.795167	1.45727	-1.81287	-1.28653	1.26797	0.274241	0.968599	-0.293608	-1.60783	-0.623374	-1.50408	-0.39582	-0.0071074	-0.865123	0.421872	-0.447981
83	-0.544899	-0.440299	0.10638	-0.45314	-0.00601458	-0.18474	1.25059	-1.32611	-0.103021	-0.639372	0.049296	0.0305174	-0.673669	-1.29962	-1.2786	0.334301	0.370013	-0.496065	-0.131066	0.980337	-0.109224	-0.243183	-0.34422	-0.731393	83	-1.84578	-0.214766	0.596489	0.0876643	-0.0976805	0.532852	-0.354738	0.173421	-0.198019	0.495465	-1.96819	NaN	0.377817	0.410901	0.0534387	-0.936413	0.29864	1.00824	-0.807827	-0.83335	-0.0808332	-0.362506	0.969587	-0.968725
84	-0.107277	1.31347	0.73639	0.908195	1.22027	0.463008	-0.199671	-0.748137	0.572572	-0.681766	1.58412	-0.463399	-0.302503	-0.465135	-0.869735	0.527863	0.383041	0.409063	-0.205197	0.22511	0.75869	0.899221	-0.117429	0.222294	84	-0.0839438	-0.493388	0.900294	0.301683	-0.329087	0.155399	1.81915	-0.559698	1.00774	-0.472547	-0.545624	NaN	0.544351	0.907361	0.814447	-0.306307	-1.5886	-1.39856	-1.51748	0.154277	-0.327189	-0.491382	1.06062	0.81879
85	-0.363593	1.24696	0.248422	0.501686	0.939236	1.28703	0.811077	0.92272	1.33896	0.283545	-0.927073	0.358239	2.4397	0.690697	-1.57326	0.0653615	0.931197	-0.120641	0.366532	0.901717	0.0793507	0.606277	NaN	-0.598136	85	-1.38384	-1.00563	0.37047	1.2608	-1.3974	0.503723	-0.393941	-0.137101	2.46218	0.153897	-1.00012	-1.81625	0.711252	0.258542	-1.45003	-0.156197	0.779791	0.967087	0.0581988	1.01255	0.181713	-1.77444	0.49717	-1.1567
86	-0.174488	1.45139	1.42798	-0.59242	1.29855	-0.0656382	1.62785	0.908805	1.86052	-1.389	0.719265	0.740583	0.354291	-1.08045	-1.51074	-0.0573545	-0.606263	-0.997018	-0.329839	-0.522868	0.862204	0.85124	-1.1695	NaN	86	-0.531182	-0.7261	0.74054	-0.797782	0.33589	1.10637	1.3079	0.0721182	-0.580742	-0.11613	-0.949453	-1.17744	1.3174	0.704103	0.578341	0.335488	-0.165934	-1.5576	-0.0179285	-1.55719	0.934909	-0.950692	-1.35029	1.00614
87	-0.599148	0.620879	1.18288	-0.457856	0.999055	1.32517	0.9443	0.322404	0.627665	0.00654103	0.0488646	0.409178	-1.55148	-1.73163	NaN	-0.635229	-0.66325	-0.269822	1.25351	-0.195602	0.149254	0.873145	-1.60339	1.24732	87	-0.550436	0.388375	1.25347	-1.22077	-0.377278	-0.610109	0.921089	1.0488	0.0973667	-0.367996	-0.640569	-0.383205	0.0549868	0.48533	-0.239679	-0.263436	-0.373787	-1.45734	-0.665384	-0.462089	-0.372267	0.760466	1.44988	1.13993
88	-1.03834	1.20062	0.856697	1.90325	-0.314664	-0.0838019	1.40445	1.77729	-0.438739	0.299357	0.861272	0.665126	-0.260398	-1.84346	-0.219907	0.814021	-0.0500018	-0.324802	0.0900841	0.747176	0.115246	0.401595	0.410278	0.942391	88	-0.580064	-0.331413	0.215526	-1.54692	-0.0676946	2.06388	-0.902128	-0.81375	-0.276462	-0.575078	-0.65542	-0.510382	0.643784	0.187097	-0.442294	2.47897	-0.0311439	-0.0888331	0.363194	-1.2392	0.109698	-0.904014	-0.0548601	-0.505085
89	-1.36037	0.965433	0.758356	0.646615	1.07927	-0.350934	1.73517	0.456594	-0.189425	-0.668321	-0.0857991	-0.911132	-0.321449	NaN	NaN	0.220984	0.284131	-0.643706	0.726701	0.201636	0.207687	-0.871341	0.0617728	0.0661106	89	-0.907497	1.00002	-1.63643	-0.275226	-1.46417	2.4302	-0.673763	1.22247	-0.469578	0.245202	0.0278664	-1.66403	1.19449	0.374527	-0.514135	1.3625	-0.518313	-1.15338	0.835748	-0.995279	-0.704473	-1.73958	0.530891	1.63979
90	-0.417156	1.2366	0.564188	-1.0883	0.00917278	0.791803	0.189345	-1.59384	2.10997	0.664611	-0.144025	1.49419	1.05162	NaN	NaN	0.80154	-0.320669	0.752122	-1.03227	1.25608	0.568014	2.14544	1.06497	NaN	90	-1.08829	-1.20458	-0.106457	-1.13391	-1.92671	-1.91834	-1.07293	-1.57663	-0.829064	0.691009	-0.557647	-0.611239	0.601677	0.561753	-0.124083	-1.98623	0.313258	NaN	-0.370816	-1.80729	1.27483	-0.207887	0.998592	-0.523368
91	-0.0993986	1.70631	-0.172615	1.49569	1.04219	0.0978999	-0.741715	-0.45615	1.8435	1.05921	0.900863	-0.818858	-0.746784	NaN	0.758084	-0.106691	1.11873	0.0519421	-0.0627044	-0.885456	0.501354	-0.54165	-0.0511821	0.852363	91	-0.483322	0.422701	2.07716	0.496205	-1.60955	-0.991449	-1.18412	0.775285	0.0880203	-0.3307	0.016395	0.588225	0.719653	-0.592775	-0.883441	1.10294	-0.953998	NaN	-0.126986	-0.756833	0.246513	0.75694	-0.500557	-1.51086
92	0.225275	0.698048	0.567705	-0.481503	1.67927	0.341945	-0.692874	-1.13874	-0.452269	-0.666167	0.695607	0.61588	0.641704	1.1878	-1.22384	-0.413509	0.68809	-0.417039	0.704872	-0.751348	1.17618	0.796925	-0.805813	-1.74897	92	0.346283	-0.0661179	0.786488	-0.750261	-1.78147	-1.37166	0.531075	0.780725	-0.280501	0.11822	0.399241	-0.692952	0.964508	-0.131995	-0.462606	-1.36269	-0.527175	-0.104847	0.404934	-0.668935	-0.657154	-0.437462	1.91438	-1.47861
93	-0.0857832	2.12269	-0.467597	0.165972	0.905441	0.721993	0.462957	-1.01577	1.14296	-0.0665747	-0.481838	0.284243	0.349904	-1.24804	-1.25831	-0.13413	-1.17513	0.285487	1.61283	-0.144707	1.72141	2.03883	-1.18664	-0.730025	93	-0.188058	-1.48944	2.02286	-1.41501	-1.65487	-1.44035	0.0120127	0.202802	-0.0743793	1.01376	0.157793	0.681922	-0.0761191	-0.208413	-0.86093	1.19363	0.974515	-0.451836	-0.421708	-0.336736	-0.74502	0.979314	2.3955	0.223656
94	-0.404591	0.062802	-0.392769	1.19211	0.543112	1.24152	-0.617993	-0.468398	1.25293	0.271639	0.240849	-0.536676	-0.42153	-0.912439	-1.17361	-0.0579168	-0.966024	0.738403	0.0582325	0.45555	0.14353	-0.684257	NaN	0.25548	94	-1.21126	0.773245	2.30827	0.741656	-0.152404	NaN	-0.125692	-0.387679	-0.224748	0.0196831	-0.352269	-1.75176	-0.0664371	-0.398059	0.265152	-0.708914	-0.0146906	-1.24118	0.564793	1.02686	-0.788388	0.622	1.06329	2.68623
95	-0.85607	0.98426	-0.147165	0.307806	0.681545	0.0471083	-1.14224	-0.504171	0.824517	-0.562267	NaN	NaN	-0.214878	-0.446172	-0.846073	0.551678	0.245566	-0.102787	0.940243	0.146172	0.417877	-0.928906	-0.682306	-0.522943	95	-0.0706665	1.36521	1.04583	-0.92765	-1.00632	NaN	0.0641782	1.52447	1.65648	-0.473303	-0.45079	-1.25208	1.04834	-0.593879	-1.23809	-0.81141	1.0996	-1.43197	-0.25238	-0.634195	-0.996944	0.73186	0.27451	0.90558
96	-0.745076	0.695903	-0.304601	0.541264	-0.697813	0.785212	2.19046	0.577845	1.70572	-0.619268	-0.375462	0.185099	0.396714	1.46376	-0.116983	0.37931	-0.337175	-0.023006	1.46816	0.631208	0.579265	-0.969425	-1.48049	1.05624	96	0.0274698	1.91983	0.658932	0.788559	0.0689525	-1.90661	-0.180018	0.68073	0.378801	-0.542344	-0.61549	-0.463936	0.914793	0.815202	-0.611466	-0.198092	NaN	-0.352739	-0.00291908	-1.03797	0.74667	-0.886775	0.905359	-0.783603
97	0.216173	1.0575	0.908443	-0.85046	0.377045	0.800713	-0.692867	-0.37406	0.748985	-0.973041	-0.49484	1.32598	0.0799876	-0.718401	-0.469286	-0.0980305	-0.104199	-0.323574	0.906486	0.387502	0.389987	-1.42973	-0.737165	0.409674	97	NaN	2.90142	0.510191	0.275007	0.840171	-1.71019	-0.845398	0.914726	2.19966	-0.00680613	-0.398236	-0.503529	0.312558	-0.477019	0.528365	0.508712	0.245055	-0.753208	0.4751	-1.29175	-0.770689	NaN	-0.517031	NaN
98	0.792095	0.497925	1.61579	0.158058	0.793491	1.69342	0.845245	-0.614441	0.895312	-0.433324	0.479265	-0.108514	-1.25766	NaN	-1.26804	-0.296578	0.838638	1.59189	0.0425031	0.0270363	0.275106	-1.19525	-0.660001	1.44327	98	0.983113	-0.693895	0.00665752	1.37986	0.771624	-1.04869	-0.918529	1.17409	0.0515492	0.187445	0.241602	-0.47415	0.858191	-1.37783	0.783262	1.43063	0.780679	-1.35033	1.22327	-0.391729	0.643788	-1.12673	-0.661817	-1.52235
99	-0.194079	1.75053	0.699074	0.0238049	1.51254	1.7608	0.75732	1.66753	1.92883	-0.667372	-0.753389	0.236584	0.21953	0.841384	-0.516671	-0.120221	0.63927	0.149626	0.281969	1.39267	1.1855	-0.289074	-0.125016	2.08222	99	-0.581177	-0.303313	0.572112	-1.15403	-1.69404	-1.01056	-0.074123	-0.848056	0.316116	-0.804341	0.252886	-0.899631	0.998417	0.126526	1.28548	-0.0552419	1.02302	0.466585	-0.0543259	0.792881	-0.255965	-0.734725	-0.924302	-0.482596
100	-0.267912	1.72268	1.27641	-0.423414	0.11458	2.46823	0.149587	0.620091	1.05379	0.946365	-0.365304	-0.375781	-0.459716	-0.441826	-0.0158972	-0.306619	-0.919776	0.844473	1.01199	0.455206	0.780442	-0.313899	-0.720194	-0.187805	100	0.562322	1.34232	0.398003	NaN	1.70672	-1.96544	-0.489862	1.73758	1.66035	-1.43085	-1.16681	-0.566617	0.0212543	0.288342	-0.295018	1.07939	-0.188727	0.913199	-0.91342	0.671999	-0.693412	-0.227396	0.788692	0.899176
101	0.994073	-0.224062	0.0431474	0.180715	1.74593	0.4407	2.02073	0.0371043	-0.333704	-0.42794	0.540812	-0.267958	0.720792	-0.865691	NaN	-0.097946	-0.943327	-0.796763	-0.20247	-0.762267	0.745025	-0.194454	NaN	-0.159898	101	-0.652076	0.956051	-0.490165	-0.978893	0.943099	-0.676365	0.341647	0.699802	-1.07764	-0.0277928	-1.13745	-0.383749	0.0516355	0.0129859	0.0389116	0.813924	1.08268	0.196649	-0.324584	0.173143	1.36385	0.204789	0.0766494	0.305167
102	0.319073	0.698001	1.18572	-0.323171	1.14611	1.61787	-0.599248	0.312584	-0.0369369	-0.487821	1.39359	-0.31883	0.156345	NaN	-0.273249	0.287415	0.619368	1.35869	0.79581	0.91024	0.287495	0.234095	0.408119	0.966572	102	-1.08537	0.567448	0.999792	-0.227916	NaN	1.20528	0.199131	0.171333	1.92174	-0.213526	0.177187	-0.327877	-0.0702773	0.369447	0.341511	-0.147038	-0.0172524	-0.102633	-0.507631	-0.812711	0.328499	-0.623183	-0.423283	-0.21181
103	1.09548	0.71237	0.761057	0.502975	0.927704	0.357832	0.579709	3.0073	0.695321	0.183763	1.40641	0.213039	0.713018	0.913084	-1.59253	0.109256	-0.536527	-0.566355	-0.477455	0.388457	-0.0347502	-0.663233	0.817779	0.813899	103	-1.33661	0.188908	-0.393814	-0.239092	0.0188544	-0.881378	0.924253	0.926879	0.827243	0.868097	-0.441182	NaN	1.07232	0.685061	-0.165694	1.49901	0.0524088	-1.17261	2.14573	1.21239	-0.734023	-0.408627	0.985785	-1.24435
104	0.246702	0.219541	0.859734	0.180145	2.08512	0.861686	1.6101	-1.32269	-0.0742267	-0.389055	-0.0153487	2.10504	-0.750574	-0.169373	-0.558751	-0.099465	0.0264837	-0.245313	0.0165512	0.603426	-0.492808	-0.525092	0.443077	0.718631	104	-0.47543	0.255929	-1.80665	0.782308	-0.158694	-0.671792	1.70646	-1.31829	1.48174	-0.663812	-0.403724	-1.03442	1.01702	-0.615015	0.20736	-0.254612	-0.246719	0.269953	0.157864	NaN	-0.516061	-1.65538	1.12159	-0.0825708
105	1.35848	0.621707	0.0491758	0.914249	1.89635	0.120523	-0.0143051	-1.86129	2.65149	-0.371844	-0.205791	0.136789	-0.77789	-1.1578	-1.18374	0.44231	1.03597	-0.0253176	1.7397	-0.0572008	-0.377276	-1.74658	0.965585	1.15986	105	0.0503723	-0.641012	-1.67627	1.98362	0.521458	-1.49688	0.589307	NaN	1.26385	0.592773	-1.02357	NaN	0.664421	1.19248	-0.0340455	1.01924	-1.09519	-0.0299823	0.0541284	-0.460331	-0.148127	1.0786	0.471485	0.458839
106	0.832344	0.961843	0.569583	0.664944	0.99672	0.782976	0.223068	-0.558702	1.02357	0.473723	-1.51224	0.0421629	0.760751	-1.5632	-0.760419	0.0267813	-0.253822	-0.243448	-0.861202	-0.309894	1.06159	-1.49451	0.202784	0.60832	106	-0.173439	-0.0680119	1.30492	-0.495251	0.536769	-1.54477	0.866898	NaN	1.14047	-0.170792	-1.78776	0.196046	1.86262	1.23558	0.0887057	0.246728	1.23978	1.54653	0.358293	0.727458	-0.327346	-0.193909	1.60755	1.50913
107	0.625556	2.44349	0.387529	-0.90212	-0.965421	1.68269	0.367414	0.534912	-1.99889	-1.38669	0.276239	-0.277362	0.846389	0.0359855	-1.05199	-0.287132	-0.283562	-0.718761	0.00675334	0.26596	-0.00381632	0.461657	-0.665936	-1.62751	107	-1.66343	-0.0596707	0.258079	-0.681815	0.793522	0.402303	-0.871273	-0.00705169	1.84234	1.35906	-0.550066	-1.5663	0.475572	0.662856	-0.159357	-1.73928	-1.576	0.0347668	-0.275257	-0.69734	0.106018	-0.702263	0.343141	-0.554146
108	-0.59059	-0.302464	0.513932	-1.88515	0.781892	0.0258979	0.766878	-1.74468	-1.2219	-0.98971	0.0600692	-0.553983	-1.08612	-0.992217	0.0058381	0.351485	0.117192	0.723713	-0.146482	0.770002	1.11644	-0.769371	-1.32304	-1.2487	108	0.23487	0.0367519	1.24648	0.72653	0.805059	-0.0625376	0.35618	-0.809241	1.93915	-0.410219	-0.821196	-1.39548	1.41815	-0.378117	-1.84119	1.55768	0.875704	-1.40154	-1.75689	0.120559	-1.88527	-0.162636	-0.43425	-0.317124
109	-1.01397	1.02465	0.578392	-0.213058	1.27177	1.74057	0.769574	0.540913	0.100551	-0.895398	0.454926	-1.26735	1.26455	-0.647707	-0.268656	0.0117752	2.38984	-0.407056	0.75644	-0.35104	-0.310162	0.713443	-0.849352	-0.914495	109	-0.776734	0.822359	1.59986	0.677835	0.200839	0.725976	1.76649	-1.80233	1.52518	-0.692083	-0.525101	-0.794073	0.653123	-0.02088	0.21527	-1.21176	0.52585	-0.912527	-0.214379	NaN	0.235338	NaN	1.11069	-1.35765
110	1.02785	1.23028	1.66241	-0.362152	1.38986	1.56893	0.032131	0.115248	0.675735	-0.953912	-1.47221	-1.08551	0.584676	-1.02013	-0.51208	-0.342052	1.11663	-0.73502	0.347721	1.08901	1.18965	1.48302	-0.966692	-0.620738	110	-0.779074	1.24834	-0.911274	0.474942	1.76094	-0.916171	0.716687	0.438161	1.37655	0.282911	0.0911107	-1.81981	1.48406	-0.401216	-0.60083	-1.34282	0.841946	0.875193	1.01587	0.460986	0.106489	-0.0622673	1.71866	-1.58635
111	-1.93952	0.166279	-0.394356	-0.294504	2.09755	-0.364563	1.06255	2.19418	-0.0230365	0.859801	1.2937	0.352395	-0.503011	-0.587124	0.0878848	1.32588	1.34382	0.436278	1.58682	0.612813	2.49193	0.992107	0.222843	2.36704	111	0.580761	0.111022	-0.909909	-1.17102	1.20269	-1.07041	-0.423467	-1.51225	0.612253	0.77589	1.15728	-0.730592	0.63119	0.187952	-0.0304456	1.24647	NaN	-1.83137	-1.06785	-0.136431	-0.2541	0.671877	0.628058	-1.46054
112	0.498524	-0.376982	-0.439608	-0.876872	3.33231	1.08794	2.48781	-0.237581	0.00557628	1.22755	NaN	0.848703	-1.06878	0.0718574	2.16094	0.241965	-0.0362073	0.449055	0.681299	0.309475	0.948196	-0.788413	-0.794703	-1.86481	112	1.00959	0.5483	-0.487315	-1.26834	0.92764	0.72377	-0.724839	-0.23243	-0.137531	0.705723	0.328265	-0.519105	0.198384	-0.204452	-0.597473	0.17643	-1.34761	0.223762	-0.672598	-1.15104	0.309912	-0.780211	1.48627	-0.521484
113	-1.12809	0.196069	0.195259	0.216756	1.18633	1.66679	0.080357	0.459929	-1.78968	0.08501	-1.27471	2.47604	-1.5013	0.11127	-1.03361	0.107922	-1.32946	0.398209	0.304055	0.331898	1.06536	0.787833	NaN	-0.468932	113	-0.444596	0.112702	NaN	-1.21083	1.38278	-0.0458814	2.08697	0.654983	-0.498479	0.621894	0.153467	-1.57026	0.885392	0.260391	-0.186517	0.265487	-0.282435	-0.000313036	-0.49947	-1.8998	-0.162698	0.660266	1.54513	-0.219949
114	-0.845616	1.01739	0.333802	-0.403424	-1.80348	1.39543	-0.495074	0.645426	0.818664	0.482797	NaN	-0.693021	-0.638226	-0.555386	0.662233	0.0049935	0.778737	0.211751	0.314464	1.03772	0.48336	-0.382307	NaN	0.589141	114	-1.09315	2.02028	-0.615678	-1.70053	-0.16428	1.13301	1.62393	-0.903187	-0.666861	-0.168019	-0.98342	NaN	0.829716	-0.776586	0.0369368	-1.50581	-0.99748	2.06264	-0.2513	-0.724194	-1.15656	-0.398788	0.987907	0.121754
115	-0.834212	0.893284	-0.215823	-1.05724	1.30652	0.181205	0.462213	0.164114	1.21506	0.226619	0.710603	-0.175875	0.936361	-0.00965025	-0.561603	-0.385575	-0.482626	-0.0397297	0.931774	0.770272	-0.543515	-1.25222	-0.207916	-0.652737	115	0.892235	0.965887	NaN	-0.36117	-0.319768	0.0461308	0.40075	0.255235	0.904587	1.22468	0.331808	-1.86524	0.0303576	0.487676	-1.30886	NaN	2.04821	-0.708197	1.23041	-1.28721	-0.0378039	-1.01846	0.157192	0.107497
116	-0.0672238	2.07677	1.19643	0.789207	0.938881	2.06368	0.503727	-0.835975	0.102735	-0.24515	-0.375761	-1.23352	-0.529842	-0.846222	NaN	0.295377	-0.530392	1.59767	1.33551	-0.940597	-0.159193	0.291142	NaN	-0.942188	116	0.722845	2.00207	-0.200213	-0.841155	-1.41718	0.244898	0.942763	-0.124761	0.249502	1.04768	0.966859	-1.35006	-0.868439	-0.45334	0.758067	0.568905	-0.234895	-0.933273	-0.45381	0.759524	-0.880307	0.500997	0.68982	0.419582
117	1.51404	1.41051	0.123488	0.824976	0.820687	0.280325	0.0811943	-0.18723	1.2507	-1.19727	-0.993681	1.09609	0.430692	-0.212941	-0.452736	1.03866	-0.0573134	0.265464	-0.0485247	0.284019	-0.188325	0.043626	NaN	0.0457534	117	0.717546	0.846397	-1.33288	-0.280232	-1.4176	0.5234	0.829118	-0.125361	0.507862	0.516152	-0.606031	-0.197867	1.16169	0.989495	0.172021	1.11778	-1.01752	1.29601	0.911787	-0.442815	0.0215106	0.131243	0.602577	1.62446
118	0.16031	1.32859	1.11318	1.36216	1.39849	0.61986	0.108828	-1.44427	1.74827	0.0312565	-0.597865	0.713349	-0.519443	-0.137301	2.475	1.36147	-0.807818	-1.24393	0.131303	1.21086	0.0774469	0.240902	0.488683	-0.245924	118	-0.296104	1.24786	NaN	-1.71991	0.214445	-0.142789	-0.805221	-0.625352	1.53231	1.00133	-0.372234	-1.06344	0.290633	1.1464	-0.641028	-0.769995	-0.606272	1.23696	0.502527	-1.35002	0.564702	0.961258	0.473458	-1.03748
119	1.16109	1.18681	-0.580383	2.38474	1.49551	1.68332	0.990517	-0.20377	-0.215009	-0.243529	-0.886807	0.0192582	1.02674	-0.437166	0.829624	0.224094	0.3627	0.613766	0.0737326	0.113517	-0.618764	-0.671213	0.6349	0.493436	119	NaN	1.51651	-0.0413937	0.626573	0.468101	0.931858	-0.494035	-1.51159	-0.410107	-0.146481	0.00817925	-0.641814	-0.149528	0.520395	-0.929324	1.08981	0.36197	1.88509	0.679541	-0.201484	-1.45414	-0.0778896	0.323694	-1.75214
120	-1.38332	-0.775836	-0.0249958	1.38695	1.1825	-0.0371065	1.16322	-1.31901	0.13269	-1.45763	-1.28085	0.437439	-0.573693	-1.63496	0.171946	0.278318	-0.108314	-0.307594	0.42342	0.170006	-0.0450404	-0.232513	-1.07934	1.02504	120	0.562834	-1.32418	-0.0325098	-0.698546	-0.489146	1.8207	1.53246	0.52848	1.47813	0.484688	-0.42991	-0.25086	0.972169	-1.33309	0.315711	0.929396	-1.75448	1.50442	0.439172	-0.584222	-0.121673	0.442258	0.125083	1.67523
121	-1.61367	0.26952	-0.172629	-0.293568	0.831573	-0.518011	-1.91276	0.291215	0.271576	-0.0930724	NaN	-0.681314	-0.188706	-1.81269	-1.07324	0.605076	-1.14913	1.16482	0.542631	-0.450314	0.0574941	1.70243	0.377649	1.76026	121	0.511523	1.52953	0.303656	0.248426	0.460067	1.40303	0.425126	1.62821	-0.422829	2.28719	-0.318498	-0.587059	0.449318	-0.39159	0.0762833	0.323649	-0.223857	-0.301711	0.600463	-0.872199	0.72389	0.636343	0.272587	1.17146
122	0.203687	-0.390826	0.920223	-0.503205	-0.486201	-1.52284	0.866028	1.24646	1.36436	-0.888621	-1.19907	1.88062	-0.0325522	-1.00622	-1.26486	0.960816	-1.25307	0.502347	0.0212113	-0.667945	0.544844	1.2098	-0.207682	-0.484632	122	-1.57565	0.645231	0.255059	-0.223265	0.191939	0.627754	0.0962122	0.871647	0.337991	-0.188594	-0.639558	-0.472215	0.648534	-0.375089	1.22075	-0.0939088	-0.440895	-1.32115	-0.019767	-1.09551	0.0438626	-0.140924	0.118111	-0.52316
123	-0.379032	-0.635026	0.469748	-1.31957	0.87007	-1.63992	0.895314	0.479081	2.1885	1.14423	0.98636	-1.22274	0.289578	-0.499448	-0.539967	0.936655	-1.02868	-0.148869	1.60845	-0.201498	0.352432	1.30899	-1.47926	-0.0986279	123	0.905221	-0.792254	0.634084	0.163621	1.46669	1.11865	1.75145	-0.26684	-0.397063	-0.590486	-0.499548	-0.79262	0.399077	0.35638	0.227221	-1.00412	0.157721	0.592149	0.782549	1.205	-1.08922	0.935085	-0.332937	1.1422
124	-0.781814	0.819484	0.789677	-1.64269	3.35628	0.381033	-0.633326	-0.616595	-0.162231	-0.48387	0.42118	0.410953	-0.18329	-0.468902	-0.92215	-0.654483	0.348131	1.1858	0.682561	-0.270538	0.348472	-0.408423	-0.381237	0.105889	124	-1.93126	1.57391	-0.665661	1.16118	-0.251518	NaN	-0.335392	0.319632	-1.17976	-0.384974	1.36347	-0.109687	-0.151638	-0.362154	0.935627	-0.00818125	-0.651441	-1.01819	-1.5562	-0.906756	-0.657791	0.317933	0.201259	-0.601353
125	0.390098	0.496372	0.449105	-1.18655	1.08651	-1.03602	0.0860278	0.0783369	1.5967	-0.0899371	0.182462	0.468583	-0.39225	-1.69599	-0.325863	-0.18959	0.103574	1.061	0.188157	-0.275146	1.39567	0.155232	-1.01945	-0.681767	125	-0.537203	-1.70096	0.685752	-0.107688	1.44592	-1.39338	0.833345	0.520394	0.22286	1.54804	0.000530548	-1.69989	0.223382	0.252961	-0.132042	-0.245393	NaN	1.45872	0.723009	-1.45374	-0.923434	-0.619531	0.0797334	-0.185786
126	-1.46007	0.443277	-0.48765	1.0934	0.394295	2.75591	-0.346114	0.948501	0.872303	-0.314916	-0.231446	-0.950358	-0.900733	-0.189978	-1.87243	0.180475	-0.410529	0.546916	-0.444873	-0.413047	-0.516242	0.999079	NaN	2.1777	126	-0.80384	0.813723	-0.394946	1.56467	-1.20951	NaN	0.969984	-0.114181	-0.812055	1.47132	0.302847	-0.588374	0.693035	-0.478879	-0.0895602	-1.76425	-0.403799	1.77608	-0.167496	-0.4555	-0.437255	0.0154116	0.208888	0.967072
127	-1.84532	-0.472337	-0.0994447	-0.703013	1.41208	-1.76637	1.21237	2.03722	-1.16779	0.0856736	-0.0596674	0.295643	-1.49115	0.338055	NaN	0.313987	-1.29768	0.778808	0.574984	0.52417	-0.0774571	0.396085	-0.114838	-1.01885	127	0.572863	-0.132844	-0.226689	NaN	-0.452858	-0.103542	0.0822661	-1.16527	0.00509465	1.38369	1.05369	-1.92143	-0.0613551	-1.30125	0.30875	0.0282863	0.562731	0.610595	0.798905	1.36511	-0.371257	0.852829	-0.305424	0.796565
128	-0.473456	-0.72437	-0.914785	-0.909279	1.02415	0.400309	0.382027	-1.78613	0.651952	-0.591188	-1.58144	-1.19289	0.897513	0.617116	-1.1779	0.0944587	0.349547	0.733247	0.0233506	0.406274	-0.0659744	1.19078	1.4898	-1.68853	128	1.54564	-1.46741	2.63824	-0.477718	-0.361994	-0.734271	0.39937	-0.212263	-0.692865	0.0544932	-0.565347	NaN	1.07688	0.345884	0.735196	NaN	-0.569155	0.280741	-0.251154	-0.197668	-0.0715301	-0.20265	0.83507	1.42296
129	-0.712478	1.37308	0.51	-0.981186	2.46662	-0.0938629	-1.67931	-0.14504	-0.415769	-0.55834	NaN	-1.39818	-1.45142	NaN	-0.522807	0.574244	-0.608361	1.65496	0.264491	0.271077	0.754925	0.0263257	-1.22602	-0.731699	129	1.11885	-0.74576	-0.739615	-1.46727	0.914764	-0.350004	0.0966081	-0.0522894	2.04418	0.549872	-0.0260056	-0.50573	0.0682021	0.21457	-0.289892	-0.085992	-0.937492	-0.166268	0.124668	0.55466	-1.48935	0.182779	-0.393341	-0.0135343
130	0.243765	-0.60624	0.377713	-0.307174	-0.520936	-0.534606	2.25785	-1.03825	1.28585	-0.703371	NaN	-0.634351	-1.64261	-0.460755	-0.147927	0.227536	-0.133308	0.915999	1.05799	-0.195036	1.28239	2.03666	0.488255	-1.29089	130	1.74365	-0.765134	-0.713967	-1.19117	-0.532806	-1.24107	-0.868999	0.185834	0.134679	1.14271	0.725357	-1.19827	0.0650721	-0.0385621	0.624622	1.89667	-0.216594	0.139736	0.483966	0.217395	-0.585197	-0.814458	1.15786	0.129224
131	-1.5331	0.0425808	-0.333301	0.299826	0.0740172	0.631069	0.968073	1.33536	0.624703	0.614052	-1.64207	-0.0790476	-0.702038	-1.80429	-0.498535	-1.02075	0.212411	-0.365597	0.863796	0.675901	-0.094201	0.521351	-0.46736	-1.07813	131	-0.220871	1.9021	-1.04346	0.856431	0.397674	-0.849992	1.01262	0.743642	0.506572	0.196192	0.70771	-0.382869	-0.0568154	-0.227399	-0.125142	-0.533431	-0.625692	-0.328177	-0.0659202	0.259947	0.192602	0.212379	-0.226163	0.0823902
132	-1.26325	0.0368243	0.804602	-0.346402	0.434715	1.65299	1.8081	2.96492	0.958694	0.019185	0.806898	-0.957405	-0.0335595	0.70191	0.0801511	0.327007	-0.579945	-0.279886	0.700785	-0.753881	0.217871	1.0247	-0.414903	-0.363746	132	0.650189	-0.124539	1.24535	-0.615009	0.98772	-0.496048	-1.38042	-1.66882	-1.64514	-0.11882	0.0516194	-1.9255	0.0960391	0.466347	-1.48592	0.00477987	-0.498414	-1.6998	0.0702246	NaN	0.168719	-0.0105087	-0.152291	0.610985
133	-0.615889	0.26521	0.974785	0.594729	-0.387588	1.06311	-1.20897	-1.86351	1.35103	-0.199352	-0.840211	-0.607336	0.330017	-0.254483	NaN	0.721192	0.08877	0.2359	-0.172564	-1.21416	0.782073	0.666525	-0.604873	-1.45872	133	-0.0195679	1.00471	0.709784	-1.00065	1.19432	-0.33103	0.505679	0.478246	-0.922745	0.46219	-1.74605	-1.22231	0.483668	0.064856	-0.793292	NaN	-0.819211	2.3177	-0.911763	-0.0735261	-0.119752	-0.00526737	0.963028	-0.0133355
134	-1.4861	0.436892	0.471196	0.592911	0.198253	-0.200695	0.397099	0.660511	1.58742	0.912891	-0.33186	-0.454562	-1.2094	-1.92678	0.532214	0.206667	-0.51425	0.938348	-0.498376	1.04353	-0.516543	-0.839154	0.793791	NaN	134	0.994408	0.0880582	1.12991	0.787569	0.337296	-0.959737	-0.186376	-1.16533	1.0432	-0.806875	-0.831506	-0.605696	0.692569	-0.674349	0.119799	-0.642193	-0.029742	1.58598	-0.13641	1.10039	1.19539	0.365612	-1.59113	0.60108
135	-0.692271	1.54913	0.677429	1.56299	0.343398	1.58347	0.0929656	1.26764	-0.0492419	-0.50032	1.6392	0.136861	0.308788	-0.834604	0.19626	0.634809	-0.278269	-0.166366	0.0915966	-0.0336152	0.261407	-0.941391	-0.560697	0.769975	135	0.230732	-0.334675	-0.826869	0.159119	1.31733	-1.14216	-1.07481	-0.359371	0.710056	0.0198913	0.717563	-0.450622	0.192437	NaN	-0.0363017	1.14637	0.159165	-1.40571	1.14341	-0.984398	-0.409898	1.0287	0.718165	0.737426
136	-1.01189	0.544012	1.03584	0.880148	0.0479927	0.0167471	-1.47909	0.0545008	-0.292188	0.268312	0.11828	-0.353206	-0.495946	-1.30713	-0.315507	0.263681	0.26349	0.515103	0.562584	0.637037	0.287559	-0.0750082	2.0196	-1.24992	136	0.783874	-0.889171	-1.84558	-0.414274	-0.196213	-0.928483	-0.449068	-0.698061	0.884839	1.28881	-0.44803	0.268181	1.1066	0.0671676	-1.2761	-0.0280861	-1.05811	1.75242	0.290029	-0.280353	0.647691	1.74454	0.896354	1.63253
137	-0.76625	-0.48853	0.719696	-0.126484	-0.234192	-0.129435	-1.56857	0.873215	1.97059	-0.28341	NaN	-0.836479	1.00757	-1.13214	-0.989629	0.546396	-0.0915699	1.24091	1.90637	-0.250296	-0.89706	-0.682331	0.62681	-0.769702	137	0.804494	1.45376	1.13365	1.83727	0.846961	-0.527219	-0.246167	-0.385694	2.65362	0.970902	-0.473446	-0.115051	0.147981	0.0686937	-0.720689	0.682792	-1.99555	NaN	-0.852422	-0.0226886	0.663511	0.515325	1.74313	1.25573
138	-0.675384	1.09941	-0.240849	NaN	-0.217228	-0.0038206	-0.246154	-1.15915	1.31776	-0.341277	NaN	-0.626946	-1.79195	-1.53297	-1.67032	0.108944	-0.271091	0.0671133	-0.251996	-0.533054	1.15444	0.432743	-0.572917	-0.886483	138	1.20937	-0.7024	-1.71579	NaN	0.73374	0.901192	-0.163027	0.850404	-0.164855	1.25732	-0.120099	-1.99194	-0.0555951	-1.28437	-1.1041	0.101739	-0.558325	-0.119399	-0.247145	-0.575027	-1.68044	0.40011	1.0057	0.443643
139	-1.11646	1.44223	0.302719	0.622425	1.63671	1.7045	0.282596	-1.99004	0.174134	0.0269018	0.575598	-0.902246	0.173724	-0.191906	-0.891009	0.732432	-0.63686	-1.24002	-1.15679	0.163743	0.555765	-0.314406	2.72402	-0.934866	139	0.914922	-0.455039	-0.682444	-0.888295	0.983648	0.0713429	0.909171	0.545802	0.0113477	0.756886	-0.398624	-0.870468	-0.378271	0.102179	-0.60202	0.926349	NaN	-0.593612	0.27368	-0.718728	-0.262557	0.0552724	1.23092	-1.04352
140	0.704825	-0.947747	0.577532	-1.23793	0.090481	0.700185	0.476724	-1.07933	2.39967	1.17482	-1.09867	-1.61432	0.084786	0.176061	-0.297353	0.225373	0.632687	0.442759	1.45645	1.20161	0.23378	1.49411	-1.22373	0.0515615	140	0.233142	0.783726	-0.902455	-0.258859	1.19448	0.0894523	-0.0626076	1.41293	1.16951	-0.111184	0.418575	-0.418607	0.792679	-0.431553	0.210531	2.77433	0.239612	0.160693	0.601866	0.373334	-0.744229	0.043897	0.800273	-1.20861
141	0.890225	0.0888167	-1.22596	0.982711	0.401888	-0.394769	-1.61588	1.12164	NaN	0.565287	0.420908	-0.122321	-0.279688	-0.0554581	0.169115	0.132619	0.108779	-0.837173	0.107487	1.14041	-0.185307	-1.34154	-0.83522	-0.527949	141	-0.0296428	-0.0889608	0.429809	-0.384842	0.293961	0.263138	0.70639	-1.32455	0.644915	1.16169	0.455036	-0.606584	0.223012	-0.0501864	-0.381851	1.10849	0.0401853	0.546202	-0.393693	-0.507412	-0.358539	-0.554209	0.19587	1.06557
142	0.447026	-0.12761	-0.601046	0.720967	-0.160415	-1.26571	1.47029	1.00249	0.281116	-0.433713	-0.00112119	-0.569232	NaN	0.361159	-1.34791	-0.7728	-0.0255116	0.686887	-0.0431966	-0.247614	-0.647854	1.08341	-0.320752	-0.0199646	142	0.162768	-0.0963466	-0.738077	0.78644	-1.31986	-0.666003	-0.943625	0.409105	0.772714	-0.0919048	0.196866	-0.982033	0.572142	-0.535134	0.416433	-1.54832	0.839816	-0.38884	0.792131	-0.211749	-0.555803	0.127725	-0.537514	0.152629
143	-0.0242316	-0.427731	-0.067856	-1.05209	-0.137261	0.953618	-0.857612	-0.869603	2.76465	-0.0750408	-1.47296	NaN	0.0197208	-0.904633	0.15814	-0.0130117	-1.49558	0.743486	0.603434	-1.41949	-0.866789	-1.32688	-1.00896	0.248788	143	-0.303167	0.160967	-0.44992	0.387175	2.18366	0.39136	-0.120948	-1.00092	0.186796	-0.492597	-0.13236	-0.730972	-0.0406201	0.690595	-0.13344	0.973186	0.0433946	2.83564	0.342766	0.476506	0.668525	-0.34436	-0.818269	0.580367
144	-0.133569	0.764086	0.549693	-1.08382	-1.02975	-1.45526	0.127334	-0.441178	-1.11855	-0.889661	0.683536	0.444421	-0.0206164	1.18982	-0.297278	0.9128	0.761908	-0.572683	0.44923	1.49148	0.558468	0.693801	-1.9541	1.00219	144	0.342024	-0.65027	0.233502	-0.101078	0.158125	-0.157202	0.250208	0.311415	0.310275	-1.13601	-0.257034	0.222154	-0.897075	1.45369	0.704168	-1.48556	0.54278	-0.571851	0.196547	0.799386	-0.160973	1.82254	-0.33256	1.10825
145	0.382969	-0.300056	-0.9707	0.221408	-0.356175	-0.473836	0.861454	-0.766565	-1.64901	0.0847462	0.47494	1.67169	1.63683	0.128883	-0.428376	-0.695168	0.121447	-0.436287	0.259571	0.0514236	0.34941	-1.01087	0.089093	0.441933	145	0.133956	0.681027	0.835558	-0.756531	0.3319	-0.765268	0.362249	-0.447989	-0.92987	-0.0610607	-0.377379	0.326572	0.331605	0.734596	-0.715161	1.09888	-0.639736	-0.310298	0.355422	-0.31348	-0.106433	-1.16861	0.128814	-1.09708
146	-1.11919	0.531307	0.643991	-0.113309	1.58494	1.18064	0.569592	1.27063	0.201194	-0.367624	NaN	0.567577	0.932916	NaN	0.232918	0.554614	-0.412323	1.5576	-0.143959	-0.431737	-0.0352497	1.50545	0.0625748	-0.286474	146	0.329922	0.778655	0.93652	-1.12248	-1.06116	0.469245	-0.640299	-0.0264725	-0.632727	0.661064	-1.10332	0.171975	-0.908146	-0.840878	0.251798	-0.548065	-0.308553	1.47749	-0.495051	0.0468516	0.685659	-0.185238	-0.167545	0.127691
147	0.463058	0.341523	-0.0143146	-0.268342	-0.625309	0.302218	0.456157	-0.631692	0.851203	1.26148	0.725162	0.0626888	-0.629218	0.798706	0.00892933	0.861088	0.112815	-0.855598	0.00740409	0.809893	0.607121	-0.0497468	1.32752	0.0352826	147	0.837676	0.282185	-0.441313	0.321192	0.43376	-1.24415	-0.244649	1.47877	-0.872002	-0.0431686	-0.63856	0.573385	-0.573474	-1.4565	-0.091882	0.825736	-0.265786	-1.77065	-0.461138	0.249915	-0.442313	-0.285014	-0.520306	-0.534637
148	1.10689	0.724452	0.899355	-0.112033	0.410105	-0.320445	1.18156	-1.13696	-0.769864	-0.420072	1.06326	-0.446906	-0.178902	0.302105	0.254937	0.0872707	-0.706704	0.183997	-0.68679	-0.636509	1.16832	-0.195232	0.0597519	0.769794	148	0.72663	0.412798	0.35214	1.68835	-0.46127	-0.407323	0.296511	-0.352523	0.0280254	0.541691	0.360102	0.28389	0.802506	0.0236962	0.448567	0.488905	0.504423	-1.84756	-0.214905	-0.480605	0.981132	0.864424	0.249367	-0.855884
149	-0.662212	-0.382341	0.792579	0.109902	-0.97426	0.782687	0.00777095	1.31304	1.52943	0.258529	0.467562	0.368069	0.851053	0.039451	0.333535	0.510635	0.0650311	-0.275367	-0.815698	-0.628552	-0.827121	0.920282	1.64959	0.525039	149	-1.09287	-1.41784	0.119639	0.483214	0.33194	1.33087	-0.191288	0.393239	-0.122116	-0.271871	0.887923	-0.54948	-0.0167797	0.329359	-0.777151	0.303116	-1.08599	-0.232592	-0.175875	0.371581	-0.553931	0.73323	1.0553	-0.783002
150	-1.35096	-1.21245	-0.00573868	0.594598	0.886238	0.690856	NaN	-0.861807	0.0506582	0.0160673	0.610788	0.262629	0.208117	0.513795	0.915992	-1.57805	1.47014	-0.194863	0.262517	-0.129307	-0.121003	-0.278691	0.930496	NaN	150	-1.1073	-0.0622131	-1.27786	-1.30145	-0.891053	0.785335	0.52545	0.559921	0.61399	-0.267831	0.608724	1.29109	0.506831	-0.34924	0.27852	-1.21636	0.329463	0.262466	0.0537972	-0.430994	-0.157324	-1.01049	0.746844	0.236106
151	-0.619522	-1.24473	-0.0964424	-0.241842	-0.304515	1.08107	2.13376	0.555701	0.187948	0.294077	-1.27852	-0.121743	-0.0195199	0.195876	-0.909051	-0.248398	0.650583	-0.415933	-1.05051	0.169049	1.25731	1.32611	NaN	0.126072	151	-0.420491	0.157998	0.768633	-0.918577	1.8618	-0.643829	-0.523589	1.10975	-0.593511	-0.565193	0.725023	-1.09191	-0.534449	0.0791952	0.303128	-0.524311	NaN	1.85065	0.673399	-0.940529	0.362581	0.37419	1.14772	0.699713
152	0.62882	-0.899843	-0.0255002	0.149439	1.03291	1.52504	0.811376	0.130332	-0.36232	0.735213	-0.488848	0.0188808	2.3978	-0.102325	1.60583	0.102849	0.355094	-0.539475	0.723193	-0.379182	-0.266632	-0.418321	-0.306997	-0.0427031	152	-0.906012	1.42494	0.204926	-1.07523	-0.774194	NaN	0.956942	-0.597001	0.74723	-0.192443	1.17879	-1.10534	-0.4488	0.544032	-0.298017	1.13158	NaN	-1.18686	-0.0394737	-1.19455	-1.03441	-1.78427	0.0581915	-0.469095
153	0.508088	-0.482842	-0.39732	-0.874176	2.09117	1.36554	0.81552	-1.07796	0.0412109	0.775986	0.973665	1.20326	1.46268	-0.626852	1.01928	-0.0911083	-0.406037	-0.856761	-0.108621	-1.16979	0.529777	1.46816	-1.44488	-1.05245	153	0.720851	1.2194	-1.57162	-1.16742	0.177873	-1.29028	0.973131	-0.312528	0.302751	-0.0291645	0.157129	-0.4425	-0.0762113	-0.458245	-0.835123	1.39444	NaN	-0.491793	0.740817	-0.447562	-1.3051	0.527932	-0.502664	0.341643
154	0.507283	1.20737	1.33773	-0.866405	2.77023	2.64584	-1.50822	-0.178541	1.44127	0.3002	0.106862	0.145845	0.909011	0.120935	-0.151305	0.219987	-0.131447	-0.187053	-1.11166	-0.44572	0.811493	1.36312	-1.17277	0.139263	154	-0.132296	0.158738	-1.25805	-0.0482067	0.225401	-1.81194	-0.738798	1.50667	-0.477453	-1.71007	-0.427101	-1.58608	0.038258	-0.807174	0.131666	-1.00121	-0.365617	-0.0250396	-0.628397	1.08459	0.090761	-0.0184541	-1.15136	1.18617
155	0.15275	0.0886511	0.785018	0.80718	0.54264	-1.14755	-1.44424	-0.329332	0.682212	-0.494456	-0.771505	-1.68153	1.28362	-0.675345	0.298166	-0.0351883	-0.116319	0.991154	-0.525884	0.202366	0.161132	-0.0567169	1.11773	0.438328	155	2.36998	1.23237	0.611178	-0.940774	0.85252	0.227982	-0.0513647	1.65713	0.542972	-0.188897	0.847667	-0.487413	-0.486206	0.424395	0.342097	-1.75208	-0.197586	-0.481598	0.723856	-0.48544	0.320005	-1.38454	0.0490634	-1.07651
156	1.432	1.29079	0.655894	0.100986	2.90752	0.0359019	-1.15615	1.17659	-0.687912	0.00780977	1.1276	1.88182	1.97022	-0.806247	-0.386725	0.796411	1.22233	0.481414	1.38549	-0.16876	-0.0631194	NaN	-1.68956	-0.363118	156	0.850999	-0.926776	0.347235	-0.413198	0.958207	-0.424764	-0.737846	0.257706	1.71648	1.13106	-0.189587	-0.520498	0.00350669	-0.584232	0.417872	1.33662	-1.74565	0.268634	0.977107	NaN	0.57172	-0.509293	-1.79432	-0.324184
157	2.20312	1.67678	0.378727	0.0126299	1.64395	2.04619	0.538724	1.2945	-1.56976	0.153447	-0.892139	0.274642	2.09322	-0.385583	0.314813	0.631569	0.379343	-0.409202	0.93407	-0.399045	-0.493212	-0.485448	0.312339	-1.86734	157	-0.787167	NaN	1.78739	-1.86117	1.19332	-0.0034924	NaN	-1.26285	-0.830409	0.229666	0.0107039	-1.01793	-0.36103	0.0735947	0.133203	1.10935	-1.41816	-1.25225	-0.395945	0.201293	-0.110147	-0.273195	0.478224	0.118933
158	1.96216	1.84959	-0.143077	1.34433	2.58018	1.65327	0.308502	1.73651	0.200616	0.622596	-1.27679	1.7986	0.983719	0.185564	-1.02968	1.18735	-0.0650366	1.46948	0.540268	-0.30552	1.65629	-0.088285	-1.05235	-0.227077	158	-1.01264	0.318488	-0.294434	-1.10832	-1.41662	0.99395	1.01618	1.66314	0.489303	0.506673	-1.04918	-1.81997	-0.127727	-0.314875	0.538973	NaN	-0.768606	0.792532	-0.460857	-1.16149	-1.29427	0.911586	-0.543729	0.22294
159	3.18244	2.0433	1.04035	1.62911	3.34004	2.68828	0.639301	0.8991	0.0429562	0.127428	0.311014	-0.206725	2.5672	-0.301042	0.35127	1.56654	0.868036	2.42923	0.802159	1.52669	1.09726	1.24079	0.744707	-1.32055	159	1.03644	1.15427	-0.459939	0.100219	-0.661041	1.47144	-0.164111	0.737183	-0.275282	0.434869	-0.873266	NaN	-0.761365	0.306761	0.830891	-1.83642	-1.0681	-1.21431	0.0862611	0.69904	0.481211	0.766934	0.425709	0.00829051
160	2.37547	2.27693	1.23067	0.880487	1.04796	3.02345	1.28575	2.60505	0.0321466	0.497612	-0.0690385	0.312478	1.83605	-0.176607	2.78115	1.80769	1.08715	0.820332	0.614418	1.52377	1.2746	0.854204	1.38754	1.25572	160	-0.236299	0.388189	-1.00345	-0.569612	0.406979	0.890031	1.06874	-0.806117	0.327891	0.372664	-0.372991	-0.937702	-0.842589	0.363176	-0.438455	2.02117	-0.947214	-0.875187	0.117436	0.587832	0.501605	-0.188947	-0.511616	1.05564
161	4.01269	1.20352	1.3611	1.33048	1.9375	2.14201	1.34233	1.56675	0.917354	-0.13291	1.2868	0.927136	1.89752	0.949274	0.974929	1.53097	1.45723	1.82184	1.74799	1.87402	2.32042	-0.0630556	1.21576	1.33207	161	-1.2688	1.52111	1.08324	NaN	0.185798	0.67278	-1.52084	1.536	0.12126	-0.297159	0.182047	-0.424403	-0.477305	0.230855	-0.644924	0.0385702	-1.0174	1.4187	0.0189488	-0.807663	0.793626	-0.413166	-0.434248	0.0391442
162	3.64183	3.36448	1.29315	1.23379	0.979669	3.26421	0.99642	3.55194	2.31819	0.343655	0.600934	2.71381	4.13948	1.54143	1.34195	0.824947	0.249626	0.602004	1.29236	0.318987	2.45289	1.92381	0.0979156	0.829264	162	-0.627079	-0.0167983	-0.20152	-1.75063	1.38661	-0.55191	-1.03429	-0.227381	0.956572	-0.421809	-0.461717	-1.38539	-0.291066	0.500728	-0.639433	1.43577	-1.36963	1.72228	0.132854	0.560302	0.0270259	-0.0838496	-1.27939	-0.971768
163	2.87736	1.61879	2.41704	2.59285	2.42293	2.44338	3.01446	-0.0638836	0.772903	0.795486	1.1531	-0.360945	1.86045	0.833555	1.16175	1.89026	1.38069	0.423255	0.794925	3.31672	2.29364	1.49374	2.71383	-1.38356	163	-1.6136	0.743766	1.15021	NaN	-1.53588	-1.59117	-0.505802	0.866773	1.1523	0.949405	-0.831282	-0.876856	-0.092135	0.376412	-0.413333	0.231838	-0.689354	0.710444	0.454894	-1.42725	0.564755	-0.656076	-0.394409	0.518082
164	2.65015	3.89924	0.749569	2.69865	2.83542	3.6716	1.68993	3.70319	2.33644	0.917087	-1.29009	2.1581	1.6192	1.89793	1.35057	2.52351	0.0348985	0.362123	1.37737	2.21955	1.96927	2.13062	1.4259	1.30129	164	0.51354	1.43265	2.307	-1.17653	1.0971	-0.991506	0.880925	-0.251367	-0.0928454	0.440733	-1.12995	-1.1719	-0.616555	-0.564856	-0.272752	1.27873	-0.642022	-0.403108	0.663833	-0.179088	-0.145084	0.290524	0.401501	0.230864
165	5.8887	1.71266	0.980602	2.73016	2.76153	3.21366	0.69701	1.79027	-0.399503	-0.205656	-0.612925	1.44407	3.03217	1.13671	1.14993	2.26164	-0.796832	1.03247	2.68901	3.60785	4.00002	3.09219	0.921101	-1.5469	165	-1.45079	0.583582	3.18831	-1.43416	-0.371854	-0.256476	-0.19198	0.192858	-1.39648	0.62716	-0.57389	-1.16698	-0.305602	0.0485843	-0.958433	-0.703164	NaN	-0.675305	0.78313	-1.23827	2.03896	0.330042	0.597813	-1.22003
166	4.56978	4.04257	1.85061	1.89829	2.92384	3.22272	1.56803	2.75591	1.36658	0.0265865	1.09984	0.855175	3.07846	-0.559087	2.58192	2.23052	-0.299261	0.6629	2.8787	4.2132	2.81673	1.51038	2.46361	0.951966	166	-0.339093	-0.291292	-0.40869	-0.441046	0.197214	-1.161	1.16487	0.0968625	NaN	0.656086	0.0296246	-0.903004	0.289449	0.612656	-0.21145	-0.110958	-1.19757	NaN	-0.711346	-1.64759	-0.278369	-0.604656	0.453875	1.39185
167	4.68681	3.56227	2.18957	2.45388	2.08212	1.65866	0.88909	-1.37021	0.569355	0.864374	0.267566	2.21425	4.12825	0.442706	0.707004	2.96407	1.31217	1.29533	2.31676	3.98455	2.59175	0.166108	2.35069	-0.0736894	167	1.22085	1.35012	0.0816307	-0.885968	0.938149	0.218065	0.341295	0.511197	0.184211	0.383884	-0.533788	-1.2658	-0.68672	-0.0450797	-0.468581	0.449612	NaN	0.91194	-0.75061	-0.661449	0.0888557	-0.15018	2.2009	0.707805
168	3.65505	2.59584	2.3311	4.59926	3.26676	1.49401	2.71586	6.28571	0.237713	2.05812	0.418425	2.43608	3.58846	1.59334	0.386304	2.26655	-0.18241	1.14939	3.51817	5.31021	3.59277	3.60694	2.41162	-0.141698	168	0.594766	-0.939764	-1.18147	NaN	0.205424	-0.632349	0.337011	-1.43126	0.920169	0.0675725	0.812336	NaN	-1.18282	1.41219	-0.243121	-1.05611	-0.989393	0.356977	-0.171435	-1.22013	0.48967	0.173876	0.886431	-0.122153
169	4.25196	1.31203	2.49816	1.86364	4.12982	2.32411	2.65509	4.43867	0.0662644	1.81774	2.41249	3.16474	2.81029	1.034	1.81091	2.1148	1.22745	1.74934	3.24529	4.32411	2.45226	3.14411	1.64503	2.48184	169	0.575617	0.0442754	0.447134	-1.84304	1.32162	0.549674	0.337002	-0.716377	0.719468	-0.322496	0.239034	NaN	-0.0501591	0.125546	-1.20531	-0.269792	-1.00946	-1.07562	-0.361991	-0.864427	-1.17695	-0.0778553	-0.304918	-0.661664
170	3.93298	1.72578	1.0737	3.22744	3.7828	1.45554	3.74525	2.01486	1.57346	2.30683	2.36807	1.19589	3.74453	2.14554	1.37906	1.72069	1.39822	1.73384	3.33732	5.69	3.10121	3.62881	1.36188	2.71271	170	3.73458	0.00194963	-1.82874	NaN	-1.21067	0.0606876	-0.521172	0.497984	0.956534	1.27124	0.856059	-0.344839	0.0144043	0.14703	-1.51594	-0.347988	-1.33524	-1.81049	-0.0882328	0.975345	-0.789243	0.564389	0.879315	2.2027
171	4.06861	2.02549	2.24608	2.38904	3.78892	2.9915	2.37595	2.60268	0.729091	0.848833	1.66409	2.13113	1.72591	1.72716	1.41572	1.93922	1.69578	0.589361	3.02226	5.08412	3.35677	1.21562	2.84207	0.802381	171	-0.291707	1.68276	0.196738	-0.58604	-0.900088	-1.36985	0.0923479	0.554895	-1.21294	0.204546	0.498327	-0.169323	-0.138051	0.53165	-0.43166	-0.310412	-1.27052	-1.97038	-0.221694	0.573042	1.1576	-1.15748	0.230186	-0.010871
172	4.18532	3.94857	1.77068	3.35274	4.36761	2.91478	4.41194	3.38071	0.267916	1.02126	2.9198	0.0395066	3.71835	1.69344	3.69089	2.75031	1.49207	1.4219	2.25768	4.32276	4.16857	4.11868	2.77775	1.93221	172	-0.439989	-1.52465	-0.187759	-1.96104	0.198675	0.24279	-0.149427	0.641442	-0.306241	0.212924	-0.119689	-1.29965	-0.416835	-0.033413	0.331233	-0.230172	-0.856786	-1.34424	1.07388	0.364748	0.143432	-0.14032	0.186715	-0.326364
173	5.46558	1.99596	2.06963	3.64654	4.64323	3.78464	2.45034	6.39404	2.65869	1.73612	2.95208	2.91684	3.77673	2.44617	3.13296	2.82016	1.63043	0.488461	3.96898	6.04801	4.13489	3.38394	2.37826	1.17614	173	-0.173918	-0.560915	0.134362	-0.281962	-1.39268	-0.0421549	-0.0834287	-0.87916	-0.128356	-0.625961	-0.0356988	-0.45484	-0.60577	0.39867	0.140759	-1.19609	-1.56538	NaN	-0.319473	-0.898612	-0.127855	1.33962	0.538284	0.928212
174	4.37745	4.28089	1.22937	4.63474	3.81449	4.49108	5.31689	2.8377	0.179366	0.395713	2.91174	1.98423	3.39388	2.29305	1.54537	1.87262	0.969019	1.3226	4.01343	5.24468	3.72031	3.55954	2.39695	2.77972	174	0.372155	-0.507235	-0.156762	0.0749573	-0.988098	-0.279915	0.136479	0.847266	0.206534	-0.621246	1.51955	-1.09752	-1.0375	0.780568	-0.372976	-1.08952	-0.839431	-1.13456	-0.647187	0.442034	-0.369806	0.413365	0.806262	1.39655
175	3.981	3.95801	2.12599	3.89087	3.78125	4.84226	4.07246	3.93903	1.59755	1.93646	0.69698	2.12159	1.38187	3.09788	2.60815	3.20109	1.4983	2.27831	3.87455	4.29907	4.2389	4.88243	2.5928	2.4073	175	-0.89669	1.34682	-0.531509	-1.79134	0.229878	0.301058	-0.536179	0.162199	-0.0163412	-0.292855	0.753202	NaN	-0.0761486	0.206479	0.390714	-0.338377	-0.380822	-0.888143	NaN	0.663276	0.985198	0.563756	0.636334	-1.15359
176	5.05711	4.26338	2.30019	3.9219	3.85673	6.47616	2.64223	4.62099	1.8064	1.87773	1.75618	2.12872	4.39897	1.83622	0.987644	1.38644	1.21641	0.810024	3.28446	5.74865	4.07036	4.19457	3.44678	1.64572	176	0.163459	0.872726	-1.30234	-1.50798	-0.283655	NaN	-0.643502	-0.316903	0.869777	0.754058	0.746647	-1.51542	-1.12435	-0.298399	-0.839286	0.696204	-0.00746228	-0.720375	-0.25131	0.273266	-0.944923	1.52551	0.357106	-0.375135
177	6.02063	2.19425	2.37402	4.59306	3.25879	2.56942	2.47924	2.15202	-0.718242	1.60368	1.8712	2.032	2.92363	2.57552	4.92584	2.2876	0.939479	1.697	3.21862	4.85477	4.28004	1.69994	1.80029	1.50863	177	-0.993436	0.92206	-0.352962	-1.35491	-1.15113	-0.536057	0.188037	0.998753	-0.262093	-0.404404	-1.16547	-0.777756	-0.865521	-0.749395	0.612027	1.17357	-1.57371	0.456931	-0.0901746	-1.53154	-0.301022	-0.440564	-1.10815	-0.261852
178	5.85562	4.59976	1.79609	2.78328	5.18321	3.38889	2.78899	3.37577	-0.784945	2.24238	2.49922	2.90872	3.06417	3.42099	1.10302	2.30478	1.43773	1.00455	3.329	5.66144	5.64368	3.41833	2.51342	3.05335	178	1.20543	-0.34872	1.26479	NaN	-0.837182	-1.671	0.766288	0.0372914	-0.596979	-0.589124	-0.0483016	-1.3503	0.34829	-0.159778	0.287479	-1.57671	-1.0974	0.258848	0.488785	-1.35845	-1.65066	1.33987	-0.299355	1.39437
179	5.04447	2.53719	1.55291	3.99375	3.96006	4.25722	4.04164	3.62345	2.09224	2.28251	2.1526	2.68	1.40845	0.343172	2.48557	1.63593	1.73266	0.357698	4.0878	6.56415	4.51368	3.47305	1.77645	2.09691	179	1.24643	-0.347022	-0.38022	-1.70553	-0.373247	-1.94844	-0.0650904	1.22264	-1.80966	0.259716	-0.495041	NaN	-0.751055	0.0121538	NaN	0.998149	-0.88576	0.92408	1.40088	-1.67898	-0.791214	0.189341	-0.18645	2.46973
180	4.90819	2.14841	2.06978	5.78332	3.84097	3.902	4.97996	2.95933	0.226434	3.57771	3.03881	1.62784	2.30803	2.40832	0.915634	3.00753	1.96733	1.09507	3.71556	6.3528	4.72285	5.3095	0.361701	0.671965	180	-1.41587	-0.709895	-0.0852367	0.119475	-0.903537	-0.805136	0.343382	-0.995615	-0.417048	0.722684	-0.671637	-0.850396	0.23685	-0.826374	-0.894121	0.52874	-1.43143	0.998786	-0.0583847	-0.884569	-1.06768	-0.384944	-0.697349	2.11092
181	5.03546	3.67967	1.60703	3.58295	4.97422	2.56595	4.2124	3.94944	2.74665	0.873379	3.52229	0.443777	5.12964	3.26147	2.59624	3.35064	2.76274	1.89426	4.14392	6.47385	4.87688	4.34329	3.62629	1.58945	181	-0.768149	1.82609	-0.357805	0.139241	0.682898	0.193169	0.588186	1.10121	-0.3064	0.520452	0.277843	NaN	-0.625587	0.589561	NaN	0.215746	-0.862832	1.33746	-0.109952	-0.105608	-1.34196	0.969174	0.272016	0.265633
182	6.65187	3.59258	2.51256	3.09818	5.13183	4.09915	3.63421	5.23372	0.96113	1.78214	2.20315	3.16024	2.62368	0.399606	1.39294	2.84348	0.427209	1.87301	4.40063	6.13289	4.41718	3.27783	3.59109	2.77998	182	0.629518	0.191428	-0.255536	0.421603	-0.132847	0.65701	1.02661	-0.368625	0.213622	0.841906	-0.206684	-1.87668	-0.100191	0.786276	-0.45988	0.540799	-1.04665	0.0625446	-0.265797	0.650191	0.252103	-0.774668	0.29148	1.90568
183	5.13859	3.18683	2.42521	3.524	3.86214	4.00768	3.64897	4.24659	1.30425	1.04216	1.63193	3.87227	3.71731	1.75072	2.55842	1.83543	0.952027	1.51613	4.10455	5.52737	3.87346	2.25702	2.9887	1.34947	183	-0.576692	0.21153	-1.11806	-0.787695	-0.0401569	-0.329832	1.41472	1.50887	-0.0978254	-0.81838	1.26093	-1.95106	0.463286	-0.0612781	-0.503919	-0.870499	-0.56194	1.39043	NaN	-1.18871	0.238078	0.589459	0.791004	-0.282967
184	4.78197	4.61371	3.16651	4.26661	4.36397	4.67083	4.9725	2.87668	2.66151	-0.33328	0.855308	2.09984	2.66443	2.66784	1.26293	1.12682	2.45158	1.13524	4.17176	5.8727	4.68639	3.82871	3.54775	1.0609	184	-0.866288	-0.110897	0.274594	NaN	-0.393887	0.015889	-1.3305	-0.0823105	-0.0169748	1.01841	1.61829	NaN	-0.255188	-1.31728	-0.485171	-0.891882	-1.86037	-0.277208	0.493823	0.347914	0.704795	0.408804	-0.677781	0.120259
185	5.74782	3.9142	1.96616	2.86458	4.31066	5.41288	4.24107	4.4313	-0.127738	0.611365	1.88047	2.42835	1.99248	2.05813	1.48424	3.21682	1.48861	1.79168	4.52935	5.81147	4.89926	4.00176	2.38132	2.78181	185	1.38234	-0.872092	-0.723336	NaN	-1.63622	-0.514003	0.0450644	0.142785	0.165815	0.761296	1.46678	-1.86205	-0.179142	-0.996405	-0.0675011	0.317459	-1.01925	0.0687263	-0.446638	-0.327648	-0.290499	-0.0394604	-0.156294	0.788139
186	5.72716	4.22619	2.61859	4.1301	5.57424	3.84278	4.61365	5.3389	1.71623	0.630478	4.15406	1.74684	3.46155	0.637552	2.36784	2.35647	1.876	1.97702	4.55452	5.66514	5.47632	4.10766	3.18732	1.55987	186	0.224362	2.15431	0.913749	-1.88488	-0.487956	-0.105284	1.79438	0.549546	2.24081	0.71304	-0.315795	-1.08656	0.505308	1.23802	-0.999055	0.184634	-1.46154	-0.472266	0.254821	0.661212	-1.43855	-0.226831	-0.290643	1.54599
187	5.40212	4.94331	1.13549	4.68497	5.70673	4.80562	3.37833	4.25701	1.35757	1.86074	2.72605	2.6653	3.46873	1.65163	2.10554	2.20956	0.761061	1.17807	5.48031	5.94473	3.69584	4.14274	1.73232	2.73881	187	0.732649	-0.138977	-1.15083	-1.26439	-1.69936	-0.81213	0.926955	-0.550245	-0.0295671	-0.0621244	-0.326739	NaN	0.858324	0.725404	-1.14183	-0.749845	NaN	-1.82285	-1.18294	-0.981939	-0.923035	1.02537	0.889839	1.14119
188	5.83956	4.43073	0.933676	3.72635	4.12812	5.04696	4.02643	3.99959	1.55043	1.6742	1.31756	2.77969	0.477058	0.959042	1.3956	2.85459	4.44377	1.64603	4.96071	6.28873	5.11269	4.08515	1.56922	1.04011	188	0.185482	0.412677	0.81275	-0.423461	0.237371	0.926276	-0.051563	0.862959	0.459124	-1.24303	0.984894	-1.63306	0.853783	-0.533233	0.0374413	-0.213531	-1.20066	1.5439	-0.315629	-0.580317	-0.735246	-0.625729	0.71162	-0.485568
189	3.84645	3.04734	1.74612	2.39327	4.04571	4.06678	3.05366	4.07002	0.0782598	1.34696	2.02721	3.35105	4.10491	1.61893	2.17524	1.66425	1.72161	0.990757	3.63084	4.75957	5.35662	3.17322	2.19098	2.40714	189	-1.00615	1.16171	0.735275	0.647106	-0.0160952	0.595007	-0.00228706	1.52638	0.815091	-0.139013	0.535745	NaN	1.32842	0.292862	-0.136497	0.369778	-0.965074	-1.44815	0.163262	-0.53062	-0.98033	0.358206	0.425364	1.03409
190	5.3169	3.55429	2.12625	3.48564	4.90397	2.40556	5.30404	2.47375	2.15009	2.35303	1.8473	2.1755	2.6917	2.10725	0.352115	3.26252	1.29758	3.04341	3.7325	6.19813	4.8307	3.24238	2.43117	1.75749	190	-0.635999	-0.348421	0.923814	0.563466	-0.949362	0.149403	-0.357069	-1.26729	-1.85893	-0.470123	1.51244	NaN	-0.847442	0.401409	-0.705686	-1.11499	-1.90468	-0.598983	-0.557848	-0.491093	1.76493	-0.056893	0.653944	1.07888
191	4.95932	5.80357	2.29566	4.71535	3.4697	3.92041	4.54093	6.25824	-1.15454	2.27547	3.18595	2.5316	4.5236	2.81003	1.30274	1.96368	3.22788	1.46419	4.60965	6.8595	4.33305	3.68604	3.12815	1.28986	191	0.911809	1.24809	-0.373439	-1.33928	0.18147	0.0514346	-0.0080598	1.01959	0.236093	-0.482194	-0.238863	-1.46559	0.184488	0.0244495	-0.700786	-0.894453	-1.06561	0.00210558	0.701081	-1.41538	-1.18499	0.0145826	0.912324	0.950061
192	5.48316	3.00818	2.35761	5.28817	2.44443	5.24061	3.47863	6.37247	0.528042	1.7913	0.57458	0.243732	2.83923	2.11936	1.50098	2.6211	1.84462	1.00031	4.97295	4.86728	4.84704	2.64046	2.51293	3.40329	192	-0.100361	0.536146	0.409849	NaN	NaN	-1.27085	0.150607	-0.0225615	-0.191397	0.165249	-0.497949	-0.973543	0.554216	0.319466	-0.434373	-1.78746	-1.42918	-0.528725	-0.651681	0.615986	-1.18924	-0.524982	-0.207134	0.374581
193	4.99384	4.03107	2.7257	5.49176	4.17562	4.72008	4.54234	4.81059	2.91789	2.0359	3.14817	2.94304	2.95427	2.2564	1.37656	3.46332	1.1091	2.28006	4.26664	6.05072	4.50321	1.33764	0.237059	-0.147703	193	-1.3257	-0.494329	1.04452	NaN	-1.74962	-1.90687	0.829238	0.287742	-1.19787	-0.496687	-1.08111	-1.53146	0.552586	-0.470843	-1.75864	-1.87541	-0.602378	-1.21046	-0.0914819	0.865374	-1.52658	0.240422	0.282941	0.450737
194	5.07663	4.00434	1.78677	6.11594	3.63571	5.53402	2.29518	0.892358	1.76687	1.15903	1.96017	1.14744	3.23408	2.14183	2.19026	3.05714	2.21155	2.09087	4.15291	5.52918	3.7905	3.34343	2.96091	0.777	194	-0.75969	1.76847	NaN	-1.49325	NaN	-1.49961	-0.265052	0.587048	-1.03178	-0.62075	0.0983984	NaN	0.24357	-0.395036	-1.07449	0.999328	-1.11525	-0.155137	0.296501	0.20171	-0.192452	0.298264	1.11103	0.369853
195	4.90657	3.30249	2.21322	3.32964	4.03895	3.18959	5.4729	5.78023	-0.332907	0.823877	1.29756	2.03399	2.50904	3.14494	1.40188	2.88766	2.11432	2.81691	3.99188	5.85662	4.10819	2.14236	1.2597	1.29308	195	0.180769	0.766274	-0.938953	-1.6561	-1.69675	-1.44784	0.0512895	1.54949	-0.842119	0.228978	1.12244	NaN	0.660804	0.117918	-0.329082	0.953373	-0.267569	-1.61525	-0.214155	-0.761413	-1.17685	-0.645295	-0.588088	1.90425
196	4.39275	4.58668	2.2194	3.66176	3.07269	2.61294	5.54963	4.94697	-0.109214	1.90263	0.603181	1.3503	2.17494	1.45007	1.23628	2.75531	2.2383	1.34867	3.71227	4.76649	4.8364	3.32624	3.84751	2.8902	196	-0.498969	1.58616	NaN	-0.15916	-0.892244	-0.875974	0.272049	0.375368	-0.12927	0.729944	-0.616264	-1.53107	0.841606	0.780652	-0.862718	-1.72594	-0.511387	-0.18078	-0.656525	-0.753287	-0.206059	0.363557	-0.15504	1.33189
197	4.15833	4.11251	1.37393	2.73055	4.17802	3.88416	4.5559	4.78918	0.718341	1.19298	0.776635	2.4281	0.865505	1.64606	2.05306	3.73489	0.293931	1.60721	4.82862	4.77638	4.16196	1.61266	1.42358	1.02381	197	0.908405	1.12397	0.133736	NaN	-1.04911	-1.70688	0.206315	1.72796	-1.15972	0.881098	0.0634887	NaN	0.654038	-0.279209	-0.40103	-0.519642	-1.75396	-0.367501	-0.152571	-1.49342	0.352557	0.319916	-0.713461	1.76926
198	3.73856	5.45411	2.40426	4.48158	3.57746	3.01445	5.60909	5.19177	0.184402	1.18792	1.26054	1.92828	2.04051	0.961128	2.17043	2.77083	0.570024	2.54933	5.3354	4.94648	3.82034	3.9733	3.76398	0.949582	198	0.734034	0.785156	-1.88564	NaN	-0.378238	-1.16433	2.39799	1.28479	-1.73701	-0.228692	-0.167057	NaN	0.161895	-0.728483	-1.66826	0.675512	-1.68843	-1.30176	0.197341	-0.633299	0.43445	0.645357	0.998512	1.04058
199	4.22136	4.71412	2.242	3.2642	2.88654	2.96717	3.8934	3.02962	0.321356	0.653706	2.86548	1.92937	1.8886	1.86692	-0.00172182	2.39787	1.98242	3.43249	3.87235	5.29984	5.19788	3.89406	2.18582	3.1144	199	-0.905058	-0.688659	NaN	NaN	-0.641618	0.162626	0.526533	0.507096	-0.991885	-0.386653	-0.00308975	NaN	1.2123	1.58298	-0.253748	0.906256	-1.08955	-0.86884	0.529711	0.498491	-0.823663	-1.34483	1.35251	1.40545
200	4.88799	3.62255	2.52935	5.65158	5.33284	4.88608	3.4446	3.39033	2.96589	1.82654	2.58838	2.29456	1.82404	1.24864	0.902266	2.68476	3.10998	3.0265	4.333	5.28977	4.83325	6.32179	3.13797	3.06572	200	1.5206	2.52526	-1.26068	0.247775	-1.23537	-1.8903	0.644163	0.34085	-0.183007	-1.29237	0.942415	-1.53777	0.526435	1.05647	-0.986777	-0.543809	-0.581675	-1.30431	0.0524992	0.48006	-0.368928	0.882569	0.178893	0.163966
201	4.36808	4.38415	2.38226	1.82284	4.46835	2.06795	5.01986	4.21718	1.18016	2.12849	2.45675	4.21353	1.26035	0.886024	0.998046	3.42951	2.7257	2.61536	4.18166	4.82853	3.97975	4.29246	1.84756	1.49161	201	1.23503	1.18007	-0.73562	-0.79201	-1.82995	2.08934	1.05858	0.727864	-0.604586	-1.07023	0.742286	NaN	1.19084	1.37955	-0.231358	1.07631	-1.15762	1.36527	-0.376383	-0.466156	0.414486	-1.38293	0.322832	-0.716844
202	5.01886	4.80954	3.2098	2.5722	4.15291	2.99795	5.27922	0.824706	2.76199	2.11781	3.39848	3.43024	1.45676	1.62279	-1.27838	4.08739	2.81425	1.41664	3.41132	5.48749	3.84186	5.41712	1.43077	2.59653	202	0.254735	1.21132	-0.801285	-0.511156	-0.581646	-0.651181	-0.504459	0.37869	0.140358	0.215912	0.23383	-1.60868	0.8529	1.50096	-0.0901791	-0.654732	NaN	-0.578705	-0.122043	-1.55313	0.109755	0.0293955	-0.02212	2.00978
203	4.0502	4.35006	2.33797	3.13031	4.71547	2.47969	2.78262	3.45481	0.596167	2.00965	1.82221	0.520516	1.10996	1.25391	-1.68033	3.21897	2.78355	1.70839	3.8949	4.30231	2.87989	6.3358	2.19106	-0.2774	203	0.827898	1.4104	-0.91911	NaN	-0.300264	NaN	0.854875	-0.85266	-0.676238	1.07763	1.29332	-0.895541	0.532794	0.554993	0.240806	2.49352	-0.556521	0.0133947	0.719013	1.37822	0.860272	-0.646466	1.6817	1.49151
204	4.49947	3.79018	2.70756	3.61452	4.51182	3.57031	5.92021	2.02076	2.52106	0.448339	2.59149	1.55677	1.72709	1.49776	0.960021	3.25974	1.42782	2.22943	2.82351	4.22008	3.9054	1.86395	1.03886	2.3981	204	1.26207	0.899402	-0.989934	-1.47887	-1.13644	-1.30139	2.12848	-1.29844	-0.286294	0.282475	-0.0951766	-0.486523	-1.05709	0.539706	0.896218	-1.1374	-0.190913	0.783187	-0.39144	-0.335727	-0.324364	0.862742	1.3433	1.38346
205	4.72553	2.72006	0.757982	1.56581	3.68548	2.4366	4.93371	2.40338	1.61996	2.55615	2.0018	1.3442	0.255764	0.800829	0.420284	1.67541	2.11486	3.05838	3.00626	4.40918	4.15496	4.02711	-0.163076	0.877578	205	1.58332	-0.411546	-0.630105	0.188414	0.787368	0.0742174	0.529972	-0.501257	1.63612	0.205209	-1.94482	-1.51563	1.21433	0.37956	-0.686224	-0.626383	-0.475514	0.437575	0.284311	-0.272402	NaN	0.289118	-0.111368	2.8791
206	3.63809	3.5965	1.54903	3.64256	3.79101	4.26801	4.47594	2.55231	1.08759	1.49917	2.48039	2.89231	1.41053	2.07903	0.0981501	1.65553	3.39455	1.87053	3.28263	4.92108	3.93525	1.77739	2.40858	1.98083	206	1.40248	1.45079	1.6584	-0.273656	-0.289822	-1.39658	0.712205	1.79775	-0.387409	0.109231	-0.693208	-1.07701	1.31395	1.77509	-0.138428	1.23809	-0.789804	1.37109	0.457594	1.44746	-1.31307	0.255982	0.626949	2.39509
207	3.49974	4.25326	1.31716	4.70673	3.4005	3.06346	3.06974	3.68109	3.38505	1.22013	-0.364524	4.35189	2.64414	2.63964	0.980738	1.78073	2.93334	2.88064	4.54088	5.68725	4.62524	2.547	2.90246	-0.286553	207	0.172763	-1.17079	-0.601463	-0.578382	1.01313	-0.372989	0.877881	1.06924	-0.597115	-0.927551	-1.33096	-1.28817	0.80172	0.208633	-0.0725397	-1.89291	-1.57812	-0.755093	-0.232117	0.172472	-0.624709	0.767589	0.0772467	2.6313
208	2.31649	3.38645	1.53238	1.49939	2.37454	3.22247	5.49545	3.34749	-0.281593	1.7957	3.14849	0.703395	1.75779	2.44593	0.0234976	1.88391	1.7809	0.250451	3.18952	4.21062	3.5261	2.76349	1.87422	1.39993	208	0.848034	-0.41323	0.0638708	-0.41929	0.246352	-1.81408	-0.147069	1.41443	-0.300575	-1.07984	0.576326	-0.462352	1.214	1.14673	-0.216613	-0.0219068	-0.320224	1.37329	0.685846	-1.02692	0.137909	0.580509	0.548892	0.713709
209	3.40787	3.22871	1.91688	2.31903	3.48497	2.523	5.11027	4.87919	0.693062	1.99126	1.66389	3.60802	0.18535	1.48586	1.02859	1.76964	1.09085	1.09122	3.49733	3.97046	4.41117	3.28185	1.96295	1.88874	209	0.601673	-0.141842	0.622722	0.202852	1.44637	NaN	1.14546	2.14497	0.119486	1.63586	-0.0306585	-1.26223	0.729413	-0.53398	-0.0367858	-0.720331	-0.137121	2.31892	0.108471	0.131442	0.269968	-0.349505	-1.05529	1.17886
210	3.35156	3.38525	1.07479	1.42122	4.0348	2.91093	5.64489	-0.102076	1.0401	1.78709	2.10422	3.62406	0.612219	2.89311	-0.287347	2.40167	2.04918	0.905658	2.85426	5.06623	4.06256	1.41527	-0.948169	1.48532	210	1.4618	0.850463	-1.07369	NaN	-0.81642	NaN	0.699808	0.881171	-1.56156	0.825678	0.484191	-1.37112	1.47411	0.27733	0.720603	1.7202	-1.19257	-0.653649	0.0275724	-0.124068	-0.775186	1.63712	-0.667337	1.17162
211	3.21359	3.24125	0.902962	2.3016	3.50733	2.87524	1.38787	3.65889	-0.262866	2.47471	2.79729	4.31131	1.77024	0.709109	0.602933	1.96536	3.16091	1.96806	2.27409	4.22712	3.38281	2.00657	0.67683	0.374454	211	-0.787878	3.14901	0.396382	NaN	0.545182	-0.583844	0.391307	1.402	-0.562272	-0.632224	-0.407658	-0.986641	1.08991	1.59936	0.66741	1.91372	-0.0331673	-0.379752	0.605898	-0.657629	-1.63244	-1.26817	0.441024	2.64559
212	2.82022	3.47947	2.02201	3.16305	2.38756	3.95414	4.78509	3.32802	1.87774	2.59931	2.44811	2.66226	0.705737	1.38891	0.458258	2.25972	2.85664	0.873966	4.17609	4.22805	2.74291	1.42963	1.77554	2.44861	212	1.67774	0.449535	0.362732	-1.50006	1.3332	-1.07503	0.11413	1.00415	0.663394	0.0453913	-0.19986	-1.58103	1.08092	0.571607	-1.1993	1.58588	-0.728197	1.82347	-1.02337	0.349537	-0.870729	1.13407	1.05877	0.11944
213	3.05142	2.62435	2.05763	1.57209	3.53852	1.41248	3.30085	1.47609	-0.520174	1.60436	1.38736	0.290424	-0.0255218	-0.819925	0.964516	2.76307	2.34347	1.12202	3.66155	4.06376	2.98193	2.78922	1.51404	1.87264	213	1.7573	-0.15621	-1.87181	NaN	NaN	-0.942219	2.08323	0.0729311	-0.111256	-0.155278	-0.174924	NaN	0.241217	-0.773162	0.327371	0.279058	-0.30758	0.49982	0.584441	-0.825495	1.61069	1.30511	2.51832	1.07029
214	2.89114	3.935	1.36247	2.71539	3.26229	1.35713	3.65365	1.02058	3.52988	2.00134	1.57507	3.28227	0.733282	0.289947	-1.15527	3.08561	3.30655	2.14253	3.31422	3.35587	3.10926	2.12988	-0.642777	1.5601	214	1.71288	1.12819	0.8188	0.0364972	-0.657294	-0.657705	0.564421	-1.31334	-0.111195	0.78543	0.164393	-1.6921	1.58669	-0.609487	-0.680163	-0.886145	0.48617	0.662658	0.396767	-1.36606	-1.81157	-1.31906	0.788888	0.355381
215	3.05381	3.81686	1.18749	2.75883	2.31489	3.0593	3.8657	0.695518	0.127503	0.883146	1.42433	2.13373	0.101087	1.24703	1.2732	2.11725	2.86762	1.76782	2.47735	3.33603	3.18308	2.44909	1.86389	0.725359	215	-0.832363	0.149548	1.02462	-1.79347	-1.67121	-1.61253	0.620182	-0.0974573	1.12697	0.585423	0.237145	-1.64046	1.18728	-0.380332	0.11746	0.85817	-1.01914	1.27169	-0.955708	0.352762	-1.92813	0.81388	-0.564507	1.05627
216	2.37028	3.66439	1.22243	3.40831	2.26861	2.35207	5.17926	2.19803	0.871413	1.03435	2.56189	1.78608	0.769706	2.28711	2.24396	2.9017	1.93913	2.61415	3.06255	4.1619	4.23288	2.571	-0.447075	0.326168	216	-0.295649	3.45633	-1.55901	-0.572486	-0.42935	-1.9196	-1.05711	1.02809	-0.529877	1.80892	-0.452	NaN	1.02525	0.0694216	-1.09393	0.555418	-0.771447	-0.192445	0.256565	0.287282	-1.45972	0.357272	0.257686	0.64236
217	0.892833	3.3158	0.708612	1.67778	2.85053	2.21756	2.9355	1.18667	0.505983	-0.733416	0.584582	1.30195	1.13685	1.67399	2.63199	2.73946	2.10171	0.507204	3.83279	2.9122	2.85631	2.27979	2.29105	-0.234862	217	-0.896257	0.698208	-0.454082	1.13358	-1.69245	-0.890195	0.268409	1.25705	0.78233	-0.732324	0.554772	NaN	-0.0598063	-0.795271	-0.989853	0.194474	-1.07051	NaN	-0.602768	0.0748943	-0.658697	1.13293	1.14399	1.03549
218	1.97758	3.8204	1.62449	1.4654	2.65152	1.91987	3.49686	3.36493	0.723844	0.193544	1.33584	2.09059	-0.950872	-0.152177	0.584991	2.01898	0.467282	0.592755	3.7894	3.45889	2.05046	3.31535	0.22582	1.72055	218	-0.553883	0.0330833	-0.33212	NaN	-1.51163	-1.20108	1.19819	-1.19371	-0.508075	-1.3537	-0.780095	-1.79017	2.3477	-0.228981	-1.15041	0.983853	-1.44266	-0.0795343	0.812367	0.959765	-0.230464	1.56804	-0.193747	1.63768
219	0.269211	3.05987	1.61289	3.27164	3.15194	2.06104	4.31414	-0.189853	1.1737	-0.157919	0.660333	2.21045	-0.00974611	2.09134	0.613412	1.65784	1.54224	2.4103	3.28773	2.44167	4.30446	2.24445	0.905136	2.996	219	0.348203	1.82152	0.419423	-0.944765	-1.05217	-1.41902	0.862642	-0.291584	-0.219208	0.313192	-1.07027	-1.44832	1.1773	0.322961	-0.802622	0.96141	-0.0953249	1.29035	-0.150574	-0.598644	0.59525	-0.66705	-0.290262	0.785032
220	2.10597	4.27551	1.14258	3.78853	3.97165	0.780797	3.56757	3.39732	-0.769381	0.351731	1.5519	1.2175	1.34361	0.628685	0.757147	2.15247	2.59023	1.09825	2.32825	2.71768	2.76326	1.59175	1.5745	3.27114	220	-0.182417	0.0224891	0.334647	-1.85997	0.262893	-1.80326	-0.0124189	-0.136321	-0.330923	0.666094	-0.914773	-0.632303	1.3312	0.822335	-0.815132	0.187297	-0.436144	0.250057	-0.668488	-0.841288	0.620781	0.766809	0.60446	0.818095
221	2.49544	3.99717	1.94893	2.42712	1.68379	1.84829	3.79287	2.80345	-0.182391	0.275545	0.758252	1.49284	-1.01099	1.87053	-0.605976	2.19954	2.44553	2.09764	2.73046	3.80351	2.97907	5.21241	1.55218	1.49813	221	-0.646632	1.57355	-0.112601	-1.3125	NaN	-1.28813	1.19535	0.591291	0.184206	-0.647443	0.952644	-1.33384	0.348146	1.10042	0.142304	-0.103608	-0.803219	NaN	-0.253135	0.857602	-0.211952	0.158636	-0.217677	1.83771
222	2.01718	3.24287	1.41567	3.33815	2.29832	2.93119	2.26116	0.587672	1.58899	0.191305	1.51159	1.93789	-0.557301	3.1475	0.402295	2.3191	1.40919	1.04082	1.81244	3.34301	2.85572	1.06151	2.33609	-0.534278	222	1.85016	1.68749	-1.5236	NaN	-0.357165	0.403333	0.453683	-0.306221	0.0956148	-0.323089	0.783771	-1.4215	1.60394	0.0306386	-0.547574	-0.397425	-1.16487	-0.391154	0.374489	0.952175	-0.492548	-0.394626	-0.168703	2.02536
223	0.376495	2.59774	1.49473	2.59635	2.71653	2.63659	4.71363	2.37611	0.291083	-1.2255	-0.499583	1.90047	-0.076557	1.79136	0.886522	1.77083	-0.00817168	1.29282	3.58646	3.2878	2.95656	2.36933	0.843846	-0.470138	223	2.26848	0.771987	NaN	-0.99832	-0.580564	-1.30615	-0.273596	0.229311	0.695121	-0.455939	0.439605	NaN	1.06686	-0.0548453	-1.27868	-0.557762	-0.550562	1.84717	-0.125262	0.575755	-1.42502	0.186118	-0.355318	2.20395
224	0.779105	3.46353	0.837218	1.5651	2.30491	2.70008	2.48698	0.646096	2.97176	0.821249	2.16426	0.528004	1.22733	1.41519	-1.10942	1.53002	1.53986	1.01973	3.14628	2.23421	3.28839	2.6938	1.56845	2.61606	224	0.399158	1.39074	-0.248481	-1.16299	-1.58886	-1.88251	1.62018	-0.505306	0.914006	0.265798	-0.870587	-1.25678	1.36705	0.998634	-0.554501	-0.944434	-0.972274	-0.502687	-0.166858	-0.462971	-0.837671	0.580125	1.08284	1.11523
225	1.13329	-0.116118	1.44606	1.39691	3.40536	1.76185	2.31988	0.952383	-0.574727	-1.30681	-1.18599	0.825322	2.01334	0.644883	3.10753	1.47073	1.84963	0.167457	3.38973	3.26434	1.31466	1.21735	-0.444955	0.715255	225	0.568025	1.01719	-1.41032	NaN	-0.0901198	-1.39224	0.787684	1.07669	-0.757638	0.442763	0.754084	-1.59216	2.12576	0.424798	-0.825088	0.771114	0.00362307	0.278276	-1.66443	-0.640743	-1.26679	-0.153137	0.565112	0.602098
226	1.86642	3.13495	0.661591	1.55426	2.59396	1.78421	2.26415	1.15672	1.22486	0.931335	1.91896	0.920518	-0.70965	2.73747	0.298016	1.28933	2.52747	0.0637362	2.90204	2.39449	2.88501	2.14864	1.14966	0.0514892	226	0.792522	2.13185	-1.87102	-1.74907	-0.594455	-0.290763	0.0610781	1.59273	0.914154	-0.756871	0.0520032	NaN	0.233089	-0.877368	-0.418371	0.480386	-0.575312	0.659554	-0.950285	-1.02532	-1.61522	0.338659	-1.17613	1.69693
227	1.06671	3.896	1.14528	2.98933	2.04645	3.57479	2.78825	1.84097	1.99869	-1.17684	-0.61025	0.113004	0.570096	-0.564684	-0.499156	2.14705	1.58494	2.20155	2.03424	2.82329	2.05389	1.11906	0.100605	-1.16352	227	0.58907	2.2999	-0.384139	-1.30454	-0.306459	-0.840508	0.59644	0.695158	-0.566622	1.40798	-0.214734	-1.76171	0.710465	-1.08221	-0.181866	-1.55607	-1.0816	-1.73677	0.332438	0.539116	-1.07447	0.452671	2.51983	0.734968
228	0.525169	2.95693	0.639102	2.19734	1.72633	2.89911	2.93969	1.65777	-0.97664	-0.23995	1.20737	2.5232	-0.382094	2.91098	-0.641055	0.539842	0.794841	1.66059	2.33144	2.82808	1.65072	2.0925	0.42603	0.110193	228	1.5529	0.646387	-1.92601	-1.10598	0.316792	0.164093	-0.736701	-0.168108	-0.427649	-0.211405	-0.815457	NaN	1.87648	0.347886	-1.73721	0.379821	-0.590364	1.11761	-0.194156	-0.259785	0.4288	0.504916	0.664124	1.40512
229	1.56044	0.246992	1.29095	3.49259	1.72261	1.0769	2.39022	2.5968	0.986827	0.812039	1.32871	-0.845319	0.141193	1.63216	0.51637	1.44293	0.734029	0.233562	2.75797	2.81197	3.29007	2.12882	0.59177	0.0381085	229	1.46471	0.51818	0.24486	0.435181	-0.773166	NaN	1.15144	0.879985	-1.59134	-0.621684	-0.36579	-1.52913	1.64644	0.572971	-1.64708	-0.57349	-1.68047	0.0149038	-0.527	-0.309819	-0.314329	0.704522	-0.270221	2.30927
230	1.40201	0.637076	2.18276	1.95614	2.46796	1.44806	3.0339	1.1109	0.493652	0.927894	0.626128	0.0845402	NaN	-0.372493	-0.530616	1.55737	-0.329918	-0.238625	1.71705	2.69655	2.24944	1.02122	-1.08759	-0.256059	230	-0.887988	1.63903	-0.650634	-0.533479	-0.00513965	NaN	0.108965	1.25051	1.69396	0.762616	-0.11083	-0.712811	-0.00793791	-0.0473551	0.426171	-0.177611	-0.193714	2.14686	0.700494	-1.26927	-1.26123	-1.82581	0.627198	2.65983
231	-1.29847	1.55884	0.776461	3.11395	2.52341	1.80019	4.54243	1.39075	0.224091	-0.571542	-0.312083	-0.0803252	-0.0114249	0.340234	-0.313245	1.27511	2.22228	0.309431	1.58217	3.15991	2.20461	-0.0792225	0.71413	1.52055	231	-1.05205	0.533973	-1.41535	-0.626986	-0.102847	-1.0821	0.664293	0.897487	0.773834	1.16486	NaN	-0.7675	0.860171	-0.188354	-0.863998	0.75276	-1.54962	-0.303813	0.639743	-0.21457	-1.78935	-0.096227	0.74709	2.2296
232	0.307264	2.05881	0.964871	2.49028	2.01251	-0.351082	1.98396	0.669644	0.95615	1.02616	-0.744313	-0.513517	-1.12634	0.0988952	0.797172	0.673166	-0.85689	0.822186	2.35407	3.00767	2.60619	1.18378	1.51096	1.8915	232	0.0305669	-1.00946	1.00947	-0.932609	0.143234	-1.00315	0.237241	-0.0821944	0.144603	-0.198894	-0.346511	-1.36824	1.17828	0.462115	0.459465	0.765785	NaN	0.507952	-0.329128	-1.15096	-1.28952	-1.16173	0.102124	1.43282
233	1.1563	2.24511	1.75014	2.96441	2.23044	1.46131	3.9683	2.14914	1.42494	0.638198	0.610512	2.57224	0.714144	0.600884	-0.263495	0.506622	-0.109703	1.4338	1.83257	2.75105	2.63562	2.33785	0.567011	0.530607	233	-0.428849	2.65344	-1.05364	0.0178471	-1.8542	-0.880836	0.712304	0.0104616	0.0700013	0.779374	-1.39353	-0.764816	0.368443	1.07008	0.0280827	0.201894	-0.886821	-0.605066	0.153566	0.579357	0.730677	-0.312253	-0.226783	1.38587
234	0.853978	1.47409	0.470709	3.15227	2.71927	3.15772	3.40224	1.86317	1.47477	0.110508	0.493049	2.08182	0.9103	1.83058	-0.46525	0.45166	-0.192046	-0.879846	1.84895	1.36158	1.95044	1.16601	1.68236	0.674508	234	-0.247084	0.627317	-1.90042	0.183699	NaN	-0.233672	0.320625	-0.172548	-0.751457	-0.553712	-0.565573	-1.59696	0.688486	-0.142051	-0.455382	0.743711	-1.25614	0.751646	0.320476	-0.513004	-1.32937	-0.0879382	1.56871	2.03181
235	0.810993	2.91825	0.225619	0.605153	1.03712	1.99548	3.19938	0.528721	-1.81254	-0.633169	1.41943	1.98796	0.53646	0.665804	-0.612764	1.07489	0.386195	1.62866	2.30404	2.94256	2.30322	1.37246	-0.0177294	0.739918	235	0.259576	1.21335	-0.449107	1.08258	-1.87174	-0.473679	0.193351	1.77436	0.481175	-0.815002	-1.27299	NaN	1.08633	-0.157984	-0.772676	-0.134912	-0.109205	-1.00666	0.355692	1.06317	-0.852585	-0.0828785	1.779	2.43921
236	0.484537	2.03497	1.60793	0.97874	3.70917	-1.60449	3.03015	2.16098	0.115348	0.75806	1.26201	-0.64203	-0.636782	0.558611	-1.24534	0.420712	1.84217	0.271026	2.60534	1.31743	3.22104	0.650712	1.98438	0.646901	236	-0.936196	0.851692	0.27134	-0.915805	NaN	-0.0467433	-0.649415	-0.0067905	0.55296	1.40637	-0.807867	-0.810481	-0.103418	0.0863229	-0.250655	0.55674	-1.03008	1.30312	-0.426052	-0.534088	-0.194976	-1.04215	0.372027	2.78713
237	-0.00815174	1.18758	0.150436	3.2645	2.47268	0.919044	3.68172	0.886539	0.370581	-0.840458	1.27002	2.42999	0.736823	1.28217	-0.55584	0.91201	3.13215	2.21621	1.09658	2.59382	2.33557	0.622653	1.25996	-0.743798	237	1.47707	1.03346	-1.28374	0.223496	NaN	0.762335	0.463102	0.941062	0.874229	-0.200904	-0.309662	-0.89664	0.80207	-0.419671	-0.40896	2.42007	NaN	-0.228612	-0.609254	-0.589767	-1.2246	-1.40889	-0.565042	0.963932
238	0.814537	1.08695	0.636	2.09078	2.47778	3.28692	2.22511	0.555101	0.420722	1.33762	0.973603	2.31779	-1.31515	0.595609	0.926531	0.813474	1.22568	1.44665	1.89994	2.51047	1.91764	1.20743	2.18079	0.566931	238	1.41916	1.65547	-1.05323	-0.47595	-0.583892	-0.111032	0.309692	-0.227634	0.572033	0.0217447	0.522341	-1.96348	2.23189	0.86595	0.180194	1.05745	-0.230317	0.706661	0.429678	-0.35974	-0.843506	-0.0397862	0.351309	-0.149121
239	0.723418	1.0807	0.79757	2.69915	1.12276	2.10421	2.71413	0.790444	1.36373	-0.831576	1.00148	2.06779	-0.293355	3.44616	1.00749	1.09293	1.79438	2.26977	3.01269	3.19847	2.79646	0.470888	0.597642	0.159376	239	0.208611	1.35689	-1.98293	0.835425	-1.40818	-1.06524	0.189039	-0.617145	-0.669969	-1.3727	-0.920483	-1.62145	1.53496	0.120129	-0.0022074	1.35536	-1.27853	-0.0292771	-0.502748	1.00454	-0.445907	-1.07329	0.966719	0.328259
240	0.525665	1.08445	-0.333221	2.23931	1.89217	2.26479	3.01428	1.80169	1.57274	-0.233237	0.568682	2.23665	0.670905	0.293772	-0.025558	0.88579	1.51884	1.29009	2.39727	1.93811	2.08076	0.520416	-1.46795	0.416715	240	-0.454725	0.925287	-1.13446	-0.161407	-1.60718	0.0450333	1.27602	-0.659014	-0.15768	0.234085	-0.0311751	-1.85712	0.398712	0.479823	0.47224	0.342872	-1.49842	1.32278	0.330537	-0.411017	0.671612	-0.76778	1.18723	1.15065
241	1.26943	1.5459	0.859531	1.9274	0.842201	1.07982	1.62064	2.35775	-1.18464	0.820201	-1.60679	0.311555	-0.36315	1.67087	-0.472882	0.36827	1.16094	-0.344809	1.73974	2.07468	0.983421	0.53421	0.560079	0.772602	241	-1.03537	0.729831	-0.932011	-0.108191	-1.02095	-0.443924	0.957833	0.581115	0.965899	-0.47681	-0.329516	NaN	1.5919	0.782497	0.0947051	-0.553272	-0.9673	NaN	-0.793058	-1.0357	-0.779888	-0.658435	-1.36861	2.11489
242	0.331755	-0.0914536	0.50303	2.08297	0.22707	0.980029	2.41355	1.31723	-0.719508	-1.2561	0.652231	1.55149	0.592493	0.180735	0.452312	0.433695	0.384816	1.05657	1.51938	3.13946	1.16834	1.41993	-0.187197	-0.491425	242	0.570131	1.68641	0.17968	0.721309	-0.993982	-0.00595518	1.14864	-0.464627	0.450953	1.88319	-0.0286041	-1.70872	1.46571	0.236255	-0.0438991	1.30202	-0.457548	-0.509046	-0.564258	-0.117844	-0.172001	0.296019	-0.64026	-0.0461356
243	-1.31228	1.44169	1.19164	3.92888	0.982085	1.47605	3.03725	0.161052	-1.39096	-0.215719	0.126516	1.44036	-0.962799	0.903234	0.445319	1.61833	1.98052	1.73999	1.17869	1.41624	2.21972	1.57064	0.849059	1.40825	243	0.656629	0.677868	0.323748	-0.251316	-1.659	1.65246	-0.391891	1.92967	-0.423689	-1.05524	0.288716	-1.49404	0.772725	0.187956	-1.07568	1.65387	0.374562	1.61484	0.873487	0.725812	-0.247889	-0.185062	1.37504	0.869177
244	-0.921508	1.88472	1.08836	2.19037	-0.176195	-0.00948529	2.15339	2.16687	1.24577	-0.946502	-0.169788	0.873673	1.49574	1.74491	-0.585485	0.450563	1.03034	2.26307	2.19969	1.98155	2.41344	1.92217	-0.43425	-0.740537	244	-0.774756	0.117854	-1.84595	1.11149	-0.613783	0.442381	-1.28237	0.719994	0.885675	1.27891	-0.37451	-1.92977	-0.45434	0.215048	-0.580059	-0.404364	0.133022	-1.69573	0.816874	-0.818371	-0.974115	-0.695152	2.48954	2.75902
245	-1.03716	0.152528	0.232435	0.733172	2.21136	1.01418	3.0651	2.09001	2.79833	0.21474	-0.334459	-1.91025	-0.0749262	2.8093	0.184872	1.66988	1.23015	0.622061	1.91248	3.10995	1.08882	0.679532	1.97918	-0.343955	245	0.482266	1.81861	0.121447	0.12992	-1.26183	0.258388	0.762475	2.35635	0.786594	-0.873606	-1.7795	-1.73736	0.970375	1.1228	0.183019	-0.830089	-1.48567	-1.37498	-1.05993	-0.0772429	1.00084	0.694307	1.21474	1.69489
246	0.599424	2.65054	0.286323	1.5309	2.73924	1.61362	3.15129	1.88015	2.29361	-0.240419	0.0921721	-0.25253	0.58323	0.172998	-0.348102	1.25045	1.2254	0.748188	2.16388	1.53548	2.14874	0.923913	-1.0548	-0.322021	246	2.19153	0.329655	0.48691	0.596278	-0.341936	0.95307	NaN	-0.489745	0.672944	-0.0461518	-0.446816	NaN	-0.737691	0.152954	0.266496	-1.60805	-0.489035	0.817964	-1.2028	-0.471613	0.268583	-0.692657	-0.0575542	1.24393
247	-1.54433	-0.288392	-0.205263	2.26493	1.24955	1.75479	1.00373	2.11987	-0.668804	-1.30921	-0.270377	-0.171105	-0.424523	0.728144	-1.28063	0.0557898	1.80613	0.97353	2.44511	2.15842	1.57067	1.65807	1.85911	0.130507	247	0.8316	2.32913	-0.793387	-1.25895	-0.825536	NaN	0.253057	0.955121	-0.313341	1.07726	-0.698009	-1.43767	0.950505	-0.585904	-0.017284	-0.956899	-0.875216	-1.22005	0.0157406	-0.872607	0.848098	-0.284651	0.0919107	2.34659
248	-0.896724	1.27877	-0.523956	2.98823	1.48964	1.58465	5.5867	-0.0596295	-1.78508	-1.01341	-0.0531507	-0.136575	0.271373	1.25408	0.899408	0.224281	1.27114	1.61209	1.39567	2.71645	0.629983	-0.19948	0.6198	1.33398	248	1.09508	1.19438	0.50001	1.43972	-1.41477	-1.7459	0.855234	2.0092	0.737314	0.776931	-0.496435	NaN	0.378211	-0.584712	-0.519959	-0.772834	-1.26502	0.0656157	0.344297	1.82952	-1.14315	0.155946	0.771762	1.58422
249	-0.0987598	0.833197	1.52987	0.269022	1.15976	2.94746	0.994761	1.28679	1.16203	-1.32071	0.583032	1.09542	0.307905	0.551959	0.225917	0.0574317	2.38257	2.22915	2.51421	1.48539	1.25262	2.30351	0.148255	-1.01488	249	1.97258	1.19466	-0.225408	-1.83891	-0.704755	-1.80064	0.300724	0.798456	0.211503	0.300894	0.368003	NaN	0.712224	0.305108	0.219001	1.95238	-0.69405	1.45672	-0.839907	0.00274479	-1.73441	-1.2254	-1.15618	2.11448
250	0.628231	2.83039	0.876981	-0.518902	0.738586	1.13356	3.68322	0.361828	-0.134675	-0.779209	-1.30442	1.17486	0.61235	3.01702	1.0594	0.810679	0.854388	0.642227	1.86013	2.03227	2.60117	0.0332341	2.37022	0.702023	250	1.9103	0.862183	-0.163749	NaN	0.603219	-0.977441	-0.205516	1.1315	-0.087861	0.767337	-0.724538	-1.92563	1.00367	0.426813	-0.695704	-0.482056	-0.707009	0.029778	0.00135261	0.295445	-0.255466	1.34155	1.16717	2.12028
251	1.20877	1.28022	1.32782	1.33256	0.641266	1.04969	1.3104	1.4815	0.272651	-1.40522	2.51109	NaN	0.187177	2.34897	0.174814	0.22047	0.926319	1.53076	2.27892	1.51547	1.61255	0.473695	-1.86009	0.966122	251	1.03533	0.0926803	-1.1235	-1.59044	-0.0971259	-1.40528	0.270443	2.17297	-1.42258	-0.276782	0.16005	-1.89941	0.152562	0.246124	-0.13081	0.533313	0.251046	-0.598977	0.866861	-0.104341	-1.42995	0.0420188	-0.818561	0.435692
252	-0.41229	1.24296	0.712681	0.642596	1.57539	0.476464	2.39873	1.34649	-0.434306	-0.690852	-0.296025	1.39221	-0.640656	2.15582	0.267233	0.816776	-0.0481682	0.746773	1.15916	1.62464	2.4922	-0.408509	0.00567235	-0.243214	252	1.61139	-0.516302	-0.319618	-1.70433	-0.495057	NaN	-1.01187	0.176956	0.192328	0.0552709	-0.566168	-0.69253	1.02573	0.776645	0.0733774	0.0460322	-0.633635	-1.24171	0.484623	0.678192	0.912714	-0.671323	-1.88799	0.407688
253	0.900764	2.66699	-0.179779	2.06268	1.94494	0.26385	1.83255	0.6586	2.92687	0.222012	0.133427	1.06409	0.309939	2.7202	0.690789	1.3399	1.62887	1.20841	0.670938	2.07614	0.237608	1.98219	0.26152	-0.373046	253	1.64018	1.24926	0.56873	-0.487106	0.88916	-1.89178	0.93409	2.29092	1.82372	-0.0517307	-0.0227308	-1.43516	-0.219839	0.125784	-1.41812	0.657385	-0.304601	-0.147361	-0.285918	-0.569912	-0.560524	1.40966	-0.284958	2.96947
254	-1.98618	2.2027	1.17443	1.0543	1.54664	0.200567	0.844191	2.10731	0.82724	-0.761886	0.44483	0.499858	-0.775153	0.309888	0.304699	1.25375	1.47481	1.49063	1.44372	2.04527	1.15023	0.881811	-0.228532	-0.479199	254	0.347143	2.26844	1.00515	NaN	0.315683	NaN	0.546895	-1.17631	1.79346	0.55454	1.07319	NaN	1.44651	0.200224	-1.21553	2.02344	-0.859087	0.292221	-0.449199	-0.652656	-0.323851	-1.32646	0.566205	1.06508
255	0.643996	0.93002	2.17658	1.57112	1.33546	0.732025	3.71321	0.173765	0.156594	-1.55749	-0.32052	-0.535787	-0.0338781	0.598936	-0.568001	0.42699	1.67945	-0.138025	0.0627555	1.56467	0.419146	0.921103	-0.885225	0.129096	255	1.90189	-0.672563	-1.01197	NaN	0.785298	-1.12779	-1.34267	0.249169	1.5495	-0.194377	-1.05675	-1.50494	0.890239	-0.584062	-1.17812	2.51894	-0.253595	-0.757577	0.0152483	-1.43887	0.324573	-0.271422	-0.102624	1.92782
256	-0.262541	-0.219273	1.0461	2.78253	3.61453	0.692074	3.57158	0.562469	-0.511252	0.501046	0.270379	0.726895	0.0199396	0.381248	0.498354	0.81564	0.732247	1.63011	1.01209	0.512162	2.91844	-1.05699	0.993742	-0.229762	256	0.0644869	1.76285	0.0914192	-1.79941	0.462298	NaN	0.442625	0.895855	1.52103	0.70201	-0.311056	NaN	-0.210327	0.153362	-1.27979	0.410947	-1.50771	-1.22711	-0.409293	0.56379	0.172009	-1.71745	0.316522	2.77288
257	0.0566966	1.27607	0.916386	1.21101	0.874872	0.695736	2.04163	1.47655	1.50907	NaN	-1.77082	0.7859	1.08614	1.46045	2.65423	0.0347489	-0.370963	1.1168	1.00844	2.71701	2.03166	1.53874	1.64155	-0.714796	257	1.49077	2.05754	0.777894	-0.122241	-1.06537	-1.64402	-0.550598	1.12115	0.744532	-0.708358	-1.43923	-1.43902	1.35018	-0.0603392	-1.41786	-0.292739	-0.382035	0.83869	-0.364775	-0.433442	-0.468137	0.334542	0.282302	0.107453
258	0.152742	0.923365	0.824615	1.7043	0.146523	0.68446	3.23219	-1.55413	1.56594	-1.12822	1.30516	0.738083	-0.87932	-0.43267	0.210216	0.54704	1.19891	0.880673	1.90433	1.65939	1.55741	0.945511	-0.748854	0.698912	258	-0.597743	1.57398	0.804768	-1.3998	-1.84093	-0.718363	-1.14605	0.112239	1.61284	0.740375	-0.510993	-0.293811	0.851946	-0.544076	-0.014373	1.00398	-1.05653	-0.422029	-0.130714	-0.292862	-0.857129	-0.161647	-0.435152	0.72336
259	-0.418872	2.20053	0.0980258	2.6514	0.956071	-1.65321	2.68531	1.70603	1.04599	-1.1078	-1.02553	-1.139	-0.79403	2.46903	0.717285	-0.0825445	0.497766	1.71302	1.65104	1.88189	1.20151	0.28205	0.779294	-0.840918	259	0.510089	1.10353	0.471585	-1.57805	NaN	-0.237057	0.0696967	1.3603	0.492258	-0.869503	-0.836405	-1.16257	1.21886	0.886195	-1.38648	0.311441	-0.465055	0.313297	0.75371	-0.0731325	0.780208	0.674221	1.27604	2.65401
260	-1.13306	1.12828	0.312638	2.25592	-0.0770859	0.922669	1.54938	1.34512	1.74688	-1.40692	-1.11255	-1.03207	-0.417747	0.292953	-0.523035	-0.557063	1.28328	2.50194	1.55332	1.66776	1.16582	0.522194	0.416195	0.416004	260	0.423076	0.868743	0.128357	-1.10721	-1.99305	-0.932894	-0.201085	1.45906	-0.69136	-0.0409734	-1.93325	-0.299336	0.566602	0.798968	-0.501472	0.594815	0.342894	0.412473	-0.767322	-0.820204	-0.909827	-0.879717	-0.13347	1.53787
261	0.609716	0.723145	0.480342	0.074233	-0.63449	2.43903	0.905858	-1.05046	-0.0434123	-0.990967	0.915176	0.11832	1.25629	-0.371587	0.652037	0.591611	0.678873	1.92861	0.0840283	1.512	2.64637	-1.4766	-0.627083	-0.851556	261	-0.076535	0.376488	-1.3576	-0.8971	NaN	0.380244	-0.436628	-1.14946	0.33649	0.584383	0.140627	-1.1145	2.69375	0.272085	-0.535789	-0.703529	-0.00335935	-0.223498	-0.382508	-0.334868	0.407588	-0.222826	-0.18589	0.982743
262	-1.3067	0.466391	1.28903	-0.314782	0.244019	1.1727	2.7186	-0.443563	-0.126091	-0.996008	0.204037	-0.0547489	1.69412	0.754953	2.21593	0.398585	1.05511	1.98745	0.801592	2.60586	1.51014	0.679866	-0.538006	0.483673	262	1.44109	-0.152696	0.851011	0.0407323	-1.13244	-1.50064	-1.14345	0.443679	-0.093889	0.0492383	NaN	NaN	1.44727	0.37633	-0.360179	-0.199174	-1.45145	2.03973	-0.995683	0.349472	0.167169	0.730935	0.0995084	-0.315037
263	0.0350941	0.165082	1.118	0.506453	1.41052	-0.143324	3.01619	-0.698243	-0.645353	NaN	0.590859	-0.608877	0.167482	-1.15416	0.440288	0.620394	-0.800843	1.32724	0.320924	0.388361	1.56616	0.0679786	-0.0441761	0.138888	263	0.946106	1.15777	-0.0672826	-0.739394	-1.1108	-1.41664	0.286736	0.149043	-0.238207	0.490421	-0.38382	NaN	1.50515	-0.052054	-0.364567	0.0469544	-0.620452	-0.227735	-0.342148	-0.629377	-0.843159	-1.14994	0.964609	1.65961
264	-0.263216	-0.224261	1.56188	1.02403	0.284707	-0.0438681	0.243735	0.842287	1.70997	0.429644	-0.0874146	-0.416853	2.06939	1.55916	0.58255	0.0057557	1.05279	1.68733	0.937452	0.664328	0.163449	-1.96028	0.556138	2.72474	264	0.0978753	2.3312	0.515548	-1.23764	-1.04292	0.131597	0.313536	1.73422	0.842288	0.526796	0.0987106	-1.50082	-0.0985878	0.232263	0.16825	-1.07859	-0.632182	0.251941	0.0297648	-0.527495	-0.613795	1.5895	-1.34533	1.18794
265	-1.90588	0.539429	0.410828	1.05755	2.74417	1.5068	1.90652	1.28718	-1.60023	NaN	1.71237	-0.0433552	-1.60363	2.86222	-0.243354	1.08691	-0.65669	-0.351391	0.0696342	1.53376	1.11841	0.302926	0.642183	-0.412789	265	-0.110666	1.02772	-0.188132	-0.348213	-0.856158	-0.499633	0.555127	1.45766	0.149445	0.255932	-1.97121	-0.379816	0.550319	-0.320228	-0.00130643	-0.866555	-0.960914	2.20837	0.87509	-1.50064	-0.191443	-0.566862	1.07106	1.23238
266	-1.75422	2.05419	0.988488	-0.283722	-0.630774	1.15092	2.53605	0.194638	-0.420317	-0.656222	-0.772859	0.214228	-0.00810094	-1.00856	1.31759	0.0724709	-0.62636	1.02894	2.55927	1.16741	1.52367	1.75936	1.39347	2.07816	266	1.27054	0.33988	0.49986	-0.0455054	-1.08375	-1.27764	1.43378	2.48642	0.128003	0.0623741	0.240026	-0.0530004	-0.277936	-0.395012	-1.16336	NaN	-1.26675	0.156581	-0.588812	-1.17113	-0.0570307	1.04376	0.0723851	1.3837
267	-1.86775	0.248829	-1.55218	0.391527	1.04789	2.18415	0.952571	-0.223961	-0.297319	-0.254352	0.731202	-0.270043	0.439883	1.53074	2.13133	-0.932141	0.867767	1.44473	2.06561	3.22866	1.49503	1.09132	0.400233	1.41601	267	-0.591894	1.96935	-1.2762	-0.257278	-1.09676	-1.8025	0.454714	1.8036	0.593749	0.553828	-1.76085	-1.30501	1.40656	0.930824	1.07417	-0.585215	-0.370299	1.3333	-0.168725	-0.636027	-0.287715	-0.467767	0.185895	1.63863
268	0.123798	0.637089	1.3468	2.52903	0.162149	-0.276251	-0.859404	-0.759632	-0.15434	-0.706057	0.499195	-0.89722	0.771987	-0.247658	-0.738082	0.892758	0.840141	2.16653	1.15454	1.47666	0.951773	1.68861	-0.908918	1.54092	268	0.432157	0.376698	0.822209	0.457883	-1.0541	0.141434	0.893716	1.2306	-0.602985	0.268152	-0.138278	-0.507148	0.095264	0.503617	0.162761	-1.28961	-0.242871	-0.315926	-0.59677	-0.157314	0.208777	-0.363245	0.195149	0.882144
269	0.170071	-0.592736	0.253979	0.932516	1.45252	0.135068	1.92905	-0.171737	0.689824	NaN	0.491346	-0.996013	0.823385	-0.60881	2.71619	-0.355634	0.554902	0.277898	1.24791	1.4961	0.774337	-1.97677	0.433939	-0.85127	269	0.329658	-0.288254	0.211301	0.290481	-0.753933	-1.06018	1.03267	1.96176	-1.49729	1.03481	-0.709704	-0.13109	1.39564	0.546623	-0.0229199	-0.809491	-0.669709	0.378527	0.24828	-0.583212	-0.00692543	0.358871	0.205845	1.0005
270	-1.37729	1.87089	0.952406	1.70549	0.594267	0.79839	1.17348	-0.639932	-0.494287	-0.704986	-0.269578	-0.854957	1.65932	0.635998	0.61358	-0.0155919	0.849103	0.446646	1.60111	1.09398	2.36668	0.662192	0.250831	0.884943	270	1.04165	-0.269172	-1.15012	-0.146668	-0.997566	-1.33921	1.26108	1.0599	0.164213	0.407985	-0.218667	-0.957311	0.635	0.503987	0.667997	0.199134	-0.466036	1.03826	-0.425839	0.630879	-0.699256	-0.197822	1.24744	0.387327
271	-0.782046	0.257164	1.53413	0.999144	2.02676	0.811181	2.51022	-1.14794	-1.84083	-0.608796	-1.89223	0.0483274	1.1687	0.528537	1.2947	-0.206291	1.23233	2.56762	1.83517	1.20281	2.5889	0.779164	0.107953	-0.89306	271	0.926773	0.457313	-0.0664512	-1.33316	0.0118347	0.308927	1.95451	1.58489	-0.0396314	-1.59335	-1.02204	NaN	0.951372	0.838313	-0.521129	-1.4283	0.468245	0.604302	0.392212	0.995762	0.693587	-0.356058	0.168271	1.2018
272	NaN	0.609885	0.339506	1.47435	1.80453	3.23027	2.27135	-0.0509028	1.76887	-1.0375	0.290008	2.48016	1.69094	-1.36761	0.627695	0.373506	0.110889	0.00511961	1.1031	0.470199	1.24377	0.462947	0.41174	2.57941	272	0.626494	1.46587	0.517982	-1.03125	-1.722	-1.2719	1.03012	-0.939753	0.0913612	-0.408448	0.0380719	-1.38391	1.24882	2.17141	-0.125514	-1.19251	-0.0237379	-0.589928	0.593367	0.61352	-0.342934	-0.103576	-0.494958	1.22097
273	-1.58626	2.64244	-0.124935	0.951187	2.55623	1.77033	0.37965	1.00071	-0.455536	-0.00233972	NaN	-0.628675	-1.28113	0.898513	-1.59334	0.310931	-1.29109	1.92179	1.54065	0.111602	0.826847	-0.565642	0.0364003	0.495391	273	0.39807	0.168665	-1.90554	0.183013	-0.575425	-0.828191	0.544843	1.87915	-1.55738	-1.81314	-0.493662	-1.41238	0.880951	0.994692	-0.0163901	2.11652	-0.709463	-1.10594	0.610432	-0.898424	0.773775	1.23192	1.51601	3.39353
274	NaN	0.0484694	-0.620793	1.44759	2.9007	0.790442	2.7908	-0.942881	0.244808	-0.290659	0.421869	-1.08779	0.787432	-0.148116	0.982275	0.0445537	-0.517879	1.41038	0.826554	0.24931	1.51069	0.473108	1.18566	0.361409	274	-0.101042	-0.817786	0.66242	0.627478	-0.767107	NaN	0.581477	-1.46349	-0.858106	1.32489	0.756199	NaN	0.94302	-0.333033	-1.03579	1.50934	-1.68622	0.282085	-1.56218	-1.13192	0.327718	0.6109	-0.4572	1.25363
275	-1.99649	-0.079729	0.0250823	2.02265	1.33526	1.3149	0.579678	2.97351	1.40123	-0.653092	-0.696247	-0.658301	2.46895	-1.39137	0.475744	0.0334223	-0.86878	-0.439109	0.0785353	1.31868	1.5874	1.29048	-0.9024	1.27123	275	-0.176227	1.14342	0.578841	0.612052	0.446541	NaN	-0.190171	0.321967	1.17857	0.925362	0.882618	0.679539	0.538605	0.777636	0.280534	0.248769	-1.53029	-1.43431	0.540179	-0.47375	0.0608627	-0.384862	-0.137448	1.88709
276	-1.74419	-0.0817998	0.618841	1.93777	0.581907	1.35722	2.3298	-0.996184	0.680275	0.054095	0.21088	1.33627	1.01434	-0.418572	1.35851	0.480966	0.889816	1.31181	0.643238	0.678659	0.922702	0.686067	0.460178	1.52273	276	2.03258	1.39687	-0.303604	0.543037	0.755718	-1.96085	1.27092	1.54524	-0.15846	-0.126145	-1.72813	-0.953412	1.3933	0.882543	-0.553645	0.701036	-0.597483	-0.377307	-0.40332	-0.160811	-0.358393	-1.82433	-1.1177	1.81721
277	0.694889	0.996231	-0.623608	1.44267	3.66406	1.34712	2.97438	0.706092	-0.00861357	-0.456858	0.232703	-0.650943	1.40723	-0.396352	1.62614	0.325164	-0.170027	0.679355	0.385721	0.300412	0.829593	1.44908	1.56307	0.733363	277	0.714397	1.33547	-1.26526	-0.97298	0.121161	-1.64913	0.254412	0.398352	0.706937	1.04001	0.428797	-1.39999	0.920363	0.630696	-0.77594	-1.50995	-0.619858	0.416414	1.35204	0.968372	0.392572	-0.886104	0.841871	1.40475
278	-1.5437	0.286583	0.0242283	1.50379	1.12044	0.0740376	3.65923	-1.02514	0.189055	-1.11554	0.550384	0.937228	-0.57396	-0.455454	0.297436	-0.326928	0.870739	0.285768	-0.216648	0.0193848	1.28401	0.0153141	-0.665288	1.80775	278	1.90937	2.24347	-1.51886	-1.03587	-0.217759	-1.70465	1.42463	2.1513	-0.326444	0.314353	-0.22198	-0.307668	1.25488	0.461912	0.646854	0.352162	-0.968548	1.11167	-0.0448801	-0.917452	0.286027	1.33045	2.04892	0.36443
279	-0.972928	1.83604	-0.225108	0.84962	2.50254	2.28993	1.48582	1.50166	-0.025096	-1.21109	0.370123	1.73261	-0.305044	0.604834	1.55065	0.974894	1.26718	0.704456	1.38301	0.620418	0.637056	-0.792993	-0.203284	0.876693	279	0.936635	-0.521999	-0.353121	0.154625	-0.497478	NaN	-0.0388256	1.0298	0.25834	-0.0704527	-0.247739	-1.25854	0.435401	0.862494	-0.600828	1.19055	-0.439414	-0.345088	-1.2416	-0.970538	-0.81673	0.595309	1.28663	0.923216
280	-1.02238	1.30291	-1.06376	1.69191	3.32412	0.171764	1.93093	NaN	-1.35564	-0.438251	-0.070873	-1.84185	0.690392	-0.490081	0.522788	0.335583	-0.154893	2.318	1.28441	0.798174	0.74755	2.26263	-0.749527	-1.05785	280	0.367198	0.470302	0.372592	0.451365	-0.155542	-0.319318	0.302622	1.78447	0.209314	-1.51911	0.804537	-0.831816	-0.678718	0.554037	-0.0900082	-1.39134	0.0359729	-1.74976	-1.70092	-0.681664	-0.389001	-0.22699	0.713203	-0.412992
281	-1.54431	0.192322	-0.321072	1.55221	0.00389416	0.756325	3.06737	0.701164	0.200061	-0.890575	-0.797331	0.73177	0.944531	-0.740374	0.865088	0.442768	1.86424	0.081676	0.704156	0.709942	0.919759	-1.50565	0.650858	0.0123226	281	0.837044	-0.123902	1.21829	1.37928	-1.34762	-0.547392	-0.855823	1.53932	-0.240245	-0.398385	-0.14948	-0.601005	1.13086	1.36794	-0.887438	-0.895277	NaN	NaN	0.911854	-0.793075	0.272318	-0.0720738	-0.725677	0.763616
282	-0.238427	0.00899396	1.33326	2.02094	0.913919	3.72511	2.04613	-0.77476	-1.41674	-0.779177	NaN	0.543803	0.65905	0.175884	-0.0105499	0.442784	0.530661	-0.50577	1.38939	0.682093	1.25287	1.70345	-1.44599	1.34962	282	-0.39339	1.61552	0.234706	-0.581433	-0.349523	-1.72683	1.1457	-0.422462	1.55052	-0.573857	-0.439392	-0.00148166	1.75413	1.69978	0.46473	-0.219147	NaN	-0.624026	-0.308102	-0.2307	0.0578089	0.57769	0.0309472	1.77367
283	-1.199	0.929984	0.666039	2.00426	2.5725	0.747384	1.24422	1.86727	0.934298	-1.79104	-0.280786	2.85975	-0.149723	-0.099443	-0.153751	0.0286374	1.07914	-0.0271575	1.44381	1.12694	1.48342	0.855124	1.13883	1.40959	283	0.88003	2.60824	-0.78713	1.10186	-0.831177	-0.985818	0.045555	1.10137	-1.74742	1.32959	-0.467314	-1.52895	-0.459461	1.0254	-0.808996	-0.38141	-1.4563	0.701112	0.210212	0.47904	0.0975714	-1.60552	-0.96903	2.81505
284	-0.63547	-0.591824	0.476424	1.36883	0.051385	0.632329	2.85264	0.963643	1.2217	-1.35715	-0.618977	1.37919	1.5919	-0.768702	0.49383	-0.419374	1.57016	0.895469	1.06853	1.22365	0.365393	0.97447	0.432039	-1.03164	284	2.75636	0.453889	0.641366	1.45277	2.21905	-1.40299	1.47644	0.183856	-0.749117	0.170607	0.65338	-0.568451	1.05186	0.785871	0.139328	-0.0801445	-1.11461	-1.70162	0.854456	-0.179907	0.960545	0.552223	-0.336295	0.64789
285	-1.11195	1.43201	0.622383	2.48945	-0.345787	1.35639	2.69046	2.00705	0.877989	-0.765762	-0.883782	0.876769	0.735191	1.50866	-1.49803	0.753424	0.236122	0.888493	1.23057	0.155294	1.28314	-1.79947	-0.248991	0.0504514	285	1.02372	1.48568	-0.290388	1.11136	1.25065	-1.25402	1.92301	1.04624	0.906018	-0.248722	0.250117	-1.7801	0.800753	1.34287	-0.485323	0.239697	-1.03232	0.0151872	0.250811	-0.90407	-0.141308	-0.0481484	-0.809897	1.23664
286	-0.692644	-0.616543	-0.897892	1.38603	-0.618908	1.55724	2.41168	-0.957454	-0.00376905	-1.02864	-0.0479008	1.69294	1.04334	-1.19014	0.145971	0.0327006	-0.341139	0.873581	1.2196	0.882045	1.35968	0.887643	-0.370197	-0.226713	286	0.619089	0.632326	-0.777276	0.991513	1.60166	0.285727	1.08701	0.41706	-0.867414	1.4747	0.205159	-0.733713	1.46414	0.389854	0.371353	-0.537682	-1.14085	1.47382	0.1823	-0.596496	0.455244	0.576454	-1.15475	1.26656
287	-0.625485	1.47097	-0.239987	0.556586	0.643464	1.12858	-0.776104	0.218308	-1.61932	-0.769643	-1.17808	1.76802	2.6975	0.168743	0.668118	0.614994	0.640391	0.537259	2.00548	0.696011	1.27427	-1.30318	-0.32805	2.85152	287	2.00984	0.907057	0.127677	-0.219995	-1.64094	-1.37028	0.250056	0.605875	0.467305	-0.123175	1.02566	-1.14947	0.629216	0.835585	0.127551	0.989574	0.584447	1.61928	0.740323	0.240702	-0.370693	0.210088	0.232262	2.03603
288	-1.67182	0.135196	-0.0614779	1.31776	1.99238	1.42463	2.1414	-1.26057	-0.505865	NaN	0.129469	1.16958	0.94333	-0.388592	0.302072	0.601255	0.465655	1.89132	0.422382	1.81639	1.10883	1.03483	1.41613	0.367983	288	0.0781648	-0.722089	0.20201	0.421817	0.371245	-1.62461	0.927028	0.959493	0.943499	-0.926425	0.334063	NaN	0.292576	0.713467	-0.937863	-0.762037	-1.50999	0.690976	-0.553933	0.32171	0.584225	-0.399507	-0.447931	0.987273
289	0.512745	1.16641	-0.847517	-0.199901	0.905062	0.749239	1.88947	-0.197382	-1.24279	-0.305188	-1.4146	0.745266	-0.449259	-0.0559121	-0.557082	0.898724	0.564443	0.255611	0.339924	1.31495	0.374786	0.454757	0.124866	0.0232731	289	2.75564	0.35444	0.491675	-1.90106	1.22262	-0.0143743	0.648625	1.93878	-0.0480433	-0.906149	NaN	-1.79777	1.48352	0.301324	-0.37649	0.390251	-0.434996	-0.465346	-0.0693379	0.0227992	-0.433854	-1.3374	0.202245	0.493752
290	-1.2245	1.13822	0.734721	1.38702	1.36001	0.969114	0.254182	1.62668	-0.606124	-1.79927	1.17263	0.737851	0.335778	-1.5327	0.95362	-0.230323	-0.419571	0.215961	1.90941	0.303204	1.15403	1.25549	0.790471	-0.672997	290	-0.485563	0.66801	-0.678895	-1.03833	0.272821	-0.131978	-0.377236	-0.85042	-0.799034	-0.0938436	0.221917	-0.155159	0.775026	0.176375	0.279876	-0.792391	-0.0193574	0.795985	-1.50962	-0.602739	-0.254375	-0.335614	-0.607322	1.30316
291	NaN	1.25137	-0.020271	0.909084	3.38818	2.78768	2.08854	1.91571	-0.980977	0.460412	0.359692	1.00251	1.43493	-1.52882	-0.378883	0.365361	0.432819	0.0816634	-0.482936	0.468557	1.41075	0.650122	0.101929	0.438931	291	1.18954	1.11714	0.2082	-1.7457	1.56768	0.82815	0.912459	1.21688	-0.365174	0.0984951	1.40154	-0.637571	0.343777	0.678281	-0.539695	-1.06927	-0.592867	-0.148442	-0.935281	-0.743732	-1.11604	1.15648	0.482901	-0.361571
292	-0.823602	0.851008	-0.470894	0.596844	-0.513072	0.658256	-0.87208	-1.43782	0.54841	-0.608984	0.384123	-1.43207	1.47363	1.2704	0.27945	0.0304766	-0.64046	1.43003	0.735731	1.51199	2.36682	2.17224	-0.116318	0.248905	292	1.04168	0.0971997	-0.136639	-0.447972	-1.85729	1.47144	1.8287	3.36969	0.385255	1.08441	-0.774203	-0.896309	0.942449	2.1156	-0.421026	1.52182	-0.708603	-0.61509	0.139678	-1.93075	-0.0854083	-1.19366	-0.470322	1.82785
293	-1.31185	1.00361	0.276093	0.366911	-0.0555833	2.60693	3.20245	NaN	1.37651	NaN	-1.31543	-0.509579	1.18747	2.10057	0.800538	-0.25915	1.11555	0.769065	1.06356	1.57187	0.775254	1.93391	0.65872	0.190928	293	1.501	-0.312597	0.35475	-0.998783	0.454413	NaN	0.487863	2.26739	-1.55036	0.476886	-0.0614212	0.0416474	0.185242	-0.21393	1.01273	0.344326	NaN	-1.01481	-0.277522	-1.6175	-0.190627	1.01035	1.17514	-1.18473
294	-1.85379	0.258888	-0.37406	1.71348	0.108063	-0.256119	2.80709	0.219168	-1.30232	-0.48567	-0.386723	1.43273	1.07719	0.111568	-0.294588	0.736624	0.658888	-0.693634	0.538603	1.1004	1.46511	0.145577	-0.104963	1.42037	294	1.37829	-0.4687	0.288974	-1.25643	-0.227808	1.24321	1.79195	1.14795	0.622409	-0.381298	0.538478	-0.745762	0.946792	0.333587	-0.370365	-0.968156	NaN	0.730386	0.215491	-0.471328	1.09293	-0.175385	0.0985467	1.05669
295	-0.512245	0.631111	0.238073	0.55826	0.532932	0.501931	2.45629	0.284119	1.54672	-1.33984	0.314059	-0.57301	-0.0187249	0.848007	0.27641	-0.755464	0.517296	0.535017	0.648312	1.19402	1.30826	-0.00496141	0.724335	-0.769847	295	0.316062	1.18065	0.463668	-1.11697	0.0746467	0.0154297	0.859757	0.356647	-0.909944	-0.307988	-0.135114	-0.382969	1.0553	0.73436	-0.658327	0.633222	-1.81472	-1.5101	-0.518318	-0.0951311	0.102515	1.32995	-0.287993	0.299643
296	0.0601683	1.30056	-0.465822	0.978469	1.25905	1.32749	1.44985	1.20061	-0.539851	-0.839104	-0.713369	0.806422	0.159675	0.695917	-0.201006	0.0487197	0.590116	1.74216	-0.0992915	1.21884	1.56506	2.29436	-1.08309	-0.350858	296	1.8272	1.26873	-0.720135	-1.0003	0.483925	1.63469	0.00866732	3.18561	-0.300374	-0.630699	0.46774	-1.36085	1.94673	2.97236	-1.20531	1.24685	-1.62861	-1.97	-0.47032	-1.72641	0.277748	-1.34186	1.66448	0.0872787
297	-0.786991	0.0176521	-1.02769	1.00515	1.78277	0.83114	1.95111	0.838332	-0.575959	-0.314273	-0.703372	0.501222	-1.74204	0.677981	-0.872965	-1.12553	-0.257942	0.714654	-0.319913	0.404176	1.85706	-0.165262	-1.31369	-1.10453	297	-0.351748	0.117442	0.704959	-0.959345	0.789058	0.515527	0.364342	0.0742621	-1.19157	-0.406875	0.0381743	-0.841541	0.538769	1.09785	-1.2018	2.51179	-0.553314	0.290896	-0.148519	-0.608095	-0.2415	1.47604	0.538041	1.43016
298	-0.32291	1.34136	0.617162	0.889047	0.619974	0.0704267	-0.118008	NaN	-0.785445	-1.66015	-1.32626	0.797271	0.356783	-0.662736	0.532342	-0.244788	0.981534	0.382971	0.826105	0.520772	1.7123	1.20099	0.803542	-0.552626	298	0.990353	0.735663	0.942691	-0.340427	0.290837	0.321179	0.948975	1.45352	-0.421785	1.33961	0.0749934	-0.407153	0.892108	-0.905279	0.0148588	0.13337	-1.69245	-1.09808	-0.144714	0.0783682	0.244146	0.755668	1.9791	0.434168
299	-0.521593	0.163853	-0.573301	0.186356	2.09359	0.974253	3.42412	0.624904	1.19493	-0.93594	-0.922767	0.0680195	0.264277	-1.03236	1.20222	0.766549	-0.841717	1.76391	0.498376	0.87921	1.11749	1.36465	0.439599	1.67994	299	0.0340026	0.397112	-1.83659	NaN	0.666532	1.6462	1.44028	0.739759	-0.728635	0.218935	-0.477455	-0.687718	0.402243	-0.59185	-0.403892	1.02681	-1.4992	-0.547177	-0.083348	-0.36309	-0.232851	0.161649	-0.312094	1.48191
300	-0.266818	1.56622	0.316294	1.03975	0.677681	2.57924	-0.688027	-0.635481	-0.479245	-0.930411	-1.619	-0.0364603	-0.274303	-0.0735536	-0.211002	0.0419764	0.563757	0.226335	0.770876	0.475865	0.915939	0.0733795	0.156929	0.116143	300	0.568184	-0.791898	0.462763	-0.872773	0.388179	NaN	1.30048	0.659468	-1.88541	1.08366	-0.693548	-0.747436	1.53899	1.04706	-0.955997	0.506043	-1.40326	-1.13792	-1.0504	-1.37462	-0.524105	1.04896	-1.14826	0.708908
301	-0.965444	0.531994	1.21559	1.57794	1.59408	1.74494	0.0640576	-0.274723	-1.1099	-1.48215	-0.0343752	1.41119	1.04179	-0.0646348	0.280588	-0.316899	1.27335	0.951587	1.65843	0.370239	1.84429	-0.955603	1.38365	-1.30716	301	-0.35397	2.13798	0.474587	-1.74681	0.264949	2.14805	1.28166	-0.14436	-0.708742	1.10892	-0.720944	0.026197	0.0538393	1.01796	0.103727	-0.194426	NaN	0.419182	-1.30984	0.0649527	0.661962	-0.255371	0.574993	2.09166
302	-0.661243	0.888061	1.17641	0.618047	0.921579	-0.0234828	0.845312	1.83079	0.510221	-0.350096	0.391283	1.49767	-0.23922	0.620197	1.35069	-0.389428	0.400895	1.4945	0.69657	0.074382	1.34502	-0.877019	0.179369	-0.657804	302	1.58234	1.06296	0.55705	-0.716601	-1.43572	-0.119874	-0.376694	2.66183	-0.221535	0.779652	0.0441915	0.614415	0.921563	0.593233	0.0392476	-0.662772	-1.18046	-0.167441	0.280989	-0.306954	0.228137	-0.503592	0.0336004	0.536205
[truncated: 348 more rows]
[truncated: 9 more columns]

## Sheet: Fig 3C
Source Data	Figure 3A	AWC VGLUT-pH Data: individual dF/F(%) traces
		Three trials per animal: Read from left to right; Trial 1 signifies a new animal
		Acquisition Rate: 5 Frames/sec
		Stimulus ON:	Frame 25
		Stimulus OFF:	Frame 325
	wt																								unc-64(e246)
Frame / Trial #	1	2	3	1	2	3	1	2	3	2	3	1	2	3	1	2	3	1	2	3	1	2	3	Frame / Trial #	1	2	3	1	2	3	1	2	3	1	2	3	1	2	3	1	2	3	1	2	3	1	2	3	1
[truncated: 625 more rows]
[truncated: 5 more columns]

## Sheet: Fig 3D
Source Data	Figure 3B	ASH VGLUT-pH Data: individual dF/F(%) traces
[truncated: 657 more rows]

[truncated: 3 more sheets: Fig 3E, Fig 3F, Supporting Stats ]
