# Supplementary material for: Diverse modes of synaptic signaling, regulation, and plasticity distinguish two classes of C. elegans glutamatergic neurons
Source: eLife. 2017 Nov 21;6:e31234. doi: 10.7554/eLife.31234 (PMC5705214; doi:10.7554/eLife.31234)
Supplement: Figure 4—source data 1. [file elife-31234-fig4-data1.xlsx]

## Sheet: Fig 4A
Source Data	Figure 4A	AWC VGLUT-pH Data: individual dF/F(%) traces
		Three trials per animal: Read from left to right; Trial 1 signifies a new animal
		Acquisition Rate: 5 Frames/sec
		Stimulus ON:	Frame 25
		Stimulus OFF:	Frame 325
	wt																																		unc-13(s69)
Frame / Trial #	1	2	3	1	2	3	1	2	3	1	2	3	1	2	3	1	2	3	1	2	3	1	2	3	1	2	3	1	2	3	1	2	3	Frame / Trial #	1	2	1	2	3	1	2	3	1	2	3	2	3	1	2
1	4.29818	3.88705	2.62621	1.45217	1.63964	1.52313	1.61197	1.3321	2.85854	1.1734	2.45082	2.21373	1.89606	2.085	2.16106	3.08568	2.00863	1.95355	1.9975	3.18923	2.83673	3.52628	5.25767	4.07139	3.67895	5.62534	8.03755	3.4059	3.38599	2.6303	2.47168	4.41108	3.92453	1	1.01595	0.86008	2.44896	0.420608	0.367137	1.45554	1.16484	1.21646	1.55063	0.644904	0.895254	1.71424	0.886156	0.321204	0.676627
2	4.4486	4.03137	2.54371	1.18931	1.65228	1.53405	1.30503	2.02573	2.69169	1.16039	2.15038	2.23384	1.68087	1.83015	2.55709	2.98821	2.00942	1.61475	1.76278	2.59113	2.64219	2.73468	4.98432	3.95508	3.58566	5.83104	7.72258	3.16747	2.78087	3.02801	2.45546	4.09587	4.07753	2	1.17252	0.863959	2.15111	0.355901	0.462309	1.06016	1.17894	0.946718	1.1792	0.621467	0.95935	1.92855	0.651859	-0.124987	0.126673
3	4.49656	3.87131	2.63946	0.761651	1.43019	1.51612	1.54818	2.07157	2.79877	1.00308	2.50606	2.21301	1.59687	2.0371	2.11973	3.48775	2.20357	1.80173	1.56196	2.44473	2.63977	3.05821	4.89845	4.05629	3.87681	5.57492	7.88863	3.30906	2.66368	2.90199	2.71717	4.22381	3.82109	3	0.637185	0.599884	1.8428	0.515975	0.193451	0.918145	0.858834	1.17846	1.19135	1.20747	0.272758	1.36027	0.444824	0.00909867	0.877281
4	4.22688	3.68475	2.67156	1.0602	1.53975	1.82801	1.49015	2.1859	2.49639	1.31813	2.40265	2.35909	1.74942	2.15657	2.18521	3.57288	2.22255	1.70451	1.61586	2.5097	3.04212	2.97429	4.98649	4.14708	3.57992	5.6647	7.54906	3.68921	3.07631	2.98988	2.52094	4.17472	3.70124	4	1.02338	0.476752	1.52213	0.37823	0.324393	1.17567	-0.200761	0.834651	1.13516	0.94722	0.471143	1.53906	0.61209	0.272531	0.305317
5	4.74131	4.8845	2.49237	0.991718	1.12854	1.49947	1.47176	2.21581	2.48227	0.859367	2.57344	2.02471	1.71817	1.62048	2.47707	3.82939	1.95426	1.52293	1.55207	2.8833	2.88335	3.04484	4.8599	3.29598	3.45216	5.3673	7.72544	3.63241	2.939	3.01445	3.41245	4.2053	3.94624	5	1.0841	0.844174	1.32752	0.104321	0.754993	0.647098	0.842206	0.99289	1.65855	0.878188	0.143227	1.66367	1.09151	0.145245	0.154777
6	4.36579	4.32665	2.59243	1.2949	1.29365	1.51101	1.64465	1.78892	2.54764	1.13079	2.34432	2.25501	1.57712	1.87766	2.36285	3.69705	1.92348	1.70907	1.6644	2.80888	2.92028	2.20926	4.29615	3.7128	3.43118	5.53404	7.83901	3.5496	3.26457	2.9839	3.16015	4.26436	3.53501	6	0.554121	0.789621	1.68095	0.606243	0.513569	1.16038	1.35098	1.08357	1.25579	0.600289	0.623851	0.12199	0.674841	0.175147	0.341678
7	4.45049	4.20615	2.66141	0.58422	1.1855	1.33558	0.864377	1.83107	2.35033	1.37443	2.64886	2.57674	1.89698	2.14072	2.18343	3.39147	1.83708	0.520028	1.69677	3.08745	2.39503	2.85822	5.08774	3.64786	3.22803	5.47193	7.3849	4.04327	2.80208	2.3162	2.82633	4.24009	3.79958	7	0.977256	1.01409	1.55182	0.13488	-0.132868	0.923218	1.0376	1.0717	1.15951	0.376598	0.143914	0.76275	0.801673	-0.069099	0.525165
8	4.49347	4.35174	2.38215	1.5443	1.53933	1.71159	1.69367	2.57639	2.48333	0.932533	2.66401	2.41826	2.07932	1.90957	2.76467	3.60483	2.07958	1.99019	1.64811	2.46449	2.67294	2.7957	4.58539	3.25423	3.63103	5.14705	7.53106	3.87901	3.14779	2.44326	2.69401	3.97913	3.56751	8	0.543015	0.608779	1.38443	0.206736	0.709126	1.18353	0.984296	0.793682	1.04747	0.266245	0.709269	0.914354	0.734071	0.254372	-0.0493067
9	4.34785	4.31371	2.4085	1.19171	1.16423	1.43659	1.47623	2.56098	2.76613	1.17339	2.18611	2.12554	1.89128	1.92302	2.26155	3.52971	2.36467	1.96055	1.38769	3.14332	2.34252	2.27846	4.46509	3.63101	3.72004	5.2942	7.23245	4.01673	2.96941	2.88686	2.46758	4.45937	3.7844	9	1.23373	0.438725	1.65237	0.368845	0.459456	1.31367	1.05146	1.00705	0.736973	0.396766	0.523398	0.65695	0.488775	0.0270749	0.211311
10	4.50832	4.13578	2.39479	1.28674	1.30289	1.45719	2.02022	2.08359	2.79897	0.511014	2.24663	2.25898	1.81626	1.7061	2.48237	3.33409	2.12797	1.70374	1.02068	3.07636	2.14032	2.82396	4.54771	3.3367	3.80601	5.28987	7.8209	3.29197	2.97425	2.63723	2.62113	4.18373	3.59985	10	0.615729	0.575261	1.27987	0.471147	-0.0902999	1.51626	1.12562	1.48358	1.41505	0.476701	0.142651	0.694687	0.742019	0.0964141	0.199032
11	4.47474	4.19753	2.51583	1.83978	1.33168	1.42003	1.36183	2.62261	2.57876	0.913456	2.30538	2.15573	1.59438	1.9236	2.49321	3.14684	2.2333	2.00568	1.75655	2.93079	2.79492	2.79906	4.39751	4.02473	3.59219	5.29954	7.66446	3.29898	3.22015	3.00231	2.42974	3.77043	3.58007	11	1.08927	0.961802	1.31432	0.398165	0.488883	1.19566	1.58306	0.837686	1.16827	0.382355	-0.133357	-0.357191	0.753808	-0.0120491	-0.159263
12	4.93935	4.02201	2.33405	1.34553	1.12557	1.75501	1.20599	2.65251	2.97961	0.808777	2.4289	2.25992	1.90363	2.00217	2.33335	3.68497	2.01376	1.96008	1.16245	2.89432	2.3528	3.0656	4.38099	3.19692	3.60161	4.96502	6.67715	3.37148	2.91991	2.71854	2.26813	3.96074	3.80313	12	1.49686	0.797238	1.35984	0.648425	0.2908	1.08255	1.4254	1.3295	1.0171	0.611979	-0.601483	0.00138462	-0.287309	0.191921	-0.0372379
13	4.56855	4.26088	2.05717	1.44837	0.721922	1.79198	1.35647	2.65947	2.35568	0.966547	1.80506	2.0684	2.20534	1.94586	1.40596	3.68015	2.28586	1.75403	1.66809	3.18558	2.83957	2.89389	4.55253	3.3167	3.35761	5.14612	6.00534	3.31668	2.90685	2.578	2.40441	3.87216	3.32888	13	0.66059	0.868191	1.30645	0.242909	0.392264	1.11771	1.22296	1.2169	0.7534	0.465181	-0.0986611	0.414823	-0.0727821	-0.0896324	0.276227
14	3.85512	3.98183	2.25425	1.29866	0.873113	0.894206	1.20499	2.1869	2.68277	1.16824	2.21497	1.81235	1.96539	1.8797	2.4901	3.27766	2.27274	1.79448	1.36984	2.88004	3.00398	3.37728	4.44576	3.07152	3.4651	4.9291	5.77855	3.33173	3.50165	2.71142	2.59289	3.72558	3.79989	14	1.17037	0.91573	1.33829	0.556073	0.953248	1.27589	1.16253	1.61988	1.28456	0.267112	0.121167	0.557588	0.126245	0.328433	0.351915
15	4.28265	3.74701	2.21806	0.818724	0.588986	0.563495	1.11122	2.14189	2.80064	0.827807	2.14857	2.37861	1.653	1.49345	2.27572	3.88799	1.5385	2.00157	1.93222	2.97438	2.40023	3.04835	4.07685	3.44847	3.307	5.24189	6.596	3.32124	2.73085	2.50738	2.35362	3.88244	3.22015	15	1.17416	0.589184	0.873972	0.452226	0.717732	1.42924	1.17118	0.937571	0.718465	0.0717032	0.738727	0.632318	-0.0324869	0.173936	2.44404
16	4.02396	4.08243	2.09692	2.13368	0.856438	0.542007	1.47949	1.87083	2.66128	0.422343	2.14436	1.94136	1.59953	1.78289	2.38705	3.69485	1.83624	1.91428	1.67713	3.01437	2.62054	3.03364	4.01333	3.55642	3.37803	5.09874	6.91063	2.96992	2.57414	2.47499	2.2257	3.69649	3.6436	16	0.579033	0.714295	1.05635	0.423142	0.592918	0.755805	1.2916	0.0357404	1.11875	0.581363	0.413167	0.486904	-0.352565	0.00182339	1.17791
17	4.16189	3.98348	1.87892	2.15761	0.723978	1.01329	1.64001	2.2878	2.93907	1.11989	2.62034	2.01674	1.74832	1.52227	2.39219	3.29086	2.23459	1.73599	1.35931	3.24875	2.7942	2.9595	4.15001	3.38076	3.52183	4.68382	6.60635	3.53997	3.00043	2.60609	2.00932	3.7198	3.56595	17	1.00013	0.946974	0.889223	0.43008	0.763472	1.666	1.43004	0.930995	0.965784	0.603297	0.577904	0.679337	-0.889272	-0.190918	0.941608
18	3.98878	3.51318	2.31003	1.80201	1.12295	1.01073	1.33115	2.4052	2.58192	0.736288	2.19192	1.84996	1.57187	1.81696	2.20557	2.82943	1.58276	1.96108	1.19996	2.59662	2.80503	3.04299	4.55469	3.06777	3.18178	4.65922	7.03411	3.29452	3.15156	2.63044	2.31333	3.62519	3.63666	18	0.742519	0.647344	0.763109	0.210358	0.701546	1.33976	1.03712	0.670807	0.941846	0.386525	0.352548	0.823568	-0.440878	-0.683581	0.488915
19	3.8754	4.06497	2.01533	1.35079	1.29764	1.00072	1.43681	1.80797	2.82357	1.00854	2.50915	1.86808	1.74065	1.94129	2.15343	3.10496	2.15864	1.5062	1.52314	1.88151	2.29922	3.24245	4.45792	3.78447	3.55198	4.74831	6.41067	3.67844	2.91721	2.24687	2.21989	3.83256	3.20613	19	1.26375	0.635807	0.804611	0.259668	0.399794	1.27491	1.28318	1.15995	1.15183	0.432346	0.268413	0.694818	-0.0766999	-0.164244	0.793002
20	4.11858	4.29591	2.18822	2.86858	1.03155	0.901571	1.23089	2.349	2.58869	0.922774	2.41032	2.19438	1.72474	1.77317	2.27607	3.45013	2.08308	1.25575	1.39882	1.92256	2.61797	3.02611	4.56194	3.67131	3.68727	4.68956	7.82785	3.32516	2.65387	2.57056	2.24655	3.94335	3.40599	20	0.989886	0.854693	0.955557	0.27778	0.657659	1.30513	1.08431	0.882785	1.2207	0.0453112	0.810884	0.849655	-0.0283024	0.320528	0.508176
21	4.01807	4.11927	2.1977	2.37323	0.920519	1.03578	1.40767	2.24664	2.77293	0.827078	2.11499	1.89385	1.29543	1.91923	2.40011	3.30027	2.26752	1.44449	1.80071	1.68587	2.55945	2.85644	4.20401	3.5863	3.51274	4.93546	8.43105	3.18116	2.79724	2.51853	2.24811	3.9032	3.4623	21	1.07044	1.29491	1.00623	0.602958	0.685966	1.29832	1.07449	1.31139	1.18622	-0.215446	0.671467	0.943377	0.383962	0.342143	0.500775
22	4.24335	3.94466	2.04413	2.03229	-0.421645	1.04469	1.32906	2.36469	2.51241	1.11733	2.43175	1.76816	1.84465	1.86392	2.35355	2.75243	1.99523	1.82495	0.845622	2.37361	2.5634	3.15308	3.86604	4.01682	4.10447	5.15233	7.70458	3.15068	3.04139	2.70037	2.28585	3.83503	3.11063	22	1.10939	0.88174	0.93405	0.690989	0.509452	1.61059	1.49387	1.03466	0.984442	0.291695	0.558292	1.1977	0.508381	0.456656	1.00637
23	4.0372	3.58574	1.96633	2.68957	0.161301	1.19259	1.32076	2.28857	2.94386	0.934957	2.78335	1.9568	1.72838	2.39457	2.49392	3.29295	1.63204	1.40535	1.62361	2.4461	1.94162	3.07978	4.6303	3.44365	4.053	5.08135	6.76456	2.69391	3.38764	2.84183	2.10937	3.8104	3.28961	23	0.867568	0.189582	1.33303	0.120169	0.65547	0.999914	0.85745	0.944376	1.55186	-0.185491	0.844635	1.14279	0.148368	0.409772	0.0824854
24	4.13947	4.25045	2.35764	2.23731	0.371121	1.21978	1.13439	2.37586	1.93463	0.800127	2.27204	1.9799	1.73127	2.10544	2.39381	3.61447	1.78472	1.17091	1.91775	3.32388	2.9579	2.65261	3.80091	3.7397	3.87606	4.82443	7.66132	2.84518	2.89968	2.66572	2.05273	3.79082	3.46025	24	0.960768	0.839819	1.38459	0.242937	0.621922	1.68344	0.750175	0.813231	1.38855	0.468397	0.589379	1.27962	0.348699	0.285416	0.669324
25	3.89577	4.17859	2.13254	1.90218	0.479783	1.10162	1.28721	2.24098	2.79746	0.472492	2.1224	1.92213	1.5397	2.22304	2.07257	3.48739	1.84282	1.30909	1.60168	2.80675	2.87844	3.3399	3.45234	3.3231	3.68353	5.15065	7.24233	2.98219	3.64743	2.51846	1.97195	3.75235	3.31653	25	0.544963	0.756313	1.44475	0.375906	0.375308	1.02923	1.14082	0.919568	1.22309	0.416479	0.974524	1.07559	0.720899	0.233403	0.325085
26	3.71636	3.69606	2.23402	2.10852	0.832652	1.42886	1.18399	1.95626	2.44692	1.00556	2.47793	1.74052	1.87667	1.78069	2.04594	3.21789	1.63467	1.52066	1.34697	2.50332	1.88574	3.66177	4.31592	3.14797	3.23506	5.13864	6.55179	2.55027	3.07684	2.72113	2.23238	3.40443	3.28658	26	0.822445	0.408537	1.61554	0.598729	0.354252	1.31862	1.37495	0.128802	1.16826	0.0437164	0.814997	0.752526	-0.128633	1.25251	0.265431
27	3.6837	4.05407	2.11402	1.56383	0.492313	1.28677	1.45393	2.10051	2.43843	0.766628	2.25463	1.54116	1.93399	2.00101	2.20544	3.8133	2.06982	0.913453	1.56193	2.45115	2.80211	2.80674	3.817	3.14821	3.39044	5.11131	7.13616	3.61741	3.10477	2.60588	2.1112	3.55939	3.25923	27	1.07743	0.771707	1.37062	0.294396	-0.0095571	0.703674	0.955012	0.891159	1.07378	0.275059	0.409611	0.96033	-0.295255	1.10106	0.0293034
28	3.5301	3.64669	2.4256	2.23259	0.71779	0.917101	1.21926	2.15203	2.16734	0.777379	1.81078	2.03291	1.35282	1.92776	2.24025	3.12077	1.40744	0.720984	2.0065	2.66989	2.69379	2.57527	3.91769	3.05403	3.35021	4.73953	6.94981	3.72787	2.68414	2.52648	2.05696	3.54397	3.32617	28	1.07085	0.766747	1.26051	0.913985	0.647905	1.12966	1.22284	0.450587	1.41111	0.501422	0.738437	0.872302	1.04531	-0.767896	-0.103309
29	3.77422	3.79973	2.29025	1.57858	0.719423	1.48224	0.779448	2.0529	2.75156	0.929083	1.91884	1.6726	1.80248	1.82642	1.82203	3.2775	1.74042	0.882746	0.620667	2.54963	2.39765	2.93891	3.88911	3.68407	2.82818	5.03472	7.39318	3.17488	3.1844	2.02459	2.11837	3.52295	3.47696	29	0.480508	0.795662	1.2948	0.307122	0.659069	0.922157	1.09987	0.843867	0.985263	0.0847569	0.447359	1.02362	0.0980157	-0.126818	0.250047
30	3.94196	3.62816	2.05914	1.01901	0.757221	1.03818	1.16603	2.32543	1.96149	1.05922	2.05757	1.87416	2.03106	1.78834	1.97931	3.03205	1.73804	1.08238	1.32366	2.38626	2.46969	3.14285	3.81641	2.74795	2.97787	4.75856	7.11639	3.05624	3.06612	1.55059	1.96843	3.34446	3.04598	30	1.24592	0.672061	0.999067	0.437878	0.0646012	1.49847	1.20027	0.481999	1.4285	-0.119771	0.349876	1.16102	0.515237	-0.268767	0.0170109
31	4.19397	3.29443	2.03715	1.02939	1.24836	0.925046	0.862009	2.71063	2.54108	0.589533	1.80958	1.99723	1.81676	1.83715	1.87168	2.91442	2.03877	1.06794	0.784845	2.09985	2.43074	2.77409	4.15717	2.73822	2.75057	4.51058	7.0985	2.96353	2.4658	2.52619	1.80746	3.30591	3.06963	31	0.832622	0.96306	1.2595	0.368326	0.156673	1.27023	0.909492	0.425682	0.369887	0.261026	0.773501	1.07963	0.363831	-0.521478	0.477628
32	3.54225	3.31903	1.89257	1.23045	1.01998	0.829773	1.05647	2.49177	2.27664	0.745666	1.58667	2.04456	1.26945	1.88072	1.56448	2.8807	1.69024	0.924774	1.02287	2.45667	2.8443	2.02273	4.1465	3.07927	3.14325	4.54301	7.28864	3.32102	2.48813	2.79122	2.28963	3.31078	3.00725	32	0.772789	0.649515	1.04798	-0.211146	-0.0322656	1.44232	1.16999	0.943967	0.854995	0.206714	0.707072	1.40633	0.629227	-0.924763	-0.00100926
33	3.42328	3.33825	1.50659	1.40861	1.03512	0.987927	0.871309	2.81577	2.77961	0.695017	1.91601	1.67756	1.61542	1.77101	1.94998	2.60866	1.52491	0.958931	1.53074	2.59916	2.27947	2.37694	3.929	2.24878	2.92537	4.52609	6.58432	2.90529	2.65928	2.63714	1.71727	2.97055	2.76644	33	0.870639	0.860808	0.726002	0.193665	0.11382	1.71651	0.774655	0.683565	0.690969	0.0658684	0.364645	1.25121	0.408518	-0.774099	0.00766962
34	3.33097	3.29847	1.71991	0.63921	1.07894	1.43226	0.901051	2.35898	2.33834	0.899834	1.94476	1.92488	1.46969	1.7094	1.97966	2.95419	1.39328	0.866327	1.34459	2.05896	2.32146	2.86892	3.844	2.66523	2.89126	4.49767	6.55789	2.73137	2.39812	2.57334	1.83119	3.27984	3.08734	34	0.225182	0.981784	1.37152	0.328404	0.639798	1.38899	1.04085	0.342278	0.771652	0.221646	0.304924	0.952762	0.531458	-0.817486	0.139441
35	3.69959	3.54753	2.06338	0.497203	0.674369	1.28609	1.18869	2.19432	2.27626	0.961328	1.98682	1.94445	1.76037	1.64263	1.82992	2.93121	1.7116	1.00138	1.03902	2.40806	2.13098	2.80954	3.43516	2.43437	2.60855	4.45958	6.36631	2.6514	2.40136	1.95725	1.77451	2.99892	2.83817	35	1.18301	0.650413	0.975661	-0.13776	-0.0827162	1.37894	0.946431	0.0899173	1.00251	-0.427192	0.658983	1.12691	0.363814	-0.132299	0.364054
36	3.49729	3.61115	1.58019	0.613195	0.512277	1.34053	1.03755	2.3199	2.67036	0.739894	2.05392	1.5384	1.37876	1.4556	1.41539	2.84242	1.38448	1.6322	1.50062	2.4326	2.19501	2.28866	3.60168	1.68853	3.31999	3.95762	5.96033	2.5972	2.53669	2.23866	1.85104	3.26812	2.663	36	1.43859	0.886944	1.2662	0.432289	0.395562	0.862859	1.27524	1.01879	0.927521	-0.238267	0.604466	1.37831	0.492732	-0.223635	-0.692803
37	3.33489	3.36562	1.63572	0.640138	0.503284	0.985931	0.816292	2.26072	2.00376	0.666979	1.2936	1.59381	1.58641	1.40158	1.81408	2.80523	1.57421	0.952119	1.52917	2.24079	2.31156	2.28639	3.94375	2.3716	2.49659	4.26571	6.57335	2.52103	2.16289	2.13253	1.51989	3.04551	2.96229	37	1.27305	0.29525	1.3479	0.223497	0.168944	0.903223	0.895723	0.5169	0.795926	-0.0866497	0.662264	1.37623	-0.0790835	-0.511346	-0.851524
38	3.40317	3.21264	1.93289	1.50115	0.639722	1.03073	1.07022	2.20419	2.1253	0.631165	2.13952	1.73327	1.44583	1.72992	1.66061	2.97494	1.59381	1.17127	1.54755	2.37285	2.07636	2.01503	3.65987	2.96998	2.81045	4.30714	5.79285	2.5202	2.12569	2.05264	1.7639	2.92757	2.69983	38	0.94129	0.814714	1.68288	0.512057	0.0550048	0.964485	0.844312	0.694205	0.449249	-0.488876	0.513597	0.850801	-0.630573	-0.693505	0.102695
39	2.98477	3.40819	1.89425	0.906036	0.688842	1.14195	0.997837	2.15732	1.98452	0.485425	1.70128	1.77467	1.58672	1.4859	1.75379	2.74815	1.71162	1.01748	1.33897	1.81382	2.13173	2.21912	3.57753	2.67671	2.7281	3.51999	6.23889	2.46981	2.16459	1.99613	1.89157	2.85592	2.77002	39	0.431442	0.394021	1.38913	-0.27082	0.507894	1.24722	0.884678	0.462811	-0.0614164	0.0715689	0.38523	0.70155	0.121015	-0.200245	-0.00505422
40	2.63349	3.19406	1.66364	1.20397	0.666073	1.06757	1.4555	1.62932	1.85725	1.0978	1.84109	1.70686	1.54133	1.3831	1.61441	2.6631	1.38426	0.675851	1.52907	2.68823	1.9329	2.16278	3.23767	1.80092	2.71122	3.90007	6.2344	2.57153	1.9083	1.99066	1.83419	2.61659	2.53271	40	0.243822	0.896223	1.2719	-0.0750131	0.658361	0.940644	1.20625	0.450472	0.400031	0.240636	0.623945	1.13601	0.417759	-0.163825	-0.203175
41	2.56008	2.65715	1.72521	1.18406	0.341526	1.32528	0.845295	2.04084	1.81075	0.771644	1.86112	1.78617	1.59257	1.65403	1.63132	2.64909	1.47806	1.39935	1.36569	1.81715	2.14357	2.52207	2.76928	1.80546	2.74354	3.94233	6.85423	2.39117	2.01592	1.56148	1.78975	2.83983	2.81778	41	1.12785	0.746639	1.08975	-0.0689822	0.729357	0.665026	0.837473	0.680649	0.544826	-0.0909582	0.539767	0.811064	-0.0183407	-0.578756	0.00904824
42	2.7213	2.46106	1.57471	0.768884	-0.127898	1.19477	0.942161	1.9505	1.92091	1.13547	2.05218	1.42282	1.60347	1.47679	1.74038	2.65668	1.31932	1.16145	0.987204	2.22294	1.96252	1.90772	3.63548	2.16563	3.09739	4.04132	6.50122	2.47257	1.94844	1.65577	2.37297	2.65735	2.54328	42	1.31469	0.550595	1.35091	0.15997	0.0309288	0.729841	0.656624	1.05115	0.322076	0.30551	0.255429	1.00199	0.145578	-0.141923	-0.0836312
43	2.63599	2.76166	1.6068	0.826975	0.347888	1.19527	1.08564	1.66298	1.6091	0.360894	1.92287	1.70587	1.50805	1.37562	1.50596	2.8928	1.89737	0.965643	0.454325	1.78654	1.89153	2.2049	4.25441	2.2633	2.59787	3.62802	6.29415	2.61161	2.61469	1.362	2.19612	2.38509	2.72493	43	0.819703	0.921652	1.3381	1.20721	0.34074	0.749995	0.65374	0.672457	0.349384	0.486158	0.227837	0.815034	0.357952	-0.644926	-0.244176
44	2.53311	2.57541	1.93365	1.51333	0.393524	1.30376	1.10088	1.75383	2.06739	0.785738	1.25187	1.3456	1.44196	1.17281	2.18545	2.42915	1.89584	1.21004	1.17519	2.05631	1.8156	1.97954	3.72987	1.99149	2.43945	4.01637	6.05394	1.8556	2.50063	2.32659	2.17318	2.33241	2.83477	44	0.515704	0.546114	1.15017	0.877325	0.118302	0.819687	0.901152	0.451924	0.512555	0.316821	0.660083	0.262575	0.561153	-0.564909	0.0796253
45	3.14867	2.56393	1.86234	1.03777	0.638085	1.04183	0.945042	1.99012	1.88382	0.509498	1.75982	1.19391	1.50949	1.48002	1.57453	2.24513	1.78346	0.784017	1.37904	2.66478	2.04952	1.96619	3.22263	2.70502	2.2511	3.74284	5.73901	1.73416	2.2405	1.74413	1.93429	2.17957	2.56569	45	0.760811	0.734553	1.45483	0.0487794	0.460894	1.08193	1.09435	0.408174	0.816047	-0.0155832	0.297494	0.0196788	0.247966	-0.380877	0.185467
46	2.58769	2.6648	1.62262	1.08025	0.30032	1.25048	1.12233	1.73076	1.53664	0.803983	1.68141	1.49753	1.60806	1.45591	1.38321	2.38645	1.41952	0.601258	1.01571	2.1216	2.04484	2.00568	3.12097	1.58786	2.43324	3.69275	5.52553	2.00994	2.31741	2.09798	1.68361	2.97615	2.42306	46	0.211565	1.08538	1.38636	0.299238	0.580063	0.846433	0.888895	0.586462	0.557817	-0.282972	0.14568	0.242141	0.383754	-0.552067	-0.396539
47	2.41364	2.46711	2.13353	1.17048	1.11259	0.957898	1.22027	1.96396	2.1754	0.222844	1.63835	1.54336	1.12857	1.28398	1.54213	2.47588	1.46757	0.919099	1.61203	2.24377	2.33715	2.31489	3.06931	1.71635	2.32574	3.5683	5.94415	1.9414	2.39514	1.71865	1.62386	2.66138	2.29799	47	0.989405	0.908241	1.00725	0.452164	0.483806	0.353325	0.775598	0.334434	0.687686	-0.0605082	0.125789	0.761513	0.239348	-0.182814	0.0842593
48	2.97286	2.37618	1.94995	1.02017	1.10742	0.928154	0.885825	2.10972	2.09196	0.670026	1.8145	1.54488	1.65647	1.32762	1.53816	2.09441	1.40827	1.09595	1.37843	1.80283	1.66537	1.92273	2.53343	2.30135	2.49819	3.9629	5.86542	2.07565	1.75381	1.81582	1.44836	2.59645	2.4523	48	1.12252	0.85927	1.17378	0.677399	0.539546	0.786523	0.9495	0.215738	0.287262	-0.0829263	0.927988	0.359524	0.142051	-0.55115	0.26696
49	3.02313	2.98875	1.67996	0.756903	0.63986	1.00366	0.810684	1.68113	1.46687	0.84163	1.7367	1.37515	1.41463	1.38435	1.44334	1.61471	1.77199	0.812468	1.52179	1.67253	1.9174	1.75196	2.63376	2.11356	2.45898	3.59831	5.3311	1.85534	2.41921	1.83843	1.59218	3.50431	2.27218	49	0.787307	0.982779	1.25837	0.470643	0.464814	1.15221	0.967079	0.417949	0.666011	-0.166549	0.278392	0.500133	0.330709	0.385851	-0.131178
50	2.55518	2.66137	1.64693	1.20626	0.570846	1.1889	1.25268	1.50718	1.92418	0.718053	1.16443	1.54786	1.00827	1.44681	1.07524	2.06534	1.64975	1.10415	0.945212	1.42638	1.90185	1.34636	2.50558	1.8043	2.10271	3.48372	5.01383	1.53927	1.67228	1.90126	1.3452	3.3687	2.17512	50	0.643217	0.92522	1.40102	0.244393	0.556571	1.31638	0.542455	0.352451	0.373419	-0.0892794	0.388096	0.761398	-0.0729126	-0.0293909	0.0555968
51	2.41347	2.7373	1.43915	1.09437	0.406917	0.991964	0.846234	1.32151	1.89114	0.507481	1.51146	1.56367	1.6142	1.28156	1.22339	2.03575	1.36783	1.0272	1.43974	2.57437	1.896	1.8219	2.74403	2.06316	2.52417	3.684	4.91802	1.46132	1.85638	1.69866	1.3242	2.91062	2.29338	51	0.944364	0.514887	1.12923	0.139838	0.754783	1.28132	1.23457	0.149628	0.0533057	-0.378183	0.06724	0.640625	0.35596	0.213079	-0.113081
52	2.83871	2.78896	1.67615	0.869422	0.451478	1.08497	1.24114	1.46037	0.995968	0.45427	1.36614	1.5684	1.4517	1.61682	1.69686	2.36976	1.562	0.624317	1.11713	1.33736	0.802105	1.49591	2.67715	2.11504	2.25389	3.46415	5.00595	1.72038	1.54574	1.50685	1.31835	2.78734	2.26813	52	-0.396564	0.976158	1.50389	0.524093	0.937222	0.911178	0.47708	0.848656	0.25	-0.214964	-0.00394635	0.681272	0.0703819	-0.253082	0.192123
53	2.86436	2.25979	1.35806	0.963736	0.76012	1.09009	1.40431	1.68854	1.70642	0.823149	1.63789	1.1471	1.33166	1.40973	1.32484	2.31938	1.44974	0.906492	0.608684	1.58128	1.92998	0.909238	2.96951	1.36415	2.28435	3.48416	5.12385	2.08736	1.98321	1.48016	1.34455	2.80433	2.16432	53	0.42092	0.849604	1.00299	0.337671	0.884823	0.836031	0.699891	0.452459	0.262509	0.00107204	0.412364	1.00111	0.0237365	-0.292941	0.44124
54	2.88029	2.77941	1.46179	0.687985	1.01744	1.11342	0.983457	1.46571	1.64371	0.537523	1.68781	1.48125	1.40536	0.962467	1.35455	2.10033	1.64113	1.31207	1.14844	1.3924	1.4071	1.24322	2.56511	1.33887	2.21567	3.31984	4.75403	1.80288	1.60997	1.56221	1.23357	2.65845	1.91438	54	0.631576	0.789789	0.764528	0.00446354	0.523755	0.887917	1.10865	0.492706	0.0548042	-0.418859	-1.00261	0.742563	0.0758948	-0.191185	-0.171837
55	2.54974	2.99351	1.53483	1.15249	0.596643	1.46219	1.18015	1.54241	1.88475	0.557878	1.18843	1.27271	1.57438	1.77385	1.68042	1.87893	1.88577	1.18345	1.06392	1.24647	1.42583	1.69515	2.92552	1.51206	2.23955	3.32058	4.90134	2.09396	1.31959	1.89874	1.41032	2.57335	1.95263	55	0.831672	0.875103	1.06816	0.0870067	0.474501	0.651657	0.950027	0.700529	-0.206272	0.155235	0.475993	0.190858	-0.0575109	0.0626115	-0.162952
56	2.83628	2.67666	1.20585	1.11047	0.729694	1.32316	1.11318	1.74491	1.50866	0.380903	1.44619	1.56201	1.18992	1.71129	1.1722	2.22886	1.61332	1.078	1.1681	1.52499	1.60479	1.52262	2.42371	1.61327	2.31094	3.35286	4.98249	2.41255	1.5878	1.7199	1.27815	2.34531	2.02267	56	1.05925	0.810131	1.07317	0.223759	0.729131	1.03374	0.806101	0.461133	-0.0901556	-0.0269153	-1.02204	-0.0155413	0.00369084	-0.249749	0.077596
57	3.67544	2.40527	1.52069	1.08885	0.510942	1.21956	0.310675	1.3525	1.12081	0.795657	1.55553	1.73258	1.20606	1.12636	1.46765	1.99742	1.81814	0.990645	0.779067	1.40284	1.67939	1.45227	2.8493	1.31034	2.18984	3.27579	4.84841	1.87029	1.88626	1.33498	1.20814	2.52147	2.09259	57	0.209202	0.591653	1.01153	0.23541	0.633301	0.886341	1.12278	0.302711	-0.310224	-0.251416	-0.169504	0.207891	0.359064	-0.380326	-0.247462
58	3.37824	2.38679	1.25477	0.394873	0.251985	1.22908	0.653964	1.27601	1.3869	0.470133	1.40759	1.43355	1.22935	1.20054	1.29737	1.88739	1.35839	0.734428	1.04249	2.10952	1.06756	1.26257	2.35965	1.74854	2.77956	3.0848	4.47537	2.00764	1.32328	1.59683	1.14609	2.4647	2.10338	58	0.979701	1.04638	0.988008	0.0366854	0.430769	0.765794	0.836304	0.44912	0.0824212	0.0818565	0.0784972	0.203419	0.360549	0.0200036	0.113976
59	2.9147	2.35495	1.33021	0.845661	0.67062	0.815757	0.970646	1.55603	1.70395	0.749134	1.23966	1.55286	0.852047	1.12114	1.0321	2.02518	1.29005	0.99758	0.076785	1.90473	1.14705	1.7453	2.492	1.32419	2.66932	3.56923	4.36045	1.94436	1.02116	1.32602	1.15278	2.37164	2.02554	59	0.612896	0.942366	1.09604	1.02065	0.201634	0.995542	0.635666	0.666632	-0.100207	0.249178	0.657067	0.2938	0.29136	0.100089	-0.0574808
60	2.53807	2.12478	0.656812	0.606661	0.498159	0.532005	0.765016	1.74689	1.23834	0.72365	1.00023	1.40569	1.31908	1.40434	1.43432	1.60113	1.43395	0.978227	0.88966	1.33533	1.6148	1.79096	3.29674	1.37857	2.69786	3.35087	4.92912	1.49285	1.62056	1.49157	1.23855	2.60762	2.1077	60	0.985569	0.75556	1.13647	0.407921	0.650614	0.642447	0.83196	0.564501	0.169273	0.294889	0.353736	0.536138	-0.106696	-0.0527026	-0.0971962
61	2.1969	2.56989	1.12929	0.860553	0.768795	0.832482	0.835469	1.85044	1.19212	0.782714	1.12432	1.21026	1.35061	1.26738	1.21723	2.07721	1.29635	1.76807	1.04898	1.80145	1.69516	1.69818	2.7258	1.30986	2.51656	2.91389	4.99823	1.95267	1.53025	0.975573	1.09994	2.62775	1.84955	61	0.703901	0.811273	1.24675	0.658026	0.0361047	0.748743	0.8233	0.344808	0.0956604	0.93891	0.0794238	0.453348	-0.813228	0.213193	-0.161074
62	2.58898	2.39181	0.842303	0.865708	0.941846	1.28751	1.05716	1.53382	1.75566	0.58118	1.19872	1.39259	0.952604	1.44808	1.11586	1.4577	1.26327	1.46644	0.582166	1.81646	1.33606	1.19363	2.31674	1.10056	2.2133	3.35017	5.01002	1.78937	1.756	1.08736	1.3013	2.38983	1.73685	62	0.857402	0.452646	0.894418	0.434387	-0.0126096	0.860705	0.333494	0.350212	0.0227224	0.304835	0.260863	0.334623	-0.391072	0.0909947	-0.998765
63	2.41326	2.08154	0.761196	0.464981	0.737042	1.16511	0.771926	1.89946	1.76821	0.414342	1.21476	1.1632	1.28511	1.06306	1.60645	2.16228	1.16248	0.926476	1.18146	1.0752	1.96171	1.32516	2.50346	1.26327	1.76228	3.497	5.13294	1.95573	1.31555	0.930318	0.959598	2.24674	2.05732	63	0.935069	0.795862	0.902589	0.202407	0.1641	0.532867	0.376942	0.286089	-0.0224726	0.221761	0.28236	0.47327	-0.295479	-0.0458674	-1.04595
64	2.81256	2.75138	0.910833	0.51744	0.164814	1.47571	0.802195	1.0226	1.98935	0.332867	1.08296	0.892634	0.953426	1.48465	1.37365	1.85853	1.09308	1.26242	0.999932	2.0489	1.32615	1.40843	2.18363	1.40831	2.26796	3.11088	4.53576	1.69415	1.68835	1.19908	0.710639	2.00088	1.88443	64	0.951632	1.21948	1.19251	0.415384	0.484898	0.814198	0.587417	-0.0589485	0.322845	0.249213	0.0947611	0.849652	-0.124539	-0.164547	-0.166346
65	2.68488	2.26598	1.0651	0.717398	1.00789	0.579898	1.02747	1.34644	1.38675	0.560742	1.01994	1.02341	1.39361	1.35086	1.22819	1.75359	1.83746	1.15408	0.719317	0.606029	1.19719	1.09488	2.33901	1.03007	2.29475	3.30703	4.45468	0.998002	1.39977	1.37288	0.960891	2.17084	1.89922	65	0.887046	0.609311	1.07773	0.0766229	0.589036	0.953809	0.854923	0.428225	0.581058	-0.070508	0.409016	0.736811	-0.225662	-0.413011	-0.191202
66	2.6661	2.11985	1.21432	0.634316	0.627175	-0.442852	1.04792	1.61576	1.78366	0.764873	1.35818	1.31475	1.42537	1.19177	1.15801	1.26195	1.56886	1.2964	0.782901	1.68707	1.51545	1.72787	2.51513	0.834006	2.23627	2.84304	4.54703	1.40365	1.55361	1.36062	1.27905	2.1878	1.79745	66	0.91255	0.570056	1.0766	0.260349	-0.129839	0.598721	0.830456	0.568923	0.438901	-0.245259	0.426947	0.552207	-0.163874	-0.209814	1.19619
67	2.56639	2.30893	1.29844	0.968861	0.795777	0.656723	1.10772	1.50659	1.71136	0.48553	1.50989	1.10553	1.07661	1.32693	1.47194	1.2726	1.45398	1.15495	1.1338	1.6307	1.40621	1.40452	2.19474	1.01077	1.74497	3.07558	5.20732	1.45666	1.25735	1.08057	1.09753	2.38689	2.09938	67	0.895355	0.82485	1.0804	0.0852552	0.35673	0.877681	1.0423	0.248681	0.154005	-0.21197	0.0918339	0.566964	-0.125455	-0.13898	1.2896
68	2.68061	2.24939	1.13108	0.564746	0.590325	0.867747	1.73674	1.67071	1.76436	0.636756	1.60676	1.75161	1.10223	1.04195	1.45971	1.8286	1.38764	1.03029	1.63769	1.31524	1.46654	1.46593	3.11776	1.51923	1.82733	2.79603	4.95534	1.61952	0.916589	1.36003	0.872225	2.13634	1.88803	68	0.824012	0.960109	0.347545	0.496261	0.0529116	0.887101	0.709981	0.0820946	0.526329	-0.267347	-0.45247	0.332691	-0.0338618	0.113386	0.347977
69	2.47141	2.01997	1.13182	0.725102	0.435723	0.623901	1.54518	1.69306	1.04036	0.377462	0.919916	1.23175	0.824933	1.28791	1.37023	1.723	1.54571	1.56358	0.582651	1.88187	1.0552	1.49046	2.53063	0.976089	1.71987	3.1668	4.2993	2.92368	1.01377	0.931224	1.02347	2.18252	1.75962	69	0.823334	0.885123	0.682696	0.417195	0.270356	1.02384	0.72214	0.336383	0.137414	0.30865	-0.820019	0.507792	-0.142768	-0.434809	-0.292119
70	2.77278	1.9293	0.84169	0.664847	0.816616	0.395715	0.939329	1.74313	1.70256	0.24336	1.00342	1.1137	1.12986	0.85164	1.19918	1.60711	1.19421	1.30558	1.37746	1.31736	0.825879	1.41821	2.57447	1.23966	1.63956	3.22779	4.39939	2.62029	1.09627	1.17509	1.08665	2.04871	1.63582	70	0.970682	0.284749	0.730069	0.318481	0.250401	0.939908	0.482824	0.794497	0.416776	0.272012	0.523002	0.309778	0.272888	-0.141369	-0.354692
71	2.36707	2.05015	0.902699	0.841892	0.363619	0.655524	0.901544	1.42691	1.68093	0.747322	1.37532	1.54242	1.37926	0.92567	1.25284	1.80365	1.22338	1.0277	0.938603	0.947816	1.49316	1.03103	2.54846	1.49181	2.0337	3.14843	4.43047	2.03913	1.27436	0.884041	0.944733	2.13245	1.83496	71	0.788487	0.969963	0.752734	-0.372529	0.372558	1.04603	0.263517	0.70337	0.311442	0.34565	0.572226	0.252922	0.230351	-0.0196837	0.426122
72	2.626	1.96714	0.87647	0.486613	0.882867	0.508169	0.983424	1.26996	1.91995	0.819141	1.10516	0.989799	1.2314	0.925126	1.39323	1.63266	1.41342	1.11488	1.24895	1.14104	0.902414	0.712507	2.3016	1.30973	1.72374	3.2369	3.9157	1.60587	1.05795	1.09652	1.08476	1.90117	2.30827	72	0.682549	1.098	0.716529	0.159795	0.506735	0.410038	0.329532	0.883058	-0.108721	0.110953	0.156969	0.190159	0.27351	-0.0440063	-0.00839076
73	2.50646	1.98613	0.838803	-0.0557891	0.740343	0.888074	0.751872	1.46818	1.11568	0.438913	1.07735	1.37287	1.0364	0.81022	1.39029	2.361	1.13763	0.92796	1.10167	1.1838	1.24	1.18813	2.58094	1.11783	1.58418	2.92621	4.02706	1.97093	1.06223	1.21189	1.01887	1.89322	1.92086	73	0.394263	0.686284	0.694796	-0.0721853	0.479343	0.898181	0.715091	0.653494	0.387094	0.215831	-0.0373538	0.4533	0.64384	0.251696	-0.1567
74	2.37015	1.86327	0.722999	0.91474	0.735967	1.10196	0.905057	1.38164	1.19942	0.243373	0.903638	1.55085	1.0634	1.00276	1.38169	2.30448	1.47516	0.914005	0.960281	0.847401	1.60784	1.20882	2.33698	0.981967	1.82893	2.73865	4.4525	1.48567	1.22838	1.06607	1.21902	1.94472	1.79228	74	0.762723	0.550849	0.678999	-0.506907	0.715639	0.98185	1.11006	0.119288	0.075437	0.344758	0.208734	0.200855	0.883475	-0.0928114	0.426121
75	2.16713	1.77406	0.966719	0.553879	0.335488	0.839328	0.785746	1.71449	1.29394	0.300872	1.05961	1.57744	0.70339	1.14778	1.3383	1.62715	1.30669	1.11069	0.5029	0.273179	1.28687	1.32544	2.20983	1.16146	1.75002	2.94267	4.1824	1.421	1.02741	0.906694	0.999404	1.79367	1.95395	75	0.488776	0.636962	0.66591	-0.000250056	1.19172	0.671053	0.878798	0.240673	0.124851	0.00467794	-0.0953515	0.57937	0.825221	0.0569569	0.133017
76	1.94931	1.9048	0.66477	0.988852	0.260388	1.08101	0.786423	1.22115	1.40892	0.362153	1.30346	1.11475	1.26938	0.952891	1.59246	1.7068	1.42506	0.58719	0.995458	1.60738	1.16641	1.05291	1.72751	1.1492	1.55849	3.26461	3.83945	2.1906	1.22969	0.883334	0.647185	2.1468	1.75387	76	1.1015	0.970509	0.66965	0.152743	0.837006	0.887172	0.523073	0.00200582	0.129923	0.0414528	-0.157161	0.634225	0.49173	0.0564441	0.145002
77	2.02402	2.01828	1.05231	-0.88922	0.491214	0.831306	1.01461	1.37646	1.55013	0.64084	0.700423	1.4298	1.23094	1.12767	1.42503	1.87569	1.35067	1.01769	1.20853	1.49696	1.44974	1.33169	1.99021	1.44673	1.7106	2.86163	3.78325	1.80454	1.27223	0.53687	1.08155	1.95218	1.80428	77	0.524517	0.494704	0.349073	0.116004	0.56107	0.525873	0.675412	0.144546	-0.206887	0.387105	-0.0382924	0.715206	0.347824	-0.785078	0.119131
78	2.53553	2.02199	0.910912	-0.382725	0.38105	1.08538	1.02916	1.47916	1.91779	0.335262	1.25965	1.15328	0.778662	1.36027	1.01889	1.57971	1.51251	0.911003	0.672942	1.20947	0.844758	1.59126	2.54608	1.09608	1.36881	3.24798	3.76246	1.81753	1.49923	0.744719	0.889318	1.8948	1.53507	78	0.565165	0.349111	0.473389	-0.501458	0.660826	0.366272	0.479572	0.43677	0.289843	-0.0518738	-0.311467	0.664084	0.577938	-1.42272	0.167505
79	2.64053	1.40102	0.985867	-1.09631	0.435226	-0.30932	0.816309	1.4878	1.42403	0.394863	0.918198	1.46353	0.965287	1.53725	1.05863	1.88173	1.11542	0.978439	0.990635	1.30796	0.954827	1.79425	2.02535	0.92277	1.06562	2.87757	3.14253	1.94217	1.55168	0.988321	1.30911	1.86272	1.47887	79	1.07431	0.700405	0.832616	-0.348333	0.609753	1.08753	0.484621	0.483841	0.155433	-0.11834	0.105369	0.593043	0.59627	-1.30248	-0.112695
80	2.59224	1.58459	0.57393	-0.402937	0.555877	-0.180083	0.529429	1.53674	1.30254	-0.0262591	1.28608	1.16328	1.06627	1.22762	1.25146	1.83397	0.943328	0.657719	1.09406	1.49176	1.41005	1.58854	1.91849	0.77268	1.50884	2.95449	3.87951	1.61997	0.319012	1.07169	1.03474	1.80529	1.62346	80	0.644436	0.506761	0.674001	-0.0155868	0.210803	0.620238	0.547767	0.69981	0.321945	-0.213262	-0.457487	0.652446	-0.0540015	-1.32538	0.0546279
81	2.0627	1.52242	1.25082	-0.108179	0.208972	0.19794	0.497626	1.57409	0.945386	0.5436	1.08261	1.03968	1.09703	1.08867	0.903846	1.26398	1.45508	0.658443	1.21039	0.913079	1.62431	1.75519	2.24544	1.07194	1.28984	3.01567	3.56513	1.45967	1.04915	0.818526	0.688336	1.76848	1.6394	81	0.895178	0.651891	0.858409	0.0420866	0.448312	0.818833	0.846665	0.907054	0.330753	-0.0417911	0.340741	0.285897	-0.455992	-1.10004	-0.493708
82	2.22418	1.62263	0.798563	-0.0131717	0.453252	0.239371	1.27807	2.1849	0.768427	0.585241	0.859307	1.00927	0.816959	0.949078	0.357717	1.11395	0.987568	1.06573	0.810136	1.07223	1.0319	1.03402	2.04115	1.10091	1.41287	2.40216	3.46413	1.59449	1.14166	1.161	0.878851	1.52455	1.9915	82	0.762418	0.280754	-0.0710537	-0.239854	0.82463	1.06944	0.500141	0.170683	0.134346	0.135543	0.124741	0.592196	-0.0918579	-0.78128	0.0295312
83	2.09146	1.4457	0.780466	0.0121097	0.493331	0.823801	1.34917	2.07698	1.1871	0.393516	1.09346	1.16701	1.14473	1.02244	1.24929	1.68112	1.00806	0.975163	0.954791	1.86928	1.17865	1.20281	2.43593	0.653087	1.22028	2.78719	3.95597	1.49532	1.05409	0.555738	0.743605	1.74254	1.70472	83	0.696402	0.29088	0.374873	0.0718493	0.189449	1.14404	0.493495	0.334301	0.470589	-0.0976798	0.414805	0.759946	0.298102	-0.703809	-0.11383
84	2.21658	1.0945	0.970908	-0.140597	-0.0753343	0.736295	0.914351	1.71539	1.29055	0.488193	1.19674	1.22293	1.35169	0.872821	1.16295	1.52918	1.12027	0.747554	-0.504639	1.18757	0.925251	1.11531	2.30017	1.34912	1.6317	2.9545	3.73742	1.93116	0.872153	0.753424	0.92932	1.63157	1.72358	84	0.782958	0.361481	0.880084	0.211235	0.114537	0.502829	0.422981	0.364638	0.57252	-0.0985571	0.566763	0.305702	0.0828712	-0.21159	0.0448638
85	2.17736	1.41705	0.780529	0.139746	0.655578	0.53934	0.775914	1.67804	1.15941	0.242366	0.962953	1.17535	1.4011	0.85508	1.32888	1.91148	1.16753	0.722214	1.23751	1.70915	1.60377	1.7567	2.19609	0.920227	1.49729	2.41344	3.98395	2.36466	0.769359	1.06592	0.926245	1.75082	1.57551	85	0.54274	0.655832	1.13936	-0.131863	0.474453	0.336234	0.573553	0.38061	0.385532	0.167919	0.368278	0.120256	0.245355	-0.139998	-0.0721975
86	2.20882	1.18049	1.16634	0.466692	0.0985435	0.650659	0.839991	1.82188	1.07024	0.484727	1.03215	1.04309	0.573401	0.655315	1.09014	1.52842	0.335145	0.654537	1.03947	1.37898	0.406852	1.05008	2.23038	1.22294	1.37856	2.69069	3.95926	2.31972	0.872453	1.58809	0.548071	1.59965	1.72845	86	0.931116	0.329159	0.906183	0.0797198	0.29358	0.446647	0.569581	0.397716	0.414682	0.526166	-0.566666	0.348776	0.21947	-0.388343	-0.0132675
87	2.24597	1.45259	0.979524	0.206556	0.457393	1.58152	1.30179	1.77937	1.26893	0.521138	1.04838	1.36565	0.900894	0.741332	1.05277	1.12402	0.966037	0.46788	0.919331	1.59079	1.50649	1.59671	2.38447	0.932335	1.30612	2.77136	4.48546	1.93429	0.946037	1.30848	0.423951	1.39173	1.50416	87	0.47136	0.436412	0.361587	0.204834	0.693759	0.840183	0.756207	0.249908	0.42188	0.240037	-0.103525	0.491972	-0.0768692	-0.427951	0.129832
88	1.77539	1.42828	0.673699	-0.106934	0.594551	1.74033	1.20394	1.10233	1.27641	0.21154	0.833234	1.27918	1.09395	0.975511	1.16245	0.790579	0.996064	0.70584	1.00285	1.30792	0.849015	1.1124	2.50848	1.09761	1.2843	2.54325	4.10918	2.11174	1.0594	0.642044	0.985968	1.35879	1.43093	88	0.524722	0.636765	0.511333	-0.0492062	0.324221	0.698473	0.572418	0.616172	0.447844	0.336783	-0.321062	0.564051	0.108071	-0.174003	-0.105313
89	1.69395	1.19678	0.835954	-0.202634	0.436753	1.19996	0.9944	1.57914	1.15829	0.385573	0.953875	1.14429	1.22155	0.855121	1.3012	1.37222	1.09332	0.860886	0.728597	1.01612	1.32046	1.15872	1.72161	0.895307	1.28835	2.44267	3.33524	1.83792	1.06536	0.766199	0.873039	1.47033	1.23213	89	0.928539	0.615986	0.601555	0.190543	0.464959	0.928283	-0.252512	0.150629	0.118785	-0.222625	0.0779194	0.61649	-0.0917909	-0.708504	0.403329
90	1.93467	1.36628	0.513634	0.492405	0.736736	0.512677	0.927816	1.4363	1.42003	0.383195	0.945583	1.30409	1.15464	0.605451	0.951167	2.06429	0.572174	0.652124	0.858558	1.2132	1.12081	1.2179	2.02661	0.58457	1.4275	2.16539	4.14618	1.39269	1.23979	0.888364	0.855218	1.60337	0.894099	90	0.729375	0.618215	0.331225	0.251668	0.361602	0.643733	0.0547005	0.559823	0.43515	0.0087596	0.109915	0.641185	0.0970403	-0.172222	-0.0584843
91	2.20337	1.3022	0.798307	0.322467	0.509521	0.489785	1.0428	0.719129	0.994716	0.295602	1.02994	0.541291	0.819453	0.611637	0.769326	1.71123	0.799082	0.827149	0.740312	1.12728	1.20777	1.44175	2.46335	0.680738	1.65955	2.62568	3.60684	1.42929	1.08299	1.12811	0.795875	1.7644	1.45448	91	0.459627	0.804881	0.536282	0.288455	0.138511	0.759259	0.425988	0.408519	0.578818	0.103698	-0.288571	0.483872	-0.170495	-0.142549	0.108258
92	1.66275	1.41838	0.948596	0.402337	0.305241	0.732971	1.0559	1.37873	1.10319	0.315161	0.869281	1.56111	1.02815	0.963413	1.05374	1.66515	0.844575	0.641241	1.03914	1.35684	1.64325	1.48016	1.7455	0.77577	1.37617	2.25154	4.06377	1.83989	0.852163	1.41597	0.86564	1.47566	1.35225	92	0.813372	0.290967	0.746076	0.225253	0.484474	0.823889	0.656233	0.25821	0.539537	-0.0223797	-0.183502	0.314896	-0.69542	-0.262197	0.000354995
93	2.18887	1.48104	0.683851	0.690078	0.050938	0.653346	0.757204	1.30856	1.18946	0.14114	0.92298	1.1072	1.08889	0.642921	0.989823	1.59523	0.693093	1.19111	0.964601	1.37187	1.15595	0.965463	2.29392	1.25129	1.15672	2.72351	4.20688	1.52718	1.03135	0.849722	0.864677	1.56428	1.28323	93	0.285545	0.723834	0.349822	0.4731	0.520375	0.907502	0.374652	0.0670173	0.934278	-0.153584	-0.344405	0.625808	-0.227721	0.00600685	0.136575
94	2.0105	1.15099	0.909559	0.204428	0.467	0.772823	0.491862	1.51514	1.21257	0.215892	0.999634	1.14513	1.0896	0.802829	0.880422	1.09952	0.5752	0.656413	0.643348	0.897203	0.56255	1.76756	2.65642	0.237621	0.99581	2.27386	3.81573	1.20564	1.13486	0.830351	0.746454	1.49374	1.01682	94	0.759567	0.575878	0.815372	0.134472	0.423197	0.48535	0.787486	0.671357	0.465623	-0.116119	0.0969841	0.458277	0.170174	-0.361721	-0.160346
95	1.85706	1.16979	1.08391	0.546787	0.032228	0.846157	0.402273	1.52007	0.942859	0.270825	0.510045	1.23937	0.817337	0.940634	0.949441	1.43466	0.751261	0.912879	0.657528	0.896459	1.0429	1.77735	1.77047	0.80849	1.19442	2.10392	3.81775	1.52592	0.96116	1.04893	0.864324	1.62389	1.36403	95	0.94902	0.599466	0.29363	-0.0796299	0.418947	0.970153	0.116807	0.558222	-0.0624649	-0.0291816	0.0616304	0.63133	0.484896	-0.36467	0.217401
96	2.07761	1.49023	0.628298	0.124784	0.321619	0.476118	0.610807	1.3111	1.22855	0.382648	0.531448	0.974873	0.940872	1.01729	1.15038	1.52491	1.01076	0.895982	1.25015	1.61553	1.18121	1.9196	2.09634	1.33018	0.999558	2.20335	3.81639	1.27963	0.782354	0.726589	0.971895	1.26255	1.29403	96	1.06962	0.920493	1.29145	0.312525	0.580783	0.937473	0.441905	0.661492	0.339517	-0.487972	0.503424	0.774698	-0.645329	-0.226	0.175525
97	1.97302	1.35519	0.965596	0.288874	0.158048	0.692883	0.590753	1.4603	1.09202	0.0864624	0.662903	1.23955	1.02086	0.623106	1.15825	1.5904	0.583584	0.393729	0.287917	1.2015	0.917939	1.71007	1.88576	0.888813	1.38388	2.27556	3.69108	1.41416	1.17057	0.785993	1.19384	1.71463	1.24224	97	1.15947	0.681816	1.03411	0.132297	0.150109	0.659045	0.593797	0.5709	0.717077	-0.255704	0.130432	1.03961	-0.534454	0.0241632	-0.119034
98	1.58055	1.11445	0.925885	0.311782	0.513213	0.752345	0.415096	1.48903	1.03617	0.170179	0.990072	1.12141	0.783345	0.702864	1.03276	0.991273	0.9352	0.478935	0.53683	1.47782	1.38419	1.54136	1.8298	1.17575	0.862911	1.89875	3.61122	1.13292	1.02384	0.508246	1.01915	1.53902	1.18933	98	0.716556	0.65446	1.09294	-0.0922261	0.323515	0.491161	0.656458	0.29192	0.587078	-0.447888	0.0306739	0.610628	-0.0679721	-0.25313	-0.461571
99	1.56143	1.5098	0.736137	0.841942	0.83393	0.602641	0.703724	1.82664	1.10929	0.533239	0.944159	1.07159	0.904383	0.566113	1.03092	1.35652	0.98377	0.889717	0.654835	1.19935	0.939793	1.12585	2.03673	0.893473	1.32166	2.29101	3.88131	0.862761	0.922154	0.696213	0.690893	1.36481	1.25564	99	1.09526	0.679086	1.10766	-0.126509	0.398534	0.602998	0.443866	0.552056	0.197071	0.132728	0.240078	0.461033	0.207533	-0.839615	0.120554
100	2.12798	1.51107	1.3761	0.666383	0.353547	0.64032	1.23574	1.83581	1.20895	0.335738	1.31583	0.833929	0.784621	0.576917	0.766174	0.9796	0.489069	1.17293	0.409507	1.22737	0.983238	1.06633	1.95257	1.18241	0.86704	2.63844	3.29309	1.67242	0.695235	0.640909	0.911627	1.56202	1.29087	100	0.614191	0.647829	0.752552	0.503302	0.269428	1.12595	0.252915	0.0646155	0.304983	-0.641389	-0.474841	0.410514	-0.482391	-1.26116	0.372013
101	2.0511	1.4269	0.572764	0.458807	0.615838	0.708657	1.02145	1.1443	1.15714	0.510389	1.18497	0.948848	0.764067	0.6147	1.07471	1.49092	1.0645	0.692487	0.6859	1.16504	1.46374	1.50296	1.78126	1.47154	1.13686	1.99845	3.19675	1.43811	0.873806	0.788043	0.898132	1.74963	1.36899	101	0.359659	0.406976	0.466462	0.745596	0.820841	0.595376	0.659759	0.41996	-0.105555	-0.135476	1.48126	0.523681	0.0981549	-1.04884	0.591126
102	1.76582	1.28778	0.798936	-0.907124	0.974365	0.233103	0.676672	0.995265	1.05883	0.69624	0.934174	0.808497	0.66633	0.919277	1.3935	1.96645	0.626199	0.659602	0.946176	1.02689	1.14212	1.47641	1.97669	1.20115	0.670932	2.40462	3.95463	1.71235	0.616914	0.640887	1.11788	1.5442	1.73908	102	1.01481	0.592637	0.674161	0.247394	0.811311	0.796769	0.40101	0.369497	0.114023	-0.271791	0.588211	0.640814	-0.228489	-0.0876177	1.41707
103	1.27389	1.24754	0.603437	-0.374157	0.383786	0.583191	0.60495	1.26282	1.18294	0.43316	0.86446	0.806003	1.27356	0.840967	0.605823	0.950256	0.718049	0.650327	1.0114	1.18647	0.549415	0.901998	1.74969	0.604095	1.31361	2.41601	3.77886	1.00881	1.06795	0.17865	1.10963	1.78576	1.36838	103	0.300921	0.888515	1.00132	0.19915	0.488686	0.679944	0.44089	0.279862	0.000319985	-0.455039	0.679088	0.46826	-0.630479	0.96126	0.995232
104	1.86801	1.36145	0.404356	-0.422984	0.75348	0.518531	0.482403	0.978048	1.30166	0.249974	0.619937	0.819996	0.607125	0.548367	1.27914	1.22195	1.10715	0.721785	0.822778	0.820984	1.1411	1.48013	1.96376	0.692306	1.50391	2.44072	3.25635	1.18066	0.671634	0.682736	0.979805	1.58905	1.34665	104	0.230988	0.524051	0.643071	0.374114	0.25544	0.191257	0.90038	0.660543	0.110795	-0.301723	0.410888	0.719156	-0.00389025	0.660592	0.177764
105	1.4921	2.30988	0.655365	-0.113133	0.463678	0.807739	1.20007	1.40888	0.979534	0.238434	0.789466	1.18296	0.855979	1.05355	1.24156	0.996191	0.672404	0.368516	0.393626	1.52275	0.327572	1.39376	1.99426	0.839922	1.35783	2.11048	3.47159	1.13463	0.999951	0.717463	0.973557	1.39669	1.25349	105	0.745925	0.703305	0.808511	-0.101453	0.802809	0.762491	0.510432	0.563081	-0.0967715	-0.128768	0.605526	0.482232	-0.272491	-0.261094	0.267269
106	2.03204	2.05364	0.717491	0.200964	0.621663	0.381926	1.00071	0.926156	1.01564	0.241704	0.838396	1.26358	0.925679	0.880199	1.2704	1.48354	1.10936	1.04291	0.607754	1.07311	0.93103	0.971053	1.66579	0.343857	0.956346	2.3355	3.54186	1.29961	1.07552	0.411724	1.47272	1.51514	1.36606	106	0.441644	0.781223	0.695298	0.218371	0.53449	0.341843	0.692027	0.66092	0.140462	0.27312	0.195479	0.0433583	-0.131181	-0.888832	-0.422186
107	1.52533	1.79879	0.450281	0.43465	0.282521	0.507266	0.913835	1.06373	0.669995	0.602457	1.09846	1.50498	0.621957	0.623724	0.857609	1.12464	1.0335	0.502569	0.823534	1.16441	0.789736	1.42488	1.64982	0.964873	0.886958	2.23812	2.9805	0.691471	0.743166	0.584177	1.25719	1.53092	1.20776	107	0.456167	0.634486	0.773164	-1.09257	-0.00169556	0.749818	0.61777	0.205294	0.364214	0.0172742	0.270467	0.40715	-0.163131	-0.148246	0.125094
108	1.62148	1.85325	0.603309	0.229895	0.427418	0.583453	0.902852	1.15325	1.32992	0.382422	0.787754	0.781757	0.551562	0.884109	0.563358	1.36614	1.06302	0.638086	1.08414	1.10115	0.848533	1.51643	1.34673	0.933353	1.04792	2.10829	3.3883	1.60151	0.981967	0.462787	1.02408	1.45048	1.29829	108	0.270377	0.604639	0.812593	-0.271565	0.25536	0.914286	0.884764	0.248458	1.01316	-0.0730587	0.337673	0.296552	-0.292558	0.0910202	0.251047
109	1.38104	1.27821	0.69735	0.974126	0.294828	0.818322	0.615685	1.19237	1.27907	0.454334	0.330027	0.867808	0.978679	0.800634	1.28516	1.09476	1.25056	0.644389	0.95557	1.2331	0.895694	0.870868	1.69328	1.15193	0.951391	1.67989	3.36414	1.41212	1.08465	0.552895	0.840008	1.67115	1.2666	109	0.690462	0.218087	0.597706	-0.35603	0.230463	0.452033	0.223649	0.937341	1.0343	-0.145603	0.354806	0.105286	-0.0965747	0.231491	0.101092
110	1.60748	1.19333	0.744581	0.147174	0.327314	0.971065	0.709458	1.53748	1.1452	0.230121	0.552751	0.953894	1.04807	0.773368	0.733687	0.896582	1.31315	0.640026	0.699927	0.527658	0.546045	1.42864	1.47085	0.301352	0.848094	2.72471	3.21361	1.55478	1.25593	0.0832207	1.2466	1.4718	1.1804	110	0.792537	0.64344	1.07493	-0.25968	-0.649195	0.342304	0.601205	0.954466	0.837416	-0.0538263	0.29264	-1.09691	0.0773654	-0.574556	0.56103
111	1.32497	1.07284	1.17162	0.310035	0.177446	0.731723	0.611951	1.31345	0.981018	0.273736	0.666066	1.08879	0.817323	0.916413	0.811289	0.944516	1.28891	0.734224	1.22226	0.901733	1.26914	0.874912	1.37778	0.761998	0.76836	2.57298	3.38068	1.18914	0.761095	0.859079	1.10677	1.38669	1.18004	111	0.591121	0.494324	0.00834845	-0.0879467	-0.589095	0.825226	0.575372	0.201753	0.134995	0.00179816	-0.321389	0.0310668	-0.442386	-0.268066	0.443422
112	1.50896	1.20327	1.05131	0.409504	0.0840754	0.608599	0.836092	1.51337	1.31819	0.307746	0.277367	0.741031	0.749287	0.881901	1.15337	1.68104	1.30272	0.70636	0.128225	0.678413	0.74957	1.16568	1.56228	0.534222	0.38827	2.40561	3.37431	1.33465	0.998579	0.42657	0.986041	1.38259	1.00917	112	0.875222	0.338195	0.164774	-0.062998	-0.0431875	0.729728	0.501407	0.0843659	1.03662	0.00767793	-0.23754	-0.238151	-0.663943	-0.192113	0.392832
113	1.54688	0.77666	0.707334	0.487787	0.296106	0.626853	0.795623	1.7637	1.3289	0.19224	0.727553	0.30727	0.844099	0.721846	1.37682	1.60816	0.571861	0.524067	0.544158	0.892537	0.801241	1.09521	1.35499	0.597614	1.10824	2.3819	3.38497	1.30776	1.37539	0.252883	1.21816	1.48877	1.16258	113	0.389321	0.332895	0.536224	-0.759605	0.246358	0.962443	0.360265	0.710434	0.486898	-0.0233784	-0.0603584	-0.242601	-0.481068	0.275455	0.0297531
114	1.55559	1.18177	0.381749	0.279594	0.304639	0.93569	0.677217	1.60221	1.35787	-0.160602	1.28085	0.712114	0.905189	0.798748	1.19645	1.14042	0.976482	0.689794	0.446847	0.928617	0.601801	1.17493	0.922936	0.345383	0.890764	1.82414	2.77463	1.16975	1.03105	0.312646	0.866522	1.40917	1.06711	114	0.309503	0.421694	0.744119	-0.0724427	0.0711471	0.867553	0.670379	0.645665	0.398261	-0.151405	0.0394272	-0.257937	0.986624	-0.260655	0.159416
115	1.312	1.74319	0.778834	0.21547	-0.135666	0.666657	0.649177	1.3721	1.17119	0.370293	0.495816	1.12585	0.686456	0.692653	0.901066	0.926032	0.921036	0.774443	0.969813	0.84325	0.761215	1.33454	0.956939	-0.451962	1.16394	2.18252	2.79281	1.54412	1.17282	0.19434	0.771247	1.36832	1.11184	115	0.769765	0.546704	0.461413	-0.115111	0.257159	0.970543	0.437629	0.33004	0.203526	-0.454785	-0.00299094	0.389075	0.847566	-0.523847	0.379875
116	0.762715	1.10648	0.799879	0.234603	-0.012589	0.697964	0.613581	1.3749	0.467724	-0.100992	0.726304	1.11533	0.989709	0.725211	0.809863	1.26853	0.904811	0.674046	0.325295	1.20231	0.917288	1.4655	1.54638	0.445326	0.662575	1.84121	2.75937	1.99531	0.779648	0.140653	0.705768	1.43227	0.999643	116	0.912802	0.54183	0.604741	0.266799	0.506328	0.782426	0.153911	0.026565	0.234457	-0.192677	0.128253	0.0582252	0.439423	-0.447482	-0.132021
117	1.33651	0.935423	0.983391	0.140223	0.494479	0.692838	0.489391	1.13328	0.929109	0.415046	1.01589	0.972754	0.785116	0.416234	1.06194	1.5285	0.44023	0.719708	0.250708	0.810324	1.3173	1.13195	1.13578	0.28616	0.519283	2.00844	2.63355	2.48891	0.691226	0.388745	0.783468	1.20793	1.01783	117	0.377357	0.358211	0.43351	0.265815	1.03718	0.689484	0.451831	0.408203	0.232236	0.16789	0.0069079	0.336478	0.969535	-0.186897	-0.0744471
118	1.33116	1.21462	0.270768	-0.0977942	0.148189	0.735312	0.905774	1.00988	0.962381	0.368946	1.0875	0.91162	0.694495	0.583191	0.420605	1.71229	0.411809	0.677729	0.859084	0.753853	1.37142	1.51833	1.48076	0.194865	1.06618	1.98464	2.14667	1.83915	0.753192	0.39639	0.748184	1.42497	0.939674	118	0.576412	0.616586	0.642256	-0.0716179	0.402721	0.16778	0.795708	0.417931	0.0880255	-0.0774883	-0.0646505	0.33248	0.533523	0.128035	0.543799
119	0.974101	1.26286	0.769058	0.00955491	-0.0308471	0.403019	0.692897	1.18751	0.968517	0.107733	0.706542	0.920126	0.649031	0.828672	0.53323	1.47948	0.693062	1.0509	-0.150482	0.574084	0.548043	1.66646	1.71542	0.147149	0.937729	2.09361	2.68327	1.6479	1.13872	0.186605	0.579658	1.30629	1.27778	119	0.52656	0.443839	0.584267	-0.033504	0.692423	0.668306	0.68581	0.679759	0.0498358	-0.229016	-0.386081	0.220416	0.208444	0.127444	-0.387464
120	1.40508	0.871801	0.617588	0.556539	0.173644	0.641086	0.608395	1.13434	1.0387	0.377156	0.819457	0.775385	0.800144	0.900379	0.956226	1.57255	0.749323	0.734084	0.364044	1.00434	0.698516	1.36476	1.63698	0.643377	1.02131	2.01799	2.80126	1.5844	1.17466	0.494275	0.463994	1.24832	0.963876	120	0.524442	0.606731	0.149203	0.00266272	0.559026	0.935576	0.68676	0.465874	0.393995	0.211852	-0.0865658	0.248194	0.168386	0.760647	-0.294087
121	1.23027	1.12096	0.611457	0.679448	-0.165709	0.577591	0.791412	1.28982	0.76844	0.199303	0.661706	0.831754	0.901997	0.743043	0.219752	1.52275	0.691406	0.555425	0.202418	0.551245	0.790591	1.69137	1.6198	0.691126	0.780169	1.88508	2.54348	1.28173	1.2211	0.423305	0.690011	1.18446	0.828325	121	0.224513	0.425832	0.289476	0.275115	0.484653	0.541755	0.725856	0.407982	0.444084	-0.113184	-0.209441	0.965375	-0.225409	0.438975	-1.15228
122	1.32469	1.05691	0.487417	0.39932	0.306825	0.578976	0.789075	1.27654	0.762211	0.310022	0.532347	0.981426	1.0171	0.747618	1.06224	1.03554	1.2997	1.23617	0.489963	0.892197	0.954817	0.983032	1.46787	0.29847	0.674261	2.21578	2.98273	1.38328	1.23863	0.526291	0.660828	1.22063	0.797038	122	0.725454	0.471333	0.488465	-0.111395	-0.655658	0.506366	1.04445	0.393676	0.428552	-0.174148	-0.0728769	0.293553	1.2265	-0.782336	-0.815077
123	0.997231	0.980687	0.341003	0.14345	0.127162	0.398568	1.12781	1.25701	1.06042	0.189169	0.683261	1.20907	0.607405	0.564442	0.979671	1.06355	0.907692	0.943576	0.61897	1.51785	0.542025	1.09727	1.43483	0.490832	0.977265	1.91509	2.9485	1.77073	1.54224	0.333898	0.425189	1.08058	0.818258	123	0.265755	0.717235	0.650696	0.0214856	-0.0125527	0.31586	0.137944	0.362435	0.596402	-0.178824	-0.329308	1.00696	0.60875	0.00539371	-1.03295
124	1.2501	1.05165	0.464559	-0.0997968	0.102513	0.576308	0.71394	0.732054	1.21931	0.213801	0.682007	1.41838	0.773445	0.520161	1.09158	1.05862	0.833078	1.60796	0.634196	0.710299	0.564721	1.48216	1.26478	0.701859	0.220282	2.23471	3.42487	1.43977	1.08966	-0.317319	0.843055	1.11215	1.49029	124	0.268363	0.571306	0.779684	0.0468106	0.186872	0.584222	0.691107	0.866311	0.252014	0.281708	-0.0424225	0.28558	0.154934	-0.185857	-0.164257
125	1.41852	1.07164	0.451623	0.0732577	0.134299	0.623867	0.48444	1.28638	0.633701	0.502829	0.625795	1.0859	0.632145	0.621278	0.593188	1.37529	0.723615	0.837074	0.980657	0.899769	0.738034	1.66328	1.1254	0.176797	0.391528	2.14378	2.25559	1.81005	1.11756	-0.0134462	0.551235	0.858869	1.20524	125	0.55128	0.134857	0.771637	-0.376605	-0.43777	0.998656	0.275918	0.186915	0.307729	0.369137	-0.00565902	0.394263	0.162266	-0.571544	-0.254074
126	1.29162	0.589192	0.139015	0.231461	0.385414	0.570526	0.692242	0.970376	0.773601	0.529725	0.926352	1.30752	0.871273	0.753629	0.624232	1.19802	0.914776	0.768823	0.458335	1.15345	1.10857	1.19029	1.56094	0.397062	0.365229	1.95499	2.58022	1.69435	0.889242	0.413812	0.564454	1.22665	0.912955	126	0.887811	0.177634	0.393085	-0.224165	-0.203767	1.06146	0.379523	0.539323	0.260918	0.278971	-0.810227	0.534872	0.0777948	-0.740443	-0.163391
127	1.34995	0.928832	-0.137464	0.141518	0.131221	0.39982	0.425888	0.954886	0.445597	0.0787613	0.683327	1.15045	0.870329	0.695585	0.469146	1.53858	0.582599	0.339123	0.600575	1.14033	-0.25154	1.29392	1.39317	0.672505	0.532719	2.02056	2.61369	1.78647	1.03507	0.592485	0.489663	1.08296	0.624209	127	0.466838	0.413005	0.350113	-0.0103698	0.260222	0.295896	0.843629	0.495626	-0.00562428	0.128426	-0.11921	0.627041	0.056671	-0.228337	-0.00490765
128	1.68384	0.544355	-0.180525	0.0920242	-0.017641	-0.180865	0.596266	1.12787	0.616813	0.15527	0.584381	0.89557	0.531453	0.660328	0.348429	0.800492	0.644626	0.719047	0.726964	1.13086	0.465099	1.34026	1.48123	0.441168	0.71415	1.80555	2.27356	1.6579	1.06929	0.748763	0.394439	0.939678	0.319624	128	0.0258555	0.438376	0.541768	0.454336	0.36373	0.301655	0.745945	0.246481	0.190771	-0.112092	0.0839642	0.181679	0.422458	-0.448046	-0.370624
129	1.537	0.738969	0.570206	0.389669	-0.22902	-0.169963	0.337485	1.10523	1.42258	0.382118	0.754051	0.877082	0.796253	0.717268	0.839561	1.21201	0.547038	0.787759	0.778276	0.715389	0.975153	1.63498	1.70497	0.547498	0.677405	1.61416	2.38848	1.44123	1.01907	0.64856	0.375172	1.22766	0.95578	129	0.204625	0.875644	0.290079	-0.192576	0.203056	0.429176	0.389319	0.0486987	0.308988	-0.163477	-0.086465	0.450145	0.115727	-0.507821	-0.372703
130	1.11022	0.972812	0.383113	-0.0359937	-0.196705	-0.153613	0.326531	0.931775	1.05189	0.464679	-0.227929	1.12321	0.764245	0.838605	0.47367	0.920856	0.305106	0.807553	0.255546	0.576358	0.937462	1.71244	1.70235	0.220627	0.699196	1.74214	2.75889	1.49601	0.858302	0.289553	0.621253	1.10339	0.859434	130	0.712733	0.200987	0.339723	0.25443	0.0413493	0.417242	0.812475	-0.246246	0.062684	0.0299424	-0.918759	0.320317	0.157668	-0.0768657	-0.0495332
131	1.25804	1.21004	0.107245	0.0400361	0.105053	-0.163035	0.252878	1.06441	1.01272	0.246549	0.386955	1.21598	0.332133	0.587188	0.372984	0.741922	0.723289	0.700336	0.820709	0.75659	1.10394	0.996652	1.2421	0.681567	0.307796	2.14396	2.73788	1.48006	0.804092	0.322701	0.498026	1.02803	0.735469	131	0.803242	0.550939	0.821186	-0.321037	-0.218634	0.418975	0.791615	0.560219	0.0331517	-0.0138964	-0.569453	0.297565	-0.101237	-0.519661	0.39267
132	1.30844	1.27442	0.596307	0.198159	-0.273577	0.462302	0.428207	1.27609	0.710606	0.471756	0.685749	0.855475	0.860724	0.782994	1.12849	1.09585	0.212818	0.405247	0.895148	0.733721	0.791727	1.42925	1.85933	0.12638	0.570664	1.87766	2.37199	1.51693	1.18982	0.348242	0.48004	1.11642	0.634701	132	1.02191	0.354768	1.11646	0.130969	0.522658	0.908154	0.355989	0.116391	-0.0298472	-0.130029	0.055496	0.336833	0.00783408	-0.599451	-0.0384756
133	1.36561	1.33404	0.192922	0.14877	-0.271374	0.232336	0.533555	1.16214	0.958256	-0.0125615	0.671864	0.935404	0.666376	0.777087	0.620951	0.579193	0.641173	0.579299	0.746129	1.05328	0.849852	1.09271	1.54881	0.0172429	0.783071	2.15034	2.47452	1.45626	0.982755	0.873463	0.436854	1.44726	1.66829	133	0.783734	0.296219	0.58522	0.0314579	-0.187027	0.57366	0.598149	0.171692	-0.177619	-0.278552	-0.0301861	-0.0638627	0.08584	-0.561656	0.31821
134	1.59731	1.15447	0.15871	0.342695	-0.0731197	0.34155	0.491401	1.31307	0.926782	0.432476	0.488566	0.672384	0.626516	0.893532	0.375463	0.97929	0.486684	0.408366	0.563568	0.557104	0.72026	0.578223	1.12954	-0.04473	0.478411	2.09791	2.31195	1.33942	0.801955	1.43273	0.62054	1.35121	1.45694	134	0.528591	0.447659	0.802566	0.0483306	0.736032	0.504736	0.0948481	0.164432	-0.088819	0.434686	0.287657	0.477993	0.367323	-0.789341	-0.0148505
135	0.927157	1.07489	0.395688	-0.1742	0.0361931	0.145695	0.585207	1.37631	0.573474	0.432672	0.885281	0.61642	0.636934	0.460775	0.817844	1.06182	0.823582	0.425367	0.378654	0.480118	1.02323	1.10531	0.94332	0.0318004	0.88302	2.38259	2.11165	1.76855	1.10719	0.968009	0.709129	1.2431	1.33928	135	0.739279	0.644101	0.877901	-0.0112646	1.04425	0.680377	0.613109	0.084232	0.147282	0.137379	0.295971	0.490293	0.265721	-0.175117	0.13201
136	1.35671	0.670111	0.776489	0.245665	-0.665286	0.59045	0.525454	1.26851	0.705463	-0.0835964	0.931772	0.844705	0.829539	0.760916	0.689335	0.934468	0.720719	0.694155	0.840048	0.998735	0.863694	1.40093	1.00475	0.305409	0.715602	1.07926	2.17601	1.31515	0.877503	0.699741	0.501962	1.29862	1.2583	136	0.279123	0.584791	0.824933	0.278357	0.36393	0.638799	0.458738	0.313445	0.234064	0.0578056	-0.0247306	0.538744	-0.135291	0.0275412	0.534298
137	1.37232	1.08501	0.574059	0.414343	-0.746351	0.633774	0.598723	1.15083	0.456661	0.673447	1.02083	0.387705	0.548536	0.604689	0.888237	1.24708	0.732028	0.713023	0.829732	0.934839	0.581261	0.78296	1.27379	0.510991	0.405016	1.5855	2.58514	1.38481	1.03679	0.49065	0.56731	1.07389	1.29163	137	0.264481	0.262274	0.0375031	0.0965813	0.106665	0.685256	0.756891	0.0945071	-0.0760792	0.347646	-0.756501	0.0990732	0.044627	-0.0675248	0.40451
138	1.06493	0.805816	0.736735	-0.004855	0.00147205	0.533424	0.844796	1.26869	0.204171	0.144279	1.02771	0.874017	0.548798	0.341514	0.713786	1.049	0.937481	0.380902	0.949341	0.576737	0.666457	1.4826	1.1074	-0.275583	0.951869	1.53163	2.33839	1.39851	0.979383	0.559575	0.600949	1.36786	1.38561	138	0.57705	0.372592	-0.126744	0.190564	0.596043	1.19834	0.724479	0.255481	-0.481048	-0.13314	0.358884	0.940166	-0.204256	-0.298469	0.553653
139	0.670294	0.996423	0.512544	0.407135	0.110203	0.583119	0.173255	0.854584	0.279555	0.0581019	0.733522	0.500833	0.525057	0.813942	1.01073	1.1415	0.39427	0.896858	0.879323	0.798651	0.881464	1.33109	1.53273	0.0952491	0.800762	1.77683	2.38924	1.26038	0.622891	0.138151	0.607963	1.14097	1.08104	139	0.565355	0.544508	0.122777	-0.144436	-0.287232	1.3405	0.639422	-0.0494003	0.0102163	-0.177501	-0.167751	1.22426	-0.0546203	-0.351611	0.231611
140	1.25795	0.497141	0.283675	0.451655	0.132096	0.605984	0.372769	0.440677	0.604977	0.34071	0.624162	0.88597	0.6164	0.907934	0.863543	0.998697	0.63803	0.755325	-0.0771103	1.19871	1.31731	1.34984	1.37886	0.356216	0.545359	1.79574	2.0211	0.981222	0.86572	0.547004	0.740255	1.0108	0.791703	140	0.664754	0.354669	0.531815	0.123392	-0.248455	1.26144	0.405254	0.140986	0.155686	-0.0259563	-0.0690128	0.845597	0.13045	-0.21891	0.57797
141	1.1276	0.824535	0.416837	0.318578	0.0575981	0.692546	0.37764	0.979698	0.94735	0.504346	0.647337	1.09375	1.06761	0.158814	0.39658	0.448749	0.750398	0.892594	1.03449	0.62903	0.975837	1.0032	1.23956	0.34267	0.915999	1.72445	2.43424	0.629486	1.14847	0.288309	0.675238	1.17733	0.712399	141	0.414702	0.795784	1.0649	0.00699871	0.0851056	1.20091	0.209738	0.0724406	0.264303	-0.286913	0.220456	0.834529	-0.120889	-0.372753	-0.00936343
142	1.05269	0.829495	0.333982	0.385613	0.165339	0.524105	0.362172	1.04636	0.709869	0.0247947	0.633834	1.17105	1.06096	0.742868	0.465136	1.18932	0.754993	0.711216	-0.197245	0.958428	0.183094	1.13787	1.111	-0.250186	0.736689	1.99576	2.3604	1.11523	1.18635	0.167499	0.806526	1.22971	0.90075	142	0.366834	0.524452	0.782456	0.0173885	-0.0519538	1.29348	0.385246	0.390306	0.134572	0.162859	-0.734816	0.79162	0.0796808	-0.378532	-0.0874034
143	1.02905	0.927216	0.37662	-0.122132	0.354198	0.529941	-0.00956402	0.880914	0.114091	0.0732353	0.718761	0.795889	0.739208	0.765521	0.771218	0.400485	0.530985	0.564935	0.789189	0.946974	0.535105	1.15638	1.2571	0.237709	0.811533	1.60548	1.8909	0.876345	1.11641	0.630767	0.814287	1.02588	0.945185	143	0.552212	0.350576	0.121846	0.06141	0.129542	0.918408	0.286998	0.0115856	0.410769	-0.28041	-0.00628135	-0.913315	0.019579	-0.200141	0.0942828
144	1.38628	0.605902	0.724641	0.425836	0.370527	0.00889252	-0.0866532	1.34021	0.520273	0.153047	0.531268	0.798342	0.815008	0.94018	0.876058	0.860234	0.546959	0.377704	1.16277	0.749655	0.730224	0.891824	1.32033	0.7664	0.766752	1.92867	1.4619	1.08206	0.874304	0.441108	0.580849	0.935125	0.59429	144	0.520723	-0.0576917	0.322777	0.0192723	0.230016	1.10823	0.310928	0.250338	0.335988	-0.00571908	-0.7115	-0.506236	-0.318782	0.320234	1.29032
145	1.18873	0.463468	0.974133	0.00592608	0.151315	-0.230267	-0.440927	1.4545	0.134865	0.245747	0.419275	0.700885	0.566048	0.665262	0.328329	0.755546	0.111327	0.798605	-0.0218964	0.952125	0.81329	0.449713	1.5183	0.36703	0.675247	1.71672	2.02915	1.12584	0.681302	0.310448	0.497827	0.878556	0.72262	145	0.334539	0.612787	0.0635581	0.242383	0.208489	0.566393	0.206283	0.179983	0.15741	-0.035908	-0.0810392	-0.165726	-0.000168818	0.190484	1.12155
146	1.32397	0.675912	0.887149	-0.0886192	0.52177	0.407572	-0.109094	1.60034	0.560081	0.0138854	0.550203	0.60492	-0.00367882	0.515705	-0.184531	0.935667	0.158945	0.586085	0.379275	0.528857	0.748177	1.09324	1.47714	0.642919	0.424865	2.60127	2.14414	1.52679	0.842616	0.278033	0.457184	0.930473	0.548506	146	0.60568	0.218445	0.504792	0.240935	0.0684859	0.725894	0.369183	0.0927697	0.0731125	-0.292302	-0.157408	0.0402666	-0.0639445	-0.149201	0.591537
147	0.857423	0.728923	0.742737	0.226231	-0.895616	-0.167922	-0.030529	1.33488	0.639513	0.037788	0.59762	0.754331	0.701934	0.551028	0.909241	0.999433	0.221588	0.507384	-0.405594	0.574005	0.488952	1.48728	0.960912	0.280653	0.772103	2.34537	3.35948	1.20553	1.34616	0.603787	0.551255	0.930426	0.632161	147	0.303654	0.814561	0.344933	0.174304	0.320801	0.701053	0.826886	0.272086	0.0289778	0.00641221	-0.353438	0.123102	-0.0632207	0.015866	1.10959
148	1.03363	0.742476	0.956394	-0.619959	-0.184859	-0.11161	0.146597	1.36213	0.480302	0.0405845	0.717667	0.5083	0.676774	0.57561	0.736865	0.539769	0.577709	0.718732	0.908935	0.87267	0.465846	1.17939	1.35593	0.120169	0.678146	2.225	2.962	0.704641	0.284855	0.690868	0.675092	1.47748	0.571489	148	0.595399	-0.02318	0.00499424	0.291408	0.420467	0.798119	0.218967	0.403694	0.269098	0.145504	0.144632	-0.341166	-0.0968444	0.42153	0.764161
149	1.32013	0.797086	0.516817	-1.11744	-0.496697	-0.0534416	0.259695	1.25456	0.636835	0.146418	0.396602	0.903632	0.773462	0.418867	0.40898	0.577488	0.45202	0.51936	0.792881	1.03845	0.692779	1.17592	1.26266	0.812993	0.716852	1.60628	2.47831	0.743395	0.749192	0.494263	0.667722	0.877832	0.693919	149	0.430772	0.518851	0.223039	-0.349264	0.539074	0.647416	0.199583	0.40486	-0.17922	-0.349638	-0.0807021	0.33732	0.488723	-0.287747	1.04272
150	1.00828	0.448124	0.868188	-1.07915	0.29381	0.223177	0.399134	1.23057	0.841932	0.268886	0.311867	0.877277	0.994208	0.591369	0.644839	0.669922	0.503538	0.799037	1.10584	1.27929	0.0932076	1.15127	0.992681	0.688482	0.822049	1.80574	2.9181	0.636589	1.15057	0.52692	0.444795	0.948812	0.830953	150	0.321431	0.17307	0.374095	-0.0371622	0.314074	0.500199	0.688381	0.29836	-0.184679	-0.0279664	0.116918	0.0736213	-0.000788679	-0.19714	0.676732
151	0.927864	0.346934	0.806462	-0.247856	-0.158182	-0.0164653	0.451106	1.17236	1.11461	0.258271	0.595392	0.678946	-0.0641932	0.161209	0.757178	1.14566	0.00170616	0.556708	0.1617	1.02599	0.210229	1.42311	1.38615	0.586749	1.28471	1.45004	2.59867	1.02409	0.997967	0.224492	0.620375	0.796367	0.456463	151	0.437912	0.101164	0.593318	-0.00190267	0.614898	1.01638	0.512602	0.424368	0.39718	0.197377	-0.137945	0.484279	0.279759	-0.0223411	0.46204
152	1.28585	0.496049	0.986961	-0.0772459	-0.219519	0.346642	0.263997	1.04649	0.45516	-0.155421	0.75162	0.607914	0.774518	0.462155	0.985998	0.823267	-0.0375281	0.869792	0.699056	0.943186	0.394746	1.20651	1.12022	0.56728	1.35962	1.45653	2.10987	0.842139	1.02854	0.470225	0.82073	0.81542	0.306216	152	0.612493	0.304832	0.778862	0.171623	0.301688	0.485932	0.210798	-0.344696	-0.100447	0.186665	-0.365815	0.461936	0.451112	0.0457503	0.500106
153	0.916416	0.722938	0.42882	-0.191541	-0.156126	0.308554	0.467583	1.1695	0.755785	0.495039	0.624074	0.592255	-0.025238	0.547579	0.878801	0.722222	0.143957	0.320962	0.555045	1.02501	0.647363	0.978807	0.954856	0.225029	1.05648	1.49645	2.437	0.817428	0.958315	0.573386	0.824455	0.802122	0.372597	153	0.921386	0.377876	0.889295	0.238567	0.439527	0.626129	0.417181	0.38504	-0.349283	-0.350983	-0.319595	0.418122	0.327446	0.123614	0.241206
154	0.859619	1.24773	0.527623	-0.73822	-0.00648256	0.340772	0.196701	0.953425	1.11744	0.141554	0.21422	0.433676	0.489254	0.41856	0.864534	0.850248	0.565915	0.647066	0.86098	0.591696	0.0779578	1.15438	0.610415	0.530548	0.717553	1.58928	2.48496	0.997599	1.16918	0.580262	0.85979	0.904804	0.548059	154	0.0143737	0.274048	1.07135	0.100601	0.339855	0.755193	0.659944	0.189621	-0.0325938	-0.0758843	-0.461883	0.416927	0.131954	-0.375567	0.315645
155	0.737514	1.59536	0.784846	-0.412519	0.0877189	0.646372	0.724917	1.32199	0.830619	0.163866	0.653397	0.765082	0.644898	0.818084	0.575209	0.998363	0.425072	0.40937	0.291006	0.469782	1.00059	1.04388	0.873025	0.32263	0.47139	0.905346	2.35296	1.23824	0.952659	0.00799456	0.668878	0.689381	0.248486	155	0.83094	0.36827	0.749852	-0.13337	0.223331	0.21602	0.151326	0.745932	-0.0623938	-0.00691837	-1.64683	0.480706	0.378915	-0.194626	0.189847
156	0.629333	1.11719	0.553176	-0.434819	0.203692	0.321865	0.327224	1.09779	0.728243	0.526278	0.433664	0.563227	0.397278	0.138191	0.257982	0.545867	0.264867	0.676632	0.762183	1.01182	0.559547	1.06073	1.11682	-0.277982	0.491293	0.862787	2.46496	1.21868	0.867599	0.323449	0.529697	0.63764	0.403609	156	0.358024	0.251943	0.381276	-0.260118	0.452325	0.755217	0.239053	0.0244211	-0.330228	0.0530435	-0.496301	0.222267	0.0599019	1.06432	0.547328
157	0.847653	0.870306	0.533731	0.248852	0.0290934	0.273266	0.350891	1.10802	0.953702	0.209762	0.2682	0.847083	0.764865	0.467257	0.940793	1.15657	0.656765	0.792241	0.387383	0.947344	0.31075	1.04748	0.662799	-0.107614	0.609125	1.38092	2.34931	0.882885	0.408105	0.202602	0.686239	1.01058	0.529836	157	0.351564	0.140273	0.468747	-0.231165	-0.202673	0.656655	0.617541	0.428308	-0.0330461	-0.241285	-0.848051	0.421469	0.300798	0.328089	0.249173
158	0.771735	0.852351	0.473838	-0.419716	-0.104104	0.0934162	0.577472	0.895224	0.257192	0.165362	0.424857	0.339364	0.437937	0.39352	0.695579	0.717936	0.519162	0.398513	0.791464	0.636626	0.0392035	1.22262	0.84775	0.192234	0.83015	1.54762	2.37985	1.05312	1.10853	0.229261	0.603554	0.905403	0.416727	158	0.321557	0.477364	0.239541	0.146187	-0.284865	0.554901	0.453956	-0.0657936	-0.19034	-0.00972249	-0.680454	-0.0836498	0.0744364	0.546754	0.47141
159	1.1308	0.864471	0.782907	-0.479138	0.316058	0.159272	0.311017	0.972818	0.87907	0.193839	0.657549	0.549435	0.597056	0.58934	0.767411	0.681081	0.297729	0.556759	0.328777	0.745348	0.0370927	1.11646	1.07769	0.358803	0.650739	1.05405	2.16074	0.89076	0.757348	0.410362	0.668376	0.801561	0.32699	159	0.646522	0.153112	0.137198	0.248135	0.0378661	0.676233	0.47246	0.33543	0.510242	-0.487817	-0.494221	0.798941	-0.140534	0.153772	0.581203
160	1.07993	0.974065	0.631922	-0.171701	0.319416	0.225946	0.498659	1.01917	0.744865	0.195011	0.741139	0.519792	0.716895	0.489261	0.846157	0.657498	0.935291	0.341741	0.196729	0.891442	0.307352	1.41981	0.787424	-0.0170783	0.790548	1.34329	2.45421	0.71773	1.04648	0.400172	0.739072	0.707645	0.479951	160	0.156093	-0.0116908	0.317415	-0.656126	0.0521977	0.550809	0.0372031	0.0574017	0.352104	-0.0395449	-0.407767	1.78565	-0.380221	0.315639	0.173177
161	0.269867	0.894774	0.185035	0.369712	0.593899	0.297338	0.420024	1.08639	0.293076	0.346557	0.528086	0.796703	0.304789	0.740394	1.06749	0.420618	0.447879	0.485075	0.519487	0.729305	0.0662949	-0.0892996	0.847943	0.258207	0.887147	1.56159	1.9636	0.677263	0.906294	0.342331	0.221284	0.67322	0.435619	161	-0.00114076	0.35132	0.192611	-0.494061	-0.00172917	0.566936	0.471633	0.347346	0.234746	-0.601294	-0.291099	1.21556	-0.142064	-0.273689	0.403627
162	0.894683	1.41134	0.735632	0.113712	0.483096	0.306164	0.712143	1.18598	0.778606	0.337004	0.45207	0.214496	0.922435	0.55099	0.787314	0.898877	1.04062	0.542438	0.946646	0.977831	0.577685	1.25075	0.753494	-0.104932	0.407319	1.36897	2.28894	0.998319	0.386789	0.156346	0.298396	0.541872	0.533907	162	0.222615	0.0528809	0.39566	0.0267345	-0.0955372	0.476787	0.347107	0.544778	0.171068	0.354662	-0.302553	0.93882	0.327178	0.143059	0.309306
163	0.759938	1.39297	0.992519	0.175101	-0.036978	0.0945621	0.715371	1.08852	1.19172	0.378027	0.174045	0.673663	0.909374	0.456683	1.10407	0.99891	0.573408	0.90109	0.4063	0.631949	0.862826	0.359701	0.776635	0.0774008	0.6639	1.28784	1.99382	0.338756	0.9021	0.317005	0.562699	1.01287	0.485898	163	-0.00539768	0.250509	0.27114	-0.334794	-0.0293264	0.781139	0.0700715	0.373861	0.132466	-0.198497	-0.102887	1.35722	0.200729	-0.0776279	0.364948
164	0.86293	0.973044	0.741952	0.524156	0.173054	0.347363	0.414627	0.992116	0.00868952	0.358737	0.939009	0.591918	0.816082	0.406645	1.20052	0.874059	0.752839	0.540862	-0.267865	0.191326	0.174881	0.471022	0.64548	0.219446	0.377259	1.65118	1.83986	0.733424	0.819331	0.145299	0.363155	0.855916	0.468795	164	0.586756	-0.0554538	0.634362	-0.639724	0.337285	0.610946	0.851094	0.314575	0.0711507	-0.274636	-0.288482	1.57591	-0.0611978	0.177042	0.209469
165	0.932496	1.37369	0.714818	-0.0113447	0.582737	0.353423	0.192063	0.756409	0.0205301	0.0845095	0.825189	0.178018	1.16323	0.337207	0.580223	1.75064	0.315798	0.111307	0.702662	0.707842	0.438809	0.751403	0.838483	0.28601	0.108215	1.79797	1.84987	0.713115	0.797185	0.435615	0.628659	0.558232	0.658676	165	0.158442	-0.202899	0.81602	0.161454	0.318094	1.02612	0.420784	0.400317	0.282643	-0.425526	-0.0318317	0.992965	-0.330711	0.235855	-0.187477
166	1.15738	1.17361	0.879664	-0.0593678	0.935386	0.209839	0.654389	1.50615	0.264657	0.411261	0.142111	0.466087	0.752247	0.385337	0.668866	1.09994	0.442764	0.470083	-0.301796	0.852929	0.599112	1.28941	0.877987	0.272294	0.389022	1.11815	1.92814	0.559609	1.17354	-0.197641	0.607802	0.796638	0.622293	166	0.599535	0.0392998	0.479334	-0.0109401	0.167082	1.05313	0.780558	0.155939	0.236676	-0.639931	-0.61494	0.973598	-0.131576	-0.0292983	0.249698
167	0.719485	0.981592	0.926263	-0.0192147	0.680419	-0.0065696	0.0435459	1.50097	0.074801	0.713356	0.843041	0.56439	0.543461	0.637032	0.689595	1.01996	0.458728	0.609917	0.662985	0.525894	0.529935	0.867693	0.863869	-0.239485	0.311899	0.882914	2.37245	0.324415	0.204131	0.291567	1.07534	0.450674	0.519238	167	0.0399333	0.0114377	0.519744	0.0645448	0.20705	0.180692	0.546765	0.0791049	-0.158678	-0.457998	-0.195355	0.862697	0.0312557	0.0754698	0.631575
168	0.603941	0.389611	0.952133	0.250604	0.124109	-0.247031	0.802018	1.61137	0.294445	0.58003	0.453747	0.181518	0.113712	0.736083	0.800185	0.883854	1.00768	0.267553	0.686743	0.900435	0.604127	1.28735	0.964921	-0.102432	0.351991	1.0477	1.70921	0.567798	0.174978	0.350434	0.640715	0.736245	0.382839	168	0.0745883	0.0538897	0.373876	-0.129688	0.619676	0.882169	0.883318	0.279056	0.203573	-0.739727	-0.999689	0.60193	-0.0411069	-0.103408	-0.00521454
169	0.815299	0.798558	0.800284	0.214677	0.470774	-0.0487138	-0.458813	1.17223	0.181761	0.502149	0.689506	0.313885	0.512621	0.427926	0.437692	0.891217	0.783346	0.49085	0.882828	0.546273	-0.162194	0.98558	0.961722	-0.0329672	0.153296	0.705425	2.15004	0.626955	0.61268	0.252033	0.739847	0.946284	0.297556	169	0.547861	-0.232773	0.485882	0.332916	0.118788	0.857704	0.540006	0.395128	-0.0665355	-0.0641259	-0.45649	0.482946	0.130877	0.158553	0.322763
170	1.05988	0.580549	0.802854	-0.306409	0.321028	-0.107208	-0.0999348	1.50924	0.29352	0.610578	0.871296	0.423951	0.60494	0.442026	0.506461	0.691693	0.603213	0.654266	0.0352905	0.782156	0.772535	0.729597	1.04803	0.246489	0.244752	1.06899	2.33452	0.943026	0.606367	0.184831	0.682556	0.657325	0.386897	170	0.577256	-0.380149	0.0189713	0.155764	0.220566	0.887419	0.506804	0.163805	0.0767213	-0.200739	0.18203	0.692948	0.190252	0.041775	0.389532
171	1.06233	0.571706	0.9606	-0.146344	0.956245	-0.170844	0.4276	1.33506	0.695383	0.401115	0.410762	0.838835	0.816664	0.567875	0.767707	0.688475	0.749244	0.746412	0.371906	1.0112	-0.134512	0.747436	0.862995	0.372915	0.34322	1.27477	1.98468	0.410488	0.585225	0.351719	0.766362	0.353777	0.748866	171	-0.354102	-0.230816	0.376954	-0.0790699	0.495147	0.633741	0.10838	0.493827	0.0651371	-0.733558	-0.0211705	0.532682	0.326867	0.0120451	-0.047539
172	0.877489	0.378979	0.544175	0.186123	1.24668	0.0367623	0.127933	1.27287	0.290395	0.281836	0.642583	0.967056	0.818609	0.62597	0.669423	0.970305	0.679115	0.533855	0.317603	0.293469	0.311931	1.01637	0.883101	0.33362	0.394299	1.33153	2.72534	0.494736	0.672416	0.0796643	1.0009	0.695316	0.611696	172	0.415202	-0.326129	0.511399	-0.540697	0.466542	1.03104	0.27907	0.3091	0.0114905	-0.358092	-0.0944565	0.772131	0.0763312	-0.0655144	0.148333
173	0.899945	0.585611	0.868686	-0.46786	0.678522	0.177735	0.436477	1.1591	1.13927	0.213789	0.241627	0.781478	0.659114	0.275277	0.662077	0.384347	0.629118	0.715757	0.612832	0.269939	-0.233685	0.443618	1.10621	0.305403	0.384191	1.06959	3.20653	0.783729	0.781994	0.0787739	0.270084	0.678647	0.687046	173	0.0893433	-0.237952	0.338093	0.322545	0.63377	0.763947	0.602957	0.0523504	0.23129	-0.257134	-0.101111	0.296373	0.0983158	0.213281	-0.0454989
174	0.75272	0.856588	0.936415	0.318497	0.511617	0.148017	0.46614	1.01742	0.66901	0.192103	0.554058	0.772408	0.380526	0.287827	0.554492	0.811814	0.369849	0.656947	0.821616	0.53784	0.706258	1.02193	1.07726	0.489839	0.327297	1.24625	2.40659	0.621449	0.940834	0.64887	0.224529	0.780137	0.608531	174	-0.56891	0.0660729	0.492729	-0.178733	0.882783	-0.0398157	0.527425	0.48337	0.0642679	-0.146696	0.0204739	0.338077	0.182039	0.390584	0.00171029
175	0.747527	0.299187	0.953394	-0.230299	0.475496	0.287381	0.74774	0.857537	1.14691	0.544335	0.650682	0.902696	0.629981	0.260956	0.832166	0.804395	0.829044	0.402581	0.46837	0.612934	0.83055	0.131301	1.44322	0.265442	0.604006	1.21863	1.95248	0.399866	0.6411	-0.00306925	0.646352	0.902162	0.647693	175	0.162826	0.239139	0.392022	-0.434897	0.828361	0.45406	0.247922	0.408933	-0.194265	-0.286319	0.536697	0.581687	0.259393	-0.0109638	0.301887
176	0.713443	0.612072	1.337	-0.486255	0.566172	0.181177	0.939085	1.25044	0.846842	0.146698	0.710467	0.317702	0.103078	0.489378	-0.285401	0.684921	0.667667	0.714569	0.032462	0.560434	0.264721	1.10296	1.05866	0.64513	0.414008	1.12177	1.90515	1.01191	0.615191	-0.0809239	0.539964	0.923326	0.585902	176	-0.149196	0.0454951	0.124749	0.0341242	1.6797	0.965635	0.563883	0.11624	-0.285851	-0.23106	-0.202484	0.456839	0.0591615	-0.0240603	0.151534
177	0.856824	0.406123	0.364897	0.106028	0.422089	0.0462293	0.670058	1.36286	0.810559	0.117931	0.340794	0.622135	0.518882	0.133535	0.47072	0.678899	0.399665	0.458404	0.346669	0.426091	0.678757	1.2543	0.578713	0.508956	0.820205	1.47008	2.09261	0.257149	1.16694	0.0709307	0.668343	0.7045	0.464061	177	0.35396	0.104842	0.659318	0.12877	0.953099	0.545015	0.608069	0.121677	-0.280476	0.00590589	-0.308769	0.462995	-0.0495052	0.840465	0.580529
178	0.816841	0.348979	1.07434	0.537567	0.415226	0.181746	0.659522	1.06265	0.729681	0.363621	0.375275	0.507192	0.732574	0.465335	0.399502	1.12625	0.424541	0.398596	0.522301	0.500651	0.634393	0.904022	0.689297	0.534994	0.741415	1.2365	1.81154	0.791377	1.2085	-0.123938	0.529959	0.837601	0.629123	178	0.140738	0.118357	0.555098	-0.329228	0.920494	0.529955	0.215129	0.424918	-0.252576	0.0942701	0.171695	-0.250131	-0.205759	0.925638	0.218872
179	0.451359	0.482008	0.863396	0.0681783	0.10566	0.294556	0.604448	0.863872	0.184037	0.581423	0.848828	0.457466	0.829554	0.718974	0.532758	0.962363	0.599253	0.289725	-0.248617	0.37525	0.405418	0.933375	0.530472	0.281155	0.43782	1.17684	1.35684	0.918763	0.92848	0.146223	0.610467	1.75593	0.509306	179	0.608628	-0.0334457	0.834457	-0.376809	0.836055	0.689569	0.453184	1.03767	-0.350843	0.202952	-0.434026	-0.163652	0.460917	0.374033	0.288063
180	0.47225	0.499193	0.527678	-0.390987	-0.00758171	0.370862	0.826113	0.604698	0.514609	-0.0991808	0.188209	0.492027	1.21941	0.51298	0.162196	1.03855	0.334684	-0.121232	0.644604	0.44611	0.65671	0.879987	0.710626	0.126305	0.142561	1.41673	1.73329	0.803567	1.17016	-0.024073	0.640792	1.02909	0.533625	180	-0.150297	0.173271	0.580804	-0.340355	-0.642178	0.369925	0.499954	-0.139246	-0.378744	0.0721141	-0.809192	-0.040677	0.504967	0.0394071	0.288309
181	1.41709	0.00233977	0.358681	-0.176354	0.144484	0.154434	0.790808	0.964342	1.05245	0.114891	0.172527	0.815601	0.729997	0.513347	0.739792	0.760666	0.409931	0.389487	0.115137	0.498746	0.451195	0.850599	0.740527	0.389897	0.635418	1.14495	1.90502	0.632532	0.502939	0.5998	0.502077	1.24312	0.632377	181	0.341878	0.220661	0.541826	-0.368199	-0.329423	0.460673	0.602724	-0.0462242	0.0473373	0.0268539	-0.0524951	0.236498	0.286627	0.170247	0.393029
182	1.05708	0.376145	0.88975	0.0444529	0.188352	0.143718	0.947196	1.14988	0.50024	0.199039	0.56561	0.539669	0.758957	0.188252	0.151811	1.26121	0.447892	0.648916	0.766819	0.887553	0.181895	0.250497	0.875012	0.0524684	0.823076	1.20953	1.74954	0.653906	0.547041	0.308581	0.404599	1.07866	0.555505	182	0.37416	-0.101489	0.46978	-0.0720942	-0.187674	0.285924	0.568233	-0.0252509	-0.604797	-0.0888609	-0.374872	-0.201772	0.234416	0.165333	1.41762
183	0.242811	-0.0804193	0.93755	0.33092	0.458707	0.135397	0.845419	1.0077	0.642362	-0.287611	0.462778	0.459536	0.699937	0.40051	0.970313	0.955117	0.349648	0.704061	0.347735	0.34239	0.0212712	0.482487	1.02667	-0.0773242	0.683781	0.990466	1.77323	0.720381	0.412024	0.268183	0.640561	1.24593	0.511153	183	0.437057	-0.176449	0.397843	0.15553	0.116655	0.457522	0.169271	0.49153	-0.487337	-0.205976	0.0566093	0.0809429	-0.219857	-0.138819	1.28204
184	0.856572	0.0288427	0.547458	0.182303	0.133456	0.411405	0.457277	1.15773	0.522414	-0.025141	0.386418	0.479873	0.741402	0.42611	0.48826	0.420002	0.608398	0.113954	0.657075	1.09607	0.384654	0.324326	1.27208	-0.0159291	0.76206	0.980744	1.58632	0.591366	1.04299	0.142011	0.405991	1.22481	0.587034	184	-0.135269	0.123607	0.313159	-0.161746	0.321966	0.716439	-0.0226774	0.0568316	-0.647411	-0.42939	-0.0357439	0.412873	0.102582	-0.341099	0.784312
185	1.03956	0.0646883	0.456871	0.432462	0.424341	0.808665	0.619194	1.03118	0.769459	0.550571	0.450293	0.447581	0.691792	0.305143	0.435158	0.717064	0.542999	0.403972	0.712777	0.272011	0.640199	0.726628	0.56959	-0.322729	0.710228	1.25718	1.55114	0.804039	0.417044	0.28103	0.368477	1.02125	0.492783	185	-0.144031	0.331564	0.681619	-0.227736	-0.133266	0.478867	0.423414	0.593244	-0.507242	-0.49928	-0.106569	0.152106	0.239675	-0.4064	0.589105
186	0.97586	-0.528497	0.432897	0.279895	0.113305	0.337991	0.609384	1.16899	0.510135	0.368493	0.254896	0.382195	0.463642	0.255743	1.1689	0.825958	0.703455	0.561804	0.152438	0.923918	0.323219	1.20286	0.98557	0.078952	0.36485	1.22812	1.72305	0.702671	-0.0781317	0.585488	0.39472	1.14112	0.515628	186	0.22696	0.0104567	0.290756	0.101226	-0.162904	1.15492	0.61493	0.222455	-0.125885	-0.61281	0.157284	0.0995833	-0.00386038	0.158135	0.438719
187	1.01814	0.204337	0.541306	0.511111	-0.0612367	0.346862	0.125331	0.804702	0.627559	0.228074	0.294078	0.241196	0.589667	0.718827	0.857377	0.549356	0.274378	0.450327	-0.0952865	0.11507	0.116335	0.406201	0.970775	0.356737	0.633845	0.786303	1.51887	0.610002	0.330101	-0.189039	0.695601	1.19777	0.275773	187	0.157356	-0.226203	0.671374	-0.700569	0.559671	0.549301	0.274752	-0.230039	-0.0189717	-0.730955	-0.105924	0.324072	0.00936338	-1.14619	0.241539
188	0.843266	0.0860228	0.449181	0.312585	0.268412	0.399566	-0.057477	0.784789	0.262546	0.358765	0.469706	0.577189	1.17637	0.440704	0.569466	0.750095	0.378474	0.327749	0.306938	0.406889	0.27248	0.724171	0.53852	0.304386	0.750653	0.878263	1.51963	0.462969	0.863738	0.237224	0.554723	1.06252	0.199746	188	0.121853	-0.0750448	0.342044	-0.321933	0.186156	0.684233	0.288251	0.127239	0.0574857	-0.671275	-1.19914	0.348897	-0.779951	-0.666631	0.569418
189	0.776597	0.0148678	0.540167	-0.262085	0.329382	-0.0170952	0.147921	1.13871	0.210685	0.049291	0.195398	0.223986	1.00539	0.136877	0.378709	1.04571	0.0313061	0.367863	0.296919	0.365199	-0.0497638	0.596925	0.776133	0.12351	0.38824	1.18689	1.73224	0.190001	0.27033	0.236018	0.476322	1.0711	0.345519	189	-0.16447	0.0512796	0.185568	-0.32743	0.267802	0.721117	0.162767	0.486914	-0.254629	-0.849674	-0.404492	0.320281	-0.267296	-0.534173	0.603747
190	0.859064	0.253568	0.680218	1.0496	0.046403	0.332295	-0.0138909	0.877675	0.501495	0.169419	0.554169	0.20561	0.516873	0.434648	0.785977	0.307916	0.439147	0.426487	0.981109	0.538993	0.35414	0.923418	0.785019	0.350878	0.450227	0.924675	1.04445	0.511921	0.356522	-0.00320665	0.504329	1.1782	0.31051	190	0.100673	0.0635978	0.189264	-0.374989	0.239759	0.754931	-0.218517	0.391673	-0.275231	-0.273343	-0.312563	-0.047777	-0.106812	-0.349479	0.533653
191	1.14638	0.280655	0.442396	0.666473	-0.235603	0.69711	0.264498	0.627271	0.395072	-0.109796	0.455788	0.563547	-0.087343	0.508511	0.391016	0.569357	0.30086	0.518452	0.544793	0.984043	0.497365	0.000707765	0.780014	0.106974	0.494979	0.856044	1.1865	0.126297	0.350915	0.474146	0.336718	1.09786	0.518515	191	0.0605767	-0.0392025	0.594744	-0.210557	0.831929	0.579681	0.353944	0.681233	-0.181541	-0.79177	0.965135	0.236835	0.283605	-0.233279	0.691243
192	1.06948	0.221455	0.648681	0.545768	-0.405752	0.450187	0.23837	0.329459	0.283556	0.175625	-0.162254	0.366077	0.66006	0.268291	0.751968	0.907299	0.370067	0.496116	0.161919	0.699716	0.118204	0.871817	1.20268	-0.0699073	0.752725	1.09692	1.2038	0.246319	0.406607	-0.045957	0.653105	1.0701	0.544106	192	0.422382	-0.289325	0.0804892	-0.518142	0.682939	0.777679	0.452038	0.501839	-0.168512	-0.849666	0.315916	0.283821	0.156786	-0.147347	0.385669
193	0.845533	0.453659	0.741858	0.255025	-0.167956	0.683674	0.560541	0.608133	0.21412	0.29713	0.381287	0.272779	0.647882	0.538064	0.299658	0.670401	0.194827	0.675607	0.127969	0.629546	0.471545	0.56872	1.0151	0.0750583	0.398467	0.932507	0.987858	0.492696	0.320076	-0.0579858	0.527726	1.11919	0.468353	193	0.271028	0.157377	-0.211603	-0.392409	0.463196	0.418362	0.374699	0.632971	0.0137398	-0.619478	0.173554	0.328543	0.312378	-0.661137	0.289505
194	0.838816	0.991504	0.4413	0.162754	-0.191816	0.445679	0.140338	-0.451055	0.174533	0.07651	0.556868	0.459893	0.907116	0.414499	0.201036	0.739488	0.84796	0.646508	0.719132	0.489779	0.433333	0.373075	0.645953	-0.298833	0.404228	0.874983	0.448738	0.471639	0.81137	0.300599	0.585137	1.04639	1.09174	194	-0.0346119	0.100866	0.104078	-0.425342	0.324609	0.405307	0.18279	0.885313	0.0637512	-0.647953	-0.120177	0.191795	0.452362	-0.771287	0.0244641
195	0.872568	0.677746	0.477724	1.85507	-0.715249	0.423862	0.628004	0.609216	0.399435	0.122819	0.273204	0.214694	0.204774	0.787027	0.603435	1.09284	0.630596	0.703095	0.306611	0.918934	0.538463	0.417607	1.25489	0.185897	0.471941	1.01818	1.21195	0.588893	1.21269	0.551355	0.41491	0.716249	0.834921	195	0.453908	0.0274278	0.215734	-0.191058	0.357612	0.50261	0.324723	0.0318162	-0.0687442	-0.282777	0.167304	0.243847	-0.187649	-0.384537	0.0162117
196	0.752509	0.31114	0.523818	1.45741	-0.414594	0.248477	0.325	1.1742	0.634081	0.199677	0.466793	0.699912	0.313592	0.493469	0.82571	0.852778	0.594532	0.582166	0.509971	0.324991	-0.181067	0.328698	0.849022	0.44049	0.45454	0.911439	1.06683	0.198339	1.62824	0.285567	0.436092	0.949972	0.787699	196	0.420255	-0.327879	0.398112	-0.184363	0.39039	0.84379	0.552656	0.496539	-0.243549	-0.12713	0.223299	0.143941	0.215724	-0.148708	-0.0689094
197	0.737746	0.218233	0.760817	1.4272	-0.681924	0.371776	0.443882	0.322058	0.441754	0.132756	0.322242	0.266228	0.340011	0.382437	0.20567	0.759459	0.678274	0.524805	0.615827	0.68864	0.393935	0.103241	0.496214	0.399568	0.319645	0.522334	1.02883	0.52457	1.2273	-0.164891	0.429599	0.922983	0.663912	197	0.515574	-0.072079	0.497545	-0.0721485	0.377782	0.363123	0.227068	0.397078	0.288609	-0.634228	0.120378	0.458022	0.247492	-0.0263334	-0.0369571
198	0.32052	0.765771	0.671873	0.780854	-0.224066	0.109383	0.201322	0.597032	0.434352	-0.0858047	0.359084	0.485455	0.569612	0.660991	0.545482	0.875699	0.362273	0.56966	0.166688	0.323409	0.329687	0.918587	0.4665	-0.248221	0.449208	0.546944	0.964208	0.54046	1.42672	-0.0108954	0.454474	0.937524	0.462438	198	0.160098	0.109187	0.137853	-0.4208	0.465652	0.259909	0.583106	0.437676	0.196864	-0.593722	0.423859	0.611393	0.316193	0.0179209	0.068169
199	0.373794	0.828102	0.290524	0.502142	-0.364912	0.869914	-0.350834	0.667463	0.149545	-0.224566	0.276905	0.232544	0.408983	0.707343	0.85844	0.705298	0.846963	0.378308	0.540491	0.546009	0.67364	0.125851	0.326809	0.164381	-0.263681	0.478818	0.993703	0.252842	1.05423	-0.0574475	0.477756	0.826389	0.39395	199	0.445445	0.15655	0.29395	-0.00866545	-0.0169913	0.702658	-0.130156	0.5798	-0.41399	-0.380481	0.0904577	0.389213	0.050658	-0.221123	0.331729
200	0.619622	0.841116	0.334764	0.478848	0.0447583	0.785208	0.103239	1.0071	0.510502	0.211349	0.55158	0.403925	-0.287056	0.052258	0.678223	1.31374	0.841684	0.538281	0.444623	0.893146	0.361628	0.477354	0.521813	0.317775	-0.155049	0.322764	0.837548	0.289485	1.09094	0.0184142	0.527658	0.956671	0.359218	200	0.34386	0.267592	0.448236	0.0924858	0.525883	0.0751067	0.150281	0.275648	-0.328983	-0.784056	-0.263222	0.0986759	0.302315	-0.190321	0.323747
201	0.241299	0.863179	0.469632	-1.17132	-0.354727	0.880591	0.381725	0.76889	0.289583	0.118867	0.594873	0.135602	0.432975	0.32115	0.793143	0.899101	0.954702	0.661144	0.443428	0.832546	0.436044	0.711084	0.20494	0.5259	-0.19752	0.929151	0.912647	0.891392	1.33914	-0.141964	0.730425	0.997125	0.281722	201	0.34266	-0.323208	0.555898	-0.279155	0.222514	0.180192	0.0912675	0.630836	-0.212893	-0.703948	-0.43068	0.523044	0.16367	-0.592477	0.24748
202	0.26225	0.568018	0.754727	-0.868652	-0.0875471	-0.116379	0.402713	0.827182	0.557363	0.135748	0.654369	0.316933	0.864439	0.125562	0.513359	0.632818	1.05781	0.76647	0.479205	0.527517	0.338283	0.456507	0.95337	-0.464542	-0.321266	1.05326	1.01252	1.46012	0.816475	-0.170385	0.477624	0.9401	0.468279	202	0.29717	0.115001	0.340378	-0.622916	0.554973	0.741661	0.270175	0.00951567	-0.028552	-0.838878	-0.468697	-0.114631	0.0577208	-0.187041	0.139918
203	0.900369	0.529015	0.345065	-0.762447	-0.0715443	0.61006	0.563378	0.73727	0.540326	0.162	0.794466	0.317586	0.589807	0.32828	-0.0254803	0.818686	0.828409	0.216988	0.526703	0.633426	0.341135	0.665141	0.292614	-0.310376	0.149453	0.86338	0.693032	0.826237	0.816385	-0.00622241	0.496384	0.846001	0.588687	203	0.518778	-0.13841	0.434681	-0.365267	0.575753	0.70451	0.314614	-0.283951	-0.156451	-0.564945	-0.0613384	-0.302771	0.513311	-0.394925	0.23685
204	0.551441	0.292866	0.502833	-0.227037	-0.366712	0.486495	0.237591	0.779517	0.412585	0.204255	0.420296	0.395042	0.860742	0.280414	0.0865928	0.440221	0.871287	0.651813	0.118491	0.657305	0.138682	0.547038	0.687854	-0.609306	-0.271919	1.03644	0.567267	0.730057	0.970444	-0.207585	0.440961	0.935954	0.0207384	204	0.703335	-0.266629	0.230992	-0.779964	0.454399	0.440847	0.393139	0.1284	-0.19462	-0.551895	0.334352	0.344564	0.318058	-0.0759431	-0.327683
205	0.216978	0.631925	0.825489	-0.284044	-0.0349425	0.00579251	0.28303	0.847471	0.349333	0.0443107	0.414098	0.342156	0.232066	0.204808	0.514834	0.746016	0.983402	0.672413	0.138479	0.618585	0.0731995	0.656626	0.15799	0.356838	-0.136369	0.973951	0.804944	1.01479	0.722828	-0.105094	0.303838	0.926478	0.191401	205	0.286935	0.125488	0.422952	-0.125438	0.290558	0.358886	0.408561	0.155123	0.163004	-0.900875	0.36318	1.40319	0.371238	0.231456	-0.511735
206	0.466056	0.758269	0.783882	-0.509026	-0.328249	-0.205426	0.149511	1.51226	0.351503	0.160555	0.417074	0.432078	0.849606	0.28089	0.835334	0.717183	0.802763	0.280205	0.237116	0.630741	-0.109767	0.27356	0.575218	0.0854959	-0.178397	0.913177	0.808538	0.870367	0.843712	-0.156555	0.363694	0.984416	0.0999872	206	0.503036	-0.0810433	-0.104618	-0.389567	0.539008	0.489183	0.116704	-0.0569388	-0.281649	-0.608166	0.287039	0.595473	-0.125056	-0.261353	-0.0849008
207	0.224992	0.881832	0.623459	0.149277	-0.365824	-0.476212	0.275238	1.15243	0.464183	-0.166969	0.49772	0.300052	0.600701	0.396074	0.38587	0.175945	0.753718	0.480333	0.271468	0.64116	0.40525	0.836379	0.889838	0.0211554	0.0328044	0.32402	1.11544	0.733304	0.756224	0.129064	0.309537	1.02745	0.268497	207	-0.574882	0.0967263	-0.116026	-0.313729	0.578302	0.503587	0.319966	-0.112949	-0.336124	-0.324559	0.484244	0.141854	0.162252	0.0554531	0.112575
208	0.785282	0.435937	0.844111	-0.180976	0.157719	0.136756	0.402558	1.68165	0.416666	0.00933238	0.162521	0.559481	-0.0183652	0.408321	0.46307	0.764566	0.346073	0.229845	0.534301	0.363478	0.258916	0.393545	0.31714	0.458891	0.0792839	0.357698	1.59232	0.862016	0.932479	0.107929	0.286885	0.969392	0.225798	208	-0.243524	-0.667688	0.226612	-0.147571	0.48546	-0.0151885	0.369889	0.0422881	-0.125049	-0.657407	0.11685	-0.193868	-0.72317	-0.0224996	-0.0123341
209	0.179274	0.418147	0.515113	-0.0408873	0.0306444	-0.232707	0.319632	1.39719	0.680523	0.237212	-0.0217529	0.516241	0.616597	0.484068	-0.217606	1.01547	0.403322	0.317099	0.174591	-0.119626	0.403745	0.221022	0.629489	0.0492718	-0.259345	0.475285	1.67433	0.543457	0.685722	0.0581093	0.267487	0.835559	0.331109	209	0.51807	-0.0746271	0.455352	-0.259738	0.425377	0.327428	-0.0358658	-0.0210348	-0.124537	-0.481709	0.295413	0.289719	-0.587012	-0.359511	0.129812
210	0.0763704	0.277707	0.928588	0.132704	0.0534579	0.38284	0.558016	1.159	0.629432	0.171647	0.635122	0.409091	0.44186	-0.127356	0.0096133	0.637598	0.11166	0.223905	0.44533	0.297466	0.0232644	0.440557	0.2566	0.0725902	0.125317	0.845734	1.51114	0.174382	0.662217	0.035027	0.122169	0.889411	0.501615	210	0.460528	-0.058185	0.146889	-0.30307	0.453639	-0.327823	0.24955	-0.274587	0.129362	-0.0512881	0.315597	-0.0908854	-0.306725	-0.0887974	0.191641
211	0.136285	0.200532	0.394548	0.286681	0.035326	0.311605	0.804373	1.36606	0.955693	-0.0248572	0.421207	0.283376	-0.171721	0.223919	-0.00158284	1.1076	0.263551	0.21829	-0.697615	-0.110329	0.310507	-0.0393887	0.897092	0.166498	-0.121489	0.486881	1.12852	0.462529	0.688417	0.249854	0.195428	1.02364	0.275743	211	0.216023	0.273947	0.37659	-0.170411	1.33902	0.425017	0.24317	0.537973	0.0388775	-0.44589	-0.0742084	0.169496	-0.108502	0.128826	0.32129
212	0.664233	0.464556	0.642481	0.131956	-0.410674	0.0694509	0.675411	0.806726	0.741102	0.212299	0.597303	-0.0675077	0.349393	0.409379	0.887697	0.660674	0.496885	0.646326	0.339988	0.519321	0.500802	0.23713	-0.016404	-0.171609	0.203471	0.454298	1.24773	0.199934	0.700959	0.11594	-0.0835333	0.705693	0.223136	212	0.725782	0.100045	0.210794	-0.491383	1.20383	0.0202602	0.345836	0.0386162	0.351892	-0.204419	0.647559	1.08585	-0.204278	-0.116659	-0.685008
213	0.394938	0.545215	0.681896	0.0246023	-0.224066	0.214962	0.757847	0.880646	0.177014	-0.307892	-0.110528	0.242344	0.318748	0.205436	0.512224	0.61644	0.509619	0.625195	0.151186	-0.017566	0.000966175	0.499553	0.517667	0.319741	0.38205	-0.070032	1.38254	0.227743	0.639345	0.286214	0.0475617	0.845274	0.608956	213	0.176582	-0.473084	0.130169	-0.0615696	0.994373	0.422643	0.0839137	0.302763	0.0445999	-0.320855	0.102883	0.740898	-0.134685	-0.289388	-0.384022
214	0.256983	0.323388	0.783859	0.362475	0.20173	0.549569	0.445009	1.03158	0.42499	0.136668	0.563892	0.430199	0.387534	0.166457	0.518577	0.855936	0.443257	0.699869	0.344119	0.43428	-0.0615769	-0.0275459	0.595132	0.166529	0.176303	0.00944743	1.42438	0.163715	0.310507	0.0133858	-0.354749	0.712563	0.293571	214	0.358515	0.0409258	0.376503	-0.354087	1.10698	0.206661	-0.0750419	0.138755	-0.189675	0.1976	-0.733552	0.304309	-0.178722	-0.0246352	-0.348534
215	0.316898	0.638721	0.600389	0.317639	0.165364	0.587559	0.424679	0.833625	-0.0397362	0.254971	0.513694	0.316718	0.496431	0.265235	0.390569	0.762448	0.425871	0.961888	0.378899	0.182001	-0.0349022	0.328383	0.533627	-0.00243922	0.13319	0.257111	1.20794	0.295656	0.60951	0.149268	-0.17227	0.91929	0.25628	215	0.424949	-0.193893	0.247879	-0.114072	0.789996	0.364479	-0.0419484	0.350973	-0.266355	0.773356	-0.370871	0.683493	-0.0113686	0.32451	0.175781
216	0.501811	0.512146	0.762791	0.171101	0.124178	0.41636	0.638932	1.24936	0.652333	0.037958	0.141911	0.117007	0.53192	0.172342	0.153732	0.992108	0.511076	0.668955	0.127106	0.351781	0.146922	-0.0853808	0.472335	0.232823	0.643081	0.313305	1.09722	0.284264	0.638095	0.290918	-0.00596286	0.370513	0.133358	216	0.0483781	-0.00730086	-0.0217084	-0.892546	0.681314	-0.171545	0.141343	0.48626	0.0772231	0.631121	-0.0287781	0.789912	0.0636156	0.26762	0.0705764
217	0.835519	0.480927	0.85441	-0.648889	0.312093	0.334492	0.477447	1.2735	-0.0578775	0.198806	0.189447	0.34633	0.389229	-0.115717	0.395787	0.822293	0.518873	0.452996	0.126209	-0.227066	0.24107	0.259016	0.361957	0.386442	0.149031	0.533019	1.05313	0.37931	0.295757	-0.21973	-0.0285837	0.400792	0.135243	217	0.446633	-0.00761519	0.16604	0.308342	0.538547	0.480279	-0.206825	0.732162	-0.183415	0.517522	0.273692	1.22131	-0.885263	0.0547398	0.495436
218	0.98486	0.395471	0.325594	0.330819	0.165861	0.792019	0.272821	0.587524	0.657431	0.378957	0.422657	0.0321803	0.482009	0.417005	0.171159	0.789071	0.553961	0.6912	0.45223	0.644926	0.5595	0.441483	0.63972	0.081822	0.418649	0.721652	1.1043	0.159589	0.644151	-0.0448254	0.119006	0.446211	0.340213	218	0.194393	0.107934	0.0968528	0.0191876	0.598152	0.556526	0.340025	-0.0680262	-0.00970794	0.288637	-1.35488	1.19047	-0.654497	-0.0684279	0.456362
219	0.143983	0.536926	0.858096	0.270725	0.0411963	0.428013	0.268389	0.992317	0.460005	0.111981	0.377288	0.175118	0.711761	0.655059	0.676154	0.630413	0.48093	0.445944	0.43158	0.475212	0.0397364	0.0692134	0.450961	0.153711	0.00565392	0.647589	0.714784	0.304218	0.869368	0.227392	-0.0735212	0.558423	0.424904	219	-0.0414378	0.0259554	0.257971	-0.434076	0.51486	0.208782	-0.124087	-0.0129595	-0.187339	-0.253694	0.224513	1.10259	-0.566643	-1.13286	0.200165
220	0.360076	0.446821	0.431075	0.452985	0.242671	0.673938	0.436531	1.22467	-0.673959	0.194457	0.136332	0.115279	0.286236	0.27813	0.367182	0.848784	0.202383	0.515903	0.223998	0.778245	0.355825	0.366594	0.834755	0.470208	0.221034	0.363882	0.662237	0.201066	0.69761	-0.0674352	0.033464	0.427813	0.37537	220	-0.4646	-0.184157	0.419962	0.152324	0.632455	0.153041	0.418574	0.0925638	-0.240913	0.126413	-0.375663	0.70136	-0.54292	-1.35619	-0.457555
221	-0.0571905	0.412675	0.659626	0.0195028	0.311279	0.423471	0.29748	1.27228	-0.270337	0.0812699	0.321194	0.395705	0.603189	0.286123	0.664412	0.710238	0.615226	0.43382	0.346585	0.58041	0.031793	0.151938	1.05606	0.197773	0.494549	1.06597	0.438152	-0.0162113	0.470589	-0.488222	0.255926	0.634067	0.238784	221	0.157878	-0.0397034	0.423855	0.0369042	0.325131	0.668389	0.277892	0.383199	-0.621454	-0.28523	0.371959	0.982955	-0.481696	-0.871753	-0.278914
222	0.40595	0.31711	0.677069	0.341154	0.632492	0.555895	-0.130093	0.511794	-0.028333	0.280809	0.371962	0.257943	0.542163	-0.121599	0.0889387	0.30987	0.120183	-0.0134338	0.240759	0.235038	0.104264	0.385044	1.38916	-0.10512	0.0801476	0.88522	0.737595	0.480445	0.242554	-0.334373	0.164413	0.616893	0.416522	222	-0.218498	0.0696465	0.358269	-0.175118	-0.931386	0.650699	0.466429	0.0489184	-0.0164274	-0.389887	0.0661571	0.664716	-0.508211	-0.85481	-0.0142081
223	0.494296	0.285061	0.654675	0.318753	0.559695	0.556213	0.131279	0.717606	0.39325	0.380453	0.131762	0.0262134	0.718056	0.481871	0.135745	1.07115	0.580116	0.545527	0.0416724	0.0273423	0.410406	0.0477373	0.564002	0.187285	0.936638	0.643962	0.840833	0.0400684	0.580703	-0.332915	0.450941	0.949067	0.591207	223	0.15479	-0.20928	0.378053	0.245513	-0.805207	0.160633	-0.00444313	0.149552	-0.5076	-0.471064	-0.0946773	0.312028	0.0696391	-0.619772	0.906995
224	0.541551	-0.0771856	0.34529	0.297352	0.274424	0.616408	0.383516	0.418441	0.341447	0.398455	-0.0114685	0.222621	0.0788841	0.437423	0.264128	1.06446	0.418383	0.465156	0.773595	-0.25112	0.0660096	-0.21594	0.17793	-0.0365846	0.497609	0.75636	0.769335	-0.215412	0.585323	0.0360252	0.291403	0.545536	0.6553	224	0.288127	-0.248593	0.489818	0.082013	-0.513505	0.40086	-0.329527	0.234525	-0.516107	-0.15569	0.226573	0.207725	-0.0333103	-0.521384	0.760495
225	0.139051	0.120769	0.521428	0.243522	0.439155	0.683041	0.209663	0.801383	0.321485	0.238869	0.595231	-0.276605	0.332629	0.0140234	0.150207	0.548152	0.0266654	0.479986	0.33136	0.173787	-0.140103	0.20593	0.986528	0.19354	0.0960645	0.449832	0.786015	-0.101563	0.959629	0.223488	0.61684	0.708708	0.482947	225	0.00781324	-0.0600106	0.169743	0.0145408	-0.0106015	0.493117	0.533488	0.170701	0.0220121	-0.445221	0.229593	0.30481	-0.0389342	-0.564224	0.133415
226	0.278279	0.145074	0.50015	0.200799	0.333998	0.455036	0.0115423	0.702952	0.46361	0.180299	0.305289	0.193361	0.149309	0.252183	0.234153	0.696975	0.026066	0.158195	0.449272	0.446325	0.361071	0.30214	0.657081	0.0827327	0.394026	0.881593	1.27585	0.0135618	0.535569	0.203645	0.818202	0.616074	0.754176	226	0.114959	-0.148321	0.379624	-0.123713	0.0054377	0.323217	-0.103441	0.439692	-0.249569	0.0709451	0.135055	0.296177	0.18831	-0.466682	0.227228
227	0.870953	0.160994	0.784234	0.563812	0.246424	0.683409	0.438664	0.842651	0.255054	-0.0108288	0.0639382	0.552258	0.112318	0.167569	0.420991	0.588621	0.164708	0.0539208	0.543413	0.393925	0.47137	0.288271	0.681922	0.109687	0.143544	0.71542	2.03224	-0.017752	0.378903	0.0882444	0.431803	0.598384	0.800328	227	0.216055	0.155582	0.237664	0.204873	0.423209	0.453384	-0.304532	0.254007	-0.133844	-0.247966	-0.0093911	0.403372	0.17786	-0.247208	0.473065
228	0.43593	0.488346	0.503015	0.225834	-0.273793	0.654143	0.348487	0.930372	0.651795	0.160208	0.0758965	0.0849781	0.407681	0.202466	-0.357088	0.304462	0.459741	0.346591	0.361422	0.608943	0.515218	0.285985	0.71728	0.0584974	0.274072	1.13371	2.37311	-0.109289	0.522207	0.400257	0.183212	1.0903	0.464458	228	-0.00566738	-0.108126	0.256268	0.251594	0.0862497	0.341645	-0.252854	-0.104853	-0.673163	-0.213192	-0.134451	0.651143	-0.41576	-0.127955	0.412317
229	0.415951	0.28578	0.308063	0.0828442	-0.487895	0.853704	0.14573	0.945442	0.658672	0.221732	-0.129218	0.217525	0.318301	0.391633	-0.296017	0.288413	0.225437	0.588141	-0.144052	0.427796	-0.123477	0.332337	0.764454	0.0365105	-0.159935	0.76878	1.48781	0.130495	0.478257	0.286398	0.2392	1.0508	0.355691	229	0.127444	-0.28903	0.468944	0.373234	0.498741	-0.185251	-0.0821313	0.262577	-0.340075	0.027322	0.218013	0.639406	-0.345624	-0.627698	0.258446
230	0.272558	-0.0205059	1.01295	0.435739	-0.589017	0.538213	0.274166	0.689026	0.0749704	0.229494	0.343235	0.230172	0.30977	0.191199	0.401854	0.663738	0.223557	0.324881	0.608986	0.589886	-0.0528113	0.33431	0.827199	0.126832	0.210003	0.5356	1.31254	0.390095	0.842326	0.599146	0.0705982	0.874379	0.433556	230	0.321875	-0.246829	0.38081	0.0814027	0.618741	0.339474	-0.0803401	0.381565	-0.302927	-0.0221345	-1.25382	0.157742	-0.206357	-0.402232	0.00900805
231	0.545612	0.424204	0.460901	-0.237928	-0.643491	0.248876	-0.301064	0.552047	0.338197	-0.196803	0.220509	0.483809	0.250685	0.284098	0.874601	0.566936	0.358041	0.381557	0.209802	0.799221	0.173909	-0.538555	0.315823	-0.266176	0.226712	0.312236	0.614878	0.254044	0.890064	0.140375	-0.106589	1.05251	0.57023	231	0.187849	-0.250203	0.261114	0.0157892	0.113944	0.271569	0.157158	0.277052	-0.270235	-0.344092	-1.16386	0.0530929	-0.361632	-0.430152	-0.072811
232	0.823261	0.635444	0.952112	0.225789	-0.724079	0.131406	0.027673	0.517034	0.625213	0.00876798	-0.136536	0.183292	0.477493	0.31699	0.230228	-0.262355	0.455538	0.495449	0.376679	0.43723	0.10855	0.449164	0.503703	-0.0589169	0.265116	0.837944	1.53531	-0.0514543	0.547147	-0.040946	0.296885	0.810377	0.403788	232	0.312194	-0.0418627	0.667598	-0.190104	0.361001	0.838934	0.147895	0.216027	-0.0963633	-0.0262667	-0.17329	0.0016693	-0.382148	-0.314478	0.364607
233	0.372107	0.167172	0.635607	0.334127	-0.633855	0.321702	-0.502555	0.765043	0.637732	0.216339	0.548114	0.109019	-0.198928	0.189536	0.294694	0.425505	0.111273	0.666048	0.490994	0.292662	0.152705	0.134465	0.479984	0.151953	0.0709401	0.67989	1.03062	0.323745	0.34839	-0.244063	0.345473	0.570336	0.247409	233	0.222134	-0.581298	0.599284	0.127618	0.50138	0.172437	0.524039	0.485696	-0.181835	-0.14079	0.273909	0.56907	-0.128773	-0.305666	0.403276
234	0.433186	-0.178759	0.674074	0.208097	-0.298983	0.560869	0.310578	0.476488	0.893076	-0.0421667	0.416432	0.402726	0.320901	0.538335	-0.27862	0.55903	0.54653	0.322913	0.118887	0.593208	-0.017034	0.538853	0.553328	-0.201578	-0.234182	0.655224	1.24988	0.215779	0.833741	0.314824	0.26045	0.739119	0.38909	234	0.492947	-0.248437	0.0319442	0.0547248	0.205762	0.200175	0.376986	0.209985	0.114379	-0.284432	0.624045	0.196011	-0.264092	-0.253184	-0.122666
235	0.528374	0.558267	0.843892	0.0230212	0.218144	0.287639	0.757085	0.0433677	0.466624	-0.133971	0.0919057	0.295521	0.433693	0.284017	0.180497	0.864409	0.49825	0.286492	0.560157	0.415164	-0.294985	0.278531	0.506254	0.334436	0.315885	0.772872	0.885008	-0.126744	0.620803	-0.160839	0.295003	0.657705	0.553014	235	0.0744706	0.0178079	0.162678	-0.0616462	0.179651	0.341735	0.373907	0.405652	0.427075	-0.223681	0.621212	-0.0149364	-0.124608	-0.597093	0.296329
236	0.451914	0.251752	0.718924	0.124513	-0.462757	0.304995	0.188169	0.0692524	0.0403579	0.126593	0.322542	0.221406	-0.0736301	0.209277	0.997281	0.638772	0.187261	0.393059	0.0758727	0.662752	0.131943	0.314477	0.61677	0.0914747	-0.141966	0.643393	0.996292	0.224578	0.6928	0.448581	0.336381	0.563169	1.11746	236	0.335973	-0.289225	0.885708	-0.157263	0.297898	0.674948	0.228751	0.815998	0.476762	-0.318983	0.0801027	0.159776	-0.198623	-0.366013	0.0833819
237	0.670876	-0.00969951	0.958726	0.1303	-0.328217	0.218168	-0.158789	0.131659	0.245518	0.087804	0.0891377	0.339322	0.292137	0.227585	0.46571	0.523995	0.219411	0.19848	0.317176	0.080595	-0.09559	0.0720452	0.568441	-0.0964411	0.133658	0.683735	1.08073	0.546475	0.74465	0.252679	0.128597	0.980091	0.968935	237	0.0396385	0.119474	0.65659	-0.138288	0.131181	0.227803	0.0874474	-0.131731	1.12493	-0.321878	0.373005	-0.0256261	-0.18766	-0.437411	0.285016
238	0.455754	0.0325807	0.883096	0.0168527	-0.066423	0.264304	0.155295	0.389391	0.325844	0.198915	0.664162	-0.033313	0.266647	0.097093	0.573092	0.186874	0.29109	0.0367242	0.314811	0.333991	0.270671	0.498725	0.301214	-0.499434	0.0768847	0.866835	0.717642	0.0869661	0.324983	-0.0208	0.0754611	0.874725	0.873555	238	-0.646555	-0.0290303	0.291746	0.35069	0.457416	0.242421	-0.228577	0.32523	1.04474	-0.37783	-1.50586	0.00234593	-0.751758	0.0375565	0.157558
239	0.483667	0.075276	0.499198	0.421615	-0.0317102	0.220206	0.429605	0.451204	0.459739	-0.160615	0.276045	0.0363066	0.168433	0.0677455	0.284893	0.15405	0.449685	0.450216	0.290954	0.183986	0.298491	0.130745	0.593413	0.062837	-0.119621	0.591206	0.961859	0.41346	0.60066	0.071939	0.00740779	0.836551	1.24695	239	0.335078	-0.132357	0.328511	0.497222	0.149598	0.0627389	0.676185	0.0306886	0.479413	-0.333535	0.0471634	0.273571	0.55513	-0.196848	0.0410855
240	0.296134	-0.0850495	0.330117	0.32308	0.175525	0.012353	0.121018	0.775872	0.0295948	-0.0631497	0.39325	0.200087	-0.12311	0.32333	0.389056	0.859922	-0.17811	0.305492	0.229339	0.356578	0.223525	0.0547496	0.656917	0.272375	-0.259197	0.876916	0.52854	-0.0641224	0.4238	-0.0697185	0.248412	0.67217	0.920713	240	0.355615	-0.0929225	0.544351	0.172888	0.297459	0.455143	0.330723	0.420251	0.147122	-0.398178	-0.119694	-0.0610083	0.731157	0.232822	-0.425414
241	0.135325	0.161123	0.514429	0.53562	0.164094	0.17377	0.139164	0.452437	-0.409572	-0.246464	0.0324456	0.0518398	0.51913	0.473105	0.171814	0.581417	0.0665232	0.981659	0.243642	0.196411	-0.0509999	-0.649959	0.571989	-0.161435	0.029002	0.678048	0.786493	0.375605	0.650012	-0.28296	0.171904	0.738729	0.99942	241	0.234159	-0.13512	1.18158	0.20828	0.730127	0.283795	0.456454	-0.386481	0.282761	-0.341372	0.463846	-0.235783	0.526187	-0.011021	-0.283287
242	0.496541	0.0109478	0.637753	0.532317	-0.548035	0.0819913	0.437419	0.686226	-0.274482	0.104476	0.373931	0.597885	0.46047	0.0578938	0.51261	0.426645	0.546896	0.485367	0.230312	0.174983	0.332077	0.573807	0.745313	-0.128533	0.00155736	1.08848	0.894577	0.24368	0.321831	0.00571972	0.172762	0.9702	0.592292	242	-0.060171	-0.202114	0.901948	0.249669	0.0230029	0.256696	-0.165561	0.549	0.136111	-0.287473	0.125682	0.0954576	0.345999	-0.497692	-0.175837
243	0.267695	0.064997	0.50973	0.11203	-0.223675	0.381057	-0.521826	0.821068	0.182116	-0.232443	0.538696	0.464097	0.592656	0.358916	-0.325833	0.369392	0.29114	-0.00658701	0.523088	0.413252	0.107036	0.538142	0.762289	0.108306	-0.473791	0.783854	0.52721	-0.411434	0.452065	-0.183995	0.31378	0.725272	0.662715	243	-0.217913	-0.289036	0.910381	-0.0296173	-0.254281	0.139978	0.342883	0.594	0.161596	-0.132542	-0.317864	0.477487	0.223224	-0.11145	0.099762
244	0.339107	0.232772	0.59229	-0.510537	-0.658354	0.14977	-0.192871	0.607383	-0.28411	0.0754237	0.633366	0.284945	-0.290121	0.335083	0.275265	0.387542	0.495426	0.237609	-0.118922	0.541204	0.179228	0.492139	0.807431	0.258132	-0.341575	0.609684	0.697859	0.383491	0.428799	-0.0216199	0.167678	0.72099	0.371657	244	-0.0679243	0.0790034	0.612134	0.144218	-0.166253	-0.0947168	0.481028	-0.367878	0.085467	-0.207296	0.0921577	0.465341	0.244795	-0.0409173	-0.0149327
245	0.33261	0.146361	0.309365	-1.21977	-0.22048	0.378245	0.67551	0.934517	-0.206464	-0.0468909	0.345059	0.0608931	0.850826	0.0959105	0.29965	0.0484382	0.572315	0.370432	0.134381	0.946435	0.0650985	0.200605	1.08443	0.356825	-0.381856	0.427457	1.18844	0.272905	0.390483	0.106232	0.234423	0.621243	0.332524	245	-0.464079	-0.160599	0.449175	0.0574744	0.0762433	0.348246	0.082357	-0.0253475	0.0684269	-0.377146	-0.0319936	0.156846	-0.0513484	0.537247	-0.0901383
246	0.399447	-0.14797	0.358112	-0.844093	-0.374406	0.291737	0.171007	0.783654	-0.706187	-0.115628	0.862561	0.457592	0.33083	0.354958	0.207235	-0.155751	0.640713	0.685543	0.0312622	-0.302802	-0.47328	0.322592	0.383322	-0.153572	0.295047	0.535714	0.557962	0.998543	0.149122	-0.0937676	0.362364	0.593628	0.453558	246	0.240066	-0.220335	0.430017	0.0348077	0.15443	-0.191856	0.218715	0.632633	0.0287908	-0.342634	-0.279515	0.293165	-0.038429	0.244377	0.0130094
247	0.272326	0.330263	0.669519	-0.849835	-0.225438	0.27393	-0.404172	0.921672	-0.424344	0.437077	0.252941	0.378269	-0.0758192	0.111137	0.380895	0.304875	0.369372	0.554128	0.37623	0.532189	-0.58566	0.240753	1.1011	0.216042	0.271339	0.738868	0.585225	0.794036	0.0499219	-0.0721973	0.302419	0.593075	0.283229	247	0.11132	-0.228493	0.164359	-0.20558	0.0417708	0.11226	0.14091	-0.0222608	0.340029	-0.600794	0.0389606	0.576419	0.0521204	-0.0977544	-0.018624
248	0.497127	1.03101	0.7351	-0.0865965	0.338045	0.144599	0.173925	0.742126	-0.299485	-0.00439308	0.577018	0.324337	0.523442	-0.177498	0.173592	-0.0438629	0.500174	0.236045	0.357531	-0.396968	-0.0224268	0.326197	0.558533	0.0996452	-0.180165	0.746554	0.877331	1.01819	0.0431147	0.0426959	0.254394	0.220905	0.360633	248	0.0560695	0.274326	0.444722	-0.137972	0.263597	-0.326105	0.174107	0.408219	0.156629	-0.399719	-0.0378284	0.33693	-0.0708723	0.236531	-0.328285
249	0.331443	1.22207	0.591446	-0.785565	0.0995613	0.785148	0.144601	0.874542	-0.345198	0.0349417	0.661865	0.23932	0.5992	0.438838	0.272673	0.483443	0.652288	0.305269	0.762449	0.402539	0.169199	0.444903	0.719753	-0.397846	-0.00626695	0.33994	0.329822	0.498597	0.666208	0.0296014	0.154624	0.510016	0.442994	249	0.0607595	-0.18751	0.358182	0.250022	0.523708	0.111001	-0.37076	0.00228073	0.277799	-0.447331	0.397458	0.508301	0.0909374	0.279483	0.147065
250	-0.181268	0.543741	0.76	-0.214318	-0.199555	0.939571	0.10687	0.616983	0.156121	0.0152891	-0.042916	0.376137	0.373949	0.171713	0.11409	0.333838	0.423933	0.08324	0.580532	-0.63222	0.314637	0.212995	0.55983	-0.241287	0.218936	0.748214	0.899559	0.686303	0.333313	0.113268	0.629844	0.39019	0.360434	250	-0.0483102	-0.108406	0.254224	-0.0895352	0.510988	0.174419	0.155945	0.240792	-0.277389	-0.0721366	0.586977	0.235635	0.834808	0.278284	0.227687
251	0.267868	0.286835	0.246352	0.0679776	-0.51283	0.39307	-0.348451	0.424022	0.334702	0.0388337	0.238456	0.203128	0.176658	0.123392	-0.341382	0.669942	0.317646	0.206398	0.438899	0.60188	-0.0301339	0.0548709	0.372645	-0.382786	-0.127045	0.592341	0.981126	0.504342	0.203025	-0.346867	1.03606	0.40575	0.607194	251	0.153472	-0.575515	0.606357	0.0474605	0.501503	0.45651	0.102804	0.013194	0.204215	-0.395395	0.0259236	0.598996	0.30821	0.261874	0.165194
252	0.390202	0.228508	0.290824	-0.0635136	-0.125224	0.549308	0.033877	0.383749	0.23332	0.234677	0.343821	0.323886	0.432309	0.0776225	0.263578	0.455027	0.450001	0.0283968	0.667051	0.61111	0.232408	0.208621	0.443481	-0.12945	-0.0903685	0.556588	0.192073	0.0110884	0.476947	-0.00270759	0.964812	0.521467	0.397325	252	0.318405	-0.100744	0.547713	1.16507	0.800912	0.787448	0.166223	0.0160201	0.7772	-0.434745	0.719114	0.203776	1.40262	0.216397	0.278617
253	0.402767	0.259891	0.565301	0.0454618	-0.0855564	0.592746	-0.207879	0.607618	0.314071	0.35937	-0.024399	0.102282	0.27676	0.155846	0.352058	0.688316	0.243738	0.0755426	0.564464	0.149262	0.229447	0.50246	0.167423	0.000989757	-0.0920602	0.249738	0.262015	0.804692	0.171943	0.249223	0.571125	0.506803	0.517825	253	0.484655	0.0926328	0.127426	0.666531	0.74366	0.113601	0.0845516	0.704512	1.09905	-0.502382	0.28831	0.245113	0.725089	0.183065	-0.0302346
254	0.200726	0.159427	0.414421	-0.127206	-0.252465	0.681257	0.114723	0.623383	0.159084	0.154097	-0.181866	0.214285	0.0745985	0.289427	0.258735	0.466166	0.0505492	-0.164516	0.170519	0.430685	0.160858	0.329324	0.857158	-0.080144	0.112332	0.153965	1.34514	1.57045	0.427086	-0.320239	0.63115	0.304912	0.548163	254	0.110545	-0.312171	0.13671	0.221963	0.983326	0.47215	0.411482	0.185615	0.637295	-0.391479	0.518466	0.636499	0.356055	0.163602	0.132743
255	0.0980231	0.590874	0.189787	0.181992	-0.0776507	0.189923	-0.309844	0.486365	-0.184329	0.112038	0.422417	0.188608	0.605858	0.264379	-0.0218968	0.291063	0.306342	0.271658	-0.67199	0.369551	0.090452	0.175255	0.291127	-0.151606	0.166706	0.637687	0.97539	0.878071	0.588404	-0.424252	0.251789	0.406866	0.35804	255	-0.118949	-0.328539	0.341287	0.524816	1.74855	-0.147304	-0.0328988	0.345352	0.66172	-0.332468	0.275745	0.430509	0.378887	-0.294991	0.145903
256	0.376816	0.342831	0.447411	0.794336	0.144521	0.453162	-0.446218	0.59913	0.0420136	0.120658	0.524384	0.0152482	0.526804	0.286683	-0.238532	0.555603	-0.33161	0.0330679	-0.565007	0.467305	-0.220839	-0.399362	0.286504	0.0941186	0.0724682	0.181152	1.13124	0.518578	0.321439	0.336918	0.375049	0.461348	0.455387	256	0.144732	-0.269895	0.287489	0.141825	0.699927	0.272356	-0.0246645	-0.0391567	0.596497	-0.43747	0.181026	0.785678	0.176091	-0.0347624	-0.377897
257	0.684922	0.0521952	0.473407	0.1094	0.0671241	0.766278	-0.537304	0.80232	0.733756	0.120321	0.443301	0.64189	-0.283231	0.285257	0.234451	0.0428173	0.498233	0.00494055	0.219615	0.033541	0.0673194	0.255925	0.479232	-0.0507778	-0.356677	0.237164	1.06527	0.659183	0.416211	0.6632	0.477821	0.204687	0.166089	257	-0.171883	0.0235783	0.397574	-0.229904	0.182346	0.22562	0.67746	0.251895	0.573759	-0.0689595	0.686554	0.71356	0.273879	0.850327	0.326446
258	0.280457	0.204589	0.451076	0.104426	0.000230415	0.734447	-0.0553882	0.5351	0.226918	0.139291	0.456292	0.229649	0.474067	0.394061	0.285127	0.15436	0.446157	0.180906	0.312487	-0.0574328	0.418023	0.678104	0.0937809	0.144649	-0.0995143	0.55442	0.920877	0.42142	0.0409542	0.341126	0.326283	0.430352	0.314551	258	0.167098	0.168506	0.414258	-0.27078	0.517164	-0.118335	0.417954	-0.0810246	0.594988	-0.306535	0.260092	0.378657	-0.0512861	0.364118	-0.0145336
259	0.449099	0.555749	0.353453	0.696518	0.0289834	0.137382	-0.0151592	0.358653	0.088409	-0.372109	0.350002	0.460378	0.400412	0.0154158	0.122056	0.0166865	0.428329	0.259236	-0.573867	-0.548718	0.0639473	0.26746	-0.226572	-0.00928463	-0.314481	0.460525	0.666713	0.866914	0.542471	-0.120725	0.423176	0.244057	0.297	259	-0.103747	0.046464	0.36011	-0.377438	0.363681	0.546802	-0.0064566	-0.0910975	0.545027	-0.205812	-0.432556	0.863752	0.269849	0.518091	0.0674314
260	0.32896	0.166603	0.3935	0.0405631	0.00220482	-0.231831	-0.315691	0.306991	0.392659	-0.161077	0.231439	0.54113	0.10335	0.29915	0.313231	0.0193521	0.188993	0.131549	0.598026	0.608455	0.321532	-0.273128	-0.168323	-0.312034	-0.31101	0.099148	1.24438	0.373563	0.369705	-0.0075811	0.460512	0.385161	0.523809	260	0.290483	-0.615406	0.365574	0.261822	0.697196	0.358217	-0.230167	-0.0736014	0.687867	-0.230509	0.259615	0.817438	0.195529	0.218035	0.14696
261	0.28067	0.32813	0.489543	0.151461	0.124048	0.234374	0.110692	0.773566	-0.0571466	0.0405467	0.209221	0.230766	0.168358	0.387627	0.283646	0.226472	0.561584	0.0144979	0.15714	0.527367	-0.370464	0.337544	0.322619	-0.154778	-0.244483	0.113216	1.00073	0.326499	0.316344	-0.0151111	0.173445	0.323837	0.419676	261	-0.044829	-0.00299184	0.234833	-0.15562	1.03914	0.0991327	-0.50129	-0.483433	0.551588	-0.689404	-0.00149402	0.263556	-0.0622449	0.0928746	0.137678
262	-0.0681381	0.312727	0.530391	0.18157	0.078486	0.439764	0.398571	0.547037	-0.1231	0.347608	-0.00801072	0.165967	0.479249	-0.21099	0.242825	0.302835	0.355846	-0.265509	0.399589	0.359586	0.244567	0.345967	0.747059	-0.125091	-0.158068	0.260975	1.29064	0.0592277	0.765828	-0.100846	0.333989	0.0960075	0.107863	262	-0.257349	-0.0433215	0.139519	0.00763934	0.432559	0.152302	0.0716882	0.662001	0.859846	-0.798419	-0.180364	0.241213	0.432823	0.486394	1.53851
263	-0.343853	-0.0361311	0.505216	0.235099	0.0245705	0.563298	0.362232	0.487867	-0.322157	-0.0729264	0.473693	0.172441	0.0917472	-0.020988	0.22584	0.278741	0.309238	0.174482	0.124038	-0.357201	-0.16865	0.190419	0.0111456	-0.28842	-0.282659	0.339666	1.13601	0.0364102	0.3293	0.0567573	0.216541	0.127057	-0.00335682	263	-0.044918	-0.365025	0.172573	-0.0650325	0.330797	0.269405	0.158509	-0.161635	0.585105	-0.492571	0.367789	0.372121	0.675241	-1.51574	0.788896
264	0.431443	0.292674	0.62243	0.0897957	0.122428	0.0960116	0.194966	0.27225	-0.675985	-0.473659	-0.132916	0.470023	-0.223418	-0.103536	0.0626656	-0.166151	0.452818	-0.23465	0.229109	0.351497	-0.131955	0.52496	0.267585	0.733649	0.0213297	0.410078	0.540695	-0.0175236	0.40146	-0.0411766	0.214692	0.272743	-0.0209953	264	0.0835233	-0.526635	0.0528116	-0.216783	1.1754	0.193177	-0.300183	-0.00801843	0.561296	-0.654874	0.456593	0.541768	0.229164	-0.627896	0.444179
265	0.471615	0.24597	0.57621	0.16702	-0.164809	0.196168	0.422631	0.451184	-0.561322	0.190647	0.446512	0.357657	0.344562	-0.0268165	0.181649	0.345299	0.660319	0.137792	-0.318569	0.830678	0.0805318	-0.130912	0.190947	0.0952554	0.111119	1.1004	0.796577	0.106883	0.555253	-0.143227	0.131346	0.179863	0.047462	265	0.294021	-0.0211439	0.0693207	-0.640022	1.10098	0.338814	-0.450248	0.391447	0.90158	-0.496996	0.403208	0.306676	0.206105	-0.437922	0.386597
266	0.227762	0.431804	0.52645	-0.184535	-0.42114	0.721076	0.0490759	0.75794	0.173944	-0.177217	0.375975	0.115973	0.0643531	-0.112448	0.0930916	-0.0498189	0.291368	-0.0836938	0.284334	0.880205	0.195949	-0.0901562	0.499428	-0.273567	-0.116563	0.820525	0.344943	-0.0450293	0.144637	0.418668	0.455131	0.310841	-0.106946	266	0.220233	-0.292205	0.552136	-0.427886	0.88645	0.0834299	-0.114381	0.204702	0.447621	-0.629209	-0.154746	0.207352	0.166199	-0.278591	0.606276
267	-0.104313	0.0443172	0.879063	0.397609	-0.559267	0.459707	0.441317	0.329894	-0.0225217	0.040768	-0.122677	0.187436	-0.207923	-0.0518166	0.495201	0.819899	0.168195	0.571605	0.394841	0.305512	-0.0113205	-0.125685	0.770442	-0.0165445	0.134794	0.632845	0.350477	-0.0113569	0.269102	0.0268684	0.324879	0.534403	0.115839	267	0.105955	-0.0967906	-0.0778931	-0.083214	0.600786	0.199463	-0.0266477	0.462415	0.17464	-0.096043	0.266593	1.02374	0.273792	-0.271617	0.662011
268	-0.281293	0.414013	0.257575	-0.00883517	-0.610422	0.133883	0.215226	0.848872	-0.138942	-0.124066	-0.0930128	-0.140242	0.274303	0.0870816	0.0915514	0.908029	0.308643	0.627417	0.388804	0.201103	-0.00172371	0.030442	0.825675	0.0155472	-0.23921	0.627102	0.927415	-0.004347	0.747526	-0.0375136	0.0424625	0.288058	-0.131542	268	0.350703	-0.151924	0.0145548	-0.246515	0.650482	0.679187	-0.304065	0.270558	0.230282	-0.305457	0.0406895	1.20906	0.508036	-0.0671857	0.730698
269	0.118084	0.24773	0.284161	0.513189	-0.623193	0.390619	0.079235	0.798418	-0.0527024	-0.130563	0.24065	0.113374	0.478623	0.241156	0.105704	0.394484	0.509739	0.0674748	-0.103314	0.25968	0.29446	-0.155799	0.420876	-0.287792	0.150032	0.639352	1.00017	0.243809	0.244009	0.252887	0.0751526	0.366578	0.0323268	269	-0.412835	0.102439	0.280512	-0.238249	0.350483	0.262565	-0.671324	-0.00420868	-0.0535697	-0.444296	-0.435043	0.942925	0.614933	-0.315065	0.160936
270	0.109802	0.260142	0.381025	0.701462	-0.423929	0.335069	0.319772	0.523224	0.224129	0.239706	0.103234	0.164453	-0.0513539	0.0714091	0.158284	0.416662	0.299257	0.449074	0.374798	0.395259	-0.0110363	-0.0958095	0.167239	0.233476	-0.0882765	0.77144	0.479797	0.152489	0.547759	-0.313996	-0.0397746	0.208962	0.202292	270	0.259007	-0.154516	0.173934	-0.0785518	0.699794	-0.512737	0.130401	-0.210091	0.330907	-0.576253	0.173294	0.876238	0.0268126	-0.533709	0.381742
271	0.0460427	-0.182308	0.421979	0.408666	-0.579394	0.0859565	0.0899064	0.387693	0.453862	0.0325401	0.12792	0.50393	0.638292	-0.439706	0.269487	-0.000617213	0.251438	0.416722	0.442253	0.326888	-0.467624	0.00200981	-0.237378	-0.0444348	0.0244333	0.514208	1.13871	0.305018	0.425103	-0.228302	0.176746	0.156941	-0.0757801	271	-0.158582	0.17918	0.246802	-0.358878	0.336996	0.676271	-0.529127	0.0459747	0.181411	-0.762265	0.209356	1.23354	0.200796	-0.0448598	0.388634
272	-0.231398	0.222009	-0.166666	0.41367	-0.535928	0.275573	-0.215343	0.334136	0.0779796	-0.041304	0.160494	0.716766	0.33638	0.0573316	0.368447	0.311794	0.360109	0.341279	0.568567	0.28153	0.0426205	0.502399	0.100083	-0.643175	0.233747	0.881527	0.454331	0.352657	0.450136	-0.259396	0.32168	0.370935	0.0344944	272	-0.037585	-0.0606351	0.448891	-0.0720657	0.50027	-0.0981805	0.151428	0.303441	0.185129	-0.374587	0.501339	1.08043	1.11391	-0.0854592	0.393628
273	-0.271381	0.0347832	0.451492	-0.167485	-0.455609	0.503669	0.0901013	0.0512819	0.412313	-0.302256	0.0519709	0.146571	0.344744	-0.0392381	-0.0789943	0.433214	0.577555	-0.0509345	0.33288	0.395494	0.132684	0.841732	0.0535544	-0.279351	0.0600007	0.608543	0.137447	0.274288	0.612499	-0.278663	0.0874669	0.314751	-0.523816	273	0.125871	-0.064456	0.638429	-0.144738	0.131473	0.451947	-0.554685	0.115054	0.331016	0.120284	0.252914	0.650009	0.506633	-0.278045	0.673132
274	0.063932	-0.109913	0.364403	-0.243349	0.137502	0.390486	-0.268316	0.428411	0.190801	-0.178774	-0.0952263	0.291313	0.21778	0.0580659	0.189295	0.470506	-0.104763	0.28959	-0.0619756	0.592218	0.262743	0.511136	-0.00215557	0.698053	-0.0209786	0.729826	-0.265171	0.383286	0.104739	-0.0953269	0.79052	0.147559	0.249979	274	0.0557022	0.0218212	0.270354	-0.38548	0.0010415	-0.0764522	-0.120689	0.152533	0.39634	-0.0650593	-1.1232	0.615465	-0.379854	-0.210717	0.342793
275	-0.278957	0.219806	0.566558	0.22483	-0.134135	0.683951	0.0877273	0.313935	-0.176906	-0.275894	0.0885777	0.50423	-0.0643045	-0.197407	-0.0486747	0.514953	0.258538	0.502954	0.19682	0.184588	0.000841294	0.185357	-0.386929	0.113857	-0.233474	0.788969	0.0302051	-0.00666266	0.530364	-0.548025	0.429591	0.547769	-0.209686	275	0.500897	-0.0401337	0.329188	-0.253529	0.531783	-0.0195488	-0.0870838	0.0557031	0.274165	-0.460027	0.0756118	0.855238	-1.15115	-0.42532	0.460594
276	-0.147093	0.125715	0.401121	-0.727072	-0.32573	0.125171	0.0808087	0.59087	0.18372	-0.0733323	0.085909	0.457114	-0.148434	0.275871	-0.0972344	0.482593	0.518107	0.553016	0.120865	0.556876	0.405634	-0.293711	-0.136197	-0.061429	0.424707	0.53095	0.763467	0.0988014	0.503121	-0.631585	0.52373	0.324571	0.325697	276	-0.00765431	-0.266215	0.842628	-0.300601	0.736016	0.186282	-0.0222993	0.299951	0.450456	-0.689043	-0.297322	0.914446	-0.340407	-0.0718235	0.486574
277	-0.0494171	-0.0959259	0.26008	0.137437	-0.0801991	0.413313	0.397422	0.253448	0.249691	0.0366833	0.110298	0.203611	0.509831	0.172435	0.123182	0.240726	0.394046	0.699344	0.192449	0.00701971	-0.0216542	-0.0613731	-0.314702	-0.430754	-0.254716	0.168684	0.315855	0.197788	0.591769	-0.322765	0.531336	0.548316	-0.147963	277	0.0972046	-0.052884	0.745851	-0.984861	1.06326	0.126199	-0.087827	0.328549	0.328903	-0.0160912	0.195502	0.814821	-0.199206	-0.382063	0.124898
278	-0.256413	-0.357731	0.230544	-0.56888	-0.182205	0.672921	0.0587627	0.776715	0.0422966	-0.0254545	0.0791148	0.377217	-0.242773	0.0125015	0.172751	0.46627	0.258189	0.473773	0.0787045	0.02813	-0.0141027	0.294525	-0.115169	0.249773	-0.106832	0.862334	0.272054	0.303876	0.0779956	-0.218647	0.0914562	0.649813	0.248495	278	0.0139679	0.0314085	1.17698	-0.466367	-0.0831595	0.611949	-0.223037	0.170896	0.293019	-0.481853	-0.0192014	0.788015	-0.457502	0.0829582	-0.992271
279	-0.0802673	-0.0992907	0.156621	0.390186	0.120628	0.448301	-0.134224	0.76319	0.236729	-0.122276	0.309238	0.37796	0.210768	-0.022011	-0.256217	0.184652	0.166992	0.8444	0.104785	0.212263	-0.0705377	-0.0948115	-0.00782753	0.197698	-0.0291961	0.577778	-0.127884	-0.0846913	-0.0894865	-0.423763	0.269838	0.472223	0.267945	279	-0.222431	-0.475025	0.773303	-0.53021	0.00933916	0.601822	0.137954	0.0191423	0.155392	-0.0879031	0.289653	0.535527	-0.374496	-0.376964	-0.802947
280	-0.0677233	0.518385	0.6721	0.584074	0.116228	0.0899785	-0.00683953	0.660885	-0.0455881	-0.0356816	0.280143	0.0652596	0.372892	-0.399061	-0.111961	0.334905	0.490066	0.20522	0.0949524	0.50546	0.111102	0.188195	-0.405815	-0.0749565	-0.171926	0.575933	-0.0631331	0.280884	0.482922	-0.134683	0.200943	0.75725	0.120898	280	-0.0181829	-0.125509	0.582099	0.172374	0.638492	-0.112199	0.255721	0.148855	0.419843	-0.386287	0.284344	0.543946	-0.492858	0.140485	-0.344543
281	-0.343197	0.145449	0.114508	0.0297017	0.21141	0.126018	0.170839	0.73272	0.231852	0.204778	0.0769186	-0.193589	0.124262	-0.0742191	0.481478	0.167757	0.579692	0.520418	0.316225	0.390215	0.18288	0.85442	0.339974	0.142501	-0.294026	0.85302	-0.149593	0.100507	0.500659	-0.439078	0.272248	0.711849	0.128318	281	0.321839	0.150362	0.571912	-0.443539	0.615638	0.399866	0.134453	0.0559187	0.478888	-0.295947	0.34364	0.0784708	-0.594982	0.19267	-0.332777
282	-0.475776	0.281507	0.15169	0.325102	-0.200906	0.471257	0.780291	0.529842	0.131284	-0.210849	-0.214909	0.301296	-0.294414	-0.277327	-0.192675	0.890773	0.371756	0.272004	-0.398187	0.35169	-0.0364385	0.164017	0.655629	-0.525981	-0.266148	0.723885	0.246588	-0.0058459	-0.235485	-0.441246	0.280834	0.660522	0.097432	282	0.259975	-0.33908	0.741434	0.0434925	0.198288	0.397747	0.0548407	-0.0372067	0.0261127	-0.334602	-0.359187	0.562984	-0.569823	-0.0431743	-1.04892
283	-0.429304	0.327814	0.381948	0.134521	-0.11998	0.679121	0.0402578	0.797872	-0.0479368	-0.115	0.139552	-0.142899	0.252682	-0.181162	0.259364	-0.180219	0.336427	0.0291321	0.0691948	0.863467	0.168247	0.0526246	0.688698	0.127397	0.0949912	0.67139	0.391641	0.356103	0.103597	-0.2885	-0.0352554	0.452083	0.150248	283	0.291657	-0.162455	0.267844	-0.537771	-0.582779	0.78037	-0.0824869	0.179231	0.442507	-0.420002	0.696652	0.450208	-0.488513	-0.139036	-0.80259
284	-0.0197741	0.244039	0.44717	0.547691	0.0774113	0.667541	0.191347	0.254521	0.479716	0.135593	0.106147	0.40231	0.390181	0.302811	-0.0256272	0.125009	0.664582	0.376311	0.0118954	0.441515	0.142526	0.563265	0.188975	-0.323614	-0.200127	0.211462	0.258636	0.118437	0.265942	-0.0288931	0.634895	0.673724	0.226634	284	-0.942956	-0.0502793	0.51946	-0.899433	-0.0614963	0.433233	-0.0595727	0.442141	0.409995	-0.282457	-0.102244	0.478245	-0.0711615	0.628486	-0.569563
285	-0.644201	-0.0210656	-0.103386	-0.0826164	-0.205246	0.42832	0.0713008	0.543816	0.0575748	-0.323001	0.271072	0.273263	0.181065	-0.208289	-0.256318	0.194382	0.569876	0.185833	0.132148	0.525519	-0.278152	0.231549	0.136614	-0.346223	-0.14736	0.511289	-0.722828	0.497475	0.0821081	-0.00844515	0.27807	0.405289	0.283645	285	0.27464	0.097878	0.694177	-0.0639143	0.143883	-0.166747	0.181357	0.0216694	0.404489	-0.0817584	0.195655	0.463814	-0.160111	-0.0447358	-0.949746
286	-0.696142	0.118044	0.25441	0.120247	-0.346524	0.328801	-0.365733	0.739134	-0.0233948	0.179536	0.221745	0.143608	0.507335	-0.11378	0.486112	0.528335	0.421545	0.255233	0.474899	0.390856	-0.156229	0.179065	0.214781	-0.203336	-0.13513	0.328799	-0.122961	0.19645	0.205434	-0.11565	0.315928	0.434135	0.320464	286	0.193151	-0.0834629	0.570639	0.0374582	-0.153802	-0.106532	-0.0636767	-0.252804	0.1753	-0.205495	-1.54567	0.535655	-0.0566052	0.408447	-0.598312
287	-0.581051	-0.205076	-0.125465	0.0184388	-0.348441	0.0959471	-0.174554	0.6201	0.0911031	0.100692	0.15754	0.350596	0.568929	0.0881475	-0.593552	-0.228224	0.512085	0.0308043	-0.207265	0.460199	0.0650201	-0.881526	0.408487	-0.226447	0.0993331	0.508829	0.239904	0.623745	0.165297	0.127981	0.482095	0.717523	0.192601	287	0.236926	-0.00622103	0.24371	1.18823	-0.0238714	0.519619	0.126285	0.504754	0.341482	-0.46018	-0.265804	0.0520715	-0.190728	-0.244311	-0.409217
288	-0.671997	0.211115	0.0244665	0.514017	-0.112197	0.237174	-0.784844	1.05405	0.00130187	-0.0615374	0.161353	0.436497	0.0656384	-0.197344	0.103813	0.17966	0.204336	0.407869	0.570502	-0.183751	0.258965	-0.140273	0.587531	-0.085928	-0.191667	0.72418	-0.101421	1.27326	0.548599	-0.210683	0.0521523	0.50578	0.614356	288	-0.822223	0.265031	-0.15918	0.868409	-0.15637	0.350113	-0.198915	0.0831761	-0.0273491	-0.332157	-0.0709168	0.399351	-0.123157	0.141099	0.0131637
289	-0.436141	0.752551	0.643089	-0.10595	0.0657766	-0.0600249	-0.337289	1.27812	0.0370269	-0.0869919	0.259591	0.255823	0.205267	0.0663224	0.387907	0.123283	0.32709	0.217437	0.17491	0.181968	0.535656	-0.181094	0.563717	-0.0208025	0.470853	1.02797	0.138865	0.786407	0.215722	-0.150227	0.482517	0.528302	0.443343	289	0.3159	-0.169907	0.614688	0.125116	0.122301	-0.212131	-0.242465	0.568983	0.361338	-0.354079	0.171562	0.35254	-0.0103904	0.0922953	-0.632293
290	-0.28347	0.557126	0.230582	-1.62336	-0.345942	0.0167659	0.0706022	0.78621	0.126464	0.1444	0.355522	0.173769	0.099545	0.0292273	0.438526	0.447147	0.418106	0.0842232	0.520064	-0.0740797	0.107155	-0.548492	0.32515	-0.238976	0.159484	0.714693	0.0844363	0.686494	0.000809384	-0.162808	0.265174	0.278932	0.365415	290	0.0698832	-0.320805	0.264883	0.326189	0.155146	0.179293	0.0398882	0.0671128	0.320451	-0.55245	-1.76904	0.493494	0.156202	0.0579671	-0.32314
291	0.122388	0.528211	0.394249	-0.501889	0.174971	-0.331062	0.0602824	0.96757	-0.615396	0.321567	0.105393	0.15087	-0.166216	0.0975155	0.635706	0.0635762	0.237219	0.0419387	0.0991712	-0.2319	-0.221532	0.432535	0.211925	-0.0083426	-0.314418	0.446495	0.305147	0.468976	0.3404	-0.280566	0.627538	0.270631	0.392197	291	0.212905	-0.157467	0.0991738	-0.181107	0.197473	0.415556	-0.2769	-0.344535	0.379409	-0.370889	0.240464	0.599181	-0.0713336	-0.18498	-0.139303
292	0.126465	0.784139	0.227611	0.504687	0.233454	0.0690449	0.278313	0.643389	0.0852627	-0.0432493	0.332109	-0.191234	-0.100703	-0.15741	0.0905236	0.353564	0.272024	0.152553	-0.177853	-0.118005	-0.140925	-0.0673569	-0.35491	0.136265	-0.34821	0.371503	0.655503	0.87854	0.0751016	-0.489544	0.625165	0.455284	0.598403	292	0.21964	-0.0255654	0.572036	0.0426229	0.340076	0.751444	0.0867202	0.258912	0.397755	-0.0793913	-0.0553609	0.40218	0.142106	0.271754	-0.212913
293	-0.522079	0.682099	0.353021	0.795641	-0.169165	0.134585	0.0626372	0.537658	-0.286544	0.0743971	0.323359	0.101384	-0.0349836	0.0400664	0.461667	0.202543	-0.0606941	0.606158	0.0604539	0.352606	-0.217874	-0.121618	-0.996663	-0.00848704	-0.269027	0.40409	0.682221	0.407254	0.228428	-0.411283	-0.0257755	0.246956	0.513391	293	0.273602	0.0566092	0.359637	0.106447	-0.0049269	0.350026	0.245982	0.036894	0.206804	-0.21799	-0.237548	0.299235	0.935846	-0.0304227	-0.152206
294	0.0877496	0.317611	0.181201	0.151109	0.24342	0.0684833	0.302708	0.557402	0.0925492	-0.0601438	0.216802	-0.250794	0.50219	0.151301	-0.0328795	-0.0682506	-0.298194	0.447825	-0.11085	0.0317877	-0.194117	-0.656077	-0.137799	-0.0576986	-0.290144	0.304864	0.0513919	0.215157	0.17124	0.227898	0.260934	0.26395	0.37138	294	0.218172	-0.152796	0.123817	-0.0290185	-0.910625	0.524124	0.195561	-0.0202887	0.0681007	-0.116613	0.240795	0.57988	0.331857	0.0771428	0.0333435
295	-0.288365	0.590871	0.345942	0.240736	-0.00612839	0.143426	0.387146	0.7212	-0.0989084	0.0595489	-0.0859365	0.215129	-0.240616	-0.190429	0.224489	-0.261202	-0.264634	0.642312	0.327398	-0.138228	-0.673768	0.148584	0.120541	-0.502964	-0.0187589	0.203295	0.419739	0.337599	0.278475	-0.350029	0.457736	0.393917	0.156347	295	0.30253	0.0430288	0.533816	-0.0976633	0.174004	0.193397	0.220936	0.408934	0.353753	-0.291401	0.293426	0.476288	0.396602	0.359814	-0.260439
296	-0.282041	0.387205	0.136349	0.100215	0.409596	-0.0933927	-0.285909	0.623125	0.0516929	-0.347062	0.0609943	0.147578	0.338406	0.0323263	0.350991	-0.0460515	0.196758	-0.0842775	0.0183869	0.269482	0.401726	0.273382	-0.0442797	-0.316009	-0.0164933	0.193533	-0.00306278	0.347529	0.735754	-0.224488	0.424049	0.379284	0.416618	296	0.0118803	-0.757804	0.632594	-0.285391	-0.0560515	0.638415	-0.0020036	0.106683	0.065598	-0.454028	0.277852	-0.185402	0.524869	0.0815015	-0.0269626
297	0.0834682	0.41178	0.15948	0.068625	0.45653	-0.317417	0.351352	0.267159	0.0373578	-0.441104	0.056287	-0.0992889	0.180844	-0.125526	0.145124	-0.0844445	-0.0555541	0.327404	0.0251548	-0.238164	0.417638	0.0806653	-0.0856531	-0.243894	-0.269105	0.821125	-0.184911	0.276598	0.0599848	0.137709	0.427412	0.0655693	0.445278	297	0.0634736	0.011649	0.0126921	-0.440151	0.142722	0.220318	-0.116816	-0.0455524	0.117967	-0.49818	0.133384	0.0877843	0.201486	1.28009	0.204236
298	0.0489623	0.181484	0.320597	0.159456	0.583246	0.195569	0.26192	0.787414	-0.271594	-0.0174542	0.219127	0.160942	0.104119	-0.0675374	-0.0737224	0.292231	0.180172	0.0128166	-0.108404	0.396395	0.18075	0.339752	0.461369	-0.0206518	-0.22367	0.311799	0.316546	0.585379	0.175193	0.411152	0.438962	0.352379	0.148775	298	-2.2109	0.0750984	-0.00882278	-0.329862	0.0689556	0.643306	0.0489468	-0.0405256	0.543461	-0.230837	0.160319	0.211406	0.0985148	0.941039	0.0452299
299	-0.102135	0.0275931	0.302817	0.0259373	-0.164325	0.226387	0.219504	0.848631	0.33272	-0.0109105	0.358044	0.19655	0.376174	-0.125475	0.085954	0.240257	-0.0282901	0.176357	0.000864461	0.20674	-0.187213	-0.0379657	0.0872063	-0.290807	0.198778	0.526363	0.314495	0.646494	0.139907	0.371866	0.144603	0.235507	0.222027	299	0.101296	0.0435328	0.493791	-0.412667	-0.663288	0.0941661	-0.164882	-0.378784	0.0677502	-0.365485	-0.995426	0.457646	-0.112325	0.309713	0.0264259
300	0.0255357	-0.342499	0.445943	0.406749	0.314328	-0.273626	-0.178979	0.339295	0.0923977	-0.109774	0.306134	0.0666971	0.454068	-0.0199223	-0.017427	0.399239	0.211693	0.399773	-0.376462	0.151949	-0.105627	-0.609592	-0.245596	0.0948346	-0.218134	0.262507	0.352029	0.319975	0.470885	0.114402	0.200688	-0.0389864	0.136706	300	-0.0965205	-0.275206	0.334674	0.4219	0.109235	0.449808	-0.181785	0.331482	0.443976	-0.199742	-0.579674	0.0759859	0.0333325	0.240103	0.127244
301	0.0944997	0.190406	0.27446	-0.936586	0.263384	0.205977	0.52955	0.215757	-0.145029	0.0131413	-0.0512088	0.188509	0.562137	-0.0119442	0.00970582	0.159846	-0.0262138	0.541892	-0.0884034	-0.418151	0.03168	-0.0479733	0.0405769	0.147017	-0.318941	0.437247	0.342043	0.24891	0.821614	-0.247642	0.274426	0.186627	-0.00857969	301	0.26148	-0.323491	0.456305	0.269264	0.0260319	0.18984	-0.163443	0.198286	0.198754	-0.241548	-0.702486	0.118466	0.296294	0.124171	-0.157829
302	0.0679391	-0.155007	0.214547	-1.44116	1.00179	-0.148631	-0.0206723	0.668585	0.156079	0.0872239	0.44141	-0.0780943	0.372721	0.00808069	-0.106272	0.539232	0.304551	0.266311	-0.0961864	0.245228	0.142565	-0.166801	0.151017	-0.552043	-0.0713997	0.346725	0.569651	0.348072	1.03923	-0.25844	0.0266352	0.111356	0.314819	302	0.694396	-0.199279	0.492634	0.122647	0.0573944	-0.0392179	-0.369119	0.237693	0.349726	-0.44549	-0.16718	0.238639	0.112519	0.0878494	0.0881351
303	-0.674664	-0.0218745	-0.00471551	-0.29478	0.31524	-0.511325	-0.303573	0.459746	-0.302741	-0.160274	0.265965	0.117791	0.364895	-0.195847	0.0208343	0.696686	0.19098	0.405364	-0.073109	-0.768955	-0.160103	-0.154904	0.509142	0.329337	-0.263888	0.372647	0.439546	0.438877	0.599931	-0.144419	0.004443	0.31175	0.138504	303	0.158177	-0.106957	0.317059	0.0239544	0.37644	0.541871	0.0698564	-0.158902	-0.0158725	0.0738901	-0.467688	-0.187538	-0.166995	0.281178	-0.0577468
304	-0.0829538	0.0794791	0.389589	-0.706715	1.12936	0.204827	-0.0228705	0.553777	0.480312	0.0279849	-0.210904	0.35233	-0.23566	0.0492243	0.181594	0.20593	0.157343	0.546692	-0.200569	0.319981	-0.0206109	0.0838648	-0.0829724	-0.850465	-0.00549937	0.116041	0.539773	0.0153493	0.71829	-0.0797571	0.357428	0.310074	0.210893	304	-0.0982211	-0.0274537	0.510307	-0.459423	-0.128851	0.522627	-0.299377	-0.189101	0.0735196	-0.184364	0.189133	0.0923534	0.161314	0.0971767	0.0520658
305	0.0748734	-0.351015	0.228302	0.082518	1.18491	0.167505	0.344765	0.557429	0.43435	-0.677498	-0.242249	0.324934	-0.190881	0.0351747	-0.0226496	0.290535	0.267691	0.61027	0.110456	0.263837	0.142352	0.300757	0.63368	0.290827	-0.550754	0.227429	0.153253	0.3476	0.0614072	-0.303557	0.0330566	0.238896	0.145069	305	0.280532	-0.351945	0.317859	-0.749042	0.225403	-0.171008	-0.1133	-0.159383	-0.00845671	0.0227202	0.017258	0.0434736	-0.40948	0.0709572	0.155419
306	-0.197752	0.17118	0.259902	0.0901671	0.77392	0.365986	0.106644	0.288605	0.244498	0.0149996	-0.241885	0.342125	0.371227	0.0486824	-0.196968	0.472348	0.196114	0.0905347	-0.767645	0.0454376	0.243816	-0.30236	0.0177901	-0.193081	-0.0446998	0.35883	0.577741	0.367509	0.501784	-0.0721961	-0.241974	0.126028	0.25116	306	-0.869235	0.029711	0.241382	-0.209925	0.531956	0.0772156	-0.0606251	0.0534084	-0.279194	-0.383457	-0.0513875	0.159744	0.0742623	-0.395282	0.00343384
307	-0.523306	0.546812	0.18897	-0.628572	0.792532	-0.177275	0.522959	0.515723	-0.127264	-0.0400531	0.277303	0.0708061	0.459534	0.0226468	0.129609	-0.42231	0.291605	0.340471	-0.0221801	-0.348985	0.14297	-0.549484	-0.0635952	-0.157943	0.096515	-0.0861142	0.573465	0.423778	0.359401	0.175556	-0.193864	0.17583	0.142645	307	0.172067	-0.211536	0.547545	-0.746583	0.246696	0.553651	-0.383785	-0.129033	-0.188947	-0.118736	-1.58793	-0.0623055	-0.899007	-0.00153416	-0.528541
308	-0.00416631	-0.0765532	0.182439	0.242884	0.471156	-0.0192087	0.126403	0.605848	-0.286255	0.107584	0.28958	0.0890562	-0.0572712	0.0674338	0.214566	0.66031	0.442479	0.269267	-0.185441	-0.0473122	-0.454399	-0.336219	0.148775	0.101448	0.599034	-0.118858	0.677462	-0.268426	0.581803	-0.341609	-0.152275	0.134204	0.136099	308	0.310146	-0.0789855	-0.0108673	-0.573411	0.457984	0.274823	-0.0108079	-0.233183	0.31885	-0.232904	-0.284296	0.170181	-0.734219	-0.0782709	-0.85917
309	-0.0235841	0.039081	0.454557	0.214416	0.905363	0.0180256	-0.42933	0.804698	-0.179819	0.0439794	0.459466	0.179784	0.184261	0.0329365	0.0214592	0.0822751	0.110024	-0.182687	0.494656	0.150759	0.189178	-0.469309	0.202345	-0.254137	0.215327	0.233476	0.170867	0.0143249	0.135515	-0.193857	-0.114066	-0.268282	0.0526028	309	0.459094	-0.0492778	-0.271418	-0.509918	-0.131855	-0.103376	-0.12553	-0.184451	-0.040778	-0.289808	-0.104223	0.343234	-0.369628	-0.0506227	-0.645356
310	-0.284672	-0.0148666	0.0653289	-0.251666	0.425888	0.0948012	-0.270872	0.178587	-0.163572	0.30757	0.112719	-0.137846	0.476634	-0.00613351	0.159478	0.352718	0.0765312	0.214843	-0.428787	-0.467687	-0.162193	-0.433054	0.162496	-0.328758	0.105863	0.0151598	0.101886	0.347855	0.29111	-0.166383	0.0317824	0.340371	0.101099	310	0.238648	-0.339692	-0.01906	-0.314333	-0.0142144	0.236515	-0.0587572	-0.678521	0.262894	-0.0690522	-0.381672	0.652658	-0.423926	-0.119758	-0.65656
311	0.444195	-0.0113391	0.592669	-0.0988532	0.465237	-0.0867222	-0.557845	0.597989	0.111101	0.318351	0.0317001	0.0256005	0.365691	-0.190814	-0.128745	-0.540801	0.0543269	0.161426	0.0405134	0.116191	-0.0807973	0.311084	0.466097	-0.1322	0.442756	0.234651	-0.291363	0.498333	0.47756	-0.469349	0.0907299	0.383526	-0.0398626	311	0.113333	-0.337016	0.135095	0.0794591	0.218014	0.403045	-0.0784516	0.117754	0.271476	-0.391083	0.43213	0.0408088	-0.385376	-1.20758	-0.334162
312	0.282464	0.168495	0.197522	0.0391979	-0.00539562	0.121688	-0.572635	0.525902	-0.0330795	0.112887	-0.239219	0.205435	0.230735	0.0542273	-0.137421	0.470925	0.28779	0.0841988	-0.288795	0.207382	0.222852	-0.551388	0.138883	0.1449	0.795317	0.0477788	-0.753716	-0.0882746	0.503498	-0.126586	-0.0223117	0.396543	-0.296479	312	0.0475264	0.277287	0.253933	-0.470673	0.0864371	-0.463451	0.0818912	-0.27923	0.390187	-0.314168	0.0804541	0.521549	-0.336587	-1.17265	0.0193668
313	-0.144132	0.321097	0.281725	-0.498888	0.132129	0.0377943	-0.107217	0.424765	-0.0528697	0.23145	0.351244	0.169114	0.233528	0.0169803	0.0790727	0.396818	-0.382812	0.0676328	0.106389	-0.691432	0.17832	0.0875557	0.237068	-0.315098	0.132748	0.19475	-1.12054	0.061219	0.708536	-0.366692	-0.256691	0.478329	-0.368529	313	0.463197	-0.10661	0.289017	-0.3106	0.398316	0.386215	-0.0291784	0.135511	-0.124807	-0.351558	0.192933	0.323407	-0.0678219	-0.330789	0.0714449
314	-0.474963	0.0924823	-0.0769355	-0.48251	0.138972	0.048855	-0.487854	1.01095	0.285324	0.326071	-0.332692	-0.147573	0.0587187	-0.0771436	0.0178482	-0.0484726	0.212224	0.0109225	-0.188895	0.0421348	-0.468875	0.116011	-0.223822	-0.180897	0.0221188	0.0120581	-0.536281	0.182012	0.320438	-0.148366	-0.50967	0.252537	-0.0988828	314	-0.175053	0.0469273	-0.0615078	-0.265096	0.185359	0.371695	-0.45965	-0.804899	-0.0301548	-0.173231	-0.0112128	0.572945	0.0806835	-0.584094	0.926083
315	0.261469	0.166956	0.0586281	-0.279196	0.132792	-0.114197	0.438593	0.679946	0.232551	0.248011	0.116691	0.0188095	0.24372	-0.346729	-0.0135957	-0.559856	0.0222313	0.515995	-0.179545	0.131514	-0.227094	-0.00780554	0.341895	-0.475143	0.212148	-0.164656	-0.724137	0.542612	0.0668461	0.0797835	-0.320979	0.235483	-0.127859	315	-0.244047	-0.670352	0.132527	-0.181623	0.390962	0.083266	-0.168192	-0.0326187	-0.457385	0.209525	-0.532399	0.0274704	0.097516	-0.354066	0.960191
316	0.351581	0.357543	-0.141569	-0.438638	0.0854555	0.290652	-0.305785	0.490721	0.138434	0.0108041	0.214224	0.142782	-0.0629143	-0.312181	-0.49802	-0.448885	-0.237648	-0.189136	0.292963	-0.0496333	-0.0307179	0.186318	-0.118281	0.109411	0.354126	0.0959522	-0.795798	0.227661	-0.0862869	0.342946	-0.467745	-0.110177	-0.070085	316	-0.246535	-0.279682	-0.107965	-0.118595	-1.11545	-0.211397	-0.149468	-0.320102	-4.5355e-05	0.0362159	-0.680439	0.45477	-0.0920632	-0.199896	0.250377
317	0.404413	0.262684	-0.0691418	0.0604489	-0.0656618	0.504773	-0.355689	0.214756	-0.128544	-0.091598	-0.189013	-0.258695	-0.208023	-0.077136	0.180074	-0.0728614	-0.0838911	0.144552	-0.0526669	0.0861221	0.544463	-0.112137	0.0907656	-0.398298	0.209969	0.198817	-0.260798	0.0663751	0.0433684	-0.125289	-0.219458	-0.0477592	0.0757263	317	0.183485	0.186873	-0.220087	0.0294633	-0.413699	0.338837	-0.276939	-0.31079	2.86627e-05	-0.38174	0.48815	0.39938	0.0627248	-0.410335	0.460061
318	0.282388	0.0970236	0.162212	0.288659	0.412164	-0.44495	-0.384519	-0.287891	0.281171	0.182228	-0.350375	-0.134928	0.18739	-0.4065	-0.105491	0.225926	0.3233	0.0921026	-0.0664622	0.345364	0.476544	-0.00965602	-0.117034	0.207595	0.125856	0.327371	-0.0598306	0.140381	0.207086	-0.138322	-0.0763663	0.0754923	-0.0615405	318	-0.949462	-0.193773	0.0159008	0.189514	0.263311	-0.768119	0.105	-0.00706774	-0.0855043	0.14781	-2.15266	-0.10686	-0.116811	-0.0056171	-0.0997198
319	-0.107872	-0.0565768	0.0829589	-0.238154	-0.0213211	-0.327442	-0.119229	0.105452	-0.347091	-0.0311698	-0.333779	-0.0582603	-0.0627367	-0.0657677	-0.0643173	0.0620312	0.271919	0.084094	0.00165479	0.367751	0.0346313	-0.0728065	0.143106	0.0564061	-0.127318	0.061112	-0.163062	0.0496111	0.0797569	-0.111909	-0.00199031	-0.0194471	0.0976402	319	0.224475	-0.0775636	-0.164891	-0.132409	0.559484	-0.0614838	-0.383408	0.333451	-0.135455	0.413779	1.00406	0.00225389	0.142868	-0.503117	-0.0768786
320	-0.329314	0.166681	-0.138431	-0.320864	-0.335756	-0.153014	-0.0755629	0.240709	-0.0245219	0.14517	0.610654	0.0431293	0.0293625	0.306244	0.150694	0.182772	-0.0717456	-0.230183	-0.057787	0.537607	-0.202262	0.0487283	-0.22619	-0.307493	-0.0103894	0.00760742	-0.116673	0.211708	-0.139474	-0.117072	-0.117544	-0.117879	0.712235	320	0.342653	0.013939	-0.205898	-0.223843	0.323812	-0.192015	-0.0887896	0.244304	-0.0660494	0.100188	0.632274	0.101365	0.0929614	-0.174888	-0.0741209
321	-0.0424954	-0.203142	0.0472292	-0.109875	0.637935	-0.0371485	-0.0859186	-0.129827	0.242437	0.0725578	-0.605757	0.0116474	0.00867756	0.2585	-0.122754	-0.0694843	-0.347181	-0.293036	-0.158652	0.0266636	-0.237892	0.377209	-0.0678356	0.066153	-0.596784	-0.501435	-0.115375	-0.041176	0.0012256	-0.167335	0.473999	0.0630628	0.29445	321	0.17593	0.240749	0.187969	-0.0254255	0.211714	0.25075	-0.146961	-0.111243	0.177443	0.306912	0.573075	0.183015	0.0702723	-0.2006	-0.196238
322	0.0250841	-0.00416962	-0.27804	0.147967	0.217419	0.0307937	0.142901	-0.353832	0.238088	0.138673	0.391887	0.0781034	0.30432	0.00322439	0.213105	-0.112969	0.120454	0.206488	-0.220156	-0.638543	-0.312098	0.0648754	0.0359504	0.476356	-0.277429	0.0612293	0.00594476	0.00993728	0.126922	-0.380529	0.112403	0.0798312	-0.193305	322	-0.12505	0.0710133	0.405163	0.227356	0.369955	-0.0928892	0.359592	0.42226	0.239411	0.142237	-0.0222966	-0.509006	0.143387	-0.0922938	0.00687863
323	-0.429622	-0.339951	-0.039229	0.258368	-0.0942194	0.171778	0.403591	-0.230928	0.333317	-0.0873354	-0.0310565	0.190527	0.314531	0.130213	0.0322258	0.139682	0.132592	0.20426	0.246228	-0.372587	-0.29798	-0.277037	0.099762	-0.603623	-0.511981	-0.144444	0.0484414	-0.298282	0.0403216	0.193056	0.1301	-0.116656	-0.248142	323	0.390159	-0.270868	0.209571	0.142449	0.0605868	-0.0174247	0.618401	-0.32587	-0.40353	-0.163677	0.481971	-0.643275	-0.0428444	-0.00488586	-0.376396
324	-0.0813069	-0.259894	0.167034	0.0703867	-0.391223	-0.056959	0.263883	-0.364811	-0.279797	-0.326879	-0.0494946	-0.194642	0.326528	0.105088	0.00510355	-0.00772861	-0.0727685	-0.170291	-0.0368577	-0.186006	0.140119	-0.162602	0.192585	0.458577	0.370302	0.0987153	0.646466	-0.188595	-0.118838	0.487573	0.100559	-0.000394896	-0.474839	324	-0.228071	0.027464	-0.0582918	0.0979656	-0.261184	0.37057	-0.0181329	0.11226	0.259391	-0.418671	-0.16418	-0.390503	-0.339988	1.1133	-0.073282
325	-0.0728559	-0.0201971	0.206976	0.281702	-0.444792	0.0215164	0.516329	0.315652	-0.453493	-0.0124513	0.34271	0.180335	-0.837136	0.0583163	0.209381	0.101517	-0.0350306	0.151149	0.0517358	-0.116738	-0.114808	-0.0428934	-0.0328303	-0.0650841	0.463647	-0.204924	0.810685	-0.177621	-0.154082	0.0168809	0.0660412	0.193928	-0.13214	325	0.232416	0.281848	-0.0614714	-0.186476	0.00146662	0.383171	-0.0192946	-0.0372015	0.0143122	-0.183053	-0.159954	0.50886	0.0794938	0.478331	0.179319
326	0.348953	0.0416151	0.0913833	0.0750847	-0.628803	0.0811376	0.230001	0.0640702	-0.568824	0.0895754	0.350463	0.244082	0.0654429	0.253286	-0.111363	0.0882899	0.0566056	0.56961	-0.0526651	-0.189854	-0.0123443	0.519165	0.623779	0.52325	0.252537	0.0204437	-0.258626	-0.139869	-0.260559	0.138683	0.388296	0.375822	-0.0752665	326	0.378688	-0.0768852	0.461791	0.282966	0.224259	0.550444	0.645318	0.677141	0.510085	0.229777	0.807523	0.0829635	0.304542	0.329631	0.211112
327	0.530255	0.226244	0.392763	0.603559	0.0569386	0.480591	0.31046	0.348604	0.0298073	0.413373	0.532815	0.588112	0.270834	0.518502	0.207472	0.25189	0.567545	0.306635	0.679877	0.357565	0.0744945	2.00095	0.947806	1.43076	0.693165	0.298399	1.17477	0.746021	0.193868	0.487765	1.2068	1.04161	0.642243	327	-0.377868	-0.205834	1.0384	0.558825	1.03579	0.265979	0.966732	0.610497	0.878807	0.603122	1.03654	0.652499	0.834741	0.444533	0.319611
328	0.917173	0.465941	0.315258	0.522339	0.689448	0.35494	-0.10289	0.496706	0.0817253	0.48188	0.304069	0.810614	0.24349	0.0862458	0.319891	0.943074	1.21624	0.804132	0.618057	0.923257	-0.209626	2.43982	1.46094	2.46002	0.781427	0.776063	0.719534	0.727856	0.714794	0.538016	1.62199	1.32488	0.582952	328	0.289057	0.0097695	0.89751	0.678938	0.974692	0.994407	1.15693	0.974339	1.17588	0.824844	-1.62828	0.929911	0.841182	0.52539	0.537479
329	0.433294	0.421085	0.659866	0.787721	0.371072	0.424966	-0.10714	0.522063	-0.566121	0.335871	0.55643	1.19351	0.369947	0.347739	0.819537	1.20752	0.946125	0.958511	0.868048	0.693839	-0.0732691	2.92623	1.28046	2.72587	1.02425	0.391018	0.972737	1.15848	0.86567	0.692242	1.45943	1.50203	0.68725	329	0.152976	0.00473528	0.214395	0.570511	0.820422	1.13356	0.940559	1.04027	0.943274	1.11489	1.13518	1.0708	0.681146	0.41386	0.480875
330	0.754001	0.92875	0.577706	1.06228	0.153631	0.44571	0.147781	0.539934	-0.180111	0.337112	0.980641	0.986133	0.483062	0.0162029	0.662715	1.65402	1.59425	0.690851	0.887609	0.670114	0.099915	3.24169	1.68946	3.04061	0.995035	0.977614	1.32455	1.24751	0.652778	0.911054	1.49375	1.36656	0.874937	330	0.358137	0.126931	0.7267	0.471044	0.909235	0.917603	0.954311	1.40038	1.22606	0.710588	1.61129	1.03393	0.679131	0.506077	0.63468
331	0.929444	0.536822	0.640547	1.29573	0.662609	0.352956	0.402013	0.443427	0.555104	0.524838	0.572307	0.785355	0.911511	0.280218	0.974909	1.92791	1.52172	1.11325	0.291078	0.925807	0.993134	3.39285	1.4688	3.32161	0.675691	0.8258	1.50981	1.38479	1.22697	0.908028	1.84467	1.66083	0.909974	331	0.593765	-0.0807715	0.688029	0.349164	0.844591	0.966797	1.0323	1.18283	1.08788	0.644529	1.28306	1.46108	0.588333	0.765121	0.530893
332	1.32324	0.869778	0.590914	1.23301	0.950237	0.40824	0.392799	0.958488	-0.0817919	0.689838	0.743875	1.03052	0.938544	0.305089	1.02188	1.59302	1.42331	0.177766	0.473305	0.798122	0.473772	4.41913	1.96139	3.65741	1.13233	0.859881	1.60523	1.66797	1.13012	0.857703	1.90342	1.67032	1.02785	332	0.434916	0.000929497	0.978826	0.58347	1.25054	1.40173	0.149639	0.735959	1.40883	0.597596	1.39205	1.19488	0.792904	0.370393	0.170363
333	1.14191	0.714476	0.869036	1.11242	0.771779	0.705549	0.599025	0.648384	0.197774	0.792325	0.726898	1.08305	0.364037	0.652658	0.578896	1.99824	1.1569	1.37993	0.65986	0.673005	0.528193	4.74464	2.20282	4.19662	1.13098	0.88857	1.47676	1.65087	1.13497	1.14941	1.96587	2.06546	1.30445	333	0.0523518	0.088718	0.956874	0.480751	1.07089	0.765686	0.816233	1.13964	1.68691	0.835691	1.16801	1.51318	0.893388	0.619468	0.418348
334	1.72074	0.598756	0.785043	1.79953	1.04674	0.700206	0.157657	0.48177	0.360034	1.10229	1.0311	1.28522	1.11907	0.6586	1.14895	2.01962	1.39257	1.01177	0.968172	1.56756	0.969237	5.15557	1.6582	3.94643	1.15833	1.22444	1.48533	2.01457	1.13087	1.05769	1.96896	2.08141	1.45219	334	0.192354	-0.506334	1.03319	0.739507	0.672273	1.62517	0.935399	0.767923	0.980693	0.851641	1.26557	1.35257	0.424463	0.207471	0.416812
335	1.81195	0.918968	1.22043	1.03094	1.11072	0.914426	0.242214	0.766406	0.583143	1.35182	1.12274	1.06073	1.02617	0.691629	1.0797	1.79544	1.15219	1.49776	0.415721	1.49859	0.826362	4.9048	2.12879	4.06658	1.4764	0.979088	2.01944	2.11123	0.970914	1.17712	2.80008	1.74008	1.52358	335	0.500898	0.0608821	0.988037	0.918808	0.185316	1.24471	0.822037	1.35565	1.42613	1.0907	1.66854	1.32592	0.650228	0.489699	0.300962
336	2.20054	0.587961	1.22963	1.52361	1.25334	1.09042	0.120417	0.494883	0.47066	1.14556	1.38705	1.53048	0.573661	0.905801	1.2772	2.11498	1.36685	1.26267	0.937962	0.939285	1.05458	5.22368	2.48908	4.61256	1.16142	1.15338	2.21819	1.62818	1.46695	1.60542	2.81368	2.01773	1.24937	336	0.511473	0.0884508	1.13436	0.847596	0.383258	1.2391	0.854988	0.962763	1.74755	1.12629	1.00954	1.37051	0.697191	0.361055	0.555929
337	2.05068	0.932748	1.74286	1.50457	1.21875	0.899423	0.559336	0.477567	0.643606	1.22763	1.07995	1.17742	1.1807	0.608658	0.882436	2.42465	1.44879	1.15536	0.993813	0.714341	1.02414	5.34253	2.66638	4.65792	1.31623	1.32453	2.7736	2.19161	1.86728	1.30706	3.03257	2.356	1.6182	337	0.222813	-0.275183	1.28683	0.942198	0.90454	1.2876	0.793766	1.2638	1.19059	1.13373	1.60465	1.46635	0.616633	0.396908	0.484073
338	1.98414	0.481269	1.36385	1.55391	1.17753	0.842181	0.752804	0.844169	0.949788	1.32648	1.58196	1.14662	1.19372	0.568707	1.30054	2.61105	1.52251	1.60458	1.36185	1.56351	1.1046	5.22471	2.61149	4.63304	2.12694	1.35172	2.46739	2.18355	1.80981	1.39883	3.03512	2.42429	1.805	338	0.678435	-0.333248	1.02955	0.511791	0.40172	1.4197	0.55649	0.90392	1.46176	0.859305	0.537363	0.812804	0.828747	-0.624208	0.397385
339	2.14477	1.00158	1.38079	1.8186	1.13368	1.04833	0.608565	0.768288	0.858054	1.27879	1.38608	1.1399	1.18412	0.860113	1.0537	2.45172	1.54523	1.75566	1.19925	1.44135	0.993812	4.86876	2.48046	5.05631	2.01511	1.47408	2.51178	2.10344	1.68432	1.76948	3.00238	2.72473	1.8484	339	0.138217	0.21661	1.25255	0.677572	0.746447	1.08179	0.983771	1.001	1.12386	1.10176	1.44601	1.31435	0.549081	-0.376335	0.551219
340	2.1089	1.04992	1.40187	1.62902	1.31005	0.540607	0.273156	0.875037	0.838847	1.44163	1.49215	1.19715	0.829308	0.587124	1.1963	2.54959	1.30528	1.80898	0.465944	1.77046	0.896615	5.13312	2.72753	4.43584	1.93487	1.81385	2.34196	2.30362	1.99007	1.34451	3.01121	2.63243	2.68178	340	0.458696	0.0823459	1.43908	0.740291	0.361743	1.61137	1.04481	1.5606	1.31669	0.835252	-0.605188	1.08993	0.663065	-0.254833	0.322491
341	2.6457	0.997214	1.52397	2.09002	1.30276	0.634617	0.426075	0.850425	1.02207	1.48936	1.53647	1.23275	1.4556	0.650627	1.19236	2.66976	1.63548	1.78731	1.27983	0.934759	0.829076	5.32951	2.11304	4.80489	1.74829	2.37825	2.83461	1.69277	2.14849	1.69204	3.11121	2.68074	3.38392	341	0.272353	0.484089	0.962171	0.427174	0.603948	1.30916	0.467128	1.41821	1.2973	0.469763	1.28867	1.16563	0.392856	0.456655	-0.343185
342	2.17299	1.31649	1.57066	2.05918	1.14157	0.796102	0.944644	0.836219	0.558769	1.32769	1.51023	1.58071	1.11206	0.809244	1.44185	2.59373	1.78194	1.60511	1.54028	1.23186	1.35819	4.87862	2.09441	4.72411	1.8756	2.09408	2.98851	2.03946	2.00638	1.60137	3.4993	2.80841	2.92954	342	0.181211	0.320495	1.35735	0.950802	0.577859	1.35153	0.894862	1.38096	1.32579	0.83402	-0.5602	1.09122	0.58047	0.125833	0.155592
343	2.32777	1.30487	1.71351	2.18269	0.699043	1.008	0.731289	0.991941	0.859111	1.80702	1.75699	1.74894	0.7753	0.839918	1.64798	2.66033	1.68922	1.63518	1.52481	1.24268	1.32553	5.22394	2.11372	5.19971	1.72426	1.63346	2.93492	2.31778	2.21162	1.7193	2.57488	2.98239	2.91979	343	0.463666	0.284156	1.43969	1.04897	-0.216194	1.30032	0.981093	1.20539	1.10224	1.1069	0.745298	1.32856	0.218609	0.336243	0.0544895
344	2.44274	1.46428	1.5514	1.96068	1.52955	1.107	0.949442	0.548388	1.07494	1.73194	1.62808	1.53475	1.10016	0.61141	1.49789	2.41029	2.00695	1.32151	1.72051	2.15599	0.904809	5.53632	2.59275	4.87802	2.00679	2.41993	3.18263	2.08503	1.63477	1.92849	2.95774	3.95491	2.82902	344	0.472227	0.165546	1.11776	0.958195	0.654447	0.874326	1.2071	0.917152	1.16827	0.411706	0.905102	1.3459	0.604678	0.236341	0.351706
345	2.55898	0.412287	1.8299	2.42847	2.48017	0.504693	1.20243	1.3522	0.997371	1.44532	1.89302	1.63774	1.16325	0.954892	1.19854	2.63335	2.11282	1.60966	1.61181	1.91047	1.22645	5.65002	2.47001	5.02389	2.27904	1.76591	3.69783	2.03726	1.96873	1.17489	2.9804	3.79984	2.82542	345	-0.175276	-0.100582	1.19833	0.704443	0.0184352	0.810251	1.22773	1.11614	1.18588	0.902459	1.0404	1.28122	1.24098	0.698588	1.59511
346	2.50076	1.27472	1.52564	0.317785	3.00074	0.957602	1.14451	0.790216	1.02678	1.10483	1.66496	1.76959	0.986745	0.620439	1.45323	2.64629	2.17043	0.931638	0.977264	1.71514	1.53676	5.6707	2.15244	4.89918	2.17874	1.76794	3.03922	2.17763	1.97623	1.65747	3.0956	3.44749	2.76545	346	0.208558	0.135726	1.08798	0.942024	0.987442	1.10069	0.745754	1.0522	1.61534	0.976735	1.21919	1.25041	1.21147	-0.0545928	0.134701
347	2.98233	1.60764	1.31434	0.628258	2.41104	0.876387	1.06877	1.24585	0.607087	1.51459	1.34626	1.5197	1.29289	0.930181	1.43065	2.90157	1.85507	1.37251	1.2735	1.77799	1.3872	5.83013	2.47004	4.48353	2.01893	1.68695	3.17831	2.02369	1.92961	1.33934	2.97404	3.26984	2.7537	347	0.457644	-0.231442	0.39574	0.836959	0.659897	0.934104	1.19075	1.21121	1.28063	1.13694	0.52426	1.13207	1.01869	0.106424	0.340381
348	2.85184	1.47866	1.45235	1.29662	2.30921	0.783125	1.3839	1.35277	0.509136	1.7236	1.75997	1.27807	0.872159	0.622723	1.22701	3.31497	1.88986	1.88355	0.740165	1.80699	1.72603	5.2127	2.39383	4.19665	2.1822	2.12624	3.60235	2.35648	1.73469	1.28842	3.22885	3.4244	2.67687	348	0.326135	0.395244	0.850529	0.757229	0.517783	1.41272	0.57547	1.13373	1.24146	0.866733	0.72172	0.879904	0.852811	0.479361	-0.0861522
349	3.31264	1.65911	1.68174	1.49268	2.00348	0.861362	1.16135	1.23034	0.904525	1.48961	1.35695	1.70159	1.07101	1.13541	1.67017	2.79911	1.68066	1.81202	1.20992	2.38864	1.70356	5.65549	2.06582	4.42603	1.92103	2.79061	3.11151	1.97227	2.00597	0.912703	3.2338	3.38909	2.73261	349	0.0907047	-0.0569555	0.0952739	0.639354	0.135145	1.52412	1.41266	0.553936	1.17325	0.802492	0.900656	1.27873	1.19403	0.108288	0.297095
350	2.66626	1.3591	1.33599	1.8449	1.79335	0.740617	0.813331	1.16973	0.701435	1.30803	1.50143	1.51595	0.893039	1.16595	1.24125	3.21206	1.95646	1.88192	1.45995	1.57977	1.37328	4.96732	2.11237	4.69069	2.3162	2.91235	3.23416	2.29315	2.06055	1.77889	3.32562	3.2933	2.71215	350	0.630137	0.241855	0.727566	1.38402	0.72891	1.27822	0.62927	0.852716	0.776671	1.10789	0.991872	0.537016	0.89615	-0.139848	0.348149
351	2.65372	0.833827	1.81475	1.74864	1.4202	0.291468	1.42172	0.44995	0.540996	1.76298	1.91098	1.95143	1.1462	0.882155	1.43366	3.00185	1.62444	1.26465	1.65277	1.98315	1.38723	4.99146	2.32947	4.81132	2.13267	2.97939	3.75189	2.39534	1.81585	1.56822	3.18404	3.40775	2.89547	351	0.268422	0.0210097	0.791813	1.95861	0.73248	1.08665	1.32452	0.919484	1.23175	0.860903	0.734198	0.495724	0.890635	0.412208	0.416611
352	3.14323	1.06651	1.68043	1.51982	1.76808	0.683898	1.21306	1.07462	1.03628	1.64285	1.69159	0.80929	1.38277	1.00386	1.6034	2.55525	1.97573	1.63888	1.34444	1.94829	1.37485	5.62125	2.66085	4.68777	2.3634	2.97143	3.52093	2.40096	1.77625	1.64336	3.30926	3.34632	3.43937	352	0.348719	-0.000222157	0.945291	1.26727	-0.311802	1.4392	0.380594	1.36723	1.10843	0.564855	0.911347	0.732651	0.843576	0.587774	0.181644
353	2.84815	1.2996	1.75779	2.66739	1.45675	1.09095	1.39647	1.12073	1.25821	1.73778	1.72765	1.77437	1.45301	0.793792	1.98668	2.74021	1.89025	1.57231	1.12955	1.94064	0.63983	5.25847	2.1327	4.59903	2.0544	2.72254	3.23765	2.24034	1.46797	1.70505	3.00876	3.43637	3.02835	353	-0.0885356	-0.0341291	1.14432	1.0046	0.282682	0.811358	0.591983	1.10341	0.927473	0.952769	1.13161	1.81521	0.982516	1.90906	0.407379
354	2.92518	1.09256	1.92394	2.63164	1.8301	0.765079	1.10484	0.707911	1.51811	1.65608	1.7626	1.75223	1.46692	0.889501	1.23388	2.61004	2.06645	1.48967	1.51392	1.98404	1.17385	5.14458	2.66784	5.0591	2.15004	3.08469	2.78965	2.09272	1.88758	1.20544	3.12483	3.43231	2.99475	354	0.300507	-0.13098	0.854677	0.883845	0.330626	0.999383	0.448588	1.61622	0.995561	0.93912	0.943157	3.00527	1.21656	1.46332	1.20726
355	3.00572	1.2596	1.85868	3.01194	1.69436	0.853276	0.998984	1.42847	1.45748	1.50551	1.89369	1.65922	1.20727	0.941838	1.47151	2.64894	1.62509	1.56561	1.19178	1.78349	1.5968	4.11607	2.37084	4.85969	2.41314	3.26514	3.49888	2.23214	2.25131	1.26033	2.98139	3.33054	2.88949	355	0.274027	-0.626159	1.01357	1.09799	0.453546	0.703475	0.880266	1.34642	0.64039	0.869962	1.18502	2.03682	0.61638	1.17327	0.58637
356	2.85332	1.65168	1.8773	2.77653	1.33207	0.917405	0.999133	1.08884	1.6013	2.15716	1.86282	1.47987	1.31306	0.749592	1.45068	2.80219	1.86714	1.18666	0.410864	1.70916	0.882228	4.20193	2.38901	4.54407	2.46079	3.034	3.83158	2.24994	1.99192	1.55555	2.87141	3.24048	2.77237	356	0.589774	0.114512	1.14439	1.39622	0.721477	0.778399	0.592267	0.616791	0.789958	1.26214	0.950696	1.36254	1.19877	0.9332	0.263921
357	3.20731	1.10193	2.09018	2.14336	1.58327	0.419779	0.830074	1.26284	1.38208	1.72194	1.62425	1.61712	1.37327	0.699189	1.6535	3.01723	2.12752	1.25341	1.70368	1.55854	1.60086	3.96165	2.71673	4.92174	2.20974	2.80127	3.46715	2.34862	2.09835	1.32021	2.87073	3.19666	2.83117	357	0.339579	0.284997	1.12872	1.10997	0.183405	1.25367	0.824222	1.42973	1.00399	1.22481	0.584736	1.44712	1.21171	0.678625	0.488689
358	2.68529	1.1054	1.70537	2.71447	1.50514	0.736466	1.23666	1.27553	0.547153	1.6489	1.8764	1.5796	1.21689	0.962172	1.42837	2.70515	1.91492	1.60468	1.47164	2.09435	1.34892	4.43285	2.63567	4.20723	2.11247	3.01884	3.60386	2.27399	2.05798	1.98618	3.06031	3.24093	2.86229	358	0.24085	0.327369	0.869352	1.12122	0.25002	1.93484	0.790657	0.926289	0.844104	1.03691	0.873897	1.18204	0.892136	0.553249	0.274394
359	3.11665	1.42414	2.01482	2.9466	1.48122	0.381247	1.37483	1.61633	1.20774	1.61768	1.66902	1.56511	1.45239	0.851458	1.89671	2.97692	2.27881	1.31518	1.60453	2.09533	1.06426	4.80412	2.29602	4.325	2.29133	2.97935	3.80204	2.23015	2.11217	2.04736	3.07699	3.21471	2.98431	359	0.219989	-0.0739285	1.24986	0.988255	0.382647	1.10816	0.815229	0.793842	0.957523	0.585016	0.639148	1.2187	0.867621	0.320879	0.462862
360	3.47869	1.64057	2.14139	2.93248	1.48274	1.21225	1.40409	1.32658	1.15567	2.05885	2.01068	1.555	1.40253	1.07722	1.5226	3.19331	1.75506	1.27945	1.42771	1.58145	1.24976	4.47648	2.07572	4.40743	2.72551	3.11111	3.73868	2.27548	2.38285	1.39695	3.34054	3.10005	2.34365	360	0.724539	0.0467821	1.44658	0.390087	0.0860178	1.13388	0.487653	1.24085	0.92798	0.916172	0.71217	1.07206	0.538347	0.240691	0.261846
361	3.46977	1.54886	2.36668	2.43131	1.97476	1.4701	1.32505	1.60592	1.26687	2.13257	1.61291	1.69449	1.30521	0.6477	1.27214	2.77765	2.02378	0.997912	0.999886	1.50881	1.5177	5.16938	1.92288	4.68841	2.665	2.87905	3.93465	2.64638	2.42974	1.08741	3.20688	3.31772	2.66614	361	0.354771	0.347407	0.95042	0.460018	0.529381	0.675832	0.726659	0.288469	0.987658	0.884316	0.378402	1.08359	0.549854	0.456316	0.121961
362	3.35583	1.60534	1.88756	2.47634	1.69806	1.14686	1.26032	1.40021	1.20967	2.18509	1.93984	1.7029	1.39813	1.03835	1.45901	3.08332	2.13021	0.905427	1.5541	1.95715	1.72951	5.1553	2.40842	4.25318	2.65787	3.08228	3.85877	2.64715	2.60882	1.45408	3.75397	3.15068	2.81704	362	0.244373	0.172281	0.943901	0.94654	0.518817	1.56701	0.496869	0.936532	0.465829	1.06757	1.18516	1.37824	0.4796	0.235346	0.436978
363	3.43787	1.19847	2.3169	2.70533	1.9247	1.09903	1.43954	1.40627	1.95697	2.11476	1.5477	1.6545	1.34671	0.647493	1.3949	2.97361	2.02309	1.09728	1.57236	2.27007	1.75892	5.4388	2.25228	4.26077	2.91907	2.9482	3.76864	2.50601	2.18624	1.66357	3.44048	3.14989	3.11821	363	0.603348	0.145531	1.18065	0.746068	0.825438	1.57803	1.3773	0.407738	0.639855	0.837442	1.17775	1.13104	0.789408	0.410089	0.270414
364	3.85701	1.5806	2.56312	2.70725	1.46882	1.11607	1.47108	1.46568	1.33768	2.12219	1.82093	1.6329	1.42262	1.14901	1.27535	2.9288	2.11716	1.21295	1.47191	1.23291	0.56631	5.93088	1.96062	4.71232	2.85135	3.17126	3.53542	2.59831	2.6439	1.88115	3.46019	3.14108	3.38827	364	0.623854	-0.164651	0.908009	0.404231	0.52454	1.81286	0.791316	0.834714	1.63122	0.88147	1.24984	1.08576	0.416635	0.361239	0.172767
365	3.56896	1.81415	2.13722	2.54347	2.10049	1.05077	1.89015	1.04133	1.65804	1.84723	1.66073	1.12532	1.17934	0.966382	1.68703	2.90423	1.87182	1.16021	1.04975	2.2905	1.29186	5.91784	2.18857	4.63167	2.64434	3.19941	4.00538	2.23658	1.84568	1.67538	3.18565	3.21022	3.34189	365	0.339767	0.562158	0.553599	0.763396	0.0166652	0.752215	0.5592	0.717653	1.08213	0.761784	0.947687	1.17648	0.541293	-0.15464	0.164716
366	3.5881	2.2771	2.33558	2.46805	1.70569	0.961575	1.31909	0.930574	1.38626	2.03368	1.91689	1.78635	1.12436	1.06252	1.41202	2.39121	1.63614	1.31818	1.43173	2.26348	1.65412	6.02805	2.49679	4.60281	2.76825	3.41888	4.25269	2.23555	2.21502	1.50264	3.38098	3.31273	3.26097	366	0.636592	0.113348	1.10818	0.696941	-0.277223	1.4752	0.942862	0.902882	0.767932	0.799113	1.0845	1.13735	0.975861	0.433512	0.0443152
367	3.36072	2.05428	1.82374	2.98676	1.4629	1.09034	1.47155	1.14383	1.80705	1.90225	1.72972	1.9511	2.0185	0.561367	1.76556	2.97919	1.76723	1.07434	1.69425	2.04584	1.99277	6.37623	2.10523	3.98446	2.65296	3.7828	4.32676	2.36573	2.39755	1.59366	3.63846	3.3851	3.25996	367	0.544158	0.0391861	1.06382	0.735232	0.413246	1.14248	0.444942	0.356578	0.940759	0.908349	0.772565	1.10677	0.927129	0.608402	0.7077
368	3.38077	2.29539	1.9138	2.73876	1.78696	0.901392	1.3963	1.54747	1.7391	2.02028	1.79903	1.92631	1.2589	0.896129	1.63988	2.99951	1.5862	1.27301	1.89883	2.44421	0.985403	5.8363	2.2156	3.91123	2.69107	3.71642	4.00474	2.15039	1.92638	1.65333	3.598	3.11039	3.70661	368	0.399074	-0.137339	0.944731	0.537238	0.669223	1.1487	0.576482	0.705575	0.829691	0.480851	0.892082	0.994207	0.580051	0.690279	0.124333
369	3.32837	1.97723	2.12841	2.88954	2.00455	1.0912	1.44262	1.51459	1.58084	2.16651	1.62416	2.09621	1.61265	0.843159	1.38994	2.3093	1.43441	1.30428	1.68872	2.02101	1.04871	5.18036	2.28652	4.51941	2.8773	3.61353	3.36716	2.42185	2.23235	1.72252	3.48647	3.22383	3.5022	369	0.299109	-0.0567449	1.144	0.649519	0.505157	1.43862	0.31414	0.949139	0.861816	0.589899	0.855819	1.665	0.681339	0.308578	0.392873
370	3.34557	1.7384	1.90902	3.11106	1.8501	1.08558	1.48603	1.68132	1.6447	2.12996	1.6708	1.7167	1.48915	0.693753	1.71637	2.77394	1.28708	1.29113	1.37248	1.76211	1.46847	6.00246	2.03012	3.96469	2.81468	3.30717	3.77079	2.32586	2.43131	2.51214	3.46383	3.35358	3.70197	370	0.568635	0.261201	0.996259	0.350563	0.489449	1.03706	0.834136	0.757119	0.969491	0.723848	0.466753	1.77696	0.671867	0.148679	0.0158332
371	3.40197	1.62293	2.10576	2.65966	1.66427	0.93964	1.08921	1.45878	1.87759	2.19633	1.4494	1.23723	1.29968	1.02801	1.88238	2.78822	1.80587	1.1462	1.13153	1.81159	1.59078	6.08228	2.66627	4.19874	3.1074	3.41732	4.22624	2.54224	1.84983	2.17767	3.60296	3.35737	3.25076	371	0.187357	-0.215163	1.0177	0.450873	0.500702	0.9511	1.01703	1.17317	0.692176	0.747929	0.942959	1.34578	0.785917	0.209402	0.239646
372	3.58026	1.76756	1.88939	2.64857	1.57056	1.25484	1.64127	0.48971	2.14822	1.8285	1.32767	1.69374	0.763746	0.64276	1.8276	2.48093	1.48908	1.30377	0.940229	2.07925	1.71384	6.34123	3.07759	4.51139	3.22909	3.34292	4.16423	2.46263	1.91561	1.94248	3.47081	3.18997	3.07417	372	0.239325	0.271108	0.282156	0.675665	0.00671242	1.27887	-0.194263	0.46959	1.14718	0.473036	1.0914	1.10491	0.265427	0.422742	0.190572
373	3.47198	1.82956	1.88903	2.32214	0.547971	1.28108	1.6784	0.630318	1.66939	1.8465	1.82862	1.78573	1.287	0.851418	1.80367	2.80629	2.24715	1.19526	1.69242	1.66922	1.44858	6.65284	2.40427	3.9858	2.86589	3.35523	4.14867	2.27219	2.1464	2.05045	3.43355	3.14373	2.99314	373	0.536078	0.163279	0.25669	0.818038	0.434887	1.05843	0.871446	0.879657	0.795472	0.738326	0.657426	1.19197	0.971124	0.934318	0.25345
374	3.3018	1.89422	1.72471	2.56969	1.04787	1.32447	1.43927	1.31309	1.39538	2.20455	2.01579	1.47924	1.1885	0.738502	1.58725	2.88087	1.93504	1.04903	0.66775	1.60752	1.28319	6.45083	2.56107	3.73933	2.27456	3.17122	4.56307	2.38579	1.87709	1.72014	3.2741	3.12713	3.36952	374	0.502503	0.0277429	0.933991	0.682306	0.218604	1.15633	1.11934	0.531494	0.534268	0.382375	0.327969	1.44929	1.33808	0.159316	0.179825
375	3.33503	1.75388	1.65593	2.46688	1.8128	1.33451	1.49088	1.68117	1.52204	1.65591	1.73159	1.8248	1.23766	0.73615	1.60946	2.59336	1.94835	0.971369	1.32232	1.85187	0.910737	6.20025	1.751	4.06107	2.91825	3.51459	3.67378	2.41705	2.39223	1.71309	3.05715	3.23329	3.5112	375	0.618815	0.113877	0.777712	0.45692	0.81547	0.842903	1.06418	0.647448	0.803501	0.447003	0.706645	1.28303	1.16814	0.39834	-0.16629
376	3.71764	1.55393	1.85787	2.73899	1.72679	1.15092	1.65916	1.43196	1.32031	2.21783	1.4586	1.67466	1.41755	0.714672	1.57027	2.38019	1.74783	1.04909	1.65041	1.97885	2.02068	5.73474	2.10262	3.41146	2.84007	3.31005	3.68095	1.99204	2.69788	1.90063	3.06782	4.04211	2.94243	376	0.616189	0.182392	1.05679	0.683814	0.346734	1.12471	0.493045	0.569638	0.258448	0.350258	0.789883	1.2163	0.532364	0.227452	0.0700439
377	3.62168	1.53577	1.97909	2.3192	1.68628	0.972446	1.37154	1.65551	1.69262	1.8916	1.9176	1.7189	1.49348	0.988212	1.60842	2.22554	1.90977	1.06565	1.96775	2.01313	2.03258	6.1345	2.16636	3.52178	2.60142	3.59844	3.88225	1.90116	2.29233	2.26719	3.2719	3.70493	3.15417	377	0.295359	-0.603393	0.97935	0.577444	-0.505826	1.1711	1.08323	0.759802	0.751025	0.512181	0.246015	1.21724	0.50537	0.141738	-0.879403
378	3.36362	1.7627	2.05078	2.27217	2.12534	1.1515	1.22963	1.8687	1.93235	1.92515	1.55798	1.65297	1.09875	0.668631	1.58836	2.57866	2.00745	0.929716	1.3281	1.20471	1.46937	6.09475	1.94719	3.46755	2.88256	3.41658	3.67432	2.68014	2.50717	2.27457	3.23368	3.19231	3.11922	378	0.355309	-0.152572	0.975362	0.610933	0.779242	1.05918	0.822771	1.03365	0.951898	0.368947	-0.476847	1.69662	0.484899	0.465182	-0.702801
379	3.27811	2.00744	1.98494	2.13572	1.61932	0.980687	1.0869	1.29033	1.61425	2.14347	1.67657	2.04337	1.53149	0.869678	1.6302	3.05389	1.98033	1.16057	1.94153	2.05277	1.70569	5.25498	2.32087	4.17252	3.1613	3.69385	4.24087	2.47642	2.59464	2.06523	3.29139	3.08632	2.96142	379	0.249925	0.342037	1.33129	0.514764	0.647148	1.13957	0.928648	0.698238	0.700988	0.453528	0.418875	1.4511	0.885011	0.669618	-0.597843
380	3.82895	2.02792	1.83779	2.59367	1.7409	1.24408	1.42992	1.05465	1.46769	1.81565	1.91559	1.86695	1.43521	1.07502	0.712507	2.68841	1.67676	1.29133	1.80292	1.38245	1.47812	6.10691	1.94131	3.96308	3.00776	3.73696	4.64827	2.55361	2.84341	2.08455	3.26072	3.3744	3.01173	380	0.498781	0.120446	0.573091	0.553829	0.7669	0.888402	0.973417	0.572568	0.789752	0.517153	0.620678	1.1044	0.70591	0.544128	-0.329878
381	3.59585	1.74983	2.09533	2.37435	1.64879	1.46713	1.2665	1.34939	1.25814	2.13248	1.27787	1.75259	1.45186	0.933092	1.5314	3.15743	1.91538	0.792646	1.34191	1.57333	1.71519	6.12409	2.38039	3.61911	2.96202	3.4526	4.33082	2.59352	2.72779	1.97814	3.33688	3.77546	3.18077	381	0.343556	0.142476	0.214795	0.728284	0.347797	1.47899	1.14191	0.690659	0.537478	0.122677	0.974024	1.21677	0.0430733	0.117262	0.0266493
382	3.42922	1.90197	2.03584	2.14526	2.05529	1.81659	1.37846	0.674296	1.67418	2.36207	2.06117	1.39343	1.46521	1.28361	1.85154	2.87989	1.67725	1.15575	1.69895	1.62227	2.0256	5.84602	1.90144	3.70142	3.24046	3.97472	4.34826	1.9153	2.81531	1.95382	3.27968	3.38836	3.24346	382	0.659273	0.40631	0.576969	0.719822	0.935271	1.65471	0.884679	1.0502	0.884489	0.487153	0.374773	1.08697	-0.0855281	0.495789	0.815802
383	3.76275	2.22517	1.90592	2.52987	1.86357	1.53386	1.48357	1.06028	1.45189	2.25366	1.75646	1.99819	1.6885	1.24124	1.72473	2.66689	2.13437	1.10356	1.86096	2.07717	1.59388	5.57735	1.80209	4.34534	3.01631	3.40557	4.41345	1.81842	2.5305	1.97532	3.44254	3.6696	3.32571	383	-0.233621	0.147966	0.465458	-0.370144	1.34772	0.58949	0.679605	0.636035	0.679713	0.547862	0.36891	1.32989	0.5513	0.33882	0.285371
384	3.69863	1.99539	1.94304	2.85806	2.09814	1.58998	1.41416	1.30585	1.34247	2.18659	1.5997	1.65099	1.54269	1.29519	1.65702	2.62373	2.52891	1.17566	1.52624	2.57541	1.73137	5.5318	1.82421	3.42971	3.24274	3.68216	4.63219	2.21296	2.39598	2.09126	3.1034	3.52516	3.11918	384	0.517151	0.420517	0.671214	-0.234055	1.22185	1.1117	0.437518	0.468348	0.753566	0.510785	0.0395594	1.20967	0.353656	0.302901	0.265122
385	3.61509	1.69409	1.82614	1.99099	1.36371	1.41101	1.72657	1.56408	2.22251	2.33008	1.69024	1.78237	1.08312	1.26098	2.05713	2.4798	2.53751	1.39739	1.67151	1.69744	1.59944	5.61592	2.02001	3.88315	3.16973	3.85504	5.04669	2.52615	2.69522	1.78612	3.54123	3.31757	2.97085	385	0.305241	0.299417	0.663887	0.322762	2.11264	0.901904	0.814782	0.978826	0.949328	0.454739	0.833912	1.12376	0.802898	0.677433	0.00465918
386	3.43482	1.62812	2.06261	2.59552	2.03936	1.31407	1.4209	1.10599	2.17753	1.96808	2.03586	1.86084	1.22432	1.12206	1.74836	2.52904	2.22635	1.22268	0.845701	2.44416	1.2712	5.51192	1.5056	3.97649	3.74989	4.57209	4.71512	2.32802	2.97063	2.34155	3.35012	3.15465	3.17661	386	0.483559	0.194265	1.25309	0.762399	1.16749	1.18238	0.571082	0.775646	0.858658	0.629251	0.391126	1.35821	0.380755	0.524682	0.0686499
387	3.79439	2.01262	2.19002	3.00951	2.15533	1.13233	1.43916	1.27904	2.04969	2.22535	1.93508	1.93342	1.51171	1.14954	1.72811	2.38641	2.10783	1.19126	1.46705	2.16164	1.6869	5.15643	1.95191	4.0022	3.27195	4.20969	5.27375	2.55643	2.44556	1.84435	3.73853	3.49913	3.14227	387	-0.746614	0.207812	0.683132	0.302807	0.0546353	1.13842	0.174438	0.562972	1.01392	0.951278	0.653889	1.12919	0.542391	0.652639	0.0772399
388	4.3056	2.01488	2.07211	3.41637	1.95261	1.35802	1.64224	1.64582	2.14476	2.07753	2.06505	2.00175	1.02739	1.24198	1.48792	2.20983	2.13587	1.09559	1.913	2.04493	1.65051	5.53941	1.65903	4.24635	3.3705	4.14825	4.61917	2.32165	2.52754	2.21797	3.74625	3.51433	3.28333	388	0.294724	-0.0757115	0.587185	-0.125321	0.800555	1.38302	0.647772	0.385166	0.736588	0.562947	0.725177	1.07387	0.549245	0.563871	-0.438763
389	4.06811	2.03883	1.81708	3.19805	1.88409	1.47204	1.69913	1.36549	1.37967	2.09698	2.12608	1.21559	2.01944	0.952634	1.79724	2.57446	1.97952	1.12994	1.68918	1.17191	1.44219	5.32418	1.49384	3.95954	3.45997	4.12108	4.68902	2.65499	2.18654	1.86963	3.86527	3.47975	3.50702	389	0.155387	0.0857115	0.638138	0.523607	0.778556	0.637538	0.0611256	0.95941	0.8001	0.754083	0.459614	1.33919	0.312971	0.364731	-0.439433
390	4.19122	1.98279	1.99503	3.34637	2.06808	1.38085	1.54213	1.23651	1.40326	2.43306	2.46923	1.69806	1.46647	1.27198	1.5378	3.01202	2.004	0.646923	1.46717	2.25858	1.10682	5.49785	1.71743	3.86835	3.29673	3.75808	3.85318	2.3388	2.68466	2.27674	3.69919	3.3372	3.42166	390	0.633048	0.551064	1.27713	0.688261	0.682883	0.535355	0.551412	0.837445	0.499798	0.948071	0.733795	1.21195	0.527389	1.37845	-0.219605
391	3.83626	1.57033	1.97822	3.39434	2.07585	1.22506	1.38649	1.48015	0.533448	1.41357	2.18	1.23031	1.45046	0.918625	1.33	1.73514	1.91806	0.883705	1.88937	2.29845	1.14931	5.27912	1.28027	3.43695	3.36402	3.8603	4.79899	2.38231	2.60522	2.0058	3.95023	3.13725	3.22961	391	0.509972	0.0827894	0.49326	0.533789	0.734422	0.465739	0.440867	0.890923	0.616074	0.8079	0.780243	1.46948	0.613308	0.559672	-0.182115
392	3.87719	1.62934	2.22097	2.76218	1.65325	1.18449	1.25772	0.953518	1.3338	2.09476	1.69216	1.58366	1.13671	1.08981	1.7283	2.88007	2.14372	0.880304	2.14591	1.87765	0.720939	5.36477	1.86265	3.74873	3.182	4.18725	4.95585	2.34911	2.47312	2.05402	4.17425	3.1797	3.00662	392	0.0971095	0.490706	0.731866	0.555418	1.63737	1.20885	0.379568	0.927719	0.629489	1.13762	-0.137579	1.11496	0.282273	0.559804	0.101907
393	3.99563	1.78043	1.97327	2.60281	1.86748	1.45105	1.75916	0.634451	1.44979	2.27054	2.0057	1.87967	1.16882	0.916397	1.49209	2.54939	1.35529	0.707721	1.16541	2.50255	1.71638	5.4782	1.29341	4.05523	3.22647	3.90433	4.98776	2.36493	2.15277	1.77895	3.72654	2.8205	2.94773	393	0.280303	0.115908	0.210299	0.51255	0.388877	1.42934	0.126051	0.607302	0.567756	0.462918	0.0065066	1.07893	0.689733	0.700079	-0.259343
394	3.65718	1.68381	1.76355	1.67951	1.57624	1.44031	2.11367	1.26466	1.63502	2.21455	1.4312	1.31897	0.792737	0.85653	1.3769	2.69221	1.81553	1.0594	1.86223	1.87767	1.68029	5.88912	1.56187	3.98332	3.42057	3.77588	5.4252	2.50193	2.47289	2.17107	3.40664	2.73651	3.1687	394	0.421761	-0.169686	0.401168	0.732586	0.49061	0.967242	0.332098	0.67517	0.354338	0.697585	0.463327	1.28283	0.289003	0.289444	-0.21929
395	3.84813	1.19115	1.96636	2.86406	2.6508	1.75431	1.40217	2.0614	1.83086	2.10839	1.93498	1.63682	1.26369	1.05025	1.53511	2.26457	1.52982	1.00593	1.93363	2.18062	1.35266	5.56375	1.68672	4.21572	3.29377	4.27376	5.21905	2.72342	2.60341	2.02373	3.699	2.71162	2.83236	395	0.653139	0.132408	0.469606	0.396059	0.794759	1.43899	0.692293	0.828193	0.638188	0.906629	0.985913	1.01361	1.25192	0.70899	0.234241
396	3.80737	1.33646	2.08012	3.03772	2.42984	1.42029	1.55084	2.38111	1.69366	2.25204	1.92971	1.728	1.41041	0.742189	1.59678	2.24745	1.7439	1.06436	1.37591	2.12681	1.55047	5.58477	1.18891	3.30997	3.43631	3.73659	5.08427	2.77412	2.32347	1.83319	3.63629	2.96791	3.04282	396	0.581679	-0.358466	0.956045	0.68681	0.421873	1.29144	0.788412	0.621301	0.304842	0.597344	0.936536	1.07049	0.816339	0.534697	0.0746364
397	3.95703	1.66626	2.34655	2.79079	2.49504	1.78673	1.2261	1.99114	1.74555	1.9911	2.04315	1.17937	1.63755	1.10392	1.66366	2.61372	1.61917	1.12418	2.01528	2.30357	2.0936	5.97214	1.69534	3.55126	3.68225	3.68559	5.59535	2.62598	2.63053	1.4737	3.72592	3.21228	3.26771	397	0.384606	0.206473	0.77582	0.511472	0.630622	0.868648	0.771489	0.808028	0.681557	1.00613	1.13283	1.80984	1.18034	0.066154	0.0386767
398	3.82288	1.9883	1.94228	3.57086	1.79033	1.16802	1.93372	1.67847	1.33005	1.77676	2.03287	1.31399	1.59493	0.93113	1.73819	2.81199	1.44658	1.00102	1.26585	2.02488	1.88118	5.77492	1.83745	2.72842	3.31497	4.04295	4.66662	2.51582	2.55362	2.23362	3.75742	3.04132	3.75985	398	-1.18013	0.365006	0.499051	0.227407	0.536949	1.14922	0.750726	0.0954373	0.385259	0.785538	0.743888	2.07705	0.655962	0.252768	0.258313
399	3.83055	1.68801	1.72082	2.94936	2.09688	0.959462	1.01785	2.20987	1.63407	1.86215	2.14177	1.61032	1.70977	0.845939	1.30061	2.66371	1.58022	1.0897	1.51086	2.03588	1.48414	5.31852	1.51771	3.59583	3.19587	3.83154	4.5782	2.84271	2.4243	2.03699	3.22965	3.28484	3.59932	399	0.738243	0.0197357	1.17738	0.702181	0.617607	0.79747	0.719596	0.207179	0.397033	0.593046	0.441578	1.87225	1.04166	0.0587428	0.137576
400	3.7994	1.82204	2.82444	2.81439	2.22516	1.46613	1.149	1.58582	1.7087	2.1349	2.07215	0.307849	1.1852	1.09171	1.10959	2.55179	1.03061	1.14847	1.57612	2.34313	2.16223	5.97625	1.7481	3.64107	3.41237	3.87649	4.21191	2.64067	2.20446	1.84602	3.31074	3.11612	3.36519	400	0.544158	0.471935	0.863655	0.672522	0.4894	0.985235	0.924834	0.342505	0.626674	0.452628	0.878508	1.20732	0.814778	0.269747	0.417327
401	3.7067	1.88678	2.28482	3.45185	2.16451	1.53181	1.476	1.61252	1.49802	2.28636	1.89927	1.89254	1.91815	0.76429	1.63993	2.31443	2.07402	0.831901	1.90807	2.10953	1.72393	5.32321	1.08028	3.78431	3.18973	3.70298	5.04359	2.45177	2.58463	1.93461	3.25737	2.97058	3.53957	401	0.582494	0.123631	0.700281	0.287783	0.225934	0.987965	0.943047	0.941192	0.336584	0.711877	0.868403	0.495169	0.719437	0.0493706	-0.0288875
402	3.59409	1.70005	2.28229	3.05658	1.85365	1.47345	1.39561	1.72738	1.65747	2.29524	2.09988	1.59014	1.44204	0.877134	1.56374	2.29438	1.21637	1.14071	0.664548	1.91365	1.49169	5.38377	0.648218	3.97262	2.93178	3.90476	5.01499	2.37452	2.38646	2.1278	3.63592	3.22051	3.26627	402	0.141625	0.105342	0.804975	0.569528	-0.105902	1.00086	0.706793	0.64178	-0.0381407	0.546266	0.702854	0.501195	0.729683	0.102534	0.319777
403	4.03863	1.53962	1.78004	2.32032	2.20183	1.29721	1.52413	1.82928	1.78003	1.84719	2.12901	1.48798	1.72243	1.33094	1.29992	1.72028	1.29708	1.24016	1.52346	1.95728	1.93216	5.80176	0.691045	3.53037	3.04989	3.92735	4.97299	2.68516	2.52234	2.31767	3.43091	3.19009	3.29069	403	-1.06385	0.245746	1.03343	0.664772	-0.402239	1.0993	0.471058	0.973359	0.28227	0.555407	0.358109	-0.0953486	0.471647	-0.103527	-0.0322822
404	3.82816	1.41367	1.97204	2.80525	2.25587	1.3238	1.60461	1.70661	2.00426	2.27701	2.31957	1.33775	1.56694	0.995147	1.77589	1.94791	1.88969	0.951824	1.69183	2.28447	1.92472	5.93358	1.4386	3.78503	3.39114	4.27397	5.15155	3.12206	2.33522	2.219	3.2897	3.20115	3.13227	404	0.701019	0.111178	0.770698	0.58887	0.298161	0.542231	0.0484285	0.385226	-0.210396	0.544768	0.348563	0.461382	0.869434	-0.578785	0.811579
405	3.92935	1.6083	1.97406	2.96764	1.86139	1.52298	1.41354	1.81113	1.74249	2.16752	1.95707	1.36539	1.74683	1.10103	1.46125	1.73912	1.44154	1.54955	1.99581	2.81715	1.92832	5.46589	1.04251	3.74972	3.59011	3.7057	5.02944	2.73793	2.81284	1.77114	3.55406	4.43988	3.43541	405	0.370864	-0.36957	0.9997	0.604083	0.231314	1.27698	0.985192	0.929284	0.810611	-0.0543153	0.416726	0.259682	0.626529	-0.270329	0.449155
406	3.90811	1.57957	2.23497	3.1791	1.48153	1.75626	1.51197	2.04835	1.72009	2.11661	2.15799	1.59749	1.64095	1.01438	1.45695	2.36206	1.54241	1.2231	1.78068	2.65287	2.25633	5.70284	0.997938	3.6635	3.47094	3.94666	4.84946	2.35593	2.62324	1.20619	3.58877	4.17585	3.21959	406	0.449557	0.412335	1.10671	0.621	0.60725	1.36896	0.304664	0.963781	0.774192	0.232777	0.972162	0.803887	1.1894	-0.397259	0.0756371
407	3.79162	2.13896	2.46289	3.1154	2.11484	1.79106	1.13679	1.60695	1.50819	2.33063	1.85315	1.59994	1.45545	1.05777	1.31463	2.23915	1.90503	1.42002	1.24446	2.9102	1.73131	5.31556	0.920829	3.77267	3.4304	3.64982	4.63977	2.72138	2.66764	1.85138	3.61107	3.85554	3.38472	407	0.820492	-0.200367	0.581429	0.424333	0.11517	1.07077	0.946328	0.515604	0.905034	0.557803	0.895368	0.771585	0.681889	0.0914902	0.0147108
408	3.99882	1.62966	2.08637	2.96788	2.67382	1.66985	1.44345	1.4103	1.25736	2.07195	2.01703	1.63579	1.69168	0.814713	1.72032	2.77988	1.59621	0.76536	1.65179	2.52629	1.64586	6.099	0.998112	4.12562	3.71376	4.13264	5.1434	2.54472	2.97288	1.93841	4.17412	3.36721	3.09252	408	0.333006	0.475561	0.000774137	0.683753	0.373933	0.874352	0.756167	0.627521	0.956888	0.120961	0.625887	0.826913	1.13085	0.0658238	0.280347
409	3.9584	1.61135	2.0925	3.24862	3.54701	1.58329	1.60248	0.795487	1.24385	1.94776	2.16857	1.5618	1.51908	1.01029	1.36535	2.21198	1.5536	1.10878	2.06327	2.14394	1.6591	5.50492	1.22174	3.86671	3.93374	3.89934	5.12692	2.73389	3.409	2.04854	4.2029	3.37069	3.23802	409	0.554921	0.254518	0.339046	0.589154	0.333487	1.109	0.875565	0.954848	0.882257	0.51975	-0.0108398	0.767212	0.669359	0.0283828	0.65736
410	3.78904	1.54127	2.06111	3.35638	3.42228	1.48419	1.35341	1.43899	0.819753	1.88868	2.0356	1.71698	1.80036	0.977677	1.40523	2.55882	1.30891	1.09164	1.5842	2.60005	1.73984	5.88044	1.02913	4.03012	3.42928	3.74855	5.1777	2.7647	2.65936	1.72725	3.9447	3.47216	3.34082	410	1.07644	0.0334548	0.620305	0.560402	0.454566	1.1311	0.758791	0.86266	0.791432	0.400513	1.3187	0.42069	0.465127	-0.219149	0.315562
411	3.9568	2.52462	1.97522	3.03568	3.02023	1.577	1.55793	1.88278	1.39944	2.27002	2.0819	1.57191	1.19305	0.699827	1.44569	2.50188	1.5275	1.48409	2.07911	2.25749	1.71944	5.76516	1.10057	3.81325	3.13555	3.97	5.10432	2.72965	2.97022	1.93843	3.85608	3.80773	3.18262	411	0.361595	0.350214	0.278467	0.852525	0.138479	0.951469	0.762363	0.758485	0.726951	0.490048	1.10185	1.04703	0.581068	0.0270325	0.886793
412	4.03696	2.34011	2.33936	3.48557	2.27233	1.57147	1.79945	1.32654	1.81405	2.44122	1.52855	1.16853	1.38821	0.967716	1.37037	1.92529	1.72508	1.06111	1.41669	2.3301	1.80891	5.85796	1.11053	3.44192	3.14736	4.35315	4.48	2.75835	2.80761	2.11287	3.26507	4.61894	2.99605	412	0.348957	0.337384	0.522378	0.934935	0.502057	1.17681	0.644636	0.672431	0.91243	0.486929	1.09461	0.798808	0.64077	0.215882	0.524584
413	3.42983	2.4321	2.10046	3.30865	2.18258	1.49497	1.29636	1.59477	1.38102	2.01388	2.03449	1.1665	1.67033	0.951023	1.55136	1.86477	1.6208	1.16275	1.66074	1.63177	2.11239	5.81748	2.46335	4.22645	3.08605	3.87438	4.3095	2.86637	2.61667	1.74275	3.0091	4.15313	3.16199	413	0.817405	-0.0870178	0.386311	0.619097	1.09223	0.735209	0.760765	0.321559	0.256158	0.111475	-0.155566	0.809448	0.48832	0.309232	0.54997
414	3.7	2.3771	1.99342	3.25122	2.16928	1.55776	1.42777	1.15181	1.31219	2.1211	2.21942	1.58961	1.99976	1.31087	1.42526	2.15844	1.6768	1.04244	1.42201	2.12291	1.63387	5.6261	1.31514	4.49235	3.61815	3.65001	4.49304	2.48872	2.82625	1.85039	3.23719	3.73098	2.9057	414	0.390547	-0.0107817	0.830753	0.772886	0.922679	1.38094	0.740882	0.789629	1.02379	0.516263	0.52786	1.01475	0.697999	0.621975	0.780612
415	3.27216	2.56534	1.68092	3.28881	1.98938	1.33137	1.31241	1.50556	1.25245	2.38546	1.97008	1.46714	1.50755	0.930262	1.42168	2.51446	1.82209	0.63522	2.05643	2.40226	1.52936	6.12943	1.01389	3.8719	3.11543	3.40752	4.36672	2.77073	3.11037	2.28925	3.31898	3.6863	3.22489	415	0.789663	-0.166709	1.0226	0.731302	0.360521	-0.0424251	0.567383	0.46884	1.18749	0.270049	0.500107	0.952074	0.480833	-0.0653989	1.07372
416	3.90337	2.32234	2.06678	2.8917	2.25748	1.3434	1.68535	1.58885	1.19795	1.92637	2.19616	1.56263	1.28855	1.1352	1.70469	2.52796	1.49014	1.37847	1.58425	2.07997	1.64186	5.23933	1.2308	3.58858	3.34919	3.49298	4.92672	2.77795	2.86355	1.91006	3.28126	3.52495	3.33784	416	0.310104	0.310665	0.898521	0.643363	0.740051	0.630557	0.228416	0.627138	0.899132	0.677591	0.444283	1.03543	0.341145	0.0121679	0.818315
417	3.74844	2.41991	2.1009	3.22003	2.56936	1.61601	1.82336	1.28839	1.62401	2.17553	2.11483	1.48441	1.74451	1.29623	1.4642	2.35094	1.96278	0.696213	1.87769	2.54499	1.75731	4.22922	1.07246	3.86234	3.28765	4.00158	4.22982	2.89857	2.9026	1.98647	3.4122	3.42597	3.16499	417	0.472288	0.0316377	0.956154	0.489399	0.555336	1.04064	0.150605	0.29836	0.372295	0.539086	-0.329619	0.818378	-0.28354	0.769588	0.771196
418	3.84413	2.18758	1.66063	2.12111	2.2877	1.19166	1.5015	1.94566	1.83385	2.10848	2.12241	1.27177	2.14759	1.23484	1.53897	2.26658	1.44824	0.99042	1.87395	2.50955	2.23993	5.12651	1.39465	4.28607	3.15005	3.94789	4.33285	2.78029	3.49256	2.54254	3.38159	3.4388	3.19848	418	0.834421	0.00395117	0.561406	-0.00254093	0.601506	0.883458	0.651595	0.821639	0.76231	0.595547	-0.427639	0.826733	0.188485	-0.0505555	0.643059
419	3.78814	2.2682	1.46553	1.9937	2.54711	1.32848	1.54314	1.70316	1.45047	1.78743	2.0704	1.15607	1.05835	1.00116	1.15997	2.24889	1.83924	1.06891	1.30666	1.83635	1.98901	5.84408	1.36536	4.16528	3.25807	3.6762	4.39468	2.79497	2.8107	2.15009	3.50839	3.95098	3.38984	419	0.661023	0.428102	1.36142	0.47606	0.257941	1.24631	0.187166	0.588357	0.855645	0.342466	0.561	0.93589	0.606532	0.283442	0.616949
420	3.52861	2.56965	1.49286	2.08456	2.54104	1.44364	1.29672	1.47919	1.42539	2.02347	1.6051	1.68302	1.15835	0.91367	1.57483	2.41608	1.45126	1.13001	1.47738	2.02183	1.98626	4.95767	1.22957	3.88393	3.3937	3.65275	4.70219	2.04568	3.05834	2.00742	4.02204	3.80908	3.1271	420	0.796595	0.110848	0.935199	0.795486	0.800006	0.699855	0.701257	0.382891	0.579581	0.40411	-0.356509	0.827598	0.167303	-0.24391	0.391374
421	3.83544	2.25454	1.58938	2.59833	2.21471	1.47807	1.58524	2.02809	1.28271	2.23602	2.15099	1.63808	1.37317	1.15596	1.64116	2.21291	1.72793	0.659794	1.97497	2.16894	1.7626	5.14413	1.49468	4.20481	3.29312	3.96893	4.61075	2.03634	2.54904	2.03292	3.96837	3.65034	2.86447	421	-0.435213	-0.0794329	0.897292	0.976247	0.639423	1.34572	0.45465	0.211101	0.469897	0.25484	0.295959	0.816444	-0.08845	-0.157352	0.00593329
422	3.76819	2.00604	1.49829	2.22113	2.37081	1.45469	1.73009	1.92325	1.7	2.02375	2.14569	1.1695	1.62306	1.37761	1.42038	1.86624	1.69343	1.00197	1.48873	1.69388	1.8621	5.207	1.09657	4.37204	3.2112	3.70942	4.79304	2.05212	2.38132	2.52643	3.63568	3.17156	3.09417	422	0.447148	0.14843	1.30808	1.01529	0.17882	0.992988	0.22414	1.03801	0.263186	0.439611	0.0823718	0.628433	0.343836	0.378399	-0.315795
423	3.74136	1.9117	1.65047	3.28727	2.47572	1.61894	1.65465	1.61463	1.27027	1.89419	1.55203	1.64676	1.73014	1.08127	1.38244	2.52419	1.82922	0.914389	2.03997	1.71754	1.94887	4.88556	0.82293	4.2739	3.27706	3.04344	5.02757	2.19759	2.66761	2.30043	3.756	3.34836	2.94598	423	0.752683	0.0282511	1.83343	0.794285	0.554576	1.32141	0.869035	0.750073	0.772774	0.267488	0.400651	0.645001	0.563428	-0.0189114	0.187842
424	3.75435	2.12278	1.33271	3.06102	2.6111	1.39488	1.61691	1.80865	1.67517	1.73405	2.19676	1.45522	1.45915	0.975783	1.45295	2.06951	1.90871	0.624506	1.73359	2.66646	1.77264	4.68881	0.823858	4.39713	3.19359	2.78342	4.93951	2.30597	2.67476	2.46493	3.52176	3.49847	2.84476	424	0.577588	0.199167	1.60224	0.758719	0.606857	0.840549	0.709587	0.901573	0.154868	0.0815176	0.338799	0.776254	0.673086	0.160353	-0.174554
425	3.65345	2.1261	1.45032	3.47892	2.02534	1.44263	1.33056	1.59258	1.63785	2.36061	2.07368	1.45323	1.29058	0.860376	1.11481	2.25389	1.44149	0.841971	1.91574	2.6398	1.84281	4.62764	0.658228	4.18496	3.08105	3.05738	4.9205	2.65637	2.61684	3.01535	4.20957	3.46373	3.0241	425	0.692095	0.376676	1.31703	0.934701	0.861262	1.02325	0.535188	0.70437	0.562204	0.0275042	0.508299	0.604498	0.111944	0.122148	0.100273
426	4.29189	2.37212	1.11959	3.09485	2.42246	1.42743	1.3745	1.68955	1.48155	1.7335	2.03066	1.38633	1.23969	1.39276	1.57567	2.26564	1.7112	1.14617	0.81665	2.29242	2.33255	4.67161	1.26088	4.13135	3.27466	3.32294	4.8723	2.89677	2.52297	2.86	4.73853	3.59419	2.53195	426	0.769306	0.22715	1.02945	0.958101	-0.0555582	0.895356	0.515487	0.597376	0.566308	-0.122921	0.0152111	-0.43686	0.562469	-0.671082	0.954536
427	4.52327	2.18498	1.41339	3.53778	2.49762	1.24187	1.64552	1.44188	1.86538	2.27195	1.97682	1.6764	1.54346	0.870954	1.59707	2.17686	1.82094	1.56348	1.5029	2.28239	1.34604	4.43159	1.09831	3.61894	3.18181	3.37614	5.14951	2.4935	2.85955	2.82427	4.64793	3.74128	2.52479	427	0.875744	-0.317766	1.45359	0.554067	0.00739468	1.16442	0.844593	0.627016	0.685826	0.227738	0.332161	-0.0919091	0.0790442	-1.6428	0.654267
428	3.97218	1.68115	1.62962	3.64286	2.45104	1.16433	0.654567	1.74993	1.94181	2.14542	2.04249	1.208	1.80831	1.03604	1.09841	2.12049	1.80776	1.0654	1.61649	2.33422	1.96132	5.11207	0.698414	3.98472	3.39112	4.06506	5.47144	2.54204	2.53873	2.91697	4.23694	3.37804	2.46585	428	0.837714	0.181797	1.26331	0.773594	0.642232	0.486002	0.686965	0.867754	1.11429	-0.378891	0.31427	0.279234	0.141789	-0.670476	0.403935
429	3.73005	2.04136	1.19095	3.2807	2.42323	1.08563	1.34675	1.67551	1.60224	2.13611	1.88034	0.975576	1.39986	1.32222	1.03249	2.48763	1.37783	1.11213	1.77806	1.19839	1.50822	5.26878	0.535606	4.35919	3.36345	3.67661	5.60774	2.50122	2.5478	2.5006	4.03776	3.3611	2.39057	429	0.271965	-0.295928	1.32607	0.676118	0.0251608	0.948703	0.699421	0.720128	1.29962	-0.0132126	0.468328	0.340426	0.0641659	-0.821613	0.41042
430	4.4273	1.80814	1.52679	3.73653	2.32242	1.60486	0.800557	1.63504	1.92469	2.28385	2.16597	1.70376	1.28888	1.1701	1.07431	2.63676	1.56207	0.947216	1.77714	2.34772	1.686	4.57277	1.06906	3.78297	3.03605	3.6276	4.64208	2.65551	2.77763	2.76216	3.99873	3.36539	2.45499	430	0.456697	0.247854	1.49681	0.429778	0.435563	1.14098	1.18588	1.10207	0.559084	0.321346	0.0478088	0.0372558	0.080694	0.00851184	0.236205
431	3.72386	2.37992	1.50098	3.34538	2.04675	1.53831	1.4427	1.47818	1.57762	1.6996	1.94378	1.81454	1.33318	1.38006	0.886391	2.36952	1.49886	0.663445	1.75588	1.90216	1.69653	4.61795	0.814296	4.36661	3.72559	3.80394	4.85049	3.13811	2.62878	2.68395	3.77621	3.33973	2.93729	431	-0.0777079	0.153961	1.02259	0.622244	0.631842	0.920075	0.748837	1.10318	0.844196	0.159408	0.255305	0.310981	0.394764	-0.784915	0.101604
432	3.96614	2.09055	1.55416	3.04528	2.49861	1.31804	1.41665	1.58076	1.80825	1.95711	2.02575	1.60364	1.20443	1.04574	1.05038	2.73488	1.77643	1.1029	1.84361	2.44837	2.14273	5.10641	1.01826	4.35153	3.65468	3.61741	4.46623	2.82812	2.60036	2.50031	3.72783	3.61606	2.47357	432	0.0954939	0.217778	1.16666	0.752624	0.577848	0.787837	1.30997	1.17437	1.15238	0.416243	0.816057	0.837769	0.116881	-0.698636	0.660787
433	3.90912	1.99202	1.45645	3.07106	2.22615	1.33396	1.04263	1.67747	1.53875	2.13142	1.97698	2.11873	1.22465	1.71311	1.09311	2.04314	1.99621	0.551865	1.97263	2.70428	1.7513	4.62369	0.771637	4.04809	3.40484	4.03079	5.11607	2.67585	2.43652	2.52588	3.41826	3.57444	2.67592	433	0.831362	-0.130819	1.06	0.814612	0.842184	0.977754	0.814856	0.755655	1.03957	0.186966	0.878479	0.712554	0.459254	-0.518517	0.078163
434	3.94261	1.91981	1.50589	2.99074	2.51623	1.70821	1.55291	1.65441	1.5393	2.30827	1.91382	1.82603	1.20095	1.58198	1.02924	1.44635	1.82877	0.562232	1.53578	2.7688	1.50385	4.18267	0.59342	4.23516	3.83618	3.57446	4.78228	3.36479	2.63054	2.15975	3.30558	3.35582	2.5585	434	0.50049	0.520935	0.916944	1.01763	0.795199	0.959912	0.713655	0.960893	0.480989	-0.027925	0.607568	1.03101	0.740541	-0.407419	0.102927
435	3.36909	2.20645	1.02043	3.57959	2.03855	1.26881	1.07449	1.67768	1.49037	2.36621	2.26581	2.20623	1.36625	1.38302	1.17347	1.76009	1.6968	1.12745	2.07139	1.74086	1.74192	4.9035	0.763521	4.57208	3.7411	3.28671	4.55375	3.14353	2.65107	2.2884	3.59083	3.32715	2.63136	435	0.121247	0.434439	0.909202	0.874245	0.160715	0.838526	0.834426	1.19785	0.781908	-0.00175331	-0.443028	0.923948	0.340985	-0.651943	-0.520388
436	3.65494	2.06558	1.42462	3.61156	2.23544	1.4037	1.26237	1.67097	1.40423	2.04386	2.27351	1.78714	1.63996	1.26434	1.00647	2.05245	1.6801	1.19447	2.18059	2.54207	2.40698	4.50363	0.672132	4.23772	3.96793	3.94635	4.88059	2.24467	2.69518	2.75844	3.52933	3.32557	2.68972	436	0.576177	0.364603	0.838051	0.47123	-0.461591	1.13189	0.716907	0.990449	0.884111	0.0838412	0.017359	1.21339	0.414491	-0.453861	-0.139914
437	3.62353	2.33622	1.19288	3.45464	2.69679	1.27492	1.22834	1.78267	1.40159	2.31981	2.32779	1.60736	1.69861	1.29592	0.978928	2.18835	1.99774	0.831006	1.90632	2.448	2.01039	5.31987	1.03585	3.64536	4.33807	4.08246	4.78318	2.35666	2.44869	2.48217	3.74075	3.28877	2.70213	437	0.0962788	0.47373	0.464825	0.946203	0.248672	0.694822	0.449351	0.896893	0.523505	0.373295	0.266955	0.396206	0.541149	0.00154842	0.0347656
438	3.88113	2.11684	1.49694	3.23168	2.37093	1.24152	1.3287	1.68815	1.86887	1.88414	2.32581	1.66186	1.36699	1.45573	1.41124	2.08221	1.83785	1.07088	1.95833	1.61992	1.83991	4.85706	0.772236	3.80468	4.13946	3.7266	4.69404	2.4252	2.42318	2.59531	4.02559	3.46147	2.69121	438	0.590268	0.129986	1.12741	0.70212	0.325061	0.735985	0.616571	0.706345	0.683953	0.331312	-0.768386	0.439484	-0.400816	-0.0210463	-0.111551
439	3.9944	2.33742	1.48857	3.94415	2.80087	1.47455	1.21291	1.65775	1.40397	2.34419	1.95781	1.92052	0.734076	1.24134	1.14032	1.9176	1.25967	1.10411	1.21744	2.20471	1.86435	4.16515	0.489713	4.1781	3.68177	4.15535	4.37079	2.3875	2.56254	2.66737	3.89313	3.21417	2.81665	439	0.309847	0.286407	0.451176	0.586943	0.0368805	-0.319072	0.975529	0.429273	0.415903	0.219396	0.0424239	0.39235	-0.626004	-0.766973	-0.137792
440	3.47348	1.9512	1.4899	3.61389	2.86548	1.5116	1.16916	1.71456	1.71441	2.15171	2.18204	2.21186	0.99582	1.51944	1.0147	2.21898	1.82499	0.588538	1.89808	2.28858	1.80407	4.31197	0.808666	4.24826	3.79126	3.62906	4.20356	2.58521	2.64759	2.37781	3.82221	3.37908	2.616	440	0.654513	0.307176	0.234913	0.601006	0.648912	0.510845	0.901584	0.471604	0.720595	0.394405	0.336012	0.640703	0.303322	-0.217226	-0.290736
441	3.89573	2.32638	1.53936	3.641	2.39329	1.52738	1.89288	1.6683	1.49878	1.87038	1.71471	1.62536	1.14446	1.30516	1.02248	2.10445	1.65398	1.25384	1.83128	1.83838	1.77236	4.47796	0.626197	4.20296	3.52376	3.63883	4.76638	2.88855	2.5006	2.49228	3.97918	3.31814	2.70421	441	0.273882	0.639004	0.612956	0.61321	0.232752	1.00028	0.838827	1.12666	0.289628	0.198954	0.285434	0.644078	0.0684173	-0.212432	-0.467796
442	3.61875	1.95541	1.81039	3.38928	3.41891	1.38192	1.36556	1.8702	1.40457	2.1817	2.27916	1.97225	0.970025	1.02348	0.882824	1.47836	1.56576	1.50541	1.54049	2.52236	2.06866	5.09876	0.162886	4.48681	3.82329	3.95564	4.70066	2.89937	2.70037	2.34658	3.91059	3.3444	2.80681	442	0.547324	0.678189	0.763509	0.613466	0.378523	0.833013	0.163085	1.47105	0.351596	0.304219	0.567817	0.989525	0.765049	-0.374301	-0.44126
443	3.59281	2.22014	1.57939	3.57189	2.73976	1.52166	1.61455	0.910695	1.53541	1.72333	2.20756	1.46969	1.50015	1.21959	1.04848	1.5427	1.30337	0.751501	1.30963	2.02861	1.85181	5.13724	0.590085	3.85457	3.68904	3.83256	5.39874	3.02379	2.61435	2.70597	3.89685	3.33417	2.63347	443	0.378017	-0.870472	0.543034	0.904438	0.73736	0.660731	1.32518	1.17498	0.538588	0.0379217	-0.281189	0.515534	0.0839519	-0.143071	0.13702
444	4.40095	1.93484	1.25035	3.58864	2.57661	1.32853	1.68872	1.54553	1.41294	2.14086	2.24499	1.80107	0.969646	1.18201	0.956554	1.46296	1.52125	0.873356	1.42627	2.34219	1.63867	4.48503	0.807843	3.18529	3.51696	3.79545	5.35456	2.90139	2.34714	3.17608	4.16556	3.20708	2.59599	444	0.541519	0.346604	0.893901	0.0507348	0.726056	0.685479	0.787152	0.973357	0.640163	0.133398	0.247025	0.817651	0.196436	-0.750751	-0.235605
445	4.43984	2.18917	1.64284	3.34875	2.7251	1.43185	1.05803	1.54451	1.59221	2.01025	2.18836	1.81844	1.58431	1.30185	0.517616	2.38564	1.57064	0.840715	1.83758	2.64501	1.73945	4.68155	0.427716	3.7991	3.63923	3.87378	5.09378	2.82873	2.73817	3.42465	3.78803	3.1389	2.54256	445	0.656744	0.0095654	0.757834	0.664483	0.620879	1.20798	0.732892	0.928592	0.511142	0.201178	0.125022	0.952396	0.0695736	-0.251809	-0.0295556
446	4.43194	1.98883	1.40308	3.92677	2.2577	1.51586	1.15385	1.59504	1.71082	2.03182	1.74045	1.84139	1.31449	1.59682	0.986988	2.16946	1.10724	1.18981	2.1167	2.89832	1.83975	4.7295	0.402536	4.41668	3.30243	3.46448	5.79396	2.6369	3.27613	3.22691	3.67573	3.11679	2.51728	446	0.504616	-0.125838	0.707245	0.43976	0.286391	1.29358	0.338605	1.3822	1.09361	0.144954	0.683254	0.75462	0.243383	-0.497558	-0.222433
447	4.46983	2.10971	1.70444	3.57524	2.24076	1.0902	1.16721	1.34506	1.5424	2.04861	2.44643	1.73574	1.50058	1.7787	0.209296	1.77024	1.2531	0.787826	2.21775	2.25643	1.92626	5.01882	0.577308	3.87922	3.7574	3.74821	5.32009	2.57792	3.13182	3.14185	3.75603	2.96446	2.60743	447	0.729304	0.314548	0.988066	0.639793	0.761389	0.997486	0.756004	0.558304	1.42128	0.609123	0.290259	0.485316	0.284476	-0.608138	0.160057
448	4.12258	1.82728	1.791	3.30327	2.3891	1.08048	1.91545	1.49751	1.42472	2.07132	2.18736	2.07902	1.15403	1.66074	0.675152	1.9669	1.92092	1.06257	1.95483	2.99662	1.85856	4.94296	0.338258	4.39019	3.5299	3.97817	4.93869	3.23803	2.4249	2.78144	3.66404	3.06485	2.36406	448	0.176587	0.527172	0.938721	0.477931	0.943693	1.19695	1.12673	1.18655	1.25641	0.509535	0.0804783	0.716984	0.280744	0.0753715	0.00379611
449	4.05971	1.77447	1.65957	3.63933	2.66625	1.15976	1.79902	1.62595	1.63919	2.12914	1.72805	1.83403	1.2315	1.62396	0.983294	1.76007	1.09338	0.934113	1.75157	2.59663	1.31331	4.69052	0.843205	4.36372	3.40362	4.00156	5.38037	2.43741	2.62112	3.14985	3.67202	3.11206	2.34233	449	-0.274187	0.417954	0.754174	0.502725	1.09245	1.11242	0.741986	1.07396	0.713133	-0.296046	0.436578	0.707618	0.271924	-0.582068	-0.458784
450	4.27359	1.74145	1.38187	3.65166	2.7935	0.933352	1.64783	1.71157	1.31968	2.12435	2.14174	1.45227	1.43067	1.68412	1.00516	1.64934	1.42985	0.797073	1.88046	2.78164	1.61763	4.2351	-0.0170524	4.38138	3.38468	3.85306	5.07664	2.85789	2.86925	3.12969	4.23939	3.41246	2.35212	450	0.403531	0.231792	0.533263	0.722804	0.76138	1.22504	0.617072	1.0263	1.14872	0.167428	0.256219	0.605513	0.281017	-0.197617	-0.3592
451	4.15456	2.13416	1.26056	3.38764	2.92228	1.48493	1.51393	1.79381	1.19467	2.31006	2.1967	2.09738	1.44135	1.19452	1.01161	2.15885	1.5974	0.83016	2.03848	2.37202	1.84909	4.65849	0.892974	4.33897	3.55297	3.60056	4.64859	2.6223	3.17196	2.98969	4.33012	3.27801	2.15945	451	-1.32698	-0.655978	0.735613	0.34249	0.412018	0.911798	0.962458	0.566463	0.927428	0.136565	-0.278687	1.00686	0.560826	-0.783005	0.455102
452	4.38225	1.93903	1.53898	3.81052	3.33111	1.59474	1.584	1.984	1.58984	2.27919	2.47176	1.54556	1.6479	1.14501	0.843655	1.52172	1.50775	0.76846	1.79669	2.35566	1.85537	4.67921	0.713409	4.96522	3.70146	3.21046	4.82221	2.847	2.83637	2.91981	3.64604	3.75381	2.34996	452	-0.431059	0.122883	0.668828	0.707805	1.40441	0.934829	0.966574	1.11936	0.850408	0.259655	0.025687	0.814083	-0.297161	0.148675	-0.066738
453	3.94393	2.29369	1.53951	3.81845	2.88876	1.21724	1.78208	2.11942	1.33555	2.38226	2.01166	1.35267	1.24156	1.09639	1.17246	1.95464	1.22466	0.769665	1.58248	2.2082	1.95029	4.86289	0.13486	4.54962	3.15624	3.31109	5.21016	2.57808	2.72	3.19243	3.51785	3.61368	2.69021	453	0.161926	0.00941869	1.06665	0.323819	1.21759	0.769	0.250664	0.49336	0.699332	0.315969	0.588374	0.513177	-0.690326	-0.589312	0.232676
454	4.14674	2.71213	1.70762	2.36234	2.83294	1.55316	1.84768	1.79017	1.58016	2.52946	1.77907	1.82635	0.927036	1.33643	1.0854	2.3751	1.81409	1.0973	1.63774	2.0136	1.97456	4.09042	0.642302	4.78421	3.0378	3.16093	5.27835	2.9769	2.70888	2.72081	3.76866	3.19937	2.49583	454	0.257039	0.240879	0.829757	0.489269	1.11416	1.50406	1.0091	0.660533	0.906907	0.289067	0.536775	0.768535	-0.0941932	-0.653012	0.556997
455	4.14388	2.7114	1.10463	2.86312	2.53813	1.2098	1.48682	2.16683	1.5453	2.42285	2.14009	1.61481	0.999978	1.1131	1.01252	2.18857	1.76474	0.872214	1.33045	2.39857	2.29483	5.05466	0.105784	4.21671	3.21196	3.39369	4.96452	2.82685	2.84539	2.75332	3.64388	3.5809	2.14835	455	0.2391	0.253415	0.754698	0.539242	1.03307	0.953881	0.697407	0.701633	0.461312	0.22734	-0.347272	0.984466	0.11692	-0.789947	0.245437
456	4.11333	2.14184	1.59803	3.18215	1.68795	1.25512	1.98959	2.29077	1.31306	2.03751	1.8202	1.45756	1.47779	1.29104	1.06053	2.05534	1.60699	0.720981	1.18859	1.71448	1.90952	4.57559	0.404675	3.95184	3.08034	3.48757	5.3649	3.14023	2.94846	3.04644	4.15156	3.32651	2.15763	456	-0.396006	0.515898	0.80301	0.436877	1.62762	1.07418	1.21385	0.720939	0.945108	-0.148558	-0.685026	0.98644	0.0446448	-0.514517	-0.185559
457	3.81558	2.24404	1.21419	3.96201	2.48526	1.45824	1.4953	1.97923	1.50631	2.11688	2.06416	1.55637	1.28402	1.12647	1.16698	2.32653	1.23664	0.843219	1.62043	2.08853	1.76488	4.97761	0.945921	4.81381	3.068	3.58367	4.61795	2.79476	3.02635	2.81678	4.02745	3.1854	2.39069	457	0.438811	-0.124661	0.80603	0.304531	1.26211	0.99894	1.05027	0.819352	0.466715	-0.0524751	-0.220982	1.04457	0.369366	-0.828441	-0.897178
458	4.24925	2.40592	0.7557	4.05297	2.44966	1.23532	1.64082	2.07508	1.5387	2.01415	1.99259	0.96763	1.5434	1.08332	0.953953	1.84842	1.64907	0.630579	1.66304	2.38613	1.60771	4.56598	1.35816	4.4457	3.28045	4.01932	4.92986	2.5636	2.67983	2.84855	3.85939	2.68832	2.35194	458	0.367632	0.272326	1.02499	0.431791	1.18746	0.73994	0.878214	0.680054	0.899549	-0.240547	0.140481	0.753235	0.336547	-0.277765	-0.720052
459	4.34287	2.43786	1.13846	3.74905	2.22399	1.19436	1.56744	1.71711	1.41636	2.41814	1.81016	1.59741	1.60414	1.32515	1.07423	2.48563	1.57728	1.15616	2.17848	1.90538	1.45406	4.64414	1.04288	4.45437	3.62668	4.34135	5.17819	2.81055	3.03191	3.01327	3.89807	2.86968	2.32433	459	0.475459	0.42607	0.984312	0.700747	1.17868	0.85693	1.08155	0.597184	0.697969	-0.271587	-0.0112792	0.483652	0.502422	-0.331099	0.288187
460	4.40834	2.30159	0.514844	3.97979	2.56429	1.36146	1.4772	1.47267	1.38853	2.19048	1.80835	1.37799	1.59886	1.16473	1.12959	1.75044	1.76555	1.18141	1.41297	1.75639	1.81787	4.89154	1.31036	3.88189	3.5914	4.31137	4.51079	2.79298	2.63345	2.40138	3.67298	3.06288	2.39609	460	0.340936	0.460349	1.19118	0.5994	0.435829	1.22797	1.06531	0.604796	0.596696	-0.431366	0.54219	0.663818	0.113779	-0.541338	-0.441958
461	4.40177	2.25321	0.909654	3.87274	2.48462	1.34158	1.67967	1.30436	1.67401	2.15799	2.33521	1.56859	1.16729	0.985204	1.41634	2.07712	1.74653	1.05175	1.43256	2.18565	2.30796	5.61493	1.13402	4.06773	3.41201	4.1371	4.8488	2.25369	2.21418	2.61767	3.75511	3.26448	2.69847	461	0.0164816	0.23738	1.12883	0.648267	0.804439	1.25804	1.22524	0.779366	0.231442	-0.347319	0.0467846	0.851681	-1.51738	-0.309746	0.071763
462	4.14347	2.2871	1.13326	3.97634	2.53693	1.33429	1.81071	1.81799	1.72365	2.40194	1.86426	1.32972	1.20896	1.16442	0.978623	2.16664	1.61905	1.05414	2.07474	1.95371	2.19021	5.31123	1.12566	3.90698	3.33583	4.74544	4.79837	2.56896	2.46173	1.99716	3.57572	3.00755	2.60656	462	0.570576	0.457086	1.10388	0.425646	1.23306	0.917834	1.14324	1.05596	0.198431	-0.251518	0.161528	0.863205	-0.63329	-0.286975	-0.26532
463	4.15585	1.88258	0.93784	3.90427	2.91573	1.47123	1.7514	2.25757	1.40351	2.24999	1.55275	1.4681	0.932669	1.19678	0.993491	2.28073	1.68985	1.24473	1.80135	2.26155	2.06909	5.51508	1.11877	4.66807	3.27996	4.60577	4.78755	2.92965	2.44458	2.49962	3.59985	3.0065	2.40363	463	0.518985	-0.0321223	1.40909	0.221102	0.981326	0.471141	1.04853	0.829276	0.529676	-0.117423	-0.18058	1.20928	-1.07193	-0.516905	-0.0869922
464	3.92357	2.33019	1.38865	4.03678	2.55958	1.15664	1.3831	1.77627	1.99871	2.12331	1.59418	1.6702	1.3406	1.28365	1.15872	2.25381	1.22499	1.13403	1.62825	2.85908	2.06479	5.58482	0.975136	4.04059	3.60785	4.12997	5.0896	2.70827	2.37861	2.41745	3.95444	3.15097	2.47977	464	0.570922	0.667565	1.67913	0.111989	0.624257	1.30658	0.686266	0.731404	0.478896	-0.495531	0.497041	0.786808	-0.339757	-0.255927	0.262136
465	3.67691	2.13321	1.3894	3.85899	2.91105	1.2406	1.67928	1.57936	1.78336	2.43029	1.90721	1.46203	1.77348	1.35478	0.850832	1.8344	1.5196	1.05767	1.88816	2.59517	1.6537	5.45591	0.869612	3.1195	3.36382	3.9419	4.99848	2.82777	2.82911	2.01863	3.94019	3.1909	2.56855	465	-0.0648097	0.477731	1.41779	0.148222	0.786273	1.21735	0.868101	1.14014	0.914397	0.0202323	-2.31826	1.06998	-0.297316	-0.407749	-0.251107
466	4.17354	2.33152	1.39564	3.80023	2.27244	1.40315	1.68312	1.75483	1.67421	2.30633	1.89131	1.48617	1.41171	0.987936	1.01691	1.91574	1.1905	0.588449	1.81136	2.5045	2.31793	5.68966	0.953323	4.39272	3.54521	3.63097	4.2601	2.62344	2.81209	2.26944	3.83517	3.0956	2.59685	466	0.333979	0.0691227	2.09793	0.263888	0.858303	0.631151	0.797827	1.17502	0.560837	0.1538	0.0303834	1.16034	-0.0274422	-0.248122	-0.302745
467	4.15785	2.44431	1.53438	3.92631	2.63331	1.36497	1.15221	1.822	1.41313	2.2752	2.09578	1.59226	1.49523	1.28054	1.16398	2.18412	1.75531	1.02035	0.958917	2.62887	2.12226	5.55164	0.916359	4.16883	3.43693	3.73414	4.50117	3.24518	2.40871	2.22679	4.00296	2.73234	2.21481	467	0.618259	-0.0398767	1.6788	0.206107	0.963069	1.14363	0.83985	1.03363	0.921648	-0.125128	0.292763	0.921255	-0.750996	0.217723	-0.0631464
468	4.21107	2.1232	1.4403	3.91121	2.77451	1.28278	1.3203	1.54799	0.878749	2.29157	1.69922	1.65791	1.7116	0.901699	1.07652	2.16344	1.32891	0.695419	1.5623	2.22427	1.87367	5.37388	1.76956	5.02331	3.28526	4.17788	4.95611	2.47705	2.35396	2.71508	3.50639	2.85122	2.5982	468	0.452073	0.112686	1.51206	0.266767	0.0205455	0.891385	0.270163	1.01992	0.871048	-0.29042	-0.135192	1.09743	-0.784381	-0.36053	0.0495942
469	4.22758	2.57271	1.3648	2.92064	2.8541	1.27296	1.3786	1.93981	1.34564	2.19004	1.72979	1.65205	1.0043	0.799934	0.558057	1.74647	1.35783	1.14478	1.3585	2.06874	2.10309	5.67887	1.60873	5.13651	3.14243	4.05884	6.53571	2.94854	2.91555	2.5253	3.98893	2.8713	2.28969	469	0.542573	0.153968	1.27808	-0.193555	0.483546	1.20645	0.849876	0.598045	0.661737	-0.031349	0.231571	1.00488	-0.599984	-0.238155	-0.199835
470	4.6699	2.14894	1.56954	3.21609	2.5572	1.43173	1.41823	1.67581	1.66341	2.2216	1.6916	1.72626	1.73129	1.17346	0.767933	2.02455	0.95886	0.611724	1.62044	2.27837	1.62437	5.73294	1.73879	5.21917	3.25287	3.82865	4.40539	2.50205	3.11053	2.36703	3.70886	2.76553	2.39877	470	0.497135	0.219732	1.41086	-0.767295	0.826835	1.00603	0.61076	0.10087	0.782393	-0.258729	0.202495	1.1451	-0.321175	-0.693671	-0.119469
471	4.22031	2.15685	1.25632	3.63486	2.61532	1.54022	1.64625	1.43912	1.24674	2.33063	1.81128	1.54173	1.25592	0.831203	0.810205	2.17189	1.05378	0.961162	1.70275	2.48528	2.275	5.11312	1.91627	5.22084	3.5846	3.69299	4.61567	2.73387	2.92861	2.39392	3.69026	3.06678	2.79144	471	0.221793	0.187661	1.47517	-0.786842	-0.289683	1.26395	0.663112	0.623726	0.702568	-0.221792	0.295992	0.648194	-0.387516	-0.625214	-0.151767
472	4.04473	2.33255	1.40156	3.54239	2.13507	1.32117	1.41975	1.03258	1.45621	2.19929	1.89291	1.37725	1.44636	0.963462	0.906059	2.12763	1.38498	1.07746	1.49541	2.42138	1.84308	5.7744	1.66014	4.88708	3.61258	3.42164	4.98776	3.16205	3.21761	2.64932	3.82958	2.68883	2.5084	472	0.384952	0.51462	1.27629	-0.51855	0.216861	1.25325	0.10633	0.793015	0.543112	-0.123227	0.495462	0.654156	0.0844871	-0.348184	-0.142405
473	4.68251	2.07168	1.31906	3.56957	2.47387	1.37575	1.6615	1.21949	1.53223	2.36155	1.65106	1.28735	1.78225	1.16853	1.02283	2.34255	1.3823	0.955636	1.67126	2.13068	0.564662	5.80207	1.1778	4.85143	3.0659	3.69572	4.84397	2.31052	2.83481	2.22839	4.02526	2.65009	2.29913	473	0.765797	0.856735	1.50457	-0.200186	0.00120727	1.36794	0.440435	0.0756975	0.383476	-0.308007	0.488021	0.919108	-0.14944	-0.879371	-0.144213
474	4.53874	2.3258	0.991304	4.24377	2.59418	1.16185	1.54841	1.59672	1.07978	2.21881	1.98207	1.39621	1.6932	1.39875	1.34095	2.22652	1.18559	1.00977	1.06095	1.96067	2.04358	5.77405	2.1879	5.43708	3.26862	3.86608	5.14408	2.07081	2.69263	2.90833	3.79672	2.99799	2.17856	474	0.311778	0.483533	1.52684	0.123864	0.75735	1.27879	0.441372	0.43881	0.554594	-0.712098	-1.12546	0.769684	-0.0494556	-0.593952	-0.0526408
475	4.34683	2.1174	1.33269	4.01717	2.54748	1.47732	1.42535	1.66999	1.40909	2.16326	1.84416	1.35784	1.46576	1.22504	1.27551	1.96009	1.34492	1.22056	1.75676	2.29184	1.81025	5.72455	1.92405	5.25021	3.54485	3.83008	5.20499	2.57632	3.04493	2.37448	3.69446	3.05341	2.57149	475	0.186267	0.514949	1.08726	0.126465	0.911345	1.02373	0.528393	0.285995	0.539335	-0.115068	-0.443362	0.450217	-0.0419709	-0.386577	-0.210248
476	4.38393	2.24946	1.08172	4.36553	2.58576	1.36592	1.24132	1.27417	1.54526	2.246	1.67045	1.96907	0.971705	1.06062	0.606328	2.16274	1.50859	0.432727	1.70721	1.93816	1.84314	5.74045	2.02866	4.77035	3.36201	3.82143	4.95151	3.21551	2.97973	2.54452	3.84301	3.03811	2.50615	476	0.614452	0.687924	1.18772	-0.0478099	0.605481	0.738069	0.548497	0.21032	0.333709	-0.42476	-0.393511	0.872322	-0.0153777	-0.291001	-0.177954
477	4.36178	2.00507	1.34173	3.17971	2.57508	1.64908	1.4977	2.01279	1.28594	2.3959	1.74447	1.74814	0.868223	0.978408	0.568305	1.96403	1.23939	0.574691	1.39545	2.2826	1.89686	5.08547	1.84825	5.50398	3.42749	3.98577	5.12543	2.38168	2.60912	2.46881	4.15147	2.9621	2.52765	477	0.397549	0.0347597	0.843304	0.026967	0.461816	1.03755	0.554814	0.76837	0.629336	-0.330443	0.29522	1.03886	0.161388	-0.319703	-0.723615
478	4.62784	2.28125	1.12459	3.55584	2.49381	0.934893	1.93214	0.763037	1.21966	2.41482	1.80072	1.88763	0.875985	1.11131	1.37346	1.9917	1.47546	0.980111	1.55359	2.11646	1.69487	4.83268	2.03478	5.07412	4.01952	4.17832	4.99884	2.7186	2.82515	1.98003	3.93798	3.14415	2.51447	478	0.168034	0.494265	1.02627	-0.347085	0.322892	0.918709	0.933878	0.808428	0.363813	-0.444387	0.304315	1.05651	0.216764	-0.311302	-0.918223
479	4.23719	2.56439	1.46231	3.42889	2.5793	0.193459	1.90309	1.76946	1.45455	2.14338	1.80906	1.35969	1.36077	0.811778	1.19283	2.03788	1.27535	0.9064	1.51321	2.50865	1.8878	5.46824	1.82264	4.92532	3.93934	3.78395	4.89647	2.44211	2.76493	2.31826	3.98133	2.96938	2.55472	479	0.638554	-0.00858743	0.788422	0.513989	0.269145	1.3091	0.724207	-0.186332	0.352981	-0.0521197	0.0932906	0.801887	0.367922	-0.205277	-0.20897
480	4.38641	2.39124	0.857424	3.72491	2.59481	0.124405	1.66602	0.936882	1.6984	1.97651	2.15686	1.31191	1.35186	1.15181	0.733967	2.02447	1.10735	0.946348	1.2124	2.00394	2.08529	5.20487	2.58411	4.58769	4.41864	3.63173	5.22755	2.69405	3.13456	2.33881	3.74574	3.06571	2.95157	480	0.979566	0.763388	1.15518	-0.212599	0.656786	1.63326	0.62783	0.890602	0.26211	-0.366405	-0.0590069	0.683334	0.340646	-0.119131	-0.130241
481	4.78445	2.34142	1.34925	3.63672	2.16773	0.39178	1.72647	1.03043	1.96252	2.41677	1.6172	1.85529	0.899929	0.823784	0.932634	1.91475	1.29758	0.778088	1.2248	2.10851	1.89598	5.55745	2.11947	5.01857	3.75256	3.95062	4.95287	2.17499	3.09861	2.34575	3.43925	2.98985	2.75759	481	0.713791	0.166457	1.07669	-0.164728	0.630675	1.35207	0.455257	0.547571	0.4345	-0.342126	-0.247913	1.42807	0.372217	-0.27456	-0.242981
482	4.28893	2.20819	1.50139	3.80501	2.33428	0.683545	1.5795	1.4002	1.75308	2.29071	1.82713	1.62825	1.07278	1.34833	1.27063	2.05358	1.27716	0.735296	1.37852	2.33928	2.1156	5.57568	2.09381	4.94587	3.91079	3.66962	4.69507	2.69765	2.3103	2.29315	3.85794	3.05809	2.43592	482	0.388337	0.294479	1.28852	0.0963955	-0.95826	1.0035	0.318046	0.0282242	0.257842	-0.0954658	0.199701	1.10987	0.510549	0.0719572	-0.385575
483	4.23631	2.6487	1.42763	3.53279	2.0159	0.843145	1.394	1.40317	1.44428	1.88807	1.59902	1.14065	1.40405	1.2142	1.31513	1.7848	0.993485	1.2347	1.77591	2.14076	1.94073	5.53406	2.09673	5.3087	3.8149	3.60068	5.4069	2.47034	2.33164	2.40709	3.98366	3.02276	2.3497	483	0.766972	-0.00832289	0.293856	-0.213314	-1.63006	0.691306	0.326079	0.520269	0.419654	-0.0360213	0.0533619	0.876912	0.113014	0.119448	-0.539497
484	4.27012	2.83364	1.1753	3.45223	2.04908	0.701887	1.13642	1.28055	2.0769	2.32116	1.97837	1.83929	1.64778	1.11406	1.19247	2.29374	1.39313	0.984587	1.48301	1.83595	2.11925	4.99138	2.23393	5.24699	3.23688	4.09935	4.86876	2.13937	3.55519	2.19364	3.56043	3.11	2.85117	484	0.792933	0.514802	0.570181	0.362908	0.345184	1.06251	1.3373	0.597214	0.160097	-0.426176	0.336951	0.70106	0.138151	-0.155213	-0.292101
485	4.39857	2.72108	1.45612	3.01732	2.47638	1.05215	1.23519	1.66569	1.34507	2.19109	1.73431	2.01838	1.56973	1.00875	0.910461	2.42845	1.41089	0.643231	1.45845	1.77989	1.95047	5.48696	1.54442	5.22815	3.53732	4.0311	4.53686	2.45187	3.55288	2.33607	3.75864	2.28277	2.65158	485	0.865673	0.292978	0.0380923	0.365222	0.450827	1.26083	1.22243	0.767336	0.379119	-0.0987716	0.0403238	0.713791	-0.549642	0.0692896	-0.250565
486	4.45307	2.53946	1.87831	3.85047	2.82168	1.2645	1.12087	1.27291	2.50206	1.82281	2.08778	1.76497	1.59711	1.16562	1.02346	2.30449	0.936483	1.03803	1.4669	2.33416	1.85828	6.20677	1.6899	5.36117	3.49509	3.69515	4.2664	2.87889	2.90545	2.6153	3.81798	3.01668	2.44019	486	0.821973	0.248279	0.359164	0.292196	0.194349	0.971699	1.03311	0.125778	0.223313	0.22534	-0.0537676	0.99476	-0.13516	-0.556121	0.190913
487	4.37027	2.27535	1.20085	3.708	2.73346	0.964341	1.09563	1.76079	2.3548	2.16782	2.06261	1.78491	1.56827	1.1144	1.04571	2.38669	1.33679	1.08547	0.510059	1.64691	1.74749	5.57318	1.53068	5.03509	3.65549	4.00247	4.06059	2.25856	3.51804	2.68844	3.80195	3.53449	2.50267	487	0.613734	0.153876	0.673033	0.314822	0.522022	0.695489	1.06472	0.797738	0.357721	0.317843	0.291334	1.54315	-0.569629	0.123786	0.214759
488	4.36424	1.88923	1.30233	3.88754	2.55489	1.35302	1.31799	1.29532	1.83621	2.17979	1.95574	1.31095	1.65906	0.632298	1.28037	1.4867	1.25418	1.14114	1.695	2.17681	1.95621	5.75672	2.23544	5.02293	3.78692	3.87025	4.45268	2.3947	3.04232	1.97104	3.89198	3.35655	2.59879	488	0.355459	0.197344	0.599481	0.0111527	0.452143	0.965135	0.772323	1.243	0.646313	-0.214893	0.316855	1.28467	-0.0351696	0.495864	0.295087
489	5.00725	2.53254	1.36822	3.39836	2.5042	1.05562	1.19748	1.60379	1.30393	1.89606	2.32498	1.88499	1.41468	0.868498	1.18307	2.009	1.23852	0.82912	1.15186	2.21242	1.75522	5.81169	2.13103	4.8257	3.77552	3.81309	4.17462	2.77832	3.36487	2.3126	3.72329	3.00188	2.5473	489	0.724477	0.449355	1.01937	0.437204	0.207124	0.425805	0.334508	0.0757385	0.544304	0.0821442	0.34875	1.31492	-0.492986	-0.0299021	-0.0589412
490	4.97066	1.81689	1.25417	3.3277	2.38345	1.22655	0.996756	1.72211	2.15566	2.18273	2.24146	1.9666	1.65762	1.15266	1.34423	1.90159	1.4538	0.811179	1.97756	1.99934	2.10845	5.75013	1.74553	5.00018	3.45445	4.24749	4.82111	2.38471	3.23062	2.30129	3.78628	3.33032	2.60733	490	0.572703	0.211945	0.73653	0.453214	0.166723	0.796579	0.793739	0.841286	-0.0910816	-0.102489	0.249529	0.928584	0.321276	-0.103508	0.194806
491	4.63172	2.33757	1.19706	3.09108	2.25247	1.25452	0.707185	1.61522	2.15931	2.18742	1.84233	2.1323	1.45025	1.16589	1.0506	1.92192	1.17816	0.978742	1.49129	2.7279	1.93529	5.03169	2.15068	5.03093	4.25082	4.05246	4.57913	2.50677	2.97072	2.61751	3.84503	3.19001	2.7862	491	0.497977	0.277842	0.924518	0.480708	0.579124	0.705287	0.610397	1.08653	0.509297	0.0661128	0.786573	0.967594	0.879713	0.13712	-0.000742708
492	4.28883	2.29614	1.05974	3.78497	2.01101	1.52009	0.873056	1.661	1.99362	2.40037	1.93652	1.6962	2.06906	1.06788	1.22558	1.89744	1.40135	1.09911	1.53921	2.59515	2.07085	5.30107	1.98734	4.60614	4.53138	4.18879	3.49016	2.26718	3.15821	2.17102	3.1823	2.8223	2.7192	492	0.873311	0.383494	1.08906	0.655804	0.238503	1.19199	0.571231	0.666788	0.380358	-0.121076	0.332804	1.1098	0.651352	-0.803722	0.118602
493	4.54624	1.67494	1.25421	3.35811	2.40843	1.52667	0.907372	1.38664	1.09114	2.37926	1.79758	1.47659	1.78203	1.17656	1.20372	2.23187	1.2174	1.05056	-0.794808	1.96651	1.54105	5.93981	2.09598	5.47437	4.03892	4.13102	4.23009	2.27842	2.56947	2.56504	3.3917	2.96309	2.51977	493	0.887808	0.406832	1.13078	0.616499	-0.227425	0.831303	0.478331	1.01528	0.569769	0.137938	0.445167	1.33431	0.319491	-1.13723	0.0196178
494	4.38324	2.10157	1.40795	3.90641	1.99727	1.13963	1.23421	1.77277	1.68758	2.1046	1.89033	1.74197	1.28758	0.801698	1.1084	2.20845	1.24846	0.980688	0.82662	2.33239	1.73968	5.15807	1.67438	5.05288	3.71244	4.04509	4.19274	3.19764	2.96363	2.36368	3.80934	2.62344	2.4921	494	0.479	0.286477	0.485845	0.565245	0.0640529	0.841866	0.713349	0.963088	0.515114	-0.20301	0.505558	1.11967	0.575952	-0.418225	-0.0503027
495	4.48467	2.3862	1.41811	3.71127	2.65328	0.768631	1.46569	1.84991	2.12238	2.08805	2.37304	1.55409	1.66306	0.989771	1.37403	2.38685	1.31119	0.959112	1.40612	2.36618	1.88337	5.14829	1.96352	5.12452	4.31241	3.80086	4.85906	3.55233	2.54168	2.36895	3.43251	2.83053	3.33446	495	0.729522	0.0266806	0.459528	0.085784	0.307471	1.20582	0.279037	0.774415	0.238396	-0.268703	-4.81665	1.07457	-0.0119071	-0.738265	0.332501
496	4.27195	1.97426	1.28457	3.80483	2.39721	1.45049	0.646315	1.69933	2.57469	2.21272	2.201	1.773	1.8023	1.33336	1.26452	2.20514	0.785602	0.946088	1.37075	1.60349	1.31398	5.34474	2.13336	4.92597	4.12808	4.11939	4.51514	3.219	2.51177	2.33159	3.56604	2.56915	2.8569	496	0.709665	0.147647	0.563698	0.418596	-0.0524512	1.31078	0.609232	0.65124	0.58605	-0.0984292	0.646344	0.743803	-0.493919	-0.796865	0.305708
497	4.65454	2.73636	1.14563	3.56531	2.38597	1.15399	0.744433	1.69024	2.19941	2.17014	2.03115	2.05074	1.79441	1.04875	0.784189	1.99475	1.11936	0.746778	1.37039	2.1477	1.69729	5.70533	1.86088	5.30487	3.83987	4.24752	4.93122	3.15846	2.93656	2.65315	3.87745	2.63948	2.88274	497	0.864873	0.210436	0.730469	0.675936	0.569646	0.0666738	0.537759	-0.0758712	0.881786	-0.0566898	-0.00678185	0.921404	-0.422935	-0.432009	0.0968485
498	4.26239	2.04905	1.21414	3.47047	2.1311	0.951569	1.24739	1.7264	2.1349	2.20389	1.91504	1.68051	1.65415	1.07651	1.23433	1.9196	1.06649	0.785677	1.5464	2.21024	1.24653	5.60404	1.81727	4.88409	3.56155	4.07537	5.10406	2.51548	2.69644	2.32243	3.89859	2.81654	2.5494	498	0.399647	0.404356	1.20888	0.166405	0.120346	1.37166	0.45252	0.715436	0.658793	-0.0525032	-0.545574	1.11892	-0.212843	-0.376035	0.190071
499	4.4707	1.81695	1.11913	3.56007	3.21971	1.40022	1.26206	1.90657	1.95547	1.96738	1.81851	1.66445	0.912521	0.712218	0.883541	1.93774	0.952019	0.653972	1.16877	1.88209	1.24658	4.60686	1.86214	4.77204	3.8352	4.23914	4.65181	2.52776	2.96536	2.22574	4.03619	2.73554	2.68742	499	0.95027	0.472073	0.914274	0.163896	0.566225	0.99939	0.102908	0.797056	0.982786	-0.26396	0.147346	1.40099	0.355355	-0.0168479	0.140613
500	4.75206	2.22938	1.03448	3.19064	2.45462	0.712531	1.38626	1.6517	1.73251	2.35324	1.96305	1.20007	1.52916	1.27303	1.13246	1.97665	1.32389	1.03429	1.73188	2.69548	1.71842	5.26039	1.81121	4.87061	3.70639	3.39284	5.36999	2.72015	2.74837	2.5343	3.75894	3.00028	2.69122	500	0.48184	0.0548437	1.05297	0.526622	0.218503	1.23525	0.463226	0.482641	0.876207	-0.348451	0.681589	1.20158	-0.123222	-0.108102	0.269827
501	4.1739	1.72177	1.40658	3.52986	2.47642	0.389329	1.69649	1.66672	1.42071	2.23413	1.99685	2.09599	1.01705	1.15855	1.28549	1.95592	0.996774	0.70768	0.344857	2.06338	1.78956	4.7982	2.35875	4.47563	3.50173	4.0086	4.78476	2.2588	2.6727	2.45205	3.9204	2.93778	2.50689	501	0.857077	0.479857	0.842475	0.854013	0.110226	1.35215	0.164595	0.377678	1.07836	0.159553	0.702469	2.07356	-0.0934113	-0.282203	0.497162
502	4.15659	2.03296	0.997973	4.03236	2.5653	0.910248	1.59696	1.89809	1.78006	2.58288	1.98273	1.81274	1.78373	0.747378	1.17692	2.12051	0.948841	0.658271	0.769267	2.56847	2.07678	5.10337	1.629	4.61707	3.73212	4.24449	5.301	2.62102	3.11358	2.5954	3.94335	2.72878	2.22759	502	1.03726	0.41853	0.74262	0.308882	0.456413	1.13694	0.795269	0.993816	0.746323	-0.292528	0.634026	1.65896	0.121855	-0.287565	-0.0617581
503	4.40685	1.66172	1.45537	3.23901	2.76883	1.03438	1.05246	1.52029	1.62975	2.47755	1.8681	1.32594	1.84172	0.572618	1.50122	1.95669	1.1072	0.90299	1.8006	2.39672	1.26946	5.05892	1.98509	4.94639	3.94695	3.8178	5.20517	2.59987	2.89385	2.59275	3.89474	3.0836	2.57041	503	0.849805	-0.0882866	0.777115	0.62459	0.542801	0.541271	0.617872	0.973436	0.480435	0.0584238	0.398693	1.22981	0.195034	-0.259807	0.234569
504	4.19059	2.15951	1.42415	3.51512	2.76118	1.14939	1.42392	1.57467	1.86302	2.28069	1.89771	1.73695	1.72969	0.816991	1.08954	1.54968	1.18478	0.418326	1.90905	1.90331	1.3511	5.17739	1.99943	4.10921	4.08901	3.41923	6.02209	2.88142	3.1679	3.08565	4.22829	2.8493	2.42798	504	0.997251	0.168311	0.945	0.30072	0.160298	1.07365	0.747624	0.721876	0.732594	-0.277988	0.0452994	1.32386	0.149411	-0.276593	0.314701
505	4.29703	1.8998	1.49732	3.25694	2.0899	1.07997	1.50275	1.4417	1.69064	2.18102	1.96357	1.69067	2.16799	1.21487	1.16724	2.09359	0.658432	0.450353	1.22869	1.63136	1.55555	5.33179	2.03295	4.1432	3.85904	3.35827	6.05338	2.62441	3.16045	3.01378	3.66241	3.23624	2.69881	505	0.76827	0.240147	0.403831	0.23504	0.0465607	1.63962	0.729918	1.19376	0.391635	-0.353459	0.224655	1.15413	0.169939	-0.263722	0.264485
506	4.68696	2.16598	1.433	3.53625	2.36352	1.5017	1.64492	1.34399	1.42335	2.33697	1.8914	1.6877	2.25285	0.982249	1.49904	1.73174	1.22488	0.529955	0.820617	1.13847	1.96341	5.33843	1.60479	4.88986	3.91382	3.52453	6.69062	1.94155	2.87298	2.73547	3.84235	3.18485	2.51598	506	0.537561	0.662568	-0.06022	0.105792	-0.110226	1.14609	0.144469	0.91723	0.58678	-0.341852	0.322495	1.15783	0.317053	-0.0816558	0.206651
507	4.13643	2.04269	1.33348	3.62338	2.23758	1.83566	0.875886	1.71866	1.86655	2.32392	1.70568	1.28959	1.88228	1.12999	1.34904	1.93365	0.972079	0.991605	1.1209	2.08908	1.41866	5.30441	1.1936	4.68215	4.26758	3.84691	6.80064	2.21169	3.25456	2.74817	4.13327	2.58013	2.03074	507	0.55457	0.499245	0.274473	0.17017	-0.164018	1.17455	0.312019	1.02774	0.542491	-0.22115	0.163117	1.2528	0.435341	-0.050785	0.179793
508	4.37367	1.82924	1.17923	3.64481	2.51765	1.89464	0.61946	1.7354	0.847914	2.42893	1.75567	1.95174	1.62929	1.49975	1.0041	1.78391	0.587269	0.963359	1.1479	1.02131	1.5838	5.60272	1.5818	4.76111	4.12278	4.23965	5.94754	2.54918	2.90495	2.47023	3.70725	2.76145	2.40937	508	0.705102	0.57637	0.348258	0.124116	0.601135	0.646688	0.429605	0.887962	0.339511	-0.828845	-0.245437	1.73772	0.132567	0.0287016	0.526582
509	4.21186	1.97942	1.27881	3.73695	2.51261	1.84812	1.57171	1.67754	1.77867	2.41405	1.65785	1.92233	1.62697	1.0928	1.3933	2.07906	1.0284	1.05789	1.56098	1.59138	1.18813	5.14364	1.62919	4.61538	3.84655	4.11052	5.15372	2.01337	2.72449	2.48853	3.82426	3.04096	2.57752	509	0.175158	0.511637	0.575274	0.581299	0.281723	0.864176	0.165345	0.656646	0.380551	-0.506677	0.241816	1.23456	0.177312	-0.131317	0.420255
510	4.16918	1.86081	1.0057	4.05429	2.785	1.58845	1.48808	1.46984	1.42448	2.22081	1.93007	1.09679	1.60634	1.25173	1.27813	1.43768	1.05828	0.538338	1.67456	1.9206	2.0205	5.59189	2.27531	4.93021	4.11241	3.72158	4.86208	2.50925	3.06253	2.29331	3.99058	3.07319	2.30244	510	0.564856	0.51476	1.03301	0.336021	0.720053	0.867344	0.527541	0.601644	0.325787	-0.734387	0.451725	1.02637	0.209775	-0.151411	-0.0564086
511	4.24768	1.98726	1.21612	3.91972	3.44649	1.41567	1.28024	1.72974	0.994514	2.26745	1.48515	1.44712	1.44176	1.43722	1.20802	1.715	0.87104	0.446654	1.26321	2.39445	1.65249	5.82003	1.963	5.15134	4.04724	3.60567	5.18265	2.49253	2.90507	2.136	3.57152	2.93565	2.27774	511	0.611882	0.342896	1.01014	0.11798	-0.311152	1.05364	0.825694	0.534213	0.0249654	-0.369691	0.444459	1.05486	-0.582561	-0.425683	-0.26626
512	4.4467	1.91964	1.4837	3.40079	2.98646	1.58862	1.62164	1.83061	1.50471	2.23253	1.63017	1.7823	1.6937	1.12999	0.64074	1.75648	1.04839	0.866402	1.44349	1.95111	1.20285	4.9228	1.80658	4.92616	3.62474	3.48566	5.12295	2.77505	3.05157	2.12031	3.46136	3.15978	2.55981	512	0.65456	0.350239	0.767533	0.0405734	-0.00302605	0.583351	0.667237	0.538009	0.258596	-0.271753	-0.682884	0.990312	-0.0896228	-0.299002	0.362959
513	4.52433	2.36754	0.718521	3.40772	2.73605	1.5306	1.7008	1.77139	1.29675	2.2069	1.90167	1.70708	1.58956	0.951185	1.3176	1.73849	1.15694	0.838993	0.944827	2.13118	0.738266	5.06901	1.99952	4.92884	3.34104	3.96783	4.98988	2.49184	3.7811	2.68705	3.81222	3.04875	2.49008	513	1.06208	0.568445	0.85758	0.468572	-0.214972	0.516251	0.542705	0.858902	0.465682	0.0141629	0.160446	0.905367	-0.00161697	-0.279558	0.293174
514	4.64568	1.50805	1.18409	2.8899	3.00675	1.70235	1.3176	1.61514	1.65521	2.18326	2.07879	2.02474	1.77604	1.0556	1.2503	1.26991	1.13749	0.361538	1.49825	2.06234	1.29498	5.25565	2.18758	3.98622	3.41731	3.75404	4.97047	2.33107	3.54839	2.60505	3.83953	3.19221	2.39878	514	0.875254	0.521378	0.571207	0.508168	0.266969	0.892026	0.801151	0.343365	0.123492	-0.163823	-4.89011	0.987189	0.00567205	-0.0383908	0.366369
515	4.56812	1.86066	1.47517	2.89943	2.81623	1.42702	1.34346	2.0545	1.60677	2.0535	1.644	1.82614	1.38963	1.02148	0.974048	2.10412	1.35069	0.6388	1.51389	1.43502	1.46656	4.52936	1.82152	4.16797	3.61824	4.0723	5.46892	2.31417	3.49132	2.28832	3.91294	2.99998	2.21289	515	0.493874	0.567582	0.367015	0.114026	0.257731	0.954318	0.570318	-0.706254	0.479614	-0.27265	0.762129	0.955555	0.0774824	0.372183	0.340283
516	4.16379	2.16242	0.914587	3.74869	2.63676	1.52758	1.75222	2.13477	1.78474	2.29804	1.80513	1.91651	1.80157	1.33941	1.51169	2.11562	1.3676	1.25821	1.38142	1.583	1.46397	5.23162	2.2551	4.46709	4.15377	4.01183	5.39919	2.10894	3.66211	2.46401	3.99155	3.0289	2.17831	516	0.758775	0.0715994	1.00009	0.0513329	0.0933727	0.727232	0.70518	0.535991	-0.0151621	-0.575967	0.513172	1.01509	-0.353573	-0.156847	0.179761
517	4.52134	1.92324	0.966495	4.4438	2.41028	1.01015	1.48034	1.90841	1.31782	2.37241	1.72887	1.91007	1.63554	0.884322	1.27492	2.11289	0.959858	0.662896	0.350074	2.36773	1.86363	4.97033	1.7863	4.55358	4.84105	3.72958	5.30524	2.53698	3.57267	2.61327	3.81273	3.59941	2.174	517	0.33102	-1.15565	0.225389	0.102811	-0.398528	0.36114	0.572709	0.572637	0.202265	-0.0480477	0.0475659	0.8861	-0.0951774	-0.318629	0.0971754
518	4.68641	1.95039	0.893604	3.82168	2.1264	1.71482	0.983235	1.75634	0.854292	2.00532	1.91659	2.00393	1.98914	1.08298	0.825362	1.41629	0.605352	0.393825	1.07348	2.45025	1.12585	3.69474	1.82169	4.48333	4.74907	3.81586	4.87199	2.26464	3.2969	2.42445	4.03513	3.91496	2.41441	518	0.540195	0.152119	0.294198	0.294989	0.444275	-0.256461	0.777577	0.10781	0.788705	-0.0745628	0.385614	0.766684	-1.01149	-0.162901	-0.36576
519	4.21834	1.40939	1.14548	4.18673	1.44791	1.39412	1.39705	1.82589	1.55489	2.12816	1.68469	1.27867	1.77061	0.789836	1.39012	1.85812	0.705587	0.823056	1.84474	2.28808	1.71759	4.76567	1.98028	4.42005	4.00255	4.09596	4.67111	2.54851	3.42161	2.41634	3.83165	3.39201	2.20481	519	0.37704	0.313771	0.354057	-0.77035	0.463618	0.771309	0.774402	0.484897	0.825653	-0.129188	0.569413	0.846459	-1.02966	-0.386925	0.246807
520	4.24511	2.26502	0.97233	3.85002	2.42227	1.45988	1.37861	1.57992	1.43922	2.16612	1.61378	1.75585	1.55827	0.780101	1.42133	2.34483	1.53634	1.08163	1.16514	2.01948	1.36282	4.4684	1.5686	3.66295	4.09029	3.8922	4.30792	3.02659	3.28821	2.00342	3.76718	3.21941	2.19517	520	0.698642	0.479168	0.694577	0.228901	0.2066	0.310644	0.146545	0.548793	1.29836	-0.172739	0.215887	0.673818	-0.89374	-0.148481	0.225436
521	4.08137	2.07391	0.950631	3.56359	2.32805	1.47576	1.62642	1.83976	1.03422	2.48382	1.54987	1.97592	1.40257	1.15465	1.24439	2.19612	1.31451	0.577703	0.479639	2.03206	1.53312	4.92481	1.9432	4.76447	4.15033	3.87075	5.04656	2.4289	3.49924	1.94907	3.52862	3.04776	2.27938	521	0.631051	0.43331	0.720909	0.256527	-0.07675	1.00519	0.260187	1.09594	0.670383	-0.562444	-0.136751	0.713496	-0.667191	0.0111875	0.698465
522	4.34176	1.97303	1.37028	3.63869	1.95629	1.60224	1.08045	1.74064	1.47917	2.28962	1.70907	1.45972	1.49012	0.870024	1.3523	1.77138	1.32917	0.299201	1.12255	2.20643	1.28641	4.80216	1.6153	4.52481	4.00776	5.42652	4.58108	2.17292	3.19813	2.28019	3.14548	3.35327	2.25722	522	0.558929	-0.268166	0.734013	0.211204	0.335696	0.758459	0.68096	0.631273	0.488136	-0.505874	0.188826	-0.00523496	0.868	-0.260899	-0.0832127
523	4.42826	2.31302	0.759703	3.34559	2.39577	1.29772	0.800967	1.8151	0.970778	2.15345	1.91473	1.51772	1.4511	0.595471	0.851908	2.14479	0.773037	0.677703	1.20676	2.6965	1.63005	4.19252	1.62315	4.17292	4.14869	4.83359	4.67995	2.86986	3.41593	2.51904	3.50518	3.17735	2.32749	523	0.756616	0.274658	0.669213	0.0858052	0.396313	0.478544	0.796907	0.527104	0.650802	-0.876661	0.116003	0.379295	0.546987	-0.549441	0.0564448
524	4.16124	2.39142	1.35184	3.41944	2.04295	0.550712	1.45163	1.51965	1.41088	2.5074	1.62589	1.34585	1.52353	0.851268	1.37621	1.82404	0.956184	0.960482	1.01439	2.26337	0.921329	4.82577	1.79587	3.99151	4.28605	4.29559	4.77905	2.45778	2.77668	2.7084	3.73757	2.81323	2.28847	524	0.722179	0.27006	0.96455	0.208994	0.459063	0.762719	0.779531	0.974969	0.275852	-0.119344	0.700717	0.392565	0.287365	-0.51037	0.0282164
525	4.77203	2.30663	0.741206	3.8792	3.3774	1.09176	1.3799	1.53056	1.67286	2.32201	1.8536	1.82998	1.68127	1.06038	0.82085	1.82859	0.862942	1.03478	1.05994	2.28714	1.55371	4.8169	1.81974	4.99906	4.17154	4.45088	4.92414	2.30762	2.86918	2.79175	3.70784	3.02047	2.37645	525	0.683252	0.771688	0.891718	0.662261	0.614675	0.685111	0.751859	0.20065	0.11235	-0.423507	0.2692	0.448928	0.165807	-0.35413	0.0105068
526	4.5537	1.9136	1.30942	3.71167	3.29975	1.27585	1.08824	1.59823	1.33094	2.59033	1.26735	1.83136	1.48661	0.844042	0.94794	2.10194	1.10455	1.20755	1.56743	1.96802	1.30919	4.27431	1.91002	4.7927	4.09438	4.32685	4.74271	2.05279	3.25452	2.44959	3.65041	3.06629	2.26716	526	0.802671	0.446925	0.844447	0.18873	0.235431	1.02722	0.358627	0.721774	0.367603	-0.468621	-0.188363	0.772883	0.336813	-0.538113	0.442841
527	4.30697	2.01253	0.931732	3.4214	2.98036	1.37872	1.03504	1.4244	1.17771	2.33259	1.72659	1.94109	1.32253	0.706318	1.30409	2.21669	0.84189	1.00264	0.740776	1.9176	1.62548	4.57945	2.03321	4.0544	3.93373	3.20402	3.98768	2.82612	3.43344	2.59183	3.62068	2.8669	2.35684	527	0.779441	0.390573	0.65202	0.0638401	0.362261	1.17893	0.778183	1.04738	0.341566	-0.618116	-0.502548	0.928237	0.0918424	-0.629956	0.327693
528	4.30684	1.70387	0.952482	2.79801	2.19114	1.15881	1.65678	1.46008	1.2499	2.45042	2.18452	1.87524	1.32355	0.791803	1.5432	2.56556	1.3392	0.953121	0.93244	1.90167	1.73705	4.81494	2.56991	3.76967	4.16036	3.62151	4.66661	2.53846	3.17178	2.95573	3.77084	2.96583	2.25986	528	0.426339	0.368804	0.791158	-0.563003	-0.0849727	0.680894	0.493707	0.100916	0.70949	-0.501067	0.246462	0.752018	0.274587	-0.168413	0.0789371
529	4.10399	2.17957	0.932174	3.23471	1.86255	1.52086	1.73726	1.50334	1.18037	1.95444	1.79495	1.56982	1.54452	0.741674	1.37248	2.00851	0.967503	1.45718	0.99125	2.30561	1.6433	5.16825	1.90162	4.25019	4.25341	3.88876	5.10729	2.56292	3.29722	2.34332	3.84	2.90031	2.25163	529	0.565162	0.690028	0.507971	-0.416117	0.085693	1.05818	0.566735	0.289603	0.458976	-0.181564	-0.202214	0.802862	0.303876	-0.23269	-0.103281
530	4.74193	2.14071	1.16051	3.74188	1.46165	1.39725	0.970279	1.75259	1.1765	2.38498	1.58236	1.42379	1.49211	0.410669	0.62204	2.15151	1.041	0.780932	0.515684	2.25029	1.51958	4.66252	1.70581	4.37652	4.25077	3.82696	5.12636	2.42183	3.48669	2.21144	3.91918	3.13968	2.41059	530	0.615387	0.894621	1.03436	-0.304257	0.0645697	1.00806	0.812592	0.58042	0.0184606	-0.80188	-0.121347	0.699464	0.00473196	-0.451988	0.201778
531	4.77436	1.98008	1.51342	3.93085	0.593187	1.43138	1.69785	1.75814	1.21254	2.16115	1.64752	2.04131	1.03572	0.889143	1.08169	1.58174	1.01784	1.26402	1.33317	1.83655	1.4729	4.91608	1.99469	3.86586	4.20203	4.21574	4.82952	2.29558	3.01258	2.57841	3.78399	3.22438	1.99381	531	0.823531	0.43949	0.612978	-0.595026	0.289092	0.98749	0.60127	0.707997	0.473633	0.0639571	-0.509935	0.580738	0.0509555	-0.0936	0.595339
532	4.25023	2.40932	1.11019	3.42776	1.39859	1.22476	1.72393	2.04151	0.977135	2.19426	1.87387	1.70417	1.36096	1.01683	1.19283	1.38007	0.595324	0.740928	1.66597	1.79228	1.58384	5.34157	1.49837	3.44439	3.9907	3.94304	4.74227	2.68933	3.46459	2.37669	4.06948	3.08142	2.15368	532	0.684348	0.239093	0.884741	-0.0544718	0.43484	0.804581	0.875788	0.645664	1.04786	0.0315576	0.322063	0.914975	0.26646	-0.177211	0.114981
533	4.22253	1.98223	1.26041	3.9186	1.43127	1.38145	0.988882	1.48764	0.422348	1.97175	1.74938	2.08319	1.51062	0.864841	1.08874	1.9601	0.902717	1.06706	1.43125	0.74181	1.5288	5.43664	2.05424	3.21456	4.13678	3.35683	4.75623	2.06982	3.10927	1.47356	4.38823	2.76195	2.04848	533	0.5865	0.594442	0.678694	-0.214852	-0.0527239	0.858269	0.861941	0.101184	1.19764	0.0937405	0.559188	0.631487	0.359358	-0.0557642	0.631864
534	4.30606	1.72298	1.32692	2.98615	1.92945	1.32481	1.56792	1.53207	0.886666	2.18333	1.71033	1.84605	1.60474	1.15901	1.40418	2.1808	0.873035	0.990006	1.18613	1.84819	1.92854	5.33114	2.1666	3.62678	4.31843	3.68465	5.20192	2.38346	2.97985	2.11524	4.28829	2.82888	2.22361	534	0.594559	0.448125	1.0575	0.511629	0.523022	1.09258	0.495401	0.633136	1.19222	-0.061701	0.0783903	1.1783	0.361451	-0.367554	0.275885
535	4.22386	2.38028	1.38803	3.67541	1.69832	1.29842	1.31511	1.41179	0.494472	2.1586	1.46656	1.36001	1.37814	0.998729	1.53849	1.73998	0.337928	1.04339	1.15409	2.09328	1.66808	5.1448	2.09597	3.90159	3.9512	4.08814	4.54556	2.55943	3.01977	2.30775	4.03029	2.92728	2.09591	535	0.928757	0.799216	1.61647	0.20577	0.670994	0.579225	1.00106	0.555384	1.47715	0.258643	-2.51253	1.0655	0.142372	-0.264513	0.0933387
536	4.03613	2.21031	1.36006	4.14429	1.30667	1.45014	1.58774	1.10136	0.544781	2.17327	1.49524	1.53846	1.54464	0.470341	1.44566	2.25753	0.859346	1.09417	1.1424	1.96862	1.107	4.58157	2.57732	4.21332	4.25484	4.76484	4.74202	2.77372	2.73142	2.11124	3.78221	2.91322	2.22985	536	0.932688	0.629821	0.810097	-0.0191744	0.235399	0.268017	0.424613	0.767114	1.00959	0.172318	-0.0204474	1.01731	0.304421	-0.559966	0.311876
537	4.62248	1.80298	1.18996	4.01558	1.54858	1.56614	1.42879	1.34916	0.986505	2.18336	1.90763	1.91416	1.31945	0.867753	0.938424	1.64904	1.04585	0.926027	1.3371	1.81344	1.69176	4.50314	2.58944	3.84993	4.32037	4.29698	4.19025	1.935	3.34027	2.12043	3.85319	2.99207	2.16555	537	0.592992	0.424843	1.00614	0.140501	0.169048	0.399598	0.854128	0.481324	0.958391	0.301716	0.154794	0.780561	0.0610377	-0.633577	0.122707
538	4.61261	1.82641	0.922859	4.02772	1.58701	1.45121	1.37382	1.96218	1.00241	2.21606	1.95057	1.47812	1.581	0.742152	0.460203	2.26038	0.644877	0.746004	1.05614	1.80724	1.39157	4.83341	2.26562	4.34269	4.18039	4.37963	4.49343	2.24592	3.19954	2.22232	4.20348	3.21351	2.3159	538	-0.149819	0.466742	1.12762	0.0804406	0.133994	1.06288	1.37085	-0.756551	1.11386	-0.014671	-1.15934	0.632992	0.767692	-0.0452604	0.599035
539	4.69943	1.79552	1.01039	3.85076	1.55365	1.22317	1.17123	1.54023	0.889924	2.25264	1.81218	1.87499	1.32104	0.745573	1.40574	2.0286	0.795939	0.410258	1.29698	1.91394	1.55833	4.92125	1.92758	4.36054	4.05738	4.19025	4.67602	2.28613	3.5544	2.3812	3.96348	3.12521	1.49632	539	1.08658	0.653904	0.44721	-0.140543	0.0806963	0.926613	0.756952	1.00557	0.735	-0.0136617	0.500401	0.940153	0.410831	-0.231163	0.356046
540	4.45692	1.70784	0.742233	3.75855	1.59567	1.13036	1.32778	1.36087	1.00761	2.18356	1.71466	1.68511	1.46369	1.00849	1.52647	1.66492	0.742791	1.18764	1.53889	1.94248	1.86235	4.9801	2.54927	3.44622	3.85726	4.10884	4.51549	2.38562	3.32556	2.52139	4.11783	2.97039	1.81196	540	0.452259	0.731842	0.73159	-0.665053	-0.569942	1.03068	0.92717	0.509154	0.255866	-0.360233	0.225918	0.95213	0.213404	-0.227823	0.684945
541	4.94378	1.35853	0.829091	3.5157	1.88467	1.17089	1.35305	1.69497	1.06188	2.14543	1.93102	1.83644	1.56974	0.908492	0.929221	1.8518	0.850475	0.629688	1.78988	2.55317	1.73992	4.29696	2.65701	4.2843	4.18586	4.46073	4.894	2.82135	2.52676	2.42355	3.96026	2.53685	2.082	541	0.893301	0.540162	0.769053	-0.104164	-0.0332689	0.781934	0.573543	0.936944	0.375188	-0.594051	0.632283	1.14325	-0.0194794	-0.0239355	0.0336985
542	4.7403	2.00971	0.823023	3.64653	1.71525	1.37521	1.97902	1.77742	1.25878	2.29804	1.89438	2.14414	1.37317	0.756473	1.4541	1.86177	1.22476	1.062	0.960709	2.25803	1.80981	5.03088	2.51586	4.32019	4.03754	4.09511	4.58307	2.69579	2.88977	2.20162	4.0371	2.03626	1.82686	542	-0.251089	0.160608	0.544802	0.0577675	0.445639	0.100795	1.03872	0.72595	0.542724	-0.286866	0.526689	0.940362	0.243177	0.147599	0.311477
543	4.63831	2.19566	1.23022	3.82126	1.75782	1.45916	1.89755	1.60894	0.945484	1.90173	2.08945	1.53069	1.49585	0.774447	1.15793	1.69252	0.398464	0.54197	1.57348	1.66599	2.12399	4.6669	2.5391	4.19174	4.06347	4.4079	4.30325	2.69999	2.58755	2.15008	4.08979	2.55149	2.02192	543	0.743002	0.681891	0.490786	-0.33965	-0.0328482	0.82291	0.289032	0.127921	0.337279	-0.48217	-1.52809	0.929143	-0.0250317	-1.30013	0.754096
544	4.17857	2.02272	0.904825	3.54648	1.43798	1.20825	2.18214	1.54886	1.08597	2.40345	1.76688	1.89298	1.34483	0.786071	1.24994	1.6263	0.729988	0.751162	1.2881	2.16613	1.66435	4.89615	2.4739	3.88701	3.57744	4.08364	4.69138	2.51005	3.04662	2.5065	4.16559	2.61696	1.60134	544	1.14232	0.598343	0.87136	-0.341983	0.302622	0.440926	0.949351	0.476533	0.621011	-0.400646	0.0925727	0.971451	-0.139459	0.108155	0.584379
545	4.42867	1.53896	1.27157	3.76393	1.71252	1.7739	1.46623	1.35798	1.07935	2.24134	1.84603	1.68688	1.75811	0.756921	1.29735	2.18552	0.794526	0.971362	1.29513	1.94271	1.20326	5.52135	2.63028	4.00593	3.6435	4.20133	4.53457	1.84429	2.71555	2.40283	3.74372	3.21839	1.67101	545	1.20968	0.729095	0.88119	-0.135865	0.126288	0.768519	0.747101	0.632076	0.435129	-0.267936	-0.402211	0.994378	0.274088	0.337713	0.453637
546	4.15739	2.19597	1.14153	3.46177	1.79182	1.78558	1.63855	1.74909	1.27685	2.33638	1.33702	1.68957	1.61573	0.783129	1.35228	1.7791	1.31025	0.656449	0.611636	2.65777	1.76012	5.00994	2.9647	4.21878	4.1082	4.15336	4.0309	2.33242	3.40943	1.86313	3.76212	3.49291	1.94681	546	0.599577	0.560716	1.00828	-0.118572	-0.104711	0.585942	0.652142	0.554832	0.549336	0.184052	0.241677	0.77692	0.146834	-0.0255171	-0.0925095
547	4.21831	1.91221	1.15055	3.467	1.97951	1.51563	1.48236	1.56974	0.861308	2.20654	1.83505	1.36959	1.73017	1.07858	1.07814	1.79638	0.919479	0.977904	1.04442	1.6777	1.86577	5.08432	2.53343	3.81544	4.20775	4.05438	4.75264	2.20524	3.34135	1.87292	3.99716	3.17901	1.76253	547	0.0345357	0.569544	1.0087	0.378306	0.251138	0.489453	0.602298	0.368164	0.343926	0.688371	0.185603	0.956936	0.240014	-0.0383165	-0.31324
548	4.29955	1.93605	1.26867	3.71946	1.99674	1.8243	1.69315	1.75499	1.115	1.94014	1.52618	1.69609	1.54811	1.00809	1.44575	1.60989	0.861319	0.766407	1.50706	1.78205	1.59346	4.48783	1.78439	3.80717	3.96942	4.26787	4.04969	2.64636	3.04446	1.84824	4.25441	3.44562	1.47117	548	0.146828	0.695602	1.09966	-0.103412	0.653968	0.551475	0.613977	0.778895	0.101375	1.03639	0.303138	1.033	-0.0245428	-0.451895	-0.201692
549	4.20855	1.67442	0.995452	3.71514	2.1308	1.55107	1.14956	1.90834	0.545009	1.66088	1.92717	1.32734	1.79944	1.02243	1.32317	1.86856	1.18824	0.719211	1.34381	2.17892	1.76833	4.81052	2.30907	4.20757	3.8345	4.08281	4.44639	2.33987	3.46591	1.96817	3.87963	3.31415	2.05036	549	0.67612	0.728066	0.902894	-0.0960759	0.302854	1.03377	0.559762	0.186146	1.04494	0.976927	0.0507522	0.81729	0.141636	0.250671	-0.116925
550	4.45831	1.85647	1.22133	3.81101	2.21351	1.67556	1.91222	2.6629	0.978162	2.01137	1.77338	2.19557	1.43506	0.956869	1.48234	1.35672	0.974825	0.556064	0.838303	2.43797	1.93774	5.08033	2.28784	4.16134	3.98831	4.05391	3.8934	1.54872	3.41232	1.79661	4.41319	3.08378	1.99461	550	0.773171	0.500963	0.912877	-0.490418	0.304356	1.3047	-1.17278	1.04634	0.511255	0.319932	0.753367	1.23489	-0.00770393	-0.249028	-0.117984
551	4.09628	2.36889	1.12634	3.38364	2.1262	1.06165	1.7398	2.22897	0.758435	2.19431	1.87947	2.00424	1.46548	0.876007	0.834706	1.4734	1.62393	1.0684	1.25197	2.16726	1.5072	5.18781	2.49455	4.42464	4.13138	3.16502	4.49292	1.94565	3.73077	1.889	4.287	3.03609	1.77114	551	0.694814	0.626314	0.766987	0.298879	-0.0494323	1.21435	0.127281	0.569086	0.0226349	0.377976	0.157332	1.26217	-0.323717	-0.0230033	0.238286
552	3.92608	1.93678	1.04363	3.22151	1.65212	1.50349	0.884403	1.96668	1.31013	2.28694	1.56073	2.03618	1.66128	0.759445	0.809678	1.31297	1.12503	1.16187	1.45669	2.55512	1.74173	4.64082	2.48492	4.26752	4.31556	2.72991	4.63827	2.87151	3.41147	2.57838	3.90458	3.00115	1.76184	552	0.574871	0.782368	1.04178	-0.344559	0.118582	1.18185	0.285616	0.814311	0.593608	0.130189	0.0874371	1.69697	-0.234429	0.0168493	0.418639
553	4.21844	1.7047	0.881648	3.31196	1.78114	1.24607	0.937673	1.81726	1.32218	2.29045	1.9625	1.80198	1.19118	0.78304	1.20074	1.35832	0.853619	0.921	1.59644	1.81775	1.86887	4.11997	2.45302	4.37307	3.78435	3.44345	4.714	2.69885	2.95726	2.62634	4.17504	3.00731	2.11055	553	0.480771	0.597504	1.01924	-0.0567294	0.0449056	0.00904721	0.652027	0.982226	0.22331	0.144665	0.50497	1.29688	-0.364269	0.173287	0.257103
554	3.96014	2.12516	1.1141	2.98902	2.08979	0.834941	1.13955	1.73278	0.984596	2.38903	1.70652	2.06345	1.53601	0.668043	1.55237	1.59583	1.00746	0.828602	1.70912	2.1341	1.98207	5.09452	2.84252	4.12181	4.35956	3.27473	5.07621	2.333	3.19555	2.55641	4.01748	3.16741	1.84506	554	1.33708	0.529393	0.765175	-0.0341481	0.30704	0.241396	0.335848	0.949962	0.107785	0.166065	0.357462	1.32007	0.267994	-0.656196	0.161842
555	3.7324	2.00317	0.833342	3.46391	1.99941	1.27792	0.92821	1.67871	1.25537	2.24372	1.81625	1.86147	1.16095	1.35663	1.24089	1.08949	0.977301	0.793732	1.55514	1.94359	1.65244	4.7581	2.34608	3.44697	4.40968	3.42976	4.75631	2.3777	3.22244	2.37515	4.0787	3.18282	1.91492	555	0.304927	0.446174	0.317975	-0.187226	-0.0667678	1.122	0.675457	0.111351	0.147265	-0.0152388	0.127731	0.958973	-0.209953	-0.764197	0.303033
556	3.98695	1.75021	1.18334	3.66697	2.05211	1.3036	0.971413	2.26269	1.17101	2.18258	1.88524	1.84998	1.27974	1.12048	1.48621	1.40523	0.136454	0.650197	1.8078	2.04366	1.7701	5.36825	2.59278	3.82654	3.93054	3.5262	4.76591	2.11414	3.15625	2.33333	3.95892	3.21172	1.97761	556	1.05843	0.755814	0.50485	-0.106365	-1.03475	0.459338	0.122023	0.757571	0.00904082	0.0177682	0.430111	1.32287	-0.593422	-0.602037	0.460941
557	4.00638	2.11223	1.22061	3.50152	2.05636	1.32123	1.28095	2.18397	0.985745	2.31104	1.77247	1.868	1.5063	1.17434	1.0063	1.3864	0.690027	0.947858	1.08207	2.04749	1.9344	5.51029	3.1067	3.89974	4.20905	3.43916	5.08469	2.25608	3.10202	2.44139	4.44212	2.93593	1.99441	557	-0.165806	0.598631	0.406894	-0.0508819	-0.30496	0.808319	0.40957	1.57757	0.27727	0.316394	0.773395	0.856428	-0.317722	-0.924472	0.413475
558	3.86565	2.14508	0.84419	3.27983	1.24733	1.38	1.17594	1.89411	1.38462	2.42941	1.63359	1.58829	1.53629	0.839337	0.849358	1.01995	0.973503	0.825698	1.21128	1.78089	1.0228	5.26722	2.6556	3.92874	4.24639	3.76473	4.59762	2.27458	3.24677	1.88231	4.26338	3.14259	2.06926	558	0.77182	0.368649	0.837236	0.174353	0.189698	0.805282	0.122186	1.25536	0.312694	0.0705348	-0.674055	0.705366	-0.127608	-1.05719	0.374531
559	4.23668	2.4622	1.10002	3.25036	1.51764	1.44747	1.2701	1.25584	1.43418	2.21874	1.51745	1.70139	1.48701	1.03917	1.59055	0.980985	0.961551	0.70768	1.76143	1.69862	1.82765	4.74904	2.65371	3.63421	4.10898	3.40172	4.69169	2.80204	3.28768	1.57154	4.16828	3.0979	2.01981	559	0.615155	0.668167	0.52515	-0.0205881	0.556084	0.886412	0.0587697	1.3185	0.00566503	0.493378	0.608235	0.875078	-0.179688	-0.323879	0.561835
560	3.93097	2.36882	1.08585	3.18957	1.93135	1.43831	0.595839	1.25756	1.09836	2.32297	1.87101	1.39741	1.68533	0.944847	1.50627	1.07478	0.872666	0.823011	1.14547	1.73803	1.71065	4.90369	2.54016	3.52128	4.01404	3.74555	4.95184	2.19883	3.59904	1.9831	3.8585	2.89745	1.94801	560	0.962308	0.759893	0.415036	0.169621	0.50018	0.832692	0.783753	1.05476	0.214115	0.300572	-0.0569469	0.500704	0.129816	-0.555062	0.694411
561	4.37322	2.21719	0.830033	3.61215	2.16699	0.722851	0.991772	1.43723	1.55296	2.56229	1.61132	1.77809	1.10885	0.976327	1.42503	1.57734	1.27977	0.804071	1.3011	2.1605	1.81346	4.25292	1.96159	3.81189	4.23702	3.90529	4.59571	2.62825	3.48254	2.39576	3.9013	2.91318	1.93565	561	0.611313	0.283179	0.443027	0.149631	0.587803	0.265031	0.530185	0.929719	0.447076	-0.00774072	-0.546091	0.60611	-0.361152	-0.311124	0.0552643
562	4.05796	2.28137	1.12817	3.62378	2.08163	1.1968	0.618669	1.32919	1.14919	2.28048	1.50261	1.89813	1.76101	0.801384	0.909339	1.18465	0.710878	0.667393	1.87215	1.87434	1.81866	4.42361	2.54778	3.89458	3.77109	4.29365	4.99522	2.21044	3.31786	1.94768	3.85142	3.22001	2.09104	562	0.570612	0.556491	0.726467	0.325768	0.652509	0.803687	1.12559	1.04698	-0.0102131	-0.23661	0.118757	0.611145	-0.161647	-0.0138307	0.63078
563	3.71176	1.71747	0.872418	3.91575	1.60812	1.13743	0.591296	1.24822	0.97344	2.5145	1.82371	2.08419	1.9036	1.05686	0.834359	1.24297	1.40795	0.645687	0.976508	2.29481	1.64297	4.70641	3.17983	3.56008	4.30535	3.77065	4.71335	2.57005	3.35761	1.90486	4.11013	3.29728	2.13801	563	0.86958	0.859867	0.463908	-0.58179	0.457706	0.491786	0.718667	1.04311	0.176558	0.0302159	-0.422368	0.870944	-0.0497066	-0.05491	0.482587
564	3.91299	1.97244	0.8148	3.99023	2.2558	1.1004	0.803974	1.4059	1.18424	2.3501	1.75255	1.59132	1.41284	1.10125	0.894902	0.877428	1.17739	0.696272	1.34176	1.48758	1.405	5.00268	2.62701	4.01414	3.71686	3.60167	4.69611	2.48591	3.42534	1.95749	4.05832	3.3232	2.18155	564	1.11042	0.707457	0.437919	0.371196	0.0446017	0.553685	0.454641	0.547021	0.126756	-0.291804	0.342546	0.762092	0.0491905	0.0315471	0.751156
565	3.66635	1.94216	1.01908	3.2281	2.3206	1.29891	0.803083	1.55076	1.19184	2.27494	1.75492	2.01902	1.99522	0.885765	1.05657	1.90199	0.959126	0.0854772	1.58659	2.09286	1.68473	5.37412	3.08156	4.19373	4.37016	3.88031	4.65003	2.32498	3.11671	2.10161	3.8359	3.28978	2.32661	565	0.550534	0.774237	0.731706	0.173844	0.0190972	0.327674	1.11374	0.857092	0.309815	-0.331279	0.260681	0.404382	0.120696	-0.0706951	0.235776
566	3.87098	1.69762	1.08873	3.24463	2.02259	1.10442	0.951524	0.522331	1.31441	1.80303	1.57784	2.03495	1.30837	1.11135	1.15111	1.2929	1.00738	0.602871	1.30429	1.26161	1.59999	4.31736	2.84091	3.87018	3.95661	3.66595	5.28689	2.67778	3.52767	2.2321	4.0806	3.42118	2.26047	566	0.843042	0.496855	0.47718	0.121683	0.351916	0.263418	0.537981	1.14792	0.0171568	0.610008	0.383898	1.05025	-0.0294917	-0.29216	0.171921
567	3.70905	2.24145	0.971767	3.58345	1.32857	1.1037	0.440029	0.705492	0.793455	1.78115	1.82849	1.8446	0.845533	0.816634	1.43338	1.34804	0.567161	0.319426	1.79053	1.75271	1.58056	5.56834	2.70108	4.36605	3.9473	2.73833	5.79612	2.20944	2.82716	2.07473	3.8325	3.7463	2.20065	567	0.820776	0.622844	0.480898	0.227082	-0.0875658	0.546275	0.606476	0.69421	0.163126	0.681744	0.197516	0.750272	0.0433404	0.179814	0.251468
568	3.52862	1.94965	0.842144	3.89671	1.34113	1.10511	1.30271	1.28689	1.32948	2.18297	1.68364	1.66301	1.60475	1.07232	1.24071	1.52186	0.731507	0.47928	1.10033	1.59211	1.13622	6.12936	2.55529	4.08508	4.29221	3.07699	5.15705	2.58702	2.93157	2.00976	3.85048	3.59908	2.1054	568	1.19167	0.240745	0.637432	-0.064041	0.177691	0.691382	0.755506	0.775485	0.442684	0.341789	0.0398447	0.695917	0.320106	-0.381956	0.521819
569	3.29993	1.96387	1.32453	3.2038	1.20423	1.46167	1.7411	1.39256	1.36009	1.93444	1.88376	2.23678	1.2753	1.18878	1.22254	1.06872	1.05609	0.4741	0.522137	1.49829	1.38063	5.71155	2.31554	4.59217	4.04084	3.21051	5.41611	2.24709	2.98564	2.13599	3.63756	3.76294	1.83648	569	0.476758	0.747635	0.66647	0.167323	0.0387669	0.707622	0.789429	1.09938	0.302473	0.293513	0.226456	0.388823	0.00204921	-0.117404	0.204978
570	4.01022	1.81699	0.828702	3.33671	2.11767	1.09549	0.873495	0.927556	1.232	2.12772	2.11361	2.20933	1.23688	0.78717	1.10372	1.16044	0.920824	0.735313	1.81319	2.06737	1.39361	5.78415	2.49677	3.90147	4.08085	3.53779	4.87901	1.93283	2.85933	2.6898	3.79785	3.59372	2.35434	570	1.18519	0.902604	1.14555	0.559389	0.525471	0.698356	0.468542	0.814736	0.482233	0.289767	-0.760103	0.711247	-0.211095	1.08929	0.0434983
571	3.56196	1.84269	0.500989	3.56763	1.66931	1.22626	1.50941	1.43513	1.64342	2.2227	1.13514	1.68718	1.43756	1.10337	1.38305	1.62684	0.712297	0.283239	0.965532	1.28478	1.65561	5.74286	2.66152	3.88805	4.08171	3.59729	5.24314	2.20356	2.53717	2.57766	4.07234	3.38035	2.21433	571	0.968752	0.71161	0.783525	-0.227139	0.728086	0.809636	0.76911	0.798712	0.266257	-0.00544464	0.0326969	-0.54631	0.334342	0.992741	0.272134
572	3.69037	1.49252	0.646581	3.68829	1.79813	1.28558	0.899232	1.31338	1.49463	2.33599	1.68057	1.78654	1.74501	1.05535	1.13379	1.43987	0.612828	0.517622	1.50958	2.21092	1.57845	6.01135	2.49121	4.05567	4.00762	2.85708	4.94437	1.92058	2.95733	2.2813	3.77816	2.97273	2.07363	572	1.19398	0.804874	1.00637	-0.258081	0.553011	0.329554	0.273522	0.644653	0.275354	-0.149431	0.148552	0.186803	0.28461	0.209264	0.577395
573	3.86646	1.79079	1.18077	3.91256	1.82516	1.38054	1.21469	1.43321	1.72141	2.41504	1.00841	1.86758	1.21053	0.958325	1.14217	1.58647	0.488687	0.694927	1.46998	2.09666	1.5908	6.55701	2.86048	3.69569	4.19086	3.20347	5.13673	2.19621	2.52783	1.66506	4.01068	3.12415	2.01577	573	1.11111	0.644488	1.15075	0.264286	-0.158899	0.493944	0.407237	1.0691	0.137639	-0.160608	0.148914	0.4726	1.69359	1.13325	0.225517
574	3.77009	1.71592	1.45872	3.55266	2.72121	1.16256	1.4219	1.5152	1.41141	2.20258	1.74352	1.85257	1.79616	1.01511	0.678631	1.37222	0.881637	0.348116	1.23091	2.0141	1.59341	6.49175	2.5429	4.14433	4.04187	3.46677	6.26282	2.17441	2.85754	2.08062	3.74904	3.1569	2.07586	574	0.78716	0.281801	1.00888	0.0885502	0.260311	-0.930593	0.255683	0.796029	-0.258878	-0.491732	-0.605974	0.67066	1.0301	0.70896	0.173553
575	3.7466	2.1712	1.58761	3.50609	2.56466	1.1912	1.26504	1.33586	1.00574	2.22539	1.85016	1.75724	1.65303	1.03211	0.838573	1.13797	0.750167	0.611935	1.14593	2.09189	1.17489	7.02245	2.7444	4.03993	4.13328	3.18647	5.10271	2.04072	3.21911	2.3821	3.8793	2.84055	2.07381	575	0.627654	0.788713	0.675572	0.336309	0.369121	0.702476	0.099784	0.643839	-0.0263445	0.170669	0.23153	0.884133	0.729735	0.732183	0.285493
576	3.7642	1.85777	1.42072	3.33632	2.48813	1.71329	1.28455	1.59065	0.609954	2.56654	1.66267	1.76135	0.320845	1.10735	1.26462	1.38284	0.774101	0.66785	1.83443	2.22617	1.94435	7.09529	2.86147	3.77594	3.93376	3.66093	5.40546	2.38059	2.97552	2.18401	3.7325	3.3163	2.34044	576	0.727007	0.774654	0.810017	-0.00320387	0.221592	0.548299	0.0287457	1.10501	-0.149621	-0.267846	0.0168272	0.614958	0.652047	0.440515	0.5194
577	3.28404	1.97803	1.2647	3.90705	2.34986	1.88309	1.47137	1.38566	0.68697	1.87643	1.52084	1.49673	0.602821	1.11734	1.36454	1.79359	0.604328	0.338935	1.5835	2.17011	1.38412	8.06776	3.08052	3.72566	4.19402	3.32613	5.36806	2.55562	2.6035	2.15053	3.74805	3.59292	2.16811	577	0.745534	0.748351	1.09732	0.137487	0.542637	0.850336	0.964324	0.692011	0.308959	-0.69595	0.253209	0.316854	0.304055	0.17943	0.81489
578	3.1642	2.07839	1.29233	3.93911	2.15654	1.40397	1.26917	1.32712	0.74703	1.90949	1.35123	2.02344	0.8252	1.16819	1.5588	1.54556	0.56372	0.346066	1.17038	1.9023	1.27773	7.30392	2.80724	3.8621	3.93488	3.31923	3.63173	2.37099	2.92852	2.11218	3.87978	3.58574	2.35565	578	-0.435321	0.955499	0.668653	-0.152243	0.246188	0.400793	0.591445	0.985556	0.0838048	-0.145863	0.577968	0.558653	0.514213	0.494024	0.51615
579	3.93149	1.85968	1.33101	3.29825	2.04137	1.66687	1.29426	0.962309	1.12682	2.01809	1.49164	1.97111	0.462137	1.01745	1.02346	1.29905	0.456931	0.183431	1.0777	2.12045	1.84432	7.8957	2.75609	3.78807	4.33105	3.5711	3.887	2.06951	2.47773	2.30324	3.90444	3.32223	2.18052	579	0.869201	0.581116	0.707077	-0.0525074	0.0681017	0.695678	0.639555	0.848153	-0.101562	-0.0133247	0.127314	0.490652	0.169504	0.195184	0.266412
580	2.96485	1.91788	0.893922	2.70582	1.58072	1.2854	0.986316	1.51175	0.770693	2.03548	1.9782	1.54313	0.848947	1.24525	1.07785	1.09283	0.633866	0.424975	0.752025	1.29573	1.12279	8.00442	2.3782	3.69574	4.16444	3.65251	3.98958	1.93566	2.71991	1.56459	3.83173	3.70923	2.34575	580	0.938389	0.695585	0.910126	0.261697	0.712128	0.750599	0.342264	0.965228	0.106312	0.562787	1.04795	0.41931	0.0404244	-0.0991034	0.515861
581	3.24631	2.05838	1.21574	2.44521	1.93156	1.7313	1.30861	1.68357	1.08185	2.40487	1.73615	1.81978	1.25239	0.887765	0.765676	1.44416	0.802742	0.446831	2.04792	2.00773	1.92709	8.29308	2.77423	3.56382	3.85514	3.79662	4.21188	2.21868	2.89998	2.0103	3.8242	3.4433	2.18443	581	1.15408	0.978001	0.818522	-0.335918	1.2353	0.548296	0.26047	0.72419	-0.245986	-0.0992254	-0.195407	0.509906	-0.0949161	0.404414	0.846318
582	2.96654	1.85374	1.22258	3.33008	1.91077	1.08753	1.16171	1.24291	1.12368	1.50475	1.67436	1.83085	0.940394	1.03575	1.14828	1.38348	0.0341879	0.843498	0.527806	1.50101	1.41012	7.58472	2.60801	2.8375	4.17068	3.86273	5.12908	2.11061	3.11734	1.9809	3.54939	3.35439	3.09106	582	0.728796	0.760603	0.652595	-0.52296	0.449019	0.299438	0.21852	1.20612	-0.230023	-0.255545	0.10296	0.568705	-0.0799749	-0.161059	0.782211
583	2.99333	1.78842	1.06936	2.11254	1.8193	0.810285	1.09496	1.41146	1.36573	2.57381	1.52713	1.71953	0.922955	0.950526	0.765805	1.30056	0.691226	0.433374	1.68802	1.37126	1.51407	6.95079	2.76643	3.29585	4.55779	3.37408	3.8427	1.96191	2.90483	2.06455	3.64052	3.60912	3.03822	583	0.275326	0.696547	0.834078	-0.361205	0.906559	0.691471	0.618345	0.957636	0.0730159	0.513452	0.338974	1.4373	0.00813963	-0.0499282	0.786998
584	3.24965	2.10612	1.08976	3.75707	0.969915	1.1441	1.5591	0.674029	1.15922	2.02708	1.72909	1.31145	0.754798	1.0965	1.23025	1.24343	0.624894	0.714571	1.32446	2.27845	1.92541	7.1311	3.21127	3.85216	4.49354	3.50974	5.13615	1.92247	3.18016	1.90041	3.83138	3.56619	2.52048	584	0.646938	0.751041	0.805339	-0.265586	0.529516	0.740299	1.33608	0.538395	-0.0564016	-0.0875853	0.377827	1.83934	0.473012	-0.0480779	1.06065
585	2.98524	1.63901	0.873422	5.01069	1.88188	1.18631	0.920969	0.125206	1.01036	2.52764	1.98251	1.81348	0.767139	1.04625	1.31322	1.17549	1.08293	0.466864	1.41434	1.70927	2.4803	7.33102	3.04162	2.79702	4.22791	3.32271	4.19364	1.97535	3.13431	1.61011	3.77337	3.3776	2.6164	585	0.855646	0.916556	0.591892	-0.324583	0.659852	0.448338	1.05844	0.993156	-0.170372	0.219161	0.17299	1.19692	-0.214802	-0.368557	0.183564
586	3.23417	1.9246	1.04259	4.79401	1.75327	1.33591	1.25661	0.929978	1.35168	2.30152	1.08204	1.90487	1.11994	1.17689	0.966002	1.16777	0.589119	0.522459	0.979955	2.26327	1.51688	7.20916	3.02835	3.21819	4.3771	3.56411	4.44619	2.11376	3.03436	2.50638	3.79459	3.29809	2.36841	586	0.931847	1.06705	0.740503	-0.0451396	0.56474	0.500985	0.145486	0.792144	-0.115152	-0.2239	-0.764065	1.04653	0.176723	0.142261	0.618714
587	3.28795	1.86857	0.708512	4.80152	1.89931	1.41682	1.21727	0.854777	1.33075	2.19428	1.87253	2.19776	0.9709	0.876675	0.715782	1.62017	1.14823	0.738052	1.93976	2.50057	1.80664	7.06498	3.06972	2.85169	4.03904	3.23781	4.30108	1.30974	2.97753	2.1618	3.78684	3.29164	2.29038	587	0.75929	0.693039	0.629472	-0.0478264	0.515712	0.373528	0.733585	1.06974	-0.286524	-0.282041	-1.05403	0.75168	0.204034	-0.28919	0.465858
588	2.99701	1.89091	1.03873	3.23852	1.16469	1.18884	0.690282	1.20267	0.791865	2.45655	2.03559	2.10655	1.41423	0.895667	0.78812	1.01978	1.08904	0.0642592	1.82039	1.78875	1.9113	6.87115	3.08786	3.31606	4.10538	3.58972	4.93519	1.41525	2.82235	2.45821	3.69788	3.26122	2.3372	588	0.64717	0.957597	0.523658	-0.305163	0.605065	0.0846818	0.527378	0.802145	-0.0655247	-0.427638	0.108975	0.886835	-0.0380669	0.0727128	0.588865
589	3.31591	1.67342	0.663871	4.09108	-0.425077	1.57062	1.42994	1.35364	1.27624	2.52658	1.68584	1.763	1.37888	0.718081	0.986791	1.35157	0.849469	0.549167	1.51893	1.54116	1.67003	7.66786	3.31354	2.78813	4.1549	3.5716	4.92371	1.44633	2.79732	2.18976	4.37213	3.0631	2.22231	589	-0.0386442	0.747048	0.691237	-0.496232	0.635776	0.648477	0.731948	0.862792	0.141531	-0.565567	-0.165497	1.08267	-0.025604	-0.709209	0.285471
590	3.30965	1.71925	0.891559	4.29687	-0.340629	1.05815	1.10789	0.842367	1.07406	2.30035	1.62185	1.39784	1.25679	0.57653	0.769308	1.01609	0.813207	1.13392	1.55812	2.52736	1.95871	6.93852	2.96111	3.29405	4.28155	3.92509	4.39537	1.76484	2.47864	2.2474	4.04758	3.04505	2.03841	590	0.673011	0.624107	0.502347	-0.0614625	0.495795	1.04222	0.80043	1.18327	-0.359303	-0.348428	-1.46058	0.767302	0.0704018	-0.765875	0.3621
591	3.44521	1.57503	0.652031	3.9696	0.801883	1.32038	1.50451	0.923449	0.650221	2.64337	1.97965	1.49019	1.17389	0.91114	0.484864	1.22433	1.23318	0.76961	1.36968	2.31406	2.05169	6.62762	3.0973	2.80694	4.15824	3.77212	5.11904	1.68964	2.59939	2.01067	3.94469	3.20124	1.94346	591	0.540415	1.24696	0.847124	-0.599226	0.644622	0.541241	0.997903	1.27436	-0.1588	-0.143491	0.427458	0.912007	-0.205677	-0.805629	0.750216
592	3.78481	1.73722	0.690688	2.8912	0.787326	1.21241	1.15394	0.780811	0.907442	2.60809	1.72962	2.0391	1.33897	0.920774	0.855848	1.23168	0.745581	0.710785	1.84926	1.67453	2.20217	7.7682	3.23272	2.89864	4.13092	3.9774	4.00791	1.77	2.6077	2.11332	3.71274	2.96353	1.94567	592	0.962238	0.565259	0.537963	-0.0898252	1.31249	0.934991	0.780111	0.715883	-0.0917775	-0.30083	-0.182553	0.904776	-0.187431	-0.677554	0.511933
593	2.82074	1.82944	0.612004	3.27082	0.704653	1.40666	0.72017	0.898556	1.04244	2.19612	1.64794	1.53499	1.4131	0.903139	0.97425	0.742729	0.690934	0.937629	1.5083	2.25722	2.03957	6.51201	3.57676	2.58414	4.05763	3.78972	4.9616	1.84875	2.63508	2.17291	3.6749	3.22684	2.10787	593	0.641726	0.757194	1.27963	-0.643055	1.12739	0.92987	0.714182	0.505762	-0.274576	-0.190857	0.0883693	1.1018	-0.421532	-0.260545	0.672927
594	3.11547	1.67129	0.557651	3.71906	0.925196	1.24099	0.799105	1.53266	1.25014	2.53853	1.60072	1.98671	1.37639	0.920642	0.706195	1.07873	0.672853	1.04714	1.36541	2.15509	1.91413	7.23738	3.0396	2.72177	4.03212	4.08449	4.92048	1.9096	2.45935	1.80158	3.934	3.10002	2.29867	594	0.602875	0.678163	1.17052	-0.535288	0.513825	0.7903	0.554534	1.17383	0.0666189	-0.0747906	-0.393115	0.809258	0.0070368	-0.0512046	-0.553388
595	3.57054	1.83919	0.553754	3.75759	0.73271	1.45236	0.770831	1.28165	1.18708	2.32425	1.89074	1.74873	1.35771	1.08681	1.2479	1.25577	0.607439	1.01755	1.52648	2.5038	1.99572	6.96852	3.00879	2.80725	4.11134	3.74028	4.9534	1.73688	2.08574	2.13957	3.79383	3.07149	2.14852	595	0.584552	0.729805	1.16894	-0.371542	1.1199	0.568811	0.822155	-0.553318	-0.123149	-0.378912	-0.23087	0.388773	-0.113325	0.0467209	-0.71549
596	3.4861	1.62428	0.799475	3.63856	0.973066	1.19222	1.14075	1.28664	1.53543	2.06991	1.24394	1.3927	1.40663	1.09462	0.935929	0.784391	0.547309	1.00936	1.20853	1.96642	2.19639	6.75435	3.2992	2.85553	4.50773	5.22513	4.99057	1.8184	2.56178	1.96637	3.8888	3.52126	2.47843	596	1.04702	0.669659	0.761508	-0.226182	0.779461	1.03604	0.581739	0.199721	0.148328	-0.307318	-0.374631	1.04978	0.215592	0.125855	0.137226
597	3.40211	1.31519	0.681354	3.83639	1.34068	1.37776	0.886142	1.19617	1.24172	2.0489	1.74793	1.88368	1.66977	1.14313	0.527779	1.02591	1.00506	1.25357	0.584155	2.19856	1.87506	7.58029	3.60142	2.76231	4.12569	4.60718	5.71588	1.94525	2.61689	1.90493	3.61229	3.19979	2.45516	597	0.893813	1.14435	0.780506	-0.00692179	0.481933	0.621473	1.00009	0.264789	0.0385421	-0.277477	0.33954	1.13498	-0.002922	-0.142017	0.12163
598	3.28709	1.48305	0.974285	3.66661	0.688097	1.47747	1.31824	1.26931	1.47384	2.39136	1.74587	1.75623	1.09007	0.86695	1.09484	0.917802	0.790276	0.89696	1.52991	1.74707	1.61802	7.19875	3.24121	2.63835	4.06316	4.0943	4.8174	1.8482	2.24717	2.16804	3.71879	2.9772	2.35144	598	0.779279	0.635874	1.07523	-0.248925	0.761615	0.616639	0.587043	0.353435	0.0769365	-0.329986	-0.277992	0.873117	-0.265762	0.165593	-0.137509
599	3.388	1.78489	0.874998	4.11325	0.841351	0.869186	0.831593	1.28705	1.3859	2.41102	1.69243	2.06576	1.31814	1.07931	0.747003	0.985286	0.79972	1.32367	1.38865	2.35707	0.762701	7.2174	4.07604	3.10676	4.16582	4.26494	3.39741	2.10117	2.45433	1.68039	4.00003	2.97962	2.08343	599	0.734902	0.169893	1.03315	-0.755424	0.710698	0.00776752	0.819005	0.993691	0.0451806	-0.198237	-0.437375	1.077	0.227176	-0.317906	0.32461
600	3.54769	1.22224	0.60901	3.7592	0.490489	0.800306	1.25812	1.14313	1.4442	1.89203	1.69584	2.28573	1.29325	1.101	0.675611	1.32652	0.690877	1.59086	1.59133	2.10329	1.80688	6.77245	3.64097	2.29872	3.4547	4.28791	4.19094	1.77161	2.93911	2.04673	3.57339	3.28117	2.76157	600	0.941852	0.501264	0.900733	-0.335568	0.427393	0.699198	0.779327	0.658317	0.0199102	-0.264667	-0.183457	0.898083	-0.224032	0.0675137	0.147569
601	3.63648	1.39284	1.01157	3.7669	0.438186	1.00854	1.1103	1.50366	1.08324	2.16946	2.03925	1.96695	1.76882	0.931142	1.37146	0.851844	0.417521	1.23405	1.51861	2.10277	2.00567	7.02183	3.39116	2.65363	4.16391	3.75203	4.80495	1.58959	2.75304	2.49803	3.6056	3.33403	2.67417	601	0.683218	1.0059	0.605323	-0.390694	0.634705	0.684583	1.09212	0.245074	0.130766	-0.109605	0.788607	1.1903	-0.161439	0.411946	-0.0823895
602	3.2652	1.64426	0.574397	3.86414	0.659848	1.01838	1.44735	1.61879	1.40866	2.26814	1.09014	1.60095	1.55221	1.0394	1.17149	1.23651	0.758667	1.21246	1.27912	2.37926	1.64111	7.23005	3.11982	3.39206	4.04018	4.04691	5.18138	1.49106	2.85195	1.53246	3.92131	3.09422	2.74457	602	0.767858	0.567203	0.11246	-0.406479	0.479626	0.69059	0.682935	0.590339	-0.0301057	-0.475872	-0.0479715	1.04616	0.153674	-0.0698064	0.2712
603	3.64262	1.34779	0.99455	3.67295	0.850678	1.32253	1.45231	1.14673	1.31402	1.9181	1.45068	1.82467	1.36056	0.803554	1.25142	0.843476	0.814238	1.35832	0.884839	2.41489	2.15007	6.75539	3.22273	2.75046	4.17139	4.37616	4.8922	1.87882	2.7323	1.57977	3.89289	3.30315	2.47207	603	0.648151	0.585289	0.471555	-0.336747	0.879782	0.931729	0.82988	0.81263	0.0772705	0.00302321	0.274433	0.505021	0.244485	0.152049	0.0701282
604	3.27634	1.31304	0.775899	3.62422	0.900262	0.843327	1.07197	0.599	1.65203	2.32591	1.53242	2.13278	1.41448	1.03308	1.35805	1.28823	0.910708	1.24061	2.11731	2.28718	1.62369	7.14024	3.27628	2.66532	3.82035	4.23204	4.65611	0.695734	2.58485	1.34543	3.83047	3.2858	2.15461	604	0.542618	0.758962	0.449604	-0.497238	0.525837	0.664857	0.68767	0.807695	0.256588	-0.220903	-0.722726	0.855232	-0.303723	-0.0999349	0.148983
605	3.7003	1.24658	0.536413	3.70751	1.12455	1.55682	0.999938	0.750241	0.54062	1.77953	1.95898	1.69961	0.97439	1.1612	1.41402	1.50164	0.91314	0.889766	1.75131	1.82264	1.35879	7.15208	2.98232	3.01998	4.29145	3.97479	4.48366	0.984311	1.88319	1.75113	3.6438	3.18819	1.85638	605	0.976529	0.447464	0.883526	-0.325769	0.918915	0.684903	0.442332	1.1382	-0.113725	-0.219559	0.518724	0.923624	-0.0603917	-0.648729	0.477765
606	3.32067	1.60067	0.513492	3.34367	1.03874	1.03231	1.25863	1.75039	1.41638	1.92531	2.22933	1.20989	0.400353	0.757318	1.45776	1.24084	1.1767	1.14934	1.67586	1.88797	1.50031	6.97731	3.35358	3.04017	4.1853	2.85765	4.54122	1.61523	2.19575	1.95342	3.66488	3.44658	1.84753	606	0.492181	1.17287	0.841951	-0.139786	0.883682	0.989029	0.75602	1.15423	-0.182932	0.0724296	0.233727	0.963712	-0.238884	-0.546242	0.295383
607	3.29275	1.25204	0.651478	3.62197	1.46824	1.31071	1.30412	0.945656	1.34089	1.71997	1.45214	1.50552	1.88009	0.969455	1.02726	1.20657	0.994933	1.48914	0.993105	2.02492	1.88056	7.42848	2.29346	2.53685	4.26289	3.77337	4.87149	1.55361	2.52172	1.51223	3.84494	3.83576	1.95994	607	0.827553	0.711485	0.668689	0.137378	0.73604	0.0601376	0.715643	0.211424	-0.128447	-0.35406	0.353441	0.62426	0.0901202	-0.776788	0.538307
608	3.41478	1.3971	0.60056	3.27483	1.11423	1.20574	1.15436	1.26909	1.20707	2.16785	1.3749	1.86876	1.34769	0.912489	1.55193	1.64153	0.902167	0.942746	1.25586	2.22691	1.71367	7.37311	2.76637	3.22476	4.18935	3.86688	4.95235	1.82872	1.83173	1.78101	3.28445	3.77376	2.00152	608	1.20729	0.863271	0.226968	-0.274399	0.34837	0.360897	0.716528	0.534745	-0.0963683	-0.213213	0.413482	0.752841	0.224039	0.190001	0.184269
609	3.49532	1.80974	0.687522	3.77362	1.28688	0.572563	0.621654	1.24594	1.47257	1.93582	2.2211	1.96421	0.991538	1.12419	1.51231	1.49749	0.869041	0.783947	1.36334	1.91489	1.39609	7.2529	3.08584	2.62186	4.08697	4.10002	3.97247	1.93849	2.32741	2.00533	3.44343	3.39104	2.0267	609	1.13618	0.865053	0.408779	-0.0432344	0.607134	0.45299	-0.231171	0.961422	0.0476554	-0.303253	-0.556897	0.683072	-0.555036	-0.145063	0.544622
610	3.54055	1.23493	0.75641	3.62572	1.26475	1.33646	0.767171	1.47003	1.13338	2.14691	1.68839	1.95756	1.34923	0.987327	1.44089	0.541462	1.07988	1.12362	1.30206	2.00911	1.47525	7.07083	2.95758	2.85291	4.11011	4.20768	4.17035	1.99716	2.38106	1.82429	3.35578	3.67181	2.09062	610	0.968424	0.950538	1.03387	0.0426498	0.548825	0.278287	0.567179	0.696996	0.0956749	-0.19433	0.754481	0.51235	0.257791	-0.209916	0.210462
611	3.6118	1.18163	0.276469	3.86195	1.36117	0.752736	0.956392	1.23563	0.744379	1.92126	1.75166	1.71024	1.16913	0.852733	1.09355	1.5706	1.10523	0.951294	1.41511	1.89662	1.11592	6.57401	3.33473	2.58266	4.2678	4.24186	4.5098	1.82446	2.49803	2.0245	3.53346	3.45962	2.11207	611	0.540966	0.631538	0.3463	-0.0421692	0.181466	0.53636	0.671056	0.624857	-0.167645	-0.449392	0.40425	0.776202	-0.0987874	-0.221038	0.204515
612	3.48193	1.00038	0.659524	3.12902	1.6244	1.03863	0.975478	1.02737	1.31877	2.30008	1.94341	1.87159	1.477	0.797636	1.26531	1.28208	0.822872	0.871239	1.37479	1.90446	1.9148	7.28175	2.75675	3.16843	3.88837	3.98941	4.22546	1.96266	2.54128	0.951066	3.30053	3.28902	2.28327	612	0.294062	0.57666	0.523178	-0.247266	0.114508	0.685026	0.322564	0.64025	-0.14303	-0.470315	-0.582075	0.918794	0.0485007	-0.475449	0.17378
613	3.46089	1.81981	0.563881	3.83469	0.386481	1.36856	1.31426	0.832349	1.69898	1.82014	2.064	1.79258	1.13872	0.999382	1.12723	0.881192	0.878543	0.706794	1.41116	2.11186	1.74823	6.52499	3.19192	2.80904	4.15961	4.01552	4.26291	1.90316	2.40713	1.25755	3.42822	3.02229	2.00238	613	0.457165	0.609087	0.514127	0.137056	0.273221	0.44746	0.163828	0.862033	0.253121	-0.314616	0.750756	1.08439	0.093659	-0.221775	0.233098
614	3.58884	1.03913	0.453702	3.78083	0.130675	1.29074	1.06008	1.0128	1.1269	2.0942	1.50794	2.02967	1.34218	0.836668	0.923113	0.752383	0.756685	0.753263	1.26639	1.43342	1.48917	5.92156	3.12109	2.78772	4.30276	3.91978	3.87114	2.042	2.88732	1.37236	3.60896	2.86117	2.19219	614	0.467827	0.622943	0.575514	-0.211197	0.282182	0.275938	0.0383701	0.475284	0.557535	-0.225092	0.56783	0.707816	-0.165637	-1.11246	0.325895
615	3.52386	1.31123	0.652023	5.22977	0.737933	1.39967	1.01981	1.26447	1.4388	2.31662	1.59155	1.9309	1.13971	0.968776	1.0059	1.07294	0.652134	0.651656	1.58816	1.71857	0.592064	6.24758	2.90004	2.85005	4.34872	3.96394	3.3388	1.80153	3.11065	1.30795	3.51726	3.1161	1.44919	615	0.194506	0.821284	0.66495	-0.123875	-1.0177	0.809633	0.644742	0.175827	0.473057	-0.323028	-0.0524133	0.672582	0.347605	-0.365403	-0.982644
616	3.24363	1.63698	0.158073	5.10512	1.16417	1.21396	1.31097	2.38486	1.00652	2.38132	1.92129	1.97444	1.29671	1.14398	0.903602	1.25564	0.923463	0.992294	1.05769	2.23348	1.53425	6.8265	3.40929	2.41485	3.93128	3.62102	3.31242	2.14301	3.27311	1.95023	3.46285	3.29299	1.68931	616	0.643612	0.68959	0.798477	0.0958061	-0.417777	0.872224	0.806322	1.01882	0.319211	-0.341621	0.903136	0.361651	0.56248	-0.511627	-0.220047
617	3.58339	1.15331	0.411926	5.19304	1.27933	0.892616	0.863047	2.37145	0.86325	2.05997	1.5807	1.86389	1.51429	0.707822	1.2744	1.00396	0.857151	1.32008	1.71725	1.98426	2.06749	5.99691	3.49807	2.4526	4.18933	3.76147	4.72188	2.11925	4.03372	1.7598	3.72433	3.24655	1.61792	617	1.07739	0.687105	0.391877	0.156776	-0.148094	0.473374	0.482126	0.699998	-0.0658746	0.189757	0.025919	0.126925	0.418465	-0.0689977	-0.0334596
618	3.32718	1.67185	0.17935	4.49994	1.42459	1.23582	0.883307	1.7667	1.06409	2.09884	1.87213	2.18774	1.40827	0.817765	0.948198	1.16857	1.25936	1.02025	1.5293	1.98153	1.3285	6.36885	2.91222	2.24692	4.21285	3.79123	4.71789	1.95536	3.88544	1.89253	3.62552	3.27801	1.73354	618	0.624898	0.961225	0.533241	0.0892378	0.120758	0.836563	0.262696	0.95208	-0.305199	-0.457879	0.462173	0.518656	0.382646	-0.172534	-0.160909
619	3.52118	1.06434	0.637676	4.01845	1.57247	1.20259	1.27972	1.37135	0.927104	2.19944	1.18107	2.02207	-0.0213838	0.825196	1.22293	1.09472	0.872838	1.20146	1.51181	2.17761	1.38736	6.47936	2.73803	2.85516	4.06212	3.75875	4.29978	2.39253	3.42235	1.95493	3.46449	3.39559	2.79864	619	0.863038	1.01952	0.768159	-0.0262924	0.540754	0.77082	0.592896	0.267162	-0.566712	0.0119081	-1.36292	0.466995	0.0313938	-0.281042	-0.0627984
620	3.1116	1.15735	0.460441	3.89138	1.33916	1.3899	1.05471	1.30205	1.2225	2.12274	1.47578	1.90404	0.930421	0.979316	1.19879	1.32471	0.385888	1.30705	1.24996	1.94703	1.70162	6.54561	3.58571	2.34253	4.16893	3.99391	3.69851	2.07771	3.22541	1.82083	3.69127	3.18991	2.9163	620	0.779238	0.571299	0.882303	-0.480419	0.0754782	1.25664	0.48013	0.0531274	0.294677	0.130222	0.245478	0.492208	0.032922	-0.200527	0.0385627
621	3.17051	1.3962	0.339982	4.04691	1.58923	1.56472	1.1956	1.29267	1.09643	1.96773	1.28495	1.49868	1.00304	0.928762	1.58199	1.44163	0.560843	0.851456	0.91888	1.7259	2.10388	6.09585	3.73483	1.63085	4.45779	3.79506	3.9302	2.1677	3.02459	1.76416	3.84941	3.13138	2.47654	621	0.361695	0.884929	0.567991	-0.0907207	-0.156734	0.684651	0.884915	0.482246	0.130944	0.300778	0.896313	0.87275	-0.0309624	0.303639	0.219851
622	3.63283	1.42754	0.206546	4.42955	1.68389	1.73666	1.42127	1.5884	1.04972	2.11037	1.28213	1.95465	1.20169	1.02224	1.56882	1.62772	0.76949	0.927603	1.75217	1.32951	1.50345	6.49929	2.88887	2.32302	4.45897	3.79607	4.38494	2.21076	2.83039	1.77714	3.62182	3.46965	2.46579	622	0.792053	0.835617	0.8704	-0.77861	0.0958282	0.653694	0.423446	0.656067	0.0876895	0.197626	-0.232046	0.676526	0.233716	0.0914399	0.419895
623	3.41117	1.10656	0.455174	4.5252	1.64555	1.05217	1.45346	1.49322	0.736201	2.48964	1.51217	1.91703	1.30757	1.18792	1.50572	1.22643	0.62306	0.989925	0.994433	1.61898	1.9145	5.70367	3.21013	2.22717	4.30188	4.18814	4.80197	1.79751	3.21648	1.93763	3.30044	3.16228	2.12701	623	0.75151	0.706014	0.692751	-0.225842	-0.43501	0.511523	0.482221	0.388613	0.0902032	0.276897	0.567038	0.832397	-0.118536	0.0072343	0.215362
624	3.18778	1.19357	0.761125	4.11636	1.45152	0.878095	1.15573	1.29069	0.952931	2.53787	1.70628	1.96972	0.970669	0.628829	1.3002	1.34441	0.551165	1.06398	1.26161	1.94236	1.63574	6.04613	3.02824	1.83462	4.63648	4.04465	4.93651	2.78025	3.24467	1.64171	3.35866	3.1642	2.51242	624	0.257411	0.648422	0.403802	-0.427089	0.127592	0.491091	0.582795	0.584585	-0.151406	-0.139512	0.112887	0.368496	-0.0300082	-0.459051	-0.715994
625	3.07609	1.11288	0.89949	3.77688	1.4716	0.964986	1.40884	0.80366	1.10419	2.12123	1.68128	2.11276	1.28745	0.945467	1.22698	1.00577	0.789794	1.02438	1.56149	1.88358	1.72471	6.43436	2.60202	2.40922	4.60492	3.87961	4.43676	2.33832	3.07432	1.38818	3.69463	3.08355	2.05547	625	0.800022	1.06375	0.565204	-0.889469	0.120309	0.310857	0.770063	0.320055	0.0110804	-0.338364	0.260003	0.448227	-0.309435	-0.137495	-0.29886
[truncated: 10 more columns]

## Sheet: Fig 4B
Source Data	Figure 4B	ASH VGLUT-pH Data: individual dF/F(%) traces
		Three trials per animal: Read from left to right; Trial 1 signifies a new animal
		Acquisition Rate: 5 Frames/sec
		Pulse 1		Pulse 2		Pulse 3
		Stimulus On:	Frame 150	Stimulus On:	Frame 300	Stimulus On:	Frame 450
		Stimulus OFF:	Frame 200	Stimulus OFF:	Frame 350	Stimulus OFF:	Frame 500
	wt																																											unc-13(s69)
Frame / Trial #	1	2	3	1	2	3	1	2	3	1	2	3	1	2	3	1	2	3	1	2	3	1	2	3	1	2	3	1	2	3	1	2	3	1	2	3	1	2	3	1	2	3	Frame / Trial #	1	2	3	1	2	3
1	-0.152001	2.84846	-0.278559	-0.597816	0.294031	0.0357018	-1.29549	2.08711	0.404398	-0.198939	0.548058	-0.0344869	-1.62455	-0.0762024	-0.508167	-1.79322	0.0180504	0.609008	0.349596	-0.212323	0.0816465	0.973321	-0.0295351	-1.19234	-1.57762	-0.346368	0.076943	-1.13367	0.329534	-0.160748	-0.633349	0.207196	0.338507	0.199917	0.265384	-0.663958	1.06376	-0.054159	1.08685	-0.476696	-0.680879	0.594785	1	-2.54808	-6.04713	-3.58311	-2.13789	-1.40515	-2.28887
2	1.90273	2.22957	-0.0474442	-0.366237	1.14878	0.410353	-1.5017	0.602015	0.330889	0.633251	0.249675	-0.272342	-2.04008	1.49026	-0.413813	0.355902	0.0434169	1.77382	0.0479669	-1.23221	0.132741	-1.10426	1.15154	-0.98903	0.310463	-0.349454	-1.10208	-1.69253	-1.44902	0.418343	-1.21453	0.227145	-0.669169	-0.325561	-0.675596	0.733053	2.75312	1.68111	-2.14114	-2.14459	-0.643797	-0.796628	2	-2.95541	-4.65195	-5.23403	-0.734688	0.269273	-2.50592
3	0.853649	1.39137	0.376474	-0.101739	-1.01999	1.126	-0.301078	1.43682	-1.53147	0.987885	1.30697	1.24164	-0.572285	1.71373	-0.747442	-0.855706	0.27791	-0.031723	1.22453	0.418543	0.369993	-0.614263	0.418773	-0.568799	-0.256566	-1.31126	-1.35667	-0.973585	0.0650636	-0.178738	-0.312856	-0.172379	-2.01132	-0.616967	0.263478	-0.249745	1.16641	-1.31254	0.279495	0.0529871	-0.396581	0.839252	3	-2.68651	-3.75394	-3.68505	-0.281662	-1.06514	-2.9319
4	-0.451007	2.52261	-0.740587	-0.592571	0.423274	-1.08426	1.06784	1.39145	-0.555166	-0.0117027	-0.217234	1.05124	0.142485	0.0264178	-1.18184	-0.0657431	-0.352219	0.430411	0.340606	-0.0324027	0.912655	-1.07742	-0.631333	-0.243427	-0.638419	0.0360185	0.135347	-1.19835	0.196606	-0.938637	0.032826	-0.166107	-1.72946	-0.0987475	-0.577934	-2.11939	0.155917	-1.11774	1.3621	-1.02173	-0.211802	1.33722	4	-1.99685	-3.82295	-5.25117	-0.562539	-2.34506	-3.17442
5	1.75899	1.9457	0.00480244	-0.724672	0.52311	1.54937	0.0926837	0.66211	0.501629	-0.199163	1.46803	1.27381	-1.7285	1.43568	-0.210996	-1.34958	-0.393912	-0.387035	-1.48967	0.302436	1.59492	0.043628	1.76887	-1.43585	-1.85516	0.394128	0.48193	-1.07254	-2.66189	-0.285516	-0.919806	0.277917	-0.342524	0.394191	0.540542	0.295266	-0.932174	1.95429	0.368078	-1.56693	-0.574545	2.30033	5	-1.84007	-3.0305	-4.73896	-0.779317	-0.261816	-0.647618
6	1.79354	-0.153868	-0.239912	-0.463654	-0.276755	0.767693	0.816947	2.12305	2.02061	1.26122	-0.444125	0.594099	-0.978188	0.916062	-0.853109	0.723097	-0.648466	0.969542	0.676381	-0.709456	-1.83124	0.435336	0.221992	-1.92513	1.02202	-4.2237	0.13949	-1.71858	-2.20782	0.361287	-1.40583	0.867828	-0.5968	-0.747438	0.532716	-1.03586	0.320171	1.63206	-0.178454	0.0528528	-0.432129	-0.167998	6	-1.3928	-3.78675	-4.01097	2.24051	-0.495221	-4.00562
7	0.612779	3.91647	0.916731	-1.48035	-0.727027	-0.89912	-2.03519	1.63532	0.158835	-0.541182	0.195775	0.980648	-1.77333	1.14717	0.541948	0.947496	0.919273	0.298142	0.51323	-1.60549	1.08104	0.12376	-1.08942	-0.844143	-0.0892136	-1.08419	-0.959549	-0.678735	0.824352	-0.735591	0.00752736	0.903839	0.503448	-0.0718612	-0.738375	0.532822	1.74667	1.4868	0.872796	0.520112	-1.61297	0.324844	7	-0.505892	-2.75251	-5.02745	1.94714	0.95574	-3.10678
8	2.29305	1.50627	1.00561	-0.549119	0.908261	0.716664	-0.31875	-0.855253	-0.231054	0.724893	0.794693	0.570808	-1.5138	-0.415826	0.488746	-0.470277	-0.568404	-1.27396	-0.704418	-0.688477	-0.89761	0.59509	1.21844	-0.625068	-0.555423	-0.0862719	1.34152	-1.04706	0.871067	-0.192229	0.17217	2.05987	0.407864	-0.483603	-0.501962	0.0119161	2.29621	-0.579166	0.159144	2.06872	0.69455	-0.316276	8	-0.718671	-3.23397	-3.06999	-1.65258	-1.3573	-4.03657
9	-1.4085	2.1694	1.03385	-1.84363	0.220187	0.63096	-0.23383	0.106807	-0.379318	1.73935	0.17829	-0.478233	-0.933009	0.945735	-0.15535	0.421149	-1.37202	0.0299972	-0.346906	-1.32614	-0.486207	-0.108336	-0.161328	-1.30354	0.615791	1.65847	-0.796643	-0.676252	0.229225	0.165111	-1.53324	1.10149	-2.65035	0.378975	-0.163449	0.782843	-0.333053	1.67602	0.91469	-0.679851	-0.433356	1.74094	9	-1.95398	-2.66358	-5.13306	-0.359926	-0.561131	-2.9719
10	1.82104	1.92106	-0.00253211	0.382355	0.0511126	0.767914	-0.591346	1.96985	-1.35298	0.00817449	1.5059	-0.67945	-1.02802	-0.352312	-0.291239	0.492574	-0.884238	-0.424066	0.508364	-0.26346	0.398589	-0.225611	0.821715	-1.7016	0.749784	-2.50452	1.10901	-1.02619	-1.99669	1.46163	0.834283	1.1938	-1.90094	1.25515	1.41701	-0.334698	1.08624	0.366507	-0.353786	-1.88883	0.484602	1.35505	10	-1.68196	-2.65787	-6.48334	0.597069	1.25718	-2.23483
11	0.84762	1.43814	-0.281476	-1.07854	-0.282821	1.18904	-0.24212	-0.0656153	0.768881	0.253176	0.359293	0.11786	-1.99899	0.724919	-3.36873	0.712169	-1.07894	0.756299	-1.47597	-1.48026	-0.141517	-0.493715	1.18951	-1.37388	-0.0258363	0.394795	0.288171	-0.684449	0.935587	0.258972	-0.855561	0.861721	0.556647	0.666061	0.45114	-0.205107	0.962917	2.56272	-0.1468	-1.11458	-2.21425	-0.75707	11	-0.734733	-2.03965	-5.43985	-0.124432	-1.30908	-2.11057
12	0.604534	2.58423	0.445617	-2.37633	0.343532	1.14244	-1.92768	1.45242	-0.0999814	0.339936	-0.183858	0.505271	-0.111624	0.361532	-2.4814	1.02156	0.744711	1.14778	-1.10264	-0.438284	-0.131647	-1.36385	-1.46023	-1.06402	0.0316562	-0.636824	0.94597	-0.875	0.34165	-0.209187	-0.1123	0.336439	-0.74003	0.140889	-0.29779	-1.4351	1.6912	3.40478	-2.23807	1.16075	0.511072	-0.237457	12	-1.50959	-2.04658	-4.91844	-0.966078	-0.118933	-4.10607
13	0.618784	0.0425034	-0.647538	-1.46832	1.43878	-0.276708	-0.333006	-0.45978	0.0170549	1.13817	0.0746565	1.16406	-1.29709	1.59736	-0.695908	-1.26014	0.79673	0.425506	0.498628	-2.6399	-0.56523	-0.183852	0.0378126	-1.14137	-0.448276	-2.18439	-1.10773	-0.418936	0.293806	-0.532281	0.568465	0.218523	-1.67334	-0.209803	0.632725	-0.917586	1.70474	-2.54146	-0.921924	-0.910276	1.22378	-0.613637	13	-0.785684	-1.51778	-5.26965	-0.59746	-0.672117	-2.27434
14	1.5153	2.65324	0.806052	-2.94643	-2.2726	0.0393578	-0.657452	-1.06983	-1.21021	0.230665	-1.01314	0.159502	-1.49526	-1.0213	-1.08505	-0.523152	0.841196	0.970175	-0.543168	-1.6722	1.51586	0.447767	0.00119154	-0.634058	0.255496	-0.290457	-0.608285	-1.24476	-0.284172	0.251796	0.493149	0.654766	-1.50921	0.366118	0.0664237	-1.03651	-1.93073	1.65127	-0.391334	-1.71466	0.836331	-0.994011	14	-1.13181	-1.62935	-3.77979	0.136797	-0.316224	0.0645026
15	2.33265	2.16345	0.893064	-1.44645	-1.71304	0.614119	0.299102	1.48628	-1.26938	0.305181	0.39029	0.186658	0.277972	1.51383	-1.63517	0.572419	-0.599035	1.03613	-1.12886	-0.943656	-1.80081	-0.227173	-0.197071	-0.6013	-0.626135	-0.159475	0.254617	-1.90918	-1.81743	0.166932	-0.0729909	0.970924	0.733911	0.372592	1.56156	-1.14979	1.09412	0.277272	-1.46209	-1.3922	3.11089	-1.96813	15	-1.775	-1.66494	-3.22052	0.405524	-0.504985	-2.17516
16	1.23926	3.27552	0.165666	-1.66423	-1.63481	0.430261	-0.596883	0.30906	-0.254368	1.51182	0.0405239	0.148783	-0.455109	1.42106	-0.370883	-0.400568	-0.39401	-0.974729	-0.499722	-1.58704	-0.252149	-0.693296	1.28431	-2.30749	0.387303	-0.88184	-0.756772	-2.58913	-1.65718	0.115083	-1.27141	1.28937	0.759373	0.0620445	1.32665	-0.760154	0.51744	1.82725	-0.565251	-0.628044	-1.3096	1.6426	16	-1.93672	-2.57804	-3.05681	-0.760735	-0.361391	-1.16809
17	1.77856	0.644629	1.15675	-2.79311	1.48465	-1.11509	0.00640925	-0.468466	0.350045	1.45772	0.439422	-0.39305	-1.37413	0.405766	-1.5444	-0.344279	-1.60276	-0.592271	-1.01802	-0.346212	0.298626	-0.0445449	0.950495	-0.640221	-0.289834	-2.16112	0.426607	-1.81273	0.175694	0.411564	-0.773439	-0.166289	2.24779	0.369234	1.33516	-2.23163	2.70251	1.64751	0.990896	-0.187872	0.219623	-0.51075	17	1.51221	-0.229353	-3.72274	0.395245	-3.92305	-1.91398
18	-0.876018	1.53531	-0.403359	-2.3617	0.405092	0.920177	-0.0646611	0.898474	1.22969	0.580303	0.304857	0.499357	-0.2409	-0.409727	-2.00559	0.412595	-1.92398	-0.160365	-0.746709	0.668044	0.364943	-1.39586	0.395792	-0.037496	0.160475	-2.0349	-0.0626627	-0.843657	-0.283307	-0.382325	1.02884	0.929373	-0.3594	-1.15802	0.106832	-0.687179	1.67627	-0.812365	-0.605031	-2.23014	3.23401	2.80651	18	-0.563998	-1.94704	-4.14229	0.442123	-0.79623	-3.49971
19	1.32927	2.15041	0.079823	-1.29477	0.656401	-0.356956	-0.576778	0.746563	-0.710286	-0.575207	0.108736	1.84651	-0.849433	0.728957	-1.81512	-1.00875	-0.924305	-0.214225	-0.16558	0.070002	-1.3151	-1.01299	-0.0724939	-1.45724	0.933683	-1.05847	-0.821151	-1.33267	0.0831099	1.34797	-0.407913	0.581879	-2.07144	-0.272707	1.00055	0.178111	1.18074	-2.55329	0.282324	2.57804	0.224826	1.05642	19	-1.77613	-0.802286	-3.02231	1.28097	-0.938569	-2.92408
20	0.838325	0.486208	0.128982	-1.2819	1.38877	1.17551	-0.605415	1.34056	-1.86881	0.784179	1.03465	-0.25659	-0.795318	0.0737026	-2.05743	0.424106	-0.122398	1.39494	0.154093	-0.534479	-0.962255	-1.64355	-0.695537	-0.780332	0.488148	1.69615	-0.6909	-1.69311	0.125875	1.73288	-0.601899	0.760894	-0.749785	-1.22912	0.644031	-0.905139	1.51145	0.46079	0.573721	-2.64952	1.17544	-0.275427	20	-0.665508	-3.48963	-5.83053	-0.575634	-2.06009	-2.57759
21	1.54643	3.03012	0.987097	-1.45827	-0.43184	0.681762	-0.798983	0.18086	1.5162	-1.1961	-0.802026	-0.0186586	-1.74516	0.391909	-2.02718	0.0797193	-0.178645	-0.142378	-1.29117	-0.872098	-1.08146	-1.36441	0.389046	-0.153723	-0.953371	1.60318	0.294452	-1.34016	1.36776	0.0782636	1.42947	0.542763	-0.481561	-0.880575	-0.960957	-0.934949	0.746617	2.81541	0.226345	-0.240994	-1.34069	-1.87446	21	-0.476033	-4.03648	-5.30829	0.116461	-0.364854	-1.42265
22	1.07064	0.957526	0.181225	-0.813744	-0.136455	0.622785	0.980094	-0.125512	-0.210514	0.207959	0.560393	1.53812	-0.405247	1.32577	-0.780704	0.596657	-1.3336	0.810543	-1.38578	-0.0760813	-0.327507	-0.783718	0.132853	0.0194585	-0.163388	1.3013	-0.657678	-0.494429	-0.120481	1.28498	0.255391	0.244267	-1.01359	0.364981	0.47964	-1.36841	1.19553	-0.0331887	0.688536	0.247042	0.508639	-0.22703	22	0.796683	-4.94636	-3.93198	-0.651201	-0.729148	-0.653117
23	1.63506	0.952214	0.620808	-1.84078	-0.663448	-0.431639	-0.917206	2.02153	0.364979	-0.0702109	0.996095	-0.0931744	-0.143998	0.386245	-0.127294	0.325951	-0.134886	0.537641	-0.848387	-0.00755561	-0.934659	-0.671913	-0.503962	0.841492	-0.100451	1.16352	-1.03331	-1.53709	-0.735923	-0.768314	0.586646	0.0846351	-0.714254	-0.542543	-0.882736	-0.947807	1.98411	1.23648	-0.554422	-1.82809	-1.37457	1.3868	23	0.748832	-2.83853	-5.31877	-0.835937	-0.658016	-0.926349
24	0.502385	1.04902	-0.438521	-1.23479	0.699641	-0.253896	-0.0364614	-1.2014	0.452997	-0.240309	1.06126	0.454089	-0.665287	0.681793	-2.11964	-0.632306	-0.778475	1.03391	-1.60049	-0.773677	-1.11676	-0.971525	0.0680552	-0.735321	-0.0211352	-0.921352	-1.17595	-0.409903	-0.629158	0.456948	0.414202	0.127596	0.268879	-0.0884267	0.30042	-0.0457512	2.28278	1.3454	-3.38246	0.672504	1.57636	0.143057	24	-0.0264306	-3.119	-4.88082	-2.00624	-1.75224	-2.82295
25	0.743071	1.24458	0.541124	-1.9867	0.834408	0.81341	-1.10494	-1.91915	-0.580953	1.32655	0.276082	0.0614457	-2.2259	0.990704	-2.8035	0.293436	-1.38683	0.7584	-1.03168	0.149134	0.837113	-0.433979	0.861242	0.248416	1.05406	0.203399	0.063678	-2.73582	-0.024839	-0.455738	-0.0342254	0.84345	0.692257	-0.766211	0.331061	-0.811871	-0.0221021	1.02232	0.555406	0.64822	-0.385829	0.384778	25	-0.482235	-1.58869	-4.85121	-0.639579	-1.38254	-2.108
26	-0.483079	0.885227	0.54929	-1.6785	0.759424	1.34692	0.359736	-0.92589	-2.09878	0.691203	-1.2616	1.74153	-1.08848	0.322754	-0.77268	-1.36235	0.191299	0.515872	-0.584171	0.207492	0.722155	-0.996599	0.29225	-1.17346	-0.224265	1.59381	1.88085	-1.98918	0.964151	1.42722	-0.366582	-0.811276	-1.06742	-0.593554	0.418511	-2.33497	1.8689	-0.935903	1.28662	0.554012	-2.75263	-1.0442	26	0.646358	-3.75113	-2.46572	1.75297	-1.41016	-0.384836
27	1.26154	1.17286	0.284121	-2.17141	0.259753	-0.901077	0.486791	-0.300729	-0.126985	0.0359523	-0.624441	1.16981	-1.68652	2.11504	-1.45587	-0.566662	0.427412	-0.475756	0.637187	-0.44264	1.58935	-0.0456971	0.509974	-0.478164	-1.5384	0.484715	-0.774245	-0.868778	0.0103813	0.227323	0.438	0.0461585	-0.70819	-0.925734	-0.0942023	-0.210811	1.43148	2.05798	-1.17503	0.167964	-0.376488	0.682088	27	-2.41645	-3.33079	-2.78073	0.788544	-1.32884	-2.29098
28	1.76029	2.75708	0.954904	-2.11997	-0.625077	-0.0195308	0.234989	-0.170476	0.76998	0.743684	-0.376132	1.17141	-0.52271	1.07535	0.122633	-1.33308	-0.213288	1.42787	-1.00652	0.123236	-2.30352	0.238455	-0.304173	-1.07232	-0.598932	1.6329	0.910689	-0.616718	0.634043	-0.71638	-0.936948	0.334592	0.775871	-0.343362	0.0337236	0.588536	0.510435	2.03104	-0.329828	-0.249383	-0.0112354	0.311538	28	-2.11844	-3.10398	-4.75062	-0.208053	-1.36404	-3.11332
29	1.57034	1.24001	-0.435704	-1.2292	-0.91478	0.653854	-1.02708	3.39824	1.53268	0.51501	-0.386154	1.15644	-2.42945	0.221898	-0.868194	0.280261	0.654758	0.550185	0.448752	-3.08171	1.8353	-0.338725	0.236899	-0.142858	0.105264	0.0548777	-0.454876	-2.08051	0.173116	-0.107233	-0.451559	1.04128	-0.0383392	-1.60607	-0.704466	-0.98474	1.39114	2.59134	-0.509953	0.463671	-0.232768	-0.411629	29	-1.94753	-10.7734	-2.41836	1.07093	-2.48001	-3.35085
30	0.336283	1.83828	1.24865	-1.04814	-0.864114	-0.633637	0.142782	-0.0111787	-0.000719538	0.0564395	-0.583847	1.25679	-1.33589	0.962085	-0.0315593	-0.543173	-0.720144	-0.344645	-0.397908	-0.114238	0.857654	-0.507853	-0.199555	0.0101488	0.266364	-0.775286	-1.33713	-0.948779	-0.0666501	0.527918	-1.16652	0.736462	1.13935	-0.185098	-0.299259	-0.278738	0.600141	2.55693	-0.740816	0.439321	-1.21244	2.1113	30	-2.75049	-0.914426	-3.27696	0.959059	-1.08481	-2.64335
31	1.29957	0.281562	0.0474913	-1.41796	-0.252596	0.00731532	-0.112993	0.110337	-1.14293	1.05826	-0.0103004	0.723815	-0.647558	0.1383	-0.596378	-1.85285	0.130552	-0.436375	0.69103	-1.34349	-0.635921	-0.186297	-0.0956121	-1.33078	0.978057	0.38788	-1.77102	-1.82916	0.169671	0.566368	0.138542	-1.18549	-0.276042	-0.69898	1.42314	0.816033	0.555182	1.50573	-0.426211	1.45067	-0.742291	-0.442157	31	-0.562985	-2.96977	-2.57756	1.36446	-0.365597	-2.10658
32	0.358068	0.291794	0.278855	-1.33539	2.29777	-0.181872	-3.14838	0.63634	0.954483	0.727679	0.549654	-0.21865	-0.523598	1.92103	-0.762062	-0.629088	0.383399	0.530761	0.231381	0.0331391	-0.911951	-0.579477	-0.978322	-0.473475	-0.180188	0.926322	0.0467287	-0.327477	-0.672707	0.580182	-1.64397	-0.767898	-2.17174	0.736584	-1.66555	0.0190065	0.875937	2.5614	1.49043	-0.429814	-0.733627	-0.884717	32	-1.00713	-3.15057	-2.58329	-1.89534	-1.24435	0.577213
33	1.95315	1.23334	0.0994758	0.117946	-0.0886161	0.0669737	-1.3243	1.77357	0.305329	0.899691	-0.193849	0.623702	-1.00479	1.39065	-0.324074	-0.758894	1.06029	0.887433	0.171225	-1.16849	-0.247496	-0.055197	-0.51584	-1.45074	0.564801	1.11311	-0.594423	-0.341708	-0.00449289	0.271522	-1.16616	0.585788	0.359615	-0.742572	0.783713	-1.00661	2.07392	0.320177	-2.09364	-2.34803	1.65335	-1.01712	33	-0.413898	-0.246264	-1.86234	0.852855	-0.171515	0.803222
34	-1.57594	1.53757	0.298214	-1.2795	-0.0348504	-0.155648	-0.418354	-0.0881097	-1.12	1.41365	0.555133	1.13218	-2.37368	-0.864679	0.409644	-0.333443	-0.481992	0.0632702	-0.652214	-1.3484	-0.890335	-0.408637	0.967047	-1.27823	-2.28642	-0.0348277	0.405931	-0.843606	0.0773307	-0.105805	0.257157	-0.469514	-1.10829	-0.302252	-0.369969	-1.719	1.6514	0.164384	1.35978	0.327878	-0.678739	1.0776	34	-1.7002	-0.47867	-3.36993	-1.03876	-0.193192	-0.864872
35	1.77516	2.34314	0.69382	-1.85465	-0.000655358	-0.525964	-2.46279	1.81594	1.12907	1.2136	0.186261	0.432644	-1.73033	0.119489	-0.661231	-0.316667	1.05086	0.0332874	-1.6736	0.545145	-0.294952	-0.993312	-0.152673	0.947106	-0.723332	0.786127	0.411276	-0.712518	0.48424	0.415019	-1.73897	0.271477	-0.165281	0.160865	1.21462	-0.869483	1.79967	2.6736	-1.08766	-2.96631	-0.316585	1.45352	35	-1.30343	-4.7891	-2.98133	-0.153062	1.20907	-0.339673
36	0.377539	0.885904	0.940744	-1.347	-0.420993	1.08565	0.337314	0.460902	-0.553012	0.55397	-0.522771	1.63405	0.0336179	1.03086	-0.919679	-0.898667	-0.541715	0.303694	-0.173524	0.753193	-1.24098	-0.742592	0.930509	-0.351331	-1.12596	1.30334	0.204674	-0.641332	-0.950698	0.147951	1.48817	-0.633003	-1.22125	0.0169623	0.213735	0.0364503	2.7491	0.82645	-2.56965	-0.566357	0.101883	1.39309	36	-0.0673083	-3.07439	-2.61774	0.360237	-0.778457	-1.2741
37	0.192503	2.35321	0.120982	-1.45969	-1.21992	0.70973	1.42919	0.276839	-1.13812	0.948478	-0.235727	2.23868	-1.42533	-0.711072	-1.38058	0.0525695	-0.67654	-0.430886	0.0393827	0.147148	-0.569444	-2.0141	-0.0154762	-0.303421	-1.0524	-0.932763	0.553891	-2.75796	0.301768	0.813847	-1.83639	-2.92519	-1.57917	-0.768409	-0.894899	-0.796779	3.00406	0.669702	-1.86005	0.523454	1.18361	1.73146	37	-0.871442	-4.54137	-3.67966	-0.43795	-0.883786	-0.528274
38	0.805062	1.67066	-0.46182	-2.01694	0.527425	1.55925	0.096118	0.142633	0.58793	1.6058	-0.68389	0.525024	-1.57486	0.537971	-2.51903	0.125033	0.673755	-0.590248	0.411702	0.350693	-0.0482965	-0.902967	0.807568	-0.116054	-0.0500037	2.24149	0.341509	-0.860838	-2.25125	1.01847	1.77739	0.484161	-0.153412	-0.836548	0.267478	-0.821973	0.913031	0.782549	0.599694	-1.82544	0.122475	0.211819	38	-1.34625	-3.41535	-2.54294	0.549741	0.0834348	-3.47929
39	-0.0978583	0.28422	0.214434	-1.77858	0.29182	1.25885	1.54259	0.297005	-0.745056	0.816127	2.26594	1.67483	-0.357581	0.0145567	-1.28197	-0.366359	1.45689	0.385286	-0.583791	0.428126	0.384339	0.846927	0.761925	-0.103677	-0.463975	-0.602901	0.288303	-0.781715	-2.78168	-0.185519	-0.453169	-2.19469	1.61025	-0.610561	0.842151	0.415917	1.00179	3.48435	0.554831	-1.24225	0.292523	1.4984	39	-1.01522	-1.33249	-2.50996	0.439095	-0.372716	-1.37141
40	0.172833	1.53626	0.703886	-1.86362	0.95346	0.182324	-0.502939	0.172884	-1.24598	0.290579	-0.80913	0.0186835	-0.577283	2.19486	-0.744327	-1.22369	-0.223726	1.19916	-0.243141	0.224241	0.549252	-1.54325	-0.105397	-2.4058	0.879991	2.27774	-1.13994	-1.18234	0.92197	0.128069	-0.363535	0.344588	-0.981397	0.42956	-1.38892	-0.401591	0.624859	2.22684	1.37347	0.371247	2.03547	1.65693	40	-1.43696	-2.22727	-2.54203	-0.509543	-2.67796	-1.25716
41	0.423078	0.266682	-0.476665	-1.57888	-0.599358	0.0587664	0.31358	0.766489	-0.215228	0.146615	-0.596623	1.66359	-0.126811	0.631311	-1.55321	-1.51605	0.352338	0.839831	-0.366994	-0.467785	0.143315	-0.19186	-0.954891	-0.224536	0.411201	1.5986	0.491062	-1.63032	0.511029	-1.22051	-0.00346088	0.890639	-2.27188	-0.0674787	2.15697	-0.0497163	-0.536505	-0.704961	0.168293	1.79562	-0.792805	-0.582679	41	-2.24206	-1.53226	-3.01351	0.550554	1.20014	-2.69088
42	0.174417	0.183565	0.425106	-0.490284	-0.237702	0.0678037	-0.709197	1.67224	-2.31461	-0.503179	0.707917	-0.187355	0.644761	0.488759	-0.567983	-0.232815	0.127307	-0.0946724	-0.523655	0.0256995	1.21956	-0.316522	-0.0349912	-1.7632	0.886074	0.916186	1.01188	-1.40766	-0.359172	0.623753	0.491534	-0.353153	0.152089	0.543261	-1.16087	1.17195	1.94273	2.31914	1.11131	2.69717	0.458563	1.56399	42	-1.81827	-1.05936	-3.59383	-0.425696	1.25133	-2.18139
43	-0.299485	0.466269	-1.07451	-1.47613	-0.54487	-0.67645	0.231747	0.521923	-0.0351371	-0.0987897	0.806908	1.82859	-0.585871	1.61595	-1.47923	-0.355972	-0.377297	-0.045323	0.0732316	0.79813	2.62315	-1.30961	0.24092	-1.99268	-0.394071	1.28224	-0.21228	-1.22083	-1.92834	0.440679	0.0424213	0.270434	-0.832808	-0.36163	0.852088	0.134737	1.67816	1.67911	0.181009	-0.0283554	0.0281625	0.00886935	43	-1.81392	-1.47526	-3.23069	0.419704	-0.329562	-0.85673
44	0.475141	0.603286	0.830743	-1.2518	-0.428487	0.117219	-1.40261	0.714473	0.138834	0.463188	0.249314	0.587383	-0.675491	-0.0910687	-1.0758	-0.110259	-1.40038	-0.18723	0.80955	-0.883064	-1.74	-1.15883	0.453234	-0.385572	0.553642	0.840223	-0.753435	-1.96078	-1.0709	-0.104112	-1.02839	-0.321609	0.854561	-0.0316186	0.562084	-1.13768	1.82505	0.0512077	1.41961	0.0465979	1.71515	1.10142	44	-2.81775	-1.6062	-2.89216	0.0920862	0.929517	-1.02479
45	0.727844	-0.0278508	0.431453	-1.76163	0.511667	-1.64921	-0.917976	-0.385541	0.0779021	0.51492	-0.906522	0.284318	-1.37756	0.295681	-0.0904819	0.18806	-0.11855	0.138023	-0.0895828	-1.1703	1.46497	0.0766723	-1.4363	-1.83866	0.594877	1.41835	0.445869	-2.19358	-3.90564	0.626578	0.534238	-0.373559	-0.00384483	0.931259	0.477472	-0.162606	2.94839	-0.0680917	-0.324105	-0.387086	0.431586	-0.878142	45	-1.13119	-0.321019	-3.59698	1.30516	-1.20783	-0.878247
46	1.15042	0.717784	0.371052	-0.480627	0.543098	-0.400617	0.100151	0.596515	-1.50996	0.426518	-0.12314	0.0706488	0.445404	1.04797	-2.36707	-0.740404	1.30088	0.594894	-2.04261	-0.00507778	-1.11937	-0.197826	1.19015	-2.73702	0.515795	-0.0162592	-0.920305	-1.8428	-0.146247	1.39297	-0.698926	2.24579	-0.676467	0.135063	-0.619175	0.766706	-1.58924	1.82744	-1.80645	-1.1915	-1.048	-0.97819	46	-0.829957	0.254945	-3.45888	0.0545238	0.734678	-1.09983
47	-0.473461	0.545688	-0.66023	-2.26526	-0.441835	0.440353	-2.00031	0.234275	-0.0362851	1.11482	-0.393899	0.0619649	-0.10626	0.786341	-2.67285	1.21864	0.582361	0.806863	-0.726901	-0.0350625	-1.08203	0.103834	-0.373348	-0.568741	-0.108058	0.627901	-0.456582	-2.23976	0.317437	0.775643	0.170679	-0.502097	0.519505	-0.114294	-0.725977	-0.0549901	2.62476	0.821716	-1.05239	0.198101	1.51192	-1.01573	47	-1.03129	-1.07071	-4.49267	1.44068	-0.00591891	-2.06249
48	-0.622965	-0.5344	-0.797145	-2.31874	-0.413079	-0.231389	0.174838	0.818163	-0.414607	0.606396	0.30983	1.20611	-1.8933	0.630498	-2.39563	0.08755	0.325764	-0.0232359	-1.16262	-0.87532	-2.42455	-0.62181	0.105319	-1.35682	-0.368878	0.447698	-0.110923	-1.11642	0.775129	0.305011	0.360945	-1.97356	-0.0976115	0.21516	0.255506	-0.712246	2.08688	1.42817	0.815805	-0.661577	-2.51154	2.81972	48	-0.870409	0.208099	-3.04986	1.82267	-0.0076834	0.826751
49	-1.07359	1.42424	0.0374185	-1.71074	-1.43993	-1.40878	-1.49864	0.213131	-0.841817	-0.606108	-0.376824	0.284454	-0.979301	1.28138	-1.29024	-0.589885	-0.229063	-0.137456	-0.506954	0.483537	1.26965	-0.351256	-0.92201	-0.837436	0.185302	0.119135	-1.12497	-1.2574	-1.65405	-0.109614	-0.793961	-0.434401	-0.00202256	-0.906131	0.55978	-0.154865	-0.949042	0.680972	0.100932	0.447072	0.0391357	-0.0013809	49	-0.883198	-4.02194	-4.71949	0.520806	0.83217	-1.10746
50	0.000425525	0.433478	-1.60842	-1.67869	0.565528	1.64803	0.841071	1.16041	0.806665	1.06045	-0.795476	0.505087	-0.442567	1.19561	-0.528058	0.667945	0.107432	-0.620419	-0.220301	0.140958	0.727016	-0.841963	0.554336	-1.40593	0.520813	0.65087	1.36336	-1.11894	0.301824	-0.491188	-0.891451	-0.123787	-1.59275	-0.529225	0.41222	-0.708644	1.26046	2.25305	1.65193	0.907604	1.04497	1.1682	50	-1.3496	-4.15534	-3.51308	0.67835	-0.188595	-1.77558
51	-0.635204	1.07061	-0.833055	-2.04494	-1.27208	-1.10364	0.500636	0.666284	-3.45114	1.96833	0.741016	0.865733	-0.997061	1.34056	-0.31267	-0.916213	0.0800266	0.236529	0.83388	1.24477	-1.85379	-0.783198	0.296417	-0.217411	-0.827855	0.622915	-0.344722	-0.848229	-0.92303	-0.0195083	0.282017	-1.23689	-1.68321	-0.627921	1.41938	-1.56814	1.4362	1.06371	1.43605	1.54074	2.17345	0.96629	51	-1.93648	-3.05898	-3.1466	-0.299361	-1.66577	-3.32498
52	-1.25031	-0.607224	0.0308195	-0.898219	0.793253	-0.858668	0.93812	1.70616	-2.28983	-0.523474	0.63249	0.529073	1.03839	2.6129	-0.857869	0.76617	0.154531	0.0436602	-1.20827	-1.14951	0.150163	-0.546242	0.114796	-1.0269	-0.129188	0.979994	-0.850526	-0.825237	-0.774086	0.0365474	-0.778252	-0.446194	-1.23329	-0.935687	-0.250252	-0.104879	2.40135	2.80787	-3.10499	1.04841	1.38791	-0.676556	52	-1.45241	-0.226272	-4.52881	-0.605874	-1.23939	-1.77029
53	0.314176	2.20168	-1.14419	-1.03288	1.93972	2.46507	-0.0306186	1.34918	-1.63155	1.30452	-0.572575	0.550238	0.269888	0.99484	-0.59946	-1.62156	-0.0241051	0.983372	-0.907336	-1.06325	-0.317325	-0.711236	0.228472	-0.44491	0.503668	2.69432	0.386999	-2.39812	-0.00757771	-0.781809	-1.29544	-2.54791	-0.853457	0.557217	-0.479432	-0.238501	-0.146753	0.735132	0.298951	1.01892	-1.31959	-0.554806	53	0.137205	-1.57347	-4.57083	0.156496	-0.183097	-2.49406
54	-0.292862	1.50113	0.0321441	-1.84011	-0.836453	1.67253	0.526661	-0.390998	-1.071	0.870296	-0.597647	1.37726	0.583817	2.31239	-0.796792	-0.618812	0.802477	0.957736	1.92681	0.639954	1.29329	0.535488	-0.989627	0.461188	0.812203	0.501072	-0.824206	-1.69897	0.42058	0.199877	0.860146	-1.60085	-0.141409	0.417202	-0.237857	0.779454	1.31621	0.0104614	0.304871	-2.58425	-0.453489	-0.498407	54	-0.92043	-1.29673	-3.50667	0.634894	-0.354969	-1.93113
55	-0.118146	0.960823	0.634042	-3.12459	0.80315	-0.0786168	1.23901	0.316187	-2.51233	0.532691	-0.908964	0.567881	-0.554958	1.25633	-0.768137	0.619141	-0.804111	0.517805	0.414186	-0.873869	0.16876	-1.1492	1.29982	0.0198468	-0.712146	0.564239	-2.26401	-1.50184	-0.148609	-0.146581	0.670566	2.38197	0.831768	-0.105059	1.46252	1.38357	1.16448	0.239743	1.58926	0.623975	1.19438	0.841843	55	-1.51065	0.236416	-4.65096	0.501279	-1.058	-3.85994
56	-0.294979	1.11171	0.369759	-1.11829	0.828978	2.24038	-0.431712	0.113055	0.784092	0.754981	0.894916	1.38647	-1.4768	0.824468	-0.557204	-0.0813289	-0.421643	0.330763	1.36906	-0.445409	1.8791	-0.631729	0.674431	-0.239935	1.39544	0.67756	-0.407004	-2.1289	-1.81757	1.53688	-0.998621	-0.522191	-0.382146	0.612077	0.63379	0.859407	0.633206	1.79397	0.748234	1.41577	-2.06283	-0.869237	56	-1.86635	-0.0225195	-4.51241	1.63152	-1.55451	-1.72224
57	-0.0393566	1.33487	-1.82976	-0.989431	0.710885	0.743296	0.124739	-0.393672	-2.03569	0.547316	-1.04197	2.81878	-1.75422	-0.585775	-0.569184	0.276382	0.448933	-0.473735	-2.52188	1.04673	1.44166	-1.11333	1.31641	-0.362324	0.626441	1.81253	-0.444304	-1.49992	-0.0551704	-0.275406	1.0923	-1.67784	-1.1225	-0.0045228	-0.244776	1.6947	1.50963	-1.01022	-0.142493	0.849721	-1.64767	-0.874487	57	-0.46063	0.227789	-1.26296	1.16276	0.385596	-1.91721
58	0.770595	1.56711	-0.320537	-0.394726	-0.480826	0.24852	0.81128	1.07159	0.575853	0.560321	-0.119971	0.967746	-0.318632	1.03472	-0.632638	-0.542336	0.908405	0.296558	-2.0914	-1.40604	-1.25615	0.459196	0.81598	-0.428337	-1.01911	-0.128759	0.656341	-0.543042	-1.91577	-0.150003	-0.489956	0.167849	1.14482	-1.12699	-0.325362	0.110202	1.28443	2.86448	1.11415	0.57969	-0.406722	0.36941	58	-0.276123	-3.89436	-4.13464	1.65048	-0.915724	-2.72966
59	0.457131	1.33418	0.215399	-1.09287	-0.709694	0.904845	-1.09109	1.90543	-1.27631	1.18088	-1.49905	0.777194	-1.64608	0.643512	-1.29405	-0.738018	0.30295	-0.303876	-1.02558	-1.54881	-1.80812	-1.29797	0.965984	-0.670867	-0.314849	0.77049	1.21686	-1.63685	-0.613633	1.34322	0.807418	-0.39684	-0.75384	-1.10396	0.381674	1.30017	1.61816	0.519048	-0.41643	-0.102058	-0.249451	-1.86955	59	-0.376489	-2.62975	-2.19316	-0.0865632	-3.16258	-1.62339
60	0.064127	1.23976	0.086892	-2.77855	-1.08221	0.894656	-1.4452	0.699965	-0.38956	-0.369218	1.16566	1.69508	-1.96068	0.646368	-0.153104	-0.319631	0.59913	-0.354009	0.166918	-0.89544	-1.33976	-0.529882	0.529197	-0.537056	-0.0295035	2.18614	0.624268	-2.29502	-1.78475	0.438137	1.24577	2.63196	-1.55855	1.11288	0.0198564	0.170358	1.15112	1.09193	-0.565116	-0.0505801	-1.21931	2.04243	60	0.313554	-2.79253	-2.07627	1.68447	0.266309	-3.93925
61	1.58149	0.601984	1.50267	-1.70374	-1.01485	-1.2197	1.04958	3.28403	0.281885	1.16034	0.331583	0.556029	-1.17797	-0.205634	-2.23641	-0.365055	-0.898013	-0.27308	-1.91841	0.273041	-0.943041	0.950939	1.22691	0.0104425	-0.163592	0.447251	-0.347111	-1.01082	0.270215	0.740116	-1.33529	-0.203329	-0.489515	0.665022	1.19007	0.250455	2.43291	0.982123	0.283281	-0.0628967	-1.72802	0.586182	61	0.251715	-1.26355	-2.00531	0.553286	-0.751077	-3.13407
62	-0.568997	1.88783	0.579256	-2.40924	-0.467337	-0.141239	-0.431067	1.22655	-0.50162	0.558911	1.36675	-1.29043	-0.888205	0.120935	0.25716	-1.47448	-0.347801	1.28958	-0.613455	-0.804606	0.927453	-0.567908	0.27627	-0.670355	0.0752242	0.7709	0.348888	0.0521918	-0.176965	0.588442	-0.780277	-0.725413	-1.05132	0.0144267	-0.184649	0.040463	0.126917	0.163102	1.18531	0.361733	1.06117	-1.42057	62	0.385748	-2.27186	-1.47507	2.38832	0.589067	-4.13915
63	0.254139	-0.0104646	-0.626199	-3.37896	0.140216	0.755875	1.35394	0.782699	-1.18361	1.95643	-0.0629865	1.26613	-1.52261	-0.456057	-0.901818	0.260093	-0.505608	0.631383	-1.47316	-0.274883	-1.19134	-0.970484	0.434453	-1.55943	0.741593	0.366614	1.39914	-0.531203	-0.361138	0.813967	0.803751	-0.495663	-0.669057	-0.0350068	-0.536105	-0.207475	-2.56187	2.64619	-0.0458997	-0.992508	-0.786345	1.58409	63	-0.139506	-1.16771	-2.16976	0.305903	-1.08443	-1.36885
64	-1.36689	2.03182	-1.13032	-2.14252	0.961858	0.556996	-2.06023	-0.125707	-1.88312	0.843452	-0.279138	-0.556257	0.335401	-0.768709	-0.734182	-0.469664	0.502473	0.923334	-0.49516	-0.0756245	-0.0545646	-0.914981	0.967884	-0.986785	0.446922	0.416926	0.369723	-1.59613	-0.514713	0.34906	0.0997823	0.182393	1.7641	0.037622	-0.453871	-0.578565	1.75202	0.0602543	0.135625	1.85553	0.244836	-0.0305143	64	0.0922818	-1.14375	-0.637177	1.54846	-0.986172	-2.02231
65	1.74223	0.961117	-0.327686	-2.88734	0.521846	-0.53431	1.27707	-1.13764	-0.636465	1.70479	1.06061	-0.0675706	-0.0582226	-0.0621098	-0.980165	0.158111	0.674056	-0.402267	-1.99994	-1.40568	1.21269	-1.45315	1.75311	-0.838029	-0.964071	1.14394	-1.32817	-0.716776	-1.46183	0.12678	-1.15287	-2.187	-1.0226	0.0669841	-2.70119	-0.667388	0.97373	0.627175	-1.20193	0.644365	-0.648546	0.431981	65	-2.76244	-0.685065	-1.11431	0.935478	-1.18631	-3.42886
66	0.0370952	0.164582	1.32115	-1.60607	-0.866737	1.7022	-0.169883	2.69657	-1.99902	0.216606	0.495582	-0.277826	-0.594495	-0.375696	-0.812124	-0.0437299	-0.968182	0.424132	-0.458688	-0.00900692	0.190732	-0.395021	-0.521971	-1.05938	-0.078043	0.683136	0.851237	-0.643356	-1.14158	0.124231	1.11895	0.371357	-0.936765	-0.190475	-0.676058	-0.467219	3.60332	0.818394	-0.69134	2.05791	0.014026	0.894308	66	-2.45926	-1.52387	-1.19721	1.30813	0.499463	-1.46223
67	0.950263	1.33186	-0.602345	-0.497021	-1.02495	0.410366	0.285343	0.449481	0.343061	-1.55961	-0.331822	0.947616	0.0644172	1.72832	0.355168	-0.06688	1.04861	-0.200576	-0.428379	-0.148434	1.32474	-0.467974	-0.704453	-0.815403	-0.244994	0.733116	-0.59773	-0.884638	-1.76328	0.836529	0.762689	-0.61918	-0.590903	-0.770019	-1.88841	-1.34545	0.602451	1.06868	-1.50402	-0.342207	1.53502	0.879552	67	-1.65612	-0.494788	-1.3633	0.824032	0.849966	-2.00831
68	-1.32672	0.0719218	-0.182659	0.0932488	0.265079	0.0806772	0.869799	1.58991	-0.48363	-0.393762	0.0289439	0.612756	-0.686802	-0.495087	-1.03893	-0.273571	0.470713	-0.872567	-0.473536	-0.276165	-0.122709	-0.444517	0.202225	-0.982265	-0.201564	-0.0387302	-1.00053	-0.027596	0.584501	0.172634	-1.47303	0.988259	-1.795	-2.16472	-0.329087	-0.963731	-0.731793	-0.00604915	-2.33591	-0.57254	-2.16102	-0.813402	68	-0.822877	-1.87234	-2.21985	0.582356	-0.653057	-2.62146
69	0.197009	0.954326	-0.49242	-0.700571	-0.644566	-0.418158	0.407616	-0.0811275	-1.13903	0.231131	0.692624	-0.365613	-1.34511	0.213294	-0.433528	-0.316732	-1.38271	0.106426	-1.04486	-1.25213	0.810868	-0.733425	-0.202147	-1.63889	0.420951	0.676412	-0.389171	-0.126227	-1.82324	0.0382882	0.209748	-0.0370821	-0.00539088	-0.285288	-0.431928	1.06784	0.415098	0.989014	-1.80567	-1.26046	-0.233888	0.898383	69	-0.235655	-0.270933	-2.13483	2.47242	2.16495	-0.908898
70	-1.28069	0.539556	1.00601	-0.431174	1.02554	0.2265	-0.35676	0.934928	-1.44607	0.871293	1.24134	0.251944	-1.59467	0.192015	-1.17931	-0.330241	-0.03951	0.145911	-0.88159	-0.942183	1.42006	0.488731	1.11407	-0.673209	0.399032	-0.968446	0.649502	-1.03087	-0.118414	1.86571	0.570363	0.0413843	1.5571	0.0339373	-0.812823	0.171066	3.66961	1.45598	-1.98125	0.168117	0.644825	3.74339	70	-0.245328	-0.396222	-1.67028	1.78372	0.204372	0.501034
71	-0.567226	0.684942	1.23605	-2.82898	0.542071	-0.773049	-0.363241	0.721663	-1.73035	0.842679	1.38748	1.33097	0.730058	0.927374	-0.732011	0.711977	0.353188	-0.309925	-2.47896	-0.105328	-1.28906	-0.633712	0.428545	-2.20181	0.00275866	-1.27925	-1.06461	-0.533459	0.000386558	0.350233	-0.0715441	-0.433643	-0.1052	-0.970454	-0.450641	0.391532	1.76493	-0.0448155	0.289481	1.30596	-0.717102	-0.589826	71	-0.371035	0.210559	-2.2939	0.318725	0.52667	-2.32226
72	0.841985	0.675323	0.490659	-1.01814	-0.173754	-0.352081	1.97301	0.321059	0.0840651	0.776457	-0.170204	0.27841	-0.836823	0.673458	-0.391151	-1.13764	-1.00079	1.12673	-0.564745	-2.25603	1.10652	-0.391813	0.815518	-1.58299	0.636416	0.431531	-0.657908	-0.435465	0.234597	0.200638	-0.44368	-0.327489	0.535891	-1.31703	0.20666	-0.429426	1.12565	0.718674	-0.480241	0.588536	-1.33532	-2.29598	72	-0.891539	0.317566	-1.9713	0.737429	-0.607125	0.62493
73	0.579188	1.12801	0.503916	-0.496641	0.0693442	1.80071	-1.92517	0.871661	-0.232868	0.984455	1.072	0.852394	-1.96503	0.213578	0.291642	0.635835	0.267364	0.216893	-1.95581	1.56051	0.974238	-0.477964	-0.477196	-0.891645	0.163171	1.57138	-0.0924382	-0.701688	-1.64805	-1.37949	1.16018	0.2449	-0.593011	-0.532452	-0.131067	1.15381	-0.93258	-1.02293	-1.25048	2.20745	-0.306399	3.57204	73	-1.11614	0.15398	-1.70333	3.24792	2.00932	-2.45327
74	0.171775	0.0547367	-0.494809	-1.28898	0.687254	1.14204	1.81987	1.37237	-0.930814	2.17888	0.28165	0.225642	-0.0174241	1.04491	-0.916887	0.0787088	-0.823937	0.480223	-0.0480734	0.384072	-1.59507	-0.237061	-0.373941	-0.135625	0.965012	0.291632	-0.617156	-0.663182	0.0987305	0.638	0.908515	-0.517076	-2.56505	0.6672	-0.803879	-0.998148	0.681441	1.07117	0.188231	-0.567592	1.62876	-0.149452	74	-1.25406	0.965835	-1.38949	1.0038	0.59404	-2.22897
75	-0.742107	0.896877	-1.02773	-2.49659	0.381306	0.610307	0.874863	1.06225	-1.8477	-0.633801	0.429734	0.967221	-0.801328	0.424007	-0.135495	-0.831984	0.634239	1.12153	-0.51888	-0.85461	-0.31119	-1.24532	0.720264	-0.211191	-1.73962	2.02729	-1.27014	-1.06135	-0.360923	1.41524	1.57783	1.69934	-0.561832	-0.843923	-0.758022	0.726431	1.21477	1.52836	0.66443	-1.55491	-1.59711	1.80078	75	-1.1822	0.135282	-0.948378	1.02703	0.684144	-0.308711
76	-1.20324	0.538335	-0.345666	-0.28991	1.71364	0.451852	1.10095	2.45574	-0.141216	0.965949	0.340341	1.50195	-0.351279	0.262769	-1.00485	-0.621934	0.110785	0.590102	-1.98322	-0.966423	-0.336674	-0.998138	-0.498995	-0.608461	0.30937	1.18322	-0.331526	-0.552414	-0.663365	0.496156	0.588364	0.0620652	0.48025	-0.00363416	0.622516	0.0755839	1.56776	1.12222	0.0846888	-1.56184	0.863461	0.134613	76	-1.19612	-3.01677	-0.775107	1.50838	0.974423	-0.813836
77	0.335541	0.301614	-0.784151	-1.08702	0.212553	0.73614	-2.37585	-0.367875	-2.17198	-0.062721	0.795313	1.4014	-0.207505	1.65818	-1.45081	-0.0651579	0.500621	0.51408	-1.99261	-0.25383	-2.08754	-1.53153	0.382962	-1.612	-0.16979	0.996289	-0.190127	-1.44785	-1.42348	-0.602601	-0.312299	-1.6394	0.17965	-0.96033	0.789356	-0.423043	0.0243889	1.93284	-1.84146	-0.709175	-0.0145067	1.15368	77	-1.15747	-2.63312	-1.75062	1.56693	1.47015	-0.0616892
78	-1.02482	0.637676	0.616225	-2.17513	1.04415	-0.290771	0.137294	1.87045	-0.587357	0.704333	0.874537	-1.07009	-0.0966938	-0.193038	-1.8417	0.0516136	0.103217	0.656291	-0.829715	0.997563	0.723913	-1.15652	-0.231046	-0.364753	0.330542	1.91546	1.05625	0.117649	-0.503853	0.307872	0.22513	-0.558768	0.157619	0.446556	-1.02541	0.720601	-1.48352	1.36383	-1.04161	-0.122671	2.45271	0.339657	78	0.383189	-3.6201	-0.77586	2.20655	-0.601179	0.870009
79	0.641379	1.68904	1.00506	-0.377234	0.647828	-0.343044	0.330254	1.77894	-0.203389	0.878079	-0.197991	-1.15757	-2.39009	0.70493	-0.816217	-0.322921	-0.320822	-0.322201	-0.900228	0.720414	-1.0218	-0.849421	0.838859	-2.24214	1.24106	-0.30725	-0.0294032	-0.755668	-0.945538	1.53235	-0.132723	0.51671	0.107759	-0.0812646	-0.456481	-0.786427	1.83167	1.74097	1.1499	0.0423394	0.610892	0.579637	79	-0.930974	-1.86552	-1.03808	0.517192	1.33204	-2.03527
80	1.11464	1.54031	1.37461	-0.816152	1.2132	0.2512	-1.40193	0.940178	-0.345756	-0.145989	-0.136987	0.0549919	-1.72715	0.803542	-0.59848	-1.03703	-0.998874	1.11605	0.310115	0.139471	1.28125	0.177631	1.23337	-0.480945	0.160143	0.306744	-1.59561	-1.34855	-0.379911	-0.529452	0.13098	-3.7415	-0.166626	-0.730445	-2.20363	-0.477603	-0.643057	0.851328	-0.865109	-0.954119	-1.48903	1.26183	80	-0.70326	-2.19695	-2.78175	0.332053	0.662442	-1.05144
81	-0.106988	-0.962737	0.151455	-0.930741	-1.42807	0.443369	1.4798	1.32144	-2.58668	0.704384	0.0494294	-0.684524	-0.447177	1.69941	-0.333495	-0.264712	0.319001	-0.931979	-1.74197	0.975699	0.927795	-1.40106	-0.496748	-0.398277	-0.0061769	0.139283	-0.933072	-0.993215	0.108189	0.627409	1.30683	0.201272	-1.37599	-0.421117	0.933425	0.0374819	1.72634	0.13617	-2.80582	-1.92595	0.0567933	0.0187971	81	-1.76721	-3.91106	-3.22215	1.64753	2.19001	-0.353524
82	0.184789	0.476886	1.74818	1.80573	0.357506	-0.251446	-0.497359	0.110394	-1.72254	-0.0183482	1.59075	0.238635	-1.67831	-0.0866355	-1.06142	-0.153486	-0.227969	1.04768	-1.08853	1.90086	-0.0303906	0.931027	0.526784	-0.65968	-0.0797393	1.57776	-0.0635832	-0.851844	-1.27627	0.162683	1.57781	0.609735	-1.6448	-0.502265	0.187154	0.561781	0.744167	1.01254	0.302833	-0.522187	0.615856	0.597593	82	-1.57748	-1.18536	-2.373	1.36688	-0.690634	-0.469327
83	-0.421835	1.39457	0.697214	-1.67187	0.233267	-1.12101	1.55075	0.394733	1.47152	1.65947	1.60934	-0.524283	1.06125	1.2228	-1.42774	-0.304252	0.652793	-0.896601	-0.894847	0.702288	0.148611	-0.241726	-0.621655	-0.232149	-0.705561	0.175119	0.609157	-0.304782	-0.119712	-0.166532	0.336612	1.32753	0.57174	-0.55645	-1.29253	0.792329	0.890366	-4.70591	0.486658	-1.17767	0.630361	1.47465	83	-1.80814	-0.120893	-1.67281	0.268893	0.806249	-2.42145
84	-0.233925	0.590587	0.481346	-0.117578	-0.576555	0.475299	-0.129959	1.13175	1.02703	1.23969	0.572683	0.502534	-1.20012	1.36453	-1.57324	-1.84997	0.603362	1.58569	-1.90736	0.60818	1.47319	-0.0163898	0.667468	-0.215614	0.503696	-1.39345	0.14647	-1.14009	0.019151	0.644692	-2.64588	0.846755	-0.448784	-0.690698	-1.25285	-1.38082	-1.87027	1.87852	-0.424871	-2.82667	0.764957	-1.17329	84	-1.97291	-0.481918	-1.92235	0.150937	-1.24207	-1.99903
85	0.810807	1.93864	0.559747	-0.588302	0.139013	0.490815	-0.264352	2.44126	0.879325	0.948833	0.550775	0.601525	-0.213771	2.3734	-0.833632	-0.455596	1.43751	0.0596811	-0.286769	-2.16199	1.22684	-1.01317	0.71179	-1.41702	-1.11679	1.27202	-0.471186	-0.297124	0.874179	0.0349373	0.237497	-0.47596	-0.566331	-0.770105	-2.14029	-0.818793	0.274929	-1.02034	1.24657	-1.96001	-0.757075	-0.573439	85	-0.0378162	-1.39275	-2.57803	-0.425883	0.538323	-1.15219
86	0.453741	0.819224	1.30646	-1.49588	0.152165	0.0113293	-0.364727	1.61022	-2.42031	0.602372	1.28613	1.18707	0.802451	0.775015	-0.118466	0.0877243	-0.32171	0.100216	0.0289747	-0.501056	2.01	0.552556	0.106999	0.380011	-0.096922	0.532751	-0.281892	-0.0627943	-0.742004	0.28343	0.298963	-0.920324	-2.24653	-0.0794658	-1.65317	-0.947946	-1.84886	0.622862	-2.5292	-1.51582	-2.27149	0.409325	86	-0.478927	0.648387	-1.375	-1.20343	1.43417	-1.78385
87	0.511613	0.679951	0.744914	-2.35808	0.49375	-0.751802	0.789393	1.26118	-0.900801	-0.128246	0.226708	1.4052	0.345761	1.98909	0.609607	-0.391923	0.527109	-0.467137	0.246889	-0.181764	-1.27102	-1.15219	0.0538045	-0.332529	1.16654	-0.553978	-0.502748	-0.187158	0.00285908	0.721242	-1.34119	0.45349	-0.901135	0.0423447	-1.72728	-0.790519	1.1913	-1.6338	0.055226	-2.14732	-0.145559	-0.297058	87	-1.03449	-0.723876	-0.00886358	1.7388	-0.00563069	-0.491055
88	-0.146233	0.625028	-0.530581	-2.22949	0.179244	1.35481	-1.75022	1.41722	-0.960912	1.14174	-0.0707248	0.440894	-0.960815	0.615032	0.653075	-0.279005	0.936321	0.269163	-2.30536	-0.113524	-0.294724	-1.01785	-0.583548	-1.69234	-0.152344	-1.57002	-0.964669	-0.117649	-0.666538	-0.212392	-0.311725	-0.0049021	-0.509256	-0.558806	-1.58939	-0.821263	3.73794	0.512963	0.16096	0.956274	-1.29015	0.313933	88	-0.871117	0.51924	-1.23894	-0.592912	2.89899	-1.10536
89	-0.0847636	1.00832	0.773464	-0.992114	0.205255	1.13011	0.597706	1.63599	-1.23904	-0.947369	1.42454	1.22418	0.00932413	0.194424	0.621232	0.394477	-0.528006	0.108418	-1.37355	1.15696	-1.20846	-1.66614	0.441618	-1.20763	1.34573	0.68783	0.902483	-0.5054	-0.463807	0.629051	0.982996	0.95003	-1.23729	-0.42915	-1.41268	-1.41937	1.31188	-0.441712	1.92065	1.12873	-2.46475	2.16566	89	-2.95815	-2.2514	-1.59357	0.400299	1.25502	-2.45107
90	0.877574	0.880143	1.15612	-2.0874	-0.163165	1.6259	0.138152	0.0303835	-2.16486	0.0284289	0.306703	0.645547	-0.761944	0.668858	-0.411998	0.805869	-0.445286	-0.481652	-1.1356	-0.553167	-0.39525	0.250775	0.676129	-1.27428	0.995585	0.265137	0.175413	-0.942722	-1.60162	-0.937916	-0.617285	-0.456098	-0.333511	0.232399	-1.06046	-0.948615	2.89263	1.72256	-2.62208	1.58165	1.18717	1.20763	90	-1.16874	0.468877	0.325923	1.41913	0.546408	0.570493
91	0.900893	-0.199922	0.001146	-1.85918	0.842615	-1.37927	0.3424	-0.541579	-0.133186	0.102945	1.17458	0.430913	0.580661	0.628657	-1.55553	0.269504	-0.941325	-0.412313	-1.37706	2.60383	-0.637665	-0.614295	0.370249	-1.60069	-1.06388	0.322193	0.100855	-0.193691	-1.31366	0.304046	-0.883824	0.917493	1.30752	0.746692	-1.78207	-0.995983	0.636446	-1.67244	1.66701	1.13785	0.0363204	-1.16948	91	-0.395989	0.537387	-1.60931	1.13299	0.973377	-0.759852
92	-1.28693	0.742655	0.548574	-2.01754	0.185386	2.08433	1.7297	3.60449	-1.07328	-1.73732	0.392297	-0.00657462	0.808675	1.16808	-1.01868	0.720672	-1.00576	1.09572	-0.289243	0.984391	-2.20185	-0.525064	0.392347	-1.51296	0.04789	0.789047	-1.30118	-1.7529	-1.41531	0.438559	-0.328519	-0.493182	-0.676785	-0.59228	-1.5273	-1.72933	1.85718	-0.605917	0.106489	-0.584352	0.305007	-0.765359	92	-1.00538	1.5764	-1.69086	2.26078	1.6048	-0.438764
93	-0.352219	-0.465282	-0.653913	0.281145	1.24015	0.887486	1.78126	-0.604505	-0.00634859	0.147978	0.449226	0.111692	0.294927	-0.194234	0.0102682	-0.381049	-0.388516	-0.804173	-0.432132	0.967025	0.583264	-0.456712	0.25678	-0.175687	0.420012	2.12903	0.0683292	1.0263	0.691311	-0.342435	-0.776693	-0.719871	0.450999	0.616317	-1.16831	0.232448	0.862389	0.726791	0.946368	-0.561715	-0.320378	2.8859	93	-1.69558	-2.3657	-1.54078	-0.160763	0.205886	0.355578
94	0.506902	0.466755	0.38972	-0.290225	2.83376	1.23734	-0.482889	-0.229216	-0.00489525	1.39453	1.99282	0.436094	0.817101	1.20743	-0.18933	-0.198646	-0.366269	-0.887098	-2.0533	-0.939562	0.984173	-0.262963	0.636305	-0.775777	-0.165648	-1.98167	-2.34419	0.683394	0.720684	0.434635	-1.06221	-1.51713	0.970411	-0.423045	-1.08826	-0.0166132	1.47302	2.47856	-2.12338	-1.69667	-0.938846	-0.525355	94	-1.33459	-2.67954	-1.11219	0.413141	-2.06644	-2.43487
95	-0.256139	0.237364	-0.764547	-1.35695	1.80155	0.390727	-1.44155	0.551748	-1.59852	0.230528	0.781776	-0.424547	-0.969112	-0.476	0.243929	-0.175027	0.211866	0.662769	-1.78086	1.44102	-0.00715314	0.256886	0.783665	-1.82883	-0.165526	-0.225229	0.310961	-1.61254	0.458264	1.12321	0.920715	2.84216	-2.64242	-0.214049	-0.435694	-2.20256	1.28803	1.97518	0.135288	-1.75311	-0.584574	0.496257	95	-0.508546	-2.03239	-1.03716	0.0801468	1.46567	-1.52391
96	0.533527	-1.5624	-0.402118	-2.11902	1.69493	-0.219526	-0.0877941	0.682024	-2.54939	-0.797793	0.76361	0.350774	0.630839	-0.941856	0.0826387	-0.469169	0.39217	-0.709928	-1.73173	-1.21411	1.6198	-0.617455	0.812982	-0.641301	-0.568797	0.766363	-0.234087	0.126752	-2.84666	-0.493331	1.15069	-1.10057	0.437706	-0.408608	-1.08342	-1.31339	1.59063	2.479	-2.17372	-0.373725	0.131256	2.26028	96	0.0473651	-1.53366	-0.747878	1.01695	-1.58715	-0.935191
97	0.542616	1.76887	-0.385807	-1.44952	-0.30346	0.077879	2.51955	0.248474	-1.43741	1.02795	0.945725	2.15877	0.337828	-0.752718	0.481647	-0.792458	0.363183	0.454757	0.0913974	0.918363	-0.232791	-1.24232	0.302923	-0.780273	-0.203137	1.88865	-0.830509	-0.570055	1.11274	-0.569759	-0.288073	-0.926913	1.95881	0.585416	-0.737824	-2.10727	2.63713	-0.448636	-0.735934	1.22453	1.62976	-0.949646	97	-0.670951	-2.78321	-1.73115	1.66641	-0.128179	-1.16627
98	0.215686	1.78654	-0.0395343	-0.615416	0.395871	1.65983	-0.280583	1.04612	-1.2342	1.68078	0.197426	0.388927	-0.706185	1.83544	0.868314	-0.461563	0.345134	0.0637669	-0.475951	-0.064707	-0.310897	-0.412064	0.899137	-1.55128	0.176718	0.889945	-0.411004	-1.21148	-0.798038	0.570679	0.229855	-1.1565	-0.670522	0.252184	-1.38099	-1.70038	1.59963	1.54232	0.282392	-0.133266	-1.03082	0.721237	98	0.0762727	-1.25747	-2.58085	-0.929987	-1.29137	-1.69167
99	-1.23388	0.842533	-0.0917681	-0.176084	0.193929	-0.821441	0.675467	2.77491	-0.201173	0.435645	0.866805	1.13602	0.044281	-0.00702045	-1.01639	1.0374	0.675235	0.832856	-1.72302	1.20199	0.267555	0.0303562	0.0220398	-0.876918	0.000781527	1.52709	-0.166659	-1.13327	-0.969786	0.278468	-0.666872	1.92869	-1.2023	0.503076	-0.913532	-1.71194	-0.0625771	-0.841365	-1.05143	0.0660537	0.510344	3.87143	99	-0.891469	-1.38254	-0.11908	1.2619	-0.157754	-3.02691
100	0.618808	0.213241	0.193139	-0.79603	0.761954	0.3862	0.132143	2.42809	-1.22708	-0.149542	0.760267	0.183693	-0.570419	1.8371	0.178057	-0.0588739	0.236568	0.330264	-1.11902	-0.123544	-1.25899	-0.121965	0.800249	-0.1541	-0.823224	-0.506155	1.23311	0.747851	-0.231795	-0.316646	-0.167651	-0.967244	1.07586	-0.893811	-0.532658	-0.480147	1.93895	0.790254	-3.00634	-1.54576	0.537502	0.867155	100	-0.179613	-2.25216	-1.50574	1.5405	-0.775819	-0.340525
101	-0.585456	-0.293767	-0.504	-1.79767	-1.78683	1.8934	0.27957	1.07809	-1.75919	0.855551	0.642455	-0.392265	-0.644181	-0.422943	0.345892	-0.310473	-1.0622	0.20041	-1.35944	2.38873	-1.62376	-0.564526	-0.994285	-1.16216	0.497534	1.27765	1.07792	0.0415706	0.93549	-0.337371	0.844297	-2.36775	-1.79592	-0.512137	-0.383943	-0.216533	2.2912	0.140614	0.685009	-0.420195	-0.0316858	0.473542	101	-0.0881341	-1.135	-1.77566	1.95089	-1.13789	-0.120288
102	0.167199	-0.678064	1.25427	-1.54406	0.0870709	-0.0823829	0.855191	0.602959	-0.72545	0.0558866	0.380475	0.136863	-0.297891	-0.27033	-0.401693	0.360817	-0.530897	0.777278	0.257009	0.35064	-1.10527	-0.416715	-0.365155	-1.56353	1.21713	1.02637	-2.1455	-0.0646384	-0.0909242	0.56555	-0.994083	1.98407	-0.650643	-1.2365	0.183239	-1.20517	1.22755	0.686728	-1.41651	0.642852	-0.431731	-2.30679	102	0.0628665	-0.903859	-1.59223	2.0975	-0.931632	-0.401295
103	-0.188371	0.654044	-0.728475	-1.15966	0.344908	2.45888	0.775833	0.854274	-0.214534	0.208956	-0.971885	0.133215	-0.395559	-0.188889	-0.835463	0.354011	0.819812	0.663848	-1.75457	0.342662	-0.901661	0.00980849	0.104925	-0.562751	-0.937675	0.118656	-1.59637	-0.335603	0.180249	0.386559	1.35659	2.57657	0.225221	-0.112833	-0.925698	-1.27829	2.36619	-0.716884	0.866588	-1.76263	-0.444759	1.87556	103	-0.0524626	0.31427	-2.15825	1.87851	1.28565	-0.437764
104	-1.96109	1.61968	1.10602	-1.42888	0.418244	-0.707172	1.48578	0.725364	-0.351843	1.1034	0.683541	0.208456	-0.46061	0.110954	0.208836	-1.47649	1.23936	0.694	-0.599522	-0.0868131	-1.63854	0.46407	-0.0320014	-1.58725	-0.723301	0.693233	1.0509	-0.147677	-0.00710107	0.386645	-0.843742	-0.158864	0.875804	-0.472132	0.534102	-0.183362	1.94211	0.196532	-0.9865	-0.821284	0.122598	-0.280409	104	1.12266	-1.85166	-1.41753	1.25438	-2.32858	0.480151
105	0.146935	-0.812297	-0.359333	1.10448	0.342534	-0.18605	-0.873654	-1.38006	-1.39363	-0.104426	0.658437	1.3254	0.186957	-0.0894703	-0.21462	-1.10033	0.533501	-0.272736	-1.43171	-0.34879	-0.768131	0.0651696	-0.979816	-0.623415	0.136344	-0.377075	-1.73636	-0.0417558	0.868344	0.418108	0.949477	1.24731	1.55733	-0.366902	0.463829	-0.316483	0.417422	-0.925461	-0.79752	-0.635722	-1.86172	0.0126059	105	-1.7334	0.119573	-2.1006	1.92652	-1.31806	0.478789
106	0.436791	1.78162	-0.129936	0.972856	-0.766096	-0.67611	0.167108	1.82091	-0.38516	1.20967	0.0458518	-0.15467	-0.706443	-0.322132	-0.564307	-0.218877	-0.159722	-0.110289	-0.759455	0.237207	0.0153557	0.629153	-0.278689	-1.29596	1.3332	-1.1138	0.366549	0.346584	0.360712	-0.518511	0.298632	0.286293	-0.0841259	-0.0284449	1.32294	-0.799189	0.888205	1.63116	1.34071	-2.35568	-0.982078	1.07238	106	-0.89945	0.170191	-3.03853	1.4162	-2.86257	-3.61514
107	0.314909	0.468851	1.31049	-0.908965	-0.216806	1.63215	2.03429	-2.01305	-1.99596	0.88041	-0.904767	-0.139081	-0.169814	2.12817	-0.837194	0.167479	-0.240221	-0.603133	-1.13638	-0.606204	1.1582	0.731784	0.914751	-0.32292	-0.827674	0.849399	0.522045	-0.530786	0.542559	-0.039269	0.126296	-1.80831	-0.105648	-1.73081	0.286282	-0.949455	3.14534	1.17745	-0.401976	0.08399	-1.61983	-1.52274	107	-2.23281	0.540311	-0.97241	2.19499	-1.61649	-1.17932
108	0.522351	0.704861	0.320004	-2.8787	0.808746	0.61599	-0.549099	0.433728	-1.33784	-0.544831	0.285179	0.912329	0.350389	0.810536	0.0693049	0.461638	0.262712	-0.424139	-0.96488	-0.623172	0.0182364	-0.676319	-0.748697	0.424499	0.656926	1.71948	-0.20296	-0.500565	0.141765	1.07465	0.845216	-0.864579	2.62904	-0.342112	-1.00446	0.0582944	0.120544	2.97059	-0.250233	0.75469	-0.836458	-1.15179	108	-1.2201	0.717634	-1.14861	-0.16049	-0.515948	-2.31407
109	0.0358398	0.343746	-0.595981	-0.266377	0.539637	0.137441	0.593084	0.474172	-0.729921	0.603494	0.528166	0.188365	0.0528563	0.0726224	-1.37732	-0.378224	-0.225221	0.791543	0.18994	0.593511	0.0554247	0.351499	1.03556	-0.957559	0.213643	-0.661971	-0.43292	0.86047	0.0567112	0.296388	-0.370109	-0.819345	0.491099	-1.53161	0.086739	-1.19285	1.93883	2.59522	-0.415924	0.844833	1.43971	0.599073	109	-1.30286	0.848039	-1.06323	1.71498	1.18153	-1.89687
110	0.513878	0.62039	-0.616487	-0.225668	-0.564752	1.39392	1.05069	-0.706835	0.140897	-0.210933	0.257661	0.327316	0.322839	-0.190974	-0.188193	-1.22407	0.789429	-0.184234	-0.152967	0.0618483	0.733944	0.457833	0.251453	-0.365204	-0.330602	-0.302481	0.665346	-0.142886	-0.60485	1.29996	-0.528432	-1.45532	-0.321404	-0.00839954	0.831727	-0.801451	0.17281	1.66434	-0.991834	-2.4609	-1.35525	-0.52368	110	-1.0245	-2.42023	-2.16541	1.78389	-0.908588	-0.140653
111	-0.152538	0.441905	-0.199381	0.117472	-1.54668	1.06496	-0.0103643	-0.150683	0.622924	1.7541	0.795506	0.828901	-1.74835	-0.254053	-1.01574	0.290913	-0.380358	0.0384648	-0.340239	-0.351931	0.254629	-0.00868518	-0.243181	-0.934923	0.894658	0.784471	1.38734	-0.200052	1.30488	0.458508	1.00191	-0.0851124	0.030035	-0.862105	-0.647073	-0.139841	-0.804714	1.52038	-0.954433	-0.576679	1.04054	0.653687	111	-1.09811	-2.43764	-0.968242	0.271431	-1.08382	-0.831929
112	1.7141	1.15432	0.276512	-1.66198	1.00291	0.74002	-0.508085	0.864583	-1.30059	0.0636648	-0.295541	0.642728	-0.988355	-0.403891	-0.637085	-0.378301	-0.398774	-1.52366	0.0826607	-0.684099	-0.582118	-0.0805553	0.481734	0.457618	-0.698911	1.82125	-0.568571	-1.8047	-0.494236	1.59883	-1.07123	-0.826739	1.65732	-0.86143	-0.423394	-1.58586	1.05048	0.58725	1.03623	0.55335	-0.0889501	-0.069867	112	-3.58449	-1.2749	-1.67351	0.306654	0.367306	-0.982856
113	0.298086	0.761721	-0.502766	-0.409064	2.22281	0.121884	0.990178	2.11524	-0.16458	0.694605	1.10414	-0.507147	0.179914	-0.178048	-1.04539	0.068088	0.517241	0.833244	0.730172	-0.086168	-0.226596	-0.28012	-1.3095	-0.885229	-1.12018	1.93185	1.9052	-0.601252	-0.954768	-1.74226	-0.707107	-0.43334	-0.332602	0.404433	-0.0213617	-0.143346	0.821456	-0.473929	1.28134	0.0515556	-2.59604	-2.47259	113	-3.5593	-1.41919	-1.46214	2.12669	-1.37143	-1.18499
114	-1.26441	0.566645	-0.0972014	1.7245	0.507787	-0.66042	1.69565	-0.218255	-1.15087	0.240258	0.527793	1.27646	0.264992	0.651253	-0.163334	-1.41889	-1.19774	0.998117	0.0191133	0.497428	0.107461	-0.451654	0.626303	0.789217	0.949022	1.51302	-1.07381	0.28485	-0.851972	-0.781526	-0.7042	0.0822322	0.378672	-0.962738	0.103023	-0.348013	0.795874	-0.0757806	0.950307	0.0454584	-0.761947	1.26588	114	-3.38922	-0.765429	-0.908643	1.7622	-2.67202	0.316793
115	0.63714	-0.431088	1.61124	0.480569	0.671989	0.121311	0.735882	0.300743	-1.0755	0.505878	0.0115126	0.12407	-0.696133	1.06476	1.05384	0.187138	0.19643	0.51983	0.239427	0.0438786	1.65047	0.148556	0.989649	0.76986	-1.24351	-0.096809	-1.19431	-0.336719	-0.521136	-0.419818	0.0366408	-0.787981	0.54912	-0.378051	0.169908	-0.765978	0.85966	0.36297	1.05933	-1.43564	0.181527	1.71842	115	-2.02623	-0.9689	-0.361812	0.91135	-2.43226	0.238657
116	0.543672	1.41387	-0.348403	-0.0757457	-0.112407	1.24428	0.765738	0.120107	-2.06614	-2.18916	-0.991864	0.614804	0.185298	-0.477073	0.0936915	0.177918	-0.584295	-0.204403	0.177823	-0.0370782	-0.0663369	0.407491	0.235637	-0.184868	0.192436	1.20635	0.0274828	-0.838561	-0.67508	-0.581389	-0.234106	0.922502	-1.04166	0.00120641	0.371093	-0.453909	0.874585	0.816967	-1.07272	1.12675	-0.906046	0.889265	116	-1.53211	-0.133587	-1.76347	0.968538	1.47758	-2.73008
117	0.435945	0.417205	-0.47646	0.0025008	0.206869	-0.272136	-0.0307629	0.334103	-0.37776	1.86978	0.839927	-0.153506	-0.242482	-0.968037	1.32112	-0.675522	-0.182186	-0.753267	-0.868031	-0.378759	0.736821	0.879713	-0.388521	-0.443516	0.345823	-1.06784	-0.533884	-0.256906	1.91985	1.37513	-0.824262	0.324932	0.386035	0.840659	1.91695	-0.777202	0.96464	0.669341	1.22601	1.98754	1.087	-1.0569	117	-1.30462	-1.65936	-0.247093	-1.08116	-1.38894	-0.695641
118	-1.928	-1.16664	0.22477	-0.805104	1.5806	-0.0601644	1.08696	-0.0286907	-2.02119	0.303412	0.437938	0.461692	-0.010271	0.378214	-2.21885	-0.585728	0.375386	-0.00552191	-1.33554	-2.35627	0.682466	-0.942292	-0.19332	-0.624558	-2.65344	0.926921	0.35102	-0.391271	0.870965	-1.05175	0.915707	1.79443	-3.50749	-0.334021	-0.476844	0.183951	0.82999	-1.43453	-1.31518	-2.15609	0.291561	0.31533	118	-1.63209	-0.940605	-1.11538	0.269118	-1.58612	-1.45139
119	0.66277	0.898295	0.705306	1.27689	0.471754	-0.516947	-0.807457	0.944462	-1.07559	1.29764	1.20437	0.909646	0.122483	1.35466	-1.21007	-0.128005	0.172425	-1.17542	-1.72855	-2.61444	0.908361	-0.0708638	0.314196	-0.482773	-0.194363	0.112886	0.269128	-0.588845	0.720433	-0.235422	1.32251	0.708467	-2.20398	-1.37505	0.612358	0.0930919	1.4947	-0.4561	-1.61366	0.0540864	-1.6136	1.07442	119	-2.03262	-0.798355	-1.1829	1.09588	-0.0443951	-1.38985
120	-0.126047	0.752375	0.195993	-0.144115	-0.5924	-0.741071	0.930313	1.44268	-0.33563	0.152444	0.10315	-0.409002	0.0213658	0.751724	-0.339586	-0.326629	0.283895	0.764396	-2.56548	0.958232	-0.889685	0.189725	0.324694	-0.966726	-0.0837856	-0.0781765	-0.0478706	-0.660753	-0.883935	-0.571977	-0.922691	-0.603879	1.63629	0.526882	0.0593494	-0.761336	1.44881	1.70423	1.07911	-2.37882	0.104239	0.693413	120	-2.59429	-0.762589	-0.691074	2.68948	-1.74637	-1.29234
121	1.68133	-0.302143	0.768536	0.0337456	-0.0351494	0.185304	1.34783	0.783122	-0.945546	1.2165	-0.185122	0.589151	-1.31998	0.324403	-0.967892	1.17861	-0.87073	1.41474	-0.543377	1.92924	0.145272	-0.653744	0.578637	-1.21294	-0.327473	-2.36668	0.677208	-0.168295	0.923597	0.303879	-0.147452	-1.01529	-0.765605	0.0293757	0.598801	0.0269349	2.19955	-2.59901	0.332348	2.63939	-1.69839	0.933599	121	-0.552219	-0.303166	-1.48851	1.98433	-2.58121	-1.24099
122	-1.99808	-0.269661	-0.5605	0.919214	0.207983	-1.47078	0.780709	1.38313	-1.00718	1.21601	1.10353	-0.60222	0.103811	0.914339	-0.371418	0.734149	0.205229	1.16829	-0.640342	1.0971	-0.948061	0.654345	-0.429125	-1.88363	-1.19435	0.858624	-0.481404	-0.587114	0.938265	0.787762	1.97859	1.19784	-0.478706	-0.289695	0.537229	0.083176	-0.153752	0.834136	1.45927	0.586835	-0.363444	0.510638	122	-1.24993	-0.722323	-3.35045e-06	2.17736	-0.827786	0.261868
123	0.20393	-0.0292316	0.662091	1.13615	0.463319	-0.170262	-0.0655169	-0.142751	0.469292	1.44119	0.793592	0.180813	0.475991	0.610237	0.238032	1.08225	1.66063	-0.55176	0.556209	-0.290768	-2.1078	0.537881	0.712727	0.39767	0.476874	0.631456	1.19635	-0.0146019	-0.539123	-0.324176	0.229884	-1.29173	-1.37925	-0.844669	-0.232646	-1.29321	1.8192	1.27065	1.89738	-0.563482	-0.382965	0.052255	123	-1.28783	-0.745923	0.00882056	1.07735	0.371676	0.236445
124	0.0223315	0.640778	-0.780974	-1.55915	1.02838	1.11421	-1.61525	-1.34876	-0.228676	-0.510558	1.47094	0.773218	-0.108682	1.04173	-1.05739	0.0372176	-0.609985	0.201176	0.222276	-1.23485	0.0910482	0.257171	-0.263496	-1.21891	-0.637809	-0.268451	-0.914288	0.763527	1.59011	-0.0438791	0.248916	-0.29589	0.888808	-0.68727	0.313038	0.411786	2.35822	-2.13576	-2.13328	-1.43082	1.1084	1.72638	124	-1.69305	-0.105719	-0.859659	-0.563222	-0.265023	-0.775197
125	-0.0801591	1.48419	0.664078	0.741239	0.822498	1.14454	-0.90895	-1.31587	-0.876575	0.968142	-0.0827539	0.768533	-1.00218	0.795542	-0.0107549	-0.301867	0.836553	-0.14744	-0.144613	-0.987621	-0.289422	-0.349886	-0.244821	-0.882776	0.169279	1.06125	0.76166	-0.334635	1.18901	0.0910212	0.913719	0.343167	-0.0279813	-0.441662	0.101101	-0.856297	3.23022	0.909998	0.931548	0.411498	0.0836578	0.868921	125	-0.629431	-1.04765	-0.272647	-1.33313	0.123472	0.734952
126	-0.334188	-0.382388	0.382645	-2.64647	0.98095	0.489382	-1.11012	1.8436	-0.634904	0.54173	-0.771037	0.471295	-0.173105	0.252876	-0.508378	-0.201189	0.175502	-0.732553	-0.42223	-1.32058	0.105935	-0.268098	0.833241	-0.294556	-0.221824	-0.731945	1.29856	-1.51456	-0.690619	-0.144844	-0.58454	-0.142211	2.42429	1.43558	0.976013	-0.336286	2.7789	-1.45957	1.30709	-0.301514	1.31335	1.00018	126	-1.61464	1.04673	-0.463997	0.446993	-1.03955	-1.92612
127	-0.273472	0.957924	-0.0231999	0.0263534	0.727911	0.187441	1.08323	0.508557	1.09258	-0.500878	0.332095	0.476532	0.506467	0.97137	-0.279207	-1.11512	0.132292	1.14217	-2.7906	-0.816515	-0.828621	-0.620769	-0.0282567	-0.128793	-1.36086	0.888268	0.00387594	0.0591542	0.326243	0.608196	0.92049	-1.06926	-1.30565	0.453028	-0.571108	-0.342963	2.52721	0.981598	-0.737744	-0.724962	-1.4543	0.660961	127	-2.55509	-0.257202	-0.626755	-0.470467	-1.08798	-0.816176
128	-0.107712	1.47283	0.0100817	-0.0148864	1.07106	0.375901	0.284873	-0.638004	-0.628086	0.0701403	-0.296423	0.598366	0.980792	0.965056	-1.36922	-0.553351	0.8577	-0.914146	-2.78853	-0.939405	1.81655	0.193544	0.13422	0.0265435	1.03129	1.34004	1.94916	-1.30634	0.393621	-0.0907875	1.91933	-1.99285	-2.16542	-0.406286	0.605615	-1.26598	2.41679	-0.142432	0.0997158	-0.0467714	-1.23028	-0.376693	128	-2.70032	-0.0174126	-0.588316	3.78581e-05	-0.695591	-2.25704
129	2.28294	-0.581433	0.859663	-1.54761	1.15915	0.0599804	0.0628335	0.564621	-0.706679	0.857909	-0.279252	-0.234343	0.545312	1.02433	-0.733736	-0.734191	-0.408374	-0.788055	2.93322	0.173062	-0.307933	0.0951717	0.910466	0.0704285	-0.211917	0.0748258	-0.11451	-0.723625	0.653032	-0.22625	-0.386799	-0.326894	-1.11899	0.319058	1.40688	0.0483603	2.07263	0.73168	-0.0671864	-2.64803	-0.442748	-2.26869	129	-3.51569	0.939779	0.269643	1.04582	0.0695279	-0.478339
130	-0.0823859	0.905461	-1.18	-0.505128	0.578314	0.604266	-1.87572	-0.319363	-1.1439	1.32806	0.513799	-0.194208	-0.701865	1.33089	0.607719	-0.0187739	-0.548379	0.775758	-1.46211	0.278319	1.21872	0.182825	0.146038	-1.61725	1.28624	0.689056	-1.27009	-1.15418	0.959412	-0.037362	0.334649	-0.193496	0.639447	-0.069903	-1.14276	-1.8133	1.55088	-1.8985	0.0485825	-0.526783	1.22617	-3.20496	130	-2.94641	1.79977	1.35347	2.15953	-0.427721	-1.74495
131	-1.00748	0.361464	0.715723	0.354954	-0.16587	0.605882	0.184054	1.74343	-2.38993	0.129736	-0.909528	1.18739	0.935058	0.457388	-1.48258	-0.0100253	0.211346	0.296498	-1.43076	0.270758	-0.294429	-1.13273	-0.837418	-0.144845	-0.120866	0.788017	-0.16939	-0.454389	-0.078685	0.328083	-0.25818	1.65622	-1.19212	-0.466397	-0.141625	-1.32933	-0.411497	1.63822	0.516715	0.553228	1.2673	1.94449	131	-2.50284	1.3007	0.402616	1.75204	-0.176802	0.638383
132	-0.0965008	0.747151	0.324508	-0.864574	-0.192664	-0.85951	0.83427	0.896787	-0.585941	0.872613	0.894521	0.541408	1.0657	0.977329	-0.788913	-0.259061	-0.138098	1.07543	-1.29939	-1.21258	-0.877714	0.376617	-0.477475	-0.045709	0.426119	-1.54572	-0.509726	-0.362588	0.768959	-1.87537	0.880438	0.799203	0.530622	-0.548837	-0.265754	-1.21511	-0.522957	1.56359	0.600871	0.301317	-0.721717	1.3036	132	-1.64633	0.472018	0.363782	1.24311	-0.509143	0.49869
133	-0.216555	0.844444	0.202654	-0.456101	1.09343	0.648242	0.451817	0.373057	-0.846771	-0.380645	0.9439	0.458572	0.752843	0.247203	-0.40368	-0.00213943	-0.728105	0.0628784	-0.648424	-0.730853	-1.38027	-1.01941	0.483079	-0.27941	0.22347	1.28247	0.553385	1.71834	-0.513462	-0.104836	1.67294	1.09967	0.359703	0.549333	-0.269242	-0.457831	1.5301	1.4789	1.62338	1.26169	-0.0324981	-1.03347	133	-0.372199	0.32876	-0.83073	-0.890949	-0.508659	-0.40742
134	1.04328	0.265122	-1.37046	-0.178709	-1.66102	-0.319109	0.361244	-0.0954112	0.0634973	0.228512	1.03526	-0.389679	-1.10956	1.13716	-0.50606	-1.22878	-0.908931	-0.037222	-0.47981	-0.0645525	-1.97396	-0.533075	-0.10874	-0.729254	0.301439	-1.1068	0.636116	0.728746	2.03208	0.435233	-0.633549	1.54935	-0.522814	0.0361435	-0.0994813	0.111569	-1.86362	1.41741	0.716951	0.728582	0.135735	-0.725947	134	-1.1034	2.19903	0.43398	-0.192501	-2.02415	1.54419
135	1.38932	0.936216	1.2527	-0.39705	-0.0268038	-1.59651	-0.276398	0.0322018	-0.614212	0.226314	-0.0486437	1.42113	-0.714157	0.250026	-0.728961	-0.550332	-0.79828	-1.2749	-0.122048	0.901489	-1.80994	-0.703555	0.713437	-0.505398	-0.460251	1.08816	-0.0278812	0.740493	-0.575704	-0.0899393	0.461732	2.04903	0.127826	0.359428	0.0180423	-0.927055	-0.198205	1.05989	0.48768	-0.305976	-1.64641	-0.329819	135	0.523785	1.71133	-0.643548	0.615153	0.377583	-2.00573
136	-0.483682	0.698296	0.284742	-0.0592949	-0.892165	-1.46407	-1.39585	-0.171332	-0.479703	0.0219191	-1.02289	-1.0034	-0.363988	0.986178	0.272995	0.536949	-0.530059	-0.113318	0.96495	0.354602	-0.636742	1.00171	-0.0598582	-0.545469	-1.16937	0.759902	0.577972	-0.391961	0.585561	0.737386	1.17634	3.18097	-0.698562	2.5795	-0.772506	-1.19852	0.528191	-0.312952	1.18567	0.0322318	-0.976922	0.371226	136	-0.417413	0.698104	0.0619594	-0.126313	-0.420454	1.16978
137	0.11201	1.15445	0.843148	-0.301835	0.266565	-0.754207	-1.00162	-0.565878	-0.0757699	0.51156	1.18338	0.588137	-0.344369	-0.14728	-0.42629	-0.186491	0.502807	-0.373734	0.470838	0.650925	-0.123702	0.762187	0.824705	0.714756	0.297086	1.21341	0.76935	-1.54501	0.761153	-0.752201	0.213611	-1.50205	-0.307438	-0.289104	-0.513924	-0.656626	-0.487619	1.31427	-2.48012	-0.664157	0.893523	1.00195	137	-0.551411	1.2847	-0.226397	0.637516	-2.30296	1.80138
138	-0.248589	-0.518301	0.265772	0.375402	0.974029	-0.210233	0.618015	0.920936	-0.084442	-2.7186	-0.0373366	-1.61512	-0.246451	0.461961	0.215754	0.0964961	0.197643	-0.514884	-1.08782	1.29376	-1.40791	0.0985233	-0.0977103	0.421742	-1.5229	0.291802	-0.415214	-0.704519	-0.477027	0.294276	0.250411	-2.10378	-0.808454	-0.0716606	-0.91279	1.38612	0.641916	-0.0106465	1.41514	-1.86156	0.506795	1.3052	138	-0.00256823	2.97678	-0.0040059	2.16469	-0.0199983	-1.91353
139	-1.07803	0.326036	-0.52411	-0.290662	0.461133	-0.767216	0.460902	2.2029	-0.794178	-0.472487	-0.278048	0.894037	-1.58164	0.198758	0.704934	-0.535782	0.167017	-0.183141	-1.39379	0.0331575	0.634755	0.619051	-1.28832	-1.22647	0.529289	1.47134	-1.22152	0.283213	0.0361023	0.230089	1.6166	-1.47031	-1.79282	0.243084	-0.85705	-0.782178	1.4565	1.5328	0.376835	-2.24189	2.24011	-0.280492	139	0.539829	2.12132	0.558413	-1.67832	-0.0965093	-0.8928
140	-0.150691	-0.434566	0.340134	1.22235	-0.214302	0.479313	1.1558	2.65703	-0.851829	-0.240206	-1.0512	-1.12592	-0.901066	1.04197	-0.276739	-0.212132	0.433325	0.149584	-0.806417	-2.47005	0.847501	1.02741	-0.737746	-0.524241	-0.866963	1.37762	-0.360916	1.02304	-0.22842	-0.146436	0.365975	-1.357	1.16284	1.2392	-0.637427	-0.838126	0.638631	1.43576	-1.78172	-0.92551	1.41307	0.182377	140	-0.0855224	3.40156	1.61495	-0.672002	1.8367	0.303555
141	0.257591	-0.057723	-0.746752	0.438357	0.172749	-1.11926	0.771743	-0.859637	-0.865063	-0.988828	-0.0720942	-0.527837	0.123995	1.34279	-1.43979	-0.110382	0.403049	0.00095677	-0.866662	1.44948	-0.0588023	-0.402993	-1.74503	0.383064	0.38969	0.354822	-0.927768	-1.92428	0.473258	0.312204	-0.179454	1.3377	1.98703	0.934722	1.88553	-0.278081	0.92032	0.455991	-1.10902	-0.566532	0.840016	0.484193	141	-0.680375	1.89238	0.760289	-1.21366	-1.02778	-0.77224
142	-0.517212	-1.19683	0.405797	0.169317	-1.29617	0.312365	-0.802756	0.0161133	-0.37846	1.21362	-1.32656	0.51167	-0.035773	-1.45586	-0.141678	0.324014	-1.79102	0.203311	-2.11318	-1.13715	-1.02304	-0.287005	0.686981	0.362402	-1.64135	-2.75879	0.93323	0.117954	0.349727	0.965437	1.47364	1.61734	-1.26129	-1.29076	0.0442388	0.329108	1.90884	-0.277047	-3.35893	2.28914	-0.958128	-1.19578	142	-0.58532	-0.817426	-0.271418	1.87145	0.531966	1.32243
143	-0.400226	-1.23883	0.448124	0.199911	-1.10153	0.649983	0.121487	0.428089	-1.42259	-0.453229	-0.114223	0.124917	-0.373176	0.126872	0.19173	-0.836628	0.294382	0.229812	-0.220174	0.49899	0.511831	-0.886249	-1.43343	0.0773333	1.01448	0.482736	1.00487	0.50635	-1.74613	-0.406977	-0.398034	-0.263156	-0.769039	-0.832548	-1.77588	0.398597	-4.10934	-0.980171	0.774173	-0.917002	1.43463	1.96486	143	0.420712	-0.178178	0.466761	-1.58986	-2.94791	-0.456402
144	-0.262351	-0.238101	-0.192827	-0.951663	0.0771736	0.178375	0.826543	-0.708137	-0.391211	1.05802	0.540536	0.432104	-0.636734	0.840545	-0.308304	-0.695114	1.24058	0.299835	1.26032	0.683533	-0.179954	1.31608	1.49693	-0.356554	-0.32858	-0.0327153	-1.16465	1.95326	-0.22407	0.0342585	-0.213799	-1.12032	-0.908365	-0.0363235	0.351973	0.119721	-0.154251	-1.8893	1.67759	0.0303875	0.626693	1.05586	144	0.82232	-1.34441	-0.86354	0.995781	-0.429608	-0.420408
145	-0.873702	0.781026	1.31923	0.545192	1.24441	-0.300668	-0.133614	0.591925	0.73845	1.26279	-0.39832	-0.104179	0.417018	0.797737	-0.341734	0.204131	0.428661	-0.476875	-0.0350983	1.11781	1.41815	0.72085	1.21255	-0.95738	-0.73529	1.29042	0.464776	-0.952152	0.746769	-0.0592508	-1.29711	-0.604526	1.61365	0.792417	-0.0104835	-0.510602	0.651373	0.0956414	0.379413	-0.897305	0.107344	-1.50984	145	1.05413	-0.168882	-2.1488	-1.04692	1.40582	1.9439
146	0.293628	1.15778	0.44123	0.59543	-0.59655	-0.197403	0.522932	0.34859	-0.362402	-1.06275	0.621262	0.175922	-0.44471	-0.929215	0.371747	-0.208394	1.56954	-0.037378	-1.0371	-0.321259	0.486993	-0.219683	0.905273	-0.673194	0.83021	0.466648	0.927379	0.527555	0.30344	-0.775507	0.400913	-0.321767	-1.60779	1.02962	-1.24879	-0.370807	-1.37138	0.169881	-0.370429	0.712461	-0.396314	-1.787	146	-2.77291	-0.904872	-0.0463833	-0.871276	0.595353	0.80817
147	0.390008	-0.055653	-1.26402	-0.884827	-0.423052	0.361853	0.204224	-0.914473	1.32609	0.446888	1.17459	0.365121	0.138334	0.245695	-0.188472	0.303273	-0.221587	-0.795313	0.588095	-2.00382	0.722466	0.15663	0.0998642	-0.177939	0.227916	-1.17389	-0.423263	0.251284	-0.432599	0.0636254	-0.561198	-2.68447	-0.759549	-0.074278	0.41654	-0.346839	0.195849	0.0908697	-0.721521	-1.07527	-0.405032	2.20412	147	-0.482196	-0.770117	-0.442719	0.330436	0.416592	0.716651
148	1.07456	0.917488	-0.997624	1.1905	1.20807	0.527209	-0.296921	1.40503	-0.193339	-0.243351	-0.281263	0.209984	0.375082	-0.0384086	0.622044	0.798974	-0.776726	0.828401	1.24689	-0.666906	0.459545	-0.140871	-0.00882019	-0.0779283	0.0989988	0.766627	-1.07442	-0.116427	0.341423	1.19678	0.108318	1.47642	-0.527009	-0.386954	0.134443	1.18307	0.855479	2.07624	1.19233	2.24207	-0.394345	0.958359	148	1.20464	0.423643	0.787874	-0.252949	1.0222	-0.908214
149	-0.359018	-0.174538	0.652379	-0.592293	1.00216	-0.326032	0.65153	-0.0593351	0.0853883	-1.0423	-0.522582	0.146942	-0.240343	0.475227	0.424628	0.379702	-0.51214	1.00957	0.353816	1.66047	0.218769	0.535494	-1.32335	0.238534	0.0618122	-0.551279	-1.03107	-0.392557	-0.53313	0.28207	-0.276152	0.839227	0.828905	0.132316	0.256181	0.384103	2.12884	-0.00630933	-0.415287	-1.51417	0.986729	-0.36628	149	0.601851	1.74582	1.33103	1.41061	0.636702	-1.98353
150	0.396717	0.105385	-0.065537	-0.709921	-0.287265	-0.0864237	-1.86517	-0.248166	1.46313	-0.190856	0.37865	-1.33464	0.676308	-1.40538	0.80983	-0.159577	-0.634738	-1.26232	0.823092	-1.28115	-2.55596	-0.792251	0.109038	1.18166	0.0821094	1.15542	1.29092	0.0290086	0.721316	-1.61264	0.942874	-0.27646	1.40346	-0.268212	-0.0537642	-0.908268	-1.02572	0.264204	1.95169	-0.303782	-1.84159	-1.80849	150	0.417146	0.122043	0.426906	0.366382	-0.203337	-0.250364
151	-1.30029	0.291159	0.984967	-0.554488	0.743647	0.27797	-0.368868	0.0544929	0.185908	-1.39109	0.0717498	-0.0875727	1.21392	0.946118	-1.44804	0.175087	-0.00415426	0.72784	0.433918	-0.778236	-1.89552	-0.886137	0.138373	-0.262696	-1.0569	-0.699682	-0.471503	-0.441879	-1.4126	-0.421992	-1.18917	1.25034	-0.50928	-0.57341	-0.536285	-0.265725	-1.32649	-1.13669	1.13844	0.448052	0.734486	-4.27395	151	-2.44413	1.13211	-0.964984	0.908192	0.674437	1.16217
152	0.144488	-0.479416	-0.122411	0.509346	0.779267	-0.795623	0.0188563	-0.550542	0.432552	-0.861716	0.0784763	0.596032	-1.04058	-0.604798	-1.04699	0.849423	0.789372	-0.685097	-1.93246	-0.151992	-0.756334	-0.351686	0.120644	-0.268601	-0.536178	-1.29045	-0.783882	1.23812	-0.154341	-0.821372	-1.53967	-1.25553	-1.88444	0.369012	-1.78722	-0.56593	2.67271	1.86594	0.679517	1.21764	0.655677	3.06186	152	-0.215535	0.144372	-1.56788	-0.720058	-0.135332	1.48633
153	-0.672337	-0.00791147	-0.0321061	1.65747	0.750502	-0.177725	1.44112	-2.64958	-2.00011	-0.064882	0.8328	0.388803	-0.197594	-0.277892	-0.969197	0.505496	-0.309905	0.242926	0.234832	0.551938	1.01745	0.618439	0.213301	0.176471	-0.312197	-0.968436	0.867273	0.527833	0.324469	0.284783	1.13484	-1.88016	-0.430089	1.45029	0.506513	1.67717	-2.20935	0.769806	1.43358	-1.37158	-1.88693	2.76738	153	-0.594124	2.30962	-1.50888	-0.0533134	0.32268	0.364909
154	0.704865	2.11113	0.491414	0.833883	-0.466798	1.12935	1.15504	-0.466228	1.71519	-0.477566	0.323096	0.0876862	-0.0292492	0.658438	-0.0312401	0.477421	-0.119674	0.492252	-0.0916391	1.8242	1.10635	0.607699	0.221186	-0.55066	-0.661357	-1.01295	-1.69734	0.926267	-0.238438	0.0138926	0.722813	1.95994	3.14128	-0.0742296	0.17421	1.23026	3.01835	3.44937	1.27544	-0.296852	-0.296557	-0.327078	154	0.76719	1.92053	-2.25864	0.333288	-1.26663	0.514921
155	1.35857	0.483226	0.873976	3.62795	2.0449	2.61724	0.207951	0.330401	-0.791459	1.59931	-0.15093	0.241734	1.31052	0.394607	0.827645	0.577202	0.0282101	0.279762	1.75838	-0.110957	-1.24518	1.05923	-0.981993	0.572391	-0.489161	1.82218	1.63501	0.461592	0.818479	0.156385	0.460463	2.53532	-2.56884	1.42284	0.661692	1.60276	2.30838	1.88351	2.9786	1.35844	0.104277	1.14373	155	-0.104961	2.60717	-0.797231	0.76559	-1.16633	-1.22641
156	2.83481	1.24649	1.27457	2.28867	2.58987	1.4536	-0.0583362	-0.355302	-0.125422	1.96221	1.25343	0.237444	0.770298	1.06779	0.743672	1.92839	-0.375975	0.68628	2.25464	-0.719446	-0.192401	2.00321	0.30814	0.100218	0.406314	2.05807	-1.01996	-0.777893	0.768354	0.727976	0.579006	1.51523	-0.00569617	0.703691	1.60114	2.7332	2.96972	-0.612936	4.01325	1.15089	-1.05787	0.710519	156	-1.34955	2.40574	-0.622855	0.749732	0.607567	1.22026
157	2.7473	2.87882	0.535025	3.16153	2.35547	3.16708	2.26903	-0.914531	0.0160573	2.39082	1.68048	1.99435	2.29196	0.87817	1.28715	0.686417	-1.04749	0.893674	1.98763	-0.517363	0.81122	0.719835	1.66354	-0.669323	0.350365	0.0889576	1.16491	0.366611	1.52436	1.07411	2.29054	2.34167	1.43742	2.33857	1.56817	1.94196	2.43596	2.99313	6.46906	-0.766421	0.836825	-1.52361	157	-0.0415265	0.938449	-2.07721	-0.618836	0.290885	1.82815
158	3.56936	2.13372	2.62035	2.5196	2.84993	1.03042	2.03614	-0.150445	0.473043	0.875203	1.12369	1.37799	1.48605	0.680533	0.358565	0.334375	0.392815	-0.81345	-0.479354	-0.286395	2.44709	0.923123	0.5102	-0.494457	0.390951	1.71278	0.352649	2.16912	1.49198	1.94336	1.12333	4.36657	2.60938	2.01802	2.31259	2.20247	2.70635	5.35167	1.72657	0.467955	0.533549	1.71995	158	1.1837	1.12955	1.31438	0.313257	-2.48587	0.107711
159	3.96407	0.132103	1.80717	3.11799	4.438	1.34226	2.02593	1.17542	0.734803	0.816989	2.41118	1.36023	1.62789	2.30596	0.196818	0.833969	0.740818	0.642642	0.56736	0.1598	2.62534	0.298203	1.01895	1.11969	1.07701	0.905483	0.436402	1.82291	2.15349	2.39249	1.64482	3.28992	2.27932	2.99865	-0.456139	2.70734	7.29647	4.40865	2.251	0.766332	1.61272	0.0195838	159	-1.43814	1.57111	-0.721007	-0.235986	-0.212584	0.817845
160	5.33053	3.40579	2.42406	3.31004	3.7642	2.86971	3.54141	1.0826	-1.44333	2.90906	2.20706	0.223573	2.44343	2.51872	0.681397	0.994352	1.40369	0.0668314	2.3129	3.60588	3.33321	2.00517	-0.317206	0.640801	1.83894	2.17801	0.701254	3.50634	2.74982	1.12094	1.32375	5.18238	0.576014	3.75808	1.1335	4.18918	4.38125	3.91114	5.40533	2.42633	1.62819	0.56842	160	-0.707903	1.3067	0.0817189	-0.271709	0.237403	-0.630617
161	6.33246	2.63352	3.07864	2.99264	5.47468	3.80132	2.56768	1.1596	-0.613087	5.04721	0.060477	1.57077	2.74382	2.48598	1.70612	2.44685	1.0838	0.158912	2.11231	1.64482	2.94085	2.32734	1.4888	0.527078	0.272101	1.98071	2.31348	1.90827	3.25639	2.0996	2.55317	5.5734	2.16048	3.45091	1.77699	1.89338	6.80162	1.91792	9.38665	-0.451537	1.8363	1.99207	161	-1.46345	2.49902	-0.449025	0.992008	-0.953077	1.06475
162	7.0529	3.14049	4.76551	4.33225	5.5435	2.82211	2.10347	2.01728	-0.479841	2.62267	2.59546	2.66944	1.30504	2.37921	1.77595	1.46062	1.27792	-0.276287	2.7612	1.44723	2.12093	1.71304	0.35715	0.826219	2.26337	0.767672	1.9478	3.0312	0.968923	3.09295	1.73667	2.86109	3.70417	2.22297	2.09865	2.81039	6.41197	5.78305	5.70367	2.87784	0.691695	0.767954	162	-1.80518	1.2199	0.659919	0.576741	-0.0622924	-0.587629
163	5.62596	3.06243	5.5529	5.19999	6.24252	2.00105	1.58527	1.70107	-0.0930578	3.49492	2.42006	3.38922	2.91136	1.61434	3.17881	1.05337	1.93123	1.15758	1.77203	1.78884	1.82027	1.76948	3.01337	0.442282	1.54979	2.71753	1.30942	3.6553	2.67501	2.98537	-0.82404	5.12296	2.66514	4.1228	2.16405	3.1961	7.67243	4.4156	6.41267	2.33218	1.42318	2.83357	163	-1.25518	1.13123	0.386451	0.233596	-0.612144	0.848701
164	6.9407	1.36778	3.36295	4.04436	8.43347	4.57775	2.97784	1.0585	0.694635	4.13815	1.53285	0.323566	2.89514	0.90497	2.81896	2.31246	0.62591	-0.339096	2.06137	2.00986	5.20907	1.59403	1.12123	0.390535	2.49281	-0.0159821	1.31891	4.11822	3.35838	3.37548	2.2975	4.1342	4.35485	3.40712	2.91111	2.99111	7.17398	7.75704	10.6431	0.933193	0.57259	1.7069	164	-1.67067	2.26603	1.25289	-0.0640285	-0.920272	-1.91332
165	6.68845	1.86879	5.17027	3.43619	4.68545	4.77901	2.73995	0.435591	0.19486	2.70594	2.86331	1.82566	2.24437	2.78951	2.28667	2.78532	1.69602	0.311367	1.63676	3.12247	3.53324	2.41334	1.85941	2.11255	1.47557	2.71006	2.38403	3.42023	2.37137	4.02274	0.899027	2.90706	5.78154	4.39142	2.25348	4.37402	7.37103	6.90843	6.35505	4.39563	0.652169	2.43482	165	-1.747	3.18572	0.53355	-1.21447	-0.393105	-1.12637
166	9.17376	3.80177	3.84749	4.53457	5.7684	6.44835	4.43765	1.51044	1.59551	3.35915	1.77389	2.06376	2.4602	2.24166	3.22643	1.86232	2.53711	0.0986602	3.77445	1.69297	5.0253	2.08157	1.72089	1.16983	2.37729	1.05424	2.78582	2.48106	5.16914	4.58831	-0.226319	4.93484	7.47568	4.26456	1.2232	3.23498	4.29242	7.819	10.0061	3.1937	-1.0266	2.439	166	-1.36227	0.254202	0.890138	1.31318	-0.75389	-0.966767
167	7.31814	4.09622	3.40431	5.2938	6.66629	4.10025	2.33229	1.85295	1.73714	4.39487	1.5309	2.49338	3.0338	2.51759	1.96892	2.9699	1.06697	-0.570984	1.19646	3.63619	6.1548	3.53872	2.05137	3.15074	1.88317	2.18036	2.8113	4.25395	4.39677	3.25011	1.53949	4.2542	3.90338	4.94731	2.04365	4.8384	4.43843	5.78394	12.6523	1.20885	1.74858	3.59885	167	-0.716723	0.871749	1.18012	-1.15714	2.18735	0.823032
168	8.76936	4.69472	5.18772	5.17719	7.79531	4.39885	2.28239	2.17766	-0.285223	3.83327	2.86172	2.42428	3.0562	3.30864	3.11168	1.98423	3.02587	0.0956474	3.99069	4.16729	5.84891	3.86131	3.03661	0.521948	1.19281	1.14997	2.12515	4.3051	3.62466	4.45065	1.79026	5.36334	6.07745	6.32221	4.2814	4.15896	8.95127	8.35111	9.29615	2.17603	2.19697	2.47723	168	-0.482333	-0.457127	0.660458	-1.49859	-0.771167	0.341997
169	8.83736	4.55647	4.79116	5.40196	8.32512	5.88847	2.61054	1.04231	1.8109	2.19449	3.83658	2.14153	3.60316	4.33811	2.63005	3.03039	1.75577	0.942443	4.06551	1.01339	3.93631	3.72125	1.76372	1.6476	2.14801	1.89704	2.44106	3.74898	4.23715	4.49158	2.5378	3.39718	7.43689	4.58634	3.73956	4.6464	8.61884	7.67421	9.78562	2.4133	2.34306	3.35469	169	-0.868488	-0.295597	0.127861	-0.0155321	-1.10074	0.751069
170	9.0308	4.41558	6.42579	6.66686	6.02495	4.93323	4.15019	2.6909	1.97492	4.96728	3.4324	2.55869	3.03294	3.33605	3.65322	3.3786	1.55361	0.937886	2.6685	2.72998	7.07518	3.68619	2.07434	1.78672	2.53119	1.69643	0.444627	3.33342	3.4859	5.46625	2.83323	7.00518	5.31653	4.27062	4.20914	4.74486	8.14526	8.69917	11.2058	3.35431	1.62938	2.08294	170	-0.0698988	-0.640057	-0.747169	-0.878069	0.524824	2.71396
171	8.21504	5.02732	6.66159	5.20842	6.51545	6.45512	3.52418	-0.0979181	0.233158	6.53727	5.56819	4.08818	3.89103	2.51425	2.42808	2.54333	1.61179	0.213619	2.25166	3.04886	4.86042	3.02636	2.13429	0.260836	2.81152	3.29837	3.41211	3.64965	3.8091	5.86555	3.54291	6.15015	6.45153	5.41925	3.71639	4.46575	8.10528	7.82504	11.0583	5.07956	0.990638	4.09853	171	0.0341838	0.573754	-1.68847	0.27496	2.14014	-1.22414
172	6.13747	5.24339	3.98805	6.95552	6.21151	4.71887	4.05586	0.348653	1.72474	4.5556	3.2644	1.08445	3.65988	3.30399	2.73218	3.66566	1.954	0.660592	3.8017	-0.180079	4.86535	4.87998	2.80908	1.63105	1.77615	3.65421	2.02024	3.28986	5.49268	5.38291	2.16016	5.0235	7.36463	6.09665	3.59935	4.28743	6.68646	8.40056	9.39258	4.27316	0.207786	3.21632	172	0.315586	2.04212	-1.59553	-0.356687	-0.366471	-0.225184
173	8.32374	4.21223	4.99204	5.38081	5.40384	5.75874	1.66294	0.605337	-0.339007	4.68952	3.63037	1.99028	4.87664	1.19006	2.6093	4.40587	2.39228	0.898495	3.29014	3.58754	5.08774	3.80631	3.11467	1.5778	2.892	3.65036	3.98578	4.81632	4.05364	5.5838	2.29385	8.594	6.52888	5.73639	3.07219	5.59447	6.57273	6.46027	10.2923	4.86133	3.65765	3.9996	173	0.979093	1.85486	-1.6144	1.005	0.261083	-0.0146137
174	8.69838	5.38033	6.69591	5.24622	6.71597	6.74514	3.1724	3.34521	1.02106	4.43355	3.17723	2.80112	2.83236	3.30124	2.9021	2.55469	2.63117	0.504505	4.31517	0.555544	5.8729	4.4636	2.50257	2.07714	2.93119	1.33237	1.16549	4.43594	4.59924	5.87475	1.12405	9.00387	6.42852	6.8548	3.73505	5.28021	7.98732	9.79025	7.96049	3.77159	2.54938	3.83473	174	-0.0446927	1.22299	-0.957365	-0.0944478	0.611056	-0.481513
175	8.93249	6.04223	6.87617	6.19046	6.43466	5.98534	1.05691	1.91037	1.5017	7.21332	3.22399	1.61807	4.06356	3.75879	2.55636	3.14928	0.714887	1.47007	4.36025	2.65735	6.39854	4.2155	2.90246	1.31261	3.32522	0.999537	2.28316	4.42813	2.44462	6.5578	1.85911	6.72242	5.79735	5.58959	3.78853	6.7067	6.99928	7.0225	9.83042	4.00573	2.00015	4.79995	175	0.443186	1.29661	-1.43686	0.838741	1.01495	-0.124867
176	7.51129	5.77828	6.49082	5.77407	5.64529	6.55457	2.00701	0.783445	0.703571	5.20464	4.56566	1.88594	2.92964	2.4476	2.52698	2.91889	1.66623	0.647101	2.46465	0.986611	4.34849	3.7859	2.77761	1.72104	2.63601	2.00077	2.49516	3.46268	3.36915	5.45727	2.00727	7.26117	5.01755	6.45284	2.86655	7.03879	9.9603	8.34136	11.0648	5.86243	2.89044	1.18026	176	-0.727336	1.82536	-1.40567	0.824659	-0.442344	0.0581139
177	8.14881	6.32008	6.70879	6.26858	6.18913	4.97067	2.85429	2.85558	1.80601	6.74096	2.712	3.27022	5.48947	1.96586	3.58381	4.00496	1.60536	1.70015	1.40031	3.2418	5.67756	4.82364	2.89778	2.71375	2.41621	2.01754	3.36646	4.1096	4.24032	7.29807	2.5579	7.77778	6.73701	5.49826	4.72663	5.07492	9.11212	4.99998	10.6051	2.02366	1.13447	1.39498	177	1.39983	2.24624	0.295784	-1.42779	-0.0581448	-1.00513
178	8.94179	5.32313	6.58313	6.01051	6.49956	5.80667	4.37878	2.99189	0.165637	5.55254	4.885	3.15957	2.68961	3.09609	2.02855	3.25363	2.42944	1.07378	1.4812	3.3854	4.86795	4.13088	1.6795	2.13079	2.25908	3.29846	2.66259	4.58057	4.49215	5.97687	2.71817	7.68635	5.27314	7.00112	4.79735	5.42021	8.90213	9.10726	12.5885	3.99927	2.50135	2.581	178	0.989385	-0.597105	-0.192633	0.826715	-1.87108	1.71038
179	8.43576	5.80703	5.53969	5.97343	5.37452	6.53647	3.2395	1.77558	0.281489	5.97636	3.73664	2.53301	3.09936	1.90933	2.49516	4.96981	2.10804	0.785774	5.33501	1.88356	5.0461	3.91748	3.51501	2.61209	2.89861	2.27682	4.84796	5.26509	5.03386	7.22093	2.99652	8.19166	3.64575	5.97271	3.21707	5.77977	8.45513	8.39666	10.4005	5.13843	2.03929	5.03461	179	0.0129876	0.296202	0.585906	1.259	1.1817	-0.720882
180	7.3614	5.32863	5.76815	6.90343	5.70853	6.89512	3.29731	3.48495	1.00745	7.35515	5.18465	2.65939	3.1017	1.7161	3.13776	4.32345	2.60901	1.41951	4.0738	1.81984	4.75105	4.71368	3.39479	3.23434	3.60599	2.0979	2.87522	5.49212	5.24888	6.35832	2.52827	5.64984	6.02032	6.35247	4.5413	6.63034	7.06014	7.08549	9.19208	2.76094	0.0636243	3.41815	180	0.781586	-0.332871	-0.0505406	-0.11793	-0.462955	1.28113
181	7.64695	4.4664	6.67614	6.70076	6.19582	7.96673	1.30805	3.51848	1.85304	3.24515	3.64829	2.90461	2.22619	2.08361	2.64258	3.21024	2.44419	0.647102	3.57564	2.10507	4.92179	5.0656	2.62297	2.42617	3.49145	1.86387	5.25763	5.33592	4.83043	6.66148	2.98727	5.19811	6.38653	6.04738	3.31061	5.58986	9.70813	5.80939	10.8838	4.35563	0.528678	3.9727	181	0.33004	-0.438233	-0.204652	-0.144935	0.859877	-0.888241
182	7.8972	3.40915	6.78462	3.76917	7.79304	7.23424	3.06497	1.78254	0.906492	6.04668	4.86177	1.77656	2.84695	2.87846	3.41049	2.92935	2.86785	0.372727	6.0603	2.0845	5.91945	4.54981	2.45598	2.26698	2.94416	3.68193	4.43646	4.06209	3.81441	6.8456	3.70688	6.0473	5.54414	7.25476	4.21402	5.72132	8.85561	8.63117	8.86136	5.62357	1.48662	1.78167	182	-3.18525	-0.44078	1.77491	-0.179443	0.576261	1.10297
183	7.6161	5.64688	6.05451	6.19268	3.6299	6.84108	2.16743	1.5255	0.93391	6.31901	4.57674	3.95743	3.78932	1.50523	2.35935	5.59339	2.03322	0.259486	5.19849	2.23488	4.66815	2.88878	2.79892	1.22662	2.80531	2.69039	3.45266	3.88472	3.97735	7.56374	2.36019	6.52721	5.28176	6.45827	4.10847	4.1245	9.14297	9.52762	10.2682	6.47865	1.3921	2.78303	183	0.219486	0.240266	2.74235	-1.59798	3.21653	-1.14149
184	6.92079	5.15952	5.85431	6.58992	5.40957	5.29927	2.02984	3.24228	-0.305141	5.54597	3.14107	1.96958	2.204	3.20115	2.26253	3.92302	3.08468	1.59499	5.45191	3.10923	3.96441	4.07287	2.76454	3.1631	1.99519	0.341108	4.61525	4.83416	5.30996	5.62549	1.68968	4.42945	6.8946	6.78667	4.68008	6.13755	9.33085	8.73809	10.9045	3.68123	2.53497	3.36716	184	1.43138	0.852661	-0.254332	2.13642	-0.869392	-1.46922
185	9.01548	5.12276	7.04595	4.21857	5.96615	3.71383	2.86544	2.79597	0.923113	4.98904	3.78039	3.00164	4.09309	2.62127	2.65295	4.66618	3.54327	0.628039	5.73684	1.21513	6.58323	4.74607	3.12283	2.68516	2.2846	0.691498	4.15695	5.19226	5.62827	7.53444	3.04551	7.84448	3.25801	6.37894	2.9619	4.60245	8.06949	6.87712	11.2812	1.45034	2.48129	2.16409	185	0.518768	1.01621	0.647887	1.08125	0.780881	-0.38658
186	8.57701	5.43729	5.91578	7.62428	6.77284	6.27377	1.2278	3.11133	1.22606	7.08185	4.34526	2.47451	3.6154	2.07663	3.61648	3.30841	3.3581	0.42635	3.66338	1.97755	4.30293	5.59007	2.863	4.74651	2.76611	2.21435	3.19483	4.77326	5.80322	6.79762	1.73508	6.16733	5.47037	8.15749	2.84064	3.85559	10.673	8.365	8.21507	6.15313	2.93642	1.91684	186	-1.54153	0.735544	1.08887	-0.542223	-0.178911	-1.45325
187	6.74898	3.24162	5.2728	6.26111	5.81013	6.58662	1.55927	2.55577	1.45753	6.19218	2.52165	2.72536	3.09098	2.1508	3.53647	4.67891	2.12982	0.91541	6.78588	0.538557	4.81674	4.55211	3.41708	1.58464	1.89509	2.63358	2.67888	3.61854	4.54403	7.42456	1.71353	4.99991	4.81841	6.47425	3.02341	3.73869	10.7669	9.60561	7.5301	3.84748	2.27867	3.51095	187	-0.881823	1.4924	1.97365	-1.96798	-2.97218	1.36522
188	9.06425	6.69771	6.66429	5.11928	4.61991	6.54265	2.10938	1.99365	0.55592	6.07497	3.88374	1.6751	4.27685	2.17563	2.91284	3.48619	2.21635	1.12182	3.374	3.7506	4.45608	4.4728	1.64304	3.51112	3.35162	2.21597	4.34478	3.60388	1.80156	6.65482	2.40262	6.63241	4.95529	7.18144	4.04799	3.80684	10.2354	9.25645	10.8623	2.73554	3.71915	2.64556	188	-0.826788	2.42436	1.03371	-1.67054	0.0341254	0.0387598
189	6.44864	6.95212	5.11508	5.45581	3.06937	5.28559	2.74439	1.38472	1.29184	6.41146	4.57403	1.94854	3.44918	2.66057	1.49409	4.08159	3.50001	0.257998	3.69783	0.0903482	5.50653	4.89844	3.60714	1.74463	3.87583	0.684328	4.69787	3.54438	3.97625	6.99802	1.42229	5.88635	4.61743	6.62387	3.1433	4.30063	8.09633	8.37146	11.381	1.74852	2.356	2.82254	189	-1.83425	1.61452	0.909152	1.67891	-0.827122	-0.43265
190	9.20341	5.29904	6.83712	6.43398	4.81889	6.01388	2.66279	3.1517	1.07053	4.54605	4.09716	2.60619	2.9073	2.00716	2.9928	5.7552	2.82135	1.34334	3.17008	1.37297	5.91072	4.41085	1.76155	3.5528	4.27396	1.78095	4.27484	4.72801	2.05264	6.09182	3.26353	5.25474	6.67272	6.37148	3.12391	3.6527	7.06339	3.89208	8.89995	4.98804	2.33804	4.33682	190	-0.416836	2.34268	-0.0800653	0.424825	-1.32378	0.0433467
191	7.1446	6.6564	5.37445	5.81598	5.04243	7.15525	1.80626	1.10798	1.39188	6.75109	2.95856	3.3163	3.47995	1.88259	4.17461	3.55479	4.84444	1.99412	3.28272	3.02311	3.83769	4.45216	3.73711	3.5977	3.01629	1.19262	3.31247	4.88001	4.32292	4.8414	2.13995	5.81395	5.77271	6.61448	2.42137	4.2373	10.4899	7.94208	7.66134	2.9689	1.85961	1.09009	191	-0.480133	2.35601	-1.04937	-1.00205	0.25247	0.0609297
192	8.41915	5.03517	7.07497	5.62897	6.38156	5.82787	3.0076	2.1925	1.1305	6.62177	4.50622	2.61945	2.60419	2.98266	3.63017	3.66105	2.31003	2.11121	4.68414	0.619585	3.23774	5.64827	2.88107	3.24063	2.17269	2.28632	4.96333	2.81153	3.21864	6.53854	1.21778	7.8638	3.74367	7.01001	5.63746	4.50182	9.34778	9.50502	6.43677	4.49974	2.0703	1.23153	192	-0.810832	1.72527	-0.625977	0.110741	0.909021	-1.33898
193	6.67258	4.91491	6.33978	6.13194	4.34785	6.42857	2.73842	2.14079	2.35611	7.48168	3.618	2.08447	2.17278	1.95503	3.58605	4.33574	2.8449	0.383235	6.13626	0.823398	3.29318	4.57191	2.41539	4.10302	2.93326	3.06241	3.25674	3.55674	2.95543	4.99995	3.2188	6.23193	5.79192	6.26794	3.4056	4.24834	6.47737	9.68774	8.74988	2.18753	1.1273	3.35368	193	-0.23648	2.52287	0.0917865	-1.13846	-1.25081	-1.18009
194	8.3536	5.69637	7.45727	5.8017	3.91001	7.15266	1.1958	0.893043	1.0121	7.47978	1.94588	3.19283	1.39	2.83364	3.05196	4.89715	2.94082	0.717249	5.14104	1.29612	3.43196	5.82009	2.68304	3.44554	2.89792	1.14049	4.50139	4.742	3.9814	6.58037	2.39238	5.84293	5.49791	6.74428	4.04165	5.06141	9.00591	9.71107	6.45716	4.19261	0.267411	1.82097	194	-1.95484	3.34558	0.360292	-1.12316	-0.853816	-1.21274
195	9.78847	4.43222	5.90916	6.07678	4.94469	5.26723	2.07304	0.351763	2.68103	5.06722	3.16891	2.62265	3.05208	2.95519	2.49298	3.94082	1.93165	1.17366	4.05758	0.738335	4.46993	4.35322	3.0097	3.78067	2.13796	3.65026	4.24022	3.63092	3.63498	6.05524	1.75658	7.53964	5.17554	6.0182	4.09539	4.91484	8.14131	7.38583	9.60551	3.12948	2.87942	3.40276	195	-0.388653	3.66302	-0.23781	-1.64049	-0.68733	-0.665964
196	8.95692	3.82084	5.61497	4.3279	5.96321	6.61296	1.80828	1.91441	1.93435	6.76479	4.4583	1.43778	4.57274	2.31027	3.0582	4.28116	2.44102	0.739698	3.64007	1.25513	5.73831	4.13645	3.24561	2.40427	4.41263	1.13208	2.13353	3.33376	4.55318	5.6037	1.48536	4.80353	6.9919	6.76355	4.53635	6.8702	10.6813	6.09887	9.7389	2.89404	1.63591	2.22207	196	-1.65443	-0.727493	-0.629773	-0.211634	0.418586	-0.322354
197	8.13432	5.96956	6.41183	5.17042	4.22969	6.54041	2.20154	1.92641	3.10656	5.15233	3.61655	2.39641	3.59815	2.34164	3.51901	4.24955	2.84112	0.326246	2.47773	1.55303	4.42096	4.73349	2.83223	4.41073	3.74072	3.22803	2.78809	4.6042	2.43179	7.566	3.5509	4.42025	5.43569	6.74989	2.74911	5.159	9.20384	8.9534	9.35502	3.77559	2.01803	4.27056	197	-1.7037	-1.13434	-1.60521	-0.922484	0.189828	-0.157321
198	7.89652	6.62447	7.15434	4.57788	4.42546	6.20749	2.81656	2.62962	-1.07001	5.61781	2.78928	3.21258	2.43655	3.42975	3.69702	3.27567	0.583398	1.22098	2.78059	1.50953	4.60421	3.59285	2.94742	3.24333	2.84633	2.84736	3.65897	5.72778	3.63925	6.36783	2.50226	4.3827	4.0531	6.30868	1.17958	4.7309	7.71279	6.94384	7.96389	2.10759	2.17225	2.28967	198	-0.257785	0.577501	1.48914	-0.705781	0.482165	0.525529
199	8.19439	4.9103	5.81668	5.04716	4.21769	5.28975	2.55553	2.60158	1.33064	5.57953	4.52566	2.82047	3.84489	0.579705	2.70534	4.44104	3.59006	1.86737	3.66485	0.303619	6.3376	4.82324	3.43268	3.97409	1.80217	1.64361	3.10695	4.96665	2.88409	6.53125	1.88991	2.0434	6.10202	6.8374	2.56391	4.64969	9.5047	7.1414	9.03582	3.25908	4.55088	3.68174	199	-1.20997	0.470612	-0.750973	-0.556183	0.456954	-0.495938
200	7.87829	5.32905	6.35245	6.61262	5.09231	5.9169	3.19014	2.69859	0.106371	7.21189	4.63987	2.78875	2.11205	1.75655	4.38765	5.44765	2.63175	0.504823	3.33847	2.50467	4.06221	4.8687	3.73558	4.58435	4.30333	3.5394	4.38963	3.84805	5.44904	7.28491	4.02296	5.47783	6.19119	4.92602	1.93505	4.13525	7.35025	6.75873	8.10159	2.35241	2.16908	3.40668	200	-1.91466	-0.70196	1.28007	-0.0852748	1.62831	0.0253959
201	8.88094	5.26989	7.2461	5.73274	3.95854	6.02357	2.1253	2.48841	-0.0133793	6.2142	4.50466	3.01981	3.01249	3.66887	3.87397	4.53564	3.07709	2.17063	5.17405	3.14165	3.62354	3.9276	2.99239	2.96817	3.73533	1.54194	4.2834	4.14166	3.84024	6.84255	3.16336	7.47452	8.03124	5.98984	3.6314	4.25494	7.60947	6.56884	4.6797	2.02614	2.10443	2.48947	201	-2.32915	0.46959	1.08822	-0.483062	-1.78108	-1.01547
202	7.46612	1.65259	6.41136	5.47476	3.87664	4.31272	1.05233	2.95985	2.30494	5.89996	3.76214	3.9697	3.76287	1.79549	3.86925	4.3195	4.08695	1.42775	2.84657	3.57877	4.19549	5.09533	3.37449	2.29337	2.81624	2.85	3.75998	5.07738	4.08299	6.2071	2.4848	3.61913	4.49202	7.18414	1.89444	4.61235	9.55483	8.17188	8.68481	3.60167	-0.0589217	3.44785	202	-0.155963	0.0642837	-1.1194	-0.617957	0.333062	0.614418
203	9.2831	5.57721	4.88266	4.00261	3.79223	4.21188	1.61814	5.00286	-1.32944	5.7954	2.78952	3.1359	3.30242	0.596461	3.49077	3.6554	3.77182	2.01324	3.32021	1.36888	2.7902	3.69985	2.92945	2.13422	2.69392	3.34936	3.36237	4.55751	2.2147	5.80087	1.47133	5.8527	6.03029	3.60413	2.40671	4.94334	9.25957	7.85537	7.75543	5.5993	1.55896	2.38129	203	-1.79308	0.8733	0.623318	-0.250532	1.97123	-1.3893
204	9.64552	4.07673	5.79832	4.86219	5.54686	5.12733	3.00335	0.863645	-0.302278	6.61334	3.31573	2.50741	2.55654	0.457105	3.06219	2.81916	4.32573	1.02934	4.06811	1.84095	4.17041	3.1079	3.43643	3.05242	2.02691	3.62903	2.54132	3.68171	3.75005	5.39036	2.10174	3.87826	4.68084	5.5163	3.47534	4.77693	8.02296	7.58297	8.88616	3.88955	-1.0237	2.20033	204	-0.679329	0.715991	0.00380843	0.582967	1.08154	0.584809
205	9.38392	4.22641	3.21085	3.05428	3.62655	4.53971	1.88959	2.13855	1.31782	4.355	3.79115	1.88716	2.97864	3.40124	2.92388	2.31501	3.07651	1.59379	2.89219	3.16329	3.88918	5.64664	3.32874	3.33744	3.24348	2.8164	5.20337	3.46261	3.47792	5.21683	1.81174	6.21698	3.94966	3.89822	3.41419	4.77257	8.16708	5.18655	8.43017	4.72114	1.5324	2.45563	205	-2.53936	2.23255	0.887156	-0.225581	2.40755	0.621924
206	7.48156	4.98625	5.7456	3.53871	4.34839	4.31993	2.32939	1.92404	-0.135442	5.39573	3.94123	2.69378	1.26753	2.94973	3.29154	3.81318	3.92287	0.978972	2.40549	-0.0430742	3.58208	3.51146	3.27271	3.90616	2.88304	2.92376	3.7559	2.98118	4.32232	4.44709	1.32953	4.5717	3.54193	6.45812	2.38346	4.39435	7.59108	7.07916	8.18651	2.22802	2.28512	-0.484037	206	-0.522379	2.37505	1.55276	-0.813456	2.60303	0.856795
207	6.99425	4.27567	5.14072	4.69493	4.56192	4.53399	0.53047	2.67203	1.83286	6.10011	3.20836	2.98924	2.76006	1.97822	2.27395	4.29912	2.74217	2.30889	0.238056	2.93033	4.04873	3.45307	3.29568	3.2037	2.68185	1.85704	2.43384	3.29272	3.7574	5.04746	1.19244	2.46155	5.72764	5.94991	3.95403	4.70617	8.41053	6.67132	7.23457	2.82774	2.3298	2.43821	207	-0.890248	3.55174	1.08716	-0.317505	1.48448	0.10701
208	7.10026	4.73191	6.0625	4.27228	3.48254	4.99833	1.98216	2.88022	2.5286	5.09621	3.34708	2.61333	0.673003	1.69478	2.39457	2.34851	2.15647	1.32214	2.46047	-0.414383	6.31234	2.99905	2.38813	4.39306	2.12705	3.02709	3.17925	2.99146	2.66665	6.23783	1.82949	5.05602	6.45445	4.82439	2.98905	4.3346	8.15599	8.06951	7.15752	2.09314	1.12771	0.54014	208	-0.899248	2.2672	1.44426	-1.19721	-0.729841	1.95552
209	7.42714	4.13297	4.89509	3.97226	4.96756	4.90334	2.91771	1.80888	-0.665305	4.13626	3.68832	2.66964	2.64657	4.12901	3.33313	3.07919	2.7113	1.48845	2.43133	2.36873	4.67883	3.84462	2.0145	3.50803	2.12085	1.20493	3.26965	3.49751	2.73185	5.74636	0.664942	3.83067	4.55459	4.91621	2.98196	4.0204	6.88574	5.88952	7.32711	2.91337	0.7783	2.4219	209	-0.0847578	-1.34786	1.05759	-0.984103	-0.898012	1.37792
210	6.51154	3.85991	4.02739	3.49142	3.7693	5.05274	2.0704	1.42388	1.32081	4.16822	2.98435	1.53265	2.99634	2.33516	1.0216	2.09285	1.44196	-0.234085	1.8167	0.444856	4.61553	3.35908	2.83063	4.28291	1.74351	1.24448	2.85116	3.96781	4.64736	4.44108	2.88588	4.21215	5.59545	4.31235	2.61414	3.78321	5.55262	5.56871	5.08254	2.303	0.565148	2.34072	210	-1.88742	-0.960932	0.751257	-1.56519	-0.502474	-0.974634
211	7.46245	3.38803	3.83725	5.45004	3.53656	4.2396	4.0724	1.75253	1.16742	4.41687	2.38872	1.83671	1.50939	2.65948	3.14991	2.51883	2.46092	0.799614	2.97994	1.13288	3.92336	3.57266	2.1295	3.06776	4.08068	3.15108	-0.258302	3.54366	3.59032	4.49587	0.659182	5.76201	4.04009	4.74263	2.77952	2.44941	6.7718	6.00839	7.54743	3.51016	1.74276	2.36851	211	-2.14919	0.221785	2.40422	0.293977	-1.08055	0.362776
212	6.71135	3.84093	4.67494	5.13261	3.58769	3.24052	1.17847	2.08687	-0.368516	4.24583	2.49102	1.59406	2.00699	1.21936	1.57737	2.57452	2.36208	1.14549	2.85675	1.58858	2.14405	3.16736	2.22444	4.28711	2.17795	3.31362	1.65667	3.19286	2.84047	4.9402	1.93036	3.5959	5.09123	4.36907	1.53353	2.63818	7.96289	6.6571	5.99095	1.00865	0.930346	2.50769	212	-2.73065	-0.976761	1.23664	-2.29427	-0.330874	1.11023
213	6.24552	4.897	3.62401	3.02718	2.47429	4.39221	0.769469	0.87014	0.778635	5.28902	2.37397	1.60699	1.9626	3.03725	3.47288	2.12913	1.87469	1.6911	0.990442	2.79185	2.08158	3.70813	2.27861	2.26714	2.67671	2.6028	2.79866	3.26191	0.921898	4.50746	3.66119	2.44414	4.5079	4.65254	1.74725	2.18651	7.00467	4.10114	6.6162	3.45739	3.06987	2.76976	213	-1.79731	0.201884	1.41138	0.520456	0.335177	-1.04023
214	6.92509	4.43101	3.11266	3.44755	4.40001	3.56935	2.05444	1.72703	-0.889986	3.49707	3.0461	1.46017	2.15397	1.60748	1.60323	2.65596	2.18157	0.852022	1.44634	2.26159	1.69115	4.04532	1.54884	3.33155	-0.404202	0.995339	1.17817	3.4813	1.6259	3.68774	1.4008	5.00393	6.35609	3.88898	1.41745	3.04383	5.13203	5.7801	6.16215	-0.0385039	0.729824	2.0627	214	-0.904492	0.306762	0.0457222	-0.299002	0.912317	0.674968
215	7.42763	4.17487	4.05995	3.26496	2.10987	3.06745	1.17003	2.55466	0.725155	5.51782	3.0625	2.76575	2.15847	2.18539	1.95168	2.68811	1.67045	0.461546	2.46538	-1.49662	1.98941	3.6363	2.49697	3.86497	1.88535	3.48179	3.31975	1.62124	1.169	5.42104	2.17212	1.98828	3.7015	2.53928	1.27241	2.21869	6.34374	1.08615	3.08162	3.81902	0.133558	0.910588	215	0.392073	-0.283227	1.28883	0.295757	-0.505918	-2.14723
216	6.94306	2.78497	3.11014	2.97782	2.7056	3.08138	1.30512	1.69608	0.00560332	3.66937	3.98562	1.50417	1.66625	1.02219	2.32064	1.13952	1.27369	0.436541	-1.63287	1.40876	1.604	4.3898	2.73645	3.45631	1.47835	2.81376	2.46573	2.84028	3.2284	4.04513	1.9197	3.15658	5.60475	4.80542	2.16649	2.85384	7.15552	3.84018	0.900667	2.97325	0.0567834	1.12993	216	-2.61507	1.15745	0.860652	0.0100076	-0.16488	1.07481
217	6.77147	3.61424	4.54897	3.47354	1.97948	3.38448	1.84474	0.000142588	0.445604	3.81524	1.53118	1.79243	2.82853	0.899869	1.90139	0.551508	1.41244	0.957042	1.13838	1.76057	2.2901	3.23037	2.62148	3.75999	0.338261	2.29187	1.30712	2.30382	2.67356	4.78086	3.1016	1.49422	5.55514	4.13376	1.53611	3.7521	5.02734	3.73152	3.93784	-0.988931	1.5285	2.89215	217	-1.0903	1.2617	-1.30128	-1.53805	0.239398	-0.290574
218	4.14738	1.49791	4.42479	3.83843	2.99804	2.64094	2.03589	1.38999	-0.304576	3.80216	2.65827	2.56725	0.597648	2.33432	1.67499	0.9209	0.512025	1.95221	0.0200117	0.70732	1.78649	2.52174	1.987	1.5305	2.45838	0.102036	2.4564	2.69153	2.50533	4.77144	1.70435	1.43347	1.23369	4.25015	2.43662	2.74649	6.80139	3.03767	6.47878	4.37062	-0.164718	1.60529	218	-1.42628	2.4313	-0.00734153	-0.207486	0.0290348	-0.945346
219	6.14422	2.91109	3.68148	2.99066	3.26327	4.28982	-1.03492	1.58201	0.393362	5.04799	2.90961	0.481959	1.2146	2.98621	2.19563	2.74573	2.16308	-0.107528	0.817832	-0.609671	1.33897	1.85897	1.90148	2.54078	1.37644	2.49536	2.61208	3.57222	3.16278	4.47057	1.8963	2.90407	3.53642	3.67155	1.03763	2.89279	5.44174	3.39453	3.73801	0.449043	1.09845	1.56487	219	-1.49475	0.861618	0.601322	-0.572873	1.49543	-1.49565
220	5.4347	3.7516	3.28076	0.855503	0.971355	3.08724	1.23467	1.07742	1.68736	4.65166	2.62963	2.09522	0.677722	-0.756864	2.07453	0.470563	1.69186	1.09498	-0.195023	1.30007	2.97214	3.03144	2.23734	1.52967	0.834749	3.54295	1.95372	1.97458	3.14945	4.37555	1.64626	2.80798	1.43206	4.04816	1.1298	3.03257	4.56208	3.45133	4.72379	0.827253	2.7301	2.46636	220	-1.89975	1.9666	0.48614	-0.0281249	0.204329	1.45695
221	5.10461	3.13803	3.04632	0.599571	1.69782	4.05364	0.548471	-0.634811	-0.0275265	1.96703	1.66665	0.348328	1.93773	1.49394	1.96511	2.17686	1.57041	0.660765	2.46996	-0.358362	4.33722	3.41206	0.940066	2.54055	1.39637	1.02289	0.0109064	2.22471	-0.716195	2.83963	3.36023	1.56359	1.98743	3.28288	2.9311	1.28163	2.46278	3.58194	6.21859	1.40184	0.29577	2.15329	221	-0.519337	2.99437	1.78479	-1.60263	0.650442	-1.00486
222	5.55283	1.75334	2.89358	2.52066	2.26002	2.9553	0.879864	1.45604	0.0712272	3.71147	2.73964	2.21704	2.12224	2.31827	0.871379	2.07528	2.52393	-0.561372	1.26631	-2.07184	1.31763	1.94925	2.43342	1.86318	2.49484	2.07304	-0.0747797	1.08991	2.28962	2.33766	-0.149828	4.31079	1.91556	3.15944	1.67412	0.453342	4.11096	4.02461	4.28359	0.0857548	-0.100132	2.77688	222	0.0318062	2.49213	-0.362446	0.0546911	-0.083438	1.33726
223	5.78059	3.69281	4.72459	1.83887	3.88915	4.27507	1.69514	1.18819	-0.109801	3.73601	2.41605	1.50851	1.38679	2.00786	1.1447	2.94704	0.89991	1.52989	1.02659	-0.520808	3.13455	2.25477	1.8893	2.91307	2.14027	2.31992	4.02513	1.9238	0.0126136	3.70657	3.13966	3.95683	0.0312484	2.24369	0.463649	1.26865	4.2392	3.99543	4.45811	0.148621	2.58775	2.92461	223	-0.301474	1.18882	-1.43038	-0.200938	1.80144	2.37967
224	4.74265	2.7756	3.31986	2.75935	1.27921	3.0071	0.791253	1.44907	-0.691056	3.64126	2.31082	1.40688	1.11582	-0.0156295	1.84624	-0.0652786	1.14595	0.113133	-0.0361021	0.529324	2.47242	1.90013	2.19779	2.51415	0.798587	2.94821	3.37283	1.24964	0.948077	2.89749	1.23055	4.06348	1.28725	3.02124	1.10315	1.15927	5.05567	3.95717	5.72949	1.96239	-0.183115	3.18461	224	-2.11477	1.79343	0.0786473	-0.00340203	0.665572	0.454081
225	4.388	1.29579	3.58536	2.77073	3.2511	2.56992	-0.765289	0.513621	0.57777	1.84226	0.2836	3.75563	1.15641	-0.34082	0.011823	1.19964	3.47445	0.6307	-0.596362	0.789929	3.75317	2.64228	1.40017	0.889649	2.30003	3.47583	0.284026	2.07131	2.1851	2.09274	0.544444	2.28083	4.15113	2.07017	0.956929	0.802977	3.82109	4.30389	4.73469	1.36607	1.03098	2.3348	225	-2.02262	2.05888	-0.494911	0.825787	0.927074	0.253818
226	5.44497	3.98794	2.65246	1.86463	2.00732	3.40022	0.788447	1.07302	0.807574	3.55812	3.23728	2.42168	0.132117	0.0718235	0.694044	0.451443	0.766965	1.23387	-0.408565	1.55789	3.98079	2.79518	1.61945	2.5793	0.812206	2.91968	2.65179	2.5575	2.36434	3.62122	2.27593	-0.0735487	0.728495	2.00288	2.029	0.888845	4.93931	3.50174	5.80032	0.74566	-0.760769	-1.17678	226	-0.359275	1.55692	-1.67798	0.59236	-0.0851535	2.23023
227	4.65529	1.18888	2.50121	2.69399	2.04234	3.14555	1.33687	1.07153	-0.156194	1.93085	1.55824	2.15047	0.209662	2.82568	1.35022	0.235313	0.3537	0.89175	-1.61714	1.08387	0.433997	2.90912	1.46187	2.93215	1.76233	2.19446	0.831208	1.49795	-0.784204	1.79389	0.300746	1.51434	0.883539	2.41855	0.629698	2.24604	2.07493	5.70827	5.5841	-0.391621	1.27622	0.705503	227	-0.294367	1.99765	0.900483	0.719927	0.465239	1.212
228	3.76334	3.48169	3.65282	2.63482	1.46072	3.43314	-0.166446	0.96775	-0.907417	2.90538	1.5597	1.80988	-0.45916	0.559925	-0.116133	1.84362	1.45948	-0.247315	0.523903	-1.7253	2.67221	2.29653	1.64552	3.47811	0.146277	0.692767	1.07109	1.99016	1.36248	3.22071	0.994928	4.59988	0.356408	1.05664	0.409926	2.02711	3.70658	3.01772	2.66141	1.83439	0.595092	3.02098	228	-1.03141	2.81581	-1.63107	0.634245	0.126978	0.593552
229	4.14359	0.784371	0.728081	2.75602	3.21826	2.05595	1.01901	1.37252	-0.0133265	1.68449	0.977498	0.885751	2.00944	1.57971	1.15373	1.59269	0.753318	1.46853	1.11596	0.952358	2.39307	0.382593	1.40431	3.29829	1.7728	0.533962	0.0975877	1.05195	0.526825	2.73184	-1.104	1.60146	4.29208	2.33723	-0.195071	2.31322	3.15782	1.08567	3.09636	0.405298	0.0167731	3.89766	229	-1.19851	-0.971233	0.792029	-0.8034	1.25818	0.825657
230	0.409042	2.6762	3.17956	1.63816	1.34256	1.75002	0.328957	-0.14679	0.371389	0.364451	2.05507	1.58456	1.14774	-1.04317	1.51723	-0.117931	2.44317	1.29102	0.252033	-3.00504	2.18796	1.35155	2.00031	3.41039	-0.70446	2.66053	1.44374	1.57376	1.60143	3.32825	3.06826	1.02895	3.88036	1.79285	0.0756775	2.3466	3.26887	5.45446	4.67111	0.714873	0.332341	1.06372	230	-0.316495	-1.01254	0.911367	0.376619	0.582095	0.708081
231	3.84742	2.01802	3.06187	2.03958	1.62321	1.52777	2.00931	1.30201	0.0691405	3.49686	1.06101	0.432087	0.78217	2.03395	-0.291832	1.85359	1.85168	1.15965	-2.04664	2.52684	0.62079	2.9884	1.84118	3.37465	0.235143	2.87462	0.554348	0.60692	1.28798	1.27132	0.27041	1.05896	4.71706	1.08841	1.54921	1.99207	2.16263	4.44415	4.44185	-0.627132	0.294105	3.45218	231	-0.267663	-1.86449	0.549459	-1.78722	0.887836	1.1567
232	3.94297	0.992939	3.01678	-1.6861	1.33545	2.89345	0.248059	-0.302803	-0.877314	2.64862	1.86618	0.574392	-0.798539	1.42949	0.304589	-1.02354	1.01674	-0.238296	0.384531	-1.66433	2.04586	2.67088	0.693236	3.22221	1.21812	-0.583629	1.81303	1.51436	1.776	3.21251	3.14665	3.01609	1.43015	0.174144	0.750308	2.04991	1.15573	4.56505	4.36778	2.08028	1.24513	1.97686	232	0.177768	-0.960181	-0.921997	0.286292	-0.389669	0.475847
233	4.10073	-0.359878	1.54955	0.960972	0.88149	1.52758	0.332385	0.651149	1.00612	1.60859	1.61473	1.9027	1.29684	1.45943	0.868507	0.829164	1.28895	1.42574	1.54156	0.985028	1.97761	1.71956	0.851053	1.26906	0.105132	1.75191	2.87982	0.950064	0.944913	2.35255	-1.84812	2.39342	3.13805	4.0229	1.05696	1.1986	2.95802	5.02842	3.98313	0.842148	-0.827997	0.89038	233	0.127607	-1.80645	0.645226	0.999198	0.136003	1.67186
234	4.00133	4.64603	2.08065	1.61356	0.899468	1.57248	1.12483	1.24723	1.32477	2.42217	3.14633	1.73724	-0.28786	1.21231	0.857367	1.03807	1.48699	0.0882397	-1.36988	0.649506	2.01142	2.04666	0.690217	2.0958	0.955594	2.47819	1.57642	1.9492	1.12285	2.67996	0.601664	1.12943	0.441927	3.36958	1.98967	2.62003	1.58412	3.24312	2.63792	1.50286	1.24744	2.34103	234	0.367968	1.05313	1.28237	0.408152	-0.0823556	-0.964904
235	0.671722	1.36673	2.76386	0.536864	0.454028	1.59743	0.211082	0.356297	-0.0270499	2.86506	-0.606597	-0.208089	1.13954	1.44679	-0.352917	0.599358	1.00945	0.396268	-1.63581	1.7575	1.16255	1.34746	1.38436	0.831729	0.747473	-0.0920434	2.06364	1.23955	1.55061	3.83975	1.84707	2.72683	3.00246	2.61288	0.0912355	2.26771	3.39085	4.89214	3.71993	1.97593	1.89697	1.68804	235	0.627454	0.888988	-0.71341	1.14235	0.269855	2.53019
236	4.10071	1.65423	1.6874	0.904426	1.46544	1.44486	0.966293	1.10409	1.53523	1.57917	1.04296	0.746944	0.0986852	1.66348	1.46207	0.74823	1.89006	-0.0889786	-1.3339	-0.576752	1.07169	0.771143	-0.107201	1.29129	0.210698	2.09109	2.39056	0.460668	-0.125966	1.77276	2.05928	2.43911	2.5479	1.3669	0.915689	0.824398	0.95616	3.78243	2.64262	-0.382092	1.44815	-0.192258	236	-3.64896	0.840448	-0.106892	-0.176708	-0.455899	0.0660061
237	1.51271	3.39611	2.533	0.810517	1.21557	2.46005	1.58744	0.338556	0.994869	1.08023	1.38299	0.912833	0.559166	-0.699389	1.62015	1.35134	0.859328	0.588599	-2.08747	-2.5907	1.85805	1.73241	1.59312	2.22879	1.09998	-0.728577	3.32676	0.854276	1.12426	2.06525	0.681926	1.7973	3.76389	1.59606	0.459538	1.6693	2.26429	4.68341	3.84119	4.11096	1.46036	2.53916	237	-1.75827	0.270571	-0.412073	-0.278623	0.462622	-0.163644
238	3.95221	-0.0452321	1.67281	1.42322	0.657705	2.1411	1.69642	1.62665	-0.481227	0.847455	0.966615	2.18889	1.10836	1.51735	1.14889	1.19159	0.682394	-0.480491	-2.4177	0.689638	2.02221	1.67465	0.57722	1.88968	0.663134	2.44483	0.780508	1.78718	0.243618	2.06413	-1.15246	3.14006	-0.237363	2.77293	-0.872035	1.82199	2.39789	2.7276	3.44873	0.966255	0.697796	-0.528048	238	-2.5453	-0.00455914	0.940932	-0.121509	1.25213	0.849989
239	3.01786	1.34883	2.16408	-0.000382143	0.841367	3.75676	-0.719385	0.292886	0.2225	1.09902	0.397568	1.39644	1.97956	1.1593	1.83287	1.66192	0.761875	1.9107	-0.522864	0.527446	1.15481	0.466748	0.671917	1.14874	-0.332296	2.89697	1.84791	1.65899	1.43492	1.92602	2.28024	0.866797	-0.772104	1.99581	-0.0844066	1.02911	2.53633	2.69492	1.6035	1.47394	-1.14199	-0.805091	239	-0.86189	0.195329	-0.937503	-0.186138	-0.659017	-1.00908
240	2.90708	1.79076	0.837178	0.375626	0.731342	3.16735	0.792824	1.8483	-0.18075	1.80302	1.37647	0.417343	0.624009	1.31979	0.292506	1.61823	0.169963	0.247328	-1.01181	0.100878	0.927867	1.12851	1.23034	1.85059	0.120198	1.25584	1.97379	1.27235	1.37915	1.5253	0.93521	0.544829	3.17175	2.24418	0.808831	1.46995	3.06802	-0.0233943	4.69982	3.16348	-0.0637936	-0.267346	240	-1.62252	1.65675	-0.111518	-0.419434	0.694341	-1.51013
241	3.18873	1.84595	1.42775	2.11135	1.88363	0.453679	-0.23225	-0.329602	0.38409	2.33238	0.83929	1.02887	0.386969	1.55856	0.900552	0.799257	0.777961	0.020621	1.10887	1.16347	1.00346	0.538385	1.38539	1.71525	0.952981	1.22056	0.468419	0.5846	1.05861	2.68871	1.98065	0.901982	2.51929	2.23343	0.436608	0.732466	2.17993	3.0603	4.85968	0.907782	1.50047	1.64237	241	-2.61411	1.35963	0.431818	0.628209	0.465767	0.691492
242	2.24159	2.52063	1.40488	0.613711	2.31742	0.331432	1.22413	1.43466	-3.79239	1.51157	0.565857	1.2779	1.2949	1.51302	0.780682	0.934607	1.08709	0.525729	0.505911	0.230039	1.29616	1.43602	0.903847	0.650111	1.76155	0.679273	-0.249804	-0.215967	-1.4275	1.93087	-1.02314	1.19774	0.678571	0.798836	-0.12785	1.96249	2.35019	3.4428	2.26432	-0.400386	2.43836	3.22368	242	-1.55813	1.79289	0.340661	-0.616507	0.809999	2.38658
243	2.23537	2.58383	0.930408	2.75584	1.12944	1.56148	-0.64675	0.818147	1.64506	-0.0981895	1.04329	-0.487868	0.279255	1.01931	0.568994	0.870174	1.37946	0.112071	-2.80231	1.14162	1.62435	0.734537	2.00541	0.320956	-0.144607	1.10679	1.30468	0.83915	0.146258	1.9033	0.795665	2.25142	2.53901	0.753547	-0.0676605	1.70026	2.93603	2.37397	3.70612	1.95787	0.889944	1.00794	243	-1.89866	0.876785	-0.327969	-0.717234	-0.238859	0.909451
244	1.98505	-1.31012	0.801756	0.87509	1.55193	0.992411	-0.0260368	1.23429	-1.3772	1.7528	0.442284	1.52541	-0.502067	0.237998	0.870029	1.03222	1.85904	1.11573	0.595579	2.65521	2.79317	0.25874	1.34178	2.51876	1.9455	-0.0177996	-1.23306	1.15113	0.837111	2.08069	0.153812	2.26936	0.0955938	2.26207	0.88529	0.800996	2.64592	2.04387	2.41476	2.48729	-0.370061	3.47268	244	-1.06439	0.910653	0.259319	0.916962	-1.77792	1.34183
245	2.9625	2.13279	1.52575	0.279632	1.0444	1.40233	0.534356	1.37836	0.365858	-0.0807233	0.650653	1.67197	0.725818	1.38855	1.41256	2.01332	0.919604	-0.461213	-0.709793	0.965027	1.0112	0.908271	2.07621	2.19778	-0.172055	1.72952	0.0563888	1.03354	1.51216	3.17561	0.585789	1.17846	-0.0188345	-0.69685	1.05731	0.872179	0.795399	3.01821	1.11647	0.503121	0.0321807	1.97448	245	-1.55461	0.962875	1.80307	-0.699268	-1.10817	0.904606
246	3.22581	2.21983	0.726867	1.19271	2.58177	0.207947	0.659674	0.103035	-0.188432	1.35846	2.37071	1.16147	0.961645	1.89847	0.56433	1.30184	1.38324	1.14034	-2.54994	-0.301492	0.807096	1.53819	-0.572258	1.88522	0.748804	1.61911	0.25628	1.71921	1.26129	1.60714	0.986599	4.77351	1.13307	1.28354	0.443027	0.308699	1.13053	2.29394	2.8705	2.13398	-0.152535	1.38875	246	-1.82864	0.793999	1.67277	-2.38544	1.57113	-0.534906
247	2.14867	2.96707	1.7279	2.11192	0.656956	3.23665	-1.96574	-0.34897	0.787925	-0.45688	1.17293	0.971339	-0.980616	-1.10623	1.8452	0.872957	-0.484921	-0.280944	-0.91378	0.92209	2.74763	1.87482	-0.0760166	2.42022	-0.958103	1.42118	0.249848	1.27362	1.01199	1.96206	0.040901	-1.20328	1.77901	1.89853	0.587687	0.0414395	2.93327	3.58604	3.20433	1.31516	-0.363806	4.00146	247	1.83447	1.197	0.832527	-0.985112	0.0547173	1.45246
248	1.96714	0.083986	1.0931	1.02221	1.28106	2.24583	0.281816	0.6865	1.8748	0.827023	0.668271	1.57289	0.330754	1.9897	1.29864	1.62216	1.09583	0.315786	-0.193201	0.24488	3.85644	0.880171	0.424445	1.8602	2.66174	-0.570991	0.738167	0.793784	-0.213096	1.34888	0.368165	1.88918	2.07231	1.15807	1.89316	0.462566	0.7982	3.94077	4.21352	1.182	-0.738821	2.9512	248	-1.97464	1.84425	1.07192	0.598621	1.14201	1.58773
249	2.6476	-0.581943	1.18225	0.54011	0.89437	1.74419	-0.368679	1.40717	1.32242	-0.156706	1.28975	-0.68779	0.288726	1.25881	1.23343	0.199338	0.531939	1.14616	-1.53568	-0.340815	1.26626	0.833865	2.14388	1.99111	0.767856	0.640199	1.19639	-0.573044	1.17593	1.45916	0.898209	2.14209	1.99826	-0.0840913	0.71923	0.133848	2.14717	1.14188	3.57071	-0.645158	0.0692278	1.47573	249	-1.37585	1.04873	1.41645	-0.021059	1.01978	0.52797
250	1.8273	0.529192	2.11169	1.35103	0.811093	1.62575	-1.10311	-0.337234	-2.63183	1.89842	0.574731	1.05298	0.0414798	0.946206	1.55523	0.771671	1.22285	0.00928762	0.897453	-1.8777	1.61352	0.491272	-0.30789	0.407439	2.74429	1.62593	4.07874	-0.0351723	1.49435	1.54126	-0.691003	2.91957	1.92897	-0.283987	1.19297	0.434328	0.842117	4.11411	3.28468	0.997066	1.29162	1.41122	250	-2.24472	-4.46769	1.19399	0.147399	-0.723825	0.591248
251	1.44168	2.55812	2.10991	0.29352	1.22001	3.41138	1.13789	2.01167	-1.48401	0.050333	-0.186072	1.58097	-0.807023	2.23721	0.0419762	0.054899	1.29412	0.559744	-1.40634	-0.398711	-0.426375	0.700374	1.1805	2.75586	0.929634	0.503639	1.78472	0.22177	1.24507	2.47233	0.00707922	0.721092	1.72321	0.616162	0.356806	0.251114	1.50743	1.39509	3.38606	-0.47707	1.42776	0.35655	251	-0.644974	1.3893	1.41345	0.90798	-0.921558	-2.08951
252	2.34873	0.989084	0.724562	1.77826	1.05618	1.78437	0.341002	0.76886	-0.190951	0.687605	-0.363159	1.34672	-0.768473	0.977804	0.475685	0.695316	0.552801	0.383601	0.81842	0.884951	0.470248	1.15349	0.281802	1.10304	1.05384	2.50664	-0.00715735	1.05564	-1.23601	2.416	-0.554113	1.457	-0.498418	2.71289	0.615325	0.0344259	2.09072	3.74233	3.63235	2.00563	1.61586	1.62448	252	-1.90657	-0.882092	2.58633	-0.131174	-0.336952	0.189535
253	2.29341	2.28983	0.901558	-0.0663283	0.944554	1.34391	-0.122301	1.65144	-0.232354	1.46216	1.66569	1.59047	0.0246116	1.38757	0.598354	-0.420926	0.687768	0.502776	-0.859043	0.0920857	1.82748	0.176793	1.13705	1.0565	1.37729	1.24997	0.695036	-0.53833	0.798095	1.83717	-0.137215	1.38463	2.48503	0.579046	0.156878	0.582965	1.92136	2.72962	2.49996	1.10078	-0.23455	-0.0684336	253	-0.630847	0.468635	2.25793	-1.13673	1.10827	-0.866281
254	2.53633	1.74702	2.72311	1.63782	0.301669	0.70062	-0.464417	0.658235	0.666269	0.52178	-0.660281	2.4801	0.489908	0.717818	0.397849	1.59891	0.706382	-0.804751	0.0977742	-1.43469	0.0585226	0.797706	1.14225	1.38522	0.593904	-0.883883	1.83905	0.987234	1.10949	1.54818	-0.79698	1.71335	1.75479	1.67585	-0.474817	1.37684	1.54452	1.74777	2.64688	-1.04327	0.131404	0.0971952	254	-0.883999	-1.66459	-0.795538	-0.936449	-0.132054	0.408139
255	2.10079	1.61494	1.95627	1.1174	1.07587	0.970171	0.447406	1.3499	0.321551	2.40562	-0.839041	0.0707254	0.633864	0.622493	-1.05341	1.26579	0.361749	1.33107	-0.596494	1.11014	0.501312	0.299551	-0.321254	1.82421	-0.0684254	1.23293	1.58556	0.331109	-1.30722	2.34164	-0.263108	1.69408	2.29164	-0.170302	0.228229	0.8618	1.68921	3.61385	1.93965	-0.234212	0.629961	2.96594	255	-0.962153	0.567435	1.13401	-0.999605	1.80952	1.05491
256	2.89268	0.358695	2.62183	1.37927	0.622949	2.16337	0.666387	1.43098	-0.592803	0.690024	0.0428444	2.47534	-0.755773	0.832563	-0.037847	0.364986	1.57355	1.72526	1.51768	0.545768	1.9286	-0.46652	-0.951505	1.52012	0.376062	2.40226	1.86958	-0.563048	0.816821	1.40473	-1.92791	1.92051	0.673645	-0.808225	0.122026	0.966651	1.83072	1.27334	2.62231	1.23651	-0.931156	-0.101172	256	-1.0851	-1.34444	1.21823	2.18132	-0.577149	-0.508965
257	1.51916	2.73532	0.372088	-2.45061	1.04386	1.43505	-0.776369	1.4648	0.191748	0.22915	1.6646	2.24386	0.335977	0.624586	0.52453	0.262351	1.11056	0.624197	-0.370777	1.60622	1.54089	1.36748	1.59406	2.98605	-0.103117	-1.46265	0.924134	-0.838207	-1.0587	1.60425	-0.669174	3.48721	-0.0693021	0.567133	0.69412	1.23624	0.484013	3.45381	3.94521	2.05414	-1.24971	3.09177	257	-0.311772	0.0958973	1.29277	-1.10215	0.549387	0.612919
258	2.02663	1.04158	1.33523	1.77458	0.100959	0.612794	-0.388346	-0.289355	-0.893676	1.01526	0.130099	1.64737	0.290801	1.61372	-0.146912	-0.264983	0.844289	-0.16928	-2.51223	0.39468	-0.520391	0.28906	1.24129	1.2615	-1.32215	1.34968	1.3599	-0.113231	-1.81635	1.86829	-0.320982	2.23074	-0.237933	1.0177	-0.968173	0.797796	0.459751	3.59365	3.59922	1.79341	0.974827	2.94803	258	-1.55012	0.711022	1.01805	-0.773207	2.3248	-0.319982
259	2.39658	1.12906	1.10692	1.74293	1.12417	2.61482	-0.873326	2.24732	-0.893134	0.745436	-1.0183	-0.765203	-0.437615	1.26822	0.720501	1.36194	0.752953	-0.334462	-0.12178	1.52046	0.0698919	0.73126	0.276243	0.963703	1.5475	0.812941	1.13995	-0.272536	0.579397	1.05559	-1.04657	-0.00378412	1.5536	0.758709	-0.47058	-0.718981	1.78374	1.78862	2.60929	-0.0453527	1.2069	2.49923	259	-0.538739	0.695936	-0.568849	1.0672	0.855421	-0.611377
260	2.0102	1.50734	1.90835	-1.35437	0.707889	1.9935	0.398266	0.229912	0.22123	0.700727	0.157065	-0.189457	-0.0867212	1.47615	0.0299124	0.924743	1.14591	-0.803863	-2.0642	-2.10402	-1.0143	0.700935	0.204665	1.06167	0.512276	2.3057	-0.305185	-1.30418	-1.56823	0.981396	-1.26375	2.44151	1.53466	0.461055	-1.46115	0.637567	1.02216	3.25498	2.0201	1.96917	1.50075	2.76159	260	-0.622994	0.899819	-0.164553	1.01231	0.227111	1.24859
261	1.6264	0.937938	2.81264	0.843425	1.13433	1.73904	0.626877	1.11563	1.09642	1.387	0.351785	2.1974	-0.525409	0.276229	1.0438	0.750986	0.575589	0.262897	-1.90691	1.49464	1.05753	1.23067	0.624262	0.517443	-0.303846	-1.53567	1.18005	0.676373	-0.921946	1.64269	-0.0519879	1.69576	4.29409	0.691809	-0.602612	1.67988	1.96564	2.99268	3.38961	-3.06507	0.813471	1.76134	261	-0.369326	0.184805	-0.360698	1.50056	-0.604979	0.0476352
262	1.04431	-0.788049	2.05976	1.61228	1.37624	1.36103	0.634122	0.371547	0.0572903	1.17347	0.418322	0.570511	-7.11061	2.08194	0.0519573	1.8137	0.629669	-0.511578	-2.60564	-3.6069	0.800212	-0.482591	-0.459749	1.37423	0.488398	1.87087	0.0101929	-0.460106	-0.10588	2.16823	-0.278405	1.10405	0.167967	-1.27694	-1.03815	0.44694	0.070924	2.12804	2.27728	0.48967	0.565014	0.365304	262	-0.910989	1.57745	-1.39431	0.297061	0.93525	0.389172
263	0.325881	1.18233	1.96289	-1.16491	0.458178	0.379328	-0.628237	-1.59535	-0.526825	1.22594	0.620128	-0.643665	-1.58179	1.32759	1.23518	-0.0841355	1.88587	-0.335216	-1.82646	1.04796	1.18615	1.58935	0.383791	0.250276	0.211189	0.999829	0.780354	-0.476891	0.332345	1.23063	-0.0344191	1.63716	-0.391097	1.736	-1.39432	1.2273	2.21741	3.16104	3.89112	2.09843	1.4626	2.01343	263	-0.268059	2.38649	-0.803524	-0.463331	-0.224972	1.66978
264	1.51315	0.449322	1.61009	0.0580935	1.05393	0.0900801	0.0908742	0.498401	-0.765271	0.213339	1.2631	0.147724	-0.546421	0.262264	1.02364	0.804743	-0.751221	-0.898724	-1.79379	-0.0475751	2.65008	0.303438	-0.512672	0.810013	1.07384	2.608	-0.0824759	-0.322729	0.23358	-0.0698046	0.220328	-0.796788	4.22918	0.900209	-0.157981	-0.165275	1.45751	1.39968	2.39087	-3.36626	0.788867	1.83358	264	-0.766299	2.24028	-0.31503	1.87045	-0.150485	0.981588
265	1.48998	0.501596	2.42624	0.431958	1.81465	0.218242	0.476682	0.435672	-0.817206	2.02646	0.587989	1.21853	-0.443121	1.24939	0.693742	0.10036	0.697838	-0.209327	-1.95752	1.49861	1.18557	2.16253	-0.0939614	1.17958	0.257237	0.132128	-0.527449	1.49988	0.699101	1.80818	0.555321	-1.7801	1.59921	-1.97297	-0.439131	0.379514	2.58386	2.82378	3.77995	-2.86399	0.962911	1.7409	265	-0.407854	1.04376	-1.3258	2.19347	2.19451	2.16492
266	0.27953	-0.387752	1.15005	2.28608	1.10528	1.90831	0.342631	-0.654894	0.89615	0.889489	0.898998	-0.0299302	-1.2523	1.08324	1.6963	1.35485	0.176775	0.245101	-1.03615	1.4819	1.47697	1.19949	0.510513	2.22887	0.628935	-0.840597	0.622781	0.421836	0.581951	2.13548	-0.691946	1.63121	0.394843	-1.81291	0.621565	1.30093	-0.0821535	1.67611	2.92888	-0.48716	1.23092	-0.46952	266	0.599251	1.50088	-0.658118	0.647737	0.116636	1.29073
267	0.431089	0.000635704	-0.16492	0.820064	0.542335	-0.300866	-1.05863	0.375954	-0.023223	1.23819	0.326685	0.500027	-0.130413	0.851599	0.548421	1.90348	-0.624659	0.713709	-2.37855	0.0335214	1.03304	-0.0203758	1.48989	2.81376	0.634077	-0.137364	0.647885	-0.0833898	0.148495	0.815866	1.21413	0.734753	-0.167858	0.682267	0.676317	1.76354	3.60953	2.51659	3.9958	0.190893	1.6082	2.42868	267	-0.199011	3.29387	-0.691734	0.623069	1.10303	1.7598
268	1.88143	1.64103	1.19856	0.563671	-0.17564	0.601161	-0.728777	-0.623744	-2.13517	-0.806219	-0.399171	-0.529848	-0.529343	1.67576	0.946057	0.550775	0.779402	-0.673712	-1.58573	0.840698	-0.824476	0.501011	-0.11156	2.1753	0.480463	2.69962	-0.245498	0.188314	-1.51949	3.55068	0.765774	-0.0925606	0.872808	0.0172013	0.297295	1.15931	2.66197	2.78315	3.96848	-0.978465	-2.19236	-1.6036	268	-0.123364	-2.42866	1.60709	1.35422	0.925544	-0.328695
269	1.54642	0.99481	0.258165	-0.999936	0.293454	2.39641	-0.787435	-0.935721	-2.32151	0.175291	2.45074	1.15493	-0.509754	0.629535	0.698578	-0.38122	1.51119	1.49192	-0.828706	-0.373021	0.814875	0.0611695	-0.270403	1.3664	1.26209	0.896131	1.77733	-0.276749	-1.71559	1.64258	0.884877	2.30157	2.08101	-0.929096	-0.817128	1.97954	1.67044	2.57721	2.77237	-0.550671	-0.387092	0.319526	269	0.345544	-0.60961	-0.198155	0.950571	-0.113242	0.719193
270	0.780296	0.159476	0.542866	1.21729	1.77953	0.697122	0.252714	0.757967	-0.839824	1.19817	-0.808707	0.88972	0.369004	1.29856	1.22594	0.986825	0.913249	0.899489	-0.807202	-0.129013	1.95447	0.600011	-1.2963	2.06271	0.00873418	1.40895	1.74245	-0.59423	0.413254	2.81813	1.43356	2.37924	2.25542	0.405375	-0.474956	1.02775	1.45275	2.33442	4.47548	1.15283	-0.474196	2.50832	270	-0.738521	0.0942012	0.763084	1.53412	-0.452448	0.980468
271	1.20816	-0.522978	1.20933	-0.446107	1.20343	0.815966	-0.0719572	-0.799833	-0.711978	-1.03434	1.09629	-0.219989	-0.154882	1.77816	1.03027	0.197105	0.955552	1.43457	-2.88867	0.60763	0.175373	0.754828	0.162845	0.958424	0.469215	-1.11694	-0.588161	-0.515371	-0.466118	1.07171	-0.732486	2.38581	0.528018	-0.753117	-1.10448	-0.00331892	-0.871375	3.58345	3.41424	-1.43204	-0.684206	1.07612	271	0.238793	-2.00335	-0.3057	0.185845	-0.197853	-1.32213
272	1.07294	0.453807	0.170715	1.31354	-0.998454	1.36988	0.198138	-0.0108982	-0.792329	-0.633037	-0.915595	0.228039	-1.16654	0.160056	-0.622426	0.661193	0.660987	0.902294	-0.875815	-0.893517	0.345508	-0.225216	1.00488	1.11776	-0.937746	1.21291	0.89041	0.564019	-2.4025	2.35722	-0.931149	2.63109	0.0797054	-0.0468161	-0.535029	0.590171	2.44655	3.03106	3.51129	-3.6015	0.555935	0.356788	272	-1.13993	-0.861918	-0.677491	0.93245	0.10176	0.0818632
273	2.10843	2.16251	0.886332	1.51336	1.57169	0.121077	0.350561	0.00194669	-0.925215	0.373052	-0.192515	1.78079	-0.831946	-0.453279	-0.00315123	0.40607	1.06141	0.283684	0.576855	1.16637	2.19953	1.23303	1.23523	2.24571	1.71129	-0.97032	-0.831925	-1.34784	-0.482494	1.33823	-0.0953281	1.38325	-0.0365771	0.98025	-0.615129	1.49111	1.97968	1.35387	2.9873	0.199583	-1.20309	2.03871	273	-0.741939	-0.0315706	0.0993739	0.833091	-0.872167	1.16569
274	-0.60967	-1.06872	0.319698	0.990789	0.670224	1.79824	0.133778	-2.141	-1.14762	0.656009	0.707647	0.749232	-0.33961	1.2101	0.0789984	0.31649	1.13869	-0.161077	0.200817	2.48892	1.88793	0.296903	0.370825	1.69315	0.189678	0.723249	1.44245	-0.997377	-2.14784	2.38946	0.25541	0.704833	1.55184	-0.343338	-0.943202	1.03541	1.72317	1.67733	-2.09068	0.92599	-0.318853	0.982029	274	-1.81426	-1.0003	-0.219671	-0.848578	-0.311709	0.845444
275	1.10286	1.32043	0.00122264	0.871711	0.365913	0.243728	0.286903	0.248301	-1.48265	-1.21029	-0.123955	-0.408031	0.209956	-0.407847	0.566957	0.593343	0.875345	-0.254368	0.579883	0.0779902	1.31718	0.237674	0.602676	0.202498	0.769968	0.742714	0.201928	-1.11549	-0.147176	1.04181	-2.31523	2.09279	0.426361	-0.60463	-1.01632	1.70877	1.2364	2.1836	3.02159	2.07358	0.762234	1.4365	275	-0.363478	-0.240489	1.52427	1.72368	-1.30291	0.632238
276	2.24155	0.725048	1.41952	-1.26124	0.372077	0.966683	-0.408582	0.807345	-0.745624	1.08664	0.00716723	1.30511	0.0281625	1.42982	-1.10375	0.19673	0.411912	0.376253	-0.796434	0.627893	2.99799	1.5767	0.36625	1.68406	0.403534	1.85453	0.273806	-0.730582	-0.229161	3.39703	-1.05672	-0.580595	1.64071	0.570158	0.336192	0.278968	1.29635	2.88678	1.37979	-0.566134	0.167026	-0.191824	276	0.0177406	0.563777	0.899088	0.0128698	-0.0627869	1.23301
277	0.248775	0.801961	1.32638	-0.83006	0.650697	1.69962	-1.83239	-1.80905	-0.88913	-0.0162457	2.04381	-1.20861	0.112237	1.59689	0.580207	-0.87965	0.162978	0.00775966	-2.50533	0.0417777	2.04431	0.69411	0.764957	1.34582	-0.375534	-0.960265	-1.73464	-0.598373	-0.238463	0.575133	-2.23093	-0.0856319	-0.081753	-2.17998	-0.121802	0.670275	0.30738	2.48591	3.21652	1.28722	1.7904	0.0297922	277	-0.892833	1.19288	1.06209	1.27082	0.666826	0.85436
278	0.0598964	1.19313	2.34791	-0.292413	0.283177	0.827771	1.23802	-0.095518	-0.581302	-0.286094	2.0032	-0.39725	0.079742	1.17788	-0.420566	0.321796	0.526438	0.553922	-3.04292	0.611245	1.64051	0.0899728	0.353582	0.860362	0.763995	1.44892	2.10106	0.176777	-1.37178	1.32383	0.231827	1.38193	0.229284	-1.08975	-0.278799	0.165027	-1.20842	-0.732093	2.45942	-0.312131	-1.5151	-0.214932	278	-0.209309	0.397536	0.0717461	-0.0517878	1.25683	-0.652207
279	1.85162	-0.0766763	0.917042	-0.543548	1.48768	1.81521	-0.525447	0.456505	-0.606822	1.50047	1.39973	0.695184	1.28628	-0.215071	0.769518	-0.492846	0.747481	-1.26144	-0.324417	-1.0121	2.93897	0.697717	0.0964063	1.35286	0.909686	-0.895085	1.11376	-0.656574	-1.15637	0.797639	1.62638	0.560159	2.64333	-1.32862	0.242311	0.441421	0.609198	2.16473	2.0616	-0.901088	1.41424	0.523764	279	-0.0641203	1.98778	0.622348	1.50117	-1.05249	0.588428
280	0.647744	0.137251	0.684087	0.222302	-1.11256	0.922238	-0.619361	-0.132415	-1.20455	0.0753953	-0.518638	0.518041	0.217358	1.0656	0.964837	0.456067	0.649263	-1.2965	1.96882	-1.51701	-0.471839	0.910713	-1.22926	2.15803	0.26675	0.257325	0.575592	-0.421914	0.933566	0.95584	-1.32297	0.0431571	1.52051	-1.01869	-1.10684	-0.702415	2.12374	2.67044	3.11799	-0.797126	1.59925	1.57341	280	1.31004	1.06595	0.401496	1.32022	-1.30471	0.182393
281	0.614935	1.43374	2.39821	1.21188	0.997578	0.914693	-0.0322468	0.0417822	-0.57473	-1.42002	-0.673537	-0.0915409	-1.75831	1.34595	0.53939	1.22112	1.45677	-0.331406	-2.35851	0.92957	0.907531	0.851121	1.17815	1.73389	1.49341	1.67794	0.0637121	-0.589599	0.1094	0.294304	0.388109	1.08145	2.68117	-0.983123	-1.28831	0.885936	0.647236	2.25999	3.31832	-0.778596	0.0661345	3.19816	281	-0.784495	0.660749	1.37866	-0.399871	0.00200676	0.317229
282	1.57714	0.0776902	1.94123	-0.48547	-0.712879	0.466209	-1.70658	-1.02388	-0.828797	0.131051	1.13068	0.47193	0.461028	0.841241	0.963616	-0.398247	0.676425	-0.568092	-2.24617	-3.61353	1.49937	1.23057	1.87193	1.05001	-1.31202	0.942186	-1.45012	0.595653	-2.279	1.69056	0.824094	2.75572	0.668523	-0.371711	0.440346	1.07082	1.46222	2.71921	1.23923	-0.718231	-0.158067	-0.0762675	282	-0.413878	1.60065	0.600479	0.0515634	-1.47369	0.475386
283	0.0784447	0.513721	1.0943	2.10108	0.247925	1.17549	-0.680268	1.03676	-1.49859	-0.444069	-1.47387	1.00415	0.0748622	0.836363	1.38698	0.46056	0.814115	-0.207556	-1.48717	-0.643596	-0.172104	0.475669	0.703347	1.85145	0.457104	2.91265	0.938173	-0.878234	-1.29176	0.652448	1.78131	1.52296	0.963485	0.568468	-0.127703	-0.00510928	1.07104	1.57383	2.03526	0.459632	-1.42067	0.817028	283	0.63281	1.23122	0.314008	0.758729	0.278628	0.467053
284	-0.703808	1.73666	-0.776289	1.13981	-0.78127	0.679894	-0.389179	-0.794274	-0.951269	-0.276647	0.0611464	-1.19647	-1.15683	1.25062	1.00543	-0.0671867	1.38507	-0.648849	-1.6004	1.12962	2.0845	0.315551	1.31893	1.6558	1.30262	-1.60576	0.0577064	0.244344	0.601609	0.348123	1.77004	1.73031	-0.439017	0.195252	1.23309	1.21336	1.50267	2.39128	1.38671	-1.44338	1.148	0.980042	284	-0.239398	1.51919	0.277742	0.735092	-0.688213	0.9517
285	-0.838092	1.30588	2.21576	0.879416	2.49992	1.41202	-0.304366	1.7511	-1.04922	-0.0872105	0.342602	-0.147157	0.0222064	0.147456	0.806446	0.579987	0.210411	0.663488	-1.00618	-1.05858	0.911165	1.26443	-0.480156	1.19549	0.729149	1.00698	0.56899	0.186264	0.23627	0.724748	-0.0200158	2.60625	1.67286	-0.229824	-1.10104	0.109957	1.03094	-0.977334	3.51522	0.172634	0.436087	1.23167	285	-1.44423	0.669578	0.824979	1.58151	0.33273	0.844407
286	-0.344656	0.0490983	1.00711	-0.302875	1.04146	1.66196	0.744177	0.0469502	0.24421	-0.162999	0.553274	0.573735	1.10928	0.988023	-0.152115	0.201068	0.334172	0.525984	-2.80908	-1.41247	-0.12212	0.465971	0.737618	-0.3303	0.47708	0.0570373	-0.772529	-0.234412	1.2162	1.67085	1.1699	2.23506	1.30489	-0.124759	-0.0871675	0.465061	1.02779	1.72958	3.23641	2.42859	0.080753	0.149019	286	-0.949792	2.55726	-0.259652	1.90535	0.710587	-0.302341
287	2.22585	1.20898	-0.052449	-2.32469	0.915392	0.332443	-0.0821268	0.718665	-0.0331496	0.0553226	1.03872	0.382708	-0.165784	0.579789	1.06541	0.56822	0.3103	0.727418	-0.318801	0.427996	1.27603	1.77494	-0.318315	0.893092	1.1273	2.17129	0.442367	-0.112523	-0.303322	2.65757	1.00553	-0.264581	-0.578857	-0.585902	-0.649611	0.810469	1.035	2.01382	1.39954	2.42595	-0.530816	4.30119	287	-1.78515	1.707	-1.20518	1.76655	0.884528	0.475411
288	1.51238	-0.839187	0.951856	-0.736888	0.772575	1.29223	0.931282	1.47839	-0.124892	-1.05123	-0.556978	0.215671	0.160638	0.603451	1.60971	1.34334	0.576993	0.877879	-2.20095	-1.93847	0.00784843	0.360985	0.720192	0.521216	0.975236	0.71055	0.996158	-0.227187	-0.441167	1.15493	0.742926	0.686654	0.681287	1.13929	-1.02593	1.25737	1.0986	2.25687	2.97186	-1.18946	0.195521	0.973618	288	-1.58077	2.23427	-1.48295	-0.0971513	-0.077125	0.550205
289	0.799518	0.375178	-0.358269	1.37765	-0.476648	0.64097	-0.872532	1.1413	-0.885164	0.108679	0.428294	-0.968461	0.323774	1.47281	0.378591	-0.645141	1.33319	0.561503	-1.63348	-0.158429	0.577596	0.522707	0.0832235	0.744668	0.913381	2.13445	0.753163	-1.19569	-1.85388	1.14055	0.30992	0.812382	-0.0872183	0.655015	-0.645928	0.994815	0.310852	3.47692	0.382999	-0.407587	-0.167155	1.57012	289	-1.30547	2.2523	-1.37373	1.17384	1.13049	-0.437341
290	0.900645	0.569262	-0.0962267	-1.27301	0.804143	1.31501	1.96083	0.443039	-0.137536	-1.11761	-0.932944	-0.0736269	0.612092	0.903771	0.918001	-0.162686	0.784468	-0.523804	-1.91043	-3.20977	0.647977	0.819231	-0.0913756	1.3481	1.6969	-0.925514	0.172391	-0.443187	1.10608	0.987633	0.215915	1.07097	0.356844	0.706324	-0.844266	1.02102	-1.36562	1.79912	2.23177	0.862052	-0.515886	0.118702	290	-1.23742	0.736227	0.566018	1.17891	-0.348573	0.368805
291	0.724688	1.10341	-0.280575	1.19047	-0.558373	0.374959	-0.313157	1.5509	-1.4638	-0.60541	-1.42924	0.0613526	0.159403	1.434	0.509526	0.147632	-0.123853	-0.286053	-1.27072	1.66571	0.0850355	0.627389	1.01191	0.463021	0.511682	-2.70453	0.878084	0.797065	-0.209283	1.76569	0.915821	2.77324	0.566737	-0.00882207	-0.981689	0.541069	1.83962	2.13456	2.28271	-0.642191	-1.05377	-0.974072	291	-0.91141	2.50245	-0.781205	1.41016	-2.91967	2.12637
292	2.58201	0.753714	0.823099	0.755309	0.194181	0.848351	0.0355843	0.780991	0.586356	-0.314793	-0.417216	0.685973	-0.634646	0.942718	-0.849755	-0.0185587	1.02448	0.35973	-0.847758	-0.879312	0.604801	0.46211	1.09426	1.31021	0.834637	1.91011	0.388402	-0.0618304	-0.0664093	1.5577	-0.231411	-0.492097	0.110728	-0.0883355	-0.95529	-0.381573	1.10944	1.59206	3.35113	0.129662	0.95144	-0.14285	292	-0.540085	1.87784	-2.07599	-1.04975	-0.121967	1.13695
293	1.51721	-0.586014	1.36196	0.664161	0.921063	-0.079419	-0.402636	-0.0456832	-0.654559	0.408118	-1.72102	0.16069	0.69795	0.696984	0.555012	-0.832541	-0.785941	0.432694	-0.404413	1.01343	1.37771	-0.0669057	0.571478	1.95684	1.66055	-0.419144	1.42143	0.566822	-3.71137	0.459888	-0.240331	1.84611	-0.581946	-0.383262	-1.24419	-0.90927	-1.39292	1.3549	-0.557113	1.0778	1.40946	0.00871652	293	-0.501308	1.72124	-1.09853	2.25249	-0.877401	0.580879
294	1.20718	0.376049	-0.355177	0.21728	-1.03607	2.41076	0.35036	0.792096	-1.21509	-0.456253	0.189827	-0.102638	0.149539	2.09848	-0.504185	-0.389725	-0.302062	-0.759585	0.687347	-0.89318	1.54756	0.598786	-1.28825	0.501284	0.748424	0.667193	1.44026	-2.44001	-0.194201	1.65999	0.922501	1.76431	1.2461	0.0147576	-0.762806	1.36708	1.12151	1.86745	1.41066	0.132414	-1.16137	-0.202315	294	-1.24148	2.25172	-1.1701	0.14161	-0.466067	1.67989
295	2.04191	-0.184756	0.316985	1.13774	0.403687	1.01994	-0.553025	0.695512	0.438576	0.251328	-1.58431	0.487476	-2.20291	1.01019	-0.311231	-1.34104	0.300213	0.793609	-0.346034	-0.363567	1.17819	0.0355527	0.257373	2.35289	-0.429827	1.70052	1.37784	-0.205032	0.486362	1.78579	0.340796	2.44778	1.12715	2.30617	0.0802925	-0.601387	1.74202	3.8443	2.63391	0.842585	1.28143	-0.614509	295	-0.310258	1.82305	-0.377957	1.43949	-0.823865	-1.10177
296	1.19144	0.383336	0.24439	0.936403	0.350916	0.802798	-0.707991	-0.0488402	-0.684704	0.658487	-1.19631	-0.0157947	0.853109	0.877215	-1.14285	0.399112	-1.33697	0.0813473	-3.01708	0.771683	1.75793	0.783874	0.587868	1.1211	-0.0613499	-0.519335	1.50657	-0.0055405	-0.621529	-0.506807	-0.483379	0.253182	-0.244491	-0.310322	-0.884321	-0.0454057	-0.549024	1.36021	3.30103	-1.81908	-1.02163	2.24497	296	-0.811792	-1.72206	-0.453233	3.28159	-0.14109	2.40069
297	1.23767	0.257676	-0.0185413	-1.06311	0.683704	2.45205	0.454431	-0.208609	-1.28955	-0.525319	-0.518355	0.504867	-1.31119	0.422053	-0.265135	-0.0246	-0.725737	1.15572	-3.75344	-0.293899	-0.491243	0.809886	1.06791	0.446486	-0.252988	-0.503426	0.830073	-1.54679	0.130869	1.51134	1.25365	-0.0799508	-0.130378	0.890134	-1.21375	-0.0788933	-0.212821	-0.0209246	2.81233	0.00190865	-0.594396	1.58042	297	0.712334	-2.61397	-0.376352	-0.427607	-1.03228	0.341463
298	0.117948	0.893988	1.02795	-0.599874	0.0967305	3.63663	-1.46098	0.0299859	-0.748603	-1.28983	-0.177319	0.625128	-1.86404	0.913571	0.146445	1.72868	1.0878	-0.372364	0.619929	1.16049	1.31514	2.17373	-0.0781741	0.785924	1.53752	0.73425	-1.25792	-0.33237	-0.188238	1.10214	0.185433	2.99654	2.25572	-0.71693	-0.619919	-0.482046	1.67058	-1.62987	1.05723	1.0331	-0.475122	3.19912	298	0.226439	-0.149049	-0.450133	1.82769	0.0511297	-1.2368
299	1.78276	0.0335564	0.491872	-1.73887	0.931822	1.20743	0.923359	1.043	-1.43791	0.604173	1.1047	-0.108747	-0.0957407	1.18851	-0.0762963	0.304604	-0.0311284	-0.179831	-0.339763	0.193396	0.294539	0.0304488	1.39993	1.69117	-0.0853795	1.75301	0.25207	-0.958426	-0.0257385	0.534173	-0.894808	0.884266	0.993416	-0.519025	-0.780347	1.6191	0.652585	1.1674	1.42989	2.26483	-1.92157	0.78541	299	-1.39322	-0.835868	-0.699089	0.900173	-1.8345	-1.25772
300	2.01337	-0.205701	0.83919	1.30379	0.551927	0.633893	-0.799844	0.411478	-0.336207	-0.622739	0.0124476	-1.15931	0.431309	0.663281	-0.23912	0.624187	-0.941961	-0.608136	-1.89087	1.14776	0.916648	0.694385	0.96665	1.19443	-0.0189579	0.30236	0.844161	-0.0534821	-1.01622	1.81898	0.31035	-0.595573	1.91344	-0.182509	-0.860793	1.09712	0.0218184	-0.334197	0.93668	-2.7514	-0.430071	2.74458	300	0.43262	-2.22157	0.58394	1.00726	-0.503663	1.02337
301	1.73959	1.41812	-1.07512	-0.204994	-0.722623	1.95846	0.487828	-0.559383	-0.300725	-0.171709	-1.2503	-0.0630104	-1.95252	1.27036	0.6303	0.30502	0.323382	-0.75941	-0.0742839	-0.309848	-1.11523	0.39188	0.132033	1.08476	0.328439	1.31256	1.72613	-1.6281	-0.161075	1.32215	0.241842	1.24022	1.05557	-0.156362	0.239416	0.775285	-0.168917	1.94077	2.48236	-0.678213	0.930413	1.27395	301	-0.403655	-0.446255	0.572641	0.779799	-1.83469	0.164697
302	1.09611	-1.7432	1.04	-0.0653245	0.912764	1.02792	-1.89414	-1.13577	-0.930534	0.15883	-0.464325	-0.221352	-1.66719	0.994434	0.74554	1.47456	-0.516049	0.730058	-2.90927	0.291598	-1.10113	-0.312457	0.329969	0.594664	-1.0105	0.924071	0.122966	-1.12093	-1.49533	1.37052	0.152459	2.40549	1.80909	-0.83427	0.0755029	0.736877	-0.609103	3.2402	-1.01706	-3.12879	1.12381	2.17638	302	-0.30164	-1.4541	1.28797	1.37445	0.0777029	2.08359
303	0.379574	-0.276072	0.328534	0.842811	0.422404	1.43516	0.122002	0.459191	-1.79752	-0.298433	-0.50234	-0.113453	-1.33993	1.27412	0.19407	0.469606	0.285113	-0.321779	-0.535904	0.414883	0.0844181	1.05331	0.934692	1.54552	0.635693	1.51048	0.320223	-0.492138	0.200362	0.2243	0.755381	1.64581	1.18099	-0.116275	-0.25584	1.38576	0.91717	1.80792	2.24807	1.85776	-0.242081	0.58874	303	-0.751273	-1.26003	1.07394	2.90272	-0.252782	0.77563
304	2.30544	0.0365289	-0.276627	1.03241	-0.213418	1.84526	0.585586	0.244162	-0.430983	0.340637	-0.265765	0.0164502	0.332089	1.33388	1.12559	0.962677	0.784642	-0.929168	-2.45654	-0.856451	2.37004	0.852495	0.314844	0.62331	0.23422	-1.646	0.369038	0.37448	-1.89197	1.97796	1.47934	2.97216	-1.08208	2.31126	0.675092	0.4774	0.850336	-0.0650867	4.95236	-1.1431	2.00199	3.11565	304	-0.287753	-0.580803	2.2311	0.15277	-0.594749	-1.22096
[truncated: 346 more rows]
[truncated: 12 more columns]

## Sheet: Fig 4C
Source Data	Figure 4C	AWC VGLUT-pH Data: individual dF/F(%) traces
		Three trials per animal: Read from left to right; Trial 1 signifies a new animal
		Acquisition Rate: 5 Frames/sec
		Stimulus ON:	Frame 25
[truncated: 628 more rows]
[truncated: 10 more columns]

## Sheet: Fig 4D
Source Data	Figure 4D	ASH VGLUT-pH Data: individual dF/F(%) traces
[truncated: 657 more rows]
[truncated: 16 more columns]

[truncated: 5 more sheets: Fig 4E, Fig 4F, Fig 4G, Fig 4H, Supporting Stats]
