# Supplementary material for: Diverse modes of synaptic signaling, regulation, and plasticity distinguish two classes of C. elegans glutamatergic neurons
Source: eLife. 2017 Nov 21;6:e31234. doi: 10.7554/eLife.31234 (PMC5705214; doi:10.7554/eLife.31234)
Supplement: Figure 5—source data 1. [file elife-31234-fig5-data1.xlsx]

## Sheet: Fig 5A
Source Data	Figure 5A	AWC cyto-pH data: individual dF/F(%) traces
		Three trials per animal: Read from left to right; Trial 1 signifies a new animal
		Acquisition Rate: 5 Frames/sec
		Stimulus ON:	Frame 150
		Stimulus OFF:	Frame 450
	Axon										Cell body										Cell body
Frame / Trial #	1	2	3	1	2	3	1	2	3	Frame / Trial #	1	2	3	1	2	3	1	2	3	Frame / Trial #	1	2	3	1	2	3
1	0.646409	1.10834	1.60733	-0.643772	4.65442	-0.0266803	-0.314741	0.461891	-1.09541	1	5.24602	1.59431	0.712266	3.27347	1.76504	2.12243	1.45458	1.29782	0.645806	1	0.0665898	5.24582	1.27523	2.1285	1.33348	1.32351
2	0.553711	0.653464	-0.457429	-1.025	3.50723	-0.489534	-0.924631	0.476571	-1.26595	2	4.85742	1.29241	-0.00124112	2.07897	0.827941	0.827017	1.2355	1.16175	0.472746	2	-0.124555	2.88432	1.09138	0.421404	1.15276	1.24846
3	0.219215	0.719331	-0.167912	-1.64498	3.77923	-1.03047	-1.09628	0.420197	-1.22493	3	4.5583	1.87366	-0.119816	1.83699	0.156783	0.785125	1.27648	1.22724	0.525204	3	-0.196648	2.40916	1.02081	-0.0494688	0.914286	1.03923
4	0.067882	0.24587	-0.803628	-1.46282	3.21962	-1.15722	-1.6297	0.384376	-1.41247	4	4.3765	1.68935	0.110278	1.31526	-0.154858	0.888267	1.21362	1.18968	0.545911	4	-0.233025	2.19496	1.07325	-0.118148	0.878266	0.994716
5	0.335367	0.373475	-0.867473	-1.51009	3.28255	-0.891278	-1.56294	0.160055	-1.1628	5	3.79135	1.36726	-0.320787	1.2039	0.817215	0.759023	1.08159	1.14205	0.527452	5	-0.246253	1.95308	0.965138	-0.210544	0.86833	0.905682
6	0.585541	0.473825	-1.31861	-1.43853	3.75243	-0.88313	-1.4465	-0.359055	-0.692192	6	3.19461	1.62468	-0.521137	1.35674	0.596909	0.518662	1.15356	1.02987	0.619183	6	0.544121	1.97932	0.31258	0.357666	1.40677	1.41508
7	-0.125333	0.393091	-1.01434	-1.16248	3.49558	-1.46164	-0.879814	-0.169967	-0.738491	7	3.29819	1.48731	-0.736552	1.19749	0.325897	0.380145	0.963349	1.06216	0.591636	7	0.305355	1.63536	0.956722	0.168921	0.7907	0.807108
8	-0.27499	0.44244	-0.180133	-1.10328	2.98235	-1.39057	-1.22218	0.145374	-1.26478	8	2.77622	1.04183	-0.357049	1.28535	0.110985	-0.267368	0.991634	1.05264	0.370508	8	-0.389115	1.4679	0.905579	0.340372	0.578307	0.610597
9	-0.20072	0.997462	0.0143537	-1.53525	2.98701	-1.04768	-1.86834	-0.121227	-1.11006	9	2.79374	1.09396	-0.42137	0.962317	-0.197535	0.172403	0.756808	0.858434	0.382059	9	-0.349431	1.96835	0.852494	-0.453145	0.568991	0.578163
10	-0.29621	0.0445504	-0.83987	-0.934353	3.36855	-0.769737	-1.12123	-0.073662	-0.479449	10	2.66614	1.03307	-0.0782106	0.874138	-0.0279008	0.32029	0.628449	0.929316	0.605516	10	0.366204	2.1358	0.796172	-0.593962	0.619916	0.618228
11	-0.0745161	0.604734	-0.502943	-1.43159	3.30982	-1.13278	-1.10875	-0.333804	-1.21496	11	2.79682	0.985096	-0.315181	1.67964	0.123629	-0.222785	0.62213	0.965455	0.409339	11	-0.271386	1.32001	0.787109	-0.194733	0.770827	0.86498
12	0.689408	0.0786198	-0.495568	-1.16075	3.00542	-1.0565	-1.36957	-0.43011	-1.20852	12	2.29109	0.875407	-0.850998	1.06643	-0.526533	0.284688	0.733344	0.881202	0.374631	12	-0.37258	0.709364	0.675759	-0.0717031	0.567128	0.634127
13	-0.239251	0.265072	-0.597974	-1.48299	3.24153	-0.901916	-1.1575	-0.82414	-0.773069	13	1.88854	0.876324	-0.613351	0.664475	-0.313247	-0.109332	0.479321	0.634997	0.497041	13	0.304694	1.99364	0.230363	-0.503542	0.639168	0.543821
14	0.119815	-0.1737	-1.06617	-0.639652	3.02593	-1.05469	-1.22704	-0.361404	-1.18859	14	2.10137	1.14169	-0.37286	1.35555	-0.487366	-0.296226	0.570608	0.833873	0.483776	14	-0.295858	2.00842	0.660222	-0.613232	0.743502	0.73906
15	0.817287	0.0158495	-0.516218	-1.26028	2.8728	-0.773811	-0.988624	0.200574	-1.05672	15	2.59724	1.0115	-0.565767	0.915679	-0.129896	-0.0881267	0.454687	0.870871	0.455813	15	-0.283291	1.69928	0.946364	-0.674499	0.798153	0.905682
16	1.3221	0.639836	-0.36282	-1.80328	3.38044	-0.924323	-1.0942	-0.448314	-1.36793	16	2.36527	1.50139	-0.646354	0.732781	0.554037	0.167344	0.512817	0.73231	0.390358	16	-0.329589	1.71932	0.943774	-0.63596	1.37571	1.52193
17	0.662603	0.99932	-0.261046	-1.70418	3.14107	-0.509678	-1.44997	-0.436569	-0.688675	17	1.69144	0.737287	-0.395989	1.28205	-0.339574	0.303559	0.508575	0.737046	0.599172	17	0.420439	1.12632	0.844725	-0.218449	0.628611	0.729521
18	0.750276	0.602876	0.190298	-1.79525	2.71408	-0.75163	-1.36703	-0.185823	-1.04032	18	1.95393	1.02341	-0.357049	1.18394	-0.50105	0.521839	0.48379	0.723612	0.480724	18	-0.213844	1.71741	0.936653	-0.071209	0.804984	0.810924
19	1.33997	0.31277	-0.598816	-1.48342	2.62668	-0.749593	-1.25268	-0.770115	-0.934823	19	1.25159	0.812575	-0.0835131	0.0138523	-0.299823	-0.032292	0.584052	0.47332	0.50127	19	-0.242284	1.12155	0.152678	0.107159	1.42974	1.52956
20	0.558178	1.03793	-0.420765	-1.43962	2.6078	-0.609718	-1.62739	-0.812396	-0.944786	20	1.83557	0.698474	-0.758301	1.19496	-0.19578	0.22934	0.419944	0.479053	0.371378	20	-0.336865	1.31381	0.188284	-0.0529275	0.801879	0.816647
21	0.588333	1.23533	0.311035	-1.2219	2.56468	-0.849406	-1.49432	-0.198742	-0.373371	21	1.62568	0.805268	-0.907586	0.682169	-0.0577062	0.58779	0.269029	0.598223	0.570661	21	0.374141	0.622537	0.742439	-0.150264	0.780764	0.784214
22	0.789924	1.20167	-0.36282	-1.39646	2.91895	-1.57028	-1.11083	-0.759545	-0.944786	22	1.49712	0.695966	-0.608808	1.39917	0.282602	0.131678	0.289899	0.338261	0.480536	22	-0.267417	1.2079	0.148793	-0.183863	0.752817	0.859893
23	0.647526	0.879767	-0.322574	-1.14513	2.9341	-1.38582	-1.00064	-0.0360793	-0.613659	23	1.15606	0.787326	-0.692834	0.558602	0.137573	-0.00268862	0.0558659	0.549361	0.497188	23	0.330489	0.718428	0.854436	-0.296022	0.728597	0.719346
24	0.765353	0.623524	-0.122398	-1.51205	2.83272	-0.80165	-1.14803	-1.23931	-0.815265	24	1.18574	0.854053	-0.503572	1.06697	-0.0213026	0.473138	0.177024	0.343508	0.533931	24	0.380094	1.37583	0.0303232	-0.0094471	0.713692	0.796297
25	0.584424	0.517599	-1.18649	-1.21886	3.36179	-1.68865	-0.758991	0.413738	-0.357547	25	0.856061	0.538614	-0.571622	0.751597	-0.330148	0.385398	0.167394	0.547056	0.550676	25	0.429699	1.08005	0.693239	0.147181	0.80871	0.925396
26	0.553711	0.93655	-1.02445	-1.74213	3.25481	-1.12735	-0.73404	-0.213422	-1.13409	26	0.98426	0.342894	-0.351857	0.462025	0.0979517	-0.0774591	0.105903	0.630586	0.373453	26	-0.203262	0.631602	0.708776	-0.260447	0.595696	0.681824
27	0.388976	0.292122	-0.150423	-1.64801	2.50431	-1.18325	-1.49502	-0.204027	-1.03563	27	0.979019	0.301898	-0.519521	0.816601	-0.130611	-0.0545675	0.077882	0.389715	0.276368	27	-0.213183	1.5137	0.846667	-0.634478	0.680777	0.701539
28	0.545893	0.355924	-0.279378	-1.63001	2.97676	-0.469164	-0.863411	-0.202852	-1.02918	28	1.07682	0.760558	-0.412573	1.06611	-0.382706	0.115984	0.0175233	0.523229	0.344473	28	-0.34877	1.1893	0.642096	-0.566787	0.703756	0.817283
29	0.431974	0.0571458	-0.594181	-1.19696	2.66001	-0.335627	-1.09535	-0.114768	-1.15987	29	0.506953	0.78893	-0.637033	0.449428	-0.0337513	0.253917	-0.118652	0.290596	0.317649	29	-0.193341	0.755163	0.336533	-0.330609	0.696924	0.664017
30	0.381158	0.300587	-1.06154	-1.22038	2.87467	-0.900332	-0.884203	-0.0924533	-1.11533	30	0.896299	0.518863	-0.0618335	0.939014	-0.679785	-0.0489581	-0.0960443	0.437942	0.279862	30	-0.327605	0.906871	0.897163	-0.971945	0.68264	0.693907
31	0.403495	0.126111	-0.319835	-1.18438	2.62971	-0.838995	-1.04545	0.248139	-1.02449	31	0.355426	0.382564	-1.02413	1.11101	-0.1728	-0.0626736	-0.0173199	0.572889	0.323993	31	-0.210537	1.28423	0.804588	-0.716992	0.608737	0.623952
32	0.349328	0.681339	-0.171494	-0.898356	3.00472	-0.674223	-0.750674	-0.965662	-0.253228	32	0.450046	0.895061	-0.183156	0.581136	-0.182779	-0.09526	-0.044346	0.310758	0.456657	32	0.471367	1.15829	0.360486	-0.38496	0.657799	0.563536
33	0.340393	0.237817	-0.803628	-1.74169	2.89308	-0.396285	-0.899912	-0.780685	-0.531609	33	0.57733	0.938469	-0.419878	0.844039	0.00369237	-0.177164	-0.0795416	0.35911	0.521255	33	0.390015	0.884926	0.300927	-0.352349	0.707482	0.791845
34	-0.0147647	0.0307162	0.183766	-1.57146	2.42111	-0.444041	-0.576716	-0.231626	-0.274326	34	0.599763	0.554035	-0.611832	0.642326	-0.618062	-0.433575	0.00298433	0.29401	0.547182	34	0.500469	1.22746	0.276327	-0.571728	0.569612	0.52347
35	0.324199	0.432529	-0.410651	-2.04398	2.64323	-0.634615	-0.837075	-0.261575	-0.961196	35	1.27434	0.519478	-0.506141	0.961484	0.00785278	0.697774	0.0305517	0.345053	0.224861	35	-0.107359	0.853439	0.315817	-0.267365	0.630474	0.658294
36	0.196878	0.126111	-0.658448	-1.303	3.16951	-0.758646	-1.14248	-0.292111	-0.366338	36	0.604592	0.526906	-0.791152	0.410323	-0.302325	-0.0582639	-0.0564555	0.443101	0.506357	36	0.343055	1.04713	0.85832	-0.484273	0.686367	0.833818
37	0.196878	0.134163	-0.819642	-1.33011	3.0567	-0.956689	-1.38898	0.343858	-0.951233	37	0.583054	0.657309	-0.774305	0.683066	-0.312759	0.581922	-0.0939421	0.45226	0.344607	37	-0.267417	1.2766	0.820772	-0.906724	0.541045	0.55654
38	0.0220912	0.0203921	-0.35102	-1.4201	3.30446	-0.58369	-1.41208	-0.939824	-0.871528	38	0.611281	0.462867	-0.860374	0.464621	-0.339249	-0.149376	0.00605576	0.353464	0.180997	38	-0.176806	1.04904	0.111893	-0.290093	0.543529	0.763227
39	0.14997	0.122394	-0.482714	-1.18937	2.79403	-1.16469	-0.678596	-0.536398	-0.11726	39	0.208396	0.526508	-0.437622	0.642871	0.152265	-0.328553	0.0930252	0.255454	0.491981	39	0.50576	0.656886	0.0374444	-0.427946	0.664009	0.765135
40	0.459337	0.0552874	-0.518114	-1.02673	3.02314	-0.321142	-0.914698	0.354428	-0.819368	40	0.500334	0.00978983	-0.500811	0.585047	-0.364439	0.0879049	-0.160305	0.49372	0.335947	40	-0.19797	1.02662	0.678349	-0.55394	0.665252	0.801384
41	1.15793	0.142629	-0.858623	-1.80024	2.68844	-0.596364	-0.808198	-0.691426	-1.0157	41	0.400443	0.259455	-0.397398	0.408688	-0.0238054	-0.0263908	-0.0832424	0.270507	0.494337	41	-0.243607	1.33576	0.0445655	-0.104313	0.702514	0.722526
42	1.11437	0.311531	-0.608088	-1.82778	2.89425	-0.131247	-0.89483	-0.545794	-1.07431	42	0.449131	0.430662	-0.747613	0.276371	-0.0509455	0.379432	-0.0617927	0.33866	0.451088	42	-0.157625	0.945991	0.130019	-0.5406	0.601906	0.693271
43	1.04624	0.26817	0.407962	-1.17549	2.75277	-0.890599	-0.537212	0.0167712	-0.5867	43	0.821888	0.225863	-0.724124	0.8275	0.239276	0.355568	-0.0957673	0.438914	0.56615	43	0.460785	0.930724	0.913995	0.00290528	0.473973	0.489129
44	0.893791	0.116199	0.238972	-1.53048	2.86838	-0.139848	-0.917008	0.179434	-1.02801	44	0.443628	0.416892	-0.731774	0.406733	0.316373	0.349018	-0.177198	0.467962	0.321316	44	-0.295196	0.699346	1.04865	-0.844962	0.683262	0.721254
45	0.63915	0.627241	-0.687947	-1.73193	2.21134	-0.549966	-1.0443	-0.457709	-1.21614	45	0.380263	0.585976	-0.750678	0.31413	-0.139679	-0.0731791	-0.164585	0.384257	0.338958	45	-0.250882	0.663565	0.359191	-0.216967	0.563402	0.510115
46	0.761444	1.10545	-1.13086	-1.53937	2.88096	-0.125136	-0.397214	-0.538747	-0.885007	46	0.721514	0.191836	-0.85811	0.334195	-0.968966	0.0970485	-0.0468258	0.317837	0.435722	46	-0.27337	0.971752	0.202526	-0.0277286	0.593833	0.707263
47	0.740224	1.19321	-0.61778	-0.709044	2.6409	-0.486139	-0.668893	-0.398399	-0.85922	47	0.187079	0.276565	-0.191345	0.436767	0.0321327	-0.135109	-0.0243817	0.442939	0.272406	47	-0.248237	1.15018	0.231658	-0.0973961	0.562781	0.634127
48	0.295719	0.513263	-0.381784	-1.26397	2.7861	0.0690592	-1.09143	-0.382544	-0.535712	48	0.181134	0.767528	-0.510049	0.02568	-0.370712	-0.203849	-0.19	0.377166	0.34537	48	0.448879	0.996083	0.14232	-0.274282	0.0808586	0.0782993
49	0.893791	1.08212	-0.254514	-1.35374	2.49453	-0.266142	-0.702622	0.0637495	-0.853946	49	0.469109	0.185385	-0.634396	0.750251	0.133933	0.141989	-0.137395	0.53027	0.199495	49	-0.245591	0.997037	0.763803	-0.766895	0.727355	0.792481
50	0.792158	0.956785	-0.822381	-1.15402	2.6085	-0.038676	-0.81097	-0.536398	-0.907278	50	-0.0567243	0.200783	-0.426962	0.513695	0.288063	-0.401021	-0.152916	0.00716842	0.0317353	50	-0.201939	0.917843	0.181162	-0.947734	0.641652	0.686276
51	0.970853	1.05713	0.295021	-1.30777	2.6099	-1.48948	-0.735427	-0.760719	-1.11885	51	0.825329	0.249327	-0.141344	0.111808	0.0425337	0.579522	-0.208957	0.263903	0.27863	51	-0.159609	1.0123	0.0698133	-0.752566	0.598801	0.705991
52	0.954659	1.02658	0.0442747	-1.45545	2.7262	-0.819757	-0.328602	-0.159397	-1.77231	52	0.522858	0.232699	-0.400629	0.0965184	-0.144945	0.418665	-0.125047	0.225857	0.13222	52	-0.938078	1.03616	0.0704607	-0.330115	0.621779	0.538733
53	0.822313	1.46411	-0.245032	-1.47757	2.96673	-0.901463	-0.57533	0.581685	-1.062	53	0.484983	0.709313	-0.912847	0.478629	-0.145822	0.461206	-0.0293916	0.463413	0.272848	53	-0.295196	1.07528	0.722371	-0.189298	0.623021	0.724433
54	0.803326	1.24586	0.0135108	-1.73866	2.36424	-0.983396	-0.390515	0.249314	-1.17511	54	0.00968897	0.458274	-0.644669	0.654186	0.419051	0.623652	-0.045995	0.366587	0.0179751	54	-0.243607	0.922137	0.750208	-0.449192	0.627368	0.597878
55	0.689408	1.01026	-0.0695095	-1.46607	2.4838	-0.667207	-0.541139	0.467176	-1.34273	55	0.267234	0.600783	-1.0882	0.413688	-0.100838	0.437925	-0.147012	0.377814	0.177034	55	-0.333558	0.76709	0.662812	-0.0993724	0.589485	0.703447
56	0.605644	0.736676	-0.165594	-0.413042	2.88912	-0.683503	-0.338536	0.0467199	-1.10185	56	-0.0581024	0.250713	-0.990507	0.784965	0.252537	-0.324792	0.0188576	0.41485	0.0807529	56	-0.382501	0.500885	0.662165	-0.457592	0.501299	0.62904
57	0.711745	0.998907	-0.00566392	-1.52918	2.26029	-0.093449	-0.357248	0.162404	-1.38023	57	0.353123	0.358328	-0.676125	0.0880562	-0.518342	0.217732	-0.150084	0.412271	0.168869	57	-0.296519	0.840081	0.568942	-0.452651	0.524277	0.630312
58	0.431974	1.53431	-0.264207	-1.15663	2.11322	-0.00336786	-0.326985	0.237569	-1.17394	58	0.134106	0.327569	-1.03476	0.476866	-0.787273	0.258489	-0.321455	0.192099	0.144749	58	-0.403005	0.643529	0.589658	-0.180898	0.475836	0.614413
59	0.483908	1.16657	-0.452372	-1.13906	2.71105	-0.254147	-0.657804	0.108966	-1.21086	59	-0.106449	0.237679	-0.768602	0.549467	0.014646	-0.0724982	-0.125877	0.147661	0.14756	59	-0.263449	0.683602	0.472483	-0.270823	0.464037	0.44016
60	-0.169448	0.718712	-0.675094	-1.16075	2.84833	-0.380215	-1.00387	0.113664	-1.18625	60	-0.502413	0.296737	-0.692737	0.186621	0.066131	0.109726	-0.390927	0.226157	0.0963335	60	-0.363321	0.863458	0.423282	-0.407688	0.0920372	0.0884746
61	0.382833	0.387103	-0.329949	-0.929366	2.53928	-0.677392	-0.592888	-0.0448878	-1.30053	61	-0.526516	0.337661	-1.21223	0.628543	-0.0946624	0.294221	-0.14194	0.286047	0.145472	61	-0.358029	0.699823	0.431698	-0.423993	0.572096	0.704719
62	0.931205	0.269822	-0.0810986	-1.25725	1.97757	-0.379762	-0.162499	0.250488	-1.34448	62	-0.491599	-0.208176	-0.986599	0.321855	-0.189799	0.816058	-0.227575	0.252463	0.0549457	62	-0.358691	0.806209	0.470541	-0.0978902	0.645999	0.712986
63	0.00589696	0.985279	0.0364783	-0.823976	2.27963	-0.17674	0.0562763	0.0848898	-1.10537	63	-0.208191	0.634532	-0.820205	0.586745	-0.436499	-0.187507	-0.398769	0.262956	0.136021	63	-0.270063	0.798576	0.498378	-0.191768	-0.183081	-0.0520723
64	0.643617	-0.2183	-0.585963	-1.11521	1.94028	-0.321368	-0.403683	0.0402604	-0.92486	64	0.182945	-0.0392365	-0.81203	0.201975	0.279905	0.194127	-0.263664	0.362561	0.204421	64	-0.274031	0.678832	0.480899	-0.692781	0.39386	0.58643
65	0.0170654	0.54692	-0.367877	-0.901825	1.77386	-0.15637	-0.295104	0.295118	-0.525749	65	-0.178857	0.171664	-1.08441	0.569789	-0.32095	0.0679315	-0.233894	0.271031	0.255794	65	0.231279	0.880632	0.536573	-0.805435	-0.199228	-0.0845062
66	0.23876	-0.0977152	-0.762328	-0.477013	1.99528	-0.0477294	-0.304345	0.279262	-0.875044	66	-0.0338689	0.765466	-0.869143	0.178608	-0.257764	0.0398845	-0.186324	0.250457	0.0248552	66	-0.258819	1.16306	0.444645	-0.151252	0.444163	0.457967
67	-0.498918	0.111657	-0.853566	-0.264715	1.34104	-0.12921	-0.70447	-0.35377	-1.05321	67	-0.522784	0.336998	-0.847643	0.23765	-0.0203925	-0.590736	-0.325294	0.0645791	0.136597	67	-0.233686	0.519968	-0.182664	-0.478344	-0.148303	-0.0355374
68	0.912777	-0.00665696	-0.756428	-0.999192	2.11089	-0.388589	-0.696615	0.731428	-1.17863	68	-0.236901	0.46558	-1.12913	0.587547	-0.232509	0.0550266	-0.160771	0.112718	0.0925588	68	-0.235009	0.937403	0.497083	0.0661495	0.363429	0.415357
69	0.187943	0.439136	-0.316042	-0.985964	2.31086	-0.890373	-0.794568	0.379091	-1.10771	69	0.225125	0.182865	-0.717179	0.264223	-0.148423	0.104376	-0.152614	0.299618	0.0904841	69	-0.310408	0.718428	0.525568	0.0982657	0.390134	0.537462
70	0.00757223	0.33858	-0.598395	-0.534912	1.63169	-0.650232	-0.90176	-0.40251	-0.961196	70	0.396992	0.773291	-0.965265	0.579694	-0.0588438	0.66201	-0.344214	0.143573	0.105623	70	-0.344801	0.781402	-0.174896	-0.0642917	0.434848	0.539369
71	0.849117	0.0445504	-0.550563	-1.08073	2.57027	-0.443815	-0.643019	0.581685	-0.271396	71	0.119097	0.218037	-1.14087	0.40997	0.0410711	0.426804	-0.282068	0.179064	0.255661	71	0.38803	0.296699	0.570884	0.368042	0.80871	0.508843
72	-0.418505	0.258465	0.45748	-0.966881	2.72946	-0.552003	-1.04823	0.433116	-1.03094	72	0.0419198	0.629697	-0.727673	0.539146	-0.204328	0.158687	-0.378465	0.349639	0.0396997	72	-0.336865	0.153101	0.45824	-0.286635	0.192645	-0.0488925
73	0.882622	0.266518	-0.777078	-0.943027	2.04959	-0.388589	-0.920704	0.819513	-0.981122	73	-0.512493	0.00657045	-1.11918	0.237586	0.171279	-0.610644	-0.201442	0.210455	0.109679	73	-0.325621	0.327231	0.508736	-0.0405751	0.663388	0.389283
74	-0.0756329	0.715615	0.0735635	-0.508023	2.30737	-0.395606	-0.665659	0.675054	-0.962368	74	0.0442235	0.638752	-0.907586	0.161619	-0.39665	0.468761	-0.178356	0.261809	0.147734	74	-0.23567	0.552408	0.471188	0.0666436	0.672704	0.467506
75	0.724588	0.363151	-0.284014	-0.577632	1.58577	-0.965969	-0.240583	0.491252	-1.24192	75	0.364148	0.606004	-1.18869	0.375288	0.0339529	0.469215	-0.20294	0.248126	0.0870708	75	-0.38647	1.04474	0.584479	0.334937	0.629853	0.415993
76	0.825663	0.856642	0.155741	-0.724007	1.8615	-0.228571	-1.0272	0.627489	-0.569118	76	0.162112	0.357255	-0.680972	0.359742	-0.30161	0.253074	-0.258239	0.362723	0.294545	76	0.321229	0.926431	0.732729	0.292445	0.675188	0.58643
77	0.784898	0.835168	-0.89908	-0.607991	1.75708	-0.609492	-0.369723	0.456605	-0.479449	77	-0.432751	0.66294	-0.825273	-0.110516	0.497709	0.182389	-0.30971	0.272015	0.285778	77	0.448218	0.936926	0.62138	0.474272	0.695061	0.52347
78	0.557061	0.655322	-0.751371	-0.310905	2.30131	-0.00246252	-0.372957	0.194114	-0.900245	78	0.00976945	0.835979	-0.942826	0.616363	-0.32511	-0.197851	-0.207787	0.277648	0.233561	78	-0.286598	0.731786	0.0989453	0.0962893	0.517445	0.362573
79	-0.185642	0.6578	-0.551617	-0.388321	1.53589	-0.196658	-0.439953	0.0584645	-0.769552	79	0.279406	0.134526	-0.747033	0.346889	0.174399	0.170101	-0.31321	0.181793	0.157411	79	-0.349431	0.49516	0.0406813	-0.110243	0.0156501	-0.134111
80	0.542542	0.714169	-0.82512	-1.04972	1.49697	0.0353353	-0.603746	0.0349753	-0.369855	80	-0.288114	0.511387	-0.833765	0.0976403	-0.381796	-0.0643272	-0.373216	0.255853	0.181278	80	0.314615	-0.103562	-0.0292356	0.503918	0.664009	0.456059
81	0.552035	1.13229	-0.251353	-0.644422	1.82117	0.0308087	-0.835227	0.382027	-0.807647	81	0.32908	0.231614	-1.01308	0.0354884	-0.311881	0.202428	-0.200775	0.368531	0.135861	81	-0.252867	0.831017	0.614259	-0.450674	0.550981	0.431892
82	0.100271	0.503765	-0.545717	-0.933703	0.628302	0.125643	-0.794337	-0.337915	-0.784204	82	-0.0981999	0.447446	-0.824306	0.665565	-0.197503	0.250189	-0.121321	0.285237	0.118005	82	-0.390438	1.04188	-0.0616045	-0.0133999	0.551602	0.453515
83	0.540867	0.79862	-0.412548	-0.43104	1.26716	0.356051	-0.491701	0.281024	-0.173523	83	-0.221248	0.218423	-0.925634	0.252844	0.101202	0.377746	-0.222137	0.35562	0.30694	83	0.344378	1.12775	0.388971	-0.448698	0.564023	0.486585
84	0.434766	0.738121	-0.937219	-0.781906	1.61887	-0.544534	-1.00318	0.954575	-0.876216	84	0.140222	0.316765	-1.34042	0.293295	0.147682	0.0888776	-0.117997	0.348953	0.089788	84	-0.271386	0.628739	0.350776	0.104195	0.547255	0.310424
85	0.558178	0.762899	-0.584699	-0.748078	1.24944	0.409014	-0.504407	0.726143	-1.21614	85	0.0149501	0.544823	-0.941818	-0.490767	-0.165812	0.660713	-0.133241	0.333177	0.1614	85	-0.418878	0.297176	0.405155	-0.652265	0.686988	0.498668
86	0.0667652	0.258878	-0.67088	-0.185998	1.63798	-0.606549	-0.428402	0.22054	-0.463039	86	0.386259	0.111496	-0.888765	0.394809	0.0343104	-0.107938	0.00348784	0.198392	0.208169	86	0.131407	0.282864	-0.198201	-0.246119	0.759649	0.618864
87	0.557061	1.01728	-0.33627	-1.19848	1.53286	-0.243282	-0.552228	-0.671461	-0.412052	87	0.0807397	0.386217	-0.848513	0.563763	-0.112637	0.136314	-0.233013	0.193868	0.195493	87	0.192917	0.972706	-0.155474	-0.0262463	0.803121	0.638579
88	0.183476	0.635294	-1.26361	-1.17658	1.56782	-0.151843	-0.357479	0.0167712	-0.995774	88	-0.179069	-0.0474839	-1.08724	0.583572	0.0814401	0.419054	-0.0875601	0.319295	0.0908321	88	-0.324298	0.50327	0.460182	0.0765255	0.560918	0.365753
89	0.310796	0.48704	-0.869791	-1.26267	1.1674	-0.431366	-0.351704	0.0232308	-0.398572	89	0.0919963	-0.0118416	-0.984473	0.4401	0.109198	0.572097	-0.13839	0.430029	0.244952	89	0.333796	0.625877	0.362428	-0.0544098	0.621779	0.482133
90	0.452078	1.17215	-0.809949	-0.628159	1.05017	-0.384063	0.123041	-0.290937	-1.2595	90	0.223294	0.350346	-0.623694	0.63114	0.0142234	0.657568	-0.203897	0.332691	0.0764293	90	-0.336203	0.727493	0.410334	0.159039	0.636684	0.494216
91	0.424715	0.477129	-0.867052	-0.948882	1.40187	-0.504473	0.357063	0.901137	-0.950061	91	-0.250451	0.24249	-0.568625	0.181909	-0.362781	0.17785	-0.233088	0.229982	0.0341179	91	-0.355384	1.02852	0.443998	0.0814664	0.595696	0.480225
92	-0.169448	0.890917	-1.50783	-0.744825	1.12149	0.0158706	0.241323	0.0890004	-0.855118	92	0.66509	0.803423	-0.910886	0.232425	-0.332683	0.0149178	-0.369163	0.0330263	-0.0172421	92	-0.318345	0.801439	-0.283655	-0.622125	-0.0160227	-0.0336295
93	0.163372	0.0749032	-0.735147	-1.15012	1.14829	-0.288323	-0.12184	1.29752	-1.75121	93	-0.18105	0.21518	-0.821323	0.154055	0.609097	0.646251	-0.21223	0.236001	-0.0185137	93	-0.248237	0.888265	0.395445	0.523188	0.307536	0.173693
94	-0.106346	0.805641	-0.729668	-0.862141	0.974417	-0.398774	-0.497015	0.429006	-0.693364	94	-0.508379	0.572399	-0.538702	0.43635	0.0720466	0.155023	-0.122315	0.0927549	-0.0408674	94	-0.129185	0.974138	-0.132816	0.203508	0.432364	0.384831
95	-0.418505	0.159973	-0.603452	-0.431474	0.647181	0.235189	0.0680583	0.225825	-0.837536	95	-0.696734	0.0806525	-0.495991	-0.35393	-0.21941	-0.167664	-0.160758	0.130763	0.00469669	95	-0.24956	0.681217	-0.146411	0.13977	0.390755	0.28435
96	0.0645315	0.0214245	-0.0699309	-0.502168	1.01824	0.112289	-0.208934	0.700893	-1.04032	96	-0.00997748	0.49347	-1.00864	0.358492	-0.0183448	0.342371	-0.0701007	0.200324	-0.0176838	96	-0.30181	0.639712	-0.0667836	0.278116	0.469626	0.546365
97	-0.252653	-0.0401069	-0.551617	-0.471809	0.762553	0.00591186	-0.247283	-0.135908	-0.734388	97	-0.0787246	0.219147	-0.484075	0.148862	-0.141435	0.530594	-0.0848663	0.150826	0.0720657	97	-0.213183	1.05429	-0.152238	-0.501072	0.423669	0.332683
98	0.746367	0.222331	-0.890441	-0.658518	0.799612	-0.329063	-0.304345	0.918167	-0.444871	98	-0.383489	0.287525	-0.282303	0.345478	0.101332	0.742584	-0.042848	0.345053	-0.0344558	98	-0.160932	0.424077	0.467951	-0.163605	0.50813	0.404546
99	0.452078	0.490344	-0.0709844	-0.354275	0.471677	-0.599986	-0.273157	0.305688	-0.78772	99	-0.0578711	0.180984	-0.498864	0.224733	-0.0793534	-0.0972379	-0.1417	0.30783	-0.209671	99	-0.379194	0.0724764	-0.243518	-0.369148	0.428638	0.391191
100	-0.0951778	0.120949	-0.544664	-0.620569	0.779334	0.385475	-0.945192	0.66331	-0.667577	100	0.00282835	-0.204209	-0.593646	0.0620929	0.0670411	-0.228589	-0.308049	0.487651	-0.0286733	100	-0.320991	-0.0410661	0.348186	0.476249	-0.0924098	-0.168453
101	0.349328	0.0476476	-0.578588	-1.0727	0.814528	0.0308087	-0.599356	1.0638	-0.692192	101	-0.423355	0.0174947	-0.583718	0.335606	-0.172248	-0.189874	-0.189459	0.243204	-0.0245773	101	-0.219135	0.844375	0.411629	-0.00154158	0.512477	0.325051
102	0.645292	-0.169984	-0.421187	-0.947364	0.743441	-0.090054	0.111028	0.372632	-0.709774	102	-0.450486	0.462409	-0.403957	0.82407	0.0229018	-0.374466	-0.1165	0.243678	-0.199418	102	-0.203262	0.580555	-0.314082	-0.0988783	0.467763	0.457331
103	0.00589696	0.769919	-0.522117	-0.668927	0.444174	-0.00631021	-0.258603	0.216429	-0.749626	103	-0.330143	0.0510269	-0.433714	0.845257	0.000962095	0.836906	-0.359458	0.149056	-0.0981036	103	-0.158948	0.541913	-0.184606	-0.112219	-0.331508	-0.319811
104	0.61067	0.109592	-0.768228	-0.185347	0.547426	0.591213	-0.445266	0.225825	-0.928376	104	-0.190506	0.276022	-0.327305	0.458243	-0.480866	0.302748	-0.149127	0.219664	-0.0656707	104	-0.304456	0.528555	-0.32444	0.211908	0.423048	0.429984
105	1.15122	0.0538421	-0.971565	-1.01134	0.686571	-0.767021	-0.283322	0.376742	-0.67461	105	-0.263308	0.465629	0.062831	0.514176	0.0860555	0.146009	-0.0629257	0.294596	-0.0944762	105	-0.174821	0.279525	-0.325735	-0.395336	1.08755	1.1289
106	0.475531	0.411468	-0.564892	-0.241946	0.77374	-0.570562	-0.242894	-0.0636791	-0.641204	106	-0.53731	-0.0298316	-0.442069	-0.12776	-0.632656	-0.0519087	-0.078887	0.177581	-0.137042	106	-0.24493	0.561473	-0.263587	0.151628	0.422427	0.456059
107	0.470506	-0.395668	-1.22821	-0.233272	0.252354	-0.166329	-0.357479	-0.0266837	-0.460695	107	-0.249204	-0.103648	0.352454	0.211911	-0.445015	0.194419	-0.0879629	0.0498121	-0.22825	107	-0.190695	0.45938	-0.432552	-0.51046	0.367155	0.442068
108	0.211955	-0.0409329	-0.122819	-0.315892	-0.018245	-0.150033	-0.263916	-0.0307943	-0.571462	108	-0.408688	-0.242721	0.0469235	0.422054	-0.423172	-0.380367	-0.120477	0.126887	-0.26245	108	-0.236332	0.0514853	-0.437731	0.0251396	0.257853	0.310424
109	0.161139	-0.298209	-0.17929	-1.13603	0.685872	-0.0604042	0.0689823	0.567004	-0.775413	109	-0.312921	0.287188	-0.107002	0.279448	0.0487093	-0.342268	-0.305556	0.111759	-0.25905	109	-0.355384	0.407856	0.203173	0.0542912	0.322441	0.34413
110	0.158347	-0.441713	-0.243136	-0.129183	0.000867035	0.241979	0.0343295	-0.151176	-0.617761	110	-0.524444	0.476215	-0.502592	-0.116606	-0.261241	0.332514	-0.088844	0.182092	-0.158726	110	-0.420862	0.105871	-0.441616	-0.423993	0.390755	0.392463
111	-0.579331	-1.20652	-0.0320028	-0.451208	0.27706	0.392265	-0.0885728	-0.260401	-0.107297	111	-0.183213	-0.302467	-0.607137	0.126585	-0.19968	0.246233	-0.264331	0.0642551	-0.201305	111	0.229294	0.764704	-0.320556	-0.111725	-0.240837	-0.312815
112	-0.166098	-0.251337	-0.470282	0.0408288	0.483796	-0.0434291	-0.234115	0.606349	0.0503548	112	-0.219438	-0.376259	-0.0908041	-0.0160216	-0.127718	-0.19584	-0.0458314	0.164334	-0.0963635	112	0.272285	0.300993	0.0905294	-0.0119176	0.33983	0.217574
113	-0.139852	-0.314108	0.40733	-0.0400568	0.209934	-0.0398077	-0.596584	0.287484	-0.173523	113	-0.0520164	0.172242	-0.13067	-0.0649033	-0.22123	0.0739949	-0.122957	0.136894	-0.0375612	113	0.11884	0.683125	0.328117	-0.0697267	0.388891	0.404546
114	-0.100204	0.361293	-0.789299	-0.109016	-0.0343271	0.59755	-0.0144156	0.334462	-0.0117682	114	0.0227865	-0.107205	-0.176722	0.102512	-0.109321	-0.760801	-0.20834	0.0138603	-0.120149	114	0.149265	-0.0687362	-0.0149933	0.194614	0.338588	0.3206
115	-0.120307	0.380909	-0.862416	0.244236	-0.166713	0.370084	0.0417221	0.430767	-0.00180509	115	-0.00608443	0.489792	-0.406429	-0.074263	-0.214762	0.267179	-0.000338865	0.109291	-0.147737	115	0.163816	0.549546	0.023202	0.0246455	0.183329	0.211851
116	0.789924	0.265898	-0.662662	-0.522769	0.445339	0.470577	-0.401142	0.199399	-0.667577	116	-0.568605	0.102754	-0.204643	-0.216388	-0.401005	0.0021426	-0.147806	0.240849	-0.287347	116	-0.447318	0.00759495	0.260143	-0.0440338	0.372124	0.501848
117	0.665954	0.294599	-0.233443	-0.211153	-0.238034	-0.0289437	-0.209396	-0.163508	-0.279015	117	-0.371025	0.0657493	-0.171226	0.234477	-0.47443	-0.199148	-0.218109	0.0262098	-0.239829	117	-0.435413	-0.437988	-0.325088	-0.232284	0.398828	0.472594
118	-0.923879	0.18661	-0.521275	0.333362	0.123697	0.26416	0.148915	0.360887	-0.444871	118	-0.176956	0.0266826	-0.267154	0.284416	-0.119917	0.0447806	-0.245613	0.272327	-0.17677	118	-0.425492	0.206533	0.343007	-0.957616	-0.258847	-0.220601
119	-0.500035	-0.0915208	-0.482714	-0.0463455	0.258414	0.526481	-0.00170954	0.273977	-0.502892	119	-0.080495	0.203315	-0.698275	-0.0234901	-0.106429	0.252491	-0.0721022	0.254893	-0.262464	119	-0.342156	0.795237	0.0982979	-0.0514452	0.175877	0.117093
120	-0.468205	0.276222	-0.857781	-0.170168	-0.0909641	-0.0221536	-0.693381	-0.122402	-0.430806	120	0.0761425	0.0933131	-0.252559	-0.0406067	0.312375	0.203595	-0.174378	0.0974653	-0.0996965	120	-0.36795	0.695052	-0.380115	0.149652	0.0665748	0.10183
121	-0.559786	0.309053	-0.247771	-0.157374	-0.372051	0.105725	0.127199	0.0813664	-0.251469	121	-0.693716	-0.224225	-0.461801	0.29509	0.0819276	0.946792	-0.333011	0.242132	-0.257123	121	-0.286598	0.458903	0.262732	-0.237719	0.192645	0.204219
122	0.600618	0.647476	-0.447315	-0.339312	-0.363195	0.0561581	-0.216788	-0.632116	-0.422015	122	-0.447649	0.0570437	-0.364229	0.428721	-0.307786	0.812685	-0.230898	-0.176765	-0.294401	122	-0.358691	0.462719	-0.451326	-0.00203567	0.15352	0.183868
123	0.113673	0.303065	0.000235997	-0.772799	-0.0939941	-0.0341494	-0.031049	0.0772558	-0.402089	123	-0.534554	-0.30477	-0.13785	0.378686	-0.430128	-0.410943	-0.312052	0.106388	-0.231958	123	-0.361998	0.0118886	0.229068	-0.237225	-0.378706	-0.449547
124	0.667629	0.28283	0.080517	-0.648976	-0.338955	-0.359392	0.0294781	-0.447139	0.217384	124	-0.415106	-0.241033	-0.449898	0.273775	0.204075	-0.192079	-0.199302	-0.154135	-0.087074	124	0.177044	0.280956	-0.347098	-0.245131	0.250401	0.0414136
125	0.372781	-0.00190789	0.10222	-0.535129	-0.369021	-0.262295	-0.0804871	0.0584645	-0.138359	125	-0.2013	0.645878	0.0570314	0.0226029	-0.253603	0.173991	-0.305393	0.110039	-0.144926	125	-0.360014	0.263781	0.163683	-0.349385	0.323683	0.25764
126	0.396235	-0.0206977	-0.0543382	-0.486771	-0.0257034	-0.187604	0.052811	0.222888	-0.310076	126	-0.194641	-0.367494	-0.357201	0.178704	-0.0998954	-0.0895858	-0.242705	0.136894	-0.286209	126	-0.307101	-0.140774	0.242663	-0.221414	0.213139	0.140623
127	0.354353	0.11145	-0.375252	0.0208785	0.150034	-0.328158	0.254953	0.316258	0.496352	127	-0.505854	0.175233	-0.100235	0.295475	0.0782547	0.326775	-0.173371	0.00743012	0.00271564	127	0.435651	0.256148	0.462125	-0.346914	0.143583	0.0445934
128	0.219215	-0.0570384	0.735619	-0.33259	-0.488588	-0.0382234	-0.105437	0.372632	-0.0949897	128	0.24128	0.125531	0.0559958	-0.170392	-0.14436	0.691192	-0.124984	0.00791612	-0.257538	128	-0.313054	-0.325877	0.306106	0.017234	0.134889	-0.0209103
129	0.249928	-0.236264	-0.178447	0.232309	0.00879155	-0.111782	-0.369954	0.23111	-0.314179	129	-0.31612	0.0277437	-0.320787	0.166523	0.0672037	0.376676	-0.131794	-0.0466907	-0.200877	129	-0.348108	0.14022	0.291864	-0.108266	0.185192	0.1915
130	0.215306	0.234513	-0.737886	-0.0825598	0.174507	0.233831	-0.44827	-0.361404	0.420163	130	0.0567074	0.301138	-0.0443379	-0.0907385	-0.112149	-0.250086	-0.143652	-0.180952	-0.12537	130	0.208791	0.289066	-0.182664	0.367053	0.206307	0.209943
131	0.471622	0.127143	-0.31246	0.408609	-0.0650929	-0.0610832	0.309935	-0.309141	0.312913	131	-0.144564	0.737974	-0.166793	0.0518357	0.252472	0.338253	-0.0506525	-0.199308	-0.0834064	131	0.140667	-0.281509	-0.283008	-0.292564	0.17774	0.0986499
132	0.170632	0.248967	-0.605348	0.0262998	-0.056003	0.374837	-0.111906	0.0191202	0.336941	132	0.459462	0.0494233	-0.177039	0.240631	-0.370192	-0.458056	-0.0935015	-0.149873	0.0284826	132	0.195563	0.125431	0.214826	-0.348396	0.0765114	0.0401417
133	0.0706741	0.468663	-0.204154	-0.200961	-0.137812	0.425536	-0.248438	-0.23926	0.312913	133	-0.142502	0.0951217	0.0633005	-0.0743271	-0.108444	-0.264645	-0.00697266	-0.03312	-0.0333314	133	0.290805	-0.28628	0.15203	0.0241514	0.088311	0.0140674
134	0.0963616	0.254542	-0.239975	-0.448389	-0.264837	0.165025	0.000369631	-0.138257	0.114236	134	-0.347365	-0.440756	-0.307531	0.0834726	-0.0690173	-0.568687	-0.0187675	-0.0872782	-0.0501971	134	0.0897388	0.159303	0.133904	0.332467	0.0802376	-0.0679713
135	-0.0410106	-0.534217	-0.443733	0.414898	-0.403749	0.302863	0.344588	-0.604517	0.297089	135	0.265856	0.325953	0.0622235	-0.464483	0.209145	0.027012	0.0404709	-0.184815	0.0579708	135	0.309324	-0.040112	-0.462979	-0.0810909	0.0634697	0.0935623
136	0.1818	-0.197239	-0.201836	0.178313	-0.0333948	-0.0300753	-0.387512	-0.670286	0.39672	136	0.22267	-0.187365	-0.220702	-0.344635	-0.0874142	0.0892019	0.0817087	-0.0731218	0.0291519	136	0.362897	-0.354024	-0.525775	-0.107772	0.136752	0.232837
137	0.053363	-0.183611	0.218322	0.49882	-0.206802	-0.0943543	0.053042	-0.0672024	-0.369855	137	0.440168	0.601856	0.169531	-0.058717	0.153435	-0.158941	0.0837102	-0.0669408	-0.0945297	137	-0.402343	0.900669	0.124193	-0.0153762	0.182087	0.159702
138	-0.319664	0.272919	0.101167	-0.116389	-0.340353	-0.758646	0.004759	0.288658	0.182806	138	-0.115603	-0.352494	-0.306468	-0.0596145	-0.273138	0.164102	-0.0483363	0.0966927	0.163368	138	0.276254	0.300516	0.173394	-0.124571	-0.0495585	-0.0170946
139	-0.616746	0.32041	0.18208	0.310592	-0.0657921	-0.117893	-0.2556	0.51709	-0.545089	139	0.0447868	-0.198807	-0.0447246	0.226848	0.109913	0.323078	-0.0641215	0.119385	-0.0276961	139	-0.498246	0.401177	0.2213	-0.228331	-0.578058	-0.626979
140	-0.32469	-0.0512569	0.576742	-0.444485	0.10645	-0.358713	-0.347083	0.342683	0.320532	140	-0.173818	-0.424659	0.27467	-0.0544218	-0.357711	0.256349	0.0171834	0.106861	0.185989	140	0.225326	-0.341143	0.136493	0.419428	0.112531	0.167333
141	0.440909	0.339612	0.907348	-0.432992	0.144674	-0.141206	-0.274081	-0.770115	0.0890352	141	0.157695	-0.0256837	-0.133873	-0.308606	0.202417	-0.0868946	0.0699139	-0.0208702	0.225008	141	0.191594	0.175046	-0.477869	0.275646	0.00136627	0.0566767
142	-0.272198	0.464946	0.115495	0.0963429	0.107848	0.229078	0.526862	0.301577	0.370347	142	0.205649	-0.00839308	0.233768	0.238291	0.103087	0.0457533	0.100301	-0.0513514	0.131925	142	0.306017	0.152624	0.149441	0.233154	-0.0414851	0.020427
143	-0.0616723	0.356131	0.434512	-0.0309491	-0.021275	-0.228797	0.0756819	-0.333804	-0.332347	143	0.20748	0.321817	0.06377	-0.112471	-0.223668	-0.0477908	0.113971	0.014608	0.055441	143	-0.449303	-0.158425	-0.55167	-0.129018	-0.0110544	0.162246
144	-0.382766	0.278494	-0.230704	-0.11834	0.135584	-0.0445607	-0.0654708	0.426657	-0.590216	144	-0.263187	0.25843	0.108151	-0.026984	0.219936	-0.0837494	0.121461	0.132532	-0.0921605	144	-0.387792	-0.564888	0.14232	-0.599397	-0.0203699	-0.00183156
145	-0.365455	-0.483422	0.702958	0.357649	0.107382	0.0715489	-0.44827	0.376742	-0.57029	145	-0.173506	-0.40234	0.25067	0.30913	-0.197308	0.242504	-0.0114539	0.0357554	-0.0385383	145	-0.355384	0.273323	0.122251	0.179297	-0.118493	-0.071787
146	-0.564812	-0.265172	0.216847	-0.194672	-0.0909641	-0.182625	0.296767	0.249314	-0.479449	146	0.0782147	-0.42232	-0.151521	-0.00874549	-0.378838	-0.618848	0.0707447	0.00992244	-0.053945	146	-0.395068	-0.604962	0.121604	0.089866	-0.256984	-0.24604
147	0.0148317	-0.458232	-0.485454	-0.137423	-0.0641606	0.440927	0.237857	-0.0225731	0.21504	147	-0.0883013	-0.554266	0.105472	-0.328416	0.243404	0.369996	-0.0152303	0.0734393	0.144883	147	0.337103	-0.108333	0.108009	0.43425	-0.220964	-0.168453
148	0.0768168	-0.826594	-0.310563	-0.116389	0.153531	-0.200505	0.237164	-0.114768	0.157605	148	0.164566	0.314004	0.137315	0.146426	0.0463366	-0.326251	0.151395	0.159973	0.181907	148	0.217389	-0.575861	-0.0085195	0.304303	-0.141472	-0.104857
149	-0.0186737	-0.163996	0.695162	0.254211	0.593108	0.639649	0.181258	0.158881	0.202732	149	0.0347071	-0.0371747	0.65942	-0.152634	0.366591	-0.391132	0.0993443	0.127373	0.0564315	149	0.191594	0.110165	-0.0227618	-0.0163644	-0.178113	-0.220601
150	-0.0443612	-4.95555e-05	-0.506103	0.343987	0.58262	0.000932498	0.485972	-0.192282	-0.618933	150	-0.113782	0.0875254	0.146926	0.317848	0.369939	0.0937737	0.175337	0.0655387	0.0805253	150	-0.322314	0.498499	-0.587276	-0.0573743	-0.185565	-0.0857781
151	0.584424	-0.0368032	0.386681	0.16747	0.410611	-0.151164	0.473497	-0.122402	0.34163	151	0.192813	0.441935	0.223274	-0.150422	-0.130643	0.454591	0.189322	-0.010552	-0.000122075	151	0.347685	0.0567331	-0.534838	0.07949	0.388891	0.437616
152	0.474415	0.850654	0.335267	0.352228	0.46515	0.44568	0.309011	0.0296903	-0.388609	152	-0.423637	-0.347671	0.360104	-0.0488124	0.0942463	-0.283678	0.0966505	0.0526907	-0.0247245	152	-0.455255	0.0381274	0.0821135	-0.453145	-0.273131	-0.297552
153	0.669863	0.570458	1.45857	0.824531	0.999356	0.3771	0.796693	0.213493	-0.206928	153	-0.296152	-0.0936647	-0.375166	0.393815	-0.0864066	0.506989	0.107489	-0.0206584	-0.0421658	153	-0.406973	-0.485218	-0.657193	0.187697	-0.291762	-0.285469
154	-0.418505	1.31111	1.39936	1.12812	0.322043	0.401997	0.321486	0.638059	0.579573	154	-0.338412	-0.577477	0.078421	-0.25543	-0.050458	-0.231734	0.0881789	0.0422354	0.066765	154	0.088416	-0.278647	-0.0227618	0.189673	-0.463167	-0.358604
155	0.243786	0.907436	1.4573	0.575802	0.757891	0.389096	0.527787	0.69091	-0.414982	155	-0.0713811	-0.611564	0.165567	0.307847	-0.10022	0.0431269	0.25668	0.150826	-0.0968454	155	0.152572	0.352516	0.11254	-0.526271	0.103216	0.142531
156	-0.349261	1.77383	0.998165	0.771836	0.491954	0.677673	0.736859	0.238744	0.639352	156	0.123684	-0.804426	0.240369	0.45555	-0.601778	0.322787	0.0740679	-0.0274749	0.226346	156	0.0414566	-0.074461	-0.678556	0.129888	-0.425905	-0.436827
157	-0.473231	1.17917	1.79613	1.29575	0.760222	0.809173	0.872005	0.753743	-0.444871	157	-0.475524	-0.239876	0.0737123	0.0182436	0.364316	-0.779607	0.143075	0.104768	0.167691	157	0.015662	0.533325	-0.0900892	0.15311	-0.450746	-0.350973
158	-0.25042	1.69826	2.1143	0.941631	1.23057	0.786992	0.857451	0.744347	0.0667647	158	-0.29237	-0.403027	0.294388	-0.204336	0.10884	-0.420476	0.155713	0.0715078	0.128004	158	-0.671533	0.29813	-0.0156407	-0.150264	-0.427147	-0.541125
159	-0.293418	1.88306	2.14212	0.748199	1.26483	1.08779	0.554816	0.0326264	0.117752	159	-0.497202	-0.646459	-0.047362	0.267492	0.153467	-0.437466	0.0687558	-0.0779569	0.0300487	159	-0.758177	0.090605	-0.790553	-0.403735	-0.34455	-0.39231
160	-0.281133	2.45233	2.0119	0.760343	1.46108	1.11812	0.404653	0.881172	-0.423187	160	-0.242866	-0.674155	0.234141	0.377147	-0.396682	-0.251902	-0.0398395	0.0306087	0.153021	160	-0.0795797	-0.19182	0.00442807	-0.537141	0.0460807	-0.132203
161	-0.252653	2.703	1.7483	1.21183	1.43754	1.04366	0.41297	0.396121	-0.453076	161	-0.296866	-0.355351	0.134829	-0.257064	0.0436063	-0.296258	-0.0813291	0.0718442	0.17749	161	-0.127201	-0.0410661	-0.785374	-0.189298	-0.121598	-0.323627
162	-0.298444	1.77218	2.85327	1.48159	1.29093	0.557942	0.862764	1.01506	-0.208101	162	0.315822	-0.27969	0.336091	-0.576318	0.167119	-0.553999	-0.119231	0.129143	0.251431	162	-0.0994217	0.173615	-0.0609572	-0.0129058	-0.124083	-0.394854
163	0.0483372	2.73996	2.33639	1.54188	1.76547	0.905139	0.574452	1.30574	-0.464212	163	-0.218271	-0.691952	0.0278813	-0.10699	0.318356	-0.625722	-0.176367	0.145605	0.390358	163	0.0229374	0.426939	-0.0661362	0.00438757	-0.0433482	-0.240316
164	-0.213005	2.80996	2.41583	1.60932	1.64101	1.21567	1.32457	0.501235	-0.101436	164	0.08924	-0.701611	0.20031	-0.268956	-0.0322562	-0.527055	-0.278128	-0.00184133	0.380212	164	0.101644	0.0381274	-0.590513	-0.528247	-0.103588	-0.38913
165	-0.202954	2.60987	3.41713	1.82357	1.99225	1.83832	1.14946	0.568766	0.115408	165	-0.335596	-0.441998	0.144136	0.0653303	-0.190839	-0.805709	-0.267088	0.0226084	0.385419	165	0.184319	-0.0291394	-0.667551	-0.17991	-0.0439692	-0.295009
166	-0.0460365	1.862	2.82356	1.98555	1.75358	1.95443	0.833887	0.832432	0.178703	166	0.0364072	-0.167626	0.103912	0.206334	0.336233	0.334784	-0.261386	0.0111437	0.394869	166	0.243184	0.285726	-0.655251	-0.0356342	-0.135261	-0.287377
167	-0.0270501	3.03832	2.33323	2.09094	2.52716	1.73465	1.21923	0.764313	0.134162	167	-0.319329	-0.461471	-0.147392	-0.0576272	-0.39951	0.128241	-0.236059	-0.0284843	0.439537	167	0.135375	-0.000515235	-0.547138	-0.131489	-0.0967571	-0.283561
168	-0.355403	2.88346	2.13706	1.59197	2.18174	1.58641	2.12367	1.18477	-0.26026	168	0.193276	-0.262701	0.158083	-0.398549	0.270089	-0.613919	-0.23913	0.0249262	0.325118	168	-0.606716	-0.113581	0.0393865	-0.497613	-0.0880626	-0.289921
169	0.00478011	3.52686	3.41102	1.89383	2.63344	1.83243	1.38394	1.395	0.121855	169	-0.209569	-0.492302	0.164463	0.0473162	0.341238	-0.171944	-0.232069	0.255529	0.403155	169	0.190933	-0.000992304	-0.0136985	0.0365038	-0.0576319	-0.169089
170	0.266122	4.19235	3.75406	1.65355	2.86418	1.80188	1.57546	0.898201	0.318187	170	-0.475836	-0.434944	0.00190725	0.107449	-0.115692	-0.449658	-0.15561	0.0277052	0.53195	170	0.250459	0.14356	-0.569149	-0.474885	0.438574	0.286258
171	-0.343118	3.78083	4.47848	1.9823	2.56421	2.01893	1.73833	1.65631	-0.26026	171	-0.00331805	-0.571509	0.602984	-0.0372732	0.649336	0.283067	-0.179351	0.147711	0.345557	171	-0.582905	-0.173214	0.0762871	0.318138	-0.19488	-0.312179
172	-0.148786	3.85021	4.21025	2.44485	3.27719	2.23893	2.43046	1.64985	0.389101	172	-0.423385	-0.326401	0.285371	-0.00762362	-0.0793534	-0.913163	-0.134513	0.0979513	0.520974	172	0.1281	-0.149838	0.317112	0.114077	-0.0365168	-0.274658
173	-0.197928	3.69308	4.1405	2.17205	3.38207	2.12848	2.14099	1.55355	0.543237	173	-0.027119	-0.216206	-0.0102582	-0.010829	-0.315847	-1.03184	-0.167229	0.262794	0.377575	173	0.153895	0.0495771	0.192815	-0.385948	-0.148303	-0.440007
174	0.0421945	3.92392	4.36596	2.95944	2.9115	1.7634	2.40643	1.61932	0.577229	174	-0.556644	-0.239128	0.702296	0.270473	-0.273398	-0.567001	-0.0935519	0.257871	0.548253	174	0.100321	0.238974	-0.0913839	0.26774	-0.118493	-0.350973
175	-0.219148	3.75791	3.23339	3.29837	3.57109	2.3324	2.11997	1.62049	0.259581	175	0.293409	-0.759933	0.544643	-0.155935	0.265506	-0.0395551	-0.129805	0.304939	0.552389	175	-0.371919	-0.0277082	0.164978	-0.229814	-0.0104334	-0.232685
176	-0.122541	4.14919	4.62999	3.33003	3.25388	2.85569	2.06568	1.63106	-0.045174	176	-0.286042	-0.202364	0.335083	0.129437	-0.258316	0.256738	-0.163427	0.221882	0.3821	176	-0.403005	-0.174169	0.023202	0.134335	-0.189291	-0.440643
177	-0.0879183	4.95963	4.19423	3.16826	3.74567	3.05939	2.63099	1.90589	0.854438	177	-0.57612	-0.328234	0.345522	0.32599	0.568013	-0.0808961	-0.0245453	0.233098	0.780223	177	0.301387	-0.323968	0.249137	-0.268353	-0.157618	-0.414569
178	0.454311	4.94497	3.80779	3.27517	3.67854	3.26468	2.69221	1.70858	0.38031	178	-0.120452	-0.040599	0.712791	0.203577	-0.22643	-0.545082	0.174506	0.348679	0.634442	178	-0.239639	-0.0529929	0.215473	-0.296516	0.547255	0.240469
179	0.0220912	5.09385	4.45488	3.10624	4.13304	2.48563	3.07847	1.68098	0.577229	179	-0.0117983	-0.156123	0.541964	-0.13462	0.440243	-0.345608	0.108483	0.398613	0.60806	179	-0.287921	0.062935	0.27309	-0.00203567	-0.039622	-0.21297
180	0.0818426	4.09799	5.27666	3.11687	3.8389	2.71604	2.85623	1.15306	0.594225	180	-0.340183	0.179417	0.903019	0.334772	-0.282271	-0.609931	0.0596171	0.318161	0.672992	180	-0.287259	0.141651	-0.303724	0.216849	-0.0135385	-0.170361
181	0.138802	4.77194	4.09604	3.34283	4.0757	3.16599	2.57346	1.48308	0.597155	181	-0.361368	-0.571376	0.815085	0.199795	0.497806	-0.469274	0.0241445	0.397965	0.653838	181	-0.189372	0.33391	-0.358104	-0.876584	-0.0979992	-0.210426
182	0.372781	4.51343	4.41042	3.94199	4.0482	2.8661	3.1882	1.91	0.561991	182	-0.371206	-0.045205	0.472575	0.61726	0.895093	0.00185078	-0.152413	0.41247	0.797276	182	-0.188711	0.198423	0.359839	0.0513266	-0.0694316	-0.370688
183	-0.00750522	4.49505	5.11778	3.40355	4.42601	3.04943	3.14408	1.20708	0.743672	183	-0.403437	-0.219763	0.86557	-0.250269	0.162568	-0.0308005	-0.0940554	0.414078	0.77586	183	-0.128523	-0.741881	-0.408599	-0.601867	-0.0601161	-0.115032
184	0.211955	5.59085	4.71848	3.42849	4.41366	3.72549	3.2716	1.83601	0.649315	184	-0.375472	-0.143921	0.492985	0.0181795	0.0722092	-0.26766	-0.156101	0.481744	0.697755	184	-0.141751	-0.177031	0.227126	-0.571233	-0.105452	-0.340162
185	-0.0655813	5.74509	5.8047	3.66529	4.56655	3.85631	3.44833	1.49483	0.615323	185	-0.138066	-0.608803	0.468833	0.0397195	0.117616	-0.323851	-0.252058	0.490567	0.846307	185	-0.303794	-0.375969	-0.350335	-0.116666	-0.0346537	-0.0953175
186	0.249928	5.40728	5.19996	3.09779	4.74043	3.19994	3.54906	1.44491	0.669241	186	-0.190275	-0.140014	1.06408	-0.0729808	0.205895	0.303397	-0.131127	0.407311	0.873225	186	-0.191356	-0.107856	-0.457153	-0.0662681	-0.0756419	-0.34207
187	0.0555967	5.67117	4.68456	3.34001	4.89099	3.82214	3.74427	2.03449	1.32095	187	-0.432479	0.281846	1.0372	-0.227703	1.03508	0.163097	-0.1757	0.583194	0.989679	187	0.168445	-0.755716	0.183105	-0.42844	-0.212269	-0.437463
188	0.0198576	5.37156	5.35757	3.80863	5.26228	4.11502	4.13862	1.51538	0.944106	188	-0.550307	0.0987993	1.11189	-0.197509	0.921031	-0.300182	-0.15843	0.310123	0.93085	188	-0.283291	0.181248	-0.469453	0.0192104	-0.100483	-0.370052
189	-0.0248164	6.07381	4.86725	3.73511	5.38651	3.76035	4.12961	1.29106	0.568438	189	-0.3329	0.229022	0.833547	0.107769	0.790465	0.157487	-0.139825	0.431973	0.893022	189	-0.352738	-0.504301	-0.446795	-0.202638	-0.0942729	-0.148738
190	-0.272198	5.75459	5.35757	4.12306	5.29538	3.74111	3.39173	1.54591	0.835684	190	-0.152079	0.0226553	1.32409	0.111776	0.576854	0.0939682	-0.134349	0.457793	1.02022	190	-0.280645	0.090605	-0.494053	-0.274282	-0.166934	-0.315995
191	0.204137	5.66064	5.38686	4.34425	5.34828	3.85066	3.635	2.14078	0.83334	191	-0.39884	-0.117454	1.09192	0.106808	0.826511	-0.403777	-0.165592	0.628094	1.00009	191	-0.154318	-0.118351	0.21871	-0.523306	-0.130914	-0.294373
192	0.111439	5.4205	5.17299	4.3384	5.42753	3.77959	3.47005	2.18717	1.3397	192	-0.277854	-0.0511736	1.21142	0.134245	0.395486	-0.0341078	-0.097215	0.698776	1.20178	192	0.487241	-0.154609	0.257553	-0.0835614	-0.104209	-0.208518
193	0.0505709	6.23053	5.40751	4.2883	5.61585	3.8364	3.69321	1.86654	1.46043	193	-0.143569	0.265436	1.35572	0.239317	0.619271	0.240234	-0.101205	0.776973	1.19208	193	0.4588	0.0386045	0.273737	-0.124571	-0.202954	-0.195799
194	-0.0259332	5.37177	4.95448	4.71485	5.26414	3.92489	3.63962	1.47897	0.898979	194	-0.222657	0.174594	0.929034	-0.14289	0.768331	-0.483509	-0.10828	0.686688	1.14515	194	-0.312393	0.236588	-0.356162	-0.587539	-0.20668	-0.347157
195	-0.112489	5.80806	5.19785	4.69468	5.95334	4.36421	5.01672	1.46546	0.978684	195	0.08924	0.205811	1.28116	0.279031	0.881994	-0.0413384	-0.193827	0.761907	1.17516	195	-0.247575	-0.166058	-0.40342	0.00241118	-0.281204	-0.439371
196	0.0606225	5.88033	5.30468	4.33991	5.7571	4.00728	4.04505	1.7074	0.850922	196	-0.400188	0.0553556	1.26762	0.190051	0.942093	-0.205341	-0.160897	0.779714	1.20616	196	-0.236332	-0.0620572	-0.296603	-0.725391	-0.250773	-0.36878
197	-0.105229	6.21359	5.80913	4.67018	5.34013	4.3117	4.07832	1.45666	0.923008	197	-0.481952	0.149924	1.35696	0.0969351	0.790498	-0.110013	-0.145426	0.705892	1.21842	197	-0.184081	-0.281986	-0.36393	-0.0934433	-0.296109	-0.419021
198	0.386184	7.03291	6.43304	4.9291	5.91232	4.73223	4.23865	1.65103	1.07949	198	-0.551685	-0.356774	1.42218	-0.271905	0.498326	0.304694	0.0311685	0.732697	1.24303	198	-0.129185	-0.0391579	-0.348393	-0.467473	0.480183	0.468778
199	0.632449	6.54851	5.75097	4.96683	5.93983	4.8635	3.62252	2.24589	1.1756	199	0.0809711	0.482425	1.65805	0.210597	0.866783	0.157098	-0.138277	1.05087	1.25106	199	-0.0326203	-0.0596718	0.239426	0.318632	-0.193638	-0.263847
200	0.739107	6.45848	5.93492	4.30673	6.56353	5.13488	4.81227	2.17014	1.61457	200	-0.490684	0.29236	1.08311	0.154535	0.837985	0.458677	-0.0866915	0.964396	1.29092	200	-0.104713	-0.675569	0.2336	-0.340491	-0.300456	-0.409481
201	0.763678	5.13142	6.95961	4.31302	5.79252	5.43432	4.62607	1.68274	1.21311	201	-0.744094	-0.0857669	1.4826	-0.188117	1.13926	0.392531	-0.149417	0.774007	1.29364	201	-0.0213765	-0.702761	-0.332209	0.0355156	-0.2427	-0.315995
202	1.1529	6.00154	5.70546	4.49648	6.64977	4.47511	4.25459	1.82544	1.88474	202	-0.0855449	0.106384	1.76055	0.169248	0.668123	0.760904	-0.148838	0.903795	1.38147	202	0.594387	-0.552008	-0.395004	0.34729	0.33424	0.239197
203	-0.0331927	6.00567	6.86332	4.9703	6.88471	4.91103	4.99732	1.72737	1.91815	203	-0.531154	0.714607	1.84141	0.024494	1.52517	-0.0883536	-0.0990402	0.978053	1.43149	203	0.54346	-0.429401	-0.384646	-0.257977	-0.303561	-0.372596
204	-0.272198	5.84647	5.36853	5.03037	6.69242	5.00858	4.70369	1.50363	1.31509	204	-0.412591	0.253933	1.73147	-0.463842	1.39265	-0.471771	-0.116663	1.09589	1.21343	204	-0.0729657	-0.520044	-0.413131	-0.00697663	-0.394853	-0.445095
205	0.326991	6.3955	6.79989	5.34068	7.30377	5.33858	4.71385	2.19891	1.37955	205	-0.330093	-0.0962932	1.6536	1.02601	1.65096	0.806914	-0.0529813	1.16468	1.1521	205	-0.192679	-0.536741	0.408392	0.219319	0.172151	0.180053
206	0.180684	6.64514	6.30051	5.16438	6.34234	5.65432	5.01603	2.17542	1.30102	206	0.0602986	0.402808	1.65696	0.838302	0.878549	-0.0446457	0.0343281	1.16133	1.39047	206	-0.274693	-0.0420203	0.359839	-0.948228	0.115015	0.021063
207	0.256071	6.51382	6.2335	5.29775	7.01033	5.45627	4.71547	1.23703	1.16681	207	-0.440477	0.475094	2.24189	0.218771	1.02959	-0.302516	0.114248	1.07696	1.43428	207	-0.134476	-0.281986	-0.334151	-0.426464	0.164077	0.0261506
208	1.07863	6.64204	6.99501	5.23768	6.55421	5.83108	4.66511	1.459	1.3819	208	-0.553838	0.437559	2.06199	-0.0277853	1.88553	0.545639	0.14923	1.09826	1.44175	208	-0.129185	-0.654577	-0.233807	0.350748	0.174014	-0.00628327
209	0.54701	6.42297	6.44927	5.68916	7.20169	6.17285	5.35747	1.65103	1.57471	209	-0.336974	0.339759	2.11698	0.463179	1.04623	-0.0519087	0.0433032	0.976982	1.50558	209	0.058653	-0.1756	-0.304371	-0.244142	-0.332129	-0.387859
210	0.563204	6.90427	6.41661	5.95676	7.47648	6.3761	4.85686	2.31283	1.91932	210	-0.399071	0.916186	2.16433	0.523119	1.40933	0.0901097	-0.190629	1.09121	1.68321	210	0.672433	-0.0482222	-0.195612	-0.83508	-0.271268	-0.460358
211	-0.205746	6.69511	6.70992	5.75075	7.54874	6.4913	5.19923	2.23297	1.38483	211	0.0983942	0.983263	2.15886	0.217521	1.34409	0.568174	-0.0355219	0.99373	1.71411	211	0.0275672	0.241359	-0.429315	-0.30294	-0.295488	-0.340798
212	1.11828	6.9943	6.89134	5.93247	7.09308	5.86141	5.17405	2.82431	2.04533	212	0.271419	0.866111	2.06837	0.505938	1.66292	0.573297	0.0923329	1.19047	1.81584	212	0.722699	0.103009	0.447235	0.316162	0.180845	0.179417
213	0.932322	6.92678	7.20488	5.74923	7.55293	5.50833	5.11005	1.64281	1.73647	213	0.066103	0.864519	1.97186	-0.337359	1.86561	0.104247	-0.0519868	0.981443	1.72243	213	0.159847	-0.177508	-0.973761	0.292939	0.19575	0.209943
214	1.35561	6.67012	7.01713	6.21308	7.46949	5.94176	5.58711	2.87951	1.54893	214	0.25644	0.718152	1.83316	0.00571066	1.40786	0.867742	-0.0200892	1.18838	1.59295	214	0.0315356	0.498976	0.493846	-0.129018	0.0647117	-0.107401
215	0.49005	7.05459	8.3029	5.83792	7.62495	5.60113	5.51642	2.23415	1.57589	215	0.268149	1.19369	2.08264	0.33208	1.39902	1.01294	-0.0425082	0.938338	1.72383	215	0.0857704	0.178386	-0.356162	-0.0642917	-0.488008	-0.594545
216	-0.304587	6.90014	6.91473	5.70326	8.25145	6.2489	5.57879	2.17014	1.61105	216	-0.255169	1.40907	2.40311	-0.116894	1.69353	0.855323	-0.0317455	1.09697	1.70864	216	0.0778336	0.252332	-0.274592	-0.0652799	-0.420316	-0.566563
217	0.468272	7.21296	7.41875	6.50604	7.46646	6.87992	5.68645	1.99925	1.85134	217	0.418349	1.12328	2.21082	0.0947554	1.82124	1.11553	0.0541917	1.3188	1.74368	217	0.125454	-0.240481	0.562468	0.0508325	0.247917	0.2481
218	1.07975	7.01887	7.40548	6.85084	7.69511	5.88291	5.8075	2.77263	2.21939	218	-0.0718438	1.0941	2.51568	0.210693	1.62261	0.283391	0.0675852	1.26328	1.92364	218	0.690952	0.0634121	0.464067	-0.156193	0.194508	0.113277
219	1.16239	7.46095	6.82202	6.39393	7.45993	5.89695	5.82783	2.12375	2.0928	219	-0.190999	0.599034	2.05042	0.0678304	1.70156	0.60384	0.174871	1.09553	1.99845	219	0.69492	0.43648	-0.180075	-0.0539157	0.328651	0.208671
220	0.702252	7.53652	7.65643	7.13405	8.58801	6.45848	5.83776	2.27349	2.07756	220	0.352438	0.66376	2.7131	0.616106	1.38888	0.59113	-0.0504889	1.14862	1.92461	220	0.638701	0.0576872	-0.040241	-0.572716	-0.384296	-0.462266
221	0.572139	7.30278	7.5083	6.11419	8.35237	6.8256	6.06555	2.19245	1.50907	221	0.0173443	1.13553	2.04669	0.295315	1.44671	0.590028	0.148399	1.20353	1.94974	221	-0.0584149	-0.0611031	0.0672238	-0.101843	-0.370633	-0.366236
222	0.474415	7.1473	7.29485	6.67909	8.07525	6.50443	4.98022	2.73329	2.21353	222	-0.117927	1.13087	2.81869	0.410836	1.90156	0.189782	0.237357	1.24182	2.0679	222	0.63341	-0.322537	0.111246	-0.571728	0.298842	0.115185
223	0.682148	7.84191	7.41327	6.9044	7.99274	6.74389	5.8045	2.73505	2.34129	223	-0.596329	0.870259	2.70872	0.366602	1.63831	0.0779831	-0.00328442	1.22341	2.18978	223	0.673755	-0.549145	0.177925	-0.356302	-0.274994	-0.391674
224	0.538633	7.3385	7.27315	6.21243	8.68427	6.63683	6.2134	2.68514	2.16606	224	-0.0175624	1.39	2.81585	-0.00807237	1.63236	0.527449	0.0604479	1.29605	2.12653	224	0.676401	-0.168921	0.0957084	0.134829	0.15973	0.132356
225	0.683265	6.5134	7.45352	6.64375	8.23234	6.66716	6.02304	2.67163	2.24693	225	-0.125693	1.62653	2.71506	-0.313959	1.29872	0.124447	0.0410122	1.23068	2.18072	225	0.616214	0.00854908	0.148146	0.0394683	-0.501671	-0.633975
226	1.33215	7.78884	8.04709	6.01574	8.55119	7.1058	5.91931	3.23655	2.32019	226	0.0488106	1.09603	2.82395	0.552897	1.47898	0.241499	0.227375	1.44601	2.20923	226	0.587112	-0.526246	0.65828	0.240565	0.17774	0.021063
227	0.573256	7.33376	7.35764	6.47135	8.58894	7.2373	5.92763	2.6088	2.36649	227	0.157675	1.34452	2.89671	0.0398797	2.43948	0.246006	0.219042	1.27624	2.24614	227	0.757092	0.460334	0.0821135	-0.244142	0.336104	0.237925
228	1.2953	7.6825	8.07153	6.49932	8.416	6.70496	5.88697	2.56945	2.1473	228	-0.505391	1.52781	2.99202	0.216623	2.07694	0.960443	0.225386	1.27205	2.28009	228	0.620182	-0.0176897	0.119661	0.437709	0.278347	0.153342
229	0.559853	6.71514	7.43519	6.54898	8.42183	6.8222	5.66057	2.56534	2.1895	229	0.147093	1.75285	2.99924	0.499912	1.80593	0.490907	0.165733	1.37554	2.00976	229	0.73262	-0.160811	0.0704607	-0.130006	0.546634	0.31742
230	0.837949	7.14421	7.95859	6.7526	8.40831	6.652	6.03552	2.55477	2.29558	230	-0.256769	0.894097	3.16025	0.351376	2.04392	1.03495	0.203433	1.38547	2.41664	230	0.719392	-0.238096	0.276327	-0.0198231	-0.229037	-0.442551
231	1.38185	7.56398	7.45036	6.29852	8.59477	7.56141	5.91238	3.01457	2.46085	231	-0.0170795	1.62403	3.19919	-0.0218233	1.85683	0.558187	0.286135	1.64035	2.37003	231	0.764367	0.294314	0.912053	-0.0885023	0.387028	0.260183
232	1.08198	7.34862	8.11916	6.87079	8.32744	7.45617	5.77262	2.57826	2.32136	232	0.211192	1.58844	3.24053	0.22438	2.0772	0.912974	0.292731	1.46469	2.4533	232	0.718069	0.0896509	0.171452	-0.0217995	0.530487	0.427441
233	1.35561	6.81528	7.35575	6.5531	8.4188	7.39075	5.32074	2.866	2.40634	233	0.210729	1.00675	3.1302	0.524049	2.50208	1.04617	0.237811	1.59383	2.52385	233	1.07589	-0.0315248	0.365018	-0.0425515	0.529866	0.519019
234	0.825663	6.87661	8.29426	6.9842	8.67285	7.16555	6.7325	2.6364	1.82379	234	-0.0736847	1.66905	3.04746	0.580078	1.92203	1.00927	0.146801	1.63356	2.33462	234	0.267656	-0.0563324	0.274385	0.0715845	-0.152029	-0.249856
235	1.28301	7.43638	8.14781	7.24117	8.38267	7.30973	6.22149	2.69806	2.54172	235	-0.33972	1.50503	3.10315	0.898723	1.6582	1.50015	0.209425	1.60452	2.54693	235	0.994535	-0.978985	0.264027	0.0730668	0.458447	0.439524
236	0.884298	7.54953	7.34985	6.96859	8.77354	7.43942	6.17413	2.351	1.93456	236	-0.172128	1.47672	3.15155	-0.220299	2.47998	1.04092	0.059466	1.59914	2.49399	236	0.325859	-0.252408	0.177278	0.18325	-0.113525	-0.213606
237	0.866428	7.4308	8.26665	6.77516	8.61225	8.0211	6.28779	3.04217	2.50539	237	-0.339811	1.07283	3.17534	0.203802	2.5864	1.18887	0.0931889	1.58378	2.46778	237	1.07655	-0.0668279	0.559231	0.10963	-0.235869	-0.177992
238	1.29139	7.86668	8.50897	7.13752	8.87073	7.5338	6.22102	2.46258	1.82848	238	-0.0734533	1.52482	3.29426	0.479526	1.86509	0.589217	0.213252	1.52144	2.53415	238	0.351653	-0.401731	0.0342075	0.49453	0.430501	0.382924
239	0.968061	7.47127	8.13201	6.56459	9.12408	6.79866	6.19977	2.56123	2.40341	239	0.0851156	1.31192	2.88499	-0.0471456	1.79741	0.763595	0.247604	1.48001	2.55033	239	1.09507	0.0610267	0.0257916	0.146687	0.42988	0.322507
240	1.35952	8.03765	8.49801	6.75629	8.90453	7.64742	5.99185	2.95174	1.89822	240	-0.270892	1.61456	3.17177	0.326791	2.33229	0.742908	0.370222	1.50514	2.35722	240	0.285513	-0.521952	0.568942	0.262305	0.38206	0.238561
241	1.44105	7.81899	8.03529	6.25558	8.67984	7.16057	5.90384	2.49018	2.63784	241	-0.00492758	2.05338	3.11757	0.555044	2.59335	1.6706	0.34229	1.54544	2.48573	241	1.00181	-0.504301	-0.0512465	0.17238	0.275863	0.241741
242	1.1797	7.72545	8.33956	6.73591	9.0185	7.61845	6.46105	2.95409	1.958	242	-0.0281249	2.15227	3.74052	0.777688	1.70657	0.8312	0.221698	1.7921	2.50807	242	0.337103	-0.497622	0.5793	-0.0109294	0.242327	0.0477732
243	1.09427	7.69551	8.2656	6.28269	9.08982	7.276	6.72211	2.93471	2.64487	243	0.0295767	2.13231	3.67671	0.530524	2.45632	1.54515	0.287671	1.72908	2.65491	243	1.062	-0.269582	0.546931	0.329502	0.308778	0.18832
244	1.23331	7.51339	7.42781	6.88488	8.09343	7.34594	6.53313	2.27643	2.89395	244	0.376823	1.92422	3.52369	0.288359	2.28357	1.34081	0.278104	1.49823	2.74372	244	1.03819	-0.755239	-0.143822	0.417945	0.372124	0.299613
245	1.16909	7.82786	8.364	6.57218	8.92807	7.33168	6.61653	2.13725	2.36532	245	-0.0640577	1.75567	3.60474	-0.0167909	2.20949	1.03959	0.35309	1.64536	2.6043	245	0.402581	-0.186095	-0.0900892	-0.0573743	0.301326	0.0935623
246	0.677122	8.38867	7.86714	6.80703	9.01873	8.00774	6.80989	3.17078	2.29909	246	-0.161334	2.14265	3.63149	0.500425	2.02783	-0.0848842	0.19729	1.80953	2.66926	246	0.427053	-1.01333	0.531394	0.520717	-0.342687	-0.530949
247	1.2294	8.39528	8.47125	6.60905	9.07304	7.881	6.29172	2.27525	2.25455	247	0.0236315	1.90403	3.66587	0.469045	2.20263	1.29289	0.465147	1.68055	2.70097	247	0.481949	-0.0735069	-0.0370042	-0.15817	0.413733	0.325051
248	0.907752	7.32013	8.63118	6.82352	9.2595	7.73592	7.35071	2.63346	2.94963	248	-0.0997792	1.84167	4.03038	0.101775	2.44277	1.65552	0.200941	1.65041	2.87075	248	1.10367	-0.259564	-0.0331199	-0.364208	-0.203575	-0.497879
249	0.830689	8.28832	7.77317	6.68191	9.63988	7.89865	6.74428	3.041	2.84882	249	0.0729335	2.14098	3.6061	0.274159	1.85254	1.35015	0.286249	1.89039	2.92866	249	1.18568	-0.784817	0.574121	-0.432887	-0.247668	-0.40185
250	0.2812	8.02031	8.51487	7.52677	8.96862	7.924	6.9693	2.62583	2.20181	250	0.21923	2.64049	3.60656	0.470391	2.93542	1.15794	0.126282	1.67107	2.82947	250	0.438297	-0.255747	0.123546	-0.00747072	-0.68736	-0.978028
251	1.42988	8.12313	8.85096	7.28237	9.19377	8.17297	7.00788	2.52835	3.0182	251	0.11634	2.2702	4.17012	0.894972	2.3176	1.17188	0.404977	1.72849	2.98384	251	1.15988	-0.789111	0.124193	0.341855	0.516824	0.399458
252	0.81617	8.91643	8.48832	7.42398	9.62915	8.34634	6.96052	2.51014	2.36239	252	0.0201006	2.52763	4.20401	0.660244	2.57869	1.264	0.383364	1.69168	2.81384	252	0.472028	-0.125507	0.109951	0.356677	-0.168176	-0.380863
253	0.894908	8.53837	9.27111	7.67184	9.51821	8.24336	6.75907	2.61232	2.8875	253	-0.104155	2.47266	3.86589	-0.0832059	2.61065	1.39791	0.303242	1.80583	2.8602	253	1.0448	-0.730432	0.109951	-0.437334	-0.232142	-0.443187
254	0.696109	7.57761	9.03933	7.04514	9.78834	8.59033	6.7258	2.60351	2.92501	254	-0.0906351	2.2462	4.09058	0.372019	2.10613	1.71642	0.278822	1.87184	3.00983	254	1.08779	-0.166535	0.0510393	0.00339938	-0.202954	-0.603449
255	0.552035	7.36948	8.6729	6.92327	9.18958	7.99077	7.28625	2.78614	2.96135	255	-0.279685	2.63486	4.76505	0.153638	2.54184	1.68921	0.329148	1.87079	2.9013	255	1.04612	-0.344482	0.160446	-0.0484806	-0.358212	-0.696299
256	0.549802	7.30588	9.52776	7.0241	9.31637	7.62999	7.40523	2.51014	2.81893	256	0.140916	2.13322	3.98435	0.0927361	2.2756	1.68438	0.258492	1.92721	2.99566	256	1.01636	-0.52386	0.161094	0.204002	-0.329024	-0.656233
257	0.575489	7.50369	8.82061	6.65784	9.49956	8.13653	8.0202	2.34983	2.77205	257	0.103887	2.74824	4.41495	-0.279534	2.31545	1.59949	0.389507	1.89297	2.97324	257	1.07787	-0.341143	0.172746	0.233648	-0.317224	-0.546212
258	1.03284	7.82043	9.60846	6.64505	9.8564	8.48259	7.29988	2.56241	2.95607	258	-0.138368	2.8889	4.30689	-0.0955145	3.15358	2.1272	0.597206	1.83387	3.22046	258	1.16848	-0.401731	0.247842	0.357172	0.315609	0.112005
259	0.544776	8.40705	9.29809	6.93953	9.83286	8.2592	7.53414	2.57063	2.37118	259	0.270674	2.76135	4.43995	0.92318	2.64013	1.96625	0.468659	1.89932	3.04017	259	0.608938	-0.35307	0.0633395	0.308256	-0.201091	-0.403122
260	0.61067	8.03538	9.04692	7.12212	9.65922	8.2927	7.58935	2.43263	3.00237	260	-0.252514	2.45796	4.2095	0.346408	2.18476	2.14322	0.487617	1.87353	3.20778	260	1.1493	-0.428447	0.012844	-0.0524334	-0.373738	-0.628887
261	0.347652	8.15824	9.13752	7.39665	10.0114	8.31103	7.52882	2.51778	3.09556	261	0.133965	2.72736	3.93441	0.280858	3.00039	1.48938	0.54756	1.88814	3.21721	261	1.22867	-0.298207	0.0283811	-0.74219	-0.39299	-0.70075
262	0.417455	8.68394	7.91182	7.47602	9.89439	8.71051	7.22573	2.47491	3.28954	262	0.367367	2.788	4.48598	0.586136	2.45144	0.819332	0.670694	1.90548	3.30788	262	1.24851	-0.312996	0.0387391	0.542457	-0.414105	-0.696299
263	0.608995	8.10558	8.777	7.31273	10.5924	8.40541	7.81968	2.4062	2.48839	263	0.277797	3.05343	4.21924	0.672136	3.13547	2.25557	0.63828	1.99774	3.29969	263	0.552719	-0.321583	-0.165832	-0.589515	-0.378706	-0.694391
264	0.385067	8.23856	9.47171	7.18262	10.3205	8.75578	7.88644	2.98815	2.55403	264	0.16181	2.57487	4.1518	-0.22328	3.24963	1.97143	0.532178	2.02072	3.35866	264	0.63341	-0.321106	0.58189	0.22426	-0.320329	-0.612352
265	0.417455	8.5138	9.50016	7.01391	10.1449	8.52831	7.50826	2.3604	2.70231	265	0.382979	2.80445	4.91982	0.382917	2.63564	1.94536	0.62597	1.89218	3.39293	265	0.585789	-0.716597	0.0885873	0.0271159	-0.372496	-0.705838
266	0.478882	8.67196	8.77299	7.51896	10.317	9.12516	7.80905	2.87423	3.08325	266	1.0511	2.71103	4.78884	0.101807	3.05513	1.74933	0.613168	1.99242	3.52807	266	1.23661	-0.299638	0.198642	-0.303928	-0.391127	-0.646058
267	0.550919	9.07295	8.7496	7.19693	9.7098	8.56724	7.78549	2.77029	3.26962	267	0.107579	2.70922	4.13667	0.428369	2.4623	1.5946	0.459168	1.96425	3.56476	267	1.31399	-1.07488	0.236837	-0.0880082	-0.458199	-0.724917
268	0.424715	8.75042	9.26184	7.37692	10.0829	9.11226	8.14634	2.73329	2.78553	268	1.07773	2.79696	4.88512	0.527382	2.31834	1.6837	0.5623	2.0844	3.3966	268	0.605631	-0.239527	0.438172	0.192144	-0.419695	-0.614896
269	0.437	8.77148	9.26964	7.57859	10.395	9.2854	7.80651	2.73505	3.29189	269	0.693961	2.71064	4.50822	0.768778	3.06533	2.0202	0.520937	2.04715	3.73912	269	1.37881	-0.269582	0.458888	-0.31628	-0.400443	-0.597725
270	0.579398	7.62613	8.67923	7.40685	10.3752	8.21439	8.05855	2.82783	3.16764	270	0.488404	2.61207	4.60741	0.291372	2.50748	1.68237	0.663985	2.02335	3.64898	270	1.34772	-0.207563	0.0374444	0.506388	-0.499808	-0.815223
271	0.963035	7.33603	9.05893	7.0421	10.7449	8.17342	8.05809	2.86894	3.3417	271	0.253684	3.34128	4.50324	0.527158	3.40047	1.84822	0.885304	2.16309	3.86536	271	1.36823	-0.241435	0.414866	0.208943	0.252264	0.185776
272	0.729056	7.63728	9.10908	7.79523	10.7992	8.2128	7.67621	3.30995	3.46771	272	0.376139	2.79534	4.70286	0.0540474	2.83632	2.14659	0.612689	2.29268	3.82013	272	1.5144	-0.513365	0.996212	-0.357784	-0.444536	-0.586278
273	0.799976	8.21254	8.37032	7.84185	10.7831	8.31737	8.10452	2.51778	2.90509	273	-0.0226123	2.96281	4.77056	0.508695	2.77089	2.1948	0.721562	2.165	3.79702	273	0.823232	-1.15407	0.293159	0.422886	-0.484282	-0.724917
274	0.719563	8.3577	9.06672	7.42788	10.3265	8.36196	7.85826	2.77675	2.95138	274	0.299616	3.56015	5.03342	0.925487	2.8524	2.3033	0.53793	2.23051	3.80654	274	0.831169	-0.287234	0.302222	0.39917	-0.460062	-0.58755
275	0.208046	8.62881	9.04607	7.38668	10.1906	8.60006	8.30412	2.82431	3.26493	275	0.501722	2.72483	4.73209	0.633512	3.06364	2.45303	0.715431	2.25973	4.01767	275	1.42974	-0.106425	0.0672238	-0.0623153	-0.454473	-0.671496
276	0.606761	8.61766	8.73254	7.66707	9.96595	8.75827	7.8742	2.87246	3.36691	276	0.271922	3.21289	5.12178	0.50674	3.17503	2.19931	0.885204	2.26463	3.94441	276	1.36823	-0.557732	0.168215	-0.0983842	-0.496703	-0.609172
277	0.736874	8.40787	9.02311	7.17785	10.3741	8.8789	8.29165	3.45617	3.64529	277	0.822341	2.95382	5.02815	0.504817	3.29783	1.83583	0.75969	2.29249	3.99133	277	1.41915	-0.70944	0.80394	0.16398	-0.484903	-0.70711
278	0.414663	8.05912	9.85731	7.04514	10.3717	8.7087	7.69077	2.73505	2.78436	278	0.0442235	2.99999	5.35632	0.27557	3.12761	2.14941	0.865655	2.29659	3.98386	278	0.692275	-0.802469	0.179868	0.266752	-0.483661	-0.583098
279	0.408521	8.78222	8.83684	6.78513	10.1053	9.15345	8.01974	2.69395	3.58668	279	1.1386	2.88062	4.98164	0.629569	3.04573	2.76463	0.752377	2.48161	4.03986	279	1.41585	-0.519567	0.254316	-0.649795	-0.358212	-0.607264
280	0.647526	8.27448	10.1883	7.46258	9.97131	8.93956	8.26139	2.68103	3.6154	280	0.151338	3.32357	4.99182	0.0227952	3.34515	2.71538	0.906792	2.54753	4.01936	280	1.47405	-0.779093	0.222595	0.00735214	-0.414105	-0.520774
281	1.47455	8.84623	9.96562	7.54064	10.3365	8.90788	8.60306	3.28117	3.48764	281	0.422031	3.45679	4.80823	0.384488	2.99574	2.35492	1.05831	2.61945	4.14237	281	1.40857	-0.827754	0.812356	0.699086	0.0429755	-0.00628327
282	0.735199	8.39651	9.70982	7.24768	10.365	9.07152	8.70448	2.59529	2.90977	282	0.382577	3.11854	4.98969	0.17303	3.15894	2.69375	0.938425	2.5958	3.97654	282	0.855641	-0.0835253	0.203821	0.580997	0.0305549	-0.345885
283	0.767587	8.9949	9.50922	7.42593	10.9136	9.15005	8.23875	2.75737	3.72734	283	0.287273	3.24842	5.00576	0.184089	2.94192	1.82416	0.757122	2.62179	4.07615	283	1.52432	-0.677477	0.209647	-0.0667622	-0.471241	-0.752263
284	0.881506	8.24372	9.28439	7.95917	10.3692	8.18474	8.93088	2.69688	3.67283	284	0.287896	3.28496	5.45727	1.01787	3.0313	1.72744	0.829175	2.57497	4.16463	284	1.46214	-0.567751	0.19152	-0.0153762	-0.100483	-0.527134
285	0.61793	8.7242	8.27803	7.06682	10.7064	8.64714	8.86689	3.43385	3.55855	285	-0.0667134	3.4469	5.3094	0.315476	2.91153	2.81119	0.772215	2.81501	4.19228	285	1.45355	-0.727569	0.741145	-0.0405751	-0.0520426	-0.326807
286	0.949633	8.33127	8.95484	7.71608	10.5046	8.61568	8.70979	2.65989	3.11138	286	0.0176863	3.30121	5.53765	0.749674	2.93691	2.55364	0.829503	2.64116	4.1559	286	0.904584	-1.00713	0.174689	0.18078	-0.0787471	-0.378319
287	0.969737	9.19663	9.25995	7.69201	10.8225	8.67181	8.48779	2.71744	3.62302	287	0.328477	3.67242	5.39915	0.574661	3.43496	2.12448	0.894103	2.82728	4.22494	287	1.4595	-0.443713	0.175983	0.115559	-0.130293	-0.523318
288	1.26179	9.43512	9.32295	7.17525	10.581	8.92643	8.9459	2.72683	3.5984	288	0.095658	3.80265	5.64937	0.0519319	3.02272	2.11728	1.03111	2.79161	4.17878	288	1.39733	-0.539127	0.113188	0.204496	0.471489	0.164154
289	0.908868	7.89724	8.85285	7.47342	10.4076	9.15843	8.75785	2.87129	3.61305	289	0.279436	3.29458	5.53462	0.802786	3.50328	2.75085	0.899415	2.73005	4.29905	289	1.42246	-0.931755	0.118367	-0.163111	-0.174386	-0.556388
290	0.875363	8.29658	9.17608	7.87633	10.6234	9.08894	8.9891	2.70217	3.56207	290	0.394699	3.39329	5.57634	0.0595606	3.08288	2.3472	0.825512	2.89222	4.31511	290	1.36161	-0.449438	0.0717554	0.476249	-0.304182	-0.661957
291	0.974204	8.66453	9.75027	7.45499	10.5757	9.35738	9.33378	2.73623	3.72909	291	0.0448975	3.48138	5.25747	0.0862292	3.54476	2.26244	0.781669	2.87005	4.28748	291	1.39733	-0.536741	0.0588079	0.319126	-0.307909	-0.598997
292	0.705602	8.68662	9.71635	8.27425	10.4883	9.19532	9.15635	2.69688	3.4091	292	0.556155	3.63974	5.98216	0.754097	3.43785	2.29467	0.903003	2.85952	4.18234	292	1.33185	-0.456594	0.135199	-0.00203567	-0.184323	-0.607264
293	1.46618	8.65234	9.64154	8.03073	10.5596	9.11384	9.19193	2.62289	3.68397	293	0.503332	3.44184	5.6755	0.0613556	3.28684	2.65682	0.976743	2.97428	4.35674	293	1.48992	-0.752854	0.0885873	0.608172	0.43609	0.0337821
294	0.668746	8.38103	9.79347	7.95808	10.6183	9.23402	8.62339	2.40503	3.65525	294	-0.153296	3.32817	5.52508	0.398046	3.84977	2.68136	0.76747	2.94508	4.47532	294	1.46744	-0.51909	0.181162	-0.0717031	-0.184323	-0.373232
295	0.686057	8.47456	9.39923	7.69981	10.9733	9.34742	9.52899	2.7744	3.54976	295	0.434022	3.83142	5.81418	0.715761	3.31177	2.227	0.918134	3.02755	4.46066	295	1.55011	-0.837772	0.151383	0.0572558	-0.137124	-0.402486
296	0.760328	8.29864	9.27512	8.0702	10.8031	9.63215	8.98448	2.8384	3.71737	296	0.489782	3.55299	5.96582	0.497476	3.3707	2.78035	0.992087	3.08293	4.44667	296	1.47074	-1.20559	0.0872925	0.0453975	-0.156376	-0.45209
297	0.860285	8.80783	9.49089	8.0522	10.8768	9.51174	9.16375	3.20895	3.8633	297	0.214582	3.5847	6.20032	0.674284	3.38933	2.74495	0.979424	3.26737	4.47757	297	1.61559	-0.849222	0.798114	-0.0954197	-0.229658	-0.516958
298	0.744133	8.31785	9.34318	8.21614	10.863	9.27635	9.32592	3.49023	3.27079	298	0.263693	3.58405	6.14764	0.176973	3.18826	2.5314	1.01409	3.24601	4.46221	298	0.988582	-0.962287	0.0581605	0.382865	-0.256363	-0.626343
299	0.608995	8.66928	9.19715	7.96003	10.8444	9.13398	9.6475	3.33931	3.5943	299	0.222449	3.80268	5.9503	0.488565	3.52184	2.87085	1.0786	3.26236	4.49955	299	1.06663	-1.0577	0.800056	-0.256495	-0.258847	-0.660049
300	0.823429	9.25527	8.83073	8.62447	10.7423	8.96989	9.40678	3.5284	3.97407	300	0.518029	3.60614	5.77005	0.770733	3.55698	2.849	1.02886	3.32668	4.63711	300	1.75647	-0.282463	0.692591	0.455002	-0.196744	-0.52777
301	0.734082	9.00935	10.1163	7.93119	10.4699	9.11837	9.23675	3.53075	3.31064	301	0.738977	3.95429	5.80946	0.481642	3.35845	2.41279	1.08342	3.43196	4.4815	301	1.1116	-0.97326	0.701007	0.478225	-0.227795	-0.500423
302	0.81617	9.09587	9.67273	7.53978	10.5673	9.02738	8.93042	2.84486	4.01392	302	0.574302	3.975	5.9323	0.458018	3.68237	2.10703	1.13639	3.22689	4.76829	302	1.71678	-0.643128	-0.0272935	0.669934	-0.17066	-0.404394
303	0.531374	8.80824	9.49236	7.84619	10.6868	9.19781	9.84618	2.74915	3.4976	303	0.109178	4.04937	6.54873	0.599855	3.68166	3.00934	1.33784	3.21347	4.5755	303	0.981968	-1.03623	-0.0512465	0.283551	-0.214754	-0.420292
304	0.864194	9.27509	9.80316	8.2285	10.4724	9.25304	9.61678	3.34694	3.35694	304	0.446938	4.07254	5.70349	0.498053	3.71813	3.17039	1.37592	3.35912	4.61157	304	1.15856	-0.343051	0.755387	0.203508	-0.142093	-0.429832
305	0.481674	8.68518	9.47571	8.70904	10.8108	9.61494	9.49133	3.8226	4.11942	305	0.188468	3.63204	6.5329	0.890357	3.45238	3.24529	1.37725	3.5435	4.83109	305	1.75118	-1.09825	0.747618	0.347784	-0.161966	-0.504239
306	0.799976	8.32569	8.5686	7.90669	10.9581	9.9764	9.3384	2.9858	2.74978	306	0.143441	4.36849	6.71764	0.498566	3.51027	3.3683	1.40958	3.35812	4.72738	306	1.24256	-0.689404	0.120309	0.163486	-0.0799892	-0.384043
307	0.768704	8.2464	8.88678	7.89671	10.6419	10.0266	9.21526	2.93706	2.99358	307	-0.248751	3.92024	6.56556	0.508342	3.67649	2.93962	1.43766	3.4439	4.85865	307	1.78557	-1.30435	-0.00592999	0.877948	-0.101104	-0.498515
308	0.708394	7.9532	10.0318	7.6996	10.9791	10.3182	10.0349	2.9488	3.0645	308	0.438297	4.30908	6.12496	0.847597	3.49574	2.96624	1.54021	3.35677	4.89159	308	1.68041	-0.825845	0.089882	0.586926	-0.111041	-0.296916
309	0.597826	8.00523	8.34377	8.03702	11.0761	9.98862	8.7821	3.38629	2.98362	309	0.153541	4.06153	6.33464	0.664411	3.4634	2.73713	1.4574	3.66457	5.01469	309	1.82988	-0.968489	0.680939	0.44018	-0.0886836	-0.352245
310	0.56823	8.57636	9.4125	7.79111	11.1949	10.102	9.49503	3.47437	2.5218	310	0.281036	4.06723	6.83808	0.518888	3.57762	3.28008	1.47585	3.623	4.70788	310	1.1407	-1.32057	0.730787	0.903641	-0.143335	-0.380863
311	0.784898	8.90818	8.88172	7.81474	11.0243	9.51581	9.63341	2.83312	3.09673	311	0.429837	4.60481	6.63095	0.386411	3.26142	2.72828	1.41533	3.58111	4.88672	311	1.64998	-0.70133	-0.0434779	1.32807	-0.040864	-0.314087
312	0.759211	8.86481	9.38574	8.68996	10.3661	9.99722	9.15543	3.02397	2.36766	312	0.371964	4.45363	6.32169	0.794741	3.31665	2.91002	1.46338	3.66058	4.85771	312	0.983291	-0.196591	0.142967	1.69864	-0.186807	-0.398034
313	0.830689	8.85222	9.48688	8.57633	11.1315	10.0678	9.49387	3.40097	2.50187	313	0.0848742	4.60445	6.56511	0.426926	4.02125	3.56538	1.42967	3.74406	4.83947	313	1.0534	-0.567274	0.835662	1.32362	-0.124083	-0.436191
314	0.735199	8.06986	9.43673	8.54879	11.1994	9.7598	9.29843	2.95526	3.05453	314	0.213486	4.92373	6.41836	0.622068	3.43649	3.02192	1.45409	3.65179	5.05258	314	1.78689	-1.34633	0.0322653	1.33202	-0.0688106	-0.274022
315	0.736874	9.02319	9.17461	8.72921	11.1171	10.1038	8.82785	3.07741	2.58509	315	0.784929	4.46053	6.44467	0.734352	3.93723	2.91988	1.59541	3.77271	4.94732	315	1.24521	-1.33345	0.105419	1.51978	-0.113525	-0.447003
316	0.84465	9.31267	9.57454	8.25864	11.2385	9.69394	9.13487	3.05509	3.25497	316	0.276418	4.46536	6.32437	0.86856	4.02642	3.2152	1.54803	3.7963	5.00455	316	1.80012	-1.24567	0.0717554	1.48865	-0.190533	-0.456542
317	0.991515	9.1638	9.60657	8.21679	11.5003	9.8784	9.63618	2.84897	3.22391	317	0.79181	4.50736	6.29534	0.251561	3.29874	2.8597	1.5585	3.76303	5.11844	317	1.82922	-0.827277	0.00572283	1.45209	-0.094894	-0.537309
318	0.522439	9.35397	9.39733	8.33497	11.5497	9.99179	9.51605	3.64643	3.2409	318	0.797081	4.62536	6.59714	0.993152	3.50565	3.3505	1.59259	3.99894	5.09086	318	1.91917	-0.402685	0.709423	1.04594	-0.174386	-0.492156
319	0.898817	8.39796	9.37289	8.34625	11.0609	10.3406	9.82816	3.18663	3.37921	319	0.14504	4.99568	6.61172	1.17711	3.88978	3.43879	1.71199	3.84068	5.1893	319	1.97208	-1.46035	0.0840556	1.34981	-0.360697	-0.693119
320	0.850792	7.97158	10.2939	8.46617	10.8661	10.4913	9.58767	3.16843	2.91739	320	0.198316	4.70905	6.78523	0.856412	3.90947	3.34395	1.49622	3.77599	5.13776	320	1.13475	-1.32629	0.018023	1.18626	-0.040864	-0.328078
321	0.954659	8.4087	9.25173	8.28965	11.49	10.7822	9.77526	3.19192	2.64136	321	0.717108	4.67265	6.67596	0.827083	4.16316	3.65455	1.51519	3.8525	5.25914	321	1.12417	-1.04387	0.00701758	1.02667	-0.178113	-0.57801
322	0.722913	8.40353	9.75259	8.21332	10.9889	10.3394	10.0617	4.00229	3.33409	322	0.315922	4.75512	6.67986	0.571552	3.43112	3.40047	1.56866	4.05827	5.41835	322	1.76903	-1.40548	0.640154	0.597796	-0.204817	-0.384679
323	1.06969	8.24826	9.67083	8.52428	11.5979	9.6756	10.2535	3.61355	3.1231	323	0.359641	4.82502	6.28413	0.626716	4.26863	3.63412	1.65445	4.03227	5.38909	323	1.87883	-0.660302	0.665401	0.343337	-0.134019	-0.336982
324	1.4645	8.69282	9.87375	8.65006	11.1551	10.3616	9.94274	3.17606	2.61791	324	0.495063	4.69869	6.74216	0.965939	3.92274	3.8466	1.82389	3.87755	5.28569	324	1.18436	-0.741404	0.0432708	0.47526	0.568991	0.269087
325	1.80179	8.64202	9.73278	8.57221	11.6101	10.2376	10.1749	3.21188	2.66245	325	0.955781	5.18589	6.85118	0.416701	3.67948	2.69702	1.82426	3.75245	5.24406	325	1.01239	-0.899314	0.0549236	0.371994	0.467763	0.0795712
326	0.805002	8.96434	9.63459	8.34408	11.5366	9.6068	9.74222	2.98462	2.67593	326	0.743333	5.00044	6.77377	1.0096	4.07761	3.28403	1.70036	3.87932	5.28296	326	1.16319	-0.631678	0.0827609	0.901665	-0.155134	-0.537945
327	0.731848	9.53423	10.0813	9.01393	10.9465	10.6378	9.91849	3.51665	2.79197	327	0.725427	4.98892	7.5609	0.813717	3.77621	3.72757	1.71116	4.00661	5.33691	327	1.16782	-0.781478	0.715897	0.586926	-0.00857027	-0.21615
328	0.781548	9.21501	9.40049	8.51995	11.0092	10.2349	9.50196	3.17254	3.27196	328	0.25144	5.21767	6.99485	0.634377	4.31719	3.70331	1.70268	3.91753	5.34987	328	1.82525	-0.911241	0.095061	0.280093	-0.178734	-0.34207
329	0.620163	8.61538	9.85921	8.60712	11.9172	10.8763	9.61146	3.66464	2.85293	329	0.348535	5.29346	7.1797	0.798075	4.18458	3.33189	1.70103	3.98523	5.37933	329	1.77366	-0.530539	0.777398	0.382865	-0.165071	-0.485796
330	0.966944	9.46609	10.5919	8.32023	11.3045	10.9748	9.322	3.73217	2.8289	330	0.32068	5.0886	6.9921	0.413849	3.49574	3.31967	1.78072	4.05021	5.34185	330	1.63874	-0.865442	0.701007	0.1205	-0.105452	-0.350973
331	0.660928	9.23297	10.5912	7.93141	12.0004	10.7634	10.545	3.32463	3.82462	331	0.585096	4.71768	7.15126	1.07553	3.7073	3.60283	1.77583	3.99095	5.35956	331	1.63477	-1.19653	0.0924715	0.00735214	-0.0191278	-0.394218
332	0.871454	9.16256	9.32211	8.41195	11.7389	10.8874	10.1507	3.7216	2.67476	332	0.176285	5.39431	7.33776	0.425837	3.98118	2.99568	1.70252	4.04377	5.34129	332	0.974693	-0.448961	0.644685	0.10963	-0.0681895	-0.414569
333	1.05964	9.48488	9.29535	8.3122	11.7604	10.753	9.82862	3.06449	3.3294	333	0.63976	5.09112	6.94823	0.498149	3.89352	3.72413	1.69241	4.04891	5.4577	333	1.81798	-1.19891	-0.0143459	-0.0914669	0.051049	-0.288649
334	0.825663	9.40084	9.46391	8.14176	11.4849	10.9542	9.78057	2.98051	3.27079	334	0.718204	4.94772	7.17615	0.713742	3.75365	3.17347	1.80697	3.99402	5.34733	334	1.73001	-0.749991	0.0730502	0.264776	-0.0694316	-0.490248
335	0.56823	9.3135	9.04797	7.73971	11.8389	11.3328	9.80667	3.20484	3.41496	335	0.467399	5.27857	7.5159	0.741724	4.15679	3.32145	1.80763	3.98208	5.56489	335	1.84245	-1.28813	-0.0512465	-0.0746677	-0.0452113	-0.388495
336	0.824546	9.43759	9.49868	8.4627	11.7154	10.865	9.83694	3.11029	4.43706	336	1.01843	5.62718	7.50404	0.826506	3.736	3.23608	1.75261	3.98401	5.54257	336	1.857	-0.822029	0.036797	-0.23426	-0.0924098	-0.497243
337	0.668746	10.1431	9.09707	7.82754	12.0023	10.9614	10.205	2.88597	3.48998	337	0.340266	4.94672	7.6032	0.637743	4.02174	3.65834	1.67947	3.96008	5.5983	337	1.8107	-0.899791	-0.0259987	0.371994	-0.0924098	-0.385951
338	0.510154	7.75229	9.35266	7.81561	11.3952	11.0372	10.4064	3.58184	3.41496	338	0.603223	5.46769	7.25985	0.502573	4.53064	3.18157	1.60498	4.17174	5.62533	338	1.77763	-1.23851	0.638212	0.140264	-0.169418	-0.576738
339	0.648643	8.44483	9.47213	8.49848	11.6727	11.039	10.1629	2.70041	3.44661	339	0.147656	5.2705	7.5036	0.536357	4.7658	4.14325	1.7208	4.03115	5.76131	339	1.79483	-1.35778	-0.0214671	0.122476	-0.256984	-0.61744
340	1.07081	9.13943	9.40787	7.90279	11.965	11.1549	10.0114	2.87951	3.49877	340	0.854039	5.1577	7.23371	0.605272	4.31827	3.04815	1.75443	3.94427	5.6817	340	1.89669	-0.539127	-0.110805	0.465873	0.364671	-0.010099
341	1.26793	8.65234	9.40239	8.24324	11.7184	11.3466	10.1969	3.69635	3.59664	341	0.663873	5.77559	7.36223	1.28003	4.27335	3.31999	1.72641	4.07424	5.7337	341	1.97671	-0.48331	1.02793	0.300351	0.396965	-0.0368093
342	1.26793	8.95649	9.28397	8.61991	12.3006	11.2513	10.3378	3.11029	3.15885	342	0.387365	5.45607	7.53884	-0.120228	4.89081	3.06844	1.7928	3.94834	5.50097	342	1.25645	-0.119783	-0.0758469	0.35816	0.425532	-0.0145507
343	0.569347	8.59102	9.60425	8.12506	12.2531	11.1262	10.1721	3.87662	3.59196	343	0.921448	5.71283	7.78732	0.0276353	3.99857	4.24483	1.7509	4.02082	5.81365	343	1.96878	-1.21847	1.09397	0.309244	-0.209785	-0.509963
344	1.10823	8.96103	9.91694	7.7768	12.1254	11.1601	10.1641	3.51783	3.68162	344	0.45405	5.08561	7.36533	0.896832	3.75057	3.52417	1.741	3.95464	5.87924	344	1.93901	-0.95704	0.887452	0.0992539	0.341072	0.0350541
345	0.579398	9.14687	9.47529	8.28119	12.072	11.8955	10.6222	3.55952	3.61833	345	0.894005	5.71738	7.87138	0.583604	3.83615	3.34797	1.73802	4.0032	5.93	345	1.9959	-1.20368	0.898458	0.31715	-0.262573	-0.553208
346	0.605644	9.06489	10.3196	7.96069	12.1829	11.4505	10.6852	3.40332	3.03578	346	0.322582	5.40397	7.45698	1.33398	4.57547	3.05635	1.71181	3.94783	5.71994	346	1.33846	-0.901222	0.814298	0.504412	-0.155134	-0.516958
347	0.625189	9.03	9.37204	8.81617	12.045	11.3525	9.77918	3.69928	3.69393	347	0.609601	5.51603	7.69419	0.056772	4.24887	4.40225	1.68371	3.98983	5.9852	347	1.9787	-0.850176	0.526215	0.416463	-0.24891	-0.585642
348	0.964711	9.25341	9.56569	8.39027	12.1547	11.4231	10.22	3.62177	3.6828	348	0.584201	6.00938	7.88013	0.634569	3.76448	3.59534	1.86397	3.92011	5.83243	348	1.99722	-0.62166	0.862852	0.333455	0.437332	0.126632
349	0.571022	8.75848	9.75301	8.50672	12.4668	11.0404	10.1488	3.6664	3.16002	349	0.571315	5.55189	7.8061	0.380737	4.34768	4.10356	1.69936	3.95267	5.82657	349	1.21809	-0.645513	0.84861	0.0409506	-0.26071	-0.610444
350	0.514063	8.96909	10.0459	8.44969	12.368	11.2212	10.1641	3.60063	3.83107	350	0.258351	5.94916	7.54257	0.744417	4.24556	3.62653	1.59737	4.14479	6.01562	350	1.92645	-1.03671	0.960606	0.383359	-0.276236	-0.546212
351	0.433091	9.51585	9.92348	8.54835	12.4654	10.6706	10.2022	3.61472	3.63943	351	0.562351	5.93506	8.04298	0.366281	4.26886	4.27405	1.66365	4.10808	5.92456	351	1.93637	-0.800561	0.906874	0.483166	-0.315982	-0.599633
352	0.350444	8.89269	10.0179	8.80727	12.11	11.1088	10.8185	3.63351	3.23973	352	0.393321	5.81126	7.71801	0.46882	4.27429	4.08203	1.70402	4.14499	5.99787	352	1.26306	-0.564888	0.867383	0.331479	-0.342065	-0.731276
353	1.08812	9.18486	9.60699	8.881	12.1778	11.4229	10.5445	3.46791	3.76719	353	0.443045	5.75903	7.6942	0.39218	3.90847	3.92159	1.78432	4.12461	6.20049	353	1.87287	-0.814396	0.86091	0.545422	0.35784	-0.0139148
354	0.434766	9.07894	10.1681	8.68107	12.4514	10.9951	10.4475	3.66757	3.1864	354	0.430068	5.60995	7.63529	0.30118	3.9726	3.64128	1.7484	4.16594	6.02253	354	1.2538	-0.645513	0.864147	0.318632	-0.327782	-0.813951
355	1.02279	8.88835	9.83013	8.58045	12.5538	11.6984	10.8151	3.8132	3.37277	355	0.385303	5.71921	7.77693	0.620049	3.7088	3.63409	1.88579	4.13339	5.80474	355	1.19229	-0.604008	0.891984	0.0152577	0.385165	-0.0387172
356	1.17635	9.33477	10.4696	9.04364	12.2981	11.5641	10.8631	3.39157	3.27196	356	0.678147	5.98016	8.07949	0.601747	4.55395	3.55309	1.93962	4.17078	5.97816	356	1.23198	-0.509071	0.555994	0.681298	0.428638	0.0528609
357	0.708394	9.5557	10.4747	8.66047	12.3543	11.7816	10.8271	3.78854	3.71151	357	0.641359	5.67941	8.34144	0.829775	4.56916	3.62452	1.84814	4.18224	6.14301	357	1.84973	-1.29051	0.578005	0.597302	-0.0880626	-0.520774
358	0.66372	9.74732	10.0914	9.20737	12.1587	11.9297	10.2604	3.6846	3.85686	358	0.454966	5.73213	7.97624	0.639409	3.99398	3.59333	1.88642	4.34608	6.11877	358	1.857	-1.35444	0.837604	0.53554	-0.0619792	-0.480073
359	0.66372	9.25734	9.4616	8.90919	12.7167	11.5841	11.1953	3.90129	3.89437	359	0.39836	6.01743	7.47308	0.435901	4.54865	3.99458	1.81295	4.38885	6.12892	359	1.85369	-1.47037	0.683528	0.755906	-0.143956	-0.460358
360	0.791041	9.64593	9.48646	8.59172	12.6654	11.2629	10.7229	3.63234	3.69276	360	0.441546	5.88955	8.22278	0.355126	4.98101	3.79423	1.96091	4.17531	6.2298	360	1.77499	-0.89025	0.722371	0.752942	-0.129672	-0.436827
361	0.594476	9.80079	9.76081	9.19023	12.7607	11.9869	10.5432	3.63234	3.96	361	0.648471	5.2048	8.25578	0.90305	4.41955	4.15547	1.89425	4.32086	6.18862	361	1.84774	-1.14596	0.998154	0.432768	-0.347034	-0.759895
362	0.396235	9.58626	10.0895	8.84544	12.8356	11.1504	11.1142	3.70985	3.85686	362	0.276459	5.60899	8.33888	1.29606	4.88633	3.87176	1.81942	4.27565	6.13544	362	1.78226	-1.35682	0.815593	-0.31381	-0.370633	-0.780881
363	0.56097	9.60959	9.71319	8.9389	12.716	11.6477	10.8269	4.00229	3.96411	363	0.398833	5.73831	8.26183	1.01328	4.03754	4.03352	1.86363	4.50297	6.308	363	1.80673	-1.00284	0.980675	0.580997	-0.235869	-0.643514
364	0.407404	9.86769	9.97341	8.7652	12.6605	11.6056	10.9687	4.07628	3.94008	364	0.276881	5.89129	8.34997	1.29731	4.30452	4.08336	1.90578	4.33221	6.24967	364	1.84311	-1.51807	0.943127	0.691674	-0.301698	-0.723645
365	0.548685	10.0715	9.29577	8.95929	12.3475	11.6065	11.1833	3.89718	3.13775	365	0.0122944	5.51668	8.25845	0.228162	4.71217	4.70153	1.8817	4.46887	6.07461	365	1.14864	-0.534356	0.811062	0.365571	-0.406653	-0.762438
366	0.58945	9.80823	10.1829	9.05774	12.4796	11.7814	11.2549	3.8408	3.88909	366	0.729099	5.99258	8.10238	0.668129	4.86578	4.03599	1.93537	4.34538	6.17996	366	1.83584	-1.0639	1.13928	0.842373	-0.216617	-0.503603
367	0.612904	9.96082	9.95824	9.55238	12.379	12.2155	11.3804	3.87134	4.03737	367	0.0364072	5.74936	8.26894	0.829327	4.96723	3.69034	2.14698	4.51864	6.31785	367	1.7816	-0.886433	0.904284	0.0770196	-0.281204	-0.536037
368	1.05629	9.973	10.4224	9.21452	12.5351	11.9686	10.0728	3.19309	3.88675	368	0.603908	5.63175	9.05405	1.04774	4.70824	3.93453	2.16905	4.5322	6.32762	368	1.9496	-0.706101	0.283448	0.733672	0.239843	-0.0934096
369	0.411313	9.66927	10.2733	9.40383	12.496	11.6601	10.3006	3.67932	3.88323	369	0.365596	5.96203	8.01964	0.506067	4.4242	3.46788	2.04744	4.52147	6.36548	369	1.98002	-0.827754	0.884215	0.312209	-0.333371	-0.788513
370	0.418572	9.4857	10.4926	9.27654	12.23	12.2314	11.1147	3.74391	4.05612	370	0.0635781	6.21303	8.1049	0.358011	5.0125	4.12638	2.15338	4.63227	6.38789	370	1.87552	-0.786249	1.10562	0.631394	-0.204817	-0.625071
371	0.361613	9.76796	10.7158	9.2477	13.1381	11.5148	10.4526	3.70163	3.61833	371	0.461303	5.88326	8.62188	0.885356	4.34368	4.20446	2.13462	4.62338	6.32519	371	1.20089	-1.06629	0.800056	0.687227	-0.289278	-0.747175
372	0.9474	9.41963	10.6519	9.07357	12.1408	11.618	10.7349	3.17606	3.79825	372	0.314997	5.97946	8.51344	0.904909	4.69878	4.53872	2.19089	4.52558	6.3886	372	1.90925	-0.837772	0.426519	0.81421	0.278347	-0.123936
373	0.552035	9.406	10.5834	9.45523	12.2223	11.8864	11.781	3.19603	3.95649	373	-0.0200873	6.31165	8.50583	0.477347	4.96469	4.52436	1.99343	4.43131	6.40494	373	1.83716	-1.06009	0.405155	1.19022	-0.27251	-0.624435
374	0.453194	9.81896	10.9558	9.39538	12.6626	12.5761	10.7338	3.11851	3.82345	374	0.536307	6.03887	8.06562	0.701305	5.17255	3.52482	2.21117	4.49643	6.2281	374	1.81004	-0.964673	0.498378	0.607678	-0.213511	-0.562111
375	0.694434	9.63169	10.4439	9.62567	12.5808	12.0032	10.6173	3.49786	3.91019	375	0.361854	5.6557	8.49085	0.665245	4.34716	4.05638	2.1881	4.62482	6.43918	375	1.90065	-1.44222	0.376023	0.935263	-0.15886	-0.564655
376	0.583307	8.09485	10.9172	9.52028	12.7234	12.3613	10.9569	3.21834	3.95532	376	0.407334	6.10489	8.99782	0.60649	5.04419	4.03732	2.22197	4.57075	6.38087	376	1.72671	-0.813919	0.449824	0.734166	-0.104831	-0.497879
377	1.26905	10.0833	11.1201	9.43745	12.0207	12.431	11.4014	3.92771	3.71913	377	0.416518	5.46853	8.60633	1.13855	4.60287	4.12172	2.26106	4.75803	6.45228	377	1.79747	-0.890727	0.9127	0.49206	-0.156376	-0.643514
378	0.420806	8.75373	10.1447	9.16703	12.5011	12.3529	10.9019	3.90657	4.52028	378	0.407786	6.17805	8.85243	0.41497	4.80913	4.76913	2.30962	4.8016	6.48348	378	2.54618	-1.06915	0.879684	1.03556	-0.251395	-0.598997
379	0.740224	10.3577	10.567	9.45956	12.9155	12.4645	11.1069	3.8684	4.3808	379	0.518944	6.01168	8.70719	0.685567	4.89825	3.36344	2.25219	4.80757	6.46884	379	1.94364	-0.916012	1.04088	1.15019	-0.350139	-0.720465
380	0.306887	9.02959	10.4454	9.47279	12.5225	12.6553	11.704	3.92478	4.61112	380	0.61789	6.14123	8.47988	1.00937	4.40791	3.86832	2.32342	4.84122	6.46556	380	2.08055	-0.743312	1.07066	0.783082	-0.467514	-0.914433
381	0.554828	9.25403	10.6037	8.78516	12.4841	11.8835	10.9729	3.99348	4.3263	381	1.00792	6.19968	8.75197	0.0641122	5.18799	4.29664	2.29394	4.85346	6.50071	381	1.97142	-0.974214	0.999449	0.719343	-0.540796	-1.00474
382	0.887648	9.40518	10.7139	9.23946	12.643	12.359	10.7924	3.4914	4.35326	382	0.640213	6.64107	8.54012	0.957349	4.81449	4.74994	2.42873	4.7821	6.59543	382	2.03095	-0.813442	0.397387	0.966885	0.0373862	-0.340798
383	0.948516	9.27551	10.9604	9.50337	12.4302	12.5254	11.409	3.63351	4.29348	383	0.610356	6.59408	9.0061	1.07931	4.75966	4.29463	2.5025	4.9072	6.5896	383	1.98531	-1.51473	0.380555	0.761836	0.236117	-0.107401
384	1.00771	8.86481	10.7832	9.01849	12.7202	12.3396	11.2224	3.54132	3.98403	384	0.541578	6.82099	8.78018	1.45479	5.27971	4.56872	2.57054	4.82721	6.51202	384	1.36426	-1.08203	0.398034	0.637818	0.223075	-0.227597
385	0.409637	9.83879	11.011	9.93751	12.6398	12.5761	11.3346	4.06689	3.80704	385	0.444534	6.5407	8.22469	0.749129	5.48861	4.33231	2.35116	4.99071	6.40272	385	1.24984	-0.376446	1.11339	1.03161	-0.448262	-0.813951
386	0.542542	8.73225	11.0803	9.46932	13.0954	12.3751	11.5245	3.0134	4.34212	386	0.946828	5.97394	8.73882	0.970074	4.59607	4.50179	2.32562	4.84583	6.65112	386	2.02235	-1.51426	0.461477	0.828538	-0.475588	-0.910617
387	0.414663	9.29904	10.4389	9.2117	12.8831	12.4534	11.1928	3.44442	3.90433	387	0.289274	6.27162	8.30236	1.1631	5.1693	4.20239	2.40606	4.74656	6.38208	387	1.24719	-1.0162	0.423282	1.01185	-0.431494	-0.868643
388	1.93302	9.61207	10.7305	9.6543	12.784	12.56	10.292	4.1262	4.43062	388	0.483806	5.86054	8.81683	0.82266	4.76954	4.34009	2.5463	4.95157	6.72333	388	1.99722	-0.765735	1.10821	0.950086	0.24357	-0.0686072
389	0.89044	9.49747	10.8249	9.35092	12.9917	13.0201	10.3394	2.88186	4.41303	389	0.323205	6.41884	8.53818	0.297751	4.7882	4.18131	2.4166	4.81385	6.62801	389	2.00185	-1.29576	0.357897	0.185226	0.287042	-0.118212
390	1.14899	9.43945	10.8529	9.59835	12.7936	11.8792	10.6344	3.45088	4.38842	390	0.748846	6.09176	8.51631	1.16736	4.6784	4.18725	2.52579	4.76372	6.78282	390	2.01309	-1.04864	0.45824	0.93131	0.167803	-0.221873
391	0.689408	9.5652	10.7423	9.9143	13.0735	13.053	10.9729	3.32463	4.49157	391	0.845538	6.47097	9.00142	0.553346	5.11505	4.94691	2.37276	4.90542	6.7872	391	1.9787	-0.802469	1.12375	0.581491	-0.446399	-0.827942
392	1.19757	9.9476	10.2827	9.60984	12.8218	11.7214	10.8493	3.52957	4.71193	392	0.85266	6.33018	8.8156	1.00133	5.3507	4.46438	2.37929	4.82129	6.84651	392	2.12487	-1.44699	0.41875	0.655111	0.16594	-0.151282
393	0.606761	10.1227	10.8139	9.22233	13.1434	12.1718	11.211	3.21717	4.52263	393	0.523703	7.0858	8.56662	1.24618	5.11869	4.5944	2.42429	4.8962	6.73861	393	2.00714	-1.44794	1.05577	0.299857	-0.442052	-0.771342
394	0.413546	9.82227	10.2815	9.60399	12.1105	12.7961	10.7913	4.22603	4.46519	394	0.302955	6.82121	8.76405	0.358043	5.09009	3.78658	2.43333	4.98772	6.88174	394	1.94232	-0.976122	1.00981	0.696121	-0.509124	-0.727461
395	0.987048	9.72336	10.8428	9.24054	12.7085	12.5697	10.761	3.61883	4.60702	395	0.552584	6.68406	8.88988	0.103314	4.92663	4.36282	2.64734	4.81708	6.90865	395	2.07196	-1.20034	0.405803	0.539987	0.0671959	-0.427288
396	0.705602	10.208	10.572	9.15771	12.7955	12.6913	11.1729	4.31117	4.47281	396	0.410009	6.46523	8.78945	1.08223	5.05687	4.43656	2.54025	4.97885	6.87069	396	1.95357	-0.522429	1.14446	0.863619	-0.209785	-0.70075
397	0.376132	11.0775	10.0432	9.48689	13.0719	12.7033	10.7617	3.5742	4.06491	397	0.698759	6.69996	8.91991	1.24689	4.90742	4.4076	2.50151	4.61701	6.61397	397	1.3841	-1.04387	0.584479	0.822115	-0.358212	-0.737
398	0.850792	9.91518	10.2164	9.69637	12.998	12.7526	11.3011	3.81849	4.43413	398	0.532495	6.29583	8.32527	1.1748	5.27991	4.07538	2.52138	4.83582	6.87063	398	1.97208	-1.2409	0.484783	0.985167	0.142962	-0.223145
399	0.305771	10.1161	10.7235	10.4102	12.84	12.8189	11.0073	3.59241	4.70783	399	0.0991085	6.83064	8.93005	0.80035	5.28829	4.36989	2.44223	4.95492	6.91745	399	2.08915	-1.041	1.12698	0.640288	-0.41659	-0.833666
400	0.829572	10.2305	10.465	9.70265	13.101	11.7918	10.8017	2.94469	4.71076	400	0.298912	6.8644	8.85136	0.661302	5.32242	4.25028	2.58548	4.77859	6.72059	400	2.03359	-0.677	0.599369	0.701062	0.184571	-0.0921377
401	0.784898	9.83817	10.2075	9.90931	13.3469	12.2703	11.3651	3.80968	4.68966	401	0.550642	6.51209	8.37879	0.399617	5.71662	5.03177	2.60926	4.87376	6.92013	401	1.91851	-1.12449	1.14899	0.604713	0.196992	-0.171633
402	1.22717	10.2681	11.0921	9.94076	12.771	12.2588	10.8116	2.71509	3.32295	402	0.819585	6.85663	8.69368	0.10934	4.85366	4.0247	2.32795	4.75189	6.91812	402	1.92777	-1.30816	0.533336	0.989614	-0.20668	-0.456542
403	0.894908	9.78944	10.5124	10.088	13.012	12.8843	11.2981	4.1814	3.40383	403	0.618625	6.74014	9.23431	0.966772	5.38411	4.39165	2.53134	4.78631	7.03222	403	2.00383	-1.37972	1.03764	1.04989	0.176498	-0.300732
404	1.58512	10.2061	10.5023	9.95138	12.6941	12.7481	11.3464	3.76623	3.69745	404	0.62115	6.78669	9.21082	0.47116	5.23242	4.56638	2.55813	4.97207	7.09183	404	2.05079	-1.11447	1.11403	0.781105	0.373366	-0.0349014
405	1.10432	10.4634	10.65	10.1095	12.6325	12.5301	11.3356	4.43214	3.51987	405	0.573377	6.96962	9.03572	0.817499	4.51758	4.52141	2.57303	4.84138	7.01279	405	2.03293	-0.905039	1.20855	0.657087	0.23798	-0.0387172
406	1.0736	10.6515	10.5689	10.5035	12.512	11.9915	11.6844	3.08563	3.14772	406	0.727489	6.93855	9.2444	0.715024	5.62746	4.93116	2.68309	4.84471	7.06871	406	1.38873	-1.00284	0.491257	0.953545	0.227423	-0.0546161
407	0.347652	10.1836	10.7294	10.0357	13.2826	13.0914	11.5028	3.041	3.62302	407	0.565571	7.335	8.96738	1.3902	5.3403	3.84202	2.60345	4.96287	7.16782	407	1.98928	-0.994728	0.469246	0.376935	-0.36877	-0.684851
408	0.393443	10.5648	10.9128	10.3278	12.9738	12.7732	11.8001	3.61766	3.55738	408	1.07131	6.45929	9.16224	0.396572	4.94438	4.47728	2.61758	5.06808	7.17894	408	2.11296	-0.662688	1.23056	1.02568	-0.401064	-0.785969
409	1.58847	10.2076	10.5541	9.84036	12.8444	13.2985	11.4492	2.99637	2.99827	409	0.42708	6.87297	9.33563	0.668963	5.36139	5.15741	2.7526	4.94834	7.06059	409	1.50712	-1.33058	0.51521	0.640288	0.306915	0.0216989
410	0.450402	11.0081	10.5293	9.96309	12.8286	12.5892	11.2475	3.77386	2.79666	410	0.748152	7.20933	9.29321	0.773457	5.29304	4.40163	2.61071	5.1853	7.13352	410	1.46281	-0.833001	1.15547	0.888324	-0.408516	-0.824126
411	1.21712	10.6116	10.2956	10.3558	13.0712	12.955	10.8969	3.09737	3.11666	411	1.00194	7.12356	9.44376	0.875548	5.42715	4.30731	2.6938	4.94284	7.12324	411	1.54085	-0.816781	0.522978	1.19713	-0.506639	-0.981844
412	0.955776	10.6172	10.8883	10.3237	12.7649	12.9045	11.0558	3.82377	3.05688	412	0.827854	7.22942	9.67205	0.663225	5.32135	4.64012	2.95564	5.06356	7.03205	412	1.4714	-1.03289	1.10109	1.0746	0.229286	-0.184352
413	0.56097	11.0638	10.8871	11.0612	12.8272	12.8929	11.3344	3.15903	3.91429	413	0.723355	7.2295	9.20574	1.14175	5.27916	4.38494	2.75853	4.96814	7.16632	413	2.11693	-0.878323	0.451119	0.80581	-0.41659	-0.735092
414	0.315822	10.4498	10.8635	10.4918	13.0323	12.3081	11.4659	3.19074	3.3294	414	0.098867	7.21277	8.9235	1.11553	5.2787	4.56872	2.88796	4.97781	6.99413	414	1.24653	-1.0119	0.584479	0.913029	-0.323434	-0.65051
415	0.674889	10.8229	11.5186	10.247	13.1633	12.8042	11.1272	3.13026	3.24852	415	0.413993	7.04625	9.2973	0.768297	5.42523	4.18614	2.81097	4.91851	7.13395	415	1.3669	-1.08537	0.511325	1.11116	-0.2545	-0.796144
416	0.731848	10.8008	10.6426	10.5289	13.1236	12.7338	11.4245	3.02632	3.92191	416	0.757115	6.97656	9.30335	0.75961	5.48939	4.59466	2.88597	5.00054	7.2175	416	2.06204	-0.568228	0.598074	0.283057	-0.350139	-0.818403
417	0.97197	10.5412	11.3268	10.3534	13.188	12.857	11.4039	4.0434	3.92191	417	0.723526	7.47126	9.36848	0.72932	5.04068	4.82364	3.04642	5.13445	7.34516	417	1.98597	-1.60824	1.15094	0.458461	0.456584	0.0503171
418	0.498985	10.4221	11.7596	9.7701	13.1127	12.8384	10.6876	3.25886	3.66287	418	0.949464	7.15401	9.33627	1.09249	4.82077	4.53123	2.96927	4.92383	7.27209	418	1.89669	-1.29814	0.456946	0.860655	-0.364423	-0.911253
419	1.18138	10.9222	10.8778	9.53091	13.3012	13.2741	11.85	3.79911	3.78712	419	0.275543	7.24349	9.77065	0.614921	5.0673	4.52465	3.04549	5.31427	7.25434	419	1.79086	-1.07488	1.21762	0.583961	-0.373738	-0.850837
420	0.859169	11.055	11.2937	10.1123	13.3439	13	11.8461	3.91068	3.66639	420	1.10047	7.34423	9.44773	0.873753	5.10602	4.63418	3.16622	5.24681	7.29993	420	1.83716	-1.1388	1.21308	1.15612	0.342314	-0.187532
421	1.25677	10.7008	11.2069	9.7985	13.3241	12.1694	12.0429	3.27354	3.57203	421	1.07773	7.30742	9.41657	0.286179	4.86851	4.35345	3.08851	5.16335	7.30716	421	2.01904	-1.02526	0.649864	0.314185	-0.338339	-0.887722
422	0.522439	10.1231	10.8306	9.61548	13.2155	12.8671	11.54	3.21306	3.98403	422	1.07687	6.88886	9.19759	1.00639	5.42019	4.99192	3.21223	5.07793	7.43379	422	2.19498	-0.940342	0.613611	0.730214	-0.253879	-0.795508
423	0.954659	9.99778	10.6409	9.71718	12.8267	12.7069	11.236	3.36691	3.98872	423	0.879801	7.44679	9.39482	1.10242	5.59028	4.28218	3.36154	5.09861	7.4025	423	2.11627	-1.31532	0.536573	0.678334	0.449753	-0.130931
424	1.01999	10.6364	10.9724	9.93642	13.3553	12.8533	11.4381	4.08803	3.4765	424	0.529668	6.97974	9.22169	1.64833	5.72445	4.60545	3.31535	5.09956	7.31044	424	1.47471	-1.08585	1.06095	1.20702	0.420564	-0.0857781
425	1.06858	10.6313	11.0815	9.58512	13.1991	12.9477	11.1886	3.75448	3.5058	425	0.585146	7.62598	9.42393	1.33202	5.14235	4.72127	3.22817	5.14406	7.29927	425	1.56995	-1.426	1.08296	0.871525	0.329272	-0.149374
426	0.402378	10.8123	10.8763	10.1164	13.126	13.459	11.486	3.20366	3.56968	426	0.856433	7.60486	9.74949	0.787785	5.80542	5.03255	3.27523	5.13478	7.3408	426	1.52233	-1.29099	0.499025	0.586926	-0.383675	-0.852744
427	0.985372	10.3135	11.4827	9.78701	13.1148	12.9233	11.5363	4.09977	4.19795	427	0.949584	7.37541	9.50531	1.05502	5.74574	4.61722	3.42689	5.3556	7.48029	427	2.11693	-1.08299	1.07454	0.964415	0.298842	-0.109945
428	0.0606225	10.89	11.4777	9.92688	13.0558	13.5246	11.0105	3.46909	4.16689	428	0.939243	7.51382	9.94965	1.07463	5.25875	5.38973	3.23067	5.22694	7.53153	428	2.09643	-0.526246	0.627206	0.605207	-0.293004	-0.868643
429	0.493959	10.5111	10.7189	9.64042	12.9954	13.368	11.0962	3.55717	4.34739	429	0.948659	7.42322	9.72106	1.08316	5.32076	4.3008	3.21754	5.35479	7.67276	429	2.20556	-1.33631	0.592248	0.594337	-0.29052	-0.808227
430	0.350444	11.2307	11.6509	10.0852	13.1339	14.2084	11.704	3.95531	3.62184	430	1.0403	7.57743	9.27711	1.07832	5.15594	5.07561	3.19047	5.33376	7.52814	430	1.40857	-1.42171	1.1231	0.272681	-0.180597	-0.73382
431	0.347652	11.0275	11.1922	10.1617	13.0819	12.7857	11.5097	3.33755	3.48119	431	0.721293	7.61048	9.42578	0.653705	5.75657	4.95473	3.29775	5.15128	7.45918	431	1.48728	-0.644082	0.442703	0.638806	-0.201712	-0.642242
432	1.33606	10.7964	11.5984	10.0143	13.6024	13.1827	11.3062	3.317	3.44368	432	1.0086	7.77296	10.0785	1.20288	5.19189	5.4207	3.18167	5.21	7.5079	432	1.42445	-1.01381	0.548226	0.695133	-0.34455	-0.798052
433	1.30032	10.7713	11.8892	9.93881	13.3005	13.2752	11.053	3.27589	4.05495	433	0.646067	7.64596	9.68717	-0.227575	5.39445	5.86838	3.34807	5.25213	7.54194	433	2.09643	-1.10111	0.533336	0.573091	-0.32095	-0.806319
434	1.19255	11.095	11.3772	10.0765	13.6821	12.9065	11.3044	4.07452	4.08191	434	0.57568	7.97187	9.47991	0.83875	5.79076	5.49933	3.31241	5.23359	7.71633	434	2.21416	-1.06343	1.17359	0.806798	-0.375601	-0.785969
435	1.54268	10.5313	11.3226	10.376	13.497	13.1349	11.7057	3.91832	4.0151	435	0.424254	8.01546	10.1879	1.11944	5.562	5.50027	3.55443	5.39288	7.70149	435	2.15529	-1.57914	1.2707	1.19219	0.200718	-0.340162
436	0.166165	10.8894	11.5738	9.76446	13.5581	14.0728	11.7163	4.09449	3.69627	436	0.701978	7.83943	9.82876	1.14169	5.94206	4.81158	3.36303	5.44922	7.46709	436	1.55077	-0.918397	1.15547	0.982202	-0.256363	-0.719193
437	0.208046	10.9827	11.4448	10.3248	13.5278	13.5176	11.735	4.05514	4.1956	437	0.51152	7.69209	9.61201	0.796632	5.36084	4.64323	3.36171	5.46241	7.75433	437	2.13347	-1.11495	1.10238	0.724284	-0.496082	-0.911889
438	1.49577	10.9307	11.7651	9.71393	13.2297	13.9936	11.8024	3.40449	4.27765	438	0.686466	8.30286	9.98639	1.31683	5.82063	5.74095	3.59583	5.1732	7.80266	438	2.21879	-0.577769	0.483488	1.14723	0.0578804	-0.347157
439	0.767587	10.3277	11.0417	10.2591	13.4616	13.06	11.5305	3.79617	4.55779	439	0.144578	7.87325	10.142	0.78708	5.86627	5.36791	3.38346	5.40822	7.69986	439	2.28294	-1.51712	1.21114	1.07707	0.237359	-0.260031
440	1.18976	10.8772	12.0232	10.611	13.3087	13.373	11.5296	4.00523	4.35736	440	0.660734	7.77385	9.658	0.937059	5.9276	5.29259	3.32366	5.38643	7.6366	440	2.28956	-0.852561	1.10432	0.587914	-0.358212	-0.872459
441	0.478882	10.7603	11.7959	10.3951	13.6711	12.9187	12.0337	3.22245	4.51794	441	0.81201	7.70085	9.48011	1.07627	6.165	5.35371	3.39759	5.21436	7.74251	441	2.35636	-0.937003	0.590306	0.791975	-0.26071	-0.700114
442	0.430858	10.5041	11.4956	10.2541	13.845	12.9292	12	3.758	4.09949	442	0.558227	7.52769	9.41615	1.24718	5.76599	5.09004	3.4363	5.4366	7.68938	442	1.6275	-0.770505	0.943127	0.562715	-0.26692	-0.769434
443	1.34946	10.8233	11.4979	10.1142	13.7527	12.9722	11.485	3.31289	3.88323	443	0.437643	7.78585	9.32043	1.21195	5.23892	5.78116	3.43088	5.40063	7.66261	443	1.67181	-1.30959	0.426519	1.58105	-0.248289	-0.798052
444	0.411313	9.51213	11.8667	10.5495	13.593	13.0138	11.9662	3.52194	4.62343	444	0.278712	7.63769	9.11931	1.37164	5.33315	5.11529	3.46896	5.34611	7.75912	444	2.30808	-1.54765	0.442056	1.29002	-0.113525	-0.498515
445	1.31875	10.9261	11.9139	10.7579	13.7098	13.7424	11.7142	3.33637	4.44527	445	0.635213	7.93141	9.44737	0.906159	5.18454	5.2707	3.44518	5.41146	7.70344	445	2.25979	-0.802946	0.584479	1.26384	-0.217238	-0.638426
446	1.38185	10.9885	11.9796	10.3229	13.9462	12.8207	11.9545	3.40332	4.06843	446	0.604612	7.54121	10.1184	1.05482	5.65772	5.57024	3.49191	5.33657	7.67162	446	1.62353	-1.08108	0.5547	0.847808	-0.311014	-0.645422
447	1.94251	10.7607	11.6606	9.86573	13.2812	13.5722	12.4974	3.66111	4.81273	447	0.384589	7.98508	9.95724	1.0338	6.06493	5.04137	3.55687	5.38959	7.8376	447	2.39803	-1.55338	0.603253	1.25939	0.428638	0.0350541
448	0.326991	9.16008	12.0949	10.2272	13.5327	13.6088	12.1753	4.21546	4.43062	448	0.606684	8.10935	10.2217	0.994178	5.69777	5.19506	3.5995	5.64455	7.71248	448	1.65064	-1.14739	1.2461	0.986649	-0.109799	-0.516958
449	0.62128	9.48157	11.5466	10.43	13.5012	13.0007	12.2728	4.07217	2.68707	449	0.660422	7.27207	9.56582	0.773874	6.46137	5.93942	3.56474	5.42905	7.60711	449	1.55805	-0.902177	1.28883	0.414981	-0.166313	-0.608536
450	1.30479	10.3831	11.2065	10.7936	14.0529	13.0394	12.4786	2.91063	3.97876	450	0.555471	7.83888	9.55835	0.700247	6.19725	5.80632	3.41822	5.45786	7.73326	450	2.23929	-1.6216	0.552758	0.768259	-0.263194	-0.691211
451	1.19087	9.49004	10.7524	9.88763	13.4569	12.7074	11.3268	3.61355	4.4441	451	0.473294	7.84476	9.88581	0.960201	6.4053	5.75049	3.32984	5.47279	7.63989	451	2.21416	-1.46226	1.07001	1.32708	-0.271268	-0.794236
452	1.05238	10.0034	10.9669	9.49491	12.8081	12.1533	11.2487	2.94763	3.93012	452	0.00792855	7.65906	9.65764	1.35158	5.59633	5.76968	3.39098	5.21286	7.74418	452	2.15463	-1.18651	0.420692	1.05434	-0.397959	-0.83303
453	0.849117	9.4411	10.4985	9.55823	12.6277	12.3029	11.5007	2.54303	3.97876	453	0.713024	7.49542	9.65906	1.49011	6.06714	5.63758	3.37957	5.15286	7.56178	453	2.06931	-1.18508	0.497083	1.44962	-0.366907	-0.685487
454	0.749159	9.9794	10.3021	9.07877	12.2645	12.0822	11.2822	3.16021	3.87796	454	0.381833	7.74256	9.75875	1.19509	6.31985	5.91543	3.38615	5.1732	7.4397	454	2.04815	-1.07535	1.06872	1.44319	-0.650098	-1.06325
455	0.768704	9.04094	10.0933	8.9981	12.2014	11.8991	9.90486	3.19485	3.15651	455	0.643663	7.84325	9.95215	1.21214	6.02248	5.49816	3.32512	5.28029	7.42674	455	1.30804	-1.30005	1.01045	1.41355	-0.619047	-1.05498
456	0.396235	8.71202	9.46244	8.60777	11.7208	11.8735	10.1504	2.38389	3.67049	456	0.445681	7.72967	9.20655	0.579373	5.72445	5.34894	3.24972	5.07399	7.53447	456	1.94034	-1.26475	0.359839	0.936745	-0.763748	-1.22605
457	0.090219	7.86028	9.90957	9.02673	10.9877	11.4039	9.3645	2.79671	3.65173	457	0.319131	7.39555	9.33581	1.20515	5.38223	5.41233	3.20558	5.20509	7.52213	457	1.96812	-1.35539	0.965785	0.889806	-0.734559	-1.14083
458	0.0818426	7.81011	9.21422	8.73485	11.2833	11.1151	9.48417	2.92531	3.21101	458	-0.0993265	7.59238	9.67526	1.0603	6.15207	5.67383	3.07808	5.31105	7.40906	458	1.68901	-1.08155	0.835015	1.64429	-0.324056	-0.688667
459	0.461571	8.60362	8.86297	8.3341	11.2847	10.7982	9.36427	2.72977	2.74802	459	-0.351409	7.51512	9.52148	0.702074	5.24074	5.03323	3.21455	5.2707	7.18028	459	1.0157	-1.02431	0.635622	1.26878	0.179603	-0.229505
460	0.0209744	8.36059	8.79912	8.20811	10.854	10.6556	8.97778	1.98986	3.22097	460	0.187995	7.73035	9.46693	0.702395	5.52966	4.78635	3.13256	5.03163	7.26826	460	1.87684	-1.49374	0.223889	1.10276	-0.444536	-0.851473
461	0.318056	7.896	9.09707	8.33237	10.8885	10.0957	8.91702	1.873	1.1545	461	-0.00997748	7.52268	9.19572	0.861669	5.81016	4.95385	3.25994	4.90789	7.22441	461	1.08118	-0.858763	-0.048657	0.430792	0.149172	-0.218058
462	-0.376623	7.61436	8.55996	7.64603	10.5172	8.93753	8.71003	1.79431	1.52666	462	0.00652021	7.42479	9.25723	0.870868	5.80106	5.00508	3.05119	4.9217	7.22074	462	1.64601	-1.48468	0.175336	1.48569	-0.307288	-0.751627
463	-0.0655813	7.2014	7.59048	7.93119	10.3253	9.098	8.33693	2.21183	1.42175	463	-0.305578	7.58384	9.47662	0.691016	5.69878	3.91232	2.97475	5.08651	7.23371	463	1.47603	-2.0667	0.731434	1.25593	-0.490493	-0.809499
464	-0.23255	7.39467	8.15224	7.26871	9.62379	8.82934	8.25145	1.63635	1.52138	464	0.185238	7.3393	9.17057	0.772496	5.75029	4.52024	3.14886	4.86867	7.19764	464	1.45487	-1.63686	-0.0771416	1.36908	-0.593584	-0.977392
465	-0.263822	6.88734	8.48369	7.64647	9.37044	8.81168	8.16066	1.48308	1.49032	465	-0.0708479	7.07937	9.68617	0.689253	5.65769	4.81271	3.08217	4.91752	6.96964	465	1.41122	-1.24424	-0.180075	1.48914	-0.540175	-0.791692
466	-0.548618	6.73269	7.73819	7.22014	9.22104	8.35743	8.08928	1.96754	1.37311	466	0.165944	6.8559	9.22363	0.867759	5.57422	4.31892	2.96893	4.83465	6.89439	466	1.51836	-1.34537	0.60649	1.26927	-0.490493	-0.76689
467	-0.653602	6.3796	7.41643	6.85474	8.56424	8.53216	7.59559	1.93583	1.26	467	-0.702921	7.04978	9.35408	0.506644	5.47259	4.79497	3.06538	4.81015	7.02503	467	1.38013	-1.76758	0.413571	0.85522	-0.468135	-0.825398
468	-0.641316	5.65692	6.9358	6.34232	8.89987	8.23996	7.39437	1.84658	1.43933	468	-0.823706	7.17904	8.93364	0.876157	5.45516	4.02931	2.91567	4.8163	6.82325	468	1.40923	-1.7652	0.561821	1.34882	-0.484282	-0.762438
469	-0.857985	5.64205	7.22637	6.35425	8.85209	8.00163	7.65681	1.31748	1.6468	469	-0.45292	6.74803	8.90813	1.09274	5.19839	4.11688	3.04997	4.66345	6.84694	469	1.4886	-1.50949	-0.323793	1.34042	-0.540175	-0.946866
470	-0.845699	4.95158	6.82476	6.81224	8.29784	7.77281	7.12824	1.76025	1.6257	470	-0.843	7.15622	9.40758	0.43385	5.62122	4.48221	2.80752	4.72896	6.78511	470	1.44759	-1.32915	0.525568	1.43529	-0.570606	-0.975485
471	-1.10816	4.81365	6.75775	5.97302	8.37195	7.43082	6.77293	1.74322	1.13575	471	-0.941694	7.30928	9.06884	0.36314	5.61014	4.7312	2.86956	4.80903	6.60088	471	0.806036	-1.55528	0.445293	0.925381	-0.66935	-1.01046
472	-0.917736	5.0511	6.48403	6.1619	8.361	6.9872	6.61584	1.95991	0.666311	472	-0.371025	7.02163	8.49155	0.678771	5.53993	4.8153	2.95018	4.6965	6.54907	472	0.669126	-1.51998	0.49773	1.06373	-0.673077	-1.05307
473	-1.07745	5.37032	6.59972	6.32888	7.84963	7.00055	6.41416	1.772	1.16681	473	-0.256185	7.1469	8.77183	0.940456	5.45266	4.14127	2.96761	4.47902	6.64521	473	1.39667	-0.598283	0.423282	1.01975	-0.675561	-1.00219
474	-1.21984	5.36826	6.38037	5.78046	7.36787	6.81835	6.10967	1.71797	1.46043	474	-0.297812	6.74872	8.25773	0.842853	5.04696	4.67066	2.85399	4.54317	6.69447	474	1.42378	-1.5424	0.131962	1.45505	-0.750706	-0.95259
475	-1.22599	4.19276	6.21917	6.20332	7.11405	6.85525	6.00571	1.73383	1.1504	475	-1.03913	6.53595	8.77863	0.699542	5.61541	4.47177	2.91589	4.60422	6.66842	475	1.37021	-1.38974	0.300927	1.42392	-0.684876	-1.05371
476	-1.47337	4.18058	5.9758	5.30555	7.41239	5.87952	5.49724	1.82426	1.20432	476	-0.862978	6.41402	8.86357	1.04787	5.04016	3.80545	2.98473	4.47198	6.56834	476	1.33582	-2.07052	0.157857	1.13241	-0.905964	-1.07406
477	-1.24665	4.31768	5.72105	5.74121	7.00847	6.06941	5.76245	1.68802	1.33736	477	-0.747686	6.64325	8.65889	0.719191	4.94002	4.09717	2.8981	4.31263	6.65715	477	1.25976	-1.52952	0.12484	1.17688	-0.958752	-1.18853
478	-1.0646	4.07507	5.56091	5.31726	6.5605	5.74123	5.45612	1.09786	0.875537	478	-0.842306	6.63873	8.34796	1.02473	5.40696	4.29058	3.01809	4.22254	6.41297	478	1.14401	-1.21561	-0.371699	0.657582	-0.224069	-0.406301
479	-1.46108	4.13928	5.8441	4.9844	6.35633	5.53549	5.37249	1.12311	0.906598	479	-0.52716	6.27861	8.45767	0.461672	5.42195	4.27606	2.80515	4.23044	6.35548	479	1.13607	-1.29337	-0.471395	1.05335	-1.11153	-1.4232
480	-1.54261	3.99516	5.70693	4.53421	6.4393	5.53685	5.14078	1.6798	0.946451	480	-0.965063	6.41921	8.00933	0.793202	5.29964	3.86258	2.76019	4.34237	6.3552	480	1.15129	-1.7089	0.0613974	0.880913	-0.952542	-1.32208
481	-1.69618	3.54482	4.97092	5.06745	6.18828	5.22179	5.09896	1.72326	0.785868	481	-0.843614	5.80849	8.40188	0.354133	4.78033	3.46379	2.76966	4.40257	6.27841	481	1.06729	-1.27238	0.222595	0.883877	-0.969931	-1.29792
482	-1.56607	3.12463	5.14454	4.34533	5.89834	5.2734	4.82867	1.63928	0.793487	482	-0.835415	6.63987	7.96078	0.392212	5.60991	3.89306	2.67998	4.28974	6.22529	482	1.07324	-1.90307	0.215473	0.635841	-0.986078	-1.2871
483	-1.70846	3.32988	4.68035	5.32008	5.92398	4.9778	4.16865	1.07848	0.736053	483	-1.02628	6.02841	8.14331	0.441799	5.89796	3.90551	2.59014	4.24907	6.1596	483	1.11028	-1.48849	-0.397594	1.07509	-0.956889	-1.21461
484	-1.91061	2.95387	5.25748	5.11212	5.82655	5.25438	3.70754	1.19651	0.693856	484	-1.00424	5.88803	8.16889	-0.142216	4.84293	3.27307	2.58532	3.99483	6.18196	484	1.09242	-1.59679	-0.360693	1.03161	-0.968689	-1.25276
485	-1.59455	2.79055	4.49218	4.23279	5.6345	4.47466	4.75682	0.94929	0.71261	485	-1.24639	5.80403	8.35775	0.103346	4.31677	4.16393	2.63802	4.0639	6.12908	485	1.01636	-1.40644	-0.538075	0.607184	-0.912796	-1.15228
486	-1.64927	2.53162	4.43381	4.60664	5.56994	4.6125	3.70245	1.57469	0.583089	486	-1.66534	6.12098	7.98458	0.128796	4.5506	4.05473	2.60311	4.18063	6.07425	486	1.13475	-1.46941	0.0866451	0.834962	-1.07799	-1.3577
487	-1.91173	2.55144	4.78865	4.05042	5.41867	3.68385	4.22271	1.00097	0.900737	487	-1.55879	5.73266	8.16467	0.632678	4.85012	4.26017	2.53011	4.03357	6.0789	487	1.02297	-1.39356	-0.655898	1.21294	-0.864355	-1.16945
488	-2.40314	2.96007	3.75574	4.11135	5.10589	4.12407	3.4615	0.923452	0.676274	488	-1.52074	6.0176	7.85343	0.476449	5.02489	3.85198	2.38914	3.97686	5.9765	488	1.14401	-0.938434	-0.624824	1.00048	-1.70213	-1.87091
489	-1.7939	2.68214	3.70433	3.70497	4.84764	3.39708	3.56846	1.21061	0.863229	489	-1.50542	5.53352	7.8843	-0.00634148	4.47295	3.54962	2.54275	4.00619	5.90596	489	1.05009	-0.823937	0.240074	0.307268	-1.28479	-1.45373
490	-1.84751	2.53451	4.55139	3.58202	4.93248	3.23525	3.00223	1.50129	0.0644204	490	-0.946583	6.16138	7.59979	0.254542	3.95407	4.27537	2.40564	4.02058	5.77202	490	0.479965	-1.28479	0.0581605	1.29793	-1.09662	-1.35197
491	-1.93016	2.35136	3.52628	3.70909	5.0609	3.42039	3.35592	1.40263	0.948795	491	-1.43256	5.34192	7.86587	0.0826071	5.09542	4.5551	2.38322	3.89898	5.8237	491	1.08647	-1.44174	-0.1244	0.968367	-1.2997	-1.46899
492	-2.07423	2.30738	4.01071	3.95327	4.56003	3.49418	2.94124	1.26052	0.320532	492	-1.59126	6.00938	8.18116	0.364967	4.55444	4.32135	2.34171	3.93396	5.77976	492	0.446234	-2.1416	-0.0596624	1.05088	-1.36926	-1.59364
493	-2.18424	1.95099	3.9968	3.49658	4.43743	3.75333	2.38333	1.31044	0.925352	493	-1.5597	5.20447	7.56055	-0.306523	5.2331	4.05878	2.37973	3.84144	5.74525	493	1.02562	-1.33965	-0.121811	0.501447	-1.25064	-1.35134
494	-2.21663	0.897938	3.37984	3.38316	4.22347	3.03902	2.506	1.31455	0.720229	494	-1.57128	5.39291	7.78706	-0.101124	5.09301	3.68652	2.27279	4.01808	5.69358	494	1.06597	-1.25616	-0.122458	0.260329	-1.39161	-1.6089
495	-2.00108	2.03978	3.42493	2.97895	3.61771	3.05781	2.61481	1.25406	0.345732	495	-2.21644	5.81541	7.65403	-0.220876	4.41461	4.00129	2.30462	3.95173	5.46938	495	0.421762	-1.40167	-0.231218	0.915993	-1.45744	-1.74372
496	-1.57612	1.36727	3.69063	2.86272	3.76082	3.19927	3.12514	1.30809	0.75129	496	-2.08161	5.62211	8.10828	0.408464	4.36991	4.12797	2.46609	3.92541	5.56701	496	1.10697	-1.75231	-0.0648414	0.993566	-0.763126	-0.899805
497	-1.83523	1.69578	2.07427	3.13942	3.35667	3.41632	2.07816	0.814228	0.511003	497	-1.9853	5.59818	7.78546	-0.0385553	4.16544	3.17334	2.27777	3.6188	5.59829	497	1.06597	-1.19462	-0.876654	0.644241	-0.740769	-0.878183
498	-2.2278	1.63425	3.6034	2.76253	3.45549	2.85773	1.96242	1.20297	0.699131	498	-2.29842	5.53076	7.7682	0.475584	4.59263	4.29908	2.25651	3.81903	5.57856	498	0.96411	-1.81338	-0.283008	0.173368	-1.2879	-1.54976
499	-1.86091	1.50375	2.5943	2.96377	3.23873	2.43856	2.01162	0.498886	0.709094	499	-2.46791	5.04817	7.28954	0.369358	4.26701	4.06458	2.22147	3.67441	5.51667	499	0.852995	-1.77235	-0.849464	0.36903	-0.684876	-0.89599
500	-1.986	0.702813	3.21653	2.76514	3.27579	2.77964	1.99476	0.458367	0.730192	500	-2.51431	5.06756	7.3548	-0.246743	4.54036	3.84903	2.15688	3.55351	5.37504	500	1.02364	-1.41216	-0.745884	0.533564	-0.946953	-1.14719
501	-2.30207	0.578511	3.01067	3.50634	2.91173	2.59473	1.96565	0.639234	0.0679368	501	-2.18657	5.18942	7.43366	0.248709	4.97555	4.09814	2.08164	3.47414	5.29367	501	0.212759	-1.27477	-0.790553	0.71292	-1.41708	-1.57901
502	-2.58798	0.654496	2.72431	2.88202	3.18676	2.27673	1.56876	1.05734	0.34163	502	-2.36108	5.02567	7.34907	0.264255	4.06016	3.5766	2.03379	3.64277	5.40201	502	0.856963	-1.57914	-0.108216	0.595326	-1.3469	-1.65532
503	-1.65039	0.752988	2.76203	2.35312	2.7008	1.49632	1.87139	0.697369	-0.071547	503	-2.24008	5.11518	7.12912	-0.48551	4.1266	3.48419	2.12677	3.1965	5.23899	503	0.200193	-2.24799	-0.883775	0.782094	-0.845103	-0.974849
504	-1.49068	1.01914	2.57745	3.07393	2.65698	1.90418	1.81942	1.3674	0.60829	504	-2.7465	4.89037	7.24564	-0.197733	4.3847	4.66541	2.15911	3.4476	5.26303	504	0.854979	-1.97081	-0.0609572	0.304797	-0.789831	-1.00092
505	-2.32887	1.01026	2.59114	2.5871	2.41738	1.3603	1.66348	0.6316	0.713782	505	-2.42655	5.25147	7.21119	-0.704244	4.30917	4.05275	1.96506	3.38741	5.13462	505	0.974693	-1.42171	-0.71222	0.748495	-1.24567	-1.41684
506	-2.0156	1.36314	2.78437	2.53462	2.45793	1.34717	1.72585	0.5764	0.846819	506	-2.23205	4.9235	7.20174	0.258773	4.36452	4.27285	1.92023	3.33217	5.22334	506	0.850349	-1.4842	-0.853996	0.526646	-1.41956	-1.68903
507	-2.54833	1.09038	2.69123	2.57105	2.3379	1.84669	1.42345	0.406691	0.753635	507	-2.67598	5.16137	7.01052	-0.385791	3.98316	3.68178	1.89456	3.30557	5.17097	507	0.884742	-1.71081	-0.819037	0.616572	-1.49657	-1.65914
508	-2.02342	0.451732	3.22602	2.5845	2.37309	1.28787	1.37886	0.969256	-0.0662724	508	-3.04797	4.68195	7.30038	-0.942241	3.61295	3.69469	1.83819	3.37972	5.0487	508	0.247814	-1.55672	-0.218917	0.259341	-1.45682	-1.64261
509	-1.40412	0.798207	2.47146	2.54568	2.43183	1.38746	0.810092	1.08729	0.760081	509	-3.25088	4.45487	6.79342	-0.0680766	3.87759	3.25939	2.00581	3.23318	5.09718	509	0.886726	-1.33249	-0.244165	0.47526	-0.803494	-1.06134
510	-2.33892	0.920031	2.49611	2.25467	2.02255	1.05859	0.9025	0.364998	0.811069	510	-2.97901	4.79925	6.24423	-0.116798	4.51732	3.21653	1.89223	3.20161	5.20349	510	1.0739	-1.42982	-0.896075	-5.92914e-05	-1.35435	-1.57138
511	-2.28085	1.05156	2.0041	2.56693	1.6748	1.45468	0.574914	1.17655	0.267199	511	-3.26667	5.32791	7.16566	-0.604333	4.41922	4.03907	1.80365	3.38112	4.80714	511	0.362897	-1.76615	-0.158711	0.748495	-1.33882	-1.55548
512	-2.0653	0.800479	2.62928	2.61117	1.63635	1.09345	0.594551	0.370283	0.668069	512	-2.79265	4.76036	6.70746	-0.423615	4.20178	3.45459	1.79679	3.22593	4.88096	512	0.924426	-1.72703	-0.762715	0.756401	-1.33013	-1.53958
513	-2.15967	0.44657	2.44069	2.51771	1.87525	1.24238	1.12682	0.342683	-0.167076	513	-2.90938	4.3695	6.80534	-0.328993	3.77446	3.77542	1.65854	3.21549	4.72597	513	0.226649	-1.35444	-0.835222	0.485142	-1.37298	-1.61399
514	-1.86594	0.615471	2.42721	1.65464	1.64753	1.10047	0.575608	0.697369	0.600671	514	-2.70494	4.78798	6.67436	-0.487818	3.93684	3.27791	1.9561	3.268	4.76533	514	0.904584	-1.40548	-0.277182	1.00542	-0.961236	-1.17454
515	-2.56174	0.60618	2.55216	2.14364	1.75125	0.930262	0.862764	0.190004	0.737225	515	-2.73295	5.00362	6.66157	-0.609493	3.55126	3.41253	1.8445	3.06037	4.9096	515	0.866884	-1.83819	-0.831985	0.940698	-1.62077	-1.82703
516	-2.26968	-0.0677754	1.92508	2.34119	1.71	0.806683	0.23855	0.869427	0.747188	516	-3.49017	5.61084	6.58115	-0.59055	3.64061	3.48892	1.81677	3.20564	4.84173	516	0.845058	-1.87492	-0.272003	0.872019	-1.52514	-1.7698
517	-2.43944	-0.1291	2.46408	1.67502	1.40817	0.663414	0.540724	0.807768	0.935315	517	-3.20999	4.44005	6.63824	-0.503268	4.02125	2.89601	1.87876	3.14935	4.88315	517	0.849688	-2.00612	-0.31214	-0.225367	-1.49781	-1.68903
518	-2.41208	0.579544	2.18995	1.32351	1.36855	0.560658	0.302081	0.256948	0.941762	518	-3.29587	4.48009	6.77686	-0.796301	3.45586	3.63198	1.82606	2.96118	4.78617	518	0.931702	-1.98846	-0.959518	0.130876	-1.5065	-1.6178
519	-2.31547	0.0298902	1.96954	2.10656	1.77852	0.34315	-0.17867	-0.720201	0.209765	519	-3.29129	4.17175	6.26205	-0.864543	4.08902	3.82584	1.73605	3.02264	4.56392	519	0.190933	-1.98751	-0.822274	0.415475	-1.48539	-1.76725
520	-2.3339	-0.607311	2.11641	1.19882	1.63448	0.83407	0.41528	-0.0448878	0.137679	520	-3.16579	4.04289	6.24073	-0.589396	4.13872	2.60672	1.65768	3.12114	4.60861	520	0.17043	-1.4489	-0.296603	0.244024	-1.63941	-1.91734
521	-2.37243	-0.33744	2.32396	1.48658	1.12032	0.0511788	0.19997	-0.521717	0.710266	521	-3.26639	4.4205	6.53308	-0.368579	3.9711	3.78243	1.7331	2.96461	4.59699	521	0.739234	-1.39117	-0.863059	0.465873	-1.64313	-1.82004
522	-2.31659	0.0364976	2.64993	1.56334	1.02989	0.157782	-0.0827973	0.388487	0.610634	522	-3.64728	4.31579	5.86006	-0.0670509	4.42273	3.45144	1.54619	3.00049	4.74344	522	0.783548	-1.60299	-0.890896	0.201037	-1.60897	-1.95295
523	-1.71014	-0.235232	2.0237	1.53624	1.32216	-0.00178352	-0.467675	0.852398	0.777077	523	-3.81493	4.24998	6.54597	-0.503172	3.27485	3.3588	1.6337	3.17045	4.72809	523	0.783548	-2.35962	-0.0803785	0.747013	-1.03576	-1.30046
524	-2.39868	-0.374194	2.50264	1.61669	1.25947	0.131754	-0.119298	-0.383719	-0.000632952	524	-3.61833	4.45991	6.4859	-0.816399	3.79386	3.82811	1.56798	3.03067	4.49687	524	0.0698968	-1.23946	-0.765305	0.551845	-1.50526	-1.79269
525	-1.47337	-0.0301958	1.91076	0.344638	1.26972	0.290414	-0.312892	0.604	0.53972	525	-4.09278	4.25361	5.85692	-0.497915	3.93541	2.67001	1.71797	3.14726	4.6375	525	0.531554	-1.92597	-0.285597	0.205978	-0.983594	-1.26421
526	-2.36126	-0.287885	2.04582	1.07348	0.844129	-0.0952597	-0.367644	-0.570457	0.832168	526	-3.81344	4.04127	6.13153	-0.281682	3.52893	3.2081	1.53313	2.86949	4.66708	526	0.706825	-2.12729	-0.7789	0.519729	-1.70399	-1.98221
527	-2.49863	-0.571796	2.01632	1.35994	0.500811	-0.431819	-0.211475	-0.519368	0.523311	527	-3.87166	4.3493	6.13099	-0.483042	3.75726	3.28517	1.35275	2.86725	4.59734	527	0.581821	-1.49947	-0.805442	0.89623	-1.6214	-1.92243
528	-2.3043	-0.256912	1.80561	1.73683	0.351876	-0.125136	-0.423782	-0.508798	0.536204	528	-4.16839	3.99502	6.10921	-1.02141	3.71192	3.11063	1.442	2.91815	4.49069	528	0.622166	-1.16123	-0.835869	0.640782	-1.66673	-1.87537
529	-2.49752	-0.935823	2.38823	1.60086	0.536704	-0.149354	-0.655494	0.768424	0.672758	529	-3.96391	4.00722	6.04728	-0.628277	3.56598	2.74501	1.57163	2.95364	4.59671	529	0.588435	-1.9961	-0.156122	0.383853	-1.59407	-1.81304
530	-2.35512	-0.830724	1.89622	0.881563	0.723863	-0.786485	-0.536288	0.556434	-0.525749	530	-4.01263	3.85398	5.88758	-0.838676	3.40616	3.15836	1.67656	2.98153	4.5986	530	0.749817	-1.53668	-0.270708	0.118524	-1.57792	-1.8264
531	-2.28197	-0.64964	1.67223	1.31158	0.438813	-0.127626	-0.8745	-0.773051	-0.549191	531	-3.66151	3.70023	6.1118	-0.860248	4.19303	2.53549	1.49438	2.66095	4.44625	531	0.772304	-1.60108	-0.927797	1.03853	-1.70896	-1.93451
532	-2.36238	-0.862316	1.66886	0.662976	0.481466	-0.783996	-0.800805	-0.469454	-1.23489	532	-3.9701	3.74475	5.94229	-1.22717	3.86179	3.18556	1.49548	2.6271	4.3416	532	-0.0352659	-1.48277	-0.964697	0.45352	-1.64562	-1.88681
533	-2.25349	-0.988889	1.03588	1.01926	0.367259	-0.995392	-1.00687	0.166515	-0.645892	533	-3.97249	3.59597	6.18999	-1.17065	3.86494	3.33449	1.49731	2.73923	4.33317	533	0.820586	-0.936048	-0.297898	0.293927	-1.69281	-1.95804
534	-2.39868	-0.559614	1.86271	1.19166	0.517126	-0.9628	-0.918163	0.135979	-1.27064	534	-4.16932	3.5419	5.91702	-0.50112	3.7401	3.46107	1.54536	2.78794	4.20521	534	0.0302128	-1.96556	-0.255171	0.720826	-1.84373	-2.11576
535	-2.31938	-0.993225	1.91413	1.47747	0.509435	-1.1244	-1.06324	0.0719707	-0.559154	535	-4.29954	3.43149	5.77253	-0.869127	3.66333	3.33562	1.62402	2.81049	4.38669	535	0.728652	-1.49756	-0.292071	0.178803	-1.85118	-2.10495
536	-2.30654	-1.19248	1.85112	0.989121	0.295006	-0.44291	-0.470448	-0.501164	-0.414982	536	-3.98787	3.80544	5.28011	-0.985129	3.0249	3.74738	1.4114	2.63405	4.29328	536	0.653252	-1.95268	-0.88507	0.945145	-1.86981	-2.19335
537	-2.03793	-1.25133	2.29235	1.1407	0.243264	-0.855291	-1.12677	-0.45125	-0.682228	537	-3.87673	4.0041	5.19527	-0.912944	3.54167	3.19182	1.52458	2.46541	4.10806	537	0.566609	-1.37877	-0.824216	0.000434804	-1.39534	-1.69475
538	-1.35219	-1.25442	1.92424	0.931872	-0.0347933	-1.26903	-0.91516	0.125996	-0.487068	538	-4.33741	3.62077	5.44536	-0.85278	3.78102	3.87574	1.47479	2.53275	3.98509	538	0.532216	-1.37066	-0.276534	0.68278	-1.31026	-1.65532
539	-2.63992	-1.51211	1.22637	0.898911	0.171011	-0.932245	-0.730806	-0.437744	-0.0328666	539	-4.10553	3.63099	5.42172	-1.08052	3.45768	2.88285	1.50779	2.45439	4.22288	539	1.187	-1.59011	-0.83069	0.489589	-1.90459	-2.23977
540	-2.37634	-0.891843	1.73587	0.58968	0.554651	-1.37993	-0.865259	0.00502668	-0.441941	540	-4.52829	3.70394	5.28692	-0.89961	3.15173	2.72034	1.46621	2.46162	4.15095	540	0.597033	-1.40787	-0.26035	0.955521	-1.83441	-2.22006
541	-2.47295	-0.895146	1.79655	0.901513	0.163087	-1.1287	-1.12793	-0.738405	-0.31242	541	-4.33559	3.25408	5.30816	-1.07616	3.26737	3.06877	1.44642	2.46066	4.11746	541	0.758415	-1.72608	-0.870828	0.279599	-1.80025	-2.05343
542	-2.05413	-0.728516	0.725083	0.987603	-0.0804758	-0.843748	-1.16928	0.204684	-0.840466	542	-4.69973	3.12383	5.4626	-1.21646	3.23211	3.1558	1.66	2.40794	3.92955	542	0.154556	-1.54956	-0.828748	0.728237	-1.16059	-1.4321
543	-1.98377	-0.913936	1.07128	1.05331	-0.177202	-1.22603	-1.23628	0.258709	-0.836364	543	-4.53312	3.28179	5.354	-1.62562	3.10193	2.80963	1.65219	2.47888	3.89903	543	0.042118	-1.74945	-0.0985051	0.493048	-1.20282	-1.54912
544	-2.51874	-0.788602	1.17643	0.738007	-0.0569353	-1.53814	-1.09097	0.174149	-0.511683	544	-4.52829	3.56841	5.22908	-0.981218	3.71481	3.4647	1.51726	2.38801	3.87987	544	0.575868	-2.10344	-0.402126	0.961944	-1.83565	-2.24867
545	-2.36014	-1.2185	1.45857	1.37425	0.143741	-0.846464	-0.934334	-0.38137	-0.571462	545	-4.58433	3.48027	5.19353	-0.91256	3.64916	3.37145	1.48762	2.28317	3.83951	545	0.582482	-1.79716	-0.639066	0.748495	-1.88658	-2.30527
546	-2.52823	-0.901134	1.51378	0.426391	-0.412373	-1.39419	-1.29496	-0.36434	-0.423187	546	-4.45241	3.27133	5.51468	-0.97641	3.50582	2.89138	1.50529	2.20304	3.81464	546	0.519649	-1.95221	-0.703157	0.47279	-1.98284	-2.38223
547	-2.0491	-0.761759	2.08902	0.416416	-0.245725	-1.07054	-0.976611	-0.483547	-0.480621	547	-4.74073	3.3307	5.5476	-0.846209	2.70552	2.32794	1.52881	2.08208	3.88157	547	0.623489	-1.80622	-1.01001	0.836938	-1.75243	-2.20861
548	-2.60753	-0.921782	1.18464	0.521155	-0.191186	-0.937677	-1.52043	-0.278605	-0.264363	548	-4.69329	3.67564	5.6816	-0.998143	3.4529	2.28089	1.62767	2.06118	3.76976	548	0.700211	-1.42361	-0.794437	0.545916	-1.79094	-2.24041
549	-2.64382	-0.848688	1.05569	0.667313	-0.612351	-1.75225	-1.55786	0.373806	-0.390953	549	-4.80619	3.62845	5.39137	-1.13706	3.40077	3.14646	1.59457	2.241	3.76377	549	0.608277	-1.92549	-0.1121	0.762824	-1.87602	-2.42674
550	-2.48858	-1.0021	1.20614	0.455883	-0.158089	-1.19366	-1.05308	0.215255	-0.893798	550	-4.71685	3.29504	5.6419	-1.0976	3.47962	2.71515	1.50529	2.18547	3.60583	550	0.0573302	-1.8692	-0.185254	0.72132	-2.05985	-2.49924
551	-2.81694	-0.965969	1.23416	0.696588	-0.285581	-1.3487	-1.94435	-0.278605	-0.857462	551	-4.75791	3.02915	5.38778	-1.08443	2.64172	3.12256	1.53795	1.97815	3.62273	551	0.0963528	-2.05478	-0.896723	0.657582	-1.90148	-2.3924
552	-1.94133	-1.50881	1.73081	0.496651	-0.0849042	-1.72804	-1.50795	-0.323821	-0.704499	552	-4.59728	2.87408	5.27233	-1.28925	3.31587	3.44891	1.5014	2.11438	3.60075	552	0.114211	-1.69697	-0.848169	0.870042	-1.62823	-1.96058
553	-2.66114	-0.908567	1.13049	0.616787	-0.228478	-2.03472	-1.56063	-0.449488	-0.830503	553	-4.60614	3.36746	5.19385	-1.43641	3.24192	2.34428	1.44312	2.15098	3.61399	553	0.112888	-1.05245	-0.901254	0.621513	-1.57109	-1.97521
554	-2.69185	-1.06694	1.57889	0.290425	-0.36739	-2.02408	-1.31806	-0.346136	0.0110884	554	-4.66977	3.31943	5.14625	-1.45353	3.0223	2.70652	1.49298	2.09928	3.65274	554	0.706825	-1.96795	-1.14273	0.275152	-1.64437	-2.07951
555	-2.68794	-0.950483	1.02724	0.736489	-0.233838	-1.80069	-1.61076	0.158881	-0.545089	555	-5.17803	2.24232	5.14919	-1.03782	2.80222	2.95486	1.38144	2.23706	3.54453	555	0.162493	-2.01613	-0.332209	0.512317	-1.60773	-2.0369
556	-2.10271	-1.46607	1.32498	0.264186	-0.45083	-2.06301	-2.18784	0.0584645	-0.769552	556	-5.09806	2.87228	4.89663	-1.26528	3.24056	2.61288	1.61135	2.17094	3.47493	556	-0.0465097	-1.64068	-0.361988	0.57902	-0.936395	-1.44419
557	-2.82699	-1.47784	1.78918	0.780944	0.207138	-1.27559	-1.21433	-0.199916	-0.239162	557	-5.14904	2.80499	4.67884	-1.61184	2.73354	2.59482	1.40118	2.28346	3.60498	557	0.649284	-1.84868	-0.325088	0.0864074	-1.46614	-1.86074
558	-2.77003	-1.60131	1.21899	0.242501	0.07312	-1.43652	-1.0041	-0.905765	-0.405019	558	-4.76186	2.55524	5.2383	-1.51158	3.19245	2.62229	1.37564	2.06311	3.54953	558	0.571238	-2.09103	-1.13431	-0.10629	-1.54004	-1.86583
559	-2.34283	-0.810076	1.03314	0.403839	-0.576224	-2.04853	-1.14826	-0.0266837	-0.316523	559	-4.92746	2.8337	5.05024	-1.9936	3.30761	2.43273	1.58991	2.22728	3.64471	559	0.49187	-1.75041	-0.350983	0.457967	-1.08296	-1.3755
560	-2.38081	-1.54866	1.8153	0.145134	-0.491851	-2.20787	-1.67221	-0.85585	-0.962368	560	-4.59099	2.41507	4.83742	-1.33487	3.52958	2.76768	1.43899	2.10932	3.36914	560	-0.245591	-1.59393	-1.27997	0.275646	-0.953784	-1.30491
561	-2.14068	-1.85983	1.67581	0.600089	-0.104249	-2.13816	-1.86349	-0.0331432	0.159949	561	-4.76174	2.76671	4.50657	-1.50808	3.25772	2.42249	1.36967	2.20839	3.69374	561	1.20751	-1.92167	-0.495348	0.873007	-1.48601	-1.91098
562	-2.07647	-1.36303	1.59047	0.233176	-0.236868	-2.07659	-1.43588	-0.728422	-0.479449	562	-5.00722	2.39567	4.59889	-1.39791	2.9973	3.45961	1.56632	2.11848	3.64739	562	0.465414	-1.82292	-0.883775	0.111112	-1.30653	-1.69603
563	-2.45787	-2.03575	0.940009	0.521155	-0.883416	-2.30225	-1.74383	-0.730771	-0.347584	563	-5.21002	2.1208	4.5878	-1.36875	2.89739	2.0631	1.42764	2.06263	3.55079	563	0.464092	-2.44979	-1.17315	0.247977	-1.43757	-1.78824
564	-2.02677	-1.6901	0.597392	0.438318	-0.668522	-2.29138	-1.7898	0.049656	-0.382162	564	-5.64952	2.45199	4.88084	-1.11975	2.28906	1.76006	1.48016	2.1958	3.54354	564	0.387369	-1.8172	-0.567207	0.651158	-1.49781	-1.91225
565	-2.46792	-1.61494	0.848138	0.439619	-0.463183	-1.78711	-1.43703	0.188829	-0.403261	565	-5.59292	2.44984	4.49976	-1.27204	2.02399	2.12208	1.54994	2.1724	3.56412	565	0.388692	-2.24656	-0.56656	0.601749	-0.876776	-1.33735
566	-2.43665	-1.94386	1.62714	0.39343	-0.852417	-2.1162	-2.0095	-0.0859938	-0.470658	566	-5.65574	2.04358	4.62673	-1.78163	2.931	2.13787	1.31794	1.9926	3.58102	566	0.566609	-2.31907	-0.525775	0.700074	-1.50526	-1.91798
567	-2.38974	-1.62052	1.43076	0.541106	-0.388833	-1.97361	-1.4107	-0.0554579	-0.261433	567	-5.59933	2.32407	5.35418	-1.557	2.50241	2.74582	1.39462	2.1448	3.489	567	0.506421	-1.4489	-0.525775	0.706991	-0.968068	-1.33544
568	-3.03863	-1.90959	1.37365	1.09473	-0.737045	-2.15015	-1.53776	-0.0149391	-0.572634	568	-5.5602	2.48391	4.50062	-1.52315	3.12228	2.21361	1.38889	1.99992	3.48	568	0.386046	-1.60442	-0.427373	0.90117	-1.61705	-1.92497
569	-2.35121	-1.31265	1.41601	0.822145	-0.959165	-1.82649	-1.59112	0.0508305	-0.516958	569	-5.9025	2.15457	4.28454	-1.83448	3.08201	2.27009	1.40824	2.14936	3.43674	569	0.32189	-2.09533	-0.51218	0.582973	-1.64624	-1.91098
570	-2.45396	-2.01345	1.35026	0.735622	-0.683671	-1.9718	-1.47815	0.0584645	-0.467142	570	-5.95726	2.07085	4.14453	-1.32352	2.6112	2.47709	1.2481	2.14528	3.43041	570	0.399936	-1.85011	-0.551023	0.674381	-1.56985	-1.92052
571	-2.38862	-2.1076	1.77211	0.594451	-0.548022	-2.12548	-1.19238	-0.602168	-0.546847	571	-5.85969	2.09756	4.29397	-1.66934	2.69681	1.81563	1.12869	1.96526	3.28553	571	0.376787	-1.95889	-1.24825	0.57655	-1.64996	-1.91352
572	-2.36517	-2.07622	1.46468	0.44439	-0.2385	-1.95505	-1.73274	-0.0859938	-0.430806	572	-5.56011	2.29613	4.03489	-1.81939	3.14136	2.28809	1.32423	2.11325	3.35514	572	0.544782	-2.11536	-0.473337	0.523682	-1.5419	-1.95168
573	-3.10899	-2.59469	1.08266	0.0143729	-0.324737	-2.43171	-1.62277	-0.84117	-0.314179	573	-5.61922	2.05513	4.06912	-1.48298	3.08217	2.45478	1.30259	2.08426	3.36433	573	0.472028	-2.19647	-1.11877	0.789999	-1.63568	-2.021
574	-3.11793	-2.3558	1.14566	0.535034	-0.586713	-2.22394	-1.8129	-0.0255092	-0.461867	574	-5.69203	2.47588	4.30482	-1.54908	2.95563	1.85827	1.26867	2.01937	3.41257	574	0.40192	-2.05907	-0.29725	0.289481	-1.67108	-2.17745
575	-2.98893	-2.12454	1.23838	-0.023793	-0.659898	-2.22348	-1.90207	-0.0619174	-0.440769	575	-5.2095	1.8041	4.19254	-2.24987	2.35725	1.91615	1.25115	2.1548	3.28131	575	0.360913	-2.43595	-0.510238	0.198567	-1.55619	-1.9008
576	-2.40482	-1.85239	1.35953	0.543057	-0.944481	-1.99081	-1.56155	-0.701997	-0.424945	576	-5.83881	1.93869	4.59533	-1.89029	3.18709	1.97412	1.0985	2.01034	3.32248	576	0.516342	-2.28902	-1.01196	0.718355	-1.56612	-1.92561
577	-2.45899	-1.85694	1.67497	0.553683	-0.562706	-2.20289	-1.4405	-0.740166	-0.235646	577	-5.78941	2.21917	4.03768	-1.47241	2.74238	2.08761	1.23603	2.02341	3.37443	577	0.474013	-2.04905	-0.850111	0.714897	-1.00906	-1.32653
578	-2.37466	-1.8016	1.53211	0.410127	-0.43638	-2.06799	-1.55993	-0.198742	-0.294252	578	-5.72005	2.02024	4.24949	-1.74057	2.66077	2.06592	1.12753	2.0402	3.31219	578	0.325859	-2.2623	-0.35422	0.660052	-1.70958	-2.04835
579	-2.53102	-2.01572	1.17411	0.556285	-0.807434	-1.91771	-1.52805	-0.776575	-0.279015	579	-6.14999	2.41901	4.06852	-1.82538	2.68082	2.20826	1.12532	1.97255	3.17443	579	0.405888	-2.227	-0.994477	0.561727	-1.68909	-2.10813
580	-2.33781	-1.52615	1.02766	0.218647	-0.727256	-1.72758	-1.84409	-0.504688	-0.198137	580	-5.94925	1.90266	3.87961	-1.7506	2.53582	1.75192	1.2221	1.89052	3.19623	580	0.39729	-2.3143	-0.89996	-0.0124117	-1.60773	-1.94405
581	-3.0833	-1.69567	0.894074	0.325772	-0.489754	-1.83396	-2.0587	0.10603	-0.291322	581	-5.73158	2.06764	4.35786	-1.80022	2.84379	1.45417	1.08126	2.02474	3.15057	581	0.452186	-2.3706	-0.667551	0.337408	-1.56053	-1.97966
582	-2.39979	-1.36056	1.74198	0.448076	-0.769443	-1.62279	-1.67452	0.0296903	-0.408535	582	-6.07374	1.98549	3.98735	-1.97892	3.36641	2.02782	1.15974	1.9609	3.05915	582	0.39266	-2.22938	-0.500527	-0.208567	-1.62326	-1.91225
583	-2.43944	-1.94283	1.24112	0.257247	-1.15984	-2.2511	-2.18784	-0.582202	-0.304215	583	-6.17649	1.84121	4.31409	-1.90721	2.59391	1.85594	1.04788	1.99402	3.1238	583	0.360913	-1.90784	-1.14402	0.215366	-1.66673	-2.00828
584	-2.33892	-1.64488	1.09425	-0.1101	-0.730752	-2.21149	-2.3089	0.0942854	-0.326486	584	-5.84521	2.08882	4.23617	-1.67034	2.4741	2.5384	0.994076	1.92079	3.05406	584	0.305355	-1.98417	-0.28754	0.514294	-1.78659	-2.17808
585	-2.36126	-1.51542	1.06475	0.583392	-0.474138	-2.38735	-1.89145	-0.516432	-0.351101	585	-6.21683	1.96847	4.65294	-2.56454	2.72935	1.46785	0.995511	1.82129	3.01531	585	0.347685	-1.85775	-1.17315	0.928346	-1.76858	-2.04962
586	-1.95138	-1.51253	1.03715	0.328374	-0.76618	-2.24023	-2.22111	-0.590423	-0.420843	586	-6.20314	2.0421	4.02545	-1.75515	2.62612	2.45819	1.15227	1.85676	2.90545	586	0.220035	-2.32194	-0.8158	0.341855	-1.0929	-1.52559
587	-3.14641	-1.29015	1.76663	0.175711	-0.758255	-1.85886	-1.909	-0.710805	-0.378646	587	-6.16854	1.6875	4.26551	-2.26166	2.95596	1.8182	1.00028	1.81984	2.99925	587	0.292127	-2.20267	-0.863706	0.43425	-1.64748	-1.95041
588	-2.56285	-1.48961	1.55824	0.437017	-0.746368	-2.3577	-2.09682	0.00385222	-0.489412	588	-6.40328	2.20271	4.11106	-1.95529	2.44897	1.5685	0.963349	1.92721	2.88033	588	0.147281	-2.26612	-0.558144	0.350254	-1.49346	-1.82513
589	-2.53437	-1.72623	1.86714	0.476701	-0.58042	-2.08089	-2.19524	0.0361498	-0.304215	589	-6.20167	1.56028	3.88902	-2.23278	2.41231	2.08784	0.979499	1.85796	2.73837	589	0.290143	-2.13206	-0.426079	0.748989	-1.56799	-1.85056
590	-2.34507	-2.16583	1.14777	0.55043	-0.974548	-1.99375	-1.7034	-0.480024	-1.54843	590	-5.88794	1.71787	4.14094	-1.93609	2.61854	2.32622	0.933101	1.61352	2.86751	590	0.0143392	-2.00182	-0.990593	0.964415	-1.61456	-1.80986
591	-1.79279	-1.27342	1.44129	0.201733	-0.920241	-2.30655	-2.32715	0.0361498	-0.903762	591	-6.14241	1.81153	4.0461	-2.0903	2.67812	1.3735	0.860758	1.80147	2.64547	591	-0.626558	-2.29617	-0.543901	0.167933	-1.02769	-1.29537
592	-3.2391	-1.56993	1.45077	0.137111	-0.412606	-2.71689	-1.91871	-0.386655	-1.60939	592	-6.27274	2.03032	3.81	-1.94811	2.15378	2.06582	1.01424	1.58898	2.6773	592	0.06196	-2.1478	-1.223	0.564198	-1.63133	-1.97903
593	-2.55559	-2.10678	2.07932	0.704829	-0.848222	-2.33167	-2.07303	-0.3156	-1.44236	593	-6.69593	1.49542	4.14361	-2.30275	2.47745	1.61713	0.845917	1.63454	2.74423	593	0.116856	-2.06527	-1.22494	0.413004	-1.71517	-1.97267
594	-1.88939	-1.69423	1.54033	0.0612129	-0.572495	-2.75333	-2.20841	-0.313251	-1.60528	594	-6.31283	1.88059	4.4228	-2.23503	2.4139	1.54473	1.049	1.59145	2.76127	594	-0.0279905	-2.27804	-1.15179	0.562715	-1.12519	-1.36533
595	-2.65611	-1.96018	1.1267	0.589897	-0.70255	-2.84228	-2.36665	-0.219882	-1.47225	595	-6.04113	1.77169	3.86358	-2.14556	2.49672	1.2356	0.93981	1.57382	2.61122	595	-0.0438641	-2.46601	-1.16992	0.880418	-1.65369	-1.90462
596	-2.40817	-1.96782	1.80751	0.328374	-0.823749	-2.28618	-1.82468	-0.535224	-1.57305	596	-6.18573	1.40678	4.03702	-2.34808	1.42561	1.59615	0.811049	1.54721	2.59326	596	-0.0663517	-2.6826	-1.18286	0.830021	-1.54066	-1.74881
597	-3.31952	-1.08284	1.44298	0.579488	-0.882717	-2.21217	-2.42579	0.162404	-1.5584	597	-6.49006	1.40171	4.19076	-1.8676	2.56885	1.81362	0.922288	1.63864	2.37297	597	0.114211	-2.08865	-0.55167	0.453026	-1.67232	-1.79969
598	-1.84751	-1.7857	1.67581	0.1048	-0.662462	-2.51297	-2.31306	-0.32617	-1.52089	598	-6.4876	1.55704	4.17005	-2.58906	2.43578	2.21179	1.07111	1.61259	2.57739	598	0.145958	-2.07243	-1.25149	0.916487	-1.0016	-1.29919
599	-2.44447	-1.97215	1.65748	0.7495	-0.662928	-2.03766	-2.42972	-0.494118	-1.74242	599	-6.17364	1.41569	4.00196	-2.19723	2.40249	1.76016	0.920009	1.50339	2.39031	599	0.120825	-1.98417	-1.08511	0.585444	-1.75119	-2.03944
600	-2.54554	-1.82617	0.680623	0.436366	-1.14912	-2.84568	-1.91755	-0.223405	-1.7981	600	-6.55077	1.65023	3.87234	-1.93959	2.7297	1.9511	0.827514	1.59726	2.49952	600	0.141989	-2.37298	-1.10971	0.549869	-1.7456	-1.91734
601	-1.8302	-1.79148	0.604345	0.044949	-1.03468	-2.03834	-1.71287	-0.126513	-1.35152	601	-6.76886	1.31427	3.84926	-2.29259	2.66688	1.63276	1.051	1.63471	2.44519	601	0.0659284	-2.21793	-1.10324	0.557774	-1.10842	-1.46454
602	-2.16414	-2.03451	1.39999	0.468243	-0.272995	-2.06279	-2.50596	-0.337915	-1.5455	602	-6.48302	1.66311	4.02888	-1.93401	2.31006	0.664052	0.884826	1.45613	2.41631	602	-0.0246835	-2.46124	-1.1492	0.50293	-1.44813	-1.77425
603	-1.72968	-1.6488	0.867313	0.314496	-0.636124	-2.82304	-2.08458	-0.390765	-1.80337	603	-6.78801	0.902296	4.30482	-2.87138	2.27138	1.89173	1.0944	1.51671	2.35801	603	0.0407952	-2.70407	-1.2858	-0.203627	-1.09476	-1.39585
604	-2.51483	-2.3558	0.989947	0.416633	-0.805802	-2.7273	-2.81437	0.0155968	-1.36265	604	-6.61737	0.836461	4.08133	-1.92218	2.5734	1.51834	1.00727	1.62115	2.39409	604	0.0447636	-2.68594	-0.4701	0.0226691	-1.65369	-2.05661
605	-1.88604	-3.24511	1.26261	0.1048	-0.878288	-3.16662	-2.55216	0.0690346	-1.51444	605	-6.75149	1.34533	3.86939	-1.60658	2.12264	1.02082	0.928053	1.64246	2.35961	605	0.0533618	-2.62583	-0.467511	0.640288	-1.10718	-1.31191
606	-1.95529	-1.90732	1.27146	0.529612	-1.04004	-2.64831	-2.78041	-0.478262	-1.50741	606	-6.60529	1.30709	3.96088	-1.78903	2.09206	2.36296	1.14595	1.559	2.45863	606	0.071881	-2.175	-1.29227	-0.226849	-1.01092	-1.30618
607	-2.40929	-3.10016	1.30075	-0.142411	-0.802306	-2.73568	-3.04262	-0.590423	-1.617	607	-6.07949	1.22913	3.68969	-2.52665	2.30707	1.29432	0.877198	1.52053	2.15306	607	0.116195	-2.30142	-1.25602	0.231177	-1.73256	-2.05661
608	-2.2708	-3.07022	0.5464	0.160965	-0.872694	-2.7909	-2.63625	0.103681	-1.4365	608	-6.59349	0.977162	3.77037	-2.09726	2.47676	1.40323	0.810306	1.80097	2.30617	608	0.228633	-2.2165	-0.60605	-0.170028	-1.74188	-2.19271
609	-1.69283	-3.06176	1.6657	0.323603	-0.714204	-2.6972	-1.95082	-0.486484	-1.4488	609	-6.8594	1.27839	4.1745	-2.12268	2.48145	1.59528	1.04444	1.68766	2.20303	609	0.162493	-2.2666	-1.19905	0.574574	-1.14196	-1.41748
610	-2.03682	-1.76505	1.3214	0.435933	-0.873627	-2.06573	-2.80628	-0.252767	-1.49334	610	-7.22141	1.07772	4.02054	-2.24945	2.07343	1.8574	0.963513	1.80598	2.22937	610	0.161831	-2.09724	-0.48499	-0.0736795	-1.84807	-2.24931
611	-2.23227	-2.73613	1.48343	0.477351	-0.727256	-2.55506	-2.32923	-0.436569	-1.20383	611	-7.05949	0.935671	4.31898	-2.54546	2.32429	1.11991	0.996568	1.6767	2.19465	611	0.101644	-2.68642	-1.17963	-0.0133999	-1.81143	-2.15455
612	-3.14529	-3.1621	0.985312	0.280016	-0.791818	-3.09578	-2.90077	-0.404859	-1.2806	612	-6.84268	1.20787	4.34942	-2.22127	2.96181	1.12201	1.08525	1.54809	2.09071	612	0.0632828	-2.60961	-1.21394	0.162004	-1.76051	-2.12466
613	-2.1619	-2.57694	0.632791	0.915392	-0.736346	-2.6637	-2.82684	-0.503513	-1.34566	613	-6.7577	0.799288	3.97014	-2.55312	2.84486	1.6336	1.00413	1.62971	2.13681	613	0.122147	-2.03045	-1.346	0.604713	-1.58848	-2.01782
614	-2.32887	-2.89657	0.820957	0.934475	-0.757789	-2.63338	-2.58912	-0.858199	-1.34448	614	-7.17165	0.858105	3.62464	-2.67304	2.48528	1.14033	1.07745	1.71429	2.14174	614	0.166461	-2.36583	-1.39067	0.122476	-1.62636	-2.14756
615	-2.15185	-2.83834	0.125609	0.724996	-0.701152	-2.51251	-2.67992	-0.568108	-1.19738	615	-6.89183	0.910724	3.90501	-2.44443	2.52393	0.825234	1.09224	1.58075	2.05184	615	0.0163234	-2.25753	-1.30587	-0.0306932	-1.68226	-2.24104
616	-2.25628	-2.88748	0.728665	0.817158	-0.656635	-2.82485	-2.92942	-0.480024	-1.93289	616	-7.02871	0.826212	3.77827	-2.68502	1.87591	0.89514	1.07627	1.73704	1.89583	616	-0.454594	-2.8386	-1.10129	0.418439	-1.61146	-2.05407
617	-2.35735	-2.32689	0.488243	1.10427	-0.387201	-2.6087	-2.3417	-0.222231	-1.27591	617	-7.05122	0.73613	4.12242	-2.6064	2.36622	0.278495	1.01043	1.81599	2.07889	617	0.197547	-2.34722	-0.421547	-0.614714	-1.64686	-2.08205
618	-2.52711	-2.29736	1.13365	0.724779	-0.0860696	-3.05798	-3.10499	-0.390765	-1.1165	618	-7.57172	1.49399	3.76974	-2.64695	2.43552	1.50397	1.11685	1.68814	1.90887	618	0.171091	-2.35867	-1.02749	0.267246	-1.64624	-2.01909
619	-2.25125	-2.00292	0.755425	0.522456	-0.644282	-2.91539	-2.93196	-0.508798	-1.02215	619	-7.10278	0.777475	3.90519	-2.62871	2.367	1.18164	1.06265	1.65138	1.98929	619	0.078495	-2.60865	-1.04886	0.196097	-1.60835	-1.94914
620	-2.38974	-2.08696	1.36691	0.796123	-0.210298	-2.76918	-3.16436	-0.590423	-0.934823	620	-7.091	1.27607	4.08511	-2.74593	2.7062	0.876334	1.04768	1.63139	2.12032	620	0.169768	-2.60865	-1.07993	0.653135	-1.77044	-2.13738
621	-2.29816	-2.08469	0.517532	1.18949	-0.479498	-2.73704	-2.97493	-0.573393	-1.01687	621	-7.27726	0.678482	3.85318	-2.40584	2.08598	0.836323	0.786439	1.60125	2.04368	621	0.195563	-2.20792	-1.07346	0.590879	-1.76672	-2.1342
622	-2.42827	-2.00911	1.10247	0.608546	-0.586246	-2.53628	-2.65473	-0.92808	-1.06024	622	-7.52522	0.756206	3.91752	-2.76465	2.8054	1.19811	1.02074	1.63373	2.10288	622	0.23194	-2.08483	-1.0754	0.333949	-1.60897	-1.90971
623	-2.10885	-2.0279	1.11153	0.622859	-0.479732	-2.92738	-2.67737	-0.393114	-1.45115	623	-7.2159	0.757725	3.98771	-1.88237	2.34864	0.266822	0.906452	1.67506	1.84518	623	-0.556449	-2.43691	-1.13884	0.796916	-1.62202	-2.07824
624	-2.87501	-2.01655	0.856356	0.646062	-0.720963	-2.57634	-3.03846	-0.115942	-0.938339	624	-7.24576	1.1812	4.05215	-3.24029	2.33206	1.58416	0.85965	1.78144	2.0231	624	0.220696	-2.29856	-0.461684	0.548881	-1.77665	-2.10431
625	-2.08987	-2.16872	0.837181	0.70678	-0.515858	-2.67638	-2.73929	-0.704345	-1.55957	625	-7.56247	1.35487	3.86545	-3.19394	1.42012	1.25593	0.992125	1.5217	1.84053	625	-0.448641	-2.3372	-1.0495	1.05928	-1.722	-2.02482
626	-2.10885	-1.7731	0.984047	0.939679	-0.38254	-2.50052	-2.57711	-0.809459	-0.901417	626	-7.31121	1.24616	3.88149	-2.60242	2.28461	0.645052	0.916636	1.61076	2.02142	626	0.251121	-2.4746	-1.2612	0.404605	-1.81516	-2.21115
627	-2.12728	-1.6168	1.35848	0.866166	-0.463416	-2.88732	-2.9248	-0.84528	-0.962368	627	-7.87976	1.07841	3.70852	-2.75711	1.99965	0.907916	0.893688	1.63777	1.86934	627	0.218051	-2.19885	-1.09935	0.587914	-1.75926	-2.15328
628	-2.20658	-1.44893	0.949069	0.801544	-0.617711	-2.5614	-2.58866	-0.683205	-0.917241	628	-7.85965	1.20604	4.39006	-2.95206	2.65374	1.34059	0.817255	1.74544	1.97379	628	0.257073	-1.9274	-1.01131	0.545422	-1.90024	-2.19907
629	-2.1619	-1.00004	0.879745	0.807183	-0.583449	-2.51229	-1.62	-0.296222	-1.222	629	-7.33004	1.02802	3.65834	-2.64505	1.92915	0.790831	1.02264	1.78712	1.88305	629	0.108919	-2.1459	-0.513475	0.611631	-1.83503	-2.13039
630	-2.39198	-1.51438	0.692423	1.40352	-0.859409	-2.78683	-2.26755	-0.533462	-1.09541	630	-7.33879	1.27561	3.82175	-2.10473	1.81607	0.629326	0.934259	1.70809	1.85208	630	0.113549	-2.26087	-1.00289	0.298374	-1.84497	-2.16918
631	-2.22277	-0.935823	1.44487	0.649965	-0.937722	-2.75786	-2.33986	-0.198742	-0.866253	631	-7.5774	1.37686	3.6513	-2.72907	1.80863	0.902857	0.904564	1.83224	1.88257	631	0.184319	-2.5266	-0.501174	0.337408	-1.86608	-2.20543
632	-2.13957	-2.46482	1.26493	1.1947	-0.213794	-2.85631	-2.44312	-0.593946	-0.986983	632	-7.37959	1.00629	4.23578	-2.57428	2.39954	0.854675	0.902902	1.69811	1.91894	632	0.146619	-2.25515	-1.14078	0.221789	-1.74001	-2.00383
633	-1.943	-2.26825	0.714969	0.90238	-0.992727	-2.59558	-2.89546	-0.633291	-0.82054	633	-7.39324	0.592993	4.18952	-2.97626	2.12908	0.799813	1.02455	1.70249	1.98676	633	0.286175	-2.01375	-1.20099	0.678334	-1.82509	-2.26902
634	-1.74197	-2.13713	1.10795	1.02902	-0.878987	-2.7187	-2.41517	-0.846455	-0.738491	634	-7.40744	0.790341	4.16461	-2.78035	2.24407	0.92215	1.03758	1.76793	2.07782	634	0.291466	-1.61969	-1.04756	0.716873	-1.22207	-1.55993
635	-2.03682	-2.10162	1.48533	0.969821	-0.369488	-3.10098	-2.92549	-0.469454	-1.39782	635	-7.72423	0.573098	3.39592	-3.68647	2.62881	0.567687	0.981652	1.80937	1.76349	635	-0.238977	-1.84916	-1.09741	0.255388	-1.82758	-2.24295
636	-2.06921	-1.95667	1.404	0.658639	-0.883416	-2.22688	-2.22504	-0.638576	-1.42009	636	-8.12722	0.925157	3.62642	-2.94918	2.13818	0.968776	0.97498	1.77869	1.85881	636	-0.17416	-2.19503	-1.08187	0.228707	-1.90397	-2.38477
637	-2.32552	-1.6932	1.28642	0.808917	-0.123594	-3.30333	-2.58081	-0.665001	-0.890282	637	-8.34184	1.06138	3.84412	-3.01005	1.68814	0.115725	0.863779	1.80533	1.81875	637	0.337764	-2.25085	-1.14337	0.305292	-1.98718	-2.36442
638	-1.50296	-1.64922	1.22552	1.1394	-0.890641	-2.58924	-2.17098	-0.542858	-1.02449	638	-7.55397	0.818616	3.79158	-2.72689	2.03553	0.78198	0.921834	1.79839	2.02945	638	0.247814	-1.94982	-1.23724	0.474272	-1.24256	-1.67122
639	-2.18648	-1.8462	0.761325	1.1149	-0.848455	-3.19763	-2.52744	-0.103023	-0.968229	639	-7.86632	0.557218	3.96086	-2.11479	1.83577	0.577415	0.881981	1.98138	1.98929	639	0.136037	-2.07004	-1.04821	0.357172	-1.96545	-2.31291
640	-1.30528	-2.3368	0.526382	0.722394	-1.03888	-3.32256	-2.77741	-1.41783	-0.723253	640	-8.13829	0.886271	3.85942	-2.75118	2.43529	-0.195613	0.996292	1.85118	1.88178	640	0.0249216	-2.58862	-1.12007	0.804328	-1.35	-1.72337
641	-1.53424	-2.89223	1.52115	0.629581	-0.620042	-2.64424	-2.54916	-0.437744	-1.38785	641	-8.16305	0.347126	3.83683	-2.63691	1.80551	0.414774	0.953228	1.8552	1.73046	641	-0.408296	-1.7671	-1.63279	0.637818	-1.36926	-1.731
642	-2.16581	-2.2286	0.563467	0.983049	-0.841929	-2.78004	-2.91255	-0.638576	-1.45877	642	-8.34751	0.906323	3.98311	-3.00944	1.72653	0.0487688	0.843966	1.84536	1.81612	642	-0.5333	-2.43262	-1.64833	0.42338	-1.90459	-2.1978
643	-2.24232	-2.08737	0.621413	0.157061	-0.748233	-3.2687	-2.75292	0.0760813	-1.41774	643	-8.53026	0.700801	3.91477	-3.15612	2.23111	0.805714	0.844255	1.99758	1.75455	643	-0.559095	-2.39874	-0.358751	0.8903	-1.96731	-2.48144
644	-1.76207	-2.46482	0.963398	0.909537	-0.543128	-3.0616	-2.60876	-0.653257	-0.974676	644	-8.08192	0.336769	3.7048	-2.90539	1.73615	1.013	0.915855	1.9075	1.8515	644	-0.0147625	-2.44407	-1.1369	0.645723	-1.36367	-1.70429
645	-1.77938	-2.00436	0.624574	0.676204	-1.12651	-3.25874	-3.01974	-0.403684	-0.926032	645	-8.15456	0.544365	4.01277	-2.48261	1.76017	0.381248	1.08958	1.79228	1.73649	645	0.153233	-2.76418	-1.22365	0.371994	-1.29908	-1.66359
646	-2.20993	-2.05041	0.923784	0.678373	-1.01627	-2.73364	-2.47939	-0.469454	-1.00105	646	-8.45497	0.449025	3.66751	-3.11525	1.94625	-0.0538866	0.800714	1.89573	1.78949	646	0.0116936	-2.56572	-1.12784	-0.101349	-1.85304	-2.26839
647	-2.45675	-2.6651	0.256461	0.555852	-0.827944	-2.9138	-2.46507	-0.390765	-0.88618	647	-8.5094	0.0131298	3.80712	-2.92969	2.0474	0.407706	0.765896	1.87168	1.72975	647	0.0672512	-2.63537	-1.0631	-0.223884	-1.97042	-2.28874
648	-2.24511	-3.13361	0.759429	0.579272	-0.62517	-3.21845	-2.3953	-0.41954	-1.5455	648	-8.44417	0.359558	4.48189	-2.80917	1.61374	0.24941	0.764574	1.94139	1.45445	648	-0.713863	-2.30094	-1.66516	-0.445239	-1.77727	-2.21878
649	-2.40705	-3.07683	0.937691	0.549997	-0.95124	-3.47376	-2.42279	0.150659	-1.53964	649	-8.1603	0.265412	3.77569	-2.77481	1.72974	0.334103	0.840643	1.96232	1.61746	649	-0.591504	-2.26087	-1.04562	0.184732	-1.90956	-2.29256
650	-2.54722	-2.71487	1.00786	0.213443	-0.30446	-3.55682	-2.30636	-0.411318	-1.46639	650	-8.11996	0.562271	3.85974	-3.02857	1.80138	0.618204	0.846635	1.88217	1.42918	650	-0.740319	-1.92311	-1.66905	0.757883	-2.02383	-2.35424
651	-3.32231	-2.89925	0.492879	0.544792	-0.531241	-3.41672	-2.15989	-0.285651	-0.836364	651	-8.46117	-0.0961847	3.684	-3.2042	1.93728	0.431278	0.853281	1.89589	1.6688	651	0.130084	-2.82572	-1.79593	0.755906	-1.96545	-2.35806
652	-2.35903	-2.48257	0.776497	-0.0329007	-1.38126	-2.86039	-2.24953	-0.0319687	-2.12571	652	-8.62929	-0.0798828	3.88233	-2.77891	1.2604	0.252166	0.85644	1.88014	1.62419	652	0.0745266	-1.98656	-0.521891	0.36903	-1.91328	-2.24677
653	-3.20672	-2.86704	0.457901	1.15241	-0.724925	-3.44795	-2.63325	-0.585138	-2.59574	653	-8.48045	-0.0205833	4.18702	-3.09342	1.78243	0.293961	0.939747	1.83931	1.47921	653	-0.555788	-2.24131	-1.79464	0.564198	-1.84373	-2.33771
654	-2.49249	-2.40514	0.321992	0.702877	-1.3808	-2.9602	-2.44451	-0.424825	-2.03956	654	-8.47949	0.587543	3.64632	-2.72035	1.95164	0.643722	0.780913	1.84116	1.52862	654	0.0103708	-2.46506	-1.64056	0.657087	-1.76361	-2.06107
655	-3.21286	-2.36096	-0.794357	1.06697	-0.985269	-3.23475	-3.03984	-0.657367	-1.08661	655	-8.30168	0.104949	3.45346	-3.05874	2.504	-0.202714	0.778018	1.89717	1.66423	655	0.032197	-2.87581	-1.79917	-0.0213054	-1.958	-2.31291
656	-2.2116	-2.42538	0.816532	0.536335	-1.10111	-3.27865	-2.01088	-0.748975	-0.744351	656	-8.67797	0.247494	4.22838	-3.10515	1.75188	-0.000354073	0.816386	1.70135	1.59829	656	-0.0676745	-2.72315	-1.67099	0.925875	-1.88968	-2.26648
657	-1.92178	-3.3723	0.166487	0.643026	-1.30435	-3.47941	-2.32299	-0.0448878	-1.96982	657	-8.77597	0.238511	3.7386	-2.90639	1.94644	0.17571	0.789423	1.91704	1.56927	657	0.116856	-2.59339	-1.18545	1.18528	-1.95737	-2.24995
658	-2.97776	-3.0665	0.722765	0.654736	-0.704648	-2.96224	-2.60507	-0.720201	-1.7811	658	-8.66762	-0.23404	3.99859	-2.77558	2.42352	0.401124	0.667963	1.64424	1.60854	658	0.138682	-2.88679	-1.78622	0.911546	-1.93874	-2.2722
659	-2.42213	-2.93415	-0.322152	0.950522	-1.33022	-3.08582	-2.51266	-0.406033	-2.5635	659	-8.50871	-0.112402	3.87758	-3.02569	1.45122	0.3972	0.763744	1.46158	1.41546	659	-0.630526	-2.48891	-1.76939	-0.280211	-1.78162	-2.24867
660	-1.99326	-2.4611	-0.290756	0.632183	-1.347	-3.15779	-2.09012	0.0179457	-2.00264	660	-8.15663	-0.108544	3.72454	-2.86388	1.51987	0.153013	0.827337	1.77144	1.56504	660	-0.0207151	-2.36058	-1.11424	0.299362	-1.80646	-2.0776
661	-1.88213	-3.09128	0.309139	0.69919	-1.27591	-2.87193	-2.7781	-0.625657	-1.86784	661	-8.90535	-0.138169	3.82046	-2.86276	1.75029	0.0293142	0.769635	1.58482	1.50268	661	-0.0398957	-2.85959	-1.85161	0.550363	-1.781	-2.07379
662	-2.95822	-2.4004	-0.0214673	0.704829	-1.11416	-3.31102	-2.68523	-0.628593	-2.21421	662	-8.72841	0.313763	3.7765	-2.96569	1.91131	-0.562948	0.637777	1.46102	1.56899	662	-0.0584149	-2.48986	-1.78104	0.13137	-1.92757	-2.22006
663	-2.32552	-2.24615	-0.187086	0.675554	-1.12768	-3.20713	-3.16275	0.255773	-2.13333	663	-8.9827	0.313787	3.62045	-2.87222	1.91937	-0.603543	0.688166	1.59867	1.45767	663	-0.0518009	-2.63966	-1.12719	0.0552794	-1.80522	-2.02354
664	-2.06306	-2.13858	-0.444576	0.442004	-1.27335	-2.69177	-2.43434	0.0707963	-2.07941	664	-8.94859	0.356567	3.89038	-3.10262	2.10243	-0.670078	0.638696	1.78083	1.57603	664	-0.176144	-2.71122	-1.06634	0.0365038	-1.96545	-2.34725
665	-1.95864	-3.46295	-0.506103	0.213226	-1.10134	-3.19333	-2.48101	-0.38137	-1.8233	665	-9.09302	-0.269561	3.54343	-3.12887	1.43838	0.226195	0.588193	1.65585	1.42136	665	-0.246253	-3.36433	-1.78104	0.387311	-1.97601	-2.19017
666	-1.6677	-3.38325	-0.947754	0.668831	-1.01091	-2.9593	-2.84094	-0.435395	-2.11926	666	-8.5574	-0.163707	3.74976	-2.84747	1.44719	0.143707	0.700464	1.69186	1.48402	666	-0.207891	-2.06432	-1.70077	0.661534	-1.33634	-1.51669
667	-2.44167	-2.62814	-0.0503347	0.729983	-1.21345	-3.00751	-2.78734	0.0244052	-1.82213	667	-8.97307	0.0276954	3.61995	-3.19057	1.39275	0.0223105	0.767306	1.58972	1.43132	667	0.0202918	-3.02418	-1.15567	0.548386	-1.27858	-1.48998
668	-2.07758	-2.78156	-0.939537	0.410344	-1.23676	-2.99393	-2.55863	-0.408969	-2.27399	668	-9.17496	-0.274867	3.86761	-3.51361	1.36252	-0.336756	0.547233	1.44019	1.24596	668	-0.678809	-2.96216	-1.83542	0.973308	-1.80895	-2.07315
669	-1.90168	-2.86828	-0.906455	0.89761	-0.829109	-2.66823	-2.77741	0.205859	-2.22417	669	-9.3601	0.215409	4.04521	-2.85183	1.31208	-0.129176	0.794584	1.63596	1.25858	669	-0.67484	-2.68928	-1.15503	0.857196	-1.91018	-2.30973
670	-2.08373	-3.15075	-0.582381	0.656254	-1.45282	-3.19966	-2.36365	-0.774226	-1.5332	670	-9.48216	0.0526909	3.54734	-2.84843	1.17209	-0.357508	0.740494	1.63665	1.38063	670	-0.0359273	-2.44597	-1.94742	0.352725	-1.90707	-2.2156
671	-2.34618	-2.43839	-0.346806	0.713503	-1.55397	-3.14557	-2.31236	-0.41954	-1.78872	671	-9.23447	0.425851	3.50139	-2.93979	1.14989	-0.34269	0.694334	1.60629	1.38815	671	-0.119925	-2.19647	-1.98173	1.07954	-1.27548	-1.57837
672	-3.01238	-2.27011	0.769543	0.668398	-1.43091	-3.10121	-2.86773	-0.324996	-1.95048	672	-9.38697	0.00657045	3.15652	-3.12153	1.86271	0.130737	0.592524	1.68878	1.29483	672	-0.200616	-2.56858	-1.4334	0.657582	-2.07786	-2.4083
673	-2.86999	-4.36816	0.0208857	0.637821	-1.28477	-3.08718	-2.66744	-0.455948	-1.79107	673	-9.43153	-0.0547547	3.48165	-3.11518	1.21626	-0.293567	0.645405	1.74108	1.19855	673	-0.0775955	-2.89537	-1.35248	0.865596	-1.95613	-2.23087
674	-2.0787	-3.56846	-0.842188	0.983483	-1.2279	-2.70716	-2.43873	-0.717852	-1.80103	674	-9.04686	0.365538	3.33627	-3.18506	1.39633	0.0428351	0.752616	1.57498	1.27775	674	-0.0630447	-2.86532	-2.0756	1.37945	-1.98967	-2.20161
675	-2.10885	-3.57569	-0.855884	0.805882	-0.999254	-2.80267	-2.63002	-0.976232	-2.2986	675	-9.44547	0.470633	3.46261	-3.27003	1.48171	-0.677763	0.709603	1.59867	1.21532	675	-0.690714	-2.2227	-1.41204	1.53905	-2.00271	-2.20606
676	-2.91243	-3.29363	-0.259571	0.556936	-1.3125	-3.00524	-2.64642	0.0220563	-1.89773	676	-8.83078	0.23323	3.76905	-3.58586	1.58452	0.274961	0.635952	1.60329	1.35806	676	0.042118	-2.54807	-1.33306	1.45011	-2.04742	-2.30082
677	-1.66435	-3.12514	-1.2084	0.876358	-1.09761	-2.69041	-2.3782	-0.791255	-1.90535	677	-9.11056	-0.371557	3.34936	-3.25766	1.91732	-0.0120268	0.678549	1.53615	1.39172	677	0.0143392	-2.31526	-2.0497	1.17589	-1.3146	-1.55484
678	-1.55378	-2.76463	-1.04236	0.883081	-1.29805	-3.11524	-3.05047	-0.478262	-1.72132	678	-9.30836	0.451823	3.57649	-2.97585	1.68167	-0.00434226	0.795578	1.55691	1.29718	678	0.0441022	-2.63632	-1.82506	1.35327	-1.28107	-1.46899
679	-1.72857	-2.61637	-1.0805	0.606378	-1.78961	-3.41785	-2.68038	-0.626831	-2.43164	679	-9.55301	0.183552	3.59546	-2.7783	1.37926	-0.349726	0.898094	1.43247	1.16477	679	-0.63714	-3.32569	-1.84125	1.29991	-1.45185	-1.56502
680	-2.81191	-2.70413	-1.21852	0.510313	-1.27987	-3.24403	-2.69678	-0.551079	-1.74008	680	-9.69673	0.161427	3.51001	-2.87802	1.49692	-0.198726	0.615396	1.6678	1.21231	680	0.0573302	-2.83431	-1.84319	0.861643	-2.04308	-2.25185
681	-1.74365	-2.4132	-1.45957	0.641942	-1.59266	-3.4355	-2.74229	-0.773051	-1.88073	681	-9.31026	-0.113873	3.50638	-3.03867	1.68863	0.0162796	0.62208	1.55918	1.14915	681	0.042118	-2.34054	-1.83283	0.830021	-1.95116	-2.17363
682	-2.17196	-2.5534	-1.03309	0.414681	-1.60175	-2.67163	-2.66467	-0.444203	-1.32925	682	-9.20805	-0.235824	3.34527	-2.86299	1.4223	-0.731879	0.722229	1.62438	1.32354	682	0.155217	-2.50513	-1.71112	0.682286	-2.00892	-2.17872
683	-2.12226	-2.05185	-0.652969	0.743862	-1.285	-2.9731	-3.04285	-0.650908	-2.10461	683	-9.17062	-0.575415	3.18127	-2.69705	1.5905	-0.186405	0.708433	1.47441	1.16983	683	-0.625235	-3.14393	-1.83607	0.605207	-2.13375	-2.29637
684	-2.03793	-3.29301	-1.24486	0.379551	-1.41366	-3.48213	-2.54754	-0.812396	-1.80689	684	-9.09702	-0.435414	2.89949	-3.1465	1.85144	-0.233355	0.720895	1.64262	1.36169	684	0.0612986	-2.36487	-1.2366	0.362113	-1.99961	-2.12021
685	-1.96981	-3.29033	-1.1631	0.567128	-1.42648	-3.4819	-2.82014	-1.4466	-1.67151	685	-9.45518	-0.0500281	3.3019	-2.91341	1.80613	-0.225022	0.847465	1.51377	1.38017	685	0.153233	-2.75416	-1.84254	-0.071209	-1.94495	-2.159
686	-2.18145	-2.72767	-0.324259	0.951823	-1.4978	-2.68068	-2.66005	0.0244052	-1.59298	686	-9.54754	-0.353422	3.20245	-2.88453	1.66779	0.225579	0.97284	1.6988	1.34481	686	0.0500548	-2.00134	-1.29745	0.0488561	-1.46986	-1.67059
687	-2.65443	-2.76194	-0.624523	0.692251	-1.33535	-2.6293	-2.39299	-1.43779	-1.74477	687	-9.10162	-0.115393	3.67348	-3.19336	1.90497	-0.0386148	0.824681	1.5151	1.29606	687	-0.0895007	-2.68737	-1.82247	0.6477	-2.01203	-2.25503
688	-1.98712	-2.66841	-0.243136	0.701142	-1.57868	-3.26213	-2.53553	-0.454773	-1.61407	688	-9.0861	-0.174065	2.97948	-3.19362	1.74258	-0.88022	0.883051	1.50716	1.36299	688	0.00309535	-2.9302	-1.87426	0.577044	-2.09711	-2.29256
689	-2.58519	-2.76009	-0.886227	0.539588	-1.30714	-3.56497	-2.97793	-1.14594	-1.62521	689	-9.11754	-0.204896	3.34374	-2.78526	1.54997	0.178628	0.758205	1.63923	1.22263	689	-0.0365887	-2.81236	-1.75191	0.514788	-2.01078	-2.18508
690	-2.06753	-2.41919	-0.721029	0.392996	-1.4337	-3.60526	-2.71826	-1.34031	-1.42536	690	-9.55807	-0.521072	3.13555	-3.05169	1.88098	-0.177196	0.864371	1.53885	1.33833	690	0.00441816	-2.8844	-1.73249	0.914017	-2.09711	-2.42992
691	-1.89721	-2.32957	-0.176972	0.323387	-1.29899	-3.7698	-2.46807	-1.2904	-1.90769	691	-9.5937	-0.212625	2.80812	-3.05941	1.5068	-0.779607	0.917303	1.67571	1.24632	691	-0.522057	-2.32909	-1.77068	0.988625	-1.98035	-2.12975
692	-2.8242	-2.21704	-0.400116	0.912789	-1.36774	-3.00411	-2.54893	-0.389004	-1.42771	692	-9.34792	-0.17591	3.33146	-3.01043	1.97479	0.12088	0.853583	1.51531	1.2702	692	0.107597	-2.5495	-1.68523	1.17095	-1.98594	-2.26267
693	-1.90782	-3.78898	-0.614409	1.03097	-1.04773	-3.41151	-2.94651	-1.03848	-1.53613	693	-9.57639	-0.354664	2.73093	-2.97793	1.59703	-0.622123	0.908151	1.64004	1.33142	693	0.186303	-2.71981	-1.77651	0.484648	-1.9139	-2.159
694	-1.97372	-3.27567	-0.0893163	0.694203	-1.705	-3.25172	-2.39715	-1.10014	-1.63048	694	-9.75536	-0.0385372	3.3432	-3.04794	1.93009	-0.929667	0.856075	1.60258	1.37665	694	0.012355	-2.79376	-1.84707	0.530599	-2.07413	-2.3835
695	-2.48523	-2.78672	-0.805946	0.492097	-1.54208	-3.26168	-2.70718	-1.18411	-1.46639	695	-9.35252	0.0258988	3.26433	-3.3635	1.12057	-0.332379	0.922791	1.63891	1.19517	695	0.0361654	-2.11918	-1.74026	0.769741	-1.97663	-2.20034
696	-2.7019	-3.20815	-1.28974	0.299316	-1.39851	-3.57606	-2.95668	-1.19292	-1.33686	696	-9.73469	-0.601146	2.90737	-2.81164	1.69796	-0.741736	1.10054	1.54645	1.28159	696	0.000449752	-2.66733	-1.90534	0.585444	-1.9611	-2.18126
697	-2.57905	-2.77784	-0.511582	0.664277	-1.60128	-3.8411	-2.49163	-0.697886	-1.20734	697	-9.17381	-0.489674	2.92052	-3.19416	1.42184	-0.586942	0.909272	1.64267	1.21702	697	0.0427794	-2.68355	-1.29227	0.428321	-2.13189	-2.39431
698	-1.9564	-2.94385	-0.525067	0.738224	-1.34024	-2.94821	-2.30774	-0.85585	-1.91883	698	-9.55968	-0.32188	2.8378	-3.03704	1.40611	-0.794069	0.93631	1.61985	0.95137	698	-0.686745	-2.47126	-1.4075	0.891783	-2.18902	-2.46045
699	-2.02844	-2.7351	-0.489246	0.833855	-1.44979	-3.91669	-2.01412	-0.790081	-1.75004	699	-9.06704	-0.284513	2.60046	-2.81318	1.92636	-0.227875	0.887885	1.54305	1.02257	699	-0.562402	-2.73078	-1.39585	0.641276	-2.08655	-2.43119
700	-2.79069	-2.58499	-0.446472	1.23004	-0.869664	-3.74241	-2.48424	-1.69265	-1.34273	700	-9.91166	-0.552361	2.94957	-3.25234	1.03632	0.220812	0.909712	1.46514	1.05654	700	0.091723	-3.15967	-2.10862	0.0552794	-2.10518	-2.34407
701	-2.64997	-2.71156	-0.590177	0.577103	-1.00741	-3.63672	-2.74067	-1.5388	-1.84205	701	-9.74897	-0.772787	3.02041	-2.72676	1.63799	-0.206897	0.969832	1.39356	0.993052	701	-0.668226	-2.95787	-2.15652	0.6477	-2.15052	-2.46108
702	-2.58296	-2.65994	-0.776025	0.916476	-1.23979	-2.76759	-2.46784	-0.659716	-1.64396	702	-9.84309	-0.100779	2.7599	-3.15714	1.46982	-1.07211	1.00149	1.57591	0.980831	702	-0.181435	-2.5328	-1.34989	0.421898	-2.27224	-2.54821
703	-2.48858	-3.51973	-0.883487	1.05114	-1.23955	-3.51857	-2.69863	-1.22463	-2.09348	703	-9.73836	-0.132418	2.97557	-3.64025	0.973198	-0.857491	1.01816	1.518	0.83161	703	-0.768759	-2.77897	-2.11509	0.233648	-2.15486	-2.51133
704	-2.51092	-3.38407	-0.456586	1.29228	-0.87689	-3.99206	-2.04138	-1.41372	-1.37555	704	-9.88374	-0.809623	2.55028	-3.56217	2.13386	-0.745951	1.07429	1.30574	0.822896	704	-0.0114555	-2.48891	-2.04194	0.404111	-2.08469	-2.44582
705	-2.7784	-3.40906	-0.937219	1.23308	-1.13047	-3.43664	-2.85896	-1.10542	-2.18432	705	-9.70543	-0.537181	2.55331	-3.3127	1.55913	-0.0786588	0.994403	1.56981	0.822428	705	-0.794554	-2.29808	-1.52597	0.729719	-2.17474	-2.5851
706	-2.69297	-3.26906	-1.60517	0.25768	-1.29269	-3.19038	-2.04808	-1.12245	-1.50448	706	-9.83552	-0.755086	2.77342	-3.21667	1.71096	-0.89841	0.953556	1.41448	0.895833	706	0.0136778	-2.83908	-1.70724	0.689204	-2.14927	-2.35552
707	-2.74657	-2.90504	-0.594813	0.404706	-1.10647	-3.69669	-2.30243	-1.03672	-1.97978	707	-10.0008	-0.544729	2.58498	-3.16288	1.37448	-0.24425	1.02422	1.40424	0.801774	707	-0.729075	-3.2465	-1.45023	0.845832	-2.1884	-2.57492
708	-2.07144	-2.90586	-0.906034	1.09733	-0.963826	-3.43799	-2.29966	-1.03554	-1.777	708	-9.92876	-0.166915	2.72024	-2.93504	1.36444	-0.348008	0.906578	1.38191	0.674331	708	-0.635818	-2.31096	-1.40297	0.909076	-2.22256	-2.5692
709	-1.36727	-2.86973	-1.77353	0.580139	-0.893438	-3.4269	-1.96006	-1.62806	-1.21203	709	-10.1242	-0.692688	2.46753	-3.28449	1.65778	-1.24007	1.13184	1.32607	0.927892	709	-0.0888393	-2.57478	-2.09243	1.08695	-1.64251	-1.91925
710	-2.79069	-2.93972	-1.37381	0.306906	-0.815824	-3.36262	-2.49741	-0.585138	-2.1093	710	-9.83529	0.0655443	2.21752	-3.20654	1.25279	0.149868	1.18435	1.45634	0.780103	710	-0.900378	-2.44597	-1.52144	0.614101	-2.2946	-2.65442
711	-2.13231	-2.71817	-0.597552	1.1741	-1.12931	-3.29699	-2.92341	-1.21934	-1.53202	711	-10.3293	-0.272817	2.55685	-3.59285	1.47199	-0.245839	1.15805	1.43455	0.811733	711	-0.231702	-2.04667	-1.72148	0.533564	-2.27534	-2.69639
712	-2.81805	-2.83277	-0.657183	0.60898	-1.20319	-3.48281	-2.41147	-1.01969	-1.57422	712	-10.6209	-0.753036	2.41776	-3.20458	1.04633	-0.422421	1.11426	1.4728	0.924652	712	-0.286598	-2.65588	-1.60042	0.784564	-2.36477	-2.86428
713	-2.10606	-2.14663	-0.668562	0.178963	-1.22603	-3.2601	-2.25253	-1.49006	-1.40661	713	-10.3256	-0.337446	2.15136	-3.45479	1.55442	-0.444729	1.1437	1.14834	0.996653	713	-0.303794	-2.76466	-2.30024	1.09831	-2.29398	-2.75108
714	-2.87389	-3.93703	-1.0038	0.695504	-0.955436	-3.27798	-2.61662	-1.557	-1.28939	714	-10.0989	-0.269103	2.04153	-3.41004	1.47164	-1.13699	1.11119	1.06697	0.820326	714	-0.303794	-2.80998	-2.14163	0.74059	-2.24057	-2.64869
715	-2.94928	-3.76606	-2.18905	0.771836	-1.06475	-2.89592	-2.41378	-1.0238	-1.51444	715	-10.3009	-0.164407	2.36458	-2.83132	1.06661	-0.429522	1.11751	1.32396	0.907452	715	-0.34877	-2.50084	-1.32852	0.892771	-2.34055	-2.73963
716	-2.88618	-2.87076	-0.773707	0.438101	-0.73588	-3.00954	-2.54269	-1.05786	-1.44998	716	-10.4385	-0.570773	2.62341	-3.33626	1.40604	0.00120229	1.1535	1.31251	0.889007	716	-0.288582	-2.61676	-1.50396	0.881407	-2.4188	-2.88781
717	-2.90237	-3.25027	-1.65701	0.367407	-0.947744	-2.78887	-2.46761	-0.857025	-1.57305	717	-10.2758	-0.722265	2.12169	-3.14438	1.14556	-1.54307	1.135	1.35234	0.780678	717	-0.383163	-2.72649	-1.7053	0.60916	-2.30826	-2.66078
718	-2.24008	-3.06506	-1.53437	1.59522	-1.21601	-2.68158	-2.29504	-1.4466	-1.50741	718	-10.3654	-0.361079	2.50208	-3.3236	0.950966	-1.18644	1.09796	1.10004	0.808105	718	-0.309086	-2.7575	-2.16623	0.0621967	-2.48339	-2.83248
719	-2.44447	-3.15612	-1.49308	0.851637	-0.854281	-3.09578	-2.50134	-1.4466	-1.46873	719	-10.7266	-0.61078	2.4702	-2.78724	0.76391	-0.0776536	1.15543	1.11104	0.800663	719	-0.229718	-2.79996	-2.35786	0.492554	-2.44302	-2.92915
720	-2.92862	-2.95851	-1.50045	0.396249	-0.545692	-3.40563	-2.12431	-0.804174	-1.18507	720	-10.5902	-0.696245	2.36279	-3.28298	0.729359	-0.571573	1.27249	1.37796	0.792056	720	-0.189372	-2.88488	-1.32076	0.767765	-2.46165	-2.92788
721	-2.80577	-2.81997	-1.4935	0.358733	-0.539165	-3.21415	-1.9224	-0.843519	-1.10009	721	-10.7054	-0.612999	2.16416	-3.33619	1.23092	-1.02065	1.14702	1.27523	0.746505	721	-0.219135	-2.44311	-1.36219	0.851761	-2.31695	-2.75553
722	-2.02565	-2.75575	-1.70653	0.626762	-0.636823	-2.92173	-2.32438	0.131281	-1.08427	722	-10.4276	-0.552771	1.52296	-4.13439	1.09902	-0.110726	1.06268	1.26012	0.627455	722	-0.227733	-2.90157	-1.69365	1.39625	-2.46724	-2.83566
723	-2.36629	-2.64177	-1.27836	0.676421	-0.858011	-3.16187	-2.14672	-0.858199	-1.40661	723	-10.7176	-0.495184	1.73812	-3.00518	1.47102	-0.559868	1.3282	1.09512	0.787411	723	-0.254189	-2.61629	-1.80499	1.20158	-1.67543	-2.12403
724	-2.80577	-2.79085	-1.22589	1.09646	-0.759887	-2.74383	-2.12986	-0.763656	-1.28822	724	-10.1646	-0.320119	2.04011	-3.53896	1.3947	-1.2378	1.24621	1.34173	0.727177	724	-0.326282	-2.87534	-1.59524	1.00542	-2.45296	-2.94886
725	-1.88939	-2.63785	-1.82958	0.480604	-0.503971	-2.96314	-2.11923	-0.938062	-1.24485	725	-10.0891	-0.336747	1.81741	-2.95229	1.04887	-0.707788	1.12748	1.09145	0.791213	725	-0.383163	-2.72077	-2.19148	0.0908542	-2.33931	-2.72183
726	-2.51371	-3.57218	-1.83106	0.621774	-0.854748	-3.19378	-2.09128	-0.710805	-1.15636	726	-10.9848	-0.913753	2.04722	-3.54448	1.23683	-0.225022	1.30575	1.32623	0.742998	726	-0.327605	-2.36678	-1.47289	0.962932	-2.3952	-2.89926
727	-1.89833	-3.22364	-1.53353	0.236212	-0.647079	-2.68136	-2.14719	-1.10777	-1.32925	727	-10.8827	-0.846519	1.18111	-3.18131	0.687723	-0.976164	1.15711	1.05925	0.755781	727	-0.229056	-2.87343	-2.23356	0.735154	-2.26665	-2.8274
728	-2.62763	-3.2067	-0.863681	0.375214	-0.608388	-2.76601	-1.87735	-0.757196	-1.15518	728	-10.8567	-0.289107	2.099	-3.54262	1.50635	-0.79676	1.1427	1.25311	0.635567	728	-0.246914	-2.74844	-1.56611	0.785058	-2.33	-2.83121
729	-1.87487	-3.03739	-1.07313	0.535901	-0.714437	-3.02312	-2.51797	-0.901654	-1.10888	729	-10.5404	-0.608803	1.75757	-3.16381	0.995821	-0.499591	1.20149	1.15303	0.619544	729	-0.338849	-2.42069	-1.65545	0.300845	-2.34738	-2.8611
730	-2.67565	-2.71115	-0.883066	1.02837	-0.899032	-2.78615	-1.98755	-0.654431	-1.05438	730	-10.4069	-0.338157	1.76146	-3.25359	1.24102	-0.786676	1.30442	1.18903	0.449924	730	-0.326943	-2.60675	-1.56223	0.633865	-2.22256	-2.61562
731	-2.90014	-2.46853	-0.43994	0.678373	-0.518888	-3.22275	-2.01181	-1.11952	-1.07665	731	-10.8195	-0.398687	1.70841	-3.00226	1.26774	-0.384874	1.10577	0.996397	0.67073	731	-0.224426	-2.19026	-2.12609	0.837432	-2.25485	-2.7479
732	-2.7946	-2.97813	-0.506525	0.600523	-0.430786	-2.6963	-2.23613	-0.736056	-1.25482	732	-10.6169	-0.940557	1.67419	-3.25186	1.13266	-0.60082	1.14187	1.15566	0.462279	732	-0.19797	-3.14011	-1.53892	1.13982	-2.19523	-2.70911
733	-2.62149	-2.82389	-0.198465	0.570597	-0.589043	-2.89819	-1.99402	-1.19468	-1.22961	733	-10.8711	-0.570219	1.74395	-3.29548	1.44011	-0.939492	1.17554	1.01049	0.605985	733	-0.348108	-3.09336	-2.1753	0.923899	-2.28031	-2.77779
734	-2.61534	-1.88109	-1.1709	0.500121	-0.555947	-2.80675	-1.75815	-1.19292	-1.78989	734	-11.1817	-0.928354	1.82152	-3.65154	0.58316	-0.547741	1.11078	1.05345	0.461301	734	-0.87789	-2.75082	-2.20378	0.956015	-2.32875	-2.79496
735	-2.81582	-2.27093	-0.512635	0.618305	-0.171142	-2.65895	-1.79442	-0.643861	-1.74359	735	-11.1039	-0.757425	1.41412	-3.12419	1.52647	-0.954893	1.0642	1.1322	0.401321	735	-0.873922	-2.45456	-1.64056	0.86609	-2.21821	-2.74154
736	-1.68501	-2.19082	-0.56447	0.713286	-0.909753	-2.88845	-1.9432	-0.636227	-1.81216	736	-11.1688	-0.782927	1.67443	-3.49354	1.00843	-0.374498	1.17579	1.15674	0.2572	736	-0.889795	-3.00367	-1.61984	0.764306	-1.82882	-2.27475
737	-2.79962	-3.52407	-0.677412	0.471063	-0.276957	-3.12113	-2.0587	-0.683205	-1.78345	737	-10.8079	-0.814687	1.70182	-3.15538	0.516658	-0.922145	1.1531	1.06086	0.324904	737	-0.908976	-2.84385	-1.59006	0.769247	-2.40825	-2.86746
738	-2.23841	-3.15364	-0.67973	0.187854	-0.210531	-2.92965	-1.97739	-1.22228	-1.71722	738	-11.4019	-0.5479	1.98228	-2.84055	1.29264	-0.859404	1.14985	1.09185	0.424813	738	-0.795215	-2.40733	-2.19213	1.16502	-2.43309	-2.96095
739	-2.90237	-3.42785	-0.609984	0.211491	-0.359465	-3.12022	-2.08989	-1.27572	-1.59415	739	-10.8061	-1.05896	1.66678	-3.67368	1.09366	-1.1687	1.19368	1.02082	0.253974	739	-0.825639	-2.95453	-2.14228	0.800375	-2.41135	-2.93169
740	-2.26577	-3.01571	-0.528649	0.58968	-0.605825	-3.30672	-2.50711	-1.17883	-2.37479	740	-11.1605	-1.06379	1.31111	-3.71789	1.08608	-1.05006	1.34	0.937379	0.40626	740	-0.217151	-2.71838	-2.10603	1.02074	-1.65679	-2.05725
741	-1.31868	-3.04771	-1.1572	0.792654	-0.390464	-2.88959	-2.39599	-1.03026	-2.32966	741	-11.1421	-1.21721	1.13819	-3.44171	1.417	-0.959822	1.39231	0.950613	0.48237	741	-0.15035	-3.37674	-2.11833	0.726261	-1.7338	-2.18635
742	-2.23729	-2.9166	-0.530967	0.322085	-0.332895	-3.19717	-2.31421	-1.15769	-2.40937	742	-11.2489	-1.19746	1.61999	-3.41277	1.3489	-1.89134	1.37945	0.928506	0.497469	742	-0.352738	-2.82715	-2.14746	0.823103	-1.79156	-2.21878
743	-2.69576	-2.30521	-0.367455	0.603776	-0.350375	-3.04689	-2.44104	-1.44014	-2.49024	743	-10.6818	-0.859602	1.17582	-3.61657	0.748991	-1.05865	1.32122	0.891595	0.510546	743	-0.346786	-2.81284	-2.05488	0.949098	-2.25237	-2.74281
744	-2.75998	-1.94386	-0.950072	0.600089	-0.340586	-2.91403	-2.51127	-0.288	-2.45156	744	-11.2664	-1.3315	1.34735	-3.10028	1.47518	-1.05846	1.26104	1.10379	0.438827	744	-0.261465	-3.05281	-1.51044	0.757883	-2.46849	-2.91389
745	-2.38081	-2.25875	-0.376305	0.533299	-0.563638	-2.69788	-2.34748	-0.778336	-2.99661	745	-11.1506	-1.08262	0.971454	-3.65718	1.34367	-0.855772	1.36943	0.932855	0.288348	745	-0.792569	-2.78565	-2.11703	0.340866	-2.57158	-3.06334
746	-2.77617	-2.45594	-0.717868	0.268089	-0.506768	-3.18563	-2.49833	-0.246307	-2.28864	746	-11.075	-1.15202	1.35518	-3.76042	1.39434	-0.476343	1.41229	1.05958	0.343683	746	-0.424831	-3.30231	-1.41916	0.818162	-2.00147	-2.2862
747	-2.70693	-2.81522	-0.751793	0.333579	-0.458988	-2.73274	-1.90161	-0.310315	-2.09465	747	-11.0305	-1.73143	0.854316	-3.50358	1.18587	-0.98401	1.62385	1.02437	0.318934	747	-0.127201	-2.74462	-1.60237	0.910558	-2.01948	-2.17172
748	-1.97372	-3.58312	-0.245875	0.703744	-0.49628	-2.97152	-2.08874	-0.575742	-1.93876	748	-11.285	-1.24314	1.07121	-3.41344	1.52488	-1.14098	1.54181	1.0894	0.217124	748	-0.0637061	-3.43923	-1.43469	0.676851	-2.46041	-2.9565
749	-2.32776	-2.51458	-0.527807	0.468894	-0.0678898	-2.73613	-2.08527	-0.268622	-2.09465	749	-11.3704	-0.956208	1.00643	-3.30622	1.11361	-1.29963	1.70915	1.12106	0.420369	749	-0.572323	-3.32664	-1.48907	1.48717	-1.81826	-2.23468
750	-2.47741	-3.28641	-1.82368	0.538287	-0.0289664	-2.81444	-2.10606	-0.29857	-2.92217	750	-11.3978	-0.993249	1.28614	-3.44614	1.07438	-1.05982	1.56651	1.12898	0.193726	750	-0.938078	-3.16444	-1.35636	1.22925	-2.45979	-2.86365
751	-1.98991	-3.3244	-0.139887	0.271776	-0.382773	-3.26598	-2.15689	-1.05786	-2.04601	751	-11.1212	-1.37085	0.730231	-3.60176	0.935755	-1.09257	1.56753	1.04842	0.263812	751	-0.237654	-2.70502	-2.1876	1.31473	-2.24926	-2.45409
752	-2.94314	-3.03553	-1.40816	0.578404	-0.100986	-3.05458	-2.13217	-0.427174	-2.07472	752	-11.5112	-0.94585	1.10891	-3.54672	1.59092	-0.714921	1.63608	1.08329	0.355596	752	-0.278661	-3.35527	-1.66646	0.866584	-2.51072	-3.06779
753	-1.79893	-2.7064	-0.533707	0.486893	-0.138744	-2.70942	-2.06171	-1.079	-2.73522	753	-10.9457	-1.27003	1.05697	-3.4914	1.37286	-1.59638	1.60756	1.03438	0.1013	753	-1.18015	-3.12103	-2.10279	1.14179	-2.32565	-2.84139
754	-1.89945	-2.39668	-0.811846	0.740609	-0.266469	-2.57747	-1.92841	-0.708456	-2.61332	754	-11.153	-0.552084	0.842067	-3.19365	1.07347	-1.24843	1.65187	0.94027	0.161735	754	-1.08755	-3.02466	-1.89822	0.407075	-2.0114	-2.27666
755	-2.66951	-2.42724	-0.410651	0.269607	-0.717234	-2.69177	-2.0587	-0.977994	-2.52482	755	-11.404	-0.540858	1.33436	-3.9036	1.33704	-0.513858	1.60135	1.01217	0.119691	755	-0.85408	-3.13105	-2.00892	0.418933	-2.41321	-3.01755
756	-1.986	-2.96368	-0.613988	-0.275775	-0.0932949	-2.92987	-2.30127	-0.930428	-1.7688	756	-11.2362	-0.937796	1.37631	-3.8135	1.05754	-1.25683	1.64771	0.990415	0.207955	756	-0.158286	-3.26844	-2.04323	1.07608	-2.15424	-2.47253
757	-1.33711	-2.45966	-0.66814	0.902164	-0.1187	-3.01837	-2.35718	-0.687316	-1.95634	757	-11.5026	-1.13499	1.72639	-4.25908	0.926069	-1.46036	1.78381	1.14528	0.356547	757	-0.470467	-3.17446	-1.46318	1.15662	-1.48601	-1.79396
758	-1.87711	-1.97484	-0.945015	0.911271	-0.448966	-2.68294	-1.88313	-0.318536	-1.9452	758	-11.1261	-1.23716	1.40389	-3.53983	1.14443	-1.84591	1.66969	0.993568	0.318786	758	-0.278	-2.73317	-1.5577	1.48519	-2.19337	-2.45091
759	-2.62484	-3.47781	-0.612091	0.211491	0.0153176	-2.66529	-2.63094	-0.956854	-1.82799	759	-11.0243	-1.47558	0.975003	-3.5956	1.52494	-1.14665	1.64614	1.0247	0.285497	759	-0.623912	-2.51753	-2.11509	0.753436	-2.06109	-2.32435
760	-1.8732	-3.13547	-0.572267	0.629798	0.0418881	-2.6164	-2.07649	-0.421888	-2.45684	760	-10.7107	-1.11958	1.08452	-3.39171	1.1937	-1.53581	1.59907	1.0979	-0.0178043	760	-0.424831	-3.23791	-1.52921	0.741578	-2.12505	-2.45027
761	-2.82531	-2.41031	-0.792039	0.24532	-0.1483	-2.96111	-2.17722	-0.537573	-2.07941	761	-10.9376	-1.12579	0.946792	-3.36815	0.975441	-0.568136	1.58677	1.06264	0.200405	761	-0.668226	-2.77611	-1.56158	1.38489	-2.23187	-2.49606
762	-2.64215	-2.45718	-0.927948	0.130389	-0.228245	-2.28459	-2.67945	-1.2722	-1.76	762	-11.131	-0.798578	0.720593	-3.09114	1.00807	-1.05531	1.43961	0.994927	0.276917	762	-0.649707	-2.6931	-2.20313	1.01481	-2.31385	-2.56538
763	-2.19038	-2.36942	-0.981679	0.445257	-0.10052	-3.02335	-2.10167	-1.11952	-2.21538	763	-11.637	-1.22396	1.02795	-3.72946	1.53173	-1.76437	1.67844	1.08652	0.0962666	763	-0.633172	-2.48939	-2.11897	1.29249	-1.71828	-2.00892
764	-2.26689	-2.31925	-0.547403	0.120197	-0.164616	-3.59145	-2.42441	-0.905765	-1.75473	764	-11.4469	-0.729548	0.976522	-3.40485	1.10935	-1.87675	1.67561	1.09589	0.0210269	764	-0.601425	-3.04899	-2.03222	1.01135	-1.81392	-2.24104
765	-2.28308	-2.07766	-0.470704	0.520722	0.0253398	-2.98148	-2.14534	-1.03965	-1.8866	765	-11.3768	-0.664654	1.10674	-2.98662	1.1728	-1.02052	1.62236	1.07264	0.223388	765	-0.496923	-2.78469	-2.12027	1.06966	-1.73504	-2.09668
766	-1.84472	-2.49393	-0.579642	0.451112	-0.326835	-2.40455	-2.56048	-0.591598	-2.17787	766	-11.2691	-1.09278	0.892055	-3.34129	0.739208	-1.50345	1.65236	1.14308	0.184222	766	-0.557772	-3.19116	-1.57518	0.913029	-1.76734	-2.15328
767	-1.98712	-2.02687	-1.56704	0.376732	0.0430534	-2.82757	-2.27817	-0.466518	-1.93407	767	-11.0408	-0.87641	1.38007	-3.56881	1.32228	-1.21105	1.60233	1.16352	0.272566	767	-0.681454	-3.20261	-1.50785	0.998013	-1.64437	-1.99938
768	-1.86482	-3.4995	-1.25624	0.305822	-0.334293	-2.43035	-2.77556	-1.19703	-2.06476	768	-10.8897	-1.54133	1.47764	-3.5931	0.8622	-1.58461	1.55334	1.13318	0.14855	768	-0.734366	-2.82858	-1.49749	0.928346	-2.24243	-2.57238
769	-1.85868	-3.24098	-0.969879	0.64758	-0.572728	-2.74677	-2.82199	-0.39194	-1.92879	769	-11.0734	-0.811468	0.742769	-3.46319	1.02124	-0.907813	1.49289	0.928195	0.273557	769	-0.75024	-2.89299	-1.60884	0.791975	-2.25547	-2.55648
770	-1.23325	-2.9007	-1.50193	0.287389	-0.404216	-3.2945	-2.09197	-0.418365	-1.86432	770	-11.4305	-1.07182	1.28037	-3.33696	0.86675	-1.57326	1.57779	1.06715	0.248606	770	-0.830931	-3.09956	-1.40233	1.24457	-1.70337	-2.00383
771	-2.16693	-2.87778	-2.00131	0.532432	-0.0830396	-3.14851	-2.77486	-0.804174	-1.74477	771	-11.1793	-1.03094	1.64504	-3.43642	0.639715	-1.42025	1.53272	0.921091	0.221876	771	-0.51412	-2.93163	-2.12868	1.4427	-2.30826	-2.60863
772	-2.71419	-2.69319	-0.934058	0.56973	-0.281386	-3.02539	-2.02105	-0.788319	-2.51369	772	-11.8092	-1.53942	1.50128	-3.32308	0.450807	-1.69336	1.44312	0.936569	0.0371564	772	-1.31045	-3.23171	-1.48843	0.943169	-2.34552	-2.51005
773	-1.22599	-2.44974	-1.72444	0.513132	0.0269713	-2.53718	-2.40708	-2.0262	-1.93289	773	-11.6997	-1.29515	0.906899	-3.57704	0.900781	-1.10388	1.70067	0.721556	0.201249	773	-0.57563	-3.12246	-2.20702	1.27718	-1.75119	-2.04644
774	-1.97483	-1.99177	-1.22358	0.544358	-0.482295	-3.0238	-2.67298	-0.77129	-1.75356	774	-11.798	-1.40997	0.957273	-3.07589	0.925581	-1.3137	1.56648	0.830632	0.353013	774	-0.759499	-3.32807	-1.48454	1.11363	-2.38278	-2.71229
775	-1.51581	-2.26494	-0.912355	0.337265	-0.22638	-3.17839	-2.46437	-0.808285	-1.69788	775	-11.1247	-0.735071	1.33063	-3.36972	1.02416	-1.64141	1.66852	0.851929	0.314972	775	-0.750901	-3.20356	-1.60172	1.51187	-1.7928	-1.9733
776	-2.808	-2.4929	-0.896341	0.465208	0.0570379	-3.33501	-2.612	-0.280366	-1.57715	776	-11.7502	-0.800519	1.32387	-3.28356	0.878061	-1.32625	1.6336	0.869737	0.287183	776	-0.854741	-2.94642	-1.5331	1.29645	-2.34552	-2.5374
777	-2.51259	-2.46606	-0.709861	0.646062	0.0127538	-3.11773	-2.5383	-0.411318	-1.4113	777	-11.3105	-1.40883	1.54025	-3.35174	0.298562	-1.42222	1.61297	0.707325	0.276368	777	-0.813734	-3.26224	-1.48843	1.06225	-1.95675	-2.20225
778	-2.24008	-2.91288	-0.982732	-0.0136009	-0.552218	-2.51636	-2.57503	-0.542858	-1.12295	778	-11.9283	-1.44265	1.4395	-3.52262	0.420026	-1.80467	1.65228	0.810345	0.129248	778	-0.771405	-3.3233	-1.55252	0.779623	-2.5486	-2.74027
779	-2.13454	-2.72808	-0.654444	0.144267	-0.459687	-2.85496	-2.60853	-0.892259	-1.45349	779	-11.5414	-1.93692	1.17255	-3.38591	0.748764	-1.45082	1.61615	0.757707	0.0982075	779	-0.659628	-3.28991	-2.04258	0.88783	-2.53059	-2.79433
780	-1.69897	-3.34174	-0.844506	0.404055	-0.0107867	-3.3925	-2.28811	-0.531113	-1.36675	780	-11.8851	-1.75343	1.04951	-3.10496	1.01373	-1.58075	1.7223	0.662189	0.290851	780	-0.71717	-2.98649	-1.63409	0.796916	-1.85428	-1.96822
781	-1.75816	-2.83876	-1.48444	0.0679353	-0.118001	-3.61114	-2.84209	-1.36145	-1.22082	781	-12.008	-1.56989	1.00864	-4.13157	0.929384	-1.70062	1.72159	0.60479	0.172751	781	-0.681454	-2.86102	-2.22191	1.34092	-1.90645	-2.0369
782	-2.31435	-2.36426	-1.18417	-0.45381	0.0789468	-3.18518	-2.3849	-0.934539	-1.36265	782	-11.9561	-1.02615	0.968651	-3.46364	0.561578	-1.34619	1.64	0.670226	0.261001	782	-0.571662	-2.98936	-2.1876	1.07361	-2.49084	-2.78034
783	-3.08833	-3.11152	-0.890862	-0.516046	-0.108212	-2.49916	-2.26963	-1.35617	-1.38375	783	-11.8878	-1.37132	1.17203	-3.81427	1.17082	-1.47754	1.60902	0.580914	0.271148	783	-0.678147	-2.91159	-2.26981	1.07904	-2.52189	-2.74027
784	-2.33892	-2.91474	-0.712179	-0.211587	-0.377645	-3.15621	-2.78919	-1.53762	-1.28705	784	-11.9272	-1.38873	1.43853	-3.7176	1.34191	-1.00891	1.74458	0.794843	0.236278	784	-0.647061	-3.36195	-1.67163	0.903641	-2.56661	-2.6595
785	-1.63308	-2.81955	-0.613988	0.434631	-0.316347	-3.29472	-2.831	-1.19468	-1.28353	785	-12.2387	-1.58278	1.0509	-3.5363	0.473884	-1.93991	1.79826	0.624791	0.357671	785	-0.629865	-3.24602	-2.15976	0.81421	-1.9847	-2.20479
786	-1.64927	-2.07952	-0.795831	0.50771	-0.465514	-2.50006	-2.39738	-0.516432	-1.20852	786	-11.8001	-1.17687	1.03578	-3.65974	1.00749	-1.37917	1.88741	0.701842	0.30168	786	-0.752885	-2.94642	-1.54993	1.17342	-2.07227	-2.31227
787	-1.62973	-3.52778	-1.13634	-0.239777	0.278691	-2.91177	-2.55701	-0.349659	-1.14288	787	-12.1158	-1.34329	0.620148	-3.60368	0.498684	-1.4374	1.92948	0.89653	0.413743	787	-0.602748	-3.05281	-1.55446	0.694639	-2.04308	-2.34979
788	-3.0297	-2.13445	-1.0057	-0.441883	0.114374	-2.52383	-1.98986	-0.997373	-1.04207	788	-12.4873	-1.63423	0.713495	-3.14692	0.63627	-1.55601	1.73327	0.760361	0.334059	788	-0.638463	-3.44353	-2.33002	1.26581	-2.60822	-2.97939
789	-2.25739	-3.19163	-0.877166	-0.22373	-0.00798978	-2.76827	-2.28302	-2.11252	-1.74594	789	-12.5398	-1.2698	0.635076	-3.49249	0.297326	-2.21685	1.89091	0.55548	0.226346	789	-1.30317	-2.6931	-2.26075	0.458955	-2.03935	-2.27666
790	-1.67887	-2.90627	-0.93174	-0.694732	-0.159022	-2.92965	-2.59467	-0.505862	-1.04032	790	-11.912	-1.90394	0.95476	-3.11849	0.761797	-1.36963	1.83304	0.907994	0.383452	790	-0.682116	-3.07618	-1.54928	1.48667	-2.13189	-2.54948
791	-2.98279	-2.45346	-1.12412	0.319483	0.457925	-2.61889	-2.48332	-1.11188	-1.03563	791	-12.1713	-2.07551	1.44327	-3.23147	0.602857	-1.68703	1.73244	0.585263	0.240187	791	-0.607377	-3.0175	-2.19277	0.937239	-2.63492	-2.92343
792	-2.65332	-2.53523	-0.279378	-0.0962214	-0.0410863	-3.041	-2.34448	-1.26691	-1.03211	792	-12.0656	-1.88609	1.07118	-3.60153	0.569508	-2.01578	1.63243	0.707001	0.232209	792	-0.715847	-2.86293	-2.23809	1.6517	-2.73305	-2.98893
793	-2.10383	-2.58623	-1.00928	-0.0936192	0.201777	-2.39776	-2.65543	-2.20471	-1.31694	793	-12.0224	-2.01499	0.893836	-3.15535	1.08355	-2.01514	1.75769	0.564814	0.296232	793	-0.660951	-2.87724	-2.64464	2.44176	-2.04184	-2.25503
794	-2.83816	-3.30995	-0.340484	0.196095	-0.117768	-2.61685	-2.17375	-1.10131	-1.33452	794	-11.8168	-1.42965	0.732289	-3.74334	0.450287	-1.54245	1.71148	0.617788	0.205693	794	-0.749578	-2.99174	-1.65933	2.08848	-2.76223	-2.96604
795	-1.45215	-2.75761	-0.142626	0.100029	-0.0312972	-2.47087	-2.38929	-1.26691	-1.4365	795	-11.5778	-1.56484	0.89454	-3.60672	1.14784	-1.32583	1.87461	0.77934	0.241579	795	-0.789262	-3.46547	-1.76033	2.24462	-2.01265	-2.35234
796	-1.66937	-3.26245	-0.877166	-0.029648	0.144674	-2.2735	-2.18507	-1.77369	-1.4699	796	-11.8634	-1.74175	0.884419	-2.97418	0.923566	-0.988452	1.72539	0.570621	0.125326	796	-0.62259	-2.9178	-2.36821	2.07415	-2.03997	-2.35806
797	-1.28015	-3.04379	-1.25434	-0.154121	-0.208666	-2.51908	-2.67737	-1.72906	-1.38258	797	-11.8672	-1.72087	1.04366	-3.13538	0.929742	-1.31574	1.87821	0.652132	0.241994	797	-0.664258	-3.11005	-1.72213	2.40866	-1.94123	-2.28238
798	-1.52028	-2.59758	-0.798571	-0.46552	0.315051	-2.63632	-2.98371	-2.34917	-1.43532	798	-12.2011	-1.60971	1.44968	-3.23878	0.833207	-1.11997	1.88376	0.504449	0.0593093	798	-0.678809	-2.9197	-2.61228	2.25993	-2.01389	-2.29701
799	-1.35442	-2.88769	-0.645594	-0.430824	-0.348511	-2.66257	-2.0363	-0.713741	-1.42888	799	-11.994	-2.11636	1.23269	-3.54573	1.46907	-0.871012	1.82524	0.707973	0.0419484	799	-0.749578	-3.06426	-1.94289	1.78955	-2.03376	-2.3447
800	-1.36559	-2.85383	-0.451951	0.0505872	-0.431485	-2.42424	-2.53183	-0.770115	-1.21496	800	-12.1072	-2.17124	1.06738	-3.559	0.886772	-1.64806	1.84269	0.702029	0.0234229	800	-0.699973	-3.23552	-1.97914	1.52867	-2.06978	-2.44455
801	-2.48021	-2.66552	-1.8536	-0.437329	-0.0208088	-2.88053	-2.7982	-1.75314	-1.56191	801	-11.6437	-2.0516	0.955878	-3.09768	0.953404	-1.77841	1.87821	0.64468	-0.0521246	801	-0.795215	-2.8033	-1.90275	2.04797	-2.04432	-2.48398
802	-2.1781	-2.29592	-0.693847	0.146869	-0.299798	-2.15536	-2.69355	-1.64098	-1.28588	802	-12.3334	-1.61912	0.966842	-3.55781	0.913425	-0.857199	1.74174	0.595444	-0.042313	802	-0.734366	-3.90342	-2.02381	1.85033	-2.60077	-2.91897
803	-3.03249	-2.10905	-0.223329	0.439402	-0.243395	-2.62047	-2.69655	-1.47068	-1.49862	803	-12.2609	-1.96661	0.84407	-3.39395	0.538435	-1.40517	1.74723	0.697979	-0.0297842	803	-0.805136	-3.68683	-1.99273	1.37698	-2.61753	-3.03345
804	-1.67552	-3.56763	-1.60517	0.19089	-0.24759	-2.83504	-2.32438	-1.31682	-1.38785	804	-11.7053	-1.93882	0.989143	-3.41549	1.39876	-1.16014	1.75786	0.726079	-0.0189554	804	-0.756192	-3.2069	-1.88397	1.31127	-1.9375	-2.18953
805	-1.71349	-3.40183	-1.66249	0.436583	0.281255	-2.46091	-2.63417	-1.36145	-1.64396	805	-11.9256	-2.28047	1.31431	-3.16282	1.06437	-1.37002	1.84036	0.570122	-0.0648274	805	-0.834899	-3.36863	-1.91829	0.758377	-2.02507	-2.33389
806	-2.65611	-3.0217	-1.42797	0.105234	-0.446169	-2.95998	-2.67183	-1.3362	-1.5162	806	-12.4293	-2.11416	1.09286	-3.3326	0.499106	-1.58963	1.60786	0.619558	-0.129185	806	-0.76942	-3.15872	-1.83995	1.04545	-2.10332	-2.45727
807	-2.937	-2.72416	-1.50045	-0.113136	-0.300964	-2.58041	-2.76008	-1.34325	-2.05245	807	-12.308	-1.88731	1.05254	-3.59974	0.908614	-1.59923	1.59409	0.706677	-0.123362	807	-1.59551	-2.70598	-1.79852	1.07559	-2.72063	-3.03981
808	-1.7671	-2.93229	-1.9343	0.605077	-0.310986	-3.07654	-2.58543	-1.78954	-1.44646	808	-12.3417	-2.02114	0.901583	-3.52047	1.40091	-1.79497	1.67074	0.557723	-0.0409076	808	-0.826301	-2.86198	-2.37922	1.47234	-2.22877	-2.53867
809	-2.05804	-2.50756	-1.30407	0.367841	-0.0219742	-2.79996	-2.60437	-1.78015	-1.73598	809	-12.4772	-1.88853	1.48812	-3.58666	0.599801	-1.22489	1.82306	0.435537	-0.00176849	809	-0.806459	-2.70311	-2.44331	1.07855	-2.37098	-2.72183
810	-1.84863	-2.0946	-1.56472	0.563008	-0.568766	-2.52247	-2.612	-1.18118	-1.54843	810	-12.6733	-1.91552	0.969217	-3.50508	1.22013	-1.45958	1.8914	0.718291	-0.192779	810	-0.744949	-3.35765	-1.81017	1.57512	-2.25733	-2.59336
811	-2.47127	-2.11566	-1.41427	0.101547	-0.486957	-2.88212	-2.62239	-1.71086	-1.39254	811	-12.3038	-2.45901	0.935952	-3.33459	1.10997	-2.34087	1.84932	0.545934	-0.130282	811	-0.797199	-3.26033	-2.38569	1.78017	-2.32316	-2.65124
812	-2.96045	-3.53233	-1.24612	0.103933	-0.633793	-2.06844	-2.18784	-1.78308	-2.53478	812	-12.2353	-1.99992	0.727166	-3.59496	0.883164	-1.47903	1.60401	0.518643	-0.143092	812	-0.742964	-3.24506	-2.29247	0.992084	-2.83738	-3.19562
813	-2.69073	-3.1109	-0.940801	0.334663	-0.548955	-2.34819	-2.92433	-1.46892	-2.60101	813	-12.047	-1.85545	0.751041	-3.59618	1.02699	-1.41937	1.83021	0.585288	-0.191173	813	-0.557772	-3.48742	-2.286	1.51385	-2.29025	-2.66777
814	-1.77827	-3.17842	-1.59464	0.144267	-0.33406	-2.38531	-2.61038	-1.28805	-2.58577	814	-12.4135	-2.37138	1.07317	-3.7024	0.632532	-1.59618	1.78362	0.681205	-0.0440398	814	-0.58952	-3.22312	-1.64056	1.54992	-2.17536	-2.48589
815	-2.91354	-3.5507	-0.766332	0.097644	-0.748932	-2.51545	-2.45999	-1.79483	-2.47383	815	-12.9489	-1.93453	0.895604	-4.76485	0.783802	-1.4088	1.71132	0.568689	-0.0309354	815	-0.735028	-3.03086	-2.2245	2.01486	-2.83738	-3.14156
816	-2.53214	-2.47886	-0.922469	0.1833	-0.568067	-2.06188	-2.91879	-1.64098	-2.57464	816	-12.4271	-2.30026	0.842592	-3.33395	0.827746	-1.16277	1.88958	0.555941	-0.101945	816	-0.682116	-2.91302	-2.14681	1.87948	-2.1915	-2.38731
817	-2.39086	-2.79003	-1.31313	0.408826	-0.38487	-2.57928	-2.31213	-0.650908	-3.25154	817	-12.1435	-1.91852	0.997152	-3.52774	0.533267	-1.72607	1.76107	0.764972	-0.290894	817	-1.3336	-3.15872	-1.53245	2.36221	-2.21945	-2.47762
818	-3.03975	-2.78858	-1.23601	0.475833	-1.15378	-2.35114	-2.93196	-0.980343	-2.56116	818	-12.535	-2.3915	1.27664	-3.54563	0.847346	-1.74105	1.63061	0.719575	-0.148152	818	-0.693359	-3.23886	-1.59071	1.99954	-2.85539	-3.10086
819	-2.41934	-2.62814	-0.835235	0.389743	-1.01837	-1.94984	-3.09644	-1.26163	-2.44394	819	-12.3629	-2.29481	0.890273	-3.12474	0.896621	-1.95415	1.8352	0.618748	-0.10829	819	-0.498908	-3.01703	-1.68458	2.52773	-2.30515	-2.61753
820	-1.89554	-2.77743	-2.03123	0.0503703	-0.69416	-2.7101	-2.4884	-1.78543	-2.33962	820	-12.8506	-2.09638	0.822183	-3.34917	0.98646	-1.755	2.01861	0.492013	-0.195817	820	-0.704603	-2.91589	-2.38181	2.58505	-2.36353	-2.64869
821	-2.53214	-3.82099	-1.19745	0.248356	-0.665025	-2.35612	-3.23968	-1.1248	-2.52248	821	-12.685	-1.92265	0.933274	-3.51553	0.567526	-2.17466	1.96705	0.482168	-0.15957	821	-0.813734	-2.89394	-1.71825	3.23034	-2.28528	-2.64297
822	-3.47197	-2.75017	-1.07818	0.184168	-0.808366	-1.89688	-2.62701	-1.53469	-2.4879	822	-12.5217	-1.78505	1.33404	-3.58567	1.24317	-1.94176	1.66609	0.449083	-0.295084	822	-0.70791	-3.57377	-2.23874	2.74563	-2.92122	-3.1441
823	-1.91173	-3.19638	-0.793092	0.597053	-0.815125	-2.05079	-2.59652	-1.17354	-2.13567	823	-12.7121	-2.16956	0.73824	-3.99098	0.855342	-1.52397	1.75735	0.504674	-0.334799	823	-0.626558	-2.80187	-1.62114	2.51291	-2.50451	-2.81023
824	-1.61465	-2.87964	-0.94354	0.716539	-0.634493	-2.07637	-2.70348	-1.13537	-2.41816	824	-12.4523	-2.22708	0.772209	-3.62698	0.561383	-2.01916	1.91834	0.663123	-0.316956	824	-0.670872	-3.09097	-1.5823	2.13048	-2.29273	-2.56793
825	-1.86091	-2.48072	-1.02677	0.41338	-0.558044	-1.93332	-2.1093	-0.956854	-1.83444	825	-12.908	-1.94382	1.19681	-3.5106	1.04584	-1.92834	1.84532	0.514419	-0.381728	825	-1.23835	-3.3004	-1.66905	2.54404	-2.33062	-2.64488
826	-2.11388	-2.52759	-0.675937	0.737356	-0.717234	-2.51749	-2.58012	-1.63217	-2.28746	826	-12.7236	-2.19429	0.648221	-3.78546	1.15587	-1.72977	1.84168	0.44664	-0.250457	826	-0.479727	-3.09431	-2.35009	2.00399	-2.42067	-2.68685
827	-1.84025	-2.18091	-0.252196	0.213009	-0.435447	-2.23887	-2.31698	-0.896369	-2.80496	827	-12.8344	-2.66251	1.07492	-2.5547	1.13269	-1.86634	1.82247	0.478579	-0.440504	827	-1.17486	-3.43875	-1.67358	1.59043	-2.34552	-2.61117
828	-2.47015	-3.12225	-0.583224	0.310375	-0.604426	-2.2133	-2.21464	-0.825315	-2.08469	828	-13.2432	-2.261	0.805861	-2.97995	0.509637	-1.8596	1.73792	0.765944	-0.413612	828	-0.735028	-3.70496	-1.66905	1.3503	-3.09573	-3.46336
829	-2.63712	-2.53853	-0.748632	0.814122	-0.801141	-1.86542	-2.16266	-0.843519	-2.16146	829	-12.8182	-2.62278	1.06247	-3.55611	0.276687	-1.64981	1.74657	0.603619	-0.350701	829	-0.614653	-3.64342	-1.77586	1.33894	-3.1864	-3.46526
830	-2.09266	-2.92424	-1.16942	0.00916849	-0.573893	-1.68684	-2.61107	-1.05786	-2.14153	830	-12.468	-2.80121	1.24308	-3.26798	0.58979	-2.57993	1.88214	0.669254	-0.360633	830	-0.7218	-3.07857	-1.76356	0.971826	-2.39955	-2.6595
831	-1.89833	-2.73469	-0.916569	-0.277076	-0.777134	-1.82378	-2.45952	-1.42194	-1.96982	831	-12.5734	-2.22797	0.743764	-3.1917	1.0839	-1.63872	1.88552	0.467962	-0.386279	831	-0.741642	-2.94594	-2.47115	0.871525	-2.44116	-2.72819
832	-2.52823	-3.05928	-0.534549	-0.343649	-0.823283	-1.38559	-2.09913	-1.03143	-2.23765	832	-13.2036	-2.95975	0.804439	-3.20288	0.995886	-1.95593	1.87772	0.349265	-0.422353	832	-0.680793	-3.62386	-1.81729	1.44715	-2.31136	-2.67604
833	-1.84249	-3.3944	-0.865577	-0.350372	-1.00368	-2.20719	-2.53576	-0.826489	-1.98271	833	-12.8356	-2.70847	0.716464	-3.21202	0.739435	-1.87568	1.97403	0.606573	-0.441066	833	-0.618621	-2.77038	-1.92605	1.38291	-2.29335	-2.6595
834	-2.1122	-2.51458	-0.651705	0.874623	-0.753827	-2.10488	-1.98062	-1.57168	-2.14036	834	-12.526	-2.25056	0.733973	-3.30738	0.519258	-2.31253	1.86845	0.48314	-0.431509	834	-0.654337	-3.14154	-2.52358	1.22332	-2.33124	-2.57683
835	-2.51595	-2.58251	-0.846824	-0.379863	-0.533106	-1.36568	-2.29134	-1.03965	-1.89539	835	-13.0596	-2.64033	0.724666	-3.20657	1.12112	-2.42148	1.75505	0.537535	-0.552808	835	-0.696666	-3.04947	-1.89822	1.22134	-2.88893	-3.06715
836	-2.09266	-1.98619	-0.837131	-0.370972	-0.524249	-1.87945	-2.43342	-1.00912	-2.24761	836	-13.0438	-2.70203	0.932915	-3.15974	1.02143	-1.71537	2.04988	0.556103	-0.520696	836	-0.742303	-3.37435	-1.98756	1.35969	-2.30888	-2.52214
837	-1.90782	-2.32482	-1.88247	-0.469857	-0.555248	-1.44625	-2.06633	-0.998547	-1.96864	837	-12.6782	-2.88827	1.26916	-3.54598	0.763195	-1.90512	2.00115	0.527852	-0.760001	837	-0.801829	-3.24506	-1.92541	1.12648	-2.32068	-2.51133
838	-1.98265	-3.39625	-1.80387	0.4561	-0.898799	-1.55534	-2.69054	-0.945109	-1.90535	838	-12.5789	-2.65279	1.07048	-3.34876	0.274737	-1.504	2.02062	0.275168	-0.556489	838	-0.825639	-3.33666	-1.93318	0.991096	-2.37409	-2.594
839	-2.64717	-3.14889	-2.05968	0.150989	-0.525414	-2.32511	-2.64827	-0.996198	-2.04952	839	-13.0723	-2.64036	0.343741	-3.53601	0.797388	-2.23277	1.81492	0.43616	-0.461947	839	-0.84945	-3.50602	-1.96749	1.961	-2.91066	-3.10277
840	-1.93407	-2.75905	-1.82874	0.288907	-0.646846	-1.39985	-2.6083	-0.926318	-1.57422	840	-12.6651	-2.58951	0.339819	-3.53922	1.35774	-1.43143	1.97472	0.441655	-0.613832	840	-0.894425	-3.62386	-2.03935	1.26137	-2.40079	-2.56029
841	-1.79781	-2.6521	-0.335849	-0.0162032	-0.679243	-2.21873	-2.17676	-0.965662	-1.69788	841	-12.5672	-2.71169	0.882513	-3.89707	0.325864	-1.4089	1.88502	0.352617	-0.658124	841	-0.951967	-3.37721	-1.97137	1.81228	-2.18405	-2.44773
842	-1.89051	-2.22117	-1.69283	0.110438	-0.785758	-1.87515	-2.34286	-1.21289	-1.82564	842	-12.1651	-2.76461	0.662444	-3.29337	0.919601	-2.13559	1.96773	0.442453	-0.586874	842	-0.737673	-3.00892	-2.00633	1.97435	-2.31385	-2.5304
843	-2.52991	-2.6746	-1.27499	0.537853	-0.103783	-1.83509	-2.48193	-0.973883	-1.95399	843	-12.4309	-2.45466	0.774046	-3.46813	1.14313	-2.17395	1.71347	0.373453	-0.594423	843	-0.704603	-3.12771	-1.89304	1.34981	-2.84359	-3.0061
844	-1.91285	-2.59717	-1.28658	0.335747	-0.635891	-1.99556	-1.9023	-0.638576	-1.86081	844	-12.1761	-2.74671	0.578446	-3.44755	0.729879	-2.23043	1.76779	0.456659	-0.692833	844	-0.658305	-3.32998	-1.80046	1.68135	-2.10145	-2.30273
845	-2.49361	-3.33328	-1.23748	-0.0248772	-0.840297	-1.60831	-2.11276	-1.76605	-1.7225	845	-12.671	-2.77138	0.798045	-3.44889	1.04344	-2.47611	1.78731	0.25174	-0.649544	845	-0.645077	-3.62481	-2.53006	1.93482	-2.71504	-3.06143
846	-1.86203	-3.18379	-0.838606	-0.0914507	-0.578555	-1.63094	-2.12131	-1.35323	-1.69612	846	-12.3451	-2.75884	0.905518	-3.31199	0.730139	-2.14383	1.92282	0.470703	-0.811669	846	-0.689391	-2.67401	-1.69947	1.88294	-2.01327	-2.31418
847	-2.06306	-3.79332	-0.748	0.415115	-0.655469	-1.74909	-2.04946	-1.46657	-1.85788	847	-12.6708	-2.68276	0.596149	-3.36267	1.50446	-2.22651	1.99117	0.319457	-0.572404	847	-0.643093	-3.10004	-2.39087	1.70111	-2.18964	-2.5056
848	-1.97148	-2.63599	-1.50635	-0.130484	-0.255048	-1.51211	-2.20979	-1.30332	-1.83971	848	-12.4866	-2.60045	0.760127	-3.01242	0.881052	-1.89889	1.96075	0.32494	-0.704157	848	-0.742303	-3.14965	-2.44525	1.34882	-2.21014	-2.51196
849	-2.28197	-2.97668	-0.89318	0.22602	-0.661529	-1.80906	-1.99379	-1.43779	-1.8655	849	-12.693	-2.89394	-0.0574976	-3.13599	0.96361	-1.78256	1.77641	0.420047	-0.729603	849	-0.541899	-3.08095	-2.46144	1.90715	-2.71814	-3.0468
850	-2.23506	-2.68493	-1.27604	0.505542	-1.12908	-1.64995	-2.55378	-0.915748	-1.86315	850	-12.64	-3.11841	0.675604	-3.42174	0.516106	-2.37534	2.03291	0.435836	-0.763388	850	-0.789262	-3.0404	-2.36239	1.72631	-2.17908	-2.4172
851	-2.57681	-2.56145	-0.458904	0.144701	-0.436613	-1.70721	-2.09197	-1.6768	-2.11047	851	-12.3752	-2.72595	0.92028	-3.44537	1.05673	-2.05998	1.90354	0.385802	-0.919649	851	-0.70791	-3.17923	-2.37404	1.47531	-2.82434	-3.14665
852	-1.986	-2.38264	-0.605348	0.219515	-0.5979	-1.88376	-2.05131	-1.07371	-1.69026	852	-12.9097	-3.10003	0.578985	-3.14541	0.642966	-2.04065	1.78187	0.422813	-0.902636	852	-0.608039	-3.60334	-1.75774	1.06373	-2.0822	-2.39431
853	-1.93407	-3.26101	-0.365137	0.0364918	-0.844725	-1.81337	-2.87998	-0.885799	-1.71136	853	-12.5815	-3.17353	0.218731	-3.21112	1.08062	-1.90775	1.99451	0.487178	-0.827584	853	-0.696666	-3.64867	-1.80694	1.54893	-2.18716	-2.56729
854	-2.60529	-3.53233	-0.688369	0.402754	-0.431951	-1.54946	-2.38675	-0.662652	-2.14446	854	-12.6494	-3.33085	0.309067	-4.10714	1.24662	-1.82633	1.73595	0.476037	-1.02369	854	-1.3164	-3.45927	-1.85484	1.87355	-2.66039	-2.93297
855	-2.12728	-3.22632	-0.652969	0.778341	-0.452695	-1.48948	-2.41863	-0.943347	-1.60294	855	-12.7345	-3.25208	0.490237	-3.59547	0.189546	-2.75626	2.0128	0.361465	-0.781083	855	-0.697989	-3.91964	-1.81988	1.27273	-2.09649	-2.2951
856	-2.21495	-3.51374	-0.749896	0.53872	-0.345714	-1.85433	-2.29781	-0.602168	-1.74477	856	-12.828	-3.39406	0.565287	-3.33965	0.17856	-2.44437	1.76752	0.333501	-0.85999	856	-0.668226	-3.62863	-1.79982	1.20306	-2.14058	-2.50624
857	-2.59524	-3.02356	-1.1355	0.581874	-0.584848	-1.01938	-2.05039	-0.691426	-2.12219	857	-12.7223	-3.59578	0.682702	-3.57034	1.058	-1.72572	1.76978	0.373528	-0.980459	857	-1.32963	-3.51032	-1.7422	1.58154	-2.72497	-3.08432
858	-2.83034	-2.95149	-0.658448	0.891972	-0.71467	-1.57073	-2.36596	-1.6856	-1.46111	858	-12.7728	-2.80585	0.356375	-3.38296	0.725394	-1.82027	1.74071	0.288465	-1.01609	858	-0.572984	-3.0237	-2.38246	1.96842	-2.58151	-2.90944
859	-2.04575	-3.30375	0.0512281	0.377599	-0.266702	-1.66217	-2.77255	-1.20232	-1.43122	859	-13.078	-2.89112	0.501753	-3.47316	0.381672	-2.2921	1.95644	0.240624	-0.965374	859	-0.578276	-3.16778	-2.42518	1.86861	-2.05798	-2.42611
860	-1.95138	-2.3558	-0.706279	0.259415	-0.790186	-1.7303	-1.91755	-0.701997	-2.7194	860	-13.0479	-2.70362	0.125937	-3.13637	0.931432	-2.17191	1.91469	0.377328	-0.909717	860	-0.48568	-3.42015	-1.73249	1.42738	-2.15052	-2.48652
861	-2.39868	-3.20258	-0.218272	0.246621	-0.499776	-2.26241	-2.46206	-1.72143	-3.43088	861	-13.3833	-3.10817	-0.232633	-3.46745	0.680864	-2.07146	1.64465	0.211601	-1.12184	861	-1.17552	-3.07904	-2.38893	1.3083	-2.71255	-3.06016
862	-2.15967	-2.45718	-0.566367	0.229273	-0.962661	-1.94668	-2.18715	-1.10777	-2.55471	862	-13.5265	-3.29112	0.0645433	-3.64599	1.02546	-1.48724	1.93186	0.303954	-1.05982	862	-0.624574	-3.34811	-2.36045	1.45406	-2.26292	-2.53486
863	-2.70804	-3.15467	-0.977043	0.685312	-0.721895	-2.23797	-2.29342	-1.37085	-1.91883	863	-12.9933	-3.28999	0.544795	-3.69667	1.2459	-2.3161	1.81859	0.144496	-1.14244	863	-1.19602	-3.58378	-2.42518	1.5178	-2.8734	-3.17527
864	-1.88213	-2.92362	-0.631477	-0.43863	-1.24049	-1.85026	-2.17768	-1.27983	-1.57422	864	-13.1009	-2.84423	0.412011	-3.99031	0.920868	-2.47144	1.86377	0.225023	-0.733458	864	-0.660289	-3.21835	-2.38375	1.86169	-2.25112	-2.54503
865	-2.00331	-2.67873	-1.07165	-0.463568	-0.321008	-1.81721	-2.20563	-1.8512	-2.58753	865	-12.9905	-3.10379	0.0132856	-3.87912	0.697441	-1.95765	1.93268	0.126488	-0.916236	865	-0.567032	-3.70734	-2.45043	1.69765	-2.34614	-2.73264
866	-2.15297	-2.87262	-1.54407	0.0427805	-0.399088	-1.79005	-1.91316	-1.71614	-2.50665	866	-13.2235	-2.89952	0.554033	-3.47508	0.721298	-1.90233	1.99612	0.13657	-0.980741	866	-0.663596	-3.68635	-2.44396	1.52719	-2.32565	-2.58064
867	-2.04296	-2.17987	-0.663505	-0.080825	-0.9876	-2.30791	-2.23959	-1.27748	-2.56995	867	-13.2121	-3.10777	0.149425	-3.27603	0.727214	-2.10197	2.03374	0.0477933	-1.04964	867	-0.665581	-2.90396	-2.47827	1.62057	-2.22566	-2.43501
868	-2.74992	-2.58829	-0.732407	-0.0478635	-0.577623	-1.44037	-1.89653	-1.64802	-2.73053	868	-13.075	-3.02469	0.135837	-3.27257	0.813023	-1.53753	1.73148	0.145443	-0.996241	868	-0.645739	-2.93211	-2.40123	1.40959	-2.99264	-3.24395
869	-1.94021	-2.22489	-1.25392	0.049286	-1.15052	-1.8016	-2.47662	-1.54643	-2.51017	869	-13.1492	-3.64506	0.0861401	-3.35055	0.508727	-2.66262	2.05703	-0.0505414	-0.977889	869	-0.651691	-3.21167	-2.35203	1.68431	-2.25671	-2.52086
870	-2.46289	-2.60977	-1.4661	-0.501734	-0.85568	-1.95052	-2.11276	-0.795366	-2.96554	870	-13.3401	-3.08442	0.0058151	-3.28965	0.58979	-2.50231	1.84449	0.193706	-1.16297	870	-1.36534	-3.11673	-1.7053	1.31473	-2.67218	-2.92724
871	-2.45396	-3.44003	-1.60012	-0.0925349	-1.02279	-1.99172	-2.08504	-1.62688	-2.366	871	-13.089	-3.00862	0.255641	-3.47297	1.0617	-2.91319	1.86932	-0.113983	-1.05561	871	-0.71717	-3.77604	-2.41353	1.33153	-2.66287	-3.07987
872	-2.526	-2.97483	-1.51646	0.407742	-0.335459	-2.3104	-1.54376	-1.32739	-2.3408	872	-13.4329	-2.77023	-0.22374	-3.72058	0.191788	-2.40215	1.89756	-0.0701684	-1.13012	872	-0.778019	-3.32474	-2.40835	1.75596	-2.64983	-3.12821
873	-2.45675	-2.79416	-1.41869	0.114558	-0.660131	-1.68752	-2.15804	-1.05903	-2.51251	873	-13.6099	-3.16063	0.347648	-3.68731	0.521534	-2.13815	1.80448	0.101615	-1.15115	873	-0.67484	-3.02991	-1.6671	1.99954	-2.84918	-3.29228
874	-2.17698	-2.87365	-1.25118	-0.0864631	-0.529376	-1.80952	-2.15573	-1.49123	-2.4668	874	-12.8796	-2.85712	0.54126	-3.18362	0.438553	-2.80204	2.00065	0.00331778	-1.1923	874	-0.580921	-3.47215	-2.45561	1.66899	-2.36726	-2.7638
875	-2.14236	-3.0888	-1.15214	-0.0083965	-1.00322	-2.18139	-2.13194	-1.42429	-2.85126	875	-13.583	-3.298	0.133587	-3.53541	0.175634	-2.13579	2.08014	0.000650995	-1.36998	875	-1.14973	-2.96169	-2.4569	1.81574	-2.38403	-2.79751
876	-2.28476	-2.2476	-1.5643	-0.0194559	-0.253417	-2.39844	-1.70062	-1.2904	-2.07238	876	-13.0888	-3.17582	0.215265	-3.25173	0.237683	-2.62747	2.01246	-0.0805116	-1.11836	876	-0.480388	-2.91732	-2.44849	1.29052	-2.24491	-2.67159
877	-2.88115	-2.92383	-0.910037	0.0191437	-0.946812	-2.73885	-2.49163	-1.38377	-2.20542	877	-13.0654	-3.05617	0.226146	-3.70811	0.701959	-2.63149	1.8925	-0.0179667	-1.24908	877	-0.715186	-3.13009	-2.39605	1.70803	-3.05164	-3.47417
878	-2.85267	-2.13114	-0.809949	-0.196407	-0.457356	-2.01322	-2.03306	-1.47949	-2.85712	878	-13.2328	-3.93379	0.76583	-3.90867	0.238431	-2.62008	1.93032	-0.101472	-1.37872	878	-1.1742	-3.16158	-2.51258	1.65961	-3.05847	-3.47417
879	-2.37969	-2.52903	-1.19787	0.625678	-0.487656	-2.55642	-2.05385	-1.19175	-2.03253	879	-13.8291	-3.22184	-0.0654928	-3.60836	1.20092	-2.47786	1.9807	0.141255	-1.29652	879	-0.67947	-3.184	-1.73378	1.60723	-2.38961	-2.78352
880	-2.2077	-2.85486	-0.999168	0.496217	-1.15868	-2.63541	-2.29042	-1.74374	-2.04249	880	-13.2994	-3.33183	0.116326	-3.49572	0.130617	-2.49634	1.93587	-0.0745674	-1.12502	880	-0.713863	-2.86818	-2.45949	1.01679	-2.36477	-2.75172
881	-2.92862	-3.05473	-0.606191	0.236863	-0.723993	-2.80697	-1.83785	-1.77369	-1.95751	881	-13.2859	-3.82362	-0.193471	-3.04454	0.681254	-1.89666	1.87793	-0.132676	-1.25573	881	-0.744287	-2.98125	-2.52553	1.42343	-3.10567	-3.44555
882	-2.75607	-3.85898	-1.05606	0.536335	-0.585547	-2.71757	-1.92194	-1.78954	-2.49259	882	-12.7609	-3.21195	0.288879	-3.63788	0.628664	-2.18488	1.84218	-0.211894	-1.28501	882	-0.853418	-3.01416	-2.51452	1.71	-3.06095	-3.4093
883	-2.03179	-3.54926	-1.55566	0.78116	-0.361563	-2.57724	-1.32799	-1.37202	-2.19428	883	-13.2982	-3.6358	0.0969246	-3.38985	0.387198	-2.4966	2.02959	-0.187071	-1.23535	883	-0.781326	-3.17446	-2.64076	1.38489	-2.41446	-2.94314
884	-2.90349	-3.39956	-0.989054	0.676638	-0.381141	-3.14036	-1.70086	-1.73552	-2.20014	884	-13.5056	-3.45211	0.372559	-3.87815	1.03664	-1.57138	1.90303	-0.107977	-1.25056	884	-0.982391	-3.19402	-2.51128	2.00251	-3.0771	-3.55048
885	-2.23617	-2.9773	-0.988632	0.767065	-0.709076	-3.01475	-1.77132	-1.50474	-2.22651	885	-13.0045	-3.62706	0.291972	-3.29417	0.23518	-2.41571	2.09694	-0.0789289	-1.29767	885	-0.876567	-3.44257	-2.6071	1.78659	-2.36291	-2.75999
886	-2.31547	-2.82141	-1.09188	0.660157	-0.424959	-3.16141	-1.35548	-1.81068	-2.00146	886	-13.3592	-3.40505	0.551754	-3.32078	0.184345	-2.13754	2.08796	-0.207832	-1.21251	886	-0.824317	-2.90587	-2.56243	1.99856	-2.37285	-2.71547
887	-2.24846	-2.70186	-0.750318	0.570597	-1.02163	-2.59988	-1.32684	-1.62688	-2.13919	887	-13.197	-3.73103	0.272295	-3.44062	0.401597	-2.96073	2.15231	-0.269866	-1.33286	887	-0.576291	-3.28991	-2.49575	1.85132	-2.28404	-2.56983
888	-2.85547	-2.85527	-1.24486	0.892188	-0.6275	-2.40183	-1.55624	-1.64098	-2.31735	888	-12.982	-3.59015	0.373277	-3.66721	0.777984	-2.24272	1.8629	-0.29945	-1.50477	888	-0.612007	-3.24459	-2.61422	2.61568	-3.12554	-3.57846
889	-2.18145	-2.74398	-1.2594	1.18797	-0.810697	-2.56706	-1.35294	-1.66212	-2.23413	889	-13.1603	-3.44953	-0.0556748	-3.82036	1.11114	-2.3314	2.17675	-0.244307	-1.39714	889	-0.788601	-2.67115	-2.45237	2.42249	-2.44799	-2.83312
890	-2.51985	-2.51541	-1.76805	0.846216	-0.609787	-2.87397	-1.58073	-0.913399	-2.4838	890	-13.389	-3.09873	0.115428	-3.35408	-0.0786058	-2.34398	2.12987	-0.294814	-1.64493	890	-1.30582	-2.94213	-1.85096	2.6389	-2.57282	-2.82294
891	-2.57402	-3.0058	-0.652548	0.203684	-0.706979	-2.26083	-1.57449	-1.52177	-1.89539	891	-13.2365	-2.98207	0.136252	-4.00461	0.365226	-2.02522	2.05147	-0.348499	-1.29937	891	-0.737012	-3.1382	-2.48474	2.44917	-2.44799	-2.8859
892	-2.93309	-3.67728	-0.0686666	-0.266233	-1.01953	-1.9684	-1.62185	-1.318	-2.12571	892	-12.9202	-3.76952	0.331989	-3.31212	0.0128258	-2.48947	1.99684	-0.259236	-1.31034	892	-0.670872	-3.00939	-2.41936	2.14036	-3.11312	-3.55811
893	-2.82084	-2.95087	-0.764646	0.0809464	-0.545692	-2.46996	-1.21479	-1.74609	-2.27985	893	-13.053	-3.17903	0.184292	-3.6658	0.496051	-2.00729	2.02793	-0.338729	-1.3034	893	-0.851434	-3.03945	-2.5074	2.65224	-3.24229	-3.68403
894	-3.20337	-3.46047	-0.609352	0.017192	-0.588111	-2.23933	-1.41509	-1.2446	-1.95634	894	-13.482	-3.17697	0.417907	-3.58486	1.06941	-2.29914	2.05436	-0.281181	-1.56125	894	-0.889795	-2.98268	-2.55077	3.01985	-3.23857	-3.7896
895	-3.41892	-3.22033	-0.317095	0.0371424	-0.791118	-2.3276	-1.76208	-1.62806	-2.05714	895	-13.5088	-3.74134	0.204287	-3.64865	0.508207	-2.66064	2.00881	-0.247285	-1.44344	895	-0.761484	-3.01941	-2.51128	2.77824	-3.23112	-3.69802
896	-2.62763	-3.07063	-0.698483	-0.0211907	-0.70325	-2.83685	-1.57033	-1.6122	-2.5049	896	-13.4208	-3.11772	0.365116	-3.75129	0.646248	-2.79766	2.18158	-0.220979	-1.70003	896	-1.45132	-2.93974	-2.53718	2.46103	-2.57034	-2.96413
897	-2.43051	-3.01199	-0.483557	-6.44542	-0.917211	-2.54737	-8.14814	-0.893433	-2.55002	897	-13.9142	-3.41973	-1.09487	-3.40354	0.735795	-5.19457	2.068	-0.164341	-8.17564	897	-0.953951	-3.01178	-1.94094	1.92345	-2.57965	-3.09068
898	-2.54945	-2.57611	-0.681415	-14.6264	-0.508633	-2.10805	-21.1231	-0.653257	-3.92962	898	-13.7367	-3.64025	-5.58557	-3.8085	1.03593	-8.59413	1.99962	-0.12323	-18.564	898	-2.18151	-3.1215	-1.82442	3.04505	-2.60325	-3.16636
899	-3.22179	-3.55153	-0.698904	-12.8386	0.102021	-2.59105	-19.15	-0.620372	-2.82606	899	-13.4227	-3.58386	-3.09398	-3.5506	0.400752	-8.88769	1.83138	-0.118557	-15.7118	899	-1.2701	-2.9073	-1.84319	2.37852	-3.22242	-3.80677
900	-2.64997	-4.25646	-0.292653	-11.4846	-0.594404	-2.78298	-19.6011	-1.31037	-2.57991	900	-13.7783	-3.71773	-1.46263	-3.85238	0.686975	-7.50421	2.16677	-0.425512	-12.5452	900	-1.54061	-3.32664	-2.44978	1.95705	-2.61815	-3.07606

## Sheet: Fig 5B
Source Data	Figure 5B	ASH cyto-pH data: individual dF/F(%) traces
		Three trials per animal: Read from left to right; Trial 1 signifies a new animal
		Acquisition Rate: 5 Frames/sec
		Pulse 1		Pulse 2		Pulse 3
		Stimulus On:	Frame 150	Stimulus On:	Frame 300	Stimulus On:	Frame 450
		Stimulus OFF:	Frame 200	Stimulus OFF:	Frame 350	Stimulus OFF:	Frame 500
	ASH VGLUT-pH Control										ASH cyto-pH
Frame / Trial #	1	2	3	1	2	3	1	2	3	Frame / Trial #	1	2	3	1	2	3	1	2	3	1	2	3	1	2	3	1	2	3	1	2	3	1	2	3	1	2	3
1	-2.62456	-1.52565	-1.86291	-4.03699	-2.20487	0.383377	0.607743	-0.689735	-2.044	1	-1.1239	-1.85308	-0.9013	0.651736	-1.46445	-0.61998	0.062101	-0.492677	-2.28411	-0.1885	-2.24012	-1.77414	0.86132	-0.568707	-2.01382	0.285132	-3.56957	-1.6038	0.955803	-1.73772	-1.78276	0.627203	-2.81458	-2.19344	-1.40769	-2.77221	-2.14404
2	0.668394	-0.135465	-0.503718	-1.30328	-1.61408	0.133979	0.219257	0.370603	-0.603591	2	-1.1302	-2.0263	-1.34944	0.923639	-1.4655	-0.94446	-0.57094	-0.456224	-2.38693	-0.269611	-2.27384	-1.49411	0.648732	-0.296701	-1.66672	0.32597	-3.77365	-1.88992	1.207	-1.21045	-1.98736	-0.168915	-2.28917	-2.16808	-0.924021	-2.9464	-2.34262
3	2.03404	-0.509802	0.989121	-2.97167	0.487223	-1.41588	-0.597022	-1.27439	1.30509	3	-1.27174	-1.32137	-1.31647	-0.0129635	-1.70284	-0.607761	-0.419763	-0.179378	-2.40744	-0.811199	-2.40753	-1.69825	0.742539	-0.644412	-1.89859	0.150153	-3.81835	-1.96086	0.845732	-0.990437	-1.39297	-0.0161405	-2.52051	-2.20869	-0.68647	-2.92306	-2.17161
4	-1.05508	-1.47813	-0.34172	-1.15754	0.109168	0.945964	-1.47175	-0.207305	0.194243	4	-1.58267	-1.56381	-1.56694	0.774175	-1.75775	-0.889126	0.221286	-0.487771	-2.22661	0.184736	-1.74381	-1.51181	1.1568	-0.617177	-1.57719	0.653264	-3.3333	-1.28069	0.429199	-1.00687	-1.25019	0.0521765	-2.575	-2.25415	-0.918103	-2.51963	-1.65959
5	0.165796	0.777767	-0.260861	-2.80243	0.217709	-0.456451	0.077087	1.07686	0.718741	5	-2.00121	-1.48937	-1.36676	0.298037	-2.15373	-0.552462	0.23493	-0.876193	-2.79836	-0.295036	-1.99563	-1.17851	0.82248	-0.387862	-1.47155	0.902536	-3.67213	-1.70371	1.00126	-0.695348	-1.00418	0.629463	-2.08179	-1.86864	-0.492433	-2.12737	-2.03337
6	2.30837	-1.12714	0.577662	-2.24021	-0.107137	-0.742251	1.59362	-0.680326	0.487685	6	-1.3195	-1.23906	-1.56698	0.275848	-2.31023	-0.327308	0.152498	-0.760854	-2.38172	0.36841	-1.33417	-1.84823	0.901242	-0.438681	-1.30718	1.0259	-3.61001	-1.5347	0.305137	-0.950814	-1.30023	0.369346	-2.06685	-2.27752	-0.461959	-2.71011	-1.60381
7	-0.659475	-0.130757	1.42004	-1.7577	-0.0195912	0.166588	2.55835	0.322415	0.496839	7	-1.3614	-1.06338	-2.0834	0.318882	-1.74706	-0.465364	-0.362772	-1.11535	-2.29657	0.894005	-1.32551	-1.09118	0.971351	-0.337338	-1.23602	0.727899	-4.07317	-1.7358	1.27426	-1.19766	-1.02212	0.506824	-1.57889	-2.11582	-0.330324	-2.43927	-1.80718
8	-0.341098	2.4107	2.56552	-2.25061	-1.04392	0.781905	-1.28587	-0.246465	1.26946	8	-1.25544	-1.38214	-1.78481	0.92535	-1.68786	-0.189182	-0.317292	-0.576576	-2.65307	-1.19181	-2.24736	-1.61805	1.04289	-0.0345297	-1.64527	0.899995	-3.36038	-1.70424	0.999358	-0.654144	-1.57467	0.793183	-2.01128	-1.83284	-0.170425	-2.17515	-2.00798
9	1.34365	-1.43391	0.18552	-2.07834	-2.04073	-0.34072	-0.170424	-0.400563	-0.288095	9	-1.13441	-1.25787	-1.48961	1.13869	-1.38987	-0.989241	0.0458011	-0.464526	-2.60208	-0.814599	-1.82202	-1.78443	1.15596	-0.524307	-1.70785	0.695196	-4.07824	-1.54271	1.45182	-1.51967	-1.17801	0.74361	-2.52036	-1.61767	-0.245225	-2.09999	-2.2697
10	2.24438	-0.996171	0.840377	-0.052253	1.24283	-1.23733	0.852968	-0.0849019	-0.964173	10	-1.37234	-1.19585	-1.17416	0.710506	-1.804	-0.610765	0.274638	-0.481265	-2.17671	-0.973852	-1.68065	-1.0344	1.56954	-0.174298	-1.69884	1.30103	-4.00625	-1.29141	2.11476	-1.06072	-1.85765	0.638745	-1.64203	-2.22658	-0.0416189	-2.21378	-2.18628
11	0.944451	-1.95974	-0.959146	-1.10261	-0.506206	0.584255	1.639	-0.394221	-0.0796757	11	-1.42596	-0.99758	-1.51113	0.68209	-1.01012	-0.679123	0.110547	-0.227494	-2.45074	-0.675072	-1.66431	-0.840534	1.0744	0.288565	-1.64247	-0.467936	-3.74585	-1.09672	-0.460901	-1.08583	-1.23807	0.452719	-2.02056	-2.03985	0.222212	-2.30085	-1.90583
12	-0.951107	-0.339323	1.00193	-0.344286	-0.575975	2.70937	-0.350344	-0.305419	-0.663957	12	-1.4495	-0.934977	-1.86391	0.778269	-1.12703	-1.07923	0.888548	-0.247727	-1.9996	-0.908638	-1.46151	-1.05988	0.833297	-0.039518	-1.481	0.169183	-3.62813	-1.6631	-0.518028	-0.913826	-1.39044	0.84252	-2.35786	-1.89708	0.396105	-2.01054	-1.97338
13	-0.315517	-0.107719	1.49129	-1.1702	-0.928236	1.27601	1.15445	-1.5889	-0.462342	13	-1.56538	-1.06553	-1.25968	0.700107	-1.15731	-0.5832	0.0550769	-0.524859	-2.43069	-1.09183	-2.18421	-0.642456	1.18822	-1.1097	-1.40328	-0.358581	-3.28242	-2.11057	0.269996	-1.23498	-1.57396	0.756062	-2.10002	-1.89077	-1.64853	-1.79729	-2.13489
14	-0.227028	-0.176352	3.10268	-1.53738	-1.57342	0.0418359	1.99425	1.00396	1.13069	14	-1.34644	-1.24641	-1.4107	0.510834	-1.62233	-0.283165	0.37027	-0.234608	-2.27296	-0.632601	-1.10981	-0.730887	0.995442	-0.868756	-1.30617	0.204445	-3.74322	-1.57417	0.15416	0.00742153	-0.831922	0.702138	-2.06096	-1.66478	-1.36758	-2.11757	-1.82207
15	-1.17579	1.69093	-2.34095	-1.21711	0.825261	0.68648	-0.248017	0.537566	0.207687	15	-1.52433	-1.31534	-1.36058	1.24684	-1.32983	-0.638817	0.401299	-0.0537346	-1.92329	-0.58381	-1.09022	-0.630769	1.05051	-1.90476	-1.04258	0.474326	-3.63535	-1.4975	0.002022	-2.06812	-1.01582	0.590902	-2.23259	-1.93311	-1.11552	-2.2009	-1.67397
16	2.45102	0.8519	0.259107	-0.701895	1.4304	0.696252	0.921537	-0.838069	1.20374	16	-0.958595	-1.19844	-1.19243	0.825585	-0.978978	-0.715354	-0.541155	-0.191139	-2.20314	-0.0438978	-1.79032	-0.339596	1.17042	-1.11871	-1.16673	0.5025	-3.10569	-0.785044	0.418369	-2.30542	-0.898088	-0.138882	-2.20691	-1.98297	-1.26939	-1.86819	-1.76889
17	2.90687	1.50564	-2.1747	-0.902316	0.545397	-1.06464	0.277793	1.48449	1.15848	17	-0.569864	-1.22827	-1.09932	0.481793	-1.21481	-0.849405	0.11342	-0.143219	-1.949	-0.649168	-1.88852	-0.284823	1.00842	-0.783873	-1.09147	0.112426	-4.14423	-1.3145	0.555865	-1.98973	-1.43938	-0.974279	-1.9784	-1.66538	-1.40016	-1.90985	-1.53882
18	-0.498129	-1.4937	-1.67269	-0.363499	1.56565	-0.954436	1.45034	0.556503	2.60398	18	-1.0463	-1.08338	-0.766376	-0.230652	-1.82898	-0.328575	0.0606558	-0.342475	-2.14344	-0.66042	-1.54106	-0.352086	1.40302	-1.22768	-0.74191	1.01966	-4.12718	-1.09796	0.407538	-2.28611	-0.812984	0.00366447	-2.18187	-1.87168	-1.27884	-2.11832	-1.83051
19	0.934534	-0.244426	0.56603	-0.12132	0.927564	0.0670799	0.414663	-0.0735265	0.429109	19	-1.00771	-0.812712	-0.985044	1.07607	-1.78128	-0.932552	-0.0539729	-0.0458702	-2.06838	0.0605797	-1.32182	-2.07389	1.09761	-1.14007	-1.14807	0.68923	-3.66023	-1.23219	1.06546	-2.30269	-1.11171	-0.534705	-1.58638	-1.83423	-1.14263	-1.38681	-1.89674
20	1.88398	0.439029	0.796416	-0.95659	-0.278647	0.542911	0.950966	0.354561	-0.18806	20	-0.703317	-0.927775	-0.804871	0.859885	-1.21763	-0.957272	0.17294	-0.0547445	-2.05398	0.0294567	-1.4972	-2.08272	1.05557	-0.754698	-1.65467	1.04803	-3.89126	-0.923274	1.10413	-2.07904	-0.665484	-0.00365844	-1.48199	-2.03485	-1.23567	-1.30652	-1.39904
21	0.247316	-0.45627	1.67583	-0.412232	-2.08685	1.658	1.74355	-0.23643	0.735039	21	-0.868204	-0.825047	-1.09074	1.35623	-0.972452	-0.577024	0.00669809	-0.098115	-2.22166	-0.206503	-1.11267	-2.05057	0.810189	-0.736534	-1.31586	0.619429	-3.43164	-0.886403	1.30782	-1.38983	-0.953997	-0.438513	-1.82485	-1.86669	-1.27023	-1.70639	-1.58832
22	-3.09764	2.09781	-0.461122	0.249445	1.12408	-1.39151	1.81086	1.48591	1.87404	22	-1.34275	-0.875117	-1.31611	1.06415	-1.23258	-0.620582	0.342073	-0.408376	-1.88291	0.322492	-1.49444	-1.55475	1.14643	-0.456892	-1.57835	1.19187	-3.77632	-0.991915	1.47046	-2.25095	-0.8407	-0.142794	-1.84128	-1.47426	-0.900787	-1.65356	-1.89
23	-1.62322	0.979425	-0.239043	-0.561545	-2.02035	0.652723	0.503322	0.287769	0.0829941	23	-0.760989	-0.795139	-0.565082	1.01294	-1.70138	-1.06835	0.174705	-0.0767827	-2.55818	0.156438	-1.11946	-2.34831	-0.0526013	-0.527083	-1.41176	1.04315	-3.48725	-0.8484	1.41659	-1.79444	-1.13546	0.973718	-2.15116	-1.28393	-1.13574	-1.77499	-1.67067
24	-0.335692	-1.24355	1.61277	-0.853364	0.208199	0.283065	2.24221	0.43555	-0.0492487	24	-1.17616	-1.05335	-0.700194	1.38696	-1.32848	-0.719705	0.382445	-0.338579	-2.05604	0.293715	-1.51014	-2.60026	-0.495329	-0.49462	-1.73181	0.826778	-3.46045	-0.744833	1.14652	-2.08153	-0.781642	0.798691	-1.86488	-1.78798	-0.43669	-1.58203	-0.938267
25	-1.6312	-2.1587	-1.31148	-2.32397	-0.0325838	3.12086	2.23025	-0.751367	1.36525	25	-0.354855	-0.887252	-0.79321	1.22734	-1.76108	-0.222922	0.305314	-0.0773547	-2.01366	0.589287	-1.12955	-1.92342	-0.239722	0.117688	-1.23795	-0.58908	-3.30936	-1.0694	1.42268	-0.325517	-0.657565	-0.0385975	-1.71053	-1.45811	-0.553843	-1.44146	-1.41376
26	-1.44734	0.617737	1.50728	-0.580156	0.409156	-2.0974	0.689921	0.379267	0.980754	26	-0.812739	-0.84889	-1.31293	0.556447	-2.48045	-1.77818	0.123873	-0.556173	-1.92359	0.67533	-1.43326	-2.21971	-0.241934	-0.481406	-0.474895	-0.257238	-3.47687	-0.989079	-0.139053	-0.164342	-0.858112	-0.694031	-1.79063	-1.4338	-0.603974	-1.81064	-1.18933
27	-1.31053	0.945851	1.7157	1.28033	0.561951	1.14871	1.17228	0.979716	-0.565016	27	-0.768628	-1.07578	-1.01413	1.35341	-1.87523	-0.994779	0.217799	-0.179092	-1.87182	-1.66684	-1.18443	-1.79947	-0.409291	0.157245	-1.27015	-0.10969	-3.02372	-0.612885	-0.864093	-1.5122	-1.03423	-0.487917	-1.35504	-1.55354	-0.652144	-2.03688	-1.01845
28	-1.18001	-1.0789	2.52558	-2.89968	-0.440164	0.523641	-1.56833	-0.257434	0.158979	28	-0.782985	-0.973782	-0.781594	1.07535	-2.0571	-0.993822	0.41591	-0.067971	-2.1071	-1.16811	-0.974054	-1.54161	0.282505	-0.356466	-1.40795	-0.502609	-3.77965	-3.14707	-0.570879	-1.95174	-0.662574	0.210894	-1.81601	-1.2899	-0.47709	-1.61416	-1.07561
29	-0.246877	0.20234	0.0683922	-1.07856	2.32807	2.02022	-1.94335	1.69985	0.745227	29	-0.923535	-0.991134	-0.629512	1.69816	-2.45377	-0.568128	0.257313	0.129221	-2.05086	-1.1446	-1.14412	-1.06951	-0.297392	-0.0982462	-1.03057	0.0368494	-3.21602	-2.86834	-0.275899	-1.90383	-0.575323	-0.0912501	-1.70215	-1.33142	-0.337315	-1.58989	-1.83986
30	0.449033	-0.824087	1.16371	-4.13437	-1.18039	-0.665509	-0.483609	-0.238733	0.470497	30	-0.732216	-0.715857	-1.10749	1.40011	-2.33017	-0.051569	0.57296	-0.305763	-1.76838	-0.490393	-0.89003	-1.56418	-0.358061	0.583814	-0.940942	-0.202203	-2.92286	-2.11872	0.33047	-1.74548	-0.948368	0.162225	-2.01046	-1.61959	-0.631832	-1.48323	-1.68937
31	1.57771	0.422841	-0.394409	-3.5196	0.871127	0.154604	0.362144	0.0751552	-0.695995	31	-1.03423	-0.759939	-1.1389	1.35874	-1.27354	-0.913688	0.43242	-0.342922	-2.00322	-0.938133	-0.724246	-1.7274	-0.143556	0.178651	-1.01269	-0.265563	-3.05786	-2.94797	0.618013	-2.0078	-2.42266	0.467322	-1.58523	-1.73019	0.291768	-0.984156	-1.31316
32	1.86495	1.17098	0.555036	-1.23228	-1.45246	-0.342056	-0.127035	0.596787	0.676289	32	-1.14393	-0.724342	-0.437992	1.30295	-1.79024	-0.884652	0.237838	-0.144908	-1.64162	-0.951396	-1.58206	-0.827393	-0.473352	0.0155935	-0.929853	0.209479	-3.23521	-2.3665	0.368911	-1.77758	-0.5436	0.131981	-1.96644	-1.6537	-0.125925	-1.18776	-1.6179
33	-2.90209	1.21978	-2.09947	-3.57156	-1.03543	-0.328478	-0.167459	1.27863	-1.09683	33	-0.870285	-0.361175	-1.53186	1.72654	-1.80532	-0.58537	0.493292	0.199714	-2.11786	-0.864012	-0.974201	-1.56323	0.192337	-0.339549	-0.670745	0.217747	-2.89844	-2.45363	0.643578	-1.58023	-0.443231	-0.275191	-1.84419	-1.27007	0.159447	-0.932215	-1.28554
34	0.638621	-1.03915	1.31533	-2.57792	1.84058	1.37942	0.381532	-0.820205	1.01561	34	-1.21592	-0.53076	-0.982215	1.60159	-2.06289	-0.734661	0.211119	-0.411218	-2.04409	-0.312322	-1.05074	-1.54301	0.152268	-1.32266	-0.972619	0.506515	-3.02088	-1.70236	1.69056	-1.24614	-0.417566	0.311655	-2.05764	-1.62924	0.0984486	-1.42242	-1.10919
35	2.15653	0.429327	-0.141815	-2.80196	1.20027	-0.20844	-1.16498	-0.873485	1.14095	35	-1.29507	-1.01622	-0.707417	1.61431	-1.57832	-0.445507	0.627699	-0.446759	-1.79642	-0.550676	-0.640271	-1.65667	-0.161108	-0.962659	-0.487479	0.408654	-3.17793	-2.41777	-0.052084	-1.58224	-0.201993	-0.292778	-1.64497	-1.48471	0.293216	-1.5525	-1.1148
36	-2.89525	-0.680769	1.83298	0.0997359	-1.1604	-0.856878	1.9313	-0.958538	0.656417	36	-0.740628	-0.734942	-0.945373	0.582848	-2.08411	-0.73576	0.60293	-0.485027	-1.91877	-0.70811	-1.00639	-1.0203	0.120753	-0.878792	-0.778023	0.280631	-2.7304	-1.62828	-0.46685	-1.01161	-2.3189	0.0116021	-1.65739	-1.1267	-0.261292	-1.22486	-0.573635
37	-0.514222	-0.726707	1.39931	-1.87675	-0.455114	-0.444918	0.014356	-0.456933	-0.70278	37	-0.17625	-1.25629	-0.757249	0.0381654	-2.663	-0.197767	0.107976	0.0674759	-1.4713	-0.0970941	-1.01279	-1.29472	0.218542	-0.861243	-0.858253	0.857825	-3.42868	-2.13091	-0.162434	-1.37958	-2.24448	-0.0342941	-1.61613	-0.880386	0.182062	-0.874227	-1.00472
38	1.04642	-1.47566	-0.118719	0.144092	-1.17695	2.85716	1.21144	0.731686	1.21983	38	-1.11793	-1.34672	-0.793219	-0.303212	-1.37179	-0.390129	0.419943	-0.270275	-1.85072	0.0918942	-0.503332	-1.71736	0.410579	-0.902939	-1.35921	0.524917	-2.48089	-2.02023	0.412791	-1.42107	-1.92973	0.202323	-1.97606	-1.03814	0.358684	-1.5945	-1.13095
39	0.301897	-1.23726	1.07826	-1.07393	-0.144606	0.92678	0.144524	0.801406	0.343564	39	-1.02941	-0.663625	-0.955228	1.02555	-1.78935	-0.658709	0.0967677	-0.139618	-1.62356	0.0789662	-1.25477	-0.992616	0.335013	-0.473389	-0.36183	0.695929	-3.52884	-2.02045	0.574877	-0.937973	-2.27396	0.0893275	-1.75399	-1.42707	0.590448	-1.1405	-0.96949
40	-0.165175	0.437651	0.778377	-0.988709	0.515977	-1.33708	-1.57548	1.15534	-0.751777	40	-0.630278	-0.50907	-0.456103	0.307061	-1.5048	-0.375288	0.605737	0.0212009	-2.28944	0.317272	-1.07033	-1.29643	0.279162	-0.299937	-0.703965	0.565365	-2.64036	-1.9346	0.768106	-0.932224	-1.92801	0.0669429	-1.88198	-1.42204	-1.53935	-0.954476	-0.688274
41	-0.00921597	1.28965	0.473883	-2.21968	-0.634514	0.179361	-0.125452	1.18911	-0.701042	41	-1.63629	-1.78296	-0.665455	-0.706712	-1.74618	-0.215923	0.798806	0.0372962	-2.44862	0.589431	-1.33343	-1.03119	0.974891	-0.564418	-1.25207	0.0782393	-2.60882	-1.31955	0.719578	-1.169	-1.81987	0.302222	-1.40789	-1.23494	-1.63992	-0.706496	-0.834664
42	-1.56755	-0.873354	3.51988	-4.30957	-0.130148	1.23908	-1.10425	0.50841	-0.853756	42	-0.542948	-0.487419	-0.820403	-0.224245	-1.46038	-1.05672	0.101355	-0.281446	-2.5527	0.802456	-1.04085	-1.10562	0.177932	-0.643476	-1.26572	0.620247	-2.25537	-1.43311	0.76606	-1.28289	-1.33448	0.025362	-1.89417	-1.71426	-1.23155	-0.503483	-0.706449
43	-0.0154897	0.94695	0.0038532	-2.48098	-0.654026	0.775027	0.429984	-0.407933	0.162098	43	-1.37826	-1.11052	-0.955578	-0.133137	-1.26088	-0.62192	0.585362	0.0290743	-2.44015	0.523259	-1.17946	-1.28971	0.712892	-0.614293	-1.30101	0.566735	-2.22888	-1.39344	1.03115	-0.786045	-1.32804	0.588057	-1.64702	-1.12576	-0.271467	-2.40321	-0.984346
44	1.69111	2.19894	3.38398	-3.699	0.155576	0.760514	-2.44239	-0.45298	0.562462	44	-1.29732	-0.910592	-0.336397	0.048799	-1.36253	-0.299894	0.529589	-0.225796	-2.25791	0.935327	-1.41755	-0.80753	0.910534	-0.335266	-1.32994	-1.09058	-2.56235	-1.68346	1.16451	-1.20915	-1.88227	0.36057	-1.60331	-0.696591	-0.805114	-2.60107	-0.614958
45	0.980461	0.971213	1.00128	-4.51278	0.585766	0.444664	1.41635	0.10985	0.61453	45	-1.13579	-1.12528	-0.724091	0.37373	-1.24175	-0.674055	0.663316	-0.0588107	-1.79731	0.561085	-1.49887	-0.393818	0.70242	-0.686924	-1.21524	-1.04798	-2.45388	-1.28922	1.38396	-0.943244	-1.95153	0.0852531	-1.77293	-1.7075	-1.03373	-2.54568	-0.513731
46	-1.3102	-1.07629	-0.266107	-4.61057	-0.495713	2.82354	0.370897	-0.405932	0.135607	46	-1.38334	-1.273	-0.644802	0.190638	-1.39062	-0.859816	0.664047	0.249734	-2.32535	0.937577	-0.979074	-0.537775	0.616923	-0.299399	-0.943015	-0.872834	-2.59012	-0.984375	1.39734	-0.990053	-1.77884	-0.200581	-1.7323	-1.60482	-1.11562	-2.78998	-0.738627
47	1.81994	-0.298451	-2.35119	-4.85661	1.94443	-2.20778	0.527303	-0.423603	-0.345038	47	-1.92022	-0.84928	-0.661637	0.551947	-1.30107	-0.2556	0.34703	-0.210049	-2.17684	0.577748	-1.66392	-0.780494	1.28836	-0.229523	-0.865678	-0.910447	-2.05297	-1.17074	-0.730083	-0.91464	-1.70767	-0.00244097	-1.65429	-1.24516	-0.97304	-2.90889	-0.888557
48	-0.649321	-2.24463	-1.33972	-0.926762	1.0071	-0.26787	0.706975	0.367587	2.24525	48	-0.725462	-0.856161	-0.843015	-0.33041	-0.931652	-0.0907236	0.746941	-0.510023	-2.25624	0.702958	-1.39462	-0.410722	0.732165	-0.291259	-0.762932	-0.183611	-2.36858	-1.42556	-0.316432	-0.501833	-2.01851	0.228776	-1.93088	-1.14259	-1.01238	-2.54872	-0.326292
49	-0.19776	0.00587582	0.692813	-0.924319	1.75357	3.36144	2.80408	1.42595	-0.227175	49	-1.2211	-1.15524	-0.187773	0.342548	-1.31645	-0.334831	0.432243	-0.467448	-1.95613	-1.22801	-1.30483	-0.0887513	1.0773	0.0639784	-0.617949	-0.56908	-2.42823	-0.821857	-0.344368	-1.05531	-0.920795	-0.136718	-1.77125	-1.64356	-1.03687	-2.78416	-0.715689
50	-0.324123	-1.92548	0.370363	-0.585435	0.881085	1.43219	-0.499879	-0.423386	-0.759343	50	-0.836667	-0.702759	-0.771425	-0.0720071	-1.02915	-0.729274	0.643621	-0.0746379	-1.96939	-1.33378	-1.1647	-0.708867	1.34535	-0.220644	-0.959649	-0.496862	-2.54137	-0.805207	0.18721	-1.04956	-1.26999	-0.209031	-1.77013	-1.16367	-0.571583	-2.35194	-0.568458
51	-1.57675	1.57935	-1.80127	-2.97661	2.26058	1.20175	1.97537	-0.31291	-0.732021	51	-0.925987	-0.903283	-0.554311	0.17173	-0.744408	-0.91942	0.87403	-0.114889	-1.96515	-1.41853	-1.05946	-0.726824	1.00695	0.0127196	-0.621999	-0.993084	-2.3283	-0.858244	0.15258	-1.32913	-1.3465	-0.0519053	-2.02399	-1.74372	-1.12102	-2.7563	-1.90198
52	0.665271	1.63654	-0.678262	-5.2814	1.56877	-0.123681	-1.41078	-0.561901	0.0719393	52	-0.828775	-1.42217	-0.688893	0.444782	-1.01782	-0.0951982	0.683245	-0.0792136	-1.77601	-0.62901	-0.881219	-0.792683	1.06707	-1.5897	-0.982118	-0.294793	-2.45778	-0.709133	-0.158158	-0.682604	-2.06898	0.226317	-1.68247	-0.901238	-0.541071	-2.15579	-0.666476
53	-0.0108116	2.60169	0.792415	-3.44261	0.579152	-0.255823	0.0155189	2.29807	-0.0540562	53	-0.868992	-1.2179	-0.596578	0.27802	-1.0218	0.00120414	0.44341	-0.164945	-2.04064	-0.890156	-0.888504	-0.118496	1.00744	-1.04894	-0.669202	0.122255	-2.29641	-0.0057054	-0.436451	-1.08166	-0.308706	0.0918769	-1.49205	-3.19428	-0.400405	-2.92373	-0.598821
54	0.710477	-1.22559	2.57048	-1.7583	3.35823	0.227096	-0.0358163	-0.159317	-1.53508	54	-0.865588	-0.624072	-0.442843	0.151963	-1.48267	-0.14658	1.26547	-0.549292	-1.99579	-1.26411	-1.05498	-0.115586	0.701634	-1.32059	-1.02136	-0.358391	-2.24553	-0.229149	0.186791	-1.1715	-2.24878	0.0508987	-1.4121	-1.46945	-0.464068	-2.12781	-2.30648
55	0.888218	-3.93822	2.3839	-1.11632	2.14773	1.58095	-1.26301	-1.73183	0.415101	55	-1.1526	-1.17483	-0.707417	0.709959	-1.0126	-0.85605	1.27646	-0.0176208	-2.06492	-1.05563	-0.904304	-0.199151	0.550305	-1.00784	-0.322776	-0.824755	-1.98713	0.0857224	0.93972	-1.33315	-1.9065	0.129504	-1.23958	-1.54659	-0.420149	-2.64722	-0.399404
56	-3.20203	-0.197305	-0.615291	-0.700394	0.190995	-1.80208	-0.412336	-0.540468	-1.40261	56	-0.728545	-0.981626	-0.105771	0.0153981	-0.92279	-0.849768	0.926021	-0.186894	-2.16447	-0.857692	-1.50537	-0.371498	1.36978	-1.59705	-0.8894	-0.353377	-1.73627	-0.450609	0.894911	-0.926666	-1.64523	0.239402	-1.44501	-1.09957	-0.394525	-2.58459	-0.282161
57	-4.27645	0.0119037	-0.289897	-1.33717	1.38274	-1.63533	0.205349	-0.888273	0.0329922	57	-1.32536	-1.30922	-0.602444	0.482457	-1.04272	-0.617764	0.437125	-0.315334	-2.1007	-0.905095	-1.03337	-0.46364	1.1718	-1.25473	-0.653821	-0.109699	-1.76971	0.249528	-0.100519	-0.814026	-1.14639	0.523338	-1.43946	-1.67643	-0.543949	-2.51511	-0.243965
58	1.11716	1.43815	0.00865428	-0.914259	1.3019	-0.487366	0.170805	0.1852	-0.172934	58	-1.25806	-0.872909	-0.19982	0.129329	-1.0704	0.0440447	0.759645	-0.380234	-2.12818	-0.79468	-0.925913	-0.177432	1.02194	-0.704532	-0.346353	-0.362235	-1.70579	0.148778	0.308669	-0.921971	-0.988248	0.513815	-1.46499	-1.13391	-0.660534	-2.57398	-0.484864
59	1.04428	-1.06485	0.527902	-0.605257	-0.575405	-1.01964	-0.550672	0.796619	-0.0390614	59	-0.530836	-0.882998	-0.334007	0.698896	-1.04655	-0.250452	0.834355	0.039164	-1.73576	-1.12588	-1.1199	-0.151751	1.46034	-1.44149	-0.348668	-0.213117	-1.5976	-0.355454	0.591703	-1.11371	-0.997216	0.12276	-0.996119	-0.893423	-0.097948	-2.16517	-0.393303
60	-2.84461	-0.596612	0.687898	-3.09545	0.0502547	2.48222	-0.437144	1.87734	-0.188839	60	-0.683097	-1.27083	-0.296357	0.39549	-0.855637	0.43723	0.934365	-0.518192	-1.80493	-1.13057	-0.994727	-0.293952	-0.575221	-1.02885	-0.40937	-0.380637	-1.18792	-0.0143787	0.722134	-0.889487	-1.18426	0.621652	-1.37025	-0.797505	0.032182	-2.32163	-0.571266
61	-1.05318	-1.01626	1.15905	-2.2522	-1.03976	-2.85634	0.341035	0.262869	0.128227	61	-0.651241	-0.788815	-0.743315	0.249424	-0.679009	-0.234042	0.486848	-0.216341	-1.79357	-1.18755	-1.4842	-0.449094	-0.257913	-0.853145	-0.787811	0.0665169	-1.5544	0.366482	1.16725	-1.81644	-1.08971	0.0980426	-1.72951	-1.21484	-0.0717435	-3.05729	-0.148749
62	-0.466514	-1.96813	-1.82629	-2.30039	0.634693	0.269792	0.536025	-0.248824	0.351894	62	-0.525144	-0.825108	-0.366914	-0.0143073	-0.45157	-1.10549	0.835204	0.0680479	-1.76739	-0.919411	-1.54942	-0.170009	-0.254717	-0.491553	-0.173213	0.18141	-1.66029	0.325322	-0.352503	-1.25774	-0.524852	0.134838	-1.72119	-1.03653	-0.10057	-2.74747	-0.187505
63	-1.06218	-0.229316	-1.87153	-1.68212	0.680864	1.85053	-0.295648	-1.6096	-0.548754	63	-1.00711	-1.18449	-0.165197	0.2444	-0.847776	0.118836	0.632094	-0.414623	-1.992	-1.01168	-1.15101	-0.238727	-0.0833783	-0.624885	-0.772816	0.344895	-1.66496	0.190663	-0.663054	-1.7839	-0.770194	0.307671	-1.52634	-1.15848	0.257636	-2.32178	-0.129173
64	2.14785	-1.27701	-1.42374	-2.98125	-0.352343	-0.394513	1.87668	-0.158843	0.00924843	64	-1.03779	-1.10392	-0.350878	0.367503	-0.775409	-0.652303	0.432966	-0.583297	-1.75752	-1.08321	-1.10174	0.0169838	-0.492133	-0.273543	-0.51636	0.286159	-0.957818	0.364217	0.719159	-1.02172	-0.439272	0.314831	-1.23991	-0.609691	0.0692541	-2.2931	-2.08781
65	-0.251139	0.316851	-0.171964	-1.54303	-0.112489	-0.100758	-1.04913	0.441399	-0.632336	65	-1.21907	-0.528614	-0.842637	-0.00451753	-0.483797	-0.498821	1.05532	-0.17684	-1.44783	-1.08355	-0.534983	-0.541236	0.0654431	-0.381352	-0.380441	0.184987	-1.27688	0.538176	0.647901	-1.37598	-0.184819	-0.371558	-1.2477	-1.17366	0.184834	-2.85031	-1.52615
66	-2.03878	-2.13916	-3.39628	-2.50094	-0.189005	-0.18009	-0.239755	0.618245	0.502121	66	-1.69081	-0.757778	-0.450039	0.0276568	-0.517885	-0.19658	0.346358	-0.26813	-1.36991	-1.61154	-0.415321	-0.417895	0.228768	-0.530776	-0.113281	0.185472	-1.43109	0.418299	0.866324	-1.16632	-0.00898264	0.282616	-1.53502	-1.1388	-0.186281	-1.77317	-0.419368
67	-4.43061	-0.749459	2.02367	0.141295	0.813769	-1.44828	1.43425	-0.179591	-1.24862	67	-0.606602	-0.743542	-0.419782	0.50067	-0.201395	-0.492893	0.624977	-0.567291	-1.54296	-1.09983	-0.906569	0.538437	-0.432005	-0.364704	-0.0947186	0.416609	-1.03455	0.337442	0.0055547	-0.870945	-0.959483	-0.0338361	-1.50133	-1.40821	-0.233396	-1.62703	-0.0120001
68	-0.835679	1.5375	2.67147	-1.602	-0.375421	-1.35225	0.0709989	0.552417	0.598191	68	-0.485841	-0.407426	-0.480457	0.603381	-0.4373	-0.20109	0.808301	0.0112006	-1.06139	-1.29796	-0.214293	-0.537524	0.0566918	-0.0718899	-0.152095	0.178622	-0.860366	0.298518	-0.105725	-0.936536	-0.694869	0.244302	-1.29179	-0.989528	0.222299	-2.13817	-1.79493
69	-0.747605	0.653803	-0.534708	-1.61515	0.0685498	-0.552829	-0.0895233	1.41329	-0.676638	69	-0.607628	-1.23013	-0.322463	0.137993	-0.450748	-0.601275	0.800336	-0.540087	-1.49708	-1.17237	-0.726067	0.128638	-0.602409	-0.429083	-0.683811	0.617459	-1.00096	0.474356	0.0055547	-0.845072	-0.485115	0.487983	-0.935591	-0.647937	0.470162	-1.95897	-1.89155
70	1.17612	-0.245493	-0.856743	-3.38738	0.472734	0.182077	2.62898	-1.01703	-0.777388	70	-0.689941	-0.384361	-0.266864	0.52114	-0.345308	-0.726385	0.615937	-0.581625	-1.14978	-1.13382	-0.549996	0.180201	-0.412437	-0.121252	-0.1749	0.397484	-0.931888	0.740353	0.559956	-1.13566	-0.232618	0.83257	-1.13164	-0.42537	0.275239	-1.85242	-1.93676
71	-0.908069	0.434578	1.77755	-2.55395	1.00139	0.7294	0.711324	-0.628535	0.8939	71	-0.936495	-0.668429	-0.754114	0.432758	-0.0640631	-0.213902	0.579043	-0.515439	-1.75402	-1.18444	-0.53006	-0.298516	0.122425	-0.368104	-0.315447	0.155539	-1.18257	0.527615	0.539364	-1.11295	-0.976084	0.156361	-0.663399	-0.766021	0.487091	-2.11015	-1.76814
72	0.255503	1.38246	2.62867	-0.979733	-0.375587	0.0851351	-0.477218	0.168547	-1.32235	72	-0.718543	-0.583831	-0.405399	-0.206752	-0.114044	-0.507407	0.63753	-0.302358	-1.63527	-0.811917	-0.576724	-0.0711957	0.031372	0.467143	-0.310867	0.653321	-0.627687	-1.05319	0.495763	-0.566178	-0.401824	0.556999	-1.02541	-1.09995	-1.43329	-1.63423	-1.70389
73	-0.12522	-0.661709	-1.01325	-1.60718	1.44818	-1.81562	1.19759	-1.14461	1.30314	73	-0.828344	-0.691555	-0.263513	0.156034	-0.840536	-0.468403	0.350366	0.193861	-1.22921	-0.94589	-0.144249	-0.0469187	0.119524	-1.65065	-0.265738	0.0848712	-2.71633	-1.09244	0.455695	-0.855182	-0.2008	0.179788	-1.07584	-0.876479	-1.31266	-1.77169	-1.76462
74	-1.01028	0.700559	-0.0759051	-2.43837	-1.82756	0.955044	0.388754	1.53333	0.863687	74	-0.276747	-0.633313	-0.35343	0.622843	-0.743687	-0.858708	0.891338	-0.214526	-1.39825	-0.857931	-0.525581	-0.499002	-0.300047	-1.07406	-1.7782	-0.109148	-0.574921	-1.42033	0.771174	0.0971603	-0.0978073	0.32803	-1.17834	-1.75206	-1.18516	-1.62317	-1.30215
75	-2.39213	1.7141	0.588662	-1.7067	0.572162	0.971058	-0.62992	0.174082	0.899661	75	-0.625321	-0.594172	-0.0564607	0.186489	-0.0694484	-0.458479	0.588832	-0.436491	-1.3186	-0.985057	-0.238757	-0.0905069	-0.396557	-1.23866	-1.0379	0.459702	-0.789699	-0.922239	0.482608	-0.523632	0.0245532	0.0998146	-1.3032	-2.75707	-1.64222	-1.43648	-1.66847
76	1.53512	-0.528529	1.5688	-2.97269	1.33865	3.03836	0.589811	0.296958	0.609304	76	-0.149729	-0.843246	-0.757824	-0.23373	-0.826468	0.084422	0.683598	-0.441639	-1.38676	-1.00976	-0.480197	-0.697732	-0.522222	-0.64685	-1.59474	0.151856	-2.56421	-1.14261	0.941208	0.0866676	0.276716	-0.0902556	-1.47345	-2.21699	-1.25098	-1.81487	-1.78724
77	-0.307097	-1.99877	0.60703	-1.66881	-1.34782	-0.732889	1.35073	0.421323	-0.699782	77	-0.683513	-0.610172	-0.0160527	-0.366483	-0.130557	-0.597678	0.817543	-0.575656	-1.28028	-1.00062	-0.39194	0.312922	0.163772	-0.751994	-1.84073	-0.0861024	-2.26785	-0.566469	0.427201	-0.799508	0.103169	0.194988	-0.965892	-2.15234	-0.986093	-1.70646	-1.24404
78	-0.668595	-0.741102	-1.15601	-1.0047	-0.481557	0.524368	0.692834	0.832815	1.08993	78	-0.769059	-0.0110213	0.161229	0.871253	-0.532877	-0.463583	0.240182	-0.122513	-0.923479	-1.16433	-0.382489	0.162244	-0.220204	-0.56209	-0.0570144	0.342659	-2.28496	-0.362801	-0.213194	-0.458472	-0.0101752	-0.147808	-1.30562	-2.62899	-0.80062	-1.54964	-1.4923
79	-2.26402	-1.23364	-0.00927337	1.22095	0.376406	1.46992	0.254395	-1.17782	-1.35224	79	-0.324157	-0.623117	-0.350932	0.812178	-0.736835	-0.368607	1.05875	-0.18995	-1.46794	-1.46143	-0.383769	-0.02525	0.697405	-0.671847	0.303779	0.219355	-2.29205	-1.0844	-0.278223	-0.275929	-0.421526	0.136031	-1.47174	-2.24243	-1.22319	-1.64733	-1.52956
80	-0.743157	0.125412	-0.664142	-0.821818	0.885924	2.03819	-1.37736	-0.846326	-0.559919	80	-0.448976	-0.704431	-0.153294	0.705935	-1.80861	-0.570653	0.564357	-0.325424	-0.990379	-1.37376	0.0383203	-0.0108544	0.404827	-0.615809	0.0714307	0.476648	-2.44746	-0.698388	0.133847	-1.63624	-0.330077	-0.50739	-0.823181	-2.10282	-0.969208	-1.27128	-1.56288
81	0.248512	-1.87064	1.79629	-1.63103	1.19682	1.51609	1.31694	-1.04806	-0.675792	81	-0.434968	-0.415376	-0.186084	0.509975	-0.0472632	-0.0894654	0.776491	-0.43373	-0.979155	-1.62389	-0.279957	0.125678	0.0398283	-0.237458	-0.137871	0.223266	-2.32183	-0.483647	0.0926171	-1.71117	-0.260191	-0.403905	-1.17047	-2.00506	-1.04642	-1.47511	-1.5015
82	-1.7028	1.45679	0.769069	1.34343	-0.905774	-0.519849	-0.048496	0.90407	0.527389	82	-0.698792	-0.32864	0.167292	0.682652	0.241292	-0.279009	-0.140144	-0.743704	-1.43805	-1.3298	-0.853506	-0.40385	0.102612	-0.181728	0.468289	0.104548	-1.84244	-0.474722	0.20901	-0.994126	-0.281515	-0.101496	-0.976179	-1.70517	-0.722468	-1.51184	-1.4747
83	1.33141	0.43782	1.79467	-0.406927	0.410572	-0.173377	-2.34709	-0.426439	0.674081	83	-0.957227	-0.652788	-0.354571	0.646501	-0.207339	-1.03912	-0.122953	-0.42725	-1.03799	-1.7649	0.0462944	0.480553	0.233488	-0.296609	-0.307926	0.297159	-2.36498	-0.232954	1.01233	-2.22972	-0.163352	-0.036277	-1.3351	-2.08948	-0.511502	-1.13464	-1.24545
84	0.292915	2.6504	-0.0567977	-1.90634	-0.274424	3.50152	0.127219	-0.414949	-2.42403	84	-0.433928	-0.541994	-0.641711	0.678996	-0.344012	-0.862102	-0.112821	-0.653844	-1.13909	-1.30175	0.359206	0.0205451	0.334718	-0.49139	-0.142837	0.443365	-2.23501	-0.552975	-0.415301	-1.33243	0.139472	-0.701426	-0.608535	-1.72741	-0.853073	-0.884949	-1.15191
85	2.25898	0.634181	2.09734	-0.735285	-0.780516	-1.45006	0.879033	1.05928	1.37153	85	0.0380156	-0.979999	-0.570912	0.202287	-1.34798	-0.628211	0.00179971	-0.903164	-1.13357	-1.82605	-0.259972	0.161993	0.13683	-0.65209	-0.197513	0.403136	-1.89328	-0.264249	0.143004	-1.48508	0.711012	-0.226799	-1.54151	-2.31577	-0.600078	-1.07179	-1.0738
86	-3.95645	-0.592531	-0.647273	-1.71959	-0.873271	-1.5263	-0.844012	-0.10143	0.176939	86	-0.411969	-0.129101	-0.340547	0.92335	-1.62492	-0.413937	0.27868	-0.442443	-1.0653	-1.86205	0.274493	0.374768	0.55178	-0.0696602	-0.514865	0.239803	-2.26645	-0.3816	-0.347761	-1.1118	0.770403	-0.0644597	-1.1603	-1.94029	-0.443494	-1.65404	-1.06398
87	-1.37724	0.104808	0.0932288	-1.75669	0.0278402	0.364142	-2.6992	-1.36424	-0.121114	87	-0.514458	-0.701674	-0.0590839	0.722538	-0.930224	0.0648049	-0.213594	-0.662173	-1.04762	-1.85918	-0.568799	0.610866	0.541553	-0.307286	-1.68239	0.157156	-1.55543	-0.203129	0.062961	-1.50688	0.082418	0.0483975	-2.11038	-1.7746	-0.270924	-0.926242	-0.545495
88	-0.925616	0.775323	-0.377675	0.35268	-1.33049	1.95144	0.470901	-0.240423	-1.97559	88	-0.638103	-0.663435	-0.206746	0.800825	-1.0384	0.0464105	-0.155688	-0.0986602	-1.09147	-1.65506	0.18914	0.225896	0.693177	0.577571	-0.21328	1.01991	-1.62188	-0.0253946	0.111024	-1.46994	0.328665	0.0957162	-1.55433	-2.0645	-0.627026	-1.09609	-1.10996
89	0.587768	1.19742	1.79144	-1.32173	-0.512326	-1.14059	0.564511	-0.399297	0.369396	89	-0.270862	-0.0763658	0.039268	0.562151	-1.22606	-0.0354252	0.184375	-0.104371	-0.889396	-1.67426	0.487728	0.0522958	0.281522	0.43609	0.124082	0.412118	-1.72535	-0.0687417	0.25884	-1.55517	-1.64985	-0.393436	-1.02918	-1.3581	-0.469961	-0.827555	-0.947392
90	-1.70596	-0.235555	-2.03456	-1.8581	-3.03338	-0.886988	-0.473928	1.38327	-0.478557	90	-0.099852	-0.363267	0.216648	0.0209219	-0.905781	-0.59898	0.274941	-0.211568	-0.87858	-2.09418	0.068248	0.680989	0.499911	0.14911	-0.272729	-0.0227711	-1.86714	-0.438335	0.372258	-1.77835	-0.868893	-0.167342	-1.06369	-2.04917	-0.345705	-1.02263	-0.894104
91	-1.06648	1.24621	0.341316	-2.82651	-0.11282	1.88249	1.05412	-2.03726	0.000398991	91	-0.213242	-0.241636	-0.512825	0.462737	-0.25888	-0.157018	-0.29848	-0.600455	-1.00904	-1.58961	-0.0990125	0.0849994	0.8684	-0.881358	-0.23165	0.496239	-1.6046	-0.536587	0.263442	-1.76335	-0.829871	-0.0223967	-1.0133	-1.74642	-0.21535	-0.697629	-0.617015
92	0.969349	0.545459	0.396858	-0.870414	-0.456611	1.52526	-1.84383	1.34428	0.522885	92	-0.589504	-0.620475	-0.204734	0.811662	-1.49648	-0.39681	0.162135	-0.413246	-0.906271	-1.42854	0.355072	0.757832	0.535457	-1.18294	0.401029	0.588134	-1.58275	0.625625	0.267439	-1.60447	-0.791326	-0.0196302	-0.510065	-1.32973	-0.704516	-0.876157	-0.81861
93	-1.10099	1.88208	-0.387399	-0.443706	-1.5519	3.23157	0.407803	0.568432	-1.18164	93	-1.07501	-0.327647	0.410935	1.25066	-0.795468	0.0817727	0.317287	-0.387767	-1.07815	-1.86272	-1.60071	0.763049	1.02376	-0.386647	-0.118537	0.860623	-1.65714	0.407777	0.56888	-0.852403	-0.988105	0.0878388	-0.486211	-1.4746	-0.102867	-0.721707	-0.652466
94	-0.118301	1.496	-0.814767	-0.204219	-0.824138	-1.78879	-0.49942	0.452127	0.214815	94	-0.583522	-0.281159	0.424707	1.48625	-1.5246	-0.24199	0.438352	-0.243008	-0.716147	-1.23031	0.247421	0.457831	1.07081	-0.648156	0.470459	1.03347	-1.13004	0.77432	0.625636	-0.521668	-1.11213	-0.161894	-0.607305	-1.23584	0.149553	-0.96479	-0.324891
95	-0.476821	-1.08373	-1.50844	-3.6976	-1.18128	0.480113	2.19454	-0.00226989	-0.603988	95	-0.284141	-0.16369	0.0791279	0.848485	-0.90308	-0.140848	0.484092	-0.148349	-0.786251	-1.34321	0.286258	0.436363	0.970663	0.0582991	0.382756	0.321212	-0.901826	0.485556	0.654037	-0.557889	-0.73017	0.0658459	-1.5673	-1.37376	0.12411	-0.472207	-0.310836
96	1.80097	1.79374	1.50033	0.283471	0.861942	2.56105	0.210335	-0.109052	1.22835	96	-0.19569	0.149224	0.0478113	0.525289	-1.38905	-0.12427	0.434982	-0.491792	-0.417087	-1.03552	0.121508	0.443385	0.548535	-0.204593	-1.81725	-0.0648461	-1.03863	0.751843	1.26398	-0.540018	-0.923418	-0.391984	-1.29455	-1.18674	-0.158634	-1.02923	-0.730686
97	-1.40514	1.52196	1.26717	-0.0947757	-1.92071	1.83168	1.44627	-0.722631	0.872651	97	-0.279616	-0.252809	0.0584029	0.480113	-0.969946	-0.0242344	0.414574	-0.479862	-0.551173	-1.27871	-1.70822	0.909262	0.954684	-0.159677	-2.12535	0.554689	-1.23464	0.486272	-0.398521	-0.868885	-1.62338	-0.076984	-1.49291	-1.4483	-0.307029	-0.201522	-0.692802
98	-0.911805	1.36676	0.467747	-1.61592	-0.828877	0.914737	-0.0989726	-0.739664	-0.163468	98	-0.18629	0.0396672	-0.360733	0.98948	-0.763272	0.462934	0.561021	-0.433318	-0.921642	-1.287	-1.82581	0.654755	-0.964212	0.21606	-1.51518	0.959511	-1.16526	1.13398	0.131012	-0.57509	0.183789	0.309473	-1.80013	-1.26259	-0.161118	-0.918822	-0.21797
99	-0.882844	-0.402781	1.14403	-1.84922	-1.45815	-2.21763	-0.587796	-0.914681	-0.689305	99	0.00641148	-0.213111	-0.171585	0.90788	-0.44395	-0.490439	0.42248	-0.655051	-0.991885	-1.42394	-1.3384	-1.01203	-0.875617	-0.0882424	-1.53076	0.182104	-0.633097	0.879523	-0.21919	-0.644226	-1.32699	-0.267114	-1.81214	-1.2952	-0.175937	-0.69366	-0.248168
100	0.289774	-0.341633	-0.457881	-0.908335	-0.729864	-2.55315	-0.941342	-0.00394647	0.570999	100	-0.12161	0.082665	-0.0320075	0.644274	-0.911756	-0.16019	0.200659	-0.102986	-0.895687	-1.05223	-1.14958	-1.24487	-0.519813	0.110374	-1.79681	0.4107	-0.91304	0.827686	-0.665797	-0.338118	-1.24032	0.594747	-1.31844	-0.524293	0.217923	-0.317795	-0.486736
101	3.16222	1.175	0.00249759	-0.677536	1.69982	-0.0230691	1.85495	0.0684792	1.96309	101	-0.316057	-0.0866837	0.0391961	0.659354	-0.423876	-0.951779	0.643168	-0.131226	-0.845786	-1.36088	-1.08697	-1.45338	-0.848184	0.176559	-2.06339	0.186367	-0.0335658	-0.864497	-0.151232	-0.115472	-0.681703	0.0607892	-1.37617	-0.767412	0.0601156	-2.06493	-0.0772795
102	0.235263	0.860139	1.39296	-1.81145	-4.19897	0.166054	-0.746912	-1.68441	0.480118	102	-0.379154	-0.0983152	-0.568217	0.684691	-0.495157	-0.156983	0.881146	-0.435722	-0.667218	-1.67987	-1.18699	-1.05055	-0.789284	-0.0256017	-1.35535	0.329024	-2.24264	-0.787299	-0.232949	-0.0447065	-0.733462	0.11977	-1.65977	-1.56011	0.59096	-2.18803	-0.391023
103	-0.349827	2.04555	1.29953	-0.139554	-1.08009	-0.499821	0.241425	1.3255	-0.460081	103	-0.655967	-0.414223	-0.154803	0.461229	0.262926	-0.866771	0.580573	-0.0586767	-1.22964	-1.27	-1.17671	-0.672452	-0.499016	-0.346356	-1.37522	0.374962	-1.59056	-0.476145	-0.581663	0.0995079	-0.746771	-0.207241	-1.55821	-1.2009	0.2613	-2.37824	-0.101733
104	-1.53639	-1.04208	1.37114	-3.77884	-2.74473	-0.891666	0.0567747	1.12493	1.69916	104	-0.393384	-0.184051	0.107103	1.11733	-0.410343	0.0111722	0.782607	-0.214321	-0.885999	-0.831453	-1.1514	-0.561951	-0.4794	0.270001	-1.7377	0.523852	-1.11642	-0.287075	-0.00504339	-1.7747	-0.32588	0.179318	-1.62656	-1.1459	-0.0243406	-1.8493	-0.49383
105	-6.00813	0.729775	0.106231	-1.74355	-0.62274	0.136543	1.74177	-1.18802	0.0964698	105	-0.789368	0.140662	0.253804	0.853782	-0.787103	0.0831993	0.899815	0.262996	-0.988789	-0.979886	-0.846566	-1.04809	-0.347884	0.26951	-1.62434	0.24967	-1.89465	-0.489774	0.798877	-1.11304	0.0463539	0.0673768	-1.28881	-1.07955	0.28781	-2.05996	-0.172088
106	-2.00281	-0.100729	1.07939	-1.53416	0.564707	-0.834729	-1.06707	1.38182	-0.687056	106	-1.28809	0.241008	-1.17733	0.956439	-0.196615	-0.443053	0.695672	-0.153363	-1.15603	-0.678088	-1.48268	-1.129	1.07194	0.407241	-0.285168	0.311812	-0.501937	-0.144633	0.760064	-1.08961	-0.42372	-0.160507	-1.64132	-1.32909	0.452721	-1.72015	-0.314371
107	-4.04131	-0.689792	-2.0636	-1.16891	-0.474885	1.73433	-0.231886	-0.342657	-1.84008	107	-0.0458806	0.0319306	-0.895506	1.10193	-0.824924	-0.361173	0.831877	0.293793	-1.36763	-1.04448	-0.713121	-1.17961	-0.473401	-0.0260073	-1.79758	0.364867	-0.484708	-0.0914704	0.204408	-1.41934	0.233115	-0.637901	-0.524191	-1.39386	0.331849	-1.92428	-0.0542015
108	-0.322057	0.482454	-0.435964	-0.14151	1.99858	0.592568	1.17394	-0.473564	0.128622	108	-0.508862	0.0165874	-1.00745	0.93064	-0.597299	-0.371292	0.923744	0.358433	-0.773235	-1.14838	-0.864483	-0.636939	-0.50998	0.0954772	-1.53254	0.340575	-0.653695	-0.0510079	0.0445538	-0.228113	-0.0477659	-0.116106	-0.558107	-0.997606	0.691839	-1.79818	-0.670895
109	1.11451	0.712916	-1.1587	-2.39487	2.69733	-1.69503	-1.16524	-0.288291	-1.73527	109	-0.876437	-0.0968871	-0.718817	0.516155	0.0489269	-0.0300912	1.02075	-0.611197	-0.463746	-0.974762	-0.703424	-0.681631	-0.98786	0.0188794	-1.80573	0.402955	-0.573525	-0.202849	0.329215	-0.911478	-0.359034	-0.230458	-2.05403	-1.12764	0.219765	-1.83101	0.439773
110	3.99902	-1.98857	1.37414	-1.27613	-1.09778	-0.147006	-0.590102	1.52326	0.754499	110	0.0833968	0.124242	-1.06697	0.100451	-0.323007	-0.895213	0.660543	0.0106375	-0.778245	-0.415554	-0.72336	-0.212393	-0.48761	0.193767	-1.56615	0.155957	-2.20717	0.136688	0.14491	-0.683274	0.0713507	-0.149321	-1.53085	-0.844732	0.739498	-1.65497	-0.354101
111	-0.91065	0.690012	-0.762589	-0.207093	0.738002	-0.874525	1.40888	-1.18945	0.0159231	111	0.0189773	-0.154961	0.290223	1.24617	-0.0368418	-0.049664	0.850765	-0.0891871	-0.829135	-0.305235	-0.577167	-0.39126	-0.339133	0.205627	-1.7538	0.553443	-2.01279	0.409054	-0.672909	-0.07537	0.00470837	0.143475	-1.72701	-1.36039	0.464625	-1.95459	-0.00335217
112	1.55614	-1.53811	-0.168876	-4.10595	2.65122	-3.80631	3.42683	-0.0445791	-0.616828	112	-0.261789	-0.0279302	0.012524	-0.410174	-0.369387	0.133669	1.10264	0.365922	-0.719798	-0.792046	-1.28598	-0.414684	-0.491445	0.0559975	-1.8767	0.140705	-1.6123	0.731893	-0.0803456	0.1192	0.166902	-0.14826	-1.55366	-1.0221	0.37726	-1.64106	-0.0376444
113	-0.380298	-2.2414	-0.814212	-0.819818	2.52767	-0.139533	0.879078	-0.0579874	0.771446	113	0.10945	-0.0534769	-0.954563	-0.0688271	0.192289	-0.40824	0.787245	0.0633828	-0.528338	-0.948571	-0.592525	-0.563406	-0.672912	0.437577	-1.4838	-0.128758	-1.23648	0.497927	0.148025	0.120206	-0.255612	-0.333521	-1.70002	-0.875314	0.666889	-1.39497	-0.0264493
114	-2.21238	-2.43304	-0.220015	-2.60704	-1.07679	1.14713	1.05951	-0.409896	1.39077	114	-0.214847	0.264424	-0.585403	-0.628768	-0.0962428	-0.55155	1.14109	0.818484	-0.493683	-0.650078	-0.400505	-0.833161	-0.700444	0.572899	-0.89562	0.275626	-1.84612	0.675003	0.618942	-1.31787	-0.0698051	-0.237124	-1.83741	-1.00831	0.394532	-1.49484	0.455381
115	-2.04063	0.300135	0.694248	-1.96727	0.459883	0.417575	2.91766	-1.81432	-0.486309	115	-0.137096	0.392829	-0.616737	-0.819806	-0.0857827	-0.633944	0.291762	0.647951	-0.61399	-0.547037	-0.669116	-0.541035	0.0309295	0.53233	-1.55824	-0.172536	-1.53896	0.055966	0.500736	-1.2035	0.464955	-0.505202	-1.30596	-1.03694	0.811794	-1.47514	0.182584
116	-2.65273	0.458358	1.35608	-3.14023	-0.679362	-1.16472	-1.67976	-1.48748	0.217511	116	-0.24625	-0.0606712	-0.663308	-0.256693	0.706171	-0.286054	0.467213	0.0671363	-0.28561	0.153278	-0.962092	-0.292999	-0.125217	-0.366066	-1.11538	0.183322	-0.818313	0.764447	0.400519	-1.22885	1.21352	-0.415483	-1.49019	-0.453773	0.876925	-1.64287	-0.0731912
117	-2.88423	0.890588	0.0892757	-2.61174	-0.303799	-0.206944	-0.760575	-0.760661	-0.00015155	117	-0.410372	0.477985	-0.283439	-0.742808	-0.100224	-0.560215	0.268547	0.116825	-0.460388	-0.599275	-0.508747	-0.582366	-0.683187	-0.606254	-1.52353	0.140239	-0.749528	1.44468	1.63603	-1.45834	0.565801	-0.0909126	-1.37096	-0.533197	0.826376	-1.48075	0.0801719
118	0.953545	1.52243	-0.637194	1.65929	0.176073	0.568078	2.82254	0.14995	0.376727	118	-0.374859	0.533531	0.128475	-0.625753	-0.0650331	0.26686	0.391452	-0.177296	-0.571199	-0.462334	-0.851882	-0.518564	0.187666	-0.362333	-1.28428	0.02291	-0.529604	-1.0914	0.842432	-0.573652	0.256633	-0.163292	-1.13123	-0.690204	-0.806256	-1.32043	0.15699
119	-0.868709	-1.14933	2.03667	-0.388137	1.07176	1.39466	0.468836	1.08028	0.64164	119	-0.582229	0.384864	-0.36076	-0.481241	-0.268075	-0.560694	0.69831	-0.408894	-0.242595	-0.859751	-0.728971	-0.789372	-0.133133	-0.852418	-0.972619	0.376532	-0.249252	-0.0357715	-0.418648	-0.781637	0.549057	-0.180336	-1.54665	-0.643955	-0.863335	-1.21577	0.35123
120	-0.552741	-0.071382	2.56409	-0.865056	-0.445556	-1.9141	1.30617	-0.753434	-0.138855	120	-0.705316	0.368627	-0.293473	-0.0800858	0.138319	-0.392061	0.439646	-0.0705359	-0.428713	-0.739999	-0.486153	-0.579457	-0.1027	-0.934704	-1.40554	-0.15285	-0.445209	-0.341689	0.290913	-0.0836108	0.697703	-0.102985	-1.16924	-0.348575	-1.1234	-1.76419	0.716556
121	0.442062	-0.451424	-0.967992	-2.15419	-0.787089	0.642714	0.0229524	-2.20843	0.636103	121	-0.992079	0.58512	-0.297148	-0.118604	0.159372	-0.191157	0.303163	0.327038	-0.304632	-0.47938	-0.114961	-0.517109	-0.612783	-0.814809	-0.835978	0.15198	-0.635795	-0.283929	-0.0691897	-0.152412	0.0193058	-0.0898578	-0.473278	-0.477931	-0.600528	-1.17493	0.299248
122	1.07643	-1.26119	-0.280248	-1.45235	-1.71473	0.845421	0.531389	0.159093	1.22363	122	-0.936413	0.476664	-0.202012	-0.582484	-0.395847	-0.131783	0.567255	0.887414	-0.803404	-0.407893	-0.663111	-0.207026	-0.445869	0.0489337	-1.34817	0.068144	0.166418	0.110445	-0.657709	1.11179	-0.91259	-0.545313	-0.928882	-0.854162	-0.817917	-1.61	0.605382
123	1.45117	0.101161	0.142536	-0.830136	-1.17646	-3.05924	-0.976903	-0.366951	0.25522	123	-0.740636	0.714037	0.0562648	-0.300243	0.112378	0.326624	0.322521	0.363786	-0.882062	-0.670188	-0.482757	-0.294654	-0.296605	-0.708216	-0.337192	-0.0905269	-0.0410682	0.0476799	0.189627	-1.24159	-0.743098	-0.201112	-0.548417	-0.177855	-1.13625	-1.04637	-1.4455
124	1.81702	0.77463	0.240931	-0.809336	-0.000218443	-0.721519	1.02333	-0.357959	-0.389902	124	-0.904705	0.0363755	-0.464592	-0.633769	0.185856	-0.289934	0.557156	-0.201076	-0.641681	-0.496139	-0.124215	0.131296	-0.0572227	-0.53338	-0.966255	0.0384003	-1.41334	-0.20553	0.0417183	-0.988999	-0.742144	-0.329435	-0.759559	-0.340272	-0.939545	-0.945015	-1.08563
125	-0.572858	-0.273192	0.473131	0.680736	1.47801	-0.207506	1.47092	-1.18114	-1.28452	125	0.283737	-0.147522	-0.0708613	-0.384039	0.268846	-0.180162	0.428278	-0.27056	-0.650898	-0.184574	-0.283255	-0.361767	-0.236723	-0.206434	-0.580004	-0.0417629	-1.48601	-0.13142	0.166757	-0.848953	-1.12215	-0.197713	-0.90637	-0.226471	-0.887741	-1.25284	-1.311
126	-0.647329	0.201818	1.99569	0.121099	-0.308586	-0.0289856	0.237514	-2.04244	-1.17443	126	0.0584434	0.00610905	0.0184351	0.0479865	0.0229239	0.828634	0.651007	-0.0024907	-0.737006	-0.265062	-0.401588	-0.328862	-0.127184	0.293586	-1.02209	0.360518	-1.32438	1.04751	-0.00225442	-0.0287039	-0.216113	0.203083	-0.730599	-0.795101	-0.748336	-1.0985	-1.14335
127	-0.676149	0.713648	0.285251	0.922236	2.70921	-0.386164	-0.772597	-0.085124	-0.150875	127	-0.423569	0.271069	-0.0593803	-0.778811	0.513551	0.625516	0.794538	-0.577774	-0.283518	-0.279523	0.215819	-0.481747	-0.475417	-0.0271173	-0.688681	0.087621	-0.641257	0.478034	-0.567765	-0.904579	-0.496898	-0.346081	-0.637048	-0.325056	-0.975262	-1.10288	-1.1573
128	0.238385	1.7501	0.725734	1.23406	0.178052	0.912883	-0.857128	0.244707	-0.817268	128	-0.172282	0.0509321	-0.0929249	-0.0854612	0.0475844	-0.321735	0.827827	-0.464329	-0.242634	0.130774	0.158376	-0.490023	0.260774	-0.0246359	-1.20318	-0.271891	-0.672057	0.795481	-0.366587	0.500577	-0.240299	-0.513194	-0.76459	-0.420711	-0.653967	-0.760032	-0.959097
129	-1.92931	-1.22288	1.22002	-0.41891	-0.761827	1.07459	-0.59935	1.14848	2.24158	129	0.101187	0.563606	-0.125535	-0.011604	-0.159299	-0.0347961	0.924492	-0.431522	-0.444238	-0.082203	-0.0928596	-0.267317	-0.168187	-0.314025	-0.490806	0.393649	-0.62237	0.640339	-0.406655	0.45118	0.212125	-0.0669429	-1.10763	-0.551381	-0.961268	-0.797726	-0.720516
130	-0.544211	-1.97604	0.134223	1.16442	1.83081	-1.67695	0.991698	1.31594	-0.432618	130	0.294014	1.31436	-0.470889	0.178567	0.95003	-0.200293	0.830096	0.412036	-0.306253	-0.333581	-0.00347024	0.0342887	0.154284	-0.34952	-0.684293	0.0443471	-0.711266	0.903123	0.409258	0.114888	-0.16755	-0.50519	-0.791202	-0.228463	-0.562757	-0.327478	-0.794481
131	-0.282655	-1.18676	-0.705315	-0.657698	1.09478	-0.984472	-0.207463	-0.668227	-1.39463	131	-0.649427	0.700489	-0.390118	-0.777022	0.0592474	-0.354014	0.693798	-0.0443956	-0.288876	-0.411293	-0.0419136	-0.331421	-0.0518146	0.0549686	-0.854299	0.342259	-0.23684	-1.07489	-0.626844	0.563006	0.349512	0.119981	-0.78863	0.0981379	-0.917111	-0.663942	-0.998535
132	-1.75683	0.343228	0.346651	0.0746762	0.0819163	-1.49317	0.350859	-0.624004	0.379976	132	-0.590507	0.907176	-0.0449168	-0.545551	0.528775	0.408938	0.65467	-0.334414	-0.38911	0.0674746	-0.272524	-0.236921	-0.120006	0.478164	-0.724553	0.46954	-0.13061	-0.65659	-0.110466	0.745263	-0.35994	-0.26574	-0.642378	-0.287561	-0.810564	-0.738996	-0.692636
133	-0.285176	-2.33658	-1.35216	-0.318651	0.284916	-0.989365	1.84726	-0.128276	0.033587	133	0.195798	1.08517	-0.189363	-0.274718	0.431561	-0.599972	1.12593	-0.747297	-0.157167	-0.345934	0.358222	0.0718076	-0.199751	-0.0760356	-0.871175	0.464383	-0.0104796	-0.541494	0.705261	-0.71916	-0.993162	0.12866	-0.979422	-0.548037	-0.310068	-0.63493	-0.460697
134	0.0177956	-0.559068	-1.71493	0.806137	-0.937755	-0.55621	-0.284284	1.3837	0.61415	134	-0.206041	0.363373	-0.340817	-0.0586623	0.127595	0.0345817	-0.217896	-0.122513	-0.832855	-0.459701	0.0120351	-0.553675	0.212347	0.577068	-0.574314	-0.239702	0.339697	-0.0938033	-0.147002	-0.46954	-0.312952	-0.704566	-0.327734	0.0778123	-0.639541	-0.372963	-0.777262
135	1.28847	-1.25535	0.836348	2.21142	1.35987	-1.70901	1.87606	0.00576439	-0.742332	135	-0.0662192	0.760052	0.122545	-0.933221	0.780549	0.322433	0.06973	0.183306	-0.52515	-0.288333	-0.0414706	-0.32801	-0.118334	-0.1562	-0.525617	0.508352	-2.21615	-0.293076	-0.294353	-0.342861	-0.0330731	-0.10202	-0.500262	-0.0475229	-0.836269	-0.328925	-0.840153
136	-3.01724	1.1799	0.30693	-0.306577	-1.71408	0.00873112	-0.458644	-0.0167935	1.66059	136	-0.464351	1.03741	0.481339	-0.181812	0.542502	-0.425926	-0.0933027	0.0179121	-0.302061	-0.124051	-0.202037	-0.280409	-0.321188	0.603453	-0.0511321	0.0339664	-1.41869	0.116127	-0.726736	-1.09052	0.738156	0.356568	-0.935143	-0.32299	-0.260599	-0.597347	-0.38235
137	-0.921502	-3.1651	-0.961241	-0.47778	0.983006	0.303612	-1.12359	0.120805	0.830375	137	-0.267146	0.612653	0.0735851	-0.126199	0.406443	0.0460206	-0.218257	-0.0317321	-0.271822	-0.648929	-0.458096	-0.295908	0.74126	1.06068	-0.557535	0.0585434	-1.55888	0.343695	-0.101635	-0.299549	0.136371	0.199189	-0.794556	0.404676	-0.382171	-0.557686	-0.292891
138	0.623337	-0.290543	-0.314539	-0.807934	-1.95481	0.173866	0.524782	-2.45865	-0.152233	138	-0.28857	0.195735	0.0909952	0.108311	0.514761	0.36903	-0.14069	-0.147384	-0.409715	-0.260514	-0.315644	0.0652368	0.50173	0.604214	-0.316074	0.478209	-0.521601	0.815044	-0.280129	-0.39245	0.244754	-0.220007	-0.504064	-0.497392	0.0390858	-0.308223	-0.218174
139	-0.332064	1.33993	-1.0256	-0.73896	-0.844622	-1.10485	0.587979	-0.618207	0.291701	139	-0.089077	0.280287	0.140656	-0.364615	0.848408	0.206697	-0.102427	-0.36303	-0.586275	-0.294366	-0.298908	0.388612	-0.14626	0.508807	-0.712933	0.2579	-0.397917	0.723006	-0.183259	-0.694773	0.0817024	-0.161321	-0.404289	0.125827	-0.217922	-0.272607	-0.265253
140	0.045353	-0.462215	0.149138	-0.383786	0.730104	0.818424	-1.58695	0.678183	0.300294	140	-0.207446	0.151576	-0.0257549	-0.422839	0.717997	0.507042	-0.0147607	-0.150449	-0.219551	-0.485557	-0.519674	0.331681	-0.0311163	-0.596025	0.12278	0.30242	-0.496133	0.91197	0.272459	0.145407	0.716737	0.0971325	-0.23955	0.0256644	0.0389984	0.0702015	-0.2135
141	3.01671	-0.364846	-0.0932378	-1.61613	-0.0849888	0.0758992	-0.552663	-0.228714	-0.370723	141	-0.138263	-0.31794	-0.135821	0.0485568	0.275357	-0.0641421	0.110581	-0.180897	0.249932	0.280547	-0.352512	-0.171865	0.32282	-0.242223	0.0682967	0.416866	-0.472112	0.952065	-0.0670515	0.273907	0.74741	0.125647	0.0557876	-0.21103	-0.197186	-0.256913	-0.628146
142	1.89194	-1.21384	-1.3201	-0.357703	-2.99742	1.0695	0.956345	0.00449483	0.00893833	142	-0.41006	0.0452806	0.154392	0.150291	-0.212701	0.171335	0.0583201	-0.193176	-0.164316	0.0279724	-0.0302969	-0.00453437	-0.120498	-0.159125	-0.490661	-0.0150735	-0.533157	1.44069	0.360358	-0.0175884	0.716832	-0.254578	-0.233065	-0.0947491	-0.178796	-0.127136	-0.157881
143	1.56508	-0.154015	0.856878	1.807	-0.654206	1.62091	1.59035	-0.204093	0.534791	143	-0.565583	-0.0323446	-0.0626413	-0.20054	-0.15313	0.536317	0.0569841	0.576269	-0.194547	-0.644667	-0.175259	-0.161131	-0.483824	-0.349447	-0.216269	0.269423	-0.177164	-0.889617	0.583894	0.89882	-0.295349	0.206217	-0.0293399	-0.152044	-0.0328362	-0.209165	-0.0863286
144	0.5653	1.10747	-0.0609107	-0.120689	0.140094	-0.976816	-0.818116	0.4079	-0.533957	144	-0.304413	0.191282	-0.215146	0.336727	-0.15815	0.581089	-0.178407	0.158149	0.37409	-0.372078	-0.0251777	-0.0773652	0.304727	-0.162362	0.185122	-0.152459	0.740981	-0.959526	-0.684344	0.650877	-0.302505	0.222387	0.13402	0.533993	0.0138051	-0.282216	0.179247
145	-1.99734	2.84716	-0.607874	-0.738953	-1.94017	0.550159	-0.213654	2.18399	-0.485065	145	-0.372362	-0.144284	-0.0414581	-0.52076	0.344869	-0.277273	-0.0324217	0.00133427	0.207905	0.416387	-0.138637	0.522085	-0.407423	-0.136049	-0.0248549	0.0723781	0.583826	-0.950408	-0.420693	-0.661714	-0.434072	0.478756	-0.504437	-0.195964	-0.03974	-0.22931	0.150902
146	1.47665	-0.383648	-1.06873	-0.588531	1.90467	-0.413975	-1.16242	0.22403	-0.616394	146	0.284257	-0.298862	0.199543	-0.267741	0.199311	-0.341317	0.443032	-0.42868	-0.128557	0.199053	0.373924	0.0526469	0.449321	0.533403	-0.0971776	0.00175836	0.182779	-0.0109229	0.253959	-0.932607	-0.761464	0.350047	-0.140744	0.537563	0.173473	0.328235	0.112974
147	-1.26075	1.48651	1.31519	-0.534509	-1.34546	0.941728	0.276208	0.0648988	-0.472881	147	-0.216831	0.264921	-0.154902	0.331133	0.292661	-0.29697	0.0718557	-0.334682	-0.435985	0.284138	-0.223498	-0.0396958	-0.202553	-0.137288	-0.170609	-0.326192	0.398847	-0.443455	0.113534	-0.145992	-0.0879803	0.414338	0.168682	0.342158	0.0565326	-0.146985	0.0186051
148	0.44652	2.04465	-0.420333	-0.330225	1.01133	0.637596	0.631416	0.83149	-0.541933	148	0.269514	0.0696358	-0.0273809	0.564245	-0.537153	0.00903683	0.010479	-0.234179	-0.209245	-0.014307	0.288522	0.0294233	0.214363	0.0283231	0.216317	-0.136846	-0.227245	0.450436	0.644926	-0.232808	0.274808	-0.568692	0.233534	0.127819	0.159497	0.200201	0.363394
149	1.26668	1.31349	0.374596	-0.869747	-0.209879	1.0667	0.279688	-0.487117	0.085962	149	1.13955	0.0958774	0.476596	-0.129558	-0.179365	-0.0308355	-0.459807	0.244828	0.251569	0.0332872	0.22335	-0.433394	-0.000535895	0.255998	0.298042	0.135186	-0.402893	0.284598	-0.680486	-0.219824	0.033283	-1.11261	0.262755	0.190449	-0.0588846	0.52509	0.448612
150	1.20833	0.242964	1.09832	0.925742	1.44507	1.06537	-1.51328	-1.05275	0.903391	150	0.314189	0.126434	-0.193181	-0.312354	0.128302	-0.287241	-0.0806157	0.391035	0.0491539	-0.210334	0.0595847	0.28383	-0.0763969	0.36877	0.231794	-0.26504	-0.0938612	0.126136	-0.104098	0.386931	0.109037	0.138484	0.0528059	-1.07819	0.104135	0.198198	-0.401378
151	-0.0293019	-0.618934	1.94699	-2.52638	-0.635692	-0.0650408	-0.151279	1.24025	0.58444	151	0.205563	0.00538351	0.391962	0.135845	0.103525	0.50752	-0.166442	0.473709	-0.329227	-0.250602	0.561169	0.0790807	0.021539	0.314979	-0.230396	0.181552	-0.0440955	0.516328	-0.134638	0.180958	0.0973493	-0.828272	0.320265	-1.44624	0.13147	0.0613344	-0.137757
152	-3.79268	-0.0989942	0.566359	-0.561873	0.54086	-1.04872	2.6658	0.866723	0.918023	152	0.0703405	0.614661	0.556316	-0.0537557	0.227316	-0.397439	-0.2061	-0.0313925	-0.362855	-0.569014	-1.6458	0.10105	-0.35462	0.430979	-0.678989	0.360119	-0.470269	1.26946	-0.218818	0.550214	0.624191	-1.35763	0.222017	-0.956579	0.456442	0.408557	0.056992
153	-0.562421	0.479953	-0.159356	-1.20986	2.43734	2.16259	0.32432	-0.468682	1.57481	153	0.175029	0.562262	0.0380282	0.462354	-0.0375169	0.644264	-0.263217	0.339603	0.271625	-0.317349	-1.84585	0.65616	-0.342918	0.584854	-0.301995	0.327292	0.213078	1.46724	-0.200411	0.615374	-0.347823	-1.14414	-0.291282	-0.702565	0.27047	0.996933	0.281582
154	0.0916503	0.343064	0.750197	-0.390264	0.996538	0.725994	1.80825	1.40479	0.296562	154	0.0239635	-0.0965587	0.204547	0.689129	-0.00760302	-0.00951707	-0.50564	-0.032027	-1.14185	-2.00565	-1.81543	0.0821404	-0.409832	-0.353619	-0.324271	0.115995	-1.19134	-0.589469	-0.0650992	-1.1026	0.230395	-1.2971	-0.522029	-0.652821	0.143217	-1.66762	0.651111
155	-1.88233	0.0220384	0.810488	-1.68085	-0.380579	0.41862	-2.04747	0.723557	2.02589	155	-0.532188	0.150866	0.713815	0.533383	0.0361	-0.363308	-0.831638	-0.622494	-1.50969	-1.82308	-1.12679	-0.00202642	-0.31519	-0.109083	-0.33806	-2.08937	-1.33396	-0.8245	-0.242245	-0.489136	-0.0369371	-1.41211	-0.728288	-0.373898	-0.0930416	-1.33531	0.487903
156	0.768221	-2.14629	-0.423414	3.11187	0.562876	2.63164	3.25948	2.19249	1.49889	156	-0.144616	0.326309	0.745527	0.522531	0.803006	-0.268607	-0.545936	-0.381324	-1.72008	-2.3753	-1.62336	-0.229999	-0.849167	0.0558617	-0.152721	-1.25902	-1.32683	-0.057387	-0.85461	-1.02934	-0.233906	-2.11142	-0.864514	-0.436603	-0.011719	-1.78675	0.622665
157	-0.407609	0.820947	2.89255	2.17441	-1.26227	1.97155	2.42411	1.57772	2.34612	157	-1.01338	0.697472	0.610828	0.571214	-0.307037	-0.300416	-0.258049	-0.787236	-1.49654	-2.27245	-1.92903	0.167561	-0.809196	-0.761559	-1.05179	-1.70484	-0.737248	-0.168949	-0.58673	-0.759837	-0.041469	-1.93194	-1.40286	-1.11824	0.495524	-1.27183	0.900887
158	-0.597357	-0.00741251	1.94207	-1.75029	0.115417	-0.114915	3.0608	4.42093	1.17807	158	-0.586301	0.123731	0.974095	1.27089	-0.174477	0.153968	-0.620285	-0.384532	-1.95325	-1.9718	-1.54455	0.0417122	-0.296802	-2.11331	-1.04677	-1.35814	-0.938075	0.308595	-0.284638	-0.364661	-0.449242	-1.58621	-1.07819	-0.902102	-1.72795	-1.35527	0.275418
159	0.167663	-0.111852	1.44645	0.782672	-0.829768	1.09188	3.06464	2.45245	3.51201	159	-0.645675	-0.173649	-0.127763	0.628742	0.446584	-0.442459	-0.712422	-1.31621	-1.91509	-2.1435	-1.64659	-0.62149	-0.66652	-2.08972	-1.29749	-1.79528	-1.94823	0.626139	-0.704796	-1.56016	-0.118225	-1.39296	-1.50223	-1.15533	-1.95372	-1.49009	0.0966781
160	2.46494	0.78173	0.902493	2.30394	-0.191338	2.51124	3.73784	2.91249	1.48555	160	-0.343121	-0.0455723	0.015255	0.800411	-0.0168837	-0.0863731	-0.918927	-0.833957	-2.22008	-2.08518	-1.60977	-3.05601	-1.1119	-2.08806	-1.75014	-1.27369	-2.18459	-1.82464	-0.562326	-1.75808	-0.458306	-1.46613	-1.53428	-0.952822	-1.32758	-1.53031	-0.211073
161	1.7667	0.621474	-0.622884	-0.431002	-0.422601	3.629	6.29882	4.6082	2.09776	161	-0.388346	-0.378358	0.101317	-1.40437	-1.44571	-0.456069	-0.836721	-0.971835	-2.21256	-1.90103	-0.991282	-2.85778	-0.799511	-1.63099	-1.48568	-1.7897	-1.9711	-1.45622	-0.796553	-1.1564	-1.59108	-1.5537	-1.5455	-1.1737	-1.88615	-1.92569	-2.2897
162	-0.364286	-0.704145	-0.983809	3.1271	1.18909	2.40871	4.11667	2.76366	4.39077	162	-3.12103e-05	-0.329938	0.461584	-1.13041	-1.71122	0.520527	-1.37811	-1.2597	-2.16646	-1.94838	-1.9849	-2.97475	-1.17832	-2.18067	-1.60183	-2.10552	-1.38636	-1.20221	-1.15791	-1.64424	-1.87821	-2.88809	-1.94337	-1.40829	-1.80202	-1.31116	-1.65846
163	-3.55851	-0.0200128	1.73423	0.793209	0.965922	2.46305	4.2574	6.95761	4.62564	163	-0.406084	-0.727076	-0.0172834	-1.14039	-1.37248	-0.538977	-1.23004	-1.61012	-2.71994	-2.18281	-1.58575	-2.73233	-1.10099	-1.81606	-1.85091	-1.84868	-0.963596	-1.21625	-1.50583	-1.92266	-1.59142	-2.66437	-1.63163	-1.33127	-1.38125	-1.19967	-1.91234
164	-0.313246	1.62248	-1.24172	1.15235	1.3462	2.55832	4.03559	6.07329	6.14478	164	-0.851306	-0.745474	-0.694795	-0.765334	-0.887118	-0.343806	-1.66525	-1.66955	-2.77656	-1.88547	-3.07756	-2.84042	-2.62283	-2.37759	-1.90124	-1.86546	-3.18087	-1.26965	-1.14452	-1.28227	-1.43337	-2.41044	-2.84794	-0.833536	-2.07738	-1.53643	-2.00796
165	-0.201136	-0.192537	0.660502	3.72553	3.44538	3.6592	5.80728	7.82295	6.44762	165	-0.544583	-0.645945	-0.499053	-0.0928837	-1.09496	-0.508399	-1.96124	-1.77208	-2.85086	-1.76687	-3.23507	-2.75485	-2.73148	-2.47812	-1.59831	-1.58482	-2.63854	-0.544989	-2.0535	-3.09439	-1.63096	-2.36601	-3.24153	-1.67681	-1.73291	-1.56392	-1.39861
166	0.592521	0.340762	0.266553	2.95756	3.83936	2.10136	5.68885	7.17872	5.3989	166	-1.36386	-1.00395	-1.02814	-0.521323	-1.42738	-0.897703	-1.74891	-1.68122	-3.0826	-1.57247	-3.5626	-3.07753	-2.95386	-2.33096	-2.27356	-2.33026	-2.4369	-1.21598	-1.50788	-2.91529	-2.49278	-1.91654	-2.98503	-3.0189	-1.9161	-1.86767	-1.84981
167	-0.0073051	-0.891844	-0.20437	5.62482	0.873172	5.26967	7.71128	5.27682	5.94609	167	-1.07839	-1.23855	-1.29677	-1.37229	-1.55645	-0.439526	-1.65214	-2.13856	-3.506	-3.56209	-3.39844	-2.56024	-3.32549	-2.26472	-2.26208	-2.07986	-2.74372	-2.3215	-1.87426	-2.64603	-2.41946	-2.60789	-3.22509	-3.00988	-1.96713	-1.91144	-1.96455
168	2.38234	-1.33803	0.174924	2.19244	1.10897	4.32274	5.82109	3.17278	6.73128	168	-1.27194	-0.758847	-1.00692	-0.9418	-0.951012	-0.978006	-2.07256	-1.77478	-3.33862	-3.22064	-2.93762	-2.95198	-2.48743	-3.89379	-2.35688	-2.23947	-2.59316	-2.6318	-1.96113	-1.57736	-1.8889	-2.17457	-2.8403	-3.36207	-2.12103	-1.9885	-1.51263
169	1.10562	2.38359	1.31167	0.833251	2.90334	2.06487	7.8945	6.70206	7.85955	169	-0.985391	-0.470174	-0.926175	-0.918595	-1.43527	-1.18306	-1.63445	-1.82163	-3.43069	-3.43199	-2.78631	-3.12312	-3.33129	-3.0689	-2.15389	-1.71351	-2.61498	-2.33816	-1.74875	-2.18272	-1.85307	-2.38902	-3.02289	-3.4829	-1.72662	-1.94209	-1.64855
170	-0.0463241	1.41291	0.102018	2.09077	2.33188	5.40797	7.70134	7.41995	7.93361	170	-1.52894	-0.808	-0.883899	-1.42434	-1.73779	-1.37763	-2.19047	-2.24073	-3.33288	-3.58842	-3.19594	-2.63317	-2.86384	-3.78566	-2.42703	-2.04904	-2.35157	-1.9047	-1.32279	-2.43469	-2.5609	-3.25871	-3.27201	-3.44104	-1.94287	-3.63005	-1.95893
171	0.3568	-0.467413	2.87561	4.9126	3.70546	5.15382	7.2452	7.85549	8.63003	171	-0.937572	-0.600343	-1.12312	-0.79793	-1.37829	-0.856449	-1.64564	-2.3669	-4.02864	-3.52895	-3.09459	-3.12934	-3.18714	-3.61021	-2.71391	-3.72856	-4.32956	-2.11382	-1.2843	-1.87168	-2.90246	-2.81466	-3.45733	-3.1309	-1.9331	-3.49374	-1.61416
172	3.54398	3.44311	-0.448987	0.155561	3.91157	3.9008	6.74993	7.11136	7.48927	172	-1.71646	-0.979953	-1.19465	-1.50974	-1.75302	-1.28816	-2.6128	-2.58632	-3.55865	-3.38272	-3.18349	-3.03394	-3.31743	-2.8583	-2.69144	-4.04762	-3.71871	-1.73693	-0.918059	-2.82517	-2.32849	-3.20985	-2.81205	-3.06868	-1.86431	-3.40633	-2.17728
173	0.586684	-0.310006	1.05052	5.15402	3.32646	2.8017	6.19267	8.18674	7.23076	173	-1.22942	-0.75098	-1.21165	-0.938675	-1.92862	-1.84878	-2.05778	-2.41449	-3.9318	-2.88212	-3.0055	-3.05992	-3.55775	-3.47887	-2.53228	-3.7262	-4.20853	-1.92492	-0.858422	-2.73251	-2.46826	-2.97217	-3.03247	-3.35617	-2.25199	-3.7655	-1.74349
174	-0.792915	1.59208	2.44189	2.9926	4.89725	4.51242	6.01555	9.49172	6.69159	174	-1.17425	-0.895317	-1.27696	-0.461068	-1.6493	-1.37946	-2.24658	-2.49542	-4.18124	-3.43147	-2.62357	-3.28629	-3.37166	-3.23402	-3.0598	-3.44073	-3.57186	-2.34183	-0.808918	-2.14842	-2.09779	-3.19798	-3.23717	-3.02337	-1.86719	-3.2593	-1.95199
175	0.940209	1.23512	1.04997	3.68524	2.88791	4.65634	7.86708	6.83388	8.6494	175	-1.37244	-1.43875	-0.974417	-0.822838	-0.981694	-1.38139	-2.36101	-2.64758	-4.83217	-3.19077	-3.33175	-3.29727	-2.80036	-3.64344	-3.51881	-3.26943	-3.76916	-4.28945	-1.50802	-3.18724	-1.69159	-3.09724	-3.4214	-3.34674	-2.1813	-3.75103	-1.68576
176	1.69802	1.70132	0.691864	3.81279	3.02914	4.56359	5.50203	7.19028	6.65929	176	-1.59938	-1.50311	-1.6532	-0.714462	-1.56798	-0.811313	-2.49257	-2.59926	-4.49272	-2.69596	-3.05186	-2.90538	-3.15764	-3.16822	-2.8546	-3.33586	-3.1392	-4.10461	-1.62134	-2.30221	-2.85576	-2.8821	-4.17234	-3.08784	-2.39855	-4.41528	-2.03749
177	-0.232663	-0.221754	0.998855	2.01239	-0.115261	4.78847	6.21881	7.21289	9.82709	177	-1.69767	-2.13934	-1.24145	-0.293008	-1.16272	-1.53084	-2.30654	-2.96686	-4.35957	-3.16113	-4.75031	-3.1019	-3.37072	-3.48134	-3.4138	-3.47098	-3.61285	-4.11987	-1.77265	-3.62539	-2.76899	-2.73849	-4.437	-3.88332	-1.96085	-4.07978	-1.7601
178	-1.30173	1.75301	2.13593	2.46327	2.21078	5.97363	7.34427	7.03137	7.64166	178	-1.66483	-1.59035	-1.3502	-0.606407	-1.53852	-1.08722	-2.57938	-3.42575	-4.37957	-3.0409	-4.73126	-3.56021	-3.37756	-3.32316	-3.54162	-3.15354	-3.78893	-3.56616	-2.91747	-3.09242	-2.61963	-4.18883	-3.94185	-3.30252	-1.79248	-3.78617	-3.48517
179	0.0172452	0.408225	0.643695	1.53694	4.8215	4.18562	4.60982	6.61493	10.1415	179	-1.05329	-1.74469	-1.42138	-0.291969	-3.19826	-1.21601	-2.46415	-2.7276	-5.00099	-4.3268	-4.75287	-3.59497	-3.27441	-4.62613	-5.12968	-3.33399	-4.10485	-3.52365	-2.97083	-3.05141	-2.96357	-3.7272	-3.76582	-4.10123	-2.40765	-3.88281	-3.66445
180	0.86778	0.079019	2.157	3.49143	5.12109	5.39741	8.56076	7.2824	8.65396	180	-1.74504	-1.12007	-1.47246	-2.30977	-2.15772	-1.1291	-2.65845	-3.6377	-4.81658	-4.19829	-4.54259	-3.13842	-3.51807	-4.6956	-4.605	-4.77047	-3.50519	-3.24781	-3.17127	-3.67695	-3.2403	-4.00045	-3.84182	-3.68803	-1.79049	-3.52286	-3.38181
181	2.04082	3.99297	1.16801	3.35753	2.86999	4.62899	8.74509	8.20239	8.65664	181	-2.18684	-1.12985	-1.0903	-2.01016	-2.23501	-1.63126	-2.43255	-3.56806	-4.88367	-4.02735	-4.64118	-3.16405	-3.76876	-5.0324	-5.34125	-4.37448	-3.81493	-3.72883	-2.59679	-3.77363	-2.95618	-3.40673	-4.44229	-3.47474	-3.72985	-3.50628	-3.61889
182	1.29069	1.59569	0.48421	2.49772	1.89238	6.17456	7.41341	6.69626	6.88963	182	-2.07927	-1.608	-1.49704	-1.90187	-2.45628	-1.62115	-2.848	-3.56668	-4.811	-3.74155	-4.39325	-2.60794	-3.19865	-4.85249	-5.53256	-4.93469	-5.39429	-3.12689	-2.78737	-3.0997	-2.94311	-3.56192	-4.02702	-3.62972	-3.7962	-3.34901	-3.49138
183	1.38771	3.05776	2.18122	5.06817	3.70147	5.18463	6.47103	8.16906	6.77988	183	-1.82947	-1.83034	-2.44789	-1.82023	-2.47461	-1.49619	-3.01956	-3.15443	-4.97722	-3.42462	-4.28943	-4.91435	-3.36473	-4.82269	-5.0049	-4.28123	-5.46923	-2.98954	-2.45836	-3.02396	-3.14213	-3.42478	-4.02825	-3.8122	-4.05079	-3.60512	-3.70371
184	0.252991	1.88229	3.52773	4.7028	5.15237	5.57185	7.70255	6.96167	7.07319	184	-1.98736	-1.47929	-2.71104	-1.8295	-2.67417	-1.11618	-2.50735	-3.58243	-5.27299	-3.33618	-4.68721	-4.5674	-3.74777	-4.60675	-5.29154	-4.79638	-5.20204	-4.77944	-2.12011	-3.03957	-3.13602	-3.29949	-3.88181	-5.42634	-3.66663	-3.71397	-3.44018
185	-0.993941	0.513745	1.04621	4.89793	4.43622	7.27448	8.30144	8.88329	8.63854	185	-1.80021	-1.57222	-3.06636	-1.44541	-2.91727	-1.43625	-2.8354	-3.45954	-5.30863	-3.57267	-4.67953	-4.86775	-3.76974	-5.04266	-5.56159	-4.47512	-5.31666	-4.86419	-2.7037	-4.0922	-2.89473	-3.46621	-4.63868	-5.0725	-4.09779	-5.01731	-3.26129
186	2.15028	2.01316	2.08889	3.21526	3.18906	4.2196	7.48071	7.45852	7.82265	186	-1.51094	-1.55605	-2.81991	-1.79772	-2.73268	-1.70215	-2.76333	-3.47617	-5.53897	-3.48189	-4.17489	-4.99385	-3.71438	-4.56171	-5.65156	-4.3914	-5.33911	-4.60913	-2.08111	-4.11088	-2.33841	-3.28069	-4.92999	-5.02761	-3.81891	-4.94711	-3.50266
187	0.262587	-0.227364	0.414085	6.29151	3.18387	6.10248	7.7531	9.22273	7.25482	187	-2.06037	-1.47288	-2.69851	-1.62517	-1.79618	-1.35755	-3.08256	-3.74729	-5.40282	-3.56788	-3.97633	-5.2791	-3.99044	-4.66762	-5.6206	-4.27882	-4.82017	-4.43916	-2.23232	-3.46906	-4.84058	-4.67426	-4.64281	-5.08205	-4.37123	-5.37859	-3.5535
188	1.23477	0.788787	2.97346	5.85607	3.76123	5.49617	6.12224	8.39108	6.6113	188	-2.28633	-1.32016	-2.49385	-1.75863	-2.41613	-1.50259	-2.79175	-4.03884	-5.6764	-3.5346	-3.7087	-4.87241	-3.7284	-4.48382	-5.45113	-4.53565	-5.23319	-4.02477	-2.04448	-3.46153	-4.2313	-4.02591	-4.23857	-5.26997	-3.95814	-4.90586	-3.21436
189	0.577012	-0.372036	0.132341	6.52576	1.75547	3.33789	6.56195	8.98836	6.84305	189	-2.37828	-1.47788	-2.50357	-1.7674	-2.20248	-1.11787	-3.32057	-4.0521	-5.8399	-3.19455	-3.8229	-5.04275	-3.89325	-4.59127	-5.4059	-4.09705	-4.57252	-4.1781	-2.74344	-2.94021	-3.82219	-4.50561	-4.83364	-5.15073	-3.96398	-5.19788	-3.63184
190	2.85121	2.15459	-0.381642	4.08406	3.16914	3.90323	6.39623	8.64803	7.49991	190	-2.05676	-1.63971	-2.57748	-1.43003	-2.0328	-1.43998	-2.98961	-4.30172	-5.93808	-3.64195	-3.52869	-4.96506	-4.0605	-4.66423	-5.95797	-5.71478	-4.58274	-3.80562	-3.42985	-2.84012	-4.32151	-4.31494	-4.2676	-5.23391	-4.19631	-4.90679	-3.74382
191	0.164418	1.62158	-1.2666	6.45467	3.54464	5.23934	6.33365	6.45402	6.63844	191	-2.05652	-1.16203	-2.22029	-1.40684	-2.51218	-1.4776	-3.35123	-3.96428	-6.32682	-3.49429	-5.2482	-5.08143	-4.28484	-4.4201	-5.87759	-5.88186	-4.51028	-3.66691	-2.43833	-3.11896	-4.58469	-4.16857	-4.46022	-4.58356	-4.09685	-4.96785	-3.64823
192	0.924033	1.34351	3.25204	5.16735	2.66759	4.69878	7.90905	9.22225	8.04209	192	-2.21523	-2.40183	-2.83223	-1.37124	-2.04283	-1.37151	-3.24619	-4.15491	-6.01914	-5.12982	-5.19701	-5.12451	-3.64885	-4.78467	-5.87904	-5.38133	-6.32742	-5.13872	-2.49281	-2.88343	-4.21647	-3.98099	-4.31065	-4.74275	-3.70156	-5.24989	-3.1175
193	-0.662015	1.91323	3.04459	6.52881	2.94158	4.63429	7.01189	7.97184	8.38698	193	-2.10723	-2.17302	-2.52724	-1.40795	-2.18169	-0.714645	-3.28041	-3.98842	-6.13551	-5.19236	-5.54817	-4.93797	-3.91389	-4.33749	-6.09789	-5.51299	-6.98101	-5.05214	-2.75334	-5.05944	-3.86307	-4.01036	-4.94993	-4.96332	-4.1915	-4.73371	-3.54067
194	2.69475	1.31339	2.23824	3.23897	1.95737	5.92162	8.08858	6.38948	8.1924	194	-2.448	-2.33124	-3.04217	-1.29806	-2.30599	-1.52767	-2.91132	-4.10182	-5.97505	-4.93384	-5.37082	-4.61119	-3.38223	-4.25865	-6.45072	-5.92082	-6.65059	-4.82987	-3.41688	-4.25476	-4.00476	-4.40641	-4.14968	-4.71265	-4.03829	-4.40823	-5.4169
195	4.85275	2.32803	1.73813	4.15436	3.46163	4.5343	7.54505	7.08513	6.6179	195	-2.40519	-2.41325	-2.60631	-1.41512	-2.03852	-1.02298	-3.23428	-4.30987	-6.14059	-4.92987	-4.73082	-5.10004	-3.86655	-4.24889	-5.88174	-5.19188	-5.89601	-4.49475	-3.72846	-4.41627	-3.37068	-4.26238	-5.64012	-4.25764	-3.91999	-4.9417	-5.20115
196	-0.437496	-1.76022	3.83595	4.46596	4.64912	4.08404	7.5185	8.37964	7.55324	196	-2.32757	-1.78103	-2.7468	-1.33403	-1.66645	-1.28927	-3.43005	-3.95191	-6.00188	-5.20045	-4.8874	-4.91134	-4.19379	-5.58932	-6.38424	-5.41161	-5.76258	-4.3438	-3.55712	-4.1885	-3.78575	-4.12971	-5.44717	-4.7166	-3.64778	-4.71264	-5.20306
197	-1.5545	1.41062	2.36332	5.07169	1.43524	4.98034	6.82056	9.24634	8.14833	197	-2.71658	-1.98021	-2.56849	-0.719768	-2.62264	-1.35572	-3.42287	-4.4097	-6.29471	-4.68936	-4.60993	-4.55877	-3.93735	-5.60078	-6.23602	-5.29264	-5.23677	-4.3947	-3.73604	-4.04452	-4.28845	-4.01571	-5.42331	-6.12497	-3.68208	-4.69105	-5.00217
198	1.55218	-0.269714	1.41452	1.93507	1.90602	3.60162	7.83963	6.66745	6.637	198	-2.54808	-1.70349	-2.25191	-1.10628	-2.25618	-1.00727	-3.9095	-4.52391	-6.2622	-4.77789	-4.77911	-5.23105	-3.92387	-5.94588	-6.25097	-6.10385	-5.1426	-4.14844	-3.42706	-3.63354	-3.18673	-3.88142	-4.84665	-5.41796	-3.76326	-4.62386	-4.86389
199	1.45092	0.65237	2.39168	2.7356	3.06905	3.14081	4.7969	9.4491	6.35618	199	-2.74351	-2.38694	-2.57857	-1.29599	-2.36902	-1.25501	-3.32731	-4.21874	-6.4137	-4.92719	-4.05553	-4.62182	-3.85642	-5.62749	-5.96361	-6.16656	-5.39657	-5.98448	-3.58115	-3.68873	-3.52156	-3.96081	-5.20896	-5.78713	-4.05145	-4.92971	-5.13654
200	1.04026	0.11171	1.63644	3.60412	2.94609	3.25031	6.24875	8.1571	7.25707	200	-2.24499	-2.23498	-3.14031	-1.24443	-2.44121	-0.431694	-3.70051	-4.20477	-6.72038	-5.25307	-4.61992	-4.98171	-4.23681	-6.25903	-4.79593	-6.76543	-5.11588	-4.36899	-3.24638	-3.545	-3.23739	-3.81126	-5.40505	-5.9411	-4.00308	-4.67257	-5.0478
201	-1.14344	3.4375	1.24364	4.59751	3.9545	2.64026	6.39308	7.89955	6.08712	201	-2.52033	-2.36234	-3.20282	-2.10191	-2.12677	-0.4171	-3.87499	-3.65644	-6.34736	-6.17527	-5.2198	-5.51891	-4.27816	-4.072	-4.58374	-6.38034	-6.12959	-4.20708	-3.84894	-3.29724	-3.19298	-4.29554	-5.12466	-4.40514	-3.81602	-4.80955	-5.16249
202	-0.296564	-0.181818	-0.783717	3.32276	3.54776	3.26862	6.29203	7.51771	6.60687	202	-2.59233	-2.13982	-2.56866	-1.41725	-2.48809	-0.863608	-3.68538	-4.41108	-6.75213	-4.0354	-4.80259	-5.50081	-4.17575	-4.43042	-6.53785	-6.5357	-5.9769	-3.95464	-3.51324	-3.55036	-3.82243	-3.92632	-5.55197	-4.43335	-3.90057	-4.90545	-5.05855
203	1.62309	1.45096	3.51094	4.09589	0.304827	4.19504	5.43236	7.63218	6.56878	203	-2.63781	-1.81749	-2.89239	-0.99993	-3.3188	-0.206309	-3.19466	-4.38478	-6.72786	-3.82414	-4.37631	-5.74408	-3.96434	-4.53716	-6.36331	-6.78287	-5.79838	-4.21695	-3.48805	-3.11667	-3.68566	-4.64154	-5.26908	-4.50722	-3.87818	-6.18185	-4.93426
204	3.94842	1.2839	3.38276	4.25031	2.20957	2.8725	5.94184	5.51696	6.6768	204	-2.94094	-2.03931	-2.82482	-1.02964	-2.53216	-0.61274	-3.46602	-4.71389	-6.76811	-3.81734	-4.81327	-5.93162	-4.09502	-4.0993	-6.36524	-7.06122	-6.10056	-4.40525	-3.74724	-3.92604	-3.36633	-4.08619	-5.34363	-4.54129	-3.93275	-5.57816	-4.56679
205	0.901043	1.76687	3.96596	4.34178	1.75061	4.09853	4.43029	8.37713	6.4061	205	-2.63997	-1.95644	-2.84045	-1.19375	-2.47914	-0.235026	-2.92831	-4.10338	-6.99536	-3.83367	-5.40813	-5.93328	-4.49561	-4.50775	-4.60235	-6.94335	-5.89302	-3.85299	-3.10145	-3.5931	-3.3817	-4.26018	-5.45954	-4.28514	-4.08725	-5.7145	-4.88846
206	3.59694	1.53592	3.69933	5.81759	1.95917	1.32005	5.92338	5.82779	5.85118	206	-2.71712	-1.76459	-2.46073	-0.936823	-2.3664	-0.482048	-3.69172	-4.18618	-6.7627	-3.62318	-4.98998	-5.47237	-4.27309	-5.83388	-4.42482	-6.5521	-5.13478	-4.10478	-2.85128	-2.62092	-3.12338	-4.29499	-5.55618	-4.06922	-3.62417	-6.08406	-4.63909
207	4.86239	-0.398148	2.83893	4.0523	2.71159	3.84146	4.55279	7.45117	5.8666	207	-2.84536	-1.74968	-2.85715	-0.525636	-2.0465	-0.867524	-3.29971	-4.63636	-6.44156	-3.69003	-4.91565	-5.79303	-4.66528	-5.82514	-4.5064	-5.51074	-5.40971	-6.06088	-3.08077	-2.94481	-2.76331	-3.77104	-5.78104	-4.40837	-5.43695	-6.26414	-5.16065
208	2.75001	0.103482	1.34366	2.96742	4.47398	3.68028	4.1352	5.31995	4.78799	208	-2.68115	-1.50945	-3.05167	-0.905336	-2.41173	0.0561836	-3.99269	-4.39053	-6.30721	-3.67901	-4.42332	-5.62565	-5.01248	-5.60951	-4.38712	-7.11574	-5.98592	-5.69595	-3.10754	-2.46329	-2.88906	-3.92406	-5.74586	-3.97973	-5.26165	-6.00355	-4.66543
209	2.705	3.22775	1.19924	3.3816	2.04495	3.87603	6.42404	6.58405	4.24027	209	-2.62539	-1.47618	-2.60807	-1.00289	-2.35723	-0.136054	-3.74671	-4.47246	-6.15139	-3.84626	-4.95213	-5.63137	-4.57201	-5.24449	-4.83171	-7.13299	-4.96316	-5.63455	-2.58154	-3.04226	-4.2396	-4.18132	-4.69857	-4.7497	-5.30362	-5.92293	-5.20545
210	1.63049	1.48015	3.95259	3.90969	0.470206	3.79327	4.33868	6.42313	4.67326	210	-2.31493	-1.18184	-3.19129	-1.27398	-2.36826	-0.651709	-3.36759	-4.20435	-6.31194	-3.49141	-5.29428	-5.53145	-5.0554	-5.60004	-4.9021	-7.14196	-5.45204	-5.25956	-2.14702	-2.96359	-3.83832	-4.07638	-5.31049	-4.35712	-5.22887	-5.46262	-4.9858
211	3.35125	2.01004	2.56373	1.60157	1.34385	3.20748	4.34919	7.43396	4.6752	211	-2.4016	-1.40259	-2.33676	-0.963755	-1.94271	0.0120405	-3.78816	-4.23338	-6.23925	-3.59675	-5.0457	-5.83762	-4.55382	-5.17182	-4.64666	-7.4443	-5.29291	-5.03337	-3.1114	-4.1977	-4.44282	-3.8343	-5.66151	-4.81853	-5.33636	-6.15366	-4.99784
212	0.446864	2.43767	4.35352	3.9556	2.59345	4.32613	3.88225	7.21683	4.39089	212	-2.6988	-1.54918	-2.51642	-0.914368	-1.95413	0.0183669	-3.46506	-4.51532	-6.61901	-4.11047	-4.58487	-5.39497	-4.87477	-5.45465	-4.42743	-5.67686	-6.77985	-4.73442	-2.97525	-3.25882	-4.42293	-3.80943	-4.56056	-4.30524	-5.24586	-5.58661	-5.06545
213	2.90002	0.869027	-2.75308	0.41979	2.3639	2.92163	4.70233	5.85689	5.67332	213	-3.11159	-2.16465	-2.43953	-0.123519	-1.97154	-0.0692458	-4.01752	-4.73214	-6.75273	-3.54892	-5.31771	-5.83998	-5.33544	-5.28761	-4.24946	-6.74632	-5.97685	-4.72438	-2.73819	-3.48587	-4.17339	-3.61891	-4.62735	-4.2387	-5.6815	-5.86045	-4.92228
214	-1.32019	0.530191	3.79243	3.12761	1.16512	2.86181	5.33012	6.67193	4.80134	214	-2.57662	-2.603	-2.59958	-0.953051	-2.48749	-0.687186	-4.12502	-4.43399	-6.3489	-3.7086	-4.48293	-5.49293	-4.80643	-5.11487	-3.99368	-7.12276	-5.56635	-4.99209	-2.92579	-3.15734	-3.44767	-4.06694	-4.44994	-4.34788	-4.76879	-6.22793	-4.68655
215	1.1253	0.545513	3.03749	2.26036	1.29803	2.57002	2.88781	6.46295	5.52262	215	-2.67555	-2.46695	-2.23899	-0.576374	-2.13128	-0.585175	-3.8844	-4.25508	-6.47217	-3.58881	-4.72649	-5.02695	-4.09433	-4.82329	-5.68299	-7.67259	-6.26781	-3.98725	-3.06329	-2.88966	-3.60543	-4.16343	-4.43644	-4.13467	-4.76086	-6.3218	-5.11461
216	3.53045	1.17948	4.69106	1.42392	-0.414907	1.09158	3.26473	3.11506	3.85188	216	-2.47222	-2.12017	-2.78865	-0.809095	-1.82118	-0.147094	-3.70711	-4.23968	-5.74302	-3.92034	-4.44153	-5.18686	-4.22063	-4.32388	-3.67691	-7.15659	-5.62584	-4.52109	-2.52883	-2.92272	-3.88292	-4.32505	-4.33555	-3.76212	-5.33076	-6.43547	-4.68312
217	1.56225	0.825651	3.84595	3.82805	0.685625	2.65742	2.81181	5.28037	3.67913	217	-1.99501	-1.82703	-2.06709	-0.382226	-1.72787	-0.558629	-3.86966	-4.32092	-6.27424	-3.35433	-4.46428	-5.25056	-4.43548	-4.19486	-3.35565	-7.5518	-5.7522	-4.1594	-3.268	-2.88554	-3.28786	-3.90099	-4.31076	-3.30534	-5.27537	-6.1121	-4.74534
218	2.98435	0.675993	1.30752	2.31666	2.58485	2.54024	3.45738	4.2333	1.90138	218	-2.00768	-2.05995	-1.88716	-0.575819	-2.13929	0.566815	-3.90893	-4.22202	-5.84447	-3.57588	-4.08555	-4.45795	-3.96473	-4.32748	-3.84624	-7.14146	-5.39953	-3.83839	-2.90748	-2.11723	-2.91091	-3.99921	-4.09094	-3.71801	-4.85442	-6.14078	-5.03198
219	2.61667	-1.1724	2.90107	2.00932	-1.3428	0.265792	1.84071	4.12325	3.55494	219	-2.45143	-2.0222	-2.17516	-0.885108	-2.14763	0.526384	-3.97923	-3.90002	-6.42762	-3.53958	-3.51722	-5.16384	-4.25608	-4.13112	-3.38183	-7.06804	-4.95187	-3.69363	-2.74972	-1.64228	-3.28376	-4.28664	-4.85127	-3.43387	-5.17004	-5.90679	-5.41221
220	1.51806	1.27331	1.4997	3.20629	-0.842714	3.32677	4.4303	4.30884	3.32594	220	-2.28894	-1.85896	-1.76494	-0.28836	-2.25096	-0.484626	-3.83524	-3.72824	-6.16654	-3.46197	-3.62044	-5.15115	-3.64595	-3.90406	-2.88411	-6.87641	-5.13086	-3.26767	-2.25941	-1.58579	-2.35291	-4.13101	-4.66193	-3.54774	-5.32028	-5.63162	-5.35286
221	2.66038	-0.780423	-0.86124	1.83719	0.0561912	1.03007	4.63816	3.5145	3.62866	221	-2.49545	-2.29111	-2.35804	-0.082711	-1.98021	0.313333	-3.55932	-4.01449	-6.46754	-3.29165	-4.09874	-3.03424	-3.54083	-3.74337	-2.98309	-6.61103	-4.6806	-2.68165	-3.07245	-2.02088	-2.17107	-3.82468	-4.49809	-2.99241	-5.75486	-5.83611	-4.66411
222	-0.411695	2.84354	2.2358	-0.987187	0.541447	4.99279	1.56579	4.73574	3.76132	222	-2.50726	-1.25761	-1.93077	0.0986075	-1.51989	0.384891	-2.82292	-3.74731	-5.62304	-3.23472	-3.53701	-3.01703	-3.38257	-3.83498	-3.00725	-6.5418	-4.30016	-4.99596	-2.72057	-2.21918	-2.15003	-3.31532	-4.15117	-2.76718	-5.17147	-6.03846	-4.51234
223	0.683322	0.562423	1.03141	1.3144	0.51873	2.90815	1.53797	3.48346	3.30657	223	-2.47181	-1.19001	-2.59251	-0.236488	-1.73407	-0.0247128	-3.06314	-3.47234	-5.72742	-2.99168	-3.44481	-2.88868	-3.49275	-3.92567	-3.13714	-6.01132	-4.21633	-4.47121	-2.38236	-2.96205	-2.14674	-4.95211	-4.31531	-2.71465	-5.44975	-5.33834	-4.59549
224	0.8087	-0.730301	1.29157	2.86733	0.141553	2.50118	2.33815	4.67061	3.52503	224	-1.68408	-1.0721	-1.95113	-0.583484	-1.67048	0.365513	-2.96347	-4.04688	-5.87178	-2.70558	-3.60927	-2.2493	-3.51256	-2.88722	-2.84636	-6.59449	-3.78218	-3.79149	-2.38817	-3.1009	-1.90569	-3.96913	-4.16075	-3.10238	-4.94967	-5.83641	-4.56294
225	0.155755	1.58231	1.08036	0.791332	3.06857	3.64274	1.57458	3.47924	3.14467	225	-2.06631	-1.19907	-2.32707	-0.0694991	-1.79446	0.0589569	-3.15233	-3.2603	-5.66137	-2.97698	-2.95342	-2.57473	-3.37102	-3.2891	-2.37361	-6.00877	-3.58591	-3.73434	-2.32547	-2.30154	-2.15571	-4.43586	-4.41594	-2.65552	-5.04905	-5.68348	-4.51942
226	0.671447	0.90634	1.38313	1.45969	1.39753	1.38387	3.11214	4.4086	3.63158	226	-1.93473	-0.941782	-1.94022	-0.27989	-2.15131	-0.0897756	-2.72241	-3.43152	-5.74409	-2.32344	-2.58808	-2.85602	-3.17952	-2.85304	-2.81704	-6.11092	-3.69576	-3.29395	-1.98084	-2.74985	-1.33634	-4.57637	-3.80335	-3.18218	-5.27746	-5.71391	-4.24821
227	1.87657	1.59712	1.9064	-0.0856229	-0.613613	1.45319	2.75823	2.82822	1.909	227	-2.01447	-1.53353	-2.081	0.423671	-2.18597	-0.539172	-2.95452	-3.46122	-5.35956	-2.57362	-2.286	-2.32885	-3.33006	-2.60825	-2.56164	-5.85376	-2.95703	-3.17035	-1.83837	-2.4803	-2.86153	-4.38238	-4.22333	-2.8179	-5.46115	-5.80243	-4.63138
228	0.908442	1.90669	2.00199	0.559646	0.893908	2.03789	3.03013	2.31512	1.47141	228	-1.97534	-1.77927	-2.28698	-0.235246	-1.5924	-0.199779	-2.6455	-3.51589	-5.77211	-2.58736	-2.38597	-1.86945	-3.17849	-2.61094	-1.92771	-5.66731	-3.00609	-3.15648	-2.4513	-2.23494	-3.30184	-4.12584	-4.11953	-2.46736	-4.75434	-5.90946	-4.28135
229	1.74924	-0.13124	2.0925	0.608767	-0.384037	2.9978	2.69003	4.82303	2.35688	229	-2.5895	-1.20338	-1.80707	0.496982	-1.82025	-0.191751	-2.89127	-3.12648	-5.66206	-4.13451	-2.38366	-2.44301	-2.93645	-2.67837	-1.88403	-5.08999	-2.69642	-2.52889	-2.41021	-1.83555	-3.11608	-3.6886	-3.77883	-2.3314	-4.78485	-5.249	-4.4064
230	1.44371	-1.18791	1.63087	0.218936	3.02831	2.9291	-0.102657	3.07757	1.7685	230	-1.94833	-0.899182	-1.73584	0.0329385	-1.11404	0.113662	-2.50824	-3.22226	-5.1399	-2.41987	-1.93031	-2.28772	-2.65577	-2.56278	-1.91826	-5.69255	-4.87097	-2.48121	-1.40543	-1.41608	-2.8362	-4.27465	-3.94487	-3.57896	-4.77529	-5.26117	-4.1261
231	-0.301291	0.951924	2.44008	0.894984	-0.63579	1.19726	2.3719	4.26958	1.66995	231	-2.07587	-2.19082	-2.10003	0.587645	-1.08456	0.349608	-2.84516	-3.2447	-5.24315	-4.1551	-2.35924	-2.16809	-3.02696	-1.86058	-1.93711	-4.53603	-4.50003	-2.42824	-2.18332	-1.20987	-2.74547	-3.77864	-3.82575	-3.79259	-4.33207	-5.1338	-4.51592
232	-0.55286	-1.92286	1.38972	0.290391	-1.25763	0.269501	2.04239	2.46935	0.472457	232	-2.31653	-1.7517	-1.58882	0.894489	-1.02027	0.488089	-2.27509	-2.71359	-5.26897	-3.91904	-2.13872	-1.89804	-2.92062	-2.22863	-1.86547	-5.23384	-4.04307	-2.47208	-1.61865	-0.965954	-1.96713	-3.67702	-3.47596	-3.74585	-4.23043	-4.99397	-4.13897
233	0.579784	0.843928	2.79553	1.52408	0.492531	1.83806	0.386849	3.19096	0.45513	233	-2.40819	-1.86224	-2.34104	0.681488	-1.09502	-0.131987	-2.38451	-3.10865	-5.37604	-3.40906	-2.11131	-2.15565	-2.7186	-1.99655	-2.00081	-4.96426	-3.69901	-2.12153	-1.49328	-0.91809	-2.00654	-3.52337	-3.28577	-3.51167	-4.34397	-4.87332	-3.80143
234	-2.24761	0.393592	1.8204	-2.48574	1.55286	2.1719	1.44587	1.53322	1.20091	234	-2.40307	-1.60169	-2.23882	0.647626	-1.32534	0.801538	-2.13279	-2.86887	-4.9149	-3.33149	-1.67824	-1.48743	-3.07382	-2.14874	-2.29656	-4.50345	-3.71975	-2.21439	-1.50063	-0.991874	-1.53928	-3.54878	-3.55911	-3.71054	-4.64069	-4.8892	-4.44069
235	3.07823	1.60704	-2.72175	-0.185995	1.63501	1.34251	1.87566	3.68144	1.69545	235	-2.41838	-2.0495	-1.76389	0.494419	-1.30602	0.740224	-2.01144	-2.38998	-4.79039	-3.31066	-1.75665	-1.62888	-2.62544	-1.78643	-2.06325	-4.43218	-3.55619	-1.79178	-1.84711	-0.248715	-1.26961	-3.56172	-3.529	-3.36068	-4.38809	-4.80261	-4.16112
236	0.219164	-0.626227	2.98722	0.406346	1.51952	1.22313	1.95593	2.61244	1.13175	236	-1.99357	-1.40403	-1.40803	1.06899	-1.26972	0.00147882	-2.13777	-2.38006	-4.6862	-3.62658	-1.36882	-2.17386	-2.50538	-1.61262	-1.77024	-4.64321	-2.73709	-1.51691	-2.28038	-1.26339	-1.42002	-3.50631	-2.97962	-3.57626	-3.73188	-4.54732	-3.90307
237	-0.247152	-0.632571	0.135293	1.19874	0.952827	0.680523	0.749105	2.89062	2.12179	237	-2.03273	-1.2425	-1.61376	0.482488	-0.9859	0.0164265	-2.38195	-2.41024	-4.73597	-3.45196	-1.7884	-1.92542	-2.85759	-1.7662	-1.91204	-4.27445	-3.17049	-3.23766	-2.01152	-1.051	-1.17983	-3.09036	-3.10519	-3.85575	-4.19322	-4.4145	-3.88971
238	0.815499	-0.494947	2.00541	-1.50498	-0.180094	-0.100146	-0.799073	2.56422	2.98215	238	-1.98786	-0.732903	-1.78592	0.331227	-1.03462	-0.481543	-1.65289	-2.30166	-4.69139	-3.24272	-1.59658	-1.52209	-2.87804	-1.12135	-1.57237	-4.32541	-2.96271	-2.3946	-1.84112	-1.32615	-0.685758	-2.88621	-2.77344	-3.02705	-4.56278	-4.4542	-3.68789
239	-1.08823	-0.0851989	0.334187	-0.80749	0.764451	-0.071934	1.99452	4.78336	0.701703	239	-2.62384	-0.91939	-1.68022	0.249088	-1.09266	0.20123	-1.54515	-2.90441	-4.67001	-2.98928	-1.66913	-1.18763	-2.61221	-1.06044	-1.66639	-3.77469	-2.44314	-2.61212	-2.38371	-1.04424	-1.0641	-3.0736	-3.08946	-3.25078	-3.7891	-3.81511	-4.0873
240	0.134419	1.55943	-0.0316258	2.92807	-0.851031	1.99936	0.977011	3.68512	2.20439	240	-2.193	-1.05807	-1.8175	0.835187	-1.05236	0.288178	-1.80835	-2.02031	-5.06531	-3.2939	-1.64679	-1.38998	-2.84899	-1.02511	-1.55983	-3.75292	-2.75061	-1.797	-2.01733	-0.73454	-1.17234	-3.06345	-2.82938	-3.13702	-3.54293	-4.45212	-4.15354
241	-0.48319	0.160441	2.25377	-0.560405	-2.34909	1.67458	1.94676	4.17506	2.00395	241	-1.7671	-0.754303	-1.74537	1.05299	-1.22635	0.377297	-1.9382	-2.43689	-4.45123	-2.88212	-1.46673	-1.35792	-3.03198	-0.64486	-1.5999	-5.44671	-2.70936	-2.26619	-2.10974	-0.870226	-2.02652	-2.65358	-3.14865	-3.12368	-3.74936	-4.42218	-3.47212
242	3.16752	1.19651	1.89798	-1.32163	-0.661704	2.35484	1.6904	1.31921	1.14058	242	-1.85256	-0.512583	-1.85545	1.59496	-0.631372	0.216107	-0.987344	-2.88335	-4.49396	-3.44229	-1.12433	-1.5703	-2.77932	-1.09722	-1.60438	-5.25854	-2.4891	-1.73096	-2.18039	-0.221213	-1.91332	-2.66603	-2.58477	-2.85062	-3.77752	-4.11243	-3.65606
243	1.39392	-1.03035	2.01797	1.97312	1.74387	1.15074	2.79297	2.07212	1.77546	243	-1.79875	-0.539627	-1.14577	0.520569	-0.960409	0.272274	-1.58217	-2.48183	-5.15087	-3.01313	-1.58088	-1.02662	-2.84712	-0.853611	-1.4552	-4.66095	-2.08574	-2.08438	-2.08915	-0.135547	-2.02609	-2.49535	-3.01913	-3.04073	-3.64329	-4.02866	-3.37951
244	-0.936217	0.785828	-0.317018	-0.285293	0.568686	1.11751	1.63243	3.47981	0.597937	244	-1.92307	-1.57233	-1.08409	1.27138	-0.696926	0.3716	-1.47116	-2.78544	-4.65245	-3.05426	-1.41337	-1.14104	-2.85818	-0.739968	-0.94316	-4.81957	-2.45659	-1.72325	-2.04536	0.539338	-1.81257	-3.22013	-2.3248	-3.55954	-3.4561	-4.07214	-3.59281
245	-0.146556	-0.835284	0.629622	-1.09974	0.879621	1.73484	2.0609	2.80115	1.74978	245	-2.13289	-1.68333	-1.52974	1.10533	-0.595452	0.256458	-1.20654	-2.32632	-5.09359	-2.74035	-1.47013	-1.69223	-2.94407	-0.263626	-1.11307	-5.20263	-1.53242	-1.78443	-1.80974	-0.928104	-1.54905	-2.9809	-2.3134	-2.77826	-3.73804	-4.06093	-3.31648
246	-0.454699	-3.54522	3.77515	-0.340475	0.879439	3.13739	-0.0182613	2.15564	1.77069	246	-1.87608	-0.771616	-1.33068	0.663768	-0.666919	0.172593	-1.48861	-2.51573	-4.57354	-2.74475	-0.495653	-1.27426	-2.72844	-0.484647	-0.884675	-4.78246	-2.22655	-1.98966	-1.91712	-1.82314	-1.61212	-3.54424	-2.29346	-3.05568	-3.18733	-4.18262	-3.66362
247	-0.565575	1.59281	0.148348	-2.54187	-0.107581	1.974	2.15436	3.77953	1.30464	247	-2.01256	-1.12232	-1.28688	0.733914	-0.772181	0.134546	-1.43003	-1.85311	-4.8844	-2.67489	-0.903074	-1.7118	-2.69323	-0.271066	-0.713704	-4.78937	-1.19496	-1.74306	-2.17584	-1.08885	-1.06572	-3.51824	-2.33051	-3.22659	-3.43419	-3.87105	-3.77324
248	1.90668	0.10637	3.36216	-0.210558	-0.881355	3.41377	2.23113	3.02375	1.55315	248	-2.10126	-1.20203	-1.69955	1.12005	-0.733296	0.376234	-1.55426	-2.07789	-4.86892	-2.7888	-1.02525	-1.28951	-2.5658	-0.156705	-1.18332	-4.20209	-1.28008	-1.72638	-1.9491	-0.720741	-0.76237	-2.94816	-2.71831	-2.90919	-2.95846	-3.61476	-3.10443
249	-1.80579	1.27608	-0.0643751	-1.44763	-0.468258	1.38965	-0.782944	3.33503	1.97901	249	-1.55308	-1.48932	-1.25975	0.772878	-1.46769	-0.0290634	-1.24345	-2.09322	-4.69536	-2.72124	-0.881416	-1.09253	-2.67578	-0.426773	-1.23906	-3.94624	-3.60821	-0.98481	-1.77976	-0.979321	-1.15221	-3.01062	-2.57117	-2.85731	-3.1706	-4.02621	-3.4262
250	1.14017	-0.257455	3.82042	-3.37501	0.904919	-0.131625	1.93508	4.18033	2.97527	250	-1.39795	-0.856802	-1.68177	1.0148	-0.555318	-0.184867	-1.75538	-2.15684	-4.75816	-2.49189	-0.826827	-1.31268	-1.75139	-0.404611	-0.958637	-4.10643	-3.19414	-0.799922	-1.83173	-0.835059	-0.975606	-3.23348	-2.26711	-2.90025	-3.27439	-3.52902	-3.52983
251	0.0385223	-1.12145	1.82657	-1.62992	-1.73812	1.40632	0.951417	4.63077	1.83453	251	-2.03565	-0.769982	-1.16394	1.06793	-0.838271	0.170183	-1.03314	-1.76623	-4.62275	-2.47025	-2.40177	-0.655297	-2.06447	-0.0414819	-1.42121	-4.22841	-2.94934	-0.750273	-1.94728	-0.53609	-0.627702	-2.6773	-2.05887	-2.8144	-3.42764	-3.74632	-3.10956
252	0.124681	-1.53906	1.88794	0.66836	-0.598507	2.23626	1.72079	2.82981	1.32274	252	-1.75455	-0.599786	-1.25395	-0.543957	-0.154162	0.38062	-1.41123	-2.16695	-4.47952	-2.3685	-2.102	-1.19937	-2.19171	0.0556587	-1.00208	-3.19678	-3.21396	-0.591163	-1.8585	-0.370171	-0.360369	-3.39597	-1.99693	-2.40327	-3.15666	-3.43894	-3.01209
253	-0.443595	0.419414	-1.91165	-1.87121	-0.00768153	2.44249	0.938406	1.38873	2.49451	253	-1.80486	-0.373738	-1.05252	1.18771	-0.676735	0.973521	-1.24345	-1.89359	-4.35236	-2.53881	-1.92544	-0.920387	-2.7009	-0.230758	-0.578316	-4.91055	-2.80493	-0.482834	-2.36051	-0.751836	-0.369052	-2.5469	-2.04639	-2.90859	-2.98183	-3.5711	-2.63716
254	-3.20913	1.76637	0.274168	-1.14495	-1.40838	2.64457	1.15643	2.32224	1.03393	254	-1.94153	-0.915334	-1.11077	1.03593	-0.702467	-0.0888629	-0.859382	-1.51468	-4.29262	-2.24673	-1.71255	-0.850315	-2.86315	-0.378542	-0.643021	-4.93272	-2.43293	-2.01253	-1.56231	0.10061	-0.239058	-2.70048	-2.23338	-2.56869	-2.9217	-3.3886	-3.22607
255	-1.7443	1.17925	1.69708	-1.2747	0.497008	2.68736	0.799845	3.88567	1.60771	255	-1.92446	-1.02194	-1.3809	-0.412549	-0.406354	0.9219	-1.38096	-1.75069	-4.51301	-2.06512	-1.4941	-1.29668	-2.83257	-0.191765	-0.454885	-4.48071	-2.29921	-1.59576	-1.67429	0.228295	-0.271115	-2.68202	-2.20047	-2.57527	-3.40435	-3.07733	-2.84594
256	1.88763	0.6947	2.95903	-0.228914	-0.543859	1.55642	2.96222	1.87162	1.8347	256	-1.67849	-1.02611	-1.26808	0.214304	-0.407153	0.615104	-0.83962	-1.7077	-3.99405	-2.30529	-1.55154	-0.985444	-2.67018	0.116425	-0.394472	-4.13947	-2.27518	-1.72589	-1.83303	0.0258676	-0.484495	-2.96436	-2.23207	-2.08794	-3.02757	-3.04034	-3.13405
257	0.426936	0.931849	1.92034	-0.532904	-0.273118	2.11898	0.0398758	3.24228	0.982958	257	-1.74342	-0.554642	-0.947978	0.665901	-0.222486	0.136956	-1.36386	-1.51787	-4.278	-2.48289	-1.57975	-1.20434	-2.65213	-0.831992	-0.736172	-4.54896	-1.71456	-1.7715	-2.01533	0.112109	-0.47796	-2.69184	-1.87669	-2.52124	-3.28754	-3.7287	-3.00866
258	-2.14931	1.83071	-1.42347	0.445798	-2.04239	0.1267	1.94239	2.16313	1.37854	258	-1.6922	-0.562057	-1.09274	0.252947	-0.507239	-0.080286	-1.05806	-1.49787	-3.74287	-2.51439	-1.6236	-0.685142	-2.39308	-1.01504	-0.117862	-3.83122	-1.47874	-1.98717	-1.645	-0.146806	-0.26043	-2.5301	-1.51721	-2.26944	-3.1273	-2.92358	-2.84817
259	0.315611	1.15948	1.6523	-1.85402	2.4689	1.57428	0.631608	4.17282	0.414668	259	-1.1483	-0.656798	-1.34051	0.0514633	-0.125032	0.33303	-1.42687	-1.73487	-4.63149	-2.24707	-1.05409	-1.14144	-2.37135	-1.23314	-0.0234567	-4.4918	-1.91078	-0.845728	-2.15171	-0.472798	-0.0844025	-3.07419	-1.42299	-1.63717	-2.82064	-2.85606	-2.73121
260	1.9782	-2.0021	2.20608	-3.12711	1.36195	0.238672	-0.09472	1.36594	1.94127	260	-1.46731	-0.236069	-0.744348	0.0701757	-0.291533	-0.0738001	-1.12644	-1.69742	-3.81677	-2.17467	-0.893278	-1.24311	-2.55808	-1.00485	-0.39886	-4.46392	-1.5996	-1.34549	-1.47418	-1.09819	0.332816	-3.49396	-1.68042	-2.11274	-3.11679	-3.33673	-2.47238
261	2.42009	2.59573	1.77337	-1.43022	-2.11177	1.52298	0.924721	3.50385	0.634863	261	-1.62155	0.192176	-1.33706	0.114468	-0.30339	0.757307	-1.59878	-1.69195	-4.09759	-2.31688	-1.01821	-0.724717	-2.50533	-1.14223	0.118248	-4.07027	-1.74653	-0.495282	-1.28453	-0.241049	0.508605	-3.26027	-1.61624	-2.06446	-3.17962	-3.03106	-2.60979
262	-1.14615	0.679439	1.63956	-2.33197	-0.631126	1.45017	-0.897835	2.13582	0.939675	262	-2.00271	-0.228172	-1.36426	0.435547	-0.578225	0.138896	-1.13155	-1.12031	-3.75117	-2.37123	-1.3547	-0.630468	-2.24697	-0.811128	-0.554353	-3.91562	-1.22344	-1.11032	-1.5473	-1.09484	-1.06248	-3.47512	-1.55154	-2.00596	-2.72955	-3.11732	-2.67984
263	-0.385624	2.21163	-0.968066	-2.03116	0.720747	-0.635489	-0.790642	3.4615	2.24671	263	-2.07997	-0.33116	-1.26987	0.461471	-0.46082	0.218641	-1.38179	-1.72996	-4.10364	-2.19119	-0.93246	-0.808182	-2.49176	-0.641007	-0.279865	-3.73591	-1.64848	-0.918425	-1.7078	-0.603693	-1.34379	-3.06548	-1.47968	-2.20005	-2.78696	-3.41616	-2.66951
264	0.592787	-1.57793	-0.482939	0.286174	0.0126178	1.87216	1.73331	1.7949	2.13206	264	-1.51914	-1.36576	-1.39155	0.027649	-0.0155801	0.677332	-1.15195	-1.45189	-3.78638	-2.61068	-0.907504	-0.709619	-1.84795	-0.538075	-0.392929	-5.37084	-1.09368	-0.349879	-1.27895	-0.33371	-0.286142	-3.25269	-1.49272	-1.78681	-2.67461	-3.38129	-2.17009
265	0.598257	-1.74308	1.12311	-1.513	-1.40863	2.68526	0.624754	2.09569	1.40329	265	-1.31922	-0.787341	-0.69714	0.430938	-0.151981	-0.168297	-0.902039	-1.4912	-3.68933	-2.58291	-0.651691	-0.871482	-2.1065	-0.935397	-0.703193	-5.67059	-1.91337	-0.616815	-1.7098	-0.515296	-1.2229	-3.4988	-1.38579	-2.17138	-2.62226	-3.31002	-2.56604
266	2.72516	-1.49473	2.08635	-1.70235	-1.01132	1.14222	1.21754	1.17065	1.23647	266	-1.94187	-0.890582	-1.41085	0.311343	-0.543997	0.218242	-2.15879	-1.67028	-3.70631	-1.84338	-0.468728	-0.105655	-2.00404	-0.540339	-0.503342	-4.96154	-1.62216	-0.457162	-1.21876	-0.197449	-1.36349	-3.04054	-2.05078	-1.90125	-2.67814	-2.99122	-2.76223
267	2.6957	-1.58427	0.903044	-4.43567	-1.41733	0.840157	0.744929	1.86538	1.65665	267	-1.86671	-0.401049	-0.299349	0.55415	-0.284991	0.510364	-1.94874	-1.38325	-3.29576	-2.58583	-0.723951	-0.445883	-2.27155	-1.16972	-0.0636681	-4.99111	-0.81955	0.195542	-1.53224	0.18182	-0.42081	-3.09132	-1.57982	-1.79835	-3.1632	-2.87531	-2.40159
268	1.5722	0.362468	1.30358	-0.981657	0.946009	1.55735	0.219155	2.56495	-0.15002	268	-1.6281	-0.554878	-1.12459	1.45043	-0.695592	0.579503	-0.950275	-1.49446	-3.63454	-2.15724	-2.40935	-0.860698	-2.49387	-0.190206	0.134062	-5.42953	-1.13497	0.216219	-2.08213	0.180096	-0.998314	-2.73288	-0.88233	-1.54377	-3.20863	-3.17134	-2.35683
269	3.35806	1.77041	2.80518	-1.37882	1.24351	-0.0933111	0.376242	3.28762	1.61798	269	-1.93027	-0.26506	-0.826386	-0.376593	0.220162	-0.0202383	-1.11155	-1.23141	-3.48308	-2.49735	-2.19154	-1.08707	-2.49117	-0.528897	-0.58227	-4.99143	-2.64083	-1.84486	-1.60154	-0.27612	-1.13813	-3.65244	-1.86685	-1.75837	-2.3372	-3.09283	-2.41162
270	-0.972393	-1.72638	0.458977	0.708728	1.64361	0.334509	1.76515	1.80442	0.772597	270	-2.2272	-0.161506	-0.940765	0.238079	-0.389508	0.0644505	-1.16119	-1.48065	-3.44715	-2.55198	-2.72271	-1.0033	-2.47991	-0.767856	-0.357491	-4.9008	-2.46862	-1.41455	-1.21922	-0.672973	-1.08876	-3.62865	-1.22619	-1.65314	-2.60698	-2.93434	-2.26934
271	0.510414	-2.48117	-0.134556	-1.76078	0.45135	2.14074	0.564957	2.4209	0.805374	271	-2.09043	-0.42878	-1.23847	0.40692	0.572455	0.241581	-1.69533	-1.15877	-3.23409	-2.6791	-1.70694	-0.755314	-2.42691	0.00671084	-0.168295	-5.01697	-2.8691	-1.11527	-1.65504	0.206351	-0.392617	-3.43637	-1.51218	-1.41592	-2.7207	-2.93386	-2.48572
272	1.73526	2.63591	-0.489766	-0.142141	-0.222922	-0.642293	1.60778	4.8288	2.08701	272	-2.32366	0.201295	-0.474743	0.023508	0.110586	0.846116	-1.57702	-1.30317	-3.67089	-2.52507	-1.59678	-0.917679	-2.37022	-0.248802	-0.408985	-4.50605	-2.59905	-0.915308	-2.12187	-0.686005	-0.145082	-4.08813	-1.74889	-1.92105	-3.07141	-2.65049	-2.15849
273	-2.49318	1.77902	0.844046	1.01916	-2.34086	1.76867	0.215796	1.87106	-0.948052	273	-1.92121	-0.638109	-1.00261	0.299349	0.026796	-0.125342	-1.87645	-1.16506	-3.87117	-2.41916	-1.37301	-0.58989	-2.52819	-0.169189	-0.344135	-4.49813	-2.48343	-1.38433	-2.09245	-0.539635	-0.402397	-3.05297	-1.37535	-1.44894	-2.43677	-2.35988	-2.14928
274	0.264881	-0.0860559	0.410215	0.361345	2.59269	1.03337	1.20814	1.31726	1.42713	274	-1.63994	-0.390127	-0.222548	0.866924	-0.507402	0.0844663	-1.98893	-1.29601	-3.52201	-3.0838	-1.37699	-0.70345	-2.75297	-0.172242	0.208265	-4.27666	-1.77486	-1.19329	-1.68498	0.0961541	-0.018905	-3.77331	-1.34692	-1.14443	-2.64282	-2.53755	-2.14792
275	1.56509	0.991589	2.06714	0.643618	-0.990029	-1.90068	0.50456	1.85555	-1.75378	275	-2.00792	-0.0582043	-0.343224	0.68441	-0.0219431	0.508025	-1.94512	-1.69922	-4.01744	-2.61935	-1.53776	-0.792432	-3.03685	-0.54481	-0.382322	-4.2427	-2.20074	-0.21914	-2.05396	-0.5198	-0.180669	-3.17815	-1.21535	-1.43635	-2.93096	-3.0127	-2.35678
276	-0.55738	2.19243	1.2123	-0.51708	1.16658	-1.47024	-0.020038	1.71207	2.00753	276	-1.97658	0.232355	-0.632746	0.524164	0.400646	0.398421	-2.10359	-0.821053	-3.76836	-1.97175	-1.60967	-0.980528	-2.98252	0.0709831	-0.75271	-4.56588	-2.04191	-0.245673	-1.42342	-0.0359865	0.729569	-3.98706	-1.58698	-1.27413	-2.71199	-2.34589	-2.28593
277	0.986526	0.373205	2.11282	-1.21923	0.938269	-1.49476	-1.27226	1.41887	-0.561277	277	-2.28614	-0.491703	-0.754473	0.564565	0.431282	0.815857	-1.91686	-1.14996	-3.59064	-2.23108	-0.881662	-1.06891	-2.65666	0.251713	-0.192451	-5.74521	-2.2894	-0.752219	-1.53298	-0.277079	0.443918	-2.93502	-1.67274	-1.59892	-2.98416	-2.89168	-2.00761
278	-1.9903	-1.37965	-0.397186	-2.14942	-0.460276	-0.139942	1.20782	0.63017	0.0376526	278	-1.88989	0.414871	-0.49651	0.626187	0.468536	0.481293	-1.79752	-1.15388	-3.44531	-2.45708	-0.566436	-1.0807	-2.15621	0.395901	-0.212894	-5.72939	-1.36108	-0.506424	-1.72867	-0.148004	-0.0208609	-3.48111	-1.26526	-0.939109	-2.50957	-2.49778	-1.80417
279	-2.9679	-0.132008	-0.405188	-1.85773	-1.44326	-1.73609	0.588536	2.76062	0.577234	279	-2.3233	-0.137578	-1.45761	0.616553	0.0938327	0.39158	-2.14789	-1.28699	-3.54557	-2.59249	-0.434567	-0.903384	-2.38974	-0.11125	0.340567	-5.23182	-1.75721	-0.700092	-1.85264	0.569139	0.151875	-3.46827	-1.38266	-0.82234	-2.47577	-2.8131	-2.03245
280	-0.3221	0.487405	-0.134427	-0.799286	-0.5484	-0.923541	-0.264266	1.93832	-0.0717843	280	-2.15379	-0.584503	-0.562162	0.606193	0.939965	0.313891	-2.12123	-0.749218	-3.23448	-2.50774	-0.797933	-0.409618	-2.82239	-0.0053456	-0.27514	-5.52659	-1.36122	0.173646	-1.19672	0.473411	0.20392	-3.83655	-1.07372	-0.639409	-2.65806	-2.8023	-1.88953
281	1.1591	-1.47294	-0.923343	-0.949294	-1.4074	1.30088	0.476497	2.83403	0.283787	281	-2.32583	-0.377824	-0.801421	0.424328	0.0975496	0.975975	-2.21212	-1.0592	-3.35066	-2.64568	-2.2703	-0.941203	-3.01118	-0.131144	0.0019045	-4.90584	-1.36044	-0.233651	-1.71863	0.337486	1.26562	-3.97671	-1.41788	-1.36918	-2.68696	-2.5508	-2.28954
282	2.68214	0.0142491	-0.0358	-3.95074	0.521782	0.111024	-0.00226142	3.09169	0.189917	282	-2.14528	-0.438891	-0.875391	0.951235	0.414986	0.711073	-2.21528	-1.08415	-3.34703	-2.90463	-2.51646	-0.40385	-2.93798	0.357754	0.361059	-5.03031	-1.31167	-0.568937	-2.18221	0.25709	0.805943	-3.42569	-0.893884	-0.887261	-1.96039	-2.82571	-1.90093
283	-1.23707	1.2707	2.33636	-0.561301	0.125608	3.85538	-1.31911	1.28585	0.914276	283	-1.99699	0.0239802	-0.152081	0.307686	0.302772	0.298581	-2.24918	-0.942513	-3.52269	-2.66249	-2.75303	-0.953292	-2.46786	0.114285	0.635885	-5.07742	-0.591939	0.0628679	-1.59573	0.496361	0.572909	-3.89492	-1.04297	-1.05411	-2.45157	-2.24305	-1.84508
284	-1.35226	0.55843	0.963482	-1.73736	-0.100732	-1.15607	0.330953	2.52723	0.303769	284	-2.14695	-0.0320085	-0.203072	1.42906	0.444853	0.679387	-1.98504	-0.95339	-3.34084	-2.96271	-2.55023	-1.14274	-3.18439	0.252478	0.216992	-4.54585	-0.691642	0.0374191	-1.3616	-0.200803	0.896055	-3.5699	-0.809577	-1.14503	-2.43995	-2.23244	-2.38459
285	0.24073	-0.985771	1.44014	-1.43123	-1.65393	0.0411105	-0.313039	0.694484	1.42878	285	-1.95872	0.146199	-0.17587	0.578199	0.440322	0.4765	-1.96773	-0.879357	-2.78371	-2.92311	-2.12824	-0.790325	-2.71501	0.175213	0.167813	-4.34723	-0.788843	0.229316	-2.00604	0.0623763	1.08859	-3.18554	-0.46355	-0.990468	-2.16661	-2.51154	-2.27396
286	0.426981	0.472175	1.3909	-0.184701	-0.072047	1.61209	0.144689	0.774368	2.00554	286	-2.4918	0.136722	-0.995636	0.236493	0.149765	1.01588	-1.87685	-0.789613	-2.90047	-2.634	-1.71014	-0.734498	-2.57308	0.498983	-0.188208	-4.78053	-1.00233	0.171081	-1.90089	0.0100088	0.860659	-3.34076	-1.0963	-0.842928	-2.20131	-2.65152	-1.9391
287	0.248446	1.01988	-0.327727	-0.214322	-0.30888	0.501061	-1.04519	2.8283	1.28131	287	-2.05945	-0.440625	-0.422253	0.902021	0.984755	0.533703	-1.6484	-1.00966	-2.99827	-2.42787	-1.3448	-0.870128	-3.2541	-0.30993	0.83511	-4.2108	-0.403367	0.149127	-1.37582	0.0795766	-0.586343	-3.38058	-0.878976	-0.808251	-2.40413	-2.67467	-2.0193
288	0.112287	3.20251	-0.617802	-0.466815	-1.74413	1.84538	-2.23805	2.16322	-0.236451	288	-2.25118	-0.0740593	-0.552352	0.76844	0.672672	1.35931	-1.8962	-0.991416	-2.77594	-2.27786	-1.43188	-1.05732	-2.64279	0.683937	0.376873	-4.25319	-0.448025	0.218	-2.49671	0.203956	0.0271292	-3.50558	-0.699999	-1.07267	-2.35702	-2.1142	-2.42464
289	-1.78707	-0.699214	2.60521	-0.656032	1.67694	1.14129	0.708954	1.12732	0.0552266	289	-2.47482	-0.0160467	-0.178277	0.50824	0.176358	0.674364	-2.24048	-1.0062	-2.93682	-2.8623	-1.55046	-1.21918	-2.37696	0.20692	0.368629	-6.06791	-2.52837	0.726908	-1.94775	0.34841	0.3134	-3.25805	-1.21874	-0.846084	-2.39918	-2.59227	-1.87
290	2.67197	1.09695	-0.134573	-0.0346196	-0.463432	1.21125	-0.138308	1.19335	1.19218	290	-2.18113	0.382825	-0.501254	0.864065	0.699645	0.490393	-1.74906	-0.45541	-3.15122	-2.81906	-1.26861	-0.858692	-2.74579	0.438747	-0.099733	-5.87564	-2.49391	0.456274	-1.92562	-0.0265958	-0.00736071	-3.46052	-0.442865	-0.833949	-2.10188	-2.10259	-1.83568
291	-2.64359	0.155533	2.77028	-0.0817142	-0.514494	-0.285527	0.813348	1.88098	1.47242	291	-2.52766	0.26489	-1.14843	0.753611	0.721093	0.73722	-2.23509	-0.810588	-3.0603	-2.72129	-0.881169	-0.620387	-3.01516	-0.584136	0.356671	-5.27791	-2.11883	0.790273	-1.40632	-0.618402	0.324372	-2.9816	-0.801489	-0.753285	-2.20092	-2.45593	-2.13823
292	-0.0957717	1.45551	0.666089	-1.98073	-0.0772024	-0.937282	1.07816	1.615	0.0718328	292	-2.30923	0.0449751	-0.636788	1.43051	0.2609	1.02827	-2.14576	-1.08373	-3.00515	-0.876078	-0.898644	-0.549311	-2.95818	-0.864351	0.00643672	-5.36782	-2.33669	0.379947	-2.15269	0.280183	-0.146274	-3.04467	-1.89738	-1.06689	-3.03517	-2.67475	-1.85338
293	1.37531	-0.820803	0.717631	-2.74354	-0.648892	-0.707233	-0.237287	4.24853	1.1674	293	-2.33292	0.723492	-0.632997	1.15563	0.336093	0.561906	-2.28328	-1.17399	-2.93597	-2.5797	-0.671725	-1.14129	-2.50774	-0.66307	0.51824	-5.86586	-1.5274	0.200295	-2.13312	0.00172003	0.00704586	-3.34209	-1.53689	-0.446259	-2.59363	-2.50676	-1.41712
294	0.620408	-0.276335	0.177429	-0.969914	1.86715	-0.769087	1.32551	2.62082	0.972645	294	-2.28822	0.254633	-0.748454	0.883152	0.471159	0.13537	-2.34561	-0.68187	-2.6905	-2.29102	-0.629786	-0.428278	-2.53089	-0.29748	0.0381623	-5.04234	-2.06722	0.694625	-1.74006	0.457217	0.500447	-3.2594	-2.09096	-0.621488	-2.30466	-2.43096	-1.66721
295	-1.10611	-1.13868	1.2748	-1.75083	-1.89982	0.932564	-1.09802	2.09279	0.364268	295	-2.22067	0.182866	-0.469731	1.09244	-0.730037	0.426863	-1.99414	-0.904666	-2.2864	-0.551921	-0.396419	-0.660865	-2.97578	0.304578	0.274368	-5.2722	-1.55149	0.960457	-1.75224	0.190205	0.111183	-3.32842	-1.60129	-0.318744	-2.45057	-2.63665	-1.90108
296	-1.4733	0.090875	-0.121866	-0.0192213	-1.6987	1.45829	-0.890901	0.596453	0.0923738	296	-1.92801	-0.0754875	-0.387558	1.24457	1.26994	0.390508	-2.0681	-0.941539	-3.24755	-2.98128	-0.0481157	-0.718347	-2.86064	-0.157012	0.437432	-5.03497	-1.42552	-0.565482	-1.89081	-0.546822	0.439863	-3.02404	-1.6424	-0.823053	-2.74998	-2.61402	-2.16881
297	2.04851	-1.30657	-0.173148	-1.97131	-2.60807	1.09592	-0.487685	1.72029	1.35059	297	-2.38723	0.426502	-0.38683	1.34123	0.940625	-0.0241901	-1.77493	-0.89009	-2.3985	-2.44961	-2.35624	-1.25099	-2.58964	-0.0761176	0.395726	-4.98758	-1.65154	-0.541088	-2.02333	-0.0239607	0.24795	-3.62118	-1.81117	-0.525608	-2.62206	-2.50056	-1.68779
298	2.17747	0.0371268	2.35689	-0.799691	-1.57579	0.320933	0.279713	1.19774	-0.255325	298	-1.72365	0.082497	-0.146916	1.56459	0.389759	0.652407	-1.85024	-0.630063	-2.73132	-1.23849	-1.91461	-1.02366	-3.18006	0.118347	0.278274	-4.51983	-1.69889	-0.938104	-2.51911	0.649679	0.0999253	-2.5577	-1.74251	-0.198106	-2.23681	-2.57269	-1.44146
299	1.45706	3.03207	0.321168	-2.13317	0.545689	1.70129	-0.474112	0.506569	-0.0334714	299	-2.29798	0.697724	-0.717101	1.40973	-0.116659	0.687495	-2.06351	-0.960673	-3.14612	-0.762887	-2.06194	-0.590943	-2.8985	-0.605798	0.324801	-4.58584	-0.854469	-1.01388	-1.83084	0.295275	0.267652	-2.95511	-1.94892	-0.514487	-2.38176	-2.10062	-1.5593
300	-0.14896	-0.0307044	1.03489	-1.68342	-0.796909	-0.769729	-0.346476	2.14308	2.15282	300	-2.1274	0.227529	-0.819918	0.881761	0.225919	0.53948	-2.47187	-1.11395	-2.32893	-0.933871	-1.61174	-0.735451	-2.96153	-0.342811	0.62007	-4.73984	-1.68681	0.103214	-1.96597	0.172621	0.586457	-3.35318	-1.81855	-0.67852	-2.5788	-2.52056	-2.01541
301	-0.14305	0.849827	-0.176223	-0.568139	-0.557328	0.701509	-0.259061	0.618301	-1.00161	301	-2.27208	0.256481	-0.159592	1.44051	0.186461	1.44776	-2.11969	-0.886792	-2.70716	-0.0363804	-1.4814	-0.583219	-2.65366	-0.129281	0.522628	-6.14664	-0.851126	0.189057	-2.05461	-0.361595	-0.335563	-4.22459	-2.07292	-0.211669	-2.55293	-1.77143	-1.95586
302	1.12792	-1.03034	0.859267	-0.824501	-1.62879	-1.41582	-1.74295	0.544678	1.11112	302	-2.59489	-0.182088	-0.305781	-0.288188	0.0464282	1.12293	-1.7665	-0.502767	-3.21903	-2.27867	-1.42317	-0.699186	-3.25553	-0.182509	0.0875828	-6.31133	-1.19691	0.0943086	-1.80119	-0.542222	-0.395718	-4.08415	-1.36373	-0.0441792	-2.53323	-1.7482	-1.81239
303	-1.09918	0.636462	1.63782	-0.657343	0.619876	1.02504	0.1309	0.962496	1.50159	303	-2.25564	-0.047978	-0.665311	0.0364309	0.16537	0.723132	-1.89184	-1.14389	-2.998	-2.63879	-1.20417	-0.10716	-3.55003	0.109127	1.01336	-5.60007	-0.416963	0.540267	-2.28758	-0.431115	-0.451579	-4.34639	-1.62489	0.249923	-2.71882	-1.88674	-1.2038
304	0.924167	-1.88671	-1.10369	-0.192169	0.519242	1.52279	-0.599161	2.42029	1.6462	304	-2.91929	-0.00692012	-0.310964	-0.280859	0.363337	0.804143	-1.97923	-1.12129	-2.81119	-2.76778	-0.797982	-0.259543	-3.40435	-0.346262	-1.72555	-5.60257	-0.350271	0.542261	-2.88205	-0.907693	-0.596074	-4.10798	-1.526	-0.22557	-2.31848	-1.6238	-1.13261
305	1.45956	0.0962003	1.1064	-0.0350318	-1.39143	-0.433447	-0.671621	3.80634	1.71958	305	-2.84831	0.12538	-0.391169	0.209178	-0.0157896	0.658299	-2.39998	-0.908786	-2.85446	-2.63596	-1.231	-0.6563	-3.32416	0.0900018	-1.8739	-5.70302	-0.498962	0.921902	-2.55793	-0.685766	-0.64602	-4.45147	-1.56305	-0.822077	-2.44521	-1.60614	-1.32225
306	1.93374	-1.0485	0.693335	0.319476	-1.6301	1.54106	-0.69637	2.52198	2.26537	306	-2.9245	-0.0191474	-0.805293	0.409163	0.113659	1.00363	-2.51461	-1.67626	-3.44577	-2.93278	-0.936693	-2.47682	-3.47721	-0.764934	-1.70366	-5.53978	-0.305112	0.496039	-2.36507	-0.419329	-0.0777716	-4.23417	-2.00949	-0.992496	-2.34293	-3.2445	-1.15992
307	-0.0776261	1.60377	0.242937	-0.846046	-0.612677	-0.508394	2.36079	3.49267	0.563395	307	-2.72217	0.239481	-1.61105	0.270832	0.109081	0.402851	-2.60151	-1.63038	-3.4476	-3.02251	-2.6756	-2.64119	-4.20903	-0.476476	-1.85669	-5.49548	-2.29446	0.868836	-3.08644	-1.66657	-0.647213	-5.17953	-2.00815	-1.98233	-2.72939	-3.46432	-1.14672
308	-1.2703	2.70416	0.95756	0.377872	0.133636	3.13752	-0.459094	3.5256	0.186044	308	-3.46312	0.0882325	-1.15925	-0.0356996	0.234587	0.787495	-2.76988	-1.65719	-3.57509	-3.58124	-2.67609	-2.61666	-4.41882	-0.781086	-2.4737	-7.03255	-2.26215	-1.53284	-3.37226	-1.27867	-0.967974	-4.51679	-1.89104	-2.66886	-2.13098	-3.43839	-1.56703
309	-3.81589	-0.880678	1.38748	1.5936	-1.14757	1.25013	2.4419	4.73535	2.76805	309	-2.79814	0.151889	-0.500302	0.0780903	-0.490245	0.305864	-2.9873	-2.09784	-3.56023	-3.22773	-2.57543	-2.66943	-4.71808	-1.71577	-2.89235	-6.89154	-2.31378	-1.39705	-3.13422	-1.27187	-0.769669	-5.21334	-2.03472	-1.95043	-2.49342	-3.75983	-0.717102
310	2.5349	0.286244	1.88365	-1.16258	-0.350424	-0.622083	1.64479	3.88275	4.4371	310	-2.6635	0.0708578	-0.96361	-0.0705773	-0.540365	0.16702	-3.20636	-1.97221	-4.15518	-3.55366	-2.84754	-2.93668	-4.61174	-2.26802	-2.66357	-7.05632	-2.95524	-1.24682	-4.43407	-1.32625	-0.634333	-4.86466	-2.26767	-2.26978	-3.05413	-3.6145	-1.70224
311	-0.0538401	0.352296	2.2687	-0.842234	-0.960383	2.75784	1.36071	4.86117	3.19039	311	-3.32536	-0.0700421	-0.900105	0.110233	-1.02721	0.24182	-3.44666	-1.89743	-3.96761	-3.56673	-2.83213	-3.08871	-4.96312	-2.60784	-2.48195	-6.75008	-2.91206	-1.24757	-3.33777	-1.46543	-0.733271	-4.91277	-2.73054	-2.34928	-2.87192	-3.67909	-1.51499
312	-0.657905	-0.814783	3.14098	0.909192	0.886929	3.82515	0.46601	0.783292	4.58977	312	-3.12135	-0.328189	-1.35514	-0.00960386	-0.414665	-0.450088	-2.90962	-2.2894	-4.16333	-3.84507	-2.82189	-2.92489	-4.41847	-3.1483	-2.97278	-7.26827	-2.78225	-1.59128	-4.68424	-1.95595	-1.7808	-4.86941	-2.66241	-2.55336	-2.86058	-4.35366	-1.84237
313	-2.11359	-0.137309	1.44132	0.107352	0.978036	2.423	1.32917	3.71053	4.88654	313	-3.28333	-0.65679	-1.42339	0.167621	-1.15771	-0.489092	-3.49304	-2.51222	-4.02733	-3.66326	-2.88825	-2.94837	-4.78396	-2.46906	-2.21864	-7.11553	-2.99134	-1.15752	-4.86194	-1.69455	-1.74512	-5.3416	-2.80124	-2.90123	-2.64744	-4.46347	-4.04594
314	0.874463	0.653309	1.05574	2.10414	3.11631	2.5487	1.76935	5.90975	5.50521	314	-3.80403	-1.04822	-1.71361	-1.33676	-1.25047	-0.944186	-3.37533	-2.37383	-4.09801	-3.89869	-2.55121	-3.34833	-5.10619	-2.7544	-2.85118	-6.91626	-3.09166	-1.41566	-5.22028	-1.69062	-1.51123	-5.65171	-2.94932	-2.76072	-4.79011	-4.14181	-3.58593
315	2.65705	-0.0926398	1.92014	1.45352	2.11114	4.05249	4.51032	3.95319	4.73054	315	-4.27787	-0.316298	-1.39591	-1.56884	-0.5824	-0.918357	-3.38114	-2.57882	-4.71614	-4.10664	-2.75067	-3.1808	-4.99207	-2.95292	-2.5062	-8.50624	-3.46348	-1.33644	-5.04113	-1.79684	-1.73844	-5.66356	-3.62359	-3.1002	-4.71776	-4.21241	-3.12862
316	-0.477485	0.507852	1.05116	1.17159	1.44775	4.86909	2.07988	4.20646	6.96508	316	-4.25565	-0.536518	-1.65962	-1.34149	-0.63623	-1.03299	-3.51163	-2.36289	-4.78061	-3.89328	-2.44312	-3.30816	-5.31096	-3.44393	-3.25252	-8.21917	-2.98536	-1.62462	-4.83624	-2.29618	-2.28384	-5.4449	-3.20262	-2.61201	-4.38427	-4.64059	-3.71492
317	0.945676	1.37258	1.61675	1.33477	0.549125	3.0151	3.66522	3.50608	5.7588	317	-3.93317	-0.398643	-1.63358	-1.98582	-0.828253	-1.14275	-3.70527	-3.00316	-4.752	-4.08505	-4.44001	-3.55619	-5.41779	-2.59608	-2.64674	-8.84226	-3.42871	-1.23514	-5.27443	-2.45304	-2.06163	-5.95791	-3.2324	-3.02995	-4.79735	-4.16852	-3.6786
318	-2.07792	2.91825	2.56741	3.6176	2.25284	3.38737	5.54837	3.22671	4.82547	318	-3.722	-0.584626	-1.48121	-1.16848	-0.907736	-0.377069	-4.21989	-2.95043	-4.67999	-3.85225	-4.33713	-3.64838	-5.47718	-2.92354	-3.09693	-8.37375	-2.86606	-1.75266	-5.1883	-1.9871	-1.64761	-6.7371	-3.02163	-3.06954	-4.98623	-4.47675	-3.92739
319	-1.80821	0.361742	-0.671564	2.75797	0.315821	3.60002	3.21625	4.03184	5.05574	319	-4.00231	-1.1902	-1.78555	-1.83641	-0.879351	-0.71266	-4.08761	-3.08671	-4.85919	-4.11301	-4.23421	-3.80744	-5.74424	-3.08435	-3.07465	-8.50242	-3.14016	-1.3737	-5.53288	-2.24036	-1.70958	-6.93742	-3.653	-3.0118	-5.22476	-4.45961	-3.58045
320	0.235721	-0.0634525	2.77187	4.06333	1.59385	4.14972	2.3858	3.07886	6.92026	320	-4.43053	-1.2656	-2.03539	-1.55475	-1.83724	-0.329284	-4.22878	-3.41834	-5.59892	-4.35711	-4.7286	-3.54435	-5.83456	-3.21327	-2.99182	-8.62229	-3.56199	-1.52004	-5.17222	-2.81343	-1.84124	-7.17217	-3.61364	-3.29204	-4.69974	-4.59377	-3.58499
321	1.27384	0.461812	3.42717	2.09179	0.454487	3.23648	5.7018	3.94374	3.68164	321	-4.61148	-0.740311	-2.16743	-1.71014	-1.50808	-0.969146	-4.09853	-3.10669	-5.70829	-4.553	-4.50188	-3.78587	-5.641	-3.51619	-3.48294	-8.59004	-3.69654	-1.85661	-5.31213	-2.85809	-2.27396	-7.30839	-4.05233	-2.8951	-5.38984	-4.00985	-3.57394
322	-0.094513	2.92591	0.772362	4.85891	2.98517	4.0767	5.74091	4.14322	6.5649	322	-4.59653	-0.626233	-2.49608	-1.68143	-1.10171	-1.37447	-4.32034	-3.76821	-5.83844	-4.39551	-4.32478	-3.66559	-6.22168	-3.2777	-3.61611	-8.34904	-4.93783	-1.88208	-5.00581	-2.66941	-2.04747	-7.59167	-4.20272	-3.04452	-5.17557	-3.99946	-3.12309
323	2.1797	-1.64017	2.04545	4.82588	0.0701175	4.97808	3.84152	3.56247	7.07818	323	-4.38153	-0.682123	-2.55099	-1.82817	-1.60115	-1.15826	-4.34997	-3.80849	-6.15501	-4.22903	-4.23829	-3.51336	-5.91937	-3.54597	-3.60362	-8.7205	-5.8698	-3.41928	-5.33286	-2.54766	-2.189	-7.52789	-3.97007	-3.10591	-5.22678	-4.64408	-3.25795
324	1.18937	0.899205	2.55094	6.01601	2.48974	6.87298	5.27727	4.59024	6.16901	324	-4.86899	-1.13879	-2.35077	-1.46654	-1.76881	-0.577183	-4.71302	-3.37256	-5.91391	-4.58048	-3.83333	-3.96128	-6.0766	-3.37257	-3.62218	-10.1835	-4.94003	-3.69067	-5.32575	-2.68546	-2.2307	-7.52003	-3.97353	-3.61571	-5.17133	-4.42812	-3.33615
325	1.79239	2.44319	0.023559	5.44918	0.304622	4.25291	4.69436	5.84138	5.00925	325	-5.01647	-1.29236	-2.7405	-1.7024	-1.45209	-2.54656	-4.74362	-3.48396	-6.34045	-4.60394	-4.25611	-3.34532	-5.76396	-3.45583	-4.10872	-10.0047	-5.04829	-3.5724	-5.39603	-2.60751	-2.03883	-7.41169	-4.18382	-3.08048	-5.29572	-4.62994	-3.53552
326	-2.5597	0.912915	-0.522875	5.4429	2.85356	5.96018	4.74781	1.17004	6.22501	326	-4.81215	-1.07472	-2.03306	-0.942535	-1.30708	-1.5465	-4.89436	-3.71097	-6.40725	-4.65283	-3.65268	-4.21127	-6.49435	-3.42009	-3.5394	-10.27	-5.50224	-3.67669	-6.32862	-2.82862	-1.63192	-7.74498	-5.2819	-2.98456	-4.86248	-3.99972	-3.30376
327	4.16997	2.11364	0.118841	5.47947	2.06376	4.10492	4.74432	4.36661	5.81771	327	-4.81241	-1.32525	-2.29909	-1.14318	-1.86002	-1.91524	-4.9927	-3.64724	-6.35597	-4.66805	-4.1016	-3.9065	-6.45969	-3.50694	-3.31231	-10.1037	-5.30808	-3.10666	-5.56309	-4.07361	-2.04837	-7.47497	-4.72653	-3.57476	-5.12187	-4.3538	-3.42108
328	0.59038	3.05667	1.98831	5.48624	1.00111	6.87425	4.56711	4.76359	5.11493	328	-5.04989	-1.24859	-2.57617	-1.18465	-1.75002	-0.932082	-4.87937	-4.1322	-6.4237	-5.15147	-3.72686	-5.87534	-6.36692	-4.80744	-4.21759	-9.81751	-4.94346	-3.46411	-5.6152	-3.30093	-1.95506	-7.96042	-5.05202	-2.93313	-5.26659	-4.09221	-3.4581
329	-3.33896	1.11516	-0.0841581	4.5476	2.12635	5.20739	4.98449	4.89704	7.14022	329	-5.24987	-1.02312	-2.27643	-1.14864	-1.28135	-1.65117	-4.96232	-4.33838	-6.21899	-5.13658	-5.61324	-5.70029	-6.10182	-5.13168	-4.16779	-10.0218	-5.60273	-3.25546	-5.45716	-3.3303	-1.84825	-7.58357	-5.03685	-3.86435	-4.90165	-4.70878	-5.16582
330	1.1574	1.34976	3.90956	4.41146	-0.159017	3.43575	4.0776	4.11378	5.97412	330	-5.31195	-1.92352	-2.7065	-1.56394	-2.87863	-1.67526	-5.42739	-4.37949	-6.56702	-5.26777	-6.07383	-5.71544	-6.46048	-5.32749	-4.2376	-9.96042	-5.58801	-3.3768	-5.26281	-3.12347	-3.0709	-7.59998	-5.39294	-4.01091	-5.00655	-6.06803	-4.98174
331	-2.40515	1.6451	-0.837407	2.50778	0.889826	4.55106	4.54238	3.64093	7.04175	331	-5.29707	-1.71251	-3.22729	-2.89293	-2.15348	-1.53704	-5.02157	-4.02657	-6.59194	-4.96042	-5.7647	-5.9412	-6.06165	-4.78314	-3.82671	-9.49135	-5.87672	-3.44264	-5.94495	-2.65892	-3.46036	-7.65625	-5.66237	-4.97144	-5.24503	-6.10713	-5.44613
332	0.169851	2.79789	1.24814	4.84748	0.606001	5.17094	4.80681	5.06578	6.23265	332	-4.82907	-1.6753	-3.37872	-2.4397	-2.0845	-1.15466	-5.09026	-4.33008	-6.5106	-6.83062	-5.91208	-5.9884	-6.52532	-5.15391	-4.15433	-9.60347	-5.11432	-3.07504	-5.27076	-3.39134	-3.02659	-7.80295	-5.23431	-4.80128	-5.26868	-5.89959	-5.33585
333	2.51509	2.71389	1.25936	5.20358	0.818856	4.93289	4.34395	4.9066	6.60855	333	-5.11981	-1.47621	-2.67099	-2.75242	-2.6191	-1.90832	-5.61834	-4.06327	-6.89661	-7.03939	-5.1027	-5.60589	-6.50458	-4.72698	-4.64362	-11.6888	-5.40155	-3.4364	-5.71532	-3.56349	-2.82199	-7.97828	-5.25231	-5.10046	-5.59684	-6.21502	-5.04081
334	1.70666	-0.111215	3.91228	5.81776	0.919511	2.06248	3.50742	5.51206	6.74659	334	-5.66052	-1.64491	-2.8228	-2.51123	-2.06905	-2.06456	-5.36971	-4.55943	-6.88581	-6.98365	-5.53331	-5.84114	-6.80733	-4.25151	-4.68513	-11.4758	-5.32543	-3.5016	-5.41639	-3.47979	-3.18368	-8.08744	-5.54705	-5.48664	-5.73475	-5.72956	-5.11449
335	1.16096	-0.121693	1.68905	4.95013	2.1015	2.36209	5.07133	6.6969	5.50946	335	-5.66851	-1.61962	-3.1758	-2.46557	-2.36438	-1.30062	-5.55732	-4.89547	-6.7008	-7.04939	-5.43255	-5.7832	-6.36834	-5.16077	-3.9702	-11.052	-5.44626	-3.9235	-5.43675	-3.98233	-2.48749	-8.09893	-5.73974	-4.94382	-5.58799	-5.85548	-5.30694
336	0.0316516	3.90841	1.45423	5.05021	2.74412	4.3491	3.18431	7.03495	5.80387	336	-5.21803	-2.13652	-3.44864	-1.86746	-2.3215	-1.34029	-5.6712	-4.46311	-6.73602	-6.7972	-5.5527	-5.61091	-6.60561	-5.07224	-4.45394	-10.9196	-5.45581	-3.76148	-5.79453	-4.00715	-2.79165	-7.99359	-5.75436	-5.50588	-5.35831	-5.8652	-5.27167
337	1.10571	-0.055516	2.08592	5.54753	0.268726	3.58619	4.03448	6.44407	6.15924	337	-5.17817	-1.96857	-3.50785	-2.05715	-2.33008	-1.94167	-5.58436	-4.77479	-7.05526	-7.10403	-5.43993	-6.13537	-6.69642	-4.49601	-4.60085	-11.2384	-5.69996	-3.83565	-5.39431	-3.40409	-2.78387	-7.97381	-6.21111	-4.92346	-5.09397	-6.02347	-5.24292
338	-1.56138	2.43331	2.64623	1.63262	0.64533	4.05189	7.19946	5.8378	6.61932	338	-6.04697	-1.94911	-2.91157	-1.89183	-1.86004	-1.6516	-5.31888	-4.56769	-7.40944	-7.34372	-5.17703	-6.06389	-6.66746	-4.77151	-4.77303	-10.2639	-5.61081	-3.07645	-5.38734	-3.47049	-2.6399	-8.13233	-6.1097	-5.26054	-5.12453	-6.3481	-5.02871
339	2.19812	0.250362	1.51298	3.46518	1.8744	5.26813	3.13352	2.37704	5.80649	339	-5.60378	-2.04324	-3.03111	-1.95988	-3.03366	-1.816	-6.02505	-4.72129	-6.90175	-7.14918	-5.58553	-5.88904	-7.04308	-4.87512	-6.3286	-11.3684	-5.42924	-3.44431	-5.52186	-4.4133	-3.25452	-8.3818	-5.69379	-5.15647	-5.20239	-5.89232	-5.44998
340	2.54613	2.65903	1.59804	8.59465	0.370655	1.49282	5.24338	4.29183	7.90036	340	-6.088	-2.1407	-3.10527	-2.54063	-2.99907	-1.46118	-6.06813	-4.99849	-7.56802	-6.86629	-5.72267	-6.14033	-7.63507	-4.82677	-6.41124	-10.8078	-6.09899	-3.40873	-6.33508	-4.21164	-2.96791	-8.36304	-5.95901	-5.48029	-6.94742	-5.83886	-5.63592
341	0.0509643	1.13425	1.65069	4.1897	2.45925	4.33105	5.90174	4.49211	5.51272	341	-5.96334	-2.02972	-3.38142	-2.36883	-2.62512	-1.33851	-5.9953	-4.92396	-7.07753	-6.90058	-5.19677	-6.09815	-7.49972	-4.85473	-6.83746	-10.9182	-5.14424	-3.47183	-5.60413	-3.92762	-2.62559	-8.03346	-5.67377	-5.5043	-6.77738	-6.00106	-5.35541
342	2.88407	3.20127	2.88092	2.32027	0.096507	4.25177	6.4603	5.15476	5.22398	342	-5.6975	-2.00746	-3.09757	-2.30237	-2.7478	-1.72438	-5.87745	-5.08185	-7.38661	-6.46988	-5.2803	-6.04107	-8.92544	-4.83303	-6.67083	-10.6332	-5.61384	-4.89397	-5.45344	-4.07686	-2.81397	-8.62931	-5.43856	-5.03689	-6.78676	-5.91937	-5.32055
343	3.29226	1.2652	1.79175	5.38198	1.36093	3.8356	5.53482	3.81259	4.985	343	-5.9452	-2.01793	-3.17806	-2.27437	-2.8229	-1.87133	-5.98832	-4.67446	-7.49801	-6.81008	-6.86524	-5.77894	-8.99698	-4.84274	-6.39335	-12.3403	-5.2851	-4.3627	-4.99168	-3.64849	-3.54623	-8.04271	-6.05856	-5.63971	-7.26666	-6.3396	-5.20021
344	3.03196	1.81531	3.16097	4.45567	0.562926	4.38153	5.31098	3.62656	4.27388	344	-5.90827	-2.22771	-2.6767	-2.48866	-2.53362	-1.83648	-6.45664	-5.35877	-7.21648	-6.86711	-6.4839	-5.87088	-8.17898	-4.74119	-6.29494	-12.1373	-6.22325	-5.13735	-5.67888	-3.7709	-2.33617	-8.36739	-6.21406	-5.43671	-6.75576	-5.98826	-5.33468
345	-0.973724	1.67245	-0.212864	2.92139	-2.05614	5.3464	4.92807	4.11677	5.14334	345	-6.20529	-2.12599	-3.30554	-1.93647	-2.46282	-1.45469	-6.17155	-4.84881	-7.46752	-7.38212	-6.90496	-5.69302	-8.88144	-4.69341	-6.23617	-12.3229	-6.29247	-5.13446	-6.68667	-4.46303	-3.95319	-8.28318	-5.84701	-5.69625	-6.80697	-5.7404	-5.12158
346	0.297573	1.01853	-0.379983	5.2879	-0.00532328	4.85971	6.66419	3.56789	6.34968	346	-6.44361	-1.98331	-3.24913	-2.0088	-2.23113	-1.97952	-6.31262	-5.20607	-8.02759	-7.04341	-6.99538	-6.53584	-8.73818	-4.85421	-6.13728	-11.5777	-6.13216	-4.93536	-5.49997	-4.50548	-4.1939	-8.42009	-6.16911	-5.66037	-6.43326	-6.09908	-5.21924
347	-0.897176	3.34812	1.35236	6.55678	0.914559	6.02995	4.66852	4.81518	5.75355	347	-6.3474	-2.23211	-2.93286	-2.23053	-3.15583	-1.05969	-6.17697	-5.10281	-7.48524	-6.99921	-6.63187	-5.68875	-8.85027	-5.05652	-6.45506	-11.7949	-6.01995	-5.26493	-6.60802	-4.96175	-4.1223	-8.37283	-6.16676	-5.72909	-6.63025	-6.25876	-5.51614
348	2.82559	0.982452	3.93222	4.09613	-0.752274	2.61761	5.93337	5.19972	4.42434	348	-5.95265	-2.08248	-3.1166	-2.36682	-3.42023	-1.74393	-6.79384	-4.9688	-7.93418	-6.16981	-6.60184	-6.48578	-8.93085	-5.20559	-6.08188	-11.6189	-6.17018	-5.09723	-7.29578	-4.06225	-3.28996	-7.94351	-6.26389	-5.30984	-7.20022	-5.87284	-4.83342
349	1.13169	1.79812	2.14502	5.51011	1.18403	4.34397	5.72782	5.24578	5.63282	349	-6.99711	-3.0794	-3.2123	-2.51996	-3.19416	-1.41315	-6.73843	-4.97613	-7.58126	-6.57053	-6.71545	-6.01965	-9.55072	-5.05387	-6.05343	-12.3324	-6.43616	-5.23731	-7.15271	-4.25031	-3.81318	-8.32393	-5.99118	-5.78251	-6.81773	-6.41024	-4.96247
350	2.44364	2.52358	0.537513	4.08738	0.378663	2.13893	3.65242	5.44507	5.92855	350	-6.18612	-3.14428	-3.2449	-3.26829	-2.78288	-1.93771	-6.6635	-5.38021	-7.53713	-7.00927	-7.02546	-6.84381	-7.6511	-5.32322	-5.99586	-11.9282	-6.12951	-5.20976	-5.9092	-4.51928	-3.71467	-8.66634	-6.49561	-5.54217	-6.551	-6.35782	-5.3628
351	3.54762	1.2511	3.79748	4.89734	-0.628089	3.79617	5.78022	5.27716	4.48304	351	-6.4479	-2.44576	-3.81536	-2.85504	-2.16327	-1.37424	-6.14926	-4.74447	-7.93233	-7.49886	-7.10279	-6.82761	-7.39947	-4.99581	-6.10584	-12.5201	-6.58664	-4.46878	-5.90437	-3.5347	-3.70651	-8.51088	-6.30709	-5.61235	-6.89874	-6.70204	-6.73797
352	1.18587	1.08644	3.67773	5.22222	0.469497	5.02122	4.56137	4.44368	4.31658	352	-6.19097	-3.21591	-3.42206	-2.47032	-2.60528	-1.89277	-5.9709	-4.62286	-7.77017	-7.69757	-7.0225	-6.91499	-7.6095	-5.20745	-6.18761	-12.3933	-6.70177	-4.0801	-5.51307	-4.68736	-3.76771	-9.14247	-6.41506	-6.0588	-6.94404	-6.23691	-6.68864
353	0.177756	2.29671	3.17991	4.90637	2.07069	2.18276	5.17528	3.55379	5.65636	353	-6.30643	-2.65146	-3.32784	-2.32161	-3.49432	-1.39698	-6.2241	-5.50646	-7.6678	-7.66544	-7.36052	-6.65436	-7.6746	-5.02534	-6.16336	-12.9047	-7.15156	-4.3993	-5.70328	-4.49135	-3.04634	-8.77945	-6.55807	-6.27209	-6.77583	-6.13908	-6.79044
354	0.154329	0.688194	0.700146	4.44196	1.87888	3.87975	4.73989	6.4351	4.65484	354	-5.65176	-3.06791	-3.24196	-2.28664	-2.79121	-2.33402	-6.14558	-4.39385	-7.63554	-7.78653	-7.32449	-7.24393	-7.97838	-4.89719	-6.77348	-12.9466	-7.02294	-4.45152	-5.96963	-4.59249	-3.82238	-8.90096	-6.77488	-6.79421	-6.62356	-6.41536	-6.6918
355	1.80552	1.22351	1.03235	5.32555	2.54857	6.07595	2.642	0.807273	5.51604	355	-6.02984	-2.32348	-3.03102	-2.15763	-3.16913	-2.2623	-6.37157	-5.0819	-7.91037	-8.01909	-7.44277	-7.30031	-7.65734	-5.33669	-5.51463	-12.9218	-6.74092	-4.34006	-5.80894	-4.58449	-4.00747	-9.00764	-6.31074	-6.47644	-6.73308	-6.54607	-6.60051
356	1.17771	0.833478	4.35436	2.74109	0.0499877	1.59808	2.33436	3.28314	3.86787	356	-5.89308	-2.36342	-3.20449	-2.05442	-2.74246	-1.84412	-6.29487	-5.01081	-7.90855	-7.5194	-7.4946	-7.14547	-8.05484	-5.0467	-6.07156	-12.8112	-7.14496	-4.93575	-5.69347	-4.45235	-3.44042	-8.575	-6.8	-6.26905	-6.88864	-6.32157	-6.96846
357	0.778157	1.47108	1.36773	4.36034	0.701272	5.91219	2.68914	3.24041	3.58705	357	-6.70763	-2.51853	-4.15838	-1.99434	-3.03259	-2.14399	-6.66216	-4.87541	-7.884	-7.404	-7.50342	-7.22016	-7.29519	-5.60397	-6.19991	-13.0859	-7.1175	-5.03769	-5.42713	-3.91195	-3.92566	-8.7658	-6.30094	-5.7783	-6.72888	-7.42991	-6.56977
358	-0.48914	4.3582	2.84447	2.04214	-1.74133	3.9082	2.93088	5.30847	2.83891	358	-6.15811	-2.19655	-3.75843	-2.48947	-3.13878	-2.07726	-6.45573	-5.02042	-7.92724	-7.74818	-7.55298	-6.93249	-7.3092	-5.36866	-6.3798	-13.4479	-7.28428	-4.77269	-5.60074	-3.36049	-3.78713	-8.94295	-6.15327	-6.18365	-6.97271	-7.67351	-6.97211
359	3.49771	0.372844	2.69303	3.42694	0.183081	5.44754	1.80697	3.94565	1.2007	359	-6.64915	-2.32523	-3.42964	-2.01461	-2.84646	-2.16808	-6.08566	-5.10578	-8.25247	-7.62029	-7.36643	-4.95498	-7.34028	-5.05658	-6.30728	-12.9328	-6.89287	-5.01408	-6.23077	-4.31566	-3.88073	-8.80651	-6.48938	-6.36662	-6.85197	-7.51992	-6.3508
360	1.50271	1.02071	0.139442	2.78768	0.23388	4.55906	3.29046	3.75659	2.90768	360	-5.75055	-2.3988	-3.66521	-2.49694	-2.71626	-1.50603	-6.53803	-4.75641	-7.8026	-8.29292	-7.56307	-5.85292	-7.88571	-4.55768	-6.16023	-12.6456	-7.10523	-4.66225	-6.12414	-4.05799	-3.70064	-8.9997	-6.5602	-6.08195	-6.65664	-7.69188	-6.72407
361	-0.53364	-0.825754	1.96084	3.89262	1.75704	4.02433	3.76576	1.82633	4.01757	361	-6.76284	-2.34884	-3.31699	-2.07436	-2.66066	-1.52407	-6.56114	-5.49761	-8.25034	-7.77585	-6.71698	-5.46549	-7.85813	-4.43082	-5.9315	-12.838	-7.385	-4.8139	-5.97837	-4.29544	-3.82658	-8.73201	-6.48741	-6.09397	-6.83915	-7.76619	-6.88838
362	0.418661	1.36469	-1.04586	5.37567	2.88654	1.48267	4.31787	4.57392	4.33593	362	-6.47419	-2.48629	-2.928	-2.52458	-2.96874	-1.8211	-6.81646	-5.08123	-8.22136	-7.22349	-7.03515	-5.60459	-7.38684	-4.60033	-5.6422	-12.9017	-6.67425	-4.75576	-5.68683	-4.64975	-3.5727	-9.15627	-6.55912	-5.91495	-6.95255	-7.34469	-6.60565
363	1.89259	0.688953	0.0598707	1.26143	1.50466	5.39839	3.00053	3.9038	3.07766	363	-6.17477	-1.89548	-3.28891	-2.24637	-2.55097	-0.992759	-6.83616	-5.06656	-7.71121	-7.5544	-6.90383	-5.58332	-7.49564	-4.61241	-5.49201	-12.8447	-6.57386	-4.88231	-5.61752	-3.76117	-3.36495	-9.34837	-6.48759	-6.33908	-6.5865	-7.45881	-6.75596
364	2.34519	3.16284	1.51494	4.65898	1.96124	1.11621	2.53159	2.88929	3.95183	364	-6.28049	-2.54606	-3.23685	-1.40379	-3.34378	-1.56414	-6.588	-5.63861	-8.32647	-7.44193	-6.7441	-5.63759	-7.80857	-3.99456	-5.22312	-12.4346	-6.42716	-4.45575	-6.66087	-3.60685	-3.36662	-8.64641	-6.46318	-4.58826	-6.78914	-7.62896	-7.07776
365	-0.784073	2.13907	3.06961	2.96172	2.14619	1.60452	1.9615	2.22328	2.69703	365	-6.19399	-2.1538	-3.30108	-1.98163	-2.78608	-1.25604	-6.44649	-5.29278	-7.67508	-8.01971	-6.39732	-4.95919	-7.71408	-4.09181	-5.429	-12.6347	-6.03007	-4.95389	-6.20553	-3.34904	-3.29335	-9.43858	-6.31141	-4.71228	-7.24991	-7.57872	-6.88967
366	-0.979743	-0.0687179	-0.0518814	2.4288	-0.883561	2.98378	1.12584	0.94315	2.98717	366	-6.31175	-1.96641	-3.13777	-2.37955	-3.05115	-1.17345	-6.62884	-5.16635	-7.90696	-7.70939	-6.96127	-5.39868	-7.18261	-4.26051	-5.27765	-12.6186	-6.48123	-5.07301	-6.75951	-3.75816	-3.12491	-9.00304	-6.12144	-4.41389	-6.69066	-7.3274	-6.64855
367	2.27756	1.04249	0.170846	3.48375	1.24877	0.996126	3.09001	3.63626	3.55444	367	-5.78802	-1.94469	-2.86711	-1.65861	-2.79417	-1.4416	-6.71411	-5.45565	-7.7671	-7.81799	-6.51511	-5.31356	-6.97951	-3.67977	-5.06493	-12.5932	-6.42214	-4.72467	-6.01941	-3.07326	-3.27904	-9.22695	-6.29304	-4.76912	-6.93143	-7.63942	-6.70684
368	3.18512	1.61009	1.0681	2.80294	-0.651589	3.48645	2.31389	1.28351	2.39754	368	-5.68836	-2.38102	-3.36392	-1.96275	-2.51461	-1.25403	-6.55834	-5.2281	-7.53736	-7.64188	-5.98901	-4.63376	-7.38207	-4.05331	-5.05972	-12.369	-6.64591	-4.35708	-6.26921	-3.26471	-2.85996	-8.8955	-5.87884	-4.22649	-7.15099	-7.54823	-6.75169
369	3.00681	2.9724	3.04393	0.71129	-0.0409103	2.20814	3.22441	1.33233	1.34936	369	-5.76732	-2.3475	-2.92561	-2.09976	-2.75159	-1.08576	-6.83615	-5.40128	-7.32979	-7.35215	-6.36626	-4.76297	-6.8182	-3.79289	-5.06169	-12.2327	-6.42245	-4.11128	-6.32299	-3.34564	-2.65865	-9.25474	-6.11507	-4.47983	-7.0107	-7.71399	-6.71871
370	0.422295	-1.28846	1.97454	1.25169	-0.509975	0.0603442	0.604947	2.0222	3.97201	370	-5.58547	-2.51277	-3.1275	-1.98785	-2.71894	-1.44172	-6.99063	-4.5798	-7.17516	-7.6822	-5.81742	-4.27056	-6.69558	-3.81834	-4.98542	-12.0642	-7.00291	-3.79101	-6.24044	-2.71071	-2.97569	-8.69014	-6.32945	-4.61178	-6.78235	-7.18201	-6.65613
371	-0.0834441	1.26618	0.873964	1.30878	1.1402	1.4437	2.0611	1.36622	0.268997	371	-6.17101	-2.29545	-2.43748	-2.1454	-1.78485	-1.36549	-6.74168	-5.08241	-7.21763	-6.95349	-5.69244	-4.85044	-6.61623	-3.64714	-4.39329	-11.8417	-6.71021	-4.34555	-6.37854	-2.84467	-2.47026	-8.99529	-5.5324	-4.51856	-7.13778	-7.12469	-6.22413
372	2.35881	1.93025	3.15832	1.69988	0.849227	0.989636	1.41652	1.43769	1.67709	372	-5.4657	-2.20499	-2.14737	-1.68885	-2.0518	-1.72719	-6.69249	-4.69257	-7.35293	-7.22574	-5.5782	-4.86986	-6.71741	-3.10315	-4.49155	-11.9453	-6.88154	-3.53315	-6.15751	-2.63108	-2.59472	-9.02453	-5.68626	-3.94073	-6.90947	-6.90464	-6.50452
373	2.00719	2.82603	2.6958	0.619218	1.52725	3.09762	2.90596	2.9078	1.78077	373	-5.49323	-2.56094	-2.18764	-2.21722	-2.82733	-1.53182	-6.85592	-4.58073	-7.2284	-7.34583	-5.73389	-4.58872	-6.15457	-3.42114	-4.5563	-11.6081	-6.24475	-4.2096	-5.57866	-2.23293	-2.02819	-8.68554	-5.48209	-3.81626	-6.82133	-7.08128	-6.48774
374	1.54097	0.431015	0.51891	-0.0571697	0.652974	4.06784	2.84373	1.40556	0.683858	374	-5.52338	-2.37842	-2.68462	-2.05387	-2.8918	-1.36604	-6.55124	-4.48179	-7.62669	-7.01961	-5.26981	-4.43222	-6.40905	-2.96591	-4.81792	-11.7001	-6.16172	-3.7862	-5.33974	-2.26168	-2.36617	-8.84658	-5.30762	-4.19831	-6.70972	-7.64613	-5.89805
375	-0.852377	0.32816	0.662885	3.77336	1.15797	1.45624	1.67563	3.89889	1.25651	375	-5.51983	-1.93567	-3.05052	-2.07264	-3.23205	-1.01456	-6.47828	-4.27446	-6.97675	-6.44307	-5.40636	-3.80197	-5.95836	-3.29963	-4.89853	-11.2036	-6.02473	-4.06613	-5.71565	-2.31448	-2.18771	-8.7586	-5.69099	-4.17769	-6.93969	-6.97198	-6.34426
376	0.763843	0.697703	-0.190968	3.17931	-1.04957	1.81661	0.913203	0.892424	2.3943	376	-5.45384	-2.14464	-3.24421	-1.20955	-2.1765	-1.33254	-6.29212	-4.85879	-6.93849	-6.51097	-5.22507	-4.26133	-6.01357	-2.60876	-4.63813	-11.4618	-6.3709	-4.30153	-5.64425	-1.62512	-1.59056	-8.76968	-5.34925	-3.88148	-6.93012	-6.72137	-5.97308
377	-4.24758	-2.08882	1.8963	2.00096	1.30258	2.18442	1.86744	2.55986	0.562225	377	-5.2556	-2.31327	-3.08479	-1.75686	-2.33795	-1.0869	-5.97365	-4.69458	-6.45415	-6.66045	-4.71748	-4.25004	-6.21224	-3.40655	-4.40587	-11.2564	-5.7748	-3.56742	-5.335	-3.11633	-1.90559	-8.0891	-5.82103	-3.61541	-6.79798	-5.69005	-6.16696
378	2.37569	0.788487	0.959716	-0.521016	-0.4841	2.89303	2.44992	1.10783	2.36976	378	-5.58884	-2.25793	-2.99738	-1.88491	-1.82447	-0.986512	-6.18957	-4.59272	-6.70162	-6.56909	-5.17481	-4.01911	-5.77537	-2.85738	-3.97541	-11.1252	-5.53072	-3.91117	-4.90066	-2.48912	-1.05861	-8.38851	-5.41999	-3.8896	-6.59116	-5.87451	-6.34102
379	0.674205	0.716849	-0.9958	2.82163	0.923145	1.2943	-0.357892	1.93638	0.353599	379	-5.59853	-2.05552	-2.82627	-1.30137	-2.17238	-1.33108	-6.28447	-4.58054	-6.81868	-6.256	-5.34842	-3.73847	-5.64975	-2.6602	-3.70145	-11.1557	-5.64044	-3.90953	-4.92711	-2.78076	-1.52115	-8.52597	-4.88709	-3.91533	-6.64294	-5.80002	-6.16823
380	-0.505308	1.26712	1.31337	0.138949	-1.36217	-0.896734	1.43619	1.45001	1.68324	380	-5.32149	-1.5857	-2.66599	-1.6888	-1.70508	-1.22132	-6.01533	-4.33555	-6.84211	-6.43407	-4.56046	-3.80338	-5.69611	-2.89813	-2.82143	-10.7849	-5.80703	-4.20519	-5.46803	-2.50828	-0.911015	-8.30912	-5.26897	-4.00622	-6.10875	-5.90894	-6.15182
381	-0.9878	0.364901	-2.97024	1.09838	-0.114048	0.368025	1.10605	3.60374	1.91064	381	-5.31327	-1.6218	-2.41287	-1.27706	-1.93434	-1.59131	-5.74341	-4.2981	-6.89068	-5.85585	-4.26359	-4.53991	-5.69646	-2.68096	-3.01627	-10.8295	-5.42975	-3.82053	-5.20452	-2.54062	-2.23322	-7.38232	-5.42961	-4.01437	-6.26279	-5.64631	-6.02174
382	3.0384	-0.0329141	1.42378	0.963193	0.25761	0.586252	1.42302	2.25934	1.23857	382	-5.23673	-1.86262	-2.2711	-1.41593	-2.14941	-1.25244	-5.81318	-4.40572	-6.2495	-5.59614	-4.37188	-4.14034	-5.68918	-2.62687	-3.6124	-10.6378	-5.1804	-3.48122	-4.89113	-1.97943	-2.10008	-7.94283	-5.08601	-3.70697	-5.95975	-5.85526	-6.02264
383	5.3661	0.163653	1.63759	0.957064	-1.65573	0.718584	2.11413	2.11204	-0.143399	383	-4.95986	-1.80927	-2.23814	-1.44557	-2.55207	-0.904189	-5.58518	-4.55417	-6.49291	-5.65542	-4.3487	-3.47042	-5.43525	-2.45214	-3.08266	-10.8605	-6.04052	-3.90442	-4.98205	-2.50512	-2.05591	-7.70667	-5.13845	-3.75829	-6.08675	-5.46244	-5.85737
384	2.794	-1.86772	1.92463	0.0451205	-0.796707	2.06071	0.860541	2.13588	1.58127	384	-5.59362	-1.26868	-2.72482	-1.45839	-2.0093	-1.44402	-5.22801	-3.96871	-6.97142	-5.40624	-4.15215	-3.6851	-5.45521	-2.30718	-2.97234	-10.5564	-5.74962	-3.36798	-4.6999	-1.69814	-2.17641	-7.62521	-4.69279	-3.58212	-5.73969	-5.49572	-6.01043
385	0.960215	0.166897	-1.13937	0.377432	0.264152	1.76975	1.98484	0.375242	0.406801	385	-4.50488	-1.73077	-2.64854	-1.41538	-1.88054	-0.691466	-5.64062	-3.91193	-6.65069	-5.51915	-4.44316	-4.4428	-5.12541	-1.9069	-2.71251	-10.4742	-5.50133	-3.76724	-4.3266	-1.36079	-2.05109	-7.84032	-5.00148	-3.78662	-5.8461	-5.22707	-5.77796
386	-3.44511	-2.18479	1.95999	1.46955	-2.76002	1.33017	2.51156	0.657131	0.0382293	386	-4.72266	-1.70749	-1.73364	-0.848379	-1.62758	-1.19259	-5.34411	-4.31548	-6.2886	-5.12566	-4.38946	-3.2735	-5.21145	-1.66605	-2.56097	-10.4812	-5.11211	-3.59883	-4.09981	-1.70413	-2.31761	-7.85126	-4.87192	-3.4909	-6.01674	-5.17098	-5.8377
387	-4.94167	1.62001	0.227613	-1.47973	-2.08926	1.99899	1.63521	0.707647	1.54652	387	-5.75872	-1.68103	-2.57736	-0.826198	-1.68196	-1.07432	-5.62634	-4.11678	-6.19474	-5.43502	-4.29923	-3.27264	-5.1526	-2.31916	-2.87654	-9.9963	-5.33455	-3.10933	-4.86673	-1.01085	-2.38578	-7.99397	-4.77666	-3.70077	-5.76279	-5.86572	-5.9675
388	1.18246	1.62511	2.26614	-0.939094	0.000573432	1.75751	-1.11894	-0.357391	1.71026	388	-5.97122	-2.16661	-2.40856	-1.13488	-1.43015	-1.12416	-5.49272	-3.79306	-6.09187	-5.02827	-3.28602	-3.61473	-4.78789	-1.87885	-2.65697	-10.2441	-4.9218	-3.14707	-4.23136	-1.53539	-2.21629	-7.51718	-4.27234	-4.05122	-5.34852	-5.54877	-5.86138
389	-0.641999	0.419192	-0.0875531	0.996054	-0.0142523	1.48898	0.459481	0.74585	-0.0976773	389	-5.78814	-2.11851	-2.23295	-1.04603	-1.69973	-1.26589	-5.61245	-3.82158	-5.76693	-5.17124	-4.06576	-3.29732	-5.05048	-1.68613	-2.29125	-10.426	-5.12937	-3.37566	-4.0576	-1.52892	-1.87201	-7.64353	-5.03614	-3.36297	-5.60227	-5.24752	-5.72731
390	-2.89726	0.667511	-1.30593	2.53427	-2.12602	0.878298	1.91096	-0.500304	2.74634	390	-5.42136	-1.98152	-2.75416	-0.684343	-1.86293	-0.806608	-5.88073	-3.57317	-5.73278	-4.73562	-4.36617	-3.31498	-5.03637	-1.36851	-2.38725	-10.4568	-4.63253	-3.56624	-3.89036	-1.16115	-2.30244	-6.77144	-4.69887	-3.39119	-5.3878	-5.13061	-5.70757
391	0.783084	-0.0656915	-1.80432	0.286009	-1.34374	-0.000398965	-0.0783863	1.50952	0.503804	391	-5.13257	-1.68189	-1.86003	-0.510877	-2.28267	-1.02247	-5.15267	-4.02427	-6.58162	-4.56568	-4.2538	-3.07913	-4.94999	-1.2337	-2.11064	-10.2475	-4.51661	-3.95137	-4.75819	-2.18411	-2.16677	-6.63687	-4.72153	-3.63716	-5.65531	-4.98225	-5.68185
392	-3.10963	1.39643	0.0597886	0.284326	-1.07084	0.274019	0.91664	1.12988	1.25566	392	-5.39196	-1.93227	-2.16761	-0.450474	-2.13214	-1.3967	-5.02871	-3.36565	-6.2721	-4.81328	-4.05887	-4.03942	-5.01071	-2.86051	-2.1969	-10.3641	-4.92738	-3.19132	-4.47019	-2.26273	-1.84301	-6.44031	-4.43145	-3.21378	-5.11779	-5.27571	-5.87056
393	1.84055	-0.665691	0.170838	1.46214	0.705059	-0.217458	-0.276773	-2.12776	1.15533	393	-5.57993	-1.83559	-2.2495	-1.63022	-1.69031	-0.995603	-5.57957	-3.71116	-6.52738	-4.39288	-3.81714	-3.3393	-4.95894	-1.92564	-3.29355	-9.78216	-4.57306	-3.38624	-4.56794	-1.59801	-1.67266	-7.54745	-4.89604	-3.28099	-5.34255	-5.07129	-5.78565
394	-2.39564	-0.128018	1.55479	-0.0145183	-0.373534	1.93275	0.218862	1.58324	0.729924	394	-5.54096	-1.49052	-1.36735	-1.70496	-1.74533	-1.90974	-5.14714	-3.31502	-6.43519	-3.97416	-3.74424	-3.70286	-4.4078	-2.44862	-3.41635	-9.64004	-4.29422	-2.94862	-4.62521	-1.30795	-1.55282	-7.67626	-4.53935	-3.70452	-5.24617	-5.18608	-5.71746
395	1.74313	-0.572628	1.88262	-1.21232	-1.10523	1.02464	1.12173	-1.08641	0.590791	395	-5.51288	-1.25538	-1.91753	-1.52842	-1.54064	-1.12551	-4.88451	-3.44037	-6.05444	-4.43382	-3.99798	-3.3231	-4.77978	-2.74806	-3.4177	-10.0353	-5.02051	-3.24961	-4.6153	-1.67591	-1.949	-7.32316	-4.6966	-3.6384	-5.30562	-4.96114	-5.21935
396	1.31551	-0.587642	0.698949	-0.411847	-0.991932	-0.408002	2.05546	2.93935	-0.228989	396	-5.30335	-1.65999	-2.04457	-1.72166	-1.82544	-0.493841	-5.04334	-3.14744	-6.25073	-3.84291	-3.44762	-3.02882	-4.10593	-0.795298	-3.59489	-10.0767	-4.75079	-3.55357	-4.61642	-1.85328	-1.73052	-7.44692	-3.90939	-3.22569	-5.0649	-4.73227	-5.37006
397	0.215475	0.227141	0.13904	0.195952	-2.07037	0.994613	1.45499	2.04122	0.214108	397	-5.49012	-1.40228	-1.98975	-1.57596	-1.38957	-0.894815	-5.11041	-3.04227	-5.9467	-3.97794	-3.84165	-3.29742	-4.8905	-0.938982	-2.78218	-9.95153	-4.93629	-3.36288	-4.65839	-2.04852	-1.45994	-7.38908	-4.39045	-3.42958	-5.54333	-5.26759	-5.58381
398	1.69922	-0.900695	2.56909	0.756176	2.3514	3.81382	0.0613641	1.97795	1.48838	398	-5.05514	-1.14226	-1.89587	-1.95128	-1.7455	-0.329089	-5.15001	-3.17191	-5.98663	-3.46168	-3.39008	-3.07667	-4.27565	-1.19449	-2.51599	-9.40758	-4.49916	-3.4346	-4.24419	-1.72727	-0.8303	-7.6039	-3.98233	-3.42992	-5.01997	-5.15877	-4.99478
399	2.25648	0.124865	-1.4836	-0.0984052	0.115962	0.681595	1.26461	1.40004	0.199632	399	-5.30166	-1.59729	-1.73021	-1.69176	-1.82957	-0.270468	-5.15081	-3.29976	-6.02848	-5.30746	-3.36866	-2.95574	-4.53007	-1.02899	-2.33359	-9.71052	-4.02564	-3.64057	-4.46884	-1.12905	-1.17396	-6.99372	-3.67186	-3.35042	-5.22394	-5.20582	-5.50226
400	4.72837	0.338729	1.85664	-1.4432	-1.99616	-0.070966	1.44626	-0.135536	-0.199631	400	-4.8052	-1.39701	-1.7649	-2.05557	-2.08933	-0.798696	-5.22237	-3.22624	-5.77232	-4.82812	-3.96476	-2.77772	-4.5462	-0.608969	-2.27341	-9.71522	-4.07458	-3.34284	-4.76442	-1.42663	-1.26464	-6.17018	-3.96138	-3.09919	-5.09415	-5.09503	-5.11258
401	-0.991392	0.558624	-0.011147	-0.78438	-2.95483	2.65297	1.92061	0.593117	-0.550142	401	-4.88523	-1.15823	-2.01356	-0.583491	-1.54086	-0.141955	-4.88985	-2.78422	-5.80123	-4.56501	-3.41656	-3.62606	-4.73553	-2.30672	-1.90062	-9.71429	-4.47236	-3.72558	-4.09549	-1.58732	-0.457018	-6.16552	-4.10745	-3.19071	-5.22874	-5.40148	-5.57834
402	4.07613	0.765269	0.832322	-2.16024	0.737209	1.64812	2.25235	2.64152	0.387683	402	-5.0916	-1.1797	-1.89752	-1.72978	-1.61711	-0.265045	-5.0339	-3.16681	-5.63819	-4.4534	-3.59637	-3.02501	-4.63106	-2.51129	-2.43609	-9.73154	-3.65368	-3.70371	-4.26464	-1.16177	-0.540881	-6.30994	-4.15404	-3.58366	-4.98145	-5.0064	-4.94314
403	1.59479	0.374656	-1.39197	0.196692	-1.80002	-0.393931	0.175233	1.13867	-1.11973	403	-4.56784	-1.22308	-2.31351	-1.67047	-1.13088	-0.574135	-4.63441	-3.33245	-5.5543	-4.02338	-3.47051	-2.95925	-4.73283	-2.47498	-2.23079	-9.21084	-3.86608	-2.96135	-4.88611	-1.05296	-0.79166	-7.47117	-4.2187	-3.01826	-5.20758	-5.03897	-5.39159
404	1.79241	2.2146	2.28551	-0.984903	-1.51261	0.185093	1.19807	1.31259	0.532769	404	-5.02317	-1.69631	-2.11536	-1.74949	-1.54155	-0.356982	-4.92572	-2.79305	-5.78877	-3.82275	-3.01647	-2.975	-3.81144	-2.16561	-2.19352	-9.11257	-4.12333	-1.19362	-4.56859	-1.2218	-0.358461	-7.16748	-4.11449	-2.82477	-5.04281	-5.5635	-5.22823
405	-0.186839	0.89147	0.9883	0.7222	-0.186601	-0.563539	-0.674766	1.74849	-0.938289	405	-4.78483	-1.34886	-1.34524	-1.21402	-0.830123	-0.243851	-5.00538	-2.56511	-5.68186	-3.44473	-3.53514	-2.89329	-4.34925	-2.42399	-2.49588	-9.5736	-3.81064	-1.70194	-4.29327	-1.1232	-0.134969	-6.18682	-3.98375	-3.20476	-5.46858	-5.24351	-3.25123
406	-3.00139	-0.313219	0.958147	-2.45774	-0.277507	0.228919	0.972085	-0.19642	0.244267	406	-4.88195	-1.17302	-1.73552	-0.792547	-1.10892	-0.534148	-4.3795	-3.01946	-5.70734	-3.0883	-3.5377	-3.1812	-4.56061	-1.6749	-1.8416	-9.52991	-3.93984	-1.51702	-4.55567	-1.07946	-0.555335	-5.83883	-3.78658	-3.51517	-4.70573	-5.08349	-3.09148
407	-3.66737	1.36126	1.1722	-1.18114	-0.666403	1.25382	1.86327	-0.0809385	0.842431	407	-4.98701	-0.898158	-2.04651	-0.939675	-0.654876	-0.743637	-4.8663	-2.74088	-5.09316	-3.1594	-3.17182	-2.50341	-5.96185	-1.62501	-1.966	-9.09658	-3.39909	-1.12786	-4.35765	-0.849528	-0.487739	-5.74091	-3.64659	-3.08112	-4.87104	-4.71297	-3.80671
408	1.18366	2.48874	-0.510369	0.289316	-2.52404	-0.320372	0.171624	1.5637	1.06479	408	-5.10263	-0.597769	-1.27999	-0.748989	-1.27643	-0.22403	-4.99101	-3.12013	-5.02055	-3.09807	-2.94426	-2.86169	-5.56853	-1.38539	-1.81875	-8.89675	-3.56203	-1.37609	-5.02761	-0.502935	-0.0492447	-6.19798	-4.22232	-3.02048	-4.91577	-4.78996	-3.46399
409	-1.8164	2.38257	1.64469	-1.69344	-2.27688	-1.58564	0.783992	1.72495	1.19855	409	-4.76416	-0.784348	-1.47094	-0.982069	-1.11651	-0.506459	-4.72317	-2.63636	-5.19294	-2.82179	-2.94397	-2.4066	-5.67325	-1.26058	-2.14767	-9.52035	-3.84057	-1.63955	-4.37987	-0.505761	0.132507	-5.95678	-3.79668	-2.83311	-4.50736	-5.19417	-3.55112
410	2.44891	0.331096	1.02817	-0.703141	-2.88009	1.67006	-0.553367	0.700348	0.395904	410	-5.0168	-1.32352	-1.35085	-1.01416	-1.43351	-0.132217	-4.35944	-2.47029	-5.36085	-4.92839	-2.51705	-2.81153	-5.63677	-1.07226	-1.43963	-9.18752	-4.32962	-1.96634	-4.74904	-0.650599	-0.413082	-5.87171	-3.6587	-3.20927	-4.94555	-4.82042	-3.48825
411	0.035501	1.84486	1.56423	-2.46841	-0.456036	0.378234	0.233755	-0.697428	-0.603183	411	-4.8228	-0.888199	-1.65376	-0.905836	-1.57155	-0.149823	-4.1593	-2.58948	-5.40595	-4.49195	-2.70789	-2.82703	-5.50757	-1.19386	-1.87829	-9.14919	-3.70034	-1.47896	-4.30317	-1.19813	0.402559	-7.07651	-3.71297	-3.00797	-4.54141	-4.78102	-2.96689
412	1.70875	-1.20831	-0.17672	-1.23579	0.670929	-0.477211	-1.4373	0.517644	0.0302607	412	-5.62338	-0.951207	-1.271	-0.536144	-0.773283	0.308274	-4.47334	-2.68633	-5.00023	-4.62324	-2.85118	-2.81003	-5.58623	-1.36993	-1.73451	-9.02747	-3.79891	-1.24564	-4.49087	-1.18338	-0.332558	-6.68764	-3.87096	-2.687	-5.01046	-4.51326	-3.46109
413	-2.39878	0.554556	0.738402	-2.5607	-0.874893	-3.45208	0.827225	2.01949	0.606117	413	-5.70127	-0.991516	-1.51684	-0.829018	-1.00178	-0.109083	-4.57847	-2.75929	-5.08068	-4.42515	-3.06028	-2.78525	-5.25624	-1.39815	-1.56817	-8.75441	-3.84965	-1.63252	-4.16386	-0.760029	0.310443	-7.31152	-3.80287	-2.86095	-4.91033	-4.35885	-3.62453
414	1.70954	0.763459	0.518097	0.289405	-1.47803	0.56498	-1.29755	2.07987	0.262811	414	-5.38792	-0.636979	-1.43653	-0.638785	-0.871917	0.200052	-4.69207	-2.60329	-4.78932	-4.39786	-3.02258	-2.4063	-5.39724	-1.00514	-1.06047	-9.16629	-3.77314	-1.72629	-4.54223	-1.17753	-0.501191	-7.09619	-3.76001	-3.25075	-4.5731	-4.7579	-3.72812
415	-0.376164	-0.77593	2.4724	-1.85059	-0.999197	0.945699	0.640626	0.990987	0.863744	415	-5.3863	-1.53522	-1.28757	-0.788249	-0.859866	-0.428734	-4.84965	-2.53241	-5.55854	-3.99369	-2.49663	-2.75385	-5.51828	-1.04023	-1.20193	-9.25429	-3.46581	-1.85033	-4.06128	-0.685047	-0.00697908	-6.10345	-3.39482	-2.80937	-4.69645	-4.74618	-3.09576
416	0.534188	2.41539	0.517095	-1.31741	-0.853524	-0.140348	0.740242	0.42024	0.580005	416	-5.62188	-1.28103	-1.52715	-0.768154	-1.09954	-0.644355	-4.4329	-2.65304	-5.06405	-4.19877	-3.85661	-2.38638	-5.28559	-1.05517	-2.91111	-8.65197	-3.53814	-1.13515	-4.03315	-0.181255	-1.50984	-6.92656	-3.78323	-3.27491	-4.60774	-4.37799	-2.89216
417	0.280832	0.301414	0.421804	0.976702	0.0798636	0.991228	0.044265	-0.692291	1.70678	417	-5.88727	-1.1948	-1.66708	-1.22099	-1.19659	-0.101046	-4.21547	-2.56745	-5.16313	-3.78756	-4.08467	-2.25587	-5.21007	-0.799974	-3.13058	-8.92757	-3.77151	-2.04852	-4.56213	-0.994605	-0.794856	-6.70654	-3.67126	-2.85224	-4.39475	-5.08839	-3.13035
418	0.131975	0.611152	1.18877	-0.254607	-1.17721	0.237571	-0.613544	1.57541	-0.786037	418	-5.82811	-1.15214	-1.14652	-0.737519	-1.3448	0.157566	-4.6876	-2.68027	-5.0672	-3.62429	-4.33196	-2.94872	-5.6588	-1.23912	-2.19106	-8.87533	-3.63278	-1.61139	-4.44295	-0.55535	-1.10364	-6.76084	-3.4612	-2.81384	-4.65659	-5.04899	-2.69859
419	-2.08236	1.80008	0.798395	-0.613382	-1.68681	0.791944	-0.596796	2.21653	-0.590472	419	-5.06619	-1.04538	-1.74248	-0.551059	-1.48831	0.182481	-5.48393	-2.9417	-5.01829	-4.30339	-4.21245	-2.51339	-5.13745	-1.18472	-2.47495	-8.95502	-3.89103	-1.02866	-4.25725	-0.299166	-1.11695	-7.08048	-3.21566	-2.55919	-4.72157	-4.56709	-3.08485
420	-2.12743	1.02715	1.92059	-0.148338	0.308038	1.06359	-0.0847127	-0.297291	1.09754	420	-5.67315	-1.11277	-1.72576	-0.806149	-0.947187	0.281533	-4.84358	-2.72429	-4.7487	-3.70133	-4.34555	-2.31671	-5.34685	-0.661227	-2.20654	-9.27986	-3.48994	-1.14626	-4.52006	-0.352875	-0.725209	-6.78798	-3.68804	-2.84322	-4.20969	-4.35425	-2.35944
421	0.182223	1.47272	0.953786	-0.828441	-0.517292	-0.647634	-0.654657	2.82489	1.64036	421	-5.60219	-1.29427	-1.84332	-0.784382	-0.306773	0.325277	-5.17353	-2.68308	-4.81215	-3.13039	-4.23174	-2.60242	-5.47222	-1.2799	-1.9875	-9.1646	-2.9192	-0.988828	-4.93989	-0.69118	-0.504149	-6.94577	-3.1813	-2.50997	-4.30973	-4.53467	-2.99487
422	-4.89424	1.17858	2.7936	-1.92859	-2.41843	0.299398	-0.0487701	-0.529908	0.0178956	422	-4.993	-1.74822	-1.41876	-0.804032	-0.548536	0.0351399	-5.30132	-3.17676	-5.06112	-3.32943	-4.1966	-2.19001	-5.24606	-1.03418	-2.20519	-8.646	-3.78179	-1.2528	-4.18808	-0.538485	-0.622789	-6.92123	-3.57343	-2.44478	-4.7415	-4.42708	-2.81243
423	1.35701	1.4093	0.099909	-0.975679	-0.391037	-0.0844231	0.207411	0.144343	1.12529	423	-5.84188	-0.918519	-1.40747	-0.307916	-0.500915	0.252851	-4.71949	-2.95699	-5.17579	-3.70693	-4.22638	-2.8817	-5.74203	-0.876619	-2.06537	-8.44803	-3.60573	-1.13546	-4.73518	-0.488609	-1.0381	-7.04325	-2.95007	-3.06335	-4.39066	-4.26532	-2.74559
424	-2.37678	-1.01846	2.18686	-1.80279	-2.22666	1.20597	1.15606	-0.627432	-0.289109	424	-5.29895	-0.969948	-2.16388	-0.773701	-0.529525	-0.350647	-5.00628	-2.32872	-5.16297	-3.19488	-3.88	-2.28306	-5.44001	-0.700399	-1.95172	-8.82491	-3.71488	-1.17598	-4.59778	-0.148771	-0.717958	-7.02242	-3.46836	-2.84206	-4.51132	-4.37888	-2.44811
425	0.754275	-1.75546	0.360411	0.680389	-0.885476	1.92452	0.0928042	-2.64502	0.0597376	425	-4.95439	-0.972805	-1.45259	-0.742871	-0.794218	0.480575	-5.03366	-2.59059	-4.98523	-2.79699	-3.61094	-2.98699	-5.01877	-0.549138	-1.91007	-8.57524	-3.46105	-1.0638	-4.88872	-0.749776	-1.09339	-6.77906	-3.05182	-2.48547	-4.26355	-4.68593	-2.53325
426	1.09002	-1.26335	0.568429	-0.864667	-1.09756	1.87467	0.810903	-0.659897	0.148594	426	-5.22182	-1.12201	-2.11357	-0.588164	-0.910103	0.291306	-4.83073	-2.48828	-4.6633	-4.70349	-3.92883	-2.82186	-5.01022	-0.608464	-1.24986	-8.96605	-3.64216	-1.42976	-4.85655	-0.329829	-0.843944	-6.80272	-2.85808	-2.6421	-4.90138	-4.14381	-2.88566
427	-1.47121	3.05065	-1.16447	-1.64028	-1.38211	-0.34379	2.56143	1.50018	-0.662103	427	-5.72038	-0.93497	-1.76641	-0.146778	-0.516628	-0.275492	-4.81593	-2.63722	-4.78034	-4.4104	-3.47509	-2.84559	-5.01685	-0.540639	-1.14012	-9.18894	-4.02048	-0.992409	-4.67987	-0.145704	-1.23893	-6.50847	-3.25916	-3.32307	-4.88947	-4.28053	-2.40505
428	0.605433	0.293925	0.20729	-3.06651	-0.455566	0.728099	-0.327052	0.283519	-0.395612	428	-5.64973	-0.417072	-1.40835	-0.840589	-1.32163	-0.713733	-5.10834	-2.43526	-4.77634	-4.37698	-3.87877	-2.87273	-5.06145	-0.54605	-1.42304	-9.17487	-3.50287	-0.854372	-4.45048	-0.120167	-0.554381	-6.53768	-3.34108	-2.62967	-4.54953	-4.08074	-2.82071
429	1.5792	0.138569	0.413609	-0.861853	-1.93313	2.05002	0.857375	1.35526	1.18045	429	-5.09773	-0.740372	-1.10595	-0.708993	-1.2819	0.459886	-4.71334	-2.43834	-4.84021	-3.86187	-4.01536	-2.40685	-5.43525	-0.364654	-1.48818	-8.69408	-3.96507	-1.19254	-4.91419	-0.327913	-0.831016	-6.82237	-2.98208	-2.69305	-4.30291	-4.33637	-2.48018
430	-0.462391	1.42693	0.752735	0.523787	0.229336	-0.340692	1.81285	0.512884	-0.322571	430	-5.38429	-0.407288	-1.65858	-0.44341	-1.27123	-0.456937	-4.79307	-2.379	-4.75537	-4.27049	-3.81103	-3.17544	-5.14473	-0.182797	-0.954057	-9.58064	-3.58393	-1.00012	-4.87342	-0.0843774	-0.630183	-7.27967	-2.98059	-2.69921	-4.44258	-4.32646	-2.83495
431	1.10095	0.232301	0.53929	-0.388571	-1.72795	0.272686	-2.09717	0.100109	0.599817	431	-5.03557	-0.687767	-1.26088	-0.502251	-0.847202	0.0710161	-4.49498	-2.62819	-4.47662	-3.7088	-4.01314	-2.93959	-4.76385	-0.700915	-1.57656	-9.04844	-3.63503	-1.41475	-4.92279	0.0466613	-1.00623	-6.78824	-2.93281	-2.21778	-5.2029	-4.67747	-2.39025
432	-2.13793	-0.18664	1.71129	-1.89462	1.30566	2.9158	0.244296	0.938509	1.58014	432	-5.67199	-1.29655	-1.4456	-0.311197	-0.717358	0.709017	-4.29716	-2.23634	-4.34675	-3.42539	-4.04647	-2.74432	-5.21395	-0.415789	-1.52299	-9.1025	-2.90646	-0.679638	-4.7502	-0.163911	-0.52948	-6.52697	-2.77452	-3.07642	-4.49951	-4.63176	-2.2897
433	-0.396924	0.179768	0.68182	-0.957253	-0.986803	-1.42839	-0.745267	0.37525	1.94695	433	-6.12941	-1.01267	-0.944942	0.191646	-0.845177	0.0946293	-4.97452	-2.1985	-4.79091	-3.24861	-3.22631	-2.7844	-5.03337	-0.519549	-1.47632	-8.45081	-2.12203	-1.44777	-4.72835	-0.391923	-0.346392	-7.27087	-3.2637	-2.66874	-4.10419	-4.12831	-2.15525
434	-3.86197	-1.66957	1.3368	-0.024239	0.973086	-0.0464558	-0.213908	0.682983	-1.71455	434	-5.88548	-0.928982	-1.40267	-0.587296	-0.0849369	-0.372408	-4.51633	-2.3912	-4.69776	-3.62903	-3.38008	-2.90428	-5.0081	-0.451314	-1.04393	-9.49653	-2.74616	-1.09472	-4.62758	0.121643	-0.571745	-6.99559	-3.10325	-2.30033	-4.66242	-4.32331	-2.37408
435	-0.0591143	0.0636745	1.29007	0.247874	-0.235906	0.430734	-1.43933	0.0908335	-0.699251	435	-6.63518	-0.490237	-1.13739	-0.568014	-0.241925	0.590029	-4.32999	-2.173	-4.44509	-3.54902	-3.44934	-2.83114	-5.2436	-0.212312	-0.709365	-8.77344	-1.99245	-0.986621	-4.47957	0.198446	-0.861213	-7.03703	-3.02748	-2.52094	-4.1917	-4.63796	-1.98078
436	-0.379089	-0.317544	2.0147	0.00987517	-0.373756	1.6115	-1.54083	0.884963	0.0792914	436	-5.55534	-0.743381	-1.04758	-0.500032	0.0853745	0.54873	-5.12366	-2.52979	-4.31933	-3.15031	-3.23123	-2.76684	-4.94984	0.0706618	-0.815631	-9.34948	-2.26016	-1.04083	-4.36527	0.318944	-0.523755	-6.65173	-2.77168	-2.1656	-4.55206	-4.26432	-2.27601
437	-1.85101	0.997538	2.64308	-0.418994	-0.897731	-0.0767285	-0.0261989	-0.796993	-0.879817	437	-6.3266	-0.450439	-1.64409	-0.412721	-0.606145	0.3258	-5.65806	-2.40241	-4.26502	-3.03836	-3.69374	-2.05569	-5.41676	0.348921	-0.716886	-9.37639	-2.78984	-1.36573	-4.86283	0.388799	-0.277985	-6.85068	-3.099	-2.87008	-4.90006	-4.17008	-1.9379
438	1.35368	0.711064	0.94183	-0.614137	-1.7913	1.88667	-2.15581	1.35575	-0.0459371	438	-5.94555	-0.39306	-1.6763	-0.446309	-0.27374	0.918267	-4.78164	-2.25855	-4.44914	-2.54135	-3.3951	-2.13243	-4.62713	-0.339605	-0.294281	-9.13775	-2.65688	-0.953534	-4.52438	0.255892	-0.399439	-6.72806	-2.23386	-2.48059	-4.59717	-4.38241	-2.17817
439	-0.111066	0.821547	0.0275437	-0.362858	-1.91668	-0.427756	1.91832	0.504503	1.95884	439	-5.89392	-0.435203	-1.24026	0.29824	-0.323464	-0.472753	-5.7065	-2.55749	-3.80505	-2.68485	-3.03848	-2.22658	-4.98927	-0.0597573	-0.824744	-9.15174	-2.64348	-1.15415	-4.69312	0.359094	-0.275886	-7.15727	-3.16341	-2.18311	-4.27806	-4.8354	-2.67635
440	-0.916173	0.32378	-0.562236	-0.71084	-2.66824	-0.463197	0.0997872	-0.0885921	0.905041	440	-5.80412	-0.253833	-1.38947	-0.18214	-0.681492	0.801459	-5.20587	-2.54528	-4.19028	-2.91411	-3.92922	-2.46829	-5.47979	0.404694	-2.97871	-9.13181	-2.04332	-0.748831	-4.58449	0.157625	0.206019	-6.64813	-2.71585	-2.72371	-4.74168	-4.25026	-2.32347
441	0.440035	0.929655	0.390686	-2.25384	-1.71629	-1.40463	0.326228	-0.370518	0.969412	441	-5.54857	-0.40502	-1.09649	0.0597218	-1.1495	0.15535	-5.20723	-2.56502	-4.38163	-2.98986	-3.45766	-2.71177	-5.41268	-0.12101	-2.39964	-9.24197	-2.43549	-1.31799	-5.06317	-0.493544	-0.0221489	-7.02443	-2.80202	-2.61798	-4.73027	-4.29819	-2.0874
442	1.48892	-0.82535	-0.0355741	-1.19101	-3.20373	-0.049886	-1.00317	0.418268	-0.253795	442	-5.77339	-0.614327	-1.5513	-0.841589	-0.761053	0.331409	-5.07985	-2.44303	-4.07415	-4.52953	-3.53253	-2.58883	-5.06754	-0.076247	-2.19183	-9.41338	-2.39552	-0.925607	-4.9689	0.168118	-0.334848	-6.97467	-2.48827	-1.06583	-4.42917	-4.07433	-2.51378
443	0.15991	1.03946	1.20962	-0.865829	-0.453669	0.310064	1.71209	2.31341	0.183035	443	-5.58522	-0.0762054	-1.58931	-0.575272	-0.650833	0.507201	-5.30949	-2.53275	-3.99025	-3.99647	-3.43472	-2.49112	-5.25801	0.169366	-1.89782	-9.22123	-2.04419	-1.24066	-5.257	-0.541504	0.690452	-6.97454	-2.75573	-2.26854	-4.43603	-4.04657	-2.50156
444	-0.0844215	-1.17499	0.701071	-0.897816	-1.56361	-3.07735	-0.968005	-1.06756	-1.05152	444	-5.85142	-0.763261	-1.7018	-0.60411	-0.556032	0.326704	-4.97523	-2.31084	-4.35538	-4.22295	-3.31112	-2.41959	-5.2615	-0.217963	-2.16715	-8.99351	-2.61741	-1.22053	-4.91349	-0.0726869	-0.124331	-6.88266	-3.03609	-1.07857	-4.32989	-4.2569	-1.93332
445	-0.795717	2.35974	0.407034	-1.52165	-1.32176	0.200862	0.8947	0.516748	0.461418	445	-5.641	-0.759099	-1.40119	-0.300118	-0.374066	0.686937	-5.12195	-2.22473	-4.41731	-4.38522	-3.12053	-2.36457	-5.30162	0.352116	-1.508	-9.51178	-2.14796	-1.04195	-5.17138	-0.0946784	0.626385	-6.5901	-2.81164	-1.27612	-4.73454	-4.28713	-2.03317
446	1.87377	1.22429	-1.62028	-2.22186	-1.32234	-3.12122	-0.654349	0.213662	-0.242799	446	-5.6952	-0.680588	-1.34857	-0.793976	-0.479125	0.638248	-5.07014	-2.08532	-4.21585	-4.00595	-3.19766	-2.39361	-5.08195	0.328049	-1.40709	-9.4505	-2.45509	-1.13616	-5.22019	0.0829305	-0.243352	-6.58979	-2.62454	-1.36681	-4.5463	-3.72614	-2.6321
447	1.7459	0.906696	1.60304	-2.00473	-1.47855	-0.850598	-1.70475	2.2886	0.411825	447	-5.6078	-0.813133	-1.83442	-0.364529	-0.374105	0.0308248	-5.13437	-2.57708	-4.26883	-3.9371	-3.3826	-2.45495	-4.68686	0.512982	-1.1109	-9.56566	-2.35448	-1.11501	-5.02119	0.062568	0.509511	-5.48621	-2.98428	-0.79743	-4.57564	-4.39161	-2.18197
448	0.840868	-1.90362	0.233057	-1.45674	-1.76619	0.227598	-0.630843	0.211056	0.8342	448	-5.49531	-0.35521	-1.60211	0.205999	-0.236881	0.289091	-5.15132	-2.18352	-4.36457	-4.17171	-3.16257	-2.60583	-4.61272	0.108843	-1.3513	-9.26398	-2.02506	-0.804404	-5.47138	-0.333135	-0.195505	-6.47914	-2.60777	-0.855402	-4.50499	-4.21954	-2.22479
449	1.96401	-2.65326	2.51456	-1.62898	-1.96621	1.73189	-0.410945	-0.227599	0.0730809	449	-5.78215	-1.07934	-1.10462	-0.759067	0.0786002	0.0267933	-5.10703	-2.33607	-4.37364	-3.712	-3.23443	-1.86308	-5.03337	0.440044	-1.1853	-9.40741	-2.24608	-0.719868	-5.15874	-0.1848	-0.29387	-6.93846	-2.54657	-0.619346	-4.35501	-3.85814	-2.07747
450	1.50803	0.0992365	0.282308	-2.4039	-2.37287	-1.50376	-0.329833	1.22908	-0.679724	450	-6.03411	-0.924644	-1.67947	-0.744941	0.100172	0.673726	-5.21364	-2.02402	-4.0879	-3.32847	-2.80092	-2.74718	-4.8554	0.577775	-1.41239	-9.875	-2.58915	-0.893431	-5.17956	0.128303	-0.00507092	-6.71143	-2.48488	-1.34754	-4.6388	-4.13038	-2.38327
451	0.281688	0.862807	1.16438	-1.56676	-4.09245	-0.478865	-2.07735	-0.312994	-0.985435	451	-5.43156	-0.907338	-1.89704	-1.07958	-0.211825	0.599953	-5.35804	-2.42673	-4.71107	-3.11253	-3.16444	-2.58717	-4.35018	0.452489	-0.690223	-9.05702	-2.11676	-0.956951	-5.07172	-0.116622	0.724799	-6.74135	-2.71675	-0.932346	-4.43214	-3.84616	-2.05829
452	-0.177492	-2.65092	0.280728	-0.410338	-2.9349	-1.66986	-0.986244	1.03371	0.243801	452	-5.27157	-0.326036	-1.84639	-0.7552	-1.0215	0.501149	-4.94697	-2.504	-4.19482	-3.25043	-2.6221	-2.77451	-4.51926	0.818643	-0.894656	-9.38716	-1.9483	-0.155591	-4.32437	-0.307215	0.324897	-6.78635	-4.02169	-2.32001	-4.49866	-3.95995	-2.31047
453	0.408141	1.00303	0.959035	-3.46779	-2.07008	-2.89697	0.120607	1.07315	-0.0971615	453	-5.97388	-0.176498	-0.991135	-1.43213	-0.472801	0.240278	-5.20294	-2.68036	-4.43781	-2.75169	-2.70981	-2.08332	-5.023	0.651025	-0.845717	-9.20532	-1.948	-0.109591	-4.78687	-0.256285	0.551299	-6.79375	-3.50891	-2.19889	-4.47885	-4.10397	-1.9758
454	1.88689	2.49776	0.268855	-0.168651	-2.44725	0.326262	0.488477	-0.940702	0.25346	454	-5.86422	-0.499898	-0.773761	-1.4705	-0.0884055	-0.0897401	-5.64002	-2.56594	-4.07637	-3.09065	-2.76568	-2.22813	-5.32694	0.662885	-0.873296	-9.28202	-3.52452	0.172881	-5.26053	-0.446926	0.360866	-6.63287	-3.42792	-1.74492	-4.28593	-3.60912	-1.2384
455	1.57369	0.0587992	3.20872	-0.623261	-1.75116	-1.61033	1.01009	0.940484	0.829236	455	-5.62826	-0.512683	-0.558695	-0.96849	0.323762	0.242928	-5.84821	-2.83048	-4.37161	-4.50717	-2.36545	-2.04179	-5.06204	0.0119763	-0.598084	-9.46417	-3.44859	0.0289103	-5.35122	-0.996761	-0.097044	-7.11097	-4.22381	-2.17383	-3.98685	-3.88036	-1.65425
456	-0.442535	0.567482	0.371915	-0.394892	-2.59183	-1.86878	1.68311	2.41176	1.70422	456	-6.04405	-0.752508	-1.17103	-0.894211	-0.0784109	0.200326	-6.0837	-2.77721	-4.42548	-4.61199	-2.63396	-4.28254	-6.84858	-0.126378	-0.695913	-9.71772	-3.80088	-1.6195	-5.60367	-0.775217	0.273472	-7.51358	-4.17748	-2.29879	-4.27483	-3.60834	-1.31825
457	-0.680031	1.75571	2.36103	0.340439	-0.00568753	2.4424	1.74367	0.220215	-0.902279	457	-6.14353	-0.653735	-1.44727	-1.49583	-0.898867	0.0554305	-5.96421	-2.84352	-4.49232	-5.18312	-3.11561	-4.32287	-6.75069	-0.112878	-1.36012	-9.84656	-4.32971	-1.96707	-5.7685	-1.05263	0.356954	-7.01823	-3.9669	-2.5741	-4.36083	-3.72695	-3.26393
458	-0.698175	1.07358	-1.05882	2.20979	0.783559	0.967414	2.499	1.03212	-0.91785	458	-6.10809	-0.844873	-1.24435	-1.43581	-0.409955	-0.42395	-6.52033	-3.29203	-4.74103	-4.40303	-3.23965	-4.43172	-6.65232	-1.47176	-2.74207	-10.3587	-4.69477	-1.91726	-5.53855	-0.850678	-0.4044	-7.58601	-4.36354	-2.36168	-4.23739	-3.95872	-3.32429
459	-1.943	-0.68849	-0.554671	3.24962	1.62461	3.62166	0.893687	1.37974	1.3696	459	-5.78143	-0.97822	-1.88193	-1.30961	-0.921898	-1.56113	-6.35501	-3.18619	-4.89237	-5.11613	-2.77105	-4.66661	-7.19578	-1.7512	-3.22253	-10.1424	-4.36927	-1.71738	-5.81159	-1.18769	-0.291867	-7.40754	-4.09988	-2.64443	-4.71132	-4.26677	-3.14605
460	1.34488	-0.1546	-0.840021	2.62247	-0.0954512	1.05709	3.16148	2.17703	3.62939	460	-6.19382	-1.23733	-2.02467	-1.34692	-0.865701	-0.347599	-6.35446	-3.87721	-5.32747	-5.20629	-3.60031	-4.74205	-7.71653	-1.3664	-2.93015	-10.0789	-4.29554	-1.70119	-5.54515	-1.52892	-0.495228	-8.02496	-4.61143	-2.83548	-4.34213	-4.21557	-3.88687
461	-0.572532	-0.212207	-0.852294	2.90331	1.88486	1.11071	4.18957	2.03624	4.40865	461	-6.45084	-0.726534	-1.25652	-1.22502	-1.0182	-0.301205	-6.26904	-3.89262	-5.16721	-4.22956	-3.15203	-3.84681	-7.38575	-1.82296	-3.00445	-10.8041	-4.5028	-1.85896	-5.67404	-1.8126	-0.428061	-7.32844	-4.45653	-3.18271	-4.18191	-4.32887	-3.69044
462	-0.161485	1.27766	0.142211	0.740377	0.398315	2.86071	3.8082	2.97786	2.69166	462	-6.81836	-1.28602	-2.2482	-1.41402	-1.0638	-0.393133	-6.81018	-3.74809	-5.55573	-4.63904	-3.07111	-4.21403	-7.4653	-2.15376	-3.16559	-10.8737	-4.68279	-1.91594	-5.83938	-1.54784	-0.399534	-7.84829	-4.35038	-3.12406	-5.08521	-4.75152	-3.73287
463	-1.56875	-0.833544	-2.1654	1.12129	2.1156	1.34585	3.63217	3.13003	3.61575	463	-6.78192	-1.06457	-1.34472	-2.00527	-0.899449	-0.554837	-6.53691	-3.41978	-5.45362	-4.70751	-3.84465	-4.31224	-7.27759	-1.97247	-2.91863	-11.2242	-4.86473	-2.30666	-5.68274	-1.87843	-1.12688	-7.81797	-4.59555	-3.10944	-4.8823	-4.59544	-3.85585
464	0.022013	1.82357	0.214531	2.70566	4.66942	3.96976	4.91785	2.36529	6.37146	464	-6.65814	-1.23831	-1.65205	-2.43623	-1.25889	-0.724968	-6.60423	-3.39508	-5.83265	-4.6807	-5.48989	-4.5532	-7.93758	-2.56193	-2.95045	-11.061	-4.7881	-2.43084	-5.8068	-1.96022	-0.639008	-8.3091	-4.53816	-3.2016	-6.85233	-5.86821	-4.22515
465	0.210123	-2.88492	-0.220573	1.9273	6.81823	3.41921	4.97587	4.14276	4.2344	465	-6.64218	-1.73658	-1.90939	-2.4658	-0.935547	-0.564291	-6.7739	-3.46734	-5.90354	-6.77709	-5.508	-4.96907	-8.24132	-2.23062	-2.70672	-10.9145	-4.9782	-1.86322	-6.22756	-2.14736	-0.617541	-8.50892	-4.30048	-3.40411	-6.41894	-5.87652	-3.65256
466	0.764374	-1.264	3.24218	5.68793	4.22535	1.61328	3.39086	4.32595	4.64442	466	-6.19506	-1.71371	-1.98263	-2.85429	-1.803	-1.35442	-6.70798	-3.79435	-6.16956	-6.39811	-5.41182	-4.9151	-7.97789	-2.65132	-3.85752	-11.3876	-5.34524	-2.6235	-5.85217	-1.78692	-1.10474	-8.35938	-4.99603	-3.47369	-6.6282	-6.10276	-3.93318
467	-1.06691	-0.435525	-0.51017	3.58068	4.03751	4.34879	4.92076	1.73657	3.7358	467	-6.34013	-1.452	-1.69928	-2.21759	-1.75909	-1.18492	-7.05296	-4.36055	-6.47044	-5.86208	-5.33489	-4.71843	-8.18163	-2.78075	-3.38231	-11.2987	-4.89744	-2.95626	-6.30049	-2.01469	-1.16905	-8.092	-4.7064	-3.52171	-6.46988	-5.69684	-3.89949
468	0.459538	-0.18874	1.11046	4.30393	4.49062	0.246824	3.56106	3.68637	5.21631	468	-6.75183	-1.39392	-2.36022	-2.68304	-1.11496	-0.753605	-6.92659	-4.02377	-6.66976	-6.33682	-5.78882	-4.66877	-8.30002	-2.33696	-2.77943	-11.6804	-4.9187	-2.8981	-7.35263	-1.88787	-1.41606	-8.31142	-4.61095	-3.44146	-6.4359	-6.0346	-3.98222
469	1.10923	-1.55317	0.511639	2.87959	3.49149	4.0786	5.51742	5.4105	6.65846	469	-7.15134	-1.51665	-2.27978	-2.03919	-1.42478	-1.75412	-7.3234	-4.13046	-6.78417	-5.92696	-5.78493	-4.35849	-8.3421	-2.57094	-2.87509	-12.1797	-5.03493	-2.49739	-7.90053	-2.35755	-1.29393	-8.40114	-5.16871	-3.60012	-6.62868	-6.06655	-3.95017
470	1.52112	1.2221	0.516679	2.9955	7.28091	2.45269	5.24611	5.23776	7.44819	470	-7.53298	-1.44994	-2.66787	-2.61366	-1.19948	-1.18231	-7.01053	-4.5727	-7.23552	-6.66864	-5.99655	-4.77736	-7.79495	-3.06779	-3.37224	-11.6099	-5.28826	-2.33342	-7.61442	-3.2409	-1.92787	-8.86871	-6.08637	-3.75742	-6.805	-5.95565	-4.17384
471	0.295561	1.75612	1.65615	4.54171	5.24062	4.57197	6.5508	3.40485	7.023	471	-7.2219	-1.74912	-2.05321	-1.97983	-2.40141	-1.7465	-7.30176	-4.43998	-6.91597	-6.1463	-5.32952	-4.92794	-8.4368	-2.88829	-3.71654	-11.8795	-5.39116	-3.20991	-7.51607	-3.38018	-1.39421	-8.8581	-6.15327	-3.49755	-6.4753	-6.2654	-4.20968
472	-0.442993	-0.126199	0.841485	3.94882	3.81786	4.71687	4.97655	3.96411	6.4555	472	-7.25959	-2.15547	-2.59668	-2.15028	-1.51706	-1.8451	-7.56358	-4.84011	-6.7235	-6.4594	-5.64091	-5.36834	-8.42588	-3.61387	-5.60204	-12.5836	-5.27867	-2.96236	-6.81032	-2.67037	-1.73109	-8.92765	-5.80665	-4.00482	-6.46267	-6.31801	-4.02545
473	0.168259	-0.112896	1.01609	5.4336	5.43517	2.45429	6.05886	4.19336	6.19333	473	-7.08383	-1.72149	-2.55998	-2.36698	-2.63834	-2.06809	-7.76653	-5.02689	-6.90682	-6.05949	-6.12743	-4.89022	-8.29687	-2.91516	-5.17143	-12.2009	-5.31353	-2.79928	-6.92304	-3.29207	-3.36266	-8.9211	-6.09837	-3.54943	-6.83016	-6.34881	-3.95137
474	-1.44062	1.00918	1.44823	4.16586	4.24334	2.7279	5.10648	4.49304	6.51986	474	-6.46224	-2.04614	-2.99828	-2.71547	-2.01093	-1.68942	-7.60384	-4.90082	-6.94837	-6.10665	-6.15997	-4.99957	-8.09663	-3.49683	-5.36661	-12.3553	-5.34234	-2.92132	-7.73742	-3.04628	-3.42868	-9.30369	-5.99114	-3.75183	-6.66004	-6.07207	-4.04946
475	1.67979	-0.775716	1.70419	4.13161	2.88154	5.91656	8.31088	0.956465	6.19402	475	-6.68319	-2.43463	-2.52036	-2.62138	-2.41937	-2.04257	-7.68267	-4.93799	-6.99588	-8.16843	-5.78587	-5.55764	-8.5926	-3.63738	-5.14588	-14.1032	-5.68383	-2.97156	-7.31665	-2.97341	-2.79551	-8.86366	-6.23616	-4.05081	-6.6137	-5.95135	-3.91987
476	0.905685	0.976283	1.46567	4.47114	3.84613	3.43619	5.02471	3.13232	5.8408	476	-6.788	-2.26892	-2.75012	-2.31235	-2.22663	-1.47107	-8.20178	-5.08936	-7.27492	-7.44169	-6.13102	-5.2142	-8.68365	-3.77323	-5.43498	-13.4443	-6.16529	-2.81893	-7.37076	-3.70727	-3.52194	-9.53114	-6.06304	-4.32865	-6.77229	-6.75862	-3.84353
477	-0.308979	1.16101	-0.00765727	2.43215	3.02459	2.72829	7.10994	3.5503	7.83382	477	-6.82105	-2.3444	-2.68204	-1.9567	-2.30366	-2.12477	-7.30884	-5.1803	-7.41226	-7.9261	-6.03942	-6.9331	-8.77269	-3.44869	-5.29496	-14.0331	-5.42834	-2.95488	-7.53796	-3.45348	-3.56392	-9.30664	-5.91257	-3.85327	-7.02663	-6.55794	-4.00747
478	1.63177	0.922283	-0.349569	4.46982	3.52522	3.9492	6.73846	3.03818	6.95919	478	-7.5511	-2.00001	-2.59998	-2.33759	-2.0384	-1.69804	-7.85899	-4.71407	-7.10367	-7.51873	-6.02377	-7.00633	-9.60687	-3.5709	-5.23836	-14.0489	-5.6471	-3.09369	-7.62586	-3.37002	-3.39849	-9.47307	-6.02509	-4.23712	-6.63986	-6.17714	-5.36285
479	0.729482	-1.06197	1.70723	3.60368	5.08863	2.46129	5.84217	3.04049	5.61399	479	-7.5323	-2.38785	-2.65546	-3.33305	-2.12205	-2.74228	-9.07916	-5.07729	-7.68191	-7.38155	-6.11099	-6.59693	-9.59831	-3.46289	-5.49033	-13.7937	-5.73103	-3.33938	-6.98147	-2.78679	-3.50339	-9.43012	-6.24302	-3.89193	-6.90886	-6.68256	-6.09227
480	-3.25743	-1.18006	0.99316	5.36448	3.29741	5.42618	8.24475	3.81908	5.96571	480	-7.76783	-2.59151	-3.27697	-3.10139	-2.33518	-1.86931	-8.19423	-5.20628	-7.9342	-7.46606	-5.96987	-6.84467	-9.7136	-3.17597	-4.9536	-13.9061	-6.19216	-3.45172	-7.78618	-3.72754	-3.71467	-9.55467	-5.92077	-4.32722	-6.90027	-6.2982	-5.42642
481	4.38559	-1.03667	0.580442	3.70402	4.16709	4.85989	5.61615	2.53655	5.5348	481	-7.11665	-2.41931	-2.70722	-3.22044	-2.79761	-2.12374	-8.53477	-5.07803	-7.59965	-7.86257	-6.12935	-6.72303	-9.68194	-3.87398	-5.30205	-14.0193	-5.7404	-3.05111	-7.68633	-3.49541	-3.44175	-10.0577	-6.0318	-4.44733	-7.24003	-6.47847	-6.2549
482	1.17921	-0.0196943	-1.25229	1.68839	1.56269	5.37696	6.15336	2.57825	5.79411	482	-7.94979	-2.68042	-3.04463	-3.46291	-2.95131	-2.3905	-8.79609	-5.22655	-7.4735	-7.36939	-6.79411	-6.98165	-9.46822	-3.41501	-4.70649	-14.5295	-6.0837	-3.39248	-7.73258	-3.9681	-3.76523	-9.57277	-7.04223	-5.85044	-7.17749	-6.85864	-5.45548
483	2.72705	1.80333	-0.866287	4.95911	2.69982	3.77625	6.07299	4.66654	5.55998	483	-7.78937	-2.24332	-3.10938	-2.96007	-2.82417	-2.56423	-8.14879	-5.33585	-7.709	-7.17666	-7.15733	-7.41442	-9.85018	-3.88942	-4.88431	-14.3573	-6.05054	-4.16451	-7.35928	-3.60388	-3.15009	-9.8248	-6.74514	-5.65642	-6.7668	-6.64787	-6.0096
484	4.36969	-0.00383065	-1.90371	4.98144	1.88194	3.71321	6.24236	5.9812	6.09457	484	-7.2112	-2.78023	-3.09631	-3.0621	-2.4677	-2.70038	-8.28808	-5.11992	-7.86862	-7.65993	-6.78879	-7.24754	-9.98745	-4.44551	-4.82732	-14.4909	-5.72152	-3.6866	-7.67504	-3.17651	-3.77334	-9.83423	-6.59441	-5.8028	-6.48702	-6.36468	-5.8387
485	2.74909	0.443855	1.81904	3.15725	3.51773	3.01951	6.5045	3.69608	6.12644	485	-7.30971	-2.25651	-3.17951	-3.42702	-1.85319	-2.25585	-8.48815	-5.47885	-7.60816	-7.57901	-6.75808	-7.93332	-9.35485	-3.67105	-4.98928	-14.1324	-7.29266	-3.69275	-7.8137	-4.18232	-3.50701	-9.62117	-6.65043	-5.4993	-6.91126	-6.58773	-5.65718
486	2.91649	1.52517	0.0178409	2.67477	3.30119	3.56316	6.11644	3.98324	7.21152	486	-6.84645	-2.47371	-2.94389	-3.09511	-2.17398	-2.45442	-8.59527	-5.56956	-7.78776	-7.31174	-6.71949	-7.45886	-9.36045	-4.30376	-4.86329	-14.5208	-7.9462	-3.58059	-7.37429	-2.65695	-3.39915	-9.84091	-6.77801	-5.7694	-6.61461	-6.81137	-5.50815
487	-0.462201	1.58445	0.123262	5.58399	5.15374	1.97402	5.97569	3.5024	4.99904	487	-8.37271	-2.64334	-3.73745	-3.2523	-2.60129	-2.21056	-8.73572	-5.39996	-8.06389	-7.83183	-6.77924	-7.83801	-9.97629	-4.39553	-5.06223	-14.6407	-7.64839	-4.075	-7.30638	-3.08351	-3.90863	-9.54592	-6.70216	-5.90867	-6.77554	-6.87207	-5.69678
488	-2.02795	1.51968	0.761402	2.80422	3.25085	1.75446	5.66387	5.132	6.06717	488	-7.95497	-2.84129	-3.62363	-2.27061	-3.57508	-2.26487	-9.22398	-5.83419	-8.06831	-7.65936	-6.21815	-7.38347	-9.04904	-5.38853	-4.48027	-13.871	-7.28278	-3.47585	-6.7802	-3.79625	-3.81518	-10.1934	-6.64219	-5.95913	-6.86132	-6.99168	-5.69657
489	2.18367	0.110472	1.50429	4.02082	3.14403	1.87762	7.19304	4.13999	6.43031	489	-7.9706	-2.81775	-3.14659	-3.52176	-3.58445	-3.16362	-8.91014	-5.86403	-8.1984	-7.53386	-6.37532	-7.14186	-10.1589	-5.82055	-7.11576	-14.3176	-7.61574	-3.30497	-7.17758	-3.73525	-3.32726	-9.89738	-6.2946	-6.30222	-6.83283	-6.44267	-5.6623
490	0.994657	-0.771058	2.88442	3.48043	3.22406	1.59551	6.29446	5.88592	6.00632	490	-7.88072	-2.90962	-2.75966	-3.44581	-3.08228	-2.44572	-8.51242	-5.58013	-8.14017	-7.28985	-6.07634	-7.52593	-9.66768	-6.07114	-6.76239	-14.541	-7.99548	-3.60668	-7.3035	-3.74824	-3.48784	-9.94084	-7.21789	-5.99039	-6.32095	-6.73116	-5.33073
491	3.64364	0.134209	1.79	3.89028	4.27043	0.827462	5.24893	4.8649	5.15498	491	-7.92593	-2.50592	-2.81997	-2.93486	-2.92174	-2.78523	-8.79423	-6.31029	-8.54657	-7.52505	-6.4016	-7.2012	-10.4623	-5.71816	-7.13779	-14.485	-7.87544	-5.7462	-7.36193	-4.18385	-3.86074	-9.70843	-7.47912	-6.03653	-6.6376	-7.17065	-5.66252
492	-0.464276	0.771303	0.163938	4.42285	5.14836	4.04641	5.58363	3.77785	7.3532	492	-7.60758	-2.71481	-3.41975	-3.35323	-2.60006	-2.52179	-9.02873	-6.326	-8.34302	-8.94632	-6.37994	-7.35609	-9.94802	-5.92647	-6.56943	-14.6133	-7.5249	-5.56246	-7.47511	-4.3777	-3.30904	-10.3519	-7.37379	-6.46926	-8.21633	-7.79346	-5.35994
493	-0.628129	-1.12014	1.59184	2.64826	4.65878	4.93839	5.61914	5.71306	7.07484	493	-7.52009	-2.80741	-3.39846	-2.68385	-2.83006	-2.54643	-9.09878	-5.84053	-8.39713	-8.98869	-6.16819	-7.41036	-9.72196	-5.64545	-6.8335	-14.4545	-8.11667	-3.837	-7.45132	-4.56815	-3.59612	-10.3466	-7.20663	-5.85934	-8.38391	-7.65752	-5.81372
494	1.50416	-1.01138	2.30705	3.21884	4.76627	4.30827	5.73654	4.97719	7.24269	494	-7.87781	-3.17953	-3.33148	-3.34027	-2.98513	-3.85237	-9.47793	-6.04067	-8.80347	-8.12792	-6.32929	-6.89177	-9.91587	-5.4908	-6.73707	-14.6143	-7.33654	-5.58709	-8.7269	-3.94195	-3.63901	-9.83854	-7.10514	-6.65625	-8.79613	-7.82077	-5.37949
495	3.33511	-0.866687	1.98087	3.06935	3.1519	3.52076	6.61254	6.65331	6.87722	495	-7.40096	-3.53059	-3.5074	-2.68118	-3.01587	-3.7299	-9.50291	-6.25546	-8.44462	-8.45371	-6.70561	-7.30743	-9.9871	-6.20147	-7.18359	-14.5838	-8.06281	-5.84419	-8.55356	-4.02752	-4.12087	-9.98226	-6.82113	-5.99249	-8.31214	-8.03951	-5.8765
496	1.99687	-0.750484	2.32023	2.52481	4.28263	2.1219	8.38401	6.4841	7.33496	496	-8.75989	-2.44771	-3.39987	-2.88701	-2.73504	-3.26449	-9.07656	-6.56989	-8.63622	-9.02273	-8.28291	-7.52432	-9.71272	-6.18858	-6.83471	-14.4436	-8.07137	-5.96174	-8.71969	-4.48474	-3.49547	-10.1637	-7.02616	-5.97686	-8.62487	-8.14628	-5.63034
497	2.19137	2.45986	-0.775431	0.377214	5.20618	4.33104	6.20795	7.30293	4.73548	497	-8.13859	-2.70727	-3.65947	-4.16645	-3.37098	-2.92542	-9.4241	-6.44472	-8.60898	-8.74842	-8.20342	-7.28075	-10.1525	-5.86481	-6.04278	-14.4875	-7.43628	-5.74667	-8.23511	-4.51487	-3.52309	-10.2538	-6.76552	-6.4947	-8.25556	-7.63359	-5.20466
498	2.15291	-0.729909	0.737911	3.56509	3.50085	1.56718	8.10609	5.94826	6.36141	498	-8.00493	-3.43982	-2.93863	-3.66941	-3.6356	-3.50253	-9.44439	-6.49001	-8.70082	-8.77442	-8.63171	-7.23922	-10.183	-5.67189	-6.22431	-14.5031	-7.71711	-5.93892	-8.08107	-3.88723	-3.8126	-10.2378	-7.79514	-5.9982	-8.0375	-7.94524	-5.53926
499	0.909062	0.965228	-0.00326283	2.48312	1.99367	1.60176	6.40904	5.53541	6.76566	499	-8.17078	-3.15801	-3.10387	-3.78131	-3.46865	-3.86122	-9.96091	-6.67361	-8.68317	-8.91692	-6.43365	-7.14878	-10.9257	-5.84535	-6.48819	-14.9824	-7.62673	-5.72081	-7.96356	-4.20139	-3.80201	-10.0961	-7.7247	-6.40058	-8.61046	-7.66042	-5.31751
500	-0.731059	2.16698	2.75506	2.58122	3.52847	4.54451	7.87535	3.01444	6.02186	500	-8.39389	-3.26755	-3.44371	-2.97161	-2.85675	-3.21848	-9.01283	-5.84991	-8.72575	-9.34378	-7.32867	-7.54117	-9.77545	-6.28828	-6.8525	-15.0644	-8.09172	-3.86456	-8.79695	-3.45852	-4.25067	-10.368	-6.93925	-6.83013	-7.97999	-7.88291	-5.69361
501	1.97972	1.3469	2.43998	2.53423	4.29971	3.28807	7.04166	4.96861	5.37512	501	-8.30642	-3.54894	-3.03556	-2.99729	-2.66425	-3.46622	-8.95449	-5.99947	-8.98663	-8.88077	-7.20074	-7.71598	-9.46557	-5.17521	-7.16672	-15.1369	-6.97125	-4.23589	-6.83305	-3.99585	-4.22205	-10.2258	-6.60224	-6.46708	-8.25427	-8.1697	-5.76888
502	0.324283	2.29142	2.35996	3.04324	4.45589	3.86328	4.99689	4.98714	6.37698	502	-8.39594	-3.66738	-3.53131	-2.83292	-3.36981	-3.32983	-9.09046	-6.06306	-8.38795	-8.81273	-7.30421	-7.66773	-10.5104	-4.86963	-7.13658	-14.2466	-6.25899	-4.42999	-7.16052	-3.81642	-4.31068	-10.2451	-7.0855	-6.80071	-8.22134	-7.96412	-7.25424
503	2.59576	-0.113293	1.70226	4.69993	1.56034	3.32945	6.66242	3.61038	5.69954	503	-8.21985	-3.42566	-3.24028	-2.66453	-2.80354	-3.20555	-9.24831	-6.1363	-8.70749	-9.1851	-6.72278	-7.97475	-10.5317	-4.9571	-6.7444	-14.0531	-6.87954	-4.3648	-7.03079	-4.11888	-4.05699	-9.97991	-6.57887	-6.51352	-8.23429	-7.89782	-7.2015
504	1.85458	-1.46513	-0.859463	2.47124	4.52417	4.504	3.27911	4.6686	5.23705	504	-8.19635	-2.87629	-3.82814	-2.81487	-3.14121	-2.67993	-8.95648	-6.5763	-8.55327	-9.20626	-7.38124	-8.36423	-10.7171	-6.17145	-7.08938	-14.4255	-7.25609	-4.72106	-7.21249	-3.9326	-4.09353	-10.3871	-6.95762	-7.18043	-8.33105	-7.8057	-7.25317
505	2.66292	0.175157	0.60753	4.75275	2.70225	1.98198	6.08707	5.24868	4.71555	505	-7.88098	-3.47293	-3.51543	-2.99489	-2.78654	-3.97	-8.97787	-6.39878	-9.06536	-9.36379	-7.1686	-7.80662	-10.4572	-6.31949	-7.13504	-14.3862	-7.04089	-5.10679	-7.3742	-3.92302	-4.78085	-10.5165	-6.83436	-6.62225	-8.1931	-8.17255	-7.55484
506	1.63487	-0.20432	0.933274	2.93072	2.91629	2.73237	5.41576	2.64661	5.10427	506	-7.92374	-3.03611	-3.3635	-2.94977	-2.92754	-3.29099	-9.08329	-6.59908	-9.00908	-9.34383	-7.49495	-8.14258	-10.339	-6.33951	-7.13972	-14.0809	-7.02668	-5.13269	-7.35538	-3.9281	-4.30944	-10.4497	-6.92441	-6.88453	-8.06347	-7.75276	-7.53379
507	-0.0590944	-0.356904	-0.929027	2.70068	3.03173	1.47984	6.2758	4.34768	5.99737	507	-7.70812	-3.49441	-3.81433	-3.46627	-3.22254	-3.63417	-9.05205	-6.26173	-9.2457	-9.2823	-7.68579	-8.48471	-10.186	-4.91673	-6.62256	-14.6916	-7.05449	-5.14293	-7.03069	-4.20139	-3.99803	-10.5235	-7.07857	-6.71956	-7.83963	-7.55015	-7.35351
508	2.42394	1.77051	2.34409	1.85817	2.5514	-0.289334	5.13418	3.18027	3.75279	508	-7.747	-3.11245	-3.33965	-3.17339	-3.19389	-3.16164	-8.88268	-6.39722	-8.831	-9.54191	-7.14335	-8.08645	-10.2189	-5.07917	-6.94493	-14.5004	-6.9143	-5.37414	-6.76095	-4.00806	-4.7133	-10.2904	-6.88632	-5.68314	-8.64004	-8.09958	-7.28585
509	2.13755	1.73308	0.529965	3.02744	3.4191	3.43507	2.85072	6.54381	4.37404	509	-7.93117	-3.4285	-2.48186	-2.91797	-3.69697	-3.61353	-9.04452	-6.16004	-9.14298	-9.4755	-7.00355	-8.71464	-9.84472	-4.86677	-6.9821	-14.7044	-7.26538	-5.29152	-6.81092	-3.59789	-3.87176	-10.6344	-6.9634	-5.73596	-8.33725	-7.97206	-7.07628
510	0.543822	-0.690081	1.37766	3.17104	4.23021	2.35475	5.57029	4.5091	3.38507	510	-7.685	-3.27484	-2.31447	-3.21811	-3.19241	-3.34447	-8.60312	-6.56502	-9.11438	-8.13918	-7.39439	-8.47875	-9.66965	-5.34148	-6.98398	-14.8826	-6.99505	-5.69831	-7.18785	-3.5748	-3.87619	-10.6035	-6.84398	-5.4951	-7.98272	-8.25803	-7.30446
511	1.90612	2.8643	4.20888	3.5708	0.981237	1.28922	3.81741	2.39444	3.70809	511	-7.63393	-3.14654	-2.67605	-3.03927	-3.33482	-3.1713	-9.36251	-6.11276	-9.01628	-7.84365	-7.63268	-8.12477	-9.84502	-4.23655	-6.69643	-14.693	-7.07805	-5.37122	-7.07852	-3.16846	-3.87314	-10.7105	-6.92314	-5.22433	-8.47547	-8.27398	-7.5341
512	-0.847615	0.753748	2.13841	-1.93512	0.951268	3.48066	4.93606	2.48699	2.81047	512	-7.17701	-3.20945	-3.37908	-2.95446	-3.21607	-3.61986	-9.33163	-6.12288	-8.97049	-7.75675	-7.30126	-8.353	-9.77255	-4.5429	-6.44812	-14.8663	-7.1706	-5.54656	-7.51532	-3.67134	-3.98992	-10.1297	-6.8625	-5.44385	-8.36155	-8.2397	-7.40384
513	5.02951	1.71201	0.440831	-0.293484	2.02514	3.65951	3.63011	2.24544	2.76292	513	-7.59665	-3.34531	-3.62746	-4.01471	-3.14604	-3.62319	-9.39095	-6.48891	-9.04763	-9.09647	-7.56962	-7.98162	-9.10691	-4.23205	-6.82319	-15.1343	-7.01417	-5.33586	-6.92494	-3.7984	-3.58262	-10.5741	-6.89333	-5.34012	-8.74519	-8.20101	-7.51894
514	0.20575	2.364	3.59614	2.61598	2.10078	2.32093	2.53644	2.22852	2.88434	514	-8.32442	-3.04241	-3.24498	-3.80082	-3.39226	-3.65435	-9.01792	-6.52769	-9.23755	-8.9388	-7.23446	-8.0534	-9.23867	-5.42657	-6.64141	-14.8115	-6.75514	-5.3775	-7.21616	-3.44184	-3.56674	-10.3427	-6.56992	-5.13314	-8.60198	-7.98864	-7.61636
515	0.884288	1.18294	3.06049	0.44302	1.09328	2.95602	4.36984	2.87989	2.07129	515	-8.35537	-2.69241	-3.3706	-3.40564	-2.8025	-3.35911	-9.3973	-5.83772	-8.68043	-9.01613	-7.45793	-8.15186	-9.05244	-5.7629	-6.4634	-14.8792	-6.94151	-5.00385	-6.78364	-3.4955	-3.32588	-10.8647	-6.82512	-5.09877	-8.47075	-8.31843	-5.87461
516	0.0912212	0.460041	1.99788	0.169423	-0.595565	2.39502	3.86613	1.81388	0.873272	516	-8.49195	-3.25994	-3.32152	-3.69738	-2.92246	-3.17106	-9.24455	-6.27268	-8.58528	-8.90102	-6.84727	-6.14043	-8.75514	-5.37107	-6.56075	-14.8606	-6.72871	-3.42281	-7.429	-2.75522	-3.18134	-10.3394	-6.18297	-5.26667	-8.26344	-8.32285	-5.76519
517	-0.146904	1.48864	0.79526	0.575725	1.78388	1.71658	4.58154	3.57434	2.92385	517	-8.45559	-2.79908	-2.90478	-3.66439	-2.82729	-3.43858	-8.73143	-5.77109	-8.54995	-8.47684	-7.03471	-6.02221	-8.74594	-5.51911	-6.39576	-14.3411	-6.58362	-3.60884	-6.73399	-3.83855	-3.09566	-10.2144	-6.00471	-5.08896	-8.26787	-8.71132	-7.71979
518	0.625126	2.25724	0.591117	3.3198	0.969407	2.24251	2.97533	4.21713	2.85176	518	-8.32892	-3.07336	-2.94732	-3.56589	-3.42327	-3.36282	-9.67654	-6.30786	-8.60378	-8.14559	-6.51176	-5.6716	-9.9845	-5.04457	-6.62483	-14.5279	-6.34788	-3.45549	-7.29736	-2.68244	-2.63308	-10.7322	-6.10612	-4.763	-8.24405	-8.16777	-6.13803
519	1.85354	-0.769759	1.96274	-0.653056	4.95697	1.65518	3.34326	3.47308	2.24735	519	-7.60417	-2.68919	-3.16824	-3.3814	-2.69313	-3.18198	-9.02559	-5.90879	-8.54117	-8.40142	-6.16666	-6.1938	-9.29983	-5.09457	-6.14938	-14.2043	-5.92101	-3.24789	-7.01359	-3.06267	-2.90637	-10.146	-6.38677	-4.57225	-8.19615	-8.60985	-5.88483
520	-0.271624	-0.801698	1.35302	1.58273	1.81578	0.255404	3.62623	1.41037	2.07139	520	-7.69254	-3.46301	-3.23798	-3.02818	-1.75379	-3.36986	-9.40076	-5.6332	-8.04051	-8.32759	-6.25497	-5.78842	-9.26596	-5.08224	-6.37512	-14.3615	-6.49708	-3.57394	-6.31704	-2.56616	-3.53606	-10.155	-6.94793	-4.53588	-8.45166	-8.19808	-5.83527
521	1.12659	0.59004	0.917176	1.85351	0.435422	3.47286	2.72574	2.94072	2.46596	521	-7.72123	-3.07793	-3.44918	-2.49433	-2.417	-3.18371	-9.02304	-5.88724	-8.36098	-7.75454	-6.19885	-5.6079	-8.82938	-4.80029	-6.11192	-14.5099	-5.994	-3.77307	-6.80469	-2.20941	-3.98472	-10.016	-6.38204	-4.83735	-8.05023	-8.25918	-6.01988
522	0.0693645	-0.0412373	1.86493	-0.236398	0.0294465	4.0255	3.40584	1.28785	1.49667	522	-7.84819	-2.82732	-2.71122	-3.12883	-1.77411	-3.1993	-9.04108	-5.79839	-8.05004	-8.19549	-6.22893	-5.52463	-8.351	-5.19198	-5.95575	-14.0489	-5.78589	-3.47882	-6.69402	-2.42353	-3.20529	-10.1897	-6.75591	-4.42332	-8.07083	-7.53179	-6.05123
523	-2.97565	2.62258	-1.10296	-0.558755	-1.03158	1.77578	1.97619	2.51385	2.68956	523	-7.64391	-2.89746	-3.44977	-2.58354	-2.74201	-3.51227	-8.808	-5.31285	-8.07326	-7.76848	-6.06482	-5.37752	-8.42328	-4.32685	-5.8705	-14.6591	-5.9273	-2.9405	-6.33099	-2.85296	-3.81222	-10.3328	-6.48554	-4.45747	-7.8842	-7.90739	-5.87558
524	-0.165508	0.0329926	0.790439	1.35969	2.5934	0.115729	1.86257	3.26638	0.934073	524	-7.34217	-2.73211	-2.90293	-2.83279	-1.92857	-3.39863	-8.59297	-5.70476	-7.90803	-7.86252	-6.45816	-5.19654	-7.65326	-4.37116	-5.3155	-13.8646	-6.02073	-3.72518	-6.25615	-2.10122	-3.95882	-9.90496	-6.48416	-4.49444	-8.1179	-8.49303	-5.40824
525	2.66457	0.161116	1.71031	1.00186	-0.168164	2.0289	2.9212	3.52268	2.75297	525	-7.36228	-2.66577	-2.90458	-2.66031	-2.35287	-3.18657	-8.21572	-5.34712	-8.06064	-7.02014	-6.18541	-5.57926	-7.6476	-2.86608	-5.69987	-13.9562	-5.48727	-3.6251	-6.16593	-2.09207	-3.35269	-9.56173	-6.05763	-4.7784	-8.04031	-7.75313	-5.88473
526	2.68569	1.67449	1.67771	-0.926828	-0.818353	1.29665	3.55357	2.59556	2.59209	526	-7.40143	-3.02013	-3.03267	-2.28858	-3.21292	-3.67057	-9.00197	-4.92024	-7.86941	-7.23637	-6.16464	-4.88285	-7.35168	-2.15567	-5.55657	-13.8034	-5.63986	-3.32508	-6.14082	-2.44001	-3.59069	-9.69089	-5.92819	-4.54483	-7.95021	-7.87519	-5.83133
527	-1.25959	-0.876199	3.38183	0.714709	1.58224	2.33637	0.949958	1.70176	3.14449	527	-7.71033	-2.4635	-2.85422	-1.93302	-2.31222	-2.7259	-8.58597	-5.14632	-7.73273	-7.5352	-6.36188	-4.75775	-8.98095	-2.28004	-5.31801	-13.6861	-5.22029	-3.17307	-5.77714	-1.70274	-3.83751	-9.58299	-6.11637	-4.4329	-7.8035	-7.46694	-5.59966
528	1.71186	0.0885826	1.86969	1.73993	0.649558	2.2613	3.34195	3.56072	1.5854	528	-6.88009	-2.8134	-2.86765	-2.41673	-1.82378	-2.52998	-8.05821	-5.25631	-7.75898	-7.28717	-5.46252	-4.72635	-7.76152	-2.75157	-4.83995	-13.5035	-5.35593	-3.7248	-6.34995	-2.98563	-2.24525	-9.66115	-5.72793	-4.21334	-7.59366	-8.10095	-5.49763
529	2.59701	2.52649	2.75558	-0.300012	0.192497	1.20908	3.8084	2.00752	1.56028	529	-8.02949	-2.90994	-2.6526	-2.68873	-1.74283	-3.50969	-8.05833	-5.22811	-7.80599	-7.13175	-6.03642	-4.9619	-8.37745	-4.51799	-5.2033	-13.7409	-5.20993	-3.13689	-6.3856	-2.52989	-2.59563	-9.19486	-5.7295	-4.16499	-7.45138	-8.239	-5.4069
530	-0.027854	-0.92798	1.82068	0.377184	-2.58833	-0.208142	1.74925	2.83928	2.088	530	-8.31946	-2.98596	-2.65797	-2.35374	-1.68801	-2.92483	-7.95102	-5.43448	-7.39658	-6.50781	-5.66552	-4.6168	-7.8448	-2.50522	-4.84068	-13.5659	-5.26471	-3.27855	-5.70054	-2.10482	-3.11551	-9.33587	-6.04686	-4.34168	-7.69539	-7.62365	-5.07186
531	0.83684	-0.786534	-0.357151	1.5884	0.467476	1.89121	4.0865	2.86771	1.61385	531	-8.1292	-2.86346	-2.98097	-2.19193	-1.70336	-2.86605	-8.10353	-5.35692	-7.79584	-6.92873	-5.92114	-5.06623	-7.5569	-4.10231	-4.80485	-14.1267	-5.07323	-3.44953	-5.93491	-2.3426	-3.60171	-8.81014	-5.59979	-4.19655	-7.39342	-7.82934	-5.19093
532	0.0333012	-1.31706	0.377526	1.35207	0.909786	-0.20729	2.54718	2.2376	1.87279	532	-7.723	-2.70358	-2.74117	-2.32942	-1.7711	-2.51637	-8.17442	-5.44282	-7.26049	-6.62756	-5.4004	-4.59388	-7.81535	-1.70039	-5.24805	-13.4921	-4.94307	-2.85281	-6.04237	-1.96118	-2.86735	-8.87698	-5.5264	-4.24967	-7.67405	-7.7909	-5.37362
533	1.26557	-0.378908	0.652475	-0.553898	1.46422	2.19156	4.7126	2.67011	1.58511	533	-7.28337	-2.73978	-2.77957	-1.68389	-2.54699	-2.6704	-7.86777	-4.87223	-7.35452	-6.33878	-5.92557	-4.32844	-7.69569	-3.01868	-4.85938	-13.4926	-4.69332	-2.89979	-5.84701	-2.10017	-3.26544	-8.14288	-5.10576	-4.10548	-7.53976	-7.85609	-5.0743
534	1.30439	0.284905	-1.79326	-1.05469	0.0439619	0.892504	2.79047	3.4608	1.69621	534	-7.08365	-2.30799	-2.36256	-2.20206	-2.58501	-2.51304	-7.72271	-4.64217	-7.10869	-6.35444	-5.86817	-4.30893	-6.67174	-1.86722	-4.17135	-13.4495	-4.83195	-3.40186	-5.72439	-1.8172	-3.36834	-8.08818	-5.27151	-4.3584	-7.09682	-7.50786	-5.40687
535	0.745836	-1.12365	0.104255	-0.725569	0.916839	1.22347	1.79329	2.15553	0.877516	535	-7.3844	-2.34849	-2.49189	-1.92899	-2.30995	-2.40834	-8.08979	-4.84211	-7.2615	-6.3634	-5.47434	-4.60381	-6.70458	-2.07087	-4.14103	-13.5702	-4.78758	-3.18354	-6.12539	-2.34529	-3.42964	-8.80273	-5.20814	-3.75772	-7.22443	-7.53454	-5.44528
536	0.0809265	3.61572	0.56004	0.266356	1.04584	4.07934	3.43116	0.900277	1.56183	536	-7.55115	-2.64858	-2.60055	-1.49568	-2.25191	-2.96315	-7.95266	-5.19178	-6.38662	-6.42947	-5.5561	-4.4898	-6.93546	-2.12968	-4.2458	-13.1736	-5.21286	-3.03846	-5.99222	-1.92821	-3.37263	-8.22107	-5.02056	-4.07786	-7.39052	-7.5959	-4.93582
537	-0.0584033	-0.162803	0.184293	-1.16319	3.16214	-1.16325	0.237147	0.494955	1.34643	537	-7.15758	-2.98734	-2.78413	-1.588	-2.15735	-2.92127	-7.88668	-4.72617	-7.13036	-6.49526	-5.28281	-4.51303	-7.01161	-1.63433	-3.84836	-13.4018	-4.68874	-3.16039	-5.85254	-1.519	-3.35884	-9.01891	-4.88631	-4.03905	-6.62409	-7.58614	-5.20696
538	3.12991	0.125926	1.51643	-2.57604	-0.345233	2.11731	1.61945	1.45892	1.87193	538	-6.81812	-2.37971	-2.48251	-1.77671	-2.38589	-2.22394	-7.66722	-5.08271	-7.13455	-6.361	-5.48797	-4.01826	-6.2116	-1.53462	-4.07198	-13.2906	-4.69956	-3.14225	-6.98537	-1.11472	-2.84326	-7.9558	-4.93491	-4.00719	-6.58004	-7.69674	-4.65844
539	-0.955855	-0.176576	0.620288	-1.78645	2.25993	1.87631	1.83869	1.74375	1.17662	539	-6.96501	-2.44098	-3.07295	-1.41442	-1.80546	-2.58682	-7.56352	-4.90911	-7.18563	-5.787	-5.58376	-4.48107	-7.80636	-1.47782	-3.93264	-13.3873	-4.63471	-2.93284	-7.22745	-1.88184	-3.05082	-7.70094	-4.78228	-4.04792	-6.88992	-7.2548	-4.85446
540	1.6196	0.265911	1.90039	0.418069	-1.72136	1.24335	2.91593	0.607287	1.47586	540	-6.94188	-3.14753	-2.01204	-1.3931	-1.55531	-2.37294	-7.68782	-4.96379	-7.0547	-6.16378	-5.26898	-4.46447	-7.14568	-1.61694	-3.92276	-12.9344	-4.28364	-3.21971	-6.6711	-1.83522	-3.01161	-7.82001	-4.83413	-4.05731	-6.84279	-7.36996	-5.04444
541	-0.663292	-0.181981	-1.51536	-0.146419	-1.14881	2.01834	3.26302	0.759958	2.11227	541	-7.09967	-2.76594	-2.84125	-1.2669	-1.58798	-3.01909	-7.35459	-4.8189	-7.03227	-5.87184	-5.5841	-3.60129	-7.47125	-1.09401	-3.62315	-13.0948	-4.05223	-3.58335	-7.01033	-1.28759	-2.591	-7.67061	-4.53722	-3.61112	-6.52696	-7.07011	-4.99518
542	0.247007	-0.63912	1.54457	1.90966	-0.11886	0.636594	1.37226	1.83289	0.362201	542	-6.70251	-2.57545	-2.83264	-1.30938	-2.04454	-2.24268	-7.06377	-5.10354	-6.90604	-5.39087	-4.78826	-4.27457	-7.20026	-1.34076	-4.31807	-12.7393	-4.11554	-2.80708	-6.57628	-1.73173	-2.27239	-8.15464	-4.77557	-3.54113	-6.94225	-7.44735	-4.85014
543	1.85257	2.07198	2.09225	-0.590124	1.08507	3.84101	1.89219	1.96085	1.49279	543	-6.84852	-2.63412	-3.01397	-1.43265	-1.51633	-2.65141	-6.90567	-4.65024	-7.18851	-5.32485	-5.38081	-4.23981	-6.9033	-1.94877	-3.32532	-13.1412	-4.42856	-2.6473	-6.63229	-1.57908	-2.94082	-7.88273	-4.78623	-3.66556	-6.9749	-7.17681	-4.8448
544	2.21356	-4.35431	1.78625	-0.319316	-0.554942	-0.198217	1.70063	1.63974	1.90584	544	-6.7211	-2.57623	-2.20596	-1.9337	-1.61362	-2.58571	-7.55275	-4.44498	-6.79095	-5.10603	-5.0521	-4.36335	-6.86874	-0.91821	-3.81109	-13.1768	-4.27735	-0.69954	-6.87302	-1.55944	-3.22604	-7.83827	-4.908	-3.6573	-6.64287	-7.01951	-4.79975
545	-1.24882	1.71985	0.628431	-2.09264	0.518656	3.31926	1.00867	2.62028	1.50886	545	-6.15622	-2.33918	-2.65646	-1.1565	-1.8666	-1.84835	-6.923	-4.63999	-6.82417	-5.20313	-5.39637	-3.8258	-6.95866	-1.42147	-3.65285	-12.6059	-4.23492	-1.19929	-7.19008	-1.55374	-2.76889	-7.64835	-4.65496	-4.00685	-6.55608	-7.47313	-5.05742
546	0.0633783	-0.195265	2.61994	-2.06759	-1.66425	0.737408	2.13245	2.93073	0.937063	546	-6.88893	-2.53237	-2.54037	-1.58126	-1.5487	-1.88918	-7.20394	-4.87581	-6.87458	-5.43004	-4.7163	-3.9379	-6.42173	-0.802547	-3.27243	-12.9219	-4.01302	-0.827326	-6.77736	-1.32227	-2.27749	-7.85622	-4.37126	-3.56709	-6.69714	-6.80685	-4.92913
547	-1.06292	-0.185594	-1.62313	0.81347	0.960763	0.519019	1.70886	2.93882	0.0507425	547	-6.12579	-2.0597	-2.57814	-1.1291	-1.14032	-1.74048	-7.30839	-4.57513	-6.91542	-5.36191	-5.11166	-3.94839	-6.07817	-0.800527	-3.78568	-12.8072	-4.14345	-0.940824	-6.76198	-1.11582	-2.65488	-7.30253	-4.39951	-3.27119	-6.92277	-7.62298	-5.01066
548	-1.36915	-0.319547	1.97734	-1.57016	-2.20931	1.51087	-0.0612057	1.70238	0.939974	548	-6.84827	-1.98328	-1.91166	-0.915861	-1.43768	-2.28532	-7.06724	-4.48928	-6.90332	-4.97756	-5.35403	-3.74128	-6.29199	-0.923147	-3.34852	-12.8576	-4.25465	-0.95851	-6.57335	-1.38988	-1.21427	-7.82614	-4.51863	-3.64265	-6.4901	-7.35701	-5.38375
549	1.86355	0.0575941	1.27462	0.167984	0.209611	0.0455597	-2.25191	1.99901	2.20644	549	-6.25082	-2.16159	-2.61333	-1.10691	-1.47131	-1.98063	-6.95283	-4.51129	-6.95189	-5.27495	-4.7796	-3.4651	-6.98565	-0.991545	-3.46119	-12.8105	-3.88482	-1.49859	-6.33308	-1.19809	-1.43342	-7.90599	-4.67073	-3.4383	-6.2523	-7.37638	-5.07719
550	-2.31608	-0.270647	-1.14398	-2.47944	-0.328232	2.64596	2.32429	3.97036	1.89497	550	-7.19029	-2.1239	-2.44476	-1.30672	-1.43777	-2.10254	-7.11135	-4.2402	-6.50206	-4.90387	-5.0677	-3.87596	-6.55669	-1.0029	-2.75532	-13.2218	-3.70417	-0.579489	-6.16611	-1.07361	-2.36341	-7.29698	-4.42105	-3.44743	-6.65788	-6.85404	-5.07396
551	0.658347	2.32702	0.568025	-2.51374	-1.55004	1.89374	1.76138	0.520843	0.882173	551	-7.28745	-1.66399	-1.98245	-1.37125	-1.3157	-2.2676	-7.00515	-4.42021	-6.48431	-4.86451	-5.21596	-4.13603	-6.73511	-0.659862	-2.72842	-13.2278	-3.96721	-0.914901	-6.465	-0.665355	-2.15952	-7.82985	-4.18945	-3.38461	-6.27362	-7.49157	-4.70142
552	1.63048	-0.498929	-1.31881	0.629236	0.524095	1.69792	-0.632319	-1.29334	0.8328	552	-7.27564	-2.28485	-1.92331	-1.43206	-1.21275	-2.47958	-6.85113	-4.79639	-6.48452	-4.92149	-4.5325	-3.50097	-6.44686	-1.16706	-3.17586	-12.8909	-3.8728	-0.840801	-6.36325	-1.14572	-2.06779	-7.77596	-4.1824	-3.38044	-6.46433	-5.60368	-4.67309
553	-2.10415	1.86833	-0.719877	-0.450351	-0.688173	1.14952	2.47521	3.14041	1.91322	553	-6.65036	-2.2172	-1.51087	-1.18012	-1.69002	-1.4698	-7.06715	-4.49134	-6.61429	-4.96794	-4.36219	-4.00632	-6.21883	-0.915558	-3.38959	-12.9695	-4.19061	-0.892995	-5.82516	-1.15703	-2.06163	-7.65095	-4.40391	-3.352	-6.20192	-7.20779	-4.56305
554	0.0738182	0.92002	0.699259	1.20595	-0.0225111	0.571306	1.89781	1.14218	2.14439	554	-6.89123	-2.24108	-1.78533	-1.12042	-1.12026	-1.87754	-7.10874	-4.60088	-6.23486	-4.89334	-4.78403	-3.16927	-6.12542	-0.926555	-2.91371	-12.2728	-3.90138	-1.0604	-6.86173	-1.49682	-1.97419	-7.48041	-3.99098	-3.23944	-6.29551	-5.58565	-4.79785
555	0.668332	1.38027	-0.987732	-1.70023	-0.995253	1.23917	0.0825298	1.48968	2.67567	555	-6.72681	-1.79383	-1.63604	-1.05797	-0.532218	-0.884891	-6.92695	-4.70845	-6.84358	-4.67409	-5.27021	-3.96163	-5.71716	-0.717894	-2.77201	-12.5519	-3.32354	-0.861893	-6.08091	-1.30316	-2.43034	-7.08556	-3.92799	-3.60943	-6.06352	-7.18739	-4.49443
556	-0.226344	0.857828	1.29482	-1.38079	2.06008	2.46037	1.20665	1.51151	0.595617	556	-6.94046	-1.99731	-1.16062	-1.021	-1.15592	-1.06234	-6.82201	-4.91778	-6.37943	-4.59642	-4.69843	-3.90741	-5.79051	-0.405092	-2.62259	-12.6765	-3.82766	-0.65146	-5.89544	-1.47085	-1.72351	-7.33939	-3.9672	-3.21723	-5.83143	-6.89359	-4.3802
557	0.315761	-0.643985	0.484923	-1.47862	1.43651	-0.471347	0.821081	0.212046	1.35296	557	-6.62242	-2.19747	-1.52533	-1.00351	-1.35204	-1.46035	-7.16167	-4.59565	-6.58558	-4.72542	-4.96871	-3.52886	-5.69469	-0.576093	-2.93613	-12.8069	-3.63349	-1.14075	-6.45147	-1.1048	-1.85651	-7.44903	-3.93708	-3.20078	-6.02227	-6.92857	-4.86445
558	2.72262	2.36655	0.0126252	-1.73214	-0.270922	-0.762305	-0.359569	3.49821	2.33338	558	-6.9885	-1.8013	-1.73205	-2.14705	-1.48596	-2.54738	-6.72524	-4.40224	-6.13199	-4.32728	-4.89065	-3.82991	-6.63825	-0.62153	-2.82794	-12.2904	-3.9719	-1.26975	-6.4458	-1.17595	-1.87544	-7.44345	-3.77849	-3.14375	-5.94153	-6.82614	-4.55442
559	-0.790737	0.948027	1.90269	-1.05933	-1.49903	0.381942	0.988874	2.85578	0.606935	559	-6.84411	-2.15921	-2.12125	-1.85683	-0.778008	-2.26005	-6.51737	-4.19692	-6.49069	-4.43233	-4.82252	-3.25664	-6.25162	-1.65784	-2.933	-12.5993	-3.46677	-1.23223	-6.38193	-0.762712	-1.12005	-7.77615	-3.26031	-3.47681	-6.36914	-6.54618	-5.18493
560	-2.47743	-1.48899	2.44672	-2.69265	-2.7139	-0.579927	2.54746	2.63256	0.492123	560	-6.68056	-2.33784	-2.46683	-1.85133	-1.16396	-2.27445	-6.80799	-3.9965	-6.12426	-4.51081	-4.95498	-3.54571	-6.70595	-2.03466	-2.61786	-12.7023	-3.75533	-1.2165	-6.12446	-0.731953	-0.829823	-7.43455	-3.50723	-2.74877	-6.24418	-5.36401	-4.87816
561	1.09024	0.874272	0.50203	-1.25312	0.41744	-0.52101	1.18212	3.05228	0.336116	561	-6.5876	-2.18996	-1.88869	-1.02181	-0.515868	-2.68104	-6.69813	-4.40733	-6.33391	-4.52719	-4.67923	-3.70431	-5.98186	-2.05719	-2.15529	-12.2256	-3.35488	-0.930515	-6.2575	-1.01439	-2.11878	-7.19016	-3.75535	-3.09569	-6.25483	-5.38475	-4.61974
562	-1.44801	-0.541089	1.35907	-0.953259	0.318936	0.317546	0.41187	3.5761	1.62379	562	-6.40224	-1.66295	-1.69076	-1.77086	-0.880631	-1.55845	-6.70468	-4.56728	-6.14519	-4.9281	-4.86357	-3.53553	-6.06244	-0.32855	-2.72456	-12.0797	-4.07025	-1.19205	-6.1062	-1.22089	-2.21858	-7.22662	-3.58979	-3.30628	-6.28168	-5.57344	-4.57428
563	-1.93717	-0.197616	-1.32306	-1.42224	0.198629	-0.87423	1.74627	1.10934	1.76271	563	-6.53763	-1.78323	-1.53211	-1.37694	-0.770807	-2.16666	-7.28744	-4.19126	-5.68723	-4.53518	-4.62248	-3.31473	-5.72025	-0.131983	-2.28065	-12.59	-3.26279	-0.948075	-6.17908	-1.01861	-2.57626	-7.5622	-3.8732	-3.198	-6.33259	-5.922	-4.92262
564	-1.25433	-2.03306	3.94096	-1.43986	-0.298276	-0.864019	1.13068	0.817207	0.709063	564	-6.55392	-1.65681	-2.40471	-1.62012	-0.552013	-1.71367	-6.59249	-4.516	-6.14505	-4.34591	-4.35544	-4.04725	-5.51489	-0.714063	-2.44241	-12.4492	-3.07266	-1.39271	-6.03866	-1.2413	-1.87001	-7.25448	-4.28117	-3.11726	-5.55266	-5.29675	-4.33104
565	-1.36581	1.65077	0.482394	-3.8307	-0.434816	-1.76077	0.583003	1.16921	0.709806	565	-5.71287	-1.71571	-1.75193	-1.11638	-0.873368	-1.8546	-6.91579	-4.398	-6.20145	-5.03349	-4.86382	-3.31839	-5.44208	-0.485875	-2.61348	-12.7232	-3.50229	-1.33047	-6.08574	-0.731713	-2.15585	-7.22323	-4.6569	-3.15475	-5.6379	-5.10624	-4.37898
566	-0.201327	0.638467	-1.40708	-1.53714	0.174724	-1.33869	-0.491579	0.56171	-0.14157	566	-6.23276	-2.03626	-2.05161	-1.48367	-0.863288	-2.10958	-6.53977	-4.33553	-5.82992	-4.72135	-4.9981	-3.42854	-5.39488	-0.495591	-2.55875	-10.9048	-3.43261	-1.22954	-6.19456	-0.334237	-2.0166	-7.49532	-4.67472	-2.9985	-5.62373	-5.72967	-4.09363
567	0.105753	0.828044	1.91664	-3.60049	1.60636	0.499897	1.27839	1.94688	0.421228	567	-6.22364	-1.42666	-1.46217	-1.0715	-0.412027	-1.17214	-6.25745	-4.33437	-6.28725	-4.80974	-4.2919	-3.49359	-5.46406	-0.0996103	-3.02287	-12.521	-3.78039	-1.37881	-6.29134	-0.927481	-2.36889	-7.40321	-4.31714	-3.11779	-5.87828	-5.61014	-4.90005
568	-1.41363	2.33678	0.629964	0.638585	0.843276	2.01152	1.46951	1.88534	0.471267	568	-6.42225	-1.6736	-1.749	-1.15187	-0.450018	-1.68953	-6.91963	-4.32745	-5.82789	-4.77512	-4.412	-3.38776	-6.52026	0.169373	-2.99524	-12.2299	-3.73317	-1.56966	-5.72917	-1.02651	-1.07264	-6.92184	-4.21069	-2.71154	-5.55618	-5.38527	-4.61012
569	2.03276	0.287394	2.53134	-2.73538	-1.50375	-0.80176	0.941722	1.09455	-1.36342	569	-6.07968	-1.74394	-2.18525	-1.12932	-0.80173	-1.26439	-6.57908	-4.42596	-6.28207	-5.07385	-4.37838	-2.71412	-6.60448	0.300441	-2.40692	-12.3758	-3.48765	-1.19483	-6.03945	-0.567136	-1.57963	-7.22225	-4.43268	-2.91551	-5.86278	-5.32528	-4.37028
570	0.872937	0.415996	0.563798	-1.38595	-0.152708	-0.444262	1.18886	1.01055	0.704474	570	-5.8024	-1.70323	-1.65911	-1.43392	-1.12448	-2.17797	-6.70545	-3.63239	-5.84206	-4.56779	-4.57198	-3.05671	-6.32935	0.246701	-2.59781	-12.4133	-2.97673	-1.08448	-6.09341	-0.803054	-0.94145	-7.03594	-4.63063	-2.87861	-5.75824	-4.76866	-4.57239
571	-1.72411	0.120696	0.691153	-2.5019	0.00296847	-0.137942	0.410078	0.582415	-0.582483	571	-7.03148	-1.83659	-2.0176	-1.43721	-0.31884	-1.35758	-6.77661	-4.18919	-5.64226	-4.65436	-4.76685	-2.8331	-6.67641	0.155958	-2.4304	-10.8166	-3.03263	-1.37431	-6.01146	-0.365859	-1.02398	-7.18267	-4.51587	-2.89928	-5.58886	-5.19005	-4.3975
572	1.37498	0.246211	-0.775352	-3.34145	0.327178	2.66318	-0.98087	2.4827	0.160311	572	-6.57862	-1.84018	-1.32516	-1.17727	-0.599712	-2.23169	-6.44454	-4.37856	-5.90681	-4.7608	-4.53526	-2.94541	-5.9943	0.813162	-2.59241	-11.0717	-3.60903	-1.07135	-5.73303	-0.673117	-0.785793	-7.39496	-4.51989	-3.25259	-5.41488	-5.11852	-3.96649
573	1.62788	0.119036	-0.55323	-0.161627	0.927728	-0.174535	1.25692	2.85935	0.434026	573	-6.50826	-2.20404	-1.59464	-0.72576	-1.06758	-1.98624	-6.57798	-4.12422	-5.67676	-4.632	-4.32192	-3.52299	-5.83879	0.155232	-2.83965	-10.7721	-3.31332	-1.26176	-5.91417	-0.920581	-1.61379	-7.95742	-4.07987	-3.117	-5.28278	-5.02057	-4.64497
574	-0.373712	-1.05222	1.72775	-1.0143	-3.06764	-1.86767	1.42069	0.617523	-0.803776	574	-6.17227	-2.46397	-1.65582	-1.50845	-0.603483	-2.09103	-6.67295	-4.14068	-5.6736	-4.94433	-4.37676	-3.18306	-6.11131	-0.0808055	-2.89182	-10.9693	-3.88325	-1.76937	-5.45888	-0.777134	-1.6862	-6.75837	-3.95013	-2.85475	-5.46791	-4.87955	-4.56858
575	0.0386803	-0.420122	0.167849	-0.48613	-1.01353	1.81409	-1.39903	0.206165	1.07346	575	-6.6537	-1.80182	-2.02702	-0.884147	-1.03758	-1.92573	-6.97613	-4.1985	-6.15517	-4.53303	-4.29997	-3.04051	-6.05261	-0.379368	-3.04134	-10.7273	-3.34773	0.677288	-5.7401	-0.525022	-1.82149	-7.15577	-4.34263	-2.7479	-5.60165	-5.36279	-4.79112
576	-0.439771	-1.86822	0.760614	-1.70668	0.886875	0.485486	-0.289906	1.8281	1.18373	576	-6.08052	-1.9002	-2.88735	-1.03692	-1.23592	-2.06599	-6.72813	-3.93143	-5.5843	-4.55845	-4.23416	-3.02777	-5.44881	-0.23723	-2.36999	-10.8049	-3.62649	0.176598	-5.62082	-0.78111	-0.504244	-6.90922	-3.85203	-2.27211	-5.33514	-5.24306	-4.67204
577	0.290167	-0.999552	0.0210314	-3.45114	0.619091	0.567714	0.0252499	1.80193	-0.698855	577	-6.16128	-1.78772	-2.56888	-0.997273	-1.64945	-0.959488	-6.8793	-4.23037	-5.55662	-4.49199	-3.83584	-3.41168	-5.21017	0.494235	-2.59033	-11.0458	-2.93711	0.402424	-6.08951	-0.243301	-0.392474	-7.06423	-3.98442	-2.74268	-5.23533	-5.14041	-4.87805
578	2.00692	-1.20949	2.24584	-2.40352	1.31558	2.67972	2.44156	0.458234	-0.446194	578	-6.26282	-1.67087	-2.51703	-0.285031	-1.01111	-1.40275	-7.07005	-4.31039	-5.65367	-4.82875	-3.9209	-3.37261	-5.31469	0.579178	-2.42129	-11.0078	-1.13311	-0.244211	-5.28768	0.0255801	-0.388276	-6.82334	-3.76288	-2.43565	-5.88865	-4.97865	-4.77127
579	-1.51465	-1.2423	-0.00836663	-0.84448	-0.388543	0.0954293	1.1271	0.302656	-0.426433	579	-6.32641	-1.58564	-2.33241	-1.2178	-0.545588	-1.1375	-6.82722	-4.38359	-5.90758	-4.61697	-4.12208	-3.07637	-5.60634	0.0458895	-2.59183	-11.1476	-1.05711	-0.401415	-5.65183	-0.776367	-0.19665	-7.07118	-3.56288	-2.74775	-5.76271	-5.12364	-4.73585
580	-1.0962	1.31824	1.15334	-1.45387	0.0014535	-1.66425	0.798468	2.26719	0.798265	580	-6.06554	-1.37513	-2.304	-1.12826	-0.306416	-1.90144	-6.68486	-3.90975	-5.592	-4.69841	-4.09451	-3.08996	-5.56735	0.519105	-2.32804	-10.9518	-1.78703	-0.200361	-5.37781	-0.356325	-0.0634605	-6.62022	-4.05139	-2.60341	-5.52731	-5.14085	-4.70104
581	-1.58444	1.04342	-0.412988	-2.36395	1.2144	1.14327	-0.267312	0.671715	0.0537083	581	-6.08289	-1.65183	-2.43682	-0.707384	-0.583898	-1.38562	-6.43579	-3.97573	-5.51442	-4.62104	-3.92567	-3.35009	-5.8174	0.0175909	-2.20726	-10.8751	-1.39396	-0.312775	-5.19076	-0.812684	-1.69579	-6.59471	-3.70775	-2.29026	-5.30092	-4.45375	-4.37113
582	-2.18392	1.80317	0.285141	-2.23583	1.18497	2.16235	-1.34863	1.43039	-0.383225	582	-5.77393	-1.42581	-2.661	-0.870248	-0.636307	-1.495	-6.52355	-4.10145	-4.97165	-4.80662	-3.98243	-2.96276	-6.37109	0.176334	-2.15939	-10.974	-1.73147	-0.610929	-5.53148	-0.96672	-1.65081	-6.44532	-3.55792	-2.72108	-5.00784	-4.84976	-4.76834
583	-0.798992	0.107389	1.4424	-3.83462	0.845143	-0.642896	-1.86848	1.70275	-0.384126	583	-6.38615	-1.07506	-2.51167	-0.795703	-0.549258	-1.51834	-6.99985	-4.38369	-5.22209	-4.93059	-3.67853	-3.61598	-6.83142	0.103017	-1.83697	-10.7603	-1.65725	-1.19201	-4.988	-0.77378	-1.34565	-6.85488	-3.9896	-2.47101	-4.99042	-4.69049	-4.77285
584	0.358044	0.237114	2.53658	-3.67151	0.784061	0.956126	-0.46432	0.697743	0.00911167	584	-5.83793	-1.43231	-2.41652	-0.855504	-0.786753	-0.658629	-7.14684	-3.50171	-5.22309	-4.90062	-3.82098	-3.12302	-6.50762	-0.261249	-1.70756	-10.9224	-1.87553	-0.897284	-5.01803	-0.868693	-0.623075	-6.49152	-3.84495	-1.22134	-4.81932	-5.24013	-4.55417
585	-0.904756	-0.203082	1.07646	0.759724	-0.588273	1.92622	0.482151	0.316195	-0.530028	585	-5.81509	-1.56575	-2.75156	-0.426159	-0.900512	-1.71433	-7.01319	-3.97312	-5.45755	-4.76343	-3.95275	-3.19771	-6.19366	-0.102249	-2.01416	-11.0355	-1.47281	-0.955422	-5.24245	-1.3275	-0.823431	-6.97954	-3.81245	-1.36403	-5.61723	-4.73998	-4.6551
586	-0.207358	-0.9732	-0.0824919	0.766339	0.441366	0.953335	-1.26279	0.97213	0.788393	586	-6.14357	-1.6493	-2.6723	-0.522909	-0.957321	-0.993228	-6.77961	-3.86129	-5.44601	-4.61112	-3.88792	-2.88231	-6.49656	0.332733	-1.41528	-10.987	-1.89517	-0.993067	-5.11011	-0.918569	-0.681798	-7.28267	-3.84443	-1.17862	-4.91187	-4.89517	-4.41516
587	-0.97353	-0.0107886	0.249212	-0.0103125	0.305665	-1.57788	-0.341429	0.913011	0.171803	587	-6.31055	-1.68758	-2.65544	-0.263139	-0.438099	-1.7374	-6.9006	-3.48306	-5.34873	-5.00145	-4.05946	-2.41984	-6.68811	0.463853	-2.02559	-11.3302	-1.92352	-1.34959	-5.14488	-0.890876	-0.214539	-6.64569	-3.60052	-1.3383	-5.11302	-4.39806	-4.40564
[truncated: 63 more rows]

## Sheet: Fig 5C,D
Source Data	Figure 5A	AWC cyto-pH data: individual dF/F(%) traces
[truncated: 906 more rows]

[truncated: 1 more sheets: Supporting Stats]
