# Supplementary material for: Diverse modes of synaptic signaling, regulation, and plasticity distinguish two classes of C. elegans glutamatergic neurons
Source: eLife. 2017 Nov 21;6:e31234. doi: 10.7554/eLife.31234 (PMC5705214; doi:10.7554/eLife.31234)
Supplement: Figure 6—source data 1. [file elife-31234-fig6-data1.xlsx]

## Sheet: Fig 6C,D
Source Data	Figure 6C,D	AWCON and ASH decays from single-term exponential fits
	AWC tau (secs)	ASH tau (secs)		Descriptive Statistics	AWC	ASH		Unpaired t test	AWC vs. ASH
				Number of values	218	168		P value	<0.0001
	15.6475	12.2016						P value summary	****
	18.7369	6.60036		Minimum	1.412	1.169		Significantly different (P < 0.05)?	Yes
	16.2188	4.64967		25% Percentile	14.77	4.668		One- or two-tailed P value?	Two-tailed
	8.98828	10.5013		Median	18.44	7.004		t, df	t=17.1 df=384
	19.0588	13.0372		75% Percentile	22.18	10.45
	11.3026	2.1896		Maximum	46.87	28.98		How big is the difference?
	21.3498	6.72986						Mean ± SEM of column A	18.59 ± 0.4405, n=218
	26.4903	9.26583		Mean	18.59	8.28		Mean ± SEM of column B	8.28 ± 0.3813, n=168
	27.2252	3.95809		Std. Deviation	6.504	4.943		Difference between means	-10.31 ± 0.6032
	21.8299	5.68765		Std. Error of Mean	0.4405	0.3813		95% confidence interval	-11.5 to -9.127
	18.903	28.979						R squared (eta squared)	0.4322
	15.8531	11.7382		Lower 95% CI	17.73	7.528
	22.5524	9.88946		Upper 95% CI	19.46	9.033		F test to compare variances
	17.2447	15.4168						F, DFn, Dfd	1.731, 217, 167
	11.7453	3.74017						P value	0.0002
	10.2753	13.8802						P value summary	***
	21.8032	8.10852						Significantly different (P < 0.05)?	Yes
	17.6723	11.7009
	13.5028	14.701
	40.6339	9.60795						Kolmogorov-Smirnov test	AWC vs. ASH
	17.6147	4.33689						P value	<0.0001
	21.6795	18.3832						Exact or approximate P value?	Approximate
	14.0104	16.0333						P value summary	****
	14.0476	9.24034						Significantly different (P < 0.05)?	Yes
	17.4957	5.73732						Kolmogorov-Smirnov D	0.682
	10.0765	18.7524
	20.3972	21.7869
	14.8078	2.53852
	12.5428	3.48703
	16.7042	4.52196
	11.7504	5.12618
	19.0515	10.0092
	12.0019	6.26749
	16.7175	4.54365
	14.8101	1.87858
	30.177	5.21695
	16.3722	6.44904
	18.3956	4.66005
	15.5426	18.7023
	28.1404	7.13925
	13.1576	8.70402
	21.5238	6.7813
	25.2873	5.37464
	10.413	8.43346
	15.3135	15.7538
	18.8136	6.30562
	10.195	4.07174
	21.0246	9.1313
	4.49715	11.2833
	28.1423	7.00822
	46.8688	6.9998
	17.2392	6.96865
	16.1906	11.8472
	32.407	3.71932
	14.7764	3.46683
	15.591	3.10383
	6.09346	9.64025
	13.8498	9.95942
	14.3507	3.09046
	23.4925	12.3833
	16.5898	15.1938
	8.63868	4.71713
	27.2358	9.46523
	14.6795	10.0045
	15.8482	5.42233
	19.3089	6.39184
	24.7368	10.2473
	22.9747	10.3149
	19.9824	14.419
	18.4598	8.27471
	22.5145	17.4327
	15.7789	3.50941
	27.5701	5.67289
	28.1957	6.46358
	10.4173	14.8708
	15.6765	1.64218
	22.8897	10.1301
	22.1197	7.24727
	31.3686	4.01
	18.3521	4.77306
	16.0861	5.51466
	19.9508	2.46188
	23.7849	1.93265
	44.8643	5.45883
	11.8125	7.54831
	27.3583	13.8324
	21.6591	14.9484
	16.1774	5.35419
	17.4556	1.16915
	15.1331	5.95294
	18.7948	7.06564
	16.5702	5.12558
	13.0927	7.21836
	22.8566	5.9478
	21.0443	3.49603
	6.97144	6.27437
	10.5458	8.52517
	14.9677	3.2764
	4.14003	4.48062
	16.1397	5.35696
	20.2566	9.43589
	21.2072	15.7737
	26.0306	9.16951
	25.0505	20.5901
	17.4588	5.96015
	19.1932	4.07908
	20.1797	14.3292
	18.9665	16.8976
	25.8933	13.5135
	16.4594	11.4789
	17.0026	8.24761
	17.6287	5.14267
	21.513	3.84993
	17.4427	5.47444
	13.2461	5.13265
	11.4953	4.83964
	24.6924	7.55176
	32.2497	2.80632
	19.6773	22.0881
	22.475	5.65742
	12.296	4.23321
	24.1295	7.16154
	16.4844	4.41443
	23.5149	1.50104
	1.41168	8.83168
	10.6708	7.14521
	21.122	4.16756
	26.93	4.60624
	6.92577	4.92469
	13.8358	7.26766
	23.0647	11.9766
	17.2624	4.6003
	13.1565	7.4299
	18.6587	4.06267
	20.1195	3.7527
	17.4815	9.39527
	20.8501	4.42212
	12.8462	9.58798
	19.3823	5.61595
	19.2863	7.79708
	9.92377	4.68998
	11.4858	13.9076
	6.09271	4.11988
	3.19719	6.8242
	23.4337	7.92273
	26.0447	11.6475
	21.3546	8.73114
	17.4633	1.92205
	27.4092	4.86262
	12.6763	3.65983
	10.243	5.9955
	20.705	5.95939
	13.1114	9.31429
	18.8434	13.0286
	17.8198	3.89391
	16.0336	7.44419
	18.6381	20.487
	15.4568	10.832
	18.5026	15.3541
	10.0681	11.5586
	23.1553	10.4397
	19.1574	4.43297
	17.0054	7.21077
	15.9834	10.4581
	19.7481	5.91331
	20.7406	10.5316
	17.1773	5.87967
	18.4176	26.6098
	24.2294
	23.9464
	25.584
	11.6336
	14.3273
	13.2498
	14.7546
	13.8168
	8.6121
	15.284
	19.9198
	25.3771
	18.4035
	23.3468
	22.375
	20.0301
	17.1662
	13.5982
	18.4034
	21.7997
	17.9962
	18.5812
	28.0521
	7.34489
	22.9775
	37.4715
	19.2191
	17.6626
	19.8066
	23.0083
	25.4573
	19.4871
	23.1105
	25.4444
	27.1764
	23.5298
	20.7046
	15.4368
	21.419
	19.9959
	9.96586
	13.7058
	21.2713
	20.4209
	22.0477
	25.1284
	11.1208
	21.0962
	22.611
	17.4495

## Sheet: Fig 6E
Source Data	Figure 6E	AWC VGLUT-pH data: individual dF/F(%) traces
		Three trials per animal: Read from left to right; Trial 1 signifies a new animal
		Acquisition Rate: 5 Frames/sec
		Stimulus ON:	Frame 150
		Stimulus OFF:	Frame 450
	wt VGLUT-pH																unc-11(e47) VGLUT-pH
Frame / Trial #	1	2	3	1	2	3	1	2	3	1	2	3	1	2	3	Frame / Trial #	1	2	3	1	2	3	1	2	3	1	2	3	1	2	3	1	2	3	1	2	3	1	2	3	1	2	3	1	2	3
1	2.47351	3.95883	3.54318	2.44559	2.33845	2.21185	4.63056	8.15552	3.00349	4.42961	4.45408	4.4344	4.89687	6.04591	5.54502	1	1.02633	3.48914	1.74563	5.9311	5.07751	4.91466	6.33015	5.89966	4.47491	5.3634	6.03365	5.33658	8.37627	4.02615	4.58594	1.03826	6.1675	4.14542	1.80282	5.10699	8.44134	5.61198	4.02708	1.89568	2.12524	5.41503	-1.05288	4.28039	1.66011	2.92024
2	3.45624	2.42174	2.72993	2.68322	2.40553	2.86986	2.41371	7.32972	4.25987	4.74846	3.50596	5.83668	4.10289	4.36556	5.50523	2	1.11268	2.65125	1.26037	6.28254	4.06678	4.55219	5.74233	6.89947	3.95205	4.96649	4.51795	6.36663	5.52289	3.59241	4.75597	0.421372	5.69142	3.18119	0.681162	5.50127	7.68019	5.39269	4.36432	3.24362	2.51344	5.39954	-0.903875	4.42078	1.70001	2.14518
3	2.33218	3.47509	3.67863	2.4908	2.21469	3.76581	2.45898	6.2563	3.26375	4.98207	1.8483	4.93846	4.32637	5.48845	4.48815	3	1.18366	3.86864	1.25317	5.56437	5.48015	4.31212	5.95704	6.8151	3.39287	5.35679	5.39266	6.19614	4.73799	3.75101	4.30915	0.41375	3.73093	2.61723	1.83725	4.18406	8.01693	5.99854	4.07723	3.66003	2.62735	3.92468	0.984611	3.33654	1.56336	1.81317
4	2.50631	3.64408	3.261	2.17017	2.03785	2.18769	3.67684	7.90451	2.94499	4.58717	3.94485	5.73732	4.72314	4.79666	3.8626	4	0.46015	1.80035	3.05101	5.70753	3.82944	5.65227	6.30528	6.62956	3.74525	4.53245	4.75278	5.56394	6.81148	3.67121	4.07333	0.85395	5.77496	3.5172	0.692929	5.77472	8.01025	7.67461	4.00718	2.93125	1.40006	4.30259	-0.454499	3.15106	0.68071	1.3344
5	3.15697	3.54174	3.70347	2.46524	1.51314	2.86443	2.60703	7.14011	3.78419	4.90924	4.06154	5.34341	3.55958	5.24056	4.83191	5	0.0206047	2.73064	1.65902	6.39778	4.33641	4.9719	7.12637	7.19184	4.53338	4.58025	4.88592	5.16639	6.03442	3.07484	4.16477	0.373069	4.84833	4.23956	0.309845	5.3691	8.76143	5.59723	3.64923	3.80734	2.2118	4.51754	-0.0220111	3.01205	2.08142	2.68735
6	0.936457	2.77436	4.35533	1.94023	3.35239	3.14498	2.67324	6.96826	3.40846	4.73024	3.31054	5.47435	4.10016	4.48012	5.20007	6	-0.194234	4.13578	2.01184	5.74988	4.83511	4.60196	6.70176	7.40241	4.22115	3.61626	5.87445	4.04526	6.61107	3.08561	3.49243	0.117159	4.65319	4.11567	1.46019	5.14342	8.55945	5.03444	4.10371	3.35066	2.11384	4.30146	-0.836893	2.36678	1.68258	2.73461
7	2.57689	3.3316	3.51173	1.74902	2.68445	3.09276	3.89634	7.36512	4.35379	4.33829	4.82304	5.03514	3.6718	5.45864	4.29407	7	0.740347	2.6197	2.22904	5.9724	4.45632	5.76657	5.73535	7.52349	5.04392	5.28848	4.62472	6.8813	7.29755	3.46101	3.86359	0.996988	4.30236	4.22113	1.49424	6.02971	8.51443	6.80217	3.91161	3.03972	1.87062	3.89455	-0.101868	3.27903	1.98542	2.02299
8	2.32079	4.07738	3.51658	3.02274	1.47263	3.2428	3.85294	7.98042	3.79359	3.76948	3.86313	4.81271	3.84496	3.96547	5.01475	8	1.08517	3.10601	2.91447	5.25111	3.74087	6.41491	6.69918	6.98679	4.00136	4.42131	6.10132	4.98183	6.56475	3.94824	4.12467	-0.561003	6.24504	3.67939	0.649092	4.0434	7.9476	4.42746	4.36516	4.2217	2.02458	3.73959	-0.022834	2.75771	1.86046	1.35403
9	1.62576	3.82528	3.00729	2.37044	3.07122	3.21273	2.53647	4.6945	3.1468	3.78971	2.7129	6.15988	3.44774	5.95306	5.24447	9	0.414697	3.87216	2.29943	5.25951	4.9075	4.34861	6.67796	7.50919	3.62957	4.1792	5.19695	6.05923	4.80095	3.90005	4.73882	0.216537	5.22893	4.52319	1.34593	4.76614	8.77048	5.46318	4.04533	3.49719	2.31804	5.78116	1.1026	2.01392	1.75428	2.52548
10	2.95904	3.20665	3.73586	1.57336	2.63982	2.79727	3.9037	5.69764	3.26226	5.30953	3.27478	4.93898	4.34008	4.93798	4.96831	10	-0.335146	2.37075	3.60986	5.0257	6.01536	4.4151	6.21902	7.47029	4.16838	3.69758	5.16417	5.72954	5.19486	3.03207	4.80022	0.223881	4.72146	5.95267	0.760344	5.8531	8.05781	4.93679	3.65844	3.92294	2.02032	3.11485	1.2815	3.3838	2.70758	1.10278
11	2.59195	3.41782	3.34355	2.80744	2.40192	4.25572	4.31154	6.81366	4.2358	5.13324	2.46141	6.00509	4.57212	3.76146	4.6924	11	0.519872	3.83467	1.85533	6.18895	2.51877	6.1616	6.82382	6.19927	5.15609	4.99159	5.71905	5.14109	6.36449	3.42643	3.37929	0.791155	5.836	3.50521	1.3075	5.0058	7.55449	5.5315	2.63401	3.72852	3.06614	5.36726	-1.06337	3.07965	1.25972	1.35104
12	1.72555	3.17713	3.03614	2.08864	2.04977	3.00314	5.15287	5.42038	3.49491	4.58475	3.15798	5.94628	5.09867	5.524	4.2036	12	-0.717012	3.07588	2.43026	6.80211	4.94354	4.47513	6.23571	6.53211	4.01188	3.93342	6.02728	4.77392	5.52076	4.03586	3.98237	-0.496816	5.2315	3.58531	1.07414	4.49734	8.56747	2.7399	3.10007	3.4178	2.59697	3.85704	-0.534952	3.79791	1.01373	2.20885
13	3.00053	4.46707	3.05179	1.51059	0.640054	3.32398	3.16778	7.08234	2.90775	6.0053	3.73741	5.6043	4.0608	5.35601	3.66523	13	0.0758125	3.98345	2.84926	5.46687	4.59682	5.55906	5.52232	7.60236	3.9017	3.74802	4.893	6.44992	7.18571	3.38149	3.66385	0.414775	6.45856	3.79787	1.36099	4.47052	9.41795	5.82024	3.52823	3.17112	1.23842	4.52155	-0.405937	2.68728	1.56392	2.7573
14	3.63828	4.17115	3.63681	2.45046	2.15791	3.72754	2.89123	7.6358	3.22183	2.89881	3.03041	5.78537	4.14159	4.45054	5.46711	14	0.5997	3.52987	2.38229	6.73516	4.23602	5.07356	6.61844	7.50874	4.78473	3.63067	5.33791	5.32998	6.11332	3.3828	5.38409	-0.967813	6.54868	4.25184	0.835708	4.53925	7.9797	3.01753	3.79739	3.1418	1.47366	3.52315	0.393309	3.398	1.88682	2.3874
15	2.08156	3.18116	3.56626	1.6967	1.31423	2.40323	2.71681	8.00063	3.2764	4.6824	3.8368	5.49553	4.21479	5.5038	3.61387	15	0.284532	3.85218	2.68254	5.07975	4.48909	4.67045	6.62943	6.2098	3.64369	4.47873	5.56777	5.71878	6.89166	3.38411	4.52467	0.153291	6.00861	3.76261	1.25993	4.86122	9.00064	6.13423	3.43875	3.42403	1.24859	3.95184	1.23389	3.26892	1.1412	1.97157
16	2.62372	4.16219	3.33395	2.73114	1.88505	3.63693	0.933183	6.19564	4.157	4.67974	3.6909	5.2838	4.8365	5.52161	5.46033	16	0.874329	4.64055	2.97842	6.41734	4.39141	4.97148	6.66896	7.41256	3.27635	4.17939	5.61511	4.83304	7.57206	3.71419	3.3652	0.6329	4.70614	3.14947	1.49305	4.51236	7.45019	4.95425	3.75132	3.34442	1.26857	3.88182	-0.927587	3.39198	2.74905	1.6614
17	2.79186	4.15196	4.3305	2.68559	3.81261	2.67951	3.98201	6.0449	4.12053	5.12173	3.93563	4.50709	3.69272	5.72917	4.25664	17	0.535127	4.09585	2.46212	7.67485	4.09702	5.6557	7.6245	7.36306	3.38064	4.79395	5.27051	5.58259	6.9303	3.83902	3.07222	0.636612	5.72842	2.77036	0.936449	4.57121	8.85503	4.91981	3.68216	3.23472	0.859301	3.9861	-0.840246	3.32306	1.76471	2.4406
18	2.33833	4.33363	2.76165	2.36413	0.909646	2.7883	2.78162	8.63719	3.87414	6.67692	4.64368	5.68158	5.06395	4.55249	3.31926	18	0.0168937	2.7499	3.17431	6.698	3.99166	5.37847	7.55038	7.12775	5.01337	4.54611	5.4729	4.49711	6.42665	4.07093	4.05037	0.895302	4.51768	2.19789	0.918394	4.364	8.08845	4.65101	3.59102	3.17286	-0.278969	3.92318	-0.628554	2.25878	1.58098	1.0884
19	0.832518	2.63809	3.84437	1.83159	2.7725	2.9986	4.28312	7.11255	3.11046	6.02621	3.9536	5.42157	4.68577	5.10763	5.25807	19	0.724009	3.50684	2.1029	5.79844	4.45291	5.14837	7.40662	6.04842	4.53973	4.89782	4.91381	4.41989	6.32755	3.27647	3.6276	0.79446	6.79966	3.78582	0.702172	4.06242	7.67193	4.56768	3.72638	2.65425	2.3202	4.69556	1.75048	2.72594	1.1754	1.74809
20	2.30888	3.87243	3.78244	2.45839	2.07164	2.91318	3.40537	6.46558	3.55388	3.95593	0.938732	5.47397	3.67054	5.05835	4.15956	20	0.666688	4.15563	2.63729	6.53947	3.99746	5.67773	6.86982	5.28316	3.7442	4.27856	6.02583	4.83008	7.029	2.97892	4.49076	0.571971	6.12264	2.51094	1.06658	4.53304	8.69153	6.58168	4.09662	2.92833	1.94853	2.8051	0.966602	3.26638	1.37088	1.5046
21	2.56268	3.88656	3.40827	3.09729	2.23203	3.40981	3.52712	6.85182	3.69247	4.35368	3.44663	4.45644	3.24212	5.29904	4.69843	21	0.150706	2.69096	2.32768	6.61694	4.39838	4.81884	7.19327	5.63062	4.33441	4.7917	5.68244	5.35218	6.69594	3.99868	3.94935	0.274323	5.05718	4.28337	1.74189	4.94833	7.82745	4.22465	4.21607	3.39614	2.09186	4.11759	-0.0652388	1.24917	1.03183	1.09835
22	2.26004	3.91815	3.30816	1.84978	2.8304	3.15138	6.15929	7.25866	4.29278	6.34686	4.51109	-8.39444	5.27992	5.25723	4.46641	22	-0.03716	3.95398	2.71367	5.67032	4.39103	5.39697	8.27438	6.31126	4.24186	4.0327	5.29107	5.43619	7.66895	3.76839	4.0795	0.487547	5.08843	4.92539	1.0144	5.28518	8.63662	5.00702	3.3586	3.41833	2.07331	3.95015	0.757161	3.04039	1.43163	1.70609
23	2.36921	5.52548	2.41685	2.61825	2.21038	2.91533	2.79641	5.97985	2.29808	5.7559	3.98801	5.1914	4.70519	5.02754	5.67248	23	1.19365	3.2516	1.12058	6.22048	4.50184	5.34478	7.76137	5.89163	3.6028	3.78326	4.6627	5.52008	7.69676	2.69479	3.89468	0.52715	5.96888	3.19152	1.05274	4.05323	8.34749	5.24872	3.54474	3.46408	0.755378	4.05313	-0.339383	2.93563	0.624179	2.31111
24	1.49906	4.20275	3.09555	2.03176	3.06324	2.42126	3.73633	7.53161	4.59437	5.36691	3.20529	5.32124	6.38282	4.55854	4.69749	24	1.11424	2.96254	4.51791	5.26897	1.99006	5.43028	8.69029	5.57693	3.12502	3.95192	4.76318	5.79838	6.88567	3.13761	4.29403	-0.160598	4.35022	3.48429	1.00409	5.28513	8.53775	4.41883	3.54684	3.83222	1.38269	4.27767	0.040383	2.31033	0.864224	1.7964
25	2.68459	4.41124	4.11732	2.2316	3.02784	2.77732	3.64086	8.978	3.20503	5.77224	4.28789	5.63672	4.48672	4.85625	4.06467	25	0.639749	1.90394	2.02817	6.03684	4.31195	4.81687	7.93643	5.14027	4.0231	4.16974	5.14346	4.84321	5.61174	3.2535	3.57893	0.811316	6.02452	2.77097	0.261166	5.4589	7.57306	5.98428	2.35107	2.82146	1.65888	4.57489	-0.0628956	3.93917	2.43915	2.66432
26	2.83922	4.25255	3.73793	2.48098	2.84853	2.06397	2.71467	5.56184	4.93523	4.96048	4.07912	5.89904	4.02324	4.41993	5.04968	26	0.166106	3.45734	0.633516	6.11975	4.00732	5.2825	7.89039	6.25982	3.2612	4.48308	3.90699	6.25056	6.54838	2.97805	3.26087	-0.663917	5.28988	3.65336	1.64843	4.9934	8.77873	5.54733	4.39048	2.61217	1.45073	3.49684	0.923461	2.64304	2.26317	1.64774
27	3.81383	3.94761	2.71548	3.02115	3.331	3.31109	5.38231	7.32167	3.47587	5.962	3.90133	5.66457	3.99762	4.80683	5.26224	27	0.571182	4.70584	3.26437	6.03344	4.78724	5.11925	7.40659	6.04926	2.91768	4.4445	5.66774	5.72687	7.34484	3.45077	4.43451	-0.239844	5.34134	1.99217	1.16372	4.81006	8.54251	4.78588	2.62951	3.44916	1.91835	3.46398	0.527558	2.85902	1.4537	2.32894
28	3.15795	3.9353	3.84636	2.05627	2.97139	2.73818	2.80514	6.47194	3.38118	5.00485	4.02548	6.01667	4.48402	5.15704	3.94275	28	0.964402	2.93534	1.53235	5.80854	4.1393	4.30239	8.49661	6.11274	3.24392	4.45259	4.23885	6.16371	5.04972	3.60519	4.41392	-0.312608	4.86476	3.58392	1.1929	4.37845	9.1163	4.30646	2.79519	3.4784	0.90391	4.78014	0.383808	3.07719	1.70005	1.43177
29	2.57355	2.03801	2.9189	1.30711	2.39941	2.07097	4.76557	5.762	5.03762	3.87859	3.92683	6.50587	4.96873	5.4618	4.50944	29	1.40117	3.6835	2.51746	6.15534	4.50289	5.19397	8.18186	5.92241	3.45124	4.19521	5.16626	4.73322	6.89245	3.48543	3.50794	0.819164	5.51386	2.96461	0.948731	4.9789	7.87257	7.00576	3.26271	3.03874	0.881992	4.02157	0.49932	3.3727	1.52657	2.10266
30	2.52907	4.28385	3.49885	2.05645	0.959144	3.27931	3.83894	5.64824	1.61143	5.04462	5.17241	3.96995	2.80046	5.10297	4.44168	30	1.31084	2.61055	2.42369	5.0585	4.62315	5.73133	8.37016	5.4852	2.64031	5.15037	5.45138	4.75283	6.12184	2.66826	4.04695	-0.695188	6.44481	3.90475	0.741799	4.40452	9.16212	4.33013	3.71782	2.76737	0.813026	2.45122	-0.3394	3.91858	2.80619	1.54731
31	0.716055	4.19927	2.4321	2.19231	0.843746	3.02023	2.66992	7.04046	3.19566	4.96967	2.91297	5.26842	4.53237	5.33141	4.98508	31	1.07756	3.05866	2.87469	4.92931	4.5871	4.79537	9.06086	6.45196	3.05687	5.03729	5.79493	4.76003	5.61019	2.52986	4.04443	1.03421	5.69151	4.01174	0.445329	3.4818	9.8851	5.12284	2.95046	1.95685	1.443	3.56017	0.618896	3.33111	1.60506	0.837196
32	1.74778	3.53174	2.9326	2.60595	2.37774	2.68392	3.65856	6.66507	3.31559	5.25638	3.84456	3.95005	3.81875	5.38788	4.6161	32	1.23711	3.45067	1.90088	5.62999	3.84066	5.21964	6.93265	5.23777	3.53338	3.36796	4.61829	5.12035	6.83494	3.57767	3.90265	-0.0490373	4.20032	3.55485	1.25001	4.843	8.26315	5.52503	4.5476	3.07151	0.610776	3.98702	-1.46917	3.17757	1.43339	1.78899
33	2.38669	4.38831	3.07707	3.06328	1.97649	2.79081	3.15202	6.62607	3.33158	5.33353	4.2552	5.00277	4.26406	4.77495	5.65542	33	0.618975	5.39396	1.17829	6.01712	4.24692	5.92068	8.50215	6.67942	4.35678	2.84414	5.18229	5.95707	5.95988	3.01452	4.83667	0.3442	5.68335	3.5914	1.63695	4.38466	8.61082	5.69	3.77269	3.294	2.55358	4.13372	0.694664	2.86405	2.14672	1.97467
34	2.6564	3.80247	2.66057	3.10073	1.4663	3.25546	4.10685	5.88331	4.62409	5.44885	2.2607	5.24887	3.1145	4.84849	4.74273	34	0.884758	3.71441	1.73966	6.67536	5.04426	6.05701	8.88069	6.67623	2.18654	5.10946	5.54705	4.54273	7.04677	3.70408	4.74928	-0.452044	4.32343	3.45119	1.27983	4.41782	8.73074	5.50481	4.29043	2.20489	1.1311	4.36132	1.46545	2.50986	2.17154	0.706817
35	2.5325	3.26611	4.292	1.39153	3.19694	2.24356	4.07721	5.40099	3.61822	3.6088	4.36402	5.29358	4.8596	4.94799	4.45175	35	0.556548	2.96769	2.44088	5.74908	3.26221	3.54648	7.71664	5.76128	2.32362	4.21632	6.34493	5.43463	6.34845	2.8849	4.32284	-0.0852706	6.19912	3.74946	1.54734	3.56519	9.35909	4.74426	2.89973	2.57906	2.36659	4.07461	0.569313	3.38772	2.78653	1.69856
36	1.80987	3.85415	3.88111	2.01697	2.74496	3.96542	3.9662	6.79508	3.97428	5.11193	4.4251	6.29222	3.55382	5.43005	4.41885	36	-0.092417	4.41911	2.11475	5.87672	3.95491	5.20896	8.12847	5.12756	3.70156	4.64792	5.73491	6.22183	6.95069	3.0996	4.65182	0.177384	3.85766	3.05022	1.46349	4.04308	9.14188	4.85447	3.67614	3.41183	0.866545	3.43485	-0.0209326	2.97774	3.01614	1.82549
37	2.57249	2.9463	3.32268	2.70517	2.81393	2.81299	4.05604	5.12734	2.87415	3.73128	4.01078	4.94668	4.12331	5.55769	5.10664	37	0.427174	3.58571	3.89689	5.10082	3.8009	5.29503	6.46857	6.23871	3.29602	4.16886	5.56915	5.19298	5.89858	3.38687	3.5662	0.273989	4.49859	3.2413	1.43128	4.545	9.12008	5.69146	3.08983	3.02197	1.11821	3.87579	-0.504033	2.54975	2.40437	2.89725
38	2.78164	4.21568	3.02517	2.07136	2.96138	2.69571	3.51449	7.20387	2.99583	4.97303	2.40311	4.34792	3.71257	4.33528	5.33098	38	2.08874	3.56663	3.5501	6.65353	4.1676	5.07046	8.24447	6.80245	2.57972	4.33508	5.68889	4.3535	6.31547	3.85105	4.03045	0.380273	4.70337	3.75015	0.816404	4.23543	8.36163	6.57505	3.40481	3.06605	1.0893	3.69508	0.328105	3.70363	3.19045	2.33574
39	3.24687	3.56084	3.35493	2.00889	1.00874	2.50734	4.72474	7.77159	3.23671	5.35871	2.59439	4.92196	4.187	5.75028	4.81905	39	1.62351	4.10329	2.36628	5.01597	4.828	5.37708	7.04674	5.3969	3.42034	4.84845	6.1625	5.68967	6.68367	3.06816	3.72905	0.943231	4.85214	2.80374	0.875356	4.82568	9.57643	6.55426	3.75205	3.48248	1.79061	3.93134	-0.180271	2.86604	2.42718	1.97983
40	2.62863	3.37567	3.46149	2.37994	1.6979	3.07837	4.13607	6.51187	4.10839	4.28086	4.76811	4.50358	5.00626	4.8556	4.85167	40	1.83014	3.69175	2.93538	6.27231	3.93002	5.40296	7.53783	5.65871	3.43306	3.32568	4.12176	4.66092	5.99728	2.99558	4.46133	-0.539095	4.90308	3.40623	1.3294	4.41135	9.81435	4.35996	5.10524	3.33672	1.86502	4.12902	0.0181275	2.99901	2.26178	1.62719
41	3.05975	4.01252	2.6553	2.44317	2.2633	2.75695	4.26492	6.68756	4.29692	4.87275	4.20238	5.69176	3.26022	5.71515	5.14334	41	1.11679	3.35932	2.34984	6.24097	4.85972	4.68792	7.90983	6.23594	2.52972	3.15207	5.13738	4.1109	6.95683	3.44606	4.44807	-0.231055	3.58265	2.42739	-0.0423947	4.71212	8.10843	5.66862	3.60913	3.21414	-0.634651	4.59324	0.515431	3.01691	2.95584	0.393294
42	2.1776	4.99909	3.57404	2.70111	3.31352	2.97715	2.96577	6.22506	2.69905	5.51848	3.96214	4.72815	3.89335	5.09166	4.00722	42	2.15277	2.96586	2.75419	6.6344	3.56653	4.73468	7.40409	5.12286	5.17968	3.95011	4.59429	4.94268	6.24887	3.07848	3.30609	0.735874	3.50982	2.80314	1.11767	4.71152	8.48659	5.25968	3.83795	2.80157	1.47047	3.80235	-0.118699	3.19086	2.86781	1.54951
43	2.67985	4.171	2.1235	2.05612	2.51863	2.54233	3.98867	6.84842	5.05354	5.69652	4.21767	5.68569	4.15247	5.20979	5.01525	43	1.06496	4.4326	2.80702	5.78595	4.47223	4.78227	7.32309	6.70348	4.03305	4.02079	4.45233	4.28314	6.11568	3.30641	3.69137	0.269529	4.59509	2.8716	1.23284	4.70793	8.14056	4.61585	3.6134	2.80372	1.44509	3.68052	0.235361	4.10769	2.63825	1.61984
44	3.27925	2.08478	4.15259	1.75978	2.4774	3.39001	2.98609	4.75341	3.60825	4.97582	3.9601	5.02731	4.09438	6.15315	4.3654	44	0.996537	3.70426	2.40296	5.97082	4.5017	5.01375	7.40937	4.62378	3.8673	3.01107	4.78925	5.07552	7.55488	3.22615	4.0047	0.108007	5.00079	2.95773	1.869	4.74111	8.94569	5.40812	3.36325	2.43876	1.71249	3.16477	0.178731	3.01258	1.35059	1.1002
45	1.8008	3.38191	2.76719	1.36206	1.50326	3.4165	4.30865	6.03197	2.74632	5.56838	4.22798	5.1038	4.40922	5.63144	4.81971	45	1.64956	4.31614	1.879	6.26827	4.66659	5.3195	7.47021	5.32254	3.46001	3.68302	5.79383	4.75754	6.58291	3.89423	4.28638	0.639123	3.32361	3.55461	1.85869	4.49971	7.85715	5.27095	2.83424	3.112	0.980718	3.94094	0.461315	3.46931	2.28067	1.59796
46	1.59204	4.20595	3.70574	2.13613	2.09101	3.63919	4.05156	4.8663	3.24681	3.0899	2.46532	5.1526	5.07159	5.30271	4.16994	46	-0.260661	4.44323	2.8118	6.25975	4.77432	5.73819	7.9463	5.38775	3.82789	5.60492	4.80458	4.79138	6.06439	2.86293	4.36505	1.21906	3.64749	2.36826	2.43966	4.60976	7.84944	4.95856	3.51749	3.5169	1.28334	3.67403	1.10639	2.45637	1.87233	2.16083
47	1.69154	3.09147	3.32354	1.90701	3.33204	3.14715	4.00097	6.29353	3.53222	4.67826	3.4166	4.31633	5.21254	4.88889	4.62912	47	0.552408	4.50337	3.3606	6.30339	4.27378	5.11454	6.72184	5.70502	3.82031	4.77189	5.93018	4.33703	5.6695	3.2343	3.46044	0.384809	4.37119	2.17351	1.99681	4.7035	8.41849	3.75428	3.22343	2.93009	1.20347	3.91538	0.698192	2.41666	0.940617	0.522314
48	2.0929	2.53226	3.79024	1.65545	2.79773	3.01547	3.95282	4.01257	3.26105	4.56529	4.78571	5.20822	4.08937	5.76691	3.65405	48	2.0166	4.73147	3.25904	6.62825	4.99483	5.03987	6.74195	6.23912	3.42275	4.41256	4.95494	4.14209	6.55802	3.22904	3.89617	-0.581036	4.50442	3.00909	0.739448	4.33378	7.5388	6.19141	4.51322	2.62983	0.551698	3.79511	0.900913	3.56029	2.78162	0.722162
49	4.02813	2.94246	3.97702	1.25853	3.29682	2.92872	4.86995	6.31831	2.33904	4.12853	4.40623	5.43274	4.4004	5.22509	4.72527	49	1.63976	3.76889	3.0822	5.69884	4.16221	5.82994	7.31034	5.93114	2.66343	4.3496	4.69716	5.48768	5.89833	3.35087	4.14458	0.601182	4.23266	3.14171	1.22691	5.09776	8.51533	5.89117	3.60057	2.31974	0.321601	3.73319	1.09194	2.67414	1.59642	1.96764
50	1.51826	4.32675	3.49947	3.15653	2.93422	3.46753	3.99935	5.16573	3.67809	4.68889	3.37416	5.24286	4.69276	4.75901	5.27589	50	0.313217	3.71474	1.03975	5.71037	2.8988	5.04327	7.07512	6.44231	4.85796	4.22971	3.87664	4.86417	5.92436	3.44233	4.45209	-0.0411018	3.49492	2.63013	1.71755	5.13309	8.10268	4.73508	3.02633	3.39105	0.604799	3.60993	0.87242	3.8068	0.433531	1.79675
51	2.4414	3.58229	2.53946	2.1287	2.50616	2.42592	3.65848	3.76315	3.38582	4.25077	4.87784	5.39871	3.67537	4.12624	3.97804	51	1.80227	3.67549	2.84239	6.38369	4.83296	5.41637	7.10877	5.4181	3.4727	4.04849	4.63786	4.47695	4.98111	3.55372	4.50088	0.458339	3.66898	3.37735	1.35916	4.79436	7.90382	4.76406	4.22531	2.55797	0.508224	3.90929	1.4042	3.72925	3.01843	1.98677
52	3.29186	2.39227	4.00591	1.86065	2.20623	2.5304	3.07289	6.03719	4.41662	5.34727	4.53172	5.70125	4.97239	5.12764	5.02835	52	1.42903	2.4198	2.09744	6.20917	3.73517	5.50105	6.48707	6.5617	3.76609	5.4609	4.57274	5.0717	6.15916	2.81928	3.02981	0.260559	4.80636	1.25055	1.63578	4.83592	7.52269	5.69222	3.3701	3.5906	0.510826	3.54412	0.502877	3.3656	2.59728	1.35084
53	2.11007	1.84145	4.34419	2.37281	0.765371	2.32084	4.37474	6.08333	3.91463	3.59043	3.2877	4.49114	3.74881	5.37627	4.64761	53	2.01003	2.98832	2.34928	6.29074	4.34641	5.88963	6.86745	6.62193	3.92878	4.5288	3.97174	4.51542	6.59024	3.5527	4.43944	-0.139182	4.09257	2.31116	1.95862	5.42324	8.33388	4.58953	4.26498	3.24207	0.531015	3.13254	1.93472	1.82519	1.90907	1.75201
54	2.83223	4.09031	3.44517	1.26785	3.56712	2.85241	5.60354	6.4234	4.28255	4.71029	3.39176	5.68828	4.93093	6.04261	4.33471	54	2.2791	5.00849	2.09736	5.96225	4.90664	5.44389	6.69261	6.66434	1.67897	4.80655	4.71615	4.70872	6.43604	2.63674	2.62205	0.0104668	4.74386	3.63249	1.86066	4.35184	8.60513	3.77039	4.16445	3.2869	1.22077	4.3479	-0.0635199	0.867388	2.4176	1.61096
55	1.59687	3.43026	3.27176	1.43021	2.88311	1.92402	4.36312	5.21955	3.78699	3.94944	3.01171	4.11878	4.74473	5.69284	5.21839	55	1.47145	4.34588	2.25975	6.63439	4.43047	4.83406	6.41129	5.51046	4.50406	4.77825	4.71076	6.17257	6.31292	3.09633	3.41826	-0.22494	4.95754	2.01111	1.46081	5.10183	8.41028	3.86855	2.60801	1.90851	1.65326	4.6695	-0.641186	3.67857	2.83064	1.24148
56	3.5389	2.7176	4.21244	1.71473	2.11361	2.44789	4.51173	6.1998	3.29224	4.96206	3.39322	4.743	2.9653	4.9464	4.23852	56	1.75959	4.2126	1.68299	6.18762	4.87281	4.79269	6.58675	4.71165	4.83176	4.76191	4.03856	7.35241	7.02241	2.53828	4.25679	0.130693	3.16852	2.718	2.07579	4.52819	8.57328	5.32397	4.17754	3.40435	0.196411	4.37268	0.418013	3.59779	1.32898	0.792126
57	1.78326	3.60153	3.90098	1.06457	2.55491	2.16855	5.07501	4.93443	3.55445	4.68021	1.68442	4.91267	4.45045	4.19523	4.7632	57	2.697	3.3608	3.9211	5.17878	1.09374	5.73901	6.3922	5.8548	3.93392	4.34973	4.33763	5.45306	6.71079	2.61279	4.04595	0.686201	3.59894	3.65358	1.96556	4.33892	8.56678	6.12365	3.1847	2.66309	0.415584	2.32741	-0.388563	3.15174	2.15028	0.967982
58	1.92905	3.43265	2.94777	1.63665	1.52068	1.87025	4.39968	6.09341	4.05292	4.66583	3.61679	5.55967	3.80982	5.0791	5.30635	58	1.38481	4.18048	3.40059	6.03298	4.3238	4.16223	6.31498	4.32887	4.02419	5.11738	4.02536	5.60444	6.06305	2.73845	4.47784	0.782983	3.703	2.55689	2.6672	4.10708	8.76607	3.97471	3.7077	3.13597	1.76771	4.33223	1.32133	2.71867	1.23808	1.15931
59	2.35674	3.37842	2.94216	2.45051	0.77614	2.17124	4.98645	6.78114	3.4524	3.98874	4.06336	5.28893	4.2988	4.91508	4.21915	59	1.6771	4.20032	2.69406	6.46677	3.99503	4.68996	5.81047	5.85799	3.95977	4.53252	5.76668	6.6822	7.10282	2.93093	3.56916	0.200039	4.58376	2.02677	1.65372	4.56414	8.29987	5.72062	3.45109	2.43238	1.57751	4.13239	-0.199567	3.51442	1.23599	1.79329
60	1.47534	3.89817	3.52458	2.69485	2.95222	2.32078	4.9654	5.65104	3.92687	4.92846	2.68148	4.61435	3.85882	4.6514	4.97795	60	0.918737	4.80064	2.53364	5.19314	4.56326	4.59668	8.08913	5.28196	3.62901	4.52514	5.02488	4.96423	6.75614	3.29367	4.42141	1.37966	3.14905	2.762	1.34777	4.4391	8.58364	4.64543	4.32932	4.1907	1.39506	3.61771	1.05268	2.74379	1.94784	1.00817
61	1.7708	2.57373	4.7346	1.68663	3.71089	3.3879	4.7952	6.82525	4.80209	4.9202	4.38355	4.55203	4.11816	5.88272	4.14852	61	1.67558	4.06855	1.55534	5.9535	4.56238	4.36357	6.97348	6.20649	4.18445	4.0091	4.40035	4.90538	7.51489	2.60293	3.93572	0.532791	3.44602	3.32303	1.55212	4.43306	9.83229	6.39044	4.49054	2.46241	1.23873	2.41858	0.232036	2.31716	1.88946	1.91717
62	2.64612	2.583	3.61472	1.33654	0.706418	2.48224	4.82357	5.76208	4.88788	4.27421	2.97384	5.56599	3.52481	4.73169	5.11718	62	0.232969	2.89528	3.37289	5.83329	5.04279	4.80706	6.94459	4.85438	5.28703	7.16899	2.71711	-17.9319	6.41612	4.21691	3.40457	0.355277	4.24131	2.81958	1.54695	4.01464	8.78933	4.76861	4.16127	2.81426	0.896006	4.26368	-0.215828	3.77799	2.05854	0.992492
63	3.48234	2.10831	3.6617	2.6436	1.98558	2.10837	4.0724	6.11998	2.66612	3.54738	3.59352	5.36658	3.90391	4.83679	4.7199	63	1.40091	3.47211	3.92775	4.87718	5.56461	3.96289	6.70852	5.85684	4.74165	5.42751	5.16475	6.42539	5.91743	2.39526	3.82588	1.51875	3.35354	3.05231	1.84999	4.45091	8.47554	4.3373	3.30083	3.0863	1.80078	2.36935	1.07884	3.27387	0.961393	1.44963
64	2.92534	3.45901	3.77574	1.76302	2.13583	3.01211	3.36692	6.01596	4.49093	5.30543	3.55	4.97111	2.47325	4.50549	4.90093	64	1.93116	4.93563	4.42611	5.3811	3.99331	4.88269	6.16183	6.52611	4.10439	5.56435	5.84823	5.6928	7.06994	3.01482	4.25934	0.825729	3.79251	3.33277	2.20049	4.40507	8.84374	5.2286	3.81908	2.96983	0.957353	3.06083	-0.0348404	3.16632	0.829983	1.29695
65	3.1265	3.60855	3.45736	2.67951	2.7029	3.08001	3.96284	6.62463	1.37486	4.44538	4.36169	5.1608	4.23143	5.12364	4.66099	65	2.12746	4.68221	3.16139	5.84314	4.42793	4.05846	6.70952	5.61896	4.23197	5.4349	5.77961	5.47657	7.67495	2.71957	3.4352	0.372174	4.4703	3.10736	1.59681	4.24135	8.3424	5.50831	3.95828	3.48306	0.379753	4.11375	2.00309	1.9382	2.28793	2.18522
66	1.86738	2.62816	3.03142	2.49916	1.22581	3.12149	3.86134	5.76394	3.56878	4.52779	4.24348	4.64414	3.19465	4.82825	4.43053	66	1.98543	3.80048	3.67581	5.18267	4.74568	4.26492	6.90771	4.35478	4.06224	4.29469	4.13235	6.41612	8.00972	2.24118	3.27298	-0.013035	4.206	3.60924	1.57382	5.23873	8.59667	3.37824	2.86224	2.4324	0.972107	2.73386	1.44949	3.97834	1.87456	1.20262
67	3.0095	4.67792	3.99782	2.48459	2.17219	3.03446	4.34731	6.61361	2.41722	3.5602	3.97582	5.14404	3.01677	4.5199	4.89634	67	0.852116	4.66963	3.56826	5.61755	3.95111	5.07229	6.83603	4.99476	5.12264	5.0247	4.58885	7.51703	6.92702	2.84033	3.53562	0.0297857	3.75292	3.3429	0.737453	3.97716	8.29748	5.41078	2.92257	3.25645	0.581368	3.96657	-0.97725	1.35873	1.62372	1.1306
68	0.979734	4.18676	2.96352	2.00042	3.44149	2.23659	3.45223	6.09609	3.47498	4.72752	4.09049	4.2803	3.47666	5.14119	5.09286	68	1.73885	5.33338	3.11694	5.98396	5.36305	5.75761	6.26513	6.13784	5.44522	4.86012	4.10321	6.23219	7.85268	2.00401	2.61902	0.268626	2.97345	2.06386	2.51545	5.03139	8.75071	4.78799	3.58844	2.8906	1.39751	4.11092	0.938063	2.96383	1.77851	1.07386
69	2.96645	2.37045	3.05281	1.51979	3.1945	3.36785	3.75119	6.07064	5.05687	3.14226	3.46392	5.99102	4.26885	4.82763	5.3494	69	1.12669	4.39467	3.76266	5.59371	4.81015	4.87929	5.82074	4.09332	5.0341	4.85416	4.42336	5.31324	4.88104	2.01902	4.30328	0.528546	3.52914	1.55046	1.39784	4.82295	8.06787	3.93511	3.34032	4.08201	0.833904	4.24132	0.78657	3.32302	2.63209	1.32914
70	2.66312	3.51071	2.88897	1.83158	1.94015	1.41789	4.87675	6.13767	5.37381	4.13741	4.26858	5.07606	3.7497	6.09072	5.48971	70	0.262391	5.1704	2.92987	6.38884	5.26304	4.45575	6.95958	5.14261	4.85439	4.71046	4.81164	5.37546	5.10016	2.36346	3.91665	0.221183	2.6237	2.96677	1.95497	4.35959	9.17158	6.16003	2.82933	2.8508	2.34642	3.49777	0.165335	2.77755	1.86547	1.89801
71	2.6607	4.12607	2.86304	1.73897	3.30267	2.38655	4.48386	6.65483	2.59102	4.30797	3.20135	5.16503	5.34032	5.75714	5.60434	71	2.38857	4.0013	3.3422	5.59481	5.68532	5.03792	6.67516	5.49916	4.25886	4.33231	3.78582	5.18181	6.74636	3.04036	4.41815	0.228178	2.61462	2.25416	1.90474	4.29637	8.11228	3.5698	2.99842	2.88929	1.91733	3.66905	0.907326	3.95278	2.43143	1.69204
72	3.13185	3.75802	3.85075	2.02942	2.79534	2.26989	4.78839	6.71858	3.04877	3.42827	4.44538	4.46419	3.73912	5.165	3.71334	72	2.0561	4.12297	4.44595	5.79641	4.41747	5.6418	6.84858	7.2413	4.39856	5.10663	5.3537	4.95061	6.21139	2.33483	4.11291	0.302771	3.06564	3.10906	2.33103	5.58145	8.71287	5.47811	3.48834	3.7286	1.63149	3.66061	1.70237	2.03762	0.490927	1.8026
73	1.51373	4.11286	2.60662	2.46147	1.60767	2.24206	4.05628	6.2676	3.31242	4.20396	3.04412	5.39283	5.03788	5.53784	4.92381	73	1.44034	5.69325	2.54704	5.86228	5.10872	4.23138	6.37143	6.34593	4.35381	4.81194	4.77656	5.29924	8.49981	2.68036	3.51461	0.314016	2.70934	2.59148	2.18535	4.81836	8.90535	4.89618	3.79067	2.48968	0.854041	4.23992	0.550056	3.3474	0.883026	1.21519
74	3.37743	3.56093	2.82735	2.24812	1.89307	3.24923	4.23547	5.0441	3.81827	3.88125	4.07113	5.04195	4.1681	5.42293	4.87543	74	1.46474	6.64271	2.55267	5.00229	3.33981	4.92382	6.353	4.89122	4.61787	3.49794	4.10528	4.8776	7.21275	2.94916	3.99437	0.75524	3.06575	2.67754	2.2701	5.09195	8.42716	4.5761	3.34874	1.43289	1.29851	4.10222	-0.0628224	3.99937	1.9959	1.93942
75	2.75009	3.83883	3.62684	2.0659	2.00412	2.70199	4.96871	6.19639	4.30174	4.00368	4.60947	5.03608	4.23561	4.66436	4.76526	75	1.28005	5.46375	3.67805	5.66418	4.73228	5.1534	6.84783	5.10399	4.07704	4.15787	4.67765	2.78155	8.1809	3.14469	4.08917	0.687421	2.50318	2.01831	1.51848	4.20809	8.72085	3.75109	3.5413	3.54203	1.70314	4.7363	-0.258172	2.1647	1.69818	0.241206
76	2.07616	4.28529	2.62899	2.64998	3.21792	2.31744	4.9572	6.29099	4.17742	3.41839	4.28927	4.76662	5.15776	4.28976	5.00624	76	2.6817	5.29737	3.71942	5.37232	4.6009	4.90967	6.24997	5.52682	4.43138	4.64227	4.92033	5.06365	8.4527	2.70211	3.92479	0.38098	3.53463	2.56947	2.05474	3.45351	9.3313	4.35395	3.87203	3.1377	1.63673	3.38217	0.791624	2.78169	1.79387	0.490725
77	1.20377	3.13836	3.42573	2.14251	3.11851	2.66865	4.50887	6.53861	2.93674	4.42919	4.58748	6.38737	3.67203	5.53961	4.85323	77	2.10677	5.96383	4.49387	4.95132	4.74547	5.52376	6.88676	4.44682	4.82635	5.36872	5.48406	6.08087	8.3457	2.14871	3.05182	0.192583	2.76289	2.34663	2.19943	4.83982	9.62036	3.66013	4.53317	2.85587	1.16309	3.06728	0.881145	2.48493	2.32363	1.6377
78	2.50454	3.5684	3.02888	1.30009	3.33754	2.80296	5.12833	5.68028	3.51857	3.79737	4.62319	4.68165	2.93296	4.56512	4.02822	78	0.75731	5.74926	2.73132	3.43819	4.22096	4.75466	7.13565	5.68102	5.37172	4.34536	3.31792	3.8822	7.73873	2.63563	3.11389	-0.341077	2.26043	2.88494	1.997	3.44259	8.72844	4.46041	4.3973	3.20148	1.68171	4.22134	0.533821	2.53794	0.903912	1.64963
79	1.70317	3.29882	2.93218	1.65271	2.85668	2.52182	4.15076	6.58475	4.31052	3.479	3.89214	5.61506	3.75625	4.67139	5.38894	79	2.34546	5.329	2.7113	5.02641	4.98977	4.02259	5.90331	5.62956	5.24044	4.43224	4.69191	5.70474	6.62375	2.70925	3.0148	-0.00313408	2.82869	2.27421	2.49962	4.33097	9.18385	4.63946	3.37403	3.14227	0.344326	2.88268	0.400473	3.46331	1.00503	1.16786
80	2.45281	2.87805	2.98967	0.85586	2.14469	2.80881	3.68236	5.70745	3.16291	4.40582	3.10786	5.32571	5.0548	4.84836	4.81066	80	1.30456	4.57029	3.8505	4.82418	3.61169	4.96312	6.35056	6.56728	4.53659	5.19486	4.07988	5.2782	5.50648	3.07544	3.91484	0.0401548	2.96871	2.57706	2.28511	3.46872	8.68692	4.51199	2.32488	3.6176	1.56878	4.32612	0.925576	2.15574	1.13252	1.23409
81	1.32121	3.81359	2.69538	1.41584	2.51941	2.15674	5.02739	4.9334	4.79127	5.22756	5.30637	5.68631	3.5791	4.46936	5.16845	81	2.0769	4.69126	3.1035	5.56299	3.93114	3.41346	6.12839	5.06822	5.10588	3.97746	3.99863	4.8211	5.34463	3.23637	3.11686	0.216199	3.63346	3.18009	1.21224	3.81348	10.071	3.61168	3.69697	2.59346	0.433604	4.22045	2.07264	2.96072	2.21749	1.80398
82	2.48225	3.23734	2.8433	1.46223	3.08688	2.32623	2.53435	6.12147	2.58433	5.09406	2.95442	6.66377	4.38607	4.72535	4.31317	82	2.10888	5.17933	1.74293	6.16856	4.85842	4.46578	6.16716	5.27797	5.74097	4.81263	4.95276	4.0335	6.28224	2.50322	3.26667	0.388047	2.91967	2.10818	2.00559	4.56906	8.10521	3.59961	3.24145	2.66255	2.40393	2.73083	-0.663871	3.45979	1.86294	1.49176
83	3.57865	1.52418	2.69693	0.43125	2.07128	2.9743	4.88325	6.06167	4.18851	4.32257	3.34714	5.532	5.14138	4.92052	3.81352	83	1.91562	5.06734	3.8459	5.54925	2.91821	4.11321	5.9015	5.29816	5.53962	5.72686	4.37907	4.67785	7.82367	2.42327	4.24448	-0.208668	3.62923	2.21828	1.50784	3.95287	7.79916	4.7854	3.94462	1.71123	0.421271	3.37956	0.389241	2.59583	2.32328	1.50836
84	2.2845	3.0655	3.2711	2.66545	2.71497	2.94572	4.16777	6.09845	4.1144	4.56909	4.23573	6.05825	4.54661	4.28866	5.12292	84	1.75837	5.96363	4.255	5.89548	4.77497	4.93689	5.81335	5.66663	5.90551	4.7402	4.65295	5.55341	4.30022	2.73901	3.75552	0.25615	3.29219	2.51905	2.63172	3.04879	8.4585	4.59866	4.95765	2.00599	1.65527	4.79103	0.085064	3.79002	2.25588	1.40374
85	1.88591	3.49677	3.14507	2.13275	1.37867	2.77254	4.57528	4.2669	4.5684	4.21284	4.65189	5.00267	5.63672	5.22418	3.79525	85	2.02102	5.62047	3.79607	6.27737	4.25639	4.62428	6.39643	5.20916	4.33885	4.25785	4.70155	4.62066	5.92902	2.34401	2.79856	-0.0659789	1.99293	1.71121	2.09315	3.74166	8.17358	4.04687	4.31132	3.03799	1.13005	2.81007	-0.261383	1.21281	2.12156	2.0262
86	1.72806	3.78841	3.37726	1.97694	0.821223	2.57419	4.71155	5.9528	3.81857	3.44411	5.14928	5.83989	4.86136	4.93321	5.21085	86	1.47474	5.2956	2.8751	5.11337	5.28583	3.71329	7.40736	5.19269	6.18717	5.20251	4.28797	5.0353	4.92638	2.0595	4.16643	0.169749	2.73683	2.25262	1.52828	4.30072	8.38028	4.30193	4.43823	3.09993	-0.0831702	3.62781	0.671691	2.93903	0.98425	1.41163
87	2.68023	3.58891	3.48975	1.93909	3.57969	2.47855	3.35295	6.31883	3.9281	2.94397	4.92447	5.86502	4.41783	3.70586	4.53637	87	1.18109	5.49656	3.21295	5.23352	4.6429	4.40834	5.85057	4.96447	3.79625	4.81279	4.60904	5.49211	5.97208	2.44021	5.20973	0.815477	2.99589	1.51097	2.94238	3.6385	8.7251	5.34781	3.83512	2.61436	1.73143	4.02264	1.16718	2.10662	1.19102	1.79044
88	3.48786	3.85682	2.58969	2.83566	1.87243	2.63866	4.20911	6.29671	3.40983	4.23083	3.8595	4.47629	3.99923	4.73739	4.52499	88	1.5528	4.89297	2.95646	4.70971	4.93918	4.6452	5.76023	5.61178	5.34064	5.34335	4.11192	4.27351	7.24107	3.48215	3.39459	0.861194	3.26044	2.8721	1.73836	3.64787	7.7235	3.45585	4.31122	2.42401	1.81411	3.14526	-0.285336	3.33815	2.61014	1.77611
89	2.70433	3.69732	3.4841	1.15178	2.3426	2.23387	5.3809	5.17676	4.52821	3.94259	2.93754	5.20067	3.83213	5.14263	4.88153	89	2.3474	5.41431	2.77051	5.66115	5.57125	4.59822	5.13106	5.7472	6.14717	4.35018	4.74994	3.87344	7.23069	2.72977	3.72584	0.886133	3.23622	0.892439	2.08901	4.35688	8.98101	2.91871	3.25167	2.10498	0.505238	4.20398	0.456051	2.84313	1.84542	0.913834
90	2.43142	4.20781	3.00956	2.27142	2.6851	2.97283	4.87222	5.66677	4.67336	3.86574	4.16318	5.52552	3.74506	3.91044	4.88652	90	2.33836	4.83408	3.24878	4.67502	5.00275	5.52705	6.16123	4.57088	4.26592	4.47103	3.98921	4.55295	5.42283	3.07983	3.81899	0.274099	4.06271	1.84396	3.3664	4.17738	9.44654	4.66799	3.84898	3.14801	1.54984	3.18877	1.38301	3.36418	2.21745	2.13092
91	1.24146	3.13557	3.37129	2.37058	3.21209	2.94196	5.73598	4.84939	2.86016	5.6609	4.36532	5.1908	5.13669	2.88367	4.21866	91	2.39034	4.93859	3.10935	5.66691	4.5187	4.48147	6.12112	5.48425	4.29827	5.05711	5.38868	3.59882	4.74206	2.49436	3.44402	1.39645	3.88318	1.10713	2.54482	3.87683	8.7451	4.12119	3.37987	3.1024	0.411222	3.68497	1.13815	2.39685	1.48524	0.943681
92	0.0587163	4.34047	3.22461	1.67032	2.54797	3.48294	5.07784	5.52319	4.19966	4.87539	4.07817	4.99177	4.67351	4.85908	3.70858	92	1.43765	5.48661	2.05865	4.81197	4.59636	4.34573	6.09103	4.31069	4.43925	5.14123	3.58659	4.15692	7.31689	2.07128	3.96176	0.248503	3.45957	2.82318	1.84257	3.58524	8.93521	3.54725	2.64289	2.96745	1.25973	3.49137	0.0710122	1.78379	0.750271	1.72717
93	1.91814	3.49321	3.38687	1.8192	3.1068	3.22215	6.25022	6.00513	2.88814	3.54908	5.10602	5.54535	4.14464	5.21034	3.72988	93	3.24241	5.57778	3.80218	4.39681	4.6601	4.98801	6.31302	5.54848	4.87714	4.09612	3.78331	4.43644	7.01238	2.23888	3.73382	-0.839341	3.24539	2.57733	2.61877	4.14249	8.14747	4.06769	3.44327	3.07665	0.583898	3.48501	1.50082	1.68712	2.74916	0.571374
94	3.30086	2.67363	3.96931	2.04496	-0.18204	2.92934	6.53456	6.29104	4.56524	5.54744	3.73232	5.58531	5.41413	5.16045	3.81428	94	2.22247	5.83371	2.57898	4.48383	4.45882	4.5156	6.28582	5.29969	4.7211	4.0079	4.26038	4.77252	6.23478	2.34838	3.91612	0.834849	2.61308	2.85528	3.34212	3.26016	8.99344	4.75826	2.64794	3.4384	1.88583	3.52239	0.0514313	3.16383	2.04981	2.02872
95	3.26973	2.27445	2.92819	1.73763	2.45612	2.98451	3.2401	5.38939	4.0159	4.77057	3.76981	4.93744	4.31539	3.89599	4.62817	95	1.00033	4.50644	3.54618	4.41176	5.46758	5.3252	5.4223	5.41657	5.51126	5.29512	4.32874	5.62497	5.40626	3.11103	3.02176	1.21888	2.68015	2.90142	3.62074	3.73137	8.91064	5.07912	5.0519	3.33181	0.896348	3.18506	1.46585	1.28048	2.1235	2.16289
96	3.17264	4.04256	3.16047	1.90939	0.931976	2.3644	6.32837	5.82793	3.41723	4.19018	4.56426	5.55969	4.42848	4.60167	4.48436	96	1.51459	3.29404	2.95433	5.20241	5.12368	4.8531	5.40791	4.34145	4.94574	5.5929	2.9817	5.54585	5.72141	3.31455	4.42427	0.56366	2.94038	2.2962	3.00894	4.45175	8.78448	3.93648	3.40292	2.04656	1.48097	2.6738	1.19158	3.57935	1.42638	2.39139
97	1.87745	2.57856	3.54365	1.48215	2.62405	3.84517	2.95412	6.91654	2.7433	5.63596	4.49834	4.95306	3.359	3.29009	4.4128	97	1.62346	4.95521	3.57061	5.5146	4.67428	5.46013	7.76633	4.92593	4.96472	4.28627	4.87453	4.62179	4.91454	1.62515	4.0731	0.737553	3.57457	2.0672	2.63518	3.78418	8.52684	4.57798	2.77716	2.09323	1.25815	4.26248	0.681693	2.86473	2.4573	2.19563
98	2.43683	3.09351	2.66209	2.44385	2.99654	3.12208	5.70222	4.95239	3.94305	3.94137	4.18746	6.77115	3.92273	3.02611	4.28255	98	2.38915	6.4282	2.79329	2.72688	4.8672	3.88691	6.22468	4.5685	4.17685	4.15052	2.40537	6.44071	6.24921	2.70237	3.49486	-0.219618	2.90783	2.5444	2.28938	3.84051	8.69703	4.70373	3.58533	2.26331	0.264081	3.09001	-0.339305	3.0521	2.84366	2.17598
99	2.97185	3.16782	3.49158	2.08971	2.93032	2.14731	3.90778	6.42121	4.91522	4.25169	4.18388	5.57777	4.72695	5.10537	4.82719	99	1.55617	4.43601	3.10904	5.13466	5.02337	5.43362	5.73707	5.52358	5.46974	4.778	2.96283	3.98385	3.2025	2.39531	4.73006	1.74896	3.01044	2.71526	2.45787	3.5832	8.17722	4.93327	3.19395	2.46466	1.21407	3.52132	1.10362	2.82286	2.19796	2.35146
100	3.00729	4.89199	3.23717	1.73272	2.84455	2.7784	4.57241	4.91813	4.072	3.17213	4.62508	5.83289	3.02375	4.65586	5.46335	100	1.86688	5.59743	3.80968	5.43812	4.66367	4.91389	5.42892	6.18582	4.59553	3.99	2.1101	3.62389	6.97276	2.05961	3.5817	1.34046	2.99853	2.69697	2.5247	3.16769	8.88147	3.92709	3.52317	3.01058	0.214943	3.15553	0.812987	2.0199	0.684263	1.73894
101	1.99865	3.63884	2.70673	3.22485	2.05034	2.64382	4.96048	5.5903	4.18689	4.02684	3.55855	5.47496	4.4617	4.34619	4.70542	101	1.21623	6.2612	1.8902	4.64285	5.4962	5.05506	5.49576	4.69896	3.35588	4.48141	4.17739	4.18092	4.25386	3.32931	3.1016	-0.314714	3.80071	3.40949	2.02968	4.1497	8.18722	4.15198	3.3832	3.24213	1.16814	3.71582	0.56606	2.57525	2.97693	1.14002
102	1.40986	4.12264	2.26739	2.36171	1.54016	2.24586	4.70685	4.39062	5.36435	4.92503	3.59573	4.82887	3.50836	4.38053	4.57597	102	1.62366	5.18098	3.08396	5.03748	5.45032	5.05536	5.70129	5.35746	4.33662	4.42964	4.31478	4.93749	6.94595	3.3063	3.55135	0.783934	3.09534	2.75161	2.4211	4.11989	8.74384	3.66408	3.23537	2.61985	1.16455	3.3622	0.540197	3.33481	2.7922	0.915097
103	1.08347	3.32046	3.03179	3.02538	2.63739	2.59544	4.54424	5.37625	3.13113	3.38825	4.03667	4.84277	4.17515	3.82092	6.21378	103	2.00097	5.58142	3.65194	4.69475	5.71442	3.95049	6.10925	4.98257	5.8661	4.10397	3.11722	5.62002	5.99601	2.79372	3.07181	2.01469	2.56024	2.34959	1.32754	4.52482	8.11641	3.14882	3.378	3.40214	1.24828	3.94869	0.376605	3.38416	0.815112	1.14747
104	2.1706	3.21548	2.76621	2.49064	2.08745	2.99264	5.77533	4.61498	3.39596	5.37033	3.12682	5.17818	4.64311	4.57905	4.69818	104	0.798842	5.83671	3.20148	5.92893	5.36494	3.13615	6.72304	5.14897	4.92257	4.93376	4.05851	6.32149	5.86385	2.29282	4.45559	0.183375	3.5921	2.37101	2.88288	3.4063	8.82621	4.85565	2.52054	3.32362	0.550882	4.226	0.938223	3.20004	1.37423	1.24403
105	0.345768	2.95226	2.62536	1.61283	3.61324	3.47762	5.42262	3.94791	4.34457	4.60007	1.40987	4.99934	4.20812	4.8437	3.99105	105	0.479983	6.31713	3.27358	4.49998	4.65698	4.69859	5.51705	5.03188	3.94701	4.61881	3.81044	4.57119	6.34995	3.77241	3.22201	1.59762	3.92594	2.98234	1.80241	3.82541	8.50745	5.0688	4.54663	2.26327	1.50148	3.53902	1.61785	3.43662	2.09231	1.78396
106	3.23788	4.75828	3.22802	2.72926	2.62459	2.94864	4.31332	6.67314	3.10292	4.67067	5.09332	4.52209	3.56175	4.84288	4.65647	106	2.14923	5.97338	2.15691	3.57339	4.21236	3.46892	7.42186	4.57801	4.26291	4.27632	3.44137	3.75538	5.55637	3.02186	2.94246	0.721109	4.94399	2.58092	2.51969	3.33615	9.64843	4.92993	4.38631	2.52771	1.72493	2.75301	0.641014	2.17654	2.68667	1.77533
107	2.38175	3.46658	2.13084	1.58975	2.92249	3.466	6.17954	6.03701	4.0627	5.15839	4.27404	4.57391	4.32918	4.53846	4.15968	107	2.0535	6.50011	3.67217	4.67132	5.8533	4.9886	5.46632	5.60395	4.76953	4.265	4.06489	4.95145	5.63595	3.06622	4.11578	0.801827	4.39957	2.04164	2.45888	3.84559	8.51555	2.85901	3.6972	3.25129	1.21887	2.17404	0.0158649	3.03396	2.35506	0.435975
108	0.855421	3.283	3.43114	3.08097	1.60489	2.40423	4.974	7.56861	3.5645	3.84546	2.67232	5.19008	3.88277	5.09541	5.24501	108	1.86685	5.98891	3.27544	4.18499	5.42847	3.79866	5.46886	6.159	3.90632	4.5791	3.44032	3.98177	3.69727	2.29007	3.47356	1.4256	3.187	1.65783	2.10508	3.85247	8.83747	4.99751	3.14904	2.24307	1.21381	3.5717	-0.0395169	2.05116	1.10986	1.04438
109	2.60964	2.66619	2.19525	2.4151	2.45425	3.30016	4.31503	5.40469	3.92806	3.50281	4.53386	4.22948	3.37491	5.14562	2.33449	109	2.02704	6.69306	3.4813	6.08642	6.24973	5.32975	6.08451	6.02562	4.40065	5.02748	2.82334	5.09107	4.82985	2.27988	3.81322	0.811718	4.14163	2.96944	1.99866	3.91612	9.06092	4.16472	3.03893	2.05174	2.35322	3.755	-0.179628	2.72365	2.61215	0.947735
110	2.70415	2.97762	2.73865	2.53005	3.26255	2.04032	5.27433	6.49059	5.67628	4.81428	3.15906	5.11775	3.88052	4.86425	5.04006	110	2.79597	7.09074	2.37991	4.66274	6.5495	4.49531	5.47951	5.37456	4.18041	4.13591	3.18127	3.6216	6.70121	2.37855	3.58606	0.799725	5.10864	1.85354	2.07374	2.9097	8.39272	3.00607	2.50271	2.83503	1.33871	2.94814	-0.344661	2.47703	2.01923	1.29057
111	2.97916	3.65614	3.97846	1.52774	1.71612	2.72442	3.84455	6.31152	2.56489	4.70907	3.49636	3.61103	3.95251	4.9433	4.39816	111	2.90077	7.68638	2.74873	5.12264	6.97627	5.90833	6.13449	5.17578	5.01619	5.25977	3.09309	3.80254	4.68251	2.30088	3.57232	1.30875	5.29594	2.69954	1.26871	3.315	8.80968	2.46647	3.61504	2.54433	1.67252	3.88959	-0.677634	2.1913	2.05713	0.914143
112	2.10011	4.08649	2.49461	2.24128	3.04492	2.64391	4.31643	5.08514	3.0184	5.05162	4.57127	5.51855	4.22183	4.642	3.48271	112	2.32979	7.61313	2.67657	4.22386	5.88281	4.0637	5.75958	5.41799	5.24632	5.98973	3.00761	4.18021	5.73306	4.09875	3.84663	1.01992	4.41805	3.23052	1.86642	4.08662	8.82409	4.0838	3.41205	2.82355	1.42488	2.92787	0.0596027	2.53103	2.35182	2.08914
113	2.82685	2.70615	3.21791	2.01866	2.91079	2.99698	4.48479	4.99673	3.87482	4.68606	2.99653	5.75509	3.84401	4.22989	5.08351	113	0.955098	7.41452	3.00107	5.332	6.62779	4.87315	5.88433	4.75118	4.60973	5.1336	3.48015	4.64279	5.72836	2.50632	4.06394	1.63505	4.08474	1.79146	1.67561	3.18603	8.35584	3.9989	4.27205	2.28292	1.34232	3.18272	-0.538928	3.07807	1.89997	1.27852
114	0.56016	4.02442	2.95416	1.71836	2.45429	2.91798	3.05824	6.59268	3.22034	3.97983	3.26243	5.41556	3.11303	4.53153	4.73646	114	2.17352	7.89422	4.58405	3.10023	7.44689	5.01244	5.50134	5.611	4.42653	4.51856	3.94219	4.18633	4.28405	2.86677	4.55014	2.06584	4.54006	3.90719	2.40954	3.66734	9.28283	3.19197	4.11415	2.90122	1.81392	2.68025	0.321911	3.1641	1.50045	1.22876
115	2.88379	3.17003	2.15731	1.83694	3.85995	2.35778	2.46386	5.96939	4.27253	3.73148	3.64585	4.69831	3.63379	3.89801	4.73082	115	2.08415	6.93444	4.01037	4.58137	5.19396	4.27658	5.73959	5.20974	4.42693	4.98885	3.88	4.29286	5.92811	2.90837	3.11491	2.3602	5.60847	1.40008	1.026	3.66564	8.47051	3.80901	1.98738	2.37775	0.992263	3.48095	0.102897	2.37259	3.01628	1.32318
116	3.03439	4.51799	2.63593	2.6198	3.34318	3.04538	4.45249	5.43701	5.14691	4.29473	4.27269	6.06449	4.1869	4.50242	4.2857	116	1.74947	7.61359	2.87234	3.38125	7.17861	4.88019	5.66049	5.06974	5.27263	5.96945	3.31388	4.49108	5.82577	3.73571	3.93172	2.54325	5.12881	3.31649	3.30812	2.61639	9.62306	3.18445	4.72888	3.49743	1.31164	2.74521	-0.211112	2.3691	1.59871	1.0959
117	1.70137	4.36961	3.78716	2.69821	1.69992	3.86016	3.68913	6.5168	2.63865	4.00752	5.91059	4.58844	4.93483	4.52366	4.2743	117	2.18455	6.52177	3.51495	4.6963	7.65053	4.65335	4.87551	5.27769	4.54464	5.15368	3.377	5.19065	3.93113	2.43162	3.6418	0.628568	3.25999	2.9027	1.85236	2.89591	9.06597	3.39427	3.69017	2.4789	0.716375	3.37094	0.0570622	2.38521	2.29162	2.7154
118	3.51692	2.78423	2.41747	1.97634	3.13097	3.29309	4.83203	5.86204	4.66949	4.73179	3.74267	3.46409	3.22669	3.51884	5.26037	118	2.05891	8.59544	4.24133	4.04538	7.92097	5.25135	5.0634	4.58471	4.89723	6.14075	4.41486	6.06325	4.25122	2.1803	3.98277	1.94556	4.15111	3.3599	2.00794	3.59402	9.33996	3.42679	4.61357	3.64779	1.32067	3.35793	-0.908962	2.04446	2.5368	2.23891
119	2.38721	2.49864	3.07523	1.75124	2.55636	2.31338	4.73892	5.1017	3.66717	5.16906	3.87509	5.00298	3.60402	3.96298	4.31888	119	1.76347	5.98251	3.29714	4.08432	7.01426	4.80917	5.66425	5.35122	4.70922	6.04464	4.29653	3.62303	3.78917	3.38051	3.36813	1.96281	4.39587	2.6881	3.26325	3.99543	8.71491	2.94233	4.71703	2.21307	0.672612	4.24914	-0.0927727	2.20697	2.45255	1.57791
120	3.15443	3.42926	2.58156	2.1988	1.78826	2.50755	4.11013	5.26022	3.12813	5.00676	4.47448	4.41575	4.03566	5.14618	3.72509	120	0.480443	6.97385	3.25009	3.59558	6.41848	5.91325	5.71329	5.40894	5.63973	3.69869	2.14476	4.10935	5.52262	2.57141	4.57464	1.72402	4.1688	4.16787	2.40245	4.15136	8.97073	3.99833	3.52984	1.72146	0.972895	2.92038	1.07119	3.13808	1.86669	2.25871
121	1.93447	2.59833	2.59614	2.35614	2.14804	2.88435	3.69079	5.8362	2.43229	3.02787	2.83732	6.13568	2.63275	4.38285	5.01697	121	1.99203	6.19801	3.8416	5.4865	5.7142	5.19278	4.76873	4.15434	3.66484	5.72405	3.13149	4.05338	6.2706	3.2077	4.63383	2.38431	1.9542	3.86166	2.01915	4.41682	8.22773	2.26578	4.29064	3.07181	1.86277	2.82347	-0.122297	2.67218	2.04518	1.34973
122	2.69132	3.63579	2.85229	2.5497	3.26694	2.42969	4.14488	5.32877	5.41064	4.34127	3.60908	5.30131	4.19866	3.32842	4.02068	122	1.70829	7.70644	3.21944	5.11112	6.22309	4.49747	4.39546	4.06079	2.64773	4.05503	2.94513	4.48248	5.60561	3.17408	4.34784	1.28871	3.17089	2.31888	1.55609	3.52542	8.07306	2.89795	3.6036	1.81248	0.472929	4.08657	-0.703478	1.93441	3.15199	2.02203
123	2.00764	2.08143	3.67684	2.54004	3.10638	3.45899	5.44012	6.074	2.91656	4.96838	4.55186	5.74957	2.47345	3.68235	4.61181	123	2.29476	6.88635	3.60387	4.29913	7.2088	5.21368	5.95665	5.41357	3.93213	4.86633	3.80771	4.5238	6.05737	2.08318	4.16815	2.94022	3.75025	3.42862	3.18772	3.42024	9.60476	4.01915	3.13265	2.63371	2.24059	3.77721	1.68848	3.20844	1.79578	1.86357
124	2.88887	1.77709	2.76086	0.565815	2.8111	3.41262	4.69074	5.4666	3.43779	4.72284	3.23587	5.92111	3.30393	4.01671	4.70788	124	1.64039	6.33641	2.73838	5.14325	6.38739	5.45445	4.59421	5.13525	5.7106	5.35208	3.47688	3.00544	6.05887	2.77038	3.62282	2.28495	3.30701	4.6234	2.22801	4.40482	8.40753	3.59112	4.18237	2.59794	2.02614	2.79899	1.1101	1.45171	2.49166	1.63282
125	2.91171	3.39853	2.36993	1.9445	2.98129	3.11466	3.45988	5.93554	3.90894	4.45362	2.87607	5.82523	4.42008	4.3914	5.16331	125	2.41801	6.28338	2.02067	5.71054	6.66521	4.93605	5.19465	4.96896	4.53721	4.35615	3.97777	5.92647	4.60674	3.28738	3.74384	2.97058	2.21143	4.21692	2.94427	4.28099	8.95958	4.04409	3.99901	2.24732	-0.354567	4.12015	-0.701048	1.7625	1.98651	2.0538
126	2.14101	4.11147	2.94684	1.615	2.87427	3.1829	3.92617	5.19286	4.36591	5.00885	4.23635	5.86984	3.92497	4.04886	5.10916	126	2.03436	6.52133	2.88025	4.68463	5.50388	4.27398	3.90267	5.12822	4.70934	4.83312	2.88952	4.26164	5.5005	3.52432	4.47103	2.51169	2.48962	4.65034	2.01691	3.9346	9.19821	3.12428	4.64343	1.89256	1.45819	3.5269	-0.463492	2.30622	1.68178	1.72776
127	2.67374	3.23733	3.48071	1.78573	2.89872	2.68861	5.82247	6.15109	4.30008	4.87053	3.59754	4.6716	3.70924	4.34113	4.92266	127	1.81369	6.63592	3.47879	3.90384	6.94441	4.33438	5.03073	5.53304	5.25105	5.1115	3.45661	4.63553	4.36068	2.95813	4.0737	2.12543	3.78231	4.91285	3.14184	2.84245	8.17272	3.05961	3.03631	3.03093	1.22889	2.50265	0.322223	2.2509	2.95434	1.58817
128	0.910192	4.55203	2.11139	1.8539	1.42673	3.08709	4.17465	3.90263	4.12341	5.17323	3.66156	5.90332	4.50412	4.87328	4.05419	128	1.46352	5.54188	2.88974	5.08928	6.21401	5.53583	6.15029	4.04807	4.0755	4.61006	3.1999	4.59758	5.5198	3.73398	4.29218	3.38628	4.30609	3.43009	2.27529	3.14159	9.35763	2.97792	2.98898	2.98715	1.40481	3.51205	0.261888	2.88135	2.3531	2.44037
129	2.71256	4.38889	2.61382	1.66176	3.00904	2.70031	4.07257	6.42008	4.95807	4.50432	4.39806	4.78786	2.28194	4.15753	4.9965	129	2.72539	6.80641	4.29183	4.48238	5.4643	4.32504	6.45773	4.61916	6.09657	4.96064	4.28074	5.10685	5.50824	3.25851	4.08745	2.50541	3.68617	4.58659	2.02821	3.20724	9.47615	4.41646	3.3822	2.08015	1.13092	3.91285	0.647458	2.37798	2.17949	0.813024
130	0.782969	3.64505	1.93131	2.17439	1.60621	2.56292	6.09352	5.53452	3.15381	4.26712	4.23039	4.73691	3.12367	4.01936	4.89917	130	1.97661	4.70736	3.77017	4.51602	4.8546	4.23182	5.1867	5.47813	5.46845	5.43136	2.30012	4.53104	6.33067	4.04102	4.97521	2.20172	2.55679	3.64759	2.50453	3.88941	9.30594	4.28072	3.671	2.90335	1.00547	3.27661	0.872359	2.24168	2.11724	1.51953
131	1.75559	2.78887	2.62982	1.99432	3.05413	2.18866	3.65094	5.76714	4.36973	4.45263	3.69329	5.30822	1.47474	4.01455	4.31038	131	2.37483	5.9512	3.51313	5.37952	5.33106	4.39464	4.86984	4.50641	4.07801	3.60132	4.62265	4.29507	4.81774	2.92155	4.84443	2.17399	2.70283	5.59296	1.45403	3.98742	8.70415	3.61982	3.82966	2.2021	0.522893	3.78603	-0.112297	2.4857	1.32187	2.043
132	3.07803	4.45152	3.10099	1.84321	3.46013	3.17983	5.54401	5.98471	4.75536	4.35941	4.7909	4.77289	3.75646	3.21347	3.94872	132	2.73095	5.50118	3.56248	5.77984	6.63191	5.00773	4.3934	4.27455	3.73012	4.98784	2.7529	2.77834	6.61332	2.24151	4.36415	1.95829	3.53507	4.10997	1.68026	3.6851	8.11047	3.82388	3.61038	2.58766	0.062414	3.804	-0.203984	2.15137	2.48409	2.10446
133	3.50691	3.42033	2.86072	2.46235	2.94658	3.5495	4.29987	6.03784	5.06052	4.79204	4.48573	5.26151	3.42607	4.23294	5.20326	133	2.76664	5.08455	3.93592	5.10142	6.58248	3.95711	5.41642	5.20254	4.09218	3.75087	3.0792	4.38024	5.9575	2.73991	3.56525	2.37291	3.64196	4.20006	2.78768	4.12435	9.11044	4.07658	3.81519	3.01135	0.984511	4.04207	-0.823221	2.12812	1.33793	2.46086
134	2.11788	4.46203	3.04865	1.98833	2.29909	2.92231	5.18643	5.11195	4.60097	4.39197	3.84639	4.82962	2.372	4.72426	4.37667	134	0.362071	5.63344	3.62112	5.31221	6.7324	3.49039	5.04601	5.08815	6.0947	4.11309	2.98589	5.59555	5.61079	3.09103	3.08848	3.39421	3.30668	3.50693	2.54441	3.40515	8.82358	3.4987	3.33221	1.58803	1.40808	2.1699	-1.03782	2.4504	2.14908	1.67296
135	1.99323	3.09685	3.19316	1.70892	2.96422	3.1178	5.11656	5.29106	4.26614	4.85046	3.51349	4.92849	3.87747	3.86518	4.58584	135	1.95047	5.04167	3.98722	6.02895	6.74909	4.11781	4.97877	5.10293	4.72957	5.1303	4.38239	4.8408	5.10664	2.84813	3.83458	2.78402	2.65819	5.64858	2.95202	3.84151	9.16104	3.22543	4.34931	1.89884	1.80293	2.48038	0.237695	2.32813	1.92099	0.991973
136	1.91861	4.19871	2.80513	1.47413	2.13455	2.6341	5.51157	4.88172	3.77341	4.71962	4.48503	4.41368	2.7467	3.51511	5.39153	136	1.24346	5.82362	3.80251	6.78792	6.89565	3.77643	5.04407	4.82726	4.15433	4.86184	3.19153	4.72195	5.19793	3.34135	4.31686	1.77844	2.30879	4.05182	1.89779	3.47309	8.35992	2.75572	4.2728	2.37809	2.45625	3.56016	0.76366	2.42845	2.29571	2.51821
137	2.43328	4.23536	2.46544	2.93239	2.57603	2.54249	3.66944	5.76137	5.22637	4.81025	2.43361	4.82959	3.19516	2.75141	4.66158	137	0.930898	5.41825	3.43948	6.07529	6.60456	4.64715	5.7044	4.91175	4.58852	5.05234	4.12198	4.45385	6.24099	3.4653	3.99327	1.49647	3.23682	3.32162	2.38161	3.4421	9.38029	3.34103	3.7419	1.90689	1.08862	3.70105	0.535316	2.72387	3.17994	0.894937
138	1.78326	3.96615	3.19106	3.07987	2.30251	3.12618	4.05964	5.19628	6.33881	6.82138	4.30056	5.81437	3.19706	4.91327	4.69452	138	2.02905	6.47635	3.45767	5.13849	6.44677	4.83226	5.1884	4.69189	4.19952	4.22457	2.84564	4.01725	5.7641	2.86544	3.71473	3.09788	4.59848	1.71787	1.83751	3.56212	8.8095	4.04203	2.91848	1.85503	0.385255	4.5562	0.235308	1.82393	2.79944	1.19325
139	0.526078	3.40163	1.85798	1.71238	3.38445	2.85267	3.86379	5.27685	3.70971	6.11658	2.96444	6.05594	3.33266	5.16609	3.86243	139	0.790618	4.87067	3.02685	5.97488	7.38926	4.68385	5.6837	5.28871	2.94441	5.20235	3.37748	4.49568	3.95962	3.57575	3.68996	1.53272	2.86468	2.73167	1.5518	3.22065	8.49341	4.7731	3.82429	3.11234	1.33811	3.31343	2.56631	2.51138	2.81006	1.52572
140	2.80243	3.64635	2.40626	3.34375	1.85929	3.36439	4.98297	4.76863	3.3822	5.31453	3.94894	4.91603	2.0279	4.32783	4.33026	140	0.315169	4.40938	3.26879	5.79554	6.82523	4.44581	5.45522	4.9339	4.06787	4.74324	3.54892	4.58832	5.62199	3.26815	3.6329	2.29425	3.40549	4.43861	2.29555	3.9113	8.58385	5.02203	4.08483	2.2185	0.334162	3.42813	-1.44038	1.96185	2.58551	0.569271
141	1.77294	2.45898	3.26177	2.29903	3.05897	3.57792	3.82836	4.70217	3.09712	4.81115	3.59656	4.68428	3.23821	2.42345	5.0987	141	1.4377	6.08167	4.04125	6.20593	6.07691	5.21986	4.16145	4.13351	5.03208	4.09017	3.74529	4.50979	5.37022	3.04294	4.19369	2.55307	2.92505	3.53135	3.45536	3.09197	8.04062	3.00413	3.17456	3.02735	0.126752	3.8351	0.527251	2.57821	1.80148	1.63528
142	1.50188	3.10005	3.03687	1.27827	3.02106	2.38416	5.86974	5.10073	3.4545	6.27568	4.03832	4.49681	4.00775	4.38649	4.3643	142	2.27297	4.56927	3.83483	5.30231	7.19337	4.20885	5.49403	5.04442	4.51248	4.48577	2.96174	5.48339	5.72733	2.65367	4.55605	2.39302	3.7324	3.38279	2.60819	3.07252	8.58118	3.62317	3.6902	1.91209	1.37595	2.55563	1.34891	1.14081	1.3677	1.58732
143	1.6125	2.80945	3.53281	1.73323	3.00406	2.54363	4.26067	6.17801	3.40303	5.68418	3.60714	6.14146	2.86481	3.53204	3.75566	143	2.00745	5.20165	4.77121	4.96671	5.96876	4.58771	5.71608	4.91655	5.69742	5.56161	3.70943	4.76191	3.13458	3.27714	3.71641	2.35127	2.90404	3.37522	2.41905	2.95158	8.37239	3.29868	2.30815	2.58486	1.42868	2.76761	0.39793	1.96881	2.74985	1.19087
144	1.99912	4.19403	2.62279	1.07191	2.01467	2.92796	2.10533	5.17307	3.96876	3.93499	4.66753	4.87551	3.00615	4.55709	4.63596	144	2.58182	6.05149	2.56504	6.13768	6.89929	5.23127	4.65567	4.45355	4.06354	5.26754	4.48084	1.84217	5.29555	2.68506	4.2521	1.09229	2.19334	2.72125	2.38386	2.86998	9.07145	3.54925	2.61946	2.17987	0.223668	2.22415	-0.426651	3.37666	1.51154	1.88153
145	2.20108	2.90988	2.71021	2.26423	2.24844	2.95965	4.33209	5.15646	4.81845	4.89071	3.4745	6.31286	3.01201	4.42451	4.61085	145	0.466749	6.20351	4.6964	6.37273	6.36018	4.53183	5.09949	3.56997	4.11206	4.8088	3.20538	3.278	5.60344	1.94423	3.31859	1.80849	2.91017	3.04047	2.65913	2.99527	9.43916	3.44051	3.19335	3.08175	1.47587	3.9172	-0.192086	1.81283	2.92584	1.77403
146	1.91819	2.56857	2.70838	1.90357	1.62851	3.29497	3.7372	5.48229	4.8688	4.08474	4.17502	5.62927	3.17995	3.85442	4.88732	146	2.05871	5.65847	3.35286	3.81688	6.30191	5.23428	5.00085	3.90069	5.00132	4.89787	2.55478	4.1847	5.94751	3.4393	3.307	1.21138	3.21976	3.46482	3.46047	2.71687	9.52424	4.00146	3.31494	2.03693	0.518772	2.98257	0.825108	3.46878	2.47338	1.63
147	3.12678	3.5137	2.55415	2.72484	2.65446	2.81813	4.85422	5.48079	3.745	5.25577	4.03511	5.11775	3.67763	3.34485	4.77305	147	2.06275	5.84201	3.90673	4.71994	6.90625	5.68033	4.66138	4.03232	4.65932	4.69959	4.05704	4.10247	3.49593	2.59894	3.01738	2.26987	3.05729	3.69158	2.35122	3.71504	8.76135	3.16669	3.00447	3.30524	1.52408	4.45985	0.244959	2.29847	2.7177	2.1215
148	1.12077	2.76746	2.74572	2.07091	3.11831	3.21463	4.9386	5.74091	3.84767	4.98174	4.37686	5.82146	2.86845	3.28355	5.21583	148	0.619411	4.72722	3.90481	4.33115	7.53872	4.9229	5.10414	4.76806	4.52553	4.39103	3.94026	3.89929	5.97419	2.84895	4.69588	1.56139	2.25458	3.02655	2.4508	3.62383	9.25751	3.51687	3.39489	3.4129	2.33331	3.92137	0.0613489	3.28751	2.89791	1.79374
149	2.43881	4.07833	3.35107	2.55081	1.10081	2.49648	2.76533	5.47108	3.80757	5.3694	3.13319	4.5805	1.1097	3.95392	4.39008	149	1.71825	5.49881	2.83538	5.37499	6.64231	6.21363	4.77243	4.65221	4.07743	4.66173	2.98437	3.83518	3.55072	2.13964	3.17205	0.619113	2.49467	2.21775	2.39738	3.5486	9.20968	4.51333	2.84048	2.52023	1.71294	3.65586	-0.782624	3.42288	1.71327	1.46595
150	1.69064	4.2221	3.00157	1.91029	2.24652	3.8714	4.54476	4.41846	3.54798	5.51181	4.44522	4.93293	4.00005	4.82767	3.6259	150	0.739767	6.9219	3.20603	5.59946	6.23885	4.8975	4.49426	3.67707	3.86931	4.50937	3.55257	4.93761	6.16649	2.30982	3.65841	2.33212	3.41759	2.49099	2.25404	3.04399	8.04042	4.39417	3.17326	2.64345	0.418831	2.79575	0.218953	2.28212	3.76661	1.98246
151	2.45913	3.52078	2.57088	2.54888	1.93577	3.15923	5.56678	5.80125	2.59397	3.88623	3.2871	5.40614	4.06458	3.4142	4.64005	151	0.426266	5.49664	2.85122	4.12868	7.09493	4.41567	3.88317	4.9121	3.58848	4.53154	3.65525	3.82951	4.69587	3.06423	3.96935	1.00928	3.62723	3.92915	1.17992	2.80233	8.77802	3.14896	3.39278	2.32985	1.9296	3.30694	-0.694496	2.26289	2.80919	1.74304
152	1.32899	2.47978	3.81305	0.578161	3.04673	3.99247	5.24653	4.03273	2.7237	5.63017	4.57217	5.80133	3.77204	3.4199	4.48163	152	0.144537	4.93841	4.29548	4.62132	6.68587	4.43175	4.4337	4.12039	2.5353	4.00917	3.12285	3.96038	5.26438	2.68951	3.63251	0.884816	2.2459	3.75898	2.82776	3.53058	8.34197	4.15093	3.12406	1.5956	1.06529	3.37613	-0.099749	2.28032	1.65296	0.721494
153	2.73426	3.97157	2.35646	2.36106	2.71896	3.11917	4.98971	5.46861	3.42268	4.28071	2.54044	4.32683	3.42315	3.40776	4.00825	153	1.23369	4.25647	2.71097	5.21686	6.97344	5.5842	4.71478	3.58642	3.77766	4.25203	3.28871	3.68936	4.67	3.22455	3.81172	2.04623	3.4513	4.10689	2.82895	3.03156	8.73362	2.87853	3.66623	3.02181	0.151612	4.91641	-0.207421	2.17672	1.16442	-0.0863589
154	0.809175	2.40003	3.69224	1.30106	2.73356	2.81573	3.71428	5.71125	3.79479	4.98665	4.41884	5.64242	2.89424	4.03055	3.85491	154	0.845006	4.878	3.0349	5.49373	5.62874	4.90529	5.17922	4.79608	4.538	4.83939	2.3843	3.22406	5.53758	1.90409	3.61839	1.29614	3.75929	3.4187	2.33665	2.53254	8.48886	4.77995	3.2756	2.11281	1.04557	2.79193	-0.331759	2.49374	2.26057	1.33882
155	2.28118	4.19781	3.50472	1.75992	1.52422	2.34168	3.89403	5.08407	3.92003	5.53976	4.37174	5.34262	2.05542	3.17124	2.50285	155	1.54992	4.92373	4.57796	5.11807	5.90585	4.73901	4.69693	3.99499	3.42588	5.50328	2.92771	3.10325	5.89963	4.26051	3.81131	2.58056	3.63162	3.30423	2.12931	2.81372	8.14544	2.64314	2.61788	2.62692	0.173012	2.77765	0.530856	1.50277	2.26275	1.8664
156	2.39751	4.41154	2.38913	2.00085	2.08058	1.11608	4.271	5.38112	2.30339	4.71403	-10.909	5.04355	3.50441	3.59482	4.22225	156	1.73701	4.7505	3.01107	4.7572	5.0324	3.69639	5.09704	3.82634	3.95425	3.88972	4.84307	5.09636	1.85338	3.20391	3.538	1.20841	2.95291	4.55018	1.54629	2.59441	8.28647	4.39443	3.34596	1.45039	0.466336	2.47425	-0.546351	3.06541	3.01737	1.07493
157	2.19381	2.17724	2.74105	3.3139	3.23804	2.21308	4.28303	5.11886	2.35402	5.2822	2.29796	5.66802	2.3258	3.12136	3.77513	157	0.86459	4.06486	3.81743	3.61147	5.90585	5.46635	4.21472	4.07089	4.48857	3.04805	3.44385	3.72473	5.20437	2.79133	3.83332	1.76732	3.03213	3.15798	2.21119	2.45865	8.01118	3.65067	2.32152	2.48987	1.51966	2.89461	-0.366276	2.84898	2.49303	0.0900163
158	1.65308	3.21603	2.34218	2.01674	2.30063	2.05587	4.70587	3.09275	2.19369	4.75901	2.81973	3.41618	2.10286	3.96238	3.24971	158	0.797683	4.42333	1.60522	4.24485	5.43531	4.92348	5.58447	5.09926	4.27487	4.01753	4.36689	4.70335	4.91139	3.2804	3.98797	2.28639	2.1479	3.034	2.31812	2.95038	7.14369	3.43153	2.47362	1.91823	1.40537	3.02654	-0.71024	2.01165	1.89428	1.50781
159	1.61139	3.0232	3.25189	1.46495	2.2446	2.69766	4.09544	3.58644	3.14588	3.93866	3.47563	5.52696	4.0003	3.12581	3.2864	159	2.38537	3.89737	3.65972	4.10752	5.89264	4.48712	3.91719	4.9862	4.43804	4.43129	3.46574	3.30581	4.83232	3.15146	2.5837	2.02859	2.85835	2.5731	2.83934	2.67569	8.44561	3.42304	3.7397	2.65832	0.772614	3.16846	1.53255	0.945136	0.646205	0.273727
160	1.79433	3.65164	2.59235	2.03616	2.72543	2.28889	4.73939	3.72539	3.14411	3.92816	4.15439	4.79409	4.34646	3.01619	2.96325	160	2.26324	4.95443	3.69902	3.74321	6.60635	5.95098	3.85695	2.85841	2.34476	4.87815	2.56658	4.15465	5.56524	3.19682	3.75803	0.710051	3.41592	3.10354	2.2851	2.6838	7.62809	4.66253	1.7666	1.80513	0.670262	3.51264	0.78098	2.44354	2.53068	0.85687
161	1.75901	3.3017	3.08267	1.7259	1.9496	2.92627	3.50819	5.09551	2.20229	3.53843	3.11841	4.57036	2.66196	3.55664	3.72021	161	1.64064	5.44736	1.6586	4.59772	7.00864	4.11698	4.80457	5.17625	4.3355	4.56089	3.19414	4.58583	5.29647	2.29641	3.76079	1.01373	2.14125	3.61643	2.19063	3.52843	7.95772	3.48716	2.48547	2.08433	0.852831	3.53043	-1.01428	1.69474	2.21872	1.11505
162	2.13915	3.46153	1.08406	2.43644	1.9095	2.9791	2.79328	3.97885	3.29366	4.41324	3.63866	2.51836	2.58336	2.93668	2.88123	162	2.26155	4.06995	2.51014	3.96747	5.55419	4.1959	4.65547	3.66164	3.26604	3.68652	2.97172	2.81252	4.92562	2.99794	3.90693	0.576271	0.933178	3.85774	1.71333	3.40283	8.99539	4.43593	2.57461	2.99354	0.95702	3.61764	-0.50545	2.18684	1.63425	0.757191
163	2.60397	3.26011	2.56107	1.43706	2.02348	3.1146	3.99436	3.82341	3.4223	4.20183	2.94188	4.0324	3.35484	3.71049	3.34013	163	2.42928	4.55135	2.69837	4.39865	4.15314	4.08061	4.555	3.40079	4.4415	4.22292	3.24498	4.98975	4.63237	3.70965	3.99126	2.58028	1.86581	4.12379	2.36571	3.40575	8.49656	3.89179	3.26072	2.31858	-0.0537334	3.17499	0.485231	2.5476	1.00717	0.844387
164	1.76287	2.96671	2.26237	1.82765	1.70541	2.27638	4.00505	4.65529	2.43866	3.77791	3.00858	3.35382	0.740987	2.77556	3.101	164	1.89487	4.77565	2.98543	5.07463	5.15383	4.96385	4.1979	4.52083	2.84317	5.22805	2.15929	3.75978	4.21588	3.02686	3.63947	1.90162	3.18715	3.96765	1.59084	2.66583	8.30109	1.57736	3.75458	1.78966	0.0444842	3.20149	-0.393396	2.39903	0.108223	0.250438
165	1.49139	3.44173	2.87182	1.19652	2.40802	2.59581	3.25512	4.45799	2.06472	5.62639	2.97981	5.1565	3.29987	3.03863	3.25747	165	0.235324	3.67073	2.25977	4.64921	4.67394	5.38765	4.20941	4.02413	4.44173	4.00058	2.29533	3.16238	3.58435	2.77577	3.75875	1.14572	2.76807	5.46303	2.47485	2.05604	6.28066	3.68143	2.73241	2.22717	-0.495048	3.01309	0.488771	3.01701	1.54111	1.31291
166	1.61749	3.51901	1.69581	1.43359	2.02329	2.56751	3.14388	3.12012	2.88279	3.41676	3.91993	3.87299	3.05169	3.0464	2.90303	166	1.65636	3.36114	2.18432	2.41287	5.71628	4.79517	3.91342	3.14621	3.37567	3.61959	2.66046	4.35512	4.43844	4.3197	3.96834	1.72242	1.37106	1.61951	1.50931	2.56397	6.30406	3.61713	3.6161	1.68803	0.679875	3.97104	0.558162	1.95994	1.76759	1.02364
167	1.61421	3.26558	1.56633	1.45054	-0.321832	2.66543	3.06133	4.33121	2.82923	4.69087	3.53759	4.43279	2.66985	3.31466	3.19828	167	1.20734	3.39606	2.57267	5.3531	6.09338	4.49029	4.62853	3.67583	2.24422	4.11762	3.24869	3.2871	4.95967	2.73738	2.53349	1.31581	2.14291	2.75031	1.45635	3.37672	7.64574	3.67959	2.43288	2.264	-0.0213962	3.12535	1.37501	2.13489	1.77011	0.567509
168	1.85879	3.21432	3.00864	1.67175	1.21977	2.34982	1.74302	3.90664	1.87269	3.5178	3.51856	4.61432	2.12876	2.99692	2.56854	168	2.63424	4.23155	3.43436	4.47066	5.12073	4.13234	3.81672	3.20925	3.36286	3.82818	2.44882	4.53853	4.19515	3.05222	3.53595	2.55273	2.31739	3.53921	0.974808	3.29122	7.59864	3.25173	2.06645	1.50038	-0.00580666	2.97072	0.166416	1.81759	1.65892	0.95151
169	1.20035	3.54031	2.24218	1.4706	0.936033	2.96577	3.6846	3.87317	3.41856	3.47826	2.17265	5.27905	3.18438	2.73509	2.69178	169	3.27778	4.35914	2.83768	3.24169	5.07944	4.15387	2.65069	3.93677	3.17504	4.69312	2.69731	3.12606	4.65932	4.11578	3.56778	1.02318	1.78581	3.37613	1.07052	3.16977	7.77362	3.71336	3.63793	1.95243	0.395001	2.30147	0.0735502	3.32915	1.01126	0.967654
170	2.27016	2.60016	2.97448	1.00246	1.36334	1.61079	2.88855	4.18729	3.23281	4.4236	3.13922	4.41093	0.915412	3.12052	2.23038	170	2.24328	3.78224	2.24922	4.03012	5.30304	5.12054	3.19595	4.57507	4.48803	3.97668	3.91377	2.87659	5.08249	3.80945	2.88788	2.0986	2.26913	4.42225	1.49451	3.48285	6.98975	3.01705	2.815	1.36188	0.0413368	4.4158	-0.0479254	1.05821	0.892061	-0.766024
171	1.973	1.19965	2.22082	0.922278	1.29668	1.72641	2.79936	4.81437	3.01264	4.88905	3.49569	4.41658	2.16569	2.41229	3.29347	171	-0.208493	3.25801	3.4029	2.61071	5.31097	4.81511	4.16267	3.11411	3.45034	3.35295	3.61549	2.44662	4.99039	3.58234	3.33086	1.69169	2.18704	2.81899	1.47337	3.26109	7.49367	3.3485	3.30066	1.63189	0.539474	2.87542	-0.980139	2.12341	1.65331	1.34495
172	2.23125	2.14228	3.01556	0.973144	0.491642	2.56491	3.59887	3.93775	3.94882	3.65766	2.95966	4.61096	1.27148	1.31992	3.85368	172	1.5912	4.88624	1.17481	4.06483	5.78122	4.54659	4.49934	3.3003	1.7801	4.15962	3.19892	4.32576	5.51248	2.89816	3.01759	1.10306	1.66769	2.58182	1.85812	2.66287	7.18985	2.66425	4.22546	2.04809	0.712492	2.53061	0.0678983	2.55587	1.81701	0.603287
173	1.7207	2.41879	2.12361	1.03587	1.40096	3.02922	2.97791	4.15244	2.74385	2.72497	1.38435	4.61096	2.14912	2.51506	2.21848	173	1.52344	4.08199	2.90776	4.15509	4.35545	4.61335	3.93471	3.85604	3.51608	4.18042	4.3687	4.19118	5.32079	3.01985	2.35431	2.20653	1.57989	4.45323	1.14298	2.82557	7.07653	2.72327	2.95882	1.19463	0.26841	2.64814	0.469748	2.5662	1.26744	0.325404
174	1.94858	2.34877	1.82713	1.65716	2.27835	1.09985	2.80691	3.48994	3.36722	3.08495	3.03776	4.85489	2.23045	2.45805	3.46337	174	1.79327	3.6012	3.01886	3.77562	6.0809	5.22946	4.41963	3.83659	4.84719	4.6083	2.52506	4.34629	4.2675	4.09575	3.13901	0.769893	1.12227	2.74365	2.92187	3.64719	7.30544	3.36006	4.04945	2.10155	-0.285924	2.93284	-0.526503	2.68223	1.25517	0.66021
175	2.18907	2.6838	2.02389	0.65111	1.39141	2.48948	2.79946	3.13908	2.06674	4.07014	3.1946	2.78375	1.32314	2.86945	2.82123	175	3.44561	3.40247	3.63297	3.16048	4.57313	3.6658	3.45447	4.35889	2.61029	3.63061	3.2088	4.0378	4.90233	2.8873	2.56141	1.4409	1.85261	2.62888	2.20556	2.83736	6.80795	3.67119	3.48983	2.35165	0.633125	3.38096	-0.618326	2.34205	1.39536	1.45156
176	3.22132	2.10226	2.01192	0.771548	1.85715	1.833	2.11967	2.97508	2.44185	3.56138	2.73357	2.91844	2.12087	2.88594	1.54869	176	2.2789	3.47502	2.41562	3.58561	4.00697	3.51423	4.88357	3.35534	4.06696	4.04119	3.33858	3.08302	5.3789	3.45411	3.09318	0.267259	0.915032	3.40626	0.940444	3.26342	7.0694	3.33596	3.02419	2.01247	1.3125	3.36735	-0.537601	1.07878	1.83151	0.768335
177	2.00873	2.36723	1.50711	1.68945	1.71599	2.88407	3.27648	3.32421	4.19844	4.09422	2.59587	4.48759	2.86911	1.74788	2.2841	177	1.01242	4.25303	3.23506	3.03754	4.83715	4.31961	3.23558	3.44282	3.61317	3.36785	3.45345	4.33271	5.0304	3.05398	1.85308	1.83529	2.34045	2.08834	1.67799	3.56323	6.51888	3.26439	2.75438	1.41422	0.945841	3.20489	0.692693	2.83728	1.83656	0.403962
178	2.54228	2.41074	1.36706	1.08701	1.17564	2.09677	3.36577	2.20312	3.19006	3.16939	3.11072	3.84326	1.1829	1.61781	1.82319	178	0.598059	2.82389	1.67027	3.33804	6.14457	4.46722	4.07212	4.474	3.04505	4.12253	2.52678	3.83133	4.80461	2.2078	2.37117	2.0623	1.65629	2.42836	1.95833	2.39754	6.42185	1.96704	2.99244	3.21073	0.533977	3.07067	-0.776298	1.95831	2.07037	0.306283
179	1.98464	0.94144	2.57817	1.6305	-0.272832	2.11793	1.75676	3.08107	2.18734	2.92092	2.44803	2.04469	2.83201	2.45881	1.93187	179	1.57952	3.89519	2.07999	4.44985	5.12646	4.30618	3.06425	3.52723	3.70762	3.31284	3.28292	3.21425	4.68452	3.23552	3.17013	1.61301	0.959249	3.2445	1.25199	3.11457	5.9875	3.32378	2.52284	1.49921	0.534338	3.42582	0.3845	1.88486	1.5047	-0.0527465
180	2.60351	2.29526	1.91153	1.01924	2.20996	2.40628	3.0934	2.71085	1.3531	3.35683	1.01959	4.48245	2.21991	1.73984	2.83617	180	1.22451	4.31463	2.25165	3.90912	3.44718	4.02736	4.14058	3.33422	3.21802	3.98343	2.93394	4.03207	5.03784	2.82632	3.32566	1.74475	2.46012	1.88427	2.22496	3.44895	6.20347	3.49618	2.09283	1.66525	0.783879	3.39199	0.672568	0.84604	0.417723	0.436433
181	1.68431	2.74706	2.39345	1.40983	2.11116	1.94605	1.96076	2.94509	2.6353	2.39047	3.13586	3.56428	1.99951	1.51759	1.7298	181	1.02347	4.2501	3.03057	3.28361	4.48277	3.77242	4.70931	4.25416	3.99824	3.24001	1.99091	3.92558	5.55072	4.00247	2.59299	2.34411	2.23538	2.02774	2.04526	1.65636	7.18159	3.45893	3.06256	1.78668	0.0891449	2.88246	0.294131	2.0539	1.56888	1.05574
182	1.56351	0.692484	2.7875	1.60093	2.57406	3.14339	2.75785	4.67355	1.67426	2.61677	3.25923	3.94388	1.62697	3.49689	2.10485	182	-0.111196	4.11009	3.30784	3.2807	3.93195	3.56101	3.87301	3.94852	3.06152	4.21177	2.90752	4.12074	4.98711	3.45514	2.7394	2.41712	2.60717	2.95402	1.63646	2.44067	7.23164	2.53728	2.26345	2.05467	-0.0561877	3.98379	-0.651321	2.44881	1.69597	0.0114868
183	1.89117	4.36106	1.40272	0.843241	1.5906	2.77285	2.33554	1.93417	2.35629	4.37639	3.23427	3.09359	1.49516	1.9548	2.05976	183	1.46499	3.53871	2.4879	3.42193	4.57895	4.14197	4.17883	4.56683	2.56608	2.99109	2.52486	4.23658	4.2154	2.81491	3.0733	1.77062	2.83436	2.93277	0.696688	2.97497	6.9728	2.74231	2.71594	2.13255	1.92354	2.90697	-1.29206	2.75162	1.74017	-0.128682
184	1.28064	3.70386	1.43468	0.860243	1.54543	1.1427	2.43633	4.21533	2.99856	4.0492	1.72765	3.38965	2.24006	2.96464	2.11032	184	1.73088	3.986	3.5701	2.67494	4.47673	3.49081	3.24608	4.50372	3.63156	3.1774	2.24881	4.73264	4.30006	3.08034	4.1145	1.48045	2.35995	3.6947	1.38536	2.68152	6.99848	1.71696	2.72604	2.63075	-0.567532	3.14567	0.475718	2.46207	1.24966	1.10922
185	2.03351	2.50563	2.36684	1.35668	2.03007	1.59205	2.49497	4.34743	1.91733	1.80614	0.728387	3.94401	1.78252	3.03364	2.67994	185	1.18683	4.91424	3.32926	3.69652	4.9985	3.62322	3.3768	4.24073	3.35079	4.2036	3.16819	3.64345	5.34763	2.26141	2.74482	2.96787	2.48121	2.7481	1.92903	2.95128	6.2864	1.70731	2.47758	3.01295	0.0814404	3.33352	1.21833	2.17424	2.17085	0.913957
186	2.94371	2.38931	1.85113	0.593377	1.48206	1.31254	1.72264	3.53363	1.68099	1.52888	3.069	3.75788	1.95167	2.51001	2.02229	186	0.913971	4.40521	2.31887	2.89638	3.91957	3.8787	4.34274	3.32361	1.95648	3.34343	2.30353	3.14021	5.52778	3.24741	2.71797	2.42023	1.33735	2.46237	2.30473	3.40116	6.99251	3.52322	2.94089	1.77851	0.259163	3.55055	0.086248	1.33399	0.17893	1.61514
187	0.744445	2.31407	2.19669	1.73641	1.25648	0.848836	2.54681	3.36694	1.87426	2.70561	2.83073	4.08196	3.59284	1.45761	0.994005	187	0.292447	2.88446	3.34891	3.63043	4.81189	4.38224	3.36517	4.31554	4.92923	3.68722	2.98844	3.45493	5.3169	2.65106	2.91595	1.94851	1.61874	1.93509	1.70489	3.43691	5.87506	3.02944	2.81796	2.71844	0.765968	3.0081	-0.453	1.97496	1.17095	0.346799
188	0.784577	2.46777	2.09476	0.609013	2.47594	2.33541	2.62014	4.0568	0.654597	4.04674	1.49192	4.35421	1.83388	1.49426	2.03263	188	1.43734	3.12975	3.00803	3.40547	5.00696	3.24207	3.89344	4.12175	2.91273	4.19212	2.48447	3.24808	5.33246	2.97583	2.7763	0.292392	2.59804	1.56152	1.52786	3.4399	5.53506	2.93837	1.76152	1.13155	1.41713	3.10926	-0.272606	2.26565	0.900449	0.138193
189	1.76806	2.35264	2.07537	0.767562	1.87782	1.52987	2.50647	5.09469	1.32094	3.0836	2.90204	2.76364	1.66267	1.84081	1.70125	189	2.3838	5.18705	2.46293	3.36061	3.70731	4.7188	2.70465	4.49133	3.11555	2.81817	2.94857	4.54991	4.5909	2.38924	3.46993	2.35077	3.00838	2.3535	1.26938	2.65214	5.6748	2.38717	2.47477	1.65059	-0.201658	1.98192	-0.494681	1.90787	1.7569	0.4055
190	1.7282	2.68643	1.91591	0.420432	1.47951	0.435592	2.8677	3.7539	2.74159	2.37034	2.3548	2.85337	2.2385	2.5395	1.3867	190	1.52988	3.77276	2.26807	3.67245	5.76044	3.91962	3.89705	2.94952	4.16542	3.39461	3.77775	2.49422	4.27432	2.59308	2.73312	1.12894	0.519986	2.16774	2.19057	2.70723	5.96852	3.33572	1.98469	2.02506	0.254705	2.31996	0.921827	2.52349	0.845841	1.30129
191	1.98141	1.18859	1.8142	1.53852	1.2187	1.78905	2.79064	3.13977	1.31565	3.36849	2.2677	2.86723	1.57535	1.33086	1.05882	191	1.67505	4.55831	2.05085	4.03123	4.29811	4.17498	3.64373	3.162	3.35123	3.48345	2.38256	2.97721	4.81914	2.52541	1.82054	1.8986	1.0173	1.95922	2.57918	2.90147	4.68667	3.54665	1.98969	1.84874	0.839829	2.86468	0.770252	1.63575	0.976833	0.845664
192	1.29048	2.08204	1.46763	0.670465	0.668983	2.13578	1.66572	4.15842	2.47641	2.17394	2.44083	3.65991	1.34403	2.34745	1.25952	192	1.80133	4.45092	2.28223	3.89257	4.04284	3.18668	4.33022	3.61378	2.81695	3.93631	2.52189	4.40775	4.49736	2.25998	2.80966	1.99431	2.16661	1.41354	1.9989	2.31875	5.52644	2.21822	2.90668	2.35697	1.0687	2.94783	-0.0920094	1.98141	1.85795	0.390348
193	0.910343	1.24592	2.66066	0.82692	1.50773	0.48345	2.29252	4.05289	0.741947	2.94603	2.02216	3.44158	1.11011	1.07821	2.77824	193	1.59251	4.77604	3.44998	3.14504	5.47741	3.02528	4.1071	3.60382	1.93138	3.01433	2.58742	3.61233	4.96206	3.01222	2.79546	1.42803	0.845438	1.90467	1.8707	1.98361	6.15588	2.51131	2.52042	2.21245	0.52453	2.93066	-0.0729734	1.12376	0.397599	1.04855
194	1.21637	2.68105	1.96245	1.30918	1.93896	1.24398	1.57415	4.00048	1.53646	3.31405	2.21733	3.72791	1.21374	1.79234	1.57633	194	1.47748	4.14003	3.79887	3.28635	5.22819	3.9893	4.09994	4.41128	4.14238	3.19712	1.18593	4.1054	4.27438	2.54798	2.91988	1.55737	1.84337	2.84206	1.44328	2.49453	5.42177	1.59444	2.30486	2.01105	1.72514	3.0679	0.0268872	1.11615	1.19604	1.08006
195	1.9917	2.82096	1.82592	0.526313	0.430209	2.10572	2.4219	3.57152	3.43039	2.64527	1.255	3.35787	1.74089	0.231689	2.08406	195	1.55852	4.41752	1.39544	2.62309	3.80893	2.79355	3.59274	3.31835	2.9821	2.44743	1.83636	3.34872	5.12048	2.90565	2.5201	1.61291	1.75809	2.89436	1.56152	3.40513	5.81209	2.98101	2.63203	3.38821	-0.230838	3.0693	0.910421	2.67333	1.708	-0.303271
196	1.54065	2.52965	1.25582	0.433771	1.84614	0.135898	2.10399	3.56689	0.697335	2.69905	2.17642	2.95351	1.7085	1.1416	2.43413	196	2.04069	3.10912	3.43999	2.17215	4.46685	4.23358	4.16106	4.20716	2.14274	3.31105	1.54901	3.59017	4.83206	2.5931	3.71568	1.1721	1.93819	2.44418	0.156627	2.75854	5.70753	2.61496	2.72178	1.74827	-0.281651	2.35985	0.301798	2.16814	1.95265	1.69019
197	1.46291	2.04525	2.35141	1.39123	0.935185	1.18758	0.8175	2.75585	2.05777	2.36012	1.88781	3.72728	0.644046	0.274346	1.72688	197	2.30888	3.78821	2.69186	2.84834	3.93493	2.93453	3.97294	3.92344	3.01993	4.63146	2.21979	2.98677	3.8952	2.57453	2.42245	1.8324	3.25001	1.03184	1.73519	2.86343	5.49733	3.64227	1.90132	2.42262	-0.297089	2.67451	-0.167981	1.54236	1.58699	0.481214
198	1.42222	1.79645	2.2852	1.5274	1.91159	1.63269	1.81786	2.03263	2.50474	2.58252	1.43859	2.97041	1.53528	1.59687	1.67593	198	1.45681	5.47026	2.32343	3.68597	4.56814	3.37786	4.25211	4.08707	3.40726	3.10502	2.52527	3.60528	4.8495	2.70843	2.23598	1.44869	2.03176	2.45274	2.01125	1.50206	4.61251	2.40716	1.51149	1.69617	-1.30294	3.05863	0.49841	2.31094	2.2343	0.016461
199	2.18373	2.12886	0.85843	0.645491	1.58531	1.66707	2.38507	3.98466	2.48036	1.80355	1.55864	3.38469	2.60606	1.73309	2.06623	199	0.401563	3.95448	2.6409	3.07643	3.54202	3.08387	3.99373	3.11961	2.71537	3.52869	3.03772	4.36939	4.3156	3.46653	3.01655	1.71337	3.42113	2.12487	1.27827	2.93205	6.41118	2.86349	2.70752	2.39536	0.558994	3.41896	0.0558	1.37781	2.18317	0.58544
200	2.12489	2.50354	1.32271	0.687676	1.14952	0.304317	-0.936029	3.35496	2.58171	2.5297	1.26285	3.20218	1.7963	-0.110796	2.26091	200	2.26781	4.31136	3.39498	3.24562	4.81567	3.53869	3.85321	2.69381	2.27431	3.50545	3.84763	3.04126	4.90892	2.37263	1.97153	1.56728	1.45484	2.14928	1.46877	2.09586	4.83649	2.0052	2.03426	0.809743	0.312154	2.33123	-0.803941	1.99647	2.31613	0.304098
201	0.876551	0.931085	1.68918	1.26828	2.04146	0.744785	1.99666	3.29694	1.98306	2.80261	2.03722	2.70827	1.51759	2.32853	2.64782	201	1.08025	3.30203	2.40716	2.49304	3.93214	3.2694	4.59746	3.35894	2.37813	2.95595	2.2925	3.01441	3.35948	3.10432	3.33699	0.833033	2.83777	3.55806	1.86686	2.71627	5.68861	2.25648	3.0689	2.26924	0.422591	2.86029	-0.399079	1.43582	1.12446	-0.605502
202	1.32862	1.65628	1.07664	0.959492	-0.401912	1.30234	1.81528	2.8357	1.44767	1.97144	1.44874	3.19958	1.09871	0.905512	0.0962159	202	1.67613	3.63296	2.77415	2.51598	3.70357	2.59935	4.1712	3.47823	2.36792	3.44329	2.31354	2.73228	5.44424	2.31155	1.72148	2.27619	1.94798	3.08109	0.524376	2.48365	5.15057	2.43215	3.37364	1.92184	-0.14389	2.39071	-0.135075	1.83723	1.81032	0.90311
203	1.12479	2.57376	2.45066	1.10021	1.78177	1.80367	2.06586	3.04709	2.20781	1.14749	1.76228	3.00215	2.34653	1.69413	1.68716	203	1.31362	0.939739	2.45597	2.35265	3.66501	3.98378	3.43101	3.13749	3.31753	3.07703	2.35724	3.38406	5.4981	2.48671	2.73084	2.00266	2.40218	2.8752	1.33646	2.23472	5.89605	2.73544	3.42228	0.975158	0.766856	3.38879	0.643849	1.79833	1.13546	0.264792
204	1.07886	1.95138	2.02825	0.781069	0.870425	2.44719	1.99397	4.88667	1.69618	2.3942	1.83791	3.10134	1.90546	1.30029	1.34779	204	1.39396	3.70537	2.5339	3.32751	4.16011	3.6976	3.11895	3.46869	2.5243	3.13073	1.84293	3.49638	4.89541	2.69687	2.72333	0.608333	1.62497	2.35899	1.25255	2.65275	5.90555	2.39573	2.56314	1.69081	-0.135706	2.85207	-0.129153	1.55106	1.12163	0.791519
205	1.97571	1.14524	1.35894	-0.0161545	1.17529	1.90485	2.79851	3.96197	1.87272	0.723854	1.23119	2.55228	0.880668	1.74925	1.56723	205	1.46762	3.39967	3.00875	3.03159	5.11758	3.85284	3.52437	3.5306	2.04705	2.7012	2.51447	2.14714	4.27176	2.8894	2.74778	1.65278	1.71358	1.94891	2.23996	2.20866	5.21556	3.71149	2.92869	1.52283	-0.150247	3.05325	0.701503	2.48474	1.23119	0.728124
206	1.04216	1.74694	1.25384	0.588535	1.56023	1.64405	1.25313	3.57081	2.61175	1.61231	2.90893	2.93299	1.57669	0.424003	1.30922	206	1.10651	3.40525	2.58259	4.1399	4.76958	3.31208	5.2915	2.67776	3.11664	3.54024	3.3097	2.00394	5.11994	2.51915	2.02677	1.66701	2.42507	2.11409	1.32245	2.22017	5.55916	2.50418	2.10938	2.141	1.08802	3.12528	-0.458919	2.87159	1.81161	1.04505
207	1.62594	2.1319	0.871823	1.13678	1.20863	1.62807	2.48776	2.79552	3.45216	2.59613	0.970006	3.28145	2.16259	1.87482	1.86466	207	1.30512	3.99003	1.97643	2.89598	3.97044	3.7927	3.36741	3.77342	2.2657	2.04925	1.33345	2.73051	4.85574	2.4926	2.76154	1.60479	2.77379	1.96352	1.36638	2.74544	5.20217	2.45024	1.24982	1.468	-0.312982	2.57535	0.161089	2.45011	0.910996	1.5518
208	1.10593	2.60835	1.35079	0.370776	1.45972	1.06916	2.30434	3.14445	0.462129	3.04117	1.76258	2.81985	1.59871	1.33632	0.95647	208	2.40158	4.52411	2.95973	3.03905	4.18631	2.49084	4.67699	3.067	1.42872	4.47142	2.17663	3.07398	5.04391	2.47564	1.58043	1.01834	2.97626	3.48073	1.141	2.40624	4.59823	2.76887	2.26373	1.44874	-0.0568475	2.28692	-0.645575	2.13774	1.06622	1.44359
209	0.112194	2.15903	1.9022	1.63401	1.4283	1.76427	1.27477	3.872	1.81893	2.14972	1.02063	3.08595	0.0670421	1.75887	0.841543	209	2.65942	3.70542	3.33238	2.21267	3.26934	2.75982	4.14732	2.4875	1.43987	2.19778	1.87876	3.63543	4.38656	2.08029	2.2362	1.61175	3.05013	1.91231	1.98303	2.24545	5.00568	3.03024	2.73309	2.37176	0.157679	2.96015	-0.554394	2.22493	1.04593	-0.176914
210	1.48149	1.06891	1.73812	0.961601	2.22817	2.53773	1.61058	3.72544	0.90477	1.61824	0.422959	2.33963	0.132615	0.6694	0.930653	210	1.01856	3.98516	3.40828	3.12759	3.38437	2.66274	3.24106	3.16995	3.03276	2.70421	2.85387	2.39929	5.0911	2.43835	2.06927	2.2584	2.69338	2.18269	0.798789	2.3635	5.21223	2.28888	1.57541	0.811851	-0.147954	3.52494	-0.439757	2.03014	1.66756	-0.300538
211	1.48992	2.66282	2.03054	0.956507	1.31336	1.73311	1.58516	2.882	0.474947	0.989375	0.317203	3.22189	2.10228	2.4587	1.36101	211	1.17388	3.78829	1.82813	3.45223	3.67054	2.18802	3.72642	3.19326	1.74098	2.8863	2.10806	3.29016	3.53871	1.30511	1.92776	1.73259	1.57549	2.68606	1.64833	3.29464	4.99634	3.35291	1.73022	1.51502	0.392276	2.0293	-2.03962	1.10209	0.080415	0.590193
212	1.87123	2.61221	1.75709	0.728867	1.56595	1.63085	2.30704	2.37743	0.441752	2.53801	1.67336	2.49105	-0.203964	0.835409	1.57861	212	2.04612	3.61687	1.82071	2.67742	3.78441	3.27561	2.55396	3.915	2.50869	3.26784	3.47624	3.82372	4.23381	2.60075	1.52604	1.20726	1.2466	1.66651	1.33216	3.24663	5.03759	2.51674	2.3731	1.02302	0.298483	1.62837	-0.725708	2.06628	1.21874	1.2374
213	2.03011	1.95134	1.99474	0.423308	0.30944	1.0562	1.10071	2.48377	1.59459	1.73888	1.567	2.65783	1.36682	1.55175	1.49726	213	1.9963	3.32836	3.08166	2.18691	3.42018	2.60152	3.98229	3.5842	2.70798	2.71709	3.1498	3.1532	4.83994	1.83701	2.43342	1.29404	2.57067	1.79891	0.762519	1.86332	4.45686	1.51726	2.5438	1.77056	1.08233	2.56406	0.13099	2.22363	1.67053	0.891683
214	-0.0136973	1.73345	1.88223	0.851136	1.20349	1.10267	1.50537	3.35405	1.41443	2.01041	1.59595	0.974886	1.64358	1.94889	1.03161	214	1.92995	4.60082	2.11219	2.09146	3.31348	3.16218	2.63855	2.50974	2.79239	2.10769	1.22831	2.55331	5.33859	1.80537	2.37214	0.187816	2.39165	2.09731	1.03655	2.85434	5.14623	1.34392	3.18453	1.06786	-0.650957	2.49627	0.275397	1.7505	0.733163	0.543179
215	1.88666	3.04785	2.7818	0.190467	1.74475	2.01164	1.03323	2.28886	0.277359	2.78558	1.53895	3.19164	-0.4836	0.604022	1.34573	215	0.785177	3.50088	2.83479	3.46243	3.34487	3.47947	4.41051	3.28258	1.77871	2.99991	2.85503	3.17104	4.20832	1.43178	2.37383	1.69769	2.69909	2.66433	1.00939	2.64539	4.65129	2.74217	2.48024	1.69978	-0.449756	2.51652	-0.314514	0.30704	1.23591	1.00903
216	0.707492	1.30841	1.48815	1.05966	0.827302	1.0804	2.97345	3.12659	0.182214	2.36762	0.0852056	1.21435	2.02756	0.942471	1.42131	216	1.14231	4.68764	2.96155	2.60421	3.54494	3.67011	4.23933	3.27995	3.41408	2.74552	2.64397	2.31074	5.8649	3.02112	2.41516	1.13292	1.68197	1.83122	1.48502	2.02189	4.50628	2.33788	2.6941	1.71939	-0.135996	2.8671	-0.641371	2.11148	2.26175	0.510735
217	1.93586	2.18882	1.5245	0.356597	0.251134	0.773365	1.32056	2.14766	1.72254	1.62352	1.43551	1.63493	2.2707	1.53225	0.357791	217	2.03071	4.77515	3.31785	2.87995	4.64156	3.10007	3.81843	3.71965	2.76821	2.6617	1.30301	3.29221	4.71502	2.03579	1.62797	1.45153	0.0319761	2.2717	1.05533	2.13562	4.14165	2.60249	2.59232	2.08991	-0.41955	2.36189	-0.27814	1.94666	1.70248	0.181338
218	1.05132	1.75036	1.23016	-0.115432	0.189079	2.0808	1.24163	2.67858	2.01823	1.27292	1.8835	2.75115	1.38493	1.26776	1.09124	218	1.2422	3.14542	3.61207	3.32919	4.00942	3.8992	3.73219	2.92584	3.80486	2.65944	2.34642	3.65136	4.32167	3.39817	2.43132	1.5183	1.33272	3.42186	1.57423	2.65342	4.44664	3.13927	1.78609	2.04145	0.872265	1.53945	0.609178	1.92113	0.343733	0.477774
219	1.23828	2.40835	0.478081	0.738497	0.886961	1.67011	0.635382	1.76418	3.17175	2.49249	2.14042	3.75936	1.80721	0.75017	1.02968	219	1.76306	4.16948	3.45565	3.37354	3.89918	2.7597	3.36942	2.92745	2.62762	3.38869	3.59671	3.34055	3.33632	2.41746	1.97634	1.69868	1.85321	1.95942	1.06747	2.39501	4.92792	2.55138	2.30875	1.1398	0.910005	3.36481	-0.341972	1.65806	0.555286	0.390085
220	1.78699	2.37658	1.63812	0.900386	1.95477	2.0355	2.29386	2.46523	2.29853	1.55128	1.60224	3.13996	-0.222696	1.17246	0.411548	220	0.229418	3.78875	1.13162	3.08695	4.11933	2.24512	3.55619	4.2659	2.46543	3.25393	3.14013	2.35716	4.65237	3.03835	2.39929	1.98622	1.91858	1.77703	1.36589	2.24991	3.38947	2.53876	2.79778	1.28534	0.153777	1.86848	-0.0270934	0.961587	0.799415	-0.0390061
221	1.61207	1.8087	1.23607	0.330591	0.803582	2.10072	2.60736	2.88534	1.71233	2.10225	2.61926	2.66369	1.05741	1.92656	1.63351	221	1.25752	3.932	3.11182	2.51945	4.26504	3.25939	3.50903	3.28825	2.46979	2.64319	2.18051	2.62937	4.44225	2.75945	2.3799	1.58386	1.43041	2.04529	2.43422	2.70815	4.31625	2.54182	3.37664	1.43897	-1.42399	1.41388	1.51038	1.79431	-0.21688	0.501344
222	2.33346	1.32365	1.42335	0.774155	1.40535	2.36649	0.870549	2.59743	2.08469	2.06651	1.97865	3.73206	0.894452	2.28209	1.06956	222	1.39421	4.53732	3.38623	3.19875	3.65605	2.42751	3.74817	3.86945	3.94734	2.34025	1.85966	1.69526	5.07627	3.02958	2.28802	1.66516	0.88338	3.39801	1.90006	2.66042	4.70179	3.12213	1.74752	1.85438	1.70984	2.4172	-0.230485	1.3897	0.750026	0.378049
223	1.37078	2.18249	2.56502	0.564572	1.48453	1.24513	1.94498	2.54784	1.33792	1.90371	1.39918	2.79829	0.590362	1.44657	0.750936	223	0.358082	3.37017	1.53785	4.03567	3.91376	2.89323	3.99976	2.91702	2.21063	3.632	4.14922	2.81647	4.14405	1.35823	1.84456	2.04742	0.93848	1.99965	1.57077	3.01045	3.94686	0.727297	2.50071	1.97609	0.754025	3.20866	-1.32074	1.80739	0.920491	0.0547519
224	1.45437	1.9053	1.09212	1.1893	1.39722	1.42321	2.60569	2.07608	1.64797	1.07306	1.01585	2.61588	1.72731	1.09141	1.00481	224	1.69721	3.67384	2.39786	2.23411	4.05511	2.38299	3.70488	2.55262	2.10264	3.87698	3.35066	3.15692	4.48202	2.38873	2.56233	0.651504	1.60295	3.05721	1.53333	2.59704	4.17081	2.22976	3.26624	1.34269	0.150159	2.53587	0.272398	0.954599	1.15674	0.786266
225	0.771792	1.91401	1.6785	1.16226	1.00025	1.12329	1.06279	1.04611	0.966072	1.90232	1.49157	2.76852	0.668648	1.18334	0.831941	225	1.09844	3.50906	2.4	1.29299	4.03035	3.02533	3.5023	3.3413	2.78679	2.12324	2.48901	2.77754	4.32376	1.09764	2.20471	1.57808	1.43452	2.66634	1.49975	2.12893	4.71096	2.85601	1.92552	1.03588	0.616662	2.35455	-0.998727	1.81861	1.19698	1.49747
226	1.24897	2.49164	0.477007	0.174401	0.0958681	1.28408	0.989905	2.23168	-0.202749	1.05975	1.45743	2.79125	2.12434	1.27483	1.39332	226	1.5081	2.47447	3.07669	3.03839	3.24021	2.61235	3.01937	3.45778	1.38471	3.4601	2.08079	3.61057	5.16777	2.79062	1.73114	2.30501	1.22757	1.49073	1.09257	2.2182	4.29465	1.9793	1.86688	3.19361	-0.531762	2.594	-1.22928	0.80741	1.44631	0.559772
227	-1.20384	1.36474	1.14671	1.27739	0.181297	2.53063	0.0247436	1.79469	1.84105	2.15106	0.906059	3.49558	0.861915	1.24866	0.352597	227	2.1863	3.34361	1.89807	3.45649	3.35391	2.74314	2.85885	2.78784	2.64829	2.13487	3.38071	3.44743	4.02429	3.09596	2.84112	1.3319	2.21206	2.90455	0.614898	1.5166	4.03101	3.15844	1.80802	2.20408	0.654259	2.86263	-0.907569	1.89303	2.48511	-0.227983
228	0.0164408	2.1379	1.46556	0.343753	1.95316	1.67521	-0.216985	2.62296	0.0137744	1.2231	0.901588	3.47088	0.0838975	0.239734	1.18459	228	1.13557	3.37966	3.4475	1.6635	3.22566	1.91999	3.70018	3.23291	1.31829	2.33285	2.23432	3.48956	4.95575	1.10784	2.32655	1.43768	2.15848	2.67658	1.65464	2.23898	4.62865	1.23402	3.76628	1.44982	0.907484	3.87156	-1.48562	2.64043	2.10856	-0.157229
229	1.40421	1.42435	1.41096	0.513735	0.992935	0.946805	1.81954	3.46259	2.58004	2.1685	1.27708	2.05895	1.37558	1.4453	1.55667	229	0.189654	3.29451	2.94116	2.61185	3.53766	2.51033	3.05064	2.50462	2.622	2.13135	1.15908	2.07301	4.97057	1.77407	1.61345	0.910158	1.89617	1.89901	1.93889	2.50433	4.43203	1.89801	3.34188	1.315	-0.817448	2.90165	0.0726144	2.1209	0.994354	0.902132
230	1.10692	1.4955	1.37908	0.471178	-0.46264	1.55893	1.71557	2.26072	0.480007	2.80421	0.998348	1.90941	1.21574	0.776486	0.964682	230	1.47883	3.93171	2.16593	2.22623	2.88982	2.07498	3.13551	3.01933	3.54208	2.6443	2.39252	2.81267	3.66766	2.77015	1.42059	0.921114	1.46709	3.40318	1.5277	1.54411	4.47598	0.610809	2.85732	1.7088	0.0371167	2.21806	-0.440391	0.579407	0.700593	1.51957
231	0.767592	1.4842	1.1054	0.605039	1.08169	1.20215	1.32145	1.11195	1.56933	1.16424	1.2339	2.74484	0.551409	1.85806	1.20598	231	0.394052	3.66586	2.16589	2.88051	3.67061	1.78805	3.20354	3.5298	1.93584	2.0019	2.04833	1.46019	3.9628	2.20366	2.2154	1.49834	2.12577	2.34525	1.90109	0.791969	5.29965	1.13136	2.37227	1.31793	-0.288611	3.40761	-1.16333	0.0628881	0.00163378	0.692476
232	0.28997	1.78701	1.17442	-0.404504	1.67365	2.33078	1.92366	2.29049	0.789565	2.49846	0.818376	2.15172	0.141873	1.30776	1.11333	232	0.814	4.17531	2.1451	1.64636	2.47081	2.38624	3.74955	3.79171	1.62754	2.63494	3.05967	2.88368	4.85806	2.31262	1.86643	2.1975	1.42406	2.78443	1.38625	2.76289	3.90008	2.12995	2.78148	2.00187	-0.0182203	3.08655	1.83029	0.191261	0.959547	-0.0475932
233	2.17278	1.35346	0.403377	1.38283	0.653277	1.43054	1.86661	2.64489	1.88002	2.0011	1.19411	2.04191	0.852932	0.710234	0.91486	233	1.37231	3.54023	2.38485	2.62374	3.22816	2.9357	2.74341	2.26271	2.76165	3.09674	1.91929	3.23275	3.26516	2.88883	1.94213	0.7572	1.7272	1.38111	0.656754	2.92077	4.36079	0.521776	2.67143	0.417111	0.882462	1.47652	-0.767337	2.02339	1.17669	0.981752
234	0.815462	1.77368	1.78207	0.226741	1.18004	1.93683	1.16812	2.87124	1.64784	1.17217	1.43394	1.91418	1.10202	0.791128	0.889703	234	1.9419	3.261	2.01809	1.2873	3.05159	1.70937	3.94179	3.08489	3.01016	2.35437	3.2365	2.97032	4.33946	1.96762	1.90207	2.58077	2.74086	2.69368	0.595939	1.91471	3.63949	1.16207	2.24201	2.66531	-0.322638	2.63063	0.0951417	1.5327	0.831185	-0.0544111
235	-0.0385525	1.16463	1.2	-0.895972	0.491997	1.31616	1.79992	0.763678	1.9989	1.40102	0.622669	2.41638	1.52457	1.34443	1.56907	235	1.94985	3.66308	2.39995	3.55996	2.85249	2.99965	2.29804	2.86257	1.82229	2.05149	2.85273	3.4227	3.52842	2.17715	1.907	1.08703	1.39286	1.58949	1.57001	2.19381	4.14231	1.19778	1.81516	1.45173	0.117385	1.65635	-0.635354	-0.0688059	1.4796	1.04817
236	1.40145	2.86461	1.51114	1.22555	0.473648	0.870607	1.63023	2.02359	-0.504737	2.47966	1.70203	3.81021	0.517529	1.79614	0.367725	236	0.692237	2.11859	2.00072	1.42025	3.13307	1.73646	3.88533	2.67922	1.63016	1.17338	3.51096	1.60475	4.4837	2.23372	1.61448	0.394016	1.28385	2.17866	0.80485	2.0356	3.56436	1.62923	1.65677	2.15576	0.908809	2.84489	-1.60182	1.12358	1.68179	1.09221
237	0.992071	-0.559987	0.883473	-0.421046	1.30873	1.02231	1.03782	2.85564	1.20316	2.43426	1.17859	1.87256	1.38851	1.29147	2.33105	237	-0.196365	3.70011	2.53665	2.58055	2.99687	1.91181	4.00566	1.56832	1.99311	1.6197	2.52926	2.9524	4.10368	2.34739	1.83853	0.577909	1.6708	1.57021	1.35067	1.94635	4.65092	2.18017	2.18625	1.4673	0.412029	3.05473	0.139462	2.21025	1.80092	0.613099
238	1.99303	1.92584	1.69829	0.123356	1.29498	1.116	1.10095	2.734	0.392567	2.02326	1.14651	2.83817	1.18105	0.380056	0.854296	238	0.241471	2.47075	2.24489	2.70208	2.62094	3.01906	3.12571	2.46702	2.23132	1.90626	2.3132	2.88564	4.17634	2.31345	2.01845	0.416621	1.98278	1.7701	1.0807	2.08064	4.61492	1.79127	2.29497	1.32591	0.619335	1.73864	-0.740013	1.59544	1.47191	0.779338
239	1.46994	2.53071	1.67898	0.301449	1.10371	0.917703	0.813589	3.20277	1.07395	1.67889	1.74184	1.06899	1.61304	1.05077	1.33542	239	-0.53601	3.30199	1.97849	2.56223	2.35123	2.34405	2.78905	2.49168	3.48104	2.7133	2.01448	2.48232	3.38009	2.48021	1.5783	0.860364	1.06165	2.88907	1.5448	2.31258	3.69896	1.50105	2.13084	1.08892	0.34369	3.88323	0.667107	1.53636	2.1029	-0.168818
240	0.653165	1.92696	1.94993	0.0641124	1.08387	1.27923	1.65774	2.26609	0.47987	0.648604	1.77821	2.92852	0.690378	2.17977	1.12079	240	1.33716	2.9488	2.57685	2.05237	1.51578	3.19059	2.98999	4.03388	2.88301	1.8585	3.32388	3.49531	3.066	2.51222	2.63488	0.754139	1.65318	1.38919	1.0316	2.45997	4.09213	1.82106	2.66604	0.927449	0.558069	2.6017	0.168428	1.73851	0.838543	0.132169
241	1.4142	1.23754	0.727684	-0.190458	0.770619	1.65105	1.11486	1.3819	1.2228	1.52856	1.14176	1.18046	0.768233	0.912726	0.527671	241	0.872396	2.59679	2.67743	1.85816	2.87044	1.53631	3.33658	2.74239	2.35193	2.3423	3.01824	2.35562	4.6139	1.97105	1.63332	1.60977	1.55231	2.16235	1.40602	1.94713	3.58391	2.68407	1.85765	1.67161	1.34495	2.89521	-0.0957005	1.18018	1.16901	1.56108
242	0.347312	1.59205	1.79071	0.472946	1.54552	1.79176	1.61592	2.84742	1.07824	2.57693	1.26184	1.7298	0.867768	0.768949	0.982903	242	0.741836	2.60824	2.18946	2.57353	2.59553	1.158	3.90969	3.69172	2.48231	1.82034	2.36344	3.95178	2.60606	2.40621	1.73515	0.242432	1.53764	2.42589	0.254617	1.87455	4.10068	1.44606	1.05948	1.55016	-0.75837	3.45458	0.609286	2.02031	0.995167	1.0857
243	1.2115	1.48263	0.877647	0.665018	0.747955	0.928642	1.44996	2.42553	2.37764	1.6018	1.65777	2.57883	1.64102	0.577079	0.755388	243	1.90077	3.6692	2.44183	1.73115	3.23454	2.8318	2.43109	2.96314	2.02929	1.98449	2.88565	2.43855	4.07152	2.09699	1.9953	2.23039	1.02102	2.42465	0.621879	0.996916	3.95901	2.60944	2.07427	1.44622	0.1569	2.82367	-0.179912	1.43411	2.40207	0.475298
244	0.903837	2.00204	0.36935	-0.14866	-0.0232588	0.346722	2.57585	0.610012	1.39021	2.11458	0.329254	1.62227	2.02407	1.64603	0.844381	244	-0.150217	3.5355	1.89553	1.44003	3.11412	1.69485	2.76867	2.70549	3.04465	2.71346	2.1902	3.16372	2.133	1.99308	1.71338	0.695395	1.77347	2.30346	1.11716	1.42172	3.68871	3.62535	2.33467	1.86375	0.633201	3.11577	-0.86513	1.86075	1.67647	-0.0942635
245	0.822498	1.15093	1.63834	-0.0409495	-0.627519	0.784224	0.984065	1.99865	1.74365	2.95351	1.3691	1.68472	1.09347	1.27056	1.21642	245	0.977394	2.74212	2.34751	1.99671	3.34826	2.31357	3.63953	3.23852	2.84544	0.740301	2.742	3.37442	3.8011	2.07148	1.93425	0.983827	2.91704	1.94058	0.533191	2.37967	3.9132	1.32712	1.32166	0.711227	0.573649	3.02348	-0.31989	2.41069	1.57356	0.936145
246	0.885027	1.25522	0.858862	-0.0893219	1.26337	2.52307	1.94166	2.94758	1.15717	1.3908	0.967324	1.54031	0.987318	1.67198	0.424904	246	0.753016	2.678	1.60644	1.9041	2.50445	1.48895	2.94763	2.41293	1.85251	1.36267	1.69497	3.84919	2.06981	2.16022	1.69442	1.01634	1.28756	1.88209	2.11218	2.65286	3.56201	3.12191	2.10682	0.749804	1.4466	2.20765	0.40318	1.56347	0.509154	0.79779
247	1.73927	1.45281	0.800635	0.110043	0.275291	0.728782	0.729383	2.15804	1.74397	1.79959	1.99141	2.23517	1.28018	1.87186	0.237296	247	1.42373	3.08829	2.25934	2.21435	3.78145	2.57531	2.72338	2.9998	0.557295	0.615059	1.67382	2.99014	3.84709	2.4198	1.91895	1.3335	1.14656	1.28394	0.561032	2.17609	4.0416	1.81474	2.35419	0.902426	0.308461	2.50871	-0.249586	1.30361	1.05684	0.792229
248	1.71049	1.86858	1.30983	0.702109	1.8211	1.42831	1.32436	0.561145	1.02671	0.611669	0.969364	2.30707	0.201158	1.2547	1.14322	248	1.30312	3.17051	2.8572	2.56548	2.55203	1.44632	3.90911	2.51111	1.71882	1.7817	1.41845	4.72816	3.16741	1.66021	1.78612	1.34469	1.75897	1.92897	1.1581	1.7941	3.78377	2.02017	2.40278	0.777611	1.17499	2.04519	0.588946	1.63041	1.00791	0.685447
249	1.48225	1.71059	0.804907	0.468399	1.07098	1.4373	-0.502016	1.57411	0.198164	1.63706	0.0200564	1.18562	1.59934	0.714542	1.37872	249	0.700877	3.84593	0.972176	2.32229	2.99967	1.35952	2.28462	2.05094	1.73805	2.3873	2.41635	1.97573	2.0926	2.54394	1.62143	1.17543	0.563015	2.54259	1.51746	2.29583	4.21623	2.91932	1.08551	0.55726	0.330963	2.99911	-1.73612	1.787	0.896862	1.06099
250	0.102494	1.44762	1.40034	0.673457	1.02905	0.331005	0.951645	1.96436	1.72684	1.22338	1.85465	1.69482	1.04346	0.646643	0.547778	250	0.510726	2.94893	2.38875	2.3258	2.90964	2.17515	2.72227	2.95258	1.17014	1.2049	2.11551	1.95916	4.37056	2.24944	1.71693	1.82755	1.65595	2.24579	1.69071	2.14696	3.59127	1.44609	1.62384	1.4653	0.720258	3.16529	0.0901178	0.931148	0.912077	0.823047
251	0.21295	2.67109	1.14343	0.1955	0.0432771	1.59988	0.33637	1.66899	0.716557	1.19113	0.31276	1.21581	1.30465	-0.0236831	1.50038	251	1.30052	2.8834	1.79725	1.50655	2.46722	2.03146	3.44997	3.01395	2.92686	0.793868	2.11285	4.03223	3.46371	3.12006	1.27352	1.31876	0.925768	2.37936	0.489331	2.41969	3.47854	1.95832	1.50821	1.48561	0.739028	3.52434	-0.811899	1.51072	0.839692	1.13761
252	-0.297871	1.73051	1.9157	-0.54606	-1.34467	0.73775	1.12606	2.38744	1.24426	1.85521	1.96089	1.61112	1.2651	1.49907	0.434069	252	-0.619647	3.24811	2.32807	2.16906	3.57494	1.71138	2.97865	1.62733	2.46157	1.1739	2.58614	3.5349	3.22844	2.21251	1.65908	0.876628	1.36577	2.02926	2.0782	2.29431	3.37518	1.21466	1.33924	0.835097	1.53844	1.56427	-0.674268	1.6497	0.981676	-0.00333262
253	1.67475	1.23012	0.566461	-0.32539	1.35464	1.22186	1.32206	2.70046	0.93628	1.57975	-0.216937	1.77329	1.40065	0.199684	1.18013	253	1.38601	2.92316	1.90079	1.47086	2.91452	2.29048	3.9042	2.35605	1.54468	1.40843	1.24883	2.69958	2.88626	1.68889	2.75128	1.20659	0.696408	1.32238	0.61202	2.70375	2.95024	1.24558	3.13473	1.53155	-0.312508	0.997073	-0.257057	1.15705	1.51447	0.852259
254	-0.0804729	1.72021	0.971117	0.245674	1.25726	0.865398	1.65089	2.25835	1.47525	1.0189	0.900783	1.96897	1.57575	0.884032	0.13013	254	1.25732	3.64067	2.22664	0.965182	3.10512	2.5473	2.10579	1.84113	2.05552	1.54933	1.62328	3.50096	2.89789	2.44411	1.56757	0.357704	1.56741	2.42094	1.72274	2.01028	3.01075	0.547453	2.87779	2.11772	0.680501	2.59784	0.0347185	1.1084	1.06148	1.08538
255	0.505435	2.03062	0.40997	1.0998	0.937429	0.30795	1.47655	2.36691	0.850498	0.718393	1.51697	2.53932	0.00555372	1.12396	1.16494	255	0.560571	1.75025	2.59095	1.72608	3.62663	2.87557	2.54006	2.06304	1.57807	2.43775	1.3062	2.50756	2.62804	1.16458	2.60154	0.69141	1.32651	2.99991	1.49835	2.291	4.29808	1.05216	2.60774	1.3426	-0.816888	1.35674	0.497488	1.55538	1.0875	0.756061
256	1.35258	1.80311	2.163	0.501586	1.34792	1.60419	1.30034	2.67241	0.249544	1.05453	0.577108	2.07901	0.623242	-0.80346	1.09089	256	2.48096	3.12968	2.10659	0.88205	3.46477	1.5253	3.9215	0.990637	1.68519	2.34188	2.29236	2.04429	2.52684	1.81065	1.64232	0.30856	0.984543	2.53911	2.23043	2.5075	2.52506	2.99836	1.90287	0.55996	0.0305941	1.83056	-0.0830363	1.12999	1.19403	0.601859
257	1.3673	1.69431	0.957242	0.551986	0.0950571	0.707013	0.32287	2.98047	1.196	1.72781	0.0759715	2.58366	2.05608	0.924712	-0.0506429	257	0.24882	3.34835	1.96396	1.34944	3.1091	1.62567	3.55172	1.84485	1.86454	0.882256	1.35093	3.69489	3.2317	1.37596	2.07427	1.22013	1.36937	0.651321	0.694675	1.19396	3.09269	0.988371	1.47438	0.94143	-0.545529	1.54786	0.162732	1.93119	1.01355	0.337674
258	-0.557454	2.69337	0.276863	1.35142	0.29517	1.62	1.21368	2.0308	0.71658	0.973719	1.29065	1.85601	1.63847	-0.210748	0.206258	258	1.78625	3.42006	1.87525	1.31806	2.95261	1.71141	2.15975	2.94267	1.32597	1.06574	1.22691	3.49548	3.15146	1.08555	1.56636	-0.348412	1.57848	1.76313	0.0376174	2.33149	3.44685	1.32387	2.70178	1.58556	0.378258	2.61206	0.317851	1.83292	1.38301	0.00776879
259	0.501394	1.6718	1.00994	0.931991	1.81232	2.09415	1.01516	2.65263	0.993742	0.309832	1.81976	1.57835	1.57176	-0.339172	1.01947	259	1.01168	2.95405	2.85699	1.87295	3.6215	1.74944	1.92068	2.4078	1.52616	1.64289	1.74469	1.73831	2.39084	1.52085	1.82001	1.25473	1.76227	1.41667	1.6138	2.85256	2.29093	2.79443	1.11983	1.0775	0.0429556	2.15926	-0.814645	1.51051	1.20824	0.646575
260	1.43151	0.987283	1.04663	0.543301	1.67824	1.33453	0.307198	1.94585	0.955615	2.34246	1.37358	2.29308	-0.224984	0.747922	0.491622	260	-0.469952	1.96163	2.52391	1.08627	3.14812	2.72293	3.42868	3.25256	1.75952	2.95493	1.81421	2.60065	2.60366	2.53264	1.09197	0.397921	0.589225	0.753977	0.406769	1.95652	2.97973	1.97714	1.50028	1.69886	-0.755835	1.79904	0.324546	2.35889	0.0721023	-0.0508233
261	1.4681	1.37994	1.0634	0.704587	1.45754	0.633349	2.09223	0.157201	1.29935	0.811885	1.1684	2.02454	1.55073	1.12694	0.830116	261	0.814411	3.12741	2.01755	1.15782	3.2457	1.56374	3.09075	2.98516	1.86922	1.13644	1.67716	1.61865	3.09082	1.44164	0.722257	0.503686	1.61058	0.85633	0.641159	1.74458	3.47872	0.689275	2.13538	0.456635	1.10266	1.6923	-0.158755	1.74055	-0.0515899	-0.0193635
262	0.360706	1.50164	1.34585	0.350469	1.33886	1.65432	0.455388	2.1761	2.13413	0.954483	0.534172	1.64106	1.57732	1.61775	-0.267845	262	1.14262	2.4794	2.66666	1.29258	2.17212	1.79046	3.71629	2.66444	1.48317	1.51452	1.44763	2.04137	2.74252	1.83894	2.16876	0.750511	1.25605	1.61346	1.25025	1.53114	3.54045	0.525309	2.58263	1.50598	-0.0932578	1.45011	-0.813594	2.08539	0.637312	0.783607
263	0.415144	1.94945	1.42744	0.611139	1.42819	1.57492	1.09493	2.75406	2.2274	0.828266	-0.187763	2.85207	1.80158	0.403845	0.796603	263	0.980545	2.04468	2.35533	1.61895	3.20715	1.31947	2.164	3.02632	1.15365	1.08929	1.69924	2.15768	3.41912	2.05974	2.47766	1.2139	0.866898	0.80844	0.174227	1.82651	3.31137	0.953307	1.75878	1.41781	0.14424	2.79249	0.718386	1.4647	0.879181	-0.0618786
264	0.118891	0.269117	0.538211	-0.195672	0.264603	2.03445	1.74638	1.74148	2.33756	0.649399	1.21118	2.61503	0.92554	1.4752	0.755599	264	1.16663	2.86186	2.38701	2.19961	2.94048	2.27271	2.92105	3.88943	3.63457	1.76039	1.75846	2.27807	3.25679	1.05202	2.0762	1.00536	2.01965	0.915871	1.89551	2.01362	3.51385	1.12394	1.74172	1.16514	0.823603	2.42165	-0.767437	1.26988	1.5197	-0.407289
265	0.808662	1.46396	0.880709	0.428776	1.07677	1.66107	1.34078	1.40018	2.16638	0.799225	0.77343	1.16293	1.49362	0.411896	1.15027	265	1.26428	2.04914	2.37861	0.953219	2.61664	2.83607	4.13624	2.18803	1.7615	1.34505	2.99055	3.09535	3.57556	1.31308	1.07804	0.186387	1.29364	1.24648	1.68966	1.68985	2.89064	1.26871	2.26986	1.17458	-0.324024	1.68287	-0.0611667	1.38118	-0.549004	0.0609865
266	0.931799	2.04039	0.825347	0.453251	2.12313	1.31367	1.49698	2.86192	0.543452	1.74366	-0.0585105	2.28162	0.97435	0.253137	0.382759	266	0.0326294	2.70635	1.80242	1.12915	3.03304	1.47776	2.0514	2.5892	1.05954	0.888912	1.63588	3.44874	2.7665	2.06244	1.96246	0.297772	0.167947	0.643137	1.18665	1.95754	3.19507	-0.853813	2.08085	0.297084	-0.340511	1.59486	0.232013	1.21264	-0.111754	0.354644
267	0.120453	1.04006	1.85391	0.107331	1.05277	1.15424	1.92974	0.950078	-0.77435	0.590465	1.56458	1.45335	-0.295333	-0.193676	0.914811	267	1.55354	2.11981	1.66942	1.02012	2.46586	1.63679	2.94067	3.1207	1.36162	1.50874	2.27934	2.28834	2.49797	1.82254	0.311372	0.251709	0.451824	0.68467	1.70366	1.70066	3.39655	-1.73662	1.51982	0.544037	-0.122324	1.43793	-0.744415	2.30303	0.555669	0.767697
268	0.562503	1.41024	1.50876	1.0765	0.322322	0.823803	0.544859	2.23538	0.483843	0.877488	0.351262	1.96899	1.78726	0.394184	0.795142	268	1.45274	2.85423	2.19059	1.34455	1.84403	2.36444	2.4831	1.85958	2.21454	1.27039	1.76531	2.88461	3.09148	2.11363	1.59723	0.025572	1.22351	2.50565	0.349862	1.84712	3.87457	1.12253	1.66487	0.907253	0.909853	0.992589	-1.18944	0.194232	1.20737	0.364493
269	1.25811	1.76547	1.21418	1.72785	1.17392	0.42918	0.878614	2.4592	2.20112	1.53028	-0.196944	0.79825	0.595517	0.25306	0.543429	269	1.25433	2.31918	3.05127	1.94705	3.26413	2.05747	2.85851	3.07447	0.351111	1.96541	2.37329	2.70399	3.45873	1.94772	1.86305	0.101606	1.03022	0.545395	1.76331	2.20652	2.43464	1.42792	2.34614	1.9854	0.160731	1.40338	-0.547795	1.69446	-0.0166053	-0.0105509
270	1.20633	1.70722	0.227789	1.44142	-0.44665	0.63028	-0.389534	2.20363	0.777554	1.40378	0.479931	1.29467	-0.158315	-0.259042	1.24326	270	0.285339	2.97375	1.87069	1.28814	2.37083	1.97248	3.00802	4.32244	1.8379	1.4989	1.66847	2.89046	1.96514	1.16241	1.39546	0.117256	0.379271	1.3322	0.887486	1.54359	2.92495	1.79528	0.574849	1.12722	-0.539491	2.25113	0.181758	2.70229	0.546773	1.31881
271	0.660319	1.07186	0.840457	0.952479	0.832952	1.22507	1.50608	2.16806	1.21713	0.222192	0.612428	0.537497	0.36909	-0.28701	0.435483	271	0.741701	3.30959	1.41438	1.01912	2.25717	2.29369	2.42529	3.19899	2.36266	1.70742	2.70842	2.47877	1.80843	2.07192	1.38106	-0.85959	0.957246	1.04618	0.882389	2.15222	2.66984	2.53489	2.65868	1.93192	-0.51107	1.71164	0.0374155	1.6274	0.483767	1.33674
272	0.0737715	1.69363	0.924038	1.29622	0.812548	0.780517	1.30082	1.01953	0.181175	0.718277	1.25913	1.56923	0.994674	0.192038	0.589759	272	2.0596	3.39165	2.23018	1.40883	2.87796	2.17327	2.70847	3.93139	2.16051	0.999326	1.15261	2.71327	3.4895	1.39055	0.728647	1.17755	0.434192	1.12254	1.16295	1.47839	3.47583	1.0007	2.12075	0.48875	-0.0841149	2.06161	-0.545051	1.64298	0.491039	0.533332
273	1.23349	2.58698	1.43737	1.17345	1.56931	0.765577	-0.416641	1.51176	1.2111	1.92565	0.683607	1.84432	1.26618	1.70772	0.622775	273	1.04881	3.51157	1.80336	0.726382	2.88697	2.01885	3.32963	2.35981	1.18838	0.841708	1.84151	-0.219679	2.4629	2.51804	0.370782	-0.503522	0.245821	0.849396	0.851767	1.91917	3.80247	-0.156051	1.45914	0.4231	-0.737848	2.29687	0.364346	1.30685	1.01048	0.000358658
274	0.690836	1.43973	0.8098	0.859798	0.618694	0.627688	1.94254	1.98209	0.18842	0.485546	0.723849	1.87486	1.33708	0.558484	-0.118196	274	0.47599	1.88846	2.61485	0.352234	2.10636	1.7134	3.50372	2.41614	1.33405	1.20731	1.95308	2.66321	3.34957	1.60677	1.47219	0.449047	-0.0493829	1.25021	1.14216	1.70162	2.55674	0.725582	1.77834	1.12006	-0.729308	1.88827	-1.07161	1.40971	-0.577843	0.870532
275	1.5751	1.69224	0.42202	0.655225	0.802995	0.424766	1.05182	1.91209	1.11062	1.25769	-0.0435105	2.35463	0.834766	0.314269	0.361392	275	1.89352	3.28646	2.40656	1.52863	3.26446	0.784106	2.9164	2.27475	0.350454	0.584003	2.39573	2.77554	0.967494	2.00215	1.58587	-0.956348	0.461197	1.33931	-0.410025	1.86106	3.32446	0.072303	1.50364	0.621858	0.740946	1.82679	-1.66849	1.40186	0.366764	0.137378
276	0.596034	1.22985	0.364157	0.629312	1.07561	0.289263	1.69804	1.74502	-0.853903	1.40446	1.0697	0.627926	1.41014	0.806365	-1.19804	276	1.66966	2.47893	1.8991	1.30896	3.00612	1.84267	2.2136	2.52497	3.05687	0.971203	1.37165	3.09351	2.31462	0.880478	1.54539	-0.541092	-0.611567	1.88847	0.256555	1.20662	3.04133	1.68272	2.00303	0.564344	0.0170839	1.64576	0.13205	0.905293	1.06308	0.405675
277	1.67117	1.39489	-0.0350514	0.409947	0.490842	0.873543	0.996148	1.81488	1.0388	0.905739	0.664313	1.94727	0.836887	0.926864	-0.2289	277	0.729824	2.17069	1.99639	1.13545	3.01538	1.49205	2.48577	3.63026	0.793924	2.01021	2.22745	2.02746	3.164	1.88227	1.15685	-0.5559	0.672335	1.14399	0.485178	2.64738	2.12021	0.84335	1.51239	0.702248	-0.140183	2.45023	-0.497352	1.75746	-0.604407	0.46105
278	0.606559	2.13562	1.32306	-0.0180314	-0.244365	0.733799	-0.305838	1.09752	1.23058	1.51614	0.864771	1.65453	-0.421987	0.950472	0.566401	278	1.42549	2.39403	2.60561	1.4398	1.43644	1.82283	2.27702	3.03844	1.15082	1.50125	1.096	2.67536	2.0502	1.42606	1.33734	0.239154	-1.35181	2.0417	1.08125	1.85516	2.30224	0.667247	0.776764	1.20649	0.730156	1.1623	-0.596766	0.638101	0.0864381	0.452707
279	0.591552	1.03386	0.995917	0.409969	1.14117	0.702963	1.10721	1.36573	1.64399	0.297042	1.40293	1.11439	1.71173	0.175907	-0.00141021	279	2.00451	2.70922	2.19169	1.2306	1.89524	1.8855	2.05644	3.29379	1.24427	0.747089	1.74951	1.73273	2.59903	2.21055	0.611919	-0.831502	0.110138	0.544749	0.87243	1.71866	2.2314	1.60309	1.86684	0.312072	0.76406	1.76464	0.47316	0.891262	0.701459	0.493018
280	0.132188	0.569423	1.04041	1.18621	-0.240981	0.873055	1.24225	0.483374	0.44123	0.356734	1.69233	0.600114	0.458133	1.41279	0.0875752	280	0.38108	2.34408	2.16658	1.07339	2.52552	1.88546	2.35195	2.17158	0.081055	1.3606	1.84451	2.78561	3.54787	1.76325	1.39344	-0.509631	-0.134319	1.31812	1.31285	1.02206	3.55404	1.94905	0.728623	0.347292	-0.236886	2.40994	0.587741	0.874254	1.0547	0.0796525
281	1.06112	1.53723	1.20116	1.09961	0.336573	0.794492	1.47692	1.77827	1.14525	0.229066	1.00709	1.16082	-0.615675	0.134108	0.893001	281	0.866171	2.1701	3.02481	1.18559	2.41634	1.36758	1.88034	3.44699	1.35263	1.17215	1.80238	0.366015	3.3149	1.57465	1.3507	-0.884418	0.0472429	0.499128	0.431368	2.09148	2.67181	1.9147	2.06604	-0.525424	1.13056	2.62702	-1.71627	0.475558	0.762157	1.00487
282	0.527027	1.31043	1.85837	0.736867	0.611023	1.00634	0.438412	1.20533	1.13972	1.24682	0.735692	1.09904	-0.270195	0.206297	0.188751	282	1.12063	2.72466	1.98846	1.12304	2.03527	1.02586	1.2631	3.16215	2.21414	0.554272	1.83827	3.24796	3.216	0.626957	0.663633	0.224485	0.743969	1.71523	1.62651	0.83264	3.42541	0.164785	0.7392	0.880156	-0.670682	1.25818	-0.847135	0.615269	1.203	0.776819
283	0.450512	1.13535	0.999324	1.03741	0.455906	1.13958	1.41025	2.04177	1.94362	0.51088	0.977573	1.54023	1.60567	-0.143278	1.11268	283	2.08546	2.38497	1.33959	1.13476	2.48743	0.828856	2.59535	3.10623	0.423533	1.59458	1.72816	3.34081	2.35	2.20481	1.82968	1.28682	-1.75785	1.38467	0.180343	1.66585	2.72765	-0.0445985	1.15668	0.126808	1.74774	2.76292	-1.32741	1.22283	0.781948	0.581287
284	0.942372	0.621895	0.333563	0.974911	-1.25546	0.769651	1.1676	1.36864	0.855744	0.964324	-0.126592	1.99665	0.850602	1.07286	0.164695	284	0.922157	1.43015	2.93984	0.560874	2.20747	1.12491	2.38578	3.06331	1.65418	1.5383	0.0644919	2.92929	1.51637	0.858339	2.61662	0.734369	2.00994	1.52179	1.09518	2.34685	3.02098	0.00399098	1.76335	0.0424558	0.419695	2.11884	0.867649	0.575707	1.44661	0.155842
285	1.1447	2.74268	1.26141	0.30356	1.91601	1.01837	0.400568	0.86485	-1.06654	1.03506	1.00696	1.76476	2.49445	0.335868	0.228407	285	0.720222	2.28754	1.46553	0.485848	2.71551	1.7709	2.22744	1.39357	1.65887	0.223482	0.490097	2.83377	0.807209	2.33305	1.66431	0.562427	0.172806	1.08789	-0.249155	1.53125	2.69521	0.979563	1.24077	1.07829	2.13979	1.33274	-0.943336	1.27792	0.46964	1.31311
286	-1.00117	1.50979	1.06101	0.818507	0.220502	-0.826419	1.40447	2.58451	1.47724	0.348455	0.271122	1.22698	-1.46545	0.272186	0.735967	286	0.333879	2.50538	0.560529	2.43572	2.37723	1.61884	2.0639	1.75682	1.73909	1.38858	1.85068	2.45034	2.95186	1.35552	1.32583	-1.06733	0.886466	1.39476	0.47067	1.08351	3.00285	0.202269	2.25405	0.78928	0.941398	1.17853	-1.5205	0.950869	0.980229	0.148957
287	0.487639	0.758641	1.10872	0.608803	-0.536563	1.07231	-0.274546	1.58238	1.07194	0.420445	0.732869	1.2518	0.893496	0.728605	0.766644	287	0.961537	1.77955	2.06486	1.27067	2.52294	1.97135	2.60048	1.8651	-0.161569	0.392224	1.86241	2.10909	1.10281	1.40577	0.989931	0.165423	2.06414	0.844784	0.76892	0.392604	2.75985	-0.350225	2.07717	1.07946	0.327844	2.14083	0.372397	1.95464	1.23494	0.928049
288	0.932604	1.2233	1.46453	0.99024	0.427694	0.660459	1.74211	1.90474	1.52703	-0.00854405	0.581806	1.48483	0.863684	0.614883	-0.771148	288	-0.0100922	1.56294	1.85461	0.962569	2.45482	2.35711	2.70013	2.23767	1.04504	0.926035	1.879	2.00124	0.830485	2.00629	1.72663	-0.50162	1.31314	1.86158	0.317453	0.679404	2.80535	1.22644	0.44184	0.29103	0.405093	2.24943	-0.52985	0.266189	0.832782	0.252112
289	1.45412	2.00921	0.934059	0.797137	0.349019	0.175255	0.292699	1.69276	0.370757	1.24038	1.9204	1.04149	0.499847	-0.19931	0.893806	289	0.898918	2.33036	1.49757	2.07404	1.56888	1.26315	2.84974	1.26565	2.49999	1.59264	2.63323	1.7105	3.20591	1.82902	1.23556	0.314463	1.02852	1.44866	0.626579	1.79305	2.68892	0.904238	1.68108	0.570136	0.420892	2.89008	-0.170663	0.829772	0.909566	0.834876
290	0.864647	1.89888	2.24534	0.42053	0.752049	0.617371	1.30206	1.42057	0.887463	0.995989	0.293591	1.29957	0.549114	0.264606	0.424916	290	1.27851	2.61468	1.45607	0.56963	2.20169	1.27821	2.10809	1.90178	0.482805	0.90539	0.241621	1.24594	2.8372	1.58756	1.16189	0.472194	0.21809	2.03825	0.0217661	0.799414	2.37544	1.18311	1.67627	1.40688	0.630923	1.47693	-0.17101	1.25832	-0.0933568	0.222666
291	1.36914	1.91085	1.42699	0.166094	-0.543099	0.666271	0.945359	1.06865	1.05718	0.904237	0.894371	0.831686	-0.764697	0.483947	0.0728791	291	2.53535	1.67305	2.4214	1.52992	1.89459	1.47603	2.28396	2.97557	1.948	1.67717	1.92967	2.64025	2.17729	2.03185	1.81827	-0.0467206	0.916632	1.15538	1.45617	1.31276	1.98256	-0.952035	1.35077	0.409116	-0.33611	2.0932	-0.857234	1.44568	-0.186354	0.0193957
292	-0.942197	2.14925	1.01312	-0.00938697	0.271344	0.959197	1.56247	2.22596	1.42817	1.42051	0.713954	1.09172	-0.204208	0.478744	0.267065	292	1.00539	2.28969	0.774575	0.85122	1.47663	1.72201	1.23771	2.82369	1.38037	0.975641	1.12365	1.34955	0.33259	1.92287	1.59224	0.302033	0.372197	0.617404	0.954198	1.01601	3.1011	-0.260237	1.54627	-0.893022	-0.32073	2.45184	-0.222713	1.26788	0.712969	0.395284
293	0.215106	1.72057	0.789596	0.560583	0.7995	0.802548	0.451282	0.776291	0.876968	0.52781	0.935766	2.12749	0.712471	0.456158	0.646483	293	0.210383	1.95575	1.55549	0.998804	2.38951	1.6192	2.38078	3.24374	0.669228	1.3191	1.86639	2.54102	1.1358	1.28114	0.463709	0.727365	0.141934	1.5541	0.803703	2.05883	1.92875	1.4292	1.67764	-0.337644	0.112206	1.52499	-0.792665	1.56015	0.455347	0.607863
294	1.20177	0.921777	1.67823	0.669584	0.502725	1.49029	1.06781	2.08161	1.99463	1.11185	0.0439886	2.02575	0.0144377	0.667084	0.464891	294	1.01315	1.85001	1.06911	0.689188	1.03613	1.37276	2.24662	2.82173	2.53822	1.70669	1.69487	2.06589	2.80987	1.5073	0.431215	0.49209	0.380704	0.0741922	0.338254	1.45107	2.34656	0.381659	0.96019	-0.122786	1.26733	1.26957	-0.780776	2.1916	0.271556	0.717187
295	0.587089	1.14376	1.66984	0.934756	0.826496	1.16787	1.71172	0.975766	1.46299	0.989617	0.51595	-0.730175	1.26367	0.980477	0.153902	295	0.663604	2.30038	0.055369	0.959804	1.68974	0.995975	2.59004	2.57478	-0.20958	1.25701	1.37555	1.17841	2.371	1.31044	0.700445	0.369413	1.22664	0.651374	0.0962592	1.32185	2.66607	1.46905	0.471417	0.178895	1.4166	1.84753	0.932978	0.77416	0.861337	0.0650795
296	1.2226	2.2132	0.747087	0.242724	0.397872	0.592279	1.29837	1.34408	0.504816	0.132221	-0.0225758	0.355928	1.11336	1.14002	-0.727957	296	1.21871	1.64044	2.73356	0.877824	2.93746	1.01387	1.25718	2.38284	0.946813	1.60622	1.91763	2.33026	2.09038	1.73269	0.276292	0.21785	0.164955	0.767869	0.561264	1.45474	2.56507	0.924284	1.398	0.55655	0.213002	1.56038	-0.383739	0.459014	0.99895	0.476467
297	0.59989	0.970922	1.541	-0.221876	-0.337949	1.2341	1.46163	2.08698	1.60306	0.833391	0.686452	1.74316	-0.252204	1.4238	-0.204387	297	-0.007685	0.790307	1.29073	2.07908	0.62494	2.14516	1.29288	2.60549	2.17817	0.752874	1.67408	2.98748	2.36789	1.84371	0.977629	0.865143	0.468762	0.207079	0.459016	1.31707	2.04725	0.464095	1.86316	0.692978	0.463364	1.51427	0.78358	1.54033	0.929087	0.425556
298	0.194287	2.54274	1.01599	0.0766289	1.35113	0.651292	0.587277	1.61318	0.169431	1.46413	-0.122718	1.57028	1.36812	0.710516	0.259126	298	1.42474	1.25681	2.06881	1.48222	1.06996	1.73198	1.32253	2.96051	1.32109	1.51849	1.45127	1.99459	2.15918	1.58423	1.29211	0.808234	0.235146	1.38849	0.933779	1.64342	1.27152	-0.920957	0.88446	0.0518017	0.302304	1.3572	-0.58685	1.24926	0.650931	-0.163594
299	-0.717731	2.25122	0.716005	-0.637443	-0.0964835	0.0637122	0.176403	2.61332	0.223119	1.3671	0.379705	0.484268	1.22377	0.388271	-0.191455	299	-1.22764	1.76606	1.44008	1.65067	1.15124	1.43883	1.6172	2.8637	0.789918	1.47179	1.12932	2.50052	2.38186	2.10611	1.08368	0.601678	0.555234	1.24305	0.135213	0.66894	2.45089	1.42908	1.73482	0.531926	-1.41492	0.999156	-0.455664	0.855254	-0.0222844	0.330214
300	0.253999	1.31003	0.566894	1.43522	-1.24778	-0.0400918	0.0206832	0.975946	0.25857	1.06712	0.721425	1.3957	0.0660157	1.01618	-0.493071	300	0.271286	0.771294	1.53273	1.7031	1.32901	1.77086	0.863242	2.35863	1.16642	0.513411	2.33537	1.23662	3.54366	1.44852	-0.301999	-0.189881	-0.235561	0.566878	0.810467	1.42262	1.36314	0.628239	1.23648	0.700296	-0.317122	1.97544	-0.195766	0.710786	0.25705	0.288771
301	-1.04393	1.59516	0.0718538	-0.841265	0.545913	0.854295	0.000233326	1.24684	1.07528	0.280693	0.256156	0.380196	1.4091	0.342693	1.04963	301	1.01859	1.2908	2.14234	0.940149	2.38952	0.14364	1.03531	2.67226	1.41538	1.8088	0.867488	2.43056	2.41063	1.70023	1.1808	0.446616	2.21758	1.58572	0.290531	1.601	2.50415	0.0790762	2.09806	0.234191	1.31769	2.35921	-0.922665	1.29534	-0.300954	0.960884
302	1.10038	0.651602	0.799336	0.0639014	0.43406	0.31077	0.322864	1.73665	-0.98424	0.238643	0.0277801	1.80466	0.889789	0.785594	-0.34354	302	0.57436	1.52349	1.65829	1.40228	2.21562	1.67887	2.32142	2.0564	1.03493	0.115583	0.769532	2.26851	2.92391	0.822773	1.08353	-0.810667	0.550764	1.01517	1.84915	1.66994	2.45265	-0.248938	1.46501	0.356262	-1.0986	2.19398	-0.267685	1.44862	0.752089	0.465301
303	0.282299	2.07408	0.956399	0.857001	0.274558	0.425138	0.198556	2.08693	0.781645	0.691691	1.13079	2.51192	1.4296	1.38066	0.074366	303	0.675661	0.184495	2.44466	1.47024	1.89691	0.750294	2.65817	3.23073	1.54487	1.08619	1.42041	1.72785	2.77638	1.13463	1.51616	-0.432762	1.26963	0.611439	0.553921	1.44212	2.32699	0.771905	1.253	0.717999	0.147444	-0.953642	-0.77176	1.82039	-0.434097	0.43279
304	2.39931	1.05568	1.03952	0.471964	0.739459	1.02912	0.404587	1.47116	-0.222069	1.54782	1.26059	0.703772	-0.593397	0.534761	0.541426	304	0.321828	1.48336	1.61541	0.127374	1.91154	1.4698	0.936097	2.62803	0.900667	1.44068	0.196048	2.32852	1.85685	1.35727	1.08731	0.355498	-0.382922	1.3626	1.12419	1.72435	2.18627	0.809293	0.995489	0.138007	0.718701	1.89805	0.687197	1.33125	-0.232083	-0.5515
305	0.942952	1.22576	0.741838	0.908125	0.292179	0.726924	0.343976	2.96734	0.563581	1.23125	0.783294	0.624015	0.781623	0.000770884	1.02263	305	1.08886	1.24618	0.765038	1.06412	1.58049	1.74329	1.18614	1.87745	0.0257987	0.72111	2.00225	0.600249	2.78105	1.01835	0.712066	-0.642362	-1.42272	0.953455	-0.0902729	0.886964	2.45217	-0.443263	1.14612	0.809929	-0.0212965	2.41991	0.116036	0.702851	-0.287807	-0.299896
306	1.27123	1.25017	0.410484	0.607906	0.57508	0.875151	0.603082	2.01788	0.470398	1.81545	0.408429	0.781712	0.954747	0.179373	-0.118468	306	1.10813	2.47703	0.721008	0.731908	2.14337	0.137873	1.73165	2.05162	0.509461	1.89012	0.871679	1.21125	2.26968	1.66682	1.00116	-0.63271	-0.315273	0.950231	-0.189742	0.919583	2.24127	0.651055	1.51401	1.40701	-0.611984	1.88711	-0.946379	1.05205	-0.636272	0.269245
307	-0.237225	0.315006	1.21101	0.765968	1.06712	0.978479	0.446835	1.90486	2.09485	1.73542	1.75436	1.09029	1.15737	-0.347643	0.9809	307	0.417915	1.12489	2.18822	0.814343	1.97042	1.01928	1.71324	2.11847	0.967427	1.20875	1.70017	1.85982	2.65428	1.83322	0.610634	-0.816714	0.28586	0.967367	-0.0442018	1.50364	2.61287	-0.116685	1.16107	0.0945102	0.975311	1.85671	-1.12474	0.657131	0.41224	0.489432
308	-1.61368	0.91472	1.13356	0.923743	0.524146	1.33603	1.46806	1.44404	0.5776	1.54913	-0.836132	0.129975	1.14872	1.02521	0.478971	308	0.586065	0.179362	1.34022	1.35353	2.05804	0.39698	1.32264	2.60098	1.64678	1.52323	1.47604	1.04265	2.74678	1.44632	1.11739	-0.458141	0.13156	0.688295	1.04107	1.59707	2.17535	-0.107237	0.113912	0.340317	0.095283	2.18414	-0.514979	1.42661	0.529634	0.169053
309	1.65929	1.14926	1.44555	1.04511	0.823623	0.0818375	1.06025	1.63803	1.49453	0.192811	-0.0518354	0.722761	2.04221	0.641429	0.420565	309	1.41014	1.34599	2.57342	2.03149	2.10361	0.104946	1.23745	2.71362	0.477988	1.74771	0.74383	1.93104	2.17697	1.98903	1.34242	-0.28788	0.716849	0.665566	0.73719	1.41912	2.39632	0.893383	1.89295	0.57447	1.64963	0.439657	-0.542059	0.988736	0.319901	0.443374
310	-0.654712	0.707895	1.32837	0.581872	1.39722	0.249735	0.578144	1.29226	-0.0496277	1.41843	0.0446256	0.887739	0.54863	0.328571	-0.0228762	310	1.14512	1.06901	1.08578	0.670459	1.42331	0.688833	1.26648	1.73352	1.22414	1.15819	1.40053	1.41414	4.15323	0.696131	1.54508	-0.504905	1.02691	1.38705	1.26913	2.06014	2.22718	-0.688489	1.69203	1.68767	0.648928	1.25001	-2.50459	0.201581	1.13375	0.569112
311	1.18355	0.899226	1.33726	-0.203799	-0.132649	1.07092	1.80547	1.97349	0.134687	1.51201	0.0661363	1.82765	-0.0153621	0.397728	0.768142	311	1.03799	2.04199	2.29047	0.615227	1.31865	-0.0785133	0.164236	1.61926	1.49058	0.797702	0.325838	2.57126	2.89647	0.72798	1.83414	0.581345	0.820149	-0.0843887	0.357846	2.2164	2.61789	-0.933677	0.934298	1.35608	1.01067	0.606372	-0.881959	0.506982	0.759674	0.00530459
312	-0.0162689	1.61165	1.22918	0.284839	0.581853	0.471437	0.694739	1.178	-1.4781	0.779253	1.39863	0.974393	0.224779	0.339018	-0.089383	312	1.62581	2.99184	1.55364	1.8485	1.96978	0.887591	0.833953	1.762	1.29453	0.247604	2.27091	2.27557	3.04139	1.32079	0.522708	0.0339028	1.29056	-1.08354	0.22367	0.473596	2.49221	1.11459	1.20527	1.00151	-0.04385	1.51675	-0.158243	0.161578	1.29193	-0.688474
313	0.817307	1.47548	0.686633	0.711064	0.214033	0.64647	2.33034	0.755119	0.656953	0.534726	0.382187	2.27694	0.335096	0.306796	0.117789	313	1.93848	1.6324	1.29578	1.24094	2.68819	1.64927	1.41133	1.08811	1.27771	1.03946	3.06762	0.811264	4.29678	0.886982	1.04291	-0.108139	0.605042	1.3079	0.301104	1.03167	2.83483	-1.74884	1.87504	-0.00844458	1.36393	1.77617	-0.65871	1.53892	0.499484	0.690626
314	1.25352	0.854492	1.24005	0.985707	0.849591	0.844064	-0.126844	1.68464	1.45734	0.602056	0.720553	1.02051	1.09355	0.540184	-0.690906	314	1.12177	2.41411	2.13149	-0.187172	2.21295	-0.301584	0.637179	1.78596	1.6426	1.47167	1.96768	2.62219	2.95103	1.53587	0.129384	0.152698	0.822817	0.238592	0.878285	1.54362	1.43407	1.32655	1.37178	0.879405	0.228681	2.24517	-0.106959	1.67883	-0.332487	0.179988
315	-0.194115	2.091	1.44685	1.65014	1.04011	-0.139428	1.06634	0.692104	-1.05765	1.3211	1.01144	0.749241	0.316767	0.451152	0.907446	315	0.765217	1.63973	1.46649	0.973971	1.67409	1.12505	1.28836	3.12078	1.01522	1.89741	0.661731	2.18235	3.3525	1.09088	1.12904	-0.37874	0.967546	0.430041	1.29006	0.71038	1.74575	1.56273	1.51527	0.71559	0.497989	0.905494	-0.180529	1.66038	0.335387	1.08483
316	2.51074	-0.070854	0.858044	0.612841	0.356409	0.792383	1.32752	2.31348	1.17765	1.08642	1.01105	0.400829	0.690763	0.470373	0.968852	316	0.253159	2.28119	2.82783	-0.0387878	1.1533	1.09545	1.9372	2.31047	1.42004	0.666547	0.817839	2.52985	2.25068	1.07419	1.1621	0.159241	0.107741	0.961323	1.13323	0.363312	1.81213	1.63477	1.03805	0.721174	1.29685	1.73429	-0.178075	1.0518	1.27871	0.846639
317	0.781416	0.418583	0.80586	1.35687	-1.37946	1.35285	2.13243	1.30808	0.577484	1.33732	1.36913	1.92389	0.269078	1.65735	1.06415	317	0.771242	1.62432	1.339	0.355173	2.29908	-0.463337	0.00914568	2.92433	0.815573	0.295978	1.46027	3.17257	2.89976	0.629134	0.87561	0.0690769	0.884101	0.107085	1.4586	1.08087	1.96372	2.72578	1.68334	0.488483	-0.233136	0.718529	0.104091	1.14778	-0.0239204	-0.366628
318	0.657842	1.1426	0.702979	0.409512	-0.084611	0.890752	-0.0150174	2.27129	0.755542	-0.0204741	0.018475	1.82049	1.36351	0.455234	0.282222	318	1.40941	1.98705	2.79697	0.508124	1.18219	1.56774	1.27868	1.71604	1.25301	1.48914	2.10383	2.457	2.96163	0.653673	0.510928	0.949691	0.20624	1.23925	0.710877	0.626973	1.91713	0.995486	2.1143	0.90521	0.388493	0.868532	0.705116	0.388528	-0.215472	0.379977
319	1.44634	1.31234	1.27662	0.0730826	0.384733	1.0186	0.457905	1.46177	1.06322	0.0641432	0.585946	1.18041	0.851224	0.0607849	0.59194	319	0.0440674	1.43566	1.55196	0.456696	0.770553	1.45242	1.54892	2.86895	1.54838	0.332609	1.15848	3.62773	2.53698	1.62715	0.0983038	0.612648	0.404282	1.07662	0.012457	1.92616	1.05641	1.20133	0.532802	-0.459166	1.27645	0.105621	-0.952757	0.37936	0.0694611	0.425213
320	1.27514	0.537218	1.23516	1.20847	-1.48966	0.577736	1.7335	0.763008	0.425334	1.82698	-0.400576	1.42088	0.70352	0.719218	-0.777812	320	0.426848	1.3311	0.628452	1.10938	2.19203	1.1128	2.36131	2.97994	0.807774	1.66493	1.60468	0.564187	3.46087	0.95229	0.173737	0.110149	1.24022	0.635632	0.903572	1.41421	2.24529	2.03484	1.28804	0.5634	0.853771	0.977886	-0.531062	1.44629	0.792361	0.428859
321	-0.969205	1.1022	1.24797	0.76232	-0.416614	1.40229	1.78038	1.34394	1.46905	1.40711	0.821866	1.29024	1.10754	0.408936	-0.268935	321	0.702469	1.7509	1.74055	1.36704	2.09301	1.20023	1.63524	2.36259	1.43749	0.184369	1.80938	1.58351	3.05438	0.89156	1.4161	0.22678	1.13921	0.439531	-0.141	0.946917	2.37044	2.53154	2.11407	-0.0505108	0.724578	1.80027	-0.49886	0.669838	1.1548	-1.07904
322	0.233732	1.18824	1.16709	0.604789	1.21916	-0.00442974	1.25633	2.02529	0.731226	0.841001	-0.257261	1.15058	0.306785	0.657148	0.470482	322	0.608363	2.34217	1.71725	-1.00046	1.8522	0.366899	1.4362	0.714356	1.60657	1.98005	0.795572	1.58136	3.50969	1.16598	0.416396	-0.415608	1.24035	1.09707	0.973332	1.17533	1.65253	-1.18008	0.718956	0.992307	1.33162	1.05257	-0.403917	0.0359577	-0.0436805	-0.244621
323	0.609372	0.332236	-0.252497	0.864413	1.59763	0.0299523	0.0608028	1.07446	-0.198321	1.48362	-0.317614	0.953625	0.859082	0.758678	-0.00499302	323	1.33255	2.04193	1.8811	1.08931	0.791702	1.32677	1.98466	2.79207	1.48331	0.875947	0.281878	2.18878	3.43598	0.0721015	0.937124	0.441218	0.872845	0.627303	0.382722	1.11064	1.58097	0.216417	0.626886	0.574198	1.80508	1.18267	-0.664937	1.38732	-0.239921	0.212517
324	0.024688	0.545843	0.794956	0.410913	0.187365	0.573333	-0.476203	1.96931	0.783766	1.27236	0.738316	0.977777	0.422755	0.173663	-0.000962507	324	0.190875	1.88258	2.23637	0.289573	0.997563	1.50916	2.09222	2.88066	0.709398	0.138299	0.775144	1.79715	3.00783	0.75441	0.54469	1.3274	1.38094	0.429366	0.721551	1.44275	1.37099	2.09055	0.544909	0.720295	0.111347	0.47236	0.104785	-0.0895278	0.510252	0.881856
325	0.476816	0.882539	0.922953	0.163573	0.64498	0.584795	-0.802021	0.957971	0.369895	1.07819	0.824906	0.542033	0.500827	-0.03271	-0.140534	325	0.317356	2.39266	2.53376	0.991528	1.81713	1.36744	2.42147	0.806696	2.40703	1.80403	0.82823	1.86438	1.61257	0.578188	1.17798	0.0193007	0.245693	0.827415	0.928901	0.943815	1.33557	1.7928	0.00449071	1.27043	0.356844	1.44962	-0.627739	0.931233	0.271394	0.385855
326	0.714282	0.781834	0.623766	-0.160326	0.604534	0.253613	1.7434	0.745348	0.642705	0.306223	0.0418465	0.866368	1.28377	0.807372	1.07115	326	0.321854	1.45339	0.819612	0.727165	1.42399	1.62233	1.97999	2.80374	1.72247	0.798941	0.71545	1.16519	1.59629	1.09496	1.11734	-0.0868488	0.845025	0.182966	0.776306	1.01697	1.83374	0.158926	0.041847	0.462653	1.10352	1.61335	0.0660416	-0.351334	0.00742233	-0.169025
327	-1.17312	1.56209	0.325085	0.222963	0.971088	0.437908	-1.38536	2.70222	0.607137	0.572814	0.61191	0.724592	1.23946	0.464342	0.0296883	327	0.0833948	2.23311	1.32165	-0.099367	1.76054	1.95996	0.741741	3.01198	0.211775	0.522934	0.632637	1.8264	1.63575	0.913089	1.09209	-1.00087	0.754067	0.0168306	0.0629262	0.737681	2.87448	1.18631	0.850985	0.490768	0.666464	0.995255	-0.46744	0.523565	0.0375665	0.549572
328	2.036	0.0495365	1.43416	0.692666	-0.867726	-0.479585	0.108633	2.82488	0.742536	0.417575	0.280802	0.828901	0.768966	-0.518312	1.55728	328	0.414199	2.30142	2.45571	-0.763222	0.36289	1.64748	1.15855	2.53244	1.10745	0.128056	1.02405	2.19269	1.04591	0.67323	0.371844	-0.0553385	0.861341	1.39709	1.03552	1.13123	1.70874	-0.324681	0.960563	0.368181	0.347217	0.717168	-0.47489	0.455385	0.224801	-0.62676
329	0.852897	-0.409939	1.01695	-0.64656	0.131777	0.628974	1.01467	0.420211	0.142041	1.62434	0.182709	1.13668	0.477006	0.300217	0.342551	329	0.0627016	2.22955	2.33505	-0.313214	2.31235	1.23459	1.41132	2.45905	0.851428	1.47948	1.21294	1.54037	1.10218	1.2143	1.07133	-0.0942161	0.169249	-0.195049	-0.629529	1.68529	1.47992	1.2932	0.235777	0.918354	-0.0705429	0.254085	1.05805	1.00103	0.659073	0.490187
330	-0.66993	1.12084	0.37233	0.545926	0.469134	0.379212	0.567544	1.75	0.422011	1.17131	0.65177	0.620136	-0.486971	0.7627	-0.335156	330	0.462133	2.64675	0.813625	1.67149	0.888952	0.624951	0.63166	2.93812	1.20026	0.242365	0.392612	2.05076	0.558991	2.03384	1.08915	-0.292111	0.411993	-0.0521976	0.116488	1.59241	0.240971	1.06384	0.609549	0.374701	-0.578991	0.694284	-0.957559	1.01253	0.276917	0.367342
331	-0.0426672	0.31092	0.96675	-0.0614954	0.264501	0.489058	0.369126	1.79466	0.107064	0.440667	0.396461	0.0466364	0.796973	1.10808	1.17986	331	0.872624	3.12472	1.14747	1.3535	1.13343	1.18426	1.43566	1.89991	1.8438	0.875584	0.656159	2.40365	1.00484	1.1797	0.41245	0.0711925	1.36994	0.553081	0.0538804	1.61074	1.54351	2.33651	1.13443	-0.191429	-0.229552	0.690718	0.00603909	1.38477	0.221532	0.385192
332	1.83287	0.151884	1.59414	0.835064	0.443078	0.932681	0.469938	1.78323	0.328705	0.981896	1.57106	0.35644	-0.149053	0.681368	-0.072955	332	0.824486	1.48256	0.809465	0.384367	0.854461	0.710702	1.24244	1.15235	0.506906	0.645441	0.776034	1.40429	0.80249	1.11618	0.603444	0.13419	0.615757	0.996154	0.969649	0.440204	1.39172	1.32804	0.158928	1.0141	-0.246124	0.547051	0.890806	0.614828	0.218017	0.483373
333	0.321222	0.537624	0.143594	0.435645	0.203497	-0.0722594	0.908535	2.24753	0.534482	-0.0330925	0.860932	0.944786	1.00762	-0.369671	0.364311	333	0.0549478	1.95479	0.439974	0.126639	0.681125	1.2704	0.846332	2.4644	-0.418648	-0.47203	2.1063	2.01685	-0.5395	0.867686	1.27754	0.0382666	1.00605	1.0333	0.959889	1.36754	1.61048	0.198882	1.14005	1.31534	0.408345	0.443353	0.842541	-0.842106	-0.0650379	0.204544
334	1.02403	1.05762	0.467386	-0.672161	1.35197	-0.180947	2.53862	1.47157	1.35805	-0.578647	0.579213	1.92729	0.855933	0.0835746	0.817459	334	-0.0455132	1.44947	1.67898	0.721962	0.522866	1.30102	1.30073	2.22559	1.16092	1.19731	1.26642	2.37192	0.820346	1.52931	1.42006	0.113379	1.23119	1.17126	-0.985782	1.30378	1.28534	1.43374	1.84412	0.156197	1.11311	1.16271	0.272848	0.580782	0.349836	0.431642
335	1.00455	-0.144197	0.752128	-0.435596	0.705227	0.150287	1.08429	2.77256	0.496773	1.06506	1.77521	0.769063	1.17736	1.27265	0.265851	335	-0.574848	1.1921	0.0640771	0.133684	-0.162933	1.58224	0.917738	1.07695	1.6986	1.04664	0.0811088	0.379086	0.74452	2.0121	0.294637	0.166689	0.681349	0.304708	0.18638	0.643588	1.30626	1.31392	1.9782	1.04309	1.02278	1.2238	-0.52706	-0.024958	0.265309	0.610217
336	0.569675	0.218801	1.20723	0.727472	0.953153	1.37901	0.121264	0.957169	0.515542	1.13551	0.824024	1.05375	0.292065	-0.0427539	-0.323319	336	-0.298075	2.80729	-0.593167	0.411104	0.869514	0.313716	1.46457	3.50945	1.80626	0.649706	0.828928	1.21525	0.525508	1.08603	1.47526	0.841001	0.325169	-0.330041	-0.03288	1.42972	1.36061	1.12871	-0.412727	0.26182	0.570663	1.37241	0.889881	0.277779	0.176404	0.323743
337	1.9376	1.45964	2.32594	1.32651	-0.864048	0.914702	0.153541	1.57444	0.433585	-0.13417	2.23845	1.89959	0.806947	0.608258	0.33506	337	0.257523	1.46016	1.4679	0.507584	0.432988	0.361264	2.51257	1.60831	2.15672	0.972234	2.17243	1.12071	0.651216	1.89667	0.727421	1.3641	0.342356	-0.373663	-0.179163	1.53235	1.91247	0.424427	0.741173	-0.15378	-0.132868	1.10449	-0.227793	1.25737	0.445528	0.894113
338	0.274142	1.00643	1.93732	0.408244	1.07288	0.313219	0.827309	0.739558	-0.654094	0.626674	-0.108338	1.91415	0.568031	0.206926	0.5804	338	0.549447	1.01654	1.87484	0.691401	1.00779	0.389046	1.40514	1.86864	1.38917	0.389962	1.74671	-0.218283	-0.922931	1.52762	1.4062	0.0965281	0.25992	0.868669	0.263748	0.667732	1.93363	1.96356	0.764474	1.09502	0.319218	0.908296	0.0218309	1.13789	0.84199	0.673302
339	0.443353	0.854056	1.26865	0.015049	0.434304	1.32188	1.08208	2.44891	0.415325	0.548582	1.20284	1.80654	-1.29392	0.528526	0.674299	339	1.06447	2.21769	0.888086	-0.857046	0.423453	1.74743	0.980375	2.33072	0.884438	0.313498	0.617238	1.75026	1.01535	1.78036	1.44239	0.51023	0.125658	1.37648	-0.313539	1.08556	2.02117	1.2743	1.13899	0.727345	-0.297341	1.36138	0.318151	1.18171	0.921489	0.579959
340	-1.13634	0.181396	0.741795	0.574902	0.75283	0.286341	1.64917	0.953441	-0.839073	0.296256	0.509381	1.45746	0.918486	0.12078	-0.310721	340	0.39424	1.91578	1.12185	-0.207743	1.6169	1.20444	0.888149	0.981781	1.56038	1.18985	1.54854	2.22778	-0.842797	2.03655	0.777023	0.386076	-1.03477	0.266318	0.00779417	0.808953	2.00148	1.36471	0.489175	0.674408	0.492568	2.22525	0.630329	-0.144323	-2.39002	-0.864049
341	-0.224202	1.25742	0.502306	0.432481	0.148222	0.947107	0.794877	2.34358	0.413417	1.8389	-0.528933	1.7818	0.464763	1.12692	0.64151	341	0.899983	1.73371	0.723619	0.356468	1.55808	0.7469	0.887065	1.90196	1.69034	0.47765	0.801919	1.06815	1.14596	0.552434	0.903659	0.729614	0.0365042	-0.0801151	0.500926	1.33068	1.2005	1.51025	1.4189	1.08587	-0.149065	0.481753	-0.508058	0.0263478	-0.985994	-0.0698573
342	2.0354	1.89425	0.294776	-0.600704	0.765522	0.467506	0.560522	1.18133	0.0573572	0.561433	-0.707196	1.76947	-0.210606	-0.159461	0.673261	342	0.620834	1.86419	1.06921	-0.316237	1.5901	0.971616	1.63713	3.07568	1.22818	1.41176	0.878967	2.16381	0.182228	1.40852	1.24406	-0.452636	0.65431	-0.0532816	1.15753	1.11942	1.04826	-0.289461	0.588841	0.857185	-0.698519	0.0570092	1.15439	1.09599	0.17905	0.859627
343	0.866234	0.169235	0.504478	0.45863	0.215751	0.792745	0.645401	1.29067	1.52364	0.551782	0.496717	2.24941	-0.183849	0.206164	-0.0596169	343	0.716478	2.09678	1.27317	0.813477	1.12174	1.61484	1.52991	1.62258	1.18491	1.28864	1.02637	2.40515	0.882147	1.91184	1.19693	0.485254	0.197569	0.651873	-0.289775	0.759732	1.60674	-0.692647	1.20909	1.25403	0.748864	0.716429	-0.334144	0.766073	0.487291	0.550274
344	0.0444138	0.812475	-0.162138	-0.100767	-0.227701	0.507809	0.94814	0.156301	1.33686	0.0514503	0.131257	0.668089	0.529948	-0.358346	0.166196	344	0.31725	0.593234	1.36338	-0.437308	1.65164	0.972277	1.35084	1.85	0.29138	0.43898	1.27009	2.32255	1.15086	1.77793	-0.261051	-0.0421741	0.0558957	-0.306119	0.323904	0.789965	1.58647	0.728195	1.41816	1.64342	0.562911	1.742	-0.280167	-0.0647955	-0.936578	-0.513456
345	0.766405	0.767498	1.43368	0.889874	0.925908	0.420262	0.438371	0.00948793	0.481932	0.63665	0.589435	0.773771	1.88093	-0.275722	0.468337	345	-0.131464	1.79741	1.28424	0.734323	0.845626	0.772765	1.39793	1.6773	0.791629	0.190519	1.40504	1.78144	1.78822	1.79806	0.967439	1.49065	0.984476	0.244375	0.994286	1.67312	1.75945	0.00239047	0.261117	0.871353	1.36427	1.02642	-0.297875	1.77973	1.00451	-0.41704
346	0.299397	1.63689	1.13358	0.694343	-0.0286712	0.753907	1.77663	2.14549	0.896314	0.137198	0.177531	0.692563	0.929436	-0.118881	-0.493732	346	0.104199	0.18101	2.90185	0.061446	0.606776	0.530801	-0.00834844	0.643638	0.607192	0.0671459	0.920522	1.32811	1.6109	1.78484	1.4786	0.980768	0.966581	-0.117674	-0.369013	0.677063	1.14991	-0.602715	0.718023	0.794891	-0.0494705	1.72802	0.275472	-0.440819	1.24358	1.57703
347	-0.453328	0.419881	1.2426	0.627786	0.428909	1.28515	1.10737	1.88376	-0.518322	0.222359	0.779061	1.50059	0.0537265	-0.27153	-0.14675	347	0.620935	2.35252	1.51448	-0.227863	0.924224	1.34847	0.693326	2.47494	0.120155	0.739022	1.80614	-0.0146694	1.79411	0.781328	0.867234	0.774868	-0.246494	-0.989472	-0.118499	1.06964	1.06727	-0.0577254	1.2685	1.48617	0.375481	0.724889	0.385369	0.257068	0.2231	-0.291505
348	-0.774489	1.72021	-0.234328	0.104636	-0.0505535	0.679307	1.71348	0.127425	-0.624575	1.25534	0.0768134	1.18092	-1.13376	0.64392	0.730585	348	0.288252	1.76616	0.67351	0.396774	1.30678	0.809248	1.41856	0.894423	2.15072	0.844895	1.1482	1.07782	0.648011	1.81458	0.604422	-0.168282	0.771406	0.0946066	0.28842	0.56947	1.98604	-0.202121	0.687702	0.255435	-0.579903	0.204072	0.650686	-0.0830432	-0.221904	0.812854
349	1.65344	0.311999	0.623442	-0.27697	-0.23772	0.540529	2.19462	0.546565	0.379001	1.93791	0.477272	-0.0553046	-0.264249	0.302155	0.981954	349	-0.365581	1.91451	1.47942	-0.717653	1.5613	2.36543	1.64154	2.09618	0.199713	-0.32137	0.653592	1.87494	0.547342	2.477	1.45098	-0.0458591	-0.419031	-0.171193	-0.405027	1.57322	1.40698	-1.82153	0.63069	0.892934	0.849541	0.0494761	0.134045	0.744414	0.211837	0.238714
350	1.28348	0.147569	0.53191	-0.439114	0.598206	-0.104881	-0.327407	0.253384	0.0872259	1.11642	0.263577	1.96181	-0.678856	-0.337384	-0.27183	350	0.663074	1.36735	1.27875	-1.27384	0.891633	0.673879	1.15668	2.83384	1.3083	0.771574	0.0610249	1.49432	0.569185	0.985563	0.28491	-0.939977	0.298598	-0.847972	0.144224	1.10825	0.679688	0.0526086	0.401127	0.0942176	-0.0159465	0.815268	-0.476098	0.702799	0.179668	1.03504
351	0.0429835	0.341775	0.688032	0.1742	1.02228	0.39725	1.16079	1.74562	-1.66318	-1.3241	0.026152	1.30517	0.225791	0.555695	0.355669	351	-0.0853438	1.10063	-0.127956	-0.275135	0.538066	1.1412	1.43171	2.23195	0.193123	0.0630119	-0.320072	2.02666	0.860821	1.60216	0.394659	0.241725	0.643327	0.0229077	0.513443	0.72853	1.48989	-0.199627	1.56392	0.811328	0.272075	1.0486	0.324571	0.217347	0.650667	0.410679
352	-0.260277	0.564143	0.00687026	-0.320465	1.0637	1.24628	1.87241	1.55039	0.579571	1.15125	0.0358938	0.760083	1.20624	0.843918	0.702487	352	-0.728304	1.47372	1.00276	0.529149	0.865433	1.25985	0.61583	1.87112	1.22726	0.850326	0.547714	1.89812	-0.207888	1.45282	1.46763	0.328776	0.111193	0.376956	-0.0738372	1.38253	0.881756	0.271444	-0.136468	-0.0756242	0.916062	0.594609	-0.344837	0.0297119	0.412362	0.180544
353	0.658747	0.696091	0.865211	-1.10595	-0.638651	0.677141	1.45458	0.640827	-0.236774	0.568465	1.79878	2.20827	0.467689	-1.05679	-0.0240592	353	0.816194	0.576939	0.867731	-0.0953883	1.73263	1.09508	0.959085	2.11996	1.41635	0.42984	1.50387	1.55308	1.30978	1.66419	1.44583	0.815239	0.297308	-0.106726	0.288316	1.46304	1.72149	0.657818	0.650577	0.83601	-0.0555136	0.657477	-1.05521	0.248431	0.181982	0.951559
354	0.449127	1.14922	0.237128	1.09198	0.452149	-0.0247326	0.583949	1.61958	-0.462032	0.672073	-0.0850061	1.37211	0.407048	0.9544	-0.32642	354	0.0844579	1.92485	1.32458	-0.903907	-0.0417452	1.33142	0.865979	2.29171	0.404583	-0.0950658	-0.0676734	1.15283	1.08415	1.32899	0.904209	0.582676	1.10284	-0.737454	-0.201466	0.824447	1.54653	-1.92828	0.678514	1.55177	-0.246267	0.794473	-0.0665023	0.439819	2.01111	0.0890194
355	1.10199	1.77515	0.0618829	-0.430254	0.647849	0.786465	1.23047	1.76893	0.956977	0.833773	0.118779	1.67888	0.881419	0.248044	0.613273	355	-0.0757517	0.715441	-1.01158	-0.0219722	0.691685	1.35116	1.03224	1.88954	0.474252	0.728197	0.914956	0.835104	0.807752	0.551287	-0.183394	-0.276283	0.321155	-0.254264	-0.211286	0.79287	0.595138	-1.74915	0.965408	0.471921	0.620788	0.881139	0.0466927	-0.634868	0.698296	0.207194
356	0.946587	-0.0481855	-0.759423	-0.177583	0.357907	0.601106	1.61307	1.74192	0.476262	2.14959	1.16457	1.19758	-0.129371	-0.421365	0.225149	356	0.659154	0.571346	0.0502562	-0.150067	1.72009	0.889942	1.35055	2.81368	0.744107	0.160201	1.20289	1.62301	-0.0543737	0.851704	-0.0187888	0.200212	0.0106136	-0.0183195	-0.0157844	1.2952	2.27379	0.372211	0.697825	0.309405	-0.363359	0.504041	0.378206	0.221121	-0.424136	0.652698
357	0.728801	0.671612	0.0374271	0.383158	0.352836	0.0484741	0.277153	0.625567	0.189446	0.400612	-0.0497301	0.98859	1.12411	-0.283064	-0.665302	357	0.109409	-0.0892834	1.4336	-0.189207	0.991898	1.33074	0.791857	1.13777	0.322256	-0.641237	1.36509	1.56027	0.475795	1.28681	1.70954	-0.498344	1.12003	-0.0679949	0.46299	0.295651	1.03738	0.766594	1.64235	0.971965	-0.263484	1.23087	-0.839064	-0.314194	0.651609	0.71479
358	0.885753	0.416255	-0.273611	-0.36517	1.17748	-0.236378	-0.720753	1.7534	-0.490435	0.416728	-0.178874	0.268967	0.0760527	0.965178	-0.277811	358	1.20299	0.819196	1.52392	-0.398233	1.00645	0.435421	1.25506	1.04959	-0.319523	0.419031	1.461	2.15701	1.35601	1.22294	0.472595	0.318813	1.28743	-0.928595	-0.290665	0.514651	0.882994	0.177356	0.40322	1.78551	-0.565476	-0.263098	0.446993	0.246396	0.47243	-0.371869
359	0.498015	0.61468	-0.515989	0.47023	1.04584	0.357709	-0.588902	0.967621	0.0782427	0.629371	-1.33745	1.19952	-0.112609	0.581047	0.115542	359	0.0876955	-0.151236	1.43837	-0.721614	1.32271	0.493369	1.29516	1.4262	0.828599	-0.80378	1.21772	0.385802	0.00789119	1.94032	1.47128	1.17373	-0.790948	0.452418	-0.0462801	0.184328	1.48213	0.373316	1.40398	0.369353	0.173359	0.72125	-0.591045	0.133415	1.23211	0.482314
360	-0.0229187	1.2384	0.791813	0.20377	0.137457	-1.11798	1.11993	0.374285	0.286521	1.2909	0.167561	0.815243	-1.21683	0.325547	1.07597	360	-0.553178	0.0235687	0.600602	0.999303	1.24465	0.58555	1.654	1.36631	1.54398	-0.429782	1.22632	2.06347	1.07108	1.876	1.35544	0.334142	-0.464501	-0.29395	0.913536	0.302201	0.546715	0.216963	0.691995	0.744104	-0.111349	-0.564512	0.347337	0.780753	0.98037	0.309563
361	0.488479	1.4624	-0.0998897	0.933318	0.886712	0.551622	1.4085	-0.0793164	-0.622527	-0.123505	0.0018577	0.136107	-0.148324	0.531868	0.206427	361	0.107485	1.44262	0.954932	-1.91065	0.857441	0.221474	1.24915	1.09694	0.421259	0.207486	0.279471	2.54399	0.29268	1.45776	0.191859	-0.29406	-1.11445	0.143036	0.960583	0.231297	1.2347	0.19938	1.2076	0.662589	0.00298023	-0.660445	0.0846048	-0.454666	1.10311	0.604233
362	0.795706	0.512408	1.39079	0.347028	0.0916122	0.503202	0.826675	1.43138	-1.09403	-0.215522	0.811025	1.79884	0.191088	0.782502	0.115888	362	-1.36227	1.23655	1.30462	0.225723	0.052291	0.34393	2.15798	1.00832	0.446848	0.296903	-0.234193	0.841791	0.92555	1.14667	0.668852	1.01663	0.929386	0.687446	-0.121593	0.988613	1.10506	0.720812	0.45412	1.00928	0.829485	0.436775	-0.853744	0.721248	-0.00635478	0.494228
363	1.60119	1.21639	-0.189594	0.655989	0.786344	-0.105463	0.0532342	0.783497	-0.469783	-0.111328	0.922087	1.7568	0.453373	0.956932	0.625961	363	0.173939	1.50311	1.41606	0.879794	1.51632	1.23095	0.425536	1.45213	1.11449	-0.0628108	0.399498	0.920228	0.0897437	1.70237	0.998104	0.153047	0.615892	-0.670311	0.614594	0.264963	0.714441	-0.675373	0.522008	2.1242	-1.0771	0.946729	-0.211462	0.813609	0.773872	0.9988
364	0.493566	-0.74954	-0.111855	0.229372	0.759463	0.490083	1.13148	1.05721	-0.799439	-0.198602	0.27914	1.45086	0.529534	-0.109284	0.698576	364	0.488475	0.0142338	0.601569	0.732007	1.35841	1.08118	0.951667	1.72038	1.13072	0.502121	1.59005	1.25992	-0.740043	1.71597	-0.148854	0.636226	0.502415	-0.418807	0.558102	0.744973	0.841843	0.154389	0.224227	0.287447	0.196145	0.656254	-0.196082	0.590607	1.57505	1.16617
365	-0.110358	0.458022	-0.654373	-0.0932764	-0.0784694	1.17987	1.8259	0.483626	-0.0785881	0.434449	1.09266	0.77487	0.669016	-0.562288	-0.059484	365	-0.458153	1.81902	0.487304	-0.309632	0.38295	1.43908	0.810114	1.22358	0.2242	0.249124	0.198985	0.93946	0.474318	0.330129	0.476997	-0.167108	0.196646	0.186547	0.0201889	1.2258	1.83011	-0.575491	0.794339	1.29808	-0.0567573	0.63112	0.0809348	0.909223	0.317008	0.31963
366	1.53538	0.683688	1.83677	0.635667	0.926543	0.665006	-0.405422	1.14182	0.413223	1.63188	-2.46636	0.586086	0.59597	-0.0126901	0.0401295	366	-0.194522	0.368177	0.906212	-0.189621	2.14142	-0.44147	1.15661	0.746253	1.42205	0.334364	0.713329	0.720798	1.42083	0.670586	0.501382	0.0667821	-0.111456	0.159954	-1.47796	1.16307	1.05761	0.42083	0.423295	1.09669	-0.272722	0.483155	-0.646289	0.546882	0.357496	1.38955
367	-0.0583337	1.07831	0.406616	-0.24761	-0.378807	-0.479732	-0.916666	1.56896	0.928941	1.81544	0.465369	1.63887	-0.0786322	0.228295	0.473284	367	-0.675115	-0.110679	-0.145946	-0.626271	1.21452	0.977678	1.30757	0.571846	0.535231	-0.196315	0.39494	1.29744	0.446409	1.40127	0.890643	0.730883	0.512312	-0.372875	0.323685	1.36369	0.517777	-2.26497	0.700678	1.46908	-0.439588	0.95071	-1.15317	0.132725	0.87542	0.716497
368	-1.15361	0.394664	-0.225847	0.333272	-0.295881	0.0926524	0.761267	0.95321	-0.16387	1.37272	0.229003	0.782288	-0.102019	0.106736	-0.00303941	368	-0.584303	0.581192	2.02105	0.0776425	1.07189	0.236025	1.18588	2.1221	-1.54449	1.03098	0.569857	0.742138	-0.69306	0.857608	0.05809	0.389271	-1.15722	-0.586669	0.579122	-0.0291115	1.41033	0.021364	0.691883	0.735126	0.790933	1.5274	-1.43767	0.438202	0.642594	-0.51278
369	1.72766	1.08682	0.683833	0.285376	1.25472	0.227297	1.51862	0.956941	0.37323	1.08884	1.13688	1.79461	-0.545959	0.562847	-0.22424	369	0.228747	1.13532	1.11638	-0.921847	1.06676	0.268549	0.641073	2.63802	0.410778	0.0442522	0.0262323	1.43256	1.02823	2.25389	0.111728	-0.54327	0.708642	-0.0353099	0.551337	-0.15535	0.332711	-1.36768	0.429895	0.819301	-0.587299	0.500339	-0.0874459	0.504582	0.352625	0.519123
370	0.670074	-0.00893335	-0.671874	-0.381584	-0.103837	0.269465	0.190071	0.846166	-0.566225	0.309488	0.455319	1.25415	-0.161452	-0.786139	0.207361	370	0.545381	0.902398	1.15896	-0.810245	2.32411	1.6386	-0.513644	1.57025	0.260659	1.57937	0.456834	2.0056	0.43468	0.879087	0.15165	-0.302667	0.255072	-0.539039	0.0827068	0.00311478	1.03598	-0.223076	0.715666	-0.525367	1.00836	-0.0333317	-0.370554	-1.32903	0.952564	0.401163
371	-0.328953	1.39944	0.0351058	0.307048	-0.171437	0.246641	0.297022	0.529356	1.11518	1.15772	-0.677361	1.11137	0.131612	0.0407422	-0.000413457	371	-0.0683654	0.336585	1.31937	0.232731	1.38435	0.195532	0.813089	1.01652	0.0480389	0.823187	-1.14339	2.42276	1.3698	1.73556	0.250965	-0.0927811	-0.130002	-0.230057	-0.125095	-0.435017	0.890295	-0.00467242	-0.0247143	0.471414	0.655802	0.419621	-0.152548	0.166198	0.524047	-0.210097
372	-0.554714	0.301015	0.347036	-0.367268	-0.0725908	0.361684	0.385617	2.33215	-0.0586315	-0.323753	0.613149	1.48155	1.35685	0.560552	0.0758706	372	-0.718192	0.559255	0.136755	0.0266846	1.36007	0.503987	1.33935	1.63477	-1.0571	0.706968	0.897372	1.83566	0.713643	1.31818	0.951633	0.78298	-0.715782	-0.0268404	0.502301	0.749666	0.851199	0.242513	1.70318	0.940182	-0.0717392	-0.99055	-0.0461804	-0.176953	1.0403	0.639385
373	0.517205	0.165498	0.992561	0.0857606	0.604098	-0.541596	1.16451	-0.0342822	-0.944393	0.825192	1.00517	1.06928	0.585676	0.249863	0.00395817	373	-0.250363	0.679271	0.673029	0.22388	1.65094	1.13234	0.235918	2.4751	0.0783158	-0.31482	0.897655	0.841778	1.10466	0.745559	1.36156	0.0950983	-0.187543	-1.45543	0.0785904	0.344123	1.08675	1.41983	-0.15346	1.43218	-0.0593018	0.459857	-0.380864	-0.244305	-0.050074	0.355725
374	-1.68579	0.315516	-0.365696	0.691869	0.329749	0.478582	1.24806	1.60719	0.261499	-0.2896	0.142096	1.33085	1.06192	1.04642	0.80623	374	0.536502	0.215476	0.940793	0.823169	1.31258	1.09625	0.769043	1.32086	-0.15886	0.677968	0.268264	1.75365	0.53877	0.912013	-0.197884	-0.689694	0.949316	0.30507	-0.295665	-0.673551	1.44403	-0.444428	0.660468	0.436678	-0.406985	2.59145	0.0653254	0.901348	1.04935	0.922827
375	0.214271	-0.0198301	1.10427	0.543024	0.743216	-0.417516	1.11033	0.285975	-1.44392	0.897874	-0.0150274	0.541725	0.476438	-0.1693	0.34732	375	-0.837867	0.493731	0.673783	-0.57091	1.5117	-0.379016	1.266	1.50991	0.309159	0.246929	-0.207135	0.834286	0.341905	1.82018	0.492208	-0.641337	-0.0643433	0.331931	-0.0806216	1.10314	0.70498	0.821149	0.667208	0.858472	-1.05154	1.26954	-0.400368	0.134354	-2.1732	0.380822
376	0.0733323	0.252592	-0.66143	0.405523	-0.189336	-0.412623	0.886137	0.302099	0.550478	0.308916	0.0268214	0.944291	-1.08912	1.39842	0.280831	376	0.0432504	-0.191274	0.891227	0.253571	1.59397	1.48161	-0.0140168	1.21479	0.88278	0.821318	-0.069325	1.45813	-0.0304542	0.0894483	0.99709	-0.484234	0.366995	-0.124182	0.363245	0.319287	1.06537	1.2048	-0.0134206	0.802002	-0.96045	-0.063343	0.220303	-0.242883	-0.40616	0.351707
377	-1.83208	-0.411035	0.552568	0.287351	-0.0274964	0.186417	1.41106	2.3409	0.750597	-0.0524224	0.509097	1.63863	1.20788	-0.359083	0.548861	377	-0.267245	1.32514	0.83551	0.0550341	1.23737	0.507768	0.151168	2.12081	-0.505162	0.571603	1.25215	0.34377	0.774643	0.354943	-0.00402062	0.23749	-0.599394	0.536789	0.116089	0.480938	1.34737	-0.977645	0.274824	0.176574	-0.862569	1.42382	-0.697222	-0.401653	0.551556	0.630746
378	0.0754055	0.129446	0.673927	-0.229075	0.31485	-1.20906	0.45142	1.61532	0.506524	0.306865	0.711127	0.139102	0.686675	-0.18825	0.303017	378	-0.528075	0.911884	1.25903	0.718128	0.742245	0.927397	0.368561	2.79197	-0.320863	0.669496	0.939606	2.4047	1.0826	1.45676	-0.401643	-0.658694	-0.291827	-0.420228	-0.410062	0.201941	0.462793	-0.480768	0.625595	-0.350833	0.273461	1.14263	0.333094	-0.196236	0.87737	0.179788
379	-0.334413	0.370618	1.05528	0.094266	0.23562	-0.325246	1.32466	0.530603	0.489651	0.960562	1.54057	-0.00702246	0.991744	-0.18756	-0.068366	379	-0.278927	0.273797	1.15508	-0.11312	1.51352	0.809859	0.990688	1.10341	-0.137456	0.828546	0.218438	1.67752	1.57966	0.895688	0.573234	0.495645	0.453688	-0.497674	0.425365	0.970722	1.02258	-1.21189	0.552721	-0.0614754	-0.97442	0.507728	1.01969	0.68674	0.380929	0.73155
380	0.482974	0.752438	-0.723974	0.500731	0.235691	0.568835	0.731944	-0.813307	1.40577	1.26775	0.41921	0.187205	-1.19877	-1.85741	0.0749827	380	-0.0195263	0.181124	0.347158	0.992686	0.621649	0.259537	-0.0636229	1.37351	0.531766	-0.80467	-0.0408678	1.74534	-0.45525	0.169668	-0.324703	-0.103924	-0.422896	0.0221745	0.699482	0.149996	1.11633	-0.474679	0.490017	0.998997	-0.453696	1.57611	1.09747	0.0963081	-0.498586	0.504999
381	1.20669	1.07317	0.460962	-0.0394201	-0.880632	0.860484	0.976233	0.553313	-0.337595	0.268117	-0.375886	0.165308	0.959154	-0.766033	0.0992995	381	1.05456	1.4099	1.91082	0.705082	1.93495	-0.724577	0.331066	2.94323	0.810539	0.263546	0.874906	1.43922	0.39486	0.888252	-0.107489	0.173375	1.91716	0.502806	0.605583	-0.367104	0.679402	0.316976	0.263838	0.0616895	-1.19699	0.519112	0.169977	-0.156203	1.1346	0.297177
382	-0.792475	-0.516614	-0.150934	0.32433	0.438672	0.71014	1.41226	-0.44132	-0.154257	-0.750635	-0.352236	0.904865	-0.275093	-0.275492	0.0987874	382	-0.069673	1.24231	0.323473	-0.446055	2.10578	0.692948	0.673033	2.13156	-0.0782596	0.837168	-0.210867	0.347338	0.355236	1.18776	1.08416	1.38701	-0.0522599	-0.884962	0.362234	-0.127281	0.787451	1.6125	0.447787	1.08541	0.616472	1.22691	0.514352	-0.58408	-0.332779	-0.337043
383	-0.0625117	1.04778	-0.161782	-0.314321	0.549629	0.204686	-0.215892	0.86531	0.478802	-0.260089	0.334878	0.262356	-0.236845	-0.435051	-0.330029	383	-0.209935	1.16167	0.837085	0.809636	0.36712	1.0804	0.965825	1.916	0.47538	0.635088	-0.63695	1.75239	0.265397	0.394205	-0.374014	1.1984	-0.775356	0.323771	0.264491	0.530514	0.597716	-0.985831	0.506933	0.440305	-0.531473	1.49685	0.679277	-0.0480424	-0.0251354	-0.375114
384	-0.434271	0.710378	0.371714	-0.274935	-0.0836467	-1.5022	0.532875	1.48684	-1.18994	0.922637	-0.60762	-0.20604	0.50788	0.299428	-0.436734	384	0.883617	0.590213	0.214162	0.540202	1.20456	1.02243	0.0986797	2.00482	-1.19656	0.32599	0.304925	0.574349	0.199253	0.5387	-0.195795	0.144302	2.32634	-1.00739	0.470894	0.753092	0.600877	-1.02227	1.01516	0.647726	0.697805	1.07014	0.289448	0.356473	0.089206	0.67952
385	1.1644	1.93282	0.0987461	0.388524	0.457093	0.926997	0.626091	-0.050278	-0.419688	0.582772	0.731625	-0.692025	-0.239503	-0.216791	0.459305	385	-0.691641	1.48575	1.55915	-0.194299	0.961726	1.0499	0.583046	1.48054	1.07945	0.456717	0.183775	-0.0627586	1.25523	0.0514447	0.59701	-0.135248	-0.514647	-0.0223099	0.107864	-0.019052	1.20183	0.190837	0.661817	0.559597	-0.305021	0.358902	0.723038	-0.0843554	1.08566	0.90226
386	0.0792847	1.52897	1.06954	-0.027377	-0.242232	1.42508	0.361913	-0.29909	-0.49867	0.836591	0.0466437	0.911424	-0.581107	-0.196938	-0.0753464	386	0.207493	0.30751	1.94106	-0.28388	1.3528	0.684788	0.463489	1.57937	0.185583	1.35093	-0.426696	0.839858	0.952728	1.22479	0.718751	0.462271	-0.0519583	0.303418	-0.260454	0.92952	1.72569	-0.0369094	0.497396	-0.197248	0.228254	0.51722	-1.94394	0.24513	-0.282161	-0.0193563
387	-0.391286	1.25086	0.618843	-0.184	0.89039	0.231212	0.776559	1.46527	-1.10667	0.434305	0.385041	0.268912	-0.591785	0.294579	0.316747	387	0.441086	1.48903	-0.79427	0.148252	1.32619	0.63383	0.210391	1.38312	0.830599	-0.397142	0.519421	1.82619	0.712866	0.523211	0.730491	0.331997	0.548886	-0.583909	-0.292161	0.0486267	1.20401	-0.425692	1.00947	0.934554	-0.772365	-0.274624	0.8432	-0.183314	0.721167	-0.699291
388	0.938023	0.968394	0.489422	-0.154056	-0.415708	0.507441	1.54152	-0.0161911	-1.09668	-0.561061	-2.05009	-0.483851	0.748853	-0.599289	0.428818	388	-0.565961	0.806606	1.59955	-0.164213	1.13895	0.235093	0.842114	0.349571	-0.581111	0.699885	0.602685	1.64777	1.19497	0.970644	0.519149	0.354724	0.059783	-0.227428	-1.06711	0.279519	0.631725	-0.282567	0.476904	0.658715	-1.52647	0.433719	-0.375422	0.0665426	-0.806847	0.386412
389	-0.339705	1.47405	1.90694	0.0255638	0.478729	0.657876	1.05501	1.34098	-0.352597	0.79395	-2.3553	1.20103	-0.382734	0.494091	-0.0142546	389	0.00969528	0.732788	1.11755	-0.104617	-0.312323	1.42093	0.0386381	0.336397	1.09446	0.164926	0.503574	0.218436	0.637789	1.22677	-0.591545	0.342054	-0.0910842	0.0236797	0.41862	0.167235	1.24893	-1.10621	1.01379	0.579913	0.51806	0.209928	1.06062	-1.57274	0.188331	1.22128
390	0.912159	0.181	1.46121	-0.646214	-0.0484026	0.405347	-0.129229	2.98157	0.0376368	0.94245	0.377338	0.101725	0.269211	0.238781	0.598746	390	0.335264	2.14598	1.82158	-0.618796	1.64523	1.20368	1.23849	0.669896	0.37983	-0.0711307	0.25431	0.589146	0.652893	0.55314	0.252922	0.567679	0.817366	1.2183	0.146134	0.147195	1.26283	0.657963	0.367889	0.402112	-0.74993	-0.199345	0.309805	-0.199299	-0.0314654	1.25498
391	-0.202454	0.121876	1.38288	-0.221351	-0.0449878	-0.946062	0.483093	1.7622	0.140992	0.480411	0.620566	0.822575	-1.23075	0.384259	0.347857	391	0.00811932	1.38118	1.032	-0.189875	0.142951	0.790961	0.385928	1.79069	-0.179485	-0.00142724	-0.945289	1.7036	-0.340612	0.356285	0.67486	-0.320923	-0.093358	-0.915473	-0.268183	0.326774	1.78584	-0.765054	1.31161	0.223447	-0.0222601	0.535244	0.948478	-0.860371	0.143018	0.695627
392	0.121137	0.104542	0.379904	-0.698587	0.349244	-0.466936	0.27913	1.23175	-0.904319	-0.158765	0.205872	0.386346	-0.0384732	0.786981	0.292767	392	0.587687	1.8942	0.905025	-0.178076	0.397913	0.369416	0.911042	0.264685	0.376768	0.370596	1.08838	0.822343	0.353107	0.62959	-0.0569128	0.111892	-0.474599	-0.944594	0.503883	0.930485	0.817831	-0.440168	0.27042	0.238333	-1.24308	0.289032	-0.0102504	-1.01066	0.564303	0.469184
393	-0.229507	-0.855428	0.579833	-0.102368	1.01577	0.301933	0.759972	0.632155	0.550316	0.446686	0.213781	1.60622	-0.214162	-0.831623	0.213518	393	-0.312433	1.31124	0.867118	-0.73094	2.5365	-0.229935	1.03623	1.1298	-0.715998	-0.033734	1.07574	0.18899	0.629519	0.321275	0.0392686	0.0250047	-0.218568	-0.0407929	-0.135311	0.563144	0.747578	1.14888	0.535559	1.29312	-0.0234422	0.972547	-0.247252	-0.529987	0.245333	-0.207271
394	0.834192	-0.172555	0.561484	-0.802181	0.265371	0.561955	0.884297	0.58713	0.468215	0.451258	0.193359	0.0834321	1.43072	0.0526424	0.124025	394	0.329959	0.397208	0.554944	-0.0898915	-0.616504	0.0217137	-0.185601	1.07929	0.0750817	-0.782294	1.1101	1.41705	-0.355895	-0.311206	0.101897	0.237788	-0.769854	0.10522	-0.577141	0.172718	0.448048	0.0797999	-0.0762179	0.698409	0.265172	0.0870472	0.663331	0.0960708	-0.446239	0.97986
395	-0.870393	0.275889	0.51631	0.439578	0.714176	0.608564	0.718187	0.24361	0.644731	0.270689	0.549614	1.10827	0.873905	0.139389	-0.0860691	395	-0.121481	1.43069	1.61629	-0.977581	1.63952	0.117683	0.71516	2.20722	0.75079	0.469773	0.687756	1.41324	1.29647	1.33531	-0.893619	0.554458	0.0800976	-0.416334	-0.347836	-0.0595503	0.340533	-0.0443819	0.774053	0.316049	0.248277	-0.315572	-0.109818	-0.586383	0.880589	-0.07257
396	0.379537	1.28675	0.406649	-0.659474	0.504835	0.538219	1.05346	-0.424977	0.0327542	-0.231675	0.0271799	0.797182	0.448994	-0.0942138	-0.383923	396	-0.0717961	0.982668	0.498425	-0.385257	0.937683	-0.608952	1.00105	1.95594	-0.365712	-0.605544	0.405836	0.209975	0.378155	0.308728	1.16828	0.494948	0.1951	-0.223834	0.750043	0.144075	0.734278	-0.441615	0.282362	0.278336	-0.436972	0.252501	-0.223873	-0.283183	0.514565	-0.463277
397	-0.746615	0.834325	0.787122	0.441223	-0.0306236	0.557516	-0.652232	0.960083	1.51828	0.512629	0.0449976	0.0984265	-0.285165	-0.0353572	-0.161468	397	0.133023	1.35723	0.400284	0.240083	1.34376	-0.354397	0.155002	1.10373	-0.331705	0.194623	1.48637	1.07965	0.0227373	-0.128783	0.509443	0.407779	-1.60755	-0.525785	0.371845	1.39843	0.811495	-0.238043	0.465783	0.190857	-1.20373	1.01797	-0.31625	-0.953901	0.385727	0.284436
398	0.648005	0.742196	-0.257414	1.45153	-0.705275	0.0322005	0.0852898	-1.20142	1.05347	0.20615	0.424209	-0.30891	-0.080902	0.284291	-0.0444872	398	0.817373	1.14189	1.3674	-0.472197	0.312772	-0.247146	0.702286	1.1401	1.37136	0.83915	0.0536353	0.408364	0.308465	-0.506731	-0.291202	0.728599	-0.607546	0.782611	0.646419	0.353134	-0.139625	-0.727067	-0.220472	0.74458	0.171004	0.756143	0.434871	-0.527512	0.295909	-0.365916
399	1.42022	1.24349	-0.0405623	-0.0775533	-0.689929	0.455263	0.219742	0.108009	-1.2093	-0.106617	-0.294375	1.28591	0.401168	-0.433383	-0.18163	399	-0.104352	1.40202	0.552624	0.518599	0.809413	-0.535273	0.648354	1.01617	-0.612485	-0.0389274	1.45045	0.989894	-0.0995479	0.914879	0.218684	-0.206265	-1.28367	0.116767	-0.00570435	0.109445	0.885583	-0.424351	0.89216	0.00928911	-0.31133	-0.0508949	-0.484707	-0.574471	-1.19468	-0.225564
400	0.375664	-0.851593	0.0374468	0.849477	-0.300912	1.34923	1.19915	0.172484	-0.7915	0.337604	0.795228	-0.0270053	0.051654	-0.643258	0.024907	400	0.623846	0.0469908	0.535097	-0.497261	0.546039	0.224597	0.0796499	1.08608	0.825849	-0.389667	-0.930756	0.588561	-0.418286	1.34115	-0.246308	0.866614	-0.778174	-0.529804	0.391879	0.607124	0.853436	-0.0977101	1.27901	-0.0655185	0.843194	0.67261	0.387349	0.262626	0.25479	-0.0604097
401	0.588532	0.159999	0.0500179	-0.268438	0.253254	-0.0524417	0.401004	-0.0908176	0.339229	-0.59407	0.752078	-0.573696	0.0267485	0.136719	0.240413	401	0.0907819	0.249996	0.707606	-0.311546	0.662615	0.280053	0.609099	0.902315	0.895283	-0.179223	0.929163	1.381	-0.260582	0.939611	-0.0418591	-0.646294	-0.0695849	-0.844441	-1.11391	-0.277138	0.942316	-0.306265	0.97113	-0.586879	0.15654	-0.247057	-0.500858	0.0329784	1.05775	0.13245
402	0.0566085	0.0263765	0.843628	0.659869	-0.452416	-0.4507	0.700233	-0.389673	-1.2607	-0.366017	0.389648	1.35725	-1.22308	0.145567	-0.00944896	402	0.283421	-0.674148	1.51443	0.271202	0.138425	-0.368659	-0.0402398	0.570298	0.158478	0.387779	0.280888	1.12808	0.998268	0.0428814	0.77268	-0.434608	-0.0627358	0.00574431	0.565277	0.516219	0.783543	1.03778	0.889683	-0.944909	-0.273505	0.883419	0.454974	0.308536	-1.45039	0.183067
403	0.505378	-0.133661	-0.204259	0.0669545	0.706117	-0.00169116	-0.0207454	0.59375	-0.35412	1.18771	0.601448	-0.0212364	0.319571	0.264741	0.117096	403	0.79475	-0.0861894	-0.270763	-0.0250954	0.666791	-0.513688	0.391371	0.238005	0.772374	-0.643612	0.194808	1.7608	0.0959771	0.151758	-0.709635	0.110314	0.500513	-0.853038	-0.0912966	0.0291198	1.40067	0.449248	1.06039	-0.111655	-0.0466223	0.0885969	0.537259	-0.191654	-0.394993	0.0671681
404	0.975618	-0.906212	0.867518	0.263107	-0.499232	-0.823478	-0.953588	0.365463	-0.209354	0.714617	0.4101	1.00468	1.38051	-0.023991	-0.000216914	404	-0.479509	0.225595	0.847373	0.897268	0.610102	-0.429851	-0.990959	1.13402	0.182129	-1.18377	0.840804	0.649321	0.138392	0.678709	-0.282904	0.371696	-0.18717	-1.71677	0.602424	0.288016	1.72584	1.01391	0.134207	-0.153642	-0.964675	0.73204	-0.947362	0.4472	-0.286625	0.608945
405	-1.30285	-0.0695904	0.428297	0.188255	0.0843522	-0.369204	0.796652	-3.36383	0.593988	0.696859	-1.06245	-0.738245	-0.194966	0.0491881	-0.249578	405	-1.21006	1.14975	0.977576	0.0346665	0.986906	-0.139803	0.00475595	1.66856	1.62785	0.535084	1.10181	1.59437	0.969087	0.367973	-0.018511	-0.499248	-0.524462	-0.613769	-0.983248	-0.173833	1.29124	0.0779976	0.383743	0.0865171	-0.102434	0.0448435	0.324158	-0.953527	0.31757	-0.988837
406	0.654272	0.511174	0.0585176	-0.0364033	0.559193	0.0720153	0.312078	0.47662	-0.734315	0.0336878	0.450546	0.823936	0.170485	-0.164615	-0.0643426	406	-0.213605	1.0162	0.857272	-0.121093	0.267944	0.104932	-0.326848	1.32041	0.435015	-0.495513	0.272408	0.371134	0.0995343	0.982889	0.217145	-0.378685	-0.198823	-0.131836	-0.124062	0.687756	0.507946	-0.195173	-0.435634	-0.0934216	-0.128201	1.38299	0.0455211	-0.641714	-0.266793	0.781257
407	0.044669	0.252908	0.749801	0.226533	-0.00439085	0.699616	0.0296049	1.12693	-0.505867	0.33872	-0.371452	0.850255	0.677179	-1.07064	-0.38261	407	0.592035	0.618128	1.9094	-0.339865	0.525585	0.499598	-0.475639	1.559	-0.159221	-1.29194	0.100796	1.37365	1.11167	0.270647	0.178878	1.29525	-1.01742	-1.46868	-0.761197	-0.193536	0.865236	0.460141	0.244183	-0.231311	-0.596612	0.791841	0.426117	-0.196642	0.911617	-0.144376
408	1.04649	-0.885455	0.00121214	-0.423463	0.0928783	0.367176	1.5477	0.841882	-1.42894	0.674231	-2.46046	0.433118	0.670914	-0.2359	0.371868	408	-0.151552	-0.208552	0.841139	0.300135	0.256597	0.149038	-0.227992	1.72263	0.669762	0.183936	0.448479	-0.17918	1.07822	0.257963	0.314879	-0.215354	0.883287	1.07885	0.102084	-0.00808266	0.00342643	-0.625427	0.70926	0.0769952	0.750882	0.938065	1.07907	-0.789284	0.254789	-0.245232
409	-1.19132	-0.764668	-0.24756	-0.453982	-0.697801	-0.374373	0.76913	0.600339	0.278292	-0.681031	-0.154326	-0.16021	0.00203157	0.535567	0.143318	409	0.586766	0.746149	-0.265098	0.950782	0.0555799	-0.546086	0.617619	0.966422	-0.168531	-0.328634	1.00873	0.282719	1.5132	0.849547	-0.0238489	0.68669	-0.296135	-0.400104	0.199821	-0.288563	1.26983	-0.331072	0.0634053	0.695017	1.11795	0.384673	-0.00504149	-0.269399	0.492951	-0.285662
410	-0.740659	-0.550438	1.04159	0.184933	0.634681	-0.929484	1.02578	1.15445	0.354038	-0.0462737	1.08738	0.470956	-0.557655	-0.17097	-0.00818895	410	-0.365834	1.32376	1.45621	-1.78527	0.0142732	0.621086	1.53262	-0.165163	-0.485417	0.340194	-0.145205	0.443657	0.277933	0.773204	-0.189906	0.307839	0.73738	0.120468	0.190937	0.359057	0.697605	0.188488	-0.050593	-0.000456712	-1.85158	0.0371652	0.828227	-1.58307	-0.214033	0.589014
411	-0.993928	1.14999	0.594044	-0.567662	0.964748	0.551152	-0.706212	1.25642	0.0197711	-0.0560317	0.916334	0.698721	0.0622991	0.421269	-0.0789339	411	-0.0763197	0.793306	1.09888	0.997102	0.203181	0.473311	-0.943682	0.853142	1.46607	-0.261376	0.622441	0.365302	-0.519896	0.158496	0.318914	-0.29757	-1.55793	-0.168875	0.374547	0.61849	0.605017	0.544189	0.142059	0.169309	-0.538555	0.0727809	0.37719	-0.373006	0.133042	0.304206
412	0.758926	0.376138	-0.0623834	0.666416	1.02184	-0.0539149	0.109872	0.935012	-1.07366	1.6027	0.0638172	0.326188	1.60535	0.506904	-0.272943	412	-0.274274	1.28158	1.29259	0.405461	-0.366568	-0.0109532	-0.232202	0.997141	0.489734	-0.0960948	1.01486	-0.782024	0.907065	0.360458	0.292344	0.31466	-1.059	0.379188	-0.131345	0.0254335	0.966104	0.830026	-1.72739	0.683754	0.291077	-0.906572	0.968228	0.77888	0.645498	0.602919
413	0.487837	0.388626	0.598603	-0.212189	-0.014724	-0.471211	1.22087	0.0634036	1.68005	0.500485	-1.06118	-0.194022	-0.206317	-0.438671	-0.591738	413	-0.853064	0.755825	2.07273	-0.826798	0.691815	0.125379	-1.20575	0.287397	0.526356	-0.934847	1.1833	0.322662	1.0634	0.565442	-0.0781215	-0.346174	0.478483	-1.03751	0.233698	0.339642	-0.120244	-1.25911	1.03696	0.317705	-0.366245	0.881115	0.558539	-0.921014	-0.120587	-0.843264
414	1.86334	-0.30874	0.347619	-0.571837	-1.85147	-1.03393	1.22482	0.385233	-0.247291	-0.61473	-0.538421	0.0338092	-0.340497	0.0232653	0.302499	414	-0.254204	0.144582	0.43626	-0.416631	0.564449	-0.782266	0.741185	0.880749	-0.831982	0.376449	0.272914	0.69041	-0.585829	0.582883	0.570141	-0.181992	-0.357609	0.178748	-0.423632	0.154902	0.324253	0.222945	-0.0892552	-0.122013	0.267655	-1.0449	1.23155	0.529843	0.514928	0.664605
415	-0.786994	0.850745	1.77907	-0.66363	0.0134985	-0.532282	-0.208155	0.701857	0.0422241	-0.762634	0.67529	0.168587	0.114583	-0.348356	0.211725	415	-0.0794612	1.71861	1.81957	0.527202	0.552171	0.253611	-0.903507	-0.49127	-1.25346	-0.0788759	0.891343	0.119625	-0.216308	-0.551097	0.844354	0.719951	-0.0498202	0.30783	-0.464251	-0.84811	-0.0562296	0.218932	0.227874	-0.932026	-0.850725	0.53034	-0.834492	0.286005	0.00729826	0.884725
416	-1.96651	-0.0204868	-0.573949	0.14913	1.3573	0.0137185	-0.216411	0.0508477	-1.1841	0.266131	0.290961	0.650604	-0.792949	0.0532	0.364817	416	0.500062	0.622813	0.756127	-0.0628235	-0.450827	-0.493274	0.00630397	0.972219	-0.0069465	-1.79304	0.630319	0.371252	-1.22767	1.0206	0.67697	0.102806	-1.08672	0.403637	-0.759514	0.53809	0.705803	-1.2485	-0.629047	-0.0889475	-0.54775	1.11983	-0.964311	-0.124196	-0.20705	0.0771604
417	-0.556114	-0.39964	0.0645245	0.0891311	-0.692395	0.113749	-1.17339	-0.666925	0.504674	0.171593	-0.704471	0.519067	0.517858	-0.401151	-0.108488	417	0.193488	0.577373	1.19518	-0.61536	1.03481	0.561589	-0.252394	0.304542	-0.0310791	-0.396085	-0.0373633	0.550278	0.676825	-0.118194	1.03139	-0.585189	0.527006	-0.147676	-0.200758	-0.101598	-0.37624	0.338425	1.29728	-0.857406	0.0874835	-0.0157999	-0.751661	-0.00303767	0.898263	-0.628999
418	0.48991	0.745421	0.404992	0.0224116	-0.865911	0.379608	0.0555958	1.41599	-1.38047	0.484867	-0.645232	-1.67512	-0.459958	-0.0660328	0.324539	418	0.199927	0.769477	1.0828	-0.332236	1.13664	-0.365631	0.48937	1.27623	-0.459327	-0.195332	0.243358	0.206995	-1.44056	-0.227557	1.01491	0.0877565	-0.443099	0.170899	0.0274329	-0.260861	-0.37359	0.430779	0.650941	0.288519	-0.738029	-0.288248	0.326875	-0.120973	-0.144306	0.417049
419	-0.372605	-0.28727	-0.161106	-0.260514	0.138338	-0.965877	0.65854	-0.0944052	-0.340378	0.364408	-0.567721	0.698872	0.235175	0.233087	0.0869901	419	-0.40055	0.382086	1.89675	0.174958	0.579574	-0.468291	-0.864485	-0.301136	0.347092	-1.17882	0.174945	1.06785	0.886725	0.268489	0.203209	1.02733	-0.42222	0.496862	-0.270455	0.311049	-0.0959042	0.745172	0.747508	-0.36782	-0.469822	-0.202814	-0.665074	-0.391879	1.16847	-0.0397438
420	0.290008	0.473322	0.275837	0.268119	0.141477	-0.815206	-0.364607	0.901799	-0.353223	0.872172	-0.467478	0.309589	0.412231	-0.177659	0.0375703	420	-0.647205	0.628458	0.550321	1.22443	-0.269258	0.26832	-0.511817	1.29054	-0.44182	0.723846	-0.938706	-0.130776	0.669148	1.12385	-0.116593	0.282187	-0.472098	0.437444	-0.369587	-0.122934	0.410844	0.104196	0.250517	-0.312546	0.219833	-0.0258893	-1.11906	0.309459	0.36898	0.662907
421	-0.836394	1.34804	0.357554	0.0906853	0.0574689	0.167966	1.04682	-0.474388	-0.0293183	-0.334934	-0.731617	-0.186926	0.323562	0.248781	1.44618	421	0.15203	0.97216	-0.182649	0.630749	-0.285893	-0.455266	0.369405	0.0755938	0.170674	-0.0347956	0.334786	0.781739	-0.0251432	-0.384566	0.521046	0.418236	-0.491547	-0.547308	0.00714148	-0.917625	0.431735	0.79608	0.506617	-0.763141	0.0393336	-1.09032	-0.861449	0.255965	0.246983	0.23341
422	1.49614	0.349467	-0.0317727	-0.132226	0.133456	0.0493913	-1.07224	1.46959	-1.20725	-0.813657	0.895671	-0.026773	-0.33211	-0.044923	-0.323037	422	-0.0688037	0.892357	1.00006	-1.92478	0.144284	-0.578549	0.0121326	1.01215	-0.0873253	-0.332499	1.12402	0.813527	0.121183	-0.295364	-0.313909	-0.0127575	-0.00772525	-0.0246698	-0.914527	0.374469	0.491333	0.279637	0.691309	-0.727519	0.632276	-0.063808	-0.793832	0.0956413	-0.241674	-0.589637
423	0.424286	0.0593402	-0.29304	0.825737	0.161836	0.19729	0.417261	1.66193	-0.0418161	0.771169	-0.706366	0.246918	0.586256	0.294358	-0.316422	423	0.508519	0.718072	1.94085	-0.931054	0.288275	0.0452078	0.100704	0.715644	0.236894	0.716064	-0.271311	0.214401	-1.02617	0.306108	0.809084	0.0252383	-0.054702	-0.0625181	-0.300649	-0.231692	0.288352	0.2978	0.267133	0.668399	-0.378174	-0.146236	-0.992624	0.584976	0.774915	0.0169432
424	-0.0221057	0.545555	0.154261	0.280329	-1.08626	0.707811	1.10805	1.08215	-0.385355	0.558954	0.552514	-0.0618688	-0.273897	-0.161751	-0.00504931	424	0.226048	0.583	0.484375	-0.206503	-0.0529702	0.192449	-0.127418	-0.170366	0.449758	0.5591	0.550599	0.535159	0.123029	1.15051	0.0216763	-0.31644	-0.20414	-0.703606	-0.0803583	0.73902	1.02515	0.123031	-0.528684	-0.666172	0.555785	-1.15981	-0.397275	-0.791935	0.046838	0.608649
425	0.287582	-0.920456	0.0983186	-0.316567	-0.559791	-0.60963	0.911474	0.535142	0.698644	0.218252	0.514109	-0.0188441	-0.477537	-0.773586	0.183661	425	0.573139	-0.581399	-0.0670081	-1.14247	0.0116315	-0.100783	0.0138822	0.714317	-0.302166	-0.418064	-0.282931	0.726686	0.015605	0.821289	0.8496	-0.497902	-0.58147	0.897316	-0.53543	0.407662	0.161533	0.787996	-0.368977	0.618297	-0.6098	-0.296577	-0.594122	0.0649242	1.12937	0.677188
426	0.875286	0.828863	0.275125	-0.0134261	1.0181	-0.130535	0.00342689	-0.328028	-0.240008	0.47362	-0.358684	0.0833164	-0.157609	0.153525	-0.136299	426	-0.678414	0.844117	1.04463	1.33106	1.03581	-0.711121	-0.938325	-0.487754	0.851374	-0.849986	0.380863	0.47696	-1.94579	1.08674	0.490536	-0.0936769	-0.605325	-0.763504	-0.74742	-0.623825	0.636859	0.202537	0.171246	-0.0137222	0.270418	0.731893	-0.961688	-0.741444	0.295539	0.101328
427	-0.506538	-0.206352	0.537881	0.3238	-0.32219	0.499718	0.414266	0.24692	0.0461347	-0.872484	-0.0556424	-1.14709	-1.8019	-0.100705	0.251996	427	-0.641298	1.07251	0.408353	-0.217383	-0.528764	-0.263021	0.290546	0.610888	0.692305	0.313476	-0.0495847	1.05565	0.87179	0.644859	0.1417	-0.0440298	-0.467344	-0.155476	-0.881495	0.00688086	-0.121778	0.57824	0.728142	0.340896	0.722181	1.15977	-0.838069	0.891967	0.269771	0.53401
428	-0.284291	0.566641	0.47107	0.650357	0.520805	-0.575752	0.605574	0.510974	0.331677	0.227275	-0.892142	0.991634	0.378497	-0.467965	-0.545867	428	-0.172832	1.54045	0.595887	0.340488	-0.571096	-0.598498	-0.0275742	0.291428	-0.785456	-0.22819	0.108086	1.10238	0.0811902	0.152361	-0.111349	-0.137349	-0.423936	1.78259	-0.316566	-0.420725	0.497313	1.03204	0.409661	-0.69109	-0.566644	-0.266161	-0.403759	0.252383	0.419028	-0.171546
429	-0.547237	0.532641	-0.50522	-0.172071	0.317091	0.161206	-0.642422	1.07944	0.0948826	0.605223	-0.4312	0.322049	1.0577	1.08651	-0.238999	429	0.977853	0.947394	1.63887	-0.301278	0.21274	-0.501273	0.473472	0.388585	0.676559	0.896461	0.670992	0.819838	0.749381	-0.224124	0.460819	0.911028	-0.540289	0.214332	-1.25301	-0.174105	0.250232	-0.746401	-0.717315	-0.429986	-0.0896216	0.78821	-0.214448	-1.24898	0.585567	-0.102264
430	1.49273	0.371552	0.72012	-0.988267	-0.215599	0.137312	1.15994	-0.00288603	-0.32922	0.4373	0.000355366	-0.340569	0.171337	-1.10507	-0.212457	430	-0.509488	0.398255	1.45803	0.106242	0.750455	0.129244	-0.766061	-0.212661	1.08028	0.0206331	0.573244	-0.409574	-2.84284	-0.107697	0.614938	0.138111	-0.203356	0.29313	-0.0809125	0.0391795	0.690447	0.500953	-0.158886	0.112955	0.173022	-0.790279	0.226863	-0.110803	0.824778	0.952986
431	-0.331461	-0.363566	0.344251	-0.235095	-0.012407	-0.403837	-0.000844954	0.707432	-0.13222	0.563298	-1.18304	0.263517	0.0508486	0.146458	-0.687868	431	-0.922023	1.32138	1.80746	0.527949	0.707446	-0.0847261	-0.290915	0.749538	-0.420485	-0.906252	0.436528	-0.558479	-0.873665	-0.486401	0.125285	0.674318	0.124399	-0.174715	-0.586322	0.541617	0.675555	0.885284	0.029711	-0.318029	0.184182	0.281814	0.127617	-0.203735	0.242811	-0.893902
432	0.273816	-0.100096	0.54591	0.0958484	0.311955	-0.886296	0.982901	0.975101	0.0518585	-0.23602	0.91306	0.0258409	1.11553	0.394024	0.604802	432	-0.413901	1.17437	-0.271795	-0.038758	0.795756	-0.334088	0.0988981	0.0606785	-0.212115	-0.365996	-0.265677	0.991374	0.761216	0.327605	0.641929	0.00878941	0.144432	-0.553879	-0.0333909	0.227913	0.526636	-1.13519	-0.00796205	0.0936662	1.03573	-0.356182	0.498946	-0.205401	0.494546	-0.341806
433	-0.153693	-0.522187	-0.329717	0.102855	0.670395	-0.0234993	0.759962	-0.0935373	-1.12736	-0.888288	-0.279955	0.995691	-1.52721	0.119686	-0.302615	433	-0.55751	0.953209	0.584933	0.9058	0.493262	-0.326792	1.04696	-0.368566	0.0484832	1.76089	0.348609	-0.365691	-0.0528502	0.522129	0.344058	0.738626	0.10478	0.448599	-0.0672393	0.34774	-0.766876	0.280717	-0.365574	-0.104269	-0.0291197	0.358301	-0.134471	-0.364907	0.0498119	-0.510712
434	0.823417	1.3489	0.774589	-1.14562	0.22654	0.85115	-0.335906	0.857086	-1.14127	1.66836	0.415539	-0.352262	0.944978	-0.354139	-0.391566	434	-1.0509	0.653381	-0.47663	0.282447	0.187843	0.318514	0.277995	0.230736	0.395692	-0.283844	-0.88245	0.945822	-1.26321	1.27587	0.613954	0.449092	0.121909	-0.231929	-0.0896182	0.575302	-0.118112	-1.54618	0.890191	-0.576665	-0.750067	-0.0609064	0.361303	-0.0540471	0.658205	0.421402
435	0.959528	0.663428	-0.242815	-0.031741	-0.223804	0.77819	0.449462	0.391974	1.16204	0.166262	-0.667114	0.00999234	-0.127563	-0.416181	0.640367	435	-0.948104	0.854079	0.282257	-0.250357	0.0242652	0.0293851	-0.641529	-0.183333	0.21301	-0.57026	-0.919042	-0.188321	-0.480669	0.0309182	0.539024	0.342999	0.545497	-0.507743	0.367555	-0.033225	-0.72779	-0.382429	0.551608	-0.659999	-0.147289	0.499814	1.94019	0.179815	0.591572	-0.0402981
436	-0.271879	0.612423	0.508477	0.0385753	0.479462	-0.398191	1.01571	-0.00107691	-1.0065	-0.470667	0.248854	0.466961	-0.293924	-0.0713859	-0.973252	436	0.590588	0.568038	-0.561488	-0.684156	0.481355	-0.311357	0.579955	0.523891	-0.0291602	-0.0754132	-0.450654	0.346998	0.596844	0.0263822	0.132134	-0.735449	-0.125815	1.18096	0.11061	-0.215135	-0.229641	-0.0664846	0.292187	-0.952327	0.548114	0.75714	-0.322134	-0.105366	0.495353	-1.22982
437	0.203292	0.292379	0.88584	-0.0122818	0.288577	-0.0671351	1.13639	0.924182	-1.08173	0.625804	0.540912	-1.03642	1.38449	-1.27812	-0.393458	437	-0.396919	0.426218	0.605574	0.343401	0.481245	-0.408844	0.16346	-0.142359	0.28684	-0.823554	0.0585203	1.19361	-0.451517	-0.0182544	-0.489831	-0.0428934	-0.102606	0.209994	-0.501153	0.0640215	0.492695	-1.84182	-0.193393	-0.885395	0.640578	-0.565177	0.376421	-0.208357	-0.72486	-0.519404
438	-0.549725	-0.443948	0.0304357	-0.123228	-0.592573	0.538566	0.0563529	1.38603	0.829146	-0.194127	0.895548	0.0403266	-0.579786	-0.690358	-0.101975	438	-1.21029	0.0136705	1.16149	0.0540144	0.256225	0.107515	-0.236754	-0.298952	-0.344775	0.215642	-0.25344	0.465373	0.249376	-0.605652	-0.0882784	-0.150546	0.418471	-0.439418	-0.36747	-0.914568	0.325091	0.872452	0.630709	0.105488	-0.165623	0.227098	0.740504	-0.0734968	-1.07587	0.183787
439	-2.16372	-0.289858	-0.341307	0.336527	0.258371	-0.625251	-0.450517	0.210442	0.554989	-0.448765	0.0665514	1.39229	-0.0843053	-0.173482	0.186028	439	0.477051	0.396505	0.177918	0.318726	-0.54618	-0.00750211	1.33282	-0.273725	0.193988	-0.622508	-0.206114	0.282742	-0.0737918	0.406536	0.00871673	0.13825	0.598864	0.0344389	-0.829348	-0.221964	-0.48364	-1.85733	-0.012901	0.218497	-0.845892	-0.828074	-0.53959	0.446483	-0.0475023	0.885042
440	1.05195	-0.0955465	-0.453908	-0.00507991	0.679031	-0.216228	0.81329	0.341373	0.544761	-0.0983054	1.26155	-0.57787	0.159047	0.127383	0.596089	440	-0.19332	0.79887	1.00542	-0.0277598	0.523715	-0.32089	0.924395	0.207522	0.305802	0.61832	0.171051	0.0427602	0.128375	0.265785	0.1628	0.675583	-0.242426	-0.350828	-0.414734	0.183191	-1.08957	0.112794	0.0767163	-0.449731	0.254923	-0.355799	0.41292	-0.258459	-0.15791	0.31562
441	0.076722	0.976771	-0.274511	-1.58632	0.680578	-0.3315	-0.33344	-0.171356	0.737826	-0.148844	0.855942	0.618601	0.508152	0.751616	-0.0632605	441	-0.343516	1.07992	-0.0352768	0.847363	-1.13107	0.470951	-0.610013	1.12293	0.540574	-0.478261	-0.212792	0.913806	1.15513	-0.676657	-0.597364	0.438149	-1.01486	0.395575	-0.959144	-0.190952	0.299255	1.45207	-0.016556	-0.656931	0.351693	0.428446	-0.360072	0.499448	0.322185	0.395774
442	-0.775173	-0.307357	0.106246	0.0501806	0.320639	0.698858	-1.0767	-0.0573126	0.108542	-0.0286693	0.202998	-1.26135	-0.0522278	-0.00522796	-0.547977	442	0.607482	0.305245	0.230974	0.0159482	0.223227	-0.218715	-0.630675	-0.450228	0.100247	-0.277446	-0.0172445	-0.229738	0.0162329	-0.0279054	-0.0769574	-0.0619918	0.347697	0.585575	-0.448806	-0.370917	0.586703	0.522998	-0.221533	-0.441534	0.106064	-0.331028	0.786276	-0.298588	0.987855	0.00896225
443	-0.56272	0.867396	-0.510078	0.849537	0.278189	0.480242	1.39748	0.698479	0.216712	-0.00804638	-0.340888	-0.19685	0.318976	0.418632	-0.422157	443	-0.251509	-0.670821	-0.291121	-0.545973	-0.174706	-1.04857	-0.368129	-0.311259	-0.556596	-0.760454	1.20598	-1.17539	-1.38276	0.705505	0.279016	0.0323852	-0.339857	-0.999711	0.119657	-0.162192	-0.0925925	-0.403612	-0.915692	0.637449	0.296897	-0.334618	0.3666	-0.309808	0.153381	0.437633
444	0.848536	0.177546	-0.142631	-0.327095	-0.160231	-0.510581	-0.565816	0.382984	-0.288331	-1.36109	-0.583649	0.526282	0.656751	-0.102767	0.583784	444	-0.201714	0.981755	-0.665099	0.200281	0.804999	0.175541	-0.223656	-0.364511	-0.534377	-0.25721	1.05152	-0.360736	0.256071	-0.000116762	0.717627	0.190767	0.490194	0.0898454	-0.62658	-0.483615	0.0053656	-0.349079	1.07804	0.737726	-0.0547066	-0.302069	-0.103503	1.05218	0.044037	-0.324474
445	0.746176	-0.0746009	0.605256	0.541602	-0.496399	0.148673	0.197925	0.662929	0.208811	0.952055	-1.47488	-0.0486154	-0.366876	-1.18111	0.221262	445	1.01215	-0.268654	0.409473	-0.0310913	0.528061	0.352763	1.22462	1.00215	-0.507913	1.41829	-0.0481374	0.645621	-0.464748	-0.0056448	-0.421707	-0.379202	-0.145538	-0.141555	0.186938	0.735718	-0.010112	-0.121795	0.180543	0.408877	-0.213977	0.213288	0.152429	0.379488	-1.84835	-0.379756
446	0.79396	-0.331596	-0.412103	-0.268762	-0.0916494	0.361003	0.0538417	0.0839529	-1.15534	0.0510876	0.807232	-0.184725	-0.0747299	0.417593	-0.172929	446	-1.00399	-0.503842	0.397836	0.239293	-0.147681	0.209984	0.507246	-1.33429	-0.421332	-0.221194	-0.823185	-0.321792	-0.0078602	0.592057	0.313591	-0.576752	0.217815	0.287483	0.72346	-0.192665	0.179944	-0.119622	-0.436585	0.190323	0.331262	0.74309	0.104847	-0.400521	0.464157	0.164214
447	0.0628913	-1.22721	0.0505534	0.09742	-0.0479649	-1.22089	0.00454774	0.0678321	0.0977365	0.7273	-0.391035	-0.0968039	-0.26861	-0.151483	-0.0801634	447	-0.31807	-1.05657	-0.461989	-0.081325	-0.0185193	-0.438484	-0.0507544	0.0279391	-0.305176	-0.258203	-0.624971	-0.0831842	-0.369607	-0.444054	0.807685	0.16314	-0.0491576	0.168332	0.514439	0.262331	-0.716427	-2.68266	-0.0577151	-0.353453	0.321748	0.169543	0.565566	-0.44041	0.139037	0.247497
448	-0.349114	-0.094629	-0.0245946	0.220646	-1.10179	-0.289463	0.531348	-0.953954	-0.955239	-0.993877	0.789782	-0.0491949	-0.297575	-0.415895	-0.0792442	448	0.253924	0.729533	-0.233204	-0.210239	-0.188526	0.0016836	-0.51788	-0.101527	-0.110528	-0.209402	-0.745623	-0.472162	0.222025	-0.284569	-0.58909	0.00782952	0.345027	1.09861	0.393764	1.04741	0.337906	0.0553318	0.525988	-0.28641	-0.638434	0.0955045	-0.838084	-0.0482781	0.163191	-0.516145
449	1.44546	0.219968	1.48442	0.571626	0.536923	-0.157165	-0.0288132	0.0536743	1.01158	0.406747	0.588702	0.886956	-0.696297	-0.0445575	0.324258	449	0.233086	-0.675964	0.298862	-0.511609	-0.384972	0.220139	-0.560633	-0.105719	0.677633	0.683766	-0.326794	0.733913	0.60869	-0.0896274	-0.229095	0.356484	-0.213941	-1.35574	-0.210815	-0.99536	-0.205964	0.591681	0.0925233	-0.438475	-0.293462	-0.515715	-1.07919	-0.579012	-0.142472	-0.325361
450	-2.28674	-0.206291	-0.882557	-0.148832	0.0817048	0.820828	-0.180368	-0.767228	0.0176961	0.403333	-0.454203	-0.194304	0.272438	0.313199	0.236427	450	0.0121613	0.0793928	0.349544	0.0773525	0.489193	0.274704	1.22988	0.514527	1.11747	0.360114	0.541248	0.349658	-0.0331734	0.231013	-0.203705	-0.170808	0.362617	-0.128412	0.307086	0.35024	-0.384078	1.05469	-0.229014	0.202428	-0.207084	-0.166442	0.405129	0.145498	-0.283019	0.291656
451	-0.195882	-0.232101	-0.794671	0.285291	0.868374	0.157408	0.90311	0.529169	-0.936834	0.0823661	0.102522	0.836608	-0.137464	0.457796	-0.401121	451	0.865694	0.790732	0.33058	-0.0839413	0.0807039	0.25739	0.166755	0.25804	0.952314	0.400597	0.230683	1.21626	0.335927	0.865248	1.33263	-0.422424	-0.753657	0.701187	0.244256	-0.601241	-0.90169	1.07869	0.793125	-0.67366	0.335273	1.20251	0.621705	0.280478	-1.02653	1.13706
452	0.723456	-1.07794	1.09609	0.927984	0.955426	0.363842	0.56074	1.25307	1.95973	1.5592	-0.299977	-1.83785	0.00387024	1.46779	1.03918	452	1.01292	1.36655	0.79159	0.947853	0.219449	0.304784	0.700003	0.46527	1.56517	1.98744	2.14892	0.105473	0.0910911	0.3474	0.856467	0.0349917	0.305591	0.810563	-0.517076	0.193605	1.83196	1.04371	0.376083	1.20549	-0.0484879	0.66274	1.77434	1.06845	0.287627	1.93878
453	1.65762	-0.280048	0.603428	2.14485	0.063377	0.841151	1.04236	2.33314	1.58378	-0.415133	0.782304	0.511327	0.575946	0.484377	1.76434	453	0.114251	0.681881	0.914086	0.279546	1.61577	1.16091	1.5511	1.17613	1.36713	2.25726	0.319382	1.82309	0.362795	0.302104	0.749773	0.935186	0.82296	1.12651	0.640928	1.79759	1.15591	0.0903671	1.05081	-0.494207	-0.767005	0.00302578	0.912551	0.819009	1.54475	1.35508
454	0.269595	0.565901	0.733357	0.541595	0.269981	2.02759	0.690754	2.92794	1.0613	0.958743	0.221044	1.2495	0.515742	1.08279	0.756111	454	0.303491	2.45146	1.21555	1.14884	0.44351	1.15412	2.33086	1.70865	2.71736	0.788278	1.47518	0.304678	-2.15855	-0.332283	0.326828	1.08455	1.60746	1.31929	0.340168	0.84806	1.76982	2.0023	0.157721	0.0584131	0.126562	0.320925	0.691113	0.960638	1.05884	1.14839
455	1.37874	-0.0390115	0.330764	0.391566	0.230966	1.23536	1.20073	3.25394	1.25518	-0.148951	-0.036857	0.340836	0.435211	1.57797	1.0288	455	0.79056	1.32429	0.201929	0.631727	1.98228	1.70082	2.88873	0.82279	3.54128	1.27874	2.01936	1.51848	-0.636314	0.357293	1.70417	1.48784	1.89181	0.0739341	0.845674	0.427855	1.13296	-0.245147	0.371747	0.0400112	0.589015	-0.116022	2.87543	0.903797	0.453968	0.597978
456	1.54877	0.473172	0.20533	0.00503145	1.77139	0.824969	0.983555	1.95705	3.2831	0.565326	1.47925	1.32636	0.361516	1.75858	0.817178	456	0.371033	1.56649	1.93229	1.11297	1.92503	1.88586	1.885	1.12306	4.80696	2.29137	2.02123	3.07222	-1.08416	0.45225	1.36163	1.00294	1.15725	1.5193	0.37191	1.3427	1.42686	1.86315	1.60516	0.427893	-0.380856	-0.69515	1.45091	1.05386	1.77723	1.71236
457	1.58538	1.25656	0.251381	0.984929	1.18712	0.90755	3.42387	2.74263	2.33801	0.610958	-0.424266	1.47263	1.09703	2.14167	1.98399	457	0.644002	1.343	0.758244	0.718331	2.07069	2.09326	1.86681	0.644107	3.66766	1.84641	2.06635	1.45337	0.611227	1.84184	1.12792	0.288412	0.569198	1.22158	1.14185	1.59456	2.09382	1.8202	1.68932	0.145178	0.0807046	0.742459	-0.730698	1.37818	1.64353	1.32383
458	0.702545	2.02499	-0.38489	1.45363	0.374902	0.231456	1.26838	2.60752	4.60794	1.00725	1.22624	1.74397	1.38147	1.92008	1.41124	458	-0.627546	0.8451	1.79222	1.39704	2.35468	1.43518	1.64663	1.23377	3.96907	1.53831	3.00988	3.60848	0.302312	1.28103	1.77532	0.282686	0.910368	0.624062	0.855803	1.37833	2.53407	0.512979	1.19518	0.445268	1.20314	0.20462	0.780253	1.53519	1.96554	1.55957
459	0.968779	0.64174	1.88055	1.55712	1.74927	0.97099	1.81638	3.8549	2.83857	0.0592316	0.757262	1.39016	0.867245	1.2777	1.09337	459	-0.314738	0.295817	1.34056	0.542662	2.53213	2.149	2.2948	2.51278	3.68263	2.21429	2.78016	2.90612	0.28932	0.61065	1.5451	0.908245	2.2739	0.349236	1.09597	1.39085	2.94191	0.753614	0.969222	-0.0220668	-0.734027	-0.140213	-0.187822	1.28566	2.01575	1.46794
460	0.937669	0.625247	0.897856	2.50482	0.752912	1.70886	2.73327	3.39813	3.38223	1.35242	0.615254	1.77149	0.826514	1.57313	2.66199	460	0.897939	1.62556	1.36069	1.06371	2.67863	2.04788	2.41083	2.54126	3.2226	3.72587	2.0565	3.51598	1.13828	1.30296	1.94944	0.921797	0.440162	0.979717	2.36895	2.23114	2.98238	0.898775	1.30481	0.101275	0.470494	-0.686967	0.39759	1.51534	1.22094	2.78393
461	2.66901	0.389894	1.12435	1.351	0.992296	0.709051	3.70586	3.01313	3.84103	3.48992	1.09655	0.952181	1.08246	3.25554	2.38566	461	0.805039	1.21163	2.21259	0.701213	2.5827	2.46607	2.19535	2.88135	4.59169	3.26702	3.43189	2.49855	1.5852	0.992981	1.51989	1.62848	0.649284	1.29059	1.56179	2.55351	3.682	1.75061	0.4077	0.380154	-0.207616	-0.226589	1.44921	0.840367	1.20318	2.29345
462	0.280888	1.09195	0.539133	1.95488	2.53485	1.81649	1.61431	4.81642	3.94965	1.79361	2.56338	2.13754	1.60261	2.14914	1.62559	462	-0.246162	1.73036	1.27129	0.701024	2.67592	2.87041	2.43239	3.35846	3.93699	3.26232	3.3426	3.3341	1.44451	1.58533	2.24704	0.709402	0.269146	1.68195	1.29429	2.54012	2.90175	1.23326	1.67204	0.267416	0.738729	0.315687	0.0380869	1.412	2.94021	1.70224
463	1.80486	1.66212	2.32502	2.21334	1.57175	0.325768	2.49679	3.14051	3.70388	2.31745	1.57197	1.45885	1.55829	1.97801	3.41966	463	0.683057	2.14593	1.70419	1.72349	3.52794	3.32951	3.08908	2.48832	4.39482	3.8063	3.57754	3.29104	0.56497	1.52529	1.28254	0.312028	1.75351	1.09208	2.0144	3.43543	3.83485	-0.0514187	0.982108	0.799728	-0.168856	-1.35617	-0.71191	1.52029	1.58978	1.52553
464	0.876904	0.594639	1.40969	1.82341	2.36591	1.2508	4.56435	3.57738	3.86926	1.67381	2.35091	1.7186	2.24131	2.88166	1.83574	464	1.20664	2.22661	2.92687	2.6221	2.94488	3.15726	3.89852	3.63785	3.29915	3.71462	3.4687	4.13219	2.04066	2.0666	2.63344	1.0244	2.08266	1.15927	1.7008	2.87846	4.26825	2.83178	1.54792	1.37306	-1.72583	0.204722	0.954664	1.32892	2.485	2.26275
465	0.965309	1.26154	1.44333	2.62527	2.98079	1.82967	4.4938	4.60037	4.02649	2.59221	2.14721	2.12064	1.15728	3.25057	2.31043	465	0.258508	1.02343	2.40117	1.85593	3.8842	2.81731	3.73809	3.54944	3.82013	4.42061	3.37928	5.79299	1.44473	1.06677	2.44671	2.06956	1.9728	0.855552	2.32415	3.11454	4.62647	1.77087	3.46872	1.03438	-0.918708	-0.36134	0.123708	1.59577	2.52402	2.90936
466	1.71322	-0.31921	0.681564	2.75837	2.20808	1.2392	4.33195	4.05441	4.44515	2.50847	1.81457	2.17996	1.09066	2.58504	3.1757	466	1.32254	2.49985	1.87809	2.98611	2.64868	3.04349	2.77815	2.69791	4.67585	4.43842	3.5471	3.97161	0.775963	1.55216	2.16454	1.1619	1.15448	0.958654	2.95869	4.54152	5.28967	1.43925	1.32302	0.899075	-0.107528	0.768913	-0.818639	1.4761	1.46803	2.05031
467	0.513573	0.808612	1.28783	2.40986	2.03965	0.60027	5.82938	4.4696	3.75707	2.70225	2.13519	2.75879	1.64699	4.16769	3.11783	467	0.0213077	2.27951	1.50331	2.61851	2.89299	3.59395	2.80624	3.8576	3.00749	4.42428	3.39478	5.08572	2.27478	1.4359	2.57111	0.515076	1.71042	1.76327	2.79665	3.923	4.46872	2.08535	1.05269	0.935616	1.1519	1.15159	0.765108	1.293	1.16804	3.39729
468	0.278956	0.626319	1.56525	1.88393	2.69858	1.85025	4.93281	4.04489	4.23472	2.96027	0.153979	2.66954	0.651939	3.67839	3.31492	468	1.06073	1.93964	1.83458	1.91871	2.71272	3.52593	2.33455	2.1543	4.04518	4.05229	5.18987	3.70476	1.59337	2.08201	2.44476	1.44348	2.9663	1.16602	2.77948	3.66578	5.20229	1.68128	2.12436	1.58949	-1.1335	-0.133376	0.382634	1.92158	2.55687	2.36839
469	0.380481	0.255755	1.95743	1.55559	1.60657	1.3924	5.4219	5.51778	4.83329	3.51652	1.64564	1.97593	1.41218	4.62464	3.4624	469	2.14049	2.82215	3.1362	2.0772	4.08283	3.67269	4.31539	2.73388	3.87358	3.50855	4.13931	5.18838	1.5941	1.81738	2.70644	1.87199	2.43291	1.30272	2.76601	4.12947	4.78105	3.21494	2.3134	2.28885	0.307118	-0.0255963	0.926695	1.41282	0.922714	2.85243
470	1.86381	1.48191	1.65995	2.83598	2.36313	2.20551	4.42704	4.81937	5.04843	2.92278	2.18617	2.54316	2.57857	4.27241	4.14817	470	0.670381	2.48467	1.52991	2.28452	4.42436	4.13909	3.32546	2.7593	3.95823	4.44386	3.32742	5.33689	2.22147	2.02248	3.30602	0.681623	2.03755	1.64058	3.16483	4.76372	5.41879	2.64919	2.68808	0.115868	1.39399	0.870792	0.257682	-0.141478	2.22707	2.97022
471	2.64021	1.71605	0.537986	2.39546	2.25664	1.50432	4.01288	5.13839	4.99312	3.43096	2.17413	3.46439	1.00425	3.31552	3.87562	471	0.465305	2.81232	2.9188	2.20834	3.9615	3.9909	4.08522	3.136	4.54372	2.98953	3.88171	5.30065	1.42822	1.40703	2.31757	1.47013	4.72485	1.32563	4.33603	5.58214	4.64946	2.74877	2.10491	0.704175	0.308385	0.351678	0.137046	2.25331	1.32272	2.56275
472	0.820485	0.612823	1.79342	2.82995	2.86412	2.13923	3.56848	3.64906	5.57889	2.64877	1.69485	2.99729	2.30037	3.47225	3.86617	472	1.65361	2.81151	2.32714	3.08543	3.08399	4.16524	2.21364	3.94314	4.34944	3.94433	3.91116	6.2214	1.78509	2.09745	2.56264	2.48003	2.76303	1.04242	2.94703	4.38578	5.15136	3.2529	2.41972	0.865902	-0.0910599	-0.109407	0.329385	1.7759	3.31461	3.0267
473	2.40463	1.35219	0.428186	2.84331	3.08409	1.44889	5.28984	5.45655	4.23849	3.27899	2.19739	2.3896	2.43612	4.25379	3.2491	473	1.45103	3.11962	3.06473	2.74992	5.1861	3.80166	4.20308	2.86283	3.78545	4.07926	3.74516	5.10619	1.5445	2.22864	3.39155	1.80458	3.75641	0.57599	3.16142	4.44816	5.72995	1.27442	1.66685	1.35998	0.741934	0.0829633	-0.0011134	2.83136	2.11796	2.37325
474	1.73637	1.50134	0.116467	2.11763	2.59551	2.48199	5.39512	6.51597	5.41037	3.3577	1.91864	3.99435	1.90343	4.35069	3.41766	474	0.706079	5.08444	1.57022	3.2575	4.27756	4.43312	3.09174	3.28131	4.0618	4.1061	5.36353	5.52933	0.755671	3.06285	2.25568	2.05631	3.19649	0.775045	3.42718	4.71961	5.23129	2.68121	2.55212	1.96506	-0.764095	0.273959	0.304064	1.95049	1.83392	2.42557
475	2.90239	0.345217	1.53931	3.06636	1.4601	2.10032	4.44049	5.28111	4.3349	4.04302	0.921454	3.04233	3.19371	3.88206	2.72342	475	1.84583	3.69589	2.84233	2.87694	4.92862	5.28301	4.06637	4.30893	3.69692	5.04447	4.69041	3.81756	1.74389	1.54027	3.03796	1.94276	4.7213	0.707809	4.66047	5.34891	5.0397	2.4509	2.05002	0.544739	-0.0579631	-0.0615748	0.927613	1.96344	3.8465	2.80736
476	0.583698	0.467911	1.53862	1.69786	2.83009	2.13566	4.52506	5.55414	4.45544	4.7137	1.34363	3.24541	1.74128	5.21977	3.04125	476	1.98398	2.26731	2.19078	2.90953	6.12454	5.58298	3.50557	2.00731	4.76816	4.54796	4.90348	4.64855	2.61435	2.46679	3.31228	1.66626	3.24277	-0.0365394	4.08455	5.38925	5.71204	2.97906	1.78125	1.57481	0.351788	0.204693	0.234196	1.64078	2.95372	3.39253
477	2.17626	1.14874	2.16199	2.42331	2.91042	3.39184	5.20839	6.03825	2.66387	3.4104	1.77553	2.98906	2.9308	4.44255	3.71269	477	1.73374	4.41808	2.11143	2.97406	4.25796	3.83361	4.23972	4.08815	3.97229	5.66197	4.87938	4.86301	2.94634	1.80222	2.67718	1.16811	3.26646	1.6197	4.57726	4.79966	5.25896	1.67145	2.06413	1.07487	0.190652	-0.301796	-0.0963992	2.44298	1.57243	3.66537
478	1.31336	1.1481	1.84613	3.19853	4.11251	2.32177	4.5911	6.18647	3.25942	4.14339	3.29178	4.57544	2.82236	4.63427	4.06611	478	-0.44096	2.70526	2.17285	3.20417	5.28776	4.39588	4.76569	3.23084	5.21499	5.76824	5.21947	4.62227	2.73453	1.94219	4.29014	2.23602	4.48011	0.623965	5.08149	4.57251	5.92549	2.94511	2.36592	1.68929	0.546415	-0.697892	0.483392	2.09876	1.83409	2.909
479	1.92379	0.287117	2.33525	2.92168	3.17668	2.28704	5.96684	5.95684	4.46743	3.36501	1.70223	3.13498	2.32501	4.96145	3.85388	479	0.779638	1.93193	2.6976	3.28447	3.78636	5.4431	2.35588	3.09686	4.19482	5.56973	6.01986	4.58499	1.91005	2.54436	5.32561	2.10591	3.68804	2.5759	3.12082	5.50829	5.29942	3.87331	1.5724	1.05869	-0.612316	-0.407857	-0.12712	2.09467	2.44938	2.9814
480	1.71294	0.497673	2.72501	2.89054	2.66307	1.99059	5.93097	6.25276	3.79837	3.91017	2.64577	2.76932	1.99482	5.56121	4.04663	480	1.66286	3.21506	1.86776	3.46554	5.01087	5.56737	4.10415	2.94272	3.48376	5.4494	4.76482	4.06455	2.30153	2.00398	4.01355	2.2139	1.83431	1.57449	5.10257	5.41331	5.40751	3.40425	1.96567	1.83307	-0.401644	-0.386093	-0.501017	2.03411	3.22049	3.64518
481	2.19676	1.05287	2.73954	2.14306	3.23817	2.45383	5.43822	4.64468	5.2365	2.88453	2.98891	3.25164	1.73386	4.34857	3.23506	481	1.61484	2.9083	3.43141	3.91248	5.31982	5.80113	3.41791	1.86281	4.12148	5.44506	4.97396	4.89065	1.85967	-0.0870902	4.11141	1.15658	3.75084	1.37651	5.08693	5.97489	5.59744	4.03065	2.11721	0.0276334	0.334698	-0.0243838	-0.532555	3.00195	3.22536	3.98094
482	4.00003	0.883953	1.6305	3.1782	2.67113	2.24428	5.71016	4.38692	4.80613	3.52267	3.00372	4.43942	2.73662	5.01388	2.67108	482	0.738191	3.86158	3.57226	3.81282	4.91429	5.37722	5.4583	4.32454	4.31451	5.24221	5.20054	5.64755	2.53135	2.04783	3.73841	1.89606	3.13767	1.9218	4.74752	5.69694	6.15901	4.08953	2.78909	1.35641	0.311898	0.123	0.153268	1.83179	3.30361	3.07039
483	3.15421	1.76889	1.38719	2.46284	3.32013	0.758311	6.21638	5.63191	5.2861	3.05017	3.34984	4.4769	2.51011	3.62874	4.20486	483	2.31508	2.8574	3.21211	3.94179	5.46291	5.85572	2.23962	2.97569	3.70439	5.9117	4.86209	4.35168	2.33194	2.71578	2.84501	2.57338	3.97851	1.64225	4.50935	5.54529	6.16585	2.7548	1.48061	1.21655	0.639914	0.0720241	-0.43312	3.02534	2.59015	2.97172
484	2.92265	1.36584	2.03281	3.76693	3.33532	3.0436	5.0573	6.0561	6.1712	4.18551	2.22341	3.73641	2.13092	5.43184	3.85988	484	1.9349	3.73367	3.15016	2.53762	5.07478	6.89434	3.48508	3.81161	5.13945	5.01523	5.82229	6.03442	3.73808	2.56251	4.48354	2.61702	3.26543	1.30645	5.15116	5.50612	6.14948	1.7017	2.26703	1.57242	-0.0305438	0.101376	-0.619922	3.01421	2.54873	2.44434
485	2.34082	1.01154	1.6211	2.76029	2.37157	1.86052	5.1213	5.93257	4.2578	4.48893	1.46051	4.38964	1.6179	6.01847	5.01137	485	1.43115	4.12383	3.10778	4.20343	5.68278	6.43938	3.4548	3.28468	3.87302	5.86413	4.94961	5.99323	2.19504	2.1515	3.88813	1.89003	3.46061	1.75736	5.27141	6.60277	5.08959	3.78898	2.63196	0.944368	0.168331	0.267406	-0.0525944	2.43121	2.12527	3.78949
486	3.76104	1.26614	1.71451	3.64973	3.07479	1.08821	6.23236	5.10617	4.24151	4.10567	2.65206	4.01339	2.8442	5.08551	4.60373	486	3.12787	3.49364	2.94365	4.34994	3.99932	7.01949	3.44541	2.56246	3.61487	6.49141	4.21391	3.9823	2.29169	1.8773	3.10799	2.80232	4.46808	2.51453	4.23568	5.73918	5.81418	3.97238	3.91726	1.93303	-0.684538	-0.083244	1.31423	3.58136	2.53954	2.85863
487	2.07805	0.958856	2.38316	2.89024	2.47223	2.98453	6.22797	5.76264	4.86751	4.36911	3.69659	4.5663	2.99519	4.96455	3.88739	487	1.84926	2.82389	2.65916	4.45798	5.65113	5.6077	2.96368	2.04534	4.70519	5.74189	5.40895	5.7526	1.77447	2.23275	3.99403	0.906734	5.09125	2.09961	5.01966	5.81352	6.84647	3.63425	2.09708	1.05678	-0.296932	-0.0293768	0.68416	1.16454	2.06656	2.92756
488	1.86901	2.13165	1.20829	3.58373	2.66447	2.37762	5.11367	4.3448	5.32028	4.7021	3.4608	3.83981	2.3725	5.38269	3.89387	488	2.20744	2.85708	2.29424	3.05555	5.43987	6.79975	2.67603	3.21054	4.27126	6.53952	5.56088	5.34419	3.91647	2.02691	3.96397	0.935111	3.94977	1.91527	4.48502	6.01588	6.25228	2.49517	2.0267	1.29606	0.197555	-0.228492	-0.168543	3.19672	2.83644	2.39309
489	1.9929	0.940207	2.73505	3.21611	3.29537	1.61799	5.76412	4.81644	4.89316	4.50578	3.09075	4.04785	1.97791	5.8728	4.28215	489	2.03743	3.77792	2.5545	4.3129	5.37713	7.30525	3.25223	3.36368	5.26462	5.01299	5.86772	6.44848	1.78931	1.59463	3.60427	2.90981	4.06781	2.54738	4.9353	5.79563	6.96824	2.84811	2.06485	1.00644	-0.777947	0.395914	0.000270437	3.7657	2.9872	4.21926
490	2.96599	1.45125	2.39529	3.67752	2.39848	2.28631	6.04764	4.14024	6.61687	4.0254	3.5166	4.5642	1.50404	4.92726	3.07663	490	2.49894	3.27895	4.09247	4.48228	6.67013	6.10839	3.59404	3.27948	5.60665	6.38546	5.26279	5.5712	3.54081	1.96168	3.07222	2.47166	5.03337	1.53177	4.63791	6.88205	7.11634	4.61014	2.43358	1.56447	-1.71963	-1.548	-0.522286	3.75278	2.70589	2.9174
491	2.56195	1.00287	1.73529	2.8345	1.61616	0.941057	5.56048	5.33245	4.73546	4.32927	1.72768	3.14459	2.38418	6.02692	3.76262	491	1.46966	2.61564	2.77661	4.93756	5.28753	6.71649	3.08496	2.92945	4.87256	6.47337	5.77345	4.37966	4.42579	1.82108	4.09633	1.65585	4.9578	1.30393	4.22663	6.05911	6.65893	3.75499	2.10677	1.06602	0.421438	-0.276151	-0.312669	2.98945	2.18366	3.4477
492	1.70972	0.639788	2.07804	3.23144	2.70856	1.91725	5.52832	4.68504	4.18013	3.24043	4.21207	4.24605	2.94014	5.18386	4.18263	492	2.61761	3.96014	2.21832	4.55235	4.87592	7.17444	2.80762	3.78505	4.83756	6.30486	6.81562	6.12828	1.87734	1.91175	3.5274	1.22717	3.97302	2.22662	4.66857	6.33381	6.69317	3.75701	2.12815	1.42091	-0.414229	-0.447074	-0.0184889	3.37706	2.6706	3.63589
493	3.01971	1.90838	3.18302	4.27781	3.70801	1.80527	5.47543	3.90783	4.28537	3.95748	4.67485	4.81327	1.71621	5.48012	4.27527	493	2.93395	3.46862	1.87673	4.40547	6.87143	7.00682	2.1176	4.23857	5.88441	7.15776	5.6332	6.06205	3.99821	3.0833	3.27281	2.1625	5.15091	0.656496	4.96532	5.84666	6.46096	3.05525	2.24838	1.94694	-0.333276	-1.74771	-0.332867	3.00356	2.60726	3.8472
494	2.88301	0.256061	2.91854	3.48351	3.29961	2.952	6.1709	5.01309	4.89291	3.52453	3.62806	2.95792	2.12216	5.90439	3.39849	494	2.30073	3.51833	1.45166	3.30753	6.55985	6.58748	2.69767	2.75081	6.87291	5.75417	6.47926	5.32476	3.95281	1.4665	3.07307	2.96737	4.18392	1.55003	5.53827	6.23171	7.14538	4.75924	2.42774	2.05921	-1.46535	-1.08496	-0.14988	2.56036	2.30495	3.39394
495	2.85778	0.857327	2.33293	2.83111	3.17501	2.0939	4.60283	5.08454	4.75539	5.54434	3.30111	3.30593	2.74195	5.2473	3.56628	495	2.38685	3.50876	2.04207	2.72424	6.45435	7.70305	3.72321	3.86505	5.32175	6.10872	5.81642	6.10489	3.56426	2.58751	3.74209	2.73081	4.85016	2.37779	5.65504	5.94428	6.67169	3.86729	2.07426	2.40414	0.24184	0.0262759	-0.14301	2.63209	2.99744	3.07778
496	2.3565	0.454415	1.78153	2.73584	2.54945	2.64367	4.79906	5.52536	5.07741	3.3126	2.86751	3.81748	1.32098	6.17098	4.38253	496	2.24504	3.30428	3.76773	4.03014	5.3091	7.67631	3.51723	3.23985	5.46358	7.07367	5.48795	6.59548	3.87756	2.47595	3.62742	1.6628	3.30318	1.59446	6.01385	5.69549	6.66513	3.0704	2.83485	1.48104	-0.295788	-0.794219	-0.880277	2.0729	2.39707	3.26325
497	2.62341	-0.260722	2.08979	3.07963	3.20676	2.14461	4.86972	3.03167	5.39412	3.9569	4.28297	3.29952	2.4221	5.6829	4.12932	497	3.94502	2.7565	2.34753	3.0494	5.21907	7.71748	4.19584	3.12209	6.21135	5.86233	6.20745	4.73273	3.57633	1.56265	2.55011	2.6432	3.79371	2.80261	4.92934	6.54227	6.70561	2.43976	2.26759	1.50922	0.211644	0.0483438	-0.110637	2.98708	2.04154	4.26536
498	2.94377	1.02171	3.22892	3.37259	2.92005	2.58226	4.52753	5.23697	5.60303	5.7466	4.07811	4.89594	1.68772	5.7611	3.80421	498	2.62002	3.51439	1.90261	4.43488	4.3268	7.17694	3.667	3.70122	5.74404	8.54688	5.17245	5.8715	5.33456	2.26618	3.42729	2.44473	5.63375	1.5201	5.2022	5.81582	7.12714	3.47825	2.77672	1.08283	-0.569122	-0.391652	1.0676	2.31278	0.586106	1.83379
499	2.60839	0.84311	2.50821	3.31499	2.77446	2.0196	5.46267	4.76935	2.72838	4.96758	2.91962	4.93221	1.2673	5.54846	4.18935	499	2.49506	3.5743	1.01218	5.25152	6.47243	7.66981	3.22442	3.48307	6.81674	6.58053	5.03328	6.25774	3.4953	2.72259	3.76645	2.43569	5.18287	2.52251	5.83105	6.51839	7.14363	2.17117	2.2884	2.30102	0.00688235	-2.17141	-0.792503	2.4986	0.697204	3.07066
500	3.90582	1.48438	3.46862	4.05588	2.43901	1.16309	3.83447	6.14007	5.46142	5.5464	4.71427	4.91751	1.3533	5.3324	4.89169	500	3.85841	3.05685	2.25375	3.97594	5.83694	6.63111	3.54245	3.06617	5.82085	6.71148	7.25004	7.19881	4.21694	2.27824	3.52578	1.42161	5.86176	1.06389	5.53538	6.18464	7.72543	2.38765	2.19185	1.46396	-0.682715	0.14538	-0.987176	2.68316	3.11678	3.3821
501	3.91615	1.07357	1.08041	3.20696	1.20805	2.78379	6.47212	5.27121	4.26849	4.40494	3.25175	5.33287	3.44911	5.52015	4.06824	501	1.63978	2.45352	2.55059	4.50851	5.02337	7.24917	3.09864	3.32678	5.7974	6.9695	6.60944	5.44749	4.94508	2.36549	4.40071	3.22446	4.75005	1.88837	6.0903	5.98535	5.96683	3.12267	2.10764	2.17766	0.184586	-0.591552	-0.152028	3.66571	2.51739	3.52894
502	3.06699	2.36025	2.68668	2.88835	3.44077	2.23451	5.10786	4.81652	5.82373	4.49055	2.73085	4.10318	3.47999	5.49444	4.2246	502	1.92837	1.6652	2.27151	3.65134	6.4624	7.4727	4.39505	1.5436	7.37754	6.20018	5.92754	6.25748	3.42222	2.93124	4.45278	2.52481	5.4453	2.66712	5.52295	6.08539	7.63102	1.55589	2.54788	1.24383	-0.815725	-0.627499	-0.760901	2.93473	2.136	2.80748
503	2.55243	1.66219	1.93686	2.79935	2.76948	2.08234	5.1772	4.35698	5.16547	4.10461	2.58771	5.18548	2.28637	5.6906	4.33365	503	2.98194	3.59466	2.22514	4.66204	5.76567	6.45042	2.53905	2.51499	6.427	7.37874	6.27978	5.29885	4.09843	1.93158	2.8986	3.48033	6.98164	1.69756	5.4453	6.52987	7.81552	3.8132	3.08517	2.02327	0.767587	-1.30034	-0.092594	3.16925	3.46254	3.11536
504	4.5712	1.21417	2.41613	3.16573	3.84742	3.11133	7.04137	5.38855	5.86309	3.87367	3.80298	3.9448	2.49005	5.36229	4.60517	504	3.45107	2.89931	2.40804	4.06054	6.65774	7.97346	2.8494	3.50131	4.88387	6.83166	5.41535	6.71373	5.02267	2.42923	3.79051	3.01419	6.45396	1.23199	5.09227	5.23413	8.0496	3.20263	2.43121	2.13173	-0.785172	-0.946711	-0.536167	3.23115	3.29004	3.33368
505	2.99545	0.913539	2.33796	3.38738	2.20884	2.47529	5.30146	2.70961	5.68538	3.9294	2.94626	5.01917	1.82671	6.03134	4.8222	505	2.92623	3.26593	1.80175	4.23273	6.35765	6.99228	3.95026	3.87781	5.78048	7.05052	6.53705	5.33237	4.39889	1.7578	3.08276	1.95508	4.89739	2.49022	5.55115	6.36521	7.40002	4.28464	2.94555	1.11712	-0.417931	0.54607	0.112841	3.09989	2.83478	2.6035
506	2.93981	1.72645	2.9449	3.44769	3.71608	3.11077	4.6597	5.07522	4.56942	5.14363	3.12099	5.25574	2.49798	5.84987	4.97612	506	2.63311	2.77065	3.27537	4.73719	7.21127	7.06069	3.41447	3.58537	5.86122	8.14044	5.56255	7.3356	3.78139	1.83225	3.82648	1.65847	4.0807	2.04307	5.02923	6.74285	7.67388	2.36014	2.46406	1.9221	-0.504362	-0.359056	0.420614	3.18164	1.95109	2.36751
507	2.12204	1.44381	3.00788	3.53383	2.98254	2.69797	5.28145	5.75661	5.13315	4.17167	2.65469	4.29664	2.06416	5.73478	4.70394	507	3.70062	4.1509	1.75336	4.4436	6.49616	7.4794	3.23222	3.70018	5.15486	6.56572	5.97418	6.4206	3.61547	2.57156	3.18736	2.38086	4.9769	1.89307	5.13764	6.50217	6.60728	4.15072	3.44815	1.82083	-0.722961	0.468679	-0.979431	4.06099	2.58461	2.81699
508	2.01377	0.964848	2.50889	3.36824	3.36817	2.27113	4.51261	5.52357	4.84836	5.46349	3.89561	4.55628	3.13886	5.92882	4.0763	508	3.3661	3.91805	1.98693	3.79996	5.91268	7.65314	3.23894	4.87994	5.28162	7.6202	7.39922	6.25014	2.0338	2.33968	4.00753	1.8525	5.48736	0.994134	6.13209	5.89415	7.57922	4.18808	3.29707	1.1155	-0.871142	-0.162489	1.09558	3.3266	3.54942	3.2554
509	3.1953	-0.138771	2.8544	3.00667	3.63409	1.56796	5.9028	6.4847	3.55551	4.40117	2.3715	5.02509	2.78741	6.48871	3.95778	509	3.45138	3.46347	2.77397	4.74654	6.06098	6.39903	3.30747	4.20699	5.96609	7.52033	5.42469	5.47562	4.27958	2.30948	4.06079	1.81994	6.13404	3.28525	5.88181	5.60584	6.73719	3.63993	2.16963	0.677344	-0.237655	-1.90905	-0.563737	4.20746	2.68894	2.7136
510	2.99234	0.968677	2.13429	2.40144	3.25239	2.942	6.83324	6.34283	4.48365	4.99312	4.65492	5.13946	2.79415	6.25661	4.40875	510	3.63541	2.40085	2.73115	3.36547	5.7492	6.63259	3.76252	2.84621	6.18975	7.20159	7.14532	6.96799	4.62209	3.17578	3.41893	2.24054	2.8859	2.29399	4.93384	6.56064	7.48651	2.80295	3.3024	2.50956	0.168659	-1.81373	0.481962	2.94606	3.76279	3.81639
511	2.29428	-0.320527	2.47537	3.79157	3.3025	2.89211	5.66864	4.99177	4.13356	4.53478	4.41455	5.32252	3.53243	5.64251	4.52662	511	4.35475	3.84251	-0.416979	4.28444	5.8341	7.18448	4.46431	3.36635	5.73453	7.52662	7.45862	5.64922	1.25032	2.02562	3.36455	3.33215	3.94947	1.07442	5.54487	6.03711	7.44687	3.7899	2.12467	1.30078	0.272867	-0.226341	0.450731	3.54936	4.05491	3.52881
512	3.5325	1.11377	0.866126	4.08746	3.92377	2.83248	3.90923	5.01537	4.08201	5.87835	3.42016	4.34926	2.44502	5.38274	4.47753	512	3.16991	4.26675	2.15186	5.21284	5.80618	7.50456	3.75141	2.42131	5.5572	7.32374	6.59934	5.80833	4.59187	2.4694	3.29735	2.34499	3.30746	1.51209	5.27621	6.65398	7.84042	3.1033	2.65531	2.14058	-0.467287	-0.584819	-0.0807179	2.95196	2.86859	2.54369
513	3.2987	1.2876	2.24807	4.24091	3.10078	1.98719	5.88029	5.51705	4.45844	4.08411	3.85379	4.41032	2.62633	6.39622	3.63971	513	2.93754	3.72511	1.51673	4.86681	5.95883	6.36559	3.63997	3.25108	5.98241	8.11751	6.66836	6.01294	4.36179	2.84798	3.13516	2.4887	3.904	2.2467	4.88241	6.96141	7.42503	3.17528	3.31473	2.56149	0.0704129	-0.388724	-0.110003	4.9582	2.49999	2.73968
514	2.60232	1.81094	2.97609	3.62188	3.49092	2.37452	4.143	6.40475	5.59079	5.21821	4.54741	4.41188	3.41394	4.86828	5.23225	514	3.42083	4.22066	1.72026	4.07865	4.86724	7.62082	2.52067	2.75652	4.04098	6.93958	6.43767	7.11697	3.65008	2.98758	2.54572	2.54555	4.41925	0.475797	5.39847	6.71723	8.03774	3.0674	2.76233	2.32521	-0.564076	-1.32219	0.611038	4.01292	3.20652	4.2575
515	1.29676	1.1603	2.96907	3.47925	2.93318	1.8104	6.0214	5.50888	4.73994	5.29353	2.88968	5.03611	3.57413	5.9874	4.70324	515	3.17239	3.7414	1.92757	4.47981	5.65756	7.12415	3.31003	3.54064	6.43702	7.14907	5.82922	6.46853	4.51623	3.19699	4.34122	2.80399	2.21753	1.98154	5.19497	6.18949	6.69591	3.95875	2.81303	2.02004	0.85492	-0.278748	0.16098	3.28901	2.67647	2.15253
516	1.4016	0.621669	1.08899	4.1114	3.55066	1.59968	4.28807	4.75249	4.33893	5.11716	4.08047	4.97039	3.09723	6.81504	4.18913	516	2.30758	2.27864	2.69546	4.5473	6.38203	7.95243	2.76259	3.84853	4.83232	7.33348	6.57637	4.77295	4.00539	2.39627	3.37655	2.08922	5.376	1.64055	5.36781	5.80078	8.38768	4.58606	3.01382	0.764159	-1.46936	-0.335981	-0.767915	3.91274	3.5892	2.332
517	2.21842	3.09712	2.92877	3.51502	3.60725	2.39104	4.34584	6.39991	5.70259	4.91168	3.70427	6.19717	1.79281	6.82118	4.55573	517	2.53932	4.44895	2.13318	3.99416	6.11904	6.90582	3.02962	2.91829	6.56055	8.95499	7.62945	7.41566	3.91515	2.34598	3.43568	1.84908	3.73016	2.51445	6.40242	6.52385	8.53014	3.64319	2.00216	1.5055	-0.587479	-0.480278	0.551911	3.37806	1.50306	3.21028
518	3.20301	0.846326	2.12702	3.47013	3.53968	2.5533	4.00152	6.56255	4.75177	5.34502	5.26931	4.2896	4.0614	5.49687	3.32747	518	2.4572	1.80955	1.35644	5.41429	5.40581	7.05654	3.30112	3.53329	6.1664	7.38352	5.62645	5.49845	4.46064	3.70667	4.36934	2.72258	3.68092	0.877432	5.71655	7.26395	7.16169	3.6572	2.0093	2.06588	0.248349	0.249278	0.525742	4.78768	4.51497	2.63456
519	2.72563	1.19251	0.684165	3.74534	3.34902	3.61674	5.27603	5.68634	5.40407	3.43755	3.31645	5.03665	3.46449	6.4368	3.75713	519	2.73959	3.10772	2.1077	4.34211	6.846	7.58182	3.65136	3.02216	4.59896	7.49708	6.59257	6.20691	3.99475	2.41422	3.72895	3.04387	4.55706	2.15711	5.46078	6.60225	7.17156	3.17486	2.44725	2.53008	0.32229	-2.01219	-0.215619	3.93951	3.10809	3.14463
520	3.08872	1.37342	1.52533	3.78867	2.61519	3.71241	6.73753	6.57652	5.57279	3.33087	2.32184	3.67909	2.96968	4.83995	3.90205	520	2.58281	3.93314	2.57281	4.66377	5.78706	6.82668	4.12251	2.80694	6.31965	6.19524	6.57589	5.94835	4.5998	3.61957	2.89499	2.98458	3.85681	0.949317	5.45353	6.55267	7.97532	3.5645	2.52769	1.08631	0.0877303	-0.981526	0.48323	3.70754	2.52761	3.86336
521	3.04128	0.339284	2.35685	4.12139	3.20223	3.48689	4.6854	4.85986	5.49383	4.22377	2.62531	4.58375	2.73131	5.91702	4.23991	521	3.37965	3.60163	0.373909	3.84945	5.68035	7.31561	3.55768	0.692951	5.25165	7.06309	6.22596	6.27471	4.84138	3.39577	4.20099	2.81177	4.07047	2.97188	6.58556	6.91873	7.68443	3.03204	2.62652	2.41256	-0.0549724	-0.686592	0.210746	3.3951	2.55055	3.03707
522	3.33688	2.11486	1.98141	3.41473	1.70629	2.57739	5.10328	5.04077	4.55009	2.61831	2.33238	5.63543	2.02268	4.85064	4.15431	522	3.93366	3.11597	1.60449	3.50964	5.79131	6.80531	2.65102	2.44053	5.3467	7.80873	6.64624	7.13342	4.13936	3.14692	2.9261	2.10863	5.03821	3.16456	5.23215	6.24025	8.45425	2.49662	1.47517	2.55366	-0.793181	-1.29733	-0.0416653	4.25697	2.11993	3.48107
523	4.372	1.28423	1.52951	3.22732	3.55539	3.12892	6.00819	6.85652	4.83882	4.78112	3.29984	4.90637	2.50375	5.82264	4.18723	523	3.36745	3.24459	3.26366	3.99343	5.94933	7.15122	2.61665	3.06972	6.03248	8.0559	6.14824	5.13676	5.21726	2.75043	3.55455	2.11144	5.30266	2.04295	5.43757	6.95664	7.45867	2.09897	3.09243	2.91834	0.795291	0.278531	-0.0699525	4.31247	2.52313	3.42821
524	2.51411	1.23277	2.63694	3.40073	4.01137	1.20142	5.58983	4.92908	5.10158	5.53108	4.83776	3.95796	2.39544	6.31084	3.94504	524	2.90896	2.65188	2.34096	4.05916	4.6881	7.09658	3.49433	4.27405	7.02153	7.58148	7.17	5.16269	4.37086	2.9753	2.76859	3.17655	5.13194	0.436128	5.93502	6.80822	7.54104	2.98113	2.27174	2.30326	-0.154116	-0.726089	-0.834021	3.7732	3.45379	3.63877
525	3.78869	0.755413	2.11116	4.58091	3.71972	3.24576	5.22472	5.04011	5.3252	3.63696	3.41293	4.88513	3.83133	6.19908	4.59058	525	2.35029	3.16819	0.718643	4.11677	5.82358	6.34716	3.24333	3.19968	6.81829	7.08309	6.33002	5.71367	3.27001	3.76804	3.77579	3.32656	4.90536	1.04863	5.91769	5.7668	7.44641	1.46285	3.28276	2.44851	-0.901111	0.532974	-0.202762	3.19883	3.97286	3.25981
526	2.44604	1.3171	2.01333	4.01557	3.40911	2.26197	4.05518	6.15269	5.04794	5.35595	5.03597	5.29205	2.81765	6.75275	3.93402	526	2.81538	4.02062	2.7593	5.12885	6.2644	7.43829	4.2887	3.96189	6.09769	6.88173	5.95925	5.20265	4.63485	3.50339	4.19233	2.46689	5.58056	2.94398	4.39728	7.34052	8.25028	2.56365	2.64081	1.68012	0.313137	-0.330225	-0.416077	3.15429	3.83227	3.16999
527	0.909878	0.877949	2.46146	3.15858	3.9446	2.66061	5.57981	4.35172	4.75662	4.58896	2.66364	4.35375	3.40163	4.46372	3.36773	527	2.16984	4.12009	1.94279	4.26435	5.46543	7.10193	3.75117	3.50872	5.77035	7.79893	6.23718	5.66824	5.05298	3.08367	3.10503	2.59551	5.23549	1.73126	5.58974	6.90635	7.99597	3.21166	2.45169	2.9904	0.203289	-1.11044	1.05118	3.78086	3.11796	4.27618
528	3.97817	1.94422	2.98876	5.45563	3.04039	3.50354	5.91906	6.50281	3.96935	3.43297	3.62372	3.71944	2.55714	6.34275	4.15471	528	0.961967	4.21226	2.50735	4.8604	5.93207	7.20506	3.94011	2.73164	5.74911	7.63243	6.54781	6.02782	4.88614	4.17375	3.49449	1.69992	5.28684	1.98432	5.94355	7.5196	7.48845	1.112	1.97909	2.28993	-0.173432	-0.805027	0.348853	4.11162	3.69264	2.9807
529	2.82751	1.0615	2.26105	3.96686	3.89881	2.76003	3.72615	6.17903	5.26721	4.48441	5.83278	3.54903	2.91939	6.29471	4.56424	529	3.30186	2.3128	2.54417	4.03413	5.65543	6.88989	3.12145	4.51644	5.65861	6.9027	6.21627	6.15614	5.24296	2.62233	3.7908	1.62638	6.44815	1.4653	5.1233	6.4466	7.35865	3.78478	0.515115	3.53247	-0.822081	-1.31875	-1.46753	3.80584	2.65978	3.59895
530	2.83469	1.73199	2.23593	3.87465	1.60049	3.39031	5.42254	5.74059	4.21212	4.78426	3.58565	4.69703	2.83754	6.25875	3.43374	530	2.49724	2.91686	1.79318	2.98195	7.10623	6.96874	3.68166	3.54521	5.70362	7.83757	6.28136	5.78662	4.46851	4.17839	4.20217	3.52546	5.07823	3.09826	6.39845	6.85805	8.04003	2.63427	2.12647	2.25407	0.316156	-0.622579	0.111604	4.33153	2.95787	3.30299
531	3.89521	1.34318	1.82252	3.70895	4.99626	3.42014	5.49832	5.49522	5.5824	5.66854	3.06343	5.48709	3.98028	6.03512	4.07428	531	3.06386	4.47732	2.07665	4.13184	6.27531	7.01207	4.40685	2.99946	5.90248	5.79348	5.90698	5.45007	4.08711	3.17067	4.42004	3.00544	4.47015	3.04545	5.12845	7.41696	8.12623	2.77348	2.1385	2.40991	-0.338365	-0.887328	-1.57787	3.98083	2.26003	3.01424
532	1.46967	0.641671	2.46269	4.28454	3.6245	2.74068	5.58286	3.59568	4.7691	4.62791	2.44856	4.76102	3.50048	5.75475	5.8534	532	2.14859	2.3392	2.44671	4.78097	5.73562	6.33393	4.16823	1.34352	5.48194	7.57486	6.13151	5.21802	3.51635	4.37288	4.07332	2.70371	4.41003	2.26931	5.65385	7.22515	7.56143	3.83817	2.24702	1.29712	-0.340221	-1.08894	0.168716	4.46256	2.99075	3.96885
533	3.75747	1.80867	1.54471	3.74277	3.53739	2.2522	5.68857	5.00298	4.5275	3.82978	4.05868	5.32144	3.22988	6.15081	4.55928	533	2.79208	3.21229	1.46212	4.67963	5.79557	7.15833	4.28001	2.96535	4.72039	6.83265	5.70487	7.28479	3.61159	3.13699	3.22411	2.7417	5.42496	1.98634	5.98231	7.25092	7.46087	4.4742	2.09674	2.29302	0.226256	-0.178335	-1.0077	4.06539	2.55033	3.81104
534	3.095	2.03208	2.3109	3.46928	2.92039	2.89344	4.5129	6.1454	5.37262	5.01434	3.46674	5.30908	4.03229	6.7865	4.67487	534	2.85531	2.99527	2.32829	3.53406	5.51781	7.5707	3.23643	3.71465	4.81469	7.1047	7.88948	6.39102	3.89744	2.86031	3.67167	3.1145	4.32056	1.70619	5.50225	7.40506	8.71501	4.01309	0.803533	2.63805	-0.260665	-0.386619	-0.387855	4.04578	3.38275	3.1434
535	4.02279	2.00697	1.51733	2.98332	1.78372	2.03033	5.14057	5.45447	6.08557	4.22364	4.65315	4.47045	3.5264	6.8968	4.48703	535	2.46198	2.35518	1.93998	4.34436	7.36765	7.14858	5.47764	2.26153	4.88217	6.77078	5.82571	6.51033	3.75939	2.75313	4.41093	3.44261	3.95621	1.66302	5.30234	6.82923	8.03813	2.39361	2.12818	1.46173	0.180171	-0.459718	-0.865487	3.51628	3.14698	3.41943
536	3.19384	2.31207	2.3608	3.17024	4.30385	2.11915	2.85641	5.60473	5.13351	5.40042	3.00213	4.53829	2.12058	7.10958	4.23041	536	2.50711	3.55263	2.12902	4.20715	4.82025	7.22231	3.46447	4.23293	6.0796	6.47286	6.61395	5.1351	4.03596	3.69701	4.58095	3.03052	5.2878	2.45911	6.271	6.67203	7.80347	1.81309	1.62506	2.50866	1.04721	-0.777092	-1.37754	5.18249	3.09094	4.19731
537	3.6816	2.14703	2.68397	3.56851	3.80983	3.32506	5.73035	6.67324	6.63061	4.2934	3.93808	3.91782	3.66657	7.21309	4.63258	537	2.71171	3.28719	1.38062	4.44655	6.92219	7.12094	3.6455	2.79765	4.72919	7.37152	7.03965	5.52215	3.78411	3.39244	4.13901	3.20947	4.73736	0.96133	5.08439	6.81765	8.66968	3.35589	1.20076	1.4192	-0.667862	-0.404643	-1.47927	4.27891	2.67873	3.40324
538	3.61028	2.05759	2.0956	3.57705	3.32451	3.48674	5.37817	5.07971	5.32103	4.90668	4.41627	5.64082	3.64845	5.85181	4.65258	538	2.66174	3.11702	1.85685	4.77328	5.94491	6.45249	3.81464	3.56257	5.91171	6.6539	6.61069	5.5659	3.25277	4.34912	3.77523	3.25767	4.90371	3.05269	5.68761	6.82237	7.89078	2.63521	1.98248	1.42541	0.314433	-0.711092	0.761891	4.10644	3.15099	2.7493
539	3.63074	0.818782	1.95526	4.2423	3.2583	3.00966	5.50451	5.66376	4.47042	5.0836	3.46002	5.63712	3.79036	6.18463	4.14689	539	2.73181	3.34554	0.862208	5.43284	6.2186	6.83527	4.62412	2.24282	3.97767	6.98628	7.3692	4.82136	4.02743	4.03509	4.09053	2.98098	5.1897	2.08053	5.08781	6.49204	7.88063	3.77164	2.38101	0.865517	-0.642892	-1.8031	-0.115588	5.26479	2.35326	3.24318
540	3.93675	1.96008	1.22169	3.65179	4.43656	1.47432	5.7209	6.29391	4.07993	6.34937	3.3193	5.02771	3.81879	6.28392	4.62855	540	1.12507	3.17908	2.05755	5.21108	6.16306	7.09483	4.09865	2.32483	4.73176	7.3726	5.77796	5.68798	4.32925	3.27178	3.97044	2.55378	4.80631	2.2895	5.69889	6.2213	7.07608	4.88898	1.13924	3.07017	-0.535133	-0.407261	0.58354	4.99147	3.34699	3.09332
541	2.21141	3.10259	2.26846	4.05326	4.19855	2.83462	4.57569	4.80019	5.45671	5.25478	3.29321	4.58267	2.70361	7.45391	4.38097	541	3.14738	3.73745	1.85644	5.08972	6.21674	8.18446	4.27958	3.31769	5.87104	7.81974	7.77498	6.49536	2.9028	3.30121	3.11118	2.56794	3.60062	2.63651	5.24063	6.84469	8.24059	2.70446	1.48844	2.65802	0.717567	-0.303516	-1.03764	4.50443	2.92289	3.5327
542	3.35534	1.69916	2.41734	4.09531	3.79607	2.40459	4.41416	6.04295	3.99807	4.12315	3.53502	5.30797	3.28506	6.04584	2.50231	542	2.44224	2.85017	2.37856	4.24359	5.96078	7.48727	5.59911	2.60018	5.57504	7.06519	6.70916	6.40076	4.34774	3.85552	4.25063	1.6433	4.46692	2.24172	4.11051	5.99774	8.10551	4.00327	2.65207	1.18878	0.226426	-0.976881	-0.996117	4.29275	3.2886	4.52035
543	4.89918	0.93982	2.16099	4.09467	4.12283	3.44367	5.03584	6.03171	4.14756	6.58528	4.24061	4.27468	3.28923	6.65435	4.1598	543	3.12653	2.76897	2.79749	4.00141	6.90277	7.6136	3.61335	2.52606	4.49009	6.96908	6.52425	6.03449	5.13025	4.18462	3.82938	3.36508	6.0079	3.97342	4.93631	6.80027	8.13803	1.54387	1.70711	1.98799	-0.240309	-0.612073	0.273624	4.74886	2.87214	3.60011
544	3.01171	1.23403	1.75867	3.69237	3.55839	2.19895	5.9395	3.40036	3.87198	4.16896	3.86196	5.61107	3.30915	6.26901	3.54093	544	1.68254	1.58235	2.17098	5.40967	6.61765	7.24123	3.34602	1.38159	5.13167	7.16063	6.10681	6.5425	4.58327	4.19097	3.87482	3.1661	4.48654	2.11273	5.4729	5.76753	8.24905	3.80772	1.96663	1.57909	0.600446	-0.617983	-0.251248	4.39815	3.35799	3.60354
545	3.63827	1.7024	2.55657	3.73136	2.99257	3.06389	6.06221	5.52987	4.43245	4.2909	4.35052	3.97689	3.53003	7.15352	4.52295	545	3.24051	3.25051	2.02805	3.81903	5.67229	7.04822	3.4262	2.51992	5.52176	7.92418	6.58942	5.45675	3.96237	3.51604	4.20852	3.0107	4.83098	2.85755	5.41623	5.91398	7.54863	4.55983	1.32035	1.59519	-0.453677	0.0222455	0.723003	3.56602	0.95483	4.05951
546	3.90444	0.831725	1.75945	3.84804	4.24658	2.67297	4.95779	5.90315	5.13096	3.95669	3.7377	4.13562	3.74128	6.28471	4.38266	546	2.4406	4.09905	2.59344	3.95096	6.31437	7.49092	6.30378	1.78421	5.10075	8.03391	5.48491	5.76948	1.5425	3.92679	4.4071	2.62058	3.72152	2.19208	5.75409	6.07347	7.14137	3.89043	1.70995	1.70319	0.918939	-0.281581	0.320433	4.59622	2.85872	4.72477
547	3.70054	1.70368	1.98126	4.19229	3.60068	2.46693	5.04005	5.74455	3.26701	5.46794	3.65205	4.53401	3.87467	5.66099	4.23179	547	1.92633	3.36375	1.7604	4.92551	5.55675	7.14971	5.16498	2.78353	5.51747	8.1661	5.90911	5.89536	3.66918	5.14047	4.11958	2.37936	3.80643	2.85667	5.53398	6.35864	6.94746	3.4134	3.08117	1.86895	-0.704989	-1.21742	-0.260378	4.62493	1.92038	3.74911
548	3.52187	1.26817	2.00073	3.8634	3.58637	1.95094	4.31056	4.86029	4.12141	5.18645	3.38752	5.5397	3.33942	6.41421	4.47705	548	3.73084	2.77719	2.22978	3.89347	4.97238	7.30975	5.41167	2.36434	3.98751	7.1708	7.60278	5.82957	4.60203	3.16221	4.37096	3.57882	4.38762	1.78872	4.32701	6.55504	7.77014	3.23909	1.18425	2.14528	0.0307413	-1.42418	0.558245	3.10512	3.39511	3.718
549	3.71188	0.822105	2.97969	3.0657	3.19067	3.21638	5.90334	4.92794	3.78049	4.13251	3.31635	5.28234	3.32584	6.47906	5.08226	549	2.80385	3.82836	0.900945	4.67705	6.05587	7.30069	4.58039	2.4444	5.67586	7.29119	6.876	5.10081	3.20282	3.32709	4.59698	2.76072	3.95093	2.69155	5.21946	6.47588	6.16516	3.96837	1.71332	2.1987	0.845971	-0.601043	0.817567	4.45219	3.80376	4.23296
550	4.11161	1.32458	1.94747	3.15928	3.60029	2.04324	4.07303	7.1868	4.98656	5.30678	1.72226	5.81907	2.60981	6.54798	4.29186	550	2.30405	2.31605	0.942478	4.86279	6.47463	7.39524	4.85941	3.56984	4.33985	6.75716	7.17076	5.36253	4.79315	3.71506	4.47619	3.08074	4.73151	2.47508	6.28054	6.49566	7.83667	2.6493	2.21178	2.2268	-0.453017	-1.51652	1.11893	4.25887	1.11589	4.26283
551	2.1881	2.03728	2.51522	4.09647	3.85227	2.9588	5.92481	5.30097	4.67393	5.70517	4.35874	3.48307	2.7521	5.99437	4.92472	551	3.40538	3.36267	1.24792	6.03375	6.38375	7.10327	5.77108	2.5319	4.6013	5.87316	6.67007	6.10859	3.95123	3.62414	3.73471	2.30795	5.31483	3.62875	4.93531	6.37472	8.6518	3.84471	2.74278	2.75377	0.0667956	-0.942156	0.022871	3.7599	3.78543	4.29534
552	2.15006	1.96243	2.49321	3.56332	4.00938	2.7373	5.62411	7.11644	6.69052	4.47939	2.28822	5.88169	2.44669	6.16104	4.32877	552	2.58474	3.00097	0.994546	3.72668	6.29203	6.51897	4.68736	2.63528	4.57639	7.15124	6.54127	5.17267	3.92061	3.93201	4.20416	2.38035	3.72102	1.74858	4.78322	5.79587	8.85955	3.57577	2.30661	1.71187	0.272165	-0.525115	-1.94351	4.65831	1.33558	3.85935
553	3.40633	2.01048	2.10402	3.65679	1.73135	2.50307	2.8831	6.25004	4.6637	4.66555	4.21556	5.31396	3.68865	6.8915	4.52831	553	2.71134	2.19838	2.10628	4.84408	6.33162	7.09954	5.08702	3.35747	5.65166	7.28511	7.11184	4.92235	3.35487	3.34381	3.90482	2.84932	3.30295	2.08864	6.49745	5.73104	7.32085	2.49479	2.29593	2.1218	-0.229296	-1.26239	-0.752981	4.76939	3.98748	5.06169
554	3.32233	1.62351	2.4531	3.63783	3.01196	3.17192	6.11716	4.70915	3.8956	4.54293	4.18019	3.31985	3.29188	6.86606	4.18505	554	2.36141	1.78053	2.04464	3.93948	6.57809	7.1065	5.35742	3.54319	5.10573	7.45408	5.70688	6.4934	3.77824	3.58991	3.76763	2.973	2.38192	3.23072	5.07974	5.74112	9.02186	2.93825	2.85025	1.99457	-0.335878	-0.7641	-0.797454	5.70539	2.57471	3.69497
555	2.77526	1.91629	1.79035	4.54704	3.68294	3.03336	3.88379	6.16214	5.07632	5.39133	3.39411	4.66349	4.11664	6.49924	4.31826	555	3.04071	3.22355	1.43236	4.78831	6.50231	7.15717	4.60156	2.22362	5.84021	6.63074	5.75849	6.31328	3.46589	3.36587	4.18315	3.22501	3.31426	3.02767	5.96164	5.97943	8.30211	3.98679	1.82986	1.15615	0.675901	-1.64063	0.643107	5.11323	3.99511	4.68463
556	2.40823	1.87053	1.96949	4.38381	4.00722	2.84502	6.24572	6.65801	3.12832	4.39072	4.7919	2.71059	2.82439	7.523	4.30602	556	2.44046	3.77839	1.13904	4.32138	7.28899	7.40506	4.69944	2.62645	4.68176	8.00026	6.84513	5.00192	2.81729	3.83561	3.90089	1.75488	4.80884	2.17823	5.38376	6.13596	8.1357	2.68193	1.81674	1.90269	0.362203	-1.14158	0.391083	4.52218	1.49262	3.92961
557	2.96224	2.70076	1.9959	3.39402	3.54384	2.26153	6.14653	4.38301	4.25813	6.07799	2.60555	4.01291	3.25238	6.89396	4.01485	557	3.0773	1.94802	0.475883	4.45384	6.89397	7.19386	5.62959	3.24624	5.90599	6.57065	6.71801	5.04199	4.53231	4.23872	4.68887	2.7815	5.29228	0.739484	5.05331	5.70261	9.18755	3.73318	2.6588	2.12412	0.11645	-2.38238	1.59234	4.42067	2.99706	3.42535
558	2.01152	1.87836	1.66487	3.84794	3.76599	2.69264	5.23795	4.42775	3.80688	4.02743	3.72964	5.38412	3.55859	7.19742	4.17821	558	3.78411	2.96075	1.756	3.92073	6.90919	6.39843	5.8403	3.55786	5.39597	8.10188	6.39384	5.32025	3.84874	3.06486	2.85732	2.68171	3.18929	2.53727	5.28395	5.9262	8.02828	4.1889	2.21814	1.62082	-0.486048	-0.196885	0.298398	4.26066	3.55821	4.03462
559	2.34046	1.78537	0.745274	2.94638	2.92367	3.08952	4.66677	4.91744	3.69244	5.75085	3.60194	5.26659	3.20542	6.39065	4.85025	559	3.23419	2.688	1.70456	3.92222	6.38001	6.77008	5.06526	2.50179	6.58535	7.49324	6.24704	5.36581	5.14051	4.27855	3.92214	2.29227	5.10568	1.95048	5.9786	6.12314	8.62385	3.41518	1.23778	1.83474	0.229275	-2.02094	-0.315647	5.00761	3.84378	4.06703
560	3.56142	3.5602	1.64613	3.89338	3.53878	3.26149	6.22816	5.66504	4.38978	5.99252	3.85642	5.6039	4.2715	7.25551	4.08215	560	2.4673	1.96158	1.56407	4.00353	6.57362	6.76712	4.36552	2.85748	6.48768	5.6466	6.21496	4.98102	3.84815	3.73542	4.21291	2.64047	4.44169	2.12681	5.56341	6.52871	8.73334	1.42457	1.93606	0.889212	-0.172525	-1.02706	0.138	3.38268	3.83043	4.01282
561	4.38987	1.93935	1.9064	4.21425	2.20243	3.41661	6.15634	5.98962	4.42678	5.30009	3.62743	4.81729	3.33206	6.23571	3.94472	561	1.84857	2.63851	1.63565	4.99568	6.49	5.99609	5.05397	2.26644	6.91016	7.27392	7.24202	5.15633	4.07422	5.57183	4.10171	2.70033	5.10075	1.94148	5.08743	6.77954	7.90771	4.43428	1.83199	1.93256	0.991351	-1.52452	0.257194	4.61848	3.1787	4.37715
562	2.87247	1.17264	1.63745	3.02147	2.90557	3.8216	4.18274	6.91278	4.63464	5.18833	2.59293	5.5648	4.13628	6.58187	3.9797	562	3.48095	2.59371	1.21441	4.41841	6.67163	6.00779	4.67136	2.96529	4.8579	7.18552	6.10913	5.93455	3.75986	3.44739	4.11249	2.22994	3.31311	4.01621	4.56369	6.30944	8.9619	3.4198	1.43024	2.47641	-0.477208	-0.599143	0.457924	5.73093	2.64964	5.28596
563	2.12195	2.48446	1.75336	3.52203	3.21536	3.16026	4.96199	4.55183	3.32256	4.71483	4.45392	4.51947	3.14727	6.49941	3.08336	563	2.32	2.86543	1.69519	4.00754	7.34371	6.71844	6.14463	1.5917	4.97425	6.38097	5.24633	5.73796	3.43985	4.98899	3.14886	2.80277	5.60868	1.51799	5.06817	6.50717	8.86796	3.49808	1.49633	2.0147	0.0499718	-2.71919	0.558724	4.71863	2.81957	4.30101
564	3.25415	2.42568	2.148	3.6401	4.0478	2.82257	5.83962	5.34825	3.93801	5.67237	3.73009	4.41314	4.17153	6.11573	3.60761	564	3.34613	4.56816	2.03355	4.0227	7.13717	6.6532	4.95255	3.61134	5.62852	6.65337	6.67152	5.37142	3.91739	4.28096	4.44935	3.12315	3.73611	2.47216	4.77633	6.7649	8.59059	4.26459	2.46223	2.16532	-0.0156569	-1.46253	-1.47714	3.95333	3.14696	4.71589
565	0.139983	1.62423	1.40439	3.97596	4.05303	3.03901	4.85534	5.37088	4.45767	4.27443	3.78295	4.50816	3.53479	6.87754	3.93098	565	2.67567	2.20248	2.30347	4.73435	6.61886	6.41368	4.91992	3.20959	5.58	7.2358	6.79987	4.95386	4.12085	4.15683	4.2526	2.47004	4.45368	1.59149	5.08408	6.71827	8.62513	3.06398	0.695841	2.02795	0.360561	-1.11413	0.553059	4.3119	3.60487	5.03137
566	2.45187	2.795	3.05566	3.49554	3.80332	3.22497	5.91416	4.49558	4.32852	4.81599	4.17047	5.15807	2.85136	6.07669	3.9562	566	3.38953	1.70979	1.38815	4.91409	5.43161	6.02903	4.7738	2.40561	4.53021	6.27002	6.49737	6.41477	5.0367	4.44286	3.09121	1.83809	4.94514	1.09789	4.43642	6.14116	8.33467	2.05268	1.15784	1.75587	-0.548463	-0.38043	-0.0190933	5.21617	3.71535	4.71786
567	0.866764	1.20212	2.30727	3.41248	4.33635	2.61885	5.21115	5.35946	4.85159	5.73489	4.84802	4.32594	3.57781	6.83164	3.32969	567	2.25098	1.80503	2.80358	4.20362	5.71968	6.63257	4.76777	1.0675	5.72829	6.79605	6.06111	5.23836	4.02248	3.99287	4.3208	2.70791	4.5174	1.99792	5.3492	6.05782	9.59837	2.5045	1.37546	2.31173	-0.253791	-2.28761	-0.617925	5.01437	2.37662	3.59254
568	2.62073	1.14249	1.09503	3.90883	3.30262	3.51367	5.17771	4.0336	3.37206	4.65824	3.55331	3.11594	2.98567	7.17154	4.22986	568	3.0107	1.61513	1.85571	3.77546	6.50624	5.98838	4.85583	2.31928	5.79703	7.28161	5.87341	5.44586	2.60524	3.79039	5.15265	2.22183	4.36147	1.60217	5.50451	6.16705	9.18118	2.77423	0.79976	1.44441	-1.01424	-0.785577	-0.224634	4.27887	3.07516	5.48103
569	2.81481	1.82843	2.32079	4.02361	3.37279	3.02255	5.3004	5.45912	4.75124	4.18445	4.49259	4.98446	3.81242	5.09043	3.85325	569	3.31597	3.03269	2.64705	3.90652	6.60221	5.78214	5.29684	2.08753	4.55134	6.86804	6.13082	5.66767	0.892734	4.64145	4.10053	2.45241	4.75603	1.13842	4.23462	6.19753	7.8791	1.76273	1.42718	2.28054	-0.282112	-0.693262	0.933854	4.37339	3.08695	3.92
570	3.19494	1.14535	3.12328	4.39397	4.36648	3.62087	5.17531	5.05104	4.5234	6.0155	5.33071	3.65483	3.23115	7.32074	4.73332	570	3.55765	2.59907	1.46941	3.72212	6.74416	6.67143	5.42747	2.9821	4.92209	6.65589	7.22204	5.36335	4.55213	4.21192	4.94929	1.72594	3.27488	1.60857	4.05684	5.64594	8.32058	1.5151	1.16835	2.68637	-0.63964	-1.28312	0.144903	5.86021	3.7336	3.50544
571	2.67841	1.24467	1.68286	3.59974	3.39798	2.66322	4.02381	4.81351	4.9482	3.83393	3.5552	5.34966	3.90673	6.74433	5.41492	571	2.28851	2.52091	1.96586	4.26404	7.46899	5.77896	5.37587	2.64598	5.65096	6.98686	6.52866	6.01671	2.34363	3.74457	4.96366	2.73668	4.75623	1.56253	4.7636	6.72001	9.17079	3.06298	1.46151	3.01982	-1.03693	0.196246	-0.151739	4.75018	2.92323	4.984
572	3.5762	2.35517	2.75926	3.69959	4.19638	3.00038	5.49454	3.98061	3.56972	4.99065	4.54266	4.64986	2.09611	7.24493	3.85681	572	2.11477	3.03135	1.5238	4.67071	7.16908	5.6753	4.25991	3.13075	6.3359	7.2866	6.22845	6.01784	4.01141	4.1287	3.945	2.43785	4.19532	0.883783	4.6119	6.91821	8.47691	4.7204	2.21142	2.0303	-0.460157	-1.08834	0.225157	4.93141	3.48149	4.77074
573	2.4003	2.74653	1.60611	3.26532	5.2115	3.84574	6.809	5.47528	4.87147	4.71421	4.25113	3.43481	3.20678	6.5239	3.34143	573	3.19195	0.468432	2.17387	5.07676	6.02347	5.75485	4.68289	1.5518	4.72985	8.04471	7.49814	6.12718	2.88975	5.09289	3.90934	2.89487	3.88541	1.26492	5.27308	6.04034	8.86617	3.10943	1.62475	2.28083	-1.00907	-1.204	-0.516229	5.0865	3.32868	4.56252
574	2.71785	2.28603	1.94719	2.6896	2.9195	2.6566	5.02688	6.22979	3.89931	5.06404	3.21508	5.71788	4.42814	6.68542	4.61692	574	3.00626	2.87959	1.97021	4.99059	6.7452	6.55469	6.13835	2.70982	5.46614	7.06251	5.09929	5.73284	2.89487	4.37884	5.21981	3.3349	4.90499	2.04993	5.37365	6.64833	9.13888	3.02462	1.862	2.23465	0.143148	-1.83843	0.144369	4.91344	3.36243	4.71198
575	3.94045	0.415325	2.22186	3.42726	4.01736	2.13493	3.9643	5.61496	4.09182	4.79927	5.16372	5.1253	3.72714	7.17567	5.81485	575	2.93496	2.46116	2.34096	4.16274	7.7357	6.76953	5.41725	2.9521	4.71215	7.76051	7.30713	4.56061	3.61399	3.93952	4.86502	2.60024	4.9375	2.77106	5.09069	6.19239	7.63592	1.32202	2.16074	1.96339	-0.166767	-1.37806	0.311041	4.68099	3.61489	4.35919
576	2.77001	1.0513	2.06666	2.60474	3.96902	3.29207	5.2158	5.88327	4.32385	5.12465	4.27029	5.4326	2.32154	6.84653	4.49709	576	2.97816	2.51308	2.21219	4.48195	6.81837	6.56801	4.86573	2.57075	7.53046	6.31782	6.70107	5.12673	4.2304	3.93661	4.46207	2.54738	5.10705	1.84503	4.42773	6.43481	8.87899	4.12896	0.436168	2.42273	0.192371	-0.644301	-0.162409	4.97525	3.27073	4.85713
577	3.18902	1.63185	2.41565	4.16017	4.12825	2.7286	5.15275	6.35499	2.54991	4.76505	3.79333	5.36025	4.29948	7.6706	4.65118	577	2.42179	2.33724	2.29046	4.23087	5.93457	5.95642	3.46696	1.04774	6.13359	7.68021	5.51594	5.73061	3.00503	5.42171	4.30679	3.34038	4.96485	1.3293	4.86786	6.7027	8.42875	2.08856	2.65021	1.93087	-0.370812	-1.41468	0.576087	5.30085	4.04498	4.52898
578	2.65155	3.32916	3.01737	2.29789	3.70588	3.85658	4.60195	4.97724	3.87016	4.93908	3.35113	6.41361	4.42564	7.11319	4.37365	578	1.12166	3.42097	2.29286	4.01573	7.39988	6.88146	6.17483	2.13456	5.41052	7.43373	7.0952	5.19234	3.53458	3.31217	4.19057	3.42872	4.75882	2.57741	4.88818	5.90053	9.23278	3.35263	2.33741	2.18871	-0.0851213	0.0701792	0.0532656	5.17568	3.51601	4.02585
579	4.10021	2.16648	2.3814	4.40648	4.03792	3.66115	5.30179	6.02531	3.86039	4.37228	3.93727	4.90648	4.19423	6.81053	4.7965	579	3.03523	1.92983	0.456861	4.36199	7.76486	6.01415	5.53023	2.38374	6.00819	6.2503	5.66319	5.13299	3.22563	3.6598	4.41305	2.46715	3.54	2.59807	3.86014	6.25065	8.868	2.35731	0.538828	1.09596	0.310816	-1.45321	-0.521568	5.12251	4.05729	5.12111
580	2.49353	2.51471	2.08762	3.7586	3.44524	3.00192	3.51921	5.9162	4.80156	5.25045	4.42221	4.55786	4.17344	5.99591	4.75227	580	2.84295	2.63151	2.34522	3.73569	7.81639	5.99789	6.43978	3.02271	4.69955	7.28534	5.77703	4.92139	1.89369	4.42514	4.87814	2.41362	4.20342	2.37504	4.97393	6.20468	8.81514	0.580283	2.20416	1.97041	-0.16746	-1.58239	-0.295206	4.59479	3.33774	4.70634
581	2.27334	1.41876	2.59802	3.58135	3.52623	2.98181	4.65611	5.96049	4.37059	4.86272	3.20758	4.19921	3.33658	6.79952	4.11818	581	4.13593	2.23221	2.20078	3.35632	6.75009	5.69607	5.6004	1.1009	4.99863	7.38934	6.45547	5.8173	2.90325	4.52227	4.91517	2.8904	4.01928	2.17831	5.1112	6.69297	8.98971	3.07401	1.07387	1.81315	-0.308188	-0.945497	-0.422564	4.47451	1.34869	4.04893
582	1.9442	1.58832	3.13611	3.68077	4.02103	3.59181	5.37209	7.04626	4.49246	4.30909	4.40459	2.64807	3.56924	6.10303	3.5218	582	3.06396	2.43344	1.74387	5.19311	7.6534	5.8707	6.17441	2.02471	6.74027	7.19153	6.49917	5.86894	4.23481	3.3207	5.44083	2.27569	4.41818	2.2102	4.15059	6.51011	9.32898	3.58564	0.353652	1.00085	1.22571	-2.61044	-0.047666	4.03137	1.91267	3.01087
583	2.5929	1.88054	2.37557	3.42565	4.26561	3.30792	5.84448	6.2208	3.02882	4.54614	3.44199	4.56631	3.15503	7.40151	4.15271	583	2.72386	2.73031	2.07733	3.52765	7.45869	6.01538	5.79537	2.76898	5.69266	8.22605	5.29375	4.46834	3.92144	3.86362	4.80384	3.88895	4.68339	2.69341	4.95359	5.58198	8.8603	2.48116	0.0330442	1.28542	0.534466	-1.47683	-1.07958	5.23396	3.45177	3.70705
584	3.18861	1.51905	2.13771	3.57737	3.27247	1.58763	6.24541	6.07068	3.52761	5.75586	3.96078	4.90017	4.19265	6.85059	4.34178	584	3.22537	2.64806	1.40165	4.30781	6.57868	5.64361	6.56042	2.10619	4.35412	7.09478	6.42247	4.01376	0.788523	4.5156	4.55646	3.46584	4.73701	1.90738	5.75073	6.56958	8.75324	0.114212	0.653277	2.27646	-1.04418	-1.37959	-0.141041	5.5705	3.53784	4.228
585	3.3408	1.35775	2.70559	3.26151	4.37653	3.2318	4.35493	6.20629	3.43996	5.38758	3.8805	5.13295	3.65191	6.27649	5.02132	585	1.90716	2.54326	2.96307	4.40489	7.59966	5.47191	4.74478	2.28328	5.76863	7.37111	6.55892	6.10632	2.88602	4.85243	3.6443	3.07597	4.15654	1.28393	5.26945	6.03522	8.14673	3.01072	0.910145	2.338	-0.657589	-1.59847	0.913588	5.46521	3.69284	5.37826
586	3.18427	2.53537	3.29543	3.55258	4.55969	3.69698	5.00925	5.37639	4.60171	4.18911	4.53539	4.64106	4.86076	7.09087	4.22413	586	3.0682	2.63055	1.83809	4.65237	7.1542	6.82226	6.81109	1.74524	5.31611	7.99521	7.02599	5.30581	3.74699	4.01233	5.31216	3.77288	4.28768	1.28857	4.47147	6.74756	9.01266	3.67312	1.46365	1.74247	0.184144	-0.010371	-0.0960939	5.03123	2.41584	5.16915
587	3.42327	0.511638	0.65691	3.41944	4.04659	3.51335	6.70659	5.32332	4.3469	5.52066	4.10975	3.8775	4.07397	6.35956	3.96993	587	3.33631	1.99814	2.70293	4.78005	6.87619	6.28619	4.81562	2.64107	6.14251	7.52873	6.27712	5.16096	2.2978	4.63868	4.36199	3.14639	3.44675	1.14067	4.02063	7.33144	8.67971	1.30246	0.777959	1.98736	-1.0349	-1.52014	-0.100022	5.32923	2.49619	4.44334
588	2.82469	2.47997	2.52217	3.41911	4.80925	2.23229	5.04877	5.90978	3.74967	4.85589	4.08734	4.20376	3.20714	8.15519	4.99391	588	3.23471	1.98584	1.21266	4.10348	6.33468	6.57748	6.33954	2.13408	5.4139	6.87808	4.95182	5.23041	2.47759	3.85395	3.74476	2.42476	3.96569	1.95443	4.33692	5.89209	9.40019	2.2338	1.6643	2.85764	-0.47089	-1.01565	-1.33704	4.79068	2.73454	4.30924
589	2.62956	2.50873	1.18447	3.5815	3.24949	1.97288	4.42531	6.32667	3.95811	4.59646	4.23241	4.57102	3.71985	5.99169	3.91627	589	3.24072	1.43117	1.16081	4.17464	9.19331	6.07765	5.52439	2.63837	5.60974	7.73835	5.75541	5.93152	3.71046	4.17643	5.30911	3.08962	5.06521	2.62961	5.00477	5.8856	8.64865	1.76586	1.37346	2.37289	-0.702193	-1.24232	-0.0130628	4.63279	3.60411	5.44854
590	2.12192	1.58463	2.28834	3.57895	2.90501	3.77981	6.27476	6.2266	4.42765	5.04999	4.04911	4.78393	4.34177	6.19065	3.36956	590	3.54566	2.39641	2.04061	4.32485	7.71091	5.33517	5.82063	1.94318	3.3902	7.61506	5.91101	5.84698	3.58148	4.72392	5.0413	2.99425	3.66644	2.84154	4.85073	6.33057	8.56957	2.25568	1.73783	1.96229	-0.203068	-1.57717	-1.08256	5.8704	3.35021	5.60024
591	3.2541	1.47175	1.56793	3.86049	5.30833	2.12662	5.05604	6.77442	4.70366	4.61351	3.18185	3.81465	3.43886	6.48271	3.75004	591	2.92993	1.44153	1.20036	3.9609	6.89247	6.6156	5.62044	2.28583	5.39518	7.23547	6.35584	5.62953	3.33549	4.67101	4.77058	2.28734	4.21164	2.25759	4.34356	7.06064	9.46071	2.28194	0.452072	2.08988	-0.712451	-1.93855	-0.279507	5.54381	2.96192	5.23177
592	3.45223	2.34907	0.711336	4.38435	3.64611	2.31065	5.84956	6.36163	3.27957	5.02104	3.8238	4.39499	3.8182	8.07685	3.95741	592	2.87847	2.10014	3.06392	4.29915	7.51103	5.29006	5.69366	1.79387	5.14221	6.55733	5.24283	4.31664	3.4973	3.82206	4.15447	2.79016	4.41871	2.3346	4.2936	6.90293	9.54618	3.46131	1.20043	2.25452	-0.185015	-1.828	0.647138	5.4398	3.8548	4.61256
593	1.78022	1.44449	3.27968	4.20815	3.99564	3.3575	5.54598	5.23663	4.95353	4.91674	4.58809	3.68852	4.36759	6.66714	4.36522	593	3.07606	1.8299	2.19486	3.36702	5.97451	5.97929	5.88049	3.60487	4.29446	6.91489	5.41197	6.2131	2.76661	4.90667	3.93497	3.05398	4.01374	2.78425	4.29844	6.81396	9.00303	3.37623	1.05401	2.53001	-0.728554	-0.27644	0.248289	4.71131	3.88388	4.8675
594	3.80326	1.85276	2.45462	3.76115	3.90037	2.56964	5.01733	5.78721	3.91606	5.48568	5.89582	4.30963	4.44549	6.61645	4.63929	594	4.06447	2.75375	1.66685	4.0833	8.39768	5.60165	5.3892	1.68964	5.94208	6.30236	6.79867	5.61718	3.73598	3.75592	5.12599	2.82034	4.03183	2.87344	5.80513	6.22664	8.89213	3.28583	0.768406	1.56533	-0.560658	-1.89763	-0.197935	5.37765	3.70423	5.08456
595	1.97274	1.31286	3.39443	4.03072	5.41388	3.06032	3.95782	5.97849	4.90707	5.41022	4.0451	4.09316	5.20512	6.53893	3.96906	595	2.83847	0.619033	1.7269	3.77238	7.62575	6.33734	6.08712	2.66204	6.07866	6.17242	6.70488	5.48023	3.2361	4.71691	4.94267	3.28741	2.34198	2.0331	4.73805	6.52494	8.94434	2.20554	1.64064	3.3011	0.793924	-1.75769	0.118885	4.58843	3.68519	5.06413
596	2.54283	1.41694	1.89606	2.58986	3.58926	3.09443	4.12701	6.05309	4.59935	4.9604	1.54518	4.7153	5.19939	6.46511	2.91315	596	2.77075	2.83451	2.60729	4.2103	7.42766	5.75271	6.6127	1.97619	5.47368	7.43688	5.57629	6.42338	2.98276	5.11933	3.19996	2.57662	3.61461	4.23159	4.36045	6.14172	8.67031	2.95705	0.302371	1.8073	-1.334	-2.00953	0.923187	6.49164	3.0974	5.09084
597	2.8955	-0.338362	3.0613	3.42764	2.36503	1.09218	3.38041	4.82664	5.16896	5.02952	3.55118	3.50386	4.23948	6.00602	3.77433	597	2.56535	1.8316	0.769952	3.31904	7.63416	5.82463	5.70315	3.58437	5.81879	7.47151	5.8499	5.51235	2.18987	5.21835	1.86329	2.02458	3.55829	3.71355	5.54248	5.61939	8.75503	2.80657	0.991054	1.34158	0.399036	-1.40141	0.305307	5.09872	3.86145	5.7091
598	2.81623	2.81553	3.14181	4.27006	3.68396	3.40086	3.42969	3.79819	4.68065	5.63372	4.94927	5.20933	5.28077	7.01061	3.4335	598	2.57075	2.50296	1.01165	3.55151	6.96935	6.03887	5.55406	1.72497	5.34811	7.0138	6.27909	5.52064	3.2626	3.84747	3.44967	3.93949	4.63303	3.86839	5.11156	6.03854	10.0437	2.22045	1.12989	2.26133	-0.451019	-1.79577	0.764459	5.81709	3.48984	5.36619
599	2.72138	2.57603	2.07496	3.50515	4.15672	2.70897	6.88616	4.69718	5.68011	4.67984	4.0769	4.13152	4.57741	6.12861	4.16364	599	3.36153	1.50651	1.2331	3.11582	7.60464	5.77736	6.25373	2.29794	5.33387	7.98666	6.58307	3.56644	4.0089	3.54542	3.63904	2.96384	4.011	3.62686	5.50188	6.19983	9.00327	2.23012	0.754237	1.303	-0.453691	-0.661569	-0.416586	5.82002	3.50912	5.08311
600	3.12831	2.31984	3.23804	2.82096	3.42929	3.66088	6.39474	6.49045	4.02234	5.76364	4.34916	4.63837	2.98574	6.73462	3.15047	600	4.05813	1.98319	1.75227	3.47536	6.65044	5.23373	5.49251	1.65596	5.75456	7.92739	6.67565	6.50233	3.45258	3.49764	3.83655	2.56798	3.66077	3.40287	4.20725	6.95624	9.05309	3.40573	1.62162	1.21544	-0.12429	-1.91831	-0.603072	5.27389	3.40925	5.12458
601	1.95941	2.81428	2.16482	5.09331	4.12568	3.71532	5.26668	5.65657	3.96359	4.96872	2.98536	5.44038	4.34478	7.27976	4.0629	601	3.33908	1.9458	0.64563	3.4264	6.79398	6.25011	6.42315	2.25073	5.35534	7.17894	6.12959	4.92977	2.62175	4.16314	4.38497	2.3209	4.57131	3.34177	4.66562	6.2311	8.60341	1.88022	0.430234	2.28396	0.325812	-1.93502	0.230694	6.1853	3.49742	4.99903
602	4.08572	1.81768	3.80635	3.65293	3.17747	2.97292	4.64718	6.27536	3.81324	5.48006	4.4218	3.47634	1.04885	5.66519	3.20936	602	2.29251	2.19724	2.57103	3.50937	6.38294	5.43669	6.66167	2.53152	6.30956	7.51209	7.1439	5.11246	3.39571	4.75616	4.45948	2.95774	3.51616	2.58782	3.65834	6.34954	8.47488	3.2557	0.714432	1.25797	-1.42262	-1.5186	1.01857	6.33926	3.05574	5.10366
603	2.60652	2.92195	1.67707	2.60838	3.12577	2.78355	4.99918	6.82052	4.96994	4.6998	3.56797	4.26119	4.62431	6.91005	4.03193	603	3.06284	1.65894	1.99395	3.52701	7.58332	5.52369	5.71413	1.99086	5.74757	6.31903	6.49108	5.92129	2.66638	4.1833	4.76445	3.64737	2.91438	3.66929	4.217	6.22344	9.49372	2.20946	0.923117	2.33415	-1.0023	-1.9599	0.38898	5.7589	3.98487	5.12208
604	3.6502	1.65507	3.27054	3.19137	4.02088	2.90453	4.30686	6.96192	2.85733	4.70382	4.21987	4.07935	4.48675	6.45262	5.18652	604	2.13763	1.48761	2.18308	2.73261	6.61025	5.23057	6.40045	2.07441	5.59196	5.63554	5.97312	6.57779	2.76192	4.32411	4.77275	2.03065	2.66369	2.82169	4.07623	5.81199	9.77113	3.91931	0.086829	1.57338	-0.0598192	-1.34107	0.32997	5.856	3.66941	5.22217
605	2.68195	2.10607	2.67129	3.78587	3.45286	3.26899	3.64744	6.32608	4.12608	4.4448	5.36316	3.95855	3.51211	6.19678	3.88698	605	4.15051	1.12875	1.87686	2.51182	7.86666	5.41416	6.13967	1.25149	4.43573	8.34958	6.19425	5.6582	3.56609	3.55201	3.66198	2.51382	5.25182	2.63598	4.82972	5.75423	9.81119	2.07858	1.03059	2.51604	-0.808661	-1.22892	1.87964	5.82173	2.41715	5.55968
606	2.78291	1.23454	2.50975	4.19216	3.51797	2.55035	6.18662	5.68033	3.52475	3.5894	5.6328	4.39938	2.9668	5.66426	5.03053	606	3.01252	1.71976	1.03115	3.43657	6.35106	5.42758	5.89599	3.04188	5.14419	6.86405	5.83217	5.34774	2.79447	4.41402	4.26751	2.88633	6.53631	3.07221	4.6623	6.43482	8.66821	2.13179	0.972881	1.37298	-0.295546	-1.82903	-0.27844	6.4225	3.6366	5.57382
607	2.17377	2.92208	2.25739	3.05984	3.80057	2.29497	4.80772	5.77288	3.50096	4.90674	5.41712	4.74309	5.01338	6.1881	4.69881	607	3.18954	1.99494	0.891478	2.418	7.84957	5.80281	5.50252	2.45241	5.58356	6.67816	5.24939	4.82976	0.712595	3.26286	4.03881	3.23252	6.41213	2.21365	4.26623	6.02766	8.56322	3.41017	1.11126	1.24458	0.470338	-2.23153	0.86485	5.14989	3.44364	5.52037
608	1.77567	2.62283	3.18754	4.34106	4.36152	2.31257	5.56876	6.97277	3.55495	4.27558	5.12488	5.39111	3.32989	6.7053	3.04259	608	3.41884	2.27048	1.84779	3.94408	7.00108	4.81946	5.10697	2.9855	6.11348	6.54105	6.29847	5.56298	2.34648	4.3191	3.88871	3.39123	5.22011	3.7115	4.31615	5.53154	8.50185	2.51371	-0.0411288	2.47821	-0.810341	-1.44814	0.62317	5.52557	3.13274	5.04435
609	2.66548	1.94528	3.08635	2.96896	3.58718	3.46749	4.95958	5.76464	4.09443	4.8318	3.27652	4.11808	3.86352	6.22615	3.9456	609	3.10794	1.77587	1.82557	3.58195	7.87524	5.32172	6.54345	1.03171	4.96784	6.55216	5.89058	5.19166	3.35774	3.37385	4.1326	2.97299	3.48362	3.57451	4.44307	7.17621	8.94796	2.71144	-0.152909	1.91951	-1.34649	-1.5512	-0.360432	5.79443	3.72512	5.22299
610	2.08101	1.67389	2.6284	3.47484	3.48063	2.7718	5.56407	4.29041	3.766	5.42559	4.24595	3.3016	4.29492	6.76607	3.27658	610	3.43267	2.00145	1.06495	3.32349	6.82313	5.52124	5.38784	2.49378	5.72933	7.27757	5.59049	5.93591	1.95456	3.57098	3.23661	2.19986	4.08425	1.83352	5.22171	6.59464	8.74222	2.80173	1.11708	2.2075	1.66202	-1.61819	0.303801	5.74162	2.663	5.28541
611	2.42692	2.59677	3.35855	2.65117	3.88381	2.65757	4.11571	6.60266	2.88299	5.23707	5.33001	3.64142	3.81883	7.1857	3.81871	611	3.4405	2.77947	1.93018	3.34391	7.04085	6.32332	5.86712	3.87281	5.96281	5.16419	5.58727	5.13244	3.09878	4.10724	3.5606	3.32752	4.14161	3.29489	5.35799	6.23401	9.95643	0.67352	0.640209	2.96363	-0.49295	-1.36794	0.6268	6.21116	3.32941	4.69039
612	3.43388	3.76582	3.35543	3.03646	3.33242	4.07523	2.21615	5.79103	3.98257	5.41809	2.29293	3.93875	4.45487	4.25159	3.05484	612	2.00662	1.75835	2.29721	3.57595	6.3828	5.47313	7.02582	2.47543	5.64257	7.14463	6.27425	5.8172	3.26777	3.622	3.57174	4.49404	4.77986	3.7319	4.38892	6.14148	8.28976	2.59756	-0.145097	2.48694	-0.112246	-1.34875	0.393364	5.62417	2.44496	4.82946
613	1.6175	2.1947	2.18001	2.21286	2.8578	2.86171	4.89528	6.0732	3.68845	5.86521	4.63312	4.82359	4.56241	5.86226	4.05421	613	2.38909	0.123825	2.35707	3.13103	7.18278	4.87184	5.26035	2.77109	6.29808	6.92316	5.98822	4.86226	2.31611	5.14416	3.43862	4.41089	5.18755	2.37814	4.05644	5.92982	8.67283	3.18318	1.05695	2.33522	1.01256	-3.17037	-0.0826366	5.62653	2.80663	5.18908
614	2.59084	1.09472	3.01876	3.96087	5.0345	1.47245	3.52548	5.9585	2.44677	5.01012	3.74784	3.29369	4.1349	6.4763	2.89289	614	2.26885	2.48508	2.02673	3.08573	6.59786	5.7696	6.27618	1.9949	6.54736	6.78846	5.73966	4.88092	3.18062	3.74968	3.91163	4.69941	5.80804	2.17868	4.59537	6.68278	9.02793	2.79217	1.0175	2.88851	-0.559072	-1.76599	0.852721	6.50758	3.38297	5.45044
615	2.04578	2.89333	2.15907	3.44893	3.79719	2.35215	5.83793	5.62667	4.00858	5.19151	4.89555	3.84785	3.86124	6.7209	3.73525	615	2.06916	1.86022	2.43689	2.98859	7.82278	5.52458	6.64034	1.99574	5.11741	7.5635	6.25565	5.82426	2.32643	4.29074	2.75155	3.01129	4.53367	3.4777	5.15498	7.41448	8.7563	3.82367	1.16663	2.62626	-0.913206	-0.869225	0.114111	5.63711	4.38154	4.65935
616	1.85813	2.31228	2.9979	3.63589	4.74399	1.52216	3.39872	5.91164	4.02096	4.56671	2.90861	4.40226	3.31826	6.54219	3.73437	616	3.61022	2.18627	2.79845	2.69223	6.85754	6.04611	5.47213	1.30077	4.91069	6.00989	5.50805	4.78605	3.12154	4.79711	3.99703	4.22374	4.33952	3.11122	5.50799	6.46137	8.38687	2.1449	1.16411	2.2721	-0.138631	-1.12974	-0.116521	6.71288	2.17498	4.98091
617	2.24957	1.20171	3.184	3.51833	3.75456	2.73684	5.00498	6.18733	3.53077	5.72913	3.48046	4.21149	3.19144	5.6958	4.96753	617	3.7676	2.23025	2.22957	2.91693	6.12362	5.85541	5.75198	2.5672	5.16442	6.88037	4.8484	5.5657	2.29814	4.38029	3.70526	4.74399	3.48988	2.10239	4.51588	6.65041	9.01611	2.70665	1.68119	1.65586	-0.0082894	-0.337825	0.66415	4.89888	2.50547	4.70239
618	2.84287	3.94581	3.53395	3.35722	4.65914	2.82596	2.84376	6.42489	3.64499	2.73335	4.11371	5.07203	3.40978	6.17106	3.07093	618	3.35411	1.95689	2.64825	3.59219	7.41835	5.55916	6.32754	2.29304	4.93204	8.16256	5.66432	4.81858	2.53756	4.57408	4.78702	4.45902	4.09679	3.43296	4.92677	5.79194	8.90019	1.83249	1.64617	1.65821	-0.633891	-1.24663	-0.35046	5.67337	3.39429	5.1369
619	3.54521	1.54455	2.81469	3.72004	3.79018	2.55011	5.05763	5.91684	3.44114	5.73698	4.52321	4.95061	5.13472	6.85699	4.67002	619	3.21289	2.45743	2.25036	3.06803	8.09825	4.92909	4.1984	2.30651	5.06088	7.4135	6.78934	4.90969	3.15457	3.98578	4.23639	3.12813	5.38154	3.22864	6.04444	6.56278	8.92598	2.902	1.10524	1.49348	-0.217717	-1.17708	-0.134649	6.2191	2.11795	4.11959
620	2.56693	1.33708	3.4678	3.21035	4.5376	2.09526	3.29666	5.20662	3.23417	5.97927	4.34624	4.83775	2.27518	6.19915	3.31237	620	3.16858	1.58018	2.21095	3.82862	6.6632	6.25842	5.81938	1.83048	4.4602	7.56078	6.08162	6.50696	2.28052	5.37744	4.1033	5.07337	4.92206	1.76497	5.39905	6.23438	8.62189	2.00631	0.225497	2.06608	0.458987	-2.22406	1.43072	5.30681	3.16165	5.7975
621	2.01797	1.50743	1.92977	3.10869	4.64107	2.39252	5.04019	6.57351	3.96947	4.23314	5.11173	4.82219	4.48659	6.88053	4.29549	621	4.54504	0.919843	0.645833	2.03094	6.04288	5.73121	7.14477	2.28388	4.51525	7.11059	5.18837	5.06768	1.00325	4.12201	4.14584	4.60003	6.02384	3.83561	4.54958	6.25631	8.23216	2.4197	0.92742	2.76398	-0.350456	-0.930274	0.819238	6.13293	2.47458	6.44468
622	1.5263	3.01874	2.43406	3.97775	4.1786	2.21503	4.05086	5.60423	3.94264	4.13418	4.82626	4.25136	5.09462	7.28579	5.06531	622	1.82741	3.26864	2.43852	3.37143	7.4868	5.23499	5.44708	1.03678	4.30762	6.53604	5.2021	5.34951	3.25373	4.0303	4.10997	4.34693	5.04222	2.46147	4.68519	5.70545	9.07317	3.12726	1.66445	2.32684	-1.33767	-1.4274	0.854591	5.99225	2.89727	4.20407
623	2.71805	2.07819	3.15522	2.88487	4.57048	2.04663	3.95001	4.92637	3.73024	4.82784	5.35124	4.81451	4.9362	4.28552	4.24374	623	1.44411	1.1596	1.63565	3.10419	5.1805	5.33856	5.14272	2.57088	5.61244	6.77547	6.17639	5.08867	3.69882	3.26296	3.15304	3.52748	4.86672	3.89421	5.34001	5.63201	8.81485	2.25722	1.08479	1.98322	-0.975384	-0.440861	0.895499	5.96424	3.43504	4.73148
624	2.24082	1.96697	2.6465	3.45244	4.77441	1.86448	5.14733	6.62799	5.60596	5.58343	4.00344	4.38924	4.53362	6.69553	3.25855	624	3.20572	2.45878	1.62652	2.89784	6.60278	5.48384	5.81575	1.33073	4.69797	7.41952	7.62522	5.0441	2.45168	3.75127	3.74408	4.22254	5.13072	3.06749	4.5387	5.84983	8.27993	2.7043	0.781828	2.30631	-0.52693	-1.084	-0.629053	5.36682	2.46758	5.92491
625	2.71128	2.20915	2.59746	2.1311	4.49606	3.14982	5.8936	5.72498	4.23045	6.04004	4.55879	2.64731	3.69286	5.93219	4.31262	625	1.95934	1.24944	1.17072	3.22619	6.0858	5.33146	5.57317	1.6032	4.89494	5.9079	5.86312	5.6304	3.75324	3.11034	3.26096	3.7896	4.65416	3.17876	4.38327	6.41279	9.07365	2.25208	0.824005	2.70798	-0.348728	-2.75692	0.089913	6.37876	2.24476	4.66925
626	2.32296	2.80282	2.64205	4.00308	3.60209	2.81937	4.58875	6.15067	4.6339	5.02506	2.94645	2.65933	3.78434	6.0609	3.86972	626	3.99542	2.30997	1.24831	2.07189	5.87423	5.64611	4.62479	1.6856	4.31849	7.17845	6.1017	4.92594	2.58559	2.64441	4.02688	4.15337	4.00204	3.81823	4.96539	6.01005	8.80398	2.60957	0.969172	2.18341	-1.25622	-0.223146	-0.124806	5.47464	2.83285	4.0236
627	4.22969	2.46159	2.97484	2.50144	4.26968	1.22577	4.90467	5.18437	3.27663	6.66001	5.5542	2.45678	3.92038	5.82612	2.7176	627	2.96267	0.429213	1.99862	4.15273	6.46036	5.12981	5.64211	2.26601	5.56483	5.39534	5.57483	6.21466	2.8549	4.05975	3.82626	3.44667	4.47567	4.12846	4.9675	5.73669	9.11214	3.68811	1.33738	1.9463	-2.38327	-1.19803	-0.851851	4.89951	2.54069	5.60345
628	3.56564	3.11149	3.03171	3.77777	5.22136	3.15143	5.25299	6.48253	4.28601	6.49376	5.20007	4.64872	4.71938	6.78729	4.19817	628	3.66666	2.02277	0.52252	3.32959	6.74468	5.72992	5.11377	1.38631	4.67337	6.65246	5.08586	4.93995	3.39375	3.65382	3.93357	3.99187	4.55195	2.82528	4.87335	6.65643	8.62974	2.24271	1.58532	2.40078	-0.270154	-3.06561	-0.663491	5.54925	2.81353	5.41593
629	3.39116	3.02334	3.31155	3.42125	4.77076	2.33966	5.75189	6.88561	3.95161	6.15414	4.67467	3.62651	4.37845	6.19412	2.85497	629	3.31931	1.92946	1.3491	3.46922	7.21912	5.51889	5.37499	2.05438	3.96169	6.37731	6.88352	4.92845	1.74232	4.27659	4.76213	3.17377	4.91563	2.92369	4.49927	4.51045	8.97239	2.4627	-0.675192	2.17151	0.482476	-1.25509	1.5595	5.74916	2.88582	4.5393
630	2.39277	2.90332	2.97535	2.8294	4.42957	1.63861	6.00519	5.69543	3.38762	4.70021	4.84016	5.43344	4.61383	6.77247	5.07269	630	2.83423	2.2019	1.02638	2.55248	6.30447	4.6233	5.51629	2.33317	4.85073	6.85693	6.38287	4.93553	2.33805	4.27475	3.20682	4.07484	4.41187	4.17505	5.20766	5.78125	8.68105	2.07154	0.617859	1.19641	-0.156523	-1.23458	-1.1463	5.0256	2.53679	4.96193
631	1.39079	2.8966	2.24966	3.18915	4.46369	1.83595	4.11735	6.39524	3.82003	5.91393	2.83128	2.97084	3.25077	6.6159	4.48481	631	2.34268	2.3353	0.996849	2.82363	5.58102	6.33331	5.33123	1.56351	4.27525	6.76116	5.14263	5.64087	1.99672	4.10451	4.30642	4.88062	5.1395	2.89642	5.61689	5.52674	8.30783	2.3274	0.190118	2.01233	-1.2504	-2.16774	0.0928594	6.07793	3.14777	5.87691
632	2.28771	0.922064	3.14088	3.2925	2.7393	2.37617	3.81415	4.91784	2.81728	5.87089	3.6304	4.53665	4.913	7.02384	3.96574	632	3.64662	2.77173	2.45814	3.36354	6.90331	5.10577	4.80102	0.631197	3.31884	6.49435	4.77522	5.42161	3.16536	2.97963	4.07638	3.62653	4.13764	3.46465	4.99079	5.98514	8.87776	1.75485	0.792117	1.58403	-0.681946	-1.27144	1.00518	5.7696	2.80503	5.03225
633	2.21718	3.01976	2.7798	2.52619	2.33001	2.81036	5.15523	5.34258	3.8858	6.57211	4.26388	3.32061	4.73779	6.3931	4.275	633	3.11272	2.87214	1.79611	3.10327	6.75592	5.27793	5.95118	1.36818	5.84111	6.62487	5.96251	5.98815	3.79056	3.40037	4.94602	4.534	4.51298	3.02494	4.28536	5.91383	9.01191	2.65839	0.277425	2.11968	-0.169867	-1.30244	0.265779	5.81015	3.78755	5.75413
634	3.43965	2.02375	2.63445	3.87106	4.56192	3.18071	4.08364	5.40735	3.86771	5.25892	4.11896	4.01045	5.04166	5.33023	4.92189	634	2.33923	1.94757	1.5385	3.22515	6.62544	4.59768	5.87135	1.08558	3.2756	5.49325	6.18099	6.3329	1.82439	2.32162	3.70591	4.64673	4.94296	3.11214	4.60111	6.90948	8.89742	1.48469	1.20211	1.67041	0.562697	-1.19616	0.865985	6.40508	3.44593	5.08841
635	1.42985	2.49216	1.96844	2.91209	3.57752	2.0765	5.71165	4.50863	4.9872	5.53947	3.82172	4.54862	4.35968	5.7343	4.38795	635	2.89601	1.2439	2.78209	3.09866	7.34603	5.03311	4.76678	1.55678	3.89008	7.58798	5.0311	4.93734	1.57385	2.8992	4.34615	3.89759	3.59098	3.79699	5.2876	7.38107	9.21527	2.9346	0.119441	2.69328	0.529767	-1.39995	-0.513592	6.21525	3.09878	5.35345
636	2.50607	2.1533	2.10344	2.9948	3.91207	2.28871	5.16144	6.02974	4.17372	4.37553	3.93534	5.39182	5.248	6.09988	3.95271	636	2.92618	2.32132	1.92286	2.34842	6.57338	6.07521	5.93435	1.60831	5.0344	6.61311	5.47073	5.17894	2.95058	2.50301	3.79875	3.36057	4.4106	3.2539	4.46257	5.51794	8.97128	1.34706	0.831077	3.2091	0.0426043	-1.7591	-0.53421	5.93826	3.30025	4.87239
637	2.39233	2.68427	1.73368	2.7388	4.64079	2.50337	3.84712	6.12188	2.78098	4.66675	4.54978	3.69658	4.70616	6.8172	3.28494	637	3.67395	2.09089	2.092	3.02744	6.47566	5.16722	5.82426	2.55563	4.24376	6.57367	6.04422	6.47343	2.02926	2.99361	5.27593	3.58135	4.98767	1.75821	5.52765	5.97963	8.46659	2.29942	1.00375	0.697388	0.47151	-1.11489	0.159028	6.63617	3.79184	4.80543
638	1.1469	2.82923	3.34673	3.45047	3.76469	2.57801	2.908	4.99097	3.30431	5.51055	3.75172	4.82665	4.74209	5.89013	3.75275	638	3.48221	2.4949	0.76412	3.20039	7.20832	4.87566	5.31886	0.427924	4.88456	6.16191	6.36108	6.15979	2.12574	-0.510934	5.03148	3.07579	5.49296	3.62029	4.63211	5.6399	8.2694	1.06259	0.923936	1.31928	-0.341465	-1.77253	-1.15238	4.58727	2.97838	5.46579
639	2.21544	2.03088	2.77524	3.97829	4.19663	1.98544	5.93839	6.06161	3.8418	5.06571	5.3651	3.4873	4.50686	6.36344	4.22043	639	3.86577	2.66035	2.45255	3.24657	6.13885	5.41133	5.93541	1.58773	5.11966	5.5596	5.16298	5.49496	2.81679	2.47812	4.74055	3.68645	3.48058	2.49239	5.10755	5.83556	8.35797	3.72861	0.479212	1.48292	-0.664453	-2.27245	-0.0525063	6.95931	2.81697	6.03122
640	3.23616	3.48151	3.40578	3.72547	4.48295	2.5245	4.18587	5.20112	5.57865	5.18353	3.70222	3.15873	4.89034	5.21214	4.84598	640	3.3436	3.36881	0.203557	2.61482	6.89336	5.82307	6.37437	1.8469	3.31406	7.1487	4.97054	6.38342	2.08129	1.35884	4.0865	4.3274	4.37503	2.19473	4.04745	6.87279	8.24095	2.75266	1.67609	2.08427	-1.13867	-1.01344	-0.0264828	6.74216	2.26369	5.15634
641	2.8293	2.98002	3.45055	2.8416	3.95187	1.83447	4.08245	6.2993	4.09431	5.37258	4.92642	3.94306	4.34314	6.25685	4.3817	641	2.37008	2.45755	0.760543	2.56613	5.6327	5.69771	5.89298	2.09747	4.21871	5.90128	5.37687	5.39223	1.99379	0.875433	3.73122	3.89032	5.56913	3.6989	4.7098	6.71369	8.68387	1.69587	0.431763	0.76922	-0.314321	-0.243291	0.540588	6.27878	3.47704	4.73578
642	1.9822	3.31712	2.4796	4.06448	4.0752	1.94494	2.71746	5.64996	4.41797	6.21971	5.20328	3.54145	4.96452	7.11444	4.41118	642	3.9899	2.88744	1.80879	2.55478	6.98774	5.65273	6.82708	1.83625	4.17806	7.02541	6.33445	5.12716	1.2876	1.77952	3.68715	4.13321	4.31759	2.53873	4.64614	5.97739	8.94985	0.829346	-0.185902	2.05359	0.382915	-0.66326	-0.582641	6.10937	3.72482	6.20148
643	1.99101	2.39221	2.46969	3.58318	3.707	2.25071	4.20433	5.09445	2.67777	5.54421	4.28609	3.29247	3.19755	7.15789	3.43534	643	2.25631	2.37212	-0.118604	2.89441	7.24691	4.80982	6.26233	2.5642	4.73205	7.02044	4.86884	5.22348	2.34342	1.75108	3.80512	3.88015	4.16541	3.4586	5.45348	6.11351	9.03089	2.49512	0.499499	1.38993	-0.191955	-0.722545	-0.892521	5.7216	3.19797	5.05665
644	1.7095	3.62322	3.06166	3.71449	3.17162	2.8209	4.81377	5.43879	3.2403	5.24209	3.02379	4.53197	5.26507	6.68401	3.71461	644	3.73733	2.63742	2.03291	2.76477	5.71476	5.64612	5.97091	2.00595	3.71695	5.65299	5.54833	6.35425	3.22667	2.10984	4.46457	3.17738	4.57346	4.49885	4.66964	6.46846	9.34992	1.12312	0.274252	1.51255	-0.697835	-0.558362	0.166197	6.55507	3.37082	4.7764
645	2.92689	2.67865	3.12086	3.11112	4.35495	3.01735	4.97793	6.80523	5.01485	6.97194	5.7952	3.95798	2.66651	6.00071	3.81691	645	3.10888	3.20393	1.73121	3.40826	6.52089	5.39382	4.92749	1.42967	3.98853	6.36769	4.4543	4.6743	-0.623266	1.57338	3.81489	3.9002	4.57867	1.99296	4.63624	6.33673	8.72842	0.669465	0.957603	0.880236	-0.90103	-1.19362	0.861194	5.60742	2.94143	5.53015
646	2.99606	3.17722	3.11636	2.9523	5.02407	2.78548	5.32116	6.43948	4.04945	4.95998	5.04228	3.06747	5.00567	5.52962	4.26804	646	3.59113	2.66635	1.51194	2.75034	5.77972	5.2667	5.25127	1.65887	3.6707	5.76888	6.42412	5.59119	1.82618	1.00619	3.21572	2.57958	4.9085	2.9542	5.10066	6.27513	9.14392	1.38861	-0.669619	1.02813	-0.732612	-2.02844	0.108974	5.10029	2.67731	4.24375
647	2.99722	0.354347	2.81339	2.42194	3.08207	3.1028	3.74756	5.21969	3.54002	5.30934	5.53815	3.93675	5.63536	6.23175	4.15757	647	3.47012	2.29274	0.195339	2.5902	6.1254	5.18631	4.95352	1.15258	4.65912	6.17973	4.9154	5.57401	2.74626	-0.0167619	3.51327	3.28681	4.40889	2.22014	4.57821	6.61984	8.0679	2.75548	0.598118	1.29231	-0.122524	-1.61309	-0.230136	5.90984	1.95769	4.78729
648	2.44665	2.27838	2.79767	2.92923	4.42481	1.84296	5.07519	6.48087	4.81281	5.60151	3.98411	3.41872	3.12886	6.48845	3.69769	648	3.20834	1.70124	0.550136	3.16325	6.35022	5.16056	5.41195	1.04195	4.77442	5.62466	5.26715	6.50098	2.94623	0.570622	2.98133	4.35497	6.17248	2.39861	4.85631	6.21068	8.18074	1.40796	1.14001	0.666695	-0.526797	-1.26473	0.433962	6.10396	3.4694	5.5996
649	1.39895	3.24191	1.95749	3.13126	4.14469	1.7381	5.83828	3.80082	4.39576	4.7011	1.60666	4.02408	4.28449	6.15908	3.52455	649	2.72797	3.03255	1.97586	2.88457	6.50279	4.3821	5.42448	0.990911	4.03699	5.70828	5.32003	4.75549	1.35485	1.3607	4.00213	3.96781	4.20079	2.62229	4.60978	6.11969	8.93614	2.07774	0.0915861	1.42108	-0.13123	-0.527735	-0.500287	6.48775	4.07414	5.46157
650	2.77744	3.44541	2.88868	2.28708	3.58631	2.62925	4.02944	5.53553	2.53797	6.02675	4.4139	4.27271	4.27498	6.82229	4.74934	650	4.01473	2.43148	2.0623	1.90972	6.83236	4.5521	5.79841	2.23968	2.61964	5.91494	5.50465	6.01423	1.09867	1.49206	3.77088	3.41593	6.29031	3.54266	5.54213	6.35918	9.32576	1.36949	0.854571	1.9366	-0.542192	-1.93186	0.363752	5.78403	3.83254	5.09092
651	2.45675	2.66922	2.36068	2.91389	3.73622	2.40109	4.76566	4.84005	3.69047	4.81508	3.66279	3.76213	4.27223	6.94576	4.24369	651	2.88228	2.90903	1.77223	2.68501	5.50477	5.5251	5.90076	0.987858	3.39372	6.27103	6.40323	5.58252	2.96991	0.685345	4.11836	3.66758	5.50695	1.92508	4.09482	6.1196	9.22071	1.80024	1.1226	1.79228	-0.439683	-0.573462	0.92136	6.08243	3.273	5.01021
652	2.26403	1.55508	1.5698	3.94335	3.13184	2.56172	5.33882	3.58463	3.60293	6.81794	4.90518	4.41962	4.23032	6.06855	4.7693	652	2.49172	2.81541	1.58381	2.39771	6.02715	5.24656	6.73192	1.04994	2.70002	7.0394	4.49389	5.74261	2.94016	-0.370625	3.43109	2.84769	4.36298	2.39281	4.9464	5.8017	8.46171	0.65763	-0.506648	1.65075	-0.789288	-1.76233	-0.288079	6.19213	2.80592	5.2467
653	3.27773	0.493246	3.22417	3.75322	4.25588	2.54418	3.89796	5.21876	2.99828	5.68656	5.88596	2.64031	3.56363	7.11035	4.45868	653	3.4912	2.44529	1.34022	2.42248	7.09733	5.75971	5.86665	0.790686	4.79874	6.38739	4.40383	5.78283	3.28968	1.33018	3.4521	3.89844	3.96578	2.43337	5.14041	5.04343	8.91293	2.17752	-0.0811828	1.61801	-0.457499	-1.52125	1.17021	6.67756	3.99814	4.54439
654	1.38978	3.17841	1.86168	3.13988	3.6691	2.93837	4.76687	5.37384	3.97991	5.39306	2.71749	3.63205	4.03018	6.16695	4.43398	654	4.29121	3.23874	1.3352	2.92069	6.58055	4.80602	5.50329	1.05624	4.57337	5.25502	5.2147	5.60362	2.47715	-2.64891	4.10565	4.13308	3.94244	3.18585	5.60185	6.77284	9.13391	1.30482	0.273886	0.469437	0.2684	-2.59793	-0.245653	5.89114	3.38803	4.44972
655	2.77987	1.454	3.6791	2.55044	2.60045	2.70529	4.80633	4.77949	3.81244	4.64043	2.5293	3.13414	3.36761	5.49362	3.75171	655	3.31707	2.52579	1.92523	2.45745	6.95121	4.95798	6.03055	1.34569	3.91084	7.30089	4.77397	6.02759	1.35573	1.18775	4.98048	3.75185	4.26607	2.51277	5.08923	5.91095	7.94507	2.20628	-0.413268	1.45749	-0.745012	-1.12211	0.375039	5.23487	3.51083	4.67963
656	2.79871	3.43719	2.53041	2.33644	3.90515	2.77482	4.86182	5.86104	4.88271	6.59763	4.98247	3.24964	4.4763	6.73544	4.15962	656	2.93899	1.46488	1.1131	2.43568	6.1329	4.54082	5.51516	0.968961	4.1265	6.25653	5.53416	6.37569	1.37854	0.818263	4.2992	3.43212	4.34252	3.10179	5.11401	7.1371	8.62634	1.00798	0.836618	1.24611	-0.301418	-0.865176	-0.870761	6.37982	2.86441	4.14592
657	1.89567	2.58701	3.98688	4.07454	4.62241	2.4541	6.41976	5.4502	2.38821	5.22792	4.85114	3.78582	3.88381	4.73022	3.80668	657	3.44396	2.23684	0.978471	1.48814	5.50967	5.15172	6.35194	0.93436	4.51644	6.10719	4.74746	6.22123	2.54043	1.75565	3.21261	2.34313	4.69934	3.0513	5.36185	6.15685	8.32527	-0.0199239	0.708395	2.21419	0.0644173	-1.74234	-0.821063	4.68442	2.92036	4.65595
658	2.72926	1.57747	3.70667	2.89297	4.30246	2.40276	5.34801	6.81847	3.54438	5.40247	4.92792	3.49814	4.56991	5.64393	4.09292	658	3.92592	3.33232	0.953198	3.0438	6.23374	4.57281	5.99992	0.792026	3.24614	6.35469	6.10604	5.95772	3.28301	1.29919	4.51482	3.22223	4.83724	2.94598	4.73129	6.38138	9.00112	1.44581	-0.0835839	1.90746	-0.810284	-1.33665	-0.0550121	5.76079	4.64904	4.53116
659	3.70835	0.887155	2.39043	3.26059	3.66388	3.3567	5.26619	5.71599	4.7687	5.92952	3.00675	4.03445	4.04802	7.35637	3.98174	659	4.21415	2.71899	1.68781	2.26995	4.26513	3.93325	5.80598	2.27961	4.18321	6.71893	5.58751	7.07976	0.96417	0.344633	3.54297	2.16101	4.39571	3.8426	4.3197	6.26276	8.18091	2.40718	0.341724	1.18726	-0.400059	-2.34751	0.344403	5.99868	3.51076	4.47678
660	3.27086	3.04673	3.24151	3.35223	4.64609	3.36285	4.47673	5.62732	3.61636	6.33507	4.51891	2.78977	3.58472	7.45941	3.67801	660	1.75993	2.66385	-0.0448319	2.11263	6.63247	4.49501	5.63964	1.36006	3.73294	6.67881	5.58669	6.19838	0.849478	0.290613	4.8374	3.59082	5.27298	1.65521	4.81715	6.6592	9.15704	2.4889	-0.240156	1.82074	0.543652	-2.06444	-0.200101	6.03764	3.13477	4.81767
661	3.08948	2.94225	3.86615	2.87977	4.74865	2.2956	2.81163	6.66442	2.74022	4.36946	2.70096	4.29747	3.12641	4.64362	3.9673	661	2.41122	1.61205	1.25086	2.77089	5.22465	4.95676	5.61047	0.973321	4.10522	5.53017	5.70075	5.62277	1.22068	0.914881	4.65407	3.89502	4.86006	1.88289	3.8122	5.9641	9.30301	0.59088	-0.0239319	1.87519	-0.537388	-1.50902	-0.51963	5.68286	2.46382	5.59392
662	2.98461	2.45702	2.44511	2.49856	4.48776	3.42131	5.97636	5.42597	3.25279	5.02498	5.70908	3.5232	5.01389	6.29124	4.55313	662	4.37445	2.70675	1.10473	3.02053	5.39025	4.65837	5.55786	0.979875	4.28996	6.95048	5.47723	5.7953	2.12256	0.70772	3.67547	1.79488	5.02355	2.62802	4.86284	5.65939	8.18246	-0.257318	0.801306	1.87065	-0.856816	-2.86933	0.558527	6.68465	2.71558	5.25103
663	2.26327	2.40836	2.71035	3.10277	4.65684	3.02707	6.0832	5.60198	3.46514	5.26868	4.31361	4.10547	4.12018	5.15379	4.07672	663	4.14628	2.544	1.35272	1.87811	5.77788	4.70722	5.40824	1.25857	3.69698	5.46363	5.01657	5.5805	3.28905	0.311497	4.53789	2.53504	5.83463	3.37873	4.82792	6.33905	8.3152	2.00601	-0.270568	1.42864	-0.0760306	-1.46556	0.368272	5.66648	2.05354	5.28401
664	2.22716	2.60186	3.52886	3.08078	3.75575	2.69164	5.13683	5.21124	2.6019	4.28503	4.21347	3.3501	4.79497	4.65773	4.32237	664	2.7142	2.11433	1.56198	2.26659	6.5653	5.27978	5.39891	1.86988	3.12555	6.95576	5.02164	5.82145	2.7193	-0.905382	4.50725	3.19249	5.25938	1.72223	4.65883	6.03815	8.652	2.61438	-0.47815	1.66081	-1.85434	-0.896827	-0.0891661	5.9877	3.39395	5.17672
665	2.71554	2.87151	3.58093	2.9723	3.8956	2.86543	5.83513	5.71299	4.91103	5.05819	5.24147	3.91646	3.96424	5.74848	4.91296	665	3.48774	2.05134	1.68644	1.68647	6.73636	4.30742	5.66793	0.540968	3.54892	5.65439	4.61201	5.98112	2.60813	0.499062	3.60508	2.72036	5.56874	3.04405	5.71319	6.27329	8.51339	0.565181	-0.300587	1.38703	-1.18121	-2.60801	-0.530323	5.18549	4.79173	5.40137
666	2.44154	3.16293	2.3947	1.71556	4.66441	2.70453	4.46692	5.17894	3.83232	4.78802	5.36298	3.98279	5.11905	5.87575	4.79513	666	3.24659	1.86309	1.47462	1.90768	6.70085	5.20686	5.00858	0.203441	3.49114	5.66063	4.27966	4.50844	2.24869	1.23903	4.12241	3.84732	5.48417	3.26522	3.67414	5.49337	9.32409	2.97675	0.250504	1.48883	-1.38358	-1.72181	-0.393479	5.6815	3.01994	4.51331
667	2.98723	2.3121	1.63941	2.83013	3.75036	2.89237	4.92371	6.83172	5.35244	5.11079	3.56357	3.92521	4.87354	5.42745	4.48706	667	3.05333	1.28502	1.79876	1.66574	6.56831	4.38787	5.46573	0.878414	3.51357	5.06556	5.39624	4.80078	2.41867	2.09763	5.00174	2.86528	6.70915	2.67205	5.58177	5.56419	7.97613	3.1383	0.599604	2.28173	0.11626	-1.47449	0.394972	6.11523	3.22048	4.41627
668	3.27761	3.79022	2.32451	2.91699	4.59159	2.59568	6.05797	5.15257	1.94852	5.83338	4.90967	4.48236	3.21074	5.06584	5.06482	668	3.02964	2.67478	1.83559	1.76147	5.76798	4.2226	4.83285	0.733411	4.05152	6.88856	6.43655	5.34902	2.24506	2.35141	3.7653	2.0819	5.1216	2.20431	5.59015	6.20375	8.65444	2.24595	0.0360877	1.96234	-0.755626	-1.06696	0.0858322	5.64842	3.824	5.04595
669	3.82185	1.12906	4.08842	2.82629	3.95836	2.93044	4.70691	5.68776	3.54374	5.63629	5.35175	3.93528	3.288	5.76418	4.31128	669	3.60128	1.68436	1.63183	2.2125	6.13961	3.98911	4.65904	1.04396	5.27433	5.39756	5.24157	5.44281	2.5306	2.95212	3.53054	3.34571	5.95316	2.3121	4.94854	6.38451	8.36585	2.67219	1.04518	1.69883	-1.08665	-0.70639	-0.74565	5.93558	3.5795	4.8361
670	2.93407	2.0378	3.27818	3.08262	3.13395	3.21216	4.28467	6.84221	2.59218	7.17976	4.77758	5.27066	2.89163	6.45528	4.28056	670	3.48903	1.75954	1.09795	1.87985	4.80852	4.38914	5.30094	1.62466	4.04454	7.46943	5.85206	5.44625	2.17947	1.72802	3.98885	2.89565	4.76288	1.88209	5.20946	6.64981	9.31673	1.81275	0.242632	1.37944	-0.951634	-0.864035	-0.743884	5.55994	3.53569	5.48025
671	2.85653	2.3758	3.09084	3.8287	4.74498	2.3284	4.23764	4.8189	3.18818	5.86893	3.75171	3.26603	0.741388	5.95503	3.81946	671	3.89269	1.78866	-0.186615	2.05665	6.48827	5.08969	5.26084	1.08527	3.51521	5.80109	4.66641	6.95127	2.96174	2.5972	3.75913	1.82423	4.55829	3.12828	4.59124	5.95047	9.1532	2.03131	0.983295	1.82869	-1.05524	-0.767788	-0.133909	5.35774	3.7385	4.57304
672	2.72883	1.71806	3.07659	2.58019	3.5075	3.19956	4.97629	6.88264	3.591	4.8938	3.93229	4.66879	4.70814	6.3154	5.65614	672	2.66175	1.6981	1.51128	1.67698	6.32555	4.86438	6.23727	0.590386	2.91233	6.46243	3.30471	5.2387	-0.364126	2.11474	3.22992	2.85467	5.14682	2.75021	4.79489	4.90974	9.29526	0.672582	0.589487	2.17729	-0.797344	-2.64303	-1.64247	5.7467	2.67173	5.70317
673	3.6634	2.73937	2.90953	4.03766	3.3524	2.88906	4.83669	6.61248	2.99198	3.78609	4.37344	2.59273	5.17669	5.77706	3.99427	673	3.56807	2.39601	1.43493	1.95811	5.57079	4.7565	3.30217	2.1475	4.01428	5.84159	5.03449	5.75614	2.10471	0.911473	3.54377	3.48992	5.60224	3.68178	4.60079	5.46169	8.83855	1.44112	0.148104	1.23561	-0.167431	-2.73041	-1.2849	5.44912	3.64867	5.1982
674	2.81952	3.04925	2.39873	2.85253	3.10721	3.37525	2.35583	5.63399	1.95203	4.8318	3.16942	3.96165	4.22451	5.2537	4.21678	674	4.34818	0.655917	1.47687	1.33567	5.64702	4.8633	4.97565	-0.588518	4.17654	6.3577	5.87157	6.11729	3.25584	2.18311	4.50064	1.59483	4.7456	2.32303	4.61395	7.11091	8.88775	2.4833	1.10397	1.63009	-0.582779	-1.89492	-1.09777	6.60991	2.89872	4.57375
675	3.19488	2.7138	2.56846	3.20938	2.72258	2.59432	4.63543	5.19147	3.76163	4.63388	5.44884	4.75609	3.86663	5.59694	4.57307	675	3.65915	2.44997	0.22066	2.21835	6.81426	4.99995	5.61163	1.07506	4.462	6.91476	5.8812	4.81073	1.77933	2.88252	3.9421	3.84212	6.27111	2.40146	4.89202	6.95515	9.06533	1.7486	0.0165368	1.20352	-1.27574	-2.12946	-0.886757	5.19146	2.76521	5.04692
676	3.58773	2.75131	0.881876	3.29392	3.74823	2.54201	4.53063	5.425	3.04336	5.70974	5.13747	4.98883	4.40899	4.97496	3.14834	676	3.32841	0.386962	0.934838	2.99125	6.84185	5.21435	5.47807	0.976174	4.76852	6.04234	5.78051	5.62947	0.861837	2.93635	4.05502	2.55924	5.09347	3.09068	5.16402	7.0846	8.77852	2.38233	1.71254	2.38044	-0.933633	-1.93157	-0.386328	5.35035	2.5788	5.75083
677	2.29139	2.60405	0.775718	3.31024	3.72699	1.39967	5.09687	4.84173	2.65194	4.97201	2.55557	5.426	3.18216	5.66372	4.62243	677	4.60109	1.91573	2.09179	1.63382	5.9454	4.76231	5.56364	-0.0315106	4.22459	6.53898	5.54389	6.53071	2.16452	1.6722	3.15251	3.41974	5.28768	4.76489	5.07457	5.39962	9.04879	1.30578	1.3819	2.25198	-1.12112	-1.03093	-0.240844	5.58473	3.87267	5.52281
678	1.58956	3.28436	2.84133	2.47206	3.79007	2.73622	4.85241	4.89609	2.98514	5.91978	3.14975	4.65633	3.91053	5.53958	4.36992	678	2.94945	2.0898	1.06726	2.40624	6.05457	4.92004	7.12383	1.06246	4.58885	6.14318	5.39162	5.69867	2.33297	2.36791	3.71176	3.29015	4.27221	2.04025	5.20796	6.64085	9.15594	1.7796	-0.0681985	1.08529	-0.293852	-1.7886	-0.987657	5.70392	3.57282	5.47547
679	3.14474	2.74329	2.8083	3.04453	4.20981	2.30734	3.56889	5.13401	1.21623	5.19843	5.97771	3.45369	3.04004	6.20895	4.0863	679	3.65201	0.747288	0.620882	1.41335	5.54806	3.77335	4.57956	1.61512	3.33879	6.90787	5.31475	6.10484	2.19447	2.70535	4.41	3.45205	4.53173	3.44491	5.27704	5.7606	9.45981	2.31381	-0.368036	2.39961	-0.950894	-1.52875	-1.32742	5.84533	3.8503	5.68234
680	3.60139	1.65126	2.51437	2.6496	4.5138	2.95496	5.65955	5.03737	4.40853	5.66463	4.64248	4.69306	4.65875	5.89879	3.94131	680	3.48363	1.76911	0.668596	1.83765	5.59968	4.14285	6.89481	0.223765	3.77389	5.92487	4.36048	5.31312	2.44061	2.81615	3.6898	3.61776	4.56043	2.55104	5.89117	7.0208	9.86534	2.91517	1.68428	2.20266	-0.98043	-1.18516	-0.896881	6.31961	4.78198	4.9187
681	2.51753	2.47098	2.46933	2.63739	4.14106	3.06638	4.42317	4.29931	2.90588	6.14942	4.59287	2.97419	3.19695	5.35092	3.5824	681	3.50167	1.742	2.10761	1.79118	6.35825	4.84975	6.32524	0.870681	4.03353	5.89291	5.11203	4.62135	2.83026	2.69368	4.18378	3.44434	5.07269	2.44521	5.4757	6.71531	7.9231	1.58787	1.3159	2.42769	-0.160823	-1.42477	0.282463	5.34723	2.59803	5.32207
682	4.1171	2.00239	4.26625	3.85028	4.33397	3.22643	6.01578	4.86652	1.34413	5.25134	3.07633	3.40156	4.53228	4.87333	3.73306	682	3.55236	1.65024	1.84909	2.09785	5.97691	3.50957	5.65834	1.42981	3.08995	6.86817	4.48571	5.66985	1.45784	2.90155	2.4778	2.08801	4.99396	2.36456	4.31334	5.9139	9.3746	1.09666	-0.545351	1.57057	-0.768913	-1.3809	-0.535878	5.56605	4.26842	5.73269
683	2.58191	3.04625	2.50029	2.36056	3.63714	2.64091	3.92822	5.57244	4.30977	3.70025	4.96487	3.72019	4.29018	6.30026	3.98056	683	3.36915	2.23597	0.856482	2.13007	6.20907	4.67014	5.91945	0.337738	3.68426	5.7267	4.55692	4.11699	2.34926	2.91602	2.89985	3.06468	4.14214	3.24615	4.75588	6.10916	9.84572	3.08216	0.137535	2.53238	0.18816	-0.073279	-0.72342	4.70033	3.78023	6.98211
684	2.65395	2.86675	3.10611	3.7079	4.12163	2.3197	2.88369	6.19807	4.58352	6.29911	5.27582	3.52173	4.45599	5.47655	3.99019	684	4.10616	2.71423	1.87488	1.9545	5.87328	3.75703	5.35697	0.524765	3.09622	7.32281	5.783	5.86425	2.78086	3.77567	4.22614	3.04942	4.75818	4.39016	4.41792	5.82125	9.44217	2.92207	0.121347	2.46695	-1.22628	-2.02416	0.225511	6.01494	1.7147	5.38033
685	4.19877	2.65079	2.15107	1.80275	3.00336	3.18001	4.57354	6.04392	1.9557	4.70309	3.42747	4.6415	1.97307	5.07964	3.06007	685	3.12136	1.3229	0.408485	1.62085	6.27148	4.75155	5.11493	0.836856	3.42852	5.87419	4.25631	6.7864	-1.17688	3.80419	2.92048	2.83999	4.16793	2.40929	3.66035	6.55884	9.06963	3.01649	1.21701	1.44466	0.122099	-1.80815	-0.731947	5.27519	3.01709	5.77912
686	2.60449	4.23548	3.26889	2.06332	3.81558	2.17296	3.732	4.82548	2.41477	4.16334	4.60432	3.94509	3.08387	5.51661	4.10693	686	3.59837	1.64471	2.31987	1.68598	6.17732	5.34124	6.09114	0.456444	3.63003	5.71008	5.8143	5.67696	0.644959	3.81348	1.61548	2.70045	4.38213	1.65804	5.3699	6.19059	9.29898	2.06624	0.818533	2.71206	-0.771785	-1.94682	-0.369226	6.02516	3.82814	5.98189
687	2.46443	1.99065	2.13438	2.95546	3.33179	1.98213	1.63112	5.17262	3.35093	5.64821	3.85537	3.32537	3.0588	5.58297	3.92626	687	2.84522	1.84371	2.22233	1.99757	5.82698	4.84301	4.02016	0.660959	4.33179	6.37603	5.23474	4.46035	1.6748	3.46828	3.48696	3.33654	4.50359	2.87341	4.52554	6.36066	8.83271	0.429534	1.34204	2.09784	-1.00342	-1.32598	0.15856	4.66185	4.58046	6.328
688	3.9646	4.42152	3.1346	3.71887	3.77524	2.46727	3.68707	4.97098	3.83232	5.53891	5.68479	3.61117	2.67277	6.18778	4.30618	688	2.92351	1.27673	0.916319	2.21911	6.55769	5.18183	5.63518	-0.886943	3.68091	6.44523	5.91386	6.65588	3.45651	4.16369	2.32059	3.35558	4.50267	1.9424	4.87258	6.13867	9.7164	2.88593	-0.257628	1.35926	0.117637	-1.0839	-0.636732	5.27944	3.99846	5.43307
689	2.43834	1.49443	3.03597	4.2264	4.1138	2.734	3.78793	4.96176	3.94763	5.21852	5.66006	4.50199	4.02598	4.25891	4.01841	689	3.3028	0.749672	1.00066	3.01007	4.90086	4.07504	3.87881	0.043391	4.41721	6.94798	3.94724	5.72837	2.89319	4.29857	2.91518	2.77101	5.20654	2.96213	4.62951	5.11958	9.52173	1.72317	1.51583	2.57088	-0.659303	-0.96171	-0.57772	5.05952	3.5592	6.27248
690	3.2945	2.66321	2.74416	3.71214	3.53422	2.08499	4.41862	5.22929	3.16982	5.23041	5.17342	4.40277	3.07628	6.35696	4.29081	690	2.69537	2.25404	1.15492	2.49182	6.37345	5.11958	4.74747	-0.670685	4.32498	6.47482	4.85321	5.5793	2.07581	3.42091	3.69774	2.79715	3.73844	2.11375	4.55467	6.31793	9.51253	2.59198	0.376696	2.32908	-0.0598192	-0.735216	0.809302	5.56361	3.06087	4.55157
691	3.2614	1.52074	1.65532	3.09168	4.12214	3.20728	5.15029	5.32486	3.68737	5.21315	4.35042	3.54148	3.7658	6.09181	4.79233	691	5.22159	3.10193	1.09234	3.05997	6.12558	4.00732	5.76723	0.596676	4.26289	6.09182	4.42019	5.00938	3.28442	3.53653	1.72603	4.09068	4.61928	2.32167	5.86383	6.33859	10.9393	2.68452	-0.0750699	2.26012	-0.645859	-1.40543	-0.0885331	6.11312	3.19702	6.1794
692	3.33307	1.85786	3.29192	2.51627	3.45774	2.69981	3.37577	3.97537	2.38	4.37268	4.0579	3.18643	3.69725	5.42708	4.57859	692	3.82966	2.58184	1.21232	2.50837	5.5234	4.83209	4.04731	0.242914	4.0258	7.66179	4.78929	4.61306	3.08035	2.36148	2.81397	3.28611	5.14688	1.97524	4.71835	6.90832	8.78544	2.33007	-0.016494	1.89642	-1.19579	-1.67443	-0.949419	5.11514	3.6537	5.69966
693	2.57591	2.44037	3.13689	3.30896	3.23643	2.13631	4.5628	5.3911	3.0196	5.81338	3.10003	4.63663	3.18383	5.10923	4.64201	693	3.30544	3.04398	1.95272	1.47215	5.7092	4.95274	5.33156	1.2938	2.92493	5.86653	5.29488	5.33114	2.02936	3.96495	1.9547	3.74291	4.14617	2.64266	4.55989	6.65049	9.19036	2.11389	0.273493	1.90005	-0.523037	-2.2965	0.373527	5.0411	3.49747	5.34645
694	3.04531	2.98344	1.33089	2.96936	4.26953	2.15401	4.7072	4.56064	3.54609	4.21096	0.924559	3.43627	3.87351	4.86354	3.66383	694	3.88704	1.71895	1.33706	2.38765	5.65846	4.88893	6.61427	0.521257	4.15744	5.95888	5.10363	5.37232	1.9818	3.84417	2.45887	3.81326	3.52903	3.55796	4.93603	6.2812	10.162	2.01968	-0.461428	2.29979	-0.33789	-2.49617	-0.691664	6.25673	3.81928	5.18896
695	3.37221	1.95005	2.7852	2.57429	3.12491	1.75512	5.12179	4.16568	5.17713	5.286	4.93253	4.14851	3.94153	5.46421	3.55617	695	3.58706	1.92925	0.169784	2.14593	6.15847	4.26015	5.39883	1.06535	4.72293	5.54287	5.1385	6.40699	2.47045	3.5676	1.89723	3.30351	3.89398	2.92056	4.86017	6.41795	10.0043	1.91403	-0.442907	1.87648	-0.278889	-1.29924	-0.583974	6.23706	4.42803	6.08648
696	1.87434	3.1285	2.62693	3.43039	4.7187	1.74593	4.47517	4.82023	2.94914	5.52337	5.31569	4.51819	4.74408	6.07113	4.97265	696	3.80851	1.97867	1.9656	2.08994	6.28174	3.93458	4.31265	1.46975	5.14557	6.05932	5.62994	5.24501	1.19065	3.7485	2.90819	2.54382	5.00567	3.56187	4.40557	5.87954	8.83657	0.725682	0.120154	2.40603	-1.71378	-2.02454	-0.570398	6.53475	3.99021	6.10254
697	3.02337	3.08843	1.98641	3.0933	3.00609	2.52322	3.94156	3.85078	2.19982	5.62829	5.65749	4.1387	3.56292	5.36239	4.22553	697	3.22611	2.76583	1.27541	2.45005	6.59445	4.70906	5.71281	1.97938	4.36474	5.94094	5.66437	4.96573	2.10463	3.4369	2.87443	2.08383	5.33485	3.20826	4.45645	6.44732	10.6707	2.55728	-0.474526	1.62118	-1.04984	-1.89639	-1.09536	6.38608	1.22358	5.75451
698	3.569	2.62287	2.34806	2.74211	3.75719	2.16051	3.19786	5.90378	2.84842	4.98053	2.36166	4.19183	4.606	5.42714	4.22809	698	3.34763	2.55268	1.48188	0.878202	5.94437	3.31358	5.70867	1.39134	2.46384	5.9972	4.4621	4.86832	3.18213	3.62508	3.21092	1.60952	4.24753	3.8545	4.17062	6.85595	8.89681	1.81424	-0.142612	1.86588	-0.799371	-1.62872	-0.970482	6.37213	3.558	4.68617
699	3.20184	2.59713	2.83159	3.04053	4.4066	1.64038	4.06326	4.14534	2.23286	4.55115	4.97929	3.06305	4.88421	5.3575	5.10421	699	3.61037	2.09752	1.88205	1.29464	6.45614	4.45185	4.39367	1.08932	4.18248	6.24393	4.95095	5.80765	3.01444	3.59277	4.08012	3.1806	5.20378	3.10902	5.41363	7.16882	9.45892	0.845484	0.637532	1.11745	-0.399646	-1.22617	-1.63714	6.52747	3.98594	4.82519
700	3.4262	3.08219	1.90064	3.51927	3.93534	2.63664	3.25912	5.19028	3.70993	5.34386	6.48785	5.28967	3.73946	5.66163	4.9852	700	3.04303	2.63433	2.3486	1.75572	6.54978	3.80429	5.24884	0.220286	4.77865	5.73574	5.14094	5.79484	3.5329	3.71636	3.34355	4.02004	4.40499	3.22734	5.21351	6.57243	9.44073	3.23449	-1.05936	1.22706	-0.060669	-0.889236	-1.02826	5.20262	3.53883	6.36608
701	3.42122	2.04909	1.88837	2.76984	2.82968	3.41071	4.63847	4.01072	2.627	4.35047	4.6845	4.72921	2.0522	5.51362	4.28993	701	3.08354	2.63864	1.08576	1.29939	5.61943	3.70472	5.10223	1.03206	3.73558	6.02958	4.32016	5.8251	2.71703	3.39867	2.59055	3.87505	4.59037	3.52561	3.96792	6.15397	9.14751	-1.23823	0.823574	0.972217	-0.289826	-0.732321	-0.333358	5.74311	3.21218	5.89168
702	3.32514	2.18341	2.40331	3.15207	2.70287	3.24555	4.6636	4.28336	2.08367	4.74446	5.32576	3.80639	2.78081	4.80538	4.51766	702	3.86768	2.73465	1.24398	1.67716	5.33426	4.28476	6.03483	1.9207	4.55662	6.30765	4.74599	4.9122	3.11213	4.12493	2.06127	4.20583	4.34192	2.73832	5.32689	6.3007	9.22778	-0.0429805	0.734862	2.45607	-0.124413	-1.36221	0.343438	6.6355	3.68428	5.36549
703	2.25635	3.3318	2.73683	2.4108	3.66496	1.62137	4.53468	5.1481	3.3136	5.55731	6.03847	4.30985	3.20389	5.60408	4.41981	703	3.41958	2.31695	1.35895	2.35688	5.77679	3.65922	5.64651	1.42872	4.20099	4.81919	5.78063	5.55764	2.59761	3.83938	2.66839	4.03333	5.28216	2.44908	4.53584	6.99147	9.38761	2.03098	-0.712596	1.18892	-0.980952	-2.3756	-0.472463	5.84003	3.24969	5.45281
704	3.10067	3.0887	2.00262	3.289	2.67601	2.15212	4.25219	5.0508	3.55547	4.93793	5.68902	3.51948	2.94077	5.86011	4.55901	704	3.80125	2.85273	0.528939	1.91169	5.09104	3.85443	5.06732	-0.016462	3.9411	4.70674	4.83428	5.54644	3.03065	4.13312	2.33043	4.39996	6.09773	3.17414	4.0876	6.96943	9.35053	1.63698	0.636777	1.51185	-0.507561	-1.71974	-1.29589	6.24189	3.78682	5.06895
705	3.84258	2.16954	2.27451	2.22904	5.11511	1.96883	3.92348	5.5985	2.53429	5.72602	5.25933	4.95571	3.9709	6.31862	4.14158	705	2.29135	1.33042	1.88039	2.44509	6.43708	4.98934	1.74826	2.09579	3.27774	6.31687	5.26616	5.05665	0.270116	3.20702	2.65787	3.90836	3.91519	2.9808	4.38442	7.55385	9.33909	1.15097	0.457571	2.33933	0.597688	-1.84624	-1.26055	6.14917	3.30551	4.73757
706	3.37826	1.69666	1.98146	2.74157	4.60535	2.2814	3.60406	5.27667	2.44703	4.89379	5.81386	5.12219	3.47295	6.84878	4.32718	706	3.10266	1.69373	1.81499	0.757202	4.70931	4.25807	5.13077	1.1927	2.36873	6.0855	4.45351	5.37659	2.1864	4.25346	1.79263	4.59031	5.31608	2.37706	5.02552	6.28222	9.45478	1.9289	0.0932047	1.06587	-0.431109	-0.837148	-0.252178	5.45742	2.79494	5.78941
707	2.16941	2.76052	1.44704	2.63243	3.62979	2.78551	4.47524	3.76315	2.29879	5.57574	5.11471	4.30401	3.07957	5.41147	4.5864	707	4.83934	2.06441	0.775908	1.24695	5.68053	4.45568	5.17699	2.26975	4.3537	6.10576	3.71011	4.37684	2.70432	3.77921	2.11081	4.50066	5.11919	3.18341	4.13917	6.35324	9.28413	1.60719	0.0730034	2.33366	-1.69111	-1.77129	-0.00634589	5.37556	3.28608	5.08905
708	3.85478	2.33064	2.24357	3.45861	5.26346	2.17812	4.17526	4.82228	3.43983	6.54149	1.3042	4.65362	2.63449	5.38185	3.67393	708	3.02486	2.32758	2.15432	0.955591	6.04409	3.7905	5.2335	1.97117	3.51125	6.76507	5.04813	5.40141	2.85841	2.50996	2.55093	5.32666	4.74286	2.5968	4.06699	6.48488	9.17143	0.860751	-0.155276	2.60557	0.796307	-1.64591	-0.173941	4.87415	4.1138	5.66629
709	2.32623	2.77989	1.72997	2.95994	4.05385	2.09536	4.21784	5.68188	2.61731	5.65105	3.66454	5.06382	3.55264	6.85458	4.67387	709	3.89184	1.78237	1.42049	2.27195	6.55833	3.9561	4.72688	2.38447	3.12329	5.94518	5.34054	5.33111	3.12822	4.4682	2.25697	4.49729	5.44726	3.15461	4.33753	5.2596	8.73952	2.8613	0.718352	0.847369	0.267318	-2.06664	-1.64699	4.74838	3.67906	5.21054
710	3.2064	3.03013	3.25241	3.67862	3.8263	2.84725	2.88271	4.42617	2.00819	4.49606	5.20182	4.94414	3.57504	5.64473	4.63003	710	3.91517	2.57754	2.44241	1.68695	5.36577	4.6038	5.51314	2.15261	3.757	5.93999	4.54525	6.57384	3.33477	3.52931	1.81252	5.615	4.48523	2.45102	4.55256	6.01009	9.04132	-0.680809	-0.0180368	0.970041	-0.591291	-1.40312	-0.79069	5.83294	3.56089	5.48401
711	3.27521	4.04557	1.64072	3.73558	3.64022	2.11127	4.67301	4.53456	2.14441	5.22048	5.59646	4.90269	4.08324	5.12729	4.29805	711	2.96479	1.47787	-0.805704	0.665968	5.6529	4.31718	4.54414	1.62237	2.54919	5.93064	3.62287	5.54425	1.53662	3.11205	2.28349	4.58384	4.51323	2.74526	4.97921	6.8194	9.10965	3.05838	-0.140011	1.94319	0.209797	-1.82491	-0.517224	6.51427	2.95602	5.91851
712	3.73077	2.72092	2.01989	3.30864	3.2356	2.59712	4.12356	5.19662	2.61081	5.62476	4.36762	4.37463	2.74095	6.05702	3.70712	712	4.10505	0.880873	2.73383	2.03269	5.28275	3.36036	5.85237	2.58156	4.65424	6.67079	4.04264	5.74993	2.4039	3.93671	3.26039	3.63873	4.48258	2.81005	3.30141	6.15541	9.32074	2.59266	0.794114	2.36138	0.0360676	-1.38119	-0.746805	5.80482	4.45895	4.99238
713	2.25946	1.03726	2.37468	2.90671	3.63515	1.7495	4.32284	4.60864	0.782181	5.92676	4.7072	4.14367	2.50551	6.0683	3.26372	713	2.9629	2.39075	0.645189	1.67214	5.12275	4.40369	5.9636	2.76733	3.65264	4.5044	5.31907	6.06299	1.68019	3.32179	2.06263	4.36364	4.78253	5.01023	4.31976	6.27879	8.90438	1.72427	-0.536231	1.73278	0.479376	-1.94996	-2.68279	6.40547	3.31217	5.60962
714	2.98337	3.01654	2.0576	3.52678	3.42984	2.62004	4.70962	5.20848	3.01165	5.01758	4.81956	5.12383	3.06363	6.84423	4.18746	714	3.20642	1.8811	0.0364087	1.79944	5.40687	4.70344	5.35219	1.73808	4.72726	5.94165	4.2751	5.28032	2.42718	2.93731	2.25293	3.71162	4.57125	2.22895	4.28644	6.26776	9.45801	1.14761	0.345793	2.79152	0.692872	-0.819176	-1.06624	6.28845	2.43685	5.46242
715	3.47039	3.30524	2.52605	2.93485	4.92891	3.00394	3.48532	4.96259	2.20023	5.70459	5.23724	4.00397	3.46929	5.68127	4.54927	715	3.44968	2.14054	1.26894	1.29975	5.38236	4.21529	6.38412	2.12558	4.29804	5.6603	3.28513	4.90407	2.1864	3.76695	2.61696	5.03578	5.35387	2.94062	4.50921	6.73272	10.0314	1.4402	0.353772	1.11445	-0.0780766	-2.20603	-1.68063	4.90659	4.42365	5.23286
716	4.10466	3.28884	1.9341	4.07669	4.23539	3.12881	4.88928	3.39844	1.82238	5.34436	5.77149	4.25098	4.88583	5.5858	4.32167	716	3.33395	2.04247	1.55231	1.96448	5.98085	3.80445	5.64572	2.24405	4.1601	5.87326	4.36333	5.07599	2.19775	3.79036	3.07019	4.04422	4.61549	4.54184	4.62577	6.44392	9.42083	3.22136	0.183033	2.03828	-0.425788	-1.51944	0.604222	4.5452	3.88698	4.29848
717	2.67471	3.44246	2.03297	2.3981	3.50674	2.4987	3.15126	5.14197	2.73815	4.1777	3.97562	3.54725	2.50746	6.4838	4.02898	717	4.13595	1.67806	1.22626	0.940457	6.21864	3.59082	6.60127	1.84503	4.52134	6.33851	2.85577	5.90699	2.25861	1.71575	3.31844	4.34596	4.37175	3.99064	3.69713	6.07597	8.74527	0.927756	-0.10072	1.46527	-0.18051	-0.435004	-1.06413	6.54593	3.44656	6.15435
718	2.4711	2.21796	2.24645	3.29563	3.5751	1.78841	4.43518	4.19164	1.73649	4.65877	1.26252	4.12247	3.78551	6.54858	4.31475	718	2.90575	1.40407	1.79094	1.37642	6.07116	3.91373	6.29009	2.06119	3.24267	6.18117	3.98928	4.49697	1.44037	3.04757	2.32926	4.93457	4.30901	4.09887	4.93415	5.61668	9.14988	0.256958	0.224895	2.75271	-0.589568	-2.55879	0.485324	6.75518	2.79221	4.47724
719	2.53951	1.20449	1.86787	2.8256	4.07603	3.03152	3.62558	5.52806	1.75612	5.78237	5.73165	2.61639	3.48024	6.42417	4.14057	719	3.65275	1.79101	0.392132	2.20897	5.22932	4.38012	6.31343	1.45272	3.44426	6.92789	5.36779	4.24416	2.35074	1.80665	2.1174	5.16947	3.42852	2.90545	3.84962	6.23248	9.20138	2.73637	0.683664	2.02328	0.0949127	-1.53373	-0.475762	5.83673	4.18156	4.65965
720	3.26745	2.64153	2.36453	2.8843	4.48953	2.83615	4.05002	4.69669	1.1028	5.7547	5.24801	3.45139	3.40226	5.59884	4.97281	720	2.98882	2.27506	1.09019	1.95117	4.81678	4.79634	6.23342	2.14509	2.45876	6.19628	4.62662	4.64352	2.33168	1.6119	2.83369	3.3325	5.89708	3.4218	3.99563	6.87376	10.0078	2.27406	0.681599	2.05116	1.0478	-0.965859	-0.690195	5.59181	3.01894	5.02429
721	2.4788	3.37423	2.45503	2.63688	4.37371	0.90988	4.36777	4.88902	2.31423	5.40259	5.17503	3.72805	2.65861	7.41301	4.56071	721	3.55908	1.58556	0.990078	1.40715	5.26121	4.09851	4.77544	2.06395	3.85571	6.59283	3.6761	5.54156	2.31714	1.31081	3.19362	5.3232	4.63131	1.8051	4.26287	6.7869	9.69929	0.667312	0.670851	1.55224	-0.388851	-1.39137	-1.4954	5.46736	1.64132	4.73851
722	2.76977	2.01976	2.12058	3.06126	3.37905	2.59161	3.71808	1.25988	0.802684	4.51928	5.70337	4.25852	3.75137	5.8174	4.1774	722	3.0697	1.11956	0.555977	1.49094	6.72179	4.14662	5.78874	2.40279	2.40316	5.784	3.83002	4.75838	2.8225	1.12502	2.17994	4.32128	4.63061	3.34521	4.16331	6.3701	10.3552	2.1362	-0.241418	0.941075	-0.680783	-1.61898	-0.757976	5.16395	3.19986	5.31941
723	1.57134	2.81902	1.24283	2.13394	0.906224	2.24914	1.01967	4.03595	1.5051	5.79886	4.24608	4.64356	1.666	6.31597	5.61119	723	4.11307	2.00808	2.17439	1.62828	5.76045	4.13377	6.88638	2.24581	3.56711	5.30946	3.78817	4.06087	2.70353	0.754943	1.70476	4.682	3.88645	3.03054	3.41459	6.75916	9.12483	3.26452	1.08385	2.59156	0.475331	-1.00343	-2.67345	5.28698	2.85718	4.93353
724	3.11048	3.55206	1.76344	3.30826	2.81385	2.53764	4.0877	4.48773	3.01332	6.13455	4.23317	3.77705	4.62268	7.89671	3.4272	724	2.77693	1.73771	1.49825	1.59992	5.43957	4.18375	5.5839	3.01522	3.2833	6.41188	2.58978	5.51584	1.72554	0.84033	2.12647	5.68817	4.16596	4.08932	4.10813	7.15335	9.90917	1.5633	0.252701	1.73541	-0.086854	-2.03907	-0.890404	6.20512	3.53394	4.96935
725	3.09237	2.3168	1.46529	2.91909	4.25239	2.89205	2.69524	5.03821	1.89763	5.05408	4.53837	4.02194	2.03992	5.29974	4.77627	725	3.61941	0.514952	0.487908	1.22586	6.45945	4.02376	5.51121	2.34901	3.66287	6.72335	3.78042	5.03895	1.76033	0.707545	1.44577	4.05319	3.46598	1.77081	4.64189	7.10548	9.39892	1.9423	1.21323	0.960447	-0.246585	-0.88512	-1.10481	5.57766	3.86142	4.30537
726	1.73261	2.2917	2.33818	2.84751	4.32395	3.36928	3.72783	5.21437	2.10197	4.88596	5.06916	3.41237	4.5165	5.02	4.08959	726	3.85849	0.605003	0.625492	1.50475	5.02144	3.66961	5.05777	2.40741	2.94489	6.75678	3.60761	4.25431	2.59746	-0.803893	2.4909	4.31924	5.97175	2.44112	4.65248	7.2084	10.0011	0.17578	0.0174231	1.60363	0.762066	-1.63681	0.266481	5.73392	2.33227	5.54938
727	2.48546	2.80832	1.96743	2.83856	4.22155	2.74682	3.37277	4.97037	3.00301	6.43409	5.40322	4.73372	2.27544	5.98411	4.88666	727	3.84437	1.85716	1.7395	0.290326	5.37854	4.46272	7.15413	1.90501	4.26291	6.68596	4.49277	4.2792	2.02168	0.345874	2.87647	4.12725	5.04762	3.34045	4.7522	6.05257	9.84312	3.44203	0.220856	0.960637	-0.199921	-2.14215	0.416904	5.17118	2.44565	5.35576
728	2.81785	3.1734	2.64213	2.02599	4.39209	3.08784	4.24751	4.12411	2.93349	5.76852	4.62405	3.96365	4.13807	5.40704	4.79751	728	3.05451	1.82556	0.792133	0.883894	5.08022	4.72053	6.7759	3.00587	3.79737	6.10051	2.56104	4.88836	2.65836	1.00616	3.4325	2.70271	5.75097	3.51276	4.97097	5.89889	10.0399	1.73042	-0.113365	1.718	1.01075	-1.24903	-1.42401	5.92186	2.13495	5.94575
729	1.71921	2.99651	1.35827	2.69815	4.30548	2.68691	3.02533	5.01265	2.83645	5.16929	5.90236	3.84596	3.5038	6.31634	3.90012	729	3.55225	1.75477	1.57958	1.24274	5.837	3.53767	5.21288	2.60476	3.69714	6.85703	4.31789	5.14307	2.33714	-0.17371	3.75147	6.16183	5.91387	3.10594	3.68802	7.09565	9.53318	1.48882	-0.20611	1.57799	0.392276	-1.41719	0.071253	6.55837	3.18261	6.8538
730	1.09756	3.19978	2.03349	2.27014	3.57436	2.79219	1.75622	4.81437	2.25952	5.76791	6.45849	4.98639	4.24893	6.92194	3.96812	730	2.41	1.5979	1.17775	1.20417	5.87049	4.17317	6.56254	2.08883	3.33159	6.59006	4.85879	4.98407	2.13779	0.82522	2.18319	5.01739	4.65848	3.0028	3.9131	5.97918	9.48911	3.37009	1.11522	1.98444	0.160209	-1.04552	-0.761116	5.06798	3.21838	5.68334
731	3.16835	3.41913	2.58811	4.09402	3.81955	2.07879	4.03791	5.35393	2.75824	5.39173	4.85297	4.5299	3.50214	5.57942	5.24171	731	3.81595	1.46863	-1.28256	1.61505	5.5339	3.82	6.88688	2.98618	2.71354	5.77024	4.27574	4.09736	2.71834	0.279216	3.27786	4.96054	5.27848	3.83431	4.28924	7.28803	9.46232	2.43129	0.33974	2.86484	0.078763	-1.55045	-0.669328	6.60673	2.55212	5.14296
732	4.06224	2.68086	2.78204	2.82164	4.13177	3.02662	4.39547	5.03617	2.83331	5.42784	4.576	5.08081	3.17017	6.40375	4.28925	732	3.41377	1.00164	1.46878	0.671298	5.17338	4.48316	4.4072	1.61596	3.75483	6.57941	3.78623	3.41595	2.61113	0.699256	2.39496	4.72558	6.01765	3.5514	3.74313	6.04687	9.7196	1.59961	-0.0528202	2.22096	0.629171	-2.0258	-0.456663	6.39264	4.50108	5.11517
733	3.19093	2.41843	2.9558	3.23455	1.61859	2.68197	3.45451	4.57682	0.390336	6.49546	5.62247	5.67879	2.05901	4.99412	4.82146	733	3.0502	1.13076	0.838422	0.253655	5.28531	4.60127	6.36207	3.24321	3.77789	7.04489	4.26106	4.63166	0.0276143	0.474587	2.43163	4.35765	5.73673	2.91832	3.36262	6.36151	9.36768	2.53414	0.931869	2.0018	-0.494459	-1.23796	-1.77646	5.29861	3.52234	6.01237
734	2.98906	2.74904	2.43899	3.21523	3.90521	2.21486	3.76082	4.66931	2.78898	5.74951	1.67925	3.96571	3.89966	5.19229	4.44391	734	3.867	2.06342	2.32286	1.30287	5.15883	4.3987	6.33789	3.23291	4.58031	6.28274	3.74478	5.33772	-2.5065	0.925097	2.88468	5.50016	4.59785	3.10102	4.11857	6.1935	10.4293	2.24689	-0.139464	2.41758	-0.204748	-1.8029	-1.39821	6.9253	3.94474	6.62539
735	2.68973	2.65858	2.9272	3.74232	3.83233	1.52963	2.09735	5.33407	-1.38841	4.64123	5.46754	4.26817	3.17626	6.37761	4.74519	735	2.797	0.50552	0.553912	0.696377	3.86755	3.35805	5.70896	2.70154	1.70462	7.2727	2.72923	4.80701	2.19886	1.70192	2.22449	5.52418	4.77938	2.91676	4.15177	6.47703	9.33328	1.54546	-0.524426	1.75853	-0.802271	-1.46562	-1.52341	5.26486	2.1437	4.94284
736	4.57751	2.1167	2.62549	3.24361	4.18087	3.0176	4.37465	3.90664	1.37551	4.15937	3.13156	5.11159	4.08395	5.6901	4.97127	736	2.54464	2.20029	1.38265	0.978474	5.03053	4.56995	5.53936	1.54893	2.96396	7.03432	3.83217	4.58515	2.88621	3.44425	3.11566	5.00015	4.64654	3.26202	3.49131	6.26242	9.94837	1.06708	-0.67926	1.88338	-0.815278	-1.36316	-0.214197	6.96908	2.79897	5.53968
737	3.35381	2.36602	2.0176	2.72587	4.03626	2.77468	3.13352	2.17534	1.64527	4.2079	5.42921	4.19112	3.7881	5.90151	4.70661	737	1.85317	1.74007	2.12963	0.443992	5.62393	3.32491	5.55133	2.6796	2.9805	6.47384	4.69242	4.80834	2.47732	3.73745	3.34755	5.10182	4.40018	1.72601	4.16476	5.35641	10.4267	2.60884	-0.279807	2.85925	0.207742	-0.477489	0.124742	5.9554	3.78876	5.68197
738	1.90268	2.41994	2.60629	2.74483	3.23422	2.67027	2.92119	4.63638	1.60684	4.91202	5.48417	5.17711	2.26259	6.26009	5.27279	738	2.70378	1.15531	0.174588	1.25649	5.59246	4.01188	4.64837	3.4044	3.50806	6.04144	4.42656	2.93001	2.62384	2.45155	2.44245	5.51181	5.32855	2.23714	3.17211	6.98525	9.93783	-0.138655	0.77432	1.77971	0.597788	-1.8434	-0.695473	6.60464	4.17068	5.56281
739	3.32903	2.61577	3.10477	2.25084	3.74893	1.90296	1.65892	4.21786	1.71333	5.57347	4.67989	4.98281	2.59624	6.39321	4.84252	739	2.99596	2.27894	1.43287	0.137278	5.61301	3.70404	6.19996	2.64729	2.80656	6.29238	3.97501	5.0462	2.32464	2.74229	2.99985	5.25654	5.40722	2.23728	4.88206	6.3121	10.0535	1.25176	0.857981	2.38242	-1.53345	-0.745303	-1.87137	4.7427	3.06559	5.38238
740	2.56768	2.02362	1.63673	3.44008	3.43428	3.17558	3.00718	4.66575	1.53754	4.72996	5.26902	5.55214	4.44674	6.30821	4.77931	740	2.97466	0.958486	-0.252071	1.11501	5.37794	4.05605	6.07049	2.75565	4.46951	6.44812	3.91434	3.10538	0.752536	4.3117	2.32084	5.65124	4.17531	2.3865	5.20462	6.21199	9.68048	2.29476	-0.294991	2.26623	-0.465607	-2.4643	-0.183078	5.88318	4.1285	5.06788
741	2.79923	2.5709	3.06043	3.1347	2.55038	2.89362	3.52168	4.89569	3.93342	4.44	4.92026	4.33291	4.92125	6.32319	4.84595	741	2.25198	3.1603	1.07445	1.46093	4.57113	4.28277	6.07298	2.67673	4.35153	6.68435	2.42177	3.44609	1.72081	3.09567	2.42384	4.47097	5.37755	2.36567	5.34151	5.61509	9.34056	2.06331	0.182175	2.32169	-0.5151	-1.50641	0.181452	4.96318	3.27299	6.25099
742	1.33718	2.95192	1.72739	2.15577	5.03923	1.9018	2.75108	4.69553	1.45473	5.41746	4.51888	5.23117	3.07619	4.51813	4.48446	742	3.07077	1.54367	1.22421	0.712682	5.03312	3.7765	6.085	2.22707	3.63072	6.71809	3.8116	4.84831	3.13281	3.0785	2.72817	4.51981	5.66707	2.7307	4.33889	6.26248	8.72498	0.977529	0.426446	1.59423	0.390771	-0.845287	-1.22263	5.06041	3.39387	4.94852
743	2.90322	1.5138	2.32333	3.63839	4.12327	2.03812	2.69111	4.39988	0.578917	5.07103	5.53834	3.90763	2.3694	6.71266	4.99587	743	4.03953	2.93117	1.13244	0.14435	6.14151	3.89992	5.042	2.72267	3.17061	7.18017	4.41004	4.11963	1.49529	3.06737	3.65773	4.69388	5.80429	2.1128	5.19855	6.26826	9.81244	2.03409	-1.10822	2.3558	1.02697	-2.12108	-0.73756	5.23299	3.54476	5.52898
744	2.25098	3.60818	2.9299	3.64947	4.44758	1.40161	2.06928	2.10742	2.05677	5.58994	5.86611	4.93002	2.64435	6.73794	4.22654	744	2.6626	1.74568	-0.416141	-0.657577	5.72537	3.87104	5.39508	2.35677	3.84071	7.77055	3.46619	4.68583	3.18988	3.54218	2.18491	5.32977	5.67485	0.691707	4.81538	6.50915	9.99662	2.17245	-0.141718	2.65675	0.0989287	-2.35145	-0.306508	5.65918	3.46256	5.54898
745	1.64797	2.57538	2.42609	2.99473	4.7626	2.63752	0.244757	3.35011	1.49944	5.41205	5.39539	4.51392	2.94798	6.52138	4.03368	745	2.81728	0.977244	0.325476	0.437313	5.44876	4.43756	5.9752	3.85327	3.63665	6.20763	2.47176	4.32339	1.48604	3.77556	2.34435	5.53248	6.77008	3.10456	5.07279	4.54304	9.65591	1.74276	-0.0868751	2.5497	0.420825	-1.98681	-0.817447	5.71856	4.04898	5.22045
746	2.86494	1.93223	2.35504	3.07286	3.79425	2.41739	4.98349	4.16096	2.02569	5.13396	3.19483	3.87164	4.32457	4.52092	4.9072	746	3.29457	2.28007	1.48677	1.21256	4.57637	4.22506	6.68229	2.29114	3.01679	6.13586	3.1953	3.81559	2.74212	3.49503	2.57938	4.31335	6.39908	2.27602	4.65357	6.97675	8.77117	2.31733	-0.387833	2.67508	-0.135222	-2.16305	-1.34156	5.78312	4.19552	4.63925
747	1.98544	3.14799	2.27475	2.38197	3.7238	1.67215	2.06896	5.22038	2.77261	5.09302	3.18791	5.22444	3.8712	6.58908	4.1736	747	3.70992	2.87229	1.81868	0.724358	5.02485	3.74379	5.55969	1.99256	5.09738	6.04769	3.3167	3.24657	2.17749	4.11491	4.04202	4.91637	4.9865	3.1121	4.26664	6.83609	9.44672	1.29115	-0.741091	3.04502	-1.35102	-2.51119	-1.45391	5.86532	2.8899	6.30547
748	2.74989	0.875712	2.41783	3.22775	4.35374	2.28081	2.38708	5.30355	0.382958	4.61888	4.76115	5.33592	3.78154	6.67157	4.5601	748	4.40513	1.99996	0.482474	-0.027279	4.55796	3.46168	6.03492	2.19252	3.46211	6.62955	2.68022	3.86904	2.85626	4.28351	2.20185	5.20245	6.01438	2.27884	4.82414	5.36717	9.67028	1.4292	0.13762	2.88844	-0.638045	-1.0638	-0.534605	5.44929	3.68029	6.18762
749	3.52442	2.22061	2.65922	3.30722	4.5028	2.7613	3.8708	3.97879	1.07439	4.71047	5.96385	4.71005	4.89476	6.40127	4.30414	749	2.93011	1.57	0.794149	0.825414	5.76092	4.13865	5.74306	2.75897	2.52282	5.77756	1.63973	4.2743	2.643	3.0289	2.74937	3.90746	6.21408	1.55814	4.32886	5.76092	9.66177	2.09915	0.479148	1.95316	0.469246	-3.10167	0.450996	6.35212	3.09138	4.98892
750	2.2803	2.63124	2.50683	2.78749	2.78701	2.944	2.49025	5.62799	2.37799	5.05596	1.68441	4.17902	3.43974	5.3473	4.17158	750	3.65695	0.802785	0.977033	1.11697	6.18171	3.55973	5.05536	2.57563	3.40513	5.0353	3.47655	4.74419	-0.444314	3.42206	3.24256	4.52749	5.89557	3.33626	4.22109	5.40782	9.91301	-1.13239	0.633642	1.85351	-0.367992	-2.32664	-1.34824	5.16549	3.73099	5.80545
751	3.10348	2.51977	2.34481	3.33945	5.08564	2.23329	2.62836	6.07356	1.8227	5.93691	5.79622	4.24493	2.66653	5.93183	3.52554	751	4.47504	2.30153	0.126296	1.01873	5.65945	3.61771	7.32934	2.24056	2.72353	5.6373	3.95492	2.79596	1.52002	4.52785	3.62579	4.8587	4.56922	2.92396	4.71264	6.41378	9.37133	2.81858	0.0627018	2.08536	0.6243	-0.777761	-0.365887	5.58212	3.62747	5.83075
752	2.43247	1.57484	1.32388	3.47033	3.4867	2.36962	2.93393	3.95412	1.84806	5.64092	5.23085	5.08127	3.3855	5.74698	4.35564	752	3.0235	1.06553	0.642471	1.21356	5.51472	3.5594	6.24696	3.59147	3.4818	5.88103	2.90443	4.2953	-0.347345	4.833	2.74678	4.53142	6.99839	2.14741	3.43198	6.18909	9.60413	1.0273	-0.288396	1.85938	0.252735	-2.93213	0.0940632	3.70299	3.66398	5.69816
753	3.04878	3.81701	2.45684	2.84655	4.55613	1.9839	2.15935	4.06321	1.81627	5.65537	5.46282	4.21918	3.82181	5.84211	4.59263	753	3.34945	1.69821	-0.133184	0.612597	5.30188	4.56984	6.08687	1.72188	3.86454	5.47902	1.54543	3.35498	3.01616	4.57979	3.40026	5.11803	5.38376	3.1334	4.36941	5.79379	9.54888	2.29687	0.374768	2.51742	-0.251916	-1.65748	-0.126434	4.81026	2.53231	5.08838
754	2.14002	2.93835	3.22989	3.30702	4.45153	1.89115	3.51731	4.37258	1.88202	6.63465	2.5453	4.26516	2.99736	5.62089	4.07591	754	3.67772	2.38781	2.31403	0.222144	5.10746	4.54881	5.66674	2.20398	2.87598	5.64659	2.45232	3.31775	2.39551	3.52502	4.2423	4.84612	5.36484	2.88613	4.1402	6.66689	9.55653	3.10993	0.726299	0.57622	0.383527	-1.21681	-0.579209	5.50983	3.81435	5.63402
755	2.22943	1.86298	2.46474	3.77361	5.28301	2.6578	3.84796	3.83561	2.40606	5.29424	3.31163	5.14645	3.43472	6.54489	3.85028	755	3.70468	1.2464	0.990854	0.948288	4.73187	3.58239	6.21549	1.55406	5.02048	6.125	3.93174	3.18873	2.51291	3.73295	3.91632	4.51851	6.48763	3.00579	4.67705	6.87386	9.37336	1.51795	0.247881	1.08823	-0.924922	-1.52514	-0.0516363	5.42347	3.10591	5.60933
756	2.87711	2.70593	1.82312	4.10874	3.22292	2.26709	3.61433	3.84719	2.63304	5.10306	4.62282	4.41989	3.60083	5.16931	4.86168	756	3.88348	2.45154	0.302647	1.37476	5.21029	3.87951	6.464	2.95554	3.85865	6.41267	1.68273	3.07217	1.7545	3.44496	3.23456	3.48567	6.18885	3.00094	4.22618	6.63554	8.54616	1.7512	-0.235716	2.30308	0.0137989	-1.08054	0.24953	4.80632	3.40573	5.44903
757	1.86936	2.86147	1.95256	4.44074	3.55621	2.85078	3.5089	4.5114	2.16376	7.14964	5.17948	3.52734	3.20399	6.14284	4.22782	757	3.35122	1.12892	1.73335	0.398096	4.83625	4.05145	6.285	3.07691	4.19219	5.46806	3.43584	3.97121	1.92616	3.40892	3.4877	3.5845	5.33952	3.11823	4.58651	6.51559	9.4924	0.639943	-0.136673	2.57711	0.11429	-1.39784	0.817631	6.20349	3.97223	6.86923
758	1.97836	2.59726	1.8017	3.48166	3.36788	2.18548	1.50574	5.02428	2.47649	4.67894	5.40937	4.45104	3.89058	6.21984	4.31199	758	4.6596	1.22002	-0.0673478	0.510684	5.07767	3.38101	6.74382	2.52116	2.9663	6.14221	4.3008	3.5113	1.31986	3.21925	3.01719	3.82198	5.71067	2.25344	3.80945	6.89597	9.62536	2.13493	0.275142	1.00148	-0.666542	-1.16511	-0.358919	6.47675	3.16322	4.76058
759	2.5019	3.93484	1.35305	1.9631	4.72106	2.25975	3.35393	4.26585	0.939968	6.30837	4.97768	4.47045	3.07461	6.70951	3.98016	759	3.42101	1.22015	-0.206003	1.43151	3.76972	4.36536	6.38114	2.54322	2.83818	6.29478	2.69191	4.90604	0.919147	4.38907	2.19136	5.12064	5.18497	2.56512	4.30188	6.60799	9.44361	1.93923	0.809368	1.29992	-1.09367	-0.715558	-0.0731223	6.21995	3.8308	5.93215
760	2.49468	2.32979	1.7083	3.88172	3.78431	3.25661	3.18662	2.57069	3.72481	5.55897	3.74402	5.21287	3.68868	5.77183	3.51111	760	4.17479	0.906053	1.37534	0.541763	4.63018	3.6209	6.63117	1.63543	3.00752	6.21251	3.82754	4.8858	2.70668	4.30844	3.27035	3.19119	5.49159	3.06478	3.89766	6.58669	9.3915	1.7226	0.372723	2.16982	0.65594	-1.70657	-0.266585	5.01899	2.57416	5.63379
761	1.99495	3.34478	2.65411	3.55659	3.87098	1.63171	2.27504	2.99025	1.43098	5.12577	2.80227	5.18001	3.64738	5.98182	4.28896	761	3.26998	2.24808	0.23022	1.85211	4.87278	4.45196	5.27251	2.94886	3.52645	4.99747	3.72345	3.51973	1.9085	3.72182	2.70022	4.2329	5.63421	2.18488	3.80075	5.78834	9.17581	3.14778	0.209711	2.68659	-0.405128	-0.824837	-1.12073	4.31153	3.62057	5.71389
762	2.733	0.620055	2.72257	2.52987	4.92964	2.98409	3.21876	4.03505	2.98596	5.58657	5.39108	3.94758	2.90127	5.48206	3.95599	762	3.1093	1.19586	0.67647	1.32711	4.64338	2.97833	5.34795	3.41866	2.1285	6.21371	2.56387	4.41993	2.37872	3.86031	3.28905	4.93433	6.14208	2.32308	4.45291	6.43005	10.4473	3.30049	-0.453359	3.11103	0.570326	-1.68063	-0.342245	5.11686	3.39983	6.92499
763	1.55175	4.0037	3.27119	3.51681	4.78202	2.60832	3.30507	4.75569	3.47253	4.65708	6.33005	3.91033	3.52987	7.20147	4.13273	763	4.14437	-0.424061	0.834478	0.685323	4.05304	3.75211	5.59864	3.04404	3.48717	5.25591	3.38979	3.97539	2.57124	4.67027	2.53825	4.04462	5.48134	1.95196	4.14023	5.97972	9.01686	1.10269	1.09763	1.41421	-0.022882	-1.66577	-0.657092	5.81714	1.9998	5.49269
764	2.31562	1.80312	2.66825	4.42399	4.37279	2.75295	3.15198	4.84057	0.489139	5.30231	5.63403	4.35957	2.81734	4.56098	4.35853	764	4.18451	1.72655	-0.204644	1.12923	4.60714	4.25129	5.52749	2.66257	2.36784	5.62743	4.28126	3.80787	1.89143	4.22763	3.35713	4.75164	6.31708	2.40883	4.20826	6.63969	9.98624	2.46632	-0.701164	2.14118	-1.36937	-0.141314	-0.58152	5.982	1.81724	5.34825
765	2.60537	3.43884	1.79544	3.36262	4.2271	0.851927	3.2775	4.13166	-0.562761	4.41099	4.51436	5.27048	4.07542	6.75567	3.68732	765	3.30741	2.54549	0.64203	-1.35782	5.16615	4.62841	6.53524	1.32586	3.20399	5.12676	4.18594	4.23537	0.26184	3.50193	2.71051	4.38658	4.32194	1.28258	3.77053	5.92604	9.98206	2.87348	1.03875	1.64145	-0.299757	-1.72979	-0.42128	5.0886	2.86528	4.89952
766	2.62303	2.44843	1.9579	2.68678	4.22164	3.45156	2.02178	4.11091	1.04068	4.35028	5.70175	4.66599	2.87393	4.55631	3.81116	766	2.4195	2.39763	0.966397	1.49351	5.29009	4.04191	5.41138	2.14539	3.6522	5.50941	4.73723	2.78546	2.62981	4.40356	3.46442	4.10407	5.7281	0.795411	4.13445	6.50221	9.62857	0.0660734	-0.775633	2.43537	0.087493	-2.30721	-0.702658	4.51356	4.33087	5.44894
767	2.59719	0.875628	1.43295	3.85154	5.09779	1.61502	2.75638	3.97548	1.15147	5.75625	5.22026	4.1996	2.79801	7.50237	4.13507	767	2.94757	1.73343	1.2722	0.955481	5.46511	3.83754	5.21082	1.58971	3.61125	5.21661	2.47944	2.96211	2.74375	5.1028	2.32353	3.90373	4.28117	1.10322	3.51882	6.06546	10.3991	1.41606	1.00077	3.20422	0.356483	-2.45149	-1.25205	5.34252	3.88042	6.41735
768	3.63799	3.35174	2.30437	3.68267	3.57828	2.29966	3.88215	3.29452	0.691672	4.29013	4.89955	4.5598	3.37988	6.88844	4.30519	768	3.25101	1.04368	1.34316	0.629901	4.40296	4.32845	5.96757	1.43638	2.90673	6.07999	2.14396	3.95083	2.73936	4.98548	2.84968	3.7983	5.13628	1.43592	3.21128	6.72616	9.35812	2.82058	0.621769	1.68446	0.156279	-2.17922	-0.654569	6.17886	3.48306	5.728
769	2.96252	1.75659	2.40975	3.38762	4.74007	3.09738	4.77101	4.73455	2.97831	3.99413	5.29113	3.83609	3.12213	7.08225	4.41679	769	2.91006	1.22133	0.154211	-0.13671	5.57853	4.96323	4.6805	1.76461	4.24651	5.23803	2.16516	3.44293	2.16628	3.66837	2.77821	3.69714	4.86351	2.30381	3.77831	6.25503	10.238	2.55336	-0.366185	1.29154	0.712886	-1.85005	-1.22249	4.8071	2.91491	7.12175
770	4.07382	4.17424	1.56187	2.78163	3.9313	2.4415	2.78573	1.84382	1.645	4.85768	0.630867	4.30677	2.6524	5.57895	3.5697	770	3.79894	0.569525	0.914823	0.417672	4.99146	3.41608	3.61397	2.97285	3.71624	5.33918	3.95647	3.79803	1.60507	4.30298	2.90072	3.51597	5.45536	0.285825	3.56438	5.77845	9.93222	2.09922	0.348273	3.31881	-0.778711	-0.97726	0.92145	5.33916	3.33758	5.77981
771	3.56845	4.55145	1.8675	2.96089	4.51531	1.81517	3.88428	4.67598	0.960362	5.13334	4.54071	2.80577	4.12675	7.44836	4.79378	771	2.73967	0.693767	0.178148	0.654433	5.47943	3.8976	3.79437	2.69815	3.42474	6.06414	3.47807	3.10095	1.34065	3.37195	3.19773	4.17047	4.42722	1.66085	3.90342	5.18305	9.70264	3.17128	-0.0072956	2.12201	-0.804521	-1.36904	0.407376	5.85212	3.67803	6.06132
772	3.92089	0.854288	2.72414	3.7883	4.24056	2.29358	0.914245	5.29298	1.15205	4.17505	3.70254	4.81539	3.69598	4.94693	3.88936	772	2.80034	1.57505	1.39235	0.368517	4.58315	4.17063	6.16043	2.18609	3.34605	5.7984	3.75345	3.25209	2.14633	4.11075	3.27674	3.54061	5.7133	2.30421	4.51018	5.71451	9.27782	2.41683	0.563227	1.47401	-0.0875423	-1.15414	-1.40321	4.57371	3.61929	6.41247
773	2.10993	2.35263	2.47289	3.55391	4.31897	2.12066	1.10623	3.67446	-4.1771	6.02659	4.58206	3.88618	2.82455	5.31436	4.0948	773	2.85852	1.79278	1.14734	0.890509	5.0268	4.91181	5.13789	2.66245	3.99335	6.33385	3.37911	5.05133	2.36945	3.35144	2.81683	2.84754	4.53586	1.95667	4.26531	5.7617	9.56496	1.51745	-0.169011	2.84729	0.140604	-1.82539	0.0779537	6.58063	3.14937	6.22874
774	2.16578	0.183978	3.51228	3.70966	3.78609	2.74334	0.760309	4.55535	0.678422	5.12798	4.6991	5.31556	2.77922	6.59869	4.1713	774	2.1163	2.09091	1.1906	0.857804	5.51357	4.59427	5.56254	2.17655	2.86353	5.23366	3.74199	3.65166	1.53663	3.70369	2.73812	3.30476	5.32676	3.02764	4.73251	5.81098	9.69965	1.64752	-0.806089	1.88858	-0.316096	-0.909987	-0.652035	6.2566	2.96222	6.45512
775	4.00779	2.44503	3.74582	4.24761	3.65839	1.21632	2.56291	5.33556	1.94582	5.69399	5.04377	4.05959	3.57781	6.29436	4.09129	775	3.42259	2.31337	1.07927	0.123671	5.5052	4.17319	6.03744	1.93216	3.88048	4.49243	3.20373	3.3015	2.67786	4.69888	3.11806	4.81262	5.80227	2.32791	4.07225	5.97095	9.00533	1.98952	0.0723239	1.85724	-0.320321	-1.39554	-0.353888	6.3508	3.03553	6.13339
776	3.6927	3.29125	2.70192	4.32723	3.81953	1.94764	1.81349	3.84046	1.97525	5.71458	5.59872	4.27794	3.80691	6.44376	4.27799	776	3.1373	1.12223	0.75206	0.851778	5.36124	3.27611	4.68798	1.27497	3.46143	6.37004	4.66018	3.9314	1.27545	3.91059	4.5011	4.17061	6.31265	1.72737	4.82564	6.17929	9.98594	0.474949	-0.179034	1.77811	0.0662876	-1.44701	-0.889305	5.86924	2.90605	5.46414
777	3.35218	3.62143	3.06638	2.9595	3.81957	1.82235	0.545	4.35909	1.82228	4.48805	2.43945	3.95545	1.87281	5.95714	3.96969	777	3.43927	0.805509	0.223709	0.606898	5.7181	3.60267	4.43833	1.99665	3.57788	5.99237	3.52682	3.69571	2.57113	3.12047	3.44657	4.63487	5.86253	1.03697	4.57483	6.0809	9.64564	0.790335	0.274873	2.00519	0.200692	-2.28444	-0.941339	4.89927	2.04302	5.96888
778	2.30336	2.20548	1.18283	3.88399	5.04428	3.22806	3.05731	4.33897	1.23813	4.91582	5.2422	5.45994	3.81425	5.04991	4.56798	778	2.93297	1.3631	1.63312	1.11664	5.59019	3.94536	5.60027	2.30554	3.9983	5.01734	2.68974	2.47636	2.11164	4.76788	1.74277	4.26238	4.8818	1.56688	4.25958	5.66766	10.0737	3.40672	-0.943	3.03723	-0.322581	-2.19132	-0.966672	5.70125	3.11105	6.03465
779	4.71971	3.74638	1.73593	3.23497	4.41309	2.03671	1.68257	4.40535	1.02554	3.08878	2.20486	4.06912	3.93302	5.92799	4.33072	779	4.34457	2.17897	1.52391	0.0350168	4.72149	5.10905	5.34371	2.00298	3.45455	5.84431	2.91346	3.54577	2.29105	5.57392	3.16863	4.49129	5.61243	1.63885	4.45647	5.91621	9.63977	0.987338	-0.657392	1.81102	-0.620215	-2.94681	-1.54912	5.87624	2.53635	4.94803
780	3.08651	3.12092	1.15618	2.21415	4.22451	3.40741	1.83951	2.88507	2.36883	5.86227	4.89965	5.17002	2.97619	6.48886	3.46798	780	3.08524	1.77777	0.483943	0.193432	5.16397	5.37712	4.71845	1.94769	2.81647	4.72358	3.35003	2.92533	2.54455	3.75555	2.9351	3.56711	5.13936	2.3193	3.9704	6.32536	9.97622	3.10373	0.000917645	0.855902	-1.01495	-1.28358	-0.148224	5.72438	3.01458	5.40477
781	3.68294	1.41332	2.41705	3.40415	4.27519	2.02439	1.93732	3.09455	1.07319	5.09818	6.15469	5.49194	3.31474	5.81873	3.44533	781	2.91614	1.74993	-0.347283	-0.179806	5.57388	4.10182	4.37979	1.48291	3.64522	5.01529	2.97906	4.51392	1.44987	3.86336	3.40866	3.26929	6.54105	2.40909	4.14914	5.85223	10.8629	2.9412	-0.857277	1.58469	-0.0560548	-2.70573	0.0965814	4.76641	3.26119	5.12742
782	3.66633	3.22017	1.10038	4.32294	3.71865	3.18915	1.66528	5.01849	2.06586	6.43564	4.29554	5.52076	3.325	6.52361	4.94807	782	3.22566	2.76345	1.3824	0.306113	5.11492	4.2991	4.02883	2.75798	3.24412	6.03703	4.09998	2.89461	2.05774	5.35868	2.75638	4.46588	5.40541	2.01664	3.6588	6.24034	10.1334	3.40689	0.291068	1.82195	1.33419	-1.37063	-0.295095	5.87964	3.51207	4.95127
783	2.41726	3.40121	2.58099	3.45838	4.98313	3.04264	4.24154	6.13632	2.14646	6.16197	4.6429	3.93914	3.50434	6.13541	4.90225	783	3.26638	1.68877	0.598957	1.12574	5.27448	4.29413	4.25195	3.19651	2.94806	4.54693	3.03751	3.14618	2.09406	5.30372	3.06359	3.52644	6.51192	2.28989	4.3117	5.23025	10.2801	2.83112	0.704685	0.96094	0.27967	-1.54899	-0.340712	4.74102	3.13866	6.22377
784	2.22076	2.74213	2.92816	3.34349	2.00541	1.91792	1.02764	4.70109	1.19208	5.40642	6.17489	5.45939	4.37519	6.47678	4.60036	784	3.18363	0.925791	1.36276	1.07941	3.66522	3.04745	3.42816	1.04427	2.03773	5.54629	3.83532	3.51372	1.89293	4.46374	1.74738	4.58444	4.62503	2.13584	4.38877	6.34496	10.3683	2.45258	0.745922	2.11128	0.462529	-1.06773	-0.409922	4.44492	3.42086	5.10028
785	3.59509	2.89663	1.73882	3.68895	3.27283	1.97595	1.43043	4.95734	-0.0239984	5.10934	4.90559	5.11111	1.91207	7.31451	4.76398	785	3.08165	1.28313	-0.400507	0.321841	5.26487	5.40853	6.05245	1.86509	3.45642	4.78072	3.11231	4.31616	2.2795	4.0964	3.7527	2.30221	5.07757	3.33483	4.85524	5.39147	9.65559	2.23359	0.458741	1.90606	0.109007	-2.28691	-0.60787	5.74133	2.58135	6.03278
786	2.25728	3.25434	2.4511	2.23862	3.31219	3.01511	0.33895	4.95675	2.11698	4.58151	4.67612	4.01978	3.46715	6.42722	3.8118	786	4.11112	1.7936	0.840398	0.727399	5.71201	4.38979	4.7008	2.12245	3.48825	4.43547	3.03127	3.00397	2.85181	4.58581	2.85299	1.85651	4.71756	2.37682	4.0188	5.52149	9.28157	3.0057	-0.08704	2.64239	-0.411191	-2.10601	-0.858947	5.28544	2.54806	4.96123
787	2.54122	3.49703	2.91545	4.27657	3.62487	2.24303	3.0883	4.46062	1.85262	4.46074	4.0125	5.53188	3.3334	5.74572	4.00412	787	2.7432	0.871446	1.6697	1.57915	6.11752	4.67477	5.05521	3.56804	2.86538	6.83045	3.73922	4.57227	1.70119	4.47411	2.54276	3.2639	6.17995	3.05442	4.73143	5.3373	9.20993	1.26921	0.324837	2.49197	0.569144	-2.83141	-1.12719	4.89621	3.91144	4.87151
788	2.2596	3.29002	2.79194	2.56237	4.41396	2.33423	2.44368	5.54774	-0.444323	4.98196	2.15677	4.48765	2.76023	6.95463	5.0677	788	3.55399	1.03742	0.127685	1.13696	6.98117	4.366	4.49719	3.04193	2.75262	5.46979	4.0259	4.78121	1.85075	4.94614	2.13354	2.72968	5.44449	2.44781	4.27171	5.5507	10.1696	2.1834	-0.418523	1.24357	-0.0924081	-0.84395	-0.38087	6.21856	1.80984	4.90213
789	3.80899	2.90481	2.01641	3.28617	5.01463	0.416127	1.91943	2.12354	1.40373	4.80231	4.72117	5.21463	2.38797	3.36574	4.39818	789	2.15735	1.04436	0.676435	0.636168	5.75817	3.40385	5.61114	1.80337	3.69512	5.34837	3.63494	2.51705	2.97416	5.19718	2.60607	2.68966	4.68231	2.50822	4.25249	4.90777	10.0578	3.07217	-0.833341	2.13186	-0.548092	-0.967765	-0.350594	5.40062	3.29362	5.81192
790	2.7055	2.11102	0.937323	3.42118	3.51602	2.12306	1.77623	5.1587	0.377918	3.86266	5.09773	5.02465	3.74228	5.11135	4.16852	790	3.26034	0.895921	0.489735	1.37898	5.55444	4.91099	4.76296	2.57503	3.44392	5.83556	3.10225	3.16255	2.01337	4.11966	2.70271	3.49399	5.49311	0.932006	4.29993	5.38746	9.58973	1.62644	-0.0495129	2.38355	-1.52639	-2.3135	-0.351248	4.58657	3.57973	5.04577
791	3.20524	1.88144	2.70922	2.66144	3.61965	2.66269	1.11766	3.27595	-0.438615	4.64984	4.65003	4.9114	1.01398	5.93271	3.42273	791	2.37454	1.59997	0.323468	1.2333	5.28096	5.41094	5.47357	2.16191	3.89529	5.72233	3.07579	1.81015	2.63723	4.47338	2.97985	3.82322	5.60246	0.808823	3.83068	5.95995	9.31367	3.38428	-0.335857	1.92647	0.340329	-1.76983	-1.3799	5.41004	2.56786	5.35978
792	3.01879	3.80995	2.32865	2.98466	4.9442	2.38137	3.29877	3.90696	1.35129	5.06916	5.02184	5.11487	2.3802	6.3065	4.84333	792	3.3243	2.30322	-0.479211	1.57311	5.17364	6.14408	5.01465	2.04669	2.5516	6.56045	2.75975	4.34602	2.23011	4.72589	2.3548	3.07623	5.11868	3.34385	4.30904	5.59451	9.34069	0.220998	-0.26097	1.50776	0.559246	-1.36454	-0.505373	5.2119	3.38774	4.57793
793	4.09873	1.54561	2.9858	3.90964	4.11432	2.5366	2.57359	3.71007	1.55749	5.7444	4.74201	5.56223	2.79507	4.68068	4.26637	793	2.77663	1.6608	0.387085	0.283434	5.46541	5.60323	4.21603	2.1857	3.21984	5.50219	3.35515	4.83417	1.23601	4.24613	1.87779	4.52261	3.30108	2.28257	4.486	6.09325	9.60807	2.66949	-0.397774	1.20265	-0.584346	-1.73406	0.335157	6.00927	2.53821	6.25407
794	1.31176	0.901104	2.36921	3.56954	2.68738	0.768289	2.90629	4.27859	0.944763	5.01295	5.04788	4.85711	2.49779	5.13489	5.0582	794	3.1329	1.09974	1.3979	0.591897	5.85417	5.2994	4.96624	2.5266	1.98803	5.12772	3.2724	3.2323	1.02076	4.20842	2.27482	3.71996	5.28792	0.71994	3.62655	4.78712	10.3221	2.87445	0.401417	2.50499	0.126343	-1.65593	-0.498502	4.88939	1.44846	6.12251
795	3.33648	0.923721	1.84402	2.23336	4.29772	2.63434	1.21186	3.96929	1.11306	5.41185	5.81798	5.33155	3.4502	5.57976	4.06591	795	2.2006	0.952447	1.68169	1.13771	5.91209	4.91234	4.31698	2.60434	2.97314	6.03807	1.75742	3.80608	1.10488	3.27528	2.332	3.14583	4.40453	2.53281	4.5445	6.03509	9.27573	2.19913	-0.594073	1.33408	-1.31109	-0.779599	-1.02912	4.15552	2.27895	5.24015
796	3.02748	2.71484	2.24216	3.53047	1.20194	3.02012	2.66404	3.19336	3.08638	5.41754	4.98043	5.09606	2.43938	6.25627	4.77518	796	3.10717	1.79849	0.980915	1.52641	5.8272	5.85279	4.10544	1.74641	3.73374	6.04027	3.34388	3.54429	1.95532	4.11014	2.75073	4.31276	5.13241	2.16889	4.63246	4.28106	9.53062	2.41154	0.0925263	1.61351	-0.225707	-1.29334	-0.697552	6.78	1.16496	5.18454
797	2.43973	3.07515	2.33618	2.23435	3.13141	1.73146	3.07596	4.34963	1.14543	5.93736	3.98309	6.17334	2.31736	5.1634	3.46721	797	2.76506	0.878342	1.72782	0.163431	6.136	5.7584	3.74082	1.83836	3.99377	5.13822	3.09251	3.10948	1.65915	3.87088	3.05274	3.25158	4.07922	2.99548	3.6128	6.05365	9.52856	2.93862	-0.732122	3.35846	0.842496	-0.718007	0.368006	5.38099	2.42868	5.05172
798	2.74488	3.19849	2.40222	3.01048	5.31568	2.31735	1.62581	4.70771	1.3694	4.45758	4.1034	5.18766	3.62924	6.04858	4.89557	798	3.56868	1.92335	1.3407	0.194367	5.66311	4.68712	5.12023	0.879889	2.64461	6.38222	3.55773	3.51984	1.47527	4.99348	3.04891	4.15936	4.96677	2.51495	4.08418	6.55081	10.1302	4.89362	-0.371593	3.13431	0.252659	-1.01123	0.308119	6.07652	3.41765	4.84971
799	3.88106	2.03085	2.18919	2.78031	3.29413	2.45736	2.25621	3.15754	1.33975	4.9055	5.27518	5.34207	1.64777	5.62816	4.23406	799	1.96529	1.34043	0.150144	1.25331	6.07717	4.72647	3.07707	1.58686	2.74567	5.86952	3.89894	3.35124	1.46519	4.93472	2.32349	3.60694	4.6016	2.78051	3.67196	5.38704	9.77589	0.332096	1.3614	1.66126	0.604472	-1.70988	-0.545087	5.7466	2.01916	5.07222
800	2.27532	3.4318	1.62849	3.46171	4.72845	2.43044	2.81892	2.44108	1.37367	4.74242	5.43315	4.0363	4.03262	4.46029	4.18651	800	3.22576	0.95102	1.01332	1.65623	5.41878	5.76359	3.68127	2.02505	3.11644	6.04342	3.59432	2.67773	2.28553	5.04712	3.29968	4.50735	5.07962	3.24806	3.32189	6.01412	10.278	3.17522	0.436155	1.47846	-1.10523	-2.18608	0.418754	6.09425	2.80871	5.18385
801	3.11777	2.08891	2.21111	3.46996	4.84948	1.20423	2.92429	3.74716	0.702069	6.6211	4.96051	5.29045	3.04025	6.19412	4.24801	801	3.10466	1.14244	-0.565216	1.00677	5.59783	6.39924	4.43515	0.163165	3.67963	5.84217	2.21425	4.45702	1.73909	4.19824	2.86563	3.08053	5.81066	2.69358	3.65699	5.39593	10.3163	2.9803	-0.407495	1.08895	0.652887	-1.97184	0.36803	4.18493	2.3761	5.15202
802	2.60411	2.38138	2.30022	3.12193	4.16665	1.7339	2.59087	5.26425	-1.17367	5.58206	5.82569	6.3314	0.696707	5.38665	4.99826	802	2.69143	1.53717	-0.0286949	2.1592	5.61215	7.10321	4.53812	3.33033	3.24264	6.23411	2.90872	2.37221	2.33068	4.94555	3.51729	3.69519	5.38085	2.63351	4.56967	4.99014	8.80217	3.79967	0.492268	2.20968	0.0797599	-2.64348	1.31065	5.89966	1.66266	5.01418
803	3.23561	2.95126	1.70687	2.96577	3.65883	3.14912	2.06635	4.48661	1.26155	5.63447	1.30476	4.02882	3.64215	5.39953	3.58591	803	2.24473	1.63726	-2.12915	1.78683	6.30712	4.74733	3.58081	2.33289	1.82365	5.99705	3.13668	1.39439	1.66778	4.79858	2.41636	4.49677	5.53304	2.7881	3.41622	5.35336	9.59292	1.67466	-0.901649	1.49671	0.464266	-2.59979	-1.00275	5.79763	2.45569	5.2038
804	3.55152	3.60124	1.20326	4.41589	4.17644	1.71137	3.51282	3.07158	2.56601	6.03187	5.21172	5.69214	3.5778	5.93046	3.43296	804	3.20804	0.771722	1.01892	1.56569	6.26261	5.04836	4.11945	2.44986	3.80793	5.41564	4.25261	2.89165	2.22284	4.88445	2.5939	2.92357	5.056	3.18384	2.8516	5.45319	9.70103	0.855543	1.45115	2.2404	1.15004	-0.72641	-0.641397	5.96532	3.03994	4.46969
805	2.55083	3.6406	1.21251	3.39494	3.04347	2.30753	2.18849	3.97933	1.5905	5.43703	5.20057	5.50946	1.71296	6.70794	2.64649	805	3.58576	1.5409	-0.148703	1.14474	5.55231	5.19612	5.19913	2.14694	3.74011	6.29569	3.34794	2.20043	1.63202	4.1899	2.6558	3.37181	5.01479	1.73185	3.91872	5.19041	10.0528	3.69869	0.0693833	1.92528	-0.176484	-1.49637	-0.0493303	5.89735	2.305	4.77133
806	2.50323	2.29987	2.22025	3.30275	3.30928	2.31922	3.11047	4.61385	2.23019	4.90389	4.52538	5.3819	3.31942	4.77651	3.95291	806	2.44049	1.7367	-0.357848	2.25292	5.35056	5.53203	3.42385	2.10499	2.9494	5.78131	2.305	2.79283	2.08157	4.28111	2.68726	2.08028	5.1813	3.60961	4.5532	5.95191	9.86092	3.00254	0.430262	3.38244	-0.0558981	-1.95345	0.405631	5.17385	3.17019	5.22045
807	3.84761	2.89062	3.08543	3.91724	3.99898	2.32388	3.77376	4.68147	1.75973	5.4066	5.58087	5.36797	3.43387	6.54865	4.79548	807	3.03868	1.57607	1.84295	1.08148	5.74422	4.77712	4.52155	1.40973	3.13748	5.34739	3.26751	3.0276	2.08463	4.90973	3.35544	2.69037	5.25738	1.32333	3.43771	5.90116	10.9288	4.10246	-0.0837907	2.15351	-0.306104	-2.58947	0.876818	5.25326	2.14609	5.58493
808	3.48364	3.25733	1.85807	3.43675	5.22704	1.70414	-0.318344	5.57384	1.02095	5.24394	6.48022	4.03311	2.86226	6.28383	3.47093	808	3.05757	0.904419	0.337713	1.81194	5.68701	4.10456	3.75993	1.80688	2.59498	5.21873	2.89666	4.00964	1.41233	4.50772	3.23147	3.87969	6.37822	2.71603	2.9104	5.80515	9.22092	4.4906	-0.0843722	1.47597	0.285784	-2.13292	0.189831	6.27196	2.78909	5.46775
809	3.13515	2.34137	2.67748	2.79238	4.00755	1.37136	3.162	4.42528	2.86769	5.1255	4.72761	4.67809	2.60094	6.11506	3.06093	809	4.29534	2.17752	0.534444	1.07777	5.79607	5.59285	3.66723	1.61387	3.00344	5.0806	3.90643	2.4106	1.30349	4.6131	3.17671	3.44604	5.25584	3.05558	4.28626	5.6247	10.0368	3.06431	-0.127006	0.990407	1.39068	-1.21082	-1.30189	5.26647	2.10452	4.61653
810	2.95175	2.1961	2.09891	3.37707	5.15697	1.99701	1.33975	4.99954	2.58806	5.48414	5.69172	4.8199	0.759001	5.85898	4.68435	810	3.79002	0.660083	-0.439433	1.35088	5.54545	5.60997	4.09757	2.01004	2.13369	5.11014	3.81643	3.97975	2.3221	4.60353	3.34597	3.68844	3.80565	2.90079	3.47477	5.7933	10.0725	0.256637	0.574314	2.46464	0.540723	-1.73479	0.463935	6.04809	1.3915	4.91533
811	4.10445	0.731415	1.75805	3.39209	3.72812	2.10128	3.13311	4.55565	2.45292	6.19169	6.43695	5.35676	2.44812	5.01605	5.3982	811	3.18173	0.931901	0.632709	1.10912	5.85795	3.99048	4.13919	2.2049	3.57216	3.71534	3.386	3.36371	-1.15253	4.8277	3.50183	4.48008	5.36409	3.05001	4.32311	5.30876	9.45488	3.65849	-0.27013	1.44517	1.28549	-1.68919	0.374614	5.59377	3.58198	6.35865
812	2.52995	3.32258	1.3988	3.67202	2.67001	2.13021	2.93919	2.37601	2.83938	6.18719	4.7545	5.55535	2.30709	4.94461	4.12198	812	2.3544	1.45579	0.39571	0.430108	5.81764	4.43224	4.15937	3.05995	3.72879	4.70022	3.95034	2.14853	2.74329	5.02722	2.85497	2.77175	4.94019	3.36835	3.6765	5.38592	10.3502	3.27839	0.0534664	2.94623	0.555648	-1.89004	-0.473953	5.51581	2.09846	5.34513
813	2.36844	2.91143	2.01548	3.46136	3.23476	1.79424	2.08977	3.64533	1.76571	5.27514	5.38041	5.24235	3.05527	5.68853	3.75062	813	1.95071	1.13524	0.624883	1.85027	5.98697	4.6265	4.14121	1.50144	2.51524	5.71628	3.82615	3.59337	1.77172	3.94805	3.58513	4.04944	4.36047	3.98144	3.64808	4.491	9.93346	3.36474	0.307477	1.49206	-1.1532	-1.76567	-0.0205665	5.17244	3.49579	4.92942
814	4.31971	1.93707	1.1636	3.96798	5.2725	3.02765	1.5211	5.58839	-0.13147	5.64808	3.41489	1.1269	4.00264	4.91137	4.39599	814	2.9923	1.49592	1.72439	2.07245	5.84303	4.9865	4.0552	1.20352	1.91568	4.59958	3.14389	2.85861	1.93391	4.49168	3.70221	3.60042	4.76694	2.54709	4.61456	6.05518	10.4951	3.41165	0.49985	1.95028	-0.0311752	-1.09968	-0.286136	5.0884	3.84054	5.87886
815	2.59267	1.7032	1.70902	3.52278	3.14073	2.40051	2.00782	1.95528	0.759633	4.49456	4.16077	5.02824	2.91993	6.43497	4.35642	815	3.00977	0.866653	0.881786	1.42206	5.58717	4.23289	5.20185	2.1935	1.9684	5.37508	3.11258	1.23307	1.5247	4.39595	3.67155	3.09263	4.90812	2.72881	4.27104	5.93537	10.5122	3.63918	0.017551	2.68057	-0.652372	-1.66238	-0.259219	5.08926	3.57036	5.73833
816	2.93325	3.69948	1.36585	3.74531	3.41597	3.34369	3.1919	1.6084	2.45467	5.12547	5.0819	5.43432	3.45437	6.50504	2.82941	816	2.63965	0.433864	1.19497	0.504127	5.0878	5.07268	4.78533	1.05038	3.01663	5.51365	2.9635	1.87371	0.345431	4.27043	3.52324	3.34871	3.78619	3.84735	2.93621	6.0336	11.0081	3.00664	-0.18482	2.1407	-0.255433	-0.367332	-1.70919	4.71157	3.41288	4.71538
817	4.07668	1.75099	3.35613	3.28708	3.92112	1.63363	3.02958	4.26725	2.32409	6.50253	5.56603	5.27246	3.56363	5.2088	4.27611	817	3.7396	0.48057	0.969432	1.74683	6.24155	5.01273	4.85346	1.69452	3.48245	6.10845	3.43692	2.41787	1.94915	4.86188	3.39356	4.03017	4.18591	2.21921	3.57068	6.56472	8.98723	1.84571	0.29543	1.81986	-0.816332	-1.05271	-0.6209	5.14174	3.05105	4.5044
818	3.20404	2.26726	2.52536	3.47131	4.07008	2.04961	2.5883	4.38461	1.49926	5.42464	5.63177	4.25928	3.09761	4.56775	3.95551	818	2.45336	1.87292	0.880449	1.96041	5.3764	4.44108	3.90475	2.65287	3.39746	5.14223	3.06087	3.02003	1.59266	4.18505	3.25415	4.05564	4.9647	3.82555	4.30446	5.05313	10.2618	4.33447	0.0200549	2.32433	-0.26723	-2.02192	-0.296573	5.34266	2.86892	4.51735
819	4.80832	1.12382	1.86709	3.47212	4.90767	1.85635	2.07835	2.77723	0.672114	5.78042	5.30742	6.35578	3.23036	5.62345	4.51083	819	3.43597	1.30799	0.322943	0.60442	5.53759	4.95383	3.15269	1.30886	1.99352	6.18359	4.06483	2.03412	1.47669	4.30262	4.19656	2.70343	5.7966	3.29459	3.78978	6.14432	10.46	3.05355	-0.193037	2.42692	0.2991	-1.47251	-0.0715908	5.79812	2.2297	6.24711
820	2.06941	2.41269	1.50952	3.48541	4.14022	3.09845	1.70905	4.79343	1.34386	5.87319	6.42016	4.45965	3.21029	4.91915	4.43229	820	3.5162	0.798084	1.38168	0.557104	6.3983	4.15116	3.99046	1.35657	2.69691	5.68607	3.07877	2.37572	2.25077	5.28581	4.32222	3.10401	4.23852	2.85328	3.5548	5.71512	9.88058	2.40028	-0.685743	2.6821	0.208886	-1.92983	-0.17928	6.13477	2.48466	4.40696
821	3.73947	2.68391	0.974975	2.9732	3.79334	1.41251	3.01454	3.98909	2.00213	5.91273	5.14297	5.33998	2.09988	4.92722	4.45516	821	3.92102	2.19939	0.798265	0.792382	5.46033	5.48714	3.96307	1.09252	3.28976	5.10561	1.92299	2.99904	2.15977	5.11285	2.40091	2.52001	4.22587	3.53573	3.56254	6.76086	8.89789	3.91901	-0.0365615	1.91063	1.15315	-1.29151	-0.544825	4.70682	3.62492	4.60761
822	2.50308	2.03488	1.14383	3.60686	4.74513	2.71426	3.90268	4.75568	1.62636	4.73526	1.82804	4.25813	2.01627	5.77156	3.53634	822	2.15601	1.75859	0.965524	1.00619	5.84008	5.32984	5.0743	2.10789	4.4006	6.12721	2.02615	2.37084	2.42046	4.39193	3.83919	3.2735	3.97507	3.66685	4.04784	6.62393	10.9943	4.39329	-0.728873	2.2696	-0.113832	-1.46434	0.42902	5.58183	1.86299	4.42546
823	3.09086	2.1479	1.72159	3.01446	4.8643	2.76756	3.7561	5.52663	3.29801	5.21962	5.66401	5.07506	2.5276	5.70241	3.59482	823	2.51788	1.22392	1.11682	1.53944	6.11502	5.15506	4.06262	1.39547	3.29951	5.19592	3.33626	2.17608	2.13716	5.08565	2.91874	3.69751	4.786	3.53753	4.18133	5.95677	10.0542	4.52816	-0.851709	2.7501	-0.897014	-1.58332	-0.24535	5.73555	2.73776	4.49225
824	2.42907	2.83578	2.65607	3.44462	2.62433	2.78069	3.19175	4.60193	-0.202248	5.15435	5.36468	5.71578	2.681	5.58885	4.61356	824	1.69598	1.7211	1.97774	0.686906	4.96817	4.94007	3.76832	2.22255	2.77644	4.99093	3.25321	2.12895	1.58975	3.90891	4.39641	2.64528	6.30791	2.54148	3.4255	5.9521	9.20427	2.25016	0.860993	2.78321	0.976811	-1.82857	-0.609108	5.63541	1.34427	4.68422
825	3.31328	2.41736	2.18649	3.28791	2.29991	2.25575	3.54283	4.7557	2.34884	5.33282	4.47789	4.93119	2.92313	5.81272	4.2369	825	3.60045	1.93558	1.05386	1.26735	6.48076	5.76817	4.03068	2.29794	3.80725	5.28566	4.26777	2.24822	2.52082	4.48343	3.91672	3.94451	4.40444	3.01726	3.66522	4.60284	10.9296	4.33341	-0.994205	2.66482	0.00999646	-2.53041	-0.127977	5.81441	3.81879	5.49355
826	2.64157	0.432283	2.78686	3.55666	3.59086	1.93183	3.02165	3.38994	1.1945	5.64278	2.42627	5.17304	3.27659	6.62123	3.68699	826	3.97962	1.20222	1.25354	1.09791	5.73501	5.98838	3.85309	1.54601	3.06866	6.36223	2.92021	3.8339	2.16738	4.32662	3.67507	3.70425	4.11079	3.98001	3.88307	5.66697	10.2187	2.28041	1.14843	2.49705	0.0970346	-1.62665	-1.50307	6.40314	3.07325	5.40272
827	3.47982	0.941667	1.84785	3.01674	4.64915	2.20929	1.73388	4.40717	2.3443	5.91075	2.96576	5.92941	2.25074	5.4914	4.31586	827	3.02791	2.29295	0.897539	1.13048	4.63623	5.30717	4.17502	0.458735	2.00576	5.72892	3.67115	2.75128	1.77559	3.62547	3.50964	3.44797	3.97609	3.20421	2.63196	6.02303	10.5471	3.56886	0.268666	2.2435	0.361729	-1.39655	-0.936498	5.19065	2.28818	5.4277
828	3.40762	1.75591	1.84608	3.71142	3.7953	3.11641	1.35619	4.31458	1.72435	6.11421	4.92714	6.01742	2.66133	2.56696	4.23246	828	2.73398	2.04802	-0.00455126	0.705913	5.65989	5.63566	4.07938	1.42162	2.70414	6.17464	2.58899	1.34377	1.57523	4.26988	3.51707	2.48241	4.48961	4.4472	3.73285	5.56343	9.95759	3.454	-0.586289	2.19992	0.325983	-2.61494	-0.290475	6.33156	3.13195	4.7015
829	2.8101	1.68362	1.61845	2.41153	4.85981	3.18395	2.58575	3.0451	1.98672	5.52253	6.37772	4.7276	3.67566	5.46799	3.6943	829	3.37628	1.75551	0.72185	0.317265	5.41094	6.40588	2.96642	1.86755	3.52896	6.31922	2.15214	3.91054	2.24087	5.12628	3.48061	3.7062	5.31328	4.15151	3.4456	5.26604	11.0224	4.52369	-0.793413	2.04009	-0.300479	-1.26418	-1.2916	5.85827	2.94278	4.7218
830	3.22014	0.92421	0.613547	2.43948	3.87218	2.2589	2.00456	4.24116	2.4349	5.43743	5.38585	5.80162	2.9305	5.0277	4.1908	830	4.20601	1.91279	1.23754	0.322926	5.8756	5.34136	4.62698	1.67334	4.08985	4.97993	2.95139	2.61159	2.16424	4.81379	3.07191	3.53008	3.86388	3.65368	3.76453	5.3973	10.3677	3.32909	0.577631	3.39095	-0.731815	-2.35001	-1.40551	5.73275	1.84365	4.98402
831	3.45462	3.22123	1.79852	3.32203	2.6518	1.85632	3.22954	3.73831	0.266728	4.66744	3.69311	4.01385	2.3113	5.38713	4.22525	831	2.11483	1.05759	0.515083	1.1606	4.91345	5.79559	3.69621	1.85613	3.24144	5.87518	3.64667	2.33278	2.00617	4.74679	4.00309	2.65948	3.52193	3.34789	4.30658	5.95919	9.05861	3.32855	0.421909	1.9984	0.173715	-1.3838	0.0234865	5.63334	2.54864	5.21437
832	4.18601	0.969545	2.58846	2.60626	3.57395	1.98009	0.660546	3.19754	0.841745	6.4139	5.62568	5.76514	1.73113	5.2273	4.72949	832	2.87475	1.83433	0.449622	2.01134	5.33117	5.62712	4.42897	2.23626	2.52379	5.71628	2.82177	3.33566	0.831192	5.29286	3.57233	3.78369	4.88954	3.08225	3.93891	5.5845	9.74527	3.34497	0.685207	1.41602	-0.716871	-1.20626	-0.194618	5.0796	3.61441	4.67726
833	2.84144	2.52696	1.83467	2.7806	3.91963	2.95521	1.82128	3.93755	0.358251	5.57879	5.42007	5.1134	1.96034	5.66461	3.4481	833	3.34511	1.39993	-0.386624	1.23304	5.48911	6.34227	3.23549	1.58808	3.47285	5.27439	2.81874	3.43817	2.37189	4.8775	2.48008	3.35482	5.23985	3.16254	3.94674	4.85394	9.71307	1.57033	-0.103773	1.87373	-0.0723468	-1.58775	-0.376316	5.33053	2.86108	3.55256
834	2.61022	1.71041	0.805821	3.30185	2.793	2.61307	3.50274	3.74787	2.08792	6.05537	4.05175	4.78085	3.58245	5.41136	3.99461	834	2.70481	1.40094	-0.910709	0.45845	4.59097	5.31911	2.78714	2.47844	3.13031	4.46627	3.587	1.24074	1.95905	4.56206	2.77001	3.29998	4.34803	3.10121	4.32769	5.60136	9.73081	3.50574	0.261977	2.23603	-0.232168	-1.42218	-0.951511	5.13278	2.79463	5.17657
835	2.74056	3.00725	1.68985	3.21138	2.24873	2.34661	2.1946	3.93892	2.75687	5.5085	5.18922	5.23726	3.03587	6.13534	3.46492	835	2.84197	1.40506	1.13384	0.274075	4.71784	6.91169	3.94157	1.49592	2.88472	4.13499	4.11869	3.03504	0.988733	4.50425	3.67796	3.00479	4.1389	3.02661	3.41616	6.33958	9.31801	4.09541	0.584239	1.84341	-0.30486	-3.24901	-0.77996	5.36269	2.61173	4.74912
836	2.21583	3.26713	1.70033	3.67451	5.24864	2.57993	2.1618	4.28256	1.72646	5.80083	6.57534	4.10079	2.78017	4.8808	4.08956	836	3.82992	2.40971	1.24921	0.0744026	5.74883	6.93388	3.09916	1.57846	3.33317	4.43815	3.69461	3.15339	1.2549	4.47731	3.38503	2.99246	5.05149	3.61834	3.7	7.0133	9.49504	3.44197	-1.19385	2.0791	-0.946745	-2.19176	0.459345	4.53037	3.18038	5.13707
837	3.24842	3.15511	-0.124217	3.40041	3.76199	1.76372	3.22923	1.58064	3.68193	5.72506	5.76837	6.17305	2.18908	5.89207	3.95799	837	3.48142	1.24053	0.776239	0.75495	5.31652	5.53672	3.05483	1.12566	3.24856	5.67722	3.72604	1.58538	1.61492	5.1656	3.64678	3.18011	3.99496	3.64633	4.18523	6.17404	10.6332	3.12572	-0.909228	3.359	1.1723	-2.88698	0.165279	6.03099	3.39657	4.88559
838	2.83586	1.2091	1.42555	2.49552	3.82715	3.47562	1.54309	3.41465	-0.136728	5.2228	5.57396	5.78431	0.323241	6.30191	3.66694	838	3.79298	1.64615	-0.130135	0.445301	4.82139	5.7647	2.54816	0.538	2.89907	5.16718	3.16815	1.07608	2.7761	4.81592	3.09307	4.47331	5.26124	3.22422	2.86187	5.79582	10.4669	2.95212	-1.05703	2.20028	-0.5625	-2.53687	-0.551879	5.95086	2.61075	4.07454
839	3.61655	1.93293	2.54764	3.4443	3.46723	1.93694	3.63655	4.76712	-0.946646	5.59302	4.84162	4.42144	2.8528	5.85649	4.49981	839	2.73191	0.554131	0.176489	1.67544	5.25175	6.57734	3.85938	2.30981	4.03925	4.41324	2.85143	2.37914	2.13349	5.10616	3.41086	3.7755	4.73946	4.57731	3.63843	5.88993	10.5693	3.64195	-0.872284	2.16813	0.160845	-2.37597	-0.59844	5.39238	1.56451	4.19104
840	3.23318	1.50665	2.09871	2.00812	4.35102	3.23367	1.42228	3.12775	2.45331	6.08655	5.28446	4.65062	3.13197	4.56753	3.66475	840	4.01375	1.01957	1.63325	0.0921867	5.83715	6.93454	4.71046	1.26111	1.37343	5.80118	2.72387	2.27713	-0.81502	5.12085	1.90452	3.61012	3.92592	2.95928	4.34523	4.70841	9.8913	4.45046	-1.55724	2.17349	-0.113737	-1.74669	-1.43423	6.61897	3.8723	4.49801
841	2.45164	2.8045	2.4156	3.76635	3.4976	2.38922	1.86888	3.72576	2.71782	4.95301	1.5209	4.82368	1.15025	4.18892	4.85104	841	3.13863	1.21001	-0.223984	0.488	5.28095	6.58296	4.4121	1.96411	2.61916	4.28445	2.78371	2.28849	0.698241	4.05166	2.27302	2.6849	4.35682	4.42037	3.71386	6.04475	10.2889	3.8053	-0.816699	2.22808	-0.261671	-2.27141	0.332758	5.26169	2.46875	4.20026
842	1.27893	1.97964	1.20725	3.2307	4.24262	3.18117	2.6591	4.17771	0.345211	5.72526	5.55121	4.85174	2.53144	5.55389	4.34728	842	3.37608	1.48157	-0.680821	0.752704	4.95677	7.25078	3.17901	1.99363	3.2374	3.94652	2.51399	2.44282	0.771967	5.54003	3.10235	3.94852	4.28263	3.88831	3.70931	6.30034	9.60408	4.27755	-0.541435	2.55392	0.617465	-1.26925	-1.07542	5.51113	3.31093	5.24415
843	2.78619	0.751368	2.8789	3.82794	4.70368	2.89237	1.9477	3.97145	1.56961	4.69014	4.73444	4.88833	1.73706	6.93367	3.36536	843	2.01847	1.50643	0.77739	0.760543	5.246	5.84825	4.33258	0.731467	2.95807	4.86386	3.35714	1.82028	2.2748	4.21767	3.73073	2.31198	3.34087	4.55145	4.09642	6.74491	9.66829	4.00793	0.12899	2.77384	-0.204539	-0.453931	-1.66492	5.26732	3.20985	4.50816
844	4.06221	1.48346	1.20674	2.33262	2.4279	3.18567	2.87292	3.82398	-1.21924	4.73194	5.49075	5.14625	1.48286	5.91743	4.59148	844	3.95776	0.737459	0.27991	0.431853	5.22902	6.34708	3.98669	1.45698	3.43789	5.47669	1.52595	1.15741	1.78577	5.18728	4.01582	3.28749	4.47333	3.56996	3.20093	7.17284	9.24361	3.10644	-0.773103	2.17267	-0.857134	-2.34097	-1.03079	6.15022	2.1476	5.14943
845	3.75043	2.71704	2.42481	2.68221	4.34837	2.61741	2.73093	3.46223	1.89109	5.75591	5.10016	5.57956	3.31589	5.29419	4.6574	845	3.42403	2.10269	0.0801876	0.390687	4.83947	6.22582	3.94784	1.84974	2.73701	6.37922	2.49507	1.76808	3.14286	4.61435	2.5375	3.86688	4.1925	4.39453	4.36708	6.92274	10.4974	3.25689	1.00944	3.17029	0.272663	-0.947914	-0.21415	6.06778	2.46341	4.89081
846	1.54388	1.5434	2.04491	3.38288	4.2911	2.71384	-0.0827839	4.18333	1.89813	5.41216	4.88137	6.56204	2.47187	6.63396	4.52222	846	2.18221	1.67329	0.86055	0.393711	5.28672	6.88538	2.55523	1.16043	3.24765	6.09368	1.62544	2.97064	1.83463	4.67564	3.12861	3.32181	4.44252	4.58438	4.15318	7.3901	10.2119	3.36252	0.709019	3.0175	-0.805547	-1.31297	-0.204998	5.34748	3.9478	5.12745
847	2.81363	2.23898	1.47904	3.77025	5.71762	3.06189	2.55557	4.01355	1.21404	5.07943	5.04386	5.58139	1.76378	4.95109	3.44993	847	3.7848	1.38777	0.262772	1.10095	4.60593	6.30051	3.62967	2.282	2.06005	5.63334	1.93498	2.61343	1.81544	4.7555	2.88863	3.53333	2.79307	5.4657	3.95866	6.86565	10.5856	4.35228	-0.0988583	2.78462	1.30797	-0.755103	0.263119	6.58095	2.94541	5.65533
848	1.55645	2.78929	1.84848	3.95102	2.81222	2.14019	1.04892	3.05656	1.84867	5.28127	3.77263	2.73862	2.62083	6.708	3.86323	848	3.46966	1.70063	-0.101311	0.287692	4.99771	6.08341	3.87052	2.1217	2.00349	5.10579	2.42362	2.28147	1.93	4.54471	3.62879	3.22522	3.94859	4.12611	3.87713	7.09406	10.211	3.62871	0.187871	2.79109	-0.874603	-2.63975	-0.907271	6.2051	2.87125	5.09929
849	3.07942	1.54372	1.5797	3.93761	3.88366	1.95929	1.20946	2.88758	0.825405	5.55354	4.1707	4.67723	2.84599	6.27171	4.4425	849	4.34341	2.33394	0.164318	-0.386772	4.75722	6.10128	3.07485	2.06048	3.22105	4.04471	2.32496	1.52074	2.15316	4.00164	3.07539	2.13251	3.74253	6.37922	3.4486	7.07393	9.92497	4.44707	-0.317447	3.31593	-0.655994	-1.53596	-0.713326	5.6454	3.05423	5.71014
850	4.24767	2.43828	1.98815	2.89061	3.39732	1.72019	2.70035	3.84487	2.70143	5.39026	3.30423	4.74995	2.65275	5.76361	3.78013	850	3.81683	1.65904	0.749955	-0.0404081	4.89801	5.06743	3.13264	0.829688	2.30346	5.88998	3.33672	3.8103	1.18768	6.00221	3.45006	2.93949	3.50386	5.02898	4.3496	7.53229	9.10865	3.62594	-1.21974	2.21306	1.20922	-1.53315	-1.18611	6.186	3.62593	5.2316
851	3.56201	2.78324	2.08416	3.0493	4.71074	3.69041	2.48587	2.76529	2.51456	4.44991	3.00374	4.83187	2.15052	5.23378	4.46739	851	2.6907	0.179335	1.26752	0.583068	5.5415	5.98459	3.74546	1.22616	2.67817	5.89636	3.11593	2.63793	1.92097	5.29067	3.8164	3.3144	4.50591	5.82764	4.29135	7.17614	10.1069	3.76512	-1.01308	2.84805	-0.0562067	-1.70481	-0.448382	4.73225	2.98313	5.1325
852	3.07546	1.30282	-0.563471	3.00859	4.02512	2.07678	2.62171	2.63435	1.52965	6.15607	4.75916	4.10642	2.62625	3.77583	4.15282	852	3.99985	1.20583	1.26784	0.803921	4.12432	6.50228	3.70764	1.54231	2.84391	4.77435	3.53444	2.70063	1.65043	4.39899	3.51137	2.53535	3.62302	4.71376	4.32217	6.71556	10.3621	4.2661	-0.613774	1.94291	0.198015	-0.875623	-0.205437	6.22945	3.53045	4.82405
853	4.1767	3.20676	2.31717	4.4447	2.31889	2.00762	3.41222	-1.06602	2.09791	5.77462	5.59207	5.30049	2.33731	5.49226	4.54864	853	2.25173	2.96054	0.36749	0.579512	4.33847	6.44644	4.13838	1.82028	2.77981	4.13819	2.26035	2.17922	1.60269	5.09333	3.86004	3.62636	4.18902	4.79888	4.24876	6.52484	10.9712	4.05493	-1.19468	2.56767	-0.655405	-2.25065	-1.23069	6.35689	3.73528	4.16397
854	3.53557	2.26217	1.19155	3.22656	4.765	2.74651	3.25573	2.61103	0.174736	5.39695	3.75542	6.27427	1.84998	6.03131	3.38466	854	2.73867	1.11255	0.143858	1.28079	4.0195	6.11971	3.80656	1.31956	1.79277	5.31012	1.42425	2.63741	1.00159	4.46712	3.77157	3.39512	5.68528	6.48072	4.05075	6.41532	10.2619	5.26783	-0.346088	1.98444	-0.235908	-2.18108	-1.28812	6.41348	2.10726	4.28776
855	3.89086	3.11435	2.18333	3.02116	5.55344	2.75847	3.19962	-2.03896	0.364842	5.14431	4.94659	4.71963	1.43609	4.66453	4.34916	855	4.18636	1.30782	1.08869	0.102651	4.98602	6.37986	4.07259	1.12348	3.4134	4.85583	2.04694	2.27037	1.59877	4.57145	2.50576	3.01533	2.45976	4.51919	2.99815	7.03147	10.1143	5.02392	-1.13524	2.67702	0.213994	-1.41341	-0.924072	4.62698	1.37747	4.84131
856	2.78705	0.111588	1.47893	2.57863	3.27557	3.26286	1.21983	3.98383	2.35939	4.67818	3.39547	5.76356	1.91898	5.67783	4.85044	856	3.17349	1.65814	-0.825542	1.0627	5.22362	5.81417	3.31996	1.30643	4.18715	5.43561	1.84507	2.34057	2.90159	5.10414	3.16146	2.86954	3.02993	4.32018	3.79483	7.18541	10.4706	3.79791	-0.456999	2.93484	-1.4633	-1.58128	-1.16117	6.10172	3.39714	4.7151
857	3.62304	3.16443	2.0753	2.06748	2.95643	3.06685	2.33135	4.66109	1.81519	6.18063	4.93549	5.96304	1.07189	4.97876	4.5534	857	3.92915	1.40986	-0.675744	0.0994847	4.84963	5.53571	3.93675	0.344454	1.73944	4.46436	2.92597	2.6402	2.49683	4.47666	2.88684	2.59294	3.04787	6.86402	3.85103	6.79443	10.1877	2.86624	-0.852954	2.67639	-0.294791	-1.31994	0.418397	5.96192	3.82309	4.83306
858	3.79103	1.22327	1.3287	3.64135	3.23764	3.08168	2.0006	1.19354	-2.51007	5.48128	5.52181	3.8217	2.32446	5.78615	4.43191	858	2.42116	2.13803	0.50184	0.44709	4.91743	6.38248	2.94071	0.853303	2.93406	4.05534	2.45566	2.87917	0.713806	4.65363	2.82786	2.38827	3.87689	4.16737	3.60734	6.50305	9.78697	6.06173	-0.332448	2.86777	0.231093	-1.76699	-1.62757	5.47991	2.59503	4.99012
859	3.04875	0.508465	1.46009	3.78324	4.53404	2.84336	2.2119	3.1682	1.84908	6.19377	5.20115	5.51479	2.20251	5.17907	4.91342	859	3.23989	1.47187	-1.01385	0.0581229	3.98301	6.63702	5.05624	0.653383	3.4495	4.8555	3.50235	2.25809	1.63732	4.63017	2.28782	3.03796	3.5349	4.93879	4.74809	6.05772	9.99032	4.5979	-0.563396	3.45168	-0.837614	-1.58872	-0.189701	6.75601	1.39633	4.84489
860	3.86591	2.86898	1.73713	3.35445	2.59613	3.1213	0.228199	4.11072	2.37722	3.46186	1.60553	4.99786	2.2867	5.40032	4.75595	860	2.11082	1.26344	0.668622	0.111745	4.74468	6.18967	2.35262	0.893549	2.19944	4.68531	2.42319	1.9668	1.57064	4.69481	3.32752	2.77585	2.82542	5.77219	3.60163	6.65961	10.5793	4.56961	-1.15075	2.58488	0.677283	-1.81647	-1.56138	5.24416	2.61644	4.94816
861	4.22534	3.1663	1.8852	2.91689	4.29528	2.80687	1.89821	4.0935	0.609185	4.87447	5.14693	5.30787	3.06485	4.78531	3.58472	861	3.2673	1.20495	0.820132	0.161046	5.19685	6.67657	3.48884	1.92688	3.40202	4.25136	2.76652	3.29075	1.39795	5.25921	3.77657	3.01428	3.79209	3.81337	3.06213	6.72337	10.2312	5.98018	-1.0181	2.92589	-0.888023	-2.48461	-0.0302396	6.31141	3.15447	4.82282
862	4.05306	1.82751	2.0871	3.63606	2.96243	1.08935	3.92379	4.4462	-0.163947	5.89879	5.56569	3.73131	2.73997	5.97633	4.81607	862	3.59236	2.01502	0.967844	1.04697	5.36084	5.5047	2.30181	1.10523	4.65525	4.78502	3.38001	1.6358	2.08689	5.08124	2.30039	2.47943	4.38342	5.43403	3.93597	6.66414	9.49058	4.76429	-0.188714	3.30154	0.0209385	-0.555104	-1.55678	6.19623	3.25509	4.63977
863	4.91825	-1.88021	1.66743	3.90137	5.47543	3.17937	2.59048	2.59343	-0.162258	4.67742	3.95333	5.96168	2.98618	6.17909	3.93188	863	2.8031	2.35562	1.27306	1.26698	4.50595	5.97107	2.89547	1.36534	3.15786	4.98282	2.81092	1.03288	0.353189	4.39729	4.14663	2.46122	3.65949	5.24749	4.13811	7.59854	9.86119	5.12282	-0.688117	2.78936	-0.555279	-3.23188	-0.636116	6.07938	2.3385	4.67638
864	4.22597	0.712564	2.2037	3.20471	4.88426	1.85609	1.80636	4.0728	1.88375	6.19607	4.4228	2.9361	1.82884	6.40108	3.34959	864	2.87583	1.94115	1.24066	0.216311	5.31431	6.26994	2.86216	1.76147	3.88907	4.99996	2.50063	1.45309	1.22313	4.35144	3.58006	3.02618	2.86743	4.57292	3.79277	6.94783	9.9723	4.35861	0.0222521	2.88231	0.891904	-2.14959	-0.658411	5.41633	3.55696	4.29048
865	2.91099	2.13158	2.40064	3.73172	4.53989	3.62883	1.61085	3.87516	1.14268	5.88718	5.57861	5.37373	1.25299	5.65091	3.24506	865	3.41013	2.27568	1.04613	-0.341089	5.38483	5.62857	1.3482	1.13127	2.81092	6.06479	2.50247	2.13297	-0.221908	5.17556	3.74536	2.55179	2.61991	4.71957	3.15127	6.72502	9.67629	4.29377	0.201057	3.52885	0.0954871	-0.997274	-0.955919	5.68656	3.53707	4.75449
866	3.85068	1.0466	0.587024	4.13757	4.09707	2.73005	0.584699	2.74956	0.682438	6.45889	4.67804	4.5807	2.34192	5.06805	3.72418	866	3.99858	1.59734	1.10187	0.143861	4.56526	5.56421	1.76175	1.00791	2.4175	5.25162	2.84986	2.90676	1.33935	5.04183	3.59946	3.59873	4.60208	3.37605	3.32892	7.34094	10.8014	4.75081	-0.470063	2.36255	-0.199318	-1.74919	-0.598346	6.23035	3.15363	4.72463
867	4.22048	1.29072	2.01058	3.22868	4.97616	1.75545	1.53588	2.97161	1.18608	5.6856	5.9181	5.27975	1.85311	4.89216	4.30321	867	3.89896	2.44125	0.59114	0.591425	3.82765	6.05101	2.59738	1.68195	2.58511	5.08071	2.88131	1.79244	0.868321	4.6744	2.60179	2.70142	2.82172	3.86755	4.36839	6.53872	10.5504	4.11178	-0.19046	4.3361	-0.226452	-1.63394	-0.619448	5.59612	3.07895	5.18969
868	3.32131	1.95596	1.86294	3.71827	3.86439	2.0177	2.41731	1.50018	-0.255588	5.51514	4.15153	5.58696	2.40235	5.9423	4.49798	868	3.3342	0.557288	0.592649	0.904009	4.40938	5.68397	2.86288	1.56432	2.90528	6.56576	1.90073	2.85253	1.95665	5.38093	3.37881	3.96311	4.37577	4.11799	3.95467	7.3207	10.9066	3.89628	0.140798	3.68679	0.0207486	-2.22254	-1.35164	5.76452	2.78987	4.45304
869	5.06862	1.44329	1.66627	2.64428	5.32632	1.8171	0.800139	3.24497	0.697278	5.60318	5.02554	5.80349	0.611437	5.55928	3.50382	869	2.70913	0.69243	1.01693	-0.200922	5.44776	5.57528	2.17751	2.44511	2.31505	5.07916	3.8955	3.01189	2.01315	5.03487	2.57365	2.78646	5.41093	5.16416	2.21617	7.34155	10.9407	3.1341	-0.827726	3.64586	-0.736628	-1.24015	-0.30208	6.916	2.9372	4.02769
870	3.94599	1.62674	1.79298	3.4953	3.46169	1.88746	1.38376	2.50502	-1.36689	5.04619	1.29592	4.63693	3.04692	5.45035	4.32639	870	3.38164	1.58937	0.00456714	0.240548	5.67222	5.51057	1.68107	1.30882	3.49444	5.05599	1.72263	3.23023	1.7977	4.56932	3.09546	3.60505	4.46524	4.89869	3.50863	6.63674	10.4658	4.76366	-1.83319	2.74171	0.182217	-2.36119	-2.2174	5.53605	2.63598	5.73438
871	3.39889	2.23002	1.84136	3.69688	3.47952	1.82154	1.72751	2.42086	-4.38333	5.23068	4.75829	4.57623	2.31905	6.13991	3.99419	871	3.35122	2.60291	1.66603	0.417387	5.77566	6.32758	2.65724	1.42419	2.2884	4.95558	2.58036	1.72476	1.73688	6.45004	3.15591	3.12712	5.41834	4.78507	2.39308	7.6648	9.69737	5.55738	-0.475838	3.32222	-0.103758	-1.16666	-0.153211	6.29004	1.88693	5.25422
872	3.83903	0.920292	1.40833	3.10384	4.53704	2.32479	1.77713	3.42601	1.97675	6.03175	4.37616	5.49896	2.65211	4.72774	4.43942	872	2.22293	1.02465	0.183044	-0.866492	4.99359	5.5438	2.84354	1.45588	3.50772	4.47269	2.13259	1.424	1.86393	5.12905	2.82908	2.30855	4.40778	5.94883	3.08512	6.01313	8.52543	5.71336	-0.906692	1.96428	0.194384	-1.07437	-0.174816	6.01982	3.85799	4.35007
873	2.72856	1.09933	1.38858	2.64767	3.98573	2.2433	2.2726	2.39078	3.15576	5.22855	4.95859	4.58052	3.54214	5.83529	3.49506	873	3.36155	1.65223	-0.120916	0.637541	5.17226	6.77386	3.09096	1.00099	4.03842	5.63264	1.85233	1.80526	-0.501319	4.78308	2.32634	2.38154	4.78501	5.23793	2.69944	7.52455	10.8932	5.67031	-1.05748	3.41978	0.19229	-2.20108	-0.200451	5.44031	3.87158	4.73751
874	4.134	1.0261	1.97844	2.46204	3.05246	2.03899	0.530266	3.32691	1.72523	5.29357	0.684867	4.42201	2.19482	5.90305	3.96675	874	3.90235	1.37275	-0.476727	-0.722481	4.6119	5.84634	2.97528	1.53002	3.85661	4.96149	1.39256	1.24502	1.23161	4.29639	2.96924	3.64062	4.01491	4.12457	3.51409	6.64331	9.6943	4.77517	-0.48737	3.6059	-0.642854	-1.92184	-0.621464	6.31586	2.81873	4.59356
875	4.1908	2.48786	3.04657	2.97051	5.7954	2.25488	2.64372	0.718385	2.06124	6.56906	2.39692	5.26664	4.03044	5.56976	3.30159	875	3.14014	1.77222	0.354366	-1.02189	5.49676	5.85429	3.44749	2.22314	2.73646	5.1271	2.87411	2.00745	1.48915	5.02727	1.28362	2.67282	3.91032	5.13726	2.50621	7.2815	9.92403	3.59485	-0.901145	3.20723	-0.379285	-1.56953	-1.05137	5.40378	3.30895	4.98823
876	2.11313	2.86835	0.0215869	3.50558	4.34577	2.33669	1.79608	3.12634	1.61538	5.3275	5.62381	5.2915	3.64027	5.8034	3.76495	876	1.78663	0.680555	0.418111	-0.9018	4.55657	6.0215	2.98653	1.48603	3.61427	5.40673	1.71279	1.98978	0.559315	5.7005	0.665137	3.77809	4.90738	4.62648	3.10918	6.82181	10.7268	6.78378	-0.276914	3.85289	-0.179627	-1.89683	-0.508717	6.37916	2.31397	4.55257
877	4.07355	1.67272	0.772748	2.93814	3.41667	2.43142	2.08945	4.29258	0.783061	4.54666	5.3836	6.22915	2.01021	5.84573	3.61357	877	3.82329	1.53852	0.851316	0.595405	5.13963	6.53703	4.2093	1.66171	3.95591	5.72364	2.68665	1.32716	2.30043	4.67979	2.99873	2.41874	3.28889	3.46615	3.40694	6.23479	10.3459	5.58015	0.434113	3.17834	-0.182954	-1.19625	-0.838596	5.73279	2.90875	5.674
878	3.2272	2.04274	2.42446	3.39023	3.68716	2.23412	2.21066	4.6217	0.635286	5.14851	6.51732	4.34686	3.54651	4.04312	4.54024	878	3.10165	2.144	0.308858	-0.808614	5.75827	7.13565	2.24108	1.18202	3.54321	5.06143	3.4305	2.82793	1.26038	5.28412	2.54821	2.86689	3.83594	3.23429	3.18214	7.1761	10.3564	4.04894	0.164043	4.20575	-0.179157	-3.29952	-0.918615	5.48086	3.16546	4.6477
879	4.12331	1.96258	1.57375	2.71419	4.78289	1.63862	2.95546	2.07272	0.491659	5.58385	5.63779	5.24617	3.56143	4.96093	4.45661	879	3.25403	1.40102	0.888249	-0.989513	5.56723	5.39515	3.23389	1.14972	3.04812	4.84897	3.79283	1.04929	-0.915317	3.84393	2.64924	3.77747	3.80803	4.06489	3.44838	6.62319	10.2317	4.91092	0.274479	3.55997	0.0873221	-2.00443	0.0634055	5.98259	3.00806	5.40576
880	3.69884	2.53045	-0.096923	3.21672	5.36588	1.63085	2.04236	2.454	1.27722	6.24735	4.33146	4.71357	2.32469	5.61083	3.53656	880	3.57076	1.17359	0.953154	-1.70574	4.87161	6.99926	2.60506	2.14679	3.36176	5.67691	2.20357	2.68642	1.21034	4.78115	2.5297	3.82626	4.88706	3.81234	2.5143	6.30317	10.2556	5.05116	0.330907	4.39558	0.124297	-1.95261	-0.633531	4.70635	3.67077	5.01215
881	3.65018	1.26605	1.37895	2.4924	4.02647	2.17641	3.1279	2.38539	1.78115	6.13051	3.90303	5.23206	2.97926	4.95825	3.77402	881	2.63299	1.67061	0.434433	-1.23918	5.14336	5.83571	2.02186	-0.148917	2.78729	5.21541	1.8314	3.14804	1.34147	4.32091	1.75699	4.06027	4.67578	4.19834	3.44407	7.42509	9.66958	4.0348	-0.154717	3.51097	-0.606092	-1.89544	-0.212488	6.58158	2.51429	4.21676
882	3.45935	2.58663	1.7331	2.80142	4.50314	2.91302	2.14469	2.73216	-2.89463	6.07809	5.64301	5.56677	2.78063	5.2953	3.40969	882	2.80298	0.797826	0.687807	-0.0832178	5.48007	6.01118	2.29529	0.337978	2.40871	4.23732	2.98578	1.92572	1.67995	4.21822	0.804351	4.36017	4.46683	3.82823	3.65587	7.44663	9.86551	5.42447	-0.0223532	2.70164	0.747255	-1.52765	-0.752957	5.80416	2.89145	5.65256
883	2.06158	0.0187435	2.32428	3.29351	4.55139	0.584217	2.3836	2.58499	1.41776	5.61392	6.2614	4.56731	2.54556	6.36032	3.99311	883	3.68915	1.27848	2.22063	-0.94185	4.49549	6.05376	2.74625	0.868032	3.34213	5.42718	2.11608	0.293939	1.11422	4.6617	2.6866	3.22163	5.82333	4.52488	3.7246	7.09947	9.74575	4.94756	-0.336617	3.61987	0.542266	-2.44368	-0.939052	5.12787	3.36516	5.25025
884	3.73488	-0.734009	0.513378	4.04689	3.24113	1.56071	1.31339	2.07624	2.2757	5.90568	-0.371179	3.96658	1.71886	5.4095	3.28951	884	4.19222	0.949211	1.21036	-0.349197	4.89104	5.08855	2.36585	-0.602357	4.22708	4.96059	2.22796	2.09238	2.53916	4.72608	2.01452	2.62945	3.45998	4.85184	3.79182	7.24152	10.1006	6.79137	0.00251034	3.49288	-0.569222	-1.70436	-1.14898	6.24175	3.09086	5.61625
885	3.57672	1.64016	0.951235	3.1517	4.32092	2.55752	-1.01904	3.31091	1.70003	5.50922	5.33356	5.92018	2.87312	5.78496	5.09671	885	3.14811	1.7056	1.41643	-1.30296	4.72065	6.58275	1.24349	1.70625	4.63044	5.53941	3.40721	0.979229	1.36683	4.36445	1.239	3.46823	5.47496	5.07126	3.49675	6.37148	10.4223	2.4859	-2.12236	4.2957	-0.161564	-1.50675	-0.333249	6.05315	3.45395	5.20777
886	5.04033	0.762271	1.11775	2.57043	4.13245	1.92082	-1.21332	2.82162	1.00764	6.61563	4.38769	5.93921	3.55712	3.97828	4.50828	886	3.65045	0.704216	-0.0226734	-0.702402	5.28667	6.12006	3.66035	-1.38802	3.38963	5.27864	1.93787	2.20661	-1.62858	3.79053	2.94145	3.87442	3.82102	4.5064	2.88222	7.05824	10.2333	6.06801	-0.344159	3.16348	-0.00674659	-2.04121	-1.45849	5.49156	3.09514	5.96572
887	3.78137	0.471707	1.99326	3.28591	3.76651	2.25876	3.17893	1.53158	1.85199	7.05428	5.08805	3.79479	1.63925	3.43878	3.43315	887	5.14049	0.41738	1.39024	-0.783037	4.98321	6.74499	3.26593	1.42808	4.49872	4.60863	4.08821	1.7004	0.553386	4.50456	2.28929	3.11026	4.84082	4.19115	2.9506	6.98566	9.89527	5.90012	-0.462544	4.33284	0.329629	-0.905507	-0.729225	6.12812	1.89182	5.68978
888	4.64761	0.677576	1.83583	2.87808	4.53236	3.13257	2.13652	3.84018	1.5914	5.77811	3.56494	5.15167	2.33422	4.83103	3.9066	888	3.70551	0.705744	0.112404	-1.58878	4.88078	5.78476	2.50263	0.322331	4.32927	4.47123	3.17085	2.0917	-0.280481	5.4777	2.84708	2.94121	4.50517	4.95817	2.28827	7.54118	10.2532	6.0653	-0.452848	3.2276	-0.257944	-2.59609	-1.12075	5.53169	3.2815	5.60053
889	4.40445	2.48977	1.52378	2.84419	4.29375	1.94684	1.8376	3.60944	1.31232	5.67727	3.60404	5.6793	3.13345	3.61494	3.89947	889	4.20944	1.46259	0.52106	-0.970656	5.56117	5.38915	3.19027	0.57902	3.108	5.72898	2.72991	2.02644	2.00613	4.63511	1.38059	3.80009	3.40589	3.79294	3.15125	6.99935	10.075	5.43443	-0.138641	3.98903	-0.175843	-1.58507	-0.381901	6.2319	1.62967	4.88005
890	3.11658	2.69321	3.33354	4.0176	3.89836	2.25544	1.84941	3.30147	2.33241	6.36307	5.92284	5.07186	1.14237	4.55466	3.752	890	3.91254	0.844154	0.897861	-1.44501	5.02501	6.04596	2.70204	-1.4959	3.09824	4.8874	2.62743	1.23515	2.06921	4.62196	2.94121	4.02799	4.86972	4.18674	3.13447	7.85303	9.99088	4.43117	-0.743152	3.5203	-0.324508	-1.92672	-0.981151	5.12352	2.74027	5.78455
891	3.48374	2.0763	1.48406	2.33165	4.73934	1.86418	2.6464	1.64689	0.152559	4.88286	5.46252	3.27213	2.41619	4.85354	3.72673	891	2.43746	0.480342	-0.614271	0.0449632	4.59491	6.3107	1.67365	-1.31424	2.96022	4.46234	3.01785	1.07116	1.32696	4.5426	1.44834	3.15603	4.8421	4.15772	2.57798	7.64367	10.101	5.0396	-0.132183	3.29811	0.405193	-2.27853	-0.0857357	6.04338	1.33236	6.15833
892	3.28446	1.72601	2.96636	2.61375	4.22281	1.90479	1.67049	3.08724	0.196948	6.93535	0.774774	5.92351	0.851796	2.43888	4.11739	892	4.1468	0.916671	0.741909	-1.26988	5.13676	6.39939	1.18312	-0.237393	3.0613	4.60419	1.32466	3.14704	0.238056	5.24419	1.36258	3.27324	3.46144	3.47985	1.99946	7.31973	10.135	4.13363	-0.550156	2.77472	-0.0406172	-1.93469	-0.207199	5.40922	2.31786	6.33305
893	3.15879	2.76887	0.603909	2.67509	4.70799	2.39798	2.3607	2.39937	1.8408	6.20877	7.08334	4.51044	1.4764	5.0854	4.04572	893	4.19861	2.3051	2.01912	-0.809014	5.32623	5.87641	2.07261	-0.361804	3.76051	5.34699	2.24637	0.90022	1.94994	5.31353	1.32541	3.15745	4.24728	4.75322	1.89255	7.98042	10.7373	5.75932	-0.402376	3.4963	0.0465587	-1.13004	-0.501459	4.93413	3.63505	5.35366
894	4.28017	1.62569	0.366863	3.6769	-0.251381	2.53882	1.56061	2.82016	2.05448	5.94323	5.06464	4.92454	1.23016	4.83987	3.7247	894	2.46762	1.41572	2.03448	-0.0969346	3.8521	5.34322	2.7395	0.22164	2.02709	4.79642	3.21945	2.23102	0.112163	5.97809	1.50749	3.44309	3.22126	3.45335	3.33933	6.7992	9.55503	3.90682	1.03345	1.32447	-0.882426	-1.20444	-2.09434	5.64346	3.61067	5.35024
895	3.61403	1.73821	1.23713	2.44664	4.37968	2.42431	0.298854	2.70937	-0.367743	6.37568	5.59989	4.4735	3.0807	4.24346	4.28883	895	0.444608	1.3442	0.910535	-0.593983	4.72972	5.8538	1.95193	-0.854392	3.5017	5.07584	2.46548	2.08408	1.3189	4.17359	1.4931	3.518	3.85572	3.72881	3.45352	7.52302	9.16646	5.88	0.568018	2.24137	0.584178	-1.67127	-0.612562	4.73967	2.94291	5.97403
896	2.98703	-0.00139278	1.7551	3.03054	5.59011	2.53942	-0.586292	1.82994	-0.120568	5.18402	0.984499	3.82326	2.03391	5.22502	3.53627	896	4.14123	1.28962	0.962197	-0.752791	4.85194	5.62025	3.34337	-0.140007	3.32549	4.34142	2.87913	4.09048	2.3596	5.70369	1.59554	3.05008	3.60462	4.31065	4.07586	7.77313	10.5147	6.3279	-0.143468	3.40537	-0.12936	-1.17767	-1.88475	4.90601	3.58874	5.144
897	3.84267	1.05775	1.35803	3.39242	2.96166	2.01411	2.61262	3.92956	2.20189	6.04864	3.46199	2.82771	1.27536	5.08527	3.4638	897	4.07604	1.38683	1.36375	-0.925989	5.436	5.37965	2.02014	0.334908	4.6458	5.42912	2.32725	0.647391	0.0491034	4.59174	1.94814	3.59092	1.70482	3.55044	1.58505	7.4676	10.2292	5.72107	-0.687165	3.70797	-0.218135	-1.98938	-0.475891	5.94224	2.49813	5.34404
898	2.64831	0.84482	2.2994	2.88611	4.01468	1.78472	-0.174482	4.28452	0.411609	6.11791	4.03184	5.52642	2.8943	3.44729	3.97176	898	3.36203	1.33383	0.860894	-0.706799	5.77556	5.62064	1.34041	-0.742537	4.05331	4.74883	3.91683	1.88117	1.28504	5.31857	2.13196	3.48848	3.3637	3.63576	2.87885	8.36782	10.7328	5.27414	0.140275	3.88502	0.835931	-1.40931	-0.855318	6.64927	3.45265	5.73044
899	2.89808	2.50634	2.0112	3.55832	4.93787	2.3417	2.45743	2.88883	0.0474515	6.07982	4.41661	5.18688	0.00962885	5.85725	3.65615	899	3.05188	0.752263	1.08393	-2.25388	4.7543	5.30496	2.55443	-0.369113	4.35605	4.60762	2.9517	1.18524	0.089506	4.67013	2.1475	2.34862	3.29785	3.71293	1.82631	7.64109	10.1139	4.74963	-0.703096	3.51178	0.277714	-1.5987	-1.95633	5.88534	3.47374	7.26996
900	1.69833	1.91096	1.15662	4.02589	5.42071	2.93928	2.08878	1.65292	-0.719265	5.43877	3.71568	6.17803	2.78922	5.79487	3.21797	900	3.63988	1.01844	1.10854	-1.81788	5.63802	5.3652	2.21507	-0.467212	3.74751	5.50826	3.05232	2.43456	2.32236	5.40033	2.14709	3.28042	3.42743	3.03562	2.82345	7.29465	10.0335	4.33782	-0.205182	3.80062	0.0595135	-2.67458	-1.23824	5.08658	1.8299	6.41129

## Sheet: Fig 6F
Source Data	Figure 6F	ASH VGLUT-pH data: individual dF/F(%) traces
		Three trials per animal: Read from left to right; Trial 1 signifies a new animal
		Acquisition Rate: 5 Frames/sec
																							Responders (Red trace): [4,7,8,9,10,16,18,19,20]
		Stimulus On:	Frame 150																				Non-responders (Gray trace): [1,2,3,5,6,11,12,13,14,15,17,21,22,23]
		Stimulus OFF:	Frame 200
																							1	2	3	4	5	6	7	8	9	10	11	12	13	14	15	16	17	18	19	20	21	22	23
	wt VGLUT-pH																						unc-11(e47) VGLUT-pH
Frame / Trial #	1	2	3	1	2	3	1	2	3	1	2	3	1	2	3	1	2	3	1	2	3	Frame / Trial #	1	2	3	1	2	3	1	2	3	1	2	3	1	2	3	1	2	3	2	3	1	2	3
1	0.535246	-1.15794	-1.13333	-0.0551015	-1.50347	1.8972	-0.565832	-0.0526465	-1.6449	-1.27609	-0.900273	-0.67055	-0.190891	0.413911	0.587551	-0.555415	-0.225734	-0.421103	0.33417	-0.537593	-1.08887	1	0.278788	0.0367535	0.199046	0.158924	-0.377864	-0.132702	-1.46965	1.22718	-0.500599	-1.00332	1.13325	-1.15405	0.173691	0.931008	-2.1989	0.278995	0.950078	1.46387	-0.378919	0.68816	1.7672	1.28069	-0.137533
2	0.777293	0.768669	-0.175018	-1.39439	-0.0572842	3.39895	0.100118	0.152276	-0.694424	-0.902307	0.0132826	-0.405274	-0.369608	0.542504	-0.200724	0.785365	0.325115	-2.62133	0.719029	0.938237	0.536122	2	0.202195	-0.187751	0.513721	-0.0956784	0.254804	0.176261	-0.484697	-0.113486	1.29965	-3.33575	0.607584	-2.69448	-0.983291	0.562435	-0.204949	1.08076	1.47831	0.282776	-1.15146	0.205694	2.25911	2.28315	0.530176
3	1.47193	-0.942713	-0.892293	-1.94661	-0.553107	2.44837	0.240497	-0.195444	0.539558	1.56983	1.14111	-0.188763	-0.687906	-1.05718	0.651349	-0.438208	0.717879	-0.10252	2.47876	-1.06008	-0.464574	3	0.475071	0.760057	-0.195004	2.30692	-0.0282914	0.100207	-1.42656	1.57375	-0.00626497	0.150907	1.93353	-5.48571	-0.406732	2.11362	-0.923113	1.82045	0.394295	0.682213	-0.983616	0.85915	-0.0536509	1.25657	0.647885
4	0.956008	0.180846	-1.56369	-1.92827	0.26821	2.10537	-0.563532	-0.297001	0.910118	-1.2457	0.415635	0.0938991	0.610159	-0.814744	-0.382364	0.175791	-0.183787	0.0112807	0.876646	-0.413187	-0.0640454	4	1.22943	-0.628637	1.19072	1.05878	0.619284	0.0685432	-0.863257	-1.18123	0.870526	-1.17175	0.782729	-3.38254	-1.68089	1.2873	-1.52284	1.49554	0.2542	0.0152263	0.392191	0.626856	0.34862	3.11621	0.427872
5	1.42615	-1.37402	-0.772074	-0.741699	-0.43021	1.67396	-0.552624	-1.11327	-0.0302081	-0.29135	0.392263	-1.4917	-0.689735	1.24774	0.351089	-0.619568	0.65064	-2.64388	1.91462	-1.32494	1.83826	5	-0.0789194	-0.431362	0.197103	1.12864	-1.35964	-0.187337	-0.743635	1.10299	0.866893	-1.83101	1.71715	-2.17107	0.851547	1.56281	0.170318	0.93287	1.4865	2.30858	1.23846	0.525547	1.69838	1.31699	1.42653
6	0.441214	-0.470797	-0.0809553	-1.87446	1.2507	2.30286	0.867173	-0.224908	-0.878437	1.50378	1.56998	0.0523513	0.249225	-1.78651	-0.37841	-0.158699	-0.559923	1.38876	-0.229799	-0.107666	0.146895	6	0.466813	-0.532425	0.379539	2.98124	-0.884343	-0.230751	-0.9449	0.609025	-0.663245	-2.43209	1.37385	-3.9248	-0.179845	1.32878	-1.63839	1.90898	0.906499	1.4581	-2.17271	2.27297	2.52165	2.9742	1.35442
7	-0.295906	0.297001	-1.10905	-1.07993	1.50255	1.26556	-1.69096	0.0536963	0.498283	0.961155	-0.263573	-0.370568	-0.497637	1.07288	-0.0686354	-0.221668	0.205589	-1.05666	0.0194196	0.516098	-0.794393	7	-0.046912	-0.691996	-1.02593	1.41745	0.503488	0.206764	1.06632	-1.48911	-0.627525	-3.40052	1.08092	-4.28501	0.552317	0.775227	-1.23415	2.05124	1.56937	1.03267	0.883168	0.323846	1.51579	2.30757	0.391374
8	0.51371	-1.07974	-0.658065	-0.25555	1.88114	3.38957	-1.37273	0.021542	-0.483744	-0.327666	1.03772	-1.84783	-1.03996	0.0317412	-1.17182	0.168273	0.103059	-0.115052	2.85403	-2.22189	0.475526	8	-0.788816	0.456532	-0.778517	0.708657	-0.57303	0.106025	0.193336	0.0603478	-0.638975	-3.32042	-1.76792	-4.21641	0.10955	0.923484	-0.523863	1.24533	0.0275317	1.70996	1.11224	0.75497	1.64313	2.94376	-0.180261
9	-1.64376	-0.758963	-0.276679	-1.10389	0.912811	2.6504	-0.141564	-2.79641	0.0916461	-0.0259538	0.298294	-1.60795	-0.516828	-0.254253	-0.694405	0.2046	-1.51494	-1.12926	-0.680838	-0.724213	0.125021	9	0.470226	-1.24107	-0.647709	1.37673	-2.02932	0.367952	0.172645	0.643294	-0.445521	-2.00217	-1.78724	-3.40274	-0.0734755	1.62128	-1.22524	1.53576	0.99828	1.93838	0.858236	1.02622	-0.202367	1.40666	2.50438
10	1.01447	-0.209629	-0.511121	-0.827222	1.31685	2.91063	1.81607	-0.199237	-0.434514	1.71348	0.113281	0.293653	-0.311902	-0.203398	-0.697453	-0.622358	0.388294	-2.86668	-2.14993	0.00246719	0.160261	10	-0.0719032	0.255671	0.22103	1.34032	0.191122	-0.602917	0.667391	-0.166316	-1.33262	-3.40411	1.39482	-2.97987	0.275224	0.878202	-3.03867	0.254598	0.304993	2.62081	-3.57974	1.95315	-0.221275	2.2052	1.61861
11	1.16057	-0.349318	-0.894928	0.231027	-2.12887	2.72549	-0.680364	-0.183645	-0.639883	1.28011	0.896323	-0.952237	-1.02743	-2.3665	-1.51634	-0.457275	0.312483	-1.99101	-0.949194	-0.424349	-1.89854	11	0.263259	0.241165	0.44498	1.51709	-0.927635	-0.708739	1.38043	-0.417095	-0.602042	-2.1809	0.289457	-3.08435	-2.12318	0.135927	-2.52669	1.24014	0.438	1.31712	-0.472684	0.730635	2.28665	2.21277	0.874957
12	1.25544	-0.393301	-0.844108	-1.01891	-3.68328	-1.7353	-2.078	1.78553	-0.891412	0.713669	-1.07209	0.0953893	0.0905492	-1.57488	-1.19091	0.334385	0.353095	-2.30592	-0.645365	-2.05374	0.321866	12	1.00333	-0.676553	-0.324293	0.957833	-0.829073	0.0409901	-0.294742	-0.154068	0.243374	-2.36827	-0.400758	-2.134	-0.998211	1.09008	-1.39342	1.79697	0.38851	1.63188	-0.543375	1.42235	-0.18982	2.11648	1.89333
13	1.89369	-0.848942	-2.24031	-1.11593	-2.12662	1.56657	0.135799	0.0395819	-1.37921	1.06196	-1.11783	1.52801	-1.61113	-0.275129	-2.09385	0.469007	0.33296	-0.120817	-0.408826	-0.606932	-0.417219	13	-0.0252766	-0.0455635	-0.165998	2.23591	1.01113	1.45321	-2.41824	-0.099909	-1.69159	-2.54946	0.084858	-3.00646	-1.24292	-0.286015	-1.96408	1.1214	1.02067	1.30321	-0.232827	0.751402	1.74505	2.37955	0.344198
14	0.188042	1.44913	-2.26058	-1.04995	1.69687	1.38767	-0.380901	0.724304	1.09727	-1.01883	0.965453	-0.154019	0.864186	1.03073	-1.13974	-0.852632	0.702016	0.0191991	1.32707	1.46706	-0.712923	14	0.623179	-0.232927	0.227709	2.18704	-0.57309	0.0535256	1.58124	0.814628	-0.924341	-2.17009	1.2129	-0.50304	-1.37292	0.699619	-1.03092	0.31502	0.973592	1.11633	0.994559	1.75385	0.939145	2.36772	1.43094
15	1.90001	-0.469448	0.403888	-2.21405	1.34383	-1.27939	0.513916	-1.49271	-0.887154	0.420241	1.805	0.508168	0.433374	-1.62721	-2.08907	0.0607426	0.385845	-0.233856	-1.25269	0.167873	1.50183	15	-0.457823	-1.32294	-0.391606	2.283	0.554798	-0.126836	-1.44469	0.318238	-0.75335	-1.16883	0.444186	-4.76785	0.137918	1.56179	-2.60381	1.20914	1.91697	1.0931	2.05674	2.07138	0.406311	1.45818	0.307143
16	1.80967	-0.349919	-0.0525652	-0.830375	0.843619	2.96653	-0.0130128	-0.806375	-0.811124	0.675774	0.344108	-0.355751	0.352087	0.571875	-1.86906	0.588188	0.617642	-0.248727	1.71656	0.215409	0.813873	16	0.692537	0.288998	-0.704372	2.77654	-0.17509	-0.259282	0.914422	0.4814	-0.655895	-3.57562	1.6913	-1.67219	-1.74527	0.728137	-0.654168	1.7602	-0.59016	0.575378	-2.60671	-1.5852	1.66737	2.13026	0.619368
17	1.43629	0.0116234	-3.50143	-0.636831	-4.14569	2.01259	-2.42418	0.0695087	1.28364	0.548332	2.42825	-1.44509	-0.335716	-0.714687	-0.383485	0.274639	1.23278	0.739849	-0.679038	0.256958	2.95727	17	-0.525838	-0.570124	-0.744067	1.06704	-0.242078	0.606429	0.236982	0.0128508	0.863879	-3.18427	1.67731	-1.50826	-1.71502	2.4581	-0.224372	0.283661	0.95641	0.526733	-2.01561	2.54526	2.37399	4.5144	1.05728
18	0.403539	0.0818413	-0.58932	0.421875	-1.86481	-2.10817	0.831646	-0.211653	0.712995	-0.630358	-3.00623	0.322239	0.553985	-0.722457	-0.987329	0.469292	1.19435	0.711721	0.0886694	-0.875534	0.0121068	18	-0.303818	-1.75683	-0.654226	0.554656	0.377988	-1.36402	-0.492415	-0.0813527	-0.688027	-2.1586	-0.249305	-4.13883	-0.895655	1.41151	-0.881391	0.71208	-0.077895	1.2938	-2.93112	0.662119	0.847753	1.85517	0.42987
19	1.20958	0.0117425	-2.38077	-0.596231	-1.61297	-0.777152	1.33328	-0.446304	0.672594	1.6775	2.26746	0.886531	-0.959814	-2.65851	-1.85131	0.465703	-0.043821	-1.30174	1.82561	0.701368	-1.08211	19	0.339022	-0.962697	0.3948	3.32338	-0.935552	1.75333	0.726769	-1.49895	0.324616	-1.59676	0.815601	-1.69903	-2.46821	1.46615	-0.498082	0.384321	0.551561	0.311197	-1.72905	0.025506	-0.16282	0.653148	-0.0911403
20	2.02007	0.663101	-0.568957	-0.710728	-2.29884	2.50581	0.401574	0.248254	1.4918	-0.0700502	1.33731	0.600139	-1.13904	-0.93243	-0.305474	0.33724	-0.341356	-0.277319	-0.401689	0.730272	-1.63617	20	1.01956	-0.593776	-1.38024	0.120501	-1.29495	-0.140186	-2.26914	0.170143	1.01042	-1.23333	-0.602793	-2.22499	-2.21617	1.5707	-1.89816	0.00173021	1.02221	1.14553	-0.0172365	2.14348	0.488266	1.59501	1.63325
21	0.630286	0.767248	0.12864	-0.0851595	-2.34274	-1.87167	-2.63519	2.25798	-0.827908	-0.980173	0.642988	-1.30531	-0.685593	-0.629967	1.21431	0.520997	-1.17561	0.780972	-2.09417	0.135292	0.170208	21	-0.434071	0.507409	0.71515	1.28647	-2.39298	-0.401306	-1.0229	-0.69046	-0.324485	0.578774	-1.20887	-4.35011	-1.26425	1.89213	-1.54898	0.110317	0.633738	0.726737	-1.27983	-0.065986	1.52429	1.28745	2.48883
22	1.21842	0.501392	-2.75359	2.81041	-1.54193	-2.22146	1.28378	0.357044	-1.36704	0.852226	-0.74192	1.00173	0.369404	-0.439165	-0.0955462	1.07811	-0.528554	-0.0880846	0.672835	-0.0409367	-1.79436	22	0.215291	-0.682359	-1.64059	1.6964	-0.651242	-0.622892	0.135227	-0.149179	-2.93539	0.323396	2.07186	-2.78707	-0.252973	2.90933	0.168417	0.992319	-0.257293	1.46835	-2.52131	0.927537	0.604673	1.9744	1.17305
23	0.850527	-0.549834	-2.06769	-0.197189	-0.519965	-1.78263	1.18567	-1.59931	0.534964	0.384832	0.78815	-1.62548	-0.340995	2.07774	-0.164622	0.225239	0.0245506	-0.0529299	0.201383	-1.35493	-0.534512	23	0.454583	0.284181	-0.191654	0.619381	-1.56748	0.0403006	0.40665	-0.22556	-0.584088	0.0933443	1.04941	-6.49275	0.251318	0.798912	-1.6341	0.872362	0.821694	1.1178	-2.136	0.49722	2.11712	2.04342	1.34339
24	1.03918	0.0646648	-0.326045	-0.29421	-0.453363	2.26168	1.88259	-0.633562	0.470206	-0.133674	0.705885	-1.29702	-0.427262	-0.778527	-1.08609	1.48797	-0.544013	-2.64128	2.36786	1.29119	0.823778	24	-0.655793	0.66546	-0.0885753	-0.174673	-0.867927	0.906149	-1.37075	0.419189	-0.110063	2.20321	-0.108936	-4.81481	-2.12862	1.00218	0.0996293	1.16074	0.862939	0.873443	-2.87999	0.169687	1.72144	1.4969	2.84152
25	0.405515	0.565991	-2.14266	-0.311957	-1.13	3.52253	2.2726	-1.3657	0.374815	0.0350491	0.626156	-1.23565	0.203563	-2.13273	0.98342	-1.02308	-0.999054	-1.65623	-0.831935	-1.15334	-1.20428	25	0.239823	-0.244037	-1.06967	0.633174	-0.114774	-0.314561	-2.20363	-0.175696	1.21571	-1.23971	-0.317605	-4.21019	0.361552	1.19359	0.19317	0.941432	0.279721	1.49535	0.804503	0.120046	2.79792	4.10924	1.4021
26	1.60143	-1.12973	-0.810109	-1.79398	-0.211486	-1.3177	0.382058	-0.143089	-1.87086	0.980186	-1.07	-2.04729	0.0149019	-0.233913	-0.993543	-0.572149	-0.520471	0.726713	0.340669	-0.472097	-0.291709	26	-0.240792	-1.25698	-1.70663	1.82623	-0.0649609	1.02885	-1.0413	1.41103	1.79011	-2.36514	1.90277	-2.83088	-0.175558	-0.426332	0.266492	0.0293373	0.75446	2.5168	-0.643603	0.910666	1.26399	2.51501	0.961474
27	-0.995589	-0.0061439	-1.92021	-0.649899	-0.354031	2.68967	-0.778404	-1.1157	-0.358798	1.43884	0.572167	-0.645638	-1.03915	-1.75528	-2.31055	1.10364	0.642114	-0.523198	-0.996062	0.836805	-1.37675	27	-0.261888	-1.04607	-1.19201	1.02121	0.940422	0.721185	-0.873979	-1.78835	-1.05304	-1.53292	-1.72064	-6.73533	-1.60882	0.850567	-0.0617866	0.808587	1.61043	0.845641	-1.06816	1.9159	-0.103724	2.0679	2.21599
28	0.386363	0.248408	-1.64117	-0.343841	0.143895	0.0679071	-1.8127	-0.737876	-0.366237	1.46557	-0.359121	-1.69453	0.760619	-1.69743	0.274331	0.364324	0.270637	-0.591391	1.69556	0.641447	0.367678	28	-0.0244558	-0.629591	1.10718	1.56807	0.488952	1.2362	-1.43687	-1.14457	-1.11167	-0.541166	-2.6343	-1.93984	-1.55339	1.85248	0.152373	1.24832	1.07491	-0.00246935	2.14305	1.60441	0.446992	2.01312	1.12299
29	1.13549	0.516524	-2.53371	-2.79056	1.29565	3.58219	0.610247	-1.77557	0.103119	0.518779	1.50047	-1.59173	0.0163963	1.30798	-0.330149	-0.388007	0.623866	0.584897	-1.424	-0.0226424	0.926788	29	-0.765178	0.439655	-0.0464741	2.21644	0.870795	2.4696	-1.84643	-0.787714	0.169758	-0.707565	2.02599	-4.65544	-0.871524	2.03232	0.291695	0.178885	0.823648	1.28385	0.741233	1.58777	1.97585	1.70612	1.4071
30	0.872156	-1.00198	-0.310428	-2.17855	0.469911	-0.559382	-1.3899	-1.44403	-1.62805	0.27907	-2.75224	-0.457638	0.512468	-1.32896	-1.29253	-0.195474	-0.159766	-1.00771	0.919745	0.220706	0.736407	30	0.998483	-0.927043	-0.475471	-0.717976	-0.285264	-1.05773	0.161567	-0.117027	1.11564	-0.281217	-0.125708	-3.10323	-0.311717	-0.0557238	-3.31671	1.7527	0.331778	1.01039	0.115833	0.525148	2.15887	4.38957	2.04
31	2.15005	0.446948	-1.86235	-1.6415	0.183323	0.416894	0.214322	-0.138038	-0.205259	-4.04455	-0.466309	-1.62749	0.0938733	-0.489742	0.403318	-0.572442	-0.293425	-0.0928747	-1.53728	-0.223173	-0.556553	31	0.216326	-0.690583	-1.89482	0.984121	-1.2807	-2.0413	-1.17913	0.871522	1.40067	-0.239956	1.08151	-2.53604	-0.837783	1.74062	-1.49462	1.81526	-0.217074	0.501161	0.462869	-0.730366	0.346863	2.01814	1.47021
32	0.951264	-0.702413	-0.600273	2.74932	0.485771	-1.05954	0.897203	-0.152792	-0.158426	1.18232	-0.461516	0.106289	0.34122	-0.998119	-0.465218	1.29162	0.618959	0.166929	-0.480122	2.23783	-0.56946	32	-0.562979	0.0609979	-0.961515	1.93879	-0.563782	-1.29586	0.557035	-0.451169	-0.196461	-0.986867	-4.05931	0.495152	-0.473391	0.313773	-2.40602	1.73546	0.398799	2.0128	-2.18839	-0.344543	-0.508948	2.0228	1.38989
33	0.894299	-3.34148	-1.72408	0.0052712	-4.76618	-0.896981	-0.0302507	0.488242	-2.28785	-1.53583	0.0871968	-1.11879	-1.14415	-0.983759	0.454607	0.588401	0.841051	-0.512021	1.78341	-1.71768	-0.425205	33	-1.98796	-2.07886	0.355505	1.70724	0.512005	-0.862972	-0.493947	-0.831943	-0.134988	1.22812	-2.21072	-1.35539	0.446022	1.27041	-2.38096	1.52528	-0.0422574	0.122703	-2.07963	-0.187838	0.40078	-0.36921	0.959551
34	0.64484	0.470362	-0.635422	-2.71344	0.975963	-1.07729	-0.397132	0.542031	-0.382012	-0.532744	1.28845	-0.2024	0.844855	-0.974254	-2.36163	1.89167	0.742398	0.656896	2.11084	1.26661	-1.17678	34	-0.301369	-0.980274	-0.593938	1.83876	-0.0238716	-1.63444	-0.898598	-0.776864	1.34118	-4.31119	1.21098	0.183796	-0.959883	1.69359	-1.80012	-0.222633	0.492569	-0.754308	1.16016	0.967892	1.79271	2.28295	-0.0807247
35	1.22102	0.112538	-0.869195	-2.0185	1.91494	-0.651884	0.467612	1.73681	0.516119	0.669144	0.961896	-0.870079	-2.17923	-0.0557625	0.822716	-0.511548	-1.18162	0.23527	0.99082	0.37306	-0.889479	35	-0.905232	0.292432	-3.54017	2.01641	-0.01172	0.495168	-0.802209	-1.23617	0.572912	-3.51987	-1.87186	1.4362	-1.45388	2.1658	-2.49185	1.04502	-0.104446	0.24403	0.592631	2.12088	0.372739	2.69561	1.855
36	0.277307	1.37867	-0.208942	-0.0983411	-2.93021	2.99809	-0.736875	-1.31798	-1.61115	0.842615	0.578122	-1.93872	-0.865111	-0.229084	0.311605	0.301007	0.605231	1.51954	0.279981	-0.19211	-0.735673	36	0.309986	-0.435821	-3.45057	2.22093	0.209379	-1.19352	-0.250986	-0.889935	0.838341	-1.9683	-2.16254	-1.07135	-0.00438617	-0.0481992	-1.0113	0.924916	0.331143	2.16664	-1.92069	0.244847	0.674719	2.65476	0.975645
37	0.541297	-0.0171342	-2.8294	-1.0785	-3.60478	-0.226316	0.857317	-3.17523	-0.241806	1.12611	-0.49897	0.26487	-1.34294	0.156001	-0.757839	1.08968	-1.33693	-2.43999	0.867093	0.270221	1.06287	37	0.732863	-0.812261	-3.18289	0.480849	0.34825	-2.07664	-0.137098	2.04985	0.237699	-1.02577	-0.160162	-1.58261	-1.92593	0.641497	-1.33159	0.358406	0.698991	2.2568	1.19194	2.32451	1.79427	-0.460396	1.26907
38	0.625503	0.0602915	0.175192	-1.81069	1.78764	0.763702	1.1966	-1.50779	1.44246	-0.861348	-0.778361	0.329905	0.637593	-1.08548	0.629342	0.466512	-0.581108	-1.77123	-0.182144	1.36403	0.789851	38	0.41653	-0.740965	-0.309185	2.83158	-0.0321381	-0.459109	-0.732602	-0.254925	0.468089	0.612404	-0.127599	-2.4464	-0.136345	2.38328	-1.2186	0.644356	0.627301	1.45365	-1.29067	2.45578	1.76561	3.8365	1.84239
39	1.69526	0.188985	-2.31562	-1.09583	-3.02346	1.10911	-1.46069	-1.34155	0.89925	1.4776	0.216437	-0.405124	-1.06044	-0.12986	0.670914	0.525488	-0.883671	0.224001	1.02328	-1.61427	-0.417594	39	-0.560235	-0.950121	-0.216671	1.70007	-0.525926	1.1272	-0.0358205	0.78894	0.481558	-0.130588	-1.67034	-3.6203	-1.51649	-1.52098	-0.917859	0.929453	0.177015	1.58965	0.498663	1.335	0.567069	0.251942	1.69794
40	1.07548	-0.0345967	-1.7607	-2.32875	-1.98385	-1.13365	0.459924	-1.72456	-0.7975	1.20198	0.257356	-0.9858	-0.774318	-1.28118	-1.87154	0.34769	-0.35479	-0.381196	-0.191045	-0.632068	-1.00156	40	0.305964	-0.64744	-0.930475	2.28981	-0.301949	0.27482	-0.796369	-0.803377	0.0732505	-2.73914	-0.847963	-0.011909	0.288885	1.30079	-1.93897	0.577943	-0.198612	1.24749	-0.470053	1.83338	1.30389	-1.02084	1.25083
41	0.792147	0.00208008	-0.715384	-2.93483	-1.6258	0.244633	-0.816187	-2.08657	0.0799716	0.0465786	1.16926	-3.38622	-1.88838	0.388608	1.82446	-0.148469	-0.263925	-1.02135	0.4542	-1.34243	-0.146432	41	0.0126059	0.447885	-1.34697	1.24132	0.190718	-0.171892	0.012174	-0.320926	0.870801	0.617002	-0.715533	-2.59348	-1.97309	2.06242	-2.56741	0.191325	-0.498609	0.648428	-3.43286	1.1471	-0.204878	-0.59441	-0.062762
42	0.052206	0.809539	-2.01953	3.2979	-1.4767	1.01769	-0.337533	0.0574233	-1.73664	0.150779	-1.3512	-2.49161	-1.41869	-1.67802	1.31928	1.30059	-0.565327	0.414516	1.23335	-0.265627	0.512059	42	-0.65894	0.354788	-2.72227	1.62816	-1.3225	-0.549757	-2.24469	1.27261	1.916	-1.21033	-1.5091	-2.32754	0.0357113	2.58666	-0.9682	0.544207	0.149313	1.52103	-2.77904	1.2916	0.473015	0.659215	0.372495
43	0.506337	-1.70269	-2.45195	3.81845	-0.881244	0.667334	-1.5464	0.136508	-0.520762	-0.807953	0.717868	-0.356378	-1.46766	-0.0255904	-1.35393	0.506374	-0.534079	-0.632654	-0.68672	-1.36906	-1.69696	43	0.322502	0.0939853	-1.54952	2.63466	0.272099	0.781531	-0.436429	-1.52799	0.215508	0.777057	-0.177036	-2.33333	-0.52528	2.32906	-1.67211	-0.119097	-0.482048	0.755001	-2.70582	1.77402	1.92507	1.8486	0.352389
44	1.34822	0.0563131	-2.65095	-0.789917	-0.247972	4.05246	0.72467	0.252929	0.845068	-0.324774	-2.92307	-1.61726	-0.142351	-1.23271	-1.66218	0.863265	1.50502	-1.22614	0.354264	-0.32018	-2.81616	44	0.110372	-0.36404	-1.20954	0.360882	0.582338	-0.13713	-0.00241048	0.407262	-0.733178	2.01229	-1.0069	-3.31729	-2.50079	2.32348	-0.324643	0.0859397	0.573162	0.207235	1.47948	0.64015	1.23839	0.422335	1.54408
45	1.61739	0.312598	-1.2741	-1.23184	1.00463	2.29517	-0.228323	0.387258	-0.225	-0.950522	1.20308	-3.23813	1.97553	0.0872397	0.874214	0.98666	1.27237	0.74177	-2.38134	-0.749195	-0.494288	45	-0.994125	-0.217234	-2.38632	0.786615	-2.37333	-0.528031	-0.806977	-0.972383	-0.675161	2.60717	0.674618	0.567915	-0.799805	1.18453	-3.12842	0.774238	-0.368076	1.56204	0.710052	0.172937	0.262364	1.15913	1.01405
46	1.04021	-2.51141	-0.782069	-0.829462	0.380759	0.369132	-1.0819	-1.62543	-1.83127	-0.419145	-0.725478	2.0555	0.571509	0.107482	0.0887811	1.55015	-0.45313	0.848822	0.898905	1.06886	-0.834658	46	0.191516	0.277712	-1.50734	2.3464	-0.394091	-1.35823	-2.069	0.519384	1.24389	2.31056	-0.847081	-3.61966	-1.54828	2.62154	-0.861917	0.572074	-0.100723	0.848312	2.00462	0.0732362	2.1549	1.93372	0.875688
47	-2.38818	-0.821777	-0.464455	-1.61879	1.05206	0.821925	-0.0910982	-0.15996	0.397021	-1.12428	1.95704	0.0638138	-0.989589	-0.57157	1.49068	0.900933	0.950321	-0.555122	-0.968358	-1.30165	0.74748	47	-0.200445	0.58976	-0.389515	1.32796	-0.291505	0.404632	-2.00918	-0.377656	-0.682548	-2.65007	0.0343968	-2.60599	-1.13629	0.80479	-0.834556	-0.277012	-0.386554	0.447596	-2.3499	0.497979	0.66782	0.719868	1.11527
48	1.52989	0.582149	-0.852225	-1.93841	1.54258	-0.511274	1.42932	-0.402682	-1.26197	-1.21407	1.24551	-2.45472	-0.133705	-0.50938	-0.553374	0.0245839	1.33289	1.59296	0.88513	-1.38764	-1.31428	48	0.538992	-1.38757	-0.304806	0.899025	-0.132632	-0.602968	-1.06543	0.233011	0.997713	-1.98286	-0.82799	0.798301	-1.16805	1.91941	-1.00299	-0.340859	-0.641515	0.854737	1.18566	2.56163	0.893631	0.193816	0.0571809
49	0.870364	0.254434	-1.68325	2.2121	-1.58539	1.13751	-0.424686	-0.19454	-1.96715	1.90112	1.49699	-1.29612	-0.545671	-0.662518	0.274833	1.56026	-0.473137	-0.978186	1.63546	0.0904098	1.21031	49	0.316388	-0.238215	-1.27688	1.03757	-1.43753	-1.45486	0.161334	1.19401	1.01843	-1.4875	1.07065	-4.4243	-1.36092	2.25557	-0.155212	0.375452	-0.387166	-0.404409	0.713769	0.392021	-0.584169	1.78397	0.816546
50	1.99458	-0.00272391	-1.10033	-0.918195	-2.92304	1.84984	0.191433	0.200706	0.0758934	2.83186	0.83351	0.172627	1.69183	-1.99521	-2.89427	1.27054	-1.03307	-1.01572	-0.157001	0.360581	0.890651	50	0.499996	-0.980504	-1.28418	1.15581	0.873207	-0.112463	-0.77178	-0.621886	-2.00707	-1.94385	-2.16597	-4.38271	-0.0436361	1.76414	0.0779205	0.876647	-0.634412	1.53651	-2.24143	0.807869	2.38916	0.63879	0.492062
51	-1.00193	-2.12077	-0.17563	0.126416	-1.70697	1.47547	0.949837	-0.0716127	-2.70639	0.660617	3.61232	-1.15649	0.951229	-0.745306	0.815431	0.203291	-0.594182	-0.558	-2.16471	0.654213	1.46404	51	0.694276	0.0869444	-2.47696	1.33155	-0.493091	-1.3324	0.840756	-0.9904	-0.772624	-0.142881	-1.9068	-3.65347	-1.3423	-1.50926	-3.87807	0.402069	-0.467142	0.405036	-0.923155	0.072738	1.56225	0.519061	1.29234
52	2.24812	0.0464038	-0.896653	-1.11245	0.576663	1.77362	-0.247751	-1.32318	-0.839941	1.05624	0.593003	-0.314606	-1.32917	0.868725	1.69105	0.881783	0.415998	-0.152462	0.420265	0.814339	-0.0458623	52	-0.988486	0.568036	-2.58977	1.37061	0.0889459	-1.54722	-0.166435	0.00760768	-1.36132	-0.421424	-1.36487	-0.369433	-1.43063	0.998877	0.805089	1.05535	-0.643189	0.0968946	-0.398546	0.304764	2.15409	-0.0137892	0.467498
53	2.44713	0.872633	-0.110592	-1.19675	-0.33471	2.23784	-0.0285642	-1.25349	0.568576	-0.343289	-1.41272	0.382878	-0.393141	-0.136061	-0.547719	0.665721	-1.43375	0.80443	-1.3484	-0.676893	-0.150853	53	-0.798897	1.46405	-1.75029	0.713608	0.441636	-1.38895	-0.931784	0.955821	0.540371	-0.0148049	-1.05	-0.299224	-0.752927	1.22653	-0.100066	-0.573832	-0.420305	-0.414951	-1.42765	0.0393979	1.74551	2.37352	1.22804
54	1.36677	0.615478	-1.67603	-0.887039	-0.09547	1.79222	-0.197045	-1.27113	-0.765367	-1.06196	0.884312	-0.473008	-0.9223	-0.0319882	0.599925	-0.0348865	1.50113	0.00945196	1.24573	0.00629239	-0.261057	54	-0.0912036	-0.440724	0.703431	1.07791	0.140191	2.25306	-0.254739	0.489643	-0.0213534	-0.253275	-2.63277	-3.28684	-0.970977	0.765131	0.597943	0.326112	-1.02002	0.458256	1.12505	-0.346493	0.886088	0.818589	0.514166
55	1.23421	-3.60688	-1.08223	-0.338762	-0.560614	1.05603	-0.664747	-0.730753	-0.785243	-0.394665	-1.70988	0.473621	0.402449	-0.615309	0.17111	-1.19443	-0.410373	-0.635448	-0.747111	-0.598931	2.81049	55	0.45233	-0.217662	-0.951273	1.55603	2.06134	-0.269999	-0.435459	-0.739704	0.540935	1.18061	-2.27693	-1.7488	-1.19809	-0.704691	0.764459	0.398014	0.366859	0.37278	-0.0438426	-0.526126	1.30521	1.08936	0.254511
56	2.26154	0.114501	0.081416	-3.049	1.66952	1.03192	2.34464	-1.69611	0.948861	0.424474	1.00659	-0.826769	0.157562	-0.370096	-0.19255	0.408631	-1.40764	-1.71546	1.0644	0.479903	0.167247	56	0.206947	-0.137576	-0.92894	-0.350389	0.679185	-0.24226	-1.6646	1.77713	1.71507	0.676983	-0.786674	-2.53577	-1.80536	0.787558	-0.389898	-0.143966	0.803437	0.778795	-3.09646	1.02923	1.50432	-0.85698	-0.0791123
57	1.45789	-1.9783	-0.236665	3.84954	2.32828	0.360652	0.702	-2.17368	-2.12766	0.340109	-2.09437	-0.792373	-1.59628	-1.17662	-0.995351	0.204146	-0.168614	-0.256014	0.564461	-0.0535471	0.184763	57	-0.301469	0.332469	-0.482316	1.12005	-0.79128	-2.20019	-0.324659	0.207562	1.32107	-0.270827	-1.31801	-2.73892	-0.995269	-0.772238	1.54424	-0.146995	-0.435263	1.91171	-2.91555	0.771111	1.37688	2.96501	2.20893
58	1.6902	0.716775	-1.10122	2.10217	1.03941	0.904583	-0.886628	0.898881	-1.39727	0.249206	0.890415	-1.81157	-1.12667	1.08463	0.849768	0.652566	-0.123342	-0.774786	-0.111373	-1.20561	-0.679351	58	-1.61592	0.840255	-1.42309	1.52815	0.943002	-1.69767	-1.53611	0.512159	-0.0563438	1.71821	-1.80721	2.0216	-2.36298	-1.23437	0.0504056	-0.922644	0.492016	1.27993	-1.50314	0.784145	3.33989	0.98874	0.368383
59	1.30393	-1.1374	-1.27935	1.81588	1.92828	1.71884	-0.775052	-1.33022	0.299569	-0.647784	-2.17295	-3.44508	-0.451347	-0.577131	-1.24286	0.57881	-0.0170929	-0.890545	0.0249676	-0.679738	1.17372	59	0.353218	-0.142281	-0.484412	-0.604536	-2.56648	0.32111	-0.691208	-1.3974	0.75639	1.3715	-1.592	0.265621	-2.64804	0.0158674	-0.0377656	0.0238595	-0.409526	0.689337	0.610487	-0.242091	1.74631	0.969068	0.342096
60	1.10546	-1.50591	-0.0434944	-2.33979	-3.25174	-5.1202	-1.62891	0.58938	-0.634527	1.01272	1.82465	0.320992	-1.02982	1.4782	-0.252387	0.69666	0.0527519	0.217651	0.124364	0.675268	0.01757	60	-0.0873817	-0.82377	-1.25456	0.362781	1.85693	-0.41818	0.0692679	0.258854	0.543317	-1.90441	-0.632844	0.695201	-1.64605	0.780194	-0.579176	-0.621455	0.411313	1.13991	-0.669186	-1.13787	0.392763	2.21822	0.552581
61	1.33727	-2.5347	-0.478884	-1.30374	1.27376	1.65312	-1.14362	0.777431	-1.91577	0.585786	0.461598	0.50395	-0.216157	-0.301266	-1.42854	-0.460841	-0.956453	-0.470962	-1.85546	0.680743	-0.612458	61	0.15294	0.363823	-1.01911	1.80192	-0.388547	0.852447	-0.298763	-0.912648	-0.148328	-2.53429	-1.27429	0.180354	-0.467122	2.99878	-1.44423	-0.278093	-0.206455	0.216349	-0.472978	-0.751964	-0.205636	2.80422	-0.00822985
62	1.07174	-1.0035	0.134082	-3.56562	-3.87754	-0.227866	-0.0811541	-1.68001	-0.441057	-1.11933	-0.797822	-1.64472	-1.82732	0.0865894	-0.21065	0.116317	-1.06493	0.542232	0.669616	0.0480497	-0.312457	62	-1.75103	-0.0382537	-0.881109	1.54955	-1.65249	-1.24952	-0.0578935	-2.01195	1.07588	-3.43935	-0.686929	-1.59473	-1.55484	-1.19921	-0.420457	0.559918	0.142857	1.04157	-2.3162	-1.03937	1.79214	1.83804	2.3956
63	0.427274	1.69861	-0.350451	-3.0016	1.30887	1.57662	-2.74357	-0.947849	1.73865	-0.784418	1.23125	0.062033	0.38495	1.67079	-0.618745	0.31153	-1.11493	-0.745712	-1.02045	-0.793929	1.66314	63	-0.342221	0.69786	-1.53271	1.8371	-0.314022	-1.21851	-0.0999798	-0.0630693	0.322909	-3.60692	-1.74478	-2.51638	-0.203503	-0.905754	-1.2028	-0.44793	0.758324	1.28216	-0.032147	-0.335283	-1.26248	1.75016	1.81912
64	0.333388	-0.765658	-0.942625	2.00643	-1.94698	1.86721	-0.642975	-0.775522	0.141414	-0.725491	-2.15052	0.117892	-0.445477	1.45824	-0.365783	0.661453	-0.160502	-0.884966	-1.14335	-2.11387	0.513372	64	-0.686898	0.792502	-0.833029	0.235182	-0.0548677	-1.36038	-0.864257	0.106302	-1.22419	0.533059	0.0193189	-0.832806	-0.694283	0.431718	-0.189201	0.190931	-0.557537	-0.422968	-2.04166	1.65999	-0.140312	2.72463	1.46805
65	1.21173	-0.695134	0.0176288	1.68425	-2.10483	1.52547	-1.42392	1.18756	-0.858472	0.725522	-0.15644	-0.755801	-2.92673	0.0388284	-1.17283	-0.620021	-2.20317	-0.70184	-0.94343	2.16838	0.198275	65	0.464892	0.340816	-1.24188	3.18368	1.08892	-0.623312	0.476182	0.885291	-1.38422	0.241983	-0.888521	-1.40405	-0.625879	2.16158	-0.1887	0.534269	-0.302151	-0.283242	0.354038	2.51351	0.427492	1.81586	0.364041
66	1.14438	1.49498	-2.58781	-0.889364	-1.76162	2.3572	-1.79829	-0.811028	0.00421045	1.14071	0.736976	0.890458	1.05141	-1.08197	-1.86346	1.50081	-1.48527	0.0175839	-0.604492	0.916229	-1.40874	66	2.31769	0.261041	-1.46097	-0.396129	-0.754776	-1.4708	0.870173	-0.865172	0.190897	1.41903	1.37425	-0.328064	-1.27284	-0.766334	-2.10886	0.809935	-1.13426	1.7555	-0.145026	1.51313	1.61428	0.0187108	1.69022
67	0.893053	-0.682087	-0.754099	1.08918	-1.57014	2.52316	-1.50645	-1.45466	-0.352972	0.770292	1.04593	0.00437409	-0.373662	-0.398219	-2.10316	-0.0914645	-0.272718	0.941828	1.21226	-0.409597	0.2625	67	0.272433	0.394513	-1.89822	0.575806	0.635829	-0.551857	-1.10551	-1.28356	0.210018	1.33502	-3.2427	-0.718079	-0.940339	0.129942	-1.40346	1.03676	-0.223198	0.887289	-1.27527	2.51283	0.720576	1.15943	1.08952
68	-0.432887	0.292022	-2.07226	-2.70832	1.47905	0.565772	0.778421	-1.34166	0.5982	1.01247	0.749749	-1.7194	-0.359476	1.62646	0.669941	-0.487436	-0.176053	1.05374	-2.09885	-1.11504	-0.488012	68	1.07326	0.488294	-2.76672	2.29333	-0.48564	-1.81859	-0.36394	-1.22353	0.541099	-2.75162	-0.555828	2.08054	-2.30895	-0.538519	-1.71512	0.301184	0.720119	1.77618	-1.4358	3.036	1.69938	2.24635	1.15882
69	-0.100383	-1.25006	-0.913616	0.534874	-1.34669	1.79185	-3.78326	-2.21904	1.76216	-0.469508	1.23216	0.643496	0.680181	0.480287	-1.64913	-1.40488	-1.20293	0.0699679	-0.889426	-1.20796	1.2422	69	0.162469	0.609475	0.395419	1.58162	-1.78644	-1.13304	-0.676074	-1.57131	0.24903	-1.61886	1.09128	2.16739	0.815338	0.931089	-2.46999	0.567851	-0.933592	-0.517818	0.983952	2.16949	2.78693	2.08946	0.874924
70	1.83911	1.08257	-0.909028	2.74754	-0.351004	1.41299	-1.15939	0.973687	1.77941	0.122905	-1.41525	0.40928	-1.23047	1.33889	0.244952	-0.159244	-0.0925632	-0.852791	-0.248993	-0.337265	-0.889687	70	1.3878	0.614736	-1.78235	2.24765	0.79285	1.38213	-0.707315	0.663766	0.716574	-2.10027	1.71431	2.87128	-1.23433	-1.18048	-1.14755	0.412537	-0.716545	1.01559	-0.316934	0.288235	2.40449	2.0233	0.260381
71	0.876861	1.37333	0.854391	1.76601	-1.66498	1.31708	-0.235529	-1.25001	-0.738366	-0.993522	-0.332647	1.02959	-0.818372	-0.10451	0.00674859	-0.672147	-0.330105	0.856926	-0.121882	-1.56277	1.33447	71	-1.07119	1.51858	-0.503853	0.790564	-0.0759445	-0.0908589	-0.28756	-0.981046	-1.90906	-3.39418	-0.93382	2.67032	-1.14391	-0.0998943	-1.48294	0.0748998	-1.14371	0.537202	0.58376	-0.199913	0.096163	1.90045	0.902642
72	1.55572	-2.05542	0.625365	2.09952	-0.205005	2.27621	0.376604	1.0269	-0.634326	-0.269872	1.41952	-0.961029	1.10264	-0.0764	-2.11085	-0.135888	-0.436401	1.29136	-0.64321	-0.16034	-0.286371	72	-1.47865	0.628437	-1.1409	0.512637	0.113076	-0.400347	-1.34719	-1.71368	1.32688	-1.68662	1.72879	3.24281	-1.36446	-0.723516	-0.320314	0.474635	0.140746	0.732443	-0.281753	2.69411	0.49229	-0.101036	-0.445915
73	1.99388	-1.46534	0.0873666	1.44523	0.600863	1.19898	0.0592902	-0.450649	0.313193	0.293429	-0.452441	0.17617	-1.2444	0.362255	-0.202566	-0.635186	0.0854922	-0.47915	-1.79525	1.11789	0.056939	73	0.821171	0.0513275	-2.11812	0.0601387	-1.28084	0.35229	-1.80711	-1.35689	-0.105013	2.18821	2.99105	2.22172	1.44698	0.419654	-0.804254	0.065224	0.355258	-0.605036	-0.548326	0.063122	-0.236745	0.00911374	1.43643
74	2.30299	-1.23498	0.471897	-3.06439	-0.111331	1.97462	-0.115477	-0.503049	-1.71163	1.07172	1.20176	-1.43285	-0.793004	0.795513	0.400799	1.25856	-0.994275	-1.28075	-0.210517	1.11034	0.905039	74	-1.35077	0.433758	-1.48938	2.64417	0.299544	-0.55711	1.04061	-0.196769	0.26362	-2.95947	-1.69195	-1.36415	0.966218	-0.58186	-1.12935	-0.522118	-1.2615	1.45224	-1.37256	1.54471	-0.332937	-0.171284	1.4239
75	1.83087	-0.12391	-0.705717	-2.07866	-4.4443	1.84838	2.53715	-1.32783	-0.596568	0.190357	1.41809	-0.0677464	-0.846536	-1.65308	-1.07436	0.351118	-0.167352	-1.41008	-0.409901	0.390668	0.106651	75	-0.605829	-0.498446	-1.14488	1.96848	2.94544	-0.352315	0.717896	-2.06547	-0.942407	-1.84148	-1.34266	2.17022	-1.30805	0.595117	0.334341	0.31479	0.0757965	0.312903	1.45427	2.09115	1.15872	0.41019	3.03272
76	1.26817	-0.70942	-1.58313	1.25619	2.26681	1.93176	-0.490615	1.65843	1.75026	-0.336495	-0.298714	-1.9774	1.62536	-1.26172	-0.448021	-0.539663	-0.696261	-0.135874	-0.981207	-0.558608	-0.03504	76	0.0477418	0.156993	-1.41226	0.874743	0.356095	-1.42461	-0.254213	-0.701901	-1.25083	-2.12763	-0.8963	2.13768	-1.40723	0.471764	-0.018202	0.620161	-0.768406	0.267075	-0.675485	0.393244	-0.605892	-0.21316	1.00575
77	1.80967	-1.08379	-0.137326	2.89172	1.34747	1.38759	-1.62175	-1.36971	0.0421022	-0.806725	0.691255	0.408015	0.345198	0.82958	-0.874182	-0.504025	-0.564793	-0.604684	0.396016	1.66236	-0.901302	77	-0.479154	0.46037	1.35457	2.11454	-1.21801	-0.494256	-2.10898	2.54264	-0.463315	-2.88192	-0.559034	1.5927	-1.22322	1.12219	0.164062	0.279034	-0.738014	0.639829	1.55632	0.922975	0.831375	1.74599	2.16679
78	1.29329	-0.597442	-0.646193	-3.57518	1.09012	2.34541	0.298803	-0.122071	1.75646	0.0714064	0.25691	1.22689	0.553093	-0.857186	-0.634191	-0.166229	0.0814319	0.176667	-0.637616	0.270464	0.871216	78	-0.763497	0.696837	-0.941585	0.733076	0.583769	-0.663135	-0.275369	-0.953518	-0.347311	-2.9299	-0.107249	3.83278	1.41936	-0.287127	-0.579266	0.0761408	-0.311207	-1.11452	0.0773135	0.299999	0.263477	1.22564	1.35414
79	0.0646463	-1.28381	-1.36481	-1.75689	0.337104	3.01483	-1.41259	-2.49807	1.36805	-2.26793	1.03187	0.687377	-0.855321	-1.05587	0.134418	-1.01188	-0.762773	-0.22111	0.762776	-0.858166	0.507596	79	0.47877	0.500854	-2.0772	0.369107	-0.0469219	0.00374911	-0.955549	1.2155	-1.30139	0.237932	-0.0974711	3.19954	1.94774	2.87211	-0.553022	-0.156499	-1.61698	0.921138	-1.21397	-0.0106474	1.13725	-0.940171	1.04377
80	1.23881	-1.11888	-0.691295	-2.18261	-2.4997	-2.74309	-0.87388	-2.04209	1.25778	0.920957	1.15262	-1.61046	0.776992	-1.47821	-0.509306	-0.016725	-0.62777	0.169565	-0.564931	-0.587812	0.919865	80	0.124193	0.198259	-1.67452	1.91887	-1.4339	-0.755443	0.427554	-0.136735	-0.902186	-0.366576	-1.44666	0.370047	-2.42076	-0.315525	1.00179	0.358358	-0.782117	-0.58755	1.01047	0.414363	0.767416	2.11945	0.265046
81	2.81412	-0.925409	-0.87118	1.98301	1.19353	1.58535	0.780589	-0.582574	-0.829857	0.212466	-0.622832	-1.23013	-2.17148	-0.114133	0.196987	-0.980931	-2.0882	-1.00005	-0.877296	-1.70155	-0.171601	81	0.85327	-1.06922	-0.471806	0.703781	-1.21702	-0.564829	-1.10212	1.13145	-0.902958	-0.272936	2.97965	-1.43755	0.102196	0.380504	-0.154518	0.775721	0.916978	0.559689	0.461443	1.51444	0.938634	-0.426989	1.19257
82	0.623458	-0.702524	-1.32285	1.62106	-3.22273	2.12259	-0.315016	0.300411	0.344116	-0.664461	0.90316	0.662016	-0.784148	0.20122	0.268097	0.589737	0.0363633	-0.575508	0.0763857	0.0723815	-0.167097	82	0.751829	0.492979	-0.58676	0.733838	-1.74573	-0.534566	-0.449305	-0.0716401	1.48089	0.14931	1.26128	-0.687206	1.51118	0.323628	-3.471	0.306032	0.52139	1.61833	0.706304	2.42676	0.231199	1.66202	1.94033
83	2.41181	-0.471297	-0.271372	2.06158	-2.91463	2.08619	-0.672632	-0.173412	0.202364	2.52155	1.43993	-0.160149	-0.552527	0.343147	-0.892511	-0.444984	-0.922258	-0.881958	-1.23253	-0.20964	-1.15593	83	0.0667535	-0.0857764	-1.19137	0.811683	-1.3449	-0.018936	-0.345872	1.31557	0.0352312	-1.8216	0.602057	-2.33405	-0.359754	0.362001	-1.25901	0.483792	-0.448007	0.417721	2.11771	0.883605	0.540086	-0.192029	-0.816895
84	1.63277	0.140936	-1.2928	4.22891	-1.7755	-0.134872	-1.86652	0.0334731	1.81107	1.40738	2.11191	-0.673662	-0.639127	-1.27546	0.489389	-0.202097	-1.16701	1.4833	-0.138203	-0.293191	0.172502	84	-0.0410893	-0.444944	-1.66569	-0.15565	0.317548	-1.19803	-1.15383	1.33843	-1.59537	-2.43561	1.90053	-2.11808	-0.391252	0.0412128	-1.03162	0.390261	-0.45735	1.12404	0.963227	0.502149	0.775951	1.53615	0.478095
85	1.6601	-0.208885	-0.483275	2.54884	-2.1403	2.19723	-1.14139	-0.855091	0.499784	2.08036	-1.79444	-2.03518	-0.101967	-0.309863	-0.900705	-0.0379039	-0.23856	0.65904	-0.384176	0.105943	0.610814	85	0.987813	0.812278	-2.75335	2.22578	-0.628415	-1.12413	-1.9255	-1.21008	-1.47653	-1.10428	1.13765	-2.55669	1.44229	-0.553421	0.585419	-0.836666	-0.676988	1.05975	-0.628688	-0.449123	0.546236	0.360206	0.166336
86	1.27753	-0.117887	-1.12383	2.96797	-2.4184	0.915922	-1.88971	-1.44037	0.644091	-2.28912	2.2642	0.684013	0.480369	-1.72857	-0.337723	0.0656611	1.79731	-0.620725	-0.230889	2.48312	0.421081	86	0.174626	0.339567	-1.88542	1.54869	-1.53901	-2.78132	0.378209	-0.0603065	0.667771	-1.10723	1.63148	0.185304	-1.30835	0.0303811	-2.3151	0.725579	-1.0124	-0.12277	1.5979	0.251857	-0.0720533	0.181338	0.160518
87	2.72177	-1.04982	-2.31405	2.70414	-2.93737	2.19366	-1.5763	-1.7285	1.65628	1.13445	-0.783888	-0.186148	2.34671	0.177681	0.139245	-1.19579	0.294272	1.48477	-0.123235	2.77271	-0.437383	87	1.55826	-0.371473	-2.71104	1.41945	-0.541876	-0.909772	-0.11556	-0.244621	-1.9279	-0.633569	1.77704	0.713697	0.00968597	0.919802	-1.63534	0.635608	-1.08727	0.444183	-0.354459	-0.882743	-1.11228	0.705178	1.20812
88	0.794931	-0.223852	-1.74529	3.50355	2.58783	2.13094	1.29847	-2.60684	0.726731	2.37779	0.304666	-2.2097	-0.84018	-0.313503	1.35125	1.04638	0.0676489	-0.491552	-0.818386	1.83233	-0.196019	88	0.29556	-0.0318508	-2.24775	1.07108	-2.11977	-0.486784	-2.24618	1.21364	-0.697189	-0.886749	2.3325	2.08691	-2.25244	-0.2472	-2.0149	0.00263113	-0.107114	1.28058	-1.21674	0.441324	1.42013	0.77035	0.0701155
89	0.806794	-0.0533497	-1.25583	2.00162	-2.02527	-2.78266	-0.655898	-1.36096	-1.362	0.818645	-0.0348168	0.896822	-0.0551627	-0.914092	1.91461	0.303105	-0.658245	-0.977889	1.00175	-0.563033	-1.44483	89	-0.208127	1.264	-0.831614	1.48606	0.112016	-0.669449	-2.22208	0.300512	-1.24643	-2.06497	-1.33776	0.55734	0.285109	2.84454	-0.462655	-0.396455	-0.0328301	0.847188	1.12077	2.32118	-0.689119	0.871895	0.60972
90	1.74092	-0.825427	-1.29972	2.08514	-1.37119	-2.26145	-0.728573	-2.11316	0.351332	1.74663	0.317727	1.19054	0.970179	-1.66105	-0.683378	0.0657809	1.56439	0.447731	1.11475	-0.841916	0.093889	90	-0.0361397	0.278361	-2.02342	-0.268303	-0.00304624	-0.18344	-1.47126	0.504145	0.427389	-1.54696	1.88499	1.98849	1.50227	-0.476635	-1.4859	0.174069	-0.535282	1.82474	-0.978286	0.838224	-1.37245	1.23954	-0.220146
91	2.97587	-0.682491	0.812129	3.6228	-1.54718	2.92375	-0.344695	-2.3202	0.092901	-1.09497	1.5038	-0.168181	-0.587322	-0.849007	0.110441	-1.51738	0.434339	-0.686115	-0.894228	0.0362273	0.0198638	91	-0.313701	-0.835926	-1.6392	0.425832	-1.01614	0.5901	-0.875314	-0.0713434	-0.102756	-2.46418	2.62344	-1.95593	-1.37307	0.259615	-0.509425	-0.461258	-1.12764	0.447088	0.785878	1.62039	1.47663	1.16362	0.290511
92	1.61084	-1.14181	-0.711438	1.53266	-0.406487	1.52304	-0.427687	-0.717432	2.03654	0.163591	0.0925381	0.149768	-0.437661	-0.922895	-1.46579	-1.42852	1.1235	1.0883	0.41193	-0.27421	-0.0449448	92	1.21293	-0.483464	-0.58199	0.575662	0.308487	-1.75347	-1.66366	0.394936	-0.436941	-1.33332	1.74236	-2.3809	-0.87904	0.7961	-0.851962	0.189489	-1.28082	0.647458	-0.528455	1.02891	-0.654558	1.51562	0.462629
93	2.22641	0.175655	-0.653503	-2.46549	-1.91661	1.34729	0.220411	-0.519258	0.263492	0.644073	0.443716	-1.39601	0.221712	-0.382712	-0.395951	-1.30263	-0.304657	0.261133	-0.203632	-0.694972	0.44481	93	0.804597	0.424821	-0.78594	-1.03753	-0.627474	-2.82709	-0.368469	0.0723626	-0.219246	-2.53173	1.66948	1.67541	0.641524	0.353633	-0.971039	-0.456314	-0.946205	-0.81262	0.164971	2.28357	-0.574564	1.81069	1.265
94	1.37446	-0.317191	-0.680065	1.86009	0.241736	3.13255	1.78777	-1.03957	0.36193	0.690684	-2.72703	0.516781	0.963215	-0.935465	1.51298	-1.1444	0.198629	-1.3358	0.118225	0.871242	-1.01914	94	-0.872691	-0.195289	-1.95422	0.590327	-0.718535	-0.203361	-0.469136	-0.41405	-2.40026	-1.24059	2.61282	0.880493	0.724386	1.87776	-1.86412	-0.432337	-1.49735	0.33521	-0.355191	0.706218	1.34777	-0.933436	1.36917
95	1.42137	0.0182318	-0.22284	3.26349	-0.963405	-2.00148	-0.265646	-2.06048	-0.9704	-0.215689	0.831986	-0.257997	-1.18115	-0.262971	-0.225516	0.163618	1.13778	-1.12368	2.0916	-1.52919	0.847653	95	-0.364872	-1.83013	-1.76161	0.608662	-0.233077	-0.304287	-0.0932651	-0.166463	-0.262432	-2.24928	-2.94457	0.337962	0.71525	0.600178	-1.1029	0.0838876	-1.28397	1.15104	-0.214169	0.0646081	1.02325	1.51773	-0.571783
96	-1.12341	-0.493761	0.390925	2.74921	-0.304149	3.03621	0.220039	-0.546516	0.842827	1.51848	0.522795	0.439853	0.0166094	-0.540326	1.78012	0.100364	-0.0436737	-0.878013	0.0861551	0.0694621	-0.893316	96	-0.45173	0.617051	-2.0091	-0.0281954	0.0498897	-0.418434	-1.53575	0.0270826	-0.422868	1.72581	1.11399	0.967528	-0.218584	-0.0972299	-1.12508	0.236509	-0.109728	0.444841	0.085068	-0.966047	-0.270647	1.79588	1.42633
97	1.26638	-1.39894	-0.113806	2.07929	-1.38976	0.840935	1.26054	-1.06723	1.12956	0.85307	0.961793	2.70246	0.499197	0.871966	-0.291638	-0.170698	0.0864773	1.44667	1.09529	-0.257926	1.86645	97	-0.527629	0.264437	-2.03309	0.947346	-1.09146	0.382271	0.215977	-0.674923	-1.06045	-0.145237	0.743485	0.108227	0.716235	-0.195104	-1.22621	0.116276	-0.965704	1.82983	-0.616009	-0.280154	-0.252744	1.42555	-0.304124
98	0.0591796	-0.0740382	0.12276	2.39466	-0.334142	2.24746	-0.273159	0.498739	1.3505	0.084095	1.07753	0.501739	-0.856179	-1.04484	1.5317	-0.310976	-1.17286	0.966976	-0.43671	0.566186	-0.902136	98	-0.0567679	-0.0164338	-1.30947	2.14233	1.12878	0.317172	0.443839	0.601385	-0.495583	1.34809	1.55361	-0.413142	-0.195089	0.331581	-0.280712	-0.124761	-1.06394	0.14403	0.515201	-0.279363	0.978741	1.8441	1.02321
99	2.16037	-1.0575	0.155641	1.09492	-0.367397	2.97984	-2.42586	-1.81266	0.786516	-1.72301	-0.552067	2.21181	0.858128	0.368986	0.286904	0.952881	-0.0618116	-0.271006	-0.147247	-1.27063	0.722916	99	-1.07224	-0.661592	-1.36953	0.431213	-2.27687	0.297412	1.21547	0.291718	0.406048	-2.21266	2.90006	-1.84916	-0.532035	-0.931541	-0.964372	0.342183	-1.18831	0.29698	-0.239187	0.644021	0.721511	1.7954	-0.184725
100	2.46361	-0.32175	-0.498397	0.294767	-0.387297	1.66454	0.126599	1.22433	-0.219465	0.99192	1.52869	0.257194	-1.30381	1.42701	-0.974543	-1.8657	0.426476	-0.15702	0.450334	-0.534758	0.824424	100	-2.08398	0.556215	-2.27061	0.625198	-1.57675	-0.821296	0.522019	0.231397	0.476676	-1.95189	2.05254	-3.1284	-0.578552	-0.619148	-1.76652	0.166309	-1.82215	0.212968	1.39829	1.96433	0.133714	0.555506	-0.664711
101	2.15745	0.174646	-0.0129137	0.890976	0.0824135	2.67759	1.1839	-1.26593	-0.230064	0.379296	0.443605	-0.48598	-0.00157937	-1.185	0.843143	0.408085	0.0981427	0.192541	0.364059	0.35808	-0.655163	101	-0.76216	-0.452181	-0.13742	1.90474	1.28783	1.27375	-2.59497	0.601781	0.365981	-0.418068	-0.87419	1.51462	-0.75704	-0.671847	0.027926	0.292366	-1.3909	0.983986	-0.803941	1.99385	-1.55522	2.99111	0.735112
102	1.6846	0.826431	-0.78345	1.57929	0.767294	1.27081	-0.115082	-1.21556	-0.892263	-0.22009	0.869635	-1.03736	1.54617	-0.391364	2.02121	-1.40409	1.03991	-0.610709	1.04779	-1.00432	-0.226421	102	0.0382178	-0.845991	-3.21265	0.659226	-0.0563752	0.537546	-1.08953	-1.15359	0.721451	1.25016	0.0274501	0.0242052	1.92124	0.258932	-0.955894	0.399398	0.730288	0.368685	-0.840066	2.23319	-1.07433	-0.651539	2.06307
103	2.08443	0.951601	0.874534	2.25774	0.898793	1.88766	0.376013	1.27748	-0.351493	1.987	0.519284	-3.50962	-0.359187	0.417078	0.215168	0.0261684	0.667425	1.10362	1.48559	-0.795394	-1.46406	103	-0.109524	0.0533258	-1.63566	1.78029	-2.55975	1.06716	-0.365181	-0.462714	-0.28166	-0.945995	-0.793708	0.115451	-1.87148	-0.1173	-0.020283	-0.232741	-1.6924	0.196047	0.0280258	3.22922	-1.05452	0.878608	1.72265
104	-0.128393	-0.340866	-0.634656	3.40219	-0.554145	-2.32999	0.57277	1.37888	-0.338563	0.385325	-0.186807	0.750941	0.427681	-1.63743	0.973989	-0.904401	-1.01061	-1.69699	1.56363	-1.03428	0.794647	104	0.116318	-0.210817	-2.16539	0.406552	-0.105159	-0.569636	-0.0157651	-0.588825	0.209458	0.326584	0.152456	1.30679	0.073665	0.278105	0.0806181	-0.489	-0.304025	0.318747	-0.097094	2.63895	-0.993643	-0.342771	-0.750597
105	1.7456	0.684388	-0.758902	0.523147	-1.04859	-0.173616	-0.375623	-1.29438	-0.362988	-0.332248	-0.134341	-0.62277	0.357573	0.233183	-0.95254	-1.09943	1.78515	0.608893	0.012437	-0.325348	0.380377	105	0.84812	-0.8744	-2.789	0.637523	-0.630064	0.822213	-0.212992	0.181757	-1.17525	-0.953184	2.88189	-2.19396	-0.0679663	0.546435	-1.22227	0.255855	-0.705906	-0.09993	-1.26753	-0.417227	0.00432285	-0.191811	-0.462074
106	1.75099	-0.229855	0.59982	2.10602	-0.203981	-1.26083	0.0864284	0.248055	-2.06769	0.954628	0.303867	-0.569863	0.721892	0.764468	1.29765	0.193584	-0.753271	0.910619	0.949063	0.554394	0.534975	106	-1.05137	0.251542	-1.8193	2.79885	-0.13799	0.223744	-0.458173	-0.293063	0.905266	-1.24255	-1.51609	2.49766	0.577582	0.157028	0.611623	0.713684	1.60622	-0.294584	-0.695934	1.15913	-1.06209	1.51412	-0.102155
107	0.529795	-0.122883	-0.705108	1.5569	0.253456	-1.13223	-1.67375	-2.20791	-0.700855	-1.4073	0.527347	-2.72325	-0.885152	0.109001	1.8708	-0.550695	0.551729	-0.017181	1.03327	-0.609003	0.743789	107	0.835056	-0.944557	-3.17	1.22355	0.582719	0.548943	-1.27091	-1.93902	-2.02355	-1.93616	-0.381712	-3.54273	-0.159267	-0.00843376	-0.80004	-0.601314	0.995719	0.84981	-1.35809	2.35377	0.199194	-0.664664	1.03889
108	1.27058	0.919939	-0.509844	0.0804518	-0.1341	2.80186	1.32213	-0.216439	1.35595	0.207191	-1.94597	1.69196	0.875283	-0.75209	-0.2091	0.41476	-0.389132	-0.551873	1.63715	0.109108	1.26267	108	0.379517	1.0473	-0.865344	0.896221	-1.08388	0.640658	-0.171946	-0.92818	-1.50846	-2.25785	0.445463	-3.01459	-1.91431	0.318259	-1.24178	0.186795	-1.27172	-0.391422	0.751599	-1.61302	1.31631	1.68719	2.28208
109	1.57515	-0.488358	1.20609	1.21782	2.06155	-0.56207	-0.720513	0.030584	1.47574	0.900101	-1.41991	0.529153	0.483483	-1.8124	0.231503	0.0251959	0.907793	0.114517	0.447454	-0.438906	0.913651	109	-0.142994	0.585572	-1.50278	1.25593	-1.5093	1.77351	-1.13868	-0.991409	-0.333197	-1.90795	1.82765	2.11224	-0.542019	0.944585	-2.66582	0.432248	-0.770496	-1.37407	0.619972	1.15624	1.11671	0.608624	-1.08027
110	1.81672	0.192398	-0.787092	0.914586	0.761996	-1.21625	-2.51606	0.253877	0.0424384	1.70177	-1.06233	0.0335597	-0.650997	-0.673392	0.300989	0.256893	1.63862	-1.78007	0.758781	1.79763	0.601473	110	0.330801	0.496057	-1.46977	-0.429015	1.23428	-0.164603	-1.66146	2.17753	-0.640312	-2.33127	-0.831341	-1.72213	-0.389943	-0.471279	-0.56958	0.264767	-0.0957384	1.29981	-0.621448	1.95921	-0.756112	1.62296	2.10622
111	-0.868965	0.0681222	-0.177526	2.67408	-5.99967	3.98657	-0.856905	-1.72087	-1.16667	-1.08971	-0.256996	-0.321822	-0.393811	-1.3657	-0.0215937	-1.17022	1.03575	-2.14327	0.0942534	-0.813065	-2.32511	111	1.10683	-1.34862	-1.29388	1.47126	0.182769	0.257002	0.909119	0.815419	0.191153	-0.825057	1.14639	-1.03109	0.421729	0.725232	0.572625	0.184862	-1.7497	-0.758619	-2.0779	0.583822	-0.998756	0.670387	1.99721
112	-1.34678	-1.34261	-1.13297	1.30598	1.48874	-0.740806	0.131155	-0.682345	-0.198133	1.0097	0.180237	1.41342	-0.291199	0.635533	-1.32742	-1.21036	-0.664046	-0.195638	1.3329	-1.59978	-0.35779	112	0.877358	0.264897	-1.50057	0.35	-2.31933	-0.625775	-1.06939	-0.757995	0.336349	-0.924163	0.7595	0.160775	-3.28779	0.384093	0.220043	-0.377546	0.0955081	0.445215	1.05469	0.410859	-1.75763	-0.518519	1.03603
113	1.22729	-1.19698	-1.0216	2.00536	-0.310094	3.59142	-1.84799	1.29016	-0.0101306	1.04546	0.324972	-1.086	-0.58974	-2.48591	-0.198471	-0.306953	-0.120553	-1.2059	0.705866	2.42419	-0.337271	113	-0.921518	0.223763	-1.72966	1.08846	-0.490942	0.415433	-1.48861	0.598475	0.8672	-1.63249	0.549239	-1.04337	0.30545	-0.982192	1.1953	0.434375	-0.886503	-1.41195	0.854385	0.600635	-0.340861	1.82729	0.621718
114	-1.36981	-0.683532	-0.543529	-0.038596	-3.13086	2.81064	-0.557443	-1.27034	-2.01369	-1.26781	-1.64309	-0.959585	0.676212	-1.44346	-0.68136	-1.10536	0.85581	-0.00398056	0.424183	-0.561521	-0.356143	114	-0.214641	0.699273	-3.21852	1.45685	-0.544446	-1.07323	0.102676	-0.224734	-1.91251	-1.79645	-0.0754565	-0.794084	0.378927	-1.13697	0.17245	-0.431318	-1.7215	0.697478	-0.591587	0.742774	0.14657	1.12099	1.69103
115	-0.471761	1.09052	0.102787	1.98336	0.875336	-0.52852	-0.374199	-0.694629	-0.075248	1.14418	0.229526	-0.35263	-0.138788	-1.64879	1.02591	0.301262	-1.24899	-0.691211	-0.898115	-0.675971	0.0818573	115	0.563822	1.36146	-1.30273	-0.20319	-0.591939	0.353711	-0.850868	0.218112	-0.331213	-0.995095	0.896566	2.22144	-0.962127	-0.89598	0.890485	0.453306	-1.4333	-0.115382	-2.35765	1.06794	0.147824	1.43241	0.781485
116	-1.21153	0.79676	0.647867	0.627958	0.193907	0.519233	0.671774	-1.84786	-0.338272	-0.482501	1.51023	-0.622367	0.698035	-2.30676	1.47553	0.149399	0.800835	0.448529	0.340664	-0.482397	0.88819	116	-0.251607	-1.49058	-1.12075	-0.123642	-1.31503	-1.06168	0.137575	2.11297	-0.350968	0.340406	-0.0456405	-0.410261	-0.0801813	0.608172	0.83385	-0.213374	-1.24542	-0.386591	-0.337181	1.67203	-1.36413	1.599	2.31535
117	1.59484	0.227922	0.0782837	0.943017	0.997507	3.14713	-0.20907	0.350561	1.16785	1.72317	-0.486067	-0.204433	-0.926726	0.551336	-0.327542	-0.0613201	0.0320728	-0.196148	1.53879	-0.292215	0.547445	117	-0.563199	0.198758	-0.79466	0.506639	-3.2336	1.88879	-0.20201	0.436784	1.06718	-0.247716	-0.438166	0.48476	0.788091	-0.305108	0.791241	0.0592938	-0.163957	-0.0430236	-0.0287634	2.14425	-0.781004	1.16483	0.867319
118	-0.511042	1.05144	0.509406	0.523404	-2.99352	-0.0111801	0.457165	-0.0146922	-0.62525	0.1825	1.53686	0.766359	1.6223	-1.00619	0.747083	-0.354966	-0.13313	0.0865102	0.124976	-0.440802	-0.874924	118	0.480441	-2.04259	-1.07612	0.513348	-1.14592	1.1666	0.594911	-0.911753	-1.45455	0.0874639	-0.129653	0.768845	-0.0515634	-0.0892634	0.733334	-0.0630902	-1.72977	-0.223533	-0.600675	1.63306	-0.176275	1.19367	2.67576
119	2.38547	-0.0446269	-0.244303	2.13862	1.77972	-0.501166	-1.19656	-1.00997	-0.576468	1.60189	-1.42711	0.260803	0.556102	0.746817	-0.277708	-0.589959	-0.40855	-0.284383	-0.606117	-0.117724	-0.913292	119	-1.27551	0.0296032	-1.32715	0.496955	-1.25423	1.80243	-0.200628	-2.45587	-0.642287	1.1493	-0.473754	2.09922	1.47329	-0.2856	-1.43317	-0.235287	-0.987685	0.450125	0.890864	1.87923	0.179426	2.02114	2.01137
120	0.123818	0.582117	-0.104115	1.81908	1.73871	4.17195	-0.559392	-2.10628	-0.563046	0.125376	1.75558	-0.0837826	-0.13899	-0.818061	0.528718	1.70502	-0.619539	0.367943	1.32113	-1.03831	-0.473666	120	0.251187	-0.346652	-2.17783	-0.48974	-0.604485	0.257022	0.648304	1.38418	1.0009	-3.22495	-1.89555	-0.676432	1.35955	0.158916	1.73619	1.22624	-1.57087	1.49132	0.146337	-1.09972	-0.681612	1.50241	0.635689
121	0.382349	1.11285	0.443475	0.10526	-4.17471	1.62447	-1.46393	-0.751946	-1.0333	0.737672	1.6022	-3.51328	1.13941	0.844885	-0.288573	-0.237475	0.199061	-0.664885	0.315989	0.507522	1.93138	121	1.42674	0.509196	-0.227368	0.092268	-0.950524	-0.0800936	-0.458203	-1.60594	-0.104161	-2.83028	2.27802	0.646286	-0.228655	-0.217008	-1.23853	0.025486	-0.670061	-1.05106	-2.83935	1.68678	-1.14882	3.79729	0.582335
122	0.12358	0.653309	-0.03634	0.439692	2.34717	-1.45935	-2.46529	-0.277462	1.15562	1.90673	0.383216	-0.0380266	-2.27826	-0.641452	-0.0452947	-1.3328	0.498963	-1.6583	2.00344	-0.374541	0.613463	122	0.567242	-0.700294	-1.53121	0.64001	-1.10168	1.81247	-0.254295	-0.786532	0.345336	1.03626	-3.21717	1.57791	0.0793611	0.706246	-2.09043	0.175088	-0.101511	-0.0782353	-1.30335	1.63133	1.37489	0.998011	-0.528716
123	-1.74617	-0.826248	0.851801	-5.26459	2.74289	2.68461	1.03432	-0.567644	1.19909	-0.812956	1.70037	-0.321195	-0.866475	-1.47301	0.00592005	-0.837969	-0.662057	0.0611955	-0.660101	-1.15311	0.670806	123	-0.288933	0.421353	-0.766132	0.0358627	-1.98674	-0.815334	-0.00565328	-1.45542	0.634217	1.38739	1.36974	-4.1176	0.274028	0.270353	-0.457362	0.248873	-0.944298	0.653996	-0.605601	1.12652	1.08235	3.35694	0.453796
[truncated: 377 more rows]

## Sheet: Fig 6G-J
Source Data	Figure 6G-J	AWC & ASH VGLUT-pH data: Tau values from single exp fits and axon intensity measurements
		plus supporting statistical analysis
	Tau (secs) Fig 6G							Tau (secs) Fig 6H							Axon FL. (a.u.) Fig 6I							Axon FL. (a.u.) Fig 6J
	AWC wt	AWC unc-11						ASH wt	ASH unc-11						AWC wt	AWC unc-11						ASH wt	ASH unc-11
[truncated: 44 more rows]

## Sheet: Supporting Stats Fig 6E,F
Source Data		Supporting Statistical Analysis for Fig 6E,F
[truncated: 50 more rows]
