# Supplementary material for: Diverse modes of synaptic signaling, regulation, and plasticity distinguish two classes of C. elegans glutamatergic neurons
Source: eLife. 2017 Nov 21;6:e31234. doi: 10.7554/eLife.31234 (PMC5705214; doi:10.7554/eLife.31234)
Supplement: Figure 7—source data 1. [file elife-31234-fig7-data1.xlsx]

## Sheet: Fig 7A
Source Data	Figure 7A	AWC VGLUT-pH data: individual dF/F(%) traces						This dataset contains wt data from Fig 7E
		Three trials per animal: Read from left to right; Trial 1 signifies a new animal
		Acquisition Rate: 5 Frames/sec
		Pulse 1		Pulse 2
		Stimulus ON:	Frame 150	Stimulus ON:	Frame 525
		Stimulus OFF:	Frame 450	Stimulus OFF:	Frame 625
	wt VGLUT-pH
Frame / Trial #	1	2	3	1	2	3	1	2	3	1	2	3	1	2	3	1	2	3	1	2	3	1	2	3	1	2	3	1	2	3	1	2	3	1	2	3	1	2	3
1	4.24995	2.03196	1.70058	3.2448	3.60194	2.53545	2.58243	1.57465	1.42148	1.95273	1.49812	1.75043	1.72613	1.86362	3.40148	2.98155	3.44079	3.06313	4.78422	3.57894	3.58983	1.97021	1.76687	1.92962	3.78655	4.7951	4.22095	5.46159	6.23803	5.2078	6.94502	6.56054	4.82425	5.02802	4.82407	3.02365	2.48264	2.20893	0.849697
2	4.3023	2.32169	1.8073	4.06935	3.30074	2.49526	2.34259	1.72438	1.66248	1.45503	1.72333	1.40087	2.01159	1.36397	3.11073	3.32459	3.0231	2.61989	5.8414	4.28067	3.82578	1.88477	1.63828	1.72172	3.08005	3.85111	3.96727	4.36391	5.9321	5.07386	7.25915	5.17251	4.3643	4.4439	4.46165	1.525	3.36138	2.83903	1.55784
3	3.87953	2.05848	1.87103	3.55748	3.14123	2.43765	2.32563	1.653	1.33811	1.73282	1.33823	1.56488	1.50248	1.57152	3.75382	3.30441	2.89199	2.52009	3.71484	2.12768	3.19911	1.46439	1.50216	2.09279	3.64093	4.11311	3.97871	4.76554	3.7789	4.11796	7.29925	6.34154	5.03114	2.61882	2.60175	3.32273	4.1536	3.04963	1.84952
4	2.71319	1.68082	1.80644	3.52604	3.16745	2.41564	2.5089	1.98715	1.62107	1.81384	1.35622	1.72456	2.09207	1.64733	2.6458	3.05419	3.049	2.7995	3.78899	2.59126	3.74714	2.23598	2.31237	1.3272	3.71588	3.50253	5.31143	4.74352	3.95007	4.65078	8.44943	5.60254	4.44423	4.57471	3.95611	2.33408	2.85838	1.54018	-0.673484
5	3.01587	2.00371	2.35281	3.43293	3.13901	2.43838	2.76855	1.19948	1.01299	1.55553	1.26904	1.32611	1.73942	1.61586	3.00831	2.72143	2.89911	3.20254	4.71657	4.55562	2.84316	1.59648	1.90651	1.59856	3.41556	4.10822	3.95771	4.20537	5.34331	4.11523	6.58358	6.77031	5.07616	3.51775	3.7667	4.23059	4.01905	2.05143	1.17006
6	3.66021	1.72745	1.80749	2.93871	2.86725	2.66338	2.16095	1.43311	1.50221	1.75458	1.68014	1.38867	1.36109	1.48061	2.9044	3.10105	3.0573	2.66721	5.38236	2.59044	3.29855	1.80348	2.03815	1.57177	3.63879	4.8483	5.01398	5.3318	5.36385	3.96781	8.03866	6.64343	4.82818	3.54837	5.17463	2.77702	2.85624	1.20754	1.54595
7	3.70138	1.7031	1.48127	3.2644	3.00021	2.4121	2.50069	1.72426	1.37191	1.56008	1.31262	1.74804	1.72471	1.35473	3.17478	2.74387	2.76689	3.0401	4.50446	2.32392	3.25506	2.03631	2.06805	1.69012	3.19633	5.00581	4.95361	5.14154	5.33618	3.77501	8.32759	5.92371	4.36168	4.5251	4.77412	2.84253	2.99742	2.32147	0.579957
8	3.61751	1.98959	1.41173	2.86416	3.06937	2.74558	2.36496	1.56694	1.81416	1.73677	1.3082	1.89308	1.84754	1.64433	3.24275	2.83573	2.95637	2.80675	4.32039	3.17331	4.09519	2.37333	1.98768	1.72869	3.6925	4.8181	6.40944	5.02447	5.76131	5.43988	7.13419	5.89432	5.10339	4.6073	4.59612	1.86512	2.50048	2.64349	1.91035
9	3.48621	2.28395	2.05426	2.63448	3.01151	2.59756	2.62521	1.68704	2.10106	1.58263	1.16763	1.53459	1.93672	1.7162	3.40417	3.23721	2.91645	2.97448	3.64637	4.73823	4.0732	2.03579	1.70788	1.69847	2.23186	3.58098	4.67184	5.40895	4.78932	4.99664	7.52585	5.56104	5.20642	3.93818	5.34633	3.22093	2.55268	1.96134	1.64782
10	NaN	1.84713	1.4745	2.89863	3.13573	2.68834	2.52829	1.83708	1.49461	1.38416	1.47358	1.59815	1.96806	1.42506	3.22772	2.78361	3.33682	2.73136	4.10144	4.51951	2.89595	1.93266	2.32817	1.81344	2.75107	4.99832	5.20384	5.07813	5.17527	4.02854	7.09662	6.87473	5.64015	4.15133	4.20419	2.01269	1.823	2.05311	1.76087
11	3.50207	1.80944	1.51177	2.85727	3.0811	2.02856	2.36957	1.51206	1.47985	1.4594	1.48641	1.58832	1.66792	1.25095	3.27452	2.59287	3.53116	2.74175	4.30973	2.30833	2.41873	1.87036	1.96761	1.58872	3.18222	4.29468	5.01647	3.67994	4.86024	4.69928	7.2298	4.9351	4.14733	3.79233	3.79556	3.44932	2.98032	1.64233	1.83683
12	3.41637	2.05333	0.863972	2.9894	3.0905	1.98988	2.37092	1.6267	1.5381	1.3156	1.54986	1.54629	1.70925	1.77012	3.58223	2.63358	3.13639	2.76217	4.26005	1.62446	3.5194	2.20235	2.07843	0.683521	2.3618	4.70299	4.50335	4.64385	6.00044	4.86914	7.54012	5.51174	4.97448	4.71483	3.36955	1.96506	2.81785	2.36713	0.452266
13	3.35965	1.92009	1.5659	3.69181	2.94301	2.51629	2.27571	1.42716	1.59925	1.56297	1.3768	1.34112	1.89846	1.508	3.44729	3.12896	3.0631	2.86751	3.79848	2.01785	3.28121	1.82678	2.00612	1.31104	3.35143	4.46461	3.85734	4.47371	5.5668	5.16564	7.87928	6.02056	5.06641	5.03105	4.61979	2.48555	3.15098	2.86786	1.67507
14	3.53972	0.986614	1.68106	3.02859	3.53509	1.92574	2.40784	1.63246	1.52632	1.08231	1.07486	1.72114	2.06487	1.42209	3.18979	2.87775	3.42669	2.72738	4.28196	3.28978	4.69335	2.10786	2.3094	2.2901	2.70776	4.7672	3.95858	5.45786	5.53995	5.38499	7.96482	6.43533	5.51327	5.86508	3.05996	2.8636	3.58073	0.859166	0.355323
15	3.22772	1.66175	0.602042	3.22246	3.39494	2.71724	2.38802	1.82404	1.92802	1.60777	2.02545	1.34322	1.8523	1.64474	2.89358	1.81694	3.20581	2.92494	3.97428	3.06605	2.68018	2.60701	1.97382	1.91725	2.8972	4.14567	4.95801	4.35766	4.97166	4.87675	7.36148	6.54588	5.1677	4.04848	3.14695	2.95925	3.50192	2.48636	1.27635
16	3.61039	1.73621	1.3939	3.16294	2.76705	2.11515	2.27905	1.99293	2.13354	1.43946	1.87145	1.40433	1.6646	1.58319	3.39755	2.80287	3.17647	2.76565	5.46974	2.34212	3.39994	2.22372	2.66851	1.8038	2.94025	4.0605	4.7529	3.90986	4.48228	4.33178	7.97153	5.9445	4.28226	4.38453	1.63935	2.05262	2.78163	2.69631	1.88162
17	3.51264	2.01009	1.32453	3.11365	3.01748	1.59759	2.1566	1.661	1.47864	1.43731	1.41362	1.53212	1.56296	1.12934	3.08882	2.85747	3.19347	2.75318	4.81081	2.11146	3.73555	1.58574	2.80426	2.18047	2.83188	4.56767	4.16633	4.74545	4.77337	5.91606	8.55819	5.57199	3.86592	4.93445	4.39755	3.05799	2.95663	1.46711	1.17858
18	NaN	2.25217	1.25189	3.20742	3.14783	2.64109	2.31536	1.5865	1.41776	1.59995	0.798295	1.40485	1.57985	1.45357	3.49193	2.56154	3.33445	2.79545	3.68739	3.1059	3.98566	2.18939	2.0309	1.87767	2.68868	5.14785	3.91298	4.39214	5.20988	4.93253	7.20948	5.75409	5.75809	5.01233	3.52265	1.7155	3.69863	1.05283	1.81415
19	3.05254	1.74248	1.56593	2.95297	3.01328	1.81561	2.37517	1.57736	1.53947	1.81712	1.56518	1.31429	1.82903	1.55016	3.43539	2.19198	3.17404	2.94643	4.48317	4.04198	2.7239	2.42243	1.85832	1.30221	2.65596	3.70594	4.48557	3.86545	6.22142	4.9832	7.35507	6.48456	4.87559	4.67014	5.24222	2.5829	2.9827	2.65328	2.28451
20	3.65403	2.21053	1.15143	3.11018	3.31169	2.69676	2.11081	1.72357	1.61833	1.38971	1.23402	1.47263	1.68594	1.2177	3.01813	2.83176	2.70695	2.75938	4.65444	3.28906	2.98702	1.78062	2.32768	2.0966	2.6907	4.34722	3.90567	4.53814	5.20717	4.1348	7.71999	6.7131	5.30501	4.56105	3.3267	2.96448	1.92806	2.54858	1.3418
21	3.25106	2.05074	1.53108	2.85445	2.91815	2.09777	2.21585	1.4748	1.57652	1.80521	1.77299	1.53102	2.11209	1.99278	3.34414	2.89412	3.42361	2.91373	5.18281	2.22996	3.36966	2.17873	2.02921	2.01282	3.32449	4.59971	4.41552	5.51053	5.09345	4.85301	7.59982	6.13854	5.17598	4.303	4.2764	2.87162	3.35542	1.71444	2.09836
22	2.84281	1.99016	1.41126	3.30127	2.43839	2.22614	2.10433	1.56126	1.39775	1.5892	1.37597	1.83462	1.22823	1.54934	3.10177	2.63637	2.76541	2.96176	4.90875	2.72653	5.05814	2.42807	1.99923	1.38263	2.73509	3.40342	4.60049	4.97991	4.53485	5.79572	8.17658	4.62298	4.99827	4.33301	4.09869	2.98722	3.25663	2.19503	0.227746
23	3.20232	1.96955	1.07325	3.8929	3.0969	1.67971	2.36001	1.45529	1.48757	1.54928	1.47543	1.71907	1.92419	1.30637	2.90616	2.11758	3.07999	2.62589	4.78323	4.25382	3.12407	2.68752	1.09971	1.89271	2.22289	4.23317	5.11752	3.05442	4.80274	4.84053	6.58516	6.05412	4.63968	3.58118	3.13577	2.83124	3.14711	1.71687	1.74344
24	3.0834	1.65547	1.26985	3.43199	2.90904	1.53312	2.53668	1.51369	1.2433	1.17431	1.70694	1.53747	1.96086	1.67788	3.02663	2.47123	2.7688	2.77737	4.22974	3.04014	3.70388	1.90714	2.51131	1.91738	3.17099	4.46043	3.81709	3.42115	4.94443	4.51526	7.73835	5.43771	5.06694	4.94577	3.82108	1.74716	2.92953	2.10488	1.77605
25	3.43712	2.20002	1.25873	3.14486	2.76197	2.02321	2.28596	1.61651	1.39348	1.40629	1.58992	1.66921	1.79165	1.25389	3.31649	2.37395	3.27505	2.85826	5.24513	1.74496	2.89601	2.66886	2.63096	2.30491	3.13655	4.46831	4.42548	4.176	4.42602	5.398	6.39371	5.74731	4.58594	4.60011	4.35854	3.38799	4.75108	2.71598	0.207719
26	2.6363	2.12658	1.5885	3.90368	2.74951	2.52249	2.36031	1.45564	1.72392	1.62378	1.58632	1.54715	1.84003	1.36094	2.93655	2.27485	3.18954	3.00943	4.25001	2.38544	3.2244	2.4036	3.05944	2.05826	2.92399	5.4608	4.25046	4.32164	4.04227	5.43513	7.41472	5.88258	5.65861	4.22984	5.10004	3.41848	3.28477	2.24159	1.81141
27	2.99174	2.10346	1.39242	3.78078	3.16237	2.61378	2.76896	1.68449	1.16881	1.60696	1.42732	2.10017	1.72603	2.00008	3.20806	2.4177	2.61014	2.28148	4.49775	3.54654	4.09079	2.51961	2.86666	2.0519	2.96485	5.1114	3.40726	4.11384	5.57258	5.77419	7.5733	6.15225	5.95116	2.68028	4.12324	3.07384	4.01705	0.161367	0.347713
28	3.20575	1.84937	1.86707	3.08868	2.7231	2.52286	2.35634	1.42299	1.52501	1.25824	1.33928	1.44562	1.94387	1.71678	3.36706	2.60191	3.38338	2.96544	5.67153	4.47251	4.37846	2.18462	2.93377	1.72686	2.52265	4.59624	3.56907	3.49306	5.20735	5.66944	7.26171	5.82709	5.09154	4.45535	2.97436	2.12575	4.19371	1.78432	1.84245
29	3.81792	1.99988	1.48441	3.13629	3.16985	2.3843	2.56812	1.49812	1.39865	1.47764	1.26969	1.61139	1.53145	1.6038	3.1442	2.67536	3.37274	2.53607	4.24458	3.9416	3.09567	2.0052	2.79964	2.46082	3.10263	4.70703	4.01087	4.75832	4.94513	4.32754	7.33147	5.03357	5.27445	5.1041	4.26654	2.46818	3.45724	2.24672	1.71969
30	NaN	2.12851	1.81171	2.86176	3.08755	2.40981	2.17795	1.77164	1.412	1.36428	1.22423	1.66649	1.60919	1.57705	3.31497	2.5063	3.29818	2.95031	4.1708	3.19869	2.91022	1.96566	1.92295	2.21564	3.59161	4.88022	3.56103	3.78192	4.56158	5.59676	8.69424	6.42392	5.80859	5.11425	3.94041	2.84966	3.13971	0.437936	1.79441
31	3.27181	1.95472	1.24161	3.34265	2.80632	1.75463	2.40665	1.71632	1.50636	1.50505	1.76417	1.55628	1.72703	1.68049	3.03299	2.53388	2.94728	2.58701	4.97651	2.68176	3.99111	2.31308	2.27164	1.67368	2.38806	4.41783	4.21618	4.67548	3.74226	5.27854	6.91301	5.66763	4.1066	4.34365	3.79972	3.69181	3.8465	1.18442	1.17966
32	3.03171	1.87587	1.53348	3.41046	2.78375	2.58364	2.22385	1.26912	1.65525	1.4492	1.6322	1.76971	1.66968	1.63908	3.192	2.59003	3.11378	2.5575	4.0062	4.17237	2.91279	2.12622	2.71845	1.9345	2.87385	3.93896	5.02943	4.56499	5.02951	4.52708	7.27677	6.07205	5.52466	3.90026	3.54169	2.30815	3.97993	3.19166	2.13333
33	3.38306	2.25667	2.01209	3.17884	3.15443	2.76275	2.42689	1.47036	1.35986	1.27814	1.22481	1.69494	1.5368	1.36414	3.17649	1.53406	3.17213	2.58896	4.5963	4.04799	3.23478	2.28989	2.60249	1.698	2.69649	4.25935	3.81829	3.32208	5.29984	4.20101	6.87441	5.6591	5.70352	3.57428	3.97546	3.11081	4.1757	1.38872	1.33238
34	NaN	1.68781	1.51874	3.41812	3.24157	2.3476	2.55481	1.47213	1.44511	1.56579	1.17565	1.73893	1.96896	1.37832	3.3874	2.14442	2.84853	2.8363	3.79552	3.85295	2.77503	2.33894	2.17695	1.34357	2.61155	4.37287	4.68754	4.14281	4.99715	4.98239	7.16176	5.24197	5.6142	4.92875	4.2299	3.86519	3.69121	2.40968	-0.434954
35	NaN	2.15701	1.1287	3.70617	2.76953	1.33153	2.32028	1.46207	1.39961	1.40312	1.19359	1.73009	1.6696	1.99403	3.025	2.34058	3.12067	2.79106	4.1644	3.35518	3.00397	2.76357	2.5358	2.1882	3.42369	3.92513	5.10533	2.76154	5.13607	5.31877	7.70311	5.91206	5.0324	3.86982	4.7297	2.78943	3.59311	3.04568	1.46405
36	3.31202	1.34975	1.45059	3.49452	3.11106	2.53108	2.33871	1.32841	1.21102	1.61232	1.63657	1.67111	1.55273	2.11067	2.85638	1.88408	3.00512	2.82606	3.14707	3.92666	0.942133	2.45523	2.23028	1.88164	2.5836	2.96176	4.51036	4.4458	4.79372	4.6091	7.9396	6.36412	5.25123	3.82073	3.70008	2.87817	4.2004	1.93087	1.50213
37	NaN	1.89941	1.59719	2.88432	2.80716	1.58971	2.49335	1.6222	1.50481	1.47996	1.43162	2.05134	1.88924	1.41285	3.41594	2.51702	3.3612	3.03539	3.9912	1.82543	1.63009	2.25795	3.18754	1.65683	3.76034	4.69324	4.91492	3.10447	6.08047	4.57871	7.71107	3.44978	5.81145	3.8915	3.29082	3.26849	3.52621	1.33419	2.5672
38	2.83277	2.27971	1.55743	3.14936	3.43831	2.30851	2.55354	1.49799	1.40148	1.55799	0.572029	1.87482	1.57723	1.471	2.54095	2.38927	2.88257	2.46853	3.46634	3.06687	3.64414	2.60886	2.09593	2.39446	2.61274	4.43661	3.96497	4.03697	5.38668	5.03361	7.42832	6.5841	6.16423	4.70467	3.73172	3.62124	3.65969	2.60776	1.65955
39	3.24667	2.62933	1.72166	3.51945	3.06614	2.36558	2.21508	1.30628	1.15987	1.72327	1.67528	1.58304	1.59552	1.76528	3.71584	2.22531	3.16009	2.81123	4.83724	4.38065	2.08068	2.26579	2.7816	2.02397	2.54182	4.84889	3.6959	3.84828	5.78031	5.15957	6.42507	6.0186	5.55785	3.25489	3.45873	3.29966	4.5132	2.10529	0.593076
40	3.47601	1.93186	1.58319	3.232	2.70267	2.13864	2.34944	1.6755	1.47259	1.69935	1.60543	1.5923	1.49405	1.73403	3.29579	2.38919	2.40959	2.96394	4.8704	4.19463	3.61959	2.76109	2.90338	1.74023	1.7925	4.95271	4.38664	2.59747	5.14989	5.71903	7.80612	5.59251	5.37877	4.10016	4.37626	4.34841	3.89233	3.06817	2.07621
41	2.95669	2.26774	1.57708	3.05338	3.16109	2.24723	2.34114	1.6049	1.47716	1.45522	1.40002	1.7946	1.56632	1.7881	3.37267	2.75141	3.05845	3.17786	5.2544	4.46517	4.2209	2.81455	2.4658	2.31205	3.79937	4.06779	4.10051	3.43591	4.65041	4.02645	7.66653	6.05766	5.59838	3.19608	4.20403	3.76131	3.59151	2.48249	1.20362
42	3.20885	2.52981	1.49894	3.33411	3.21998	2.46522	2.58239	1.81858	1.6139	1.49402	1.22042	1.76056	1.57761	2.00563	3.51665	2.78466	2.7278	2.1976	4.63361	2.67286	3.37687	2.49161	3.05905	2.14163	2.77684	3.64563	4.81233	3.57614	4.79183	4.98951	8.30671	5.54719	5.78488	3.132	3.60115	3.46537	2.5234	1.88535	1.76428
43	2.73816	2.45157	1.49347	3.55593	3.1059	2.53087	2.47759	1.4308	1.21291	1.69993	1.47496	1.89533	1.95696	1.59801	3.30857	2.31292	3.39536	2.76625	4.01226	3.35938	3.59513	3.21575	2.7404	2.3379	3.28167	3.86442	3.69754	4.12288	4.82689	5.56871	6.80192	6.49476	5.58835	5.08634	2.90794	2.09863	3.17904	0.923134	0.955493
44	3.09251	2.15165	0.730527	3.44887	2.72704	2.2652	2.30678	1.75225	1.2292	1.30188	1.38513	1.87334	1.45281	1.52763	3.43727	2.20698	2.54078	2.93265	3.54429	4.23439	3.40413	2.05767	2.23209	2.09687	3.27896	4.0359	4.34251	3.59176	5.22061	5.59072	7.3665	6.63269	5.25817	3.58923	3.29095	2.3293	3.6041	2.10496	0.95463
45	3.37756	2.22461	2.30373	3.51413	3.2381	2.16377	2.39261	1.29249	1.5444	1.30145	1.33131	1.64576	1.05457	1.51002	3.58052	2.53827	2.75407	1.90042	4.1832	3.90456	1.38458	3.2146	2.68431	2.467	2.18943	3.77166	4.64411	4.10975	4.56079	5.21292	7.6558	5.60814	5.62331	3.97901	4.1764	3.30576	3.89949	2.81646	0.443588
46	2.6109	2.25748	1.1745	3.5867	2.90886	1.5355	2.62227	1.45883	1.36949	0.99919	1.68237	1.95924	1.06819	1.58685	2.9663	2.54021	3.08981	2.55497	4.31792	3.19951	3.63633	2.09894	3.16976	2.8578	2.54606	3.69939	4.64537	4.07666	5.93076	4.73613	6.72118	5.73751	6.0269	4.86509	4.14554	3.343	4.9936	1.66037	1.65034
47	3.10072	2.27094	1.42301	3.9017	2.79225	2.48524	2.02076	1.44804	1.49582	1.4609	1.53274	1.68538	1.4652	1.38999	3.11465	2.10924	3.18923	2.80929	4.23537	3.1162	3.81043	2.41241	2.54913	2.27026	2.8097	5.5121	4.31439	3.66216	4.35456	5.64249	8.2641	6.24312	5.67737	5.05703	4.45449	3.48611	4.60415	1.60473	1.2579
48	3.12197	2.29723	1.98484	3.51404	2.95705	1.20504	2.07137	1.48146	1.94124	1.07216	1.43644	1.62685	1.77333	1.68936	3.29383	2.61939	3.23328	3.09053	4.55995	2.54059	1.85594	1.81927	2.4282	2.57223	2.69877	3.77308	5.16728	3.48359	4.26752	4.80295	8.55795	5.63263	6.27146	3.77295	3.71515	3.7835	2.38553	0.871319	1.01379
49	3.18852	1.8714	1.70574	3.55452	2.91632	2.47303	2.34738	1.74348	1.75303	1.12711	1.5106	1.68453	1.46512	1.43126	3.05289	2.4523	3.21203	2.95084	4.49873	1.67655	2.91854	1.98438	2.35282	2.48409	1.59362	4.49813	4.07242	3.84158	4.79927	6.30239	8.05072	6.22733	5.57931	5.11003	3.91147	3.43362	3.38123	2.42468	0.881122
50	3.04352	2.19321	1.66409	3.62231	2.75938	2.22237	2.28891	1.9549	1.60108	1.37016	1.718	1.98959	1.51384	1.42988	3.03025	2.0276	3.48066	2.94305	3.97638	4.52978	3.61855	2.476	2.53659	1.90492	2.25757	4.25894	4.42112	3.509	5.54828	4.56748	7.65408	6.25793	5.27781	3.92623	5.26038	3.74499	3.10268	1.59925	-0.0220411
51	2.64955	2.14079	1.65336	3.20576	2.9164	2.25673	2.09603	1.57798	1.23053	1.46992	1.19621	2.27381	1.24337	1.68901	2.84256	2.70504	3.24464	2.81796	5.3421	1.62768	3.83768	2.45598	3.11712	2.68613	3.02421	3.61789	4.74155	4.13124	3.62424	5.89531	8.031	5.85855	5.6539	3.85502	3.80793	4.30327	3.6751	2.66645	1.49344
52	3.67034	2.26865	1.93407	3.60506	3.01584	1.40414	2.24231	1.58394	1.70104	1.57414	1.67123	1.72121	1.377	1.43495	3.459	1.99947	3.31198	3.0765	4.9557	3.08715	4.25489	2.29126	2.2681	1.58178	2.4927	4.91107	4.90332	3.78962	5.77379	4.49258	7.38767	5.61846	6.42821	4.8222	4.2097	3.10249	3.87732	1.39974	1.37977
53	2.99803	2.29866	1.58617	3.3863	3.12143	1.1672	2.2855	1.49238	1.58336	1.63902	1.44572	1.78749	1.8822	1.77581	2.88945	2.77095	3.06534	2.8972	4.11946	2.33879	4.29476	1.78189	2.08766	2.12425	2.95644	4.90472	5.29573	3.41474	5.26408	5.06892	7.85548	5.17663	6.43857	3.92487	4.00284	3.59809	3.8936	1.91334	0.631039
54	3.22171	1.86754	1.96916	3.9114	2.67622	2.4931	2.28521	1.90115	1.46331	1.65135	1.40419	1.92424	1.72189	1.99763	3.27776	2.22471	2.86792	2.45671	4.92328	3.17725	4.15084	2.49832	2.65212	2.16529	2.70457	4.47991	4.24069	4.02375	5.18569	6.41753	7.34731	6.21622	6.40883	3.66073	4.28016	3.36178	4.85808	3.00316	1.73685
55	2.94452	1.90932	1.04766	3.61983	3.43403	2.12633	2.46806	2.05915	1.5135	1.4662	1.46602	2.24481	1.43837	0.79474	3.00331	2.44563	3.45252	2.57805	3.95138	4.96222	3.60266	2.34507	2.28392	1.95852	2.96483	4.749	5.37611	3.4186	6.14188	5.42117	7.82116	5.58752	4.44425	4.11468	3.80829	4.19195	4.07268	1.99327	1.79729
56	2.77439	2.08247	2.08069	3.57949	3.06715	2.6825	2.24049	1.479	1.71075	1.22657	1.5179	1.75625	1.3013	1.50024	3.40561	2.00088	3.26091	3.2316	3.73414	2.57893	3.41165	1.4565	2.44863	1.81871	2.81747	4.92492	4.45103	4.09605	5.02198	5.13554	7.01427	6.13108	5.8257	3.34708	4.02574	4.13611	3.91968	1.89666	1.6678
57	2.98357	2.39447	2.02832	3.61419	3.01258	2.5011	2.64819	1.71508	1.45915	1.45249	1.03322	1.85936	1.31391	1.61279	4.04306	2.50896	2.42881	2.99857	3.58451	3.15814	2.83865	1.91024	2.90295	2.45349	3.68218	4.61147	5.1135	3.63141	5.15586	4.57123	8.76699	5.82792	5.985	4.3642	3.58608	4.38025	4.30098	1.79563	1.72498
58	2.98414	1.96033	2.02016	3.84015	2.67837	1.27492	2.24694	1.7215	1.49155	1.48502	1.07814	1.79332	1.5106	1.60577	3.88371	2.93663	3.89512	2.48739	4.9281	3.37416	4.40256	2.91095	2.91114	1.60234	3.28957	4.34341	4.46239	4.50813	5.83971	5.65518	8.57805	6.09596	5.88809	3.79177	4.6442	2.94382	3.67728	3.37905	0.784558
59	2.86177	2.54647	2.16041	3.54606	2.72341	2.78823	2.41216	2.02751	1.19399	1.7068	1.60627	1.66293	1.5427	1.6354	3.338	2.72956	3.19756	2.38486	4.50457	3.07589	2.29284	2.78914	2.92774	2.39989	4.01211	4.17332	4.94759	3.19292	4.96755	6.07929	7.2551	5.72107	5.4928	3.30603	4.24755	2.95638	3.67365	1.48192	0.479413
60	2.80121	2.27146	1.77946	3.05001	2.49782	2.44501	2.05308	1.95025	1.34142	1.2348	1.64778	1.95091	1.19189	1.56796	3.47561	3.06796	3.25281	3.09285	3.53582	2.05142	3.08271	3.35762	1.98019	2.12215	2.977	4.72956	4.64057	4.44546	6.66421	6.68649	7.57353	6.36471	5.88979	2.89421	4.60662	2.84392	3.58413	0.733406	2.48432
61	3.26749	2.33384	1.14554	3.45881	2.53187	2.50011	2.41404	1.91005	1.64918	1.6082	1.4476	1.95087	1.45287	1.74116	3.84111	2.55416	3.17612	2.31861	4.28494	3.32596	1.69952	2.35822	2.63871	2.13387	3.06612	3.8621	4.77538	3.93305	3.77365	5.79116	7.68422	5.88588	4.95769	4.19092	4.27849	3.83382	2.75645	1.72174	2.30276
62	3.24128	2.16942	1.36588	3.67172	2.84847	1.53663	2.5495	1.86049	1.57129	1.9352	1.53317	1.74216	1.51839	1.51056	3.37637	2.61001	3.66013	2.4167	4.46053	3.04706	2.50035	1.77861	2.49103	2.30187	3.5885	4.62649	4.93753	2.65991	4.94099	4.38848	6.94233	6.08817	5.75801	4.57265	2.92531	2.37839	2.9198	1.83066	2.61875
63	3.1727	2.16581	1.96777	3.90008	2.61779	2.49197	2.17154	1.59075	1.56991	0.917376	1.47061	1.55148	1.19039	1.83387	2.99205	2.80008	3.0051	3.04476	5.34515	2.62864	3.70038	1.84397	2.46655	1.84154	3.59194	3.32199	4.97946	3.69755	4.61198	5.307	8.01398	5.65415	4.81282	2.87989	2.67469	5.28118	4.18519	1.92165	1.84643
64	3.02618	2.85584	2.13234	3.48336	3.12531	2.11909	2.47055	1.85785	1.48201	1.26206	1.32926	1.78783	1.64513	1.50519	2.98767	2.10169	3.83366	2.45725	3.3707	2.51841	3.48303	2.96056	2.1002	1.96907	3.03403	3.61918	4.97094	3.07997	5.98692	4.9461	7.98784	5.58718	5.14742	3.89287	3.71455	2.6242	1.63788	3.18286	2.41795
65	3.24272	2.3356	1.66951	3.8517	2.98776	2.4169	2.22192	1.5542	1.69729	1.56587	1.46029	1.93124	1.14802	1.72616	2.89626	2.5369	3.11361	2.2964	3.54475	2.63232	3.9741	3.50644	2.29863	2.33372	3.78705	4.43059	5.51592	3.78064	3.90043	6.29397	8.35636	6.26913	5.87121	3.59019	2.26853	3.97094	3.78866	2.3469	1.89402
66	2.92176	2.11272	1.81336	3.60579	2.83431	2.69656	2.28315	1.89713	1.79997	1.64772	1.78371	2.13808	1.00092	1.3501	3.02958	1.92372	3.47463	2.5648	4.60329	2.44324	3.50297	2.72637	2.63953	3.04069	4.13712	4.27144	4.78364	3.04418	4.12824	6.00517	7.311	6.59683	5.95504	3.91828	2.17839	4.74771	2.98356	1.67247	0.64006
67	3.12088	2.40761	1.90518	3.68266	2.90461	2.53014	2.14245	1.52089	1.28791	1.29166	1.71051	1.75749	1.38465	1.59752	3.37989	2.47678	3.16464	2.88368	4.73745	3.16086	3.81182	2.34473	1.95434	1.95346	3.15143	4.02764	4.90449	3.2519	5.59982	6.52934	7.58403	5.79184	5.00467	3.35724	3.81385	3.57955	4.13723	2.42294	1.84772
68	3.69911	2.58869	1.55771	4.48222	2.88367	1.20082	2.12312	1.82475	1.66604	1.52877	1.52077	1.85429	1.57269	1.6371	3.68722	2.16392	3.18838	2.8159	4.14531	2.67478	3.12986	3.13783	2.69341	2.57952	3.19259	5.50057	5.43858	3.68642	5.19533	5.85713	6.38104	5.12693	6.02901	3.75938	3.33311	2.33021	3.76986	2.12197	0.0889357
69	3.134	2.77547	1.79118	3.8228	2.94291	2.50858	2.22499	1.8228	1.49013	1.16274	1.49802	1.25718	2.06641	1.98387	3.34738	2.19652	3.78016	2.75082	3.8417	3.22047	4.47449	2.21836	2.5731	2.19937	3.94926	5.28871	5.61731	3.10466	5.42132	6.82461	8.01549	5.40376	4.42278	4.31516	4.52048	4.74756	3.43882	3.41466	0.180641
70	2.89324	2.34149	0.957914	3.6733	3.33204	2.64708	2.37627	1.65672	1.2477	1.45249	1.47068	1.85056	1.45576	1.91225	3.11442	1.81789	3.09149	2.48234	4.73728	2.37593	4.55107	2.59149	2.48827	2.47479	3.54855	4.58714	5.55659	3.28273	5.43062	6.3617	8.19861	5.20076	5.75768	3.08883	4.55857	3.19945	3.41108	2.00557	2.30776
71	3.18281	2.16371	2.00749	3.95972	2.99315	2.74943	2.40886	1.50508	1.40956	1.07986	1.62979	1.9812	1.36706	2.04856	3.39913	1.94285	2.80598	2.70262	4.49712	3.13032	5.28764	2.17869	2.60184	1.90686	3.14396	4.38805	4.26033	2.25996	5.56478	6.16877	7.55105	5.01443	4.95613	3.51023	3.91258	3.90239	2.35714	2.66966	2.8663
72	3.12479	2.4393	1.39985	3.871	2.96516	2.44098	2.37757	1.4774	1.45282	1.27109	2.01568	1.70682	1.70185	1.37911	3.22228	2.4671	3.87066	2.1378	5.01871	0.624557	3.45071	2.96839	1.89821	2.83259	3.74128	4.38579	3.86429	3.47412	5.00448	5.70767	7.95507	5.42204	4.1222	3.95398	3.51126	3.90234	4.23955	2.6936	2.40102
73	2.63636	2.42003	1.35376	3.83445	3.47308	0.950998	2.34468	1.93306	1.70044	1.35387	1.44284	1.70402	1.42656	1.55056	3.47849	2.6088	2.62607	2.41763	4.2459	3.98957	4.49017	2.46536	2.26485	2.19494	4.02501	4.42902	5.24311	3.68948	5.24839	6.20218	7.68901	6.00301	5.2228	3.75942	3.39316	4.49159	4.49288	2.49847	1.40402
74	2.68181	2.54293	1.8982	3.9663	2.86547	2.54626	2.2357	1.60772	1.60315	1.58731	1.72845	1.78063	1.90885	1.56473	3.30724	2.71385	3.40447	2.82092	3.72484	1.98739	5.37186	1.91636	2.53791	2.14621	3.28861	5.16539	4.81332	2.36606	3.63865	6.66626	7.64504	6.70908	5.42713	4.52661	4.89331	4.57783	3.24777	3.08879	1.30837
75	2.94939	2.20341	1.49844	3.8489	3.20285	1.85017	2.04212	1.94036	1.43364	1.20184	1.43247	2.08105	1.55015	1.44165	3.02351	2.212	3.25384	2.86845	4.64448	3.0088	4.61942	2.59705	2.73631	2.53769	3.62655	3.94693	5.8415	2.909	5.12253	5.3935	7.59958	5.83583	5.55913	2.51136	3.89632	3.64266	2.59777	2.23157	2.31296
76	3.19173	2.02198	1.9484	4.06923	2.92777	2.2674	2.32114	1.65003	1.20612	1.60641	1.6728	1.88718	1.44588	1.75242	3.26369	2.27517	3.52945	2.02657	3.97066	1.94506	4.24939	2.36207	2.69563	2.65696	3.13607	4.47174	5.65752	2.50921	5.44442	3.98088	7.7343	5.48658	4.19831	2.7212	3.08199	4.25912	3.55265	1.76149	1.11836
77	3.24001	2.47079	1.8388	3.66572	3.13336	0.784097	2.48087	1.85259	1.18936	1.74158	1.1782	2.31576	1.57068	1.37598	3.11263	2.80857	3.8163	2.55876	4.1577	3.22413	4.30624	2.8773	3.16143	2.04907	4.6954	4.42371	4.76673	3.17827	4.63529	6.64308	9.30301	5.54083	4.7593	3.08896	3.65782	4.06022	4.18839	2.38024	1.23062
78	2.83574	1.83359	1.47282	3.87318	3.28941	2.22201	2.3563	1.79752	1.36996	1.67603	1.51908	1.9026	1.02797	1.87397	3.34422	2.14535	3.29614	3.12298	4.07448	2.85518	4.20512	2.93003	2.62598	2.84793	3.90995	4.22396	5.02524	3.44184	4.34389	3.97159	7.24644	5.37407	5.92105	3.47635	3.08965	4.09406	3.50593	2.11394	2.75948
79	2.97077	2.2228	2.12699	4.57642	3.31613	2.41236	2.17896	1.58917	1.52671	1.68817	1.25735	1.56873	1.47186	1.57637	3.51539	2.62491	3.28563	2.60065	3.73454	3.71584	4.22556	2.86134	2.25875	3.62002	2.45481	5.63224	5.1208	2.69963	3.07358	5.24536	8.16911	5.86924	6.12318	4.87886	2.8793	3.22981	2.74879	1.96009	1.8323
80	3.05986	2.59673	1.45992	3.85023	2.54903	2.38908	2.25297	1.79351	1.23347	2.38653	1.41287	1.80532	1.2184	1.97226	3.2862	2.56176	3.38737	2.68799	5.3848	2.32022	4.04737	1.71027	2.68243	2.7071	2.79268	4.41226	4.61253	2.35638	5.32526	5.96296	7.59852	4.94278	5.0531	3.19362	2.20328	3.51818	4.51395	2.39296	1.28915
81	3.02421	2.17748	1.62614	3.96221	3.07418	2.45912	2.1766	1.67475	1.54493	1.33411	1.79782	1.56661	1.51946	2.07897	3.44408	2.46512	3.04094	2.84368	4.01641	3.67421	2.53159	2.58729	2.25933	2.80338	3.81609	4.68642	4.71974	3.024	4.51076	6.00135	7.12099	5.63541	5.36583	0.894023	3.09771	3.70738	2.03138	2.3006	1.11562
82	3.07672	2.8441	2.06276	3.92526	3.24896	2.0013	2.377	1.60902	1.32788	1.55063	1.67505	1.60468	1.20243	1.26974	3.62534	2.29439	3.61599	2.5818	5.16991	3.34433	5.07779	2.07182	2.41564	2.12491	3.32438	4.17562	5.13483	2.76988	4.99266	5.17004	6.62674	6.32345	5.35499	2.75026	3.73052	4.65299	4.04599	1.64809	2.37511
83	3.04988	2.64783	2.01138	3.70841	3.49055	2.02694	2.28367	1.88276	1.5769	1.75165	1.23782	1.69833	1.26017	1.72523	3.30485	2.4401	3.53558	2.89282	4.91748	3.54271	2.67545	3.29017	2.48641	2.64426	3.49932	4.10007	5.10627	3.50125	4.41396	6.23821	6.30232	5.29242	6.09738	3.30454	2.67002	3.41569	3.85199	1.89806	1.86122
84	2.63184	2.58972	1.74628	4.16268	2.90773	2.58529	2.34984	1.59286	1.51916	1.62607	1.55339	2.03763	1.69181	1.95139	3.49101	2.55293	3.7215	2.82707	4.86626	3.25483	5.5551	2.46855	2.68069	2.21485	3.34673	4.78737	5.63818	2.62222	4.28747	6.39996	7.14126	4.956	5.70623	3.35333	3.47245	3.92586	3.23048	1.83175	0.679344
85	3.2857	2.24658	1.92317	3.88804	3.0349	2.51764	1.91991	1.89511	1.52271	1.92172	1.21943	1.68	1.91384	1.72695	3.63516	2.40607	3.43305	3.07446	4.89971	3.1663	2.3365	2.28361	2.7495	2.84137	3.39919	5.26711	5.32644	3.25027	5.17786	5.45804	6.58803	5.96458	5.66027	2.74556	4.17751	3.74424	2.7634	2.53538	0.795939
86	2.93666	2.40261	2.20391	3.79162	3.36905	2.21048	2.27208	1.67012	1.45569	1.64818	1.36407	1.40446	1.4085	1.82716	3.13079	2.31528	3.46196	2.76708	3.85216	3.38063	3.40076	2.3895	2.43131	2.95808	3.8783	4.32052	4.58467	3.41348	3.99071	5.59889	7.78889	5.50405	6.79038	3.116	3.86509	3.4941	3.29874	2.55324	0.717963
87	2.94719	2.6625	2.07313	3.81356	2.70973	1.92569	2.21938	1.78939	1.20753	1.83623	1.48555	1.64805	1.46311	2.02564	3.21937	2.64249	3.55589	2.86261	3.7271	2.08932	3.18754	0.957887	2.33458	2.86411	2.99777	4.73321	4.6459	3.45322	4.59922	6.54683	7.37583	5.51033	5.1945	3.48189	4.17638	3.84925	3.75303	3.00643	0.708428
88	3.29195	2.39248	2.16207	4.18151	2.59693	1.50188	2.3807	1.55083	1.54171	1.67696	1.32597	1.77678	1.43284	1.81647	3.52229	2.23342	3.97609	2.40045	4.53108	2.65156	3.60832	2.6461	2.50371	2.54483	3.88454	4.93055	5.58367	2.98828	5.39366	6.01426	7.33585	5.88826	6.07681	2.76889	3.64493	3.18057	2.62776	1.89866	2.0069
89	3.1632	2.34952	2.06781	4.47218	2.68415	2.60137	2.48889	1.50253	1.52324	1.1607	1.27336	1.99737	1.09163	2.22022	3.09547	2.4719	3.70953	2.96914	4.59253	2.84087	3.06206	2.82633	2.38525	1.80992	3.67819	3.61242	6.28376	3.68827	5.82537	7.03994	7.14291	5.16218	4.05625	2.95096	3.95065	3.92701	2.92631	3.01667	2.30804
90	2.99429	2.2986	1.63741	3.86551	3.0612	1.86305	2.44548	1.51829	1.39172	1.97753	1.08436	1.59377	1.7296	1.83732	3.32629	3.06811	3.35851	3.31577	3.82054	4.01755	2.7212	2.41379	2.1014	1.84359	2.37798	4.23032	4.86458	3.32241	3.39455	6.80549	7.1936	5.92325	6.02227	3.73877	3.25578	4.36188	3.5409	0.47857	2.2165
91	2.57543	2.30102	1.80652	3.99734	2.91832	2.35955	2.59325	1.74207	1.14156	1.83871	1.55319	1.69161	1.2456	1.88468	3.26856	2.47242	3.44348	2.59007	4.10322	2.94086	3.181	2.03806	1.90443	2.70905	3.69522	3.40173	4.86088	2.83012	6.1479	6.51202	7.70527	5.00977	7.12416	3.20436	3.15472	3.47925	3.26654	2.63464	1.72959
92	3.16248	2.63752	1.7056	4.62567	3.1653	2.53838	2.18414	1.42614	1.37606	1.7276	1.41827	1.80564	0.812744	1.9153	3.07638	2.87202	3.84646	2.9115	4.95386	3.54239	3.01511	2.42012	2.66628	2.21391	3.50611	4.42849	4.76751	2.30652	3.93675	4.56433	6.84273	6.23818	6.00631	1.97892	3.48608	4.63098	3.94646	1.28167	1.91486
93	3.48741	2.44848	1.66908	3.89738	3.13247	2.11243	2.10012	1.6104	1.36867	1.87817	1.21842	2.05462	1.28876	1.99395	3.59782	2.7923	3.7966	3.00196	4.3313	1.20833	3.12349	2.1615	2.57222	2.48691	2.91817	5.14728	5.14519	3.59706	4.63534	6.56108	7.73499	5.22017	5.82842	2.94604	3.76185	3.54968	3.73075	1.69802	1.82117
94	3.11212	2.56444	2.23755	3.73655	2.84761	2.21454	2.1806	1.45813	1.39937	1.68655	1.36894	1.64153	1.19573	2.16619	3.0131	2.54422	3.89512	2.90856	4.04221	3.3816	3.47707	2.12341	1.92901	2.87617	3.05889	4.73646	4.64472	3.63864	4.73969	6.77034	6.04741	4.5696	6.18019	3.37917	2.48232	4.09824	3.31951	1.54795	1.90729
95	2.91862	2.49209	1.92628	4.0632	3.2484	2.24308	2.16798	1.54307	1.76794	1.89296	1.59772	1.73249	1.51349	1.87859	3.68554	3.03508	3.40735	2.86144	4.42783	3.17414	3.79621	2.57052	2.96326	3.06171	2.70291	4.04231	4.94729	3.55137	4.53431	6.36636	6.2141	5.24859	5.63386	2.53014	3.72257	4.25037	3.7945	2.70541	1.03041
96	2.5677	2.54789	1.6512	3.94668	2.72639	0.416872	2.62556	1.66952	0.981866	1.66452	1.16574	1.62525	1.42011	2.19834	3.17704	2.70026	3.45717	2.89708	4.87447	3.15351	4.11692	2.27513	2.35407	2.45908	4.78443	4.70289	4.67284	3.46366	4.46807	6.62168	7.0304	5.72062	6.40441	2.99095	3.19638	4.72061	3.66268	1.64722	0.776831
97	3.00949	1.71026	1.67651	4.32533	2.91645	2.12021	2.0398	1.90767	1.83698	1.72833	1.37192	2.06083	1.18458	2.49313	3.24013	2.83978	3.1032	3.04804	4.37716	2.77396	3.14458	2.61255	2.50064	2.76685	3.46545	4.64027	4.88627	2.51739	4.03829	6.59343	7.98812	5.35283	6.02239	3.85743	3.99668	3.68477	4.21132	2.03094	1.99949
98	3.49156	2.51674	1.59519	4.26929	2.91598	2.1731	1.96415	1.51036	1.55564	1.91385	1.43945	1.62248	1.21791	2.25068	3.48042	3.0099	3.37398	2.64444	3.899	3.04189	3.73111	2.56281	2.34029	3.07585	4.34756	4.56393	4.18508	3.60364	4.22169	6.98413	7.76036	5.07733	5.43257	2.79782	3.84176	4.26216	4.91598	2.67715	1.6641
99	3.6663	2.39117	2.01914	3.83148	2.66059	2.4019	2.2738	1.653	1.24767	1.59103	1.30291	1.51349	1.42044	2.13076	3.34732	2.95356	3.33005	2.88309	5.08668	3.33155	5.68898	2.60936	2.43976	2.60616	3.89416	4.39964	5.86088	3.20252	4.46256	7.17465	7.58451	4.44199	6.18946	3.35755	3.57259	3.35479	2.7274	2.22095	1.85297
100	3.50561	2.24334	2.10915	3.78938	2.75311	2.24559	2.21403	2.15504	1.50792	1.63474	1.01796	2.06837	1.16003	1.89002	3.45711	2.61596	3.34287	2.65315	4.36279	2.77316	4.63189	2.63045	2.74966	2.61337	2.97679	4.53328	4.96406	1.63994	4.70042	6.67999	6.82014	5.95916	6.70069	3.27276	3.17775	3.69377	4.1549	3.5552	2.05122
101	3.50111	2.37924	1.63926	4.08254	2.69984	2.37646	2.16347	1.81027	1.46914	1.64047	1.41186	1.77187	0.982972	1.6881	3.31713	2.41468	3.73496	2.64965	4.23186	3.68648	3.19702	2.94452	2.52197	3.04784	2.54828	5.48368	4.78917	3.60127	4.25307	7.13506	6.42826	5.35481	5.48964	2.53235	3.20261	3.70656	4.06535	2.16643	2.34603
102	3.55654	2.24053	1.90214	3.68594	2.90581	1.69642	2.04626	1.35766	1.35884	1.49466	1.3041	1.53965	1.16054	2.04265	3.24121	2.59181	2.7637	2.57433	4.38167	2.30906	3.45639	1.84714	2.31798	2.58965	2.63194	4.94048	4.81552	3.20524	4.55089	6.4526	7.15978	5.43895	5.51819	4.25714	3.30876	4.09972	3.90442	2.37538	1.80813
103	3.1902	2.54534	1.27963	4.21276	2.74043	2.24775	2.32405	1.73303	1.46506	1.52401	0.992178	1.62747	1.49111	2.16396	3.28853	2.62485	3.47369	2.84675	5.02001	3.63254	3.68571	2.31572	2.45838	2.05843	3.04747	4.64243	4.93155	3.24588	5.03363	6.52823	6.73319	5.81045	5.62155	3.048	4.46103	4.70146	3.58622	2.65293	2.65569
104	3.31789	2.35362	1.98448	3.57777	2.94644	1.25604	2.30088	1.72906	1.60338	1.72802	1.70077	1.59729	1.41069	2.05106	3.51828	2.27336	3.72669	2.82477	4.52269	2.50996	4.69277	2.09666	2.74253	2.99304	3.44266	4.4239	5.37772	3.07643	3.92391	5.98384	6.66214	6.11378	7.08185	2.29303	3.05526	4.43188	2.97904	2.17578	1.61984
105	3.30453	2.61259	1.75979	4.14856	2.62439	1.92569	2.41381	1.50881	1.71869	1.85676	1.42627	1.44341	1.28188	2.04477	3.41802	2.66397	3.71737	3.05044	4.0884	4.0303	2.30514	1.73136	2.75396	1.88486	3.87177	4.94365	4.1875	1.96482	5.15122	6.53568	6.32587	5.9676	5.92301	4.0187	3.55814	3.52543	3.30901	2.2428	3.19671
106	3.28767	2.45164	1.68746	3.86776	2.72346	1.7571	2.40564	1.50647	1.65696	1.60459	1.26716	1.19797	1.24304	2.12799	3.35188	2.65207	3.38091	3.04275	4.2287	2.84611	3.92644	2.48594	2.28519	2.56971	3.83719	5.07558	5.76444	2.43624	3.12294	6.0534	7.52462	4.87167	6.13338	2.44737	2.10385	3.44	3.41303	2.15801	1.5184
107	3.36085	2.35065	1.85979	3.9747	2.70434	1.81967	2.17536	1.92885	1.64767	1.68803	1.1543	1.66522	1.37559	2.10039	3.3286	2.73198	3.35931	2.68686	3.89644	2.55539	3.46315	2.01875	2.0968	2.45163	4.18466	5.39158	5.04846	1.97964	3.81726	7.13097	7.44725	5.76427	5.51566	3.05033	3.6464	4.8679	3.53997	1.39103	2.06891
108	3.02085	2.17197	1.69095	4.15091	2.56407	0.286891	2.03385	1.88881	1.48457	1.41928	1.32243	1.3125	1.41842	1.66114	3.41295	2.54723	3.64554	2.71954	4.01081	3.00941	4.71666	1.57837	2.25807	2.56045	3.52371	4.06276	4.86669	2.844	5.23397	5.5635	6.60308	5.50511	5.27798	1.80751	1.96768	4.32445	4.65006	2.91988	1.55593
109	3.13857	2.9519	2.23217	4.33144	2.61983	2.06758	2.14569	1.94442	1.56218	1.60416	0.900673	1.70692	1.40256	2.52059	3.61855	2.55686	3.54317	2.89517	4.86407	2.09933	2.64049	2.20283	2.78715	2.96289	3.16165	5.53614	4.87614	3.95024	4.35827	6.72922	6.71673	5.64379	5.04406	2.51911	3.06747	4.39093	3.2246	2.37633	1.91723
110	3.42307	2.67657	1.59307	4.15099	2.91318	1.52265	1.84979	1.83751	1.5429	1.37581	1.32975	1.89011	1.47774	1.81678	3.38738	2.86221	3.32552	2.86186	4.27546	3.00225	4.49164	1.77006	2.83114	2.24562	3.71124	4.46524	4.84445	2.55729	4.47161	6.08887	7.19047	5.11831	5.43579	3.12127	2.96071	3.58018	2.97331	3.18796	0.814068
111	3.22114	2.53245	2.1158	4.50694	2.29739	1.91562	2.10705	1.42639	1.45502	1.62778	1.09752	1.78535	1.51402	2.65161	3.61112	2.07895	3.39737	2.96791	3.79734	2.9158	2.7181	2.4037	2.57636	2.40714	3.53921	4.61012	4.51526	2.44318	4.68721	7.98555	5.83482	5.5375	5.76652	2.6097	4.09594	5.21231	4.2765	2.66304	1.06442
112	2.81907	3.09357	1.9586	4.12624	3.00295	1.92532	2.25388	1.92476	1.11436	1.29013	1.25738	1.73441	1.53889	2.09053	3.10735	2.86755	3.905	2.30041	4.87241	3.80021	3.44015	2.33415	1.62275	2.2555	3.82961	4.52457	4.79175	3.08326	4.04959	5.58482	6.47556	4.71236	5.28591	3.05173	3.23271	3.66725	2.49052	3.57671	2.16087
113	3.38523	2.58517	1.6558	4.46524	3.0098	1.89712	1.93049	1.69331	1.4947	1.47346	1.29354	1.58853	1.58479	2.10182	3.73201	1.94558	3.3134	3.00019	4.16974	2.78225	4.9466	2.72064	2.94267	3.0678	3.19351	3.38874	4.01901	2.40573	4.2718	6.82756	7.29079	5.68459	6.03678	2.8907	4.83576	4.87004	4.05033	3.48975	1.34704
114	3.19839	2.74451	1.80332	4.25923	2.89377	2.21056	2.06959	1.35265	1.19853	1.30768	1.15842	1.81722	1.58622	1.95328	3.68871	1.98237	3.45998	2.60283	4.45501	4.32566	4.74725	2.08845	2.61542	2.91143	4.06857	4.68675	5.57978	2.47019	4.51554	6.32455	5.61408	5.70842	5.80694	2.01524	2.8036	3.68747	4.50216	3.1778	1.24084
115	3.2759	2.69553	1.81993	4.08474	2.69326	1.92043	1.92734	1.83328	1.73987	1.80584	0.800199	1.68172	1.25644	1.92917	3.3357	2.49882	3.72185	2.33112	4.84786	3.00599	3.57487	2.53243	2.55703	2.56885	4.18849	4.1407	5.20316	1.75377	4.5155	6.11702	6.14412	5.42574	5.81065	2.16397	3.0648	4.07671	3.21133	1.43805	1.31173
116	3.59083	2.73879	1.57765	4.45609	2.69622	1.95754	2.12038	1.70439	1.18846	1.87669	1.4741	1.78342	1.66075	2.04373	3.53288	2.53795	3.26081	2.88377	4.81013	1.60116	4.25026	2.31509	2.32405	2.35961	3.66014	4.5158	4.88137	3.06406	2.8634	5.53559	5.79585	6.65411	6.09212	3.2882	4.07118	4.14135	3.25115	3.126	0.80635
117	2.8754	2.34173	1.09776	4.42061	2.53095	1.88822	2.05727	1.88398	1.61978	1.42683	1.56106	1.61472	1.38445	1.87817	3.39932	2.62084	3.58214	2.66413	3.27916	1.91136	3.71862	2.14087	2.78005	3.17573	3.8522	4.61546	4.95298	2.3354	4.55051	4.96587	6.82924	5.48708	5.79384	3.18422	3.52259	5.16034	3.90816	2.33474	0.0658293
118	3.26812	2.76263	1.59744	4.30542	2.61338	1.89713	2.2324	1.74127	1.61775	1.43784	1.5047	1.75287	1.74455	2.0477	3.31085	2.21896	3.49935	2.65336	4.73778	3.99461	2.70676	2.58876	2.49569	2.8958	3.62769	4.10476	4.30758	2.70907	4.60872	6.53091	6.5964	6.23684	5.85237	2.49706	4.17167	3.26688	2.2425	2.94726	1.9046
119	3.91036	2.81982	2.12053	4.63205	2.54537	1.92657	1.96198	1.81261	1.45644	1.785	1.53111	1.38499	1.78649	2.05219	3.74519	2.42355	3.71366	2.90888	4.07097	1.30967	2.41329	2.49069	2.71299	2.32174	4.14449	3.93574	4.97566	2.32182	4.99392	6.70162	6.08501	5.35163	5.24458	1.33994	3.36664	4.45622	3.1646	2.8002	0.325021
120	3.10048	2.81824	1.55789	4.20151	2.7481	1.23335	2.2721	1.77709	1.52766	1.68028	1.83522	1.61581	1.34232	1.98369	3.62988	2.62705	3.74601	2.71509	3.81994	4.2724	3.73027	2.04176	2.84117	2.82313	3.6929	5.24324	4.0504	2.74307	3.11155	6.44635	5.73112	5.7381	5.80864	2.62174	4.05766	4.82381	1.88707	2.45468	1.35962
121	3.12583	2.92823	1.76653	4.10899	2.41646	1.75971	2.16496	1.85547	1.38104	1.8564	0.982774	1.72587	1.15569	2.18206	3.08845	2.01185	3.65523	2.62509	3.84248	2.11506	2.77846	2.90902	1.90549	2.99389	3.63566	3.37589	5.46651	2.70789	5.17135	6.31224	5.767	5.70061	6.0637	2.94864	3.2905	3.74133	3.04224	4.07679	2.68442
122	3.08432	2.71949	1.94966	3.93523	2.90852	2.14823	2.11264	1.76234	1.53039	1.95206	1.54079	1.88761	1.62413	1.90438	3.51559	2.38359	3.70597	3.0705	3.98493	2.96762	5.01182	1.74792	2.34078	3.13736	3.3772	4.99524	5.62139	2.92819	4.60581	6.70213	6.56599	6.30571	4.83558	3.00184	4.10951	3.28721	4.08903	2.70862	1.51846
123	3.09777	2.65813	1.40106	4.15482	2.52643	2.33807	2.04422	1.79234	1.57898	1.90338	1.34205	1.85815	1.68025	2.40587	2.65202	2.25301	3.63904	3.0321	4.97465	4.63593	3.71328	1.58852	2.32909	2.76254	3.42933	3.72827	4.57556	3.04358	4.30449	6.83596	5.91545	5.47639	5.73817	2.52051	3.75788	3.05539	2.3441	2.37862	1.62081
124	3.49938	2.67196	1.47577	4.35108	3.11746	2.37705	2.20775	1.55587	1.22563	1.3859	1.2407	1.473	1.65278	2.1858	3.31527	2.41395	3.68259	3.33546	5.21245	4.01347	3.63868	2.83499	2.45291	2.53295	4.34668	4.37762	4.8493	1.8764	5.46857	5.85312	7.49886	4.94863	5.59082	3.33525	2.69778	3.51684	2.20318	4.14657	2.05395
125	3.37533	2.76744	1.39373	4.36864	2.83257	1.29544	2.15344	1.68866	1.54649	1.58181	1.16877	1.74004	1.48154	1.93014	3.13439	2.1863	3.67138	2.90703	3.34472	3.45227	5.17094	1.80844	2.66254	2.19119	3.6636	4.53594	4.85564	2.85217	5.3764	6.37374	5.76841	5.46571	4.6601	2.1249	3.77944	4.92248	3.51118	2.14441	0.125899
126	3.28957	2.78371	1.5119	4.67258	2.73814	2.28202	1.94798	1.6563	1.58095	1.61011	1.45569	1.83764	1.52528	1.99656	3.6509	2.56106	3.44659	2.84508	3.83807	3.37287	3.21385	2.53205	2.61942	2.56489	3.75606	4.32462	5.05594	3.02329	4.93926	5.6433	6.04827	4.90415	5.14885	1.6829	4.01083	3.95457	3.68271	3.54482	2.80486
127	3.2748	2.76641	1.77971	4.31897	2.79724	1.39256	2.22638	1.83882	1.28421	1.70887	1.08502	1.68037	1.55366	2.12146	3.55369	2.63977	3.40622	2.30044	3.61996	3.55292	4.00535	2.42488	2.21304	2.1734	2.96568	3.96339	4.96646	2.82894	4.21723	5.31472	6.5266	5.55196	4.39523	3.16073	4.63712	4.48783	3.79699	3.56954	1.50102
128	3.04175	2.71145	1.13968	4.2755	2.36904	1.55083	1.80806	1.51635	1.54222	1.58527	0.882853	1.75217	1.45597	2.2708	3.22798	2.42153	3.77263	2.68706	4.19488	5.06976	3.06103	2.43102	2.56419	2.13788	3.31157	4.12145	3.66324	2.42896	4.95826	6.36595	4.92677	5.11029	4.74282	3.00151	3.71066	4.40325	3.24826	3.25899	1.1125
129	3.982	2.9174	1.86735	4.97035	2.73076	2.00997	1.99966	1.69309	1.93601	1.591	1.33096	1.29434	1.50667	1.98991	3.46178	2.70958	3.34388	2.76937	3.30696	4.16734	3.42235	2.22034	1.81085	2.57643	3.27379	4.26778	5.00106	2.59146	4.29547	5.184	5.12494	5.6423	4.38938	2.40322	3.69882	3.87213	3.85882	2.65359	1.99552
130	2.88416	2.45431	1.40578	4.63365	2.52717	1.46559	1.96825	1.75338	1.64836	1.32331	1.07981	1.87602	1.47952	1.94049	3.49616	2.35062	3.51572	2.81686	3.79258	3.16203	4.66253	2.34241	2.5161	2.25262	3.97931	4.52048	4.59306	1.10154	5.30647	6.76891	6.9133	4.73624	5.82444	3.1388	4.30153	5.52301	3.80547	2.80914	2.0927
131	3.40167	2.82683	1.61353	4.04386	2.99065	1.3961	1.87249	1.5954	1.57093	1.87187	1.31578	1.60249	1.3004	2.11478	3.44617	2.35348	4.1043	2.36173	4.9148	2.31703	4.0274	2.28886	1.81342	2.57306	3.32491	3.93603	3.67758	2.73511	4.41951	5.76229	6.02107	5.38693	5.49812	1.64419	3.36093	4.80023	3.0184	3.01812	0.927567
132	3.41045	3.17097	1.56266	4.63991	3.30486	2.06082	1.92061	2.07767	1.37065	1.42419	1.35525	2.01797	1.50773	2.18176	3.3737	2.37353	3.735	2.89612	4.83381	4.65385	2.76919	1.64367	2.73131	1.43184	3.94008	3.21169	4.45673	3.4904	4.98924	6.14177	5.53493	5.25183	5.72178	2.51736	4.32345	4.66803	3.41433	2.17868	1.60547
133	2.42738	2.50376	1.72327	4.86156	3.28212	2.47407	1.55159	1.7952	1.76602	1.57573	1.14622	1.35417	1.61255	1.85464	3.31004	2.25068	3.99436	2.90998	4.88098	2.5879	3.36233	2.42247	2.18552	2.84185	3.8088	4.70694	4.68048	3.48467	2.9561	6.16117	5.9383	5.72057	5.75179	1.59634	4.14118	4.38733	3.17329	2.16328	1.0893
134	3.33558	2.28113	1.26698	4.62168	3.20455	1.60546	2.02937	1.52572	1.44383	1.75343	1.25493	1.6201	1.46316	1.69274	3.28795	2.19561	3.43758	2.75699	3.62367	3.85787	4.59589	1.69674	2.05898	3.12372	4.00195	4.36027	4.86929	3.01181	5.63006	6.75017	5.37927	5.51635	5.61845	2.90363	4.60528	4.99493	2.92764	2.20751	1.34514
135	3.1824	2.36415	1.64774	4.35035	2.94815	1.93029	2.00843	1.67286	1.4195	1.41919	1.72271	1.08186	1.23333	1.46461	3.28785	2.61161	3.27764	2.27078	3.65751	3.00473	3.58837	2.05733	1.62103	2.86987	3.9432	3.75055	4.73452	1.56837	4.65806	5.61804	6.03385	5.9202	5.37412	3.57753	2.9875	4.2732	3.07676	1.62501	1.95601
136	3.21776	2.59442	1.43545	4.42665	2.98789	2.12012	1.82559	1.46518	1.89412	1.60826	1.21351	1.22914	1.0872	2.04727	3.00519	2.52073	3.20797	2.75351	3.89362	4.74791	3.30955	2.53484	2.50151	2.56108	3.93549	3.33067	5.13087	2.38089	4.46861	6.9113	5.39523	5.98819	5.3311	2.03573	1.96161	3.9515	3.59472	2.96661	1.13944
137	3.1105	2.76722	0.953416	4.21657	3.75284	1.67144	2.03343	1.89716	1.24656	1.12742	1.42603	1.67929	1.38616	2.26667	3.17583	2.46549	3.50842	2.6005	3.49998	3.92217	4.296	2.29729	2.57479	2.9491	3.73502	3.87427	4.77923	3.34788	4.77339	6.6884	5.64524	6.1536	5.67331	1.20511	3.8156	3.40752	3.26778	2.98771	0.324778
138	3.20489	2.47085	1.65551	4.74149	3.11397	1.52205	1.74506	1.71463	1.51163	1.34547	1.24391	1.74456	1.40264	2.23096	3.7186	2.29949	3.69683	2.87657	4.51487	3.5536	2.95265	1.85838	2.48184	1.93039	3.36813	3.21571	4.6058	1.89031	4.68902	6.73897	5.90001	3.89674	5.95025	1.88035	2.592	3.74937	2.63144	3.67832	2.6701
139	3.06811	2.64308	1.51473	4.56472	3.20258	2.70755	1.86612	1.88059	1.59695	1.42527	1.38198	1.1146	1.61015	2.07677	3.31022	2.77964	3.21196	2.75957	3.50423	4.43721	4.63267	2.91341	3.07294	2.66878	3.28946	3.76827	4.63081	2.63078	4.78892	6.88672	5.96479	5.41096	5.03116	1.79825	3.81857	4.08859	2.48784	3.31459	2.15647
140	2.43882	2.62606	1.5568	4.29649	3.26101	1.51061	1.95354	1.63619	1.5769	1.64475	1.56375	1.85704	1.39189	1.66363	3.39127	2.1572	3.33272	2.8538	3.39825	3.23489	4.39631	2.11276	2.66248	2.41026	3.16681	2.72967	4.23619	2.24518	3.40828	6.64727	4.90658	5.00813	4.53402	3.24466	2.88811	3.0337	3.56817	2.99789	1.53229
141	2.85417	2.93979	1.04171	4.46592	3.04914	2.23677	1.81715	1.82909	1.28417	1.32836	0.98713	1.59964	1.83214	1.80527	3.14601	2.45793	2.61385	3.20726	3.957	3.50973	4.90857	2.50308	2.63928	2.45056	4.03678	4.14866	4.97664	3.22645	4.47344	5.91957	6.12396	6.25205	3.85156	3.98826	3.14952	3.78135	2.68934	1.55991	1.15453
142	2.82563	2.97157	1.53868	4.41113	2.97829	1.25687	1.78418	1.88053	1.57025	1.47135	1.4412	1.70479	1.80594	2.19163	3.28573	2.2879	3.70998	2.9106	4.97467	2.76041	4.26742	2.35426	2.60112	2.87428	2.81069	3.14205	4.61376	2.90318	4.34528	6.06612	5.31311	5.22219	4.56689	4.31553	3.22781	4.49511	3.28927	2.35689	1.86519
143	2.91119	2.16576	1.32919	4.71637	3.24446	1.52371	1.76428	1.63772	1.35885	1.72876	1.19088	1.79434	1.97196	1.60327	3.18452	2.4249	3.03112	2.91259	4.62985	3.94136	2.92724	1.73689	2.34998	2.04065	2.94983	4.2005	4.23297	3.56576	4.34616	5.52095	5.77135	4.92658	4.98185	2.34031	2.41113	5.06842	3.56221	2.02705	1.83083
144	3.18406	2.93176	1.51626	4.27223	3.50678	2.20112	1.97268	1.64415	1.45847	1.48919	0.723598	1.34863	2.01316	2.13926	3.24551	2.11756	3.18878	2.96294	4.43826	3.92025	3.60398	2.84539	2.5154	2.38148	3.7748	3.83685	4.76255	2.51198	3.85148	6.84132	6.10301	6.66708	4.77551	3.40579	3.83069	4.45389	3.84004	2.2026	1.71576
145	3.37086	3.0116	1.28064	3.95963	3.25279	2.25198	2.10122	1.84	1.40436	1.80932	1.47761	1.63178	1.13689	1.91848	3.19533	2.73675	3.32626	3.23951	4.60602	3.90119	5.60894	2.95295	2.54638	3.04846	3.75519	3.42909	4.87151	2.79338	4.96578	7.06317	6.77009	5.01981	4.64128	3.46322	3.77226	3.2654	3.38602	2.59535	1.25
146	3.24392	2.82892	1.6718	4.30927	3.27816	2.51407	2.07882	1.71995	1.28702	1.01409	1.38108	1.49826	1.44602	1.94455	3.45941	2.64221	3.61591	2.71932	4.15235	2.21238	4.41421	1.55113	2.67674	2.34796	3.52216	3.83779	3.82809	2.77361	3.99784	6.01376	6.05253	5.83855	4.76126	3.31801	3.95134	4.24463	3.1698	2.98566	2.35661
147	3.29894	2.65307	1.66152	4.49389	3.28283	1.29201	1.88427	1.76046	1.57772	1.02012	1.43665	1.71053	1.56264	1.92751	3.60525	2.52489	3.15795	2.66643	5.14287	3.82566	4.67875	1.62551	2.51465	2.17978	3.31244	3.76864	4.62526	2.5209	4.74996	6.39747	5.28054	4.92955	5.48878	3.01297	4.26214	3.92905	2.87438	2.5532	1.17433
148	2.7513	2.77799	1.32355	4.42149	3.54076	1.90895	1.50087	1.7811	1.41131	1.53442	1.08184	1.48014	1.36542	1.83812	2.99655	2.60546	2.93199	2.52641	4.06473	4.63468	2.83758	1.81995	1.94567	2.53439	3.66355	2.69591	3.61821	2.02643	4.64596	6.01619	6.33953	4.77653	4.56324	3.21356	3.82401	3.42309	4.27134	3.21381	0.506523
149	2.83967	3.08661	1.37474	4.2378	2.99538	2.43422	1.88752	1.4317	1.36625	1.43331	1.47255	1.67738	1.45821	1.49656	3.0876	2.72321	3.51694	3.04641	4.79557	2.06775	3.148	2.55358	2.0677	2.59074	3.2267	4.11866	4.67515	1.90503	4.9999	6.29775	5.22691	4.09559	5.90973	2.28463	4.55432	4.3894	4.1835	2.9542	2.0285
150	2.72606	2.54379	1.3941	4.47067	3.55741	2.50194	2.26331	1.55254	1.54317	1.33337	1.12476	1.76623	1.65495	1.89032	3.15924	2.11407	3.08219	2.48733	3.87317	2.13826	3.26473	2.01607	2.85457	1.85599	3.86579	3.37076	4.19907	2.3019	3.35449	6.45455	6.16248	4.22532	4.78214	2.65802	3.99889	3.58137	3.23332	1.78416	1.63963
151	2.82488	2.51643	1.94063	3.73538	3.30934	2.30518	1.6293	1.15061	1.41743	1.59599	1.27749	1.64214	1.53046	2.01515	3.16037	2.26029	3.28488	2.78515	4.15213	3.07487	4.74348	2.02431	2.54185	2.17214	3.76314	4.23941	4.23685	3.31078	4.74922	6.36191	6.03704	5.51336	5.62066	2.75415	3.63403	4.6209	2.41689	3.05002	1.91525
152	2.35286	2.68706	0.978121	4.32561	3.0294	2.47824	1.95655	1.57431	1.23215	1.35251	1.43092	1.69387	1.51408	1.87165	3.34002	2.26751	3.29869	3.19466	4.48958	3.6871	3.4678	1.66881	2.21511	2.81068	3.94037	4.57049	4.09561	3.13424	5.14953	6.62011	5.05676	4.75221	4.89525	3.33579	3.52169	4.99124	3.64401	3.34963	1.35066
153	2.69834	2.83691	1.44714	4.21412	3.32217	1.85545	2.05092	1.39422	1.27783	1.76281	1.02814	1.62747	1.25985	1.71921	3.43562	2.52622	3.43601	2.63528	3.25982	2.54464	5.00019	1.82121	2.64502	2.52513	3.3481	3.95183	3.25038	2.31141	1.92794	6.00277	5.11744	3.82656	3.96059	3.25043	3.59106	3.6815	2.53632	1.15899	0.941036
154	2.55898	2.30026	1.42007	3.56457	2.60522	2.81929	1.74668	1.68585	1.64736	1.66861	1.1792	1.59945	1.69225	1.84587	2.95948	2.22805	3.21896	2.6267	3.98301	2.27978	3.06586	2.07953	2.04953	2.76316	4.28198	3.95339	3.9136	2.33447	3.62246	6.23157	5.86281	4.65353	5.14659	2.56377	3.07349	4.11351	3.55535	1.85109	1.62521
155	2.6242	2.47871	1.23521	4.35064	3.175	2.28255	2.05128	1.61544	1.68621	1.16065	1.16185	1.58834	0.9049	1.73219	2.82842	1.77809	2.83971	2.96568	2.96524	3.30347	3.80796	2.42719	1.94112	1.59535	2.52528	3.20166	4.03783	2.3906	4.27059	5.80911	4.4356	4.99264	4.71573	2.28026	3.23826	2.78349	2.45661	1.5564	-0.698746
156	2.63162	2.13976	1.33249	3.55775	2.98641	0.940653	1.96525	0.993409	1.44144	1.6874	1.21369	1.35902	1.28476	0.869662	2.94395	2.5762	3.04501	2.72269	2.9193	2.17511	3.9717	1.67058	2.29947	2.70356	2.69185	3.55294	3.69323	2.33265	4.01475	4.39995	5.06832	4.27819	4.13561	2.09386	3.7732	2.62407	3.19025	2.86842	1.32192
157	2.97481	2.3278	0.981567	3.51249	3.1973	1.86309	1.92782	1.70203	1.10588	1.03476	1.36763	1.46117	1.35095	1.94498	2.47624	2.37615	3.21147	2.54777	3.69907	2.42269	2.64368	1.7881	2.4257	2.77058	3.44557	3.67471	3.96836	2.63141	3.93766	6.09581	4.70032	4.58941	4.8532	2.96308	2.11928	4.18299	2.15099	-0.150468	1.67553
158	2.29743	2.27927	1.48968	3.66561	2.81538	1.9156	1.88972	1.82411	1.35637	1.27069	1.20927	1.42581	1.53775	1.54662	2.51476	1.37072	3.09349	2.26506	3.4133	3.49728	4.01973	1.97562	1.52978	1.92655	3.25055	3.29389	3.73423	2.16608	3.62098	6.03482	5.17733	5.14892	3.68481	1.75191	2.44636	4.65706	1.85517	1.63687	0.30332
159	2.47942	2.19027	1.19573	3.78797	2.47464	2.23713	1.90018	1.7265	1.60512	1.12027	1.23139	1.27357	1.225	1.51954	2.99406	2.2561	2.57479	2.09312	3.44725	3.83526	3.47466	1.97056	2.06282	2.18946	2.80161	3.45606	4.3549	2.3708	3.97449	5.61066	4.39092	4.32339	3.34103	1.31004	3.46664	3.88889	3.04537	2.24623	0.650064
160	2.17207	2.24227	1.04973	3.9656	3.06689	2.22136	1.77448	1.49415	1.63532	1.14853	1.06201	1.52582	1.42597	1.61389	2.91451	1.74304	3.14964	2.43347	3.19574	2.99217	4.55883	0.700868	2.33846	1.72438	3.05993	2.95181	3.95437	2.10587	2.59182	5.08073	4.71834	4.14755	4.79569	-8.95002	2.82206	3.91717	3.83584	2.78378	-0.184471
161	2.34989	2.10604	1.9221	3.86543	2.67381	2.41527	1.64774	1.27205	1.31297	0.946589	1.12139	1.30771	0.822381	1.03085	3.01065	2.34649	2.82897	2.23819	2.8143	1.97769	2.88704	1.07709	1.73566	1.76719	3.8024	2.53925	2.96401	1.98816	4.16556	5.01523	5.63052	5.47042	4.98161	1.22506	3.1952	3.02348	2.03065	2.69117	0.868085
162	2.02989	2.07284	1.36639	3.56825	2.83352	1.70752	1.69929	1.1996	1.55683	0.900845	0.804327	1.19745	1.65051	1.53009	2.65782	1.90761	2.78679	2.40877	3.50106	1.84824	2.64581	1.17384	1.5276	1.81177	2.79281	3.18878	3.51181	2.39861	3.2645	5.02556	4.2288	4.36247	4.31552	2.07694	3.23758	4.05368	1.95651	2.04905	0.259469
163	2.21326	2.2346	0.474717	3.84121	2.78309	1.27469	1.54683	1.45508	1.20783	1.05424	1.12035	1.4624	0.831002	1.67034	2.5662	1.81139	2.83576	2.16651	3.78442	4.10754	2.3117	1.73517	1.66167	1.1024	2.30693	3.44711	3.30492	2.71838	3.50796	4.88995	4.53275	4.09857	4.80362	1.05699	3.33201	3.03966	1.40653	2.29397	1.10911
164	2.20885	2.67377	1.21533	3.33683	2.63353	0.826275	1.66671	1.6524	1.11296	0.643583	1.07975	1.43738	1.13993	1.69388	2.78603	1.85323	2.47017	2.04672	2.99235	2.53702	3.4853	1.51318	1.65131	2.28142	3.26506	3.23573	4.19327	2.50632	4.33008	4.62764	4.77555	4.14748	4.30879	1.27524	2.66481	2.22891	2.13287	2.4164	2.00442
165	2.3723	2.84507	1.28235	3.29279	2.13836	1.0559	1.8097	1.65647	1.2321	1.17696	1.01048	1.56612	1.5468	1.09528	2.86213	1.68451	2.89045	2.19646	3.84323	2.89267	3.89975	2.18003	1.51971	2.94853	2.86972	2.68289	3.81427	1.7021	4.41143	5.03097	5.32437	3.73717	3.53415	2.485	2.06529	3.45715	2.33895	1.79998	2.35576
166	2.27601	1.94579	1.12092	3.60236	2.94947	1.82729	1.75151	1.39773	1.21094	1.00074	0.786919	0.948076	1.21202	1.78916	2.64727	2.005	2.93645	2.04605	3.14134	1.45608	3.85674	1.49973	2.43739	1.82278	3.07138	2.32308	2.23147	0.523954	4.34465	3.9909	4.95381	3.86694	4.52457	1.89899	3.86676	3.47036	1.48095	2.07161	-0.0875722
167	2.48182	2.16117	1.29435	3.07513	2.48436	1.90938	1.4725	0.99393	1.05239	1.29631	0.958475	1.49163	1.42808	1.63628	2.66897	2.31086	2.33523	1.75744	2.29355	3.0146	3.15633	0.710903	1.46285	2.50892	2.41457	3.41737	3.39152	1.56102	4.02969	4.40578	4.89561	3.51115	3.91046	0.45626	2.25793	3.92509	2.52159	2.12321	0.604547
168	2.14158	2.56602	1.06686	3.54788	2.66096	0.71468	1.5717	1.44402	1.03165	1.02211	0.724695	1.33648	1.01463	1.45355	2.6834	1.7773	2.8973	2.02426	3.17253	3.95152	3.55274	1.64825	1.71609	1.8881	2.63442	3.08302	3.17129	2.74509	3.01879	4.76633	4.47077	4.64778	3.56103	1.70322	2.61806	3.14271	2.22645	1.43018	1.35146
169	2.51	2.09333	1.13095	3.3339	2.5821	1.97894	1.77529	1.61781	1.28889	0.988032	0.902973	0.97032	0.886929	1.32351	2.67733	1.66064	2.00556	1.87176	2.7066	1.70463	3.77653	0.561594	2.54895	2.40055	3.18655	2.83027	2.93159	1.4382	4.01926	3.69829	4.31198	4.21527	4.63653	1.08881	2.4739	3.46368	2.59981	1.24388	0.160683
170	1.99268	1.85359	1.34309	3.50187	2.66501	1.64024	1.57785	1.42462	0.9168	1.05315	0.884265	0.636722	1.13416	1.51465	2.28659	1.61429	2.98917	1.95208	3.05168	2.49377	3.06985	0.619972	2.0659	1.14752	1.88613	2.93464	3.14693	2.08068	1.93507	5.06881	4.36734	2.61272	4.06007	1.7389	0.470572	2.61541	2.04756	1.80938	1.27236
171	2.22394	2.30701	1.58143	3.61065	2.62495	0.750845	1.41176	1.00638	0.392052	0.781084	0.945852	1.12968	1.10216	1.21283	2.34566	2.09865	2.5914	1.94651	2.20008	2.15556	3.66679	1.52341	1.91397	1.90602	3.2324	2.79911	3.10582	2.09554	2.75539	3.74026	3.33466	2.85631	4.03018	1.16064	3.17675	3.27851	2.84971	0.956732	0.454464
172	1.80542	1.76369	1.13491	3.26553	2.376	1.42256	1.50798	1.18525	1.09939	0.808977	0.819716	0.945863	0.970629	1.2165	2.00915	1.80125	2.72203	1.81761	2.18126	2.30092	2.90457	1.30258	2.31166	1.42781	2.26919	2.14283	3.35988	2.16864	3.13397	3.91417	4.54146	3.55201	3.43613	1.6095	2.05398	3.15315	1.98183	1.95601	1.46133
173	1.9224	2.03241	0.709876	2.81281	2.50449	0.477568	1.54045	1.35081	1.04743	1.43192	0.557462	1.02133	0.538653	1.19996	2.44568	1.70119	2.40039	1.51725	2.43263	2.95998	2.76855	1.27182	1.61759	1.19617	2.10803	3.19568	2.6678	2.69336	2.6419	4.44009	2.17936	4.0856	3.49074	0.654094	1.69892	3.53218	1.7285	0.563454	-0.0938305
174	2.06571	1.87276	1.29822	3.10615	2.13436	2.0842	1.7744	1.05187	0.835878	0.49605	1.11096	0.904219	0.694203	1.18982	2.15615	1.98507	2.50673	1.92596	2.53195	2.56959	3.85464	1.31767	1.39623	1.17034	2.32498	2.94325	2.28257	1.7311	3.03933	4.25992	3.81547	4.00316	3.29153	1.73516	2.49418	2.81478	1.52579	1.59682	0.10149
175	2.19485	2.075	0.763682	3.24854	1.9574	1.92374	1.64913	1.45707	1.10907	0.917267	1.0221	1.24857	1.00676	1.27168	2.02754	1.52331	2.33671	1.84959	2.50108	2.85251	2.62512	1.27117	1.5552	1.21197	2.92137	2.22733	3.35952	1.23729	3.27658	4.20173	4.13639	3.88302	3.57691	2.38907	2.4857	3.20147	2.03079	1.31126	1.75224
176	1.64309	1.52928	1.36079	3.12734	1.98139	1.76529	0.921214	1.49609	0.978694	1.04239	0.969595	0.981441	1.09033	1.10291	2.35653	1.89995	2.38513	2.16604	2.45737	2.79514	3.01775	1.29323	1.85448	1.05388	2.03343	2.66842	2.17289	2.1728	1.72507	4.15857	4.49062	3.08496	2.8237	2.11596	2.85386	3.41712	1.64238	1.33084	0.0140182
177	1.62472	1.75051	1.17955	3.09216	2.25402	0.712285	1.63882	0.959284	1.01119	1.00998	1.0758	1.08998	0.84981	1.19376	1.68001	1.36496	2.31667	1.95455	2.18098	2.00836	2.96334	1.15859	1.76705	1.29759	1.98963	2.46105	2.24285	0.802438	2.90729	4.83905	4.07201	3.20131	3.93716	1.4737	2.23855	3.34615	2.4086	0.916877	0.681976
178	1.67449	1.95074	1.17051	2.88713	1.92862	1.89692	1.76149	1.2531	0.917762	1.07026	0.952271	1.1731	0.898879	1.25931	2.14667	2.05818	2.32048	1.91417	2.26274	2.69956	3.36358	0.596904	1.55872	1.16304	2.06849	2.78775	1.91782	1.32871	2.94475	4.23447	5.11644	2.97913	2.8038	1.78352	2.65575	3.41916	2.46663	2.55178	0.327387
179	1.56833	1.90983	0.796793	2.98659	2.22533	1.40863	1.51174	1.40841	1.18052	1.20685	1.19263	0.540847	1.07048	1.23009	2.4313	1.75633	2.19564	2.217	2.69776	2.49205	2.7555	1.21655	1.54488	1.66895	1.83605	2.28733	3.66491	2.4622	2.53349	3.82563	3.09412	3.68656	3.67846	1.01069	1.53777	2.12877	2.36188	1.9792	0.386461
180	1.69199	1.91044	0.960277	2.8758	2.10166	1.70825	1.5399	1.05908	1.02342	1.32145	0.629921	1.00183	0.574053	0.869829	2.05411	1.62671	2.62043	1.62899	2.92405	1.70097	1.11124	1.95358	1.90283	1.55362	1.58302	3.92944	3.08507	1.24253	2.92983	3.2508	3.5405	3.49664	3.42609	1.31612	2.16821	2.27804	1.29427	1.41353	-0.262113
181	1.83766	2.00182	1.08471	2.50809	1.88465	1.51562	1.5007	1.2151	1.08494	0.598133	0.770718	0.840127	1.23492	1.11323	2.07552	1.36429	2.27863	1.55191	2.12128	2.05532	2.4469	0.481145	1.82601	1.05196	2.06161	2.95762	3.23186	2.02363	2.92741	3.60698	3.16852	2.89906	3.27852	2.05346	1.78094	1.52976	2.04285	1.31638	1.31418
182	1.74028	1.96917	1.28952	2.97678	1.78332	1.30721	1.439	1.39995	1.15325	1.01771	1.07864	0.943166	0.832207	0.950855	2.1935	1.44141	2.07595	1.85105	2.17611	1.33912	2.23997	1.25385	1.43503	0.981046	2.36385	2.88575	2.70079	1.66524	1.87967	3.28529	2.34663	2.77653	2.97636	1.44674	2.09286	2.53988	2.44901	0.889177	-0.552766
183	1.63846	1.80947	0.633481	2.6246	1.71402	1.46206	1.56052	1.51813	1.01382	0.477683	0.885262	0.86962	0.935315	0.915571	2.15625	1.33699	1.69396	1.37586	3.18347	1.34741	2.7736	0.298844	1.27672	0.393963	2.05742	2.15086	2.86323	2.22023	0.0483755	3.45977	4.60092	3.47019	2.86448	0.957819	2.23281	2.72851	2.171	0.554734	0.58829
184	1.62156	1.23713	1.15318	3.1959	1.72941	1.41642	1.59889	1.44311	0.978198	0.472804	0.621311	0.818157	0.938015	0.976315	2.07526	1.2165	1.65656	1.80673	2.42771	2.0106	2.98951	0.601205	1.51923	1.44377	2.11068	3.43961	2.66364	2.74051	3.10742	3.57498	3.28448	2.79205	2.80499	1.86174	3.14046	2.00859	1.86307	1.40742	0.0765659
185	1.92019	1.50293	1.27298	2.48405	1.92868	0.0819021	1.44822	1.08359	1.23153	0.880696	0.706509	1.0929	0.817142	1.10933	2.18095	1.14797	1.64645	1.37116	2.20066	2.37647	2.76996	0.648915	1.93406	1.7593	2.77846	2.81276	2.42939	2.6524	3.16515	2.57771	3.84207	2.33025	1.98047	1.38735	1.90509	2.66915	1.73795	1.60628	0.556225
186	1.18738	1.51055	1.33631	3.32901	1.65005	1.52444	1.3216	1.17585	0.832451	0.47972	0.583058	1.0232	0.971383	1.08093	1.88637	1.38363	1.95153	1.91546	3.19682	1.6329	3.91794	1.21541	1.31377	1.20552	2.00342	2.96883	2.31325	1.60938	3.13475	3.47849	4.29574	2.22585	3.42459	1.3415	2.04715	2.10036	1.31641	1.31137	1.53571
187	1.55077	1.64404	0.631416	2.50023	1.88118	0.459805	1.37851	0.619346	0.756203	0.571369	0.152693	1.25027	0.0767675	1.1899	2.1364	0.695579	2.08964	1.40727	1.63932	2.05139	1.78046	0.424634	1.42599	1.2003	1.89956	2.664	2.46155	1.72879	1.42619	3.35661	3.89255	2.62769	2.98091	1.73345	1.92956	2.56606	1.05372	2.16853	0.793619
188	1.57523	1.46604	0.635717	2.40696	1.84269	1.27178	1.24905	0.937771	0.872987	0.822843	1.01328	0.703495	0.804098	1.05517	1.13285	1.137	2.05118	1.29379	2.54665	3.06428	0.4864	0.543455	1.46244	1.09479	1.60542	2.46741	2.89839	1.4762	2.60904	3.60472	4.17595	2.9344	2.77245	1.04584	2.4325	2.18333	0.674308	1.41678	1.3832
189	1.63064	1.32914	1.22744	2.44017	1.72047	0.241158	1.33937	1.33947	0.582138	0.53886	0.684704	1.00428	1.03998	0.844486	1.80239	1.46744	2.25614	1.32962	3.23512	1.62984	1.36213	1.05253	1.54277	0.709522	1.80914	2.37743	3.12998	1.80274	2.28888	3.23545	3.319	2.15892	2.68344	2.38226	2.49889	2.9262	1.67076	0.260206	0.205395
190	2.20326	1.26849	0.84524	2.4663	1.54629	1.82154	1.41384	1.2409	0.459146	0.741205	0.795239	1.03878	0.826832	0.945202	2.06162	0.997574	1.34599	1.34297	2.08819	2.18845	2.39676	0.929852	1.06999	1.54839	1.90912	2.29313	3.19674	1.49315	1.62278	4.04872	3.19505	2.32232	2.94578	2.29475	1.79231	1.62139	2.42421	0.819845	-1.1028
191	1.80366	1.47339	0.545582	2.35119	1.96889	1.82841	1.34987	0.889854	0.808448	0.847959	0.968532	0.960552	0.957631	0.981913	1.66497	1.30775	1.85542	1.29519	1.4089	0.874633	2.01912	0.323644	2.02704	1.79497	1.43212	1.87327	1.76687	1.60161	2.49831	4.30597	2.83545	2.46723	3.19226	1.06916	2.28548	2.86268	2.34503	0.746708	1.49875
192	1.80564	1.77551	0.402863	2.70924	1.1766	1.37688	1.45182	0.943535	0.599904	0.631733	0.901779	0.985869	0.534177	0.903914	1.94344	0.827543	1.72697	1.00331	1.81857	1.66055	1.33764	0.23791	1.27732	1.25043	1.60803	2.48746	2.33881	2.40081	3.18667	3.3874	3.58277	2.11593	1.7743	2.03921	1.99583	2.53624	0.746186	0.561986	-0.455144
193	1.65831	1.44693	0.543061	2.76119	1.53538	1.25987	1.37396	1.1268	0.827611	0.66708	0.500126	1.09949	0.588466	1.03448	1.9733	1.40824	2.2947	1.58028	3.54631	1.78589	2.81756	0.632459	1.80953	0.411724	0.436906	1.8324	1.18439	1.70021	2.72399	2.90417	3.3056	2.08975	2.97542	1.54747	1.42193	1.16485	1.72962	0.815963	0.202523
194	1.14962	1.57592	0.976126	2.76941	1.69663	0.3223	1.42525	0.925192	0.6428	0.675965	0.2386	1.08671	0.633624	1.24693	1.76375	1.73984	2.10013	1.38002	2.39674	2.76892	2.85862	0.565578	1.69514	0.827116	0.940136	2.20671	2.73865	2.7828	3.38936	3.55368	3.54238	0.955395	1.98989	1.35161	2.41744	1.96337	0.892437	0.969915	-1.72872
195	1.70096	1.60846	0.900269	2.65066	1.5111	1.23932	1.31227	0.791618	0.974546	0.678148	0.260836	1.02839	0.732395	0.881618	1.6013	1.43748	2.23387	1.53003	3.4386	2.53177	2.65776	0.459797	1.98039	1.21091	1.71863	3.09686	2.48207	1.95218	2.38242	1.81694	4.35544	2.45402	2.74363	0.757632	1.60322	2.56385	1.89876	1.617	-0.910241
196	1.81623	1.62645	0.872663	2.41989	1.59019	0.980083	1.09486	0.930726	0.207481	0.616052	0.587461	1.18172	0.788222	1.21254	1.48166	0.853775	1.68246	1.36158	1.9036	1.52434	2.32622	0.107539	1.29254	1.13032	1.61244	2.5273	1.60018	1.43828	3.0146	3.27059	3.45609	2.79755	2.21423	0.912835	1.91005	2.37495	1.30291	0.961195	0.509016
197	0.941814	1.59127	0.927052	2.29715	1.04882	1.01557	1.24236	1.19879	0.782385	0.344495	0.570823	0.963367	0.835382	0.891067	1.52535	1.49152	2.04334	1.22265	1.93868	0.879712	2.09837	0.857935	1.70473	0.980973	0.737382	1.42943	1.68334	1.99093	0.49411	2.8869	2.79857	2.02764	2.70433	0.882232	1.42668	2.09561	1.42421	-0.0906286	0.232608
198	1.28179	1.52517	0.832432	2.42475	1.47147	0.967818	1.06281	1.01661	0.775577	0.548707	0.688826	0.858106	0.980394	0.822056	1.87056	1.01078	2.01242	1.63484	2.04151	1.75011	1.47391	0.785067	1.78093	0.979993	1.00247	3.0738	2.31774	1.78266	1.28436	3.63803	3.17842	2.5148	3.3254	0.808111	0.531538	1.44696	0.936434	1.1098	0.498429
199	1.10528	1.14557	0.899838	2.29862	1.36073	0.234904	0.936366	1.17174	0.581191	0.55864	0.547342	0.695098	0.220406	0.644696	1.74348	1.04026	1.97303	1.38961	2.58537	1.65	2.16692	0.983649	1.50177	1.09055	0.594624	1.72331	1.45893	1.99183	2.91216	3.56062	4.08521	1.75352	2.64719	1.36691	1.32767	1.6714	1.69759	1.32293	0.169407
200	1.69863	1.31071	0.868678	2.20781	1.31073	1.38849	1.20386	1.25691	0.820472	0.484759	0.455869	0.728728	1.19802	0.960213	1.35988	1.2662	2.3969	1.41455	2.24645	2.44345	2.82194	0.470429	1.15528	0.981914	0.3724	2.00544	2.23645	2.04867	2.58746	3.43078	3.0344	2.65934	2.26093	1.31428	3.33456	2.04528	2.20158	0.682649	-0.253696
201	1.79405	1.5197	1.09524	2.12522	1.35083	1.92767	1.18519	0.978083	0.82689	0.877475	0.792507	1.15346	0.89471	0.895044	1.35367	1.083	1.93921	1.62007	3.51342	0.964479	2.74593	0.101999	1.2515	1.23083	1.21102	2.8492	2.90549	1.53604	1.95798	3.83272	3.58178	2.232	2.62445	1.85348	1.78591	1.5487	1.54225	0.9922	0.10284
202	1.29485	1.28977	0.729425	2.40183	1.31637	0.711038	1.14465	1.24194	0.65033	0.518066	0.497407	0.991325	0.595392	0.754081	1.14856	1.10149	1.47804	1.25964	1.40626	1.6065	1.67863	0.545951	1.45181	1.47809	2.14659	1.98017	1.78213	0.879871	2.23732	2.11659	3.37521	2.14403	1.13637	1.81819	2.44314	1.74091	1.04887	1.1349	0.192371
203	1.41973	1.20639	1.07337	2.53884	1.98498	1.63209	1.44463	0.884454	0.551717	0.853335	0.915924	1.0444	0.264788	1.05553	1.42284	0.973359	1.75363	1.44639	1.70299	0.970162	2.05151	0.355825	1.99126	0.93226	1.65244	2.04114	2.28498	0.490026	2.24141	3.32968	3.3301	2.01403	1.24294	0.669422	1.35991	2.58157	1.28423	1.32075	0.574165
204	1.34718	1.42741	0.805098	2.52547	1.17005	0.989431	1.07483	1.27268	0.631828	0.335903	1.03421	0.959012	0.636627	1.00508	1.46765	1.2584	1.9319	1.51926	2.33868	2.15235	2.54813	0.722168	1.55945	0.860657	1.22072	1.58399	1.35398	2.00601	2.79883	3.39209	3.37125	2.48448	2.66104	1.06506	1.06393	2.38887	1.08905	0.812886	-0.355643
205	1.61088	1.08543	0.567468	1.96753	0.930124	1.28126	1.16577	1.14798	0.415168	0.814164	0.507558	1.0017	0.840345	0.899968	1.45084	0.341949	1.70503	1.34515	2.10412	1.34488	1.90153	0.516173	1.34407	1.1911	1.65702	2.54163	2.10495	1.84834	1.24574	3.07307	3.90128	1.88772	1.96807	1.57277	1.09534	1.74909	0.528352	1.91703	0.146069
206	1.61902	1.08247	0.776541	2.94169	1.2965	0.762448	0.897791	0.695927	0.639088	0.579054	0.46076	1.23519	0.565138	0.289763	1.8025	1.1218	1.60458	1.15702	0.779644	2.63995	2.29998	0.0128827	0.866219	1.14019	1.39642	2.3619	2.82661	1.36302	2.22448	2.12923	3.41959	1.34862	3.034	1.63609	2.0414	1.58373	2.07819	0.973624	0.161651
207	1.41438	1.72559	1.01763	2.5776	1.45551	0.949603	1.05243	0.916957	0.564974	0.14518	0.397483	0.958621	0.709228	1.00468	1.66671	0.776371	1.48979	0.84101	1.6172	1.51243	2.32713	0.405409	0.963414	0.808638	0.709484	2.71325	2.25753	2.00728	1.5017	3.01881	3.22549	1.83412	1.93577	0.273985	1.8607	1.37544	0.967613	1.11434	-1.34273
208	1.85262	0.698658	0.920945	2.53294	1.02748	0.28118	1.22515	1.03027	0.678797	0.16104	0.338631	0.515214	0.728043	0.857183	1.51731	1.29124	1.9497	1.29857	2.04237	1.68144	2.30914	0.742703	0.69589	1.10171	1.7081	2.19193	2.85223	2.21816	2.33109	2.67246	2.96253	2.82686	1.89473	1.4224	1.23141	1.64085	2.15937	0.196738	0.895783
209	1.2596	1.63963	1.01971	2.75101	0.998604	1.25721	1.00209	0.92586	0.495655	0.458335	0.320895	0.825075	0.833058	1.05806	1.60091	1.10867	1.87655	1.12443	1.28801	0.575667	1.50891	0.79654	1.33915	0.688253	0.377108	2.43156	2.62989	2.21757	2.34298	2.58221	1.72061	2.5952	2.75009	1.18547	1.51231	2.52661	0.817427	0.511973	-0.765949
210	1.25583	0.986889	1.20545	2.6962	0.986488	1.03425	0.949955	1.01191	0.711413	0.209971	0.450034	0.80138	0.762549	0.591643	1.24195	1.44946	1.88596	1.30682	1.75902	3.01564	2.68872	0.93159	0.918967	1.06156	1.72446	2.00244	2.69457	2.3291	2.29978	3.64198	3.29567	2.65533	2.38109	0.610682	1.27057	2.29969	1.17185	1.37732	0.159198
211	1.60347	1.50196	0.957698	2.19167	1.42313	1.45388	0.711043	0.844275	0.840778	0.546969	0.662102	0.843216	0.761072	1.18972	1.54643	1.02163	1.6065	1.39215	1.92516	1.17207	0.820957	0.314695	0.951956	0.846803	1.58587	2.10506	1.70602	1.07045	1.46134	2.40664	2.22056	2.46524	2.36909	0.656676	2.62599	1.81644	1.4114	1.55917	-0.700619
212	0.985253	1.33304	1.20621	2.57719	1.15352	1.44096	1.16146	1.23481	0.389842	0.558579	0.0802176	0.525273	0.595299	0.862851	1.25458	0.80478	1.45613	1.01352	1.73387	1.54665	2.95794	0.297833	0.843848	0.823198	1.65103	2.07696	1.03776	2.34289	2.66372	2.39976	3.19273	2.60043	1.65996	1.41122	2.06241	1.8576	1.82972	-0.00236743	-1.28503
213	1.43218	1.1692	0.982422	2.6386	1.31001	1.4215	1.16356	1.27059	0.705371	0.534349	0.543792	0.782461	0.89295	1.21945	1.79741	1.10185	1.16078	0.832837	2.09643	1.41084	2.11303	0.127988	0.592468	1.326	1.31332	2.24144	1.14903	2.40191	2.53266	2.30021	2.60067	3.82747	2.03197	2.15957	2.11811	1.46436	1.70409	0.43768	-0.494993
214	0.86282	1.20174	1.04905	2.11183	1.43792	1.50137	0.962129	1.09843	0.674273	0.371284	0.749522	0.722594	0.215222	0.908113	1.31975	1.2891	1.5646	1.36666	2.37736	1.12484	1.85151	0.850679	1.0763	1.07992	1.28441	2.487	1.97016	1.23211	2.7793	3.80028	2.07397	2.2836	1.81705	0.323536	2.10504	1.10488	1.07308	1.06923	0.941533
215	1.8768	1.34325	0.333645	2.47801	1.59705	1.28803	1.00256	1.20025	0.555625	0.482651	0.553477	0.893841	0.480906	0.270792	1.24535	0.851557	1.83686	1.02851	2.30479	1.7566	2.40992	0.842898	1.25216	1.28684	1.39609	1.27531	2.46979	1.98023	1.96402	2.49269	3.6132	2.21717	2.75722	0.0627741	1.40543	2.02409	1.63677	1.13787	0.161098
216	1.1876	0.566484	0.956165	2.46262	1.09881	1.26377	1.08985	1.38773	0.700741	0.121922	0.453078	0.358576	0.232739	0.990393	0.860858	1.00368	1.64302	1.07708	2.44071	2.32725	2.4665	0.711098	1.28267	1.12127	0.646176	1.65666	1.40893	1.86986	2.30344	0.996059	3.95532	1.92426	2.10705	1.86244	1.11846	1.65487	1.39197	1.11119	0.227345
217	1.38079	1.46702	0.874912	2.41022	0.853959	1.31182	1.14693	0.827666	0.524528	0.386968	0.171413	0.681166	0.507384	1.31358	1.21983	1.35947	1.20087	1.18506	1.93093	0.76541	2.00044	0.764162	1.01079	1.24312	1.44357	2.11601	2.38085	1.86821	2.34745	2.21883	2.55705	2.67871	1.79515	0.434118	1.76504	2.41195	0.71011	0.674897	0.817698
218	1.11494	1.11775	0.354454	2.69863	0.973731	1.44317	0.939984	0.705162	0.413485	0.567813	0.547311	0.593613	0.719837	0.842953	1.46012	1.38282	1.40339	1.49786	1.56427	1.43705	2.98855	0.375706	1.18669	0.670817	-0.0123797	2.37591	1.35823	2.19963	2.6712	1.9314	3.76975	1.9062	2.21507	1.00564	1.13756	2.20976	0.314447	0.864155	-0.53385
219	0.72857	0.956172	0.760224	2.34281	0.712779	1.18744	1.14901	1.03099	0.299917	0.223813	0.648454	0.966852	0.249445	0.717823	1.41107	1.0427	1.7581	1.26036	1.17628	1.79837	1.33148	0.494299	0.529227	1.25915	1.5458	1.63015	1.78823	1.52429	1.84962	2.811	2.6607	2.32492	1.92773	0.65447	1.21959	2.60288	1.23896	1.61909	-0.566454
220	1.06228	1.03524	0.833464	1.9088	1.4111	1.80317	1.06286	0.54092	0.741999	0.438131	0.589593	0.331762	0.868342	1.2499	0.770159	1.31265	1.89707	1.44409	2.13156	0.247197	-0.741487	0.882822	1.436	0.965198	1.18514	1.36156	1.96354	0.546526	3.01646	2.58125	3.02871	1.50048	2.60018	0.536188	1.65128	2.16674	0.33457	1.41663	-0.451358
221	1.14416	1.14708	1.17371	2.36697	1.35428	1.06309	0.779218	1.06784	0.893037	0.466881	-0.73465	0.551297	0.0168247	0.769784	1.24038	1.19926	1.62781	1.5218	1.36396	1.18435	0.517832	0.0844133	0.875631	0.799471	0.123016	1.49205	1.26652	0.899514	3.0396	0.971311	3.88278	2.34805	1.82866	1.71128	1.16456	2.42917	0.543648	0.865594	-0.424904
222	0.93607	1.0938	1.15218	1.71299	1.05026	1.20091	0.849417	0.837995	0.583581	0.314212	0.447712	0.520212	0.57662	0.37638	1.12288	0.95493	1.80989	1.33825	2.06326	1.39304	1.55721	0.143464	1.14103	0.827118	-0.313304	1.98173	1.79186	2.01843	1.88258	2.11582	3.36169	2.12455	1.74506	1.32774	1.84517	1.80392	1.92412	1.14963	-0.539999
223	1.09124	1.03359	0.81498	2.30757	1.13009	1.03085	0.735117	0.860385	0.448971	0.327751	0.279588	0.68732	-0.205229	0.890504	0.994007	1.11829	1.83055	1.24376	2.8267	1.33345	1.73671	0.659175	0.772985	0.778143	0.201869	1.30465	-0.134175	1.79715	2.31616	3.26764	4.075	2.47529	1.76067	1.80246	0.846847	1.75022	-0.0888076	1.69624	0.196028
224	1.00417	0.956425	0.510228	2.15175	1.01914	1.4074	0.728308	0.681318	0.838283	0.659419	0.4873	0.51446	0.532836	0.923449	1.04951	0.694289	1.58681	1.09429	2.40426	0.189737	1.61478	0.0800042	0.847244	1.04049	1.23407	2.35366	1.37095	2.27815	3.23716	2.32364	3.00185	2.35339	1.29022	1.01835	0.630367	1.22893	1.24602	0.510389	-0.430929
225	0.774412	0.867418	0.703256	2.02272	0.935802	1.52023	0.774075	1.19931	0.697179	0.511821	0.458088	0.422424	0.600044	0.937167	1.19615	1.10583	0.955067	1.10506	2.93179	0.894784	2.69182	0.364593	0.645207	0.773371	1.22583	2.37594	1.59837	1.77526	2.64198	1.98575	4.21113	3.00634	1.94892	1.6459	0.381912	1.67833	1.25333	0.521571	1.22201
226	0.97429	1.10831	0.890647	2.48514	1.17058	1.16077	0.964723	1.08702	0.454818	0.188781	0.712641	0.462356	0.339924	1.01755	1.23692	0.969871	1.68637	1.17634	3.17401	1.00895	0.778135	0.609604	0.795794	0.651959	1.08457	2.16575	0.923851	0.175349	2.40211	1.58421	1.78906	1.65163	2.08429	0.570555	1.3983	2.05828	0.212483	-0.43923	0.867291
227	1.12608	1.0083	0.71286	2.1676	1.02663	0.942046	0.95238	0.887929	0.862586	0.503955	0.593812	0.437784	0.61581	0.678743	1.37585	1.18988	1.27025	1.01744	0.78162	0.435838	2.77945	-0.0257444	0.918113	1.13528	1.0683	2.37293	1.24287	1.98934	1.71982	2.19971	4.25455	1.25723	1.59309	0.777934	0.683979	1.04618	0.167666	0.804488	-0.336594
228	1.28758	1.09326	1.19948	1.76239	0.986158	0.986649	0.889184	0.897422	0.494557	0.408554	0.764689	0.825007	0.508646	1.01255	1.15875	1.00602	1.20323	1.21029	2.69868	1.24573	2.75274	-0.081745	1.18898	0.742369	1.15099	1.67545	0.725239	1.44856	2.3139	1.87533	2.65075	2.39834	1.91991	0.17138	0.297819	1.56596	2.29408	-0.310514	-0.0264856
229	1.34362	0.729878	1.12515	1.73832	1.301	0.856826	0.886958	0.980852	0.863563	0.764185	0.75121	0.825999	0.753448	0.853366	1.17918	0.985839	1.44514	1.10816	1.0118	2.38934	1.56651	0.470021	1.02854	1.00248	0.617118	1.99298	1.40152	2.37856	3.06987	2.49645	2.74379	1.03861	2.27736	1.14688	1.17795	2.29291	0.448153	0.596373	0.696505
230	1.46354	1.12717	0.871827	2.21932	1.1645	1.2668	0.66927	0.960775	0.790276	0.544957	0.173991	0.781793	0.541253	0.952185	1.24076	1.11823	1.43629	1.26726	1.48767	1.4506	1.21572	0.290804	0.644462	0.825727	0.770655	1.49487	1.58187	2.25989	0.744602	1.96085	3.3153	2.57397	1.52549	1.54222	1.25863	2.04816	0.892802	1.20173	0.862793
231	1.12359	1.05995	0.319943	2.02601	0.761962	1.6887	0.801726	0.864933	0.502163	0.502394	0.542545	0.0888329	0.47491	0.57942	1.56028	0.581883	1.47866	0.967631	2.28351	1.50827	2.51794	0.0979723	1.29903	0.664238	0.284952	1.53053	0.60937	1.73205	1.94766	1.98391	3.50949	2.94194	2.78016	0.693224	-0.702676	1.3968	0.678064	0.087888	-0.751392
232	1.02042	0.336029	0.739497	2.08973	0.125501	1.05306	0.866183	0.893509	0.277266	0.642643	0.636594	0.213978	0.542562	1.10485	1.48167	1.31525	1.25568	0.958037	1.17363	0.412595	1.40354	0.0449292	1.22381	0.728712	0.700437	1.81955	1.1386	1.72632	2.80055	1.22566	4.15126	1.64829	1.58427	0.840402	0.652828	1.0375	0.31845	1.21507	0.719033
233	0.915825	1.16325	0.920489	1.68599	0.778799	1.08773	0.473772	0.812602	0.72748	0.574967	-0.000364407	0.615214	0.0892574	0.809482	1.43378	1.32661	1.09885	1.23142	1.14995	1.04387	1.1967	0.720758	-0.199552	0.477874	1.55576	1.37276	1.49533	2.61616	2.53928	1.33122	2.61331	1.28958	2.11306	0.428705	0.0141195	1.83185	1.08909	0.829324	0.582286
234	1.29042	0.817532	0.7912	1.80465	0.7942	1.42103	0.705426	0.791132	0.701403	0.613774	0.509933	0.77578	0.210441	0.0791461	0.897578	1.00088	1.18173	0.94706	1.08621	1.80521	1.63521	0.239297	0.498274	0.320468	0.408771	1.65877	0.503776	1.60425	0.755492	2.26469	2.54671	0.557383	1.55641	1.22559	1.49249	0.978387	0.977731	1.02458	0.995688
235	1.32281	0.0894039	0.506991	1.9561	1.0102	0.546706	0.640292	1.06977	0.0419086	0.2971	0.375371	0.804811	0.415417	0.905275	0.990661	0.885248	0.909203	0.728741	0.860151	2.04592	1.79155	-0.372183	0.980533	0.902475	0.281395	2.49516	-0.0387547	1.99941	2.19054	1.81719	2.44837	1.70185	2.20291	0.424074	1.67757	1.97482	0.154411	0.391527	-0.512606
236	1.0653	0.732587	0.387217	1.46636	0.899919	0.838888	0.492578	0.936168	0.516637	0.325055	0.24787	0.567094	0.0337484	0.584903	1.4605	0.87055	1.23169	0.834098	2.24424	0.0233947	1.96059	1.03057	0.770955	0.494609	1.41347	1.66017	1.45993	1.99454	2.33589	2.17183	2.48942	2.31282	1.68746	1.26783	1.10756	1.32732	-0.328606	1.08132	0.530641
237	1.05645	0.715997	0.176154	2.00268	0.692723	0.855774	0.537334	0.648562	0.455058	0.288845	0.397189	0.607792	0.472778	0.439495	0.253834	1.25164	1.29901	0.877497	2.34221	0.531852	1.34261	0.719199	0.772938	1.37137	1.03078	0.128145	1.23736	1.37507	2.51796	2.2034	3.07794	1.18011	2.33479	1.75531	1.73133	1.02786	-0.332673	-0.322825	-0.524142
238	0.876666	0.82452	0.131356	1.35841	1.37719	0.931741	1.00267	0.64321	0.183493	0.433942	0.406546	0.328282	0.417434	0.852888	0.729572	1.3559	1.59032	1.239	2.16672	1.64533	1.47547	0.0735887	1.01171	1.20661	0.942341	1.11999	0.723677	0.564916	1.04528	0.321996	3.36161	1.65479	1.77426	1.24941	1.69316	0.789179	-0.362928	-0.526332	1.33761
239	1.07973	0.796414	0.232329	1.51509	0.542003	1.37131	0.738295	0.747596	0.31905	0.503315	0.332024	0.538046	0.591116	0.697602	1.31493	0.950656	1.22877	1.03094	2.23287	2.4977	1.50635	0.424447	0.558274	0.1372	1.52558	1.79718	0.747252	1.50413	1.0158	2.80206	3.79545	0.514682	2.22692	0.416934	1.12551	1.49855	1.25317	1.14195	0.620482
240	0.683428	1.22715	0.51401	1.18959	0.93828	0.999056	0.850963	0.78131	0.281339	-0.0808745	0.52064	0.347081	0.721982	0.777038	0.872756	0.746691	1.56954	1.31315	2.09518	0.895459	2.14537	0.415581	1.03659	0.324581	0.348581	2.76265	1.22332	1.95264	1.75239	1.11397	2.8255	1.52753	1.69609	1.26836	0.780957	1.40471	-0.181001	0.590395	0.305621
241	0.978985	0.868853	1.11446	1.69104	0.656011	0.546347	0.875575	0.961221	0.175692	0.114755	0.454691	0.964896	0.683848	0.903262	0.86135	1.13165	1.35315	1.22886	2.22839	0.502722	0.734358	-0.209641	1.1868	0.27869	0.190855	1.93078	1.06891	1.48106	2.09458	1.87579	1.98483	1.32413	2.25653	1.27112	0.819756	2.1316	1.53853	0.112301	0.0284602
242	0.721407	0.671191	0.54339	2.26235	0.538205	1.50415	0.687704	0.849726	0.608216	0.512832	0.326404	0.436491	0.154188	0.536912	0.936455	1.07387	1.6561	1.09215	2.21484	-0.0920782	0.643594	0.529396	0.66393	0.881882	-0.0760664	2.42378	1.03016	1.33033	3.07024	2.36207	2.1918	1.72737	2.70594	0.778526	0.803232	1.28716	0.747559	1.9092	0.895572
243	1.53679	0.805028	-0.041256	1.67559	0.666156	1.16921	0.453799	0.773462	0.476972	0.00523074	0.903339	0.628901	0.429162	-0.280728	0.941908	0.993562	1.26323	0.187288	0.668155	0.755177	1.86492	-0.037246	0.949763	0.62143	0.629798	2.24417	1.02547	1.44996	3.22894	0.374495	2.43688	1.6113	1.34737	0.810362	0.328431	2.01769	1.4641	0.399219	0.0170387
244	1.18076	0.544184	0.311011	1.84243	0.505867	-1.45469	0.383884	0.684317	0.323003	0.0420027	0.242507	0.467957	0.431297	0.739342	0.615637	0.56049	1.60592	0.93815	1.45192	0.249214	2.76421	0.619283	1.12899	0.684814	0.575519	0.821294	1.04593	2.11627	0.892306	2.40687	2.34725	2.65336	1.76219	1.36013	1.19505	0.927308	0.838023	-0.0643354	1.11962
245	0.838971	0.92561	0.269247	1.81831	0.701262	0.918957	0.58301	0.724681	0.347743	0.241608	0.564472	0.90982	0.397174	0.944861	1.26335	0.64971	1.548	0.763567	2.11531	0.926471	1.02591	-0.668884	0.924167	1.1044	0.117974	0.965625	0.827296	0.998098	2.0641	1.96677	2.65561	1.03715	0.618289	1.7888	1.38346	1.66654	0.590385	-0.220475	0.816401
246	0.646628	1.26753	0.662569	1.98302	0.19891	1.22619	0.770137	0.727912	0.283819	0.297691	0.450803	0.63717	0.582849	0.115696	0.616885	0.655254	1.12369	0.909076	1.62178	0.503616	0.778465	0.326809	0.812519	0.701189	0.141543	1.46061	0.622722	1.36626	1.86769	0.555334	2.44355	1.66157	1.91752	2.07405	0.806329	0.945702	0.609522	0.956211	0.257141
247	0.323355	0.396802	0.965028	1.47457	0.799855	1.16311	0.521389	0.949286	0.302081	0.543606	0.637478	0.679747	0.347383	0.853179	0.611337	0.778589	1.48582	0.775065	2.05644	1.0167	1.83219	0.392339	1.18131	0.552282	0.418789	1.05971	0.580095	0.946635	2.94341	1.49855	1.64677	2.48445	1.99075	0.894173	1.68017	1.42678	1.08669	0.639326	0.785367
248	0.825233	1.07932	0.596797	1.51581	0.696066	0.828044	0.553242	0.830691	0.636863	0.56363	0.601025	0.56244	0.09264	0.703166	0.960383	0.72917	1.6625	1.04853	1.84148	1.8176	1.45443	0.367313	0.535652	0.963245	1.46214	1.99577	0.815555	1.68781	1.38435	2.24426	2.79993	1.37603	1.07556	1.66619	2.10533	2.02558	0.785014	0.738405	-0.44649
249	0.938101	0.471374	0.466336	1.74526	0.968844	0.961465	0.554342	0.647326	0.409772	0.418175	0.486146	0.550226	0.690649	0.243798	0.872668	0.779919	1.30481	1.04472	2.67815	-0.427787	1.18097	0.244046	1.49052	0.784126	0.976946	1.68934	0.85978	1.09353	2.25091	2.05048	1.76337	2.57603	1.71761	0.264695	0.907267	1.67176	0.245051	0.0603114	-0.123255
250	0.832746	0.689301	0.628255	1.63781	0.573983	1.15833	0.574328	0.429194	0.404887	0.386198	0.44694	0.607907	0.281883	0.715417	0.679122	0.826253	1.40378	1.42021	1.68859	-0.134276	1.58206	-0.0761569	0.379741	0.322898	1.11554	1.60696	1.43572	2.60343	1.95508	2.90616	1.79522	0.866146	1.24151	1.86145	0.77815	2.51616	0.771579	-0.0525687	0.430735
251	0.898113	-0.073242	0.605171	1.62871	0.86047	1.54207	0.577343	0.977759	0.217476	0.829598	0.586693	0.446525	0.38836	0.806472	0.934977	0.532787	1.13373	0.847283	2.13249	1.26693	1.91913	0.626311	0.601885	0.586541	0.204697	1.116	2.10841	1.82476	2.00167	2.40649	2.76385	2.12557	1.8721	1.40427	0.778127	0.81774	0.697748	0.460534	0.178871
252	0.79647	0.685544	0.746965	1.83026	0.762703	1.22864	0.63842	0.690633	0.232491	0.355962	0.430735	0.551175	-0.0549572	0.488825	0.910855	0.746651	0.901302	0.972286	1.38306	1.33188	1.73903	-0.162525	0.775058	0.749303	1.04585	1.16463	0.602161	1.91845	2.7857	1.99558	1.18095	1.38158	2.40525	0.981057	0.817086	0.492609	1.54987	-0.210069	-0.446113
253	0.925653	0.736285	0.352864	1.81767	0.601682	0.561334	0.894384	0.812305	0.429522	0.0655579	0.60141	0.504343	0.341536	0.728054	0.820227	0.730219	1.14013	0.774997	0.620301	1.53029	1.09747	0.32185	0.576127	0.280184	1.6025	1.66297	1.00611	1.98889	0.378328	2.73231	2.02635	2.44455	1.64463	1.60289	0.824254	2.06517	0.452949	0.374668	-2.8537e-05
254	0.770459	0.643065	0.537271	1.72131	0.23374	1.23528	0.732165	0.75499	0.438269	-0.204923	0.376609	0.427124	0.536236	0.340887	1.28006	0.732316	1.34714	0.680636	1.25935	-0.116933	2.09372	-0.349763	0.817948	0.614762	0.713069	1.62166	1.29258	1.30602	2.2658	2.43722	3.15843	1.44655	0.829118	1.9878	-0.107235	0.640062	-0.256738	-0.469395	1.31029
255	0.293806	0.977265	0.584622	1.82528	0.824642	1.07905	0.519168	0.5347	0.575059	0.433571	0.322639	0.92166	0.283149	0.114401	0.888823	0.529662	1.38014	1.41524	1.21305	1.73429	3.33859	-0.239908	0.877733	0.320241	0.354991	1.4525	0.650672	2.16453	1.75937	1.02744	2.91616	2.02175	1.1008	1.44771	1.58468	0.822689	0.575428	0.630551	-0.95154
256	0.547366	1.06092	0.566682	1.669	0.747271	0.249088	0.660117	0.70137	0.271089	0.411132	0.33348	0.584957	-0.361594	1.07166	0.753404	1.17216	0.975499	0.81232	0.776113	1.12164	0.506811	0.658209	1.22443	-0.354383	-0.208145	1.07693	0.362544	2.03768	2.66017	1.93507	1.8197	1.70813	2.52203	0.310155	1.05764	0.452151	0.757232	0.177001	0.36581
257	0.460181	0.80101	0.81427	1.78216	0.813082	0.461103	0.56869	0.951325	0.246094	0.0601475	0.72007	0.776591	0.495359	0.562654	0.361093	1.1746	0.965499	1.3004	1.78178	0.39229	0.955921	-0.253174	1.19539	0.705837	-0.794302	0.490812	0.812399	0.97323	1.79066	2.68298	3.15263	2.60234	0.858531	0.183921	0.293915	0.918601	0.412119	0.520068	0.0866354
258	0.840783	0.808309	-0.367007	2.1295	0.550884	0.81848	0.376323	0.877697	0.148142	0.0201479	0.482134	0.626429	0.291638	0.248639	0.685584	0.666989	1.37181	0.719446	0.380145	0.774702	2.10655	0.125537	0.510363	1.72944	0.808019	1.64545	0.961299	1.43478	1.78875	1.0631	2.11385	0.873914	1.55828	1.15552	0.203279	1.59314	0.587052	0.264454	-0.846337
259	0.398921	-0.797808	0.496748	1.65172	0.757087	0.697035	0.655093	0.681824	0.494377	0.494155	0.144858	0.413705	0.759631	0.508074	0.797873	1.02249	0.925623	1.09611	1.24193	0.706337	1.36177	0.171596	1.04696	0.511714	0.427099	1.51278	0.728409	1.09743	1.61972	1.5425	-0.136715	1.7372	2.60745	0.996723	0.129189	1.48429	0.864042	0.808698	-0.444751
260	0.602031	0.242006	0.244853	1.56162	0.726204	0.800708	0.491052	0.792576	0.318855	-0.336674	0.155068	0.451323	0.426044	0.999819	0.767619	1.17605	1.27551	1.08723	2.54864	0.456088	1.13317	-0.490101	0.519942	0.0374313	0.790364	0.773119	0.738458	1.45109	1.33589	1.05781	2.33185	1.59923	0.393016	0.821144	1.2602	-0.14956	1.32538	0.731576	-0.617263
261	0.690831	0.625759	-0.285468	1.05125	0.379979	0.214616	0.591368	0.787869	0.607088	0.100951	0.406902	0.742423	-0.238229	0.309065	0.783726	0.883857	1.02881	0.952737	2.00205	1.01013	1.91765	0.310623	-0.105527	-0.270407	0.938234	1.704	0.872412	1.19368	1.5051	1.56656	2.61854	1.53904	1.81209	-0.671189	0.846697	0.916086	1.12242	0.662338	0.404445
262	1.02341	0.58625	0.0479859	1.82625	0.517392	0.885667	0.623028	0.825148	0.34158	0.0900684	0.388175	0.736051	-0.0603458	0.00100938	1.0729	0.829076	0.553962	0.916249	0.863066	2.60711	2.04087	0.776514	0.622345	0.655498	1.22161	0.67285	0.0997203	0.983511	0.859174	2.07505	2.15244	1.35851	0.526264	-0.169432	0.615934	1.72324	0.87292	-0.119467	1.48754
263	0.825342	0.607282	0.513668	1.80756	0.520016	1.16015	0.370067	0.973812	0.599107	0.733321	0.58813	0.572812	0.660191	0.640129	0.811047	0.990719	1.4121	1.05223	0.900049	0.996514	-0.0639182	0.530302	1.17399	0.124538	0.623176	1.03829	0.906307	2.15049	2.25241	0.7998	2.04472	1.93185	1.21396	0.720994	0.143881	1.53308	1.03376	0.228103	0.215633
264	0.663903	0.451235	0.370379	1.47686	0.414343	0.995246	0.780579	0.916243	0.47819	0.513227	0.0944594	0.988471	0.539808	0.364318	0.727764	0.742598	0.989902	0.967104	1.67985	-0.061551	1.3906	0.00116664	0.335961	0.470326	1.8773	1.14551	0.614301	1.39404	1.19599	1.37123	2.32079	1.53853	1.11233	0.78679	-0.121713	1.77395	1.20813	0.781402	0.137286
265	1.01209	0.264089	0.563281	1.24546	0.314675	1.07246	0.57192	0.627244	0.544443	-0.268271	0.599278	0.770772	0.154131	0.387263	0.874652	1.00991	0.957351	0.980173	0.527996	1.53565	2.15266	-0.673105	0.0957761	0.772187	1.59956	0.337173	0.889777	1.55712	2.62376	2.55214	2.69562	1.3545	1.45996	0.928465	-0.349171	1.627	-0.04378	0.204025	0.485194
266	0.80027	0.590927	0.829239	1.56165	0.638215	1.40933	0.456968	0.766801	0.532945	0.301456	-0.166654	0.757014	0.251039	0.304581	0.697057	0.77135	1.09492	0.768725	1.14159	2.1425	0.645668	0.814139	0.0595706	0.40852	0.483334	0.305634	0.419761	-0.172067	2.2943	1.61465	1.22908	0.724399	1.24019	0.933303	0.572279	0.902996	1.23752	0.609696	1.35921
267	0.582943	0.662591	-0.111203	1.14637	0.630607	0.935781	0.669591	0.451543	0.430845	0.0842778	0.666953	0.520759	0.0200929	0.865413	0.666707	0.997715	1.09694	1.00309	1.90945	0.675881	0.344826	0.0157055	1.12409	0.64746	0.531895	1.78617	0.276276	1.31365	1.08103	1.49452	0.59974	1.97444	2.03678	0.43202	0.054533	1.14919	0.91905	0.933802	-0.473588
268	0.783629	0.112622	0.977817	1.78763	0.461679	0.131468	0.538802	0.521971	0.241705	0.21285	0.144742	0.501919	0.37326	0.373875	0.48093	0.719754	1.26562	0.897016	1.78182	0.515363	1.46549	-0.791207	0.327293	0.463283	1.15243	1.44532	0.747509	1.32767	1.5542	0.879956	2.80074	0.980017	1.45134	1.19876	0.223959	1.46117	0.405055	0.723885	0.739979
269	0.411763	0.619471	0.695604	1.62933	0.364148	0.845401	0.790903	0.678425	0.389602	-0.865761	0.380356	0.646833	0.401207	0.580002	0.770699	1.1226	1.26298	0.777248	0.730366	0.561496	2.56938	0.391338	0.766252	0.584983	0.569279	1.5811	0.522304	-0.277271	1.82479	1.62893	2.43854	1.39384	0.845377	0.723265	1.37032	1.47394	-0.244854	0.212124	0.407268
270	0.468109	0.583949	0.579858	1.78926	-0.0261159	0.764392	0.526235	0.984372	0.453781	0.387277	0.452256	0.618144	0.210709	0.4224	0.0805156	0.845004	0.946404	0.617347	1.92793	1.01258	0.539794	0.57087	0.121345	-0.130094	-0.331702	0.617294	0.562603	1.03103	1.57253	0.838284	2.99894	1.19543	1.99059	0.57489	1.11454	1.45953	0.428239	0.251011	0.501061
271	0.248074	0.676566	0.482274	1.75331	0.189837	0.711318	0.719874	0.8817	0.29141	0.115683	0.387479	0.606724	0.317558	0.636597	0.606759	0.873312	1.65314	1.04962	1.97796	0.572719	0.644652	-0.170944	0.881892	0.330238	0.969291	1.42255	1.66866	0.586324	1.20982	1.19335	2.21773	1.89816	1.3769	0.737394	0.425901	1.19557	0.980082	0.365188	0.795647
272	1.01028	0.366155	-0.0678804	1.33758	0.381677	0.550467	0.951692	0.750942	0.543466	0.594228	0.389888	0.8045	0.234126	0.165368	0.53872	0.878978	1.05622	0.749911	1.24276	0.743177	1.28355	0.56507	0.690932	0.716107	0.681383	1.70907	0.388953	2.3403	1.90169	0.972475	2.23107	1.7069	0.761521	0.794729	0.417011	1.98502	-0.0576469	-0.332828	-0.0167478
273	0.624766	-0.0160624	0.797211	1.67339	0.298473	1.25586	0.506503	0.782738	0.394998	0.372233	0.388747	0.455395	-0.203652	0.791365	0.448164	0.0180777	0.894327	1.09973	0.836163	1.46609	3.04543	0.737605	0.668881	0.252332	0.101981	1.9085	-0.513139	1.77201	2.38564	1.03494	1.62739	1.55399	1.75884	0.52082	0.740492	1.83348	0.220534	0.701373	-0.0463977
274	0.872669	0.579529	0.489685	1.97448	0.31623	0.869802	0.690433	0.588618	0.809906	0.0188803	0.13601	0.928723	0.614326	0.645562	0.815371	0.468993	0.988194	0.933437	1.49932	-1.23096	2.28482	0.310174	0.224617	0.150273	0.88291	1.31431	1.10293	1.06498	1.52018	1.59795	2.36912	1.24489	2.30152	-0.499886	0.424966	0.684244	0.28584	0.692237	-0.0176187
275	0.715226	0.28738	0.365647	1.62068	0.391562	-0.580046	0.694202	0.3958	0.497278	0.195555	0.0808926	0.276585	0.331221	0.553953	0.2077	0.559946	0.667006	1.25722	0.423857	0.948973	2.21408	-0.3155	0.705354	-0.0690857	0.851531	1.39908	1.14121	-0.514344	0.943312	0.678515	1.76674	2.9728	1.39231	0.17055	0.306788	1.44717	0.819122	-0.132445	-0.443093
276	0.68749	0.919116	0.635571	1.94621	0.786215	1.13371	0.609551	0.635149	-0.0100657	0.233221	-0.611858	0.855664	0.438552	0.611141	0.738772	0.629366	0.877969	0.645431	2.30655	0.826242	0.0112324	0.509084	0.391475	1.00128	0.551993	1.21375	1.07413	2.12685	0.98664	1.45462	2.32133	1.09075	1.28632	1.49354	1.27074	0.654953	0.993801	-0.475132	0.73938
277	0.229488	0.530971	0.825514	1.55415	0.35337	0.982371	0.685674	0.705308	0.290914	-0.0239667	0.308465	0.5098	0.582938	0.595791	0.809505	0.167805	1.02807	0.952118	0.757309	1.16372	2.04233	0.36781	0.860468	0.450457	0.904134	0.702671	1.05174	1.08816	0.300236	0.611443	3.03255	1.38424	1.47958	0.820909	0.600782	1.98374	-0.806281	-0.478534	0.446221
278	1.02548	0.221418	0.232538	1.90887	0.548111	0.874769	0.313656	0.499683	0.743532	0.0630289	0.231156	0.601395	0.0376924	0.720165	0.488139	0.764072	0.590484	0.704685	2.67129	0.367106	1.08672	0.989803	0.783981	0.131818	0.773641	1.18972	0.188229	0.954288	0.907444	1.79496	0.980068	1.03783	1.28906	1.18351	0.324393	0.505163	0.554707	-0.106311	-0.239672
279	0.801974	0.2019	0.734575	1.47474	0.282629	1.05799	0.714397	0.448914	0.341971	0.528293	0.427935	0.41154	0.683984	0.216976	0.814155	0.84946	0.909142	1.1674	0.309663	0.883212	1.68319	0.301508	0.309783	0.264978	1.06738	0.70732	0.463495	1.99065	1.80259	1.00129	2.37338	2.15778	2.79823	0.569835	1.88567	0.233848	-0.00300063	0.00823674	1.22956
280	0.52688	0.617796	0.490008	1.79692	0.289532	0.870605	0.261574	0.627253	0.58301	0.0128485	0.428585	0.122701	0.00202491	0.288873	0.70605	0.78863	1.18671	0.689037	1.40553	0.244332	1.02073	-0.77667	0.840689	0.667173	1.2161	2.21621	0.874448	1.44397	0.775471	2.12374	1.22501	1.97186	2.23828	1.47801	-0.14292	0.726459	0.299456	0.518752	0.16516
281	0.320189	0.735174	0.389459	1.31271	0.344488	0.967903	0.591229	0.590849	0.24169	0.296707	0.525309	0.590569	0.218551	0.791147	0.837955	0.461069	0.70254	0.687068	0.698573	0.133315	-0.036636	0.19661	0.522271	0.8074	0.201385	0.804604	1.77914	1.32289	2.66581	1.71345	1.60015	-0.128555	0.509434	0.863462	0.508991	1.48394	0.187128	0.132499	-0.173727
282	0.822569	0.322987	0.84296	1.49149	0.217121	0.786824	0.799904	0.587369	0.152441	0.386111	0.426788	0.461592	0.205299	0.638182	0.285583	0.109475	0.47919	0.386244	0.235997	0.343357	0.797084	0.423527	0.831183	0.370872	0.946423	-0.029191	0.944344	1.37869	2.13893	1.79559	2.2679	1.31836	1.54433	0.179274	1.62652	0.372216	0.28692	-0.409168	0.307953
283	0.384594	0.644872	0.749778	1.52174	0.341904	0.806818	0.862697	0.332103	0.562855	0.659459	0.515533	0.955857	0.262499	0.395046	0.391248	0.685518	1.04498	0.737126	1.07916	-0.339	0.379483	-0.33991	-0.181911	0.63029	0.845418	0.933357	0.845597	1.49697	1.81104	1.0563	2.54119	1.26875	1.22617	1.5861	0.43596	1.36683	0.61664	0.875598	1.59942
284	0.794876	-0.00760697	0.65206	1.1339	0.598737	0.61608	0.525475	0.42876	0.58038	0.114443	0.331396	0.707093	0.417802	0.272326	0.371422	0.945071	1.20142	0.852432	1.79109	0.277532	1.83302	-0.334445	0.369813	-0.243864	0.925684	1.80536	0.575341	1.38759	1.20837	1.3982	2.14307	1.24731	1.36235	-0.0149135	1.21281	0.672484	-0.455958	1.24262	-1.00651
285	0.498925	0.386424	0.693659	1.45153	0.47615	-0.191303	0.765238	0.551526	0.286194	0.452189	0.380809	0.443219	0.290969	0.162675	0.0810839	0.674913	1.49261	0.818332	1.66603	0.0870526	0.200835	0.278756	0.895995	0.29878	0.383588	0.748296	0.658121	1.03173	2.06477	1.64168	2.03923	1.74953	1.40767	1.62255	0.450692	1.28338	0.596721	-0.112421	-1.3806
286	0.609413	0.0939496	0.0134053	2.02422	0.3433	0.467409	0.489762	0.584416	-0.118508	0.403907	0.627287	0.594376	0.31808	0.0284956	0.067449	0.883837	0.827065	0.707528	1.33236	0.937541	0.85822	0.299151	0.100513	0.911491	0.39337	0.133883	0.391288	1.51904	2.40383	1.87432	1.88004	0.495693	1.19401	1.58383	1.17701	-0.0870645	0.628446	0.722038	-1.15003
287	0.464724	0.615932	0.64819	1.35819	0.63042	1.27323	0.672536	0.25653	0.57793	0.000924091	0.339571	0.346485	0.465252	0.841759	0.639215	0.672352	1.3006	0.996662	1.39389	0.677339	2.48667	0.38927	0.24464	-0.693716	0.424887	0.895747	1.22413	0.822356	1.53523	2.33124	2.55416	1.37307	1.32107	1.11047	1.10685	0.147467	0.899249	-0.0915723	0.88654
288	0.524238	-0.0735929	0.386938	1.466	0.0564503	0.648855	0.83409	0.552097	0.291214	-0.43803	0.215704	0.564437	0.619389	0.479637	0.37226	0.895451	1.53335	0.60971	1.40493	0.352743	0.320236	0.601566	0.729071	0.7512	1.36312	0.801808	0.180861	1.42992	1.70997	0.677726	1.77026	1.67759	0.753957	0.69179	0.190229	0.797937	0.845	0.298214	0.244054
289	0.960116	0.180863	0.216721	1.34249	0.29847	0.232749	0.535287	0.620548	0.414552	0.0319147	-0.00982147	0.421885	-0.0317725	0.631868	0.431914	0.72044	0.916693	0.69986	1.12531	1.01779	0.994055	-0.311342	0.0222127	-0.17384	0.522126	1.36013	-0.122817	1.67313	2.59217	-0.126622	2.61362	2.38112	1.22905	0.780614	0.775865	0.94363	0.559934	1.16757	-0.145961
290	0.587791	0.0360451	0.220731	0.976458	0.421447	0.748951	0.228238	0.972331	0.496106	0.00289347	-0.0447026	0.577426	0.19356	0.825465	0.773461	0.0804405	0.900767	0.922219	1.2818	0.618973	1.79724	-0.319968	0.536515	0.580315	0.162541	1.08438	0.608307	1.02896	1.40582	1.07248	2.26249	1.96591	0.195499	0.648494	1.1431	0.809105	1.64595	-0.211872	-0.284466
291	0.48497	0.53914	0.767629	1.44885	0.333069	0.433156	0.383192	0.871501	0.390398	0.19183	0.627877	0.778134	0.545601	0.487803	0.632304	0.382616	0.69075	0.977473	1.75172	1.18095	1.63502	0.124922	1.04387	0.0789883	0.201521	0.491996	0.223635	0.264057	1.00488	2.23662	1.01814	0.311698	1.62824	0.198872	1.07829	0.921382	0.471507	-0.766001	0.289704
292	0.348056	0.562484	-0.0584798	1.32745	0.53525	0.0995141	0.519893	0.478546	-0.305634	-0.0156409	0.448565	0.232938	0.329522	0.0659267	0.401441	0.639709	1.07472	1.22107	1.79604	0.168795	0.988126	0.325484	0.184617	0.00102201	1.23582	0.708492	0.72617	1.14309	-1.15066	0.718573	1.18863	1.86213	0.539266	-0.552243	1.07477	0.661594	1.17019	0.826648	0.561522
293	0.409186	0.653287	0.0654947	1.21453	0.146081	-1.01522	0.649743	0.619871	0.270578	0.19856	0.440096	0.354738	0.396166	-0.290936	0.23059	0.878756	1.17615	1.07535	1.1627	-0.775002	1.34646	0.311204	0.396174	0.370809	-0.0531342	1.50249	0.909112	1.68692	1.97147	1.18021	1.62334	1.13924	-0.359005	1.29094	0.0264916	0.635253	0.685241	0.137801	0.361507
294	0.727762	0.0851642	0.433801	1.32311	0.547951	0.321828	0.40696	0.430064	0.203438	-0.0864147	0.591743	0.378359	0.305215	0.683419	0.292577	0.68451	0.729412	1.06494	0.941198	0.0288555	0.797993	0.435269	0.60492	0.383316	-0.0925214	0.919763	0.305376	0.705135	1.11119	1.11906	1.38392	1.19174	1.08051	0.897271	1.7211	-0.462346	-0.768635	-1.23975	-0.162084
295	0.492941	0.177805	-0.109309	1.33221	0.534243	0.59618	0.522048	0.495729	0.295528	-0.191088	0.383938	0.403124	0.121035	0.433221	0.0967773	1.21001	1.15062	0.750837	0.2488	0.349091	1.36885	-0.389555	0.637684	0.765007	0.272565	1.12078	0.653021	0.87256	1.45355	0.858961	2.49278	1.06068	1.34337	2.18988	1.21184	1.5042	1.4533	0.0931324	-0.558464
296	0.576325	0.414708	0.522106	1.16067	0.448902	0.379436	0.567736	0.846254	0.179089	-0.208191	0.741197	0.439897	0.15653	0.325815	0.406286	0.51329	1.10591	1.21987	2.1253	1.44446	1.39878	0.331877	0.82144	0.541252	0.629015	2.06877	-0.320421	2.36706	2.39949	1.1358	1.4079	0.584903	1.58767	-0.109223	0.296285	0.562539	0.238401	0.418624	-0.285582
297	0.128435	0.661625	0.207732	1.39713	0.220447	0.70698	0.697056	0.512168	0.0542935	0.0424448	0.155702	0.1697	0.438255	0.368019	0.254566	0.952289	1.16714	0.967331	0.878646	-0.221521	2.03317	0.143303	0.609832	0.48099	-0.0912421	1.21771	0.616086	-0.833635	2.62288	0.401448	2.2436	1.78499	1.40043	0.258278	0.151387	0.371152	-0.27427	-0.0790665	0.155763
298	0.625683	0.572785	-0.230889	1.48723	0.131415	0.407377	0.637381	0.27242	0.362938	0.165508	0.434314	0.501445	0.177759	0.275904	0.404426	0.793831	1.28333	0.879442	0.579315	-0.0540955	0.451524	0.247985	-0.40096	0.37578	1.0093	0.809472	1.42233	2.05946	1.10588	1.16167	1.84743	1.30129	-0.676406	0.441629	0.199043	0.0959558	1.29421	0.129393	-0.539998
299	0.54053	-0.198302	0.128803	1.92208	0.382844	0.359805	0.672427	0.462503	0.0127501	-0.0265884	0.330405	0.274938	0.298746	0.528587	0.175431	0.824479	1.02632	0.948981	0.940817	-0.792246	1.19782	1.03955	0.410795	0.88554	1.3687	1.17774	0.23983	0.969604	1.32269	1.00021	2.14207	0.559115	0.695085	1.35176	0.663637	0.365936	0.835072	-0.630033	-0.491695
300	0.412505	0.055069	0.53893	1.22484	0.0788859	0.224208	0.577527	0.552284	0.278799	-0.200842	0.360026	0.432835	0.524958	0.389579	0.201636	0.345578	1.3236	1.16487	1.33066	0.590361	1.89479	-0.0373449	0.551488	0.691327	1.56351	0.690395	0.0475082	0.934831	0.845051	1.14822	2.19239	1.72763	0.552894	1.82981	-0.350804	-0.271706	0.666705	0.780095	0.131067
301	0.564182	0.587597	0.804224	1.10808	0.45727	0.79287	0.362638	0.12612	0.0508215	0.179176	0.622289	0.451124	0.369294	-0.0405482	0.228683	1.02879	1.11885	1.11906	1.68059	0.516875	1.69432	1.01053	0.779898	-0.261221	0.263677	1.36718	0.761736	-0.457403	1.40757	1.82891	2.23136	1.66888	1.28459	0.590374	-0.204632	0.83548	-0.311183	-0.545974	-0.0836826
302	0.48521	0.411464	0.164695	0.743031	-0.0598959	1.3575	0.751619	0.612477	0.220362	0.0527925	0.600113	-0.154404	0.289596	0.480103	0.304599	0.889765	1.09241	0.298257	0.93246	-0.0400305	1.0803	-0.316632	0.894687	-0.046568	0.0309423	1.72379	1.19966	1.60393	1.34735	2.7485	1.88697	1.87582	0.788668	2.06995	0.429921	0.724554	-0.188584	-0.0581763	0.166577
303	0.418096	0.735271	0.327456	1.33222	0.306665	0.821456	0.37864	0.291347	0.201995	0.129035	0.40023	0.609026	-0.00852694	0.282706	0.600011	1.0386	1.65602	0.883502	1.76481	0.751396	0.813824	0.109027	0.383513	0.475638	0.607885	1.50262	0.460941	0.201139	2.05177	1.23381	2.55389	2.38811	1.53896	1.07813	0.698262	1.46452	0.750064	-0.129679	-0.523184
304	0.601223	-0.393815	0.0920621	1.29254	0.11133	0.855436	0.498891	0.22804	0.29174	0.146213	0.467501	0.635661	0.361846	0.329425	0.439592	0.568132	0.61536	0.487103	0.838234	-0.766742	0.913581	0.564882	0.312215	0.0125682	0.135322	0.236125	0.149393	0.838408	2.35091	0.00888778	1.6588	1.91829	0.928818	0.0870518	0.46901	1.133	0.208478	-0.733922	-0.125141
305	0.683646	0.719811	-0.241936	1.32913	0.493751	0.185904	0.493753	0.770839	0.355904	0.447527	0.553909	0.384451	-0.0549251	0.364137	0.370746	0.512907	0.715359	0.512677	-0.365323	0.538237	-0.266903	0.660584	0.439504	-0.234206	0.570169	1.12555	0.760542	0.385828	1.83516	0.313594	1.73365	1.83943	1.28662	1.16711	-0.309927	1.59498	0.680319	0.476863	-0.195965
306	0.117341	0.198772	0.0276455	1.09785	0.233328	0.965708	0.617159	0.800434	0.380328	-0.316998	0.876036	0.0949405	0.231091	0.0785069	0.573278	0.373745	1.51205	0.647902	1.15901	0.52813	1.71178	0.482032	0.592984	0.16252	0.146051	1.27001	0.649504	1.61322	1.49952	1.02519	1.93685	0.856851	-0.0926732	0.677274	-0.0735802	0.759971	0.929521	-0.142539	0.519187
307	0.214528	0.35054	0.358058	0.933107	-0.0112446	1.00319	0.678348	0.718134	-0.0399908	-0.129354	0.355038	0.747521	-0.242119	0.58061	0.470359	0.813248	0.812559	0.731181	0.613778	0.110404	1.48744	-0.0186348	0.385219	0.475548	0.405155	0.336191	-0.633182	1.26578	2.01906	0.634041	0.968247	1.35685	1.5353	0.492697	-0.156374	0.334279	0.0870083	0.332594	0.698489
308	0.412462	0.265776	0.0903454	1.27042	0.238886	1.08905	0.497123	0.147494	0.310859	0.25681	0.158727	0.53923	0.297091	0.548401	0.0606137	0.321343	0.978359	0.789033	1.16458	1.25367	0.917475	0.27335	0.909333	0.861122	0.404867	0.863685	0.682921	0.568311	0.837367	0.55728	0.601297	0.546477	0.345694	1.29252	1.57006	0.707885	0.0920356	0.781606	0.44791
309	0.890905	-0.191775	0.525311	0.905405	0.184529	0.742365	0.429176	0.561082	0.09988	0.244332	0.361967	0.272528	0.35143	0.628521	0.393112	0.693926	0.989614	1.05923	0.451525	0.502882	2.40014	-0.0157389	0.406844	-0.330316	0.891027	1.66354	-0.53432	0.239337	0.611171	1.77661	0.790351	0.754774	0.0351815	0.404586	0.575308	0.171631	1.39919	0.533584	0.132233
310	0.2897	0.35494	0.392772	1.46536	-0.0975885	0.879581	0.481439	0.590857	0.336816	-0.0248973	0.206338	0.397266	0.16843	0.338511	-0.126527	0.511576	0.778938	0.91546	0.889378	1.28992	1.31017	0.67898	0.580151	0.728108	-0.160696	0.465601	0.889421	1.28267	1.15391	0.346247	1.57723	1.26182	0.00730911	0.238046	-1.01553	1.3473	0.629158	0.112678	0.0466332
311	0.391364	0.554762	0.28763	1.43662	0.196716	-0.155217	0.745791	0.675845	0.382538	0.0318188	0.170991	0.108705	0.154936	0.0781897	0.561121	0.533795	0.711367	0.771876	1.00166	0.619339	1.20105	0.414569	-0.0212802	-0.184595	0.996809	0.0117455	-0.795702	0.785151	1.94214	0.717851	1.84031	1.15135	1.44849	1.13998	-0.893564	0.234976	0.435209	0.154336	0.832219
312	0.383	-0.0536539	0.279015	1.16714	-0.153322	-0.574755	0.594953	0.489004	0.422864	0.0148457	0.211904	0.606888	0.182776	0.576813	0.367456	0.406166	0.9098	0.802917	1.54265	0.480892	1.21755	0.27436	0.180392	0.206211	-0.0976576	0.658875	0.150037	0.598758	2.34906	0.550126	1.50054	1.99031	0.509822	1.42405	0.818904	0.386189	0.502524	1.02336	0.502218
313	0.464484	0.438162	0.765209	1.07912	0.311085	0.953527	0.505207	0.707981	0.229605	-0.459894	0.36493	0.525171	0.032572	0.338216	0.0466887	0.367515	1.11603	0.657574	1.96671	0.0355887	1.50146	-0.122186	0.687351	0.984892	0.0861262	0.794592	0.615163	0.706933	0.175205	1.75524	1.87626	2.04534	1.11555	0.907176	0.951447	0.260515	0.871442	0.174084	1.38311
314	0.331523	0.0504799	0.318264	0.855086	0.0161337	0.573523	0.513486	0.270673	0.0981365	0.333368	0.246632	0.530374	0.0967055	0.303344	0.405022	0.0999175	0.892043	0.494049	0.719536	0.967203	0.700585	0.669938	0.492958	0.171697	0.356092	1.0024	-1.00153	0.938133	1.46651	1.06784	1.70276	0.576023	0.983256	1.55114	1.12177	2.25583	1.11978	0.557143	-0.720185
315	0.601878	0.5583	0.735797	1.26122	0.214917	1.09186	0.281299	0.681399	0.262176	-0.20633	0.277316	0.537911	0.558084	0.0733158	0.379044	0.912407	1.08087	0.737145	2.00257	0.915962	1.63383	0.397692	0.635063	0.392057	0.0568867	1.37374	0.777108	0.817506	2.2631	1.63309	1.67002	0.486383	0.637154	0.888684	1.00256	0.978951	1.35404	-0.0538438	2.04587
316	0.702516	0.147858	0.222891	0.894086	0.279655	0.74981	0.467753	0.258006	0.120261	0.376357	0.449093	0.536665	0.18377	0.495466	0.387512	0.694954	0.94947	0.812612	1.29035	-1.13542	-0.28265	0.118365	0.672233	-0.31617	0.399208	0.740681	0.186852	0.390351	0.848121	1.00835	1.68339	1.04967	0.863057	-0.0533264	0.869759	0.00168105	0.658997	-0.840637	-0.028774
317	0.363737	0.21522	0.159481	1.09986	0.464546	0.737412	0.46011	0.315058	0.278799	0.261642	0.50162	0.24107	0.460006	0.269055	0.185382	0.630414	0.62141	0.831462	1.30379	0.738856	1.88039	0.569687	0.679695	-0.325577	0.868013	0.518358	0.359694	1.69463	1.87969	0.818921	1.33761	1.60348	1.27535	0.690569	0.324625	0.9429	0.572912	0.212199	0.295864
318	0.405429	0.502395	0.0740275	1.29971	-0.14357	0.28691	0.510117	0.80886	0.210502	0.233483	0.554459	0.222302	0.325539	0.0157314	0.415966	0.819337	0.352875	0.916962	0.578446	1.30646	2.13972	0.451343	0.832283	-0.199109	0.566351	0.590501	-0.286503	2.54304	0.303703	0.310266	1.72377	1.02277	1.57046	0.676208	0.358806	0.44535	0.0235645	0.383857	0.617304
319	0.139705	-0.264267	0.955481	1.54597	0.411044	0.535347	0.214999	0.745403	-0.0863288	0.257589	0.152683	-0.070168	0.173222	-0.198438	0.561229	-0.0384177	0.831324	0.56191	2.22532	-0.0607556	1.05196	0.845458	0.333839	0.0512405	0.253135	-0.423186	0.797666	1.21505	1.75572	1.07449	1.39566	0.816401	0.970503	1.2973	0.502381	0.109417	1.06089	0.677625	0.163662
320	0.680108	0.363093	-0.188859	1.0463	0.328986	-0.690593	0.413329	0.724068	0.0358214	0.17196	0.239309	0.161255	0.219802	0.469471	-0.00133726	0.443608	0.428985	0.681719	1.25648	-0.380839	0.318272	0.0879816	1.42797	-0.204007	0.479897	0.572926	0.447059	0.865676	1.42986	1.34471	1.60507	1.48728	1.6031	0.246777	1.65076	-0.659021	-0.153746	0.536188	0.428324
321	0.439958	0.334258	-0.254181	0.995419	0.36394	0.401136	0.687563	0.716185	0.272953	0.372598	0.851641	0.651168	0.137189	0.588767	-0.237811	0.584847	1.08013	0.72981	0.405494	0.364697	2.27928	-0.554743	1.07589	-0.335881	0.945772	1.59089	-0.440008	0.182268	1.93829	1.04748	1.12196	0.414113	0.813118	0.925983	0.800443	-0.290086	0.712088	-0.429386	1.08656
322	1.05986	0.48843	0.0182639	1.25516	0.0646471	0.492379	0.606741	0.724449	0.198283	0.300501	0.826851	0.662967	0.33421	0.503518	0.467974	-0.384709	0.978688	0.657441	1.71856	0.60366	1.62335	0.435487	0.0100913	0.0650336	0.494912	0.0461281	0.602192	1.23292	1.0411	0.991731	0.533388	-0.12515	1.21311	1.99294	0.0779872	2.22529	0.956195	0.908241	0.598722
323	0.297715	-0.00090379	0.109159	1.10901	0.326403	1.25492	0.196577	0.685903	-0.13193	-0.392039	0.515046	0.40445	0.21171	-0.0843987	0.375165	0.445302	0.936651	0.776475	0.287376	0.749365	2.1706	0.104757	1.35329	-0.42759	0.0801558	1.11874	0.528278	1.23748	-0.191515	1.4798	0.503652	2.2213	0.891446	0.957347	0.656732	1.08522	0.584729	0.195575	-0.720262
324	0.00504062	-0.0373228	0.209316	1.0667	0.0164331	0.904273	0.368823	0.723991	0.538611	0.32511	0.865707	0.57262	-0.134034	0.328069	0.303359	0.200952	0.730955	0.712129	1.11717	0.370525	0.1677	0.464723	0.631823	-0.180007	1.15301	0.903661	-0.0730298	-0.528475	0.676553	0.575996	1.65376	1.22228	0.880393	1.05341	-0.23497	1.23847	-0.143083	0.00917893	0.53097
325	0.55573	0.376375	-0.325977	1.17209	0.272345	0.902589	0.584981	0.217673	0.0688127	-0.0679638	0.337127	0.277209	-0.0301885	0.104489	0.0169353	0.601279	0.489745	0.961446	1.09636	-0.24794	0.373871	0.144452	1.28325	0.113134	0.0942602	0.732185	0.1411	1.3026	0.330023	1.22	1.84574	0.521317	0.814671	0.8487	0.223775	1.38868	-0.406311	0.301061	0.501446
326	0.239512	0.442076	-0.122725	0.980414	0.0782923	0.511978	0.340975	0.642735	0.297842	-0.354812	0.493922	0.305136	0.156673	0.423859	0.457356	0.0727989	0.685771	0.62271	1.62736	0.557063	-1.04189	0.0927474	1.03235	-0.0274355	0.0563744	0.974252	0.242013	2.13628	1.58081	1.25742	2.0325	0.969231	1.214	1.21356	1.16299	0.424454	-0.200181	-0.013147	0.315805
327	0.536228	0.475832	0.194214	0.763553	0.196033	-1.37139	0.622185	0.727812	0.121809	-0.153182	0.334236	-0.500897	0.198902	0.191995	0.243196	0.651222	1.00605	0.403868	1.17205	0.611602	0.127202	0.223946	0.535891	-0.00331319	0.925408	0.653787	0.124757	1.93624	1.5779	0.526818	1.95665	0.247562	-0.690637	0.843053	0.493918	0.841759	0.171901	-0.183443	0.363508
328	0.477326	0.437969	0.215143	0.839853	0.128888	0.457081	0.20424	0.427339	0.18701	0.552596	0.689405	0.541781	-0.0213565	0.292049	0.475581	0.542284	0.802086	0.868759	1.24495	-0.0233198	0.306773	-0.290913	1.04472	-0.556898	-0.204406	0.0321131	0.381681	0.625087	1.51256	0.904975	1.71172	0.993415	0.494364	0.477947	-0.81907	0.373144	1.03991	0.894824	1.3677
329	0.619393	0.325295	-0.0299044	0.955796	0.422659	0.786858	0.514739	0.354865	-0.00325704	0.203473	0.372646	0.451986	0.110683	0.254679	0.211499	-0.0766257	0.638837	0.553378	1.60702	-0.512036	0.333306	0.0579343	0.0202381	0.256268	0.817186	1.32346	0.0362777	0.937171	0.72888	1.1742	2.21081	0.732399	1.79648	0.0646449	1.52796	1.69416	0.477787	0.662882	1.10935
330	0.659535	0.467705	0.429773	1.17895	0.58273	0.677023	0.260408	0.100169	0.12731	0.0768115	0.230059	0.305787	-0.29372	0.176174	-0.00277188	0.289707	0.720441	0.963662	0.987309	-0.546989	-0.426558	0.0213104	0.702934	0.258278	0.294402	-0.351337	-0.0726103	1.77278	0.907986	1.29085	0.969609	1.26057	-0.0289239	1.16053	-0.0733879	0.406952	-0.346111	1.4182	0.495812
331	0.57056	0.194557	0.514187	0.781943	0.285531	0.539486	0.449471	0.436134	-0.077957	0.309164	0.432657	0.644336	-0.321954	0.136802	-0.0450038	0.328319	1.06786	0.553774	1.05633	0.125785	1.79747	0.627548	0.321632	-0.246431	0.528867	0.426584	0.309786	-1.13504	0.630655	0.73687	0.822917	0.52881	0.811824	0.940977	0.51792	1.37393	1.48272	0.434391	1.45038
332	0.346003	0.184264	0.113593	0.917045	0.211239	0.496972	0.205496	0.696439	0.2044	0.290107	0.331692	0.465032	-0.301733	0.337125	0.607971	0.392778	0.659742	0.944705	2.27543	0.525143	0.835381	0.271687	0.650854	0.397619	0.670624	0.680222	0.49175	-0.159314	0.366741	0.956455	1.69309	1.09274	1.02849	1.06265	0.541006	-0.403304	0.321611	0.0417694	0.81199
333	0.300271	0.0942967	-0.148526	0.839791	0.186525	0.737755	0.419847	0.322148	0.201213	0.390588	0.420581	0.571324	-0.0162755	0.121648	0.450755	0.229583	0.701285	0.510981	2.14511	-0.234967	0.68893	0.526075	1.34712	0.284397	0.518706	1.40919	0.366549	1.39921	1.3728	0.733048	2.34742	0.70565	1.70211	1.54551	-0.435585	-1.16974	0.516006	0.194687	0.384183
334	0.0929457	0.553289	0.875944	1.03096	-0.00709294	0.142121	0.110539	0.460777	-0.0147251	-0.284845	0.667722	0.660442	0.257672	0.387963	0.216967	0.0244491	1.08937	0.883814	1.52867	-0.0108104	0.70549	0.24197	0.532242	-0.0920547	0.111068	0.698977	-0.623548	1.78257	0.859455	0.98393	0.71656	1.01916	0.489729	0.856888	1.83349	1.01599	0.549992	1.07189	0.899265
335	0.0513409	0.687204	0.429152	0.797539	0.0783653	1.04778	0.425288	0.464352	0.332682	-0.313109	0.169938	0.673716	0.153752	0.0476993	0.403766	0.58646	0.659866	1.14132	1.48717	-0.625881	1.17717	0.64443	0.314966	0.28983	0.360822	0.295914	0.341244	0.584821	1.37384	0.713457	1.5193	0.773179	0.963614	1.3132	0.403859	-0.00155966	1.25622	0.0983799	0.239777
336	0.432729	0.355244	0.107531	0.901532	0.313206	0.975057	0.517695	0.472032	0.144715	-0.2847	0.395767	0.393553	-0.0880824	0.0528596	0.207835	0.283981	0.727066	0.536658	0.385176	-0.061358	0.832412	-0.0722618	0.655408	-0.791095	-0.0872663	1.28173	0.343286	0.124992	1.80238	0.849214	1.33537	1.57019	1.16288	0.167308	0.630204	0.911466	1.05731	1.22974	1.48764
337	0.322329	0.303037	0.114094	0.863522	0.0790012	0.939856	0.0189182	0.154947	0.0698497	-0.0641827	0.447093	0.59125	0.148213	-0.145777	-0.0277327	0.0432406	0.416351	0.402856	0.818161	-0.576123	1.03379	0.299482	0.247628	0.273561	0.399656	1.17333	-1.11445	1.69002	0.944171	0.262847	1.00801	0.852771	1.40286	0.717799	1.37446	0.318026	-0.343485	-0.410606	-0.208921
338	0.536621	-0.0495793	0.647316	0.95422	-0.0137909	0.801434	0.318516	0.0814843	-0.234556	0.257675	0.481837	0.456869	-0.0516998	0.416743	0.503005	0.327815	0.682972	0.317061	0.564059	-0.41558	1.77859	-0.299964	0.580938	0.625561	0.867985	1.10398	0.578732	0.313076	1.78031	0.943605	0.903769	0.647121	0.686028	0.998824	0.429204	0.919898	0.204987	0.262146	-0.963978
339	0.427444	0.588134	0.0332073	0.757015	-0.091361	0.607147	0.147632	0.422782	0.0532113	0.505937	0.222605	0.45132	0.0295792	0.509165	0.308239	-0.205101	0.926137	0.838672	1.43267	0.163289	0.868607	0.724335	0.804507	-0.121242	-0.388652	0.111482	0.0961228	1.5498	1.52295	0.714888	1.27057	0.933677	0.285475	0.423071	0.434674	0.968519	0.394091	-0.0693357	0.602326
340	0.301516	-0.619829	0.868685	0.872434	0.00760705	0.793801	0.125948	0.852113	0.076944	0.118014	0.42671	0.109784	0.223406	0.189602	-0.112797	0.061649	0.624126	0.823381	1.80151	-0.402808	0.534287	0.380884	0.355037	-0.648553	-0.241845	0.666281	-0.509519	0.649509	1.65789	0.948369	1.05913	1.78507	0.496965	1.06062	0.517465	-0.0935977	-0.0316214	-0.0237488	-0.22409
341	0.296602	-0.175472	0.36464	0.322452	-0.0151542	0.0673527	0.325667	0.365583	0.239375	0.465619	0.249835	0.475359	-0.309589	0.100353	0.162019	0.252629	0.747334	0.11089	1.89047	-0.10667	0.507862	-0.324348	0.202231	0.211171	0.31387	0.831663	0.103731	0.848571	1.4257	1.23365	0.31566	1.18352	0.414707	0.732763	0.695936	2.1133	0.645465	-0.596671	0.604772
342	0.637455	0.443635	0.145368	0.721566	0.107409	0.329862	0.324392	0.169904	0.218438	0.405413	0.535766	0.22181	-0.274175	-0.177608	0.235212	0.447903	0.674043	0.608497	1.12739	0.0803723	0.73887	-0.362421	0.314906	0.105783	0.397917	0.648191	0.804166	1.31787	1.69056	1.03782	0.365494	0.799434	0.840923	0.138366	1.45188	1.3144	-0.816808	-0.200903	-0.297101
343	0.285704	0.0783984	0.837075	0.644244	0.752627	0.238363	-0.1489	0.70791	0.152035	0.240773	0.285857	0.286227	0.215118	0.304643	0.221224	0.151473	0.485301	0.593918	1.11762	-0.406854	0.626726	0.501768	0.633561	-0.0585205	0.433972	0.410442	-0.474922	1.24534	1.56456	1.45756	1.80436	1.45668	0.351747	0.0129884	1.2811	0.428965	1.00122	0.285485	0.467692
344	0.591045	0.450226	0.0230402	0.837198	-0.233391	0.0216613	0.267309	0.564404	0.179074	0.198641	0.213063	0.488748	0.442106	0.294104	0.189102	0.0971955	0.599743	0.668087	1.37404	0.171343	0.27468	-0.0784081	0.555952	-0.27602	0.671437	0.847759	0.212458	1.00625	1.38113	0.411575	2.19165	0.967019	1.36081	1.54834	1.11868	0.497602	-1.07025	-0.664221	0.153539
345	0.358015	0.0645247	0.307489	0.840159	0.110748	0.737646	0.416697	0.594613	0.158423	0.0636875	0.440442	0.272953	-0.271658	0.464232	0.328792	0.469739	0.556411	0.289575	1.15474	-0.246375	-0.918974	0.483838	-0.117001	0.152228	0.449663	0.519633	0.32543	1.01493	0.631215	0.745212	1.26426	0.627476	-0.925393	1.09867	0.347179	0.660412	0.107754	-0.714999	1.73868
346	0.261461	0.0698479	0.0611935	0.960286	0.0356231	0.333944	0.451444	0.179773	0.227035	-0.364857	0.377518	0.730516	-0.181805	-0.144202	0.315968	0.602953	0.436248	0.353815	0.745192	0.471958	-0.41892	-0.216433	0.32756	0.0966752	0.232348	0.624748	-0.272512	0.85572	0.463566	1.14846	0.763715	1.30756	0.848212	0.732335	0.989401	1.03377	-0.0367462	0.18569	0.321987
347	0.364174	0.100268	0.15193	1.00407	0.379814	-0.19011	0.497575	-0.03415	0.0726604	0.11081	0.572535	0.1053	0.635404	0.371049	0.130453	0.63239	0.521	0.390721	0.636708	1.39221	1.0815	0.195827	0.342833	-0.126599	-0.206577	-0.350766	0.160903	0.703302	2.22624	0.32128	1.45864	0.982074	-0.130453	0.333765	0.152063	0.407729	0.823837	0.912382	1.15981
348	0.245082	0.349697	-0.12156	0.435394	-0.0517274	1.09847	0.0727877	0.607527	0.246695	-0.0347132	0.553784	0.3216	0.160492	0.0961278	0.156729	-0.231293	0.769782	0.501418	0.53556	0.381692	1.05537	0.249526	0.151937	0.647991	0.286736	0.639789	-0.315731	1.68793	2.05995	0.499104	2.46848	0.643108	0.390586	-0.0113288	-0.475836	0.327974	0.232498	0.324003	-0.24894
349	0.400384	-0.609992	0.523594	0.823795	0.0610856	-0.159094	0.413668	0.286233	0.356971	0.526432	0.0752484	-0.148663	0.516112	0.27868	0.325418	0.262044	0.368224	0.704822	0.802338	1.36248	1.61348	0.595292	0.251318	0.340744	-0.645544	0.261944	1.05555	1.12146	1.35601	1.36749	1.66066	1.38743	1.09719	0.182337	0.563405	1.19765	0.343998	-0.755983	0.392477
350	0.155145	-0.0616364	0.0467253	1.09085	-0.0203384	0.0139633	0.195842	0.377946	0.32144	0.12347	0.335315	0.473114	-0.0889477	0.234223	0.270454	0.109555	0.868237	0.853264	0.163377	1.12608	0.353937	0.409131	0.620373	-0.289571	-0.180181	1.15748	-0.699773	0.610898	1.08649	0.187382	0.640895	0.636919	0.769488	0.367785	0.441804	1.4841	-0.0834909	0.601179	0.242928
351	-0.341338	0.173099	0.378069	0.799209	0.491102	0.355504	0.473027	0.635196	0.0397293	-0.00443372	0.440771	-0.154555	0.292281	0.461265	0.477198	0.499761	0.59211	0.561091	-0.0494998	0.526415	1.10096	-0.273999	0.21222	-0.0351593	0.275588	0.699141	-0.340637	1.059	2.03384	0.283133	0.713858	0.302061	0.728671	1.34571	1.04453	1.29861	0.696907	0.85346	0.748528
352	0.914602	0.102413	0.154895	0.981658	0.178483	0.653144	0.479886	0.507253	-0.0274556	-0.0656358	0.230687	0.236241	-0.173481	0.202198	0.343989	0.129153	0.163598	0.844297	0.411711	-0.381249	1.12843	0.127695	0.249894	-0.00641281	0.400226	0.991878	0.147862	0.813547	0.404052	1.28861	0.307589	0.671879	0.648953	0.140708	1.69485	0.0776565	0.798036	0.737096	-0.191786
353	-0.242491	0.249953	0.0260935	1.16528	-0.000494533	1.26551	0.368756	0.676215	0.608817	0.127298	0.109386	0.0883043	-0.22511	0.288613	-0.0332605	0.137238	0.505671	0.398613	0.845388	0.11448	-0.214146	0.207421	0.134889	0.203107	0.493599	0.445327	-0.111264	1.66548	1.04994	0.198787	1.28156	0.437838	1.58801	0.534553	0.52017	0.618612	-0.322985	0.737695	-0.0157162
354	0.190744	0.59422	0.313716	0.606732	-0.190395	0.514494	0.262271	-0.216553	0.633962	-0.145824	0.435939	0.376548	-0.323263	0.457974	-0.0289448	-0.0329335	0.525814	0.373561	0.444184	-1.44993	-0.345398	0.427137	0.486002	-0.0238484	0.299011	0.587199	0.248067	1.23447	0.922885	0.745679	0.291666	0.584375	0.087632	1.5548	-0.497299	-0.0771821	0.837819	0.171936	-1.48075
355	0.307849	-0.240632	0.180652	0.74287	0.0584323	0.719452	0.299464	0.649948	0.0729159	0.112625	0.358248	0.103718	0.062926	-0.163795	0.152215	0.0841705	0.4188	0.674027	0.276461	0.419904	0.633483	-0.0841632	0.652486	-0.364609	0.0916427	0.667357	0.175431	1.44876	1.13718	1.16939	0.926007	1.53278	0.296061	0.670879	0.203997	-0.332449	-0.11526	0.0579273	-0.052042
356	0.206338	0.327434	0.177237	0.619072	0.391303	0.716462	0.180875	0.459302	0.11458	0.0761839	0.367905	0.19724	0.0422264	0.483651	-0.147188	-0.0175898	0.203392	0.489746	0.529388	0.466112	1.58517	0.0760553	0.387945	0.186469	-0.0667757	0.293098	0.0337046	0.468494	1.01411	0.901838	0.552639	0.0638548	1.27903	0.0420195	0.676831	0.563907	-0.352386	-0.178241	0.160971
357	0.280353	0.225482	0.145913	0.586656	0.157176	0.850528	0.421722	0.272866	0.0407363	-0.0303633	-0.0127874	0.168938	0.385392	0.0937303	0.402483	-0.255266	0.459314	0.512534	-0.0415203	-0.579186	0.755084	-0.0271744	0.272537	0.00209014	0.200361	0.298174	0.345391	0.700324	1.71949	0.605061	1.15724	1.03782	1.02193	0.790288	1.03798	0.48082	-0.417831	0.87979	0.0126957
358	0.540421	0.0764764	0.150765	0.570381	0.0407683	0.511364	0.464862	0.53783	0.144655	0.170974	-0.359633	0.549381	0.0852991	0.20423	0.262482	-0.0871707	0.0254523	0.455288	0.926488	0.241784	-0.378909	0.382017	0.994443	0.157124	0.222096	0.287978	-1.24705	0.0748589	0.828702	0.507094	1.37582	0.733482	0.968479	0.560508	-0.324953	-0.216847	0.500871	0.50954	0.16197
359	0.255434	0.000724923	0.464036	1.26141	-0.174423	0.784144	0.512191	0.37169	-0.324677	0.0386977	0.415612	0.338848	-0.127383	0.202357	0.151651	0.0286026	0.331702	0.534588	1.22015	0.335915	0.618253	-0.087589	-0.375955	0.209597	0.286103	0.195786	0.336828	1.39655	0.77299	0.401032	1.1821	0.768784	0.548396	0.0961758	0.770077	0.666177	-0.503865	-0.377803	-1.01504
360	-0.13124	0.50004	-0.318585	0.92897	0.307751	0.30333	0.410067	0.168552	0.0329807	-0.54381	-0.301778	0.378625	-0.324403	0.236766	0.0942577	0.349187	0.534086	0.110248	0.971974	0.227583	0.438321	0.0875208	-0.386233	0.0711347	-0.487653	-0.158194	0.200719	0.352762	0.600838	0.934785	1.69404	0.612931	0.960088	-0.847539	-0.520598	1.04624	0.410621	-0.918598	1.0037
361	0.574272	-0.0325686	0.464581	0.961038	0.234637	0.41664	-0.217005	0.611604	0.0943489	0.188868	0.887075	0.263749	0.104647	0.101704	0.121007	0.0895943	0.705256	0.458261	-0.297101	0.986971	0.636734	0.889752	0.061348	0.118502	-0.479076	0.350982	-0.166448	1.68709	1.33856	-0.270492	1.19507	1.02583	1.38851	1.98207	0.605228	0.992974	0.287167	1.02707	-0.319901
362	-0.257888	0.044787	0.0885527	0.793381	0.125256	0.513586	0.193985	0.680025	-0.287959	-0.0678525	0.539054	0.643643	0.0287675	0.361417	0.112634	0.386447	0.0569744	0.582636	-0.10346	0.984378	0.0583532	0.886106	0.957907	0.274614	-0.196338	0.625552	0.321291	1.12511	0.978616	0.790496	0.816665	0.235487	0.911842	0.135456	0.857094	-0.429159	0.246397	-0.244921	0.0701231
363	0.377016	0.436325	0.49652	0.84692	0.0900846	0.855574	0.41088	0.303248	-0.112842	0.0812171	0.405568	-0.114171	0.238185	0.282204	0.169832	0.591944	0.70612	0.568371	0.267854	0.955641	-0.00545399	0.194565	0.610792	-0.154633	-0.13244	0.693391	-0.161455	0.431003	1.10827	0.609543	1.36866	0.722168	1.91168	0.680648	0.855004	0.52368	1.07937	-0.703309	0.0952972
364	0.785135	0.362288	0.01338	1.00784	-0.364146	0.816674	0.279007	0.346653	0.131744	0.589801	0.449396	0.39805	0.0172073	0.124457	-0.0164663	0.438063	-0.202281	0.433961	-0.29323	0.26591	0.826628	0.243255	-0.175263	0.500226	-0.247221	0.151481	-0.174081	1.91414	1.97391	0.741735	1.45964	0.222003	1.22786	0.254288	1.09406	0.346828	0.168021	0.535871	0.747301
365	0.309858	0.736224	-0.13955	0.844571	-0.0384078	0.831822	0.494312	0.19404	-0.168965	0.2858	0.188608	0.536234	0.153967	0.111532	0.285042	0.369995	0.391825	0.11946	0.399337	-0.629849	-1.13673	1.09661	0.658351	-0.268512	0.350805	0.157595	-0.146628	1.05044	1.47291	-0.303182	1.36346	1.51752	0.945046	0.719604	0.847227	0.521985	-0.566708	0.534958	-0.838695
366	0.0587446	-0.056205	-0.104311	1.00203	-0.190083	0.533632	0.490869	0.25611	0.240638	0.232089	0.629565	0.470594	0.219273	-0.0127699	0.173523	0.113265	0.484725	0.150145	-0.181231	1.01288	-0.0188462	0.319874	0.440408	-0.212882	0.913907	0.30006	-0.0754596	0.209042	1.39317	0.77223	0.852723	0.945319	0.0140987	-0.411297	0.28286	0.307473	-0.118066	0.466894	-0.0712461
367	0.0549008	0.626592	0.0580579	0.894745	0.3223	0.242985	0.140765	0.879946	0.0209415	-0.664146	0.204338	0.0663319	-0.228546	-0.101983	0.0788107	0.299527	0.466947	0.614784	0.272144	0.0725003	1.30362	0.306736	0.34789	0.248254	-0.0381249	-0.689368	-0.41684	-0.810463	1.80913	1.25163	0.256325	1.36678	0.341308	1.07384	0.885529	-0.490109	0.459267	0.510982	-0.266479
368	0.528474	0.210118	0.3275	0.410564	-0.0578574	0.0948196	0.53306	0.525443	-0.126249	0.205266	0.201106	0.303246	-0.18503	0.0291882	0.643574	-0.476207	-0.0827147	0.996603	0.282529	1.28613	-0.301147	0.175875	0.758727	-0.16969	-0.807099	-0.250081	1.49834	0.101493	-0.14483	0.836673	0.166214	0.38282	-0.10342	0.947077	0.0704491	-0.00465655	0.70961	0.413566	-0.361526
369	0.418074	0.280619	0.0355637	1.01131	0.227352	0.296441	0.171589	0.666693	-0.104681	-0.000569171	0.169238	0.495685	-0.821742	0.398356	0.0904904	0.110261	0.480219	0.579803	0.217204	-0.0447009	0.289054	-0.219048	0.0634296	0.550738	-0.19768	-0.196804	1.00904	1.26933	0.758826	0.512028	1.12264	1.01443	0.680224	1.29259	0.813145	0.214709	0.739575	0.277732	0.802074
370	-0.212156	0.00829336	0.479208	0.897332	-0.00193619	0.185476	0.63907	0.206781	0.291425	0.0369139	0.641751	0.523325	-0.233377	0.175788	-0.193227	0.339993	0.309131	0.258976	0.509099	-0.527515	-0.212576	0.663872	0.652722	-0.0471519	-0.730364	0.105522	0.202112	0.46551	0.99737	0.251407	1.35026	1.31674	0.390427	0.159136	0.689623	0.607754	-0.212906	0.833716	0.164568
371	0.159666	0.266193	0.333043	0.8259	0.378281	0.617625	0.332399	0.147114	0.0206259	0.0424015	0.239156	0.610557	-0.279875	0.0355906	-0.066535	0.170325	0.547851	0.250136	-0.592091	-0.123179	-0.0265791	0.836787	1.00617	0.215237	0.572028	0.368117	0.583359	0.749585	2.12741	0.712373	0.425857	1.08516	-0.0368428	0.641787	0.523498	0.52459	-1.88594	0.543363	-0.262524
372	0.275351	0.43441	0.104579	0.639822	0.00418213	0.784728	0.270745	0.433633	-0.0489037	0.000553094	0.290376	0.615052	-0.371749	0.18841	0.319028	0.573354	0.342093	0.170961	0.402108	-0.329132	0.137304	0.595024	0.00318708	0.402208	-0.325465	-0.159389	-0.0068195	0.439801	0.955999	1.17509	0.117888	0.485646	-0.0410537	0.13697	0.937892	0.214959	-0.532354	-0.495597	-1.07097
373	0.403376	0.290716	0.276811	0.909117	-0.250821	0.591869	-0.00870145	0.231109	0.430529	-0.212238	0.691186	0.566537	0.0527389	0.0488387	0.147092	0.101571	0.339069	0.544695	0.280176	0.495122	0.627434	0.813836	0.588063	0.116907	-0.104887	1.2094	-0.722188	0.185288	0.538229	-2.39845	1.23486	-0.0211569	1.14766	-0.0567862	0.779288	-0.41166	0.311148	-0.353543	0.108989
374	0.310601	0.350361	0.0958818	1.43922	0.192939	0.0656674	0.218638	0.134338	0.11225	0.139949	0.217014	0.511741	-0.0895806	-0.147264	0.0768595	0.10024	0.229173	0.134032	0.382152	1.96577	0.36482	0.163252	0.340641	0.61009	0.625019	0.552594	0.737762	1.2401	0.648093	1.08777	1.2026	1.24083	1.1565	0.0550076	-0.594266	-1.20762	0.447101	-0.559108	0.285243
375	0.0327553	0.25723	0.335279	0.223645	-0.224397	0.481069	0.137322	0.447865	0.282301	0.159729	0.324432	0.342481	0.0881632	0.185901	-0.0336977	0.276662	0.924121	0.926367	1.33816	-0.763088	-0.131991	-0.332189	0.0445832	0.245989	1.03797	0.532669	0.180875	0.391859	1.16632	0.681115	0.999583	1.05792	0.310981	-0.384576	0.556658	0.704944	0.311828	-0.219065	-0.00854325
376	0.419407	0.0766921	0.115475	0.721011	-0.000620292	0.64015	0.390894	0.441105	0.165351	0.0924799	0.155049	0.411104	-0.415011	-0.0290675	0.270708	0.41038	0.666656	0.228496	0.602419	0.263973	1.67738	0.73199	0.196504	-0.397018	-0.0810814	1.46098	0.310269	1.63289	1.70568	0.0890691	1.15205	0.35488	0.239886	0.267903	1.35301	1.68703	0.0234452	0.211264	-0.376646
377	0.523495	0.453205	0.391081	0.955392	-0.0502964	-0.324038	0.179188	0.636445	0.200417	0.368965	0.347903	0.347258	0.20571	0.258144	-0.0428657	0.0135815	0.523366	0.769859	1.22842	-0.895681	0.548967	-0.0927593	0.112349	-0.303584	-0.703195	0.302577	0.184127	0.899409	1.07332	1.07396	1.13697	1.52509	0.720203	0.338937	-0.13544	0.938263	0.0956561	-0.193559	-0.217421
378	-0.217507	0.189789	-0.0480911	0.807022	-0.635457	0.338772	0.235096	0.267187	0.152516	-0.26244	-0.0517626	0.500057	0.188543	0.0242062	0.55458	0.0799162	0.787539	0.524856	0.750518	0.369324	-0.130731	0.192162	0.60284	-0.620274	0.293882	-0.0220276	-0.135886	0.638957	2.20872	0.766889	0.80564	0.0290787	0.946087	0.00265773	0.820383	0.237216	-0.235782	-0.376023	1.26041
379	0.160649	0.48645	0.134453	0.93373	0.16392	0.607097	0.384354	0.420735	0.25902	0.0631773	-0.0620791	0.302204	0.0414933	-0.326058	-0.168524	-0.232301	0.622068	0.587902	0.630694	-0.0226993	0.0167159	-0.261988	-1.49809	0.148573	-0.527229	-0.116904	0.143967	0.758865	0.85442	0.501832	0.574427	0.932876	1.19849	-0.160325	0.519213	-0.974238	-0.566531	0.16274	1.64497
380	0.0778763	-0.091996	0.33355	0.61648	-0.15115	0.604319	0.345676	0.299638	0.202431	0.121807	0.198125	0.17758	0.0761489	0.196914	-0.0350449	0.310515	-0.265572	0.648958	0.998867	-0.257741	-0.396591	-0.0216005	-0.045388	-0.457982	-0.241658	0.526202	-1.2977	0.842503	0.383893	0.604346	-0.698509	0.742309	1.25784	-0.0369962	0.176098	-0.174175	-0.120702	-0.0397033	-0.522766
381	0.204896	0.295841	0.12549	0.913441	0.149784	0.485476	0.345252	0.434582	0.138177	0.0529038	0.0546685	0.474096	-0.363707	0.0996118	-0.152302	-0.148888	0.293308	0.455062	1.38857	-0.144986	-0.774296	0.148606	0.273782	0.333984	-1.26004	0.824794	-0.516778	0.513755	1.01545	0.0379813	0.594094	1.55002	0.57587	-0.822968	0.195078	0.656444	0.56703	-0.439774	-0.504626
382	0.302149	-0.134558	-0.402081	0.473331	0.155524	0.223729	0.184498	0.3783	0.0311621	0.154325	0.369564	0.0690869	0.255756	0.0680569	-0.148646	0.219764	0.448861	0.284521	-0.290892	0.785307	0.182165	0.604657	-0.00436909	-0.688885	-0.236533	0.584684	1.32639	-1.11519	1.16059	0.841357	1.06482	-0.246098	0.42175	-0.353992	0.53228	0.0990546	0.056185	-0.644634	-0.482716
383	-0.0570062	-0.0813286	0.151633	1.12192	0.0301774	0.263961	0.5231	0.380288	0.0532113	-0.0552572	0.35431	0.288101	0.152232	0.187617	0.339053	0.226478	0.617541	0.0297572	-0.216292	0.435047	0.822565	-0.265221	0.309588	-0.487948	0.132118	0.962448	-0.238603	1.02947	1.44984	0.552202	1.08047	0.395531	0.604103	-0.768753	0.873293	0.301964	-0.167948	-0.260589	0.432525
384	0.226365	0.432484	0.283855	0.870666	0.000645508	0.347502	0.368568	0.0808336	0.124109	0.0969566	0.0916029	0.2723	-0.0259906	0.372764	-0.247945	-0.246939	0.201807	0.436188	0.677644	1.20802	-0.228486	-0.660289	0.529059	0.0068639	-0.266817	0.486572	0.490326	0.664431	0.780635	0.678373	0.616882	0.576789	0.0485851	0.395093	0.628687	1.22825	-1.04746	-0.918887	0.90364
385	0.28459	-0.0634928	0.405283	0.86656	0.00546408	0.599052	0.210331	0.726106	0.159249	-0.188173	0.213001	0.133127	-0.501418	-0.174495	0.146238	-0.0847714	0.18512	0.327039	1.06391	-0.640255	-0.0590511	0.0607373	0.902719	0.264931	-0.790262	0.236834	0.71553	0.962994	1.657	-0.769915	0.430492	0.634652	0.160502	0.455291	0.499393	0.261053	-1.28012	-0.225825	-0.219694
386	-0.00118372	-0.476749	0.23276	0.813602	-0.205036	0.297237	0.179547	0.312164	-0.0108172	-0.0981599	0.0764641	0.268678	0.157224	0.139176	-0.137559	0.295293	-0.0742375	0.409564	-0.0468203	0.94298	0.876451	-0.424819	0.399323	0.501821	0.296786	0.347762	-0.0362619	0.261512	1.52795	0.663746	1.46571	0.831234	0.202839	0.220698	1.34703	-1.02531	0.077747	0.459209	0.663022
387	0.415061	0.547381	0.478923	0.624692	-0.216701	-0.322126	-0.0215886	0.05588	0.414191	-0.0403369	0.442546	0.467829	0.115027	-0.0913003	0.0033799	0.512786	0.568139	0.441276	-0.0639598	-0.183103	-0.534935	-0.00123133	0.0591021	0.32413	0.174807	-0.125641	0.0305591	0.367326	1.45726	0.481867	1.03248	0.533399	1.26633	0.246372	0.0585639	-0.0602193	0.658765	1.23665	0.511976
388	0.51524	0.330014	0.215885	0.573487	-0.0108542	-0.426157	0.0300668	0.246382	0.320703	0.0458858	0.604604	0.308748	-0.0170728	-0.0922803	0.0512867	0.260895	0.604085	-0.127319	0.153848	0.879544	-1.09863	0.361178	0.244441	-0.0366083	0.306689	1.00321	0.259376	1.04184	1.57136	0.291154	0.666148	0.681637	0.929398	0.116763	0.111544	-0.17341	0.0281415	-0.100234	-0.472274
389	0.2123	0.131677	0.466874	0.309143	-0.149187	0.202502	0.292821	0.113017	-0.0135377	0.0842067	-0.102889	0.363695	0.220446	0.026636	-0.159126	0.255371	0.560855	0.267822	0.537595	-0.0465716	-0.394021	0.0167659	-0.0434191	0.398256	0.22953	-0.100954	0.137246	1.14029	0.959706	0.684276	1.57694	0.220218	0.219396	0.525129	1.58079	-0.647859	0.365255	0.726185	1.06885
390	0.0534812	-0.129822	0.267645	0.550124	-0.0653413	-0.136714	0.344739	0.384886	0.248604	0.415497	0.672403	0.2892	0.0010416	0.0372897	-0.190898	0.306684	-0.108332	0.294004	0.527218	0.507442	-0.0208453	-0.996933	0.000620887	-0.748812	-0.562675	0.541565	-0.699697	0.559047	0.559176	0.327993	0.987897	0.568114	0.444632	0.54505	-0.53341	-0.0891957	0.871873	-0.200461	-0.287466
391	0.0537652	0.222408	-0.32015	1.16596	0.151764	0.226803	0.105692	0.193087	0.0327402	0.352734	0.126884	0.0214804	0.483148	-0.109431	0.0122897	0.404936	0.291827	0.671885	-0.157611	-0.253319	-0.586743	0.0142506	-0.279879	0.592286	0.125827	0.875445	0.552433	0.293109	0.641426	0.785014	0.976083	0.78455	-0.168067	0.673572	1.11598	-0.119994	-0.164507	0.531256	0.539156
392	0.210706	0.236147	-0.78988	0.437426	-0.223382	0.423776	0.15341	0.258977	0.061989	-0.0995016	0.0743014	0.207125	0.247249	0.186802	0.168703	0.476413	0.681368	0.37146	0.804897	0.666087	-0.439948	0.216523	0.407432	-0.0647072	-0.565276	0.0427819	-0.0853896	0.207201	-0.0233786	0.545077	0.220087	1.73137	0.171804	0.769873	0.220165	1.09883	0.217442	-0.939996	0.15389
393	0.291054	-0.18864	-0.644532	0.137421	0.156311	0.238566	0.123584	0.338078	-0.0260879	-0.0343546	0.435505	0.0966722	-0.398416	0.0240426	0.116258	0.0366474	0.552995	0.458007	0.589501	0.932896	-0.901948	0.487764	0.193512	-0.440277	-0.366059	0.216345	-0.883379	0.454189	0.463745	0.482629	0.813581	0.515875	0.897491	0.173654	-0.11952	1.09247	0.12465	-0.144726	0.411428
394	0.0887743	0.375519	-0.461019	0.788694	-0.272377	0.390265	0.240327	0.0552951	0.160542	0.295143	0.263602	0.203356	0.195148	-0.427747	0.0464185	-0.0560599	0.37199	0.0748244	0.633572	0.156324	1.46571	-0.487027	0.195119	-0.365623	-1.17698	-0.77014	-1.00988	1.21879	2.04354	0.370081	1.32963	0.614328	1.06571	1.06457	0.244495	-0.984925	0.69825	-1.42544	-0.44548
395	0.101005	0.231785	0.269399	0.312591	0.0494031	-0.325507	0.198947	0.447612	0.0617334	-0.120389	0.411731	0.32118	0.0145041	0.215413	0.25213	0.636463	0.239873	-0.518926	0.237636	-0.353295	0.048228	-0.00999576	0.288832	-0.276229	-0.0187047	0.0425743	-0.0287659	1.04939	2.11101	0.355134	0.951304	-0.173533	0.425395	0.591891	-0.196014	0.776558	0.0412475	0.901944	-0.80003
396	0.134965	-0.0468772	-0.115612	0.176271	-0.337289	-0.206259	0.256598	0.372712	0.0283965	-0.10021	0.296474	0.31221	-0.285024	-0.267581	-0.102138	-0.00506886	0.053744	-0.219172	0.311983	-0.0979476	0.504211	0.668901	0.628514	-0.289179	-0.136382	0.772183	-0.639269	1.06903	1.22067	1.3372	0.277654	0.564699	-0.787438	-1.09441	0.174184	0.725685	-0.745016	0.261067	-0.176305
397	0.144859	-0.988747	0.519819	-0.0388998	-0.283076	-0.166091	-0.0536765	0.29883	0.216589	-0.562904	0.120249	0.697681	-0.153149	0.0150559	-0.626967	0.25027	0.358081	-0.24548	0.621762	0.224276	0.8221	-0.12941	-0.209645	0.0898187	0.849504	0.210719	0.16145	0.460079	1.18485	0.803713	-0.903272	1.52733	1.57474	-0.2685	0.749537	-0.12223	0.900721	-0.0496356	0.0888368
398	-0.251293	-0.0057238	-0.421104	0.624827	-0.485099	-0.130213	0.328473	0.412967	0.076974	0.0343262	0.302762	0.570901	0.0261858	0.0862739	-0.0284242	0.139355	0.466597	0.736791	0.548813	0.205987	2.43554	0.0962397	0.164516	0.230497	-0.119826	-0.455918	0.296646	-0.249673	0.0220678	-0.324872	0.0791777	1.0207	-1.28618	0.621278	-0.24002	0.368945	-0.374753	0.195531	-0.314108
399	0.0370359	-0.0738029	0.209499	0.691312	-0.469184	-0.0579458	0.00531515	0.538324	-0.0974512	0.0317199	0.0243221	0.282179	0.19867	0.155146	-0.251323	-0.16276	0.423388	0.24622	-0.178783	0.494834	0.478316	-0.220358	-0.187674	0.212552	0.0367235	1.08892	-0.798161	0.343734	2.0831	0.335995	-0.134955	0.0127007	-0.0622861	0.591127	-2.75381	0.679045	-0.0313458	-0.453235	-0.133592
400	0.0731807	0.141645	0.0767387	0.204715	-0.0760016	0.468458	0.20787	0.517454	0.0653707	0.199417	0.453356	0.311853	0.115528	-0.0459799	0.382938	0.0252556	0.549168	0.323216	0.483515	0.567749	-0.752937	0.475113	0.667938	0.338294	-0.683123	-0.350603	-0.0450349	1.39146	-0.302575	-1.15094	0.746398	0.539663	0.083466	0.953708	0.0239703	0.678661	1.2931	0.547315	-1.08315
401	-0.117349	0.295404	-0.127255	0.16138	-0.0784302	0.200715	0.459002	-0.325194	0.13481	0.214266	0.231909	-0.0212723	-0.0976366	0.218995	-0.38181	-0.258593	0.20584	-0.311986	1.02204	-0.597835	0.916205	-0.550243	0.214525	0.0801705	0.356036	0.855243	-0.404927	1.52739	-0.498988	0.403003	1.08583	0.976864	0.437261	-0.107792	0.513056	-0.720765	-0.0563457	-0.0321444	0.0124694
402	0.0235171	0.215991	0.434891	0.403263	-0.257067	0.489294	0.408416	0.213846	-0.0946856	0.0848806	0.500613	0.151403	0.112009	-0.0417634	-0.493714	-0.333436	0.507687	0.345668	0.771161	0.183251	0.196851	-0.0406201	0.600511	-0.296919	-0.360547	0.442631	0.382474	0.977212	0.828349	-0.208437	0.126225	-1.00591	0.395096	0.865039	-0.213666	0.705407	0.50926	-0.342134	0.473346
403	-0.0829081	0.0669607	0.112561	0.520996	-0.619573	0.537564	0.240243	0.212223	0.18211	0.159417	0.167	0.475957	-0.0117844	-0.0536723	-0.212517	-0.0908	0.689762	0.230927	0.0436618	1.21719	-0.309998	-0.185351	0.101896	0.0975262	0.687582	0.392164	0.582738	0.972287	1.4355	-0.355678	0.728438	-0.195959	0.500601	0.595735	0.589522	0.204647	-0.488732	0.88764	-0.308634
404	0.237809	-0.258155	0.134434	0.37666	-0.170728	-0.260507	0.154146	0.70246	0.0127351	-0.283909	0.16224	0.604034	-0.438257	0.120026	-0.0654143	-0.483062	0.197198	0.622779	0.256325	1.39864	-0.537698	-0.529889	0.0872243	-0.0147759	0.11309	-0.152155	0.125032	0.747992	1.07386	0.283991	0.0317811	0.841032	0.970603	0.169664	-0.055376	-0.310751	-0.665937	0.0498164	-0.0716391
405	-0.235677	-0.0482699	-0.19278	0.42322	-0.17744	0.6437	0.277729	0.129619	-0.332253	0.0667544	0.0344949	0.403173	-0.144407	0.0115748	0.178121	-0.168506	0.142652	0.154452	0.764956	-0.636681	0.184971	0.239154	0.0607028	-0.36289	-0.130948	0.180075	0.0228903	-0.02974	1.5641	-1.05296	-0.649833	0.392961	-0.15686	1.06269	0.993372	-0.445253	0.610334	0.783269	-0.662032
406	-0.254896	-0.187618	0.838754	0.178708	-0.0162482	-0.30341	-0.132353	0.124597	0.0962878	0.0826578	0.716191	0.266144	0.131157	-0.0964679	0.235622	0.0813679	0.527728	0.282828	0.964395	0.529254	0.0364251	-0.218759	-0.00830979	-0.227516	-0.00968819	0.888774	-0.105487	0.385685	-0.705665	0.0949628	0.705558	0.346591	0.835969	-0.376904	-0.191863	0.709881	0.13657	0.114845	-0.579469
407	0.0902376	-0.303554	0.910037	0.588373	-0.159927	-0.156162	0.256278	0.223066	0.0493335	-0.0614497	0.366599	0.504184	0.225895	-0.130104	-0.119838	-0.127839	0.168516	0.436778	1.2107	-1.08221	1.53287	-0.171299	0.340743	0.248927	0.426552	0.134231	-0.406331	1.08406	0.847245	0.395854	-0.298262	0.199752	-0.280855	-0.100418	0.326857	0.358559	0.399593	0.130094	-0.532525
408	0.126776	0.600065	0.223644	0.634606	-0.223966	-0.351527	0.101797	0.263386	0.049574	0.548586	0.148233	0.488729	-0.296591	-0.17081	-0.346183	0.387274	0.465178	0.0863972	0.892523	0.347386	-0.596222	-0.318247	-0.235561	0.346424	-0.411844	-0.924556	-0.106473	0.659251	-0.323509	-0.0830074	0.621357	0.353236	-0.0378615	0.115128	0.496531	0.514607	-0.827929	-0.733703	0.462262
409	-0.102892	0.215197	0.202392	0.248371	0.0855498	0.450536	-0.238651	0.254259	0.0671142	0.424259	0.227808	0.265785	-0.0984161	-0.0654646	-0.138846	-0.391867	0.316373	0.344553	0.560942	0.719837	-0.00858811	0.102823	-0.180943	-0.023944	-0.326603	0.542805	0.156477	0.066923	1.82587	0.296216	0.892758	0.183084	0.0129332	-0.566197	0.175501	-0.0612605	-0.679414	0.209011	0.405996
410	0.0551411	-0.0260002	0.130988	0.272077	-0.216481	-0.194839	0.111058	0.0967027	-0.178449	0.191799	0.347763	0.0762067	-0.509449	-0.405483	-0.449718	0.0545114	0.09827	0.325303	0.333839	-1.3042	-0.270217	0.403831	0.345446	0.204846	0.389823	0.490401	0.0106691	0.616006	1.13765	1.07274	0.51446	0.507083	0.419093	-0.518615	-0.544063	0.0783611	0.249705	0.105479	-0.818016
411	0.304529	-0.240445	0.369809	0.650186	-0.183549	-0.472337	0.266625	0.285257	0.00269491	0.173462	0.15608	0.0373602	-0.159392	0.298835	-0.0381923	0.0880619	0.500342	0.0263645	0.569018	-1.18268	0.454612	0.001796	0.153453	0.35422	-0.519843	-0.582614	0.0840649	1.1819	0.320977	-0.20243	1.08093	0.332651	-0.547766	0.292654	0.231286	-0.202058	-0.320349	-0.0422098	-0.00281447
412	0.297148	-0.0475315	0.192377	0.315681	-0.228109	0.358728	-0.0671237	0.248119	-0.222202	0.388848	0.276285	0.0534023	-0.117807	0.01246	0.352219	-0.217118	0.452277	0.0701823	0.0552607	0.178565	0.00251969	0.0447337	0.393623	0.587008	-0.327786	0.978345	-0.497678	0.262363	2.0613	0.00454244	0.178602	0.847074	0.675477	0.0958042	0.355984	0.0843977	1.38971	-0.351853	-0.468746
413	0.0591159	-0.275444	0.182767	0.13977	-0.115286	0.645846	-0.159344	0.254781	-0.118764	0.0135596	-0.474015	0.124737	-0.130626	0.00383272	0.32274	0.193149	0.279481	0.355986	-0.480243	-0.171723	0.586105	0.311544	0.284957	-0.0832976	0.497566	-0.632727	-0.436651	0.445132	1.49402	0.290714	-0.165051	0.183132	-0.500398	-0.126859	0.600846	-1.5051	1.07006	-0.772079	-0.410765
414	0.141823	-0.17176	-0.284689	0.440257	-0.482604	0.590859	-0.387662	0.293543	0.204941	0.365212	0.259296	0.0369408	0.105945	0.108499	0.316588	-0.219457	0.729206	-0.05807	0.869782	-0.56199	0.52629	0.0511262	-0.17958	0.342666	0.351109	1.09801	-0.738073	0.701682	0.832932	0.766609	0.467265	0.353374	0.988913	0.279242	-0.318011	0.949179	-0.107809	-0.992844	0.0290113
415	0.558198	-0.0168086	0.0453254	0.599904	-0.00592759	0.42802	0.208478	0.249769	-0.0513085	0.437522	-0.162432	0.050628	0.153956	-0.0747235	0.335965	0.116632	0.209647	0.167955	0.78956	1.35541	1.05807	-0.000415254	-0.223524	0.168751	0.0179174	0.0428006	-0.697528	1.03275	0.197001	0.558789	-0.658655	0.577111	0.0995964	0.141933	0.036021	0.141659	0.264717	-0.717429	0.297168
416	0.277339	-0.0137472	0.0990301	0.13346	-0.0424133	-0.375946	-0.0361181	-0.0807379	0.0852106	0.207872	0.478302	0.310912	-0.213382	-0.0480234	0.171759	0.0053955	0.125595	-0.0777396	0.921617	0.0484521	-1.8262	0.553441	-0.0380024	-0.204375	-0.173576	-0.0123889	0.0499816	0.370684	0.581194	-0.392155	0.399432	-0.744536	-0.506708	1.11168	0.482044	-0.058235	0.908085	0.0501144	-0.520449
417	0.350524	0.32574	-0.0333758	0.506613	-0.151737	0.0675087	0.122826	0.0115899	0.172235	-0.11607	0.0415923	-0.213136	0.249455	0.314896	-0.201004	0.209904	0.322402	0.214558	0.955979	-0.547974	0.870985	0.152446	0.023619	-0.426609	-0.727883	0.480541	-0.431769	0.777777	1.4522	0.296015	0.25745	-0.0924326	0.466605	0.902209	0.664539	-0.360247	0.857511	-0.188894	-0.122917
418	-0.172255	0.0436527	-0.170292	0.339345	0.272251	0.644177	-0.228023	-0.510561	-0.00633823	0.0424695	0.316254	0.10603	0.145764	-0.0768176	0.0843863	0.0476763	0.341476	0.146965	-0.165913	0.256536	-0.0281884	-0.136946	0.138841	0.587162	0.0539894	-0.0696347	-0.365413	1.0264	0.648427	-2.12801	0.290761	-0.0407508	0.695315	0.883222	0.739331	0.331817	-0.114495	-0.54117	-0.851566
419	-0.00411025	-0.123788	0.380673	-0.0203173	-0.55754	0.106526	0.0139936	0.00280327	-0.133328	-0.562877	0.213488	0.294686	-0.498342	-0.122688	-0.697553	0.230732	0.349068	0.557019	0.0128577	0.338962	-0.554983	-0.192525	-0.0615951	-0.402247	-0.432659	-0.188772	-0.386889	0.685789	1.02303	0.312572	0.664035	1.65483	1.12071	-0.29839	0.397788	1.04187	-1.04266	-0.883482	0.384862
420	0.622888	-0.065507	0.188785	-0.170574	-0.412676	-0.241598	-0.0398861	-0.0170336	0.0518286	-0.0378451	0.355423	0.475722	-0.0650013	-0.186679	0.268053	-0.0892878	0.198721	0.621573	-0.151035	0.175515	-0.546682	0.286871	-0.147511	-0.468555	-0.215466	-0.149066	-0.945813	0.736239	0.969421	-0.721592	0.793354	-0.108882	0.390798	0.82414	0.676848	-0.256832	-0.532684	-0.435664	-0.508221
421	0.110439	0.0078523	0.156802	0.240993	-0.299973	0.426217	-0.0128713	0.181377	0.192721	-0.323806	0.310284	0.324459	0.100628	0.0740422	-0.145113	0.0315665	-0.557254	0.0176019	0.904547	0.179606	0.354089	-0.214179	0.485296	0.511802	-0.471691	-0.0229022	-0.134948	0.488291	-0.446422	1.30417	0.425036	-0.990456	0.864609	-0.179914	0.387021	0.640809	1.17664	0.128889	0.358762
422	-0.0764217	-0.0636171	-0.133621	0.532646	-0.243702	0.0477059	-0.0187209	0.149497	0.15238	0.104744	0.133457	0.371513	0.10385	-0.003993	-0.0628511	-0.192943	0.228844	-0.0422828	0.300803	0.541768	-0.191738	0.146645	0.425399	0.109574	0.483688	0.372257	-0.436721	0.239679	0.401851	0.00662313	-0.226501	0.231261	-1.68015	0.29376	-0.881693	-0.199662	0.67372	-0.553853	-1.07693
423	-0.136306	-0.607392	-0.556886	0.261085	-0.32687	-0.099489	0.156762	0.0353656	0.094875	-0.23452	0.121015	0.188303	-0.10442	-0.279341	-0.0215054	0.322754	0.395364	0.155612	0.553839	-0.350181	-1.21125	-0.0757593	0.00439585	-0.143661	0.226573	-0.278572	-1.75116	0.579586	0.611531	0.091231	0.433596	0.846842	0.390595	0.674402	0.979616	-0.0572997	-0.155558	-0.0211499	-0.31027
424	-0.133773	-0.134469	0.123197	0.113939	0.100878	0.322293	0.32798	0.112789	-0.0416742	-0.0794338	0.0238221	0.501968	0.196946	-0.0209476	-0.260145	0.237426	0.273349	0.562168	-0.0920637	0.936802	-0.405546	0.215786	0.619032	-0.194608	-0.288105	-0.182024	-1.27498	-0.17342	1.67041	-0.0900986	0.379602	0.501251	-0.703493	-0.0265421	0.598025	1.64405	0.353624	0.312467	1.38308
425	-0.0878876	-0.243463	0.295536	0.146593	-0.546286	0.0966423	-0.00714734	-2.41163e-05	-0.0341741	-0.124488	0.32912	0.785638	0.160625	-0.235135	-0.37077	0.250108	0.312958	-0.255031	0.259422	0.532317	1.04868	0.191558	-0.0692616	0.108455	-0.285418	-0.104142	-0.473495	-0.130122	1.59718	0.288579	0.881983	-0.0968727	-1.14161	0.487967	0.781317	-0.0451424	-0.380328	-0.0222045	0.310223
426	-0.017367	-0.265626	-0.552623	0.493692	0.224107	-0.377968	-0.0803922	0.136852	-0.265248	-0.282595	0.0266817	-0.0607215	-0.114206	0.417411	-0.419305	-0.0645282	0.0809863	0.0697112	0.816951	0.211121	0.783003	-0.609851	0.0323657	-0.614244	-0.295157	0.328038	0.494675	0.837932	-1.05629	0.543314	0.070744	0.325774	0.982172	0.50305	0.396988	-0.113145	-0.420412	0.292945	-0.339674
427	-0.0744998	0.259727	-0.000119091	0.0893472	0.117271	0.626521	-0.0910711	0.164305	0.00174801	-0.220134	-0.208701	0.305427	-0.279997	-0.0135983	-0.415382	0.416248	0.264234	-0.156525	-0.90849	-0.815546	0.110286	0.247085	0.2884	-0.292029	-0.0263646	0.710367	0.366226	1.11675	0.937865	0.806144	0.477717	-0.690645	0.0752747	-0.0271348	-0.0100296	1.35697	-0.137303	-0.123568	1.08016
428	0.0265091	-0.296396	0.114898	0.195875	-0.268788	-0.61607	-0.227545	0.226779	-0.0792646	-0.318269	0.0686884	0.153144	0.0334516	0.00285597	0.0459257	-0.307729	0.469252	0.212225	-0.288379	0.0398768	-0.183054	0.0358344	-0.385481	-0.427361	-0.311986	1.027	0.149868	0.294832	0.562692	-0.408209	-0.288189	-0.374567	0.326446	-0.12173	1.13161	-0.0650687	-0.575397	0.796831	-0.196321
429	-0.152315	-0.0206782	0.336743	-0.0589444	-0.328361	0.267353	-0.00842444	-0.266268	-0.38077	0.183192	0.106889	0.0441345	0.172449	-0.00550749	0.0243111	-0.0818277	0.501041	-0.0648255	-0.499952	-0.322271	0.165371	0.0653683	-0.186596	-0.655409	-0.726042	-0.32439	-1.18952	0.769316	1.57623	0.804548	0.196619	-0.148952	0.881502	0.120884	-0.348398	-0.514308	-0.450651	0.499991	-0.952595
430	-0.0467633	0.184831	0.0581403	-0.10608	-0.447067	-0.0728231	-0.0976143	-0.126201	0.0684068	-0.823727	-0.044637	0.138473	0.0733706	-0.135177	-0.268534	0.170446	0.270325	-0.0646377	0.370283	-0.741951	0.234634	0.681273	0.191549	-0.417536	-0.973879	-0.0147933	0.821764	1.19647	0.158332	-0.298033	0.418203	0.245697	0.963608	0.0736574	0.468669	0.409698	0.255757	-0.874529	-0.351366
431	-0.213903	-0.117977	-0.00408455	0.40288	-0.112642	0.117786	-0.0608336	-0.0745722	-0.109054	0.00389206	0.00570174	-0.691544	0.0628581	-0.176497	0.401223	0.186233	0.0851221	0.127811	0.263586	1.01212	-0.220039	0.747544	0.160482	-0.37356	-0.702353	-0.176763	-0.768458	0.164357	1.57995	0.032719	0.0349929	0.416187	-0.558337	-0.517253	1.17235	-1.69197	0.0593884	-0.391732	0.192176
432	0.0861972	-0.219613	-0.419267	0.315671	-0.253724	0.477796	0.12936	-0.0421465	0.268413	-0.196669	0.249907	0.111753	0.0454195	-0.21854	0.136303	0.0137831	-0.000905335	0.195612	0.10991	0.167083	0.247768	0.0718849	0.795988	-0.0406435	-1.01842	-0.321285	0.0316381	-0.482095	1.50245	0.114958	-0.0721552	0.210124	-0.17628	0.382554	-1.50143	0.154566	0.172747	0.383163	-0.873907
433	0.164536	-0.419867	0.273441	0.239635	-0.281234	0.387336	0.020833	-0.198384	-0.0131469	-0.0284743	0.411599	0.253426	-0.504979	0.0532657	-0.0592705	-0.00500838	-0.522234	0.0196667	-0.0779803	-0.237755	-0.258929	-0.30924	0.251336	-0.203919	-0.825879	0.914385	-0.403501	0.45033	1.09926	0.270553	0.167441	0.308903	-0.437489	0.215171	-0.498606	-0.894814	-0.120955	0.333889	0.529821
434	-0.0805058	0.118963	0.376511	0.421872	-0.16761	0.309941	-0.0261699	-0.0217385	0.13493	-0.210906	0.0646256	0.235847	0.465477	-0.190532	0.161999	-0.120399	0.349089	-0.239014	0.373608	-0.807374	-1.18056	0.432603	-0.958864	0.0643258	-0.264836	0.560951	-0.302258	0.149156	1.58475	-0.0777214	-0.0251259	0.240824	-0.461207	0.637419	-0.00431738	0.246501	-0.551462	0.58945	0.843231
435	0.0835109	0.190957	-0.0441953	-0.0348556	-0.0347886	0.14747	0.164269	0.00352714	0.255487	0.152622	-0.152928	-0.00152682	-0.0280037	-0.319583	-0.160707	0.398706	-0.263946	-0.340434	-0.692432	0.884483	-0.751091	0.0404285	0.142957	-0.145838	0.00410389	0.133989	0.305698	0.150026	0.122507	0.7096	0.572801	0.484669	0.354792	0.635072	-0.11071	2.21842	0.381343	0.0202441	-0.52815
436	-0.247012	-0.0944114	-0.230585	0.144576	0.0707773	-0.0137598	0.155618	-0.205423	-0.0331972	-0.790607	0.0950939	0.381516	-0.19752	0.0289993	0.319016	-0.1553	0.269461	0.155938	0.340534	0.270614	0.551024	0.0743725	-0.0921261	-0.441222	-0.588743	0.0713934	-0.539582	-0.0655389	-0.763907	-0.508145	0.853883	0.979874	-0.220069	0.558723	2.05603	0.403694	-0.0917786	0.385124	-0.366346
437	0.0565825	-0.0230676	0.0164966	-0.180264	-0.161045	-0.794214	0.00836104	-0.0281777	0.0718037	0.213143	-0.0382364	0.294629	-0.147675	0.136387	-0.298514	-0.137275	0.143496	-0.152385	1.09603	-0.115765	0.179461	-0.125373	0.457181	-0.109435	-0.210173	0.337277	-0.568457	0.524028	0.284921	-0.777619	0.315279	0.519483	0.331361	1.05021	-0.398969	-0.44202	0.366373	-0.311803	-0.397988
438	0.286796	-0.0690462	-0.10044	0.0649681	0.0322715	-0.249629	-0.178677	-0.0941058	0.0414577	-0.0432833	0.0187873	0.105341	0.368608	-0.503489	0.149131	-0.0799324	0.191581	0.217056	0.770405	-0.154627	1.24832	-0.150571	-0.147972	-0.0275285	-0.507594	0.209613	-1.28039	0.164781	-0.475699	-0.268246	0.165817	0.151243	0.397885	1.06481	0.981194	0.390922	-0.313942	0.362603	-0.350229
439	0.0923342	-0.150854	0.16434	-0.134965	-0.0655423	-0.820248	0.013793	0.0451669	0.250092	0.323104	0.0190091	-0.0548624	-0.0764185	-0.245143	0.304646	0.155123	0.08362	0.207294	0.0399326	-1.30375	1.10491	-0.726331	0.416873	-0.0850339	-0.67074	0.495321	-0.187108	-0.0246213	0.90478	0.185542	0.192212	-0.0854064	0.35374	-0.0527977	-0.0479721	-0.471233	1.35039	-0.302931	-0.439814
440	-0.275994	-0.0721874	-0.214108	0.5723	-0.204954	0.23981	-0.0470793	0.314295	-0.0217141	-0.00981317	0.174666	-0.00668657	-0.509699	0.200907	0.343719	-0.0643669	0.0595669	-0.0818206	0.381356	-0.265252	-0.269245	0.410148	0.216521	-0.694028	0.273974	0.21309	0.69315	0.437372	-0.484326	0.324098	-0.154674	-0.0960757	-0.5826	0.275258	0.031978	-0.676137	0.652148	-0.329659	0.622984
441	0.0307024	-0.0504502	-0.0579604	0.604881	0.116323	0.386103	-0.247382	0.415116	0.0922146	0.143198	0.161709	0.564701	0.0873515	0.126381	0.265975	0.097498	0.287115	0.350311	-0.394465	0.681531	-0.881371	-0.435318	0.320764	-0.416067	0.128054	-0.22548	0.143101	0.556064	0.806198	0.00589665	-0.386168	0.0725829	-0.28116	0.441676	-1.69774	0.346498	-1.04983	0.317291	0.483467
442	-0.0633834	-0.0574561	-0.434489	0.464491	-0.091595	-0.220846	0.0784292	-0.0262972	-0.0947608	0.464358	0.056903	-0.307118	0.0977389	0.158838	0.105059	0.00497208	-0.207795	0.128285	-0.536318	-0.189721	0.941554	-0.153141	0.00115294	0.936387	0.246535	0.516943	0.427846	0.170711	1.01539	0.00818379	0.0373852	-0.0345699	-0.364303	0.019255	0.745196	0.29048	0.552207	-0.910433	0.418734
443	0.0188215	-0.367636	0.147642	0.1517	-0.0547143	-0.743525	0.13516	-0.163766	-0.340459	-0.0717944	-0.448706	-0.462472	-0.183439	0.151038	-0.00262881	-0.560002	-0.201828	-0.16171	1.16054	-0.162109	0.425301	0.13093	0.210482	0.22436	-0.442219	-0.560547	-0.038214	-0.461679	-0.651644	0.179052	-0.287379	-0.0712615	-0.277716	-0.30002	-0.347284	0.928072	0.459005	-0.390831	-0.25721
444	-0.0935878	0.286713	-0.382267	-0.298453	0.0350378	0.105258	-0.0317251	-0.332227	-0.0412383	0.0158598	0.248613	0.14457	0.205328	0.301383	-0.400806	0.181213	-0.356352	0.0583874	-0.11366	0.0472177	-1.83646	0.188839	0.39129	-0.116971	-0.18625	0.28857	0.266794	0.675782	-0.588276	-0.38549	0.822713	-0.0840425	-0.164439	-0.0647892	-0.243974	-0.690647	-0.226575	-0.270578	0.43311
445	-0.0417402	0.289489	-0.0350734	-0.206443	0.172645	0.247969	0.0625691	0.153785	0.275944	0.0739146	-0.276929	-0.0848683	0.169178	-0.382762	-0.0931013	0.16849	0.0921384	0.162236	-0.409586	0.177903	-0.377047	-0.223913	-1.47928	0.0834412	-0.188641	0.429625	0.360946	-0.66384	0.836227	-0.227473	1.19062	0.666638	0.293619	0.0943049	0.382967	-0.186091	-0.428111	0.347606	0.0877728
446	-0.116651	0.0280587	0.063683	-0.0597895	-0.18386	0.164844	0.172119	-0.334753	0.192361	-0.294677	0.171497	-0.140634	0.227919	0.0533851	-0.00785862	0.0831221	0.308946	-0.0194276	0.777603	-0.640707	0.362827	0.0426223	0.0567353	0.219269	-0.713472	-0.740714	-0.930359	-0.45392	0.194751	-0.370292	-0.267103	-0.0165228	0.189697	-0.484195	0.944395	0.170943	0.094723	0.656875	0.205987
447	0.262117	-0.208315	0.129246	-0.217626	0.0230971	0.301437	0.0119815	-0.0526976	-0.347523	-0.263256	0.417969	0.0578696	-0.393947	0.141192	0.0163908	-0.0643871	0.118969	-0.246836	0.295294	-0.16968	0.101409	-0.074419	0.402627	-0.562164	0.211429	0.437926	-0.04316	1.29133	-1.28276	0.628955	-0.760785	1.3087	-0.100389	-0.444505	-0.422419	-0.898968	-0.356176	0.0946696	-0.456432
448	-0.0563947	-0.0646032	0.358198	-0.353703	0.234338	0.234073	-0.0751806	0.0423863	0.186634	-0.324023	0.0137337	-0.0693075	0.120613	-0.136347	0.038701	0.205226	-0.310612	-0.164562	0.147807	-0.322664	-0.245227	0.540749	0.185254	-0.26959	-0.242737	-0.415982	-0.685216	0.533272	-0.137207	-0.295402	-0.965599	-0.757685	0.175375	0.159825	0.319487	-0.205071	-0.0287284	-0.190809	-0.434467
449	0.126077	0.397656	0.114284	-0.0298108	-0.115009	-0.3622	0.149301	0.205491	0.0553156	0.146936	0.0515213	0.0339146	-0.235429	0.0241964	0.13395	0.118729	-0.186931	-0.399993	-0.587153	-0.564736	1.50736	-0.290327	-0.155631	0.0747683	0.688443	-0.717966	0.260159	0.123836	0.69911	-0.271288	-0.133294	-0.532416	0.795362	0.533985	-0.563819	1.23752	0.708211	0.0911537	-0.781631
450	-0.0659605	-0.253458	0.096737	-0.0552476	-0.136262	-0.113113	-0.255272	0.0929625	0.0215127	0.109484	-0.396311	0.263345	-0.0953124	-0.437304	-0.055682	-0.234861	0.456351	0.293311	-0.340057	1.14297	0.00164816	0.273979	0.0666008	-0.173434	0.498857	0.987625	0.238103	-1.77155	-0.891792	0.727858	0.749608	-0.551419	-0.266045	0.0444617	0.883189	-0.99274	0.275275	0.255057	0.300668
451	0.0845156	0.299825	0.240666	-0.252634	0.0452723	0.728079	0.330289	0.00796586	0.0985123	0.19673	-0.0499406	0.0881737	0.195834	-0.100493	0.0932483	0.554784	0.0167487	0.0189624	0.994785	-0.423616	0.415235	0.310453	0.243199	-1.10675	0.540074	0.571251	0.774085	1.11608	2.04832	0.653955	-0.109272	-0.0596996	-0.0599147	1.64538	-0.621876	0.659976	0.441386	-0.95547	-0.800906
452	0.610221	0.505822	0.832609	0.487496	0.275453	1.09937	0.350941	0.228771	0.106538	0.308227	0.751766	0.230285	0.225552	0.258812	-0.18506	0.62862	0.369192	0.383564	0.434013	1.43509	-0.0767523	0.975486	0.58972	0.682254	-0.0170975	0.616995	0.137669	0.896679	1.27241	1.16718	0.925593	1.18483	1.3274	1.33815	0.800011	1.00311	0.4238	1.16716	0.692212
453	0.686616	0.3661	0.490445	0.0126946	0.731241	0.0588455	0.243773	0.633281	0.313339	0.545325	0.249563	0.254064	0.663041	0.401274	0.36583	0.952128	0.287835	0.511123	0.180172	1.49266	-0.495151	1.1812	1.00974	0.5934	1.19106	0.523904	0.729845	1.66678	3.01514	0.524193	1.68133	1.47429	1.92263	1.18971	1.339	2.42442	0.680597	0.955222	0.796485
454	0.90746	0.681762	0.639568	0.946593	0.599281	0.83212	0.453159	0.2376	-0.0960684	-0.193589	0.618905	0.21651	0.623254	0.633888	0.311915	-0.265085	0.539806	0.276907	0.44104	-0.00949676	0.568692	0.495039	0.361785	0.39765	1.46868	1.11412	-0.00150759	2.17273	1.00858	1.48127	1.88051	1.07667	1.38537	1.08971	1.87434	2.19178	1.59658	0.788736	0.456106
455	1.61579	0.513981	0.987915	1.03322	0.587218	0.0131276	0.332833	0.650648	0.242141	0.549767	0.504292	0.569251	0.546713	0.962991	0.311879	1.04106	0.360694	0.692847	2.02953	-0.149528	0.566074	1.20388	0.814403	0.130323	1.54413	1.66682	0.0870997	1.94303	3.12661	1.04463	1.86129	1.62528	0.43165	0.734649	1.75023	0.369447	0.483343	1.64201	-0.711426
456	1.2557	0.608387	0.832229	1.64332	1.221	0.962028	0.692014	0.474248	0.176759	0.61714	0.708766	0.667139	0.260039	0.922527	0.632725	1.80301	0.837929	0.581583	1.04273	1.25185	0.406963	1.8452	1.13786	0.799907	1.75521	1.61436	1.68889	1.66928	2.89656	3.02864	2.03917	1.21821	1.78794	0.60185	1.26349	2.01487	-0.0190895	-0.561689	1.39732
457	2.08722	0.247048	1.38271	1.82353	1.16584	1.28743	0.614378	0.591412	0.418159	0.942566	0.887734	0.787763	0.951774	1.02811	0.515182	1.35334	0.966507	1.02743	1.2724	-0.0885055	1.03828	2.07868	1.6515	0.865921	1.84467	1.83632	0.546039	1.56019	3.09926	1.4451	2.49469	0.928865	2.01758	0.741572	1.82637	1.97793	0.176928	1.4947	0.294306
458	2.14534	0.550336	2.16751	2.27159	1.62923	0.21654	0.982701	0.741439	0.445334	0.84475	1.20659	0.968628	0.532786	1.18903	0.359353	1.61991	0.789967	1.0404	2.33587	0.790378	1.2177	1.88233	1.14724	0.927632	1.91504	2.15446	0.631712	2.04551	2.79174	2.83172	1.34033	2.50026	2.20404	1.30223	1.97681	1.41796	1.06328	0.934715	-0.253033
459	2.3707	0.536215	0.290329	2.35516	1.72436	0.883811	0.942945	0.739203	0.591773	0.749973	1.32958	1.01739	0.775203	1.21753	0.62411	1.46732	1.31876	1.03782	1.03256	0.749119	1.90001	1.51778	2.14629	-0.270103	2.60326	3.00191	0.708203	2.67166	2.02865	2.82431	2.23534	2.95281	2.30873	0.893651	-0.286278	2.18114	1.37995	0.954988	0.586667
460	2.64331	0.639061	1.34614	2.06199	1.56117	1.31117	1.03068	1.03898	0.167305	1.29235	1.20989	0.804553	0.98339	1.19275	0.434167	1.90759	0.268144	1.55147	1.37359	1.31697	1.9794	2.56182	2.62208	0.627494	2.40212	3.36421	1.48977	2.19701	3.13895	2.78109	2.91978	1.54761	2.73926	0.946115	0.943276	3.33278	3.04803	1.28688	0.324382
461	2.57209	0.810688	1.94382	2.65476	2.02284	1.20541	1.0409	0.780268	0.300398	0.914878	1.53395	1.39607	1.01717	1.61442	0.718604	2.15468	1.32148	1.27511	2.08503	1.76828	2.19795	2.68181	1.95601	0.500469	3.28162	1.87732	1.1312	3.3817	4.10064	1.02076	3.00691	2.60743	1.68001	-0.0114461	2.90007	1.97611	1.94366	2.00616	1.13909
462	2.26978	0.678515	2.00653	2.56456	2.09979	1.37966	1.34595	0.460141	0.516532	0.869786	1.02248	1.34109	1.16921	1.88367	0.625568	1.94745	0.716532	1.37423	2.30651	1.35677	1.1747	3.10027	2.3678	1.08225	2.392	3.00213	0.312754	2.53748	3.91703	2.64788	2.46189	2.4602	3.30827	1.96907	2.93846	2.53981	1.34902	1.07995	1.61615
463	2.61821	0.489373	2.18873	2.88881	2.30411	1.59899	0.759421	0.80093	0.54306	1.12451	1.23214	1.43473	1.3825	1.72387	0.743839	2.00086	1.31414	1.75297	2.9661	0.438024	1.7468	2.6902	2.55204	1.23647	3.27911	2.87006	0.679322	-0.017004	3.9437	3.65251	4.12752	3.08502	2.87158	1.23887	1.77688	2.73101	2.97392	1.6844	1.99377
464	2.81872	0.99609	2.32317	2.48942	2.02754	1.80769	1.23559	1.1077	0.671643	1.55318	1.75819	1.24559	1.40744	2.2904	0.578361	2.19388	1.96456	1.60153	2.16054	1.22888	1.41873	3.67276	3.21469	2.17896	3.58869	2.5553	1.02852	3.27826	1.13615	3.98353	4.26829	2.48804	3.1431	1.68245	2.39677	2.06225	3.08424	1.17232	1.09609
465	2.53328	1.19099	2.08825	2.64303	2.3804	1.82735	1.48268	1.26592	0.446055	1.28141	1.5215	1.30937	1.64459	1.94817	0.724942	1.89529	1.45946	1.55836	2.21096	0.561968	1.53004	3.31563	2.91882	1.72528	3.66234	2.60858	1.29392	3.33205	4.48903	2.80961	3.59965	3.59248	3.1459	1.69161	3.08524	2.19961	3.38979	0.971302	1.57745
466	2.81357	0.672158	2.00381	2.47957	1.94822	1.78168	1.22553	0.785399	0.608982	1.60777	2.06557	1.87251	1.07992	2.05764	0.833501	2.201	1.64092	1.93603	2.57649	1.46568	1.28771	4.16911	2.53059	1.49611	3.19928	2.5716	1.68507	3.26577	4.21937	2.58746	3.73378	3.50562	2.45471	1.83453	1.38685	2.30828	2.19096	1.94405	0.983898
467	3.23272	0.450859	2.14349	2.55725	2.17453	2.00223	1.39016	1.1589	0.151434	1.46137	1.49223	1.65972	0.982997	1.70685	0.92652	2.5066	1.43024	2.44365	2.88467	-0.0428655	1.50609	3.42557	3.08617	1.77572	3.97878	2.61453	0.940726	1.93921	4.30782	3.70708	3.84431	3.14584	2.9167	1.60732	2.72646	1.68001	4.44678	1.42987	1.37609
468	2.90648	0.957236	1.97823	2.83925	2.63879	0.89495	1.463	1.09494	0.343564	1.4595	1.99612	1.55278	1.33203	2.3987	0.968128	2.27066	1.54076	2.43795	1.98644	1.82967	2.95328	4.81307	3.13962	1.75965	3.74461	3.84001	1.62609	3.44607	3.51394	3.03558	3.48017	2.78678	2.61468	0.607386	2.69753	1.09786	3.58744	2.43346	1.95051
469	2.85721	0.877296	3.20555	3.01178	2.59964	2.20017	1.52533	1.33205	0.847286	1.45568	2.21731	2.03018	1.11047	1.92799	1.46844	2.54384	1.84098	2.03659	1.98183	1.10175	3.82012	4.52668	3.67656	1.68769	2.81754	4.24898	2.14093	2.97267	4.11028	3.34794	4.44109	3.56224	3.33243	1.04723	3.18031	1.60084	4.2396	1.79621	2.75695
470	3.00596	1.07894	2.70111	3.27551	2.40438	0.993532	1.51372	1.48657	0.748086	1.54546	2.43989	1.93429	1.1842	1.98471	0.935744	2.5235	1.82623	2.14341	2.52417	1.05504	2.9281	4.74343	3.41453	1.80211	3.35762	3.89738	1.47377	3.97486	4.3751	2.66746	4.09939	2.59869	3.56603	1.9587	2.53355	2.12635	3.96674	2.75136	1.78538
471	3.14809	0.907672	3.10384	2.77793	2.64076	2.42864	1.7924	1.1994	0.836539	1.61854	2.34493	1.88728	1.6385	2.20863	1.05522	2.49541	1.85036	2.02203	2.67849	0.984047	3.02295	4.45204	4.03393	1.82106	4.08543	2.30172	1.15793	4.82966	5.51762	2.73309	4.19662	3.89146	3.11592	0.887479	2.85718	3.0452	3.58006	2.04562	2.13498
472	2.85555	1.09073	2.78825	3.04539	2.51244	2.2308	1.76199	1.13968	0.622284	1.44349	2.11269	1.89487	1.3595	2.2152	1.28008	2.66155	2.03571	2.09859	3.64964	1.29498	1.64087	4.65951	3.68657	1.86494	4.17122	3.25802	1.49373	3.48067	3.40332	3.8138	3.76928	4.07563	3.3733	1.43767	2.96033	2.32412	2.99951	1.58642	3.23984
473	3.50281	0.6226	2.38058	2.80566	2.46111	2.06024	1.62731	1.20253	0.66751	1.31614	1.91576	2.16699	1.94373	2.54279	1.27748	2.50124	1.92106	2.19163	2.97886	2.431	1.97454	5.0135	3.61257	1.86807	3.48334	2.94227	1.25274	4.4214	5.6158	3.53835	4.55798	3.74088	2.92611	0.37705	3.75912	2.02989	2.82779	1.05498	2.8418
474	3.49554	0.868496	3.18155	2.9689	2.60458	2.55257	1.33291	1.50209	0.87431	1.21866	2.27833	2.04874	1.24956	2.09212	1.52478	3.14664	1.69936	1.38088	2.86459	1.63685	2.81268	4.72415	3.84744	1.18064	3.90428	3.46421	1.9437	3.56947	3.53062	3.3654	3.72501	3.43916	2.94936	2.05273	2.02611	1.72579	3.37952	2.78678	2.2733
475	3.74576	0.677191	2.80211	3.14206	3.04043	2.37804	1.69318	1.33123	0.945282	1.67764	2.44618	2.16795	1.59293	2.31198	1.2671	2.74472	2.12925	2.35852	3.32492	1.94257	3.2734	4.40489	3.75296	1.85631	4.20814	3.41183	1.83617	3.75321	5.08606	3.94187	4.9595	3.65394	3.5888	2.41027	2.59945	2.00019	2.76536	1.89542	0.569663
476	3.2691	1.14439	1.856	3.46589	2.75731	2.36296	1.68463	1.58288	0.661407	1.65435	2.51397	1.53793	1.12452	2.32684	1.29939	2.89176	1.76777	2.03868	3.58103	-0.308186	1.05304	4.88306	4.11723	2.00435	4.77197	3.56615	1.36933	3.8152	5.3536	4.61114	4.68329	3.84631	2.47702	1.35381	2.30575	2.18712	3.95251	2.20193	1.94193
477	3.73388	0.778684	2.84442	2.98342	2.86267	2.3688	1.56217	1.15134	0.91898	1.55705	1.98033	2.14544	1.46548	2.3653	1.29372	2.79672	1.83203	1.97172	4.04971	1.93661	1.91902	4.86144	3.67059	1.68986	3.62009	4.27771	2.15419	3.73992	5.13727	3.38385	5.10384	4.2134	3.43596	1.56944	3.27379	2.44263	4.08355	1.88545	2.83738
478	3.38103	1.14618	3.04413	3.30522	3.00544	2.13453	1.53987	1.46585	0.598145	1.50732	2.25732	2.26045	1.42459	2.47117	1.20119	3.00266	2.02667	1.95154	5.01814	1.77251	1.41494	4.63533	3.57726	2.5889	4.09002	3.33863	0.96738	4.10813	4.8086	4.10073	5.6196	3.52151	3.15147	1.85585	2.25662	2.60091	3.4744	2.65132	2.9258
479	3.18932	1.05023	2.90444	3.12418	3.02476	2.30995	1.69211	1.37961	0.915568	1.54752	2.2498	2.48966	1.73773	2.37367	1.2207	2.57985	1.70995	2.2673	4.92021	1.95951	2.68629	4.65237	4.22208	2.23588	3.97179	4.61384	1.52641	3.73431	5.31986	4.91161	4.95649	3.24174	3.24219	2.49977	4.04579	2.83344	2.63787	2.98315	2.97653
480	3.16834	1.16435	3.10229	3.10377	2.75073	1.49619	1.79162	1.50224	0.847962	1.60378	1.93319	2.18892	1.40468	2.31166	1.47449	3.02341	1.67573	2.39092	5.49789	1.92091	3.59313	5.10602	4.05094	1.89435	3.54421	3.6687	1.43061	4.58207	5.99724	3.92808	4.60793	2.78697	3.32492	2.34676	3.53352	2.26008	3.64427	2.12577	3.52065
481	3.88603	0.968458	3.45294	3.51262	3.16851	2.72584	1.78813	1.57929	0.843799	1.46426	2.22958	1.91387	1.49782	2.49483	1.44827	2.99923	1.76199	1.98759	4.21961	2.48981	3.80065	3.95511	3.82398	2.24302	3.62668	5.19066	1.82122	4.6176	5.36181	4.51526	4.60527	2.60442	4.37401	0.582125	3.64352	1.99217	4.23178	3.2906	3.0651
482	3.67821	1.03091	3.00687	3.10089	2.79718	2.47927	1.71914	1.17651	0.730937	1.30505	2.27969	2.02422	-0.550505	2.60081	1.12176	3.3775	1.73234	2.18368	4.53611	1.8938	1.67775	4.37598	4.06719	1.82066	4.62986	4.33914	0.862194	3.17528	5.15324	4.8942	4.89591	3.91498	3.549	1.09092	2.85431	3.56179	4.18024	3.05502	1.73306
483	4.0316	1.14096	2.92537	3.13847	2.47175	2.55799	1.81395	1.63454	0.508656	1.33773	2.23914	1.99477	1.59453	2.26672	0.820573	3.1661	1.56386	2.57975	5.14521	1.92014	2.30591	4.88077	4.09224	1.57264	4.433	4.12217	1.68823	4.64223	5.51898	2.4472	4.40916	4.19721	4.01385	1.17287	3.64098	3.62313	3.34726	2.62907	1.74644
484	3.53926	1.06674	2.92715	3.51646	2.77324	2.41528	1.3231	1.6235	0.714314	1.29506	2.15074	1.77288	1.45155	2.69849	1.46722	3.35546	1.91048	2.57524	5.32537	0.462778	2.08247	5.21446	3.6511	1.97378	4.68737	4.42203	1.61844	4.54098	5.83797	4.22754	5.51215	3.25637	4.11932	2.61083	3.48908	2.80959	4.15037	1.7625	2.17471
485	4.06562	1.12612	3.51452	3.11048	2.93972	2.84764	1.63848	1.53185	0.323138	1.55411	2.18061	1.93125	1.50201	2.67966	1.9125	3.36232	1.68215	2.17972	5.16104	1.58872	3.01554	4.80395	4.039	1.79152	4.88583	4.97187	1.0236	5.10338	5.3539	4.12104	6.59052	3.89623	4.68464	2.35773	3.51712	2.58576	4.8286	3.59146	2.37021
486	3.775	1.29681	2.89734	3.26952	3.1427	2.55727	1.85558	1.77289	0.944967	1.72811	2.37366	1.94127	1.51145	2.34352	1.41739	2.94665	1.57625	1.75609	5.0166	1.46646	2.56693	4.89506	4.12342	1.31679	4.19255	4.92814	1.99874	3.44609	5.32392	3.41703	5.54668	3.82485	4.34607	1.41985	4.06079	2.93003	3.86083	2.26156	2.9616
487	3.91194	1.10039	2.7284	3.7556	3.1494	2.77775	1.74483	1.44065	1.00578	1.51767	2.49334	1.91015	1.85241	2.38158	1.18458	3.37897	1.70154	2.0859	6.52847	1.55466	3.07169	4.59502	3.99849	2.73751	3.84795	4.66103	1.73801	4.72701	6.47151	3.49402	5.52244	3.87568	4.43458	2.47625	3.74711	3.1696	3.76868	2.53008	2.76946
488	3.90414	1.42342	2.46445	3.30795	3.07422	2.7838	1.95292	1.74008	1.17784	1.02049	2.84905	2.27804	1.62312	1.74569	1.42157	3.30153	0.257506	2.30889	5.02525	1.58523	3.60358	4.82574	4.46879	1.9211	4.0525	4.95613	2.0138	3.84815	5.74954	3.72092	5.26483	4.42593	4.21287	2.50097	2.96513	3.39803	4.7846	2.41865	2.72624
489	3.827	0.804126	3.28154	3.07768	2.98079	2.92863	1.89715	1.99989	0.899846	1.56666	2.31297	1.83996	1.96877	2.48584	1.21044	3.27195	1.70804	1.93608	6.04291	1.83736	2.39229	4.80407	4.27403	2.63428	5.1772	4.05376	1.23564	3.80138	4.56305	4.09231	6.26532	3.7301	5.11013	1.64081	3.91217	2.86786	3.75554	3.37676	3.56769
490	4.03924	0.644048	3.81782	3.50987	2.74597	2.4127	1.72338	1.7191	1.06531	1.82034	2.38872	1.86812	1.78079	2.23724	1.0215	3.42567	2.6179	2.14489	4.66232	3.24219	4.04461	4.07295	3.33775	2.30397	3.29178	4.79619	2.42027	5.26981	5.69906	5.04178	5.64368	4.37029	4.17379	1.0496	4.52426	3.7978	4.16495	2.85113	4.47613
491	3.70044	0.97875	2.77303	3.63316	2.69937	3.02103	1.68032	1.54403	1.2009	1.51065	2.48621	1.93547	1.27663	2.36559	1.46465	3.1743	1.67203	1.80202	5.47838	3.30915	2.86003	3.62797	4.14702	1.86371	4.05631	4.92998	2.28431	3.2533	6.65483	4.1989	5.60445	3.82203	3.50201	2.48425	3.8207	2.89867	4.78341	2.34405	3.26691
492	3.97623	1.26506	2.96942	3.32736	3.27649	2.7879	1.66091	1.69559	1.06145	1.93529	2.13818	1.80774	2.15347	2.37754	1.35078	3.20406	1.34292	2.3517	4.82978	0.610086	2.65581	4.37715	4.17712	2.75798	4.97295	4.93083	1.42029	4.86207	4.69714	4.71623	6.47815	4.35386	3.16142	1.5822	3.72355	3.39814	4.20433	1.99586	2.30094
493	3.78789	1.00416	3.57231	3.70087	3.04458	3.06335	1.8675	1.65877	1.00034	1.65265	2.19338	1.94202	0.834381	1.96913	1.12419	2.79547	1.61969	2.18529	4.90782	1.90813	3.83606	4.31404	3.87705	2.24488	4.95272	5.52573	1.5231	4.13724	5.87332	4.07626	3.67622	4.58273	3.70038	3.13146	4.96085	2.98954	4.18053	2.87838	4.00564
494	3.93316	1.22251	3.28602	3.51488	3.01729	1.83137	1.72012	1.75067	1.06584	1.83592	2.39424	1.8047	1.89884	1.90428	1.43584	3.00129	2.0263	1.95482	4.22478	1.74395	2.96801	3.83454	4.23059	1.83923	4.41726	5.80662	1.55531	3.02836	6.80562	3.95534	4.70865	3.10921	3.50139	1.00751	5.59792	4.21222	3.27958	2.79797	1.65246
495	3.75185	0.819213	3.08321	3.22536	2.74219	2.50429	1.63788	1.67381	0.983745	1.42977	2.23899	1.94463	1.52761	2.66645	1.47641	3.68681	1.7352	2.46619	6.06013	2.45363	2.8361	4.32857	4.1129	2.46394	5.68297	5.20473	2.28673	4.56646	6.07207	3.9499	5.49201	4.95713	5.32606	2.78781	4.8652	2.44863	4.86237	2.73361	2.34342
496	3.83849	1.19956	3.21738	3.75374	3.11029	2.8196	1.86221	1.71701	0.848533	1.78013	2.31331	2.53588	1.53989	2.48896	1.4714	3.2933	1.89816	2.47122	5.28891	2.56791	3.19296	4.29867	4.12614	2.08572	4.29071	4.97342	2.06743	4.38866	6.58353	4.92235	6.56733	4.02767	4.0464	1.58832	4.15384	2.31767	4.16535	2.80651	1.89292
497	3.54536	0.410826	2.39914	3.75993	2.63999	2.84183	1.64082	1.82389	0.84691	1.77081	2.45602	2.08891	1.6224	2.26134	1.20566	3.24108	1.98013	2.01828	4.03912	2.79529	3.6243	4.39302	4.97741	2.491	4.19808	5.82754	1.86999	4.13109	5.75221	3.85837	6.43119	4.83944	5.05401	2.51155	4.6128	4.68567	3.96872	2.80555	3.26006
498	4.03452	1.35148	2.87598	4.05276	2.71606	2.69787	2.30147	2.12151	0.970924	1.08242	1.99175	2.23602	2.18527	2.39941	1.15805	2.89434	1.67997	2.34177	6.0256	2.41425	3.00641	4.43572	4.23439	1.49954	4.34803	4.06038	1.87834	3.21789	6.22361	5.02484	5.71073	4.68652	3.18851	2.51136	3.03749	2.65317	4.41248	2.39039	3.18641
499	4.42338	0.96993	2.79396	3.74637	2.60709	2.9197	1.95106	1.72177	0.633391	1.13073	1.9245	2.12139	1.72475	2.20321	1.27308	3.45384	1.86242	2.37388	5.53306	1.39368	2.33411	4.00844	3.75275	2.63995	4.18026	5.46024	1.68418	5.45183	6.00305	4.96715	6.33931	4.4571	5.20032	2.87603	3.86392	3.3805	5.59286	2.62536	2.37619
500	4.15761	1.12489	3.74062	4.28202	3.17258	2.07691	1.82557	1.44239	0.80971	1.46888	1.81303	2.05228	1.937	2.54674	1.57311	3.06496	1.97604	2.33025	5.37191	2.39445	4.42375	4.13971	4.34582	2.15806	4.55555	5.9101	1.72015	4.55092	5.02233	5.50999	6.55165	3.02101	4.43094	1.37203	4.72602	3.95529	4.08037	3.23777	3.78912
501	3.82047	1.47601	3.4827	3.7056	2.78796	2.72355	1.69799	1.82054	1.01295	1.75498	1.96439	2.45011	1.92862	2.15025	1.19599	3.05825	1.6209	2.41904	5.75309	2.88502	2.46459	4.19426	4.42223	2.19743	4.84746	5.52114	1.45224	4.61532	6.67552	4.42721	6.32099	4.55136	4.96391	1.05908	3.96173	3.41351	4.03112	2.16477	4.22522
502	3.93788	1.10981	3.48954	3.97318	2.84128	3.40236	2.26758	1.6107	1.21252	1.80904	2.50648	2.04586	1.59867	2.24516	1.51081	3.33609	2.17916	2.20903	4.74955	2.86597	4.01733	4.62658	4.6266	1.5058	4.06055	5.19382	1.22513	4.62902	6.65362	4.87934	5.86302	4.26669	4.28991	1.57842	2.45219	2.9798	3.72556	3.47262	3.62241
503	3.88051	1.17424	3.64403	3.95919	2.77758	2.70166	1.58409	1.72123	1.23427	1.5426	1.94055	1.67536	1.87365	2.62656	1.44864	3.27066	2.13066	2.11272	4.98501	2.66362	1.64366	4.58477	3.84219	2.00806	3.92373	5.28821	1.38258	4.53946	5.84258	4.87151	5.61445	4.22618	4.81035	1.52534	5.36954	4.24014	3.69827	3.99205	3.06795
504	4.0969	1.10274	3.19502	3.97596	2.94599	2.24785	1.64313	1.63253	1.07008	-13.1883	2.11431	1.82749	1.73257	2.42107	1.42353	3.11563	1.47802	2.56341	4.57297	0.528777	3.15114	4.66413	3.7397	1.98094	4.82168	4.08113	1.76654	5.26546	6.70413	4.01626	6.7715	4.71367	4.94182	2.27558	3.07873	4.02804	4.40982	2.28613	3.05421
505	4.05354	1.35265	3.6883	3.7029	3.01696	3.25614	1.91894	2.02054	1.15847	1.29133	2.01431	1.95339	1.45012	2.43618	1.67611	3.25225	1.9774	2.18695	5.00688	1.89454	3.34117	5.27814	4.18614	2.14148	4.47373	4.85718	0.966242	5.00617	3.82667	4.41737	6.54078	4.58638	4.98369	2.57021	4.33985	3.7784	5.06126	2.30376	2.51022
506	3.97254	1.48141	2.72553	4.02624	2.76025	1.69406	1.8453	1.83214	1.03879	1.37803	2.23889	1.72349	1.5967	2.21099	1.27913	3.53057	2.13959	1.5009	5.48328	3.66807	2.43162	4.52752	4.00967	2.07811	5.69912	4.83294	1.37555	4.96923	6.57076	3.27973	6.18318	5.19881	4.80237	2.61302	4.1757	3.82865	5.14594	2.6351	2.80839
507	4.27345	1.20449	3.64358	3.66417	2.96428	3.30557	1.90127	1.7591	0.893323	2.1079	2.28802	2.17814	1.67766	2.56191	1.65522	3.07901	1.92873	2.04285	4.27075	2.86127	3.615	4.26196	3.92114	1.69888	5.33314	4.90097	1.62532	4.70077	6.03604	4.53401	7.39439	5.23858	5.19244	1.69062	4.81271	3.2077	4.13195	2.25294	4.32225
508	4.19323	0.675894	3.41745	4.03216	3.05651	2.91223	2.15806	1.68563	1.09924	1.50822	2.43115	1.87172	2.33736	2.38911	1.32454	3.2712	1.86616	2.64573	4.87222	1.78442	3.58322	4.5332	3.74264	1.94704	4.50785	6.21915	1.21595	3.47035	6.16511	4.78353	7.42235	4.27671	5.06028	1.79315	3.41403	3.62446	4.06213	3.17314	2.26831
509	4.79217	1.27719	2.00082	4.32284	3.08976	3.21023	2.31031	1.7248	1.07187	2.40136	1.96753	1.62798	1.77513	2.18991	1.28851	3.23675	2.08931	2.54089	4.85422	3.88346	3.58272	3.911	3.57919	2.27641	5.42678	5.05022	1.25442	3.68957	5.77915	4.22386	6.3421	5.0492	5.18691	0.833978	5.47154	4.00334	4.24116	3.52052	2.10981
510	3.98136	1.20721	3.82678	3.97607	2.45298	3.08977	2.13924	1.67989	1.24531	1.87116	1.99761	1.84865	1.70725	2.59888	1.7776	3.22549	1.76419	2.31644	5.47541	2.23255	3.05234	3.62944	4.33564	2.49558	4.50758	5.07892	1.63651	6.22061	6.08108	3.55866	7.02047	4.8998	5.5114	2.07683	4.63642	2.93383	5.01595	3.08255	2.56894
511	4.57038	1.66755	3.60575	3.92862	3.07546	3.25779	2.00463	1.88609	0.773878	1.2344	2.12008	1.51118	1.40465	1.66354	1.7907	3.26503	1.79392	2.06643	4.89943	3.0983	2.95659	3.53093	3.62653	2.29302	4.8443	4.57225	1.49252	4.85791	6.81751	3.4326	5.7182	4.9123	4.93753	3.4237	4.68556	3.9682	4.30941	3.4075	3.15074
512	4.43364	0.872528	3.51829	3.59744	3.0306	3.44843	2.41363	1.83827	1.18901	2.05966	2.58915	1.45027	1.8967	2.89438	1.34525	3.37827	2.05721	2.55725	5.07822	3.94527	2.40779	5.02469	4.15994	2.61512	5.46391	5.28808	2.29559	5.17675	5.67088	4.39738	6.4312	4.1647	6.02078	2.30933	4.80768	3.87302	3.36923	2.57882	2.9911
513	4.13094	0.704826	3.11227	3.87845	2.66813	3.2478	2.44831	1.82354	1.40166	1.9083	2.06148	1.65965	2.07955	2.26868	1.30997	3.32471	1.92785	2.4697	5.64972	3.21454	2.36388	4.35819	4.39451	1.83238	4.91178	4.01938	2.28146	5.37202	6.54398	4.60417	7.51895	5.0836	4.50284	2.6298	5.43391	3.63196	5.00857	2.34669	2.70877
514	3.92104	1.34106	3.45217	3.48751	2.46881	2.79648	1.99451	1.77744	1.258	1.78174	2.25556	1.94601	1.68502	2.75193	1.37056	3.32223	1.87324	2.36396	4.88531	3.30572	3.91328	3.74209	3.40318	2.34112	4.67963	4.91534	2.40033	4.08417	6.44276	4.40793	7.64235	5.21401	4.68982	2.8015	4.12244	2.84709	4.43045	3.12041	2.72985
515	4.47433	1.28598	3.71537	3.93831	3.0089	2.59052	2.20934	1.8066	1.12945	2.20894	2.24906	2.02576	1.63597	2.83047	1.61685	3.2186	1.92927	2.23435	6.26714	2.96844	2.43872	4.2251	4.00611	1.77829	4.66002	4.50196	1.87115	5.69487	7.30209	4.82361	6.67707	4.61272	5.41347	3.17976	4.63573	3.38432	3.99051	3.2453	2.73237
516	4.63389	1.04091	3.65475	3.9645	2.83166	2.68934	2.14577	1.85118	0.708196	2.13676	2.3328	1.50207	1.96646	2.49648	1.44007	3.39869	2.07445	2.24671	4.97483	2.9505	2.05814	3.33843	4.08627	2.63331	4.55398	4.76482	1.75393	5.63658	3.49623	4.21087	7.03961	5.02837	5.383	2.48981	4.62293	4.34071	4.31803	1.96653	2.70283
517	4.26926	0.899129	3.99066	3.99988	2.67936	3.41849	2.0303	1.70294	0.982317	1.98637	1.77669	1.5289	1.65975	2.53222	1.52047	1.93021	1.64573	2.57268	6.01763	3.00521	2.05046	3.90013	4.37838	2.43115	5.10733	4.16801	1.49174	5.14824	6.83612	4.8636	8.14209	4.99728	4.50423	3.02906	5.43307	2.57657	4.64097	2.95375	2.91707
518	4.18594	1.26907	3.5599	3.673	3.07123	0.542521	1.92125	1.9386	1.07412	2.02309	2.04075	1.74931	2.09781	2.371	1.50952	3.03254	2.03277	2.28671	5.27877	3.05337	3.30484	3.6723	3.95137	2.29583	4.95044	5.14425	1.27396	5.73006	6.81907	4.12755	7.39106	4.9513	4.37762	2.57488	4.73588	3.19696	4.10248	2.75339	2.64965
519	3.84716	1.05883	3.72024	3.98621	2.58045	3.40036	2.0935	1.71953	1.07466	1.78596	1.4799	1.45008	1.84691	2.72298	1.63253	3.35734	1.81133	1.98976	5.64394	2.21308	2.91258	5.07363	3.97712	2.19174	3.95202	3.79503	1.12761	5.18235	4.69914	5.00307	7.4786	5.11542	5.69071	3.17353	5.70254	3.1515	3.94476	3.50906	2.20992
520	4.90396	1.05894	3.15491	3.42741	3.05286	2.55452	1.83634	2.19863	1.34512	2.04276	2.38812	1.35462	1.70997	2.14198	1.4896	3.40845	1.75129	2.52174	5.41459	1.01718	4.43589	4.58664	4.35874	2.14151	5.85	4.29404	1.57784	6.75904	7.10852	4.36444	7.30224	5.79768	5.80357	2.49531	4.99222	3.3254	3.74359	2.69961	3.29868
521	4.79319	0.960621	3.3786	3.94816	2.70292	2.24065	1.81754	1.86224	0.922737	2.16632	2.27861	2.05809	1.76888	2.24015	1.61949	2.95251	2.06305	2.56436	4.89498	3.67954	4.11359	4.34694	3.83291	1.03355	5.29277	3.85142	1.41283	4.54384	6.69583	3.78847	7.23697	4.85222	5.50195	2.52845	4.72385	3.11316	3.61082	2.80724	3.69217
522	4.78035	1.16342	3.74383	3.66714	2.31465	3.13633	1.73933	1.96613	1.13819	2.17506	1.83892	1.68579	2.09772	2.43502	1.52356	3.41063	1.66419	2.61118	6.46767	2.57307	2.23898	4.02793	3.80475	2.69332	5.33093	4.41117	0.915838	5.18356	6.51337	5.01203	6.41934	5.0093	5.33803	3.0815	4.49109	4.62024	3.73529	2.60255	3.16529
523	4.74003	1.07372	3.97801	3.70137	2.87916	2.80821	1.81898	2.10376	1.06522	2.09047	1.99695	1.80367	1.89184	2.42497	1.91596	3.05748	1.74135	2.41106	6.02055	1.18826	2.64812	4.45298	3.72818	1.99433	4.74248	4.52471	2.18135	5.31537	6.1957	4.69619	6.49469	4.69835	5.28758	1.79068	4.69204	3.35393	3.83821	3.01621	3.81661
524	4.52061	0.97933	3.93702	3.79651	3.15214	3.33036	2.14299	1.88705	1.05	2.17791	2.68599	1.84763	1.65437	2.47468	1.30523	3.14976	1.62489	2.26279	5.77133	3.62071	2.42123	4.15165	3.65924	2.32784	5.92099	4.38545	1.73117	4.78347	7.53963	5.35122	6.87742	5.73822	6.06782	2.97762	4.86236	3.80674	3.37525	2.26696	2.47483
525	4.77035	1.27983	3.71055	3.84875	2.49356	2.96364	2.29687	1.93808	1.14972	1.98254	2.38174	1.84003	2.10592	2.52922	1.60296	3.07226	2.05231	2.55697	5.2036	3.79221	5.30553	4.13426	4.23111	2.34301	5.00828	3.28896	1.74859	5.28435	6.67655	4.72815	6.99166	5.33299	4.81454	2.19605	4.51406	3.52892	3.54532	2.56401	2.972
526	4.81018	0.511157	3.7682	3.98514	2.93873	2.56743	2.00314	1.77607	0.876504	2.04153	1.78203	1.84666	1.8202	1.91532	1.80324	2.85285	1.53479	2.21032	6.24267	3.52933	3.44392	4.48912	3.72907	1.55512	5.01386	4.54496	2.13657	4.31698	6.5136	4.3022	7.47236	5.30348	4.21907	2.49028	4.27704	3.51987	4.12007	2.12367	3.15448
527	4.58938	1.05836	3.79762	3.90657	2.98697	2.64219	2.09384	1.85826	1.03549	2.02962	2.31994	1.51686	1.44456	2.43446	1.96594	2.41994	1.84341	2.13728	5.02479	3.48394	3.5415	4.14912	3.66008	2.48575	4.97465	4.10493	1.99162	5.41826	6.40252	2.91891	7.27153	4.34481	4.10813	0.444901	3.81822	3.66755	3.85484	2.91128	3.71456
528	4.36511	0.479169	3.83872	3.76255	2.31077	2.61686	2.06114	1.95674	0.813513	1.9283	2.33919	1.4934	1.55329	2.27778	1.00054	2.95235	1.79542	2.26019	4.95554	3.37545	2.90564	4.61283	3.63067	1.63875	4.51298	2.95267	1.49835	5.49122	6.26937	4.84025	6.31893	4.93126	4.49896	2.58576	3.46383	3.36309	2.83917	1.65737	2.12888
529	4.64125	0.648253	3.22164	3.79692	2.9297	2.86726	1.97547	2.06257	1.46137	1.03549	2.05132	1.59726	1.87851	2.26807	1.30422	1.98401	1.45586	1.88385	4.06176	3.07117	3.22549	3.41865	3.54507	1.76437	3.90633	3.6244	2.31796	4.00744	6.03831	4.65624	6.34359	4.8273	4.33431	1.08086	3.89201	3.38233	3.71765	1.93401	2.43266
530	4.54675	1.06531	3.21221	3.7627	2.60638	2.60839	1.94824	1.80428	0.638967	1.60682	2.08898	1.3437	1.10279	2.39993	1.37487	2.1043	1.56954	1.97032	4.36049	2.63358	3.27869	3.64965	4.06711	1.65163	4.22616	3.84248	1.38888	5.4286	5.62327	3.92173	6.3039	4.53454	5.07531	2.22548	3.277	2.98928	3.6906	2.11372	1.48848
531	4.34611	0.634665	3.00848	3.46501	2.27999	2.5458	1.79228	1.902	0.869966	1.92119	2.05101	1.06166	1.22223	2.34977	0.842247	2.43639	1.90579	1.5754	4.25129	2.26838	3.40085	3.54728	3.21342	1.1016	3.26775	3.28432	1.27044	4.39646	5.67034	4.25812	5.04895	4.33265	5.39389	2.7078	3.83435	4.07164	1.47888	2.62893	2.59072
532	3.88765	0.718638	2.92782	3.80249	2.41294	1.87215	1.6317	1.94934	1.02745	1.50244	2.16678	1.02404	0.937196	2.09636	1.47991	2.19321	1.33704	1.74735	4.49707	1.96137	2.44245	3.28065	2.69534	1.82525	3.92279	3.1682	1.06719	4.43863	6.4799	3.33416	5.46499	4.0475	3.16246	2.64066	3.96243	2.5039	2.989	2.40159	1.58006
533	3.88044	0.865932	2.80266	3.3003	2.67525	2.47043	1.65665	1.82931	1.04035	1.7819	2.14236	1.03248	1.16204	2.07703	1.60213	2.54961	1.61884	1.74565	4.51539	3.49906	2.67483	3.5656	3.83488	1.68746	4.86585	3.40225	2.34094	4.19696	6.09157	3.53334	5.15692	4.42761	3.64383	0.9554	3.8879	3.14385	3.27341	1.73846	2.8626
534	3.86417	1.0063	2.85504	3.41536	2.88244	2.5232	1.90473	2.12157	0.775051	1.65023	1.68908	1.5226	1.76753	1.88983	0.947432	2.34054	1.51648	1.60929	4.71403	1.50345	2.38237	3.10952	2.69346	1.63747	3.84826	3.0769	1.30765	4.32155	5.32968	2.74968	5.49195	2.9966	3.31253	1.07142	4.81944	3.40921	3.27944	1.94658	1.76835
535	4.04651	0.665867	2.81241	3.32762	2.54754	3.07391	1.86122	1.40879	0.956284	1.38971	1.83227	1.02414	0.969953	2.19193	1.40844	2.22495	1.75701	1.8624	4.83029	3.56687	1.63649	3.38734	2.90965	1.68853	3.93133	2.5558	0.997119	4.32503	5.62389	3.51389	5.92036	3.5039	4.36196	1.22246	4.1107	1.92935	1.71484	1.82596	2.2129
536	3.90877	0.500068	3.51911	3.5117	2.43759	2.68292	1.92043	1.61845	0.494302	1.22672	1.31638	0.95415	0.810309	2.01098	0.885842	2.54388	1.54261	1.68195	3.28451	2.58777	2.26444	3.01114	2.22012	2.03552	3.17221	2.13392	1.56717	4.00988	4.84761	2.96983	5.12125	2.93013	3.33155	1.61679	3.27228	2.46528	2.94047	1.71355	1.73913
537	4.0623	0.896104	3.09409	2.86615	2.53206	2.58705	1.78961	1.71824	1.02168	1.50298	1.78725	0.999176	0.450559	1.76559	1.14231	1.71695	1.23008	1.5631	4.8297	0.902514	2.07898	2.84969	2.52436	1.931	3.03368	2.44876	1.6605	4.76062	5.00788	2.77079	5.03982	2.547	3.85383	1.42371	4.57145	2.85671	2.52723	1.83188	2.43926
538	3.9894	0.53724	2.64832	2.93291	2.56622	2.3962	1.63842	1.42693	0.750491	1.50596	1.69817	1.20164	1.09531	1.64817	1.28092	1.71895	1.12473	2.02762	4.66841	2.09843	2.14352	2.59585	2.85758	1.26222	3.47422	2.97031	1.59323	3.31724	3.96933	3.95385	5.14796	3.87902	3.12553	1.83351	3.73505	3.11222	2.83855	1.39439	3.04074
539	3.66091	0.50801	2.32812	3.0652	2.01024	2.47969	1.73498	1.71937	0.995754	1.12783	1.46087	1.14106	1.16482	1.82358	0.861219	1.40835	1.07177	1.79082	3.73581	2.47464	2.8088	2.80737	2.89427	1.41	3.64309	3.12273	0.673522	5.54109	5.5674	1.55292	4.55063	3.24532	3.20468	1.01913	2.46738	1.95544	3.03541	1.49608	1.77832
540	3.57176	0.467728	2.38154	3.02605	2.32545	2.18395	1.89696	1.39409	0.934566	1.30068	1.523	0.775398	0.940747	1.82307	1.15066	1.93848	1.03891	1.76734	3.52729	2.76547	2.71146	2.66831	2.82639	0.522123	3.45176	2.67672	1.06455	3.84545	4.70156	2.56431	4.45726	3.86648	4.3879	1.85063	2.59592	3.17835	2.82644	1.73601	1.95541
541	3.54872	0.499567	3.02099	2.90029	1.73472	2.36315	1.57235	1.55072	0.837621	0.958037	1.43107	0.994361	0.963831	1.92393	1.1753	2.19936	1.08566	1.31257	4.52469	2.74199	2.62453	2.95155	2.8979	1.74541	2.91222	1.80367	1.06862	4.35205	4.51778	2.9826	4.622	2.28687	3.39502	1.58274	3.33123	2.97978	2.67059	1.81017	1.35884
542	3.25991	0.978048	2.7381	2.1653	2.15718	1.65904	1.4207	1.6244	0.721197	1.20604	1.34897	0.767565	1.08848	1.53534	0.980225	1.59547	1.16177	1.12988	3.33287	0.181651	2.31987	2.5028	2.7574	1.13756	3.49547	2.81652	2.02302	4.05371	4.42203	2.48608	4.13988	2.62601	3.31747	1.91278	3.73234	2.77537	1.88537	0.695392	1.19899
543	2.59607	0.644329	2.79853	3.26623	2.06524	2.74576	1.66287	1.39789	0.869966	1.11062	1.4454	0.878671	0.735527	1.55404	1.25551	1.7452	0.765502	1.10372	3.07837	1.54632	2.8586	2.84571	2.61487	1.6301	3.70003	1.98211	0.711577	4.26552	4.47668	2.44588	3.6059	2.38619	3.97415	1.16102	3.49798	2.07253	1.53457	2.3568	0.692933
544	3.32781	0.176287	2.98102	2.70968	2.17792	1.93478	1.37003	1.63113	0.812025	0.942353	1.2672	0.674925	1.32658	1.89576	0.816639	1.72566	1.04194	1.30913	2.84712	1.71815	2.5969	2.03055	2.69383	0.330641	2.76544	2.73681	1.76917	4.53155	4.18322	2.28703	4.30268	3.33207	3.43128	1.68126	2.65718	2.19155	2.09351	1.3768	1.64862
545	3.34362	0.58349	2.62585	2.77413	2.23779	2.33597	1.48447	1.39817	0.920107	1.1335	1.34712	0.50256	1.08065	1.37313	0.938224	1.84698	0.807991	1.15916	2.77012	2.48455	1.41109	3.00249	2.86965	1.66183	1.72804	1.73549	0.319809	3.7227	3.84646	2.74327	4.74303	2.30247	2.84783	0.513376	3.13575	2.88743	1.13624	0.479518	2.14881
546	3.54549	-0.044479	2.40235	3.41125	1.76675	2.26582	1.14661	1.45351	0.820201	1.17559	1.41665	0.707725	1.18281	1.41632	0.843018	1.58932	0.676635	1.06874	3.58789	2.52686	1.23141	1.89482	2.53916	0.913646	1.99502	2.75591	1.00985	2.9247	3.75176	2.87278	4.30026	3.13761	3.55998	1.63274	3.51437	2.59334	2.05354	0.965286	0.971768
547	3.52072	0.379527	2.48683	3.12348	1.51639	2.42523	1.06869	1.37063	0.846279	0.204351	1.26668	0.669018	1.02445	1.58397	0.608504	0.883575	0.831591	1.33389	2.95908	1.82059	2.6988	1.85654	2.61915	1.87213	2.72249	1.37533	-0.0259224	4.82606	4.94174	3.04791	3.26968	0.920993	2.45723	1.09245	2.97236	2.22485	1.65425	0.333492	1.39683
548	3.29363	0.609738	1.91663	2.85166	1.78515	1.88681	1.47695	0.927792	0.658687	1.26917	0.681451	0.536456	1.30906	1.08803	0.968713	1.65874	0.583056	1.04144	3.27121	1.63991	1.50072	1.77209	2.41417	0.856785	3.43118	2.60137	0.7356	2.86898	5.0481	2.57289	3.04869	2.74581	2.65491	0.868656	2.44737	1.70271	2.11379	1.69457	0.710292
549	3.21498	0.193181	2.66495	2.72002	1.64068	2.00543	1.46262	1.16563	0.672349	0.411256	0.923122	0.64946	1.07883	1.49568	1.01357	1.46718	1.12379	0.958119	3.28871	1.45067	3.08126	2.37574	2.03081	1.44561	2.57478	1.55409	0.297341	3.70845	4.70796	2.38194	4.05524	1.96063	2.83837	1.53623	3.5347	2.23728	1.70751	0.583015	1.81878
550	2.95267	0.0172352	2.13022	2.62315	1.48034	2.07734	1.56951	1.40558	0.647039	1.09324	1.05881	0.567831	0.576184	1.46992	0.782876	1.49922	0.610607	1.03493	2.87448	0.992402	2.44128	2.01263	2.17159	1.75614	2.80692	1.75615	0.749065	3.09974	3.61437	2.26767	3.62737	1.23472	2.85531	1.21838	2.21284	2.34205	2.34501	2.3387	1.19677
551	3.24777	0.449126	2.04501	2.50148	1.94686	0.383636	0.946747	1.41759	0.651908	1.01822	1.37417	0.510615	0.814618	1.33945	0.686688	1.9284	0.797004	1.23563	2.61184	1.21697	1.73541	2.44439	1.44148	0.792947	1.65444	1.37044	0.342704	3.65044	3.34036	2.37003	3.73284	2.3761	2.39182	-1.90623	4.1061	1.85283	1.35833	0.726434	0.890594
552	3.21557	0.0226287	1.49156	2.72473	1.77811	1.64391	1.14528	1.44583	0.335869	0.850553	1.33793	0.646689	0.378137	1.27479	0.576552	1.25434	0.736408	0.645753	2.25241	1.84627	1.5714	2.10703	1.93108	1.27341	2.32237	2.21506	1.75023	3.59202	4.38545	2.10938	2.92256	2.22921	2.9195	0.454761	2.77555	3.15725	2.32341	1.51995	0.793668
553	2.93928	0.577784	2.02573	2.27338	1.74286	1.78769	1.30502	1.10042	0.350779	1.3403	1.33094	0.393818	0.729273	1.32966	0.330199	1.37096	0.782374	1.00003	3.14145	-0.478028	1.19769	1.7674	2.30713	0.783253	1.69593	2.14172	0.401317	4.04221	3.31865	2.31058	3.03202	2.19608	3.3455	0.904655	2.682	1.38687	0.182351	0.516065	-0.521271
554	3.19963	-0.190411	2.35254	2.80009	1.43123	1.74639	0.901431	1.14239	0.533185	0.427515	0.908161	0.622409	-0.379336	1.2134	0.036857	1.48607	0.390878	0.115761	2.58732	1.20371	2.26378	2.10839	2.46284	0.968263	2.66776	0.856588	0.904151	2.15747	3.41078	1.89629	3.87358	2.36277	2.37189	0.98947	3.43489	2.27916	1.91748	1.4588	0.963591
555	2.89042	0.343211	1.71442	2.70843	2.01895	2.10447	1.32401	1.2167	0.805727	1.06099	1.03117	0.66684	0.329701	1.06343	0.94279	1.41558	0.965046	0.762733	2.62086	2.00777	2.0337	2.26199	1.69396	0.978265	2.27934	2.06668	1.27592	3.40911	3.62001	2.12205	3.22582	2.08378	2.99856	1.23297	-1.32619	0.488938	1.76715	0.608351	0.64296
556	2.40934	0.321964	2.40003	2.5864	1.48583	0.92353	1.01298	0.722796	1.13773	0.884481	1.2719	0.768268	0.765545	1.3567	-0.0249429	1.19724	0.734762	0.743923	2.78667	1.7373	1.83944	2.53756	2.23046	0.807817	2.35987	1.66412	0.892504	4.38984	3.76613	2.02872	3.66663	0.940124	2.11854	-1.31995	3.92141	1.02863	1.53385	0.32729	1.17687
557	2.55697	0.0779826	2.01671	1.80454	1.87213	0.698242	0.983628	1.14122	0.627454	0.601902	1.61495	0.535926	0.768785	1.25134	0.113703	1.10708	0.484519	0.660118	3.11828	-0.684685	-1.29087	2.17577	1.95744	1.68963	2.65046	1.62416	0.428542	2.98579	2.85865	2.01004	2.0142	2.91379	2.30554	0.784549	2.36536	0.67979	1.34524	0.89483	1.1399
558	2.79503	0.49335	1.71493	2.31155	1.61202	1.58955	1.24091	1.07384	0.857536	0.213963	1.18501	0.767781	1.03883	0.94558	0.118634	1.29602	0.513572	0.782545	2.06053	1.8332	0.946683	2.02516	1.66403	1.04824	1.69207	1.55677	-0.221617	3.36181	3.57943	2.17028	2.46339	2.71278	2.83339	0.831668	3.02623	1.7154	1.77736	1.85654	0.94453
559	2.43465	0.193514	1.55115	2.27024	1.25189	1.70475	1.33561	1.14189	0.48079	0.342467	1.32203	0.779381	0.53025	1.04496	0.64764	0.990961	0.562316	0.824625	2.85496	1.33479	1.92204	2.15674	1.59004	0.803495	1.97117	1.66653	0.577155	2.92941	2.82039	2.28697	2.36534	0.845581	2.25436	0.478905	3.80852	0.806223	0.619151	0.917096	-1.18799
560	2.80711	-0.556143	2.21425	2.34426	1.5214	0.150116	1.06752	0.972393	0.414477	1.05509	1.34824	0.581915	0.595074	1.24089	0.324711	0.910069	0.400179	0.731646	1.71803	-0.156837	2.09264	1.71454	1.48711	0.722868	2.65482	1.5719	0.708992	2.91472	2.71403	2.11929	3.17823	1.3565	1.54633	1.50604	1.83075	1.10114	1.03434	1.19849	2.02425
561	2.77273	0.561262	2.25456	2.56764	1.3787	0.319479	1.02962	1.06265	0.355138	0.597753	1.20062	0.322789	0.669863	1.1165	0.477369	0.946643	0.949594	1.20104	1.57943	1.52925	2.25378	1.76864	2.15115	0.860301	1.075	1.81376	0.0248457	3.22228	3.46579	1.92837	1.29807	2.08114	1.6405	1.61769	2.51713	0.682682	1.22821	0.308824	0.844331
562	2.51489	0.345314	2.26521	2.30424	1.16212	0.913455	0.697713	1.19707	0.35879	0.6826	1.45097	-0.142395	0.660441	0.375862	0.280905	1.17815	0.558448	0.268743	0.829272	0.850037	2.07986	1.79345	1.9513	0.648045	2.34507	1.18276	1.08419	3.2805	3.06851	-0.732624	2.03355	2.20069	2.45875	1.37455	2.24255	1.45086	1.35031	1.89926	1.1906
563	2.69786	0.279374	2.28537	2.11109	1.6075	1.82816	1.37212	1.0358	0.158528	0.667741	0.705422	0.436344	0.735298	1.3187	0.100886	0.659529	0.58855	0.952852	2.71775	2.19397	0.774867	2.21598	2.47728	1.30796	1.94229	1.27252	-0.0120178	2.1896	3.5354	0.852245	1.94729	2.12057	2.76336	-0.211523	2.70253	1.33655	1.92484	1.89135	1.0238
564	2.13662	0.116905	1.32388	2.35739	1.28492	1.74272	0.962042	0.893255	0.582529	0.275622	1.23315	0.753307	0.238113	1.07984	0.187154	0.633761	0.228042	-0.080445	2.22645	1.70137	1.91573	2.55525	1.92283	0.708115	1.82227	1.05564	0.225636	1.65899	2.94238	0.613846	2.18376	1.89455	1.83326	0.980686	2.613	1.61885	1.01007	1.16055	0.374159
565	2.72691	-0.748828	1.54759	1.80652	1.37881	1.4853	0.550096	0.999169	0.401656	0.910537	0.720623	-0.488278	0.432502	0.9013	0.27473	0.741086	-0.247938	0.299406	2.50402	-0.184604	2.09184	1.69162	1.80306	0.807795	1.96654	0.61146	0.157172	2.27431	2.65075	1.06475	1.82277	1.60031	1.37002	0.529866	3.24037	1.0672	0.823666	0.698477	0.918548
566	2.34358	0.250014	1.51753	2.13559	1.11468	1.59832	1.03712	0.833688	0.567108	0.693807	1.12313	-0.0231995	0.713655	0.595168	0.0947942	0.67328	0.261395	0.822022	1.64406	1.78226	1.23635	1.49622	1.85013	0.910627	1.77574	0.774269	1.05028	3.13418	2.99049	1.41356	1.36928	1.93616	2.04843	-0.876274	2.64955	1.60842	0.676607	1.05039	0.981904
567	2.43679	-0.0617132	1.1775	2.09347	1.11274	0.304655	0.646872	0.958851	0.547358	0.367778	0.767224	-0.0929786	0.985936	0.451602	0.792095	0.235208	0.573591	0.489592	0.521729	0.721307	1.62706	1.20551	1.77759	0.939546	2.45186	1.37137	0.229496	2.42281	0.871686	1.70235	2.66612	1.69859	2.41724	0.947239	2.74307	1.49019	0.23258	0.538894	-0.398793
568	2.27959	0.0910059	1.84314	1.46827	1.58255	1.74137	1.35044	0.740748	0.445664	0.234253	0.841477	0.494641	0.443744	1.09315	0.368513	0.788488	0.316559	0.864604	1.85947	0.884049	0.865111	1.54367	1.77498	0.668705	2.09328	1.5032	0.307248	2.94869	2.8965	1.2283	1.28389	1.30611	1.42174	-1.95398	1.72893	1.09636	1.99334	0.573935	0.919353
569	2.72754	0.225872	0.963558	1.92638	1.07614	1.35626	1.03959	0.763063	0.224074	0.339131	0.725483	0.415859	0.634492	0.610276	-0.063173	0.668501	0.280777	0.18395	3.29207	1.1733	0.364041	1.88771	1.74001	1.18232	2.40602	0.886192	0.344841	1.64482	0.752235	1.13321	1.78927	0.980814	2.159	-1.5699	2.6073	0.966329	0.967252	-0.401276	-0.31388
570	2.54291	0.186871	1.52968	1.59021	1.37126	1.26269	0.921454	0.603664	0.114084	0.242598	0.883784	-0.00442426	0.622403	1.02136	-0.051092	0.154397	0.298349	0.37732	1.0233	0.80354	0.924781	0.857124	0.952825	0.399951	1.83554	0.680887	0.855562	2.57694	2.13782	1.22541	2.1868	0.533904	0.260706	0.739572	2.04526	1.81867	0.365968	-0.0494636	0.312894
571	2.20142	0.270115	1.92808	2.03682	1.05841	1.53574	0.88071	1.06027	0.472643	0.863074	1.02302	0.00952143	0.833787	1.07063	0.344573	0.527061	0.204626	0.232605	1.92366	-0.944091	0.526516	1.33156	2.02799	0.597428	2.36856	1.7202	0.2135	2.17807	2.78462	0.863183	1.31811	1.61304	0.662499	-1.75184	2.96914	1.79494	0.693072	1.25433	0.00566544
572	2.00556	-0.521028	1.66082	1.64407	1.39251	0.780021	0.992779	0.780156	0.397207	0.444911	1.47739	0.102753	0.348899	0.805426	0.479106	0.760725	-0.152919	0.17337	1.54065	0.707951	1.21463	2.0854	2.24361	0.327463	2.80602	1.38871	0.736757	2.36683	2.98225	0.118035	2.0668	1.33276	0.717927	-0.467054	2.73246	1.57324	1.42845	0.918475	-0.533896
573	2.11024	0.130439	1.63676	1.64633	1.04835	1.71229	0.848134	0.776092	0.358594	0.511957	1.0729	0.250927	0.759845	0.600635	0.488739	0.415038	0.21656	0.318356	1.09673	1.44317	1.46134	1.65937	0.774187	0.197045	1.87385	0.112992	1.10032	2.18152	2.76344	1.466	1.52786	1.13119	2.15027	0.967955	2.22854	0.943031	1.90016	0.110798	0.637164
574	1.80086	-0.403629	1.51881	1.33946	0.8875	0.217674	0.756033	0.779758	0.633421	-0.0800336	0.910783	0.255122	0.384688	0.673071	0.489553	-0.0464222	0.172281	0.531897	0.690245	1.16624	0.973869	1.25076	2.1892	0.321548	2.09085	0.768344	0.233627	2.04827	2.34933	0.14167	2.06752	1.59956	1.19563	0.686459	1.50407	0.11355	1.20282	0.488371	0.929303
575	2.24995	-0.253689	1.66465	1.78894	1.03371	0.773251	0.967695	0.566015	0.464136	0.413973	0.550136	0.357628	0.471109	0.702952	0.376687	0.580492	0.124196	0.325685	0.805385	-0.439702	0.977772	1.3576	1.77777	1.18961	2.01586	1.37886	0.986632	2.50393	2.2487	-0.47023	1.91278	1.39101	0.966551	-0.272904	1.80374	1.0818	2.7375	0.100179	-0.547848
576	1.96492	-0.971494	1.02925	1.43398	0.754693	0.457508	0.674027	1.04575	0.47577	0.64115	0.922181	0.166537	0.0511942	0.3077	0.110309	1.05935	-0.192137	-0.100038	0.697489	-0.932333	2.12718	0.754856	1.74423	-0.130647	1.85477	0.302926	0.36519	1.9389	2.05673	0.833227	0.818906	0.527126	0.829233	0.556293	2.33569	1.17355	1.54548	0.171324	0.721541
577	1.31803	0.59249	1.74336	1.76275	0.785143	1.18828	0.715628	0.684686	0.246199	0.295087	0.404183	0.124516	0.628317	0.421459	-0.0681445	-0.00260903	0.462112	0.0710252	1.84849	0.677721	0.474535	1.42977	1.61893	0.201797	1.52619	0.851762	0.206965	2.45154	1.87348	0.82458	1.4389	-0.457939	0.699776	-0.692813	1.68802	1.57725	0.875536	0.483356	-0.953113
578	1.49025	0.12635	1.58985	1.25805	0.757716	-0.835391	0.703673	0.94947	0.544202	0.492087	1.12762	0.077599	0.724636	0.374187	0.244356	0.511415	0.141644	0.498025	1.68058	0.53115	-0.219746	0.952043	1.43769	-0.0617622	1.54819	1.0918	-0.851957	1.65623	2.57837	1.31243	1.75617	0.979547	1.95329	-0.92758	2.97433	1.31259	1.03183	1.00454	-0.285361
579	1.98947	-0.00152106	1.33438	1.66145	1.23811	1.07844	0.711046	0.71552	0.489522	0.254856	0.878205	-0.204433	0.164014	0.558536	0.408718	0.303801	-0.664434	0.0813291	1.14524	0.975575	1.23875	1.26319	1.5938	0.0357692	1.95056	-0.601572	-0.161357	3.25234	1.76073	0.00837107	0.245754	1.12881	2.1102	0.208054	2.50682	1.01492	0.727535	0.997804	0.599728
580	1.3897	-0.589236	1.33722	1.24275	0.808255	0.901218	0.781273	0.695623	0.749229	0.0431095	0.660149	0.151996	0.735434	0.320412	-0.0932642	0.321302	0.491679	0.301803	1.17816	0.152088	-1.00136	1.16222	1.84655	0.908564	1.97529	0.928857	0.28072	1.85952	1.8428	0.788501	1.75745	0.211443	1.13352	0.22991	2.54324	1.0814	1.66159	0.259451	0.417075
581	1.50508	0.174162	1.41636	1.39169	0.889152	0.814021	0.849478	0.458287	0.332337	0.271538	0.434854	-0.0618499	0.512014	0.366343	0.185342	0.338823	0.125471	0.184967	2.14748	1.89888	0.544057	0.669717	1.39727	0.909325	1.75757	0.762032	0.0515275	2.34635	3.22914	1.1271	1.61106	0.52571	1.66941	-0.74707	-0.139496	0.858042	0.31867	1.67336	0.163655
582	1.27367	-0.231653	1.22513	1.87359	0.6435	1.65241	0.706448	0.641165	0.310408	0.261413	0.700662	-0.120296	0.614819	0.431952	-0.0326247	0.795626	0.131562	-0.0632616	1.49323	1.69779	0.473381	1.27458	1.66452	0.046791	1.2801	0.958273	-0.48307	2.39739	2.63264	0.0995013	0.947053	-0.352663	1.60497	-0.422888	1.13646	1.02457	-0.705085	1.22381	-0.51153
583	1.43552	-0.134489	1.04009	1.39008	0.758287	0.427204	0.642972	0.811924	0.37397	0.3573	0.534429	0.105579	0.505685	0.512949	0.246129	0.429353	0.532584	0.24751	2.01883	-0.627342	-0.655661	0.788547	1.84041	0.441379	1.80395	0.365701	0.0893335	1.66905	1.37552	0.54232	1.13419	1.29106	1.11831	-0.210245	0.915568	0.939492	1.25507	-0.150314	1.06096
584	1.42633	0.0730162	1.38691	1.50614	0.915536	0.90465	0.718528	0.564043	0.474252	0.05436	0.631353	-0.322832	-0.30764	0.691136	0.101594	-0.162236	-0.0349377	0.222437	0.686897	0.0146878	0.946735	0.992503	1.89765	-0.0275585	2.48562	0.571184	-0.421358	1.18071	1.52674	0.926829	0.06726	0.848815	1.2393	-1.57385	1.52273	-0.443255	1.92384	0.379215	-1.02381
585	1.48862	-0.204813	0.534541	1.13777	0.715237	1.02185	0.680709	0.722938	0.125071	0.287275	0.510758	-0.0905327	0.335315	0.366955	0.058269	0.312773	0.445219	0.0708309	0.654221	1.38889	1.59724	1.10949	2.06122	0.190298	1.76467	0.203997	0.225049	1.52812	1.25578	0.645496	1.42808	1.20449	0.441252	-1.54454	1.07324	0.742618	0.281993	0.576342	-0.0376573
586	1.59198	-0.29046	1.1096	1.54913	0.476209	-0.628979	0.636257	0.680857	0.312076	0.342575	0.685011	0.0299589	0.482908	0.702292	-0.107436	0.463246	0.228268	0.529249	0.612072	0.493526	-1.06541	0.75079	1.50204	-0.0121253	1.37171	-0.0556159	-0.483397	3.26998	1.77454	-1.10032	0.833276	0.997806	1.12388	-2.4614	2.10664	0.0818652	1.28024	0.8863	0.354666
587	1.13628	-0.211158	1.06454	1.28504	0.489505	0.845734	0.619791	0.621475	0.183538	0.5659	0.594334	-0.245425	0.476844	0.671326	0.399526	0.90031	-0.370138	0.220361	0.778926	0.119657	1.90872	0.496524	0.749188	0.973437	1.42256	-0.661339	0.533707	3.10316	2.60738	1.0901	0.842087	-0.678371	0.901146	-1.69473	0.56128	0.694849	0.987203	0.60045	0.657581
588	1.09622	-0.24291	0.746332	1.20161	0.915389	0.633718	0.485025	0.965904	0.263844	0.549452	0.868639	-0.476427	-0.220672	0.362306	-0.074944	0.293216	0.0390117	-0.194952	1.46143	0.67013	0.625226	0.851264	1.85115	0.355335	1.68252	0.335438	0.324795	3.06837	1.88474	-0.181228	1.84271	1.59493	1.1201	0.561533	1.78023	0.347587	1.636	1.09161	-0.00867549
589	1.25198	-0.416416	0.819319	1.28792	0.90575	0.424186	0.514573	0.587224	-0.0223303	0.584755	0.721276	-0.47832	0.566615	0.876278	0.0224313	0.173551	-0.451227	-0.473029	-0.2158	1.27407	1.30983	0.960005	1.43474	0.437892	1.52736	0.645517	0.912033	1.64636	0.983333	0.405117	1.91485	0.901927	-0.235608	0.461041	1.57496	0.562262	0.221122	0.286145	-0.252639
590	1.82956	-0.313738	1.15834	1.11365	0.485388	-0.538445	0.548827	0.746179	-0.232031	0.307451	0.382462	0.100086	0.173679	0.232994	0.322557	0.106188	-0.0346702	0.254249	0.510747	1.06241	1.85922	1.29299	2.02632	0.407516	1.56489	0.464979	-0.0836488	1.64149	2.05921	0.271113	1.90059	0.116614	0.533487	1.46355	1.78721	-0.379506	-0.21054	0.705728	0.502375
591	1.27002	-0.319398	1.98765	1.38214	0.803638	0.707686	0.554542	0.842372	0.225848	0.603989	0.98523	0.190512	0.346635	0.101597	0.196446	0.94874	0.0740729	0.487291	0.0372013	0.807316	0.309722	0.886354	1.26714	0.536783	2.05008	0.0562511	0.517188	1.62236	0.0300378	-0.5414	1.09347	0.903702	1.04352	0.713527	1.41209	0.557435	1.2969	-0.0134982	-0.542459
592	1.16923	-0.28308	0.6948	0.961624	0.704023	-0.0314594	0.763163	0.603598	-0.0015436	0.0876817	0.732474	4.44138e-05	0.577113	0.288114	-0.22695	0.150969	-0.0384973	-0.105663	0.653278	1.24268	1.16613	0.713372	0.833958	0.558111	1.99416	0.422883	-0.0806363	0.610497	2.90039	0.809254	2.03139	0.323318	1.22508	-0.992609	2.92999	-0.135619	1.55999	-0.0154497	-0.489384
593	1.14453	-0.237325	1.19959	1.13334	1.09635	1.06831	0.866452	0.62034	0.185627	0.543213	0.526759	-0.43695	0.149043	0.168066	-0.220647	0.297732	0.638611	-0.784034	0.398709	1.01338	-0.817722	0.768096	1.57582	0.423966	1.31045	0.670301	0.252497	2.20888	2.73455	0.246649	0.587895	0.306815	0.179275	0.281945	1.91641	0.718405	1.3325	-0.741668	-0.679904
594	1.17449	-0.327697	1.42358	1.40215	0.355992	0.981756	0.463142	0.475037	0.272306	0.107079	0.514324	-0.117651	-0.0730323	0.44406	0.185036	0.162865	-0.065822	0.682524	2.20195	0.69965	0.844612	0.722997	1.93599	0.573908	1.41612	-0.405455	-1.36589	1.5673	1.89846	1.11208	1.85222	0.806766	0.0441182	-1.24913	1.60095	0.325737	0.243456	-0.116695	0.811338
595	0.728811	-0.274734	1.12853	0.96515	0.697188	-0.151076	0.217356	0.92158	0.492483	0.205285	0.411803	0.283731	0.00985567	0.270302	0.140388	0.340739	0.108393	-0.433068	-0.153753	1.04793	-0.38496	1.92545	1.57647	0.505664	1.53946	0.549417	-0.321328	2.25755	2.16524	1.30214	0.662369	0.686378	0.729575	-1.3909	2.24067	0.96913	0.765055	1.22999	-0.340152
596	1.11474	-0.359483	1.13422	1.17221	0.872208	-0.12281	0.584502	0.969509	0.561953	0.494204	0.547555	0.257021	0.294148	0.352164	0.196167	0.0717907	0.488572	0.409935	1.03174	-0.613365	1.25992	1.06439	1.08003	0.384135	1.02545	0.0204827	-0.247384	0.309033	2.49767	1.86509	1.42141	0.280304	0.69117	-0.839355	1.91424	-0.260026	0.308446	1.09058	0.857547
597	1.27738	-0.397981	0.464252	1.09789	0.71237	1.09404	0.507789	0.0442507	0.42363	-0.369692	0.22623	0.268896	-0.352311	0.441947	-0.166398	-0.0927356	0.110698	0.581396	0.627206	0.83496	0.172281	0.394145	0.617393	0.822003	2.28046	0.302776	-0.226265	1.66984	0.0709836	0.625525	1.35911	0.842309	0.42166	0.494219	0.955435	1.17431	0.502573	0.692161	0.473589
598	0.817808	-0.258257	0.456771	0.779081	0.628956	0.688762	0.406232	0.617248	0.214891	0.219951	0.651239	-0.0150815	-0.752928	0.235508	0.189682	-0.228571	-0.127611	0.0146449	-0.309709	1.43102	0.693688	0.803179	1.55436	0.664687	1.52167	0.00190907	-0.216601	2.35973	2.46693	0.0077982	0.578738	0.703285	0.368104	0.179333	0.888306	0.709327	1.67286	-0.22695	-0.750192
599	1.02546	-0.394978	0.367047	1.0529	0.378833	0.822338	0.646071	0.339738	0.122966	0.487394	-0.10553	0.0660035	0.38664	-0.652617	-0.122418	0.156231	-0.116459	0.236816	-0.151026	0.735264	1.5411	0.250329	1.28046	0.451016	1.69786	-0.265395	-0.575754	1.94781	1.18299	-0.849991	1.76208	0.236081	0.802257	-2.69211	2.48745	0.516756	0.736744	-0.425987	0.00764202
600	0.76762	-0.770074	0.217221	0.947625	0.449467	-0.116484	0.483318	0.582427	0.407728	-0.0832211	0.454703	-0.062009	0.0859534	0.282078	0.0659906	0.000858924	-0.341579	-0.00339089	0.627148	0.687121	1.4099	0.317816	1.18703	0.705573	0.765098	0.678165	0.00967449	1.41102	1.37078	-0.484707	0.197833	1.91423	0.675195	-1.78723	0.518403	-0.777856	0.71823	-0.0261312	-0.237662
601	1.34454	-0.280713	-0.115897	0.549414	0.393272	0.793964	0.64048	0.547252	0.0956415	-0.176626	-0.240088	-0.224318	0.230089	0.0747138	-0.399021	-0.00285098	0.0637438	-0.270576	-0.390491	-0.0546243	0.826224	0.569178	1.27055	0.421631	1.15294	-0.578162	0.290181	2.06004	0.0133913	-0.227118	1.22122	0.850944	-0.199097	-1.73023	0.814237	0.0854372	-0.260414	1.46736	-0.971297
602	0.939827	0.219977	0.441751	0.633564	0.49201	0.280859	0.464047	0.33574	0.232927	-0.230046	0.0355199	-0.0504572	0.209536	0.150016	-0.158649	-0.169474	-0.181314	0.148569	0.031824	0.319037	0.854965	0.643404	0.335791	0.621344	1.3248	0.510241	0.178648	0.536597	2.41297	-0.604656	0.496308	0.386156	0.953992	0.0372257	0.662488	0.344292	0.345176	0.792529	0.500395
603	1.30193	-0.340512	0.085246	0.82687	0.561733	0.745443	0.36003	0.446253	0.372828	0.246196	0.0560217	-0.274265	0.354387	0.282655	-0.233583	0.153731	0.055637	-0.0753836	1.119	0.536725	-0.0179234	0.561938	0.612558	0.840989	2.0457	-0.280791	-0.18154	2.28944	2.10007	-0.289575	-0.111792	-0.0607103	0.770082	-1.27692	2.03701	0.568653	-0.00669468	0.33758	-0.690807
604	0.310186	-0.318923	0.0028075	1.17968	0.329497	0.641764	0.193615	0.72684	0.166163	0.411571	0.0728075	-0.287561	0.36771	0.20901	-0.0564966	-0.302043	-0.0979819	0.588533	1.01422	0.610239	0.951728	0.0396352	1.15377	0.0395186	1.16921	0.131105	-0.537616	2.12099	1.95257	-0.125459	1.03014	-0.131886	0.890385	-0.160035	0.671415	-0.133874	1.06795	0.141245	-1.22777
605	0.615571	-0.30237	1.30371	0.486299	0.38527	-0.0502084	0.292419	0.719256	0.266986	0.341768	0.460504	-0.357806	-0.143641	0.1755	-0.17619	-0.129855	0.0323452	-0.0280477	0.757092	0.0336025	0.353346	0.978632	1.47454	0.569173	1.45481	-0.627816	-0.235711	0.0482067	2.2011	-1.31314	0.18767	0.046672	-0.31961	0.0405443	1.97152	0.477388	-0.276014	0.464264	1.59552
606	0.717498	-0.285792	1.12947	0.629431	0.54321	0.789342	0.599419	0.341969	-0.17167	-0.0323945	0.610904	-0.0234601	-0.207932	-0.146664	-0.149592	0.111652	0.0844431	-0.171359	-0.86586	-0.528848	0.353038	0.551327	0.66197	-0.89136	0.872452	-0.433449	-0.135261	1.5841	2.27546	-0.381468	0.744729	0.200037	0.793151	-0.20422	2.08096	0.150719	0.643548	-0.665722	-0.10092
607	0.897414	-0.157898	0.794044	0.780912	0.182202	0.215509	0.443969	0.456736	-0.180102	0.21434	-0.113999	-0.0510552	0.157743	0.0605001	-0.171032	-0.595025	0.268823	0.136186	-0.380654	0.357288	0.268492	0.909128	1.0033	-0.188452	0.901138	-0.457872	-0.914564	1.92906	1.20804	0.180995	0.276527	0.243235	0.113691	0.150673	0.548259	-0.0731634	0.670793	1.07054	-0.771964
608	1.13403	-0.237237	0.54733	0.392432	0.233718	0.722415	0.0411164	0.686603	0.277071	0.107524	0.100738	-0.273785	0.0914528	-0.0871599	-0.118034	-0.0619676	0.120224	-0.206612	0.599788	1.13439	1.38158	0.613284	0.757675	-0.322966	0.33311	-0.703471	0.0363255	1.61892	1.77811	-0.891493	1.19092	-0.194758	1.03256	-0.525118	2.18402	0.47062	0.610985	0.298308	-0.170432
609	0.662593	-0.414153	0.477979	0.558186	0.137679	0.287313	0.566944	0.626487	0.115196	0.223497	0.24641	-0.183366	0.267091	-0.340809	-0.411706	0.19331	-0.276703	0.00820649	0.0846046	0.942905	0.0180443	0.809828	0.765159	-0.376426	0.830634	-0.917421	0.446344	1.19368	1.26974	-1.00863	1.18374	-0.285536	-0.342955	-0.777981	2.71155	1.39586	0.467042	0.747956	-0.0831262
610	1.23206	-1.03638	1.06259	0.498208	0.580371	0.998895	0.278091	0.445803	0.0601102	0.127536	0.268659	-0.486082	0.187389	-0.0159207	-0.266988	-0.354707	0.0244235	-0.124276	-0.735907	0.0167082	-0.20077	0.954809	1.37848	0.0220309	0.738622	0.416863	-0.428698	2.04776	1.96121	-0.0430892	0.940993	0.198502	0.898085	-0.196069	2.16874	0.767042	1.08318	0.940041	0.635886
611	0.751502	-0.668575	1.09377	0.506068	0.633317	0.404647	0.303939	0.344164	0.152426	0.130424	0.376424	-0.0650599	0.0810655	0.0990743	-0.332778	-0.0666856	0.0198351	-0.120926	-0.859428	0.10988	0.215767	0.384183	0.722643	-0.370484	1.88823	-0.090923	-0.220282	1.86314	0.726953	-0.641635	0.820555	0.130913	0.995647	-2.03969	2.09686	1.4139	0.862232	0.131158	-0.862643
612	0.71741	0.0436494	0.821004	0.752338	-0.0168994	0.755936	0.537048	0.50992	-0.0813388	-0.035347	0.401133	-0.225874	0.218737	0.134249	-0.442394	-0.131871	0.00487646	-0.167279	-0.183527	0.219495	0.971954	0.00255116	1.32602	0.206125	1.30556	-0.00806589	-0.943999	0.607921	1.27951	-0.425143	0.277302	0.739915	0.18477	-1.02474	1.99639	0.257095	0.124124	0.671445	-0.646096
613	1.09609	-0.290415	0.798421	0.72744	0.10692	0.213701	-0.00178088	0.391909	-0.0222101	0.517358	0.0968065	-0.0383885	0.508711	-0.450538	0.0208735	0.0341271	0.11934	-0.0900111	-1.30028	-0.525917	0.74734	0.127859	1.25634	-1.11044	0.65028	-0.713378	0.20902	1.60184	1.5878	-0.784828	-0.228298	-0.705462	0.994842	-0.28431	1.2567	-0.565188	-0.48211	0.754049	0.302465
614	0.504582	-0.294237	0.778277	0.308536	0.279778	-0.100272	0.178618	0.540214	0.319636	0.158462	-0.00911516	-0.238562	0.186176	0.28683	-0.299512	0.0987884	0.101891	-0.0965678	-0.314371	0.880639	0.302888	-0.179787	0.810973	0.810338	0.40167	-0.516587	0.619499	1.8636	0.497182	-0.0304693	-0.0770087	0.0685282	0.135858	-0.339992	0.876311	-0.645957	-0.501592	-0.228741	-0.145898
615	0.666414	-0.259831	0.507942	0.343633	0.344307	-1.27782	0.258032	0.365777	0.0454107	0.420051	0.0862681	-0.0121081	-0.0420812	0.0702754	-0.294624	0.0689881	-0.05646	-0.0803984	0.283054	1.40077	1.08284	0.693876	1.13714	0.199296	0.706091	0.17385	-0.793415	1.3498	0.723894	-0.229811	0.33173	-0.707818	0.617124	-3.18603	1.37938	0.775429	1.0996	1.44194	-0.366318
616	0.33196	-0.372614	-0.262473	0.222878	0.177881	-0.0313947	0.392076	0.511386	0.0474548	0.0719607	0.35932	-0.211364	0.357008	-0.266678	-0.262657	-0.00190334	-0.424232	-0.690968	-0.660819	0.00172759	1.44004	-0.117774	0.616447	-0.382618	0.586695	-0.285162	-0.717738	0.730892	1.47388	-0.509351	0.357664	0.168758	0.452357	-2.55184	1.62284	1.30701	1.02637	-0.317644	-1.57438
617	0.446357	-0.252989	0.56152	0.291364	0.137631	-1.06201	0.473436	0.358728	-0.0142441	0.598272	0.297452	-0.159592	0.586635	-0.10577	-0.306057	-0.231151	0.162775	-0.268304	0.502432	-0.289732	1.45346	0.855327	0.284028	-0.387766	0.516149	-0.886873	-0.673899	1.77769	0.714695	-0.984869	1.40678	0.496917	-0.282943	-0.843181	2.15247	0.918507	-0.85255	-0.760143	-0.331272
618	0.400777	-0.828222	0.421956	0.709138	0.403937	0.65651	0.0549207	0.211882	-0.0123804	0.408823	0.521971	-0.37991	-0.0700216	-0.129677	0.0876927	-0.281396	0.174544	-0.00960398	0.526681	1.46287	0.133561	0.779496	1.41467	-0.178088	0.833351	0.513065	0.184405	2.22562	1.67644	0.0389805	0.557662	-0.725801	-0.0325187	-2.37472	2.79131	2.35685	0.687793	0.753786	-1.51001
619	0.187752	-0.293028	0.111383	0.66248	0.458679	0.103524	0.0790831	0.381577	0.0540981	0.403672	0.103854	-0.397776	-0.0511313	0.0159359	-0.482635	0.0623345	-0.0527975	-0.0498415	-0.495874	0.611547	2.13096	-0.439997	0.646233	0.655294	1.14245	-0.529967	-0.507009	2.15179	1.71167	-0.54788	1.04299	0.601891	-0.537833	-0.477869	1.198	-0.135942	-2.12217	0.296804	-0.425205
620	0.197733	-0.116183	0.215682	0.522468	0.693781	0.791759	0.233492	0.236619	-0.054029	0.0791487	0.241175	-0.27051	0.0780261	-0.0453952	-0.158661	-0.612707	0.44238	-0.3067	-0.0341123	0.320569	1.93292	0.597919	0.982755	-0.11268	1.32104	-0.526729	-0.425077	0.980369	-0.0313743	-0.623979	1.18103	0.338643	0.774922	-2.63387	1.40447	0.209078	0.467999	-0.0634421	-0.575247
621	0.439783	-0.785756	0.403123	0.713472	0.0753019	0.0964929	0.4584	0.632186	0.222391	0.581178	0.376781	-0.466009	0.0495172	-0.483202	-0.637268	-0.396262	0.51207	-0.0140048	0.59473	1.32787	0.533562	-0.334446	0.809355	-0.221331	1.21306	-0.578929	-0.34519	0.822035	2.16508	-0.728191	0.183573	0.697331	1.0881	-1.61987	2.28748	-0.189357	0.811775	0.206398	-0.320775
622	0.47999	-0.36588	0.622693	0.697638	0.180004	0.469759	0.00273006	0.162373	0.003236	0.128077	-0.0340548	-0.405626	0.0709141	0.142516	-0.278529	-0.0244652	-0.145306	-0.66213	-1.20652	0.401827	0.247824	-0.148587	1.29472	-0.465284	1.29459	-0.658778	-0.213201	1.69827	0.794342	-0.294018	0.792758	-0.523647	0.100693	-1.20427	-1.19243	-1.04158	0.456642	0.0164646	-0.0356433
623	0.973198	-0.313512	0.930795	0.452037	0.493222	-0.486327	0.227646	0.277843	0.0634319	0.617051	0.204925	-0.40047	0.266898	-0.391305	-0.0345044	-0.13171	0.0809452	-0.175372	-0.733324	-1.00446	0.322275	0.7589	0.692636	0.0939604	0.967091	-0.0392524	-0.355053	1.84654	1.10372	-1.76184	0.248533	0.0516367	-0.458642	-0.764344	2.39419	1.45097	-0.034417	-0.10329	-0.0205826
624	0.582135	-0.642644	0.923821	0.437084	0.129727	0.368734	0.30229	0.417461	-0.120583	0.517497	0.324179	-0.188293	-0.0255079	0.108247	-0.603079	-0.724831	0.131809	0.0592194	-0.0934102	0.376544	0.710426	0.130142	0.771393	-0.16332	1.51256	-0.349345	-0.187468	1.4851	0.58406	-1.14686	0.179768	0.228913	0.141339	0.0775806	1.4442	1.61849	0.580498	0.854416	-1.177
625	0.200681	-0.435661	-0.0181727	0.640625	0.0869573	-0.0196539	0.183548	0.175481	0.145497	0.0404321	0.563066	-0.215321	0.324838	-0.0233522	-0.636012	-0.142114	-0.04288	0.0329946	0.490995	1.02568	-0.392551	-0.919941	0.737394	-0.0127436	0.917785	0.805492	0.146209	2.30251	0.723824	0.443589	0.179535	-0.70485	0.996034	0.301177	2.93748	-0.523241	-1.07051	0.394451	-0.505521
626	0.155779	-0.358764	1.08072	0.421649	-0.149305	0.807685	0.386092	0.35018	0.0579007	0.372283	0.542976	-0.319009	0.205027	0.353824	-0.133811	-0.244701	-0.331435	-0.0758403	-0.335768	0.967004	-0.165433	0.734701	0.845348	0.409757	1.17951	-0.77925	0.00697525	1.71004	1.60131	-0.108422	0.633597	-0.335301	0.0124079	-4.66864	1.6446	0.119415	-0.00583412	1.10798	-0.602671
627	1.0181	0.097745	0.524374	0.70204	0.886853	1.17159	0.325536	0.532248	0.0794089	0.316172	0.102469	-0.118531	0.680118	0.745786	-0.0433784	0.0882434	0.629228	0.72148	-0.325403	-1.92055	0.0332139	0.19778	1.00229	0.809881	2.32168	-0.100387	-0.160357	1.76106	3.52605	0.390141	1.10494	0.564749	1.14673	0.828814	0.0935725	1.03177	0.58606	1.06338	0.379933
628	0.688822	-0.234772	1.53924	0.530147	1.03536	0.071546	0.382337	0.640379	0.153117	0.571601	0.429926	-0.266487	-0.334029	0.155231	0.340118	0.446552	0.824863	0.238198	0.654884	-0.573441	0.849389	0.669843	1.35422	0.160534	2.82853	0.605474	0.186227	1.39248	1.47438	0.674004	0.977861	0.541896	0.822225	-1.70229	2.06076	1.57021	1.6021	0.542059	0.156397
629	0.567218	0.0377732	1.10669	0.63234	0.667788	-0.0127147	0.280224	0.749604	-0.081414	0.635254	0.536791	0.236072	0.829432	0.529159	0.204938	-0.353377	0.26658	0.321478	1.01826	1.52478	0.79581	1.16137	1.31114	0.385238	1.85344	0.652396	0.00539932	2.24099	2.61085	1.31381	1.37302	0.727786	2.54268	-0.268933	1.90494	-0.0374706	0.966611	1.7593	-0.921143
630	0.947405	-0.243373	0.885687	0.704938	0.748261	0.893528	0.658417	0.836329	0.189219	0.520613	0.344684	-0.0579493	0.699212	0.643987	0.588713	-0.0433172	0.189997	0.40151	0.319928	0.632791	-0.500411	1.20347	0.905125	0.772547	1.46197	0.994225	-0.223744	1.50731	2.65173	-1.16086	1.6706	0.308807	0.0289664	-0.753734	1.81909	1.90844	-0.312134	0.930025	0.231991
631	0.569773	0.122586	1.14717	0.797223	1.18604	1.57043	0.758636	0.811789	0.22191	0.329395	0.283585	-0.00707497	0.533823	0.936935	0.424232	0.064129	0.521967	0.661719	-0.197633	2.25488	1.77642	0.42103	1.75778	0.769952	0.74025	2.31431	0.149738	3.1074	2.26466	1.48552	1.51822	1.23889	0.476781	0.474719	1.04825	-0.442522	2.34289	0.659607	-0.832393
632	0.632082	0.0212152	1.10602	1.17602	1.41993	1.22761	0.744862	0.640077	0.298233	0.173339	0.409465	0.151874	0.699105	0.556418	0.500136	0.330214	0.557131	0.652188	0.317505	0.591711	0.678622	1.24378	1.29545	1.29277	2.01188	0.524817	0.929207	2.32703	2.51454	0.57584	2.14792	1.2152	1.67077	0.963221	1.70766	1.7711	0.716631	1.92174	-0.271792
633	1.29732	0.237486	1.50647	1.77922	1.2175	1.3663	0.486681	0.799677	0.461431	0.563516	0.29963	0.489004	0.682668	1.12193	0.384599	0.415744	0.511926	0.602965	0.812175	0.46723	0.878723	1.46168	1.26501	1.32533	2.22771	0.366668	1.13165	2.90131	1.67372	1.65191	2.68524	1.72908	2.27002	1.02577	2.23747	0.941071	0.540829	0.360012	-0.385718
634	0.979728	0.32688	1.49482	1.50308	1.74349	1.38349	0.581509	1.05297	0.541061	0.192139	0.506001	0.267964	0.618019	0.483944	1.205	0.501959	0.704145	1.01327	0.871575	0.942108	1.57433	1.10111	1.83395	1.08954	0.88472	1.57582	2.0781	3.42488	3.85956	1.37139	2.64587	2.39617	1.92483	1.7848	2.96296	0.980404	1.78092	0.193938	-0.070625
635	1.06879	0.177101	1.72158	1.93712	1.64049	1.41784	1.02347	0.900284	0.572474	0.428152	0.599287	0.470733	0.620519	1.03744	0.889642	0.498168	0.210532	0.971106	0.740953	0.715347	1.47264	0.7661	1.07565	0.603807	1.20934	1.13294	2.26501	3.59511	3.16388	1.93011	1.93963	1.81332	0.942473	-0.592087	1.38381	2.21996	1.48107	1.90532	0.780361
636	0.670695	0.538959	1.50047	1.0461	1.69607	1.63734	0.625276	0.818238	0.471576	0.734001	0.225261	0.586865	0.610889	1.16564	0.906428	0.947954	0.90873	1.0033	1.67318	1.16494	1.51376	0.649631	1.42534	0.746935	2.26332	1.63511	0.997885	3.39494	3.5765	2.05144	2.72948	1.06021	0.988434	-0.592954	1.63529	1.18668	1.9843	1.22381	0.114116
637	1.21435	0.22397	1.36234	1.83242	1.90741	1.50741	0.598878	0.614321	0.732966	0.613508	0.681098	0.349737	0.936327	1.0733	0.73944	1.11917	0.939985	1.45064	1.57354	1.98699	0.238008	1.06056	1.44899	0.620094	1.40434	0.858503	1.13527	3.63356	2.5561	2.20979	3.18856	1.48148	1.82207	0.0469009	0.93432	1.73722	1.05751	1.36277	-0.511249
638	-0.926011	0.330152	2.58324	1.96986	1.96964	1.66864	0.690806	0.878371	0.506446	0.561135	0.588705	0.216911	1.30188	1.24711	0.699282	0.861961	1.11159	1.21569	0.990465	1.71143	1.73337	1.56129	1.19935	0.192174	1.68777	1.70233	1.35086	2.58884	1.99311	1.27731	2.31445	1.42933	1.93648	0.941382	2.7658	2.48729	2.04341	1.83131	0.4276
639	-0.43728	0.628286	1.88814	1.73984	2.14299	1.90764	0.784072	0.864526	0.437202	1.08176	0.354588	0.975423	0.935587	1.43507	1.10059	1.61175	1.10373	0.825844	2.38572	0.755899	-0.481857	1.75607	1.73323	1.20198	1.93847	0.970417	1.64914	1.45757	2.72826	3.23967	2.64252	2.81371	2.58656	-0.0149999	1.39746	1.93769	1.46036	2.21219	-0.282694
640	1.42696	0.624902	1.98812	2.04287	1.9328	1.83375	0.691465	0.931104	0.381681	0.956581	0.761161	0.729998	1.47421	1.04918	0.909996	1.36657	0.885171	0.97393	2.0474	1.65928	0.189021	1.39813	1.54797	1.21546	2.08987	1.92315	2.53773	2.13315	0.705833	2.47407	2.58847	2.92496	1.82981	0.928475	2.30103	2.18989	1.94772	1.95017	-0.864144
641	1.26201	1.25731	1.70567	2.33553	1.60707	1.07117	0.872062	1.00465	0.54291	0.883185	0.555181	0.564379	1.40677	0.927764	1.17839	0.879926	1.44401	1.29415	2.0114	1.23542	2.29253	1.0787	1.05119	1.35444	1.10901	1.42392	1.32327	2.03326	2.69605	2.74076	3.19647	2.01542	2.00062	0.550577	1.89709	1.83223	2.48592	-0.0874396	0.147264
642	1.11002	0.866774	1.65955	2.72193	1.97757	1.56905	0.939298	1.25797	0.550169	1.26799	0.538879	0.496356	0.836776	1.44929	1.203	1.7233	0.824308	1.73866	1.73668	0.792057	0.143194	0.68618	1.65032	0.986268	1.7896	1.16096	2.15813	3.58835	2.67417	3.07632	2.47472	1.09878	1.92681	-0.879992	1.61382	1.3737	2.37841	1.98417	-0.746566
643	1.34445	0.57083	2.23373	1.92674	2.09918	1.32297	0.964969	1.49466	1.08721	1.16484	0.773284	0.825677	1.45028	0.99274	1.1626	1.36957	1.52456	1.70736	2.51612	1.7209	1.66593	2.13969	1.61765	1.43056	2.04402	1.91114	2.67987	2.5603	3.26734	2.98735	3.99763	2.65049	3.24361	0.679968	1.53701	2.39856	2.78907	1.99241	0.584973
644	1.41611	0.984897	2.23413	2.23998	2.10801	1.41189	0.571362	1.31722	0.932041	1.02183	0.759008	0.00402053	1.54244	1.39845	0.903598	1.61039	1.32753	1.44736	1.97872	1.16858	1.84993	1.48331	1.86481	1.81168	1.84517	1.91872	1.54864	3.06645	2.29603	2.39185	3.0591	2.07716	2.19515	2.33183	2.19628	2.02432	2.54479	1.93448	1.26641
645	1.36243	0.888657	2.13223	2.17667	2.6047	-0.523211	0.615539	1.23855	0.48067	1.32132	0.724058	0.871868	1.22073	1.42802	1.56892	1.7654	1.15231	1.8406	2.97702	1.41302	1.62793	1.73501	1.63748	2.0033	0.897497	1.84082	3.06819	2.08712	3.82115	2.59684	3.511	1.03781	1.86631	-0.514544	2.62237	1.76366	2.20387	2.14813	-0.19835
646	1.45651	0.656373	2.30888	2.23942	2.2207	2.10392	0.990352	1.20977	0.862782	0.828429	0.825898	0.743812	1.2425	1.84206	1.2318	1.72895	1.26335	1.73629	1.34425	0.445851	2.04271	1.71236	1.77924	1.58677	2.47409	2.67683	4.09957	2.77845	4.57953	2.1894	2.86257	2.86324	3.53663	1.97615	1.76429	2.95513	2.54169	1.32296	0.729251
647	1.76819	0.547887	2.20276	2.53749	2.67229	2.09154	1.07659	1.28752	0.28908	0.914643	1.07788	0.854392	1.30376	1.5253	1.55895	1.86134	1.51222	1.48148	2.92208	2.09503	1.59062	1.10245	1.62819	0.39334	2.52064	2.51271	3.21241	4.21585	3.14771	3.14645	3.54561	2.43504	2.65184	-0.281841	1.21485	2.58569	2.24524	2.0366	0.872883
648	1.27989	0.506649	1.7672	2.7713	2.67234	2.14227	0.891935	1.47841	0.897967	0.839021	0.90442	0.585575	1.0954	1.28115	1.30817	2.189	1.15465	1.8461	2.61257	1.24996	1.87074	1.84033	1.56826	2.06668	2.37713	2.58182	2.1291	1.56858	3.11455	2.72941	3.70309	3.46029	1.94013	-0.671212	2.50067	2.93971	2.96489	1.55169	0.0968937
649	1.76102	1.14141	2.65166	2.5579	2.0958	1.56667	1.27813	1.40122	0.790562	0.883652	0.953181	0.691429	1.73564	1.64305	1.62764	2.16246	1.20733	1.25763	3.78909	2.20357	1.86159	1.52367	2.05737	2.04361	2.18644	2.35995	2.71665	2.7413	3.96548	3.20711	4.75604	3.24328	2.05875	0.796166	2.26553	1.58039	1.47146	1.41622	0.894658
650	1.46204	0.523795	2.76551	2.71092	2.14191	2.47194	0.969379	1.08779	0.754549	1.26843	0.874555	0.853162	1.36325	1.8662	1.62208	2.0919	0.988502	2.26031	2.73433	1.68662	1.32923	1.52783	2.44695	1.03475	2.30282	3.39687	2.56755	3.26046	2.91632	3.38125	2.85684	2.70576	1.78737	2.6201	1.24605	2.56711	2.02049	0.977151	-0.549619
651	1.79547	0.80212	2.55616	2.51315	1.93862	1.74986	0.641694	1.33478	0.94647	1.18788	0.898285	0.894532	1.92975	1.76795	1.61201	2.1621	1.27348	2.00177	3.18841	1.35326	2.48909	1.19472	1.30968	1.20444	2.08593	2.12289	3.34595	2.76426	3.5907	2.87982	4.09667	2.93977	2.94383	2.2563	2.12694	2.90381	2.85366	2.47471	0.872055
652	1.67821	0.485732	2.44558	2.70864	2.06214	0.238938	0.817058	0.888001	0.39109	0.957474	1.26522	0.897374	1.22648	1.35344	1.46257	1.89275	1.50409	0.635961	2.13674	1.82051	0.155916	1.88199	1.70715	1.57305	2.28915	3.45392	3.40105	2.47229	2.68336	2.53645	3.13708	2.41424	3.46993	1.50415	2.89708	1.89729	1.98017	2.62267	-0.00531315
653	1.27614	0.815058	1.96429	2.60473	2.03056	1.66144	1.0276	1.72231	0.554859	1.15954	0.750513	0.601837	1.42147	1.7205	1.10005	1.8069	1.72036	1.80758	3.28958	2.63006	2.49506	0.72285	2.13534	1.50033	2.09527	4.06567	2.45794	2.52174	4.286	3.72671	3.38075	1.29971	1.66697	1.3126	2.44374	3.39878	3.16374	2.47935	0.873524
654	1.79734	0.665308	2.6138	2.88331	2.11096	1.7029	1.22052	1.33386	0.6027	1.32243	0.928707	0.940294	1.50559	1.92099	1.28794	1.96776	1.53131	2.16471	3.90011	2.5495	1.38689	1.21458	1.94018	1.24575	2.38001	2.6323	2.12694	2.84319	0.693173	3.74097	4.76494	2.94611	3.08281	2.33822	1.93637	2.43185	2.23495	1.34564	1.76443
655	1.85229	0.678712	2.67458	2.35962	1.89939	2.1727	0.855481	1.19578	0.75252	1.10642	0.733452	0.973678	1.00604	1.41376	1.69893	2.25628	1.5988	1.99461	2.83952	0.405629	0.300777	1.74728	1.59446	0.787982	1.5675	2.42229	3.55946	2.96624	3.19773	3.90529	4.08814	3.55997	1.94292	2.2643	2.1539	3.19903	2.32237	2.95841	-0.282024
656	1.37889	0.621371	2.29689	2.94334	2.18745	2.20387	0.855449	1.10057	0.747681	1.34877	1.24431	1.13356	1.40976	1.80088	1.00708	2.11875	1.43796	2.24277	3.63821	1.95424	1.3632	0.366408	1.79515	1.95286	2.37488	3.53364	3.68413	2.49428	3.86237	3.25834	3.1966	2.26418	2.21714	2.37098	1.01721	3.0697	3.14527	1.43547	-0.851937
657	1.53289	0.626792	2.00231	2.69958	2.26725	1.92419	1.1591	1.4463	0.719709	1.14007	0.940179	0.791611	0.96539	1.4711	1.23673	2.31116	1.87347	2.34165	4.14779	2.5663	2.05788	1.2981	2.16042	1.18828	1.41637	3.14531	2.7849	1.92826	4.02428	4.11552	4.9192	3.33533	3.23977	0.0168595	0.266296	1.42162	1.42233	1.68226	1.00152
658	2.13693	0.513009	2.4485	2.68532	2.37234	2.04925	0.817765	1.18232	1.07532	1.34308	0.586596	1.03501	0.888459	1.80515	1.44793	2.18438	1.54932	2.34283	2.22607	1.99234	2.11539	1.61187	2.22659	1.39162	2.81858	3.22241	3.06509	3.19592	3.98271	4.0029	5.32528	2.9638	2.42827	2.31675	2.30126	2.30736	3.30268	2.01911	0.317958
659	1.53863	0.620956	2.8546	3.16181	2.49046	2.21342	0.675009	1.54244	0.930327	1.12864	0.81254	0.963403	1.17787	1.45773	2.15136	1.6284	1.41428	1.93183	3.85782	2.20605	2.75184	0.57295	1.489	2.21367	2.27123	3.38126	2.57413	2.93246	3.59082	4.53669	4.58067	2.71738	2.76626	2.60013	0.369821	2.24526	2.63696	1.32074	-0.374473
660	1.68924	0.556937	2.9202	2.67838	2.61206	2.39934	0.89844	1.37539	0.691393	1.22923	1.35813	0.633172	1.27947	1.67508	1.14527	1.76151	1.95297	2.18822	4.13483	2.56061	2.56723	0.573867	2.1408	1.13665	2.79688	3.07819	3.73101	2.18894	3.41461	3.63385	4.77708	2.90413	2.42709	2.2456	2.5263	2.7082	2.44854	1.14993	0.178329
661	1.81399	0.513639	3.14749	2.84124	2.92105	2.28739	0.854103	1.56513	0.88943	1.25539	0.768283	0.91185	1.44739	1.6959	1.46445	2.34328	1.46584	2.17044	3.49469	1.54034	2.04218	1.95272	1.99723	2.15849	2.85268	3.09493	2.89939	2.94553	3.63371	4.80174	4.50604	2.97129	3.52095	2.41337	2.43675	2.44771	2.78872	2.18678	2.01226
662	1.48683	0.893981	2.47596	2.54953	2.13806	2.79961	1.01505	1.49134	0.957863	1.55709	0.346825	1.31711	1.36337	1.7125	1.84251	1.96134	1.53214	2.11965	3.3529	1.26853	3.50499	1.5998	2.28442	1.96115	2.52944	3.4325	2.14226	2.97704	4.51677	4.23613	4.12601	3.46693	3.82291	3.25839	3.03585	4.066	1.63203	1.96909	-0.0406076
663	2.25185	0.902295	2.98954	2.87685	2.58345	2.63293	0.922095	1.44686	0.987367	1.18319	1.34635	1.01998	1.31407	1.54595	1.73556	2.27824	1.48882	1.83608	4.62593	1.46591	2.93564	1.15532	1.92361	2.06223	2.03648	4.05696	3.39142	2.78604	3.33916	4.26105	4.48084	3.49216	3.02465	3.28771	2.51982	4.27215	2.60303	1.37319	0.649963
664	1.71435	0.835768	3.32273	2.91735	2.27821	2.71357	0.841598	1.54244	0.99619	1.39809	1.07613	0.920403	1.02942	1.72649	1.5301	2.14297	1.65703	2.19379	4.47161	2.8374	1.87235	1.48713	1.54362	2.69373	1.62919	3.31399	3.35155	3.57117	4.43291	4.62887	4.35418	4.11742	4.50469	3.2085	1.30461	4.20533	1.80878	1.27857	-0.0442425
665	1.58137	0.669634	2.89053	2.96216	2.43407	1.31857	1.04104	1.83609	0.902822	1.39716	1.12793	0.673285	1.38183	1.78018	1.98001	2.24195	1.16496	1.77632	3.78067	2.89455	2.04622	0.719346	1.82884	1.69426	2.89407	4.49324	2.68927	2.20265	3.42475	3.05065	5.2415	2.65225	3.64324	2.91521	2.10958	4.03255	3.14555	1.66763	1.50088
666	2.25098	0.57364	3.44147	3.42502	2.29972	1.21596	1.10854	1.59026	0.824906	0.939113	1.24658	1.08947	1.72633	1.92213	1.5524	2.01947	1.62384	1.75785	4.23001	2.64503	2.8889	1.45925	2.28071	1.92999	2.57845	3.35606	3.6258	3.32475	3.66892	4.703	4.85197	2.03371	2.88129	2.93896	2.8749	3.35067	3.53285	3.19241	1.0573
667	1.29553	0.445024	3.08129	3.04404	2.28981	0.845202	1.27435	1.56772	0.708121	1.3626	0.561647	0.604296	1.28505	1.65835	1.45289	2.49097	1.82007	2.32104	4.68353	2.27238	1.46159	1.52365	1.96387	1.65597	2.18914	4.09851	3.71927	0.756958	4.28396	3.92256	4.56125	3.74249	3.27547	2.44294	2.58819	4.02698	3.67814	1.1329	0.174069
668	1.69015	0.682952	3.04138	3.49613	2.22578	2.65743	1.06494	1.47224	0.791749	1.13936	1.29153	0.859205	0.793189	1.99701	2.22563	2.20229	1.33391	2.30304	4.67477	2.53383	1.43605	1.4406	1.86829	2.55323	2.04645	3.43735	4.23314	3.5585	3.667	3.90033	4.94049	3.53663	3.74551	3.14312	1.09169	3.53364	1.81123	1.60826	0.129129
669	1.82445	0.789622	3.26186	3.13518	2.30045	2.70531	1.12488	1.48202	0.823222	1.16048	1.17779	0.738248	1.63514	1.66859	1.8501	2.34673	1.81734	1.73426	4.62524	2.05632	2.86875	1.5948	1.96939	1.798	3.06213	3.79717	3.22146	2.76037	4.97321	4.08577	4.87982	3.30581	3.70686	2.31324	3.05411	2.89413	2.00861	1.86357	1.52151
670	1.71562	0.834505	2.6461	3.2216	2.54692	1.22379	1.06572	1.52396	0.877887	1.25336	1.16084	0.82734	1.18225	1.82543	2.09459	2.45998	0.978852	2.28727	4.57067	1.80231	4.16735	1.09819	2.04562	2.58196	2.23113	4.3487	2.71801	1.72816	3.15434	3.97177	5.55347	3.81474	4.72505	2.9975	1.11618	3.56028	4.46407	2.22852	-0.104657
671	1.8863	0.41093	3.33088	3.10479	2.56015	3.06902	0.778153	1.68853	0.925007	1.2746	0.84459	0.976728	1.21137	1.79785	1.8918	2.8984	1.57407	1.84422	3.63361	2.25905	1.94525	1.62875	2.33598	1.49117	1.94408	4.0233	3.38903	3.48542	4.04071	4.50012	5.29965	2.52293	3.73292	0.604285	2.2278	3.67	3.76589	1.90987	1.12933
672	2.31353	0.828949	2.87611	3.16371	2.84358	2.61643	1.04542	1.56868	1.12216	1.47766	1.20073	1.02962	1.09781	2.36642	2.42732	2.97508	1.46473	2.42511	4.6371	1.95886	3.11075	1.67267	1.78908	2.07322	2.76424	4.13679	3.51746	2.77648	3.54346	4.58128	5.46281	3.75727	3.57473	1.77606	2.37436	2.45224	3.01282	0.719862	-0.0469439
673	1.81543	0.977233	3.00781	3.18607	2.72401	2.6215	1.2212	1.51734	1.01559	1.31135	1.18318	0.963284	1.46643	1.6604	1.88942	2.9336	1.67952	1.78162	3.78666	2.45066	2.64924	1.41017	2.10735	1.66653	2.6855	4.58716	3.29617	2.35065	3.88383	2.10844	5.86116	3.64838	3.50681	3.3262	3.62578	2.58268	2.43255	2.36879	1.38842
674	1.54638	0.561838	3.5763	3.40646	2.49203	1.7825	1.13327	1.37779	1.04598	0.507307	0.841202	1.05975	1.07457	1.57298	1.85185	2.46103	1.21848	2.1015	4.41929	1.6063	2.83605	1.40961	2.53984	2.12815	1.76073	3.64196	4.50656	3.65275	2.65872	3.50598	4.24196	4.38803	5.03748	3.32671	2.7031	3.70557	3.12515	2.00307	1.24861
675	1.81787	0.406712	3.20726	3.48822	2.9544	2.94148	1.0623	1.51826	1.09423	1.62161	1.27116	0.628622	1.02692	2.03774	2.18438	2.5991	1.04846	-12.115	4.60073	1.88416	2.34485	1.67097	2.27888	2.18668	2.33751	4.18699	4.48021	3.03384	2.9603	4.25613	6.06133	3.50238	3.6482	3.15174	3.29224	3.69387	2.78394	1.58225	0.050598
676	1.63306	0.286863	3.16727	3.28858	2.52596	1.93446	1.15628	1.81375	0.915387	1.25165	0.88419	1.19424	1.36614	2.2045	1.99894	2.35695	1.60825	2.3151	5.10144	1.57293	2.70548	1.06713	2.16775	2.45351	3.01654	3.55564	3.67046	3.06436	4.30458	3.35792	5.54552	2.94156	4.19055	1.17471	2.84188	3.33306	2.71217	2.32465	1.37085
677	1.73178	0.655315	3.2286	2.65556	2.75157	2.60962	1.18633	1.88272	1.22777	1.42139	0.889969	1.07958	0.817807	1.91294	1.93376	2.34322	1.88283	1.9386	4.92101	2.59953	3.37046	1.73724	1.89447	2.02278	2.42311	2.99364	4.68187	2.02928	2.868	3.46952	4.75355	2.07853	4.47632	3.42573	3.73577	2.66197	3.34931	1.90656	1.47356
678	2.04767	0.856098	2.95532	3.29183	2.51627	2.04757	1.06222	1.91097	1.43731	1.83886	0.414803	0.651717	1.04469	2.41909	2.01828	2.72663	1.63423	2.22549	4.99989	2.21385	2.717	1.7776	2.71135	1.79103	2.52741	3.1855	4.33184	2.70329	3.03151	3.79347	5.78948	3.7654	3.8161	4.17702	3.73072	4.08118	2.26843	1.80262	-0.0507906
679	1.99724	1.22352	3.31576	3.69378	2.57631	1.80623	1.15274	1.3671	1.02874	1.93408	1.27657	1.30692	1.16575	2.07536	2.27007	2.44018	1.48242	1.98129	5.36548	2.87025	2.58481	0.474693	2.29045	2.04526	2.42725	3.88346	4.04732	3.81657	3.38456	3.9058	6.59093	3.85734	4.07864	4.207	0.579749	4.33499	3.0454	0.114318	1.21918
680	1.65019	1.17549	3.91818	3.52694	3.00509	3.19967	1.01545	1.73292	1.20358	1.45473	0.938229	0.780795	1.01145	1.90776	2.10746	2.93715	1.59763	1.76008	4.3322	2.6874	3.7613	1.40275	2.62089	1.32039	2.05757	4.44548	4.19862	2.89319	3.84053	4.20976	4.54066	4.01155	4.50226	3.26504	3.61714	3.33612	3.42771	1.65383	1.39081
681	1.86468	0.634461	3.71429	3.41837	2.92422	3.31336	1.226	1.63402	1.08111	1.56056	1.04933	1.12197	1.41491	2.24024	2.52666	2.69724	1.83602	2.17771	4.03425	2.22551	4.27313	1.18728	1.83404	2.15046	2.304	3.77638	4.13393	2.23954	3.46255	4.89755	6.24027	1.81627	4.52047	1.43527	2.54969	3.30395	3.70216	1.21892	1.16637
682	1.69441	1.12118	3.57272	3.5783	2.46691	3.20791	1.03812	1.61242	1.2245	1.05885	0.913965	1.08966	1.1226	2.10344	2.04247	2.42744	1.43874	2.21548	4.53315	3.37648	2.09888	1.42407	1.76397	1.70953	1.92205	4.0728	3.52088	1.95456	3.83447	3.93733	5.61179	2.96637	4.04734	4.14066	2.85409	2.53379	2.83288	1.98576	-0.0852842
683	1.88444	1.30462	3.03026	3.52517	2.65064	2.48782	1.12437	1.80744	1.53221	1.34421	1.11366	1.04895	1.40613	2.25964	2.12286	2.70355	1.66158	2.24734	3.51496	2.7687	1.71938	0.821511	2.18147	2.36338	2.23144	3.71228	3.79296	2.22394	3.82764	2.73446	5.37755	3.25781	5.45651	2.92569	2.63237	3.61637	3.42539	1.96902	0.864429
684	1.8037	1.12611	2.94263	3.36666	3.15799	2.49418	1.15866	1.55715	1.46911	1.33829	1.1949	0.641027	1.37327	2.13808	1.74238	2.33477	1.26679	2.3427	4.86095	2.83641	3.10309	1.63303	2.41025	1.69161	3.03336	4.08066	3.91748	2.39074	3.41265	4.70009	5.22177	4.49052	4.15927	2.52526	2.97384	4.00429	3.54209	2.21554	0.885949
685	1.86754	0.728255	3.11008	3.48838	3.27386	2.17524	0.838248	1.67909	1.34064	1.09425	1.02246	0.960106	1.46035	1.77346	1.76197	2.42091	1.801	2.04961	3.68761	2.13775	3.72871	1.31691	1.8707	1.54169	2.04973	4.17924	3.63487	1.46727	2.9584	3.92146	5.93051	4.4718	4.00634	4.22203	3.86566	3.71197	3.17968	2.65672	0.239562
686	1.83873	0.953134	2.97352	3.46825	2.96254	2.26136	1.19444	1.80052	1.17915	1.50689	1.2122	1.09263	1.41016	2.27897	1.90987	2.79958	2.05412	2.01251	4.09283	1.57233	3.48671	1.09564	1.60241	1.49613	2.46172	2.7606	3.48348	1.70702	3.79396	4.58168	6.6601	4.37668	4.91186	4.16157	1.50651	3.33009	2.51028	2.16584	0.548858
687	2.14414	0.90548	3.51149	3.95495	3.08971	3.49747	1.08841	1.46465	1.05302	1.56451	0.901973	1.13467	1.06239	2.38536	2.17294	2.11422	1.63726	2.16162	3.54595	1.2993	2.36342	0.909284	2.16216	1.83178	2.70609	2.84193	3.07262	3.48537	3.6533	5.38316	6.00935	3.74568	4.03576	4.20693	0.713481	3.39481	2.77492	2.8107	-0.0111907
688	2.04223	0.953723	3.27597	3.69201	2.93434	3.10019	1.03366	1.63324	1.46881	1.20315	1.19581	1.18121	-0.936908	2.46421	2.02646	2.75486	1.49615	2.46134	4.41801	2.24017	3.2877	1.24409	2.504	1.40634	2.32399	4.04631	3.87234	1.4803	2.21121	4.19549	5.55509	3.58871	4.45982	3.91058	3.69076	3.24068	3.23883	2.87469	1.32695
689	1.59268	0.817317	3.47427	3.73187	3.43102	2.96655	1.29029	1.78273	1.4728	1.90745	1.16952	1.28164	-0.237982	2.48779	1.90782	2.53856	1.47956	2.2138	4.92839	2.28775	2.6503	1.5078	1.53693	2.50368	2.30195	3.60884	4.48834	3.55366	4.72811	4.51182	5.7361	4.23972	4.70024	2.48934	2.75972	4.18784	4.45247	1.6772	1.46462
690	2.05062	1.01466	3.35158	3.33181	3.03539	2.9681	1.28029	1.76068	1.13131	1.57421	1.33044	1.24202	-1.10775	2.41688	1.90228	2.46008	2.01639	2.37472	5.37055	2.28579	2.85062	1.78834	1.44488	1.74206	2.12108	4.23108	4.91415	-0.0435484	3.62538	4.60934	4.84352	4.74473	4.26985	4.05888	1.18175	3.02522	2.22968	1.87012	0.232104
691	1.74602	1.31544	3.14677	3.11888	3.21704	3.17914	1.0591	1.81627	1.34603	1.56151	1.32503	1.42102	1.4719	2.48102	2.02195	2.65994	1.37872	2.1023	3.67443	3.48314	3.09445	1.77169	2.22459	3.04189	1.91203	5.54061	4.28302	2.0035	3.09345	2.85618	6.64332	3.60592	4.27009	1.24653	3.05642	2.30288	3.58647	2.64517	0.973134
692	1.72612	1.32856	3.76151	3.94925	2.7719	2.31211	1.08219	1.6568	1.20219	1.32889	1.09278	1.13639	1.22186	2.33595	2.06168	2.90021	1.29547	2.35665	5.37008	3.27665	2.12479	1.27149	1.62493	1.71448	2.38661	3.70794	3.37693	2.98403	3.315	4.41616	5.52554	4.57891	5.03008	2.24884	2.03693	2.91128	2.88685	1.47595	2.38488
693	1.69077	0.918196	3.97002	3.85886	3.10794	2.35192	1.10949	1.74419	0.941074	1.74636	0.834045	1.36462	1.04984	2.61288	1.93188	2.32304	1.88801	2.2804	5.39791	3.52036	3.76183	1.14779	1.36856	2.22118	2.35202	4.56756	4.54046	2.93541	4.10812	5.15278	5.62753	4.11396	5.65541	2.98412	3.31634	2.47585	4.21301	2.47897	1.01632
694	1.88769	0.488344	3.92809	3.85898	2.89263	2.87469	1.28944	1.60922	1.40234	1.66093	1.02104	0.789352	1.1565	2.23237	2.16534	2.96235	1.68728	2.26819	4.44799	2.43006	3.9169	1.21545	1.67176	2.10343	3.40717	4.52952	4.3195	2.95	4.06729	5.77764	6.39147	4.83721	4.88314	-1.89669	2.74057	3.51864	2.75791	3.24975	1.22332
695	1.86712	-0.0259391	3.78133	3.89804	3.76636	3.02121	0.863391	1.87601	1.38454	1.33353	1.08831	1.22492	0.928836	2.65524	2.05973	2.43006	1.48477	2.17398	3.98541	2.07593	3.56888	1.89102	1.5812	1.55302	2.07752	4.76162	5.26919	2.72344	4.42293	4.33982	5.93569	3.90611	5.27846	3.93373	2.84288	1.9306	3.38962	3.03381	0.988094
696	1.62677	1.33853	3.65539	3.98891	3.32556	2.8253	0.986808	1.81532	1.26885	1.44487	0.914052	1.06441	1.36778	2.83194	1.89502	2.88709	1.53395	2.32996	4.28721	2.83685	3.48122	1.1642	1.56805	2.51708	2.79595	4.37375	4.17279	2.41147	3.3284	4.20508	5.55116	5.40759	5.0298	3.95295	2.29016	2.94366	3.12806	2.96763	1.38821
697	2.03409	1.52501	3.3356	3.675	3.44025	3.0378	0.881156	1.7745	1.04253	1.31993	1.31076	1.0581	1.18207	2.54634	2.37747	2.67016	1.8769	1.99493	5.39841	3.47287	3.09615	1.44721	2.57626	2.85257	2.75162	5.6019	4.50103	3.36344	4.09858	5.12389	6.10205	5.15416	5.35429	4.00834	1.83515	2.6067	3.84446	3.65177	1.60159
698	1.89462	0.603705	3.28123	4.01446	3.31563	1.23626	1.32795	1.52464	1.15635	1.78718	0.909524	1.45473	1.72668	2.63791	1.78359	3.24281	1.75596	2.25074	3.63023	1.90393	3.87857	0.5527	1.73456	1.71253	2.09642	4.11371	4.54048	2.31922	4.45167	4.60078	5.17391	4.58314	5.75231	4.50289	3.08669	2.03094	3.82315	1.82501	0.14725
699	1.71507	0.713219	3.44359	3.60457	3.56818	2.841	1.31394	1.64479	1.32156	1.76234	1.42778	1.39422	1.15344	2.03359	2.00353	2.99373	1.90291	1.70349	5.64345	3.50467	3.00434	1.0357	1.95825	2.12769	2.66448	5.36565	4.3998	3.19083	3.0397	5.02114	5.13078	4.121	5.60745	3.01855	3.14197	4.17558	3.75782	1.36622	1.27069
700	1.82056	0.845799	3.91177	3.56478	2.86787	3.04747	1.46958	1.81414	1.33822	0.90768	1.1023	1.44679	1.22125	2.12345	2.44569	3.55166	2.04476	2.18863	4.58197	3.40513	3.37264	1.98042	1.38723	1.6029	2.55526	4.02468	3.44911	2.79363	4.64566	5.5727	6.42466	4.20046	6.1181	2.68162	2.57935	3.5935	4.14626	0.807428	1.64681
701	1.63014	0.629944	3.9515	4.25203	3.20576	1.05996	1.19575	1.93385	1.14652	1.43362	1.37639	1.41802	0.474563	2.77472	2.25589	3.23302	1.60598	2.31519	4.21038	2.94566	3.32608	1.77965	1.69636	1.87475	1.86506	3.79513	4.99863	3.14184	3.52617	4.27462	5.61432	3.62588	5.62553	3.9816	3.68373	2.8256	2.37312	2.34473	-1.55323
702	1.63189	1.21675	4.12028	3.15059	3.49788	1.68163	1.27961	1.88618	1.07889	1.64283	0.608285	1.81405	1.2979	2.53836	2.34244	2.8985	1.93878	2.50473	4.38178	3.41897	3.97236	1.24223	2.3272	1.75602	2.57075	4.26985	4.9803	2.78415	3.85154	4.70611	5.96786	5.44976	5.22205	4.41482	2.3394	3.79284	3.16824	3.19108	2.17836
703	1.75395	0.968723	3.63618	3.25127	3.11741	3.24499	1.21288	2.13046	1.12156	1.67897	1.3786	1.04998	1.0432	2.70722	2.208	2.81896	1.07914	2.08246	4.54633	2.71082	2.97463	1.54969	2.50365	2.05095	2.87603	3.74713	4.3685	2.91299	3.12716	3.80534	5.5414	5.4073	5.28623	2.90267	3.3051	3.68278	3.04982	2.55504	0.771327
704	1.56174	1.22138	3.48175	4.08597	2.69888	2.30359	0.910591	1.97008	0.989486	1.16024	1.29017	1.44883	1.18856	2.54544	2.34669	3.43922	1.91892	1.84202	4.44893	1.4618	3.54024	0.904604	1.82033	2.38036	3.61725	5.81634	4.83612	2.94436	3.61285	4.28559	6.15501	3.86692	4.86772	2.80012	3.3877	2.3052	3.48257	1.98404	1.7469
705	1.45234	0.416607	3.49401	3.59652	2.9244	2.26335	1.03355	1.9479	1.21955	1.8489	1.24156	1.34336	0.986286	2.06297	1.85115	3.26628	1.50629	2.31221	5.16011	1.34222	3.56333	0.91543	2.2461	1.52173	2.5295	4.15328	4.50646	3.65871	3.64214	4.83417	6.0887	3.00949	5.50182	3.85801	3.52959	3.31258	4.98189	1.10048	1.31083
706	1.8999	1.04128	3.54852	3.20908	3.26579	3.29262	0.919	2.21951	1.48207	1.85408	1.28047	1.75821	1.38586	2.83681	2.38689	3.36387	1.50228	2.5104	4.6439	1.57929	3.63678	1.52339	1.50673	1.83261	2.57002	3.73089	4.74413	2.71923	4.50639	4.52522	6.08957	4.40089	6.06884	3.14626	1.54339	2.80007	3.21104	2.24154	0.949577
707	1.93742	0.936373	3.37374	3.26669	2.94491	3.10144	1.01497	2.06762	1.21704	1.51922	1.19889	1.13262	1.44543	2.60792	2.14685	3.04639	1.95688	2.57248	5.0961	3.41549	2.06743	1.41172	2.01758	1.82178	3.08992	4.02986	5.32334	3.50011	3.84668	3.76072	6.45326	4.4329	5.89887	-0.547166	2.36558	2.94904	2.42803	2.54648	0.068053
708	1.70129	1.11982	3.38354	3.87711	3.22959	2.05317	1.1829	1.47466	1.62689	1.72492	0.919009	1.14213	1.08511	2.58493	2.00338	3.32395	1.69942	1.95751	4.63336	3.16821	3.52608	1.32558	1.50898	1.63097	3.14574	5.29088	4.09542	2.85198	4.05043	4.80497	5.17531	4.20144	6.20488	4.63341	2.96716	3.72856	4.09452	1.47085	1.06566
709	2.23444	1.57743	3.27625	4.04542	2.92837	3.35934	1.27059	2.02105	1.19904	1.4512	1.10165	0.743177	1.54723	2.26585	2.11307	3.06847	1.72254	2.35929	4.65749	3.73884	3.92271	1.39528	2.20699	2.11158	3.30929	4.67622	4.30437	3.87988	3.95803	4.64826	5.70353	4.96169	5.67192	5.04494	2.36764	4.39013	3.73016	2.22105	0.020785
710	1.92085	0.845092	3.73696	3.72958	2.85949	3.37645	1.20672	1.91144	1.38448	1.59587	1.29168	1.46139	1.28296	2.50911	2.48984	3.13007	1.85199	1.58038	4.3654	2.21433	4.03242	1.38425	1.96352	1.65818	1.75617	4.66179	5.56531	2.04204	3.53341	4.36539	5.2937	4.48197	5.57603	3.70754	2.42585	2.78845	3.57427	1.11563	1.10952
711	2.01961	1.22664	1.9809	3.90628	2.86779	1.79993	1.17912	2.23642	1.19397	1.55627	1.20779	1.23143	1.14842	3.03722	2.4694	3.02004	0.847846	2.03995	4.83667	3.91288	3.80638	1.46157	0.505434	1.97218	2.87618	5.23058	5.08311	1.69533	3.84139	4.17556	6.16465	3.77523	5.58778	4.33349	3.1198	2.75886	2.90429	1.1401	1.73343
712	2.27913	0.652783	3.32039	4.01427	3.02559	3.59185	0.974543	1.80892	1.14306	1.61002	1.37426	0.920074	1.14664	2.63732	2.17064	3.34939	1.42428	2.15756	4.92001	3.61228	3.91808	1.12459	1.73777	2.22067	1.77503	5.02097	3.80098	3.9343	4.0005	5.07851	6.72914	3.71844	6.78613	4.36314	2.11873	3.2697	3.15783	2.33968	1.62492
713	1.63649	0.567438	3.0811	3.54346	2.81972	2.05379	0.851305	1.79148	1.38287	0.883426	0.70525	1.48829	1.00193	2.99113	2.76827	3.54864	2.09375	2.58821	4.41019	2.16898	4.7867	1.01249	1.48886	2.63891	2.5063	4.24364	5.45738	1.22742	3.75558	5.92253	4.74661	3.8724	5.82123	4.16832	2.55905	3.56186	4.3331	1.598	2.74593
714	2.40779	1.1444	3.88494	3.75092	3.41205	2.30277	1.19926	1.57218	0.975433	1.46676	1.35735	1.81893	0.795935	2.80345	2.74608	3.3748	2.15828	2.51266	4.6151	4.49527	1.15717	1.40886	1.84913	1.01604	2.71313	4.80055	4.44003	3.21015	3.5881	4.1465	5.69265	5.15226	4.44575	3.35922	3.2516	2.93034	4.45596	2.21444	0.532083
715	2.02096	1.14266	2.22895	3.55733	2.70515	2.0073	1.13574	1.74052	1.19859	1.76929	1.1741	1.23647	0.979157	2.81567	2.48822	3.13646	1.72843	2.12486	5.11018	1.88181	3.72388	1.31067	0.527589	1.96355	2.44589	4.28009	4.74017	2.39564	4.01424	5.57702	5.43428	3.76123	5.54126	-2.40781	3.58901	3.078	3.11485	1.13682	1.30053
716	1.96577	1.19016	3.23793	3.38246	3.52951	2.24594	1.3704	1.87219	1.20276	1.44628	1.04884	1.3631	1.3514	2.70293	2.5204	2.88509	1.76933	1.98935	4.03888	3.83251	3.08047	1.56896	1.81613	2.17554	2.58509	3.85906	4.27958	2.47857	3.814	3.75348	5.26086	4.40082	4.89878	3.08091	2.27941	3.63028	3.12391	2.08951	-0.282964
717	2.0673	1.22691	3.91144	3.59946	3.27339	3.37764	1.25162	2.05229	1.09184	0.634593	0.904658	1.48059	0.955521	2.70749	2.60404	3.15573	1.80421	2.34934	3.76516	2.92179	3.48058	1.13515	2.05336	2.22024	2.75646	5.1623	5.06759	3.09442	4.27264	5.31703	5.68371	3.94764	6.04016	3.22451	2.55095	3.03643	3.96466	2.17143	1.80109
718	1.98969	1.27996	3.58937	3.70257	3.10105	2.61405	0.979723	2.31525	1.18168	1.20925	0.432261	1.51884	1.36498	2.2427	2.40621	2.77051	1.42642	2.03484	4.72883	3.29671	2.91511	1.41014	1.96453	1.33712	2.67834	5.20606	5.49771	1.22571	2.29663	4.5165	5.67115	4.42407	6.02172	2.73381	2.15731	3.26564	3.5037	1.39141	0.107192
719	2.11664	1.28276	3.73202	3.91133	2.37451	2.37755	1.07122	2.0476	1.25511	1.30992	1.27069	1.34877	1.60861	3.03162	2.46169	3.303	1.87131	2.13008	4.10588	3.93844	3.42889	1.56486	1.6881	1.84587	3.09081	4.58055	4.38522	3.25459	4.36162	4.87502	5.44625	5.15416	6.07431	4.05271	3.12514	2.97466	3.2061	1.18636	0.80751
720	1.55095	1.12598	3.3206	3.82946	2.7884	2.27255	1.11775	2.22704	1.64679	1.4773	1.45597	1.62289	1.1681	3.02371	1.73017	2.98123	1.90059	1.32756	5.11165	3.75735	4.54307	1.48933	1.28501	1.93126	2.36009	3.68112	5.14608	2.77224	3.44639	5.26024	6.83062	5.90699	6.38247	4.05847	2.59247	3.25744	2.43713	1.59874	1.04841
721	2.47381	1.25552	3.75887	3.68058	2.91963	2.78379	1.16494	1.94305	1.37477	1.67842	1.57706	1.66207	1.47258	3.03658	2.15921	3.03331	1.90573	2.27691	4.15166	2.58348	2.10502	1.9582	1.6104	1.8763	2.89957	4.25214	4.34272	2.14886	3.93499	5.12851	6.54607	5.57517	6.36655	2.97672	3.56935	3.26534	2.11967	1.43185	-0.283322
722	2.29983	1.51254	3.46112	3.84984	2.7048	3.19162	1.07257	2.05937	1.02727	1.54391	0.922237	1.32542	0.596476	2.85604	2.10026	2.38385	2.08052	0.698307	4.71243	3.02654	2.79053	1.29056	1.79122	2.03745	2.88578	5.19326	5.24632	2.68705	4.27728	4.4916	6.86085	3.99779	5.52844	4.35204	2.55308	3.90571	3.11321	2.49459	1.91954
723	2.66141	0.611351	3.94189	4.05166	2.63298	2.7775	0.919556	1.8025	1.38472	1.85594	1.3632	1.45705	1.8186	2.9585	2.09648	2.93636	1.95441	2.22565	5.29109	3.10694	3.23129	0.949865	2.29198	2.29976	2.65552	5.34881	5.63753	1.83807	4.41647	6.51445	5.75072	4.81386	4.90839	4.60856	1.66727	1.58917	3.18301	2.96685	1.16198
724	1.78548	0.94458	3.20446	3.86733	2.51689	2.4701	1.07015	2.21396	1.03453	1.67408	1.14512	1.29905	1.47288	2.84602	2.7454	2.75615	1.42265	2.38997	3.90024	4.03791	2.98345	0.766185	1.74581	2.30096	2.88493	5.27387	4.19871	2.75944	4.02986	2.53983	6.60247	5.45744	5.31984	0.00535324	3.29469	2.93131	1.93169	2.29525	0.904101
725	2.39082	1.35396	3.22667	4.00738	2.47954	3.38592	0.870104	2.11944	1.00367	1.8069	0.847562	1.62763	1.21517	2.4632	2.09296	2.31391	1.35681	2.06441	3.76239	3.05017	2.0549	1.44682	1.8732	1.91073	2.66412	4.67001	5.0733	2.73785	4.88703	5.98948	5.64083	5.75847	5.26829	4.81173	2.31258	2.84312	2.69459	0.950252	1.23122
726	2.38957	0.995278	3.59011	3.7088	2.80747	3.07822	1.2222	2.07814	1.40902	1.52863	1.15828	1.89054	1.773	2.84667	2.47072	2.41597	1.73798	2.50519	4.0345	2.27525	2.14102	0.686366	1.90541	1.6924	3.73965	4.6528	5.24391	2.71741	2.95911	6.39629	6.61308	4.59849	4.72926	6.23689	3.42989	4.21498	1.58349	2.00888	1.4875
727	2.04776	1.60862	3.38589	3.20665	2.57636	3.44893	1.13148	1.96378	1.57853	1.98949	1.16127	1.70533	1.66322	2.96488	2.39708	2.44829	1.55769	2.58606	4.48873	3.53039	3.47386	1.03439	2.35652	2.72631	2.88504	4.10649	4.82636	3.14433	4.07499	5.88396	5.67759	3.16224	5.65503	4.43227	3.30542	3.10797	3.51567	3.33959	-0.0840832
728	1.85489	0.941801	3.54779	3.71912	2.69928	3.10537	1.19673	2.03438	1.30578	1.64906	0.9619	1.47989	1.4393	2.87914	2.59197	3.00236	1.57183	2.46851	4.96565	2.73201	2.65571	0.888349	2.04367	1.84818	2.21916	4.67512	4.23301	1.53072	3.72387	4.92495	5.30991	4.96421	6.19059	4.73263	3.77807	3.57306	3.1312	1.12494	1.14157
729	1.87817	0.688472	3.84756	3.6212	2.90803	2.70423	0.950577	2.17238	1.04734	1.765	0.565991	1.19313	0.355653	2.64691	2.40192	2.46565	1.57028	1.78051	4.58126	1.07648	4.32981	1.79755	1.80174	1.73572	2.71362	4.23168	4.14455	3.43372	4.08069	5.04853	5.98684	5.25682	6.06372	0.190261	2.74897	3.50338	2.85519	1.28073	1.25381
730	2.07578	1.109	3.35678	3.67651	2.86629	3.20962	1.13859	2.0823	1.16997	1.76225	0.993681	1.6113	1.03994	2.5001	2.53663	2.79053	1.99229	2.13455	3.07229	3.08038	1.41137	0.923588	1.45142	2.36468	2.3853	5.43859	4.41804	3.09853	4.90503	5.41829	6.69485	5.52339	5.19238	5.73004	2.27401	3.41096	3.89715	2.76769	0.206145
731	2.41015	0.869615	3.40329	4.11104	2.79112	2.72289	1.11251	1.91517	1.36398	1.4725	1.39318	1.43636	1.19235	2.46002	2.41527	2.77631	1.723	1.83955	4.75206	2.6257	4.90439	0.402425	2.35702	2.64448	2.34807	4.30809	4.21342	2.9673	3.00624	5.1358	6.96493	4.89657	5.83606	4.59461	2.80576	3.33892	3.44499	1.76321	0.638559
732	2.31645	0.768693	4.06781	3.75982	3.09693	3.39182	1.26022	2.27146	1.46794	1.39277	1.09145	1.62883	0.999338	2.79234	2.85969	2.82509	1.89756	2.41755	2.98978	2.90983	3.20321	0.716833	2.0633	1.45967	2.7049	4.80908	4.19913	2.27922	4.99497	5.29684	6.34505	5.02755	6.06793	3.36202	3.85663	3.40249	2.72341	2.1258	0.642304
733	2.05224	1.35713	3.9304	3.71215	3.00106	2.78081	1.08292	1.96229	1.36117	1.57444	0.974495	1.44122	0.966252	2.83314	2.29401	2.5986	1.2885	2.36152	3.51602	2.94223	4.39352	0.818141	0.958979	1.47934	2.28038	5.2263	5.92778	2.59464	3.53956	6.2813	6.93383	5.99825	5.17602	3.87466	3.07074	3.51803	2.31835	2.27949	1.54717
734	1.96143	1.46075	3.12823	3.42459	2.45222	2.85027	1.29304	2.14081	1.05823	1.52876	0.87238	1.51042	1.38371	2.95035	2.33895	2.68582	1.78857	2.90179	4.14775	3.14332	4.57952	1.20071	2.7472	1.78566	2.5123	4.36204	4.64676	3.22219	4.06858	5.53645	7.84804	4.74347	5.29761	4.09031	4.05514	3.87858	3.31991	2.81324	0.190603
735	2.16563	0.924342	3.79909	3.73202	3.07735	3.39812	1.08701	1.96773	1.27655	1.66714	1.20976	1.46871	1.27134	2.2437	2.13835	2.47152	1.4366	2.34306	3.69918	1.30507	3.11489	0.838068	1.83096	1.95244	2.8841	4.65684	5.09481	2.21495	4.42135	5.34357	6.67197	5.5733	5.29382	5.02745	1.02852	2.34149	2.6456	2.35712	1.1082
736	1.9588	1.33538	3.77031	3.86664	3.19727	3.34501	1.14371	2.30596	1.31089	1.54285	1.2426	1.32423	1.09945	2.96795	2.4677	2.45198	1.30115	2.68858	4.02556	3.65972	4.4866	0.470156	2.43294	1.23453	2.69283	5.20983	4.38041	1.40991	5.18606	5.11535	7.6118	4.99599	5.4693	6.12808	3.43417	4.20247	3.53228	0.927596	1.95008
737	2.11164	1.1807	3.28468	3.71838	2.53115	2.97798	0.90302	2.0767	1.33396	1.67822	1.13962	1.34832	1.333	3.11367	2.53822	2.63431	1.53026	2.59024	3.55664	3.94726	3.3133	1.02231	2.45312	2.17817	3.47498	5.5643	5.22703	2.22911	5.49374	5.27295	6.98746	4.98602	5.17473	4.5264	2.94938	3.39868	3.68352	1.31404	0.50222
738	1.97398	0.310296	3.69913	4.20559	2.66272	3.12258	1.05551	2.11089	1.08019	0.708103	0.731296	1.38448	1.25879	2.83017	2.46411	2.29739	1.72061	2.57516	4.63775	3.25239	4.16773	1.64106	1.64187	2.57709	2.56117	5.43297	5.12367	1.74265	4.60377	5.30773	6.90773	4.53691	4.33226	4.08517	0.451167	4.62443	2.77605	1.34814	-0.750753
739	2.17161	1.07833	3.27317	3.34787	2.83924	3.02587	1.054	2.09705	1.32108	1.8368	1.17607	1.46751	1.06741	2.87613	2.44168	2.67669	1.47843	2.04494	4.96059	3.23394	4.09774	1.8296	1.5433	1.98437	2.62023	5.35692	4.44839	2.53877	4.47717	6.57082	6.90882	4.55121	5.56084	4.72738	2.4894	5.22897	4.21659	2.63578	1.54932
740	2.07969	0.774976	3.90522	3.50802	2.91262	3.0231	0.922733	2.07525	1.23284	1.53312	0.924447	1.48235	1.43713	3.24018	2.36639	2.62429	1.91925	2.30477	3.87328	2.98639	3.71224	0.327052	1.40121	1.81853	3.65643	4.90129	4.17188	2.01293	3.63265	6.19272	7.08299	3.87505	6.08956	4.12641	2.59271	3.975	3.02094	1.96723	1.64398
741	2.18541	1.10759	3.58122	3.51077	2.92207	3.10992	1.02665	1.57901	1.43877	1.69873	1.13285	1.53987	0.976786	2.65739	2.22017	2.44591	2.06196	2.24972	3.89544	3.18912	5.03451	1.38054	1.34703	1.86493	1.4931	4.62212	5.62245	2.28152	4.72534	5.48425	7.70916	4.56196	5.54069	4.97835	3.19364	2.90273	3.63518	1.39201	0.708914
742	1.72859	1.69854	4.19587	3.92981	2.95168	1.184	1.11377	2.00882	1.24843	2.16281	1.08192	1.29641	1.32297	2.9355	2.87514	2.59921	1.76201	2.07916	4.1934	3.0317	4.66511	1.05729	2.21005	2.09694	3.06209	5.24007	5.05503	2.65712	4.58467	6.70737	6.93489	5.02494	5.88663	5.43943	0.825208	3.39354	3.29953	2.23974	1.35042
743	2.12597	1.50225	3.60507	3.50732	3.0933	1.63856	1.16498	1.63305	1.28282	1.25448	1.38384	1.54251	1.05011	2.85329	2.24624	3.14414	1.5737	2.02826	5.59089	2.49028	5.30973	0.8515	2.15205	1.97041	2.62491	5.24279	4.93452	1.30849	4.04413	6.57344	7.20297	3.95026	5.83146	4.48436	2.88012	4.16793	3.03515	1.98106	0.673565
744	1.54239	1.44501	4.12116	3.20493	2.86138	1.50072	1.01129	1.87084	0.972442	1.62391	0.853309	1.69914	1.31132	2.70732	2.44219	2.76303	2.00542	2.27	3.37216	2.47036	5.0963	1.23657	1.67648	2.25235	3.2808	4.29817	5.19795	2.74192	3.58855	5.70331	8.28651	5.13633	6.13479	3.65432	2.69371	2.89309	2.84921	2.68478	1.71544
745	1.97824	1.07177	3.56616	3.59259	3.05313	2.90758	1.05595	2.16985	0.955608	1.84524	1.39132	1.40192	1.63759	2.71068	2.41645	3.04839	1.90779	2.48811	3.69774	1.92015	2.8696	1.24139	2.68431	2.16432	3.4526	4.63025	4.74277	2.45186	4.96573	2.90441	8.70403	4.07448	6.14014	5.10102	3.55521	3.57802	3.87318	2.32781	1.77779
746	2.15137	1.26692	3.28959	3.05924	2.40938	3.01062	1.08281	1.99826	1.2608	1.51923	1.2001	1.36301	1.45487	2.43767	2.2708	2.50914	1.45724	2.50934	3.65527	3.09705	3.61193	1.51174	2.40473	1.26545	3.07985	5.16205	5.64408	2.91306	3.99773	5.72638	7.14391	4.27757	6.13835	5.154	2.20482	3.64124	2.78932	2.58061	-1.36007
747	2.03592	1.47649	3.47975	3.68186	2.93423	3.27573	1.03128	1.92824	1.22321	1.99657	0.99034	1.36918	1.28593	2.78803	2.46443	2.54481	1.50605	2.28407	4.40943	2.84657	5.01042	1.3183	2.42547	2.49067	2.66969	5.38791	5.50196	2.99985	4.55889	6.41311	7.04693	4.32534	5.17643	4.91746	3.15775	2.40675	2.87393	3.0843	1.64404
748	1.83797	0.350667	2.76725	3.75808	2.56497	1.88647	1.13352	1.90927	1.43442	1.58115	0.942561	1.59238	0.70365	2.84332	2.02362	2.46519	2.12425	2.37194	3.95978	3.26266	4.00098	1.77401	2.05653	1.03412	2.73125	4.9353	5.65097	2.34222	4.00775	6.50599	6.95731	5.36622	4.21436	5.94863	5.20351	3.52934	2.50593	1.28748	0.759324
749	2.07707	1.38582	3.75426	3.77605	2.44501	2.92874	1.01063	2.02519	1.42832	1.75959	1.27803	1.70182	1.17555	2.86112	2.396	2.01992	1.5744	2.15427	4.51192	2.76043	4.98951	1.35445	2.0432	2.57625	2.90313	5.02772	4.28428	2.56923	5.06352	6.41916	7.54058	4.6592	4.37926	2.55798	2.69215	3.29692	2.65336	1.37714	-0.0389686
750	2.31438	1.1869	3.3114	3.52563	2.34282	2.91435	1.11175	2.0622	1.24333	1.6283	0.933841	1.3887	1.46033	2.48821	2.00793	3.22392	1.84361	2.25347	4.60863	2.82755	4.74564	0.624455	2.19754	0.956484	2.25488	4.73033	5.60062	1.65156	3.83252	6.01984	7.82123	2.51503	4.89035	5.86809	2.72909	3.3082	1.86589	2.1281	1.39448
751	2.18002	1.4938	3.57231	3.14304	2.66775	2.13534	1.00726	1.95712	1.50212	1.54404	1.24023	1.36287	1.34769	2.77221	2.51241	2.447	2.52115	2.09734	4.31229	2.61501	5.15605	1.31766	2.23776	1.01957	2.8876	5.05577	4.44469	2.62025	4.5063	6.8555	7.44018	3.91937	4.70433	4.46384	2.98304	3.65483	2.75894	1.87789	1.06484
752	2.23335	1.10578	3.95856	3.99787	2.32439	3.16238	1.18958	2.00272	1.49016	1.48235	1.46407	1.72067	1.51455	3.50502	2.1257	2.98782	2.15922	2.25399	4.3154	3.34515	3.84362	0.642729	2.25293	1.90699	2.78528	4.81387	5.15908	3.53403	5.11516	6.20087	7.13659	5.20511	6.18462	0.903978	3.34403	2.41887	2.8019	2.58113	2.21211
753	1.88355	0.843724	3.21104	3.51531	2.67151	3.1334	1.07508	2.00468	1.43304	1.60002	0.982264	1.42455	1.32144	3.32784	2.53815	2.71367	2.34459	2.34697	4.33339	2.63943	4.61337	1.58785	1.97705	1.71155	3.20974	4.80168	6.1968	2.45481	4.07063	6.58317	7.43626	4.55204	5.28487	5.75141	3.38255	3.81809	1.95832	2.30907	1.56524
754	2.21418	1.27702	3.66544	3.61243	2.87464	2.85898	1.1483	1.84536	1.47397	1.88099	0.940917	1.44637	1.20971	3.36565	2.15671	2.49353	2.06618	2.26695	4.18786	2.61227	5.72459	2.08444	2.44605	1.20652	2.75109	4.48975	5.10824	3.01061	3.47009	6.4036	7.34466	4.31269	6.0337	1.54064	2.90416	3.44982	3.07435	2.36196	1.01167
755	1.51952	0.816778	3.45608	3.22474	2.48759	3.15343	1.02354	2.17329	1.32397	1.42841	0.764752	1.56673	1.33845	2.31218	2.30948	2.29546	1.73248	2.44537	4.97057	3.01357	4.37556	1.20028	2.15873	2.64385	2.72873	6.0566	5.27718	3.27461	4.77432	7.00092	7.63542	5.63871	6.14069	5.12937	3.22117	3.52323	2.52424	2.03809	1.29822
756	1.74598	1.63389	3.63409	3.28632	2.98411	3.32084	1.05945	2.06817	1.45801	1.3636	1.10751	1.83511	1.2904	2.59253	1.99475	2.64451	2.292	2.8288	5.00315	3.761	4.9735	1.0032	1.52404	2.07259	1.97521	5.39738	4.36719	2.7513	4.05672	5.8988	7.51304	4.23478	5.30041	3.21383	3.1927	3.46401	2.58983	1.13692	0.403648
757	1.73532	0.951665	4.59116	3.66977	2.6228	3.46129	0.862273	1.65833	1.23652	1.37844	1.11616	1.17948	1.31582	3.20884	2.58093	2.03155	1.32704	2.12167	4.90285	2.79683	4.64123	0.875565	1.86485	2.29603	2.45799	5.39161	6.31068	3.23663	4.32605	6.92403	7.19374	5.63748	5.22764	2.59737	1.96388	4.92905	2.55018	-0.232195	0.510331
758	2.09834	1.03576	3.82931	3.35447	2.31386	2.50898	1.11361	1.78828	1.34032	1.6557	0.942752	1.68424	1.04643	2.62978	2.31254	2.56646	2.22943	2.02031	3.75161	2.07797	4.49012	1.17316	1.16336	2.57994	2.2029	4.50466	5.74221	3.26372	4.42904	4.53901	6.80357	4.60876	4.57224	4.91187	3.18619	3.41661	2.48273	3.03654	0.702339
759	1.97866	1.16899	4.20382	3.62556	2.39361	3.45566	0.923482	1.84032	1.26234	1.71182	1.68406	1.27958	1.16364	2.8195	1.90546	2.19454	1.27893	2.69824	4.74685	3.51421	4.85188	0.926009	2.40575	1.79236	1.65732	5.06478	5.08576	1.86242	3.77254	6.168	6.959	5.37563	5.20121	5.60817	4.13761	3.02752	2.3147	3.43166	0.348254
760	2.23014	1.27671	3.52498	3.54852	2.76257	3.08006	1.18978	2.21495	1.35111	1.81919	1.33248	1.16083	1.1692	2.41483	2.30209	2.27348	1.53329	2.68209	4.89646	3.44156	3.1894	1.02292	1.80528	2.1989	2.99196	5.12481	4.26235	2.15003	3.91169	6.87746	8.05965	2.90139	4.15891	5.5288	3.72973	4.79858	2.72786	1.58847	0.624506
761	1.68087	0.742974	3.25488	3.14837	2.39982	3.43835	0.858426	2.12643	1.19104	1.40001	0.893016	1.25855	1.49437	3.01728	2.45731	2.66012	1.90847	2.33649	4.25532	2.88462	4.1625	0.959466	1.88365	2.28322	2.56094	4.86926	4.95212	3.22748	4.85944	7.0876	7.62679	4.76544	6.34842	5.43676	4.12732	3.42086	2.96388	2.30147	1.40286
762	1.55872	1.12404	2.90481	3.18167	2.5524	3.59524	1.15436	2.02025	1.50471	1.5461	0.974514	1.81317	1.32524	2.62952	2.0526	2.66461	2.04021	2.13386	5.15984	2.76826	2.91404	1.64916	1.7133	2.52778	2.32497	5.21425	5.8185	2.60647	4.1372	6.38633	8.18584	4.95862	6.31187	3.87492	3.32691	3.7415	2.5826	2.29137	1.23901
763	1.69478	1.18727	3.6081	3.02851	2.17942	2.62383	1.04622	2.28092	1.38228	1.26445	1.09173	1.49375	0.926994	2.94246	2.33018	2.33612	2.2791	2.3505	4.12109	3.97651	3.37443	1.38138	1.90566	1.76446	2.57067	4.84418	6.2483	2.42392	4.02438	6.7124	8.34949	5.39863	5.88903	2.15415	3.09921	4.56231	1.36985	1.74769	2.5964
764	2.37452	0.979579	3.94827	3.12444	2.74466	3.34865	1.01415	2.23272	1.02094	1.52825	1.23194	1.38704	1.19017	3.21754	2.03378	2.68861	1.76981	2.51452	4.10404	3.26637	4.16934	1.235	1.26379	1.09614	2.9283	4.99877	4.95262	3.00984	4.14133	6.67435	7.19979	3.53575	6.00905	3.6681	4.08889	4.37896	3.10468	2.50911	2.19515
765	1.67262	0.845391	3.22411	3.66069	2.08517	3.56358	0.921774	2.02494	1.07968	1.16995	1.11612	1.46722	1.11765	2.52945	2.19965	2.40246	2.21389	2.75056	4.38291	2.50861	2.73154	1.2905	1.52766	1.64094	2.80229	3.91876	4.87734	3.11924	4.15282	6.94967	8.23643	4.98318	4.91654	4.4292	3.27624	3.34953	2.9881	2.16522	0.016635
766	1.91973	1.13221	2.81485	3.25601	2.28671	3.3468	1.18333	2.16323	1.45326	1.47215	1.03993	1.0346	1.31983	2.7781	2.30713	2.29975	1.52158	2.85764	3.80857	2.439	3.33394	1.70129	2.39637	1.75271	3.13511	5.24542	5.49158	3.08623	5.01878	7.32072	7.5266	4.40492	4.96167	4.50294	2.7968	3.45236	2.56126	1.73662	0.901602
767	1.7403	0.830029	3.09427	3.03294	2.42925	2.69756	0.613419	1.77529	1.33922	1.41296	1.03174	1.55072	1.12846	3.20867	2.29663	2.57701	1.81771	2.07391	4.06343	3.50724	4.80795	1.16273	2.11881	2.62241	2.73872	4.28382	5.42888	2.45712	4.35409	6.9455	7.8355	4.35965	5.90802	5.37485	3.4933	3.67356	2.51837	1.07591	1.50759
768	2.25657	0.683393	3.67835	3.25263	2.2499	3.10062	1.33578	1.77076	1.29499	1.30449	1.08358	1.37683	1.66092	3.01244	2.37981	2.819	1.83534	2.72924	4.78947	3.21422	4.55963	1.57241	2.37979	3.17483	3.23763	5.94412	5.71558	2.81204	4.61539	6.61294	7.00006	5.31691	4.52047	3.59094	4.0781	4.04398	2.08959	1.49615	2.30995
769	1.2828	0.901556	2.28199	3.10743	2.29086	3.22822	1.06321	2.16242	1.43354	1.31326	1.24093	1.46228	1.23901	3.31713	2.57086	2.55828	2.07344	2.38841	4.62139	3.01142	4.51868	0.363983	2.05603	2.00538	2.21988	4.80969	5.0407	1.988	3.83524	5.49309	7.17848	5.50988	5.9739	3.03186	3.5223	3.97947	2.44121	2.2978	1.41029
770	1.88691	1.1037	3.07961	3.59974	2.52744	3.81886	1.11823	2.17868	1.70632	1.67211	1.30451	1.46199	0.904164	2.52792	2.07198	2.65794	2.03116	1.99649	4.43169	2.96905	2.89612	1.99181	2.83955	2.2157	3.15154	4.914	5.58124	3.31681	3.96593	6.42944	7.55782	4.36193	5.38627	0.548866	3.8602	4.17963	2.33461	0.641229	1.81546
771	2.04905	0.953896	3.55301	3.40247	2.94649	2.96479	1.05203	2.41743	1.5318	1.8467	1.01503	1.42622	1.71305	2.94738	2.20125	2.39383	1.45331	2.48509	3.97668	3.16502	5.4913	1.50028	0.897447	1.66029	2.71246	4.66555	5.64145	3.6384	4.49983	6.43144	7.8747	5.54379	5.23702	0.410674	4.01389	3.35162	3.16365	2.05882	1.92457
772	2.05665	1.00565	3.27678	3.26035	2.51982	3.51482	1.16175	2.2444	1.18064	1.51376	1.37714	1.20105	1.4801	3.32998	2.2079	2.68209	1.8924	2.19918	5.55596	2.65248	3.10504	1.38523	2.28552	2.68076	3.27226	4.99497	5.04551	2.78491	4.73858	6.28774	8.60097	5.33946	5.53664	4.53454	3.12827	3.9144	1.79427	1.13335	1.08694
773	1.94579	1.01589	3.96293	3.33883	2.39958	3.07442	1.39903	2.03294	1.66082	1.60895	1.10384	1.30882	1.57221	3.11708	2.09593	2.55138	2.14157	2.73353	2.93216	4.37757	3.75372	1.0809	1.78484	2.3917	3.27267	4.64946	5.67196	2.52053	4.69241	6.60123	7.17818	5.60762	4.81942	5.61967	3.66599	4.6309	2.79073	2.21556	1.78962
774	1.51993	0.75874	3.71481	3.66763	2.0247	2.95739	1.29428	2.1562	1.29071	1.53146	1.27921	1.28753	0.70385	2.77323	2.4473	3.03449	1.97447	2.8667	3.97604	4.54346	3.47907	1.58102	1.7032	2.10097	2.63607	5.02059	5.51322	3.00469	4.56155	7.54818	7.56482	5.80162	5.27877	5.01841	3.71272	4.13377	3.20645	0.979847	2.96906
775	2.56281	1.1138	3.91562	3.36565	2.24452	3.118	1.12623	2.31454	1.35026	1.56774	1.15567	0.885016	1.36259	2.91713	2.02172	2.8089	1.80059	2.64702	4.34883	3.1516	2.08732	1.42901	1.16711	2.02796	1.91655	4.61323	5.12563	2.7847	3.45184	4.83481	7.08703	4.02194	4.62458	5.2308	1.9654	4.52471	2.23199	2.62391	0.785956
776	1.97108	1.21376	3.65003	3.2496	2.7309	3.21605	1.3301	1.78517	1.30351	1.71819	1.07856	1.31981	1.56129	2.64523	2.46062	1.99366	1.56792	2.61914	3.98931	3.00051	5.90702	0.83802	2.19137	2.48009	2.66793	5.27225	4.88242	2.43435	3.7088	6.64739	6.55432	4.69396	5.65464	1.78487	2.96162	4.44484	3.13285	1.56537	1.39906
777	1.92242	0.836379	3.36306	3.4692	2.00425	2.82365	1.28069	1.73151	1.19239	1.51751	1.13695	1.34458	1.5149	2.70184	2.27783	2.636	1.42829	2.85371	4.57053	3.2891	3.79393	1.45769	1.62444	2.12804	2.31088	5.27718	4.78463	2.39272	5.66141	7.44639	7.18141	4.99603	5.53434	5.35617	4.43253	2.29682	3.06891	2.4706	2.65058
778	2.10496	1.33279	3.51144	3.79465	2.46023	3.41417	1.03267	1.63441	1.36453	1.65014	1.10648	1.38536	1.50332	2.37242	2.12221	2.33215	1.56107	2.63238	3.25515	2.76761	3.21116	2.07061	1.67484	2.30238	2.18366	5.35249	5.22149	3.49903	4.55267	6.92639	7.81432	4.76025	4.80488	4.6625	3.02784	3.56743	1.98813	2.12924	1.32786
779	2.09096	1.09692	3.89163	3.37958	2.11066	2.85	1.06307	2.11046	1.26012	1.36664	1.20089	1.43362	1.35804	2.65768	2.14654	2.40099	1.51884	2.78767	3.44437	2.84326	4.88554	1.20717	2.55638	2.09005	3.04782	4.96964	5.86504	2.35478	4.50822	6.24866	6.21738	6.36923	5.18697	3.95517	3.55278	2.83896	2.34273	2.55995	1.53866
780	2.33823	0.661545	4.0839	3.69604	2.72784	3.19677	1.22643	1.96292	1.39879	1.52389	1.2618	1.04786	1.22239	2.52869	2.34414	2.66865	1.83275	2.63263	3.19265	3.70283	5.19654	1.52012	0.957492	2.32149	2.74839	4.00262	6.01318	3.30324	4.67201	6.19796	7.95285	5.76167	5.73614	3.57065	3.28398	3.9203	2.71623	1.83447	1.68114
781	1.88636	0.304212	3.54947	3.58244	2.32876	3.17468	0.844297	1.75548	1.32467	1.39547	0.952624	1.08216	1.23594	2.94336	2.46003	2.63136	1.73709	2.56606	4.57608	2.93893	4.1937	1.36595	1.9983	2.39197	2.861	5.36387	5.68535	2.92417	4.57305	7.86097	7.93066	5.99041	4.53282	3.07079	3.72313	4.31636	3.02451	2.65571	1.40576
782	1.85742	1.05773	4.24031	3.55556	1.97487	4.01682	0.908376	1.87597	1.23025	1.68581	0.397726	1.14866	1.20606	3.09703	2.08545	2.24797	2.17015	2.73409	4.90284	3.44858	3.44739	1.23399	1.11208	1.51652	3.75141	5.45928	5.47256	2.91975	3.44015	6.46514	8.28822	4.65014	6.24467	4.6266	3.80556	3.40809	3.42657	1.43357	1.34569
783	1.93771	1.15958	4.07026	3.68591	2.2273	3.17759	0.94948	2.38495	1.39012	1.85323	1.19029	1.49169	1.37184	2.83915	2.12275	2.87356	1.34796	2.75587	3.82435	3.3729	3.06884	1.93098	1.71302	2.07477	2.63287	5.63045	4.90005	3.69741	4.15334	7.89299	8.38033	5.64654	4.39913	6.05147	4.13846	2.75085	2.59073	1.0003	1.0153
784	1.9929	1.25547	3.23855	3.15535	2.20477	3.00365	1.28738	1.65947	1.07453	1.55438	1.19597	1.63704	1.42672	3.36728	2.42566	2.14859	2.24898	2.4864	3.3647	4.58917	4.75452	1.35307	2.40445	2.44251	2.27852	4.71061	5.38457	3.12274	4.18258	7.21625	7.81517	5.44744	5.81091	5.35836	3.35164	3.5917	2.38347	1.87933	2.18225
785	1.76019	0.773305	3.62191	3.96492	2.43271	3.51721	1.11399	1.92078	1.31274	1.60676	0.569369	1.53507	1.52992	2.61419	2.28811	2.94558	1.66329	2.50879	4.33892	2.76871	4.5012	2.12235	1.95639	3.01928	2.4289	5.13244	5.25935	3.43273	4.02021	7.44539	8.01765	4.466	4.49198	0.819744	3.20704	2.53916	2.40362	2.08767	2.67362
786	2.1703	1.08667	3.3285	3.5201	1.96744	2.81071	1.04091	2.19906	1.33288	1.41822	1.25578	1.57068	1.37986	3.22747	2.12458	2.9307	1.72086	2.40842	2.76623	4.59195	3.53239	1.22293	1.53436	1.87323	2.49142	4.31066	5.70411	1.83957	5.25501	6.29105	8.38163	4.92472	5.53371	4.96884	2.09352	3.5059	2.64137	1.42194	1.19892
787	2.04009	1.00396	3.9068	3.65256	2.25749	3.49282	1.38375	2.29106	1.31839	1.01524	1.17784	1.69679	1.02534	3.27084	2.40157	3.24376	1.92738	2.58907	3.72685	3.37921	4.47137	1.39926	2.44613	1.75295	2.36526	4.66194	5.53505	1.95572	4.89153	7.11227	7.1791	5.44406	5.88173	0.470619	2.95121	3.34403	3.71729	2.12696	1.9076
788	2.13062	1.24413	3.7816	3.69815	2.13669	3.45294	1.19512	1.70523	1.35606	1.69548	1.10888	1.01659	1.16306	2.87532	2.23906	2.86005	1.79888	2.31165	4.47613	3.16561	4.63149	2.25595	1.39546	2.85055	2.56396	5.26506	4.64233	3.11441	3.16097	6.50312	7.68357	5.21372	5.96391	4.57795	3.51897	2.53387	3.81099	2.42159	1.97142
789	1.52614	1.0091	3.7251	3.57647	2.25596	3.56561	1.25731	1.95349	1.21919	1.40234	0.960897	1.15101	1.47887	3.1882	2.1868	2.67528	1.89176	2.50749	3.79984	3.387	3.32702	2.13299	2.1862	2.04845	2.12548	4.88876	5.09692	2.83542	4.51382	5.40972	7.82515	5.9611	6.26435	5.31187	3.55776	4.95259	2.11928	0.696904	0.955169
790	1.7444	0.795491	3.8308	3.53857	2.11695	3.44278	1.42258	2.38657	1.13059	1.79124	1.25488	1.06891	1.65337	2.85788	1.94566	2.56499	1.85713	2.5794	4.25527	4.14809	3.72068	2.31671	1.77919	2.09762	2.39411	4.8154	5.41686	2.69012	4.89208	6.96959	6.63978	6.29946	5.2002	3.74862	3.13068	4.49101	1.9765	2.22046	0.605683
791	1.89027	0.902191	4.4569	3.86912	2.77935	3.85056	1.01902	2.04337	1.26959	1.36815	0.965491	1.41644	2.07092	2.94017	2.13314	2.65038	1.73059	2.52781	3.61279	2.67425	4.41515	1.46547	1.53384	2.55895	2.49521	5.40535	5.1919	2.77829	5.05616	7.28685	6.48126	5.56317	4.86895	3.21527	3.53918	3.78808	1.54637	2.72078	0.32383
792	1.99534	0.543164	3.79302	3.6387	2.34548	3.38654	1.06073	2.10131	1.25418	2.04343	0.947249	1.51243	1.72269	2.90998	2.21323	3.07153	1.82102	2.38454	3.80046	2.84083	4.25325	2.61035	1.82631	2.05037	2.85676	4.39624	4.54754	3.71419	3.76712	5.81073	7.52753	5.59768	5.46744	5.27762	3.47764	3.92209	2.67331	0.603417	2.88113
793	2.0592	0.436816	3.91876	3.31171	2.29655	2.18515	1.27543	1.92813	1.19391	1.37798	0.935348	1.02773	1.39404	2.73927	2.36077	2.90201	1.71197	2.38487	3.0363	3.68868	4.51247	1.84161	0.40272	2.29617	2.35046	4.98204	4.4198	2.31267	4.0512	7.02346	7.23279	5.72427	5.55688	0.424192	3.40073	3.64108	1.78955	2.01338	1.4345
794	1.66976	1.02679	3.9094	3.69267	2.54702	3.2868	1.02937	1.94527	1.5637	1.84573	0.126884	1.64774	1.32062	3.01627	2.40414	2.78508	1.88367	2.05294	3.20026	2.48494	4.08452	1.96794	1.8072	2.8122	2.4961	5.26494	4.95522	3.00344	3.92344	6.86694	8.09903	5.62515	6.12071	5.26673	3.30348	4.17384	1.18113	2.06859	1.11193
795	1.8424	0.884876	3.27269	3.49922	2.31964	3.50652	0.891036	1.92442	1.22315	1.83882	1.05521	1.39938	1.34955	2.78241	1.99763	2.63185	1.42938	2.5761	3.39887	3.7401	5.31455	1.90524	1.29346	2.30734	2.75904	4.34398	5.22752	2.85753	5.11908	6.98191	7.19904	5.42399	5.84	4.92546	3.01215	4.1459	2.1059	2.0182	0.560212
796	1.835	0.358643	3.8804	4.07617	1.96588	4.19997	1.23209	1.96308	1.28457	1.81171	1.09417	1.26984	1.00957	2.68933	2.34907	2.80996	2.03978	2.2368	2.98421	3.53998	3.46916	2.81993	1.74731	2.33245	2.44369	5.2372	5.2064	2.23094	2.28649	7.7936	8.1044	4.97726	5.2321	0.663834	3.00384	3.5733	2.58701	2.49398	2.0368
797	2.06846	0.9692	3.25081	4.15417	2.61033	3.91728	1.22351	1.89274	1.48117	1.5747	0.368389	0.818887	1.22184	2.83654	2.35709	3.12025	1.86297	2.61389	4.23021	3.36893	4.54514	1.64096	1.61298	2.33108	2.81252	4.8469	5.50002	3.17708	4.88041	7.26128	9.22549	5.0435	4.44122	-0.0046412	3.42826	4.0165	3.20716	0.968092	1.88297
798	1.47149	0.913884	3.53127	3.95379	2.34798	4.07888	1.10822	2.09351	1.0223	1.43263	1.16901	1.1238	1.50513	3.2077	2.08738	2.569	1.80583	2.06815	3.52111	3.3213	4.22164	1.43247	1.42627	2.24029	2.50223	4.50656	5.24477	2.34877	3.73918	7.55338	8.05965	5.21578	5.49934	4.61992	4.285	4.01244	2.2675	1.85884	1.29026
799	1.8351	0.819649	3.84526	3.26583	2.23799	2.1679	1.49558	2.17776	1.2404	1.44617	1.099	1.20906	1.28904	3.01416	2.17316	2.78426	2.06209	2.42228	2.89284	4.52827	2.94176	2.22093	2.47929	2.58162	2.40118	4.56844	5.1282	2.8527	4.89188	6.83078	7.11732	5.38132	5.21511	4.00425	4.0775	3.25503	2.75412	2.92167	1.6369
800	1.79782	0.326545	2.90213	3.53971	2.22884	3.86768	1.13956	2.0219	1.23559	1.5609	1.3604	0.808033	0.961014	3.21229	2.31301	2.74395	2.48097	2.40357	3.55921	4.06332	3.61423	1.97868	1.40745	2.35214	2.80628	3.87074	4.63728	2.57637	4.10623	7.30869	8.68351	4.75369	5.4686	3.23121	4.66729	3.83578	2.20625	2.0909	2.03415
801	2.05826	0.828822	3.46342	3.53729	2.07926	3.38291	1.31799	1.8515	1.15963	0.720092	1.24891	1.07322	1.66657	2.75351	1.90128	2.28461	1.28755	2.47732	3.18568	3.32381	2.89985	2.33761	0.968489	2.39131	2.62164	5.05815	5.58584	1.60941	2.81299	7.68475	5.21284	5.12725	5.56367	4.68516	3.77174	3.1553	2.37532	3.44207	1.81847
802	2.20773	0.836022	3.57714	3.62545	2.20769	3.70846	1.14687	2.22823	1.50828	1.97948	1.24255	1.08647	1.55422	2.65683	2.11415	2.63134	2.4479	2.52616	3.63855	2.55118	4.69393	1.68633	1.85137	2.68546	2.12265	4.59376	4.49281	2.88268	4.29235	5.70732	7.97597	4.09263	5.50831	5.19918	3.45438	2.77224	3.1422	1.88987	3.11667
803	1.85085	0.67042	3.49544	3.6589	2.29718	4.07912	0.96449	2.00136	1.49645	1.21997	1.05766	0.949953	1.55867	3.11609	1.53275	3.40581	1.92585	2.62656	2.8969	3.26216	4.66435	2.05562	0.943002	1.15012	2.28099	4.45118	6.19592	2.927	4.29438	6.12431	7.46284	5.15391	5.11184	2.59466	3.49289	3.29075	2.5177	2.07744	0.675725
804	2.04099	0.873598	3.11668	4.10902	2.16357	2.64752	0.970398	1.88883	1.23039	1.6065	1.58965	1.05256	1.27698	3.09458	2.26032	2.64927	2.51994	2.34773	3.00825	2.38304	4.45047	2.21602	1.26371	2.08995	2.25064	4.84094	5.1489	1.9757	4.01153	7.11618	7.75066	4.92816	6.20848	1.70025	3.78256	2.78641	3.70052	1.84119	1.76256
805	2.05093	0.601608	3.40267	3.83072	2.45919	3.47514	1.21079	2.17137	1.18059	1.54903	0.64706	1.15386	1.35608	3.26082	2.08545	3.01264	2.48047	2.31015	3.62925	3.3868	2.12485	1.99283	2.2882	2.92926	1.95215	4.61843	4.60881	3.15579	2.88574	6.64538	7.26873	5.82912	5.25131	5.60381	3.62451	2.95133	2.55562	2.37255	2.13928
806	2.02332	1.2201	3.01303	3.66275	2.4363	3.32624	1.00572	2.1662	1.26547	1.17371	1.19207	1.07017	1.67521	2.84338	2.5314	2.86067	2.23406	2.71166	3.65143	4.14347	2.60078	1.8054	1.62826	2.80688	1.56507	4.25737	5.20634	2.79943	4.69648	7.27638	8.01038	4.79755	6.18614	6.09986	3.84541	3.46687	3.50167	1.49307	-0.291202
807	1.71656	0.395334	2.22746	3.72022	2.29826	3.55334	1.44013	2.08421	1.43578	1.57319	1.1851	0.825932	1.94442	2.73075	2.10274	2.84975	2.12431	2.2405	3.49336	4.14712	3.20322	2.36218	1.87766	2.28017	1.88819	4.18098	5.42051	3.53033	3.766	6.32098	8.72232	5.65895	4.47899	5.14167	2.65737	4.56062	2.31224	2.05179	1.20314
808	1.54597	0.347611	3.60462	3.69508	2.1978	3.74838	0.8902	1.7261	1.3618	1.98047	1.27395	0.982848	1.51301	3.04436	2.10717	2.73565	1.21568	2.02503	3.7381	2.41899	3.2861	1.82111	1.65911	3.00982	1.74296	5.91357	5.00558	3.11542	3.90625	7.74903	7.88332	5.57672	5.71759	1.38348	4.39173	3.48057	2.96141	1.06097	2.32389
809	1.86638	0.744096	3.50089	3.77447	2.61982	3.22738	1.13399	1.67444	1.44332	1.54284	1.21953	1.00923	1.25733	2.81066	2.55958	2.67354	1.96962	2.35392	3.08767	3.77888	4.43892	1.87977	1.46267	2.43814	2.64307	4.77421	5.96799	2.78598	4.47318	7.64593	6.54106	6.38035	6.32005	5.90872	3.72862	3.03595	2.80726	2.71309	2.60527
810	1.5841	0.714068	4.02911	3.58693	2.6579	3.45507	1.04465	1.71706	0.99634	1.23239	0.786488	1.21981	1.5116	3.09921	2.40751	3.1835	2.45245	2.58742	2.49539	4.05404	2.45165	2.0509	1.55744	2.76009	2.5994	5.31665	4.24847	2.84538	5.15628	7.08669	7.49555	5.59106	5.23988	3.12964	1.85053	4.03253	3.4569	1.50114	-0.168077
811	1.60238	0.734524	4.0867	3.00159	2.45396	3.65127	0.894287	1.9053	1.38436	1.21459	0.582017	1.30208	1.62317	3.0688	2.38375	2.99798	2.34301	2.43448	2.7884	4.43927	4.10768	2.09905	1.64102	2.97299	2.62301	4.49797	5.2015	3.00394	4.07389	6.50473	8.12823	6.53363	4.19226	5.84727	3.60926	4.4783	2.55607	2.94622	0.669206
812	2.13095	0.516265	3.98746	3.67691	2.73507	2.70248	1.12754	1.96543	0.857251	1.52678	0.919237	1.26456	1.19578	3.09239	2.1715	2.42794	2.4472	2.38999	3.80762	3.66395	4.50249	2.65783	2.3227	2.44562	1.42814	4.94195	5.74573	1.67365	2.80329	6.6703	8.18689	4.98961	4.09175	4.88054	3.66262	3.89493	4.236	2.00198	1.35114
813	1.73001	0.566321	2.95423	3.58197	2.28449	2.80706	0.972322	1.85891	1.23942	1.27535	0.904942	1.22261	1.54004	3.00531	2.03245	2.57451	2.2577	2.82298	3.06736	4.50538	3.57493	1.95004	1.76612	2.23579	2.8724	4.72114	5.23857	0.631385	2.82689	6.90578	7.48567	4.25395	5.46074	3.79145	3.95808	2.96862	2.97248	1.43004	2.7163
814	1.68552	0.784736	2.96699	3.54562	2.16304	2.81765	0.858073	2.0435	0.991004	1.66113	1.40077	1.18424	1.52099	2.66439	2.1181	2.60804	2.19735	2.55158	3.7056	3.86475	4.63795	2.1851	1.64589	2.75816	1.8375	4.31355	4.72087	1.95563	3.81207	6.2602	7.40366	5.84929	5.97323	-0.598039	3.59738	2.92693	1.91616	2.43905	1.28595
815	1.63573	0.72293	3.84812	3.57086	2.21121	3.44624	1.35718	1.99015	1.64307	1.40356	0.917431	1.16494	1.58242	3.15829	2.32194	2.93388	2.35399	2.35949	3.57462	2.90893	4.26493	2.32849	2.02013	1.60131	2.42241	4.84957	4.86388	1.1192	4.33509	7.56901	7.75797	4.69873	4.84834	1.23162	3.81115	3.86713	2.98884	1.64069	0.0374101
816	1.92722	0.648292	3.47045	3.98062	2.60547	3.46424	1.27639	1.70792	1.59206	1.72296	0.595909	1.11862	0.865435	3.07594	2.23406	2.70814	1.96569	2.42008	3.7472	3.33997	3.7223	2.11497	1.70363	2.25648	1.55787	5.28583	5.35776	2.45831	4.4319	7.02029	7.06529	5.59009	4.44827	5.36194	3.41907	3.11222	3.29612	1.34564	2.26287
817	2.05892	0.775796	3.82032	3.5579	2.36875	4.03263	0.959378	1.93845	1.6326	1.74502	1.20531	1.3168	1.52696	3.15476	2.44167	2.8862	1.87871	2.87429	3.65939	3.31465	3.5765	2.69052	0.825825	3.09477	2.06196	3.83496	5.37823	2.8531	5.54792	6.54274	8.18302	4.86595	5.35902	4.45305	2.49959	3.43999	2.90952	1.02796	0.324026
818	2.00072	0.86347	3.68103	3.65684	2.48595	3.90363	0.867149	2.20066	1.48726	1.71371	1.15341	1.01217	1.29267	3.2053	2.32284	2.66673	2.32593	2.3629	3.69052	3.69509	4.84663	1.45834	1.44369	1.90217	2.79112	6.06683	5.02924	2.06252	4.83666	6.01691	7.87213	4.81348	5.07355	5.06607	4.87511	3.91594	3.65749	1.65016	1.47102
819	1.99565	1.03621	3.18837	3.77421	2.30986	4.04975	0.98827	2.21768	1.23316	1.75425	0.665762	1.07509	1.20045	3.3676	2.29125	2.65118	2.00723	2.69357	3.91283	4.28328	3.30462	1.54126	1.73873	2.64016	2.05308	5.22674	4.95937	2.58771	4.8671	7.72834	7.42472	4.22901	5.29035	5.01472	-1.08784	4.1351	1.97359	0.452585	2.14659
820	1.9039	0.839786	3.86629	3.75728	2.71757	4.39359	1.39245	1.91114	1.51938	1.49513	1.20844	1.13124	1.50999	3.14163	1.9349	2.67482	2.45278	2.73795	3.6727	4.31804	4.15696	2.35012	1.7515	1.74512	2.30063	4.18886	4.67667	2.85945	4.98911	6.54135	7.79237	6.22576	4.57085	5.0215	4.23671	3.88803	3.21182	1.64358	2.26973
821	1.45889	0.385566	3.80647	3.39683	2.22372	3.96504	1.20187	2.04522	1.17517	1.76022	1.30861	0.935738	1.8462	3.49692	2.08838	2.83007	1.46568	2.63488	3.79477	2.46086	5.2648	1.75972	1.52339	2.02572	1.18451	4.49664	4.46801	0.684308	4.25808	6.86851	8.32246	5.12973	5.00763	5.29364	2.99211	4.57262	2.58071	0.737837	-0.256582
822	1.72971	0.923608	3.68173	4.00667	2.39196	2.76913	1.03594	1.97267	1.67615	1.76942	0.902054	0.913723	1.7125	2.98389	2.33147	2.24013	2.06328	2.3195	2.12838	2.55982	4.92067	1.63977	1.00264	2.66151	2.00417	4.71733	4.65419	3.587	4.89311	6.8383	7.25365	5.93158	5.38319	3.68485	3.97908	3.88176	2.81738	1.78227	1.49247
823	1.5207	0.288671	3.61933	3.36183	2.18857	3.03911	1.21337	1.8956	1.55546	1.44192	1.33184	1.31537	0.477502	3.20322	1.24637	2.81912	2.37827	2.47676	2.79054	3.3513	3.26387	2.14879	0.44207	2.17423	1.95476	3.70003	4.97792	4.24012	5.01424	7.62254	7.26486	5.42965	5.61732	4.70939	3.40234	3.61888	3.97622	2.36797	0.990448
824	1.42548	0.813458	3.64934	3.9806	2.38174	2.79732	1.26185	1.94514	1.57754	1.64253	1.07129	1.13579	1.27308	3.25694	2.22708	2.95822	2.03198	2.50208	2.39085	3.64101	4.15315	2.61153	1.94955	2.78963	2.76947	4.72111	4.39547	3.03215	4.92329	5.37113	6.46764	5.56332	4.61797	2.66607	1.81371	3.31452	3.5659	0.613829	0.679654
825	2.10723	0.803613	3.41127	3.64765	2.31087	3.54535	0.843138	2.07456	1.55542	1.82027	1.00293	0.951727	1.36614	3.59417	1.98971	2.93475	1.98552	2.72915	2.31936	5.45565	5.20361	2.03508	0.892867	2.2429	2.01017	4.45671	5.04916	2.52462	4.33493	7.15741	6.67231	5.409	5.45976	4.78008	2.94656	3.17132	2.86657	0.665068	1.90106

## Sheet: Fig 7B-D
Source Data	Figure 7B-D	AWC & ASH VGLUT-pH data: Tau values from single exp fits
		plus supporting statistical analysis
	AWC P1 tau (secs)	AWC P2 tau (secs)		Descriptive Statistics	AWC P1	AWC P2	ASH
	17.1575	9.93406		Number of values	37	37	168
	15.2766	3.10085
	22.1821	9.92382		Minimum	4.763	3.101	1.169
	22.0307	10.3693		25% Percentile	13.72	5.546	4.668
	12.0558	8.95032		Median	16.09	7.369	7.004
	23.6187	7.80281		75% Percentile	18.99	9.317	10.45
	17.3835	9.68372		Maximum	28.29	15.86	28.98
	28.2858	11.1228
	14.0338	8.7903		Mean	16.75	7.638	8.28
	11.5851	6.57901		Std. Deviation	5.075	2.727	4.943
	14.8999	8.94095		Std. Error of Mean	0.8344	0.4483	0.3813
	17.1431	3.91752
	13.4064	7.10747		Lower 95% CI	15.06	6.728	7.528
	17.7432	6.64275		Upper 95% CI	18.44	8.547	9.033
	14.7263	4.42236
	18.2918	5.57847
	19.6837	4.62669
	16.7395	4.83193		Paired t test (Fig 7B)	AWC P1 vs. P2
	24.3898	6.50951		P value	<0.0001
	15.8309	6.73819		P value summary	****
	18.1327	8.26164		Significantly different (P < 0.05)?	Yes
	8.16595	8.21099		One- or two-tailed P value?	Two-tailed
	17.6402	13.0643		t, df	t=10.3 df=36
	13.9744	7.24394		Number of pairs	37
	9.95723	11.8368
	21.9823	5.51413		How big is the difference?
	13.4622	4.42351		Mean of differences	-9.111
	26.0634	10.0622		SD of differences	5.381
	14.1226	5.32774		SEM of differences	0.8846
	26.4202	6.79479		95% confidence interval	-10.91 to -7.317
	16.0903	5.99502		R squared (partial eta squared)	0.7466
	16.0431	7.57155
	14.6179	15.8636		How effective was the pairing?
	16.8035	7.36919		Correlation coefficient (r)	0.1532
	12.4133	7.73089		P value (one tailed)	0.1827
	12.5902	7.72921		P value summary	ns
	4.76251	4.02332		Was the pairing significantly effective?	No
	From Fig 6D: ASH tau (secs)
	12.2016			Kruskal-Wallis test (Fig 7C)	AWC P1, AWC P2, ASH
	6.60036			P value	<0.0001
	4.64967			Exact or approximate P value?	Approximate
	10.5013			P value summary	****
	13.0372			Do the medians vary signif. (P < 0.05)?	Yes
	2.1896			Number of groups	3
	6.72986			Kruskal-Wallis statistic	59.72
	9.26583
	3.95809			Data summary
	5.68765			Number of treatments (columns)	3
	28.979			Number of values (total)	242
	11.7382
	9.88946
	15.4168			Dunn's multiple comparisons test (Fig 7C)	Mean rank diff.	Significant?	Summary	Adjusted P Value
	3.74017
	13.8802			AWC single Pulse vs. AWC 2nd pulse	95.97	Yes	****	<0.0001
	8.10852			AWC single Pulse vs. ASH	96.77	Yes	****	<0.0001
	11.7009			AWC 2nd pulse vs. ASH	0.795	No	ns	>0.9999
	14.701
	9.60795
	4.33689			Test details	Mean rank 1	Mean rank 2	Mean rank diff.	n1	n2
	18.3832
	16.0333			AWC single Pulse vs. AWC 2nd pulse	203.4	107.4	95.97	37	37
	9.24034			AWC single Pulse vs. ASH	203.4	106.6	96.77	37	168
	5.73732			AWC 2nd pulse vs. ASH	107.4	106.6	0.795	37	168
	18.7524
	21.7869
	2.53852
	3.48703
	4.52196
	5.12618
	10.0092
	6.26749
	4.54365
	1.87858
	5.21695
	6.44904
	4.66005
	18.7023
	7.13925
	8.70402
	6.7813
	5.37464
	8.43346
	15.7538
	6.30562
	4.07174
	9.1313
	11.2833
	7.00822
	6.9998
	6.96865
	11.8472
	3.71932
	3.46683
	3.10383
	9.64025
	9.95942
	3.09046
	12.3833
	15.1938
	4.71713
	9.46523
	10.0045
	5.42233
	6.39184
	10.2473
	10.3149
	14.419
	8.27471
	17.4327
	3.50941
	5.67289
	6.46358
	14.8708
	1.64218
	10.1301
	7.24727
	4.01
	4.77306
	5.51466
	2.46188
	1.93265
	5.45883
	7.54831
	13.8324
	14.9484
	5.35419
	1.16915
	5.95294
	7.06564
	5.12558
	7.21836
	5.9478
	3.49603
	6.27437
	8.52517
	3.2764
	4.48062
	5.35696
	9.43589
	15.7737
	9.16951
	20.5901
	5.96015
	4.07908
	14.3292
	16.8976
	13.5135
	11.4789
	8.24761
	5.14267
	3.84993
	5.47444
	5.13265
	4.83964
	7.55176
	2.80632
	22.0881
	5.65742
	4.23321
	7.16154
	4.41443
	1.50104
	8.83168
	7.14521
	4.16756
	4.60624
	4.92469
	7.26766
	11.9766
	4.6003
	7.4299
	4.06267
	3.7527
	9.39527
	4.42212
	9.58798
	5.61595
	7.79708
	4.68998
	13.9076
	4.11988
	6.8242
	7.92273
	11.6475
	8.73114
	1.92205
	4.86262
	3.65983
	5.9955
	5.95939
	9.31429
	13.0286
	3.89391
	7.44419
	20.487
	10.832
	15.3541
	11.5586
	10.4397
	4.43297
	7.21077
	10.4581
	5.91331
	10.5316
	5.87967
	26.6098

## Sheet: Fig 7E
Source Data	Figure 7E	AWC VGLUT-pH data: individual dF/F(%) traces
		Three trials per animal: Read from left to right; Trial 1 signifies a new animal
		Acquisition Rate: 5 Frames/sec
		Pulse 1		Pulse 2
		Stimulus ON:	Frame 150	Stimulus ON:	Frame 525
		Stimulus OFF:	Frame 450	Stimulus OFF:	Frame 625
	wt VGLUT-pH																						unc-11(e47) VGLUT-pH
Frame / Trial #	1	2	3	1	2	3	1	2	3	1	2	3	1	2	3	1	2	3	1	2	3	Frame / Trial #	3	1	2	3	1	2	3	1	2	3	1	2	3	1	2	3	1	2	3	1	2	3	1	2	3
1	2.8546	3.15742	3.47614	2.62975	1.78918	2.20624	5.2741	4.85381	4.02325	4.87405	5.36125	4.20825	5.54704	6.73054	4.79056	5.47082	6.02067	2.71518	2.8197	2.70468	0.89797	1	0.876021	5.79165	8.25974	4.63343	2.3782	3.43389	2.84018	6.12011	4.717	-1.58658	3.31708	2.87406	7.98659	5.33748	0.585587	4.02969	4.66578	4.95033	4.6333	3.30033	5.77232	7.6027	0.928665	3.41725	3.80243
2	3.93743	3.86713	3.71402	2.54314	1.65993	1.99787	4.57395	3.89826	3.76908	3.77541	5.05319	4.07441	5.86815	5.32603	4.32804	4.88275	5.6568	1.20278	3.69038	3.33266	1.60938	2	0.316469	5.40502	9.66317	4.53104	1.9696	3.26	3.1412	5.07375	4.05406	-0.504465	2.82488	3.33438	8.23672	4.60734	1.02553	3.80892	4.20621	5.40222	4.5457	2.52786	5.88081	8.95719	1.4413	3.87336	3.90728
3	1.77299	1.69384	3.08337	2.12287	1.52312	2.36804	5.12356	4.16348	3.78105	4.17923	2.87189	3.10408	5.91204	6.50856	4.99895	3.04733	3.8008	3.01867	4.47525	3.54179	1.90234	3	0.331856	5.97915	8.33391	3.32898	2.12921	3.08929	3.10974	5.75535	4.73604	-2.19132	3.10152	2.99134	7.45699	4.73626	1.03765	3.47669	5.3254	4.76319	3.24548	3.92084	6.11144	8.42612	1.89367	3.2322	3.74501
4	1.85317	2.16304	3.63547	2.89	2.33724	1.60239	5.19401	3.54542	5.11937	4.15851	3.04762	3.64876	7.07894	5.76068	4.40871	5.01237	5.1476	2.02121	3.18992	2.03364	-0.632748	4	0.533987	4.99611	8.07504	4.1909	2.12113	2.95353	3.71038	5.52742	5.38172	-1.76121	3.34529	3.83292	6.9031	4.9396	1.15044	4.34654	5.54828	4.49662	4.24938	4.28107	6.27142	7.28401	1.1522	3.89632	3.27491
5	2.80382	4.14789	2.7256	2.25145	1.92938	1.87292	4.8944	4.15852	3.76092	3.62058	4.46263	3.10621	5.1947	6.94193	5.04451	3.94902	4.95614	3.93685	4.34021	2.54295	1.21945	5	0.7323	5.39689	7.94876	5.03758	3.09308	4.01	2.70395	5.09916	3.97203	-0.67228	2.52056	3.83117	7.57375	4.52224	0.676355	4.51714	5.86436	4.47184	5.1263	4.83197	5.89404	6.89391	1.59218	4.37726	3.8381
6	3.48745	2.16427	3.18442	2.45615	2.06162	1.84553	5.11106	4.90766	4.82173	4.75073	4.48563	2.95864	6.67005	6.81335	4.79521	3.97885	6.35632	2.46997	3.1862	1.69928	1.59703	6	0.734974	5.92171	8.86238	3.97943	2.46262	3.66411	2.97915	5.2608	4.56509	-1.42571	3.06885	2.34818	8.71462	5.11805	0.473328	3.48652	4.60897	3.27653	4.29294	4.25527	5.84004	7.50357	1.67354	4.25847	4.23231
7	2.59659	1.89613	3.14095	2.68659	2.09163	1.96317	4.67129	5.06711	4.76161	4.56142	4.45974	2.76489	6.96566	6.08498	4.3261	4.95968	5.95451	2.53686	3.3254	2.81031	0.626351	7	1.54646	5.06619	9.71519	3.54715	2.87281	3.62987	2.94064	5.07291	4.82601	-1.38191	2.81136	1.85686	5.96011	5.05454	1.47086	3.66494	5.13517	4.59552	6.21464	4.25645	6.45372	7.47857	0.363604	3.94196	3.56204
8	2.4134	2.75497	3.98714	3.02082	2.01084	2.00108	5.15709	4.8771	6.22352	4.44544	4.89301	4.46162	5.7617	6.05505	5.07232	5.04137	5.77441	1.55074	2.83176	3.13069	1.96296	8	0.839985	5.67565	7.50576	4.13728	2.6922	3.35894	3.20461	5.31617	4.37019	-1.24018	2.92315	2.8194	8.17581	4.34633	1.00148	3.95322	5.06015	4.91631	4.37516	4.31146	6.28446	8.41068	1.70129	3.12833	3.53516
9	1.73048	4.33642	3.96531	2.68307	1.72966	1.97026	3.71329	3.62483	4.47972	4.83209	3.90953	4.01301	6.16125	5.71764	5.1761	4.36786	6.51922	2.92046	2.88273	2.44851	1.69909	9	0.866497	5.30665	8.85673	4.45133	3.10872	4.1825	3.09246	5.66215	4.52438	-2.28813	2.17426	2.94404	8.12607	4.4023	0.658145	3.91759	4.33025	4.57614	3.99856	3.73969	5.97376	8.19324	1.32855	3.90206	3.20985
10	2.1992	4.11656	2.78031	2.57883	2.35292	2.08451	4.22182	5.05953	5.01425	4.50192	4.30308	3.03026	5.73035	7.04652	5.61253	4.58117	5.37842	1.70127	2.15828	2.53901	1.81258	10	0.305104	4.93343	8.00567	4.45825	2.38613	3.17862	2.89947	5.37171	4.56839	-1.31134	2.76215	2.0625	7.75981	3.75562	0.82169	3.95833	3.53779	4.68336	3.56453	4.17942	6.30209	9.425	1.52727	4.6154	2.95962
11	2.41619	1.88451	2.30014	2.51528	1.99059	1.85934	4.64351	4.34727	4.82664	3.10213	3.98578	3.71531	5.8684	5.08395	4.11104	4.21939	4.96852	3.15258	3.30523	2.12776	1.88879	11	0.768017	4.97995	7.10543	3.69458	2.90736	3.64381	2.52207	5.62927	4.69478	-1.47777	2.89071	4.40424	8.11486	5.66436	0.196883	4.46862	4.76933	4.08275	4.95448	5.11896	6.17474	7.57483	0.908038	3.83663	3.65455
12	2.37008	1.19489	3.40865	2.84449	2.10191	0.954191	3.83102	4.76058	4.31203	4.06941	5.14418	3.89062	6.18566	5.66714	4.94321	5.1457	4.54128	1.65469	3.14329	2.85028	0.497555	12	0.262469	4.73069	8.6036	3.99093	2.08121	3.44139	3.13948	4.84609	3.81212	-1.34471	2.6728	2.45986	7.85049	4.25734	1.24076	4.66176	5.20197	5.03301	4.8019	4.33808	5.85487	8.21811	2.01881	4.21201	3.79079
13	1.90385	1.5932	3.16914	2.46886	2.02921	1.58061	4.80344	4.51928	3.66402	3.90026	4.70662	4.19481	6.5321	6.18172	5.03582	5.46262	5.78434	2.18099	3.47287	3.34909	1.72607	13	1.08533	5.25379	8.62164	4.09758	3.35329	3.68986	3.48502	6.1382	4.72941	-0.856975	2.71049	3.72026	7.83363	3.84131	1.8943	4.70386	4.3548	4.1735	4.80284	3.52438	5.32741	6.73665	1.75355	4.48145	3.34643
14	2.40154	2.87876	4.59127	2.74736	2.33394	2.55832	4.16526	4.82557	3.76613	4.88784	4.68156	4.4205	6.62196	6.60114	5.48546	6.30001	4.22734	2.56346	3.89826	1.34248	0.399953	14	0.682742	5.47688	7.9751	4.63635	2.86185	3.69444	2.21256	5.20981	4.70711	-0.891012	3.64967	2.22773	8.31331	4.79108	-0.387397	4.47776	4.94623	3.27756	3.97747	3.92082	5.62312	7.24797	1.89574	3.85305	1.98069
15	2.09227	2.65385	2.56461	3.24309	1.9967	2.18512	4.34859	4.19643	4.76988	3.78666	4.10745	3.90574	6.01492	6.71278	5.13799	4.4731	4.31129	2.6608	3.8193	2.96594	1.32526	15	0.43795	4.70429	8.81999	2.77097	2.61467	3.78517	2.54239	5.62228	4.78669	-1.4786	2.29462	3.09059	8.67995	4.1515	0.951795	4.38756	4.04659	2.42709	3.29229	3.59677	6.38543	9.35152	2.26116	4.01883	3.65227
16	3.62214	1.92377	3.28962	2.85977	2.69473	2.07113	4.38759	4.11022	4.56447	3.33927	3.61336	3.35359	6.6354	6.10413	4.24747	4.80995	2.80633	1.74614	3.10416	3.17444	1.9333	16	1.1698	4.98207	8.53301	3.88243	2.56187	3.64401	2.52559	5.83858	5.47582	-1.38752	2.06948	2.18158	7.96666	3.61312	0.631256	4.16854	5.18724	4.5122	3.82821	2.93185	6.57685	7.49384	1.67632	3.95528	2.99179
17	2.95461	1.69185	3.62783	2.22274	2.83111	2.44689	4.27725	4.6236	3.97612	4.17797	3.91071	4.96832	7.23222	5.72705	3.82882	5.36176	5.55197	2.76201	3.2769	1.94609	1.22683	17	0.350243	4.57765	6.4086	4.7132	2.87436	3.69522	2.45104	4.2182	4.57412	-0.59206	3.6191	2.71497	9.0387	4.41279	1.50896	4.15822	4.20265	3.2626	4.51356	3.66721	5.35337	7.60916	1.26598	3.3392	3.95245
18	1.81332	2.69717	3.87998	2.82257	2.05397	2.14369	4.13257	5.21089	3.72228	3.82526	4.35553	3.96987	5.87114	5.91108	5.73228	5.43912	4.67746	1.40728	4.01197	1.53134	1.86532	18	0.545271	5.17214	8.32634	4.50461	2.5102	3.96489	2.7402	5.95743	5.20415	-1.17126	3.68676	4.1212	8.05983	4.1558	0.801822	3.94524	3.53226	3.83274	4.53484	3.40653	5.87186	7.76229	2.07093	4.30756	2.89855
19	2.62954	3.64355	2.60988	3.05322	1.88051	1.56804	4.09684	3.75132	4.29755	3.29881	5.38346	4.02389	6.02174	6.6499	4.84472	5.09422	6.38817	2.28384	3.30115	3.12811	2.33781	19	0.796878	5.09167	8.03838	3.41614	2.8726	3.77871	2.48732	5.96732	3.37464	-0.827191	3.57368	4.58725	8.4984	3.59408	1.12762	5.00448	4.95388	5.21303	4.71107	3.10022	5.27396	7.24016	2.4419	3.41413	3.693
20	2.80879	2.8842	2.87511	2.41237	2.35212	2.36121	4.12764	4.40045	3.7159	3.97426	4.35712	3.16295	6.39424	6.88091	5.27681	4.98363	4.47675	2.66988	2.25442	3.02245	1.39052	20	1.02517	4.94694	6.90377	4.12486	2.63191	3.83566	3.39881	6.21003	4.01322	-1.43634	3.27834	3.04883	8.92256	4.38425	1.00655	4.60673	4.12357	4.27822	4.99476	4.3359	7.06473	7.79716	1.54138	4.18239	4.02924
21	3.35226	1.81564	3.26068	2.80745	2.05217	2.27686	4.74915	4.65604	4.2282	4.95005	4.24397	3.89631	6.276	6.2994	5.14716	4.72331	5.42033	2.57688	3.66919	2.18852	2.15058	21	0.615387	5.7691	6.22851	3.61618	3.40578	4.47427	2.66645	5.59892	5.23758	-1.84561	2.7447	2.11556	8.95015	4.37203	0.99251	4.21637	5.65853	4.19449	4.51747	3.91169	6.91726	7.17667	1.63497	3.50495	4.10746
22	3.07729	2.31816	4.96104	3.05434	2.02202	1.64652	4.16448	3.4451	4.41436	4.41966	3.67969	4.85813	6.8628	4.76587	4.96854	4.75254	5.24052	2.69436	3.5704	2.66722	0.270973	22	1.08212	5.56013	9.0734	4.45312	3.32841	3.80154	3.33085	6.3785	4.55192	-1.41614	3.10702	5.44404	6.7294	2.99614	0.397969	2.7976	4.62658	5.02141	5.10498	4.01348	6.61409	8.97149	2.31852	4.57193	3.29298
23	2.95382	3.86161	3.01404	3.31129	1.1181	2.15559	3.65594	4.285	4.93386	2.49146	3.95352	3.88852	5.25618	6.21358	4.60797	3.99589	4.2783	2.53762	3.46098	2.1887	1.79377	23	1.4541	5.5642	6.51674	4.04691	3.3352	3.99245	2.69667	6.0548	4.07456	-1.52901	2.88751	2.98594	8.08315	4.79268	1.27511	4.85784	4.32204	4.43445	4.08939	3.37957	6.15256	8.40719	1.71593	4.80683	2.44409
24	2.39383	2.63693	3.59813	2.5324	2.53652	2.17963	4.58739	4.51504	3.62891	2.86031	4.09937	3.55996	6.42612	5.58972	5.0379	5.36658	4.95844	1.44381	3.2444	2.57497	1.82643	24	0.802712	5.56872	7.78422	4.40769	2.13666	4.57425	2.74722	5.36817	6.08307	-1.75292	2.15914	2.36249	7.34858	4.39196	0.442161	4.64495	4.32464	4.04861	4.74631	3.97818	6.076	7.49043	2.29712	4.78923	4.15145
25	3.43405	1.32995	2.78504	3.28969	2.65672	2.56624	4.54997	4.52303	4.24012	3.6181	3.57584	4.46075	5.06916	5.90275	4.5542	5.0182	5.49126	3.10129	5.05009	3.18397	0.250553	25	0.708404	6.38849	7.43141	4.12299	2.61083	3.70289	2.74699	5.0789	4.75261	-2.22551	1.26966	2.16008	7.81153	3.84275	1.07667	4.30457	4.69094	2.81156	3.34946	3.10299	6.71439	8.52323	0.653353	4.29817	1.97652
26	2.42362	1.9778	3.11598	3.02396	3.08724	2.31915	4.33689	5.52767	4.0649	3.7654	3.18886	4.50099	6.10538	6.0394	5.63333	4.64508	6.22738	3.13283	3.5951	2.70922	1.86176	26	0.628409	5.95475	9.69428	3.89727	2.71442	3.11684	2.98251	5.74625	4.40251	-1.18057	4.01758	2.93673	6.59362	3.93147	0.871187	4.16684	5.35987	4.41602	3.64942	3.73826	6.31965	4.41414	1.30756	3.23725	4.20882
27	2.68087	3.15143	3.98863	3.13802	2.8935	2.31216	4.37373	5.17399	3.21895	3.5585	4.74286	4.8485	6.26913	6.31202	5.92775	3.08659	5.25133	2.78561	4.32052	0.631197	0.391013	27	0.709258	4.99872	8.98929	3.69566	2.60947	2.82304	2.3596	4.9283	3.88827	-1.59063	1.89038	4.01935	6.90436	4.69747	1.71833	4.30933	3.94123	3.86706	3.97369	4.34273	6.54021	7.95284	1.22593	5.00637	2.00489
28	3.88263	4.0876	4.27857	2.80281	2.96091	1.98675	3.9342	4.65252	3.38186	2.93776	4.37467	4.74435	5.95724	5.98284	5.0632	4.86988	4.10382	1.8291	4.49491	2.25043	1.89275	28	0.549094	5.52764	7.44651	4.36057	3.19966	4.60883	3.20534	6.0159	4.46508	-1.62152	3.95196	2.26956	8.09243	4.57215	1.16151	4.43869	5.00062	4.23736	3.90307	4.25768	5.96845	7.06197	1.3666	4.56906	3.94025
29	2.43176	3.55246	2.9873	2.62258	2.8261	2.71952	4.50266	4.76467	3.82584	4.20704	4.11093	3.38121	6.03114	5.1798	5.24733	5.52104	5.38866	2.17561	3.76373	2.71097	1.76931	29	0.279774	5.73943	9.2554	5.54575	2.77432	4.21243	3.06202	5.79257	4.67804	-0.379074	3.66705	2.51779	6.85155	5.00832	1.78562	4.1158	4.39716	3.59649	3.72188	4.47895	5.97748	7.84119	1.9823	4.79786	3.50645
30	2.36105	2.80322	2.8009	2.5817	1.94512	2.47391	4.98138	4.93998	3.37475	3.22993	3.72416	4.67529	7.4131	6.58625	5.78476	5.5303	5.06096	2.56154	3.44802	0.903954	1.84429	30	1.14071	4.98215	7.94359	3.82741	1.6269	4.53653	3.09927	5.53545	4.91647	-0.605039	2.99846	2.6719	8.90869	5.26878	1.76876	4.3618	4.87151	4.32718	4.74422	5.01204	5.66362	7.6276	0.879442	4.81167	2.67114
31	3.1874	2.28219	3.88951	2.92627	2.29547	1.93172	3.79109	4.47192	4.0329	4.12672	2.89548	4.35391	5.61446	5.82088	4.07287	4.75479	4.91805	3.41261	4.14816	1.64812	1.22651	31	1.38669	5.75796	7.92115	3.80763	2.78684	4.799	3.56274	4.91342	5.30172	-0.760813	2.38186	3.88717	8.16009	5.57181	0.515273	3.86643	4.70967	4.16748	3.91461	4.04485	6.34438	7.05822	2.1014	3.96102	3.09521
32	2.20228	3.7886	2.80411	2.73863	2.74442	2.19172	4.26667	3.9872	4.84975	4.01734	4.203	3.59163	5.98579	6.22984	5.49943	4.30817	4.6582	2.01631	4.27969	3.65103	2.18461	32	1.11328	5.13853	8.33944	4.21156	2.09593	4.44092	2.68002	5.54154	5.0135	-0.69684	2.7398	3.63969	8.31945	3.78957	0.309319	3.56473	4.97893	4.84592	3.98209	3.33627	6.0359	8.03113	2.03854	4.85584	3.34923
33	2.80871	3.66402	3.12861	2.90018	2.62787	1.95478	4.08831	4.31151	3.63445	2.77316	4.4793	3.26226	5.58207	5.81183	5.67949	3.97958	5.0877	2.82751	4.47303	1.84985	1.37976	33	0.876232	5.62374	7.98591	4.49522	2.70073	4.7449	3.41032	4.43486	4.8458	-0.303085	1.7362	3.20254	7.77827	4.78268	0.964376	3.85757	4.21843	2.9849	3.25913	3.36238	6.40099	7.38344	1.72616	3.89966	3.23115
34	1.99651	3.46807	2.66603	2.94754	2.20023	1.59999	4.00108	4.42642	4.50751	3.59697	4.17453	4.05989	5.87609	5.3896	5.58978	5.34009	5.3385	3.58995	3.99174	2.86804	-0.39607	34	0.161871	4.83767	8.57156	4.43019	2.7308	3.73618	3.50615	5.16906	5.21008	-0.788599	2.94754	3.81833	7.39637	4.16065	1.20281	4.4524	4.16416	4.19295	2.48066	5.20736	5.7894	6.78731	1.53931	4.00594	3.56615
35	2.37731	2.9664	2.89685	3.36904	2.56079	2.44336	4.79847	3.97319	4.92739	2.21414	4.31757	4.40468	6.42707	6.06734	5.00469	4.27477	5.83378	2.50453	3.89365	3.50191	1.51186	35	0.677473	5.29975	8.42976	3.56971	1.68615	4.45812	2.46615	5.27065	4.77172	-0.107064	4.03972	3.91517	9.12967	4.33034	2.16854	4.79446	5.01123	2.94026	3.61963	4.34101	6.14814	6.49619	1.88263	5.36919	2.28255
36	1.34423	3.54457	0.821199	3.06038	2.25375	2.1364	3.96659	2.99803	4.33062	3.90329	3.97257	3.68492	6.66964	6.52448	5.22495	4.22449	4.80511	2.59489	4.49511	2.38776	1.55002	36	0.803775	6.10101	8.33042	4.08699	1.73309	4.25004	3.19287	5.92843	5.21829	-1.02546	3.12324	2.85485	6.82654	3.35393	0.517405	4.36273	4.0153	4.46297	3.6341	3.20095	6.24038	6.81843	1.30433	5.22135	3.31243
37	2.20976	1.42355	1.51418	2.86235	3.21563	1.91113	5.12351	4.75071	4.73722	2.56048	5.27959	3.65646	6.44178	3.57577	5.78861	4.29468	4.39458	2.98975	3.82569	1.79091	2.62005	37	0.363057	5.6006	7.25194	4.38372	3.05806	4.2049	3.9327	6.27883	5.08086	-1.12322	4.45322	3.44334	9.37329	4.02846	2.40863	5.0521	4.59985	4.23456	3.42672	3.03567	5.9711	8.08524	2.01801	5.35277	3.54412
38	1.67898	2.67831	3.54233	3.21042	2.11869	2.64759	3.98839	4.49093	3.7841	3.4963	4.57821	4.12184	6.15906	6.74663	6.14361	5.11111	4.83117	3.34668	3.95726	3.06132	1.70799	38	0.436931	5.29988	8.47932	3.39019	1.99895	4.15321	3.34509	4.36675	4.99718	-0.638163	3.14922	3.62459	8.4433	3.95919	0.91014	3.61339	5.62584	4.07176	3.84685	4.58241	5.42362	8.38878	1.96552	5.2507	2.71965
39	3.0818	4.00614	1.96848	2.86716	2.80766	2.27675	3.915	4.90826	3.51447	3.30856	4.97954	4.25248	5.14746	6.17429	5.5338	3.65292	4.55642	3.02274	4.80292	2.55853	0.636348	39	0.0432118	5.25232	7.67662	2.82672	2.89674	5.12965	2.21258	4.85832	4.27516	-1.01069	3.66722	4.21813	8.38575	3.55074	1.16202	4.55968	5.45247	4.01883	4.0435	4.1631	5.93681	7.25037	2.5197	5.12648	3.25074
40	3.12018	3.8193	3.51823	3.35906	2.93	1.9926	3.17262	5.01336	4.20834	2.05646	4.34243	4.82428	6.54791	5.74299	5.3538	4.5016	5.46795	4.08241	4.18637	3.51875	2.12643	40	-0.0933688	5.54563	8.63351	4.45268	1.83823	4.05488	2.63857	4.91924	5.471	-0.649638	1.84483	3.32227	7.7689	4.71897	1.54368	3.83901	3.35599	4.81712	3.85904	2.33905	6.30485	7.96366	1.07655	4.90595	2.92541
41	3.51639	4.09356	4.12397	3.41082	2.49026	2.56337	5.14814	4.1176	3.9216	2.89801	3.8381	3.10426	6.41003	6.21339	5.57484	3.59193	5.2936	3.49038	3.88723	2.93288	1.24959	41	0.717503	4.976	8.73762	4.34061	1.99771	3.89869	3.9886	5.32692	5.56721	-0.521379	3.19754	3.35656	8.09242	5.01588	1.58739	5.00392	4.07544	3.67802	3.49539	3.52762	6.08758	6.81684	1.97523	5.21386	2.598
42	2.88777	2.28451	3.27448	3.08761	3.08637	2.39245	4.13636	3.69027	4.63663	3.03989	3.98368	4.08679	7.06098	5.69672	5.76259	3.52658	4.69015	3.19233	2.82715	2.33557	1.81282	42	0.309639	6.24282	7.45313	3.89853	2.43465	3.99438	3.2427	5.04895	4.7048	-0.753631	3.25781	3.38578	8.39439	3.6606	1.79349	4.47064	4.03635	4.92769	2.5556	3.96035	4.78761	6.50383	1.4449	5.15649	3.10979
43	2.25857	2.97886	3.49454	3.80747	2.76613	2.58794	4.6307	3.91174	3.51804	3.58913	4.0214	4.67868	5.54201	6.65519	5.56503	5.49006	3.99668	1.81311	3.47657	1.37377	1.00009	43	0.495233	5.36044	8.46089	4.94748	2.74738	4.51745	3.29698	6.27008	4.77516	-1.12659	2.25399	4.34031	8.61739	4.67076	1.48989	5.24324	3.95054	3.61113	3.75193	4.44723	6.00552	6.65684	1.69034	5.74917	2.62605
44	1.78582	3.86357	3.30255	2.65234	2.25533	2.34647	4.62457	4.08533	4.16597	3.05824	4.42282	4.70353	6.11648	6.79454	5.23305	3.98429	4.37558	2.04678	3.8973	2.55258	0.999123	44	0.673315	5.18231	8.12235	2.90262	2.69568	5.05201	3.45438	4.69895	5.89194	-0.919603	1.86777	3.1435	6.98192	4.72148	0.801986	4.12305	3.91781	3.1062	3.0597	1.50706	5.34756	7.81608	2.25469	4.53098	2.6939
45	2.44204	3.5315	1.26947	3.80333	2.70971	2.7157	3.54671	3.81785	4.46921	3.57866	3.7559	4.32151	6.41248	5.75776	5.60048	4.37514	5.25515	3.03346	4.18945	3.26182	0.485553	45	0.0446616	5.16948	8.74243	4.46562	2.21106	5.02261	3.05552	4.0914	5.53443	0.179726	2.83438	2.69965	7.97128	4.52235	1.89376	3.72927	4.60914	4.70901	2.40803	3.90488	5.6576	7.86579	1.97861	5.29492	3.60163
46	2.58401	2.8205	3.53696	2.69045	3.19749	3.10558	3.89492	3.74469	4.47095	3.54685	5.1473	3.83875	5.4703	5.88843	6.00659	5.26485	5.22167	3.07182	5.27372	2.10646	1.69794	46	0.613272	5.66287	8.14807	4.6375	1.95853	4.79611	4.00684	5.11085	4.84674	-0.933593	3.08581	2.66778	6.16842	4.08065	1.5061	3.42109	4.78787	4.23196	3.51725	4.08169	6.09572	5.65954	1.32584	5.14131	3.04435
47	2.50436	2.73739	3.71256	3.00122	2.57381	2.51785	4.15143	5.5796	4.13919	3.13283	3.5511	4.76358	7.03451	6.39976	5.65514	5.45685	5.52678	3.21708	4.88668	2.04978	1.30353	47	0.47331	5.70167	8.10075	4.15792	2.2136	4.02518	2.56332	4.97211	4.60787	-1.1593	2.17437	3.29375	7.30833	5.02162	1.79808	4.58925	3.96024	3.65398	3.14242	4.48107	6.12452	7.45683	2.22196	4.77806	3.40892
48	2.83997	2.15711	1.74499	2.40885	2.45226	2.81897	4.03858	3.81928	4.99583	2.95522	3.46502	3.91167	7.33511	5.78191	6.25287	4.16521	4.78736	3.51811	2.68559	1.31642	1.05816	48	1.34149	4.45836	8.70156	4.70661	1.52919	4.45644	3.09017	5.31268	4.94982	-0.756605	2.6404	2.79376	8.72053	4.06598	1.35004	3.60752	4.2844	4.3886	2.70476	3.89814	6.40443	6.79843	1.70548	4.45032	4.23823
49	2.78209	1.28553	2.81519	2.57183	2.37649	2.73027	2.94532	4.55321	3.89725	3.31532	4.00641	5.44004	6.8253	6.38337	5.55678	5.50824	4.98024	3.1656	3.67226	2.86618	0.924768	49	0.591259	5.47231	8.00902	4.19553	2.49543	5.5648	3.40682	5.7076	5.77775	-0.602504	2.6187	3.71926	8.82652	5.23589	1.38067	3.4336	4.68465	3.20594	4.80674	4.27569	6.51532	7.75459	2.2483	5.47195	3.15053
50	2.25387	4.16805	3.5203	3.06006	2.56112	2.15091	3.59658	4.3111	4.24777	2.98338	4.76812	3.67695	6.42737	6.41412	5.25364	4.3174	6.32162	3.48075	3.3952	2.04094	0.0172128	50	1.00462	5.36343	7.13249	2.78777	1.43069	3.86991	3.41607	5.51433	4.63534	-0.674284	2.81648	2.29934	8.26506	3.87477	1.52963	3.92729	3.8334	4.20561	3.62096	3.14857	5.80021	7.5179	1.70045	5.37073	3.25599
51	3.65141	1.23823	3.74125	3.03861	3.14443	2.93091	4.3491	3.66219	4.56992	3.60829	2.8192	5.03069	6.81201	6.00985	5.63209	4.24488	4.87161	4.04519	3.96209	3.10531	1.5398	51	-0.596794	4.78898	8.63112	4.14937	1.49873	3.93184	3.46532	4.57613	5.6898	0.385214	2.19723	3.85567	9.2499	4.43896	2.26669	3.58783	5.71053	4.37694	3.19573	4.15127	4.84234	8.15153	1.0298	4.21168	2.2735
52	3.26185	2.71319	4.16162	2.87303	2.29126	1.82676	3.82151	4.9712	4.73279	3.2673	5.00115	3.60564	6.16452	5.76674	6.41111	5.21611	5.26922	2.83354	4.16183	1.83951	1.42549	52	0.436071	4.29198	7.37794	3.64367	2.33097	3.96827	3.86573	4.97841	5.54892	-1.07145	2.73037	3.71512	8.117	4.85078	1.36145	4.42335	4.19667	3.83471	3.32866	2.65512	5.10073	7.1267	1.33046	4.71721	2.22396
53	2.41348	1.95845	4.20208	2.36411	2.10992	2.36819	4.27534	4.96477	5.12718	2.89297	4.48644	4.19461	6.6411	5.31952	6.42167	4.31322	5.06036	3.3347	4.17718	2.35116	0.673098	53	-0.0401734	4.89589	5.3964	4.43692	2.04001	3.96892	3.2764	5.19974	4.57052	-0.161965	2.04554	5.44418	6.89759	4.36844	1.81922	4.16459	3.81101	3.99235	3.22431	3.49768	5.72586	8.23044	1.52784	5.98097	2.86977
54	3.2379	2.80624	4.05748	3.07629	2.67709	2.40858	4.02351	4.53476	4.06858	3.50461	4.40912	5.5695	6.13033	6.37109	6.39189	4.04678	5.33397	3.09686	5.13288	3.43812	1.78407	54	0.656788	5.58809	7.89085	3.58816	1.94085	4.99818	2.74612	4.80592	5.56174	-0.470262	2.0381	4.01461	7.54422	4.92014	1.64046	4.42733	4.86917	3.5916	4.52637	4.37171	5.78003	7.10704	1.91478	4.91008	3.84383
55	2.25116	4.60992	3.50585	2.92212	2.30707	2.20134	4.27669	4.80715	5.20884	2.89953	5.38092	4.558	6.61304	5.7348	4.41586	4.50213	4.86105	3.93583	4.35316	2.42872	1.84469	55	0.752934	5.05541	8.27181	4.54454	1.93498	3.66172	2.52786	4.4007	4.57293	-0.227762	1.94062	3.51139	9.07211	3.9361	1.44704	3.27238	4.78275	3.90326	4.33943	4.11379	5.82851	6.99962	1.06809	5.21674	3.0273
56	2.03413	2.20404	3.31385	2.03547	2.47255	2.06101	4.12791	4.98523	4.28068	3.57976	4.24744	4.26978	5.80008	6.28453	5.8056	3.72964	5.07499	3.88021	4.20063	2.33114	1.71448	56	0.617814	5.3353	7.42239	4.39133	1.96537	3.8162	3.05279	6.02339	4.56129	-0.325282	3.05171	4.12748	7.49359	3.37046	1.62547	3.22667	4.9647	4.28205	4.3091	4.58762	5.28686	7.44344	1.87849	4.93493	3.31186
57	1.88607	2.79002	2.73724	2.48596	2.92904	2.69469	4.97714	4.66794	4.94618	3.11549	4.38537	3.69795	7.57653	5.9776	5.96598	4.75107	4.63416	4.12747	4.57797	2.22915	1.77184	57	0.62496	4.45119	6.7067	2.77735	2.1206	5.26046	3.09207	5.65215	5.63427	-0.992409	2.16513	2.49263	8.3656	3.60113	2.36164	3.84457	4.06166	4.13642	4.73379	3.39448	5.46738	8.06157	0.597723	3.88967	3.43126
58	3.26104	3.00922	4.31217	3.48133	2.93724	1.84355	4.58652	4.3966	4.29305	3.99541	5.08101	4.80351	7.38871	6.24858	5.86864	4.17474	5.68579	2.67789	3.95862	3.80891	0.826848	58	0.722905	4.7636	8.54156	4.99021	1.4053	4.27447	3.64148	5.90744	5.98811	-1.17021	1.76963	1.75561	7.28636	4.15896	2.23596	4.17993	4.96407	3.3389	4.21691	3.85714	6.45804	6.24042	1.48032	5.5728	3.71274
59	2.83361	2.70902	2.18831	3.35849	2.95389	2.63988	5.29555	4.22443	4.78059	2.67877	4.19875	5.23756	6.05369	5.86908	5.47116	3.68556	5.28782	2.69133	3.95422	1.91369	0.520155	59	1.14792	4.40429	7.05546	3.66947	2.67614	5.00661	3.70016	5.99377	4.54291	-1.34908	2.59167	3.94489	8.07486	4.34696	1.94741	4.58047	4.83294	4.31383	3.95636	5.09895	6.62388	7.74925	1.47092	4.18295	2.77971
60	1.85008	1.67543	2.9839	3.92329	2.0017	2.36172	4.27136	4.78747	4.47288	3.9353	5.92144	5.85794	6.37916	6.52005	5.87063	3.27068	5.64288	2.57854	3.86463	1.16525	2.53449	60	0.871664	5.16581	7.78117	4.61748	1.61732	3.9974	3.53358	5.89593	6.33364	-1.35044	2.67917	3.28817	7.103	3.1748	1.3646	3.56106	5.16361	5.47942	3.86278	3.38476	5.05436	8.09132	1.20938	5.25851	3.20765
61	2.61871	2.96362	1.59155	2.92622	2.6634	2.3728	4.35578	3.90939	4.60869	3.42316	2.99241	4.94926	6.49446	6.0354	4.93318	4.57314	5.31318	3.57879	3.04299	2.15088	2.35197	61	1.27042	5.88762	6.8107	3.95126	2.41572	4.75978	3.39019	4.60384	6.08397	-0.889426	2.53219	4.58846	6.72084	3.76598	2.18947	3.90576	4.8994	3.0055	4.32439	3.82733	5.97795	7.03487	1.65111	5.22417	2.53664
62	2.80236	2.68298	2.39818	2.34734	2.51497	2.54006	4.86744	4.68314	4.77194	2.14868	4.17833	3.52425	5.74726	6.23985	5.73835	4.9559	3.9621	2.11003	3.20418	2.2585	2.66935	62	0.695247	4.12958	7.58721	4.83904	1.94203	4.40016	3.05458	5.86889	7.18586	-0.820344	3.25667	1.97718	5.77818	3.72593	1.42888	4.42938	4.80278	4.11506	3.32383	3.00588	4.91922	7.40031	1.64037	5.8561	3.68163
63	3.70919	2.26144	3.60673	2.41094	2.49034	2.07944	4.86736	3.36267	4.81452	3.18986	3.84687	4.46145	6.83472	5.80054	4.78773	3.25347	3.70964	5.04169	4.45831	2.34822	1.89327	63	0.139239	5.4268	7.74231	4.33404	2.62939	4.40943	4.08667	5.19665	6.01108	-0.437677	2.64242	3.62792	8.61865	3.04998	0.684671	3.332	4.42779	3.37352	3.84451	3.80449	6.18689	7.83611	0.796914	4.93112	2.96536
64	1.69989	2.15115	3.3882	3.52175	2.12218	2.20625	4.31374	3.6635	4.80644	2.57232	5.24331	4.09664	6.8116	5.73258	5.12444	4.27074	4.74306	2.35973	1.93125	3.6063	2.46741	64	0.797519	4.22297	7.93273	3.54463	2.73692	3.30182	3.50223	5.01123	6.23772	-1.06046	2.81975	3.9255	8.63044	4.02337	2.165	3.71578	4.34581	3.74023	3.58127	4.19038	6.46431	8.03785	1.21043	5.44347	2.87396
65	1.88197	2.26722	3.88295	4.06403	2.32154	2.57	5.05283	4.48484	5.354	3.27582	3.12965	5.47077	7.18774	6.42231	5.85264	3.96556	3.29947	3.72028	4.06345	2.77055	1.94089	65	0.358261	3.93724	6.81123	3.95993	2.65542	4.15414	3.37492	5.09699	5.50712	-0.975825	3.24342	3.50289	8.26505	4.16867	1.68765	4.42972	5.48309	3.52629	3.8327	4.66943	6.43258	7.25582	1.1884	5.05798	2.73718
66	2.96619	2.07729	3.40891	3.28546	2.66406	3.27582	5.39457	4.32374	4.61939	2.53915	3.36283	5.17933	6.13353	6.75364	5.9371	4.2944	3.20691	4.50534	3.26419	2.09607	0.680868	66	0.717723	5.15305	7.90597	3.51053	2.47633	3.47595	3.63152	4.74563	7.62759	-1.63761	3.5081	3.9302	7.96407	3.18541	1.42093	3.44351	3.42555	4.13604	4.22503	3.65187	5.90853	7.41772	0.00284822	4.02512	1.6643
67	3.10759	2.80305	3.72018	2.90378	1.97552	2.18878	4.41912	4.07696	4.74118	2.74866	4.85728	5.71521	6.41307	5.939	4.98127	3.72953	4.83382	3.32662	4.40753	2.84422	1.89417	67	0.681664	4.81179	7.80202	3.30459	2.70097	3.96097	3.97692	4.32948	6.31381	-1.15158	3.85854	3.09476	7.37543	3.83674	1.31293	3.72765	4.71529	3.60806	3.78833	3.34137	5.80404	8.45052	1.72684	4.88913	3.5127
68	2.50818	2.31319	3.03387	3.69233	2.71814	2.81374	4.45624	5.56792	5.27781	3.18544	4.44926	5.03358	5.1994	5.26609	6.01179	4.13281	4.35206	2.06593	4.04239	2.54261	0.126926	68	1.16206	4.48445	8.10272	3.90477	2.38713	3.67322	2.9046	5.15219	6.47315	-1.06013	4.11769	4.01384	8.64222	4.07626	2.29281	3.77908	4.38545	3.858	4.32712	4.54312	5.91605	7.22807	1.37351	4.67497	2.55083
69	2.20307	2.86531	4.38802	2.7749	2.59722	2.43325	5.19893	5.35347	5.4577	2.60381	4.6806	6.02061	6.8562	5.54596	4.39622	4.69051	5.53247	4.50747	3.71328	3.8321	0.218967	69	1.2049	5.50506	8.66373	3.91399	2.62707	4.15721	3.5407	4.82412	6.86028	-0.501436	3.31872	2.87231	8.04287	4.72265	3.14124	3.3341	4.90507	4.06432	3.12135	2.97069	5.93165	7.58536	1.70493	4.77111	4.38613
70	3.12108	2.01342	4.46543	3.14509	2.51195	2.70784	4.80032	4.64331	5.39723	2.7836	4.69221	5.55197	7.04478	5.34037	5.73913	3.45692	5.5677	2.94511	3.68496	2.42415	2.35609	70	-0.48765	4.97143	6.82391	3.28112	1.64779	4.31986	3.47655	4.60817	6.84958	-0.561511	2.25384	3.40443	7.65861	4.2027	0.941951	2.99394	4.80798	3.58992	3.86269	4.03607	5.71574	7.30053	1.30235	4.49153	3.9307
71	2.88068	2.77632	5.20735	2.73238	2.62604	2.1397	4.39789	4.44178	4.09647	1.76002	4.83042	5.35809	6.39301	5.15165	4.933	3.87956	4.92127	3.65563	2.63893	3.08606	2.91719	71	0.464862	3.84488	8.78335	3.8106	2.09578	3.79233	3.59543	4.29203	7.1172	-1.02272	2.54163	3.0899	6.35942	4.40859	0.963687	3.74567	4.67089	2.96534	3.40229	4.75849	5.18478	7.01939	1.16963	2.78389	4.03015
72	3.41724	0.246762	3.35816	3.51754	1.91896	3.06412	4.98345	4.4395	3.69939	2.97808	4.26441	4.8913	6.80506	5.56382	4.0943	4.32466	4.51865	3.65633	4.50498	3.10883	2.44959	72	0.750392	4.44407	7.03982	3.79605	2.38802	3.71909	3.26118	4.53036	6.69941	-1.53758	3.48279	2.05879	7.22558	4.1258	1.82091	3.72579	5.0235	4.02875	3.27872	3.96643	5.93602	7.61857	2.38566	4.57928	3.71931
73	2.63356	3.64614	4.40504	3.01494	2.28735	2.42632	5.25977	4.48325	5.08398	3.19524	4.51393	5.397	6.53923	6.15139	5.20152	4.12816	4.39824	4.25205	4.75541	2.91289	1.44776	73	0.480899	5.3209	7.08039	4.20282	2.59503	3.84442	2.42956	4.2492	6.55402	-1.32978	3.96394	3.01	8.13376	4.69043	2.04804	4.27833	5.58997	4.23338	4.02855	4.27943	5.33008	5.43032	2.01466	4.62826	3.27865
74	2.10665	1.62515	5.29309	2.46655	2.56171	2.377	4.53013	5.22864	4.65303	1.87039	2.88371	5.87174	6.49808	6.86554	5.4072	4.89837	5.89032	4.33988	3.51978	3.50114	1.35156	74	0.624658	4.7708	8.17928	4.20637	1.94397	4.88024	3.75528	5.65085	6.60196	-1.7198	3.69599	3.80718	7.06939	3.14463	1.48216	4.01099	4.5046	3.84508	4.0932	3.88363	5.70752	5.65244	1.16245	4.15035	3.16335
75	3.0492	2.65771	4.5358	3.14312	2.76103	2.76756	4.85991	3.99526	5.68564	2.41582	4.39064	4.57895	6.45541	5.98184	5.54012	2.87179	4.89415	3.39641	2.87436	2.64417	2.36082	75	1.56151	4.60907	6.41807	2.49142	3.31383	3.95163	3.8813	5.25948	6.55175	-0.989886	3.93823	2.45605	6.97986	4.60105	2.47085	3.51811	4.21719	4.65757	2.98508	3.4955	5.73277	8.27716	2.14684	5.29506	2.99493
76	2.3665	1.58446	4.16355	2.90754	2.72013	2.88612	4.37278	4.52649	5.50144	2.01653	4.71922	3.14384	6.59503	5.62828	4.17141	3.08177	4.07999	4.01961	3.82054	2.17372	1.16045	76	0.197534	4.77325	7.89246	4.58518	1.74266	3.95682	3.19676	4.71891	6.76726	-0.739386	3.19594	2.06435	9.16717	4.42836	2.13101	3.77751	6.0566	4.00234	4.24808	4.50434	6.04207	8.07035	1.50547	4.95078	3.72615
77	2.56182	2.87723	4.2211	3.4193	3.18816	2.27806	5.90697	4.47788	4.6077	2.68835	3.90088	5.85552	8.18533	5.68296	4.73584	3.45049	4.65104	3.81954	4.45023	2.79035	1.27314	77	0.0517027	4.83141	6.21019	4.18713	1.5066	3.38549	3.04018	5.07316	6.54052	-1.0849	3.58281	3.59506	7.86521	4.10482	2.12446	3.23718	5.58449	4.54844	3.42172	3.34759	4.71584	7.83727	1.94275	5.29443	1.96828
78	2.4815	2.50566	4.1196	3.47032	2.65008	3.0757	5.12898	4.27569	4.86769	2.95382	3.60755	3.13929	6.10815	5.51404	5.90459	3.83894	4.08216	3.85447	3.77259	2.52336	2.80917	78	0.536409	4.87402	6.09288	4.54034	1.94746	3.70071	3.54207	4.17797	7.17295	-1.29249	2.8314	4.35608	8.32036	3.88903	2.04349	3.59823	4.72932	3.23209	3.34528	3.40368	6.30015	7.22858	1.47351	4.21214	3.31341
79	2.13933	3.37587	4.14049	3.4004	2.28104	3.84659	3.6906	5.70121	4.96409	2.2114	2.32155	4.43801	7.04489	6.0148	6.10806	5.24774	3.86983	2.98261	3.02091	2.36863	1.87748	79	0.154186	5.91701	8.09368	4.22793	2.69576	3.78714	3.81458	4.95103	5.43657	-0.797174	3.52375	1.52659	7.84791	2.88665	2.26423	3.40163	5.72695	3.59603	2.61641	4.07063	5.81886	7.55929	2.30022	5.08145	1.24145
80	3.82708	1.96745	3.96139	2.25224	2.70674	2.93372	4.0203	4.46629	4.45436	1.86877	4.60706	5.17075	6.47098	5.07727	5.0318	3.55288	3.19349	3.27453	4.77067	2.79968	1.33165	80	0.1795	4.63613	6.5833	4.3512	1.81815	3.55151	2.67231	5.96864	6.52146	-0.302486	3.98342	3.46394	7.83103	4.66536	1.38018	3.9839	4.52897	3.54852	3.77988	4.42873	5.66909	6.90161	1.12135	4.79771	3.1967
81	2.43593	3.33588	2.43554	3.1244	2.28155	3.02931	5.02603	4.7438	4.56246	2.53914	3.78328	5.21228	5.99121	5.77781	5.34651	1.24049	4.082	3.46632	2.30782	2.70635	1.15719	81	-0.258245	4.74124	7.17976	3.45729	0.866875	4.55068	2.4966	5.7039	5.95706	-0.490001	4.50692	3.4243	7.12315	3.10522	2.19167	4.03807	4.42704	3.67866	3.97434	4.68631	4.75647	6.80183	1.18092	4.88916	2.8228
82	3.61702	3.00376	4.99949	2.6094	2.43859	2.35071	4.53768	4.22676	4.97962	2.28583	4.27413	4.36873	5.49453	6.47371	5.33575	3.10536	4.70983	4.42185	4.30498	2.05376	2.42257	82	0.331224	5.32192	6.04078	4.48705	1.10618	4.26804	2.96288	4.7739	6.30654	-0.705855	3.30181	4.20714	8.67848	3.81408	1.56519	3.83516	4.96101	3.76728	3.12125	4.36537	5.93179	7.08298	1.07134	5.70049	2.75662
83	3.36411	3.20513	2.58101	3.82157	2.50968	2.86905	4.70673	4.15028	4.95143	3.0201	3.68946	5.45823	5.16966	5.43038	6.08265	3.66156	3.65037	3.17333	4.11177	2.30221	1.90614	83	0.51615	4.09445	7.75331	4.0678	1.66718	3.73073	4.00868	5.02855	7.4249	-0.795606	4.12672	3.71514	8.02674	4.26437	2.05167	4.46288	5.71509	3.92745	4.02623	4.84916	6.18279	7.21854	1.49492	5.58087	4.5755
84	3.31641	2.91543	5.48069	3.00161	2.70487	2.43934	4.55279	4.84599	5.48587	2.14056	3.56336	5.62529	6.0217	5.0898	5.68934	3.70966	4.44722	3.6892	3.4946	2.23488	0.718547	84	0.643967	4.8499	6.58262	4.51277	1.67592	3.92131	3.66041	5.36041	6.79049	-1.51089	2.79346	3.21124	7.72688	3.75905	1.3135	3.97953	4.8239	2.81863	4.60155	4.52032	4.6977	6.9183	0.744571	5.33818	2.77211
85	3.35509	2.82705	2.24035	2.81588	2.77399	3.06476	4.60106	5.33161	5.17341	2.77128	4.46843	4.66918	5.46536	6.11001	5.64325	3.09782	5.14703	3.50658	3.03057	2.93626	0.835597	85	0.0510512	4.50394	7.19223	4.57284	1.88153	3.42082	3.58296	5.49604	6.51079	-1.24307	3.48965	2.46886	8.54843	3.73673	1.6521	4.91722	5.53502	3.3854	3.2914	5.21205	5.6232	7.25412	2.1236	4.6734	2.50255
86	2.29119	3.04453	3.31222	2.91986	2.45422	3.18076	5.07005	4.37343	4.42927	2.93618	3.26676	4.81498	6.68353	5.64386	6.78017	3.46923	4.83299	3.25478	3.56068	2.95297	0.757151	86	0.487853	3.93341	7.51033	3.71327	1.09858	3.99379	2.90525	5.13899	5.84913	-1.02271	3.54122	3.32516	6.83931	3.159	2.08836	4.29016	6.05729	2.8125	4.0777	4.7059	5.42759	7.58748	1.50559	4.81424	2.28111
87	2.16819	1.74146	3.09784	1.49224	2.35699	3.08623	4.19829	4.79116	4.49122	2.97736	3.886	5.78212	6.26898	5.65001	5.17501	3.83606	5.14044	3.61413	4.01042	3.40431	0.747471	87	0.22143	4.1887	7.33979	3.43869	1.80978	3.6771	2.96392	5.0655	6.57908	-0.685835	2.61503	3.66911	7.83395	3.5206	1.77959	4.54012	5.09785	2.95181	2.34034	3.47201	5.74773	7.62096	1.75529	5.57703	2.63965
88	2.99277	2.31029	3.52182	3.17248	2.52691	2.76656	5.06927	4.99092	5.43307	2.51278	4.69378	5.24259	6.23186	6.03216	6.06267	3.11846	4.60816	2.93973	2.89363	2.29719	2.05201	88	0.891508	5.60906	7.05365	4.91017	0.818941	3.55782	2.95866	4.94551	6.94038	-1.00099	2.74706	2.4687	9.48687	3.55059	2.57446	3.79829	5.20062	4.12633	2.95777	3.45039	5.1444	7.75414	1.60576	5.26707	3.27976
89	3.06	2.50251	2.97213	3.35051	2.40784	2.03158	4.86232	3.65666	6.13634	3.21559	5.13373	6.28885	6.04	5.29736	4.03033	3.30052	4.91006	3.69416	3.18892	3.41228	2.35449	89	0.430463	5.06234	7.80213	4.60733	1.1406	4.15667	2.62165	5.28213	7.30018	-0.0906816	2.99489	3.16429	8.24745	3.32481	1.2562	4.4316	5.24196	3.93578	3.29879	4.26013	6.94068	6.69733	1.16611	4.96683	2.81912
90	2.27716	3.69187	2.62925	2.93806	2.12258	2.0646	3.57672	4.28213	4.71218	2.85031	2.6709	6.05272	6.09461	6.06714	6.00808	4.09146	4.21493	4.134	3.79762	0.877126	2.26241	90	0.186753	3.87042	7.72854	4.88497	1.89736	3.90627	3.56126	5.77567	6.74412	-0.467917	3.57588	4.23733	9.51861	2.63409	1.52267	3.17145	4.58058	3.57481	3.55039	3.95388	5.78567	7.28372	1.80541	6.08279	4.37601
91	2.57004	2.60555	3.09251	2.56227	1.92463	2.92879	4.87218	3.44339	4.70895	2.35833	5.46513	5.75651	6.61556	5.14274	7.11661	3.55336	4.1115	3.24358	3.52473	3.02862	1.77308	91	0.958425	4.85218	6.36231	4.40342	1.25922	4.12197	2.9311	6.3687	7.07239	-1.03735	4.03332	3.37754	8.14025	3.05391	3.48045	3.55935	4.54938	3.28145	3.37768	4.20325	5.75217	6.8848	1.12792	5.0799	3.18603
92	3.44221	3.21407	2.92579	2.94135	2.69014	2.43339	4.68224	4.48271	4.61571	1.83498	3.22506	3.77688	5.74631	6.38534	5.99231	2.32066	4.43895	4.40722	4.19822	1.6767	1.95913	92	0.363428	5.73372	7.8106	4.88175	1.78303	2.85701	3.61914	5.0268	6.4818	-0.564877	3.04178	3.82183	8.29474	2.97485	1.87777	4.61498	5.19778	4.77864	5.03044	3.98038	6.61864	6.57248	1.97617	5.04327	3.28955
93	2.81179	0.857903	3.03523	2.68223	2.59559	2.70556	4.099	5.21031	4.99531	3.12958	3.93565	5.81136	6.65228	5.35519	5.81351	3.29182	4.71101	3.31621	3.98349	2.09126	1.8649	93	0.64619	5.37072	6.66052	4.49411	1.87168	3.75438	2.22406	5.64932	7.10151	-1.36804	4.22713	3.03153	8.44036	2.57161	2.60823	3.93117	5.07272	4.14066	3.15749	4.85906	6.22509	7.12752	1.61712	4.84734	2.85946
94	2.52148	3.05373	3.39154	2.64279	1.94923	3.09391	4.2343	4.79446	4.49341	3.1726	4.04364	6.02677	4.94838	4.69678	6.16749	3.72626	3.43331	3.87085	3.57485	1.9403	1.95134	94	0.659477	5.03217	5.48502	3.70737	1.58148	4.31426	2.95308	5.46273	6.62783	-1.84291	3.16313	2.33244	7.18323	3.81896	2.47107	4.13979	5.58238	3.56237	4.32552	2.94365	6.07612	7.25104	1.14685	5.16377	2.74191
95	2.91935	2.84525	3.71318	3.08668	2.98847	3.27868	3.87981	4.09181	4.79762	3.08649	3.83754	5.61811	5.12034	5.38353	5.61808	2.87191	4.66641	4.02521	4.04511	3.09479	1.07019	95	0.64691	5.24368	6.45047	4.04832	2.43589	3.28605	2.92439	5.31586	6.18095	-1.2574	3.31305	2.51907	7.92605	3.30396	2.47372	4.24188	5.10705	3.03648	3.872	4.11157	5.15419	7.20752	0.966521	5.31271	3.2068
96	3.37946	2.82544	4.0364	2.79092	2.3763	2.67587	5.92894	4.76048	4.5226	2.99994	3.77254	5.8804	5.94948	5.86088	6.39332	3.33415	4.13936	4.50076	3.91358	2.03716	0.815303	96	0.0962698	5.04266	7.48803	4.57758	1.66338	3.55748	2.87148	5.21523	6.11537	-1.56791	3.0542	3.00581	7.76832	3.19688	1.935	3.56951	4.28841	4.07107	3.31983	4.00373	6.07303	7.16191	1.45025	5.84915	3.58124
97	2.87678	2.44316	3.05771	3.12555	2.52354	2.98279	4.62482	4.69709	4.73733	2.05303	3.33889	5.8541	6.92166	5.48857	6.00918	4.20417	4.93408	3.45565	4.45688	2.41915	2.04368	97	0.265878	4.33627	8.43792	3.79884	1.75822	2.9867	2.20565	5.81243	5.92647	-0.946824	2.67554	1.60935	8.50053	4.30476	2.19082	3.75651	4.93981	3.10207	3.77691	3.86209	5.07867	6.52885	0.901029	5.18239	3.56404
98	2.39364	2.71477	3.64856	3.07449	2.36239	3.29094	5.49121	4.61981	4.03392	3.14292	3.52703	6.25416	6.69458	5.20963	5.41603	3.13815	4.77698	4.03939	5.15491	3.0632	1.70659	98	0.704	5.52249	5.6332	4.1236	1.9146	3.0995	3.2148	4.98494	5.97699	-1.90377	3.76369	3.60915	9.23358	3.20373	2.13445	3.92633	4.69315	3.74366	3.63712	4.76157	6.52972	7.15111	2.21997	4.92022	3.63012
99	3.60958	3.00833	5.62016	3.11937	2.4623	2.82097	5.04064	4.45351	5.71665	2.7423	3.77346	6.45049	6.52002	4.56663	6.17752	3.69983	4.50604	3.12399	2.98361	2.60661	1.89626	99	0.657215	5.06838	7.65599	3.56414	1.65039	3.24551	3.26716	5.53616	6.48906	-1.16278	4.05266	2.65276	7.12309	4.29304	1.83056	4.01806	5.4176	1.29752	3.30473	4.01204	5.52617	8.19328	1.92679	5.27161	3.40381
100	2.87579	2.44543	4.55614	3.13888	2.77368	2.82755	4.13256	4.58879	4.81686	1.17778	4.01683	5.94956	5.75007	6.10138	6.69191	3.61367	4.10988	3.46702	4.3985	3.9376	2.09535	100	0.336367	4.95415	7.72384	3.05676	1.58318	3.69678	2.94459	5.12963	6.95446	-0.82583	3.43272	4.69161	7.72752	3.75556	2.05184	2.99245	5.01358	2.99165	4.12514	3.7811	6.59675	7.51377	1.73502	3.96511	3.26662
101	2.74681	3.36883	3.11175	3.45024	2.54485	3.26107	3.70653	5.55083	4.64178	3.14458	3.56537	6.41512	5.35696	5.48974	5.47385	2.8685	4.13191	3.48069	4.3089	2.54993	2.39146	101	0.849973	5.67621	7.68728	3.75474	1.63657	4.14348	3.20966	5.26261	5.51631	-1.53783	3.9821	2.41052	8.89049	4.08662	2.47265	2.79579	3.95489	5.51927	2.66392	2.75119	6.22596	7.7158	0.884715	5.655	1.84915
102	2.90416	1.97879	3.3732	2.35557	2.33984	2.80259	3.78557	5.00098	4.66871	2.74906	3.86954	5.72306	6.10032	5.57465	5.50271	4.60124	4.23495	3.87842	4.14848	2.75742	1.8509	102	0.623014	5.39338	7.59946	3.59352	0.993042	3.68177	2.52513	4.45057	6.09053	-1.02709	3.59482	3.40777	8.54708	3.84139	2.90635	4.17209	5.54596	4.98665	3.1596	4.74648	5.96053	6.35767	1.0282	5.92831	3.5858
103	3.5598	3.31641	3.6044	2.82085	2.48089	2.27115	4.19186	4.69927	4.78567	2.79114	4.36124	5.80248	5.67209	5.95029	5.60681	3.38493	5.38039	4.48675	3.83212	3.0334	2.70239	103	0.110281	4.23566	7.00585	4.22955	2.09619	3.43403	2.74912	4.71944	6.70096	-1.06256	4.25706	2.10002	8.24052	2.44341	2.13996	4.04522	5.21028	5.23291	3.30673	3.40423	6.01553	7.53274	1.39712	5.39407	3.52459
104	3.05711	2.18374	4.61868	2.60113	2.7664	3.20444	4.5781	4.47807	5.23403	2.62268	3.23808	5.25093	5.60354	6.25697	7.07586	2.62514	3.97689	4.21532	3.22914	2.55589	1.66152	104	0.296692	4.69746	7.89616	3.87111	0.795097	3.47232	2.34502	5.35102	6.83815	-0.736054	2.83688	3.00564	8.61105	3.38993	1.59666	4.43155	4.63724	3.41431	2.52962	4.48152	5.46958	7.78655	1.30089	4.88633	2.99291
105	2.6187	3.72017	2.215	2.23573	2.77784	2.09645	4.99777	5.00418	4.03972	1.51008	4.48482	5.81497	5.26668	6.10887	5.91033	4.35876	4.47526	3.30084	3.55559	2.62168	3.24579	105	-0.156438	5.14218	7.69042	4.40589	0.846315	3.96963	1.94667	5.11591	6.27565	-1.60954	3.10202	2.73291	7.7782	3.06582	2.28082	4.18842	4.31743	4.78283	4.14621	4.86436	6.46655	5.87498	1.85171	5.59806	2.62215
106	2.76636	2.52528	3.84772	2.98592	2.30677	2.78017	4.96022	5.13773	5.62321	1.98384	2.43019	5.32663	6.48271	4.99989	6.12209	2.77839	3.02341	3.21535	3.65794	2.53591	1.5594	106	-0.0496722	4.48075	7.15568	3.81817	1.1717	4.21325	2.51158	3.38322	5.14068	-0.782997	2.66086	3.37686	8.7418	3.11673	1.83741	3.2234	5.11155	5.18733	2.94264	4.11935	5.47034	6.75107	1.50622	5.75817	3.58118
107	2.43202	2.23271	3.38157	2.51902	2.11743	2.66155	5.29939	5.4576	4.90495	1.52762	3.13644	6.42569	6.40777	5.90274	5.50086	3.38352	4.55774	4.65784	3.78303	1.76903	2.11243	107	0.420191	4.1444	7.39675	4.68814	0.941869	4.18316	2.93789	4.38472	5.8446	-0.563952	3.07198	3.67017	8.47049	3.3867	2.59426	2.99559	5.1412	3.38687	3.29633	4.15733	6.57403	7.30632	0.454726	6.1205	3.23908
108	2.55324	2.69225	4.64398	2.07883	2.27945	2.76966	4.64416	4.11251	4.72297	2.39515	4.57524	4.83299	5.55711	5.64033	5.26192	2.13336	2.88227	4.10988	4.88314	3.29431	1.59691	108	0.196832	5.14436	7.19248	4.56625	0.66042	3.66831	2.89406	5.20372	5.43811	-1.36973	3.93116	3.11812	8.19475	3.08864	1.46956	2.68078	5.17699	4.51116	2.28374	3.80635	5.18163	6.71101	1.75221	5.73745	2.66125
109	3.42808	1.77419	2.5539	2.69939	2.81107	3.17118	4.28366	5.60393	4.73293	3.50507	3.6894	6.02176	5.6754	5.78043	5.02676	2.84769	3.97541	4.17777	3.46865	2.7505	1.95983	109	0.516093	4.13816	7.35012	4.23189	1.5843	3.687	2.7252	5.32386	5.62888	-0.955117	2.29209	2.66439	7.53158	5.1849	2.21887	2.69568	6.43159	4.85774	3.14278	3.40387	5.93558	6.60923	0.794054	6.77498	2.98446
110	2.83228	2.68708	4.41804	2.26678	2.85524	2.45382	4.82215	4.51991	4.7016	2.11053	3.8065	5.37255	6.15798	5.24858	5.42095	3.45202	3.8663	3.35993	3.21863	3.55972	0.851324	110	0.466981	5.62119	7.09259	4.67539	3.18187	3.63149	2.6743	5.46978	5.65568	-1.17099	3.91078	3.9197	8.40248	4.11406	2.43776	4.13685	4.16341	3.42704	3.36152	3.40819	5.63151	6.67734	0.869069	5.72486	3.48247
111	2.34917	2.6008	2.63266	2.89649	2.5992	2.6146	4.64905	4.66657	4.37163	1.99754	4.02731	7.30519	4.78988	5.67247	5.75376	2.93688	4.99475	5.00862	4.51025	3.03451	1.10277	111	0.464832	5.10072	7.41704	3.5771	1.24363	3.96841	2.94778	4.64523	5.74871	-0.626437	3.91451	2.30042	9.91075	3.41578	2.92084	3.78741	4.14199	5.74019	4.33852	2.43549	5.80281	6.79858	1.17067	6.24815	3.13803
112	3.45026	3.495	3.35997	2.82571	1.64093	2.46244	4.93195	4.57998	4.64966	2.64031	3.38289	4.86451	5.4414	4.83745	5.27045	3.38024	4.13187	3.44937	2.73822	3.94559	2.20433	112	-0.0813889	4.32313	7.33125	4.24096	1.64518	4.1195	3.04221	4.02432	6.19133	-0.630361	2.8618	3.30209	8.14081	3.66053	2.45401	3.69024	4.71595	4.57385	2.55198	5.3755	5.33869	7.5005	0.665069	5.46397	2.53068
113	2.73812	2.46798	4.87705	3.20921	2.96722	3.27351	4.30123	3.43023	3.87444	1.9627	3.6104	6.13165	6.26945	5.82087	6.0259	3.21744	5.72647	4.66457	4.28434	3.85765	1.38653	113	0.375724	4.79152	7.60649	3.63581	1.59505	3.77897	3.14513	4.83867	5.86688	-0.937223	4.00338	4.67987	8.32107	2.52572	2.87849	4.44633	3.38422	5.015	2.85127	2.51903	5.14202	6.80503	2.2041	5.60808	2.90915
114	3.03364	4.02771	4.67664	2.57795	2.63836	3.11663	5.16065	4.74414	5.44169	2.02864	3.85973	5.62222	4.57655	5.84476	5.79484	2.33653	3.69882	3.4713	4.73164	3.54507	1.27973	114	0.397353	3.86483	6.74135	5.55917	2.04664	3.36416	2.50545	5.09553	6.08354	-0.43526	4.21653	3.20862	8.5424	4.43152	3.48303	2.34487	3.5808	4.90022	3.62942	3.61649	4.79367	7.07809	0.560978	6.78643	4.24453
115	3.43888	2.696	3.49654	3.01872	2.57965	2.77368	5.27545	4.19141	5.0641	1.31206	3.86186	5.41347	5.11609	5.55856	5.79871	2.48509	3.95636	3.86507	3.45067	1.80699	1.35085	115	0.340512	4.74328	6.89272	4.66672	1.84041	3.86202	3.10583	5.40275	6.41056	-0.742838	4.03809	3.54931	7.09866	4.41898	2.16783	2.9788	3.84211	4.54126	3.41562	3.15673	5.49234	6.09659	0.837608	4.19809	1.85748
116	3.40495	1.27827	4.17687	2.80072	2.34551	2.56397	4.75097	4.57109	4.74155	2.62646	2.1887	4.82423	4.76709	6.80112	6.08198	3.61418	4.95643	3.93109	3.48935	3.49112	0.842972	116	0.712505	3.60794	7.72824	3.44407	1.64845	4.2306	2.76468	3.5362	5.95724	-0.939439	3.83792	3.61925	8.69375	3.98725	2.54383	3.56664	6.1995	4.81279	2.38436	3.04918	5.13631	5.766	1.55301	5.52744	3.72217
117	1.84798	1.59258	3.6419	2.62567	2.8037	3.37886	4.9369	4.67198	4.81391	1.89761	3.9017	4.24691	5.81584	5.62021	5.78208	3.50872	4.40706	4.96071	4.14013	2.7	0.0988332	117	0.470024	4.40576	7.1786	4.80159	0.96689	4.11638	2.35097	4.16151	5.42255	-0.672687	3.7111	3.43386	8.77565	3.37505	2.2862	3.07999	6.04296	4.50512	4.55487	4.70887	4.3767	7.69553	1.6392	4.53268	3.5118
118	3.34027	3.6975	2.62342	3.07033	2.51792	3.09851	4.71204	4.15502	4.16653	2.27341	3.9629	5.84204	5.58362	6.37854	5.84109	2.81709	5.0511	3.04967	2.48743	3.31041	1.94625	118	0.125267	5.2776	6.50671	4.38459	0.786655	3.07823	2.88732	3.56711	6.8596	-0.68441	3.50018	2.40952	7.81666	3.61995	2.80963	3.82814	4.45163	5.5015	2.14191	3.38074	5.43929	8.09854	0.789326	4.79327	2.51084
119	2.66471	0.986983	2.32825	2.97114	2.73624	2.52425	5.2182	3.98394	4.83765	1.88669	4.35568	6.01823	5.06959	5.48274	5.22986	1.65306	4.24621	4.25129	3.4011	3.16247	0.359057	119	0.419854	4.26441	5.84657	3.72564	2.06298	3.96814	3.42409	4.08157	5.80071	-1.46199	3.89544	3.35491	6.39275	3.49049	3.32092	3.07648	5.80583	4.31516	3.92785	3.08325	4.31877	6.12961	1.32626	5.09915	3.24105
120	2.41323	3.98009	3.65456	2.52243	2.86502	3.02464	4.76942	5.30744	3.90932	2.31018	2.44902	5.76091	4.71492	5.87354	5.79739	2.94054	4.93204	4.62321	2.13333	2.81638	1.39847	120	0.14322	4.72616	6.59176	3.63901	2.41103	3.93637	2.98514	4.02971	5.92673	-0.802231	3.09303	3.75466	8.35281	4.49366	2.34644	3.79925	5.24313	5.27347	3.81754	4.23884	5.01098	7.06928	0.983431	5.20377	3.88642
121	2.44077	1.80241	2.69655	3.38486	1.92477	3.19465	4.7095	3.41723	5.33135	2.27628	4.53995	5.62688	4.75453	5.83539	6.05409	3.26819	4.16488	3.531	3.27815	4.43476	2.72947	121	0.519412	5.25937	5.41728	4.66079	1.53502	3.70589	3.62579	4.22682	5.22434	-1.18315	3.54161	3.51942	7.35215	4.30384	3.31374	3.47154	4.27335	4.53367	3.24473	3.6864	5.38752	7.653	1.47773	5.07583	2.70737
122	2.59062	2.66444	4.94551	2.22672	2.36213	3.33738	4.45118	5.0564	5.4873	2.49839	3.96863	6.02611	5.56615	6.44738	4.81887	3.32072	4.97824	3.07324	4.31548	3.06766	1.55787	122	0.0699815	4.09391	7.14218	3.30692	1.85369	4.05368	3.24087	4.59732	6.443	-1.26916	3.41193	1.2598	7.65631	4.93534	2.47585	2.54458	5.16462	4.64069	4.59902	2.55467	5.82489	6.62762	0.979972	5.98297	3.55014
123	3.60465	4.35031	3.63838	2.06643	2.35036	2.96222	4.49912	3.77392	4.43794	2.61537	3.66524	6.16476	4.91137	5.60813	5.72692	2.83597	4.62513	2.83993	2.58417	2.73707	1.66061	123	-0.201499	4.31966	7.74229	4.20656	0.799592	4.14286	3.26538	4.7179	5.44592	-1.99717	3.46399	3.85275	8.95251	5.02566	2.75544	3.69562	4.23396	5.48718	3.24724	2.34548	4.27782	7.51514	1.15494	4.62727	2.38412
124	3.85175	3.7227	3.56359	3.30662	2.47475	2.73217	5.40025	4.43123	4.71321	1.44708	4.84786	5.16702	6.51654	5.07398	5.57885	3.65397	3.56607	3.30661	2.4436	4.50107	2.0957	124	-0.148538	5.05284	7.57957	3.14458	1.64824	4.04315	2.85905	3.61647	6.44138	-2.00727	3.63526	3.67233	7.25304	4.68089	2.24377	2.75222	4.5425	5.35958	3.03184	2.89703	5.68999	7.85391	1.33175	5.65452	2.9934
125	1.9513	3.15697	5.10665	2.2825	2.68536	2.39004	4.7232	4.59148	4.72006	2.42624	4.75656	5.69928	4.76927	5.5969	4.64278	2.43644	4.64115	4.72663	3.74	2.50099	0.158392	125	0.937472	5.56733	7.29436	3.99647	1.97276	3.58996	3.33109	3.94594	6.87116	-0.784493	3.62661	2.86693	8.23429	4.29242	2.66492	3.21107	4.8111	3.53498	4.54897	3.73937	4.59957	7.8354	1.37802	5.28014	3.03548
126	2.45905	3.07781	3.13647	3.00183	2.642	2.76284	4.81091	4.37757	4.9216	2.59908	4.31545	4.9584	5.05572	5.02855	5.13455	1.99122	4.86899	3.7501	3.9093	3.89803	2.84999	126	0.548043	5.25937	6.97914	2.73835	2.0321	3.84662	3.01686	3.5823	5.41254	0.143484	2.53819	3.58497	7.35555	4.30455	2.56732	2.97133	4.80169	4.77539	2.27573	2.51806	5.92989	7.67205	1.16544	4.99067	3.60158
127	2.24114	3.26068	3.9337	2.89358	2.23362	2.37102	4.02805	4.01193	4.83226	2.40566	3.58543	4.62648	5.54294	5.68374	4.37662	3.47574	5.49032	4.28929	4.02183	3.92159	1.53985	127	0.287638	5.32563	8.46033	3.98225	1.75775	3.72337	2.77838	5.1913	5.58987	-0.984864	3.22588	2.77853	9.10843	4.91046	3.32535	2.91248	5.73373	4.92466	4.56113	2.55032	5.40004	6.88263	0.892535	5.73824	3.88805
128	2.8321	4.79358	2.98323	2.89819	2.58645	2.3349	4.36567	4.17191	3.52452	2.00619	4.33906	5.69873	3.92781	5.23669	4.7264	3.31476	4.56442	4.20465	3.47684	3.61041	1.14938	128	0.653521	5.28923	5.89049	4.22282	1.87422	4.24998	3.40474	5.03919	5.26485	-1.91216	3.61196	3.31979	6.93577	3.52451	3.0715	3.45306	5.63422	5.07865	3.66175	4.55882	5.2975	6.53318	0.86867	5.73747	3.02114
129	1.93101	3.88324	3.34734	2.68682	1.82942	2.77249	4.32494	4.32004	4.86796	2.17038	3.66911	4.49835	4.13162	5.77473	4.37102	2.71245	4.5499	3.66914	4.08155	3.00486	2.0365	129	1.14804	4.57717	7.32135	4.18776	1.03952	4.36986	2.75357	5.12339	5.59054	-1.48297	3.33389	4.20936	7.5127	3.38759	3.62549	3.25421	5.54936	4.41268	3.01615	4.4926	4.73655	6.79032	1.26648	5.67742	3.70333
130	2.43088	2.869	4.59632	2.80691	2.53806	2.44831	5.01719	4.57584	4.45888	0.678673	4.6965	6.11372	5.94412	4.85784	5.81468	3.45088	5.14773	5.33677	4.02783	3.15903	2.13404	130	-0.174802	4.90446	6.15334	3.10106	1.43638	4.18353	3.34999	4.81704	5.28544	-0.558225	3.74206	1.78532	7.1697	5.51952	2.74622	2.22937	4.53295	5.08837	2.60965	3.52729	5.64114	6.98057	1.71357	4.60792	2.94713
131	3.58006	2.01666	3.95715	2.75207	1.83194	2.76788	4.36843	3.98423	3.54035	2.31703	3.79924	5.09177	5.04484	5.51595	5.48658	1.94762	4.20775	4.60776	3.24645	3.36656	0.963272	131	0.775481	4.37913	5.6542	4.38617	1.11458	4.39185	3.06141	6.40991	5.5434	-0.957846	3.18308	1.99688	9.25462	4.25098	2.78629	2.76604	4.26691	5.67732	3.71622	4.03601	5.77087	7.4453	1.24872	3.90423	3.37697
132	3.50201	4.37766	2.69063	2.10785	2.75425	1.62688	4.97158	3.25102	4.32298	3.07525	4.37915	5.48041	4.55636	5.37905	5.71169	2.82436	5.16411	4.47503	3.63832	2.52734	1.6443	132	0.151714	5.2239	5.93219	3.93709	2.01145	4.00777	3.41749	4.15274	6.09414	-2.03125	2.99732	3.4094	9.15122	4.26125	3.35933	3.11292	4.81306	5.92271	2.9766	4.06031	4.91347	7.31559	1.11568	4.28831	2.85929
133	3.55467	2.29227	3.28814	2.88217	2.20578	3.03521	4.83866	4.76458	4.54807	3.07086	2.31959	5.50261	4.96776	5.85308	5.74202	1.89766	4.97976	4.19237	3.39846	2.51084	1.12557	133	0.0257198	5.42522	6.36992	4.15142	1.04889	4.311	2.99521	3.95859	5.01451	-1.65226	4.04114	1.90035	7.34123	3.07581	3.68673	3.71676	5.00789	4.72769	3.39971	2.9624	5.30564	8.29364	1.13669	5.76975	3.79109
134	2.27682	3.57585	4.53047	2.15772	2.07859	3.31625	5.02567	4.41366	4.73809	2.59835	5.03331	6.10446	4.40555	5.64625	5.60803	3.21074	5.43947	4.80661	3.15403	2.55388	1.38253	134	0.266221	5.04953	5.67745	3.5155	1.41628	4.10109	3.52112	5.0209	5.55687	-1.48702	3.22675	2.57084	7.14105	4.06296	3.32039	3.97967	4.80338	5.20941	3.83647	2.87091	5.95882	7.51579	1.44255	5.14628	2.02453
135	2.31589	2.71528	3.51635	2.51543	1.63849	3.06196	4.96427	3.79648	4.60328	1.15322	4.04982	4.95479	5.07107	6.05463	5.3624	3.88718	3.82473	4.07865	3.30112	1.97119	1.99621	135	-0.068339	4.9102	7.40457	4.62321	1.11019	3.86159	2.50594	4.46486	5.92903	-1.47837	3.27708	3.04118	8.28042	4.4358	3.16164	3.69694	4.74141	5.28992	4.10317	3.79571	6.35922	7.68008	0.671903	4.83457	3.56875
136	2.56127	4.47676	3.23593	2.9896	2.52322	2.75278	4.9532	3.37145	5.00164	1.9688	3.85988	6.27336	4.42835	6.12321	5.31926	2.3365	2.79976	3.7546	3.81399	3.30951	1.17566	136	-0.064174	4.87267	7.41343	4.46717	1.77449	3.66628	4.08522	4.11389	6.08013	-1.6425	2.9599	2.53301	7.31612	3.51894	2.45951	2.65806	4.03636	4.48843	3.28467	3.34417	5.23362	7.13198	1.46258	5.44371	3.34999
137	2.16433	3.64386	4.22945	2.75147	2.59682	3.13988	4.75204	3.92171	4.64913	2.93917	4.17112	6.04897	4.68459	6.29035	5.66364	1.50065	4.64442	3.20611	3.48895	3.32945	0.357022	137	0.0902861	5.45623	6.90987	3.17223	1.90287	4.123	3.1688	3.45471	5.68306	-1.98678	3.62877	2.65543	7.19221	3.0216	3.28885	3.21162	5.4305	3.78009	1.82761	3.86784	5.50679	6.47407	0.767443	5.47506	2.39496
138	3.20403	3.27267	2.87722	2.31274	2.50339	2.12131	4.38679	3.25509	4.47551	1.47988	4.08772	6.1029	4.94566	4.00682	5.94235	2.17844	3.42245	3.55203	2.85706	4.01784	2.71339	138	-0.148745	5.98368	6.8155	4.72208	2.50983	3.50637	3.20807	5.13562	5.90537	-1.19916	3.17472	2.16976	7.84476	4.35938	2.46147	2.67851	4.60608	4.22976	4.1603	3.92402	5.90274	7.58955	1.2248	3.7788	3.22889
139	2.17778	4.16607	4.56906	3.36222	3.09732	2.85853	4.30575	3.81441	4.5011	2.22326	4.1912	6.25571	5.01451	5.53859	5.01798	2.09498	4.64192	3.8953	2.71385	3.65356	2.19722	139	0.198097	4.77336	5.89359	4.46792	1.00019	3.87992	2.779	3.76116	6.46679	-1.34796	3.41325	3.55121	8.05744	2.72126	2.7386	2.54981	4.79644	4.2762	1.65125	3.42697	4.40202	7.57481	1.05384	5.06312	4.02252
140	2.07424	2.95287	4.33139	2.56314	2.68484	2.59957	4.18134	2.7631	4.10545	1.8382	2.79331	6.01449	3.94731	5.13082	4.51805	3.5479	3.71204	2.83095	3.78445	3.33625	1.56997	140	0.219697	5.28521	5.14819	3.98833	1.35835	5.13227	2.61524	4.47405	5.94344	-1.27406	3.64046	3.94874	7.56084	2.99871	3.91055	3.55658	4.43946	3.64729	3.85521	2.78603	4.36535	7.13786	1.14395	5.31669	2.21515
141	2.6487	3.23145	4.84746	2.95046	2.6615	2.63921	5.03575	4.19946	4.84922	2.82288	3.87562	5.27639	5.18219	6.38911	3.83171	4.2944	3.96978	3.5866	2.91208	1.89945	1.19032	141	0.706945	4.3577	6.55453	4.09896	0.889949	3.82226	3.04398	4.51607	5.73592	-0.0762949	2.86283	3.511	8.74769	3.39141	1.94104	3.55994	4.6333	3.9119	3.13141	3.62663	6.35405	6.75469	1.17502	4.98875	3.39316
142	3.69123	2.47574	4.20223	2.80071	2.62312	3.06199	3.82324	3.18052	4.48543	2.50028	3.74783	5.42798	4.36523	5.34697	4.55139	4.62242	4.04507	4.30804	3.50624	2.69403	1.90425	142	0.162446	6.15797	6.64306	3.4194	1.01438	3.9255	3.34112	4.11174	5.83769	-0.916508	4.3298	3.02734	8.0782	3.44733	3.1511	3.68755	4.2013	3.43925	1.33986	2.7902	6.26708	7.63809	0.701131	4.98871	3.36686
143	3.34409	3.66941	2.85318	2.18421	2.37074	2.22836	3.95698	4.25193	4.10366	3.1656	3.7509	4.87564	4.83214	5.04768	4.96894	2.63608	3.22857	4.88766	3.77612	2.3636	1.86964	143	0.0423604	4.29901	6.35653	4.00051	1.13707	4.55188	2.99622	4.00998	5.35524	-0.653808	4.09417	0.591854	7.47946	3.46256	3.4792	4.09583	3.24605	5.12413	4.13356	2.51464	5.5238	7.364	1.17298	5.12331	3.09059
144	3.15323	3.64913	3.53487	3.28696	2.53692	2.56831	4.76702	3.88383	4.63575	2.11095	3.25143	6.22179	5.17097	6.80838	4.76152	3.70612	4.64033	4.26794	4.05086	2.53774	1.75391	144	-0.20795	4.12969	6.28493	3.89032	1.47658	4.01612	3.30779	4.25272	5.95484	-1.40755	2.86963	2.6174	7.50943	2.48269	2.65193	3.57639	3.78734	4.32088	2.45697	2.28409	5.2298	6.95261	0.844762	5.17264	2.42397
145	3.32889	3.6309	5.55388	3.3926	2.56802	3.23416	4.74422	3.47108	4.74561	2.39429	4.38356	6.45001	5.84915	5.14159	4.62664	3.7629	4.57938	3.06869	3.59978	2.92874	1.28585	145	0.339605	5.39366	3.56755	4.33904	0.96371	4.2161	3.27247	4.72729	5.04489	-0.935287	3.3834	2.4937	7.2564	3.96428	2.19778	2.71332	5.5879	4.67302	4.18968	3.22904	5.69735	7.96012	1.17631	5.4715	3.05677
146	2.87072	1.92639	4.35128	1.99466	2.69898	2.53357	4.51096	3.88479	3.69867	2.37583	3.40419	5.38452	5.12657	5.96972	4.74747	3.61601	4.7551	4.05817	3.38454	3.3173	2.39761	146	-0.107324	4.99958	5.78331	3.33551	1.17566	4.95201	3.30856	3.99195	6.31618	-1.81269	3.89753	2.66637	7.88124	2.89656	2.36267	2.94652	3.68152	5.5414	2.93663	2.74212	6.69826	7.47562	1.67007	4.07087	3.52655
147	3.88557	3.55669	4.61794	2.06726	2.53607	2.36489	4.30069	3.81479	4.49937	2.12393	4.16905	5.77746	4.34892	5.04986	5.47942	3.30846	5.06206	3.74029	3.09075	2.88441	1.20961	147	-0.0400163	5.23004	6.72458	3.69788	0.947721	4.12668	3.61686	4.7753	5.64571	-1.15674	4.12403	3.25085	6.323	3.13898	2.77032	2.67417	4.33411	4.9448	2.44001	1.31945	4.18782	7.70048	0.630313	4.09291	3.05818
148	2.79047	4.37475	2.76447	2.25945	1.96431	2.71861	4.64346	2.72892	3.48894	1.62977	4.06576	5.3919	5.42357	4.89483	4.54855	3.50915	4.62276	3.23019	4.47537	3.54284	0.538536	148	0.482137	4.73666	5.97866	4.41843	2.47595	3.88447	3.58849	4.21451	6.81559	-0.177144	3.05386	3.96005	6.97271	3.78187	2.2938	2.90121	3.76717	3.78245	2.25215	3.32407	5.10731	7.50047	0.745536	5.55588	2.546
149	3.54045	1.78341	3.07733	2.98876	2.08689	2.77429	4.20922	4.16909	4.55042	1.50946	4.42684	5.6809	4.30132	4.20569	5.90313	2.57449	5.34773	4.20662	4.38745	3.28252	2.06764	149	0.89155	5.3639	5.84671	3.07375	1.52117	3.87302	3.52729	3.57961	6.3644	-1.28029	3.70715	3.17115	7.4674	3.47299	2.23029	3.47383	4.38941	5.82161	4.66281	3.74899	5.01309	7.79153	0.636255	4.385	3.61669
150	2.6042	1.85565	3.19517	2.45182	2.87755	2.03946	4.83596	3.41204	4.07299	1.90852	2.76047	5.84292	5.2511	4.33674	4.76903	2.94887	4.79156	3.39152	3.44432	2.11323	1.67683	150	0.364728	5.69287	6.69774	4.36035	1.80401	4.14327	3.15127	3.25549	5.20456	-0.884371	2.79534	0.834963	7.0253	3.14816	2.70238	3.73587	5.55112	4.75554	3.7416	1.74985	6.33848	5.04264	0.252407	5.66059	3.20324
151	2.89328	2.80257	4.68436	2.45853	2.56328	2.35475	4.73127	4.29132	4.1114	2.92086	4.17698	5.75109	5.12753	5.63967	5.61263	3.04456	4.42526	4.44188	2.63383	3.37594	1.95366	151	0.244999	5.10092	6.42607	2.98082	1.4239	3.91404	3.21184	4.48293	6.11086	-1.44359	2.44461	3.04357	8.38524	3.22028	2.80657	3.74426	3.92369	3.87452	2.75101	3.80657	5.37614	7.60113	0.906189	4.99972	3.33413
152	3.24202	3.42189	3.40025	2.10288	2.23493	2.99219	4.90257	4.62646	3.97009	2.7453	4.58509	6.01631	4.13916	4.86939	4.88308	3.62826	4.31059	4.81657	3.85001	3.67395	1.38628	152	-0.276142	4.87851	5.06486	3.07649	1.24666	4.54411	3.08161	4.20743	4.64129	-1.62776	3.70619	3.56522	6.96567	2.52342	2.75539	3.46167	4.76691	2.36831	3.93047	2.52161	5.34292	6.82705	1.25831	5.4045	2.09668
153	1.99227	2.26914	4.94345	2.2532	2.66689	2.70622	4.31507	4.00022	3.12211	1.92209	1.32037	5.39053	4.20388	3.93268	3.94306	3.54151	4.37698	3.49491	2.75067	1.48569	0.974616	153	0.305206	4.61227	5.01981	3.32483	1.31902	3.6463	2.49139	4.58506	6.54639	-1.78041	4.14454	2.9743	6.3898	4.29303	3.55778	2.64791	4.04715	3.26311	3.77657	3.7501	5.54856	6.96725	0.66555	5.38467	3.53654
154	2.73445	2.00269	2.99618	2.50903	2.06848	2.94344	5.23251	4.0018	3.78835	1.94654	3.04089	5.62582	4.96126	4.76913	5.13619	2.85037	3.85852	3.93186	3.76047	2.17556	1.66194	154	-0.451551	4.41497	6.40084	3.52196	1.21335	4.41269	3.73618	3.72811	5.61259	-0.858923	2.9302	2.80381	7.82528	4.6479	2.41746	3.60702	4.62615	2.85064	3.44999	3.69041	4.72146	5.34424	1.74167	4.95297	2.12652
155	1.70093	3.03754	3.74368	2.85385	1.95951	1.77588	3.49675	3.24087	3.91354	2.00414	3.7003	5.19835	3.52076	5.11201	4.70292	2.56446	4.01998	2.58971	2.67001	1.88022	-0.673157	155	-0.329681	3.86922	5.36739	3.56274	2.04735	3.68656	2.30695	3.93953	5.9261	-0.800543	4.06723	3.75233	7.53293	3.18587	2.79563	3.02623	3.07009	3.9187	3.32738	3.67647	5.59931	6.28225	0.91244	5.84023	3.34563
156	1.65863	1.89903	3.90884	2.09865	2.31957	2.88265	3.65754	3.59644	3.5681	1.94742	3.44304	3.76676	4.16417	4.38897	4.11953	2.37617	4.55028	2.42951	3.39678	3.18901	1.35702	156	0.602022	4.17704	6.75818	3.82847	1.61327	3.39186	3.23084	3.90205	5.87636	-1.44473	3.09685	3.58197	7.41383	3.6842	3.33663	3.23041	4.72407	3.07709	4.88355	2.73024	5.35902	6.35809	1.79847	4.11403	2.53469
157	2.45851	2.15009	2.57204	2.21422	2.44638	2.94899	4.39732	3.71971	3.84477	2.24815	3.36703	5.49503	3.79521	4.70363	4.84149	3.24893	2.89953	4.00429	2.3653	0.173836	1.7122	157	-0.260699	4.94737	5.69323	4.60437	1.3562	5.34223	2.96918	3.4084	6.30052	-1.6097	2.99947	3.89093	7.88116	3.10995	2.07167	3.81926	4.28854	4.15464	2.68542	3.16207	5.68672	7.60609	1.6476	4.23493	3.92325
158	2.17159	3.23636	3.95782	2.39951	1.54609	2.10496	4.20155	3.33423	3.61022	1.78319	3.04807	5.43541	4.2811	5.26949	3.66635	2.03058	3.22271	4.48371	2.07112	1.95719	0.333372	158	0.0186037	4.0604	5.89823	4.38976	1.6712	4.12213	3.87613	3.75209	5.45281	-1.36275	3.71402	4.25302	7.00757	3.10456	1.56881	3.16879	4.52094	3.36027	4.3411	2.73902	5.00435	7.64192	1.44177	4.5332	3.62316
159	2.21078	3.57871	3.40933	2.39297	2.08168	2.36704	3.75538	3.49838	4.23376	1.98969	3.40871	5.00622	3.48887	4.43407	3.32068	1.5855	4.23662	3.70886	3.25069	2.56445	0.681665	159	0.0892564	4.606	4.96828	4.00172	1.73013	3.78892	3.68402	5.73206	6.48734	-2.08557	3.10043	2.85635	7.12219	3.6489	2.4929	3.72008	4.18908	4.21317	2.44772	3.37357	4.77902	6.3696	1.69293	4.41731	2.43684
160	1.95881	2.7283	4.50124	1.12665	2.35863	1.90169	4.00665	2.98795	3.83217	1.72555	2.00878	4.46938	3.82342	4.25596	4.78405	-8.7284	3.59161	3.73818	4.03382	3.10001	-0.156936	160	0.623304	4.38819	6.46284	2.47417	1.34722	3.45087	2.61146	4.123	5.81169	-0.978974	3.29257	3.29911	5.40496	2.8614	2.7839	3.28424	3.52301	3.11298	2.9622	2.48072	5.08694	5.40628	1.22021	4.50549	2.49879
161	1.57431	1.7048	2.81831	1.49993	1.75287	1.94385	4.73534	2.57034	2.83848	1.60893	3.60682	4.40519	4.74955	5.59414	4.97121	1.4982	3.96069	2.83659	2.24273	3.00643	0.900523	161	0.110045	4.14168	5.27605	3.12552	1.2177	3.60465	2.44642	4.91085	5.89078	-1.53797	2.75532	2.02141	6.77917	3.35648	3.0606	3.30113	3.82154	4.26083	2.66163	3.44251	5.4189	4.33206	1.32591	4.43287	2.94917
162	2.27933	1.57509	2.57574	1.59481	1.54377	1.98777	3.73631	3.22783	3.38887	2.02159	2.69526	4.41815	3.33483	4.47298	4.30133	2.35353	4.00018	3.87753	2.1684	2.36422	0.288915	162	-0.920018	4.35364	5.87637	3.2078	1.29568	3.31416	2.21544	5.17437	4.79519	-1.11645	3.69793	4.39808	5.4861	2.7976	3.45922	3.27708	4.04674	4.37067	3.42377	2.65886	4.88074	2.86009	1.26167	4.82449	3.66873
163	2.5729	3.85781	2.23965	2.15248	1.67846	1.27829	3.25372	3.48932	3.18166	2.34339	2.9443	4.28261	3.64565	4.20579	4.79245	1.32739	4.09155	2.85444	1.62217	2.60762	1.14249	163	0.373893	3.83141	5.16134	1.96523	1.75609	4.49428	2.89526	4.57531	5.5373	-0.525891	2.18922	3.64285	7.43963	3.15713	2.5338	2.93386	4.11438	3.53942	3.37949	3.46729	5.19107	5.73866	1.57871	4.49824	2.16633
164	1.76957	2.27275	3.4216	1.92985	1.66802	2.45581	4.19507	3.27535	4.07391	2.13223	3.78015	4.01811	3.89461	4.25505	4.29484	1.54582	3.42399	2.0366	2.3417	2.72873	2.04196	164	-0.0511372	4.00962	5.56857	2.87291	1.64394	4.07057	3.20566	4.65223	5.67158	-1.20401	2.95295	3.30348	5.93376	2.21663	2.23536	3.8957	3.33329	3.36081	2.6289	3.36443	4.56353	6.44844	1.10073	4.53808	2.43254
165	2.642	2.63295	3.8392	2.59263	1.53575	3.1218	3.80175	2.71574	3.69393	1.32767	3.86482	4.43103	4.45315	3.83972	3.51577	2.76088	2.82389	3.2775	2.54527	2.11218	2.39487	165	0.341686	3.94672	5.3833	3.0563	2.40654	4.01606	2.89206	4.76161	5.85744	-0.13721	2.7446	3.38515	6.96438	2.32009	2.27215	3.42411	3.51272	2.6818	3.67819	2.96131	5.7694	4.04605	0.760137	3.55505	2.71854
166	1.93066	1.18316	3.79621	1.91345	2.45785	1.99626	3.99715	2.35153	2.10554	0.148386	3.79927	3.37504	4.08159	3.97081	4.51217	2.17091	4.61621	3.29159	1.69355	2.38225	-0.0601736	166	0.115659	4.78861	4.13969	2.6679	1.94114	3.31855	2.9519	5.08915	4.92841	-1.48629	2.72781	3.60171	6.97041	2.96969	2.33346	3.13017	3.5385	4.91021	4.24958	2.0417	5.4944	6.24295	1.76076	5.79374	2.59727
167	1.0705	2.75814	3.09131	1.12614	1.47855	2.68126	3.346	3.45921	3.27052	1.18898	3.48205	3.79971	4.02604	3.61064	3.89458	0.719809	3.01038	3.75149	2.72479	2.43264	0.635135	167	0.326289	3.69187	6.25479	3.20592	1.85238	3.21461	2.7422	4.67865	5.0141	-1.32952	2.79428	3.39374	5.49346	2.04244	2.12076	3.10367	3.78717	3.60013	3.99791	4.0099	4.61746	4.70744	1.1564	5.31664	3.04332
168	1.97157	3.70538	3.49075	2.05839	1.73299	2.06028	3.55933	3.12077	3.04993	2.37689	2.4591	4.16908	3.59959	4.76038	3.54323	1.97226	3.3665	2.9623	2.43129	1.7396	1.3855	168	0.34014	4.43179	4.25804	3.46036	1.49156	4.06009	3.14853	5.15768	6.0132	-2.02426	2.60545	3.60285	5.97503	3.46849	2.95505	3.18624	4.70847	3.97318	2.37801	3.18501	5.63352	4.27162	1.86853	5.17332	2.54845
169	1.5009	1.43726	3.71638	0.974407	2.56987	2.57173	4.10033	2.86493	2.80978	1.06859	3.47581	3.08463	3.44227	4.32259	4.62521	1.35374	3.22012	3.28713	2.80075	1.55247	0.188962	169	-0.383505	4.03488	4.73969	3.50246	2.3807	3.37115	3.21885	5.28294	5.46452	-2.36577	2.75474	3.18107	6.60362	3.05489	2.40096	3.46928	4.93037	3.68743	3.08524	2.31223	5.46765	4.9679	1.48633	4.38681	1.65382
170	1.85743	2.23524	3.00517	1.03106	2.08444	1.31901	2.81451	2.97057	3.02644	1.71378	1.36449	4.48181	3.5016	2.70105	4.0455	2.00624	1.22119	2.43141	2.25227	2.11594	1.30583	170	0.583813	4.20669	5.43506	2.98225	1.71968	3.81439	2.60636	4.45348	6.22743	-1.65715	2.91408	3.03484	5.96489	3.20435	3.00203	3.5376	3.93479	3.80956	3.08947	2.4016	4.74908	5.98645	1.91945	4.74585	1.94826
171	0.99339	1.89471	3.60651	1.92953	1.93174	2.07631	4.13861	2.83339	2.98565	1.73002	2.19852	3.13225	2.46022	2.94728	4.01557	1.42407	3.915	3.10169	3.04698	1.26354	0.483941	171	0.806474	4.28993	6.00766	3.22069	1.42376	3.91984	2.90519	4.816	5.1419	-1.83222	3.19667	3.00278	6.14175	2.33827	2.55618	3.27966	3.37365	4.16721	2.67023	3.20921	4.83241	4.52465	1.62996	4.25347	3.72384
172	0.978751	2.04254	2.83938	1.70804	2.33132	1.59784	3.18531	2.16907	3.24117	1.80462	2.58458	3.31169	3.68441	3.65093	3.41816	1.8743	2.7935	2.97587	2.18548	2.2601	1.49549	172	0.0186037	3.6867	6.19756	2.33029	2.02758	3.61172	3.2865	6.09067	5.80627	-1.10865	3.48144	3.21662	6.89809	2.05763	2.87275	3.5881	4.28067	2.94176	2.77417	2.88044	5.53571	6.36916	1.53651	4.83578	2.68771
173	1.2397	2.70916	2.70274	1.6759	1.63386	1.36574	3.02293	3.23481	2.54691	2.33179	2.08777	3.84935	1.29813	4.19056	3.47323	0.913036	2.43698	3.35933	1.93343	0.868644	-0.0671583	173	0.287573	4.38769	5.04296	3.76498	1.74893	4.01884	2.71104	4.54229	6.41688	-0.909129	3.89906	1.82161	7.08	3.00249	1.99471	3.8336	3.43926	4.66209	3.21638	3.36946	4.8328	5.38209	1.27039	4.80877	2.12793
174	1.34555	2.31593	3.79659	1.72007	1.41139	1.3393	3.2334	2.97929	2.16068	1.36885	2.49296	3.66845	2.95661	4.10695	3.27298	1.99874	3.22667	2.63575	1.73159	1.89924	0.128991	174	0.244135	4.00781	5.25063	2.81329	2.22968	3.38997	2.65731	3.57342	5.10621	-1.9815	3.66029	3.55488	7.40931	2.21814	2.58281	2.81628	3.53173	3.06271	3.3663	3.67104	3.93277	7.01073	1.48658	4.31804	0.959229
175	1.31862	2.60268	2.55895	1.67225	1.5711	1.38028	3.81804	2.2546	3.24225	0.875356	2.73571	3.61169	3.2846	3.98519	3.56019	2.65508	3.21549	3.02694	2.23161	1.613	1.78748	175	0.291751	4.144	5.63368	2.58277	0.56997	2.97171	2.53644	5.11426	4.35069	-1.00547	3.31469	2.9989	7.8768	1.66667	2.42088	3.11592	3.9587	3.59476	2.23099	2.51823	4.03399	5.80922	2.0562	4.11987	2.90184
176	1.27859	2.54577	2.95459	1.69272	1.87181	1.22169	2.93898	2.7011	2.05155	1.81418	1.16456	3.57023	3.64628	3.17756	2.80267	2.37962	3.5796	3.24543	1.8456	1.63143	0.0409044	176	-0.0429131	3.12828	5.52599	3.47994	1.39544	4.27414	2.33859	5.12899	5.6836	-1.05669	2.94753	1.96763	6.68074	1.31039	2.46484	3.35953	3.16953	3.87938	2.71751	1.68877	4.75443	5.5724	2.37854	3.54854	2.17479
177	1.00125	1.75222	2.90011	1.5571	1.78392	1.46459	2.89232	2.49119	2.12225	0.44228	2.36557	4.26518	3.22612	3.29506	3.92284	1.73312	2.96376	3.17455	2.60469	1.21701	0.711937	177	-0.502188	4.50679	4.78736	2.26475	1.49914	3.49843	3.0006	4.85031	4.87234	-0.706215	3.12534	2.96376	7.38091	1.42216	2.55363	3.39117	3.91653	3.76702	1.944	2.44639	4.77401	5.61761	2.05408	4.36883	3.183
178	1.08919	2.4513	3.3034	0.996075	1.57455	1.32951	2.96661	2.82189	1.79645	0.971006	2.40573	3.65238	4.28604	3.07007	2.78293	2.04359	3.37674	3.24901	2.66144	2.84817	0.355564	178	0.738562	2.98815	4.59679	1.98503	2.19173	3.84796	2.57861	4.83843	5.09589	-2.37777	3.22262	2.02676	6.05063	0.887142	2.34399	3.55644	3.95861	4.88835	2.20905	3.0881	4.53784	5.01408	0.80863	4.99293	1.81593
179	1.53745	2.24276	2.69147	1.61185	1.56061	1.83442	2.73394	2.31534	3.55073	2.10823	1.99086	3.23877	2.2435	3.78559	3.66289	1.26585	2.26001	1.94689	2.55675	2.27539	0.414818	179	-0.0256748	2.87411	5.02562	2.94453	1.08216	3.73351	2.46577	5.06373	5.745	-2.08584	3.48195	3.24129	7.50483	2.76665	2.09954	3.71659	3.56296	3.93432	3.4291	2.44742	4.84912	5.27931	1.61042	3.0895	1.59
180	1.77281	1.44487	1.03626	2.34454	1.92027	1.71855	2.48096	3.97756	2.96915	0.887339	2.39494	2.65624	2.69841	3.59323	3.40918	1.57191	2.88547	2.09837	1.49716	1.70949	-0.236937	180	-0.284548	3.69681	4.83367	1.7882	1.27675	3.62831	2.77006	4.85715	5.85871	-1.83975	3.4127	2.21238	7.2883	1.97109	2.63752	2.23874	3.75263	3.88174	2.64547	2.502	5.05696	5.32883	1.94076	4.26462	3.32047
181	0.958573	1.80375	2.38138	0.876258	1.84305	1.21663	2.94943	2.99384	3.11699	1.67144	2.39465	3.02117	2.32542	2.98844	3.26088	2.31212	2.49686	1.34359	2.23875	1.61137	1.34675	181	0.206499	3.6786	5.12779	3.26217	2.63467	4.36143	2.54135	5.92932	5.34801	-1.35861	2.30218	2.74151	6.73371	2.19017	1.82062	3.43486	3.08614	2.76215	3.54886	3.00315	4.31599	4.30383	1.17002	5.10573	2.52341
182	1.01905	1.08149	2.17335	1.6445	1.45014	1.14515	3.24401	2.92109	2.58436	1.31364	1.33435	2.69626	1.49729	2.86426	2.95707	1.70132	2.80493	2.36426	2.64075	1.18374	-0.52917	182	-0.826199	4.13263	4.88596	1.7972	1.60969	3.73039	3.09918	4.77494	4.80806	-1.55155	3.37099	2.2642	6.43016	1.72198	2.76803	3.27445	2.94258	3.68416	1.98046	2.42445	4.93296	3.7012	1.88839	4.81532	2.88464
183	2.05107	1.09089	2.71094	0.691655	1.29103	0.557878	2.93838	2.17719	2.7479	1.87114	-0.520524	2.87628	3.78115	3.56585	2.84467	1.20895	2.94165	2.55548	2.36423	0.848704	0.617208	183	-0.0695877	3.92605	5.55013	3.717	1.16854	3.22651	2.59477	4.0504	5.01123	-1.98674	3.6086	3.30841	6.91028	2.62141	1.92952	3.29951	2.82291	1.7864	3.17721	1.79119	4.89365	5.61848	1.55768	4.28148	2.05174
184	1.28479	1.76168	2.92864	0.991354	1.53468	1.60628	2.98743	3.48173	2.54803	2.39387	2.5837	2.99597	2.45271	2.87955	2.78497	2.11659	3.84334	1.82934	2.05804	1.6989	0.102953	184	-0.821076	3.6617	5.05909	2.56206	1.38807	3.30201	2.60737	4.73817	5.06488	-1.78314	2.18319	2.36225	5.39242	2.25837	2.76018	2.54266	4.09662	3.24874	1.97031	2.91235	4.72349	4.42372	1.30841	3.57751	2.44268
185	1.05776	2.13221	2.70789	1.03738	1.95149	1.92094	3.64247	2.84721	2.31336	2.30691	2.64441	1.98354	3.02012	2.41212	1.95573	1.63882	2.60965	2.49706	1.93315	1.89632	0.584792	185	-0.1913	4.10484	2.93389	2.36109	0.902587	3.34882	2.56867	4.62835	4.72045	-0.965252	3.25336	1.29761	4.33494	2.90933	2.17297	2.64714	4.03659	3.3301	3.03834	2.37689	5.11716	6.0393	0.798131	3.59242	1.58587
186	2.07836	1.3823	3.86405	1.6002	1.32816	1.36695	2.87473	3.00519	2.19725	1.26305	2.61576	2.90269	3.4824	2.30629	3.40851	1.5918	2.74846	1.92352	1.51429	1.60076	1.56883	186	0.490632	3.03779	5.00985	2.97168	2.15577	3.17317	3.1488	4.88075	5.06283	-1.52601	3.21207	2.54389	6.59463	2.50959	1.87347	3.32028	3.42498	4.00682	2.28069	2.49589	4.32631	7.1815	1.38837	4.89883	2.01464
187	0.494328	1.80596	1.71224	0.810959	1.4409	1.36112	2.76885	2.69663	2.34661	1.38406	0.885345	2.78112	3.07785	2.71263	2.96235	1.98483	2.62856	2.3945	1.25296	2.45543	0.823115	187	0.338908	4.17205	3.74721	3.02186	1.32565	3.10572	2.31748	4.66075	5.66282	-2.32857	2.41666	2.66727	7.0129	1.72064	1.58754	2.91577	3.67955	2.48067	2.42914	3.30672	3.94422	5.60658	1.91002	3.95469	2.22495
188	1.42432	2.82991	0.409628	0.927823	1.47749	1.25505	2.47533	2.49763	2.7856	1.13228	2.08699	3.03607	3.36787	3.02272	2.7528	1.29274	3.12698	2.00882	0.875882	1.70376	1.4154	188	-0.246773	4.09721	3.30548	3.71251	1.26398	4.10578	3.35541	3.67372	4.02091	-1.29195	3.06166	2.75467	5.9016	1.9815	2.50707	2.35423	2.98236	3.1447	2.06311	3.22817	4.01835	5.57536	2.16279	5.13722	1.99514
189	2.13109	1.38228	1.29167	1.43345	1.55818	0.869448	2.67276	2.40655	3.01857	1.46086	1.7645	2.66273	2.50428	2.23794	2.6634	2.6351	3.1904	2.75964	1.86329	0.547908	0.231897	189	0.376883	3.63465	4.93071	2.61105	1.54446	2.82026	2.12383	4.85173	5.55155	-1.94261	2.86634	2.79283	6.74192	2.2448	2.33972	3.44815	2.82345	4.72654	2.26287	3.03378	5.3348	4.94247	2.64902	4.26995	2.07749
190	0.965829	1.94746	2.33369	1.30973	1.08308	1.70706	2.76788	2.32121	3.08606	1.15196	1.09121	3.49282	2.38221	2.40305	2.92743	2.54621	2.48361	1.44296	2.60972	1.10553	-1.08262	190	-0.72126	3.62016	4.2447	2.39492	1.9072	3.46292	3.22255	3.93383	5.2351	-2.16837	2.2169	1.41532	6.73784	1.5495	2.88083	2.14471	3.39521	3.7504	2.70716	2.38159	5.44009	3.22362	1.50923	4.43088	2.1081
191	0.27753	0.621656	1.95378	0.704353	2.04474	1.95283	2.29404	1.89621	1.65118	1.262	1.98121	3.75707	2.02174	2.54945	3.17551	1.31336	2.97229	2.69702	2.53038	1.03139	1.5312	191	0.333043	3.86972	4.2157	3.3437	1.00706	3.55086	2.61622	5.32153	5.23497	-1.73083	2.2948	2.83876	4.78909	2.73077	1.29383	2.83716	3.92623	4.11674	3.24998	2.47661	4.84181	6.42209	1.39451	4.48793	2.72233
192	0.699934	1.41638	1.26794	0.617448	1.29135	1.40808	2.46404	2.51792	2.22579	2.06423	2.68142	2.82473	2.7811	2.19383	1.74933	2.28748	2.68094	2.36819	0.943947	0.845836	-0.43208	192	-0.293425	3.78379	4.84669	1.82166	1.53514	3.44068	2.67829	4.02831	5.34155	-1.46861	3.01888	3.64406	6.36503	1.55413	1.3068	2.212	5.17967	4.65467	3.24789	3.01995	4.15751	5.37533	1.38773	3.4985	2.61465
193	2.46672	1.544	2.7583	1.00898	1.82611	0.569371	1.30573	1.85483	1.06742	1.36351	2.2144	2.33542	2.50403	2.16713	2.95767	1.79226	2.10636	0.984265	1.91845	1.09828	0.228613	193	0.021651	3.96541	3.83019	1.96168	1.07946	3.01426	3.11852	4.20918	4.39174	-2.61026	2.88055	2.31212	6.72058	3.29381	1.45078	2.67778	4.22585	3.29135	1.7237	3.32055	4.41482	6.17873	1.69598	5.09003	1.6138
194	1.29876	2.53779	2.79996	0.940856	1.71113	0.983827	1.7985	2.23373	2.62814	2.44972	2.89131	2.99886	2.74688	1.01926	1.96646	1.59445	3.09559	1.79129	1.08738	1.25087	-1.7119	194	0.344991	3.32187	4.87511	2.07154	1.95422	3.31322	3.08974	4.2774	4.71449	-1.77496	2.77034	1.79147	6.76452	2.16702	3.15234	2.77081	3.86366	3.18425	2.88931	2.5265	4.74894	5.89402	1.67252	4.55905	2.20905
195	2.36597	2.29932	2.59804	0.83398	1.99774	1.36671	2.56271	3.13478	2.37106	1.6187	1.87238	1.2339	3.57274	2.53525	2.72479	0.996475	2.28154	2.39834	2.08459	1.89579	-0.889638	195	0.331968	3.42629	4.98553	2.68671	1.70907	2.9324	2.85389	4.78746	5.30065	-2.68978	3.14138	2.77074	6.89115	2.7176	2.51229	3.01192	2.71851	2.3475	2.65301	2.29239	4.28483	5.13349	0.765169	3.57658	2.3129
196	0.804893	1.28294	2.26453	0.481574	1.30653	1.28555	2.45453	2.55825	1.48625	1.10507	2.51561	2.71568	2.66624	2.88259	2.19241	1.15154	2.58455	2.20837	1.49285	1.23991	0.536264	196	-0.348602	3.59858	4.38196	2.03082	1.2321	3.56556	2.84481	3.30589	4.35735	-1.84135	2.89433	1.07677	7.57223	1.58047	2.71187	3.1918	3.91909	2.49396	2.0147	2.33079	4.42845	5.71262	1.19946	3.59206	1.49846
197	0.84522	0.632953	2.03544	1.22759	1.72069	1.13569	1.58817	1.44694	1.57022	1.66023	-0.0381455	2.32766	2.0044	2.10345	2.68553	1.11984	2.10016	1.92709	1.61235	0.188649	0.258444	197	-0.404186	4.15741	4.0296	2.37674	1.96842	2.3881	2.53622	4.71747	4.28173	-2.46041	2.5763	2.53682	5.66629	1.59535	1.49673	2.3581	4.24007	2.53409	2.43572	1.22105	4.52504	4.49144	2.13809	3.87012	1.27954
198	0.954664	1.513	1.40701	1.1535	1.79722	1.13409	1.84611	3.11144	2.20754	1.45287	0.765384	3.09452	2.392	2.59611	3.31041	1.0444	1.20548	1.27291	1.1278	1.38603	0.525428	198	0.419385	3.30242	3.55039	2.18328	1.28484	2.83392	2.38955	4.16455	5.29774	-1.79265	2.35067	1.06688	5.1007	1.63146	1.6519	2.21339	4.90169	2.60349	3.37164	0.541822	4.48873	5.7085	1.2892	5.08203	2.37264
199	1.51394	1.41293	2.10508	1.34982	1.51667	1.24393	1.44047	1.74441	1.3459	1.66382	2.41824	3.01819	3.31268	1.8257	2.62834	1.60514	1.99605	1.50029	1.88186	1.5977	0.194742	199	0.528704	3.37176	3.38867	2.50859	0.527168	2.90406	2.44697	3.63101	4.46622	-2.76347	2.20208	2.53678	6.23499	1.02034	2.05119	2.09922	3.96505	2.67229	2.40607	3.21205	5.38227	5.71072	1.4763	4.34059	2.28545
200	1.17281	2.21526	2.7649	0.837068	1.16847	1.13476	1.21787	2.03	2.1269	1.72214	2.09115	2.88852	2.25295	2.74193	2.23994	1.5513	3.99306	1.87855	2.38088	0.957319	-0.23047	200	-0.670251	2.97601	3.51656	2.7809	2.06274	3.4409	3.34211	4.37304	4.1046	-2.11251	3.37552	3.71792	6.13689	1.30862	2.67469	3.17619	3.20053	2.49956	2.76751	2.40022	4.04411	5.14718	1.71898	4.26834	3.28565
201	2.46962	0.722672	2.68868	0.468552	1.26512	1.38286	2.04136	2.88409	2.79898	1.20977	1.45498	3.30001	2.81004	2.30937	2.60574	2.09234	2.4472	1.37792	1.7262	1.26525	0.12766	201	-0.669012	3.3344	4.25372	2.7547	0.8816	3.44518	1.62818	4.56489	4.86306	-1.43015	2.38041	2.24565	5.64849	1.68369	1.40362	3.25874	5.31951	3.1358	3.88797	2.56589	4.29	4.47805	1.70781	3.93727	2.19212
202	0.324959	1.37208	1.61438	0.909298	1.46638	1.62931	2.96047	2.00442	1.6718	0.553567	1.74042	1.55603	2.60438	2.22016	1.10903	2.05593	3.09935	1.57275	1.23609	1.4066	0.217517	202	0.0309184	2.65107	3.8387	2.66058	1.19937	2.34932	2.82923	4.64001	3.66434	-2.41335	2.03428	2.24732	6.58065	1.47079	1.66234	2.95528	3.03145	3.73913	2.79624	2.76939	4.70978	4.24817	0.910964	4.30923	1.94146
203	0.632163	0.730468	1.99013	0.718401	2.00841	1.08326	2.46972	2.06614	2.17705	0.16425	1.74675	2.793	2.56208	2.08843	1.21637	0.900307	2.01725	2.42231	1.4687	1.59103	0.601026	203	-0.270891	3.94292	4.11761	2.26551	1.23564	3.30617	2.61629	3.81546	4.12573	-1.91327	1.85295	3.02473	6.9703	0.497981	2.04215	2.44857	3.84777	1.40601	1.95018	2.17632	3.50349	5.60699	1.25492	3.71827	2.74045
204	1.2851	1.9254	2.49046	1.08184	1.57448	1.01109	2.04053	1.60339	1.24296	1.68478	2.31416	2.85896	2.60704	2.56418	2.64297	1.29705	1.7196	2.2285	1.27433	1.08285	-0.3333	204	-0.19418	3.06821	4.93611	2.78646	1.84749	3.02936	1.96951	4.39189	4.04161	-1.92457	1.75972	2.61644	6.01696	2.01633	2.3911	2.31395	4.30113	3.37609	3.38607	2.10251	4.23897	5.9426	0.535513	2.81434	2.68546
205	1.05041	1.11095	1.83974	0.875132	1.35802	1.34066	2.46731	2.57275	1.9973	1.52812	0.741409	2.53677	3.14656	1.96021	1.94605	1.80644	1.74816	1.58329	0.717456	2.18411	0.170697	205	-0.249991	3.3018	3.32651	1.69677	0.278864	3.04687	2.36032	3.70027	4.67947	-2.20047	1.31268	2.88355	4.95211	1.23218	1.92535	2.38484	3.1667	2.72628	3.43533	3.27065	4.77424	4.70091	1.03315	4.1752	3.50977
206	-0.295941	2.41988	2.24123	0.372273	0.877822	1.28916	2.20686	2.39083	2.72221	1.04313	1.73608	1.57872	2.66259	1.41458	3.01841	1.86914	2.68812	1.41709	2.25369	1.24109	0.186254	206	-0.299486	3.5533	3.76661	2.09016	1.49507	2.86399	2.13562	4.60625	4.65686	-1.43366	1.65312	1.89411	5.86763	1.79452	2.52776	3.04991	4.57311	3.98829	1.76919	1.97359	3.81151	4.19154	0.149712	3.83775	2.99106
207	0.562892	1.28222	2.26888	0.761792	0.975457	0.957231	1.52601	2.74647	2.15143	1.69009	1.00531	2.48647	2.46956	1.90556	1.91384	0.49908	2.50533	1.20754	1.15148	1.38045	-1.32538	207	-0.152386	3.38078	2.95455	1.61712	1.69922	3.53024	1.82548	4.37691	5.02275	-1.4038	1.85755	2.98581	5.05088	0.933887	2.28343	2.67773	3.78694	3.57073	2.68733	1.42925	3.88986	3.10189	1.67272	5.17479	1.81847
208	1.0011	1.45394	2.25108	1.09629	0.706604	1.24946	2.50728	2.21877	2.74889	1.90276	1.84853	2.13645	2.20686	2.90974	1.8727	1.65248	1.87555	1.47628	2.33258	0.463199	0.923674	208	-1.01336	2.84973	2.6832	2.26855	0.801045	3.20852	2.88916	3.85407	4.50147	-2.12448	1.02727	1.96368	6.24382	2.45754	2.4308	3.19673	3.50119	2.92753	2.07725	1.90887	4.59352	5.09047	1.60129	4.3003	2.79922
209	0.236243	0.338233	1.44567	1.14842	1.35296	0.835685	1.19133	2.46133	2.52618	1.90351	1.86275	2.04706	0.953815	2.67515	2.73325	1.41339	2.15273	2.37138	1.00092	0.776807	-0.746054	209	0.570963	2.40944	3.7159	2.90792	-0.103893	3.34536	1.61375	4.60247	4.08442	-2.42308	2.58351	1.5313	6.29218	1.77257	1.86719	2.57447	3.68069	2.52927	0.496714	1.94312	3.93808	3.47781	1.75675	3.76856	1.63962
210	0.721202	2.80341	2.63388	1.28145	0.930702	1.20809	2.51649	2.02696	2.59159	2.01663	1.82112	3.12801	2.55054	2.73578	2.36221	0.834699	1.90911	2.14302	1.35162	1.63965	0.18339	210	-0.619945	3.58253	3.46495	2.7838	0.478757	3.1887	3.1259	4.2779	3.7952	-2.00516	1.32134	1.92759	5.47654	0.102869	1.89096	1.81195	4.24322	2.91644	2.10675	1.98631	4.2655	4.21944	1.77025	4.09998	2.27615
211	0.895214	0.942598	0.753631	0.665423	0.96382	0.992865	2.37636	2.13083	1.59972	0.756681	0.973062	1.8733	1.46623	2.54325	2.35027	0.879992	3.25698	1.65585	1.58838	1.82008	-0.680612	211	0.326591	2.88945	3.34536	0.950865	0.805844	2.90302	1.86397	3.77673	4.44502	-2.44335	1.18072	2.08815	6.13403	1.37614	1.67099	2.55221	3.37869	1.37998	2.93169	1.01014	4.49133	5.41885	1.36755	4.4588	1.67792
212	0.704664	1.32192	2.90556	0.647125	0.855157	0.968651	2.43715	2.10239	0.929372	2.03315	2.19451	1.86875	2.45305	2.67981	1.63711	1.63749	2.69267	1.69816	2.00244	0.25992	-1.2679	212	-0.571466	3.62052	3.72289	2.3164	0.959677	3.24179	1.57041	3.37845	3.71344	-1.88044	1.37291	2.72508	6.46709	1.65822	0.834689	1.89925	3.73925	2.93774	1.52234	2.78226	3.99052	4.90111	1.67632	4.72687	2.14746
213	1.07902	1.1858	2.05518	0.476432	0.602526	1.47045	2.10067	2.26889	1.04155	2.09363	2.06379	1.7699	1.85743	3.92103	2.01145	2.38876	2.74545	1.30188	1.87705	0.698139	-0.474208	213	0.38993	2.8262	3.75614	2.38754	0.743911	3.03294	1.64265	3.04934	3.52807	-2.0131	2.46523	0.959619	5.53795	2.32099	1.94947	2.83294	3.57996	2.99195	3.15143	2.40038	5.00189	5.59404	1.95219	4.47489	2.92489
214	1.37011	0.897987	1.79218	1.19485	1.08868	1.22393	2.06869	2.51745	1.86632	0.922718	2.31606	3.29893	1.32792	2.35886	1.7954	0.542321	2.72969	0.939678	1.25045	1.32756	0.969045	214	-0.031902	2.98607	3.30105	3.59748	0.72069	3.71793	1.95248	2.38787	4.60327	-2.59447	2.79905	1.2759	6.1617	3.07388	1.05728	1.91168	4.26683	3.3908	2.54295	1.77743	4.13475	4.36041	1.37036	3.23928	1.95554
215	1.30065	1.53703	2.35472	1.18559	1.26535	1.43007	2.17536	1.29092	2.36835	1.67376	1.49149	1.97069	2.8884	2.29144	2.74126	0.279277	2.02984	1.86855	1.80867	1.39496	0.184802	215	0.147325	3.22756	2.84821	1.6402	0.920663	2.64289	1.84648	2.98753	3.96106	-1.76701	3.54691	1.50739	4.90613	1.48015	1.82515	2.03939	1.79634	2.61653	2.85971	2.45525	4.25769	6.15033	1.7998	3.91129	2.28901
216	1.44384	2.11436	2.412	1.0528	1.29598	1.264	1.4324	1.67695	1.30389	1.56451	1.83785	0.450082	3.23783	1.99488	2.08739	2.08729	1.74116	1.49652	1.56509	1.3672	0.251264	216	-0.0811014	2.90352	3.41957	3.00449	0.315987	3.62628	1.70175	2.88104	3.37237	-2.64223	2.45361	2.10187	6.70201	2.1135	1.17321	2.04691	3.9576	2.73064	2.70206	2.29753	3.22137	5.33881	1.66428	4.4079	1.78072
217	0.928441	0.53808	1.94305	1.10416	1.02275	1.38514	2.21525	2.14192	2.28003	1.5642	1.88465	1.6969	1.8266	2.75797	1.77379	0.65066	2.38271	2.26168	0.888059	0.930484	0.844323	217	0.555792	2.52947	4.03416	2.89133	0.586763	3.10977	2.9969	3.26056	4.02267	-1.59036	3.80358	1.18216	5.03148	1.80613	1.14407	1.95897	2.8524	3.21174	2.69707	2.25453	4.63858	5.30827	2.02909	2.89971	1.86778
218	0.559017	1.2174	2.93825	0.715694	1.19947	0.812631	0.776066	2.405	1.25396	1.89767	2.21513	1.40685	3.05675	1.97619	2.19633	1.22419	1.75473	2.05829	0.49486	1.11832	-0.513747	218	-0.0323106	2.68481	3.31186	1.69446	0.749228	3.27522	2.04466	3.75124	3.37266	-2.45567	1.99191	1.68628	7.24319	1.20148	1.2702	2.59478	3.73282	3.22754	1.18497	3.44082	3.52633	6.13608	1.44061	3.71869	2.75483
219	0.167836	1.58332	1.27014	0.832331	0.538792	1.3999	2.30913	1.65011	1.6861	1.22225	1.38416	2.30445	1.93812	2.3996	1.90743	0.870272	1.83374	2.45598	1.41093	1.87092	-0.546605	219	-0.929452	3.0063	2.90073	2.20835	1.11905	3.39232	1.75166	3.41025	4.34666	-2.84101	2.35035	2.1981	4.44582	1.43926	1.71129	2.13218	4.39391	3.92841	1.7075	1.24278	3.79462	4.21765	1.1757	4.50694	2.63167
220	1.14675	0.0178173	-0.816713	1.21786	1.44993	1.10554	1.95001	1.37824	1.86256	0.243779	2.56957	2.0731	2.31374	1.56529	2.58399	0.750442	2.26116	2.01638	0.513208	1.66766	-0.431062	220	0.234476	3.0609	2.15249	1.7451	0.967145	2.84442	2.84875	2.46239	3.42822	-3.3053	1.99747	1.80263	5.98322	2.00807	1.42311	2.71514	2.58523	2.15256	1.41428	3.11931	2.65668	3.9299	1.06866	3.6243	2.54164
221	0.368373	0.96528	0.451541	0.421017	0.886816	0.939312	0.899185	1.51033	1.16334	0.598857	2.59521	0.437175	3.18108	2.42259	1.80806	1.93065	1.77345	2.28212	0.719754	1.11638	-0.404581	221	-0.814897	3.00705	4.03469	0.749348	1.24999	3.4483	3.04195	2.96171	4.15048	-3.02318	1.4066	1.78295	5.90301	0.804377	1.0396	2.82564	3.34025	2.49808	1.76045	2.8041	4.17274	4.81904	0.910602	4.2901	1.99865
222	1.08619	1.17707	1.49835	0.47834	1.15348	0.966313	0.465464	2.006	1.69118	1.72148	1.42409	1.60435	2.65725	2.19627	1.72411	1.5442	2.4489	1.65156	2.08802	1.39884	-0.520324	222	-0.987403	3.12216	2.66033	1.89703	0.974402	2.97672	3.01069	3.81144	3.93984	-3.21041	2.04104	1.66343	4.99674	1.82431	2.16572	1.55308	2.41927	1.70036	2.34141	0.369287	5.1094	5.29948	0.674916	3.13063	2.25801
223	1.86942	1.11792	1.67939	0.990571	0.78361	0.916749	0.970012	1.32062	-0.241767	1.50108	1.86594	2.77898	3.38219	2.5509	1.73995	2.02043	1.4514	1.5981	0.0909153	1.94345	0.219102	223	-0.579756	2.70626	3.6052	2.18376	0.650717	3.71923	1.87493	3.7387	3.69285	-1.59502	2.74842	1.475	5.03621	2.0602	2.25141	2.60292	3.67167	2.75805	0.614239	3.27623	4.51871	5.29641	1.36559	4.01401	2.63174
224	1.44311	-0.0360999	1.55694	0.412123	0.858198	1.17827	1.9844	2.38248	1.26963	1.98444	2.80206	1.82076	2.29987	2.42737	1.26687	1.23134	1.23296	1.07253	1.41391	0.758377	-0.410934	224	0.0375264	3.56925	3.53586	1.22795	0.495044	3.70152	2.01965	4.18976	3.47056	-3.24229	2.61661	2.88148	6.12534	2.03746	0.902462	2.72271	3.31371	2.27996	1.99332	1.31101	3.61271	5.28865	1.11177	3.72076	2.70691
225	1.98572	0.67696	2.64166	0.694118	0.655151	0.910729	1.97281	2.40504	1.4984	1.48184	2.20068	1.47935	3.52655	3.08776	1.92959	1.86119	0.982664	1.52704	1.42036	0.768418	1.24976	225	-0.141305	2.78087	2.85077	1.72879	0.823422	2.98385	2.14627	2.94755	3.46863	-3.31669	2.09993	1.93887	4.56138	2.21162	2.27835	2.69046	2.80137	3.06542	2.37882	3.24425	4.3067	3.93547	1.06768	4.94148	2.23387
226	2.23733	0.793286	0.715182	0.936688	0.806437	0.788782	1.83005	2.19227	0.821767	-0.120093	1.95961	1.07318	1.07962	1.71696	2.0659	0.779359	1.9927	1.91143	0.387303	-0.19197	0.893256	226	0.142727	3.69155	3.01059	0.352131	0.730725	2.96805	1.71514	3.09583	4.20098	-2.65776	1.99894	2.50479	4.86532	1.99617	0.882957	2.15512	2.29436	2.03583	0.642083	1.47454	4.05433	4.10275	0.979569	4.32685	2.61868
227	-0.198251	0.215524	2.73051	0.302278	0.929319	1.27112	1.81055	2.40199	1.1425	1.69907	1.26989	1.702	3.57714	1.31772	1.57194	0.98687	1.27819	0.890281	0.342052	1.04864	-0.316449	227	0.629061	2.77936	2.77839	1.33989	0.803595	3.26304	1.82699	2.16778	2.77041	-3.19084	2.02431	2.41292	6.19425	2.37545	1.91078	2.63911	3.02327	2.18741	1.78889	2.62777	3.558	5.21696	1.68072	3.54934	1.08926
228	1.76163	1.03447	2.70394	0.244991	1.20147	0.877874	1.88862	1.69597	0.623354	1.15849	1.8745	1.37435	1.95799	2.472	1.90083	0.376251	0.890679	1.41586	2.45009	-0.0657057	-0.00496671	228	-1.12647	2.61592	2.67281	0.845093	0.428839	2.40695	3.18744	3.67024	3.62873	-3.2567	2.245	1.16862	4.41573	0.140947	2.46306	1.70062	3.32872	2.14871	2.68626	1.4643	4.16853	4.46232	1.23904	5.34322	1.54985
229	0.0456318	2.19043	1.50989	0.793139	1.04022	1.13717	1.3587	2.01738	1.30271	2.0918	2.64326	2.0089	2.05545	1.09612	2.26052	1.35584	1.76494	2.15061	0.618613	0.838606	0.72136	229	-0.333663	3.09845	3.16634	2.72086	0.847246	1.85064	2.58476	3.38295	3.83005	-2.12613	1.61245	3.56809	5.94257	2.60425	1.2204	2.5346	2.69394	4.10866	1.82226	2.54641	3.78762	3.76984	0.880963	4.18938	1.67274
230	0.535562	1.24343	1.15701	0.613108	0.654248	0.959919	1.50664	1.51317	1.48424	1.97423	0.287473	1.4663	2.63693	2.64928	1.50436	1.75229	1.84261	1.90425	1.05878	1.44187	0.888339	230	-0.988977	3.26458	3.43341	2.43719	1.16676	3.44184	2.41018	3.27388	3.67747	-2.86912	2.91208	1.38028	4.64307	1.63892	1.4501	2.49357	3.34434	3.63429	2.13031	2.10412	3.90621	4.22779	1.03587	3.66685	0.925783
231	1.35184	1.30269	2.46845	0.419516	1.31196	0.797925	1.02422	1.54928	0.508484	1.44663	1.50961	1.49222	2.83671	3.02135	2.76657	0.897971	-0.114443	1.24734	0.845015	0.328689	-0.733617	231	-0.658095	3.30705	3.021	1.57144	0.701862	1.8512	1.92444	2.49859	2.83913	-3.13632	2.68009	2.16191	5.07824	1.59668	2.59312	3.04864	4.19779	2.41545	2.39537	2.26358	2.64414	3.21585	1.43452	3.86314	1.66099
232	0.224365	0.197191	1.34674	0.365176	1.23635	0.861725	1.43047	1.84183	1.04023	1.44223	2.37667	0.723028	3.48928	1.71233	1.56377	1.04497	1.2335	0.885321	0.487568	1.45294	0.743697	232	-0.269496	2.43601	3.3374	1.47315	0.664157	3.16334	1.47138	2.79289	2.70304	-2.21948	1.99586	1.90709	4.0009	1.29051	1.76526	2.52972	2.36916	1.7415	1.07983	1.89119	3.4073	4.87338	0.706888	4.33908	2.55018
233	0.204768	0.835747	1.1388	1.03691	-0.193955	0.610449	2.27044	1.38957	1.39882	2.33529	2.11389	0.832911	1.93675	1.3492	2.09582	0.630213	0.594337	1.68812	1.25104	1.06669	0.6062	233	0.090135	3.7434	4.14584	1.71043	0.222315	1.97923	2.92036	3.39776	3.18417	-2.33719	2.09192	1.62843	4.81634	1.5714	1.19093	2.4568	3.6478	3.99064	1.5365	0.900937	3.51333	2.51578	0.633405	4.24669	3.63457
234	0.144312	1.60566	1.58061	0.555796	0.507226	0.452535	1.13592	1.67909	0.403928	1.3226	0.307196	1.78532	1.87271	0.608208	1.53602	1.43027	2.06471	0.827154	1.13979	1.26051	1.02147	234	-0.507803	2.32812	2.24264	1.31821	0.293083	2.19295	2.37054	2.67965	3.69335	-2.90454	2.29211	2.42989	4.96063	2.46643	1.92496	3.36462	3.40658	1.78561	1.47281	2.60564	3.73358	4.90516	1.09652	3.62383	1.35811
235	-0.081705	1.84978	1.73834	-0.0548367	0.991795	1.03348	1.00685	2.52571	-0.140205	1.71993	1.76459	1.33237	1.77655	1.76588	2.18647	0.623682	2.2464	1.834	0.322471	0.627349	-0.494094	235	0.0476899	2.55049	2.24528	1.70521	0.722032	2.05601	2.89738	2.97211	2.9406	-2.07643	1.69685	1.37522	6.20325	1.60691	1.22197	1.84627	2.9699	2.36003	1.38151	1.20885	3.36291	4.42441	0.754446	4.64793	2.67811
236	1.33456	-0.191753	1.90884	1.34103	0.781168	0.625295	2.11973	1.6805	1.36472	1.71641	1.91415	1.69574	1.8214	2.38381	1.66812	1.47085	1.67569	1.18099	-0.15736	1.31491	0.554011	236	-0.9411	2.94584	2.82455	1.27374	1.0854	3.02204	2.54282	3.22798	2.92884	-2.12795	3.0436	2.36622	4.35669	0.40109	0.734023	2.31562	3.4881	2.65789	1.56203	2.26854	3.64677	4.86375	0.405005	3.42208	1.23358
237	1.43904	0.322769	1.28695	1.02935	0.78313	1.50078	1.73889	0.129714	1.14178	1.09698	2.10095	1.73031	2.4201	1.2376	2.31941	1.95991	2.2945	0.879391	-0.162197	-0.0881065	-0.505884	237	-0.0935264	3.48604	2.98754	2.48458	0.611276	2.86938	2.02601	4.55163	3.17447	-2.08018	1.24046	2.70213	4.87829	0.923654	1.80872	2.30384	1.79158	2.16407	1.31887	2.15684	4.17105	4.53768	0.644863	4.75007	1.54613
238	1.26461	1.44831	1.42102	0.384721	1.02303	1.33552	1.64822	1.1337	0.626599	0.286465	0.609733	-0.181863	2.7104	1.71764	1.75571	1.45046	2.25375	0.639154	-0.193006	-0.292411	1.36462	238	-0.302086	2.83982	2.86613	1.70282	1.3287	2.69135	2.5664	4.46291	2.76044	-1.6397	1.9486	3.42498	5.05377	1.81809	1.31585	2.66255	2.24125	2.13826	1.15128	1.53227	3.60714	4.17634	1.1642	3.713	1.83666
239	1.33663	2.31015	1.45243	0.732732	0.567363	0.266276	2.21989	1.81918	0.650746	1.22901	0.582012	2.34447	3.15262	0.56396	2.21118	0.612754	1.68538	1.35615	1.40893	1.37208	0.643981	239	-0.320327	2.98879	1.9061	1.27308	0.841409	1.83991	2.42197	3.76114	2.74519	-3.37472	2.07658	1.43216	5.01493	1.26134	2.13071	2.84638	3.07113	1.41761	1.79837	2.83296	4.05237	3.41646	1.56396	3.44997	2.6545
240	1.20076	0.693063	2.09614	0.722399	1.04797	0.452891	1.05578	2.79648	1.12912	1.67981	1.33113	0.629008	2.1747	1.58848	1.67736	1.46764	1.33933	1.26217	-0.0141917	0.820282	0.327524	240	-0.746376	2.86986	1.53687	0.804437	1.27817	3.06653	2.12369	3.50887	3.88588	-2.40159	1.907	1.22955	5.19292	2.16669	1.36618	1.97293	2.00417	3.34699	1.83089	2.52232	3.77937	4.18094	1.13272	2.7806	2.47605
241	1.34118	0.297463	0.675772	0.0980759	1.19888	0.406409	0.896783	1.95442	0.974601	1.20858	1.6803	1.40674	1.32757	1.38247	2.24125	1.46947	1.37526	1.99686	1.69033	0.34183	0.0489464	241	-0.448167	2.90565	3.10794	1.2421	0.348012	1.55149	2.23003	3.13383	2.48904	-3.04619	2.19688	1.47708	4.39723	1.96384	1.44346	1.65635	3.35012	3.59838	1.63375	1.27028	3.61158	3.84084	1.50726	4.13311	2.24488
242	1.33191	-0.302201	0.584697	0.832776	0.673439	1.00853	0.630106	2.45346	0.936183	1.05888	2.67184	1.90407	1.54027	1.79024	2.69345	0.973396	1.35606	1.145	0.905087	2.13473	0.920079	242	-0.147065	1.51054	2.77193	1.91455	0.607222	2.38461	1.88548	3.55413	3.65549	-2.88752	0.682926	0.740921	4.83349	1.21901	1.46265	2.78577	2.22046	2.75094	0.937034	2.45033	2.79091	4.793	1.06741	4.25489	2.71049
243	-0.241086	0.554475	1.8147	0.266808	0.960629	0.747642	1.3227	2.27165	0.931956	1.18011	2.83495	-0.116159	1.79154	1.67259	1.327	1.00446	0.880221	1.88336	1.61491	0.626043	0.0372716	243	0.313449	3.39218	3.05823	2.16324	0.181563	2.62601	2.71636	2.57768	3.18559	-3.41188	2.37322	2.53453	3.71053	0.184466	1.66329	2.02099	3.98891	2.18249	1.73494	1.8731	4.60147	4.10386	0.50697	2.94718	1.60212
244	0.562874	0.0445283	2.72046	0.919315	1.1407	0.810353	1.26571	0.831351	0.952982	1.84917	0.467631	1.95457	1.70419	2.72666	1.74441	1.55612	1.74102	0.783179	0.993195	0.162106	1.14499	244	-0.249583	2.53152	3.35853	2.42241	-0.100295	3.05163	2.46442	3.81088	3.65637	-3.01743	2.22167	2.7316	4.27613	1.07083	1.86169	2.93197	3.08547	2.63364	1.22045	1.68279	2.98523	5.08013	1.28425	2.75404	1.49606
245	1.24406	0.729522	0.970562	-0.365407	0.934846	1.229	0.811055	0.97745	0.733985	0.729993	1.65807	1.50916	2.01947	1.0913	0.593906	1.98606	1.92603	1.53033	0.746798	0.00509328	0.840233	245	-0.843747	3.68945	2.05768	1.87524	0.237095	2.37279	2.6957	4.33857	3.16896	-2.80664	1.84329	1.83301	4.13268	1.37898	1.48552	2.51576	2.32129	1.71847	0.716225	0.741898	3.14863	2.31959	0.612878	3.22883	1.62692
246	0.745238	0.303506	0.721736	0.624963	0.822625	0.825465	0.830831	1.4785	0.529106	1.10028	1.46107	0.0752413	1.80827	1.72283	1.90094	2.27185	1.34822	0.803272	0.764973	1.17877	0.278217	246	-0.331592	2.68519	2.34668	1.71511	0.351734	2.99701	2.51225	3.36827	2.39139	-2.17455	2.56355	1.68154	2.75861	0.862715	2.002	3.27762	1.88481	2.84638	2.13357	1.80941	3.14783	4.37092	1.03594	3.58196	1.61029
247	1.19313	0.822699	1.78299	0.68874	1.19318	0.676043	1.10076	1.07268	0.486796	0.681117	2.55408	1.03758	1.00553	2.55515	1.97474	1.08495	2.21622	1.28976	1.23739	0.861272	0.808853	247	-0.569758	2.37629	2.56339	1.78139	0.222498	2.75713	2.09575	4.13316	3.37882	-3.01151	3.21726	0.912151	3.49854	2.57668	2.38831	2.63456	3.80581	2.14237	0.564306	1.41486	3.40429	3.80626	0.633754	3.31909	1.29921
248	0.978433	1.63256	1.40295	0.662309	0.544353	1.08607	2.12615	2.02021	0.723642	1.4252	0.975268	1.79892	2.17545	1.43352	1.0543	1.86001	2.63713	1.89513	0.937406	0.959069	-0.428957	248	-0.973649	2.77704	2.80965	0.0951346	-0.334784	2.60425	2.44721	2.31343	3.38339	-2.80404	1.98962	0.758945	4.4942	1.60728	1.41504	2.05193	3.49854	2.63161	1.27016	1.19428	3.51687	5.21939	0.614379	3.8204	1.50751
249	1.83637	-0.634039	1.12793	0.538015	1.50383	0.906463	1.64423	1.71003	0.768519	0.831017	1.85618	1.60417	1.13015	2.64738	1.70027	0.450352	1.44061	1.53864	0.401099	0.280937	-0.104285	249	0.0423685	1.88434	2.89928	2.62043	-0.290424	3.22455	1.74887	4.11365	4.45084	-2.99304	1.94705	1.09527	3.99529	1.50773	1.84398	3.23347	2.57295	2.56806	1.0324	2.26431	3.07797	2.70705	1.06466	4.10116	1.37727
250	0.831611	-0.336592	1.53208	0.217541	0.387623	0.444954	1.77743	1.62664	1.34716	2.34545	1.55837	2.47741	1.1657	0.91724	1.2215	2.0544	1.30922	2.39199	0.922473	0.167115	0.452237	250	-0.0386666	2.79967	3.38566	2.04539	0.87274	2.84743	2.22236	3.28855	4.38448	-3.49338	1.70644	-0.194231	3.35351	1.3619	0.879674	2.25633	2.12297	2.40147	2.51983	0.936762	3.6694	4.09475	0.891781	2.90361	0.629715
251	1.28892	1.07953	1.87177	0.915811	0.610815	0.707775	0.875783	1.12966	2.02291	1.56648	1.60778	1.97137	2.14893	2.19122	1.85594	1.59393	1.30647	0.677869	0.848448	0.678273	0.199077	251	-0.174376	2.3711	1.20584	0.698004	0.705823	2.23645	2.06368	3.68263	2.97424	-3.50283	1.65214	2.94405	3.10522	2.28451	1.51295	2.09266	3.44004	2.98701	1.61321	1.38671	3.4481	3.87504	1.1543	3.72833	2.48188
252	0.529093	1.14615	1.69075	0.128503	0.784798	0.869789	1.70178	1.17889	0.511354	1.66172	2.40501	1.55566	0.550934	1.4383	2.39238	1.16759	1.34256	0.350348	1.69272	0.00761978	-0.428976	252	-0.509461	2.85361	3.07635	2.42991	0.335985	2.86603	1.85595	2.8641	3.61709	-3.31437	1.21557	1.10934	3.24888	1.71962	1.34508	2.20108	2.93311	1.58245	2.00977	1.39773	2.33735	3.96927	0.801413	2.0471	1.99689
253	-0.244335	1.34755	1.0451	0.609517	0.58487	0.400395	2.24723	1.68334	0.917338	1.73365	-0.0340444	2.30786	1.4095	2.51352	1.62741	1.7917	1.34697	1.93891	0.604062	0.590297	0.0191282	253	-0.484529	2.54706	2.5377	1.53432	-0.4297	2.65318	2.41208	3.16298	3.04675	-3.47618	1.84388	1.99664	4.09227	0.544646	1.84127	1.5719	2.71693	2.28959	0.449456	2.33863	3.27434	3.50654	0.982493	3.62291	0.1539
254	0.412025	-0.314966	2.04848	-0.0610186	0.827834	0.734098	1.3667	1.64151	1.20539	1.05069	1.88214	2.01002	2.55809	1.50362	0.807236	2.17765	0.41607	0.50075	-0.100566	-0.253537	1.33557	254	-0.655999	1.9414	2.23899	1.33316	0.331665	2.93432	2.29199	3.11906	3.21025	-3.5635	1.06627	2.22584	2.82151	2.01653	1.31298	2.90915	2.87624	1.75608	1.98372	0.502604	3.16763	3.85438	1.07491	2.4787	1.58736
255	0.369361	1.55562	3.3022	0.0469139	0.887878	0.439171	1.01013	1.47029	0.561495	1.91236	1.37075	0.577785	2.31632	2.08534	1.08066	1.63384	2.09923	0.685905	0.72392	0.843525	-0.937104	255	-0.550633	3.02809	2.6233	0.575029	0.44488	2.8026	1.81377	3.31826	3.69461	-3.29856	0.993009	2.45146	2.05422	1.89509	1.66354	2.72194	3.21262	2.33952	0.868723	1.87289	2.34271	5.28925	0.60792	3.38688	1.56723
256	-0.0717457	0.937937	0.451333	0.940082	1.23623	-0.235575	0.451354	1.09012	0.272742	1.78659	2.28639	1.50391	1.21043	1.76784	2.51041	0.489481	1.57133	0.312538	0.903417	0.389577	0.386407	256	-0.28547	3.2269	2.751	1.7462	-0.0531805	3.05017	2.4728	3.29621	3.01356	-3.52121	2.31113	1.68562	1.98199	1.69874	1.70952	2.92823	3.3048	2.20671	1.22686	0.653122	2.77103	4.0835	0.984222	3.26099	1.43136
257	0.958545	0.202386	0.90383	0.0306972	1.20701	0.823228	-0.130122	0.496822	0.724805	0.721245	1.40683	2.26748	2.5622	2.67232	0.837242	0.361658	0.807599	0.784266	0.560351	0.730972	0.105806	257	0.406284	3.1527	2.14502	0.211779	-0.440452	2.5028	2.19597	3.32306	2.78417	-3.09768	2.31433	1.18328	3.35027	1.77347	0.735825	2.32457	2.91472	2.59889	1.29267	1.21802	2.53517	3.70003	1.09285	2.71827	2.43921
258	-0.466506	0.589614	2.06265	0.406453	0.518632	1.84544	1.44647	1.6656	0.874759	1.18512	1.40706	0.62144	1.51465	0.923424	1.54126	1.33733	0.714555	1.4661	0.733035	0.474644	-0.831699	258	-0.225539	1.88218	1.79941	1.31561	0.625698	2.77536	3.31419	3.99989	4.30429	-2.66985	2.17655	1.50175	3.20494	1.39588	1.41575	2.3973	1.81441	2.90691	1.10253	2.14704	2.55727	3.84163	-0.0974762	3.8672	0.474309
259	0.417041	0.521601	1.31308	0.450836	1.0578	0.627999	1.06738	1.53131	0.641456	0.848401	1.23782	1.11177	-0.758788	1.79662	2.59675	1.17678	0.637998	1.35696	1.00693	1.01689	-0.428304	259	0.160172	2.70914	1.07473	1.57509	-0.454208	2.25325	1.975	3.17216	2.96313	-2.86295	1.91713	2.46178	2.94335	1.11754	1.28601	2.12883	1.35522	3.32863	0.395405	1.62967	3.48506	4.30229	1.02079	3.10502	2.12452
260	1.75439	0.2699	1.08323	-0.209822	0.528196	0.153445	1.42213	0.782585	0.652024	1.20415	0.952166	0.620971	1.74184	1.65683	0.369401	0.999353	1.76225	-0.291962	1.46365	0.938771	-0.601737	260	-0.195321	2.11523	1.24867	2.41134	0.218957	2.49829	1.87608	2.46129	3.67371	-2.62881	1.63273	2.3324	4.11233	1.5312	1.51506	1.64291	1.84888	2.78925	1.23625	0.879174	4.1567	2.48948	1.25858	3.79678	1.73344
261	1.20144	0.830459	1.87339	0.586327	-0.10034	-0.154789	1.56448	1.72486	0.786974	0.947551	1.12593	1.14116	2.0352	1.59572	1.79699	-0.501612	1.34749	0.784766	1.26157	0.868522	0.424728	261	-0.101601	3.79685	2.14473	1.18472	-0.0846216	2.87118	1.6349	2.65562	2.25288	-3.10584	0.897318	1.88745	3.03692	1.63955	1.56279	1.41609	1.66583	2.67892	-0.0174947	1.25066	3.10146	3.5517	1.19338	4.22953	2.0968
262	0.0442781	2.44428	1.99776	1.04893	0.631034	0.769799	1.84045	0.681089	0.0117954	0.738286	0.473091	1.66109	1.567	1.41287	0.503715	0.00179441	1.11482	1.6005	1.01332	0.0868445	1.51287	262	-0.049544	1.73097	2.60924	2.11439	0.393756	1.55947	2.01219	3.02337	2.64692	-3.12792	2.25778	1.59192	3.88975	1.66554	1.4627	2.53942	3.21713	2.16787	0.974344	1.86333	2.10757	3.14374	1.27342	4.10233	2.12
263	0.0865553	0.818765	-0.121128	0.802161	1.18532	0.23861	1.24687	1.051	0.821962	1.90907	1.88809	0.365772	1.46135	1.99271	1.19561	0.895873	0.641716	1.40926	1.17203	0.432735	0.234819	263	-0.0450279	2.0177	1.79554	1.9573	1.29542	2.37659	1.75886	2.62006	3.20289	-2.23146	1.41691	2.0338	3.99318	2.20355	1.68733	2.4285	2.99931	2.26689	1.37991	1.2796	3.91075	3.4597	0.663335	3.44332	2.14938
264	0.886481	-0.248754	1.34366	0.273556	0.343198	0.583514	2.4801	1.15954	0.529316	1.15238	0.818978	0.949753	1.74396	1.59458	1.09352	0.96107	0.374337	1.65322	1.34415	0.984024	0.156001	264	-0.367624	3.11526	1.56073	0.800566	0.470968	1.60899	2.37477	3.94673	2.36883	-4.06843	1.00635	1.3512	4.71536	1.90075	1.19375	1.62704	2.80377	2.57871	0.845153	1.58584	3.44989	3.4384	0.498341	3.79844	2.14889
265	-0.283812	1.3653	2.11125	-0.399628	0.101817	0.884525	2.20275	0.341302	0.806331	1.31715	2.269	2.15398	2.12649	1.40818	1.44334	1.10254	0.144959	1.50561	0.101784	0.406449	0.505463	265	0.0440753	2.51146	1.9444	2.20432	0.3018	2.45184	2.6112	3.48299	2.77588	-2.82216	2.15205	-0.298834	4.23328	2.01362	1.62777	1.84881	1.53731	3.10312	1.37523	1.65212	3.84938	4.01277	-0.0170721	3.96717	2.35221
266	0.346586	1.97919	0.594251	1.08041	0.0654048	0.520503	1.09857	0.309376	0.334991	-0.414335	1.93707	1.20238	0.646199	0.770481	1.22241	1.10646	1.0604	0.775349	1.37169	0.810347	1.38353	266	0.300822	2.40698	1.8942	0.450433	-0.0557841	2.14366	1.26511	3.1927	3.12379	-2.86664	2.06349	-0.612429	3.89626	2.17951	1.01603	2.61498	2.05668	3.1637	1.07719	2.34169	1.58507	3.14883	1.44674	3.14716	0.841141
267	1.13432	0.499068	0.29166	0.283537	1.13506	0.758639	1.14299	1.80804	0.191436	1.07585	0.708911	1.08258	0.0128575	2.03497	2.02383	0.601658	0.541763	1.02469	1.05505	1.13281	-0.458075	267	-0.780547	1.50378	2.64782	1.40028	-0.143573	2.24238	2.23082	3.33737	1.55733	-3.6615	1.91524	0.955796	2.18981	1.71804	1.18394	2.06539	1.44752	2.30121	0.798334	0.0103533	2.29761	3.97671	-0.157467	4.51345	0.791487
268	1.0087	0.337987	1.42031	-0.521779	0.334365	0.573974	1.75144	1.46302	0.66496	1.09125	1.19091	0.459621	2.24281	1.02868	1.43509	1.37141	0.707854	1.34045	0.544498	0.922107	0.76116	268	-0.701634	2.71455	0.826044	1.06027	1.42525	2.21022	2.26058	1.69648	3.75648	-2.99582	2.13918	1.55953	3.7636	0.46661	1.08489	2.30937	2.76547	2.80386	2.10324	1.38037	3.42958	3.89422	0.463491	2.7952	2.2671
269	-0.0591787	0.385605	2.53207	0.654726	0.775423	0.694958	1.17293	1.60046	0.439371	-0.515717	1.46747	1.22428	1.87972	1.44715	0.825688	0.892528	1.8474	1.3541	-0.100846	0.410041	0.426768	269	-0.228947	1.9979	2.20604	-0.0625059	-0.433328	2.28223	2.0825	3.24178	3.23686	-3.25015	1.26533	0.635496	4.24679	1.91734	1.23847	1.99363	2.53712	2.71851	0.230225	0.684969	3.37844	3.48333	0.527166	2.94309	2.27388
270	1.16684	0.842188	0.488896	0.832068	0.127356	-0.0202111	0.281005	0.624853	0.480307	0.796685	1.21383	0.422124	2.44997	1.2462	1.97779	0.74245	1.5898	1.34032	0.565881	0.447743	0.520907	270	0.484691	1.54915	1.82207	1.55664	0.461836	3.03719	1.9862	3.33441	3.20425	-3.29442	1.84916	1.95274	3.53505	1.20241	1.74011	1.66748	3.5894	1.26107	1.22297	1.84738	3.82554	3.93113	0.0150586	3.15757	1.00083
271	1.22243	0.398995	0.594783	0.0916011	0.891563	0.439151	1.56045	1.43997	1.59109	0.352391	0.848191	0.785921	1.66299	1.95695	1.36062	0.904854	0.900885	1.07456	1.11236	0.560614	0.816794	271	-0.971684	2.80398	1.80105	1.82602	-0.835432	2.14825	1.85398	2.56316	3.06055	-3.27467	0.849127	1.43775	4.14757	2.12937	1.45185	2.30128	2.48408	3.42683	1.07635	1.31011	3.28191	2.32296	0.603075	3.67638	0.916672
272	0.477106	0.572171	1.23837	0.823288	0.699645	0.824107	1.27308	1.73	0.306951	2.1114	1.55196	0.563597	1.67981	1.76325	0.741757	0.961547	0.889296	1.87241	0.0824007	-0.137408	0.000438645	272	-0.569704	3.06628	1.10903	1.31142	0.26407	2.54929	2.22015	2.33655	2.63525	-3.35366	0.939238	2.56105	3.88033	0.301134	1.10602	2.00553	1.8658	3.30207	0.509144	1.70234	3.05634	3.24081	0.81053	3.56437	1.61684
273	0.0669535	1.30328	3.01263	0.993661	0.677456	0.360052	0.698266	1.93187	-0.598124	1.54327	2.04489	0.629624	1.07244	1.60833	1.74509	0.685288	1.20889	1.72017	0.357479	0.894014	-0.0294516	273	-0.372226	2.00707	2.3917	2.17429	-0.616828	2.66187	1.66645	3.7237	2.78542	-3.30561	1.37224	1.792	4.4007	0.889929	1.25883	2.4411	2.6894	2.76572	-0.192855	1.30094	2.49057	3.61382	0.858917	3.3436	1.93065
274	0.747903	-1.41946	2.24712	0.566369	0.231006	0.257444	1.46488	1.3304	1.02464	0.836102	1.16943	1.20503	1.82613	1.2954	2.29112	-0.341618	0.891762	0.560557	0.42144	0.88377	-0.000635465	274	-0.562551	1.91969	1.79776	0.776859	-0.372443	1.78834	1.73847	3.37332	2.74263	-2.72588	1.936	-0.00464078	2.42788	0.91683	1.20548	2.89417	2.37238	1.3603	0.953657	1.88183	2.12616	2.38708	2.13295	2.07244	1.41868
275	-0.34447	0.783089	2.17621	-0.0584036	0.714044	0.0376239	1.43047	1.41621	1.06354	-0.745204	0.58662	0.271812	1.22006	3.04336	1.37669	0.331337	0.771274	1.33163	0.949512	0.0592849	-0.428231	275	-0.0809732	1.79522	2.25558	1.04468	-0.422733	2.50687	1.68532	3.10042	3.31529	-3.64291	1.37683	0.610323	3.3895	0.539733	1.29974	3.33653	2.11714	3.35626	-0.0666219	1.67833	3.51211	3.06475	0.63008	2.01291	1.13258
276	1.58035	0.660171	-0.0414187	0.761514	0.398611	1.10656	1.13163	1.22861	0.996689	1.9029	0.632726	1.06408	1.78443	1.13903	1.27021	1.66021	1.72906	0.532502	1.12194	-0.283977	0.759762	276	-0.306471	2.95575	2.59404	0.235728	-0.34481	2.80381	1.25308	2.66258	2.92792	-2.92304	1.68442	1.44998	2.90567	1.52099	0.927192	2.74899	1.79284	3.22393	1.10653	-0.804765	3.37289	2.72648	0.487806	3.6887	1.45547
277	0.00474917	1.00202	2.0039	0.619282	0.869849	0.555527	1.47541	0.711275	0.97469	0.863366	-0.061159	0.208466	2.50726	1.43575	1.46475	0.983172	1.05876	1.87492	-0.664071	-0.288497	0.46511	277	0.336291	2.28369	0.969017	1.87102	-0.29072	2.3136	1.07873	2.39374	1.77159	-3.14839	1.09084	1.35843	3.74987	1.33682	0.712098	1.98538	3.25296	1.39366	0.107562	1.43177	2.81292	4.03074	0.721512	3.05791	1.03562
278	1.96148	0.198541	1.04206	1.23739	0.792961	0.236501	1.34327	1.20429	0.108344	0.730563	0.556757	1.41534	0.43421	1.08508	1.27325	1.3467	0.780624	0.382781	0.684868	0.0820071	-0.224142	278	-0.944936	2.50678	3.33055	1.13709	-0.328189	1.97532	1.52697	1.46456	2.85131	-3.10935	1.55023	2.29141	3.70584	0.873315	1.32714	2.66505	2.91343	1.91793	1.08373	1.10475	2.65598	3.46266	0.699695	2.6061	1.4124
279	-0.44272	0.720789	1.64292	0.550233	0.31643	0.368936	1.62946	0.715981	0.385149	1.77046	1.46666	0.610111	1.84707	2.21795	2.79145	0.728929	2.3336	0.109597	0.130964	0.195248	1.25197	279	0.194317	2.78125	1.78459	1.60191	0.449192	2.87659	2.34691	3.75902	2.24133	-3.03014	1.34074	0.807713	3.34768	0.527083	0.620277	1.75993	2.81656	1.82219	0.54727	1.92901	2.36881	3.09829	0.238066	4.42272	1.25384
280	0.679577	0.0766083	0.976238	-0.525307	0.849882	0.770205	1.77265	2.24335	0.798161	1.22398	0.427268	1.75484	0.688661	2.02964	2.22834	1.64085	0.309515	0.607739	0.430118	0.703823	0.182415	280	0.334065	2.23618	1.95931	0.979463	-0.0566072	2.32736	1.35106	2.57979	2.30024	-3.18413	2.4927	1.78204	2.56005	1.57341	1.94416	2.48833	2.99175	3.15629	1.007	1.60812	1.77383	3.24675	1.72886	3.14356	1.06604
281	-0.0369356	-0.0344812	-0.0880595	0.442736	0.529888	0.909702	0.768569	0.814456	1.70681	1.10399	2.34636	1.33976	1.07149	-0.0956141	0.489441	1.02219	0.956373	1.37332	0.317913	0.317065	-0.158182	281	-0.177432	2.08053	2.34582	1.39901	0.269199	2.42381	1.11392	3.35315	2.10738	-3.10113	1.4252	1.56023	3.27883	1.29968	0.956217	2.44112	1.81778	3.18042	0.489756	0.897305	2.0023	3.5767	0.851854	3.97781	0.574788
282	-0.504188	0.17867	0.751682	0.667281	0.840268	0.472874	1.49979	-0.0295484	0.869289	1.16125	1.81423	1.4258	1.75034	1.36805	1.53058	0.333541	2.06719	0.251585	0.416076	-0.224859	0.325688	282	-0.0236687	1.97519	2.37886	1.05864	0.41345	1.7222	2.5423	2.74517	3.44026	-3.25037	1.3204	1.71156	2.94329	1.26839	1.21228	1.87623	1.9987	2.11816	0.984749	1.44318	3.13223	3.5024	0.756652	2.80413	2.44095
283	0.360364	-0.509419	0.331532	-0.0947263	-0.177774	0.731473	1.39672	0.944786	0.770643	1.28113	1.48391	0.675918	2.03015	1.31765	1.21068	1.74668	0.878141	1.25659	0.742268	1.05673	1.62319	283	-0.351347	1.45076	2.76785	1.80061	-0.595273	2.24369	1.09657	3.44091	2.40011	-3.30697	1.41474	3.00117	2.89913	-0.221841	0.786283	1.93364	3.37707	0.749915	-0.269343	0.535262	3.401	3.65046	0.896931	1.85438	1.59963
284	1.09106	0.114249	1.79533	-0.0907828	0.376597	-0.142654	1.47241	1.82746	0.49983	1.17286	0.874933	1.02631	1.63071	1.29576	1.3478	0.136476	1.64949	0.556282	-0.322273	1.42204	-0.995216	284	-0.487019	0.822649	2.12641	0.506446	-0.089521	3.26922	1.08189	2.61805	2.47048	-3.40515	0.680642	0.127597	2.4617	2.09099	0.69246	1.46765	2.65988	4.40914	0.294777	0.836304	2.71665	2.74724	0.588136	3.25846	2.62741
285	0.968059	-0.0770894	0.152282	0.518563	0.905302	0.398959	0.93438	0.757459	0.58341	0.817604	1.74554	1.27654	1.52899	1.80365	1.39354	1.78145	0.887359	1.17385	0.720904	0.0680442	-1.37119	285	-0.522447	1.583	1.12198	1.66837	-0.790232	1.85773	1.15172	2.83293	2.04153	-3.16485	1.54611	1.4269	3.499	0.945283	0.799296	1.88492	2.07097	2.57107	0.462095	1.95284	2.25196	3.22673	0.649074	2.50132	1.04534
286	0.63228	0.782852	0.814481	0.537379	0.105928	1.01059	0.940561	0.135522	0.316033	1.30729	2.09154	1.51575	1.37127	0.534905	1.17875	1.74158	1.60836	-0.209105	0.751563	0.900044	-1.13962	286	-0.322164	1.79444	1.5579	2.111	-0.439543	2.04176	2.28652	2.16134	2.842	-2.97539	1.46609	-0.260176	1.85722	2.00721	2.15326	2.07228	2.47821	1.8117	0.0230205	0.677319	2.36724	2.95731	0.900676	3.66868	2.22978
287	0.699595	0.521101	2.45439	0.625652	0.250723	-0.594047	0.968175	0.906716	1.15256	0.610483	1.2129	1.98319	2.05657	1.42236	1.3067	1.26485	1.53572	0.0284584	1.01932	0.0866126	0.906526	287	-0.566627	1.4738	2.46402	1.55145	-0.616773	1.29009	1.60802	2.41766	1.93477	-3.67854	0.935231	2.37367	4.31317	0.833296	0.549871	1.88199	2.16662	2.86745	0.632526	1.27649	2.8316	4.22449	0.45879	2.71341	1.50194
288	0.715415	0.194317	0.273434	0.835631	0.737475	0.849165	1.8899	0.811627	0.10576	1.22068	1.39227	0.302932	1.26687	1.73024	0.736385	0.843071	0.619631	0.685988	0.964719	0.474652	0.260887	288	-0.521663	0.763633	2.79176	1.30849	-0.712575	2.30306	2.33917	2.56629	2.06757	-2.00675	1.41572	1.94604	2.87253	0.795911	1.21112	0.236033	3.15258	3.55935	0.585428	1.92304	1.65075	3.63137	2.12035	3.03174	2.60127
289	0.434766	0.866981	0.95218	-0.0752722	0.0271551	-0.0758102	1.05713	1.37678	-0.198603	1.46575	2.28903	-0.513167	2.12338	2.44181	1.21442	0.931415	1.20045	0.833853	0.681203	1.3415	-0.13108	289	-0.0346879	1.64484	1.13939	1.45248	0.142305	2.56186	1.8279	2.68548	1.68289	-2.58103	0.594347	1.52824	2.96582	0.696586	1.75932	1.32003	1.59761	2.48417	1.65169	0.675032	3.45906	3.05282	0.809553	2.82321	1.47686
290	0.598938	0.46524	1.76117	-0.0853662	0.543923	0.677156	0.69908	1.09766	0.535811	0.821564	1.08818	0.709576	1.77149	2.02152	0.174914	0.797677	1.56365	0.698784	1.75744	-0.0368645	-0.270343	290	-0.384953	2.0128	0.809859	1.9834	0.118955	1.97555	1.87887	2.85549	1.82411	-2.94951	1.10324	1.60454	4.0196	0.36925	1.65164	2.44939	2.42638	2.48856	1.26642	0.67072	2.71437	3.31747	0.72942	3.14986	1.45364
291	1.08279	1.03382	1.59815	0.356315	1.0537	0.175578	0.734054	0.498021	0.150142	0.0563995	0.683772	1.89672	0.515978	0.347706	1.61624	0.344798	1.49633	0.812909	0.591898	-0.59123	0.306456	291	-0.0929961	0.6857	1.57516	1.5943	-0.0647899	1.30698	1.55772	2.126	2.68271	-2.89246	1.50734	2.40446	3.34336	1.61926	0.606595	1.61886	2.05305	1.10136	1.21574	0.106598	2.65067	2.3959	0.0149259	1.5815	1.39628
292	1.13255	0.0126591	0.947143	0.554607	0.190255	0.0970447	1.75052	0.717168	0.655089	0.938631	-1.4999	0.354323	0.691775	1.9161	0.520987	-0.411127	1.4901	0.551365	1.28401	0.997747	0.579466	292	0.0777899	0.898776	2.90065	2.08755	-0.0581615	1.53993	1.9369	2.91704	2.33464	-2.844	0.58112	-0.438862	2.88633	1.16639	0.973191	2.19157	1.92875	3.19492	0.686093	0.36213	2.47742	4.16347	0.99932	3.05639	1.65243
293	0.49113	-0.939459	1.30825	0.53888	0.402808	0.46593	0.476007	1.52089	0.839215	1.48495	1.66829	0.82657	1.13487	1.18453	-0.382441	1.44062	0.442824	0.525528	0.802257	0.308879	0.378401	293	0.0212228	1.62097	1.02896	0.283602	-0.264866	1.90748	1.47613	2.53706	1.75549	-3.34489	1.80375	1.2112	3.16297	2.02078	0.884475	2.62117	1.80242	2.48774	0.496328	1.20947	3.78807	3.00415	-0.179976	2.89074	1.90211
294	0.269759	-0.12661	0.75633	0.660968	0.612536	0.477802	0.433703	0.931025	0.233641	0.502449	0.798084	0.766795	0.895999	1.23744	1.0657	1.04398	2.12867	-0.581943	-0.640411	-1.06759	-0.147778	294	-0.833098	2.39183	1.19323	1.45061	-0.256608	2.00633	1.01035	1.44425	2.7919	-3.36843	1.00729	1.84314	2.76633	-0.0514116	1.36353	1.13445	2.73837	1.93129	0.382712	0.859093	2.7093	3.48592	0.0461813	1.29508	1.74554
295	-0.431902	0.197826	1.33141	-0.16219	0.645428	0.858582	0.79025	1.13451	0.583103	0.671574	1.14742	0.504559	2.02109	1.10463	1.33026	2.34232	1.61849	1.40441	1.56236	0.262035	-0.546141	295	-0.11687	1.52329	1.31436	0.114437	0.774575	2.12235	1.94659	2.65542	2.34116	-3.53534	0.637582	1.73952	3.20234	1.34182	0.877509	2.03608	1.62446	0.733849	1.64052	0.73721	3.04437	2.30852	-0.0233786	2.88513	1.52045
296	1.48661	1.30507	1.36185	0.554971	0.830045	0.634369	1.13828	2.0941	-0.393597	2.17057	2.10884	0.788744	0.926907	0.623067	1.57613	0.0304262	0.703464	0.45439	0.356696	0.585883	-0.272061	296	0.813127	2.48502	1.79864	2.23295	-0.157559	2.26248	2.16082	3.15366	2.58022	-3.40669	1.27528	1.36365	2.5869	1.64934	1.29744	1.58184	2.18531	2.59122	1.21516	1.96433	2.33755	2.71933	0.867316	2.70878	1.62019
297	0.219626	-0.376383	2.0009	0.365621	0.617379	0.573526	0.424569	1.23262	0.546988	-1.03552	2.33754	0.0438757	1.77566	1.83702	1.38793	0.398883	0.556352	0.261908	-0.152544	0.0878656	0.171281	297	-0.290861	1.11484	2.5853	1.61758	0.60465	1.86569	0.963382	1.96903	2.08604	-3.42321	1.16991	2.48301	3.10996	1.04417	0.829929	1.31382	2.46129	1.42585	0.0566794	0.803499	3.19745	3.10132	0.858762	3.22903	1.2031
298	-0.0811227	-0.206271	0.408732	0.4684	-0.39835	0.467769	1.50635	0.819384	1.35682	1.86501	0.80138	0.81998	1.37821	1.34743	-0.701014	0.582242	0.601108	-0.0151934	1.40217	0.294868	-0.527886	298	0.317644	0.625209	0.874163	1.82171	0.257038	1.85009	1.24351	2.5566	2.26092	-3.83396	0.718425	1.19084	4.19256	1.21121	1.22054	2.45874	1.44402	2.58643	1.03765	1.97513	3.02335	3.20676	-0.0785694	2.38693	1.06164
299	0.292151	-0.950706	1.16046	1.25542	0.417314	0.976523	1.8573	1.19216	0.170249	0.774213	1.02341	0.658121	1.6796	0.596348	0.678704	1.49613	1.06132	0.258162	0.946023	-0.464465	-0.479452	299	0.230885	1.07055	1.88428	0.9559	0.405469	2.16328	1.60824	2.6105	2.28314	-4.53026	1.15626	1.7392	2.96456	0.687673	1.03525	2.65702	2.47858	1.76906	0.276066	0.833802	1.89797	2.12267	0.368033	2.80454	1.59358
300	0.694326	0.446626	1.8625	0.181164	0.558659	0.781829	2.04593	0.698849	-0.02233	0.740715	0.541223	0.811201	1.73384	1.77835	0.535814	1.9757	0.0477585	-0.384897	0.778244	0.942282	0.14617	300	-0.443931	1.8743	2.2199	0.654393	0.43172	2.3444	0.819767	2.565	2.7251	-2.48479	0.381807	0.208741	3.48133	2.11829	0.416314	1.1693	1.69869	2.24538	0.826087	0.917254	2.81816	2.91586	0.479002	1.72311	0.834478
301	1.0558	0.37344	1.66097	1.22352	0.788148	-0.170632	0.760696	1.38392	0.695122	-0.653104	1.11382	1.50638	1.77659	1.7187	1.27196	0.72894	0.190679	0.733773	-0.192369	-0.382787	-0.0697002	301	0.302795	2.51791	0.589392	2.29799	0.314533	2.15415	1.19087	3.28936	2.73051	-3.04434	1.18441	1.97136	2.96474	0.408643	1.90132	1.7583	1.4582	1.26652	1.17695	0.701408	2.14674	3.38224	0.210561	1.97984	0.738491
302	0.297294	-0.187954	1.04306	-0.100052	0.903463	0.0432347	0.527731	1.7449	1.13521	1.41392	1.05492	2.44467	1.43152	1.92786	0.773258	2.21521	0.82024	0.622533	-0.071588	0.103106	0.181649	302	-0.665969	1.33929	2.06862	0.220557	0.747989	2.16841	1.707	1.5649	1.83565	-3.35679	1.56239	2.48932	2.11817	2.16308	1.24013	1.87026	2.09558	1.58702	0.0550042	0.581358	2.90616	3.14847	0.558691	2.96248	0.86823
303	1.15081	0.612341	0.775069	0.322471	0.389776	0.564425	1.09319	1.52102	0.394135	0.00952073	1.77141	0.905671	2.10953	2.44595	1.52811	1.21734	1.08489	1.37043	0.8585	0.0305942	-0.51149	303	-0.773848	1.48616	0.329887	1.6707	-0.721023	1.05941	1.3245	1.83858	1.77717	-3.9693	1.09026	1.15576	3.3716	1.72383	0.882106	1.81505	0.942609	2.45337	1.85332	0.12487	1.56588	2.71326	1.09402	3.15382	1.87602
304	0.2103	-0.919809	0.87582	0.775076	0.318101	0.101076	0.62373	0.239017	0.0818713	0.649479	2.07693	-0.338429	1.20735	1.97041	0.914514	0.220209	0.853729	1.03645	0.320584	-0.573805	-0.111654	304	-0.432111	1.5032	1.36984	2.16268	-0.87799	2.27621	2.29924	1.70866	1.49297	-2.97122	1.6666	0.429255	4.07994	0.901004	1.98557	1.40739	2.03601	2.13566	1.87085	1.04277	1.93101	3.50862	0.959543	1.92993	0.459708
305	-1.01272	0.399126	-0.312438	0.86891	0.445978	-0.146139	1.04907	1.13934	0.695849	0.197294	1.5561	-0.025885	1.2864	1.89041	1.27456	1.3049	0.0748363	1.50367	0.787722	0.633919	-0.182914	305	-1.3013	1.71744	1.20504	1.58559	-0.0800445	1.72512	1.49927	2.96625	2.25327	-3.16192	1.38657	1.70686	3.82661	1.30975	1.15869	1.42045	2.07366	2.10176	-0.664669	0.523198	1.81409	2.12031	-0.194397	1.72586	1.63563
306	0.546589	0.389947	1.68011	0.689542	0.600172	0.249664	0.627381	1.28556	0.584866	1.42862	1.21791	0.70074	1.49529	0.89611	-0.112721	0.811599	0.30761	0.661332	1.03406	0.0143856	0.535536	306	-0.5435	2.58755	1.10261	0.583551	0.552877	1.53198	2.44265	2.48644	2.40805	-3.33497	1.3546	0.949187	4.1694	1.06257	1.0109	1.92097	0.39614	1.58549	1.40475	0.654046	2.40243	2.48256	0.115128	2.27846	1.10708
307	-0.00496792	-0.0308894	1.45454	0.189297	0.391367	0.561833	0.879419	0.340308	-0.702266	1.08179	1.74693	0.305133	0.518733	1.40176	1.52499	0.625132	0.222381	0.232276	0.197705	0.487634	0.715591	307	0.0392984	1.38062	-0.176172	1.654	-0.344464	0.8819	1.39612	2.34332	2.37891	-4.04601	0.926727	0.849884	2.95043	1.33799	0.102346	1.84192	1.44028	1.88368	1.29771	0.521898	2.29589	3.21171	0.338153	2.08551	1.41366
308	0.56138	1.12473	0.880986	0.47866	0.917994	0.946494	0.875669	0.874261	0.619374	0.384204	0.550789	0.229472	0.150838	0.581678	0.32851	1.42814	1.93994	0.610261	0.201886	0.934805	0.463722	308	-0.75492	1.30974	2.08069	1.22074	0.63592	2.4124	2.47851	2.86946	2.2106	-3.93454	1.35091	1.46083	2.18549	1.46798	-0.0493032	2.19108	1.89289	1.81861	1.31604	0.683518	2.00649	1.54385	-0.0521494	3.09562	-0.109116
309	-0.161348	0.367533	2.37412	0.18918	0.413035	-0.24468	1.35161	1.68391	-0.602062	0.055885	0.323582	1.4728	0.345421	0.792208	0.016307	0.534691	0.945994	0.0695736	1.49743	0.686056	0.146446	309	0.271444	1.76795	1.96073	0.632223	0.349999	1.55231	1.50692	3.34308	1.74917	-3.5741	1.45972	1.15536	3.05412	0.644342	0.791424	1.85492	1.97	2.28201	1.58106	1.17979	2.07338	3.52452	0.0850946	1.52575	-0.0601569
310	0.2898	1.1634	1.27699	0.879731	0.587152	0.812328	0.311036	0.471303	0.827629	1.10277	0.876126	0.0196227	1.14479	1.30499	-0.01159	0.366355	-0.641908	1.25739	0.732962	0.2647	0.0603392	310	0.216235	1.34683	1.77317	0.46051	0.0411503	1.83849	1.81731	2.70323	2.71185	-3.76981	0.54558	0.677538	4.09106	0.458341	0.877669	1.35548	2.0278	1.24168	0.999047	-0.0901	2.50488	2.77313	0.663863	2.10649	1.44976
311	0.408883	0.4872	1.16744	0.614834	-0.0172285	-0.10032	1.44899	0.0118893	-0.863486	0.605544	1.67761	0.400246	1.41425	1.19301	1.43823	1.272	-0.523105	0.135051	0.539811	0.305169	0.849558	311	-0.733106	2.33565	1.51625	0.787259	-0.401189	1.11491	1.24576	2.07339	1.97333	-2.69001	0.709958	0.885508	3.14944	0.297899	1.12144	1.90528	2.34323	3.37625	0.401392	1.04588	0.904328	2.83182	0.26469	1.40788	1.07364
312	0.965219	0.348409	1.18436	0.473663	0.185392	0.289569	0.366269	0.666943	0.086367	0.420106	2.09241	0.232015	1.07386	2.0416	0.494166	1.5566	1.18053	0.288489	0.605765	1.17168	0.51789	312	-0.371854	1.95049	0.891681	1.89546	0.113881	1.91504	2.46153	2.11791	1.40133	-4.03949	1.51996	1.77841	4.36378	0.90551	0.606765	2.20596	1.32981	3.05101	0.2783	0.804492	1.84725	2.81231	0.75639	2.02493	-0.243756
313	1.4023	-0.100277	1.47052	0.0771383	0.69478	1.06704	0.544034	0.804322	0.553761	0.529856	-0.109834	1.46087	1.45728	2.09707	1.10361	1.03612	1.30987	0.162357	0.970831	0.322639	1.40286	313	-1.0281	0.899621	1.78541	2.01663	0.375522	1.29309	2.20846	1.92127	2.71865	-2.60828	0.12202	0.941131	3.63044	1.37402	1.06629	2.08624	1.67019	2.34679	0.431104	0.573889	1.73293	2.52965	0.624031	2.11608	1.18062
[truncated: 512 more rows]

## Sheet: Fig 7F
Source Data	Figure 7F	AWC VGLUT-pH data: Tau values from single exp fits
[truncated: 51 more rows]
