# Supplementary material for: Diverse modes of synaptic signaling, regulation, and plasticity distinguish two classes of C. elegans glutamatergic neurons
Source: eLife. 2017 Nov 21;6:e31234. doi: 10.7554/eLife.31234 (PMC5705214; doi:10.7554/eLife.31234)
Supplement: Figure 8—source data 1. [file elife-31234-fig8-data1.xlsx]

## Sheet: Fig 8A,B
Source Data	Figure 8A,B	AWC SyGCaMP & VGLUT-pH data: individual dF/F(%) traces
		Three trials per animal: Read from left to right; Trial 1 signifies a new animal
		Acquisition Rate: 5 Frames/sec
		Pulse 1
		Stimulus ON:	Frame 25
		Stimulus OFF:	Frame 325
	wt SyGCaMP																						pkc-1(nj1) SyGCaMP																										wt VGLUT-pH
Frame / Trial #	1	2	3	1	2	3	1	2	3	1	2	3	1	2	3	1	2	3	1	2	3	Frame / Trial #	1	2	3	1	2	3	1	2	3	1	2	3	1	2	3	1	1	2	3	1	2	3	1	2	3	Frame / Trial #	1
1	17.7237	9.38888	10.6069	14.1061	7.13654	5.16673	10.0686	7.78257	11.8056	3.57542	6.09703	9.50384	17.7213	14.5325	16.8257	4.89577	5.11989	4.27344	7.28925	5.37891	5.59549	1	22.533	11.9603	11.3327	16.9949	10.0996	10.0786	18.232	20.1134	9.65242	18.1931	14.5657	13.7315	9.28092	5.60618	5.73543	19.1177	21.4328	24.3177	13.8686	23.3084	21.2443	19.9881	13.1859	14.6282	10.4828	1	1.43086
2	16.5296	8.26907	10.3294	13.0018	5.4199	4.56262	8.45512	7.13338	10.8976	1.47705	5.08191	8.08553	17.1207	13.9406	16.7351	2.55515	4.2336	4.6993	5.43603	3.64373	3.87541	2	21.0295	11.3961	10.0423	16.5579	10.169	9.16784	16.1864	18.0106	10.111	18.0912	12.5305	11.8854	7.4027	5.57098	4.22443	17.4121	20.4884	22.5788	12.4903	22.5934	20.5696	17.9032	13.9555	14.4416	9.36713	2	1.64446
3	16.1047	7.25634	8.91512	12.2384	6.13535	4.46582	8.74072	7.37253	11.4777	1.89252	3.85823	7.6221	16.3639	12.9895	15.4787	2.16269	3.31693	3.99363	5.99353	3.82306	3.97984	3	20.7239	11.879	10.9351	15.9286	8.91118	8.5164	14.6644	16.6802	8.93597	17.0849	11.6834	11.7354	7.07981	4.20885	5.27674	17.2786	20.1654	22.1309	12.7372	23.7568	19.3758	17.7653	13.3542	12.9245	9.66714	3	1.8727
4	15.3	7.62156	8.49176	11.1254	4.84149	4.06411	10.1735	8.21913	9.99794	1.50859	5.32111	5.92401	16.7934	12.6832	15.2807	2.81666	1.92232	3.48607	5.0872	2.98961	4.987	4	19.5644	11.993	10.1439	14.6781	9.35101	6.83088	14.5111	16.1202	7.91741	15.3119	12.1991	12.6757	6.22536	3.32956	5.34401	17.291	19.9486	20.6267	11.2159	25.0131	16.6859	16.6785	13.3388	12.888	9.52847	4	1.7711
5	15.6765	7.56121	9.00107	10.7997	5.85825	4.21459	9.10687	8.81918	9.56207	1.17302	4.87846	5.52481	16.8555	11.2401	15.4416	3.67106	1.9142	4.97513	4.99797	3.19077	2.95981	5	19.3404	11.3073	9.78751	14.512	8.57819	6.98377	13.6295	15.3156	8.30185	15.0994	10.1592	11.2595	6.76205	3.83081	4.87154	16.0653	18.6615	19.4143	11.4256	25.0364	16.5227	17.7799	12.8369	12.0953	9.07923	5	1.7205
6	16.4032	7.10293	9.34289	11.1797	5.55002	4.6625	9.85396	7.05294	9.76429	0.747463	5.8574	3.96812	17.4272	11.6566	15.6201	3.2179	1.16673	5.46642	6.6335	3.45419	5.121	6	17.1744	10.4203	9.99918	14.4378	8.56045	6.37179	14.0095	14.661	11.1439	14.0179	8.74334	10.5912	6.26985	3.63519	5.18598	15.7348	18.2529	21.2137	13.0484	21.8563	15.9049	17.7195	12.4444	12.7152	9.14447	6	1.62017
7	16.7141	7.11267	8.95408	10.5875	5.43762	5.40917	9.76384	8.05216	9.37798	0.871935	6.2609	3.73791	17.8783	11.0106	15.2167	2.52384	1.8651	3.51282	5.77405	3.47045	4.57021	7	19.0121	10.5806	9.93221	13.2587	7.83883	6.18108	13.483	14.7423	10.5153	13.326	9.44045	10.555	6.00603	3.86441	3.60974	15.4399	18.4821	21.1378	14.0546	20.8526	14.8599	15.8394	12.3828	12.7228	9.09212	7	1.58194
8	16.1047	7.49853	8.55563	10.4396	5.40736	5.63444	9.46343	7.55298	10.3874	2.04727	5.88762	4.43155	16.6607	10.9537	14.8626	2.65708	1.87923	3.97411	6.78628	2.58637	4.33177	8	18.4283	12.1831	10.1962	11.8822	6.54919	6.29986	13.837	14.8146	9.44117	12.3081	9.18004	11.0611	5.94343	3.55158	3.97685	15.6457	18.4941	20.8685	14.151	21.4948	14.2777	17.5537	11.4904	13.1886	10.3043	8	1.72527
9	16.0272	7.12552	8.65122	9.25896	6.30048	4.53402	8.9632	8.55785	10.3382	0.749145	6.45498	4.58717	15.902	10.6631	15.8163	3.32899	1.89159	4.91729	4.47066	3.67393	3.38852	9	16.2502	12.0905	8.73151	10.7211	8.55803	6.17039	14.3454	15.7444	9.59184	11.915	8.18472	10.0351	6.70653	4.09603	4.39016	14.0452	18.9846	20.0954	15.6394	20.1388	13.5926	18.3445	10.3511	13.7839	9.3433	9	1.86406
10	14.6575	6.8588	7.79889	10.3687	6.38348	4.32987	8.43988	8.8931	10.4325	1.21213	4.47283	4.37249	16.4453	11.0197	15.2114	3.57638	2.05302	4.73906	5.4829	2.73038	3.82104	10	16.9365	10.8282	8.63953	11.4353	8.50038	5.80008	13.53	16.0056	9.31147	12.7626	8.48973	10.3106	6.76363	2.88912	4.35329	14.7397	17.8463	19.4993	14.8192	21.2073	13.014	19.7851	11.2487	13.129	9.03822	10	1.69338
11	13.599	6.89424	8.06881	9.28879	6.36057	3.99151	7.58743	9.26356	10.0829	1.66965	5.05637	4.61132	17.776	10.2398	14.9356	2.84949	2.77788	4.57169	4.44633	2.84978	3.81389	11	16.6126	11.3916	8.27547	11.2325	9.11114	5.26947	12.7784	17.1102	9.38797	13.4795	9.72719	10.8615	6.08046	1.48658	2.77948	15.2117	18.0944	19.074	13.916	20.1702	14.1542	19.7629	10.4391	13.058	8.73586	11	1.65373
12	13.3676	7.07568	7.13454	9.23534	7.53166	4.99689	7.6806	8.45697	8.77041	2.47451	6.05872	3.80387	16.8247	9.8756	14.8342	3.50995	1.73439	4.09232	3.98978	4.40145	3.79338	12	17.1206	11.3194	8.51523	10.4714	8.91925	6.98911	12.9514	17.5586	8.72084	12.6383	9.60655	10.3653	6.50178	1.78501	2.84877	14.42	18.0209	18.2771	12.721	20.2385	14.1574	19.0614	10.8778	13.3538	8.60109	12	2.14828
13	14.2363	6.51811	7.9455	8.35226	7.05873	5.04001	8.45077	8.90049	8.99078	1.01449	6.62225	4.50613	16.4137	10.678	14.1739	3.88752	2.87997	4.77015	4.2958	3.13224	2.61074	13	16.7319	11.5181	7.98915	10.4249	9.35947	6.23492	13.4967	18.4496	10.2609	11.7688	10.881	10.8753	6.61636	2.95352	2.87106	15.0766	16.7374	16.7504	11.5086	19.1491	14.0306	18.2323	9.64521	13.357	9.67456	13	1.78595
14	14.2296	4.8641	7.18234	8.31663	7.39333	5.13505	7.26569	8.27087	9.33594	1.41902	6.45115	4.25092	16.1352	11.3096	14.129	3.62296	3.27207	4.43106	4.69105	2.46697	2.41808	14	16.5679	10.6641	8.58065	10.611	9.26836	5.1844	13.1696	17.6548	10.676	9.51287	10.0288	11.0142	6.32144	2.94112	3.68754	15.0958	16.666	18.3809	11.2886	19.8468	14.6758	16.775	9.62818	12.2248	9.96715	14	2.03674
15	12.4776	4.9813	7.46671	7.62998	6.32512	4.83014	7.19386	7.05468	8.93458	1.1747	7.43946	4.55743	16.1437	10.6906	13.7548	3.57142	2.58783	4.35948	4.17817	2.22539	4.55924	15	16.5306	11.7503	7.19753	10.3355	9.09663	5.58307	12.7234	17.3179	10.3933	9.6264	10.5178	11.973	7.1247	2.77591	3.36176	15.9027	17.8817	18.2967	10.3523	20.4657	15.013	15.7097	9.71251	13.1473	8.5964	15	2.39215
16	13.2386	5.25658	7.18675	8.82882	7.20744	5.04969	7.07195	7.42254	9.18195	1.59858	7.61439	5.24848	15.6673	11.0304	14.1245	3.4462	2.33279	2.8415	3.29528	2.35547	3.26167	16	14.7452	12.2222	6.90313	11.2439	9.54008	4.67064	12.7487	17.2629	10.3708	11.0907	10.1078	11.4474	7.27276	2.6587	3.04813	15.0479	18.2353	17.812	9.99485	19.8967	15.076	16.7604	11.4697	12.4909	8.05889	16	1.94203
17	12.327	5.19779	7.72338	8.06219	6.80238	4.07159	6.62048	8.49828	10.4515	1.6276	8.69506	3.70946	16.2069	10.4023	13.8719	4.10017	2.35505	5.25168	3.78111	2.96639	4.35228	17	18.0308	11.4827	6.62604	11.8353	9.25143	5.05452	12.6039	17.848	10.9191	11.5499	9.33849	11.0823	5.9706	2.62349	3.11661	14.8201	17.3105	16.888	10.4253	18.9975	16.7468	16.9519	12.5401	12.5032	7.72294	17	1.68008
18	12.4582	5.68527	7.17671	8.07006	7.39678	4.79362	7.14727	8.20174	10.236	1.77604	8.93043	4.90964	15.5587	11.432	14.0968	3.66228	2.1265	5.04273	4.01682	0.950143	3.85109	18	17.8343	10.8941	7.00088	11.3757	10.2415	5.34839	14.0785	18.1233	11.0119	11.9481	9.92005	11.391	5.44178	2.42987	2.48531	14.8345	16.7912	17.8067	9.57782	18.9662	18.1715	18.163	12.2863	13.4424	7.1987	18	1.81392
19	12.734	5.39286	6.21713	6.86335	7.70155	4.41127	7.92571	7.73735	9.01866	0.889596	9.09643	3.30509	17.1226	11.1532	13.528	3.72222	2.74291	4.65122	4.00916	2.54827	3.68132	19	18.4162	11.6603	6.84194	11.4508	9.81099	4.07058	13.0043	16.8868	11.9466	12.9673	9.57384	12.1734	5.16694	2.09224	3.05745	15.6565	17.2881	18.3798	10.0691	19.4367	17.7187	17.4787	12.9309	12.7295	7.95224	19	1.69881
20	13.1958	6.42389	6.53164	6.86998	6.98524	3.65316	7.77116	7.4695	9.25806	0.956878	8.68995	4.22376	16.3074	10.617	13.9397	3.2912	1.84249	5.07165	3.68106	2.49485	3.10621	20	19.0629	11.5745	7.40535	11.6259	9.64893	4.39856	13.154	16.833	12.2565	13.7349	8.5645	11.741	5.21891	2.58149	3.22723	15.6661	17.3206	18.8672	8.24496	17.5116	17.6225	17.2031	13.2354	13.4924	6.95065	20	1.62683
21	11.945	5.45515	5.70983	5.8427	7.3086	4.04431	7.24175	7.17774	8.92175	1.41398	10.5755	4.15349	16.3572	11.1124	13.1971	3.0335	2.46738	5.01815	4.07631	3.76824	3.39567	21	18.0685	12.3611	7.65549	11.7349	9.45139	4.66283	12.7335	16.1685	12.1575	12.61	9.27945	11.6147	5.37366	2.01263	4.17176	15.165	17.3932	18.2467	9.73104	17.6833	17.0382	16.998	13.0907	12.9468	7.07448	21	1.31596
22	11.9863	6.55277	6.28662	5.86259	6.93293	3.86172	5.61869	5.84458	8.86422	0.887914	10.487	3.56418	16.352	12.2515	14.2481	3.28242	1.89971	5.53619	2.30377	2.8312	4.64889	22	18.4052	11.4281	8.00224	11.9773	9.84284	4.04016	11.8655	15.5611	11.4593	12.3347	8.85379	10.7206	6.29781	2.18825	4.66651	15.6553	17.7797	18.892	9.20383	17.9833	17.4798	16.1153	12.7541	12.9551	5.79007	22	1.59924
23	10.4288	6.22882	5.66766	6.6748	6.14183	2.8361	6.52339	5.86545	8.02566	1.59017	10.5031	3.75343	16.7533	11.784	13.8745	3.03159	1.44438	5.02972	4.44903	2.36662	4.72806	23	18.6603	12.4492	7.75632	10.6012	10.4794	4.38952	11.8166	13.5482	11.0247	12.994	9.68726	11.6052	5.83317	2.90392	5.18638	15.1861	18.334	18.5825	9.40879	18.0215	18.6038	15.5875	13.0903	13.0504	6.01703	23	1.50772
24	11.2141	6.28917	6.28461	7.34695	5.6395	3.01561	7.19386	6.23983	7.99734	0.662519	11.4791	3.67799	16.8466	11.1021	13.4991	2.92966	1.76901	6.01447	4.25884	2.0024	4.2612	24	18.6871	11.1293	8.37861	11.5308	9.8771	3.7167	11.7275	13.6825	10.3397	12.1829	8.30069	11.926	4.7468	2.86992	5.8031	15.6113	17.3756	18.414	9.47277	19.4982	16.7947	15.6079	13.1211	13.1144	7.06003	24	1.72975
25	12.4675	5.74834	5.68533	7.69462	4.31755	2.66362	7.31358	5.66978	6.94238	0.74494	10.7044	3.17576	15.5948	10.5045	12.1199	3.3477	1.35042	5.11359	2.40472	2.47301	4.19682	25	17.2988	11.1285	7.96414	11.3708	9.03414	4.18073	10.7183	12.7978	9.39729	11.4558	10.8466	10.9482	4.90469	4.18524	5.40195	14.713	18.629	15.7238	8.73466	18.6485	18.071	15.6647	12.5482	13.0369	6.72642	25	1.58312
26	8.96224	2.14597	2.63468	4.47271	2.76474	1.37049	2.99211	2.99825	3.80274	-0.897166	6.58693	1.42249	11.6136	7.69644	7.5905	1.66066	-2.39009	1.37377	1.95314	2.10553	2.86539	26	12.2326	8.08502	5.29526	7.34408	5.5873	0.843379	7.67071	9.07632	6.19212	6.8471	6.7527	6.47923	2.15626	2.12624	3.45333	9.57248	14.6672	10.9502	5.38851	15.1185	12.0807	10.4264	8.84324	10.1493	3.90485	26	1.37252
27	4.68624	-0.316746	0.360053	0.727426	0.185238	-1.37286	1.17271	0.665013	0.1936	-2.49512	3.87227	-1.33955	6.96885	4.0227	4.33471	-1.92988	-4.96312	-1.0299	1.4682	0.650959	0.790036	27	9.07586	5.26429	3.53962	3.12632	2.67745	-1.12492	3.08505	3.32472	0.982832	2.95574	2.66905	3.79164	0.821025	-0.215181	1.05818	4.98428	8.62165	6.32172	0.606438	8.83838	7.28919	4.46347	4.74543	5.47981	0.41724	27	1.65565
28	1.07625	-1.85005	-1.50729	-1.2542	-1.95592	-2.87411	-0.872218	-2.11783	-2.32652	-3.30881	0.701775	-2.66259	3.467	1.05182	1.29113	-3.35427	-7.40898	-3.87932	0.226109	-0.122554	1.09285	28	5.08644	2.13307	1.39951	0.0769685	-1.02095	-3.71095	-0.361018	0.761292	-2.28719	-0.680612	-0.55692	0.559548	-0.658718	-1.86614	-1.28186	1.09863	4.55355	2.06858	-2.14378	4.14626	3.27042	0.587148	1.73461	1.84363	-1.00077	28	1.57376
29	-1.20207	-4.25865	-3.42644	-3.1774	-2.37741	-4.58612	-2.65418	-2.33959	-3.37351	-3.96565	-1.09437	-4.09038	-0.181378	-1.17272	-0.72882	-4.77788	-7.85231	-5.30259	-0.376007	0.207757	-0.453173	29	1.78693	-0.462984	-0.783691	-2.8271	-2.28801	-5.26701	-4.32913	-3.21304	-4.4175	-4.17462	-4.37337	-2.81136	-2.55191	-2.27938	-2.56189	-2.88971	0.77441	-1.4475	-3.46557	1.44351	-0.791578	-2.74562	-1.18377	-0.286613	-3.69031	29	0.805218
30	-3.23814	-5.03659	-3.88354	-4.1475	-4.11999	-5.63946	-3.17575	-5.09895	-4.62936	-4.36935	-2.06863	-5.50783	-2.08962	-2.36679	-2.84495	-5.6529	-9.36525	-7.26052	-0.205197	-0.128594	-0.858515	30	-1.96276	-1.98682	-2.9415	-4.71622	-4.83182	-6.81731	-5.34032	-5.14542	-5.99019	-6.47917	-5.00973	-4.68414	-3.15318	-3.01745	-3.36986	-4.56498	-2.017	-3.92191	-5.10686	-1.552	-3.27431	-3.7223	-2.93448	-1.93036	-4.35088	30	1.57891
31	-4.77442	-5.43179	-5.68019	-6.52612	-4.22201	-5.5343	-3.94157	-5.0146	-5.40288	-4.07414	-3.75795	-5.93203	-4.18529	-3.59175	-4.8926	-6.27595	-9.45921	-7.56419	-0.485073	-0.755766	-1.24526	31	-2.44222	-3.1949	-4.1041	-6.08418	-5.34582	-7.18598	-7.69815	-7.05582	-7.87509	-7.91074	-7.27352	-5.64079	-3.86234	-3.87633	-4.49146	-5.97329	-4.43113	-6.4738	-7.18808	-4.38223	-5.30783	-5.06349	-4.86641	-4.7544	-5.62006	31	1.30254
32	-6.14186	-6.80624	-5.6834	-5.79844	-5.81631	-6.69808	-4.87064	-5.35158	-5.84583	-5.4589	-4.08994	-6.41356	-5.41853	-3.88655	-5.47122	-6.27213	-10.2554	-8.48242	-0.987136	-0.172728	-0.785553	32	-5.09939	-3.87872	-5.96404	-7.90678	-6.26538	-8.21431	-8.62588	-7.82587	-8.74414	-9.35651	-8.33893	-6.46207	-4.23404	-4.63641	-4.67785	-7.65975	-5.61753	-6.8788	-7.40884	-5.33931	-6.77722	-7.86164	-6.40142	-4.85805	-6.77244	32	1.68571
33	-6.55034	-6.86153	-5.86134	-6.72129	-5.09092	-5.91665	-4.46053	-6.156	-6.91981	-4.92695	-5.63752	-5.54964	-5.89085	-4.77095	-6.36161	-7.50639	-10.2289	-8.62269	-0.348064	-0.135098	-0.626278	33	-4.85344	-5.27046	-5.15356	-8.2908	-7.11076	-9.39225	-7.93651	-9.07106	-9.8823	-9.73924	-9.07979	-7.53254	-4.61717	-4.25317	-4.63369	-7.10386	-7.14588	-7.56134	-7.91276	-6.34425	-8.18142	-7.25448	-7.27515	-5.85526	-7.75841	33	1.31096
34	-6.90515	-7.01805	-6.21882	-7.28694	-5.39742	-7.11695	-4.50972	-5.76031	-6.826	-4.88195	-4.92417	-6.72136	-5.96225	-6.211	-6.70782	-7.95268	-10.1657	-8.29661	-0.610363	-0.577835	-0.837056	34	-7.4052	-5.50417	-6.43893	-8.73849	-7.98638	-8.90316	-9.28797	-9.19201	-9.80037	-9.8575	-9.00247	-8.10463	-5.07629	-4.67961	-4.82008	-8.00983	-8.00277	-8.49507	-9.13306	-7.20522	-8.28228	-9.65882	-7.37367	-7.07328	-8.2596	34	1.54101
35	-7.07622	-7.12201	-6.59157	-6.78594	-5.56558	-7.25951	-4.82101	-6.98041	-6.8229	-5.13889	-5.45748	-6.46055	-6.37395	-5.87616	-7.44401	-7.65452	-10.3169	-8.98637	-0.961898	-1.81824	-1.58908	35	-8.6562	-5.71192	-6.21457	-9.16292	-8.21416	-9.13578	-9.83569	-9.52068	-10.7385	-10.7803	-10.4765	-8.42667	-5.30034	-4.92844	-4.70176	-8.64684	-8.3379	-8.51613	-9.36724	-8.41967	-8.94331	-10.7541	-7.97089	-7.07089	-8.07131	35	1.40618
36	-7.27934	-7.38405	-6.58996	-7.1303	-5.50463	-7.08615	-5.24941	-6.52516	-7.08399	-6.0821	-6.39599	-6.75542	-6.65808	-6.82997	-8.4145	-7.71904	-10.8761	-9.86303	-0.975418	-0.151822	-0.954843	36	-9.07417	-6.76607	-6.68408	-9.57429	-8.38791	-10.4621	-10.1053	-10.372	-10.024	-11.4022	-10.6223	-9.2639	-5.39366	-4.42079	-5.3594	-8.33473	-9.22208	-9.09187	-9.92803	-8.01512	-9.58237	-9.33505	-9.19695	-7.66382	-8.48578	36	1.16874
37	-7.69267	-7.97199	-6.5996	-6.638	-5.93519	-7.34486	-5.47189	-6.95172	-7.38136	-6.84196	-6.77054	-6.8632	-7.30891	-6.0024	-7.95564	-7.38079	-10.9414	-9.40174	-1.05609	-1.01221	-2.11221	37	-9.06941	-6.6908	-7.11587	-9.69835	-9.16597	-9.0618	-10.1234	-11.2387	-10.9576	-11.3768	-10.3703	-9.03714	-5.51809	-4.71241	-5.80472	-9.10642	-9.40831	-9.363	-9.61999	-8.19729	-9.83741	-10.6759	-8.48661	-7.28495	-8.66039	37	1.56343
38	-7.32295	-7.64025	-6.61366	-7.89693	-6.50928	-7.24323	-5.69741	-7.78657	-6.73263	-5.67924	-5.70307	-7.196	-7.78681	-6.71365	-8.59602	-7.35559	-11.0396	-9.79	-0.249815	-0.438928	-1.87759	38	-9.18288	-6.83946	-6.99657	-9.93995	-8.61044	-10.0449	-10.7618	-9.95302	-11.21	-11.2418	-10.5279	-8.9341	-5.52715	-5.32127	-5.40519	-9.19634	-10.0766	-9.454	-9.74044	-8.45345	-10.0892	-10.9303	-9.65794	-7.46326	-8.40257	38	1.45614
39	-7.35537	-7.891	-7.15952	-8.00923	-6.56764	-6.85295	-4.51974	-6.52733	-6.54456	-5.75283	-6.84588	-7.04296	-7.67301	-6.70488	-8.49235	-7.65337	-9.94705	-9.59587	-1.37878	-0.861224	-1.41121	39	-9.11919	-6.88386	-6.74835	-8.94744	-10.3528	-9.72763	-10.0403	-10.6728	-11.1711	-11.2039	-10.5178	-9.08456	-5.69331	-5.88973	-5.07981	-8.92459	-9.56804	-9.46792	-9.90276	-7.70467	-10.0683	-10.5562	-9.07248	-8.55658	-8.96665	39	1.57687
40	-8.62256	-7.66206	-6.80806	-7.64042	-5.77654	-7.26523	-4.99734	-6.5456	-7.14328	-6.05308	-5.45918	-7.28912	-7.27582	-7.03019	-8.96318	-7.41248	-11.3621	-10.3532	-0.672558	-0.316281	-1.58098	40	-9.56571	-7.58086	-7.36986	-10.0661	-8.93497	-9.44732	-10.9773	-10.5224	-11.0484	-11.3003	-10.522	-8.77804	-4.95817	-5.15086	-5.88536	-9.41494	-9.98144	-9.64353	-10.285	-7.96204	-9.87848	-11.3302	-10.2584	-9.25475	-9.17056	40	1.48877
41	-7.78324	-7.51644	-6.77593	-7.0727	-6.18031	-7.4179	-5.60859	-6.08469	-6.93973	-6.04131	-5.75414	-7.10202	-8.46405	-7.18083	-8.59714	-7.09561	-11.4907	-9.78783	-0.564844	-0.657741	-1.30487	41	-9.7392	-7.56393	-7.50148	-9.46329	-10.402	-9.70215	-10.6495	-10.5216	-11.3191	-10.7025	-10.5955	-9.42256	-4.91879	-5.29727	-5.52473	-9.0245	-10.1649	-10.1482	-10.7668	-8.90988	-10.6072	-11.5957	-9.54198	-7.99781	-8.65609	41	1.42216
42	-7.98897	-7.70333	-7.45073	-7.02587	-5.77481	-7.93533	-5.78884	-6.67126	-7.15523	-5.69186	-6.27256	-6.79163	-8.10107	-6.8334	-8.91976	-7.24908	-10.8312	-10.5065	-0.696895	-0.531378	-0.39404	42	-9.50056	-7.01032	-7.88286	-9.8167	-10.2379	-10.2739	-10.6362	-10.985	-11.3055	-11.5011	-10.4039	-10.1688	-5.41689	-5.03845	-5.31888	-9.16877	-9.97461	-9.34457	-10.334	-9.24847	-11.3861	-10.6119	-9.31331	-7.73848	-8.85024	42	0.966873
43	-7.19101	-7.16328	-6.85546	-7.31802	-5.35592	-7.85789	-4.82014	-6.66169	-7.02823	-5.53122	-6.59944	-7.48268	-7.89541	-7.07939	-8.85651	-8.13555	-12.134	-9.85435	-1.04257	-1.05774	-1.70067	43	-9.49398	-6.90532	-7.92442	-10.7166	-9.85493	-10.0396	-10.1459	-11.2265	-11.3237	-11.9771	-10.7884	-9.26175	-4.9373	-5.69491	-5.91737	-9.33741	-10.3447	-9.5969	-10.2594	-8.86484	-11.7463	-11.263	-9.88215	-8.35682	-8.82993	43	1.05037
44	-8.56218	-7.61494	-7.24427	-7.67481	-6.04067	-7.62602	-5.76184	-6.41211	-7.50349	-5.33106	-5.48344	-6.66834	-7.3316	-7.14574	-8.80262	-7.43462	-11.8033	-9.72132	-1.13676	-0.901642	-1.53615	44	-9.44566	-7.09311	-7.90633	-9.98688	-9.69529	-9.70132	-10.4384	-11.766	-10.8515	-11.4804	-10.5356	-9.30659	-4.59945	-5.34328	-5.9976	-9.00851	-10.6204	-10.1625	-10.5773	-8.05011	-10.5453	-11.1283	-8.88922	-8.41321	-8.98657	44	1.08743
45	-8.71313	-8.25622	-6.99444	-8.07015	-5.26168	-7.15523	-5.27379	-6.76996	-7.43225	-5.64098	-6.50495	-7.57494	-7.8002	-7.59424	-8.62446	-7.72095	-10.7355	-9.50694	-0.629743	-0.891886	-1.6177	45	-10.2446	-7.60909	-7.346	-11.0745	-9.71544	-10.0614	-9.89468	-10.4513	-10.6419	-11.7849	-10.9183	-8.85693	-5.73348	-5.5641	-5.34927	-9.37538	-10.274	-9.06065	-10.1587	-8.86363	-9.79382	-11.2126	-10.0743	-8.39733	-8.82329	45	1.13382
46	-7.68484	-8.24532	-7.11614	-7.1216	-5.80378	-7.4707	-5.49801	-5.98207	-7.1809	-5.73559	-6.62072	-6.805	-7.72545	-6.87421	-8.68397	-7.56442	-10.1576	-10.2459	-0.654981	-0.825452	-1.70449	46	-10.0075	-7.23951	-7.37756	-9.38534	-8.44233	-10.3844	-10.5459	-10.3237	-10.9661	-11.5918	-10.4731	-9.86704	-5.25348	-5.65411	-5.53324	-9.00651	-10.7894	-9.87932	-10.2424	-9.23681	-10.742	-11.9542	-9.54604	-8.60662	-8.65688	46	1.09949
47	-7.39041	-8.31112	-6.76629	-7.81239	-5.57898	-7.04303	-5.68914	-6.4782	-7.42826	-5.47319	-6.15551	-6.88992	-7.98541	-6.48178	-9.3236	-8.3627	-11.1622	-9.77482	-1.64198	-0.293517	-1.79986	47	-9.59573	-7.44989	-7.84745	-9.60775	-9.06478	-9.92162	-10.7145	-10.7333	-10.7692	-11.2259	-10.9765	-9.65579	-5.15032	-5.17086	-5.0243	-9.10482	-10.1829	-9.87669	-10.4454	-7.8981	-10.7693	-11.9338	-8.71569	-7.6241	-9.77918	47	1.24181
48	-7.23499	-7.56588	-6.93539	-7.52688	-5.42682	-6.464	-4.71957	-7.00824	-6.88884	-5.55015	-6.61349	-6.76146	-8.02446	-7.5664	-9.56651	-7.3491	-11.164	-10.1848	-1.68435	-0.812908	-2.10077	48	-9.89951	-7.06188	-7.62309	-10.5182	-9.17846	-10.2036	-10.3012	-10.0477	-11.0911	-10.8285	-11.0135	-8.5974	-5.25545	-5.68131	-5.4133	-10.0679	-10.5481	-9.13586	-9.9458	-8.84513	-11.117	-12.5645	-8.69623	-8.19677	-8.68969	48	1.16649
49	-7.76535	-6.93745	-7.19768	-7.17796	-5.65161	-7.3431	-4.93334	-6.10295	-6.6667	-5.9181	-6.74628	-7.37663	-7.58933	-7.9348	-8.43321	-7.67819	-10.088	-9.41223	-1.41348	-0.994092	-1.15751	49	-10.7999	-8.10587	-7.57345	-9.25434	-8.62374	-10.2319	-10.2871	-10.7466	-10.6492	-11.7139	-10.2994	-9.69114	-5.46533	-5.78412	-6.02556	-9.25908	-9.48296	-9.09713	-10.2341	-8.24112	-10.9628	-11.3874	-9.89958	-8.99939	-8.37249	49	1.25077
50	-8.16712	-6.97873	-7.44631	-6.55719	-6.0316	-7.25203	-5.14449	-6.46602	-7.22028	-6.16368	-6.61263	-6.29716	-7.82809	-7.59691	-8.72327	-8.08134	-11.8503	-9.94545	-0.892943	-1.16459	-1.74359	50	-9.43542	-7.77543	-7.20708	-10.2122	-8.96238	-10.0244	-10.1194	-11.38	-10.6803	-11.4594	-10.5101	-9.48076	-5.24994	-5.17406	-5.08873	-9.10842	-10.0352	-9.37353	-10.272	-8.49407	-10.6483	-11.0961	-9.61902	-9.77777	-9.49284	50	1.19947
51	-7.19586	-7.29917	-6.73054	-7.16925	-4.97853	-7.11387	-4.87413	-7.29305	-6.47022	-5.59724	-6.50282	-6.89941	-7.17131	-7.75632	-8.72439	-7.91603	-10.4536	-9.04674	-0.152918	-0.33858	-0.976303	51	-10.0064	-7.35317	-7.54189	-10.1999	-9.01842	-9.59241	-9.78233	-10.3155	-10.6566	-11.603	-10.505	-9.37384	-5.20072	-5.46129	-4.44041	-8.89502	-10.0461	-9.52583	-10.1705	-8.98306	-10.7135	-11.7884	-9.66848	-8.57842	-9.51628	51	0.0964683
52	-7.45265	-7.57406	-6.63454	-6.89161	-5.71991	-6.82171	-5.13361	-5.54073	-6.368	-4.86934	-5.93631	-7.29602	-7.59193	-6.79488	-8.24233	-7.80188	-11.1152	-10.0687	-0.501297	0.726219	-0.361136	52	-9.18214	-6.88085	-6.68716	-10.3489	-9.66505	-10.2545	-9.69324	-10.5	-10.7583	-11.0521	-10.3257	-8.47237	-5.45981	-5.10165	-5.032	-9.14838	-10.2371	-9.32615	-10.3569	-8.83709	-11.14	-12.2801	-9.5436	-8.5681	-9.43229	52	0.404176
53	-8.28266	-7.31981	-7.17599	-6.27914	-5.72078	-6.28448	-4.82145	-6.75083	-6.44146	-5.4488	-6.46664	-6.74206	-7.91623	-7.56411	-8.95682	-7.43691	-9.29566	-9.81784	-0.966855	-0.651702	-1.61865	53	-10.2684	-7.05285	-8.00909	-10.1187	-9.61143	-10.1411	-9.5849	-10.5318	-9.98598	-11.4267	-10.5229	-9.92179	-5.78151	-5.05445	-5.36346	-8.477	-10.1669	-9.87405	-10.4556	-8.96215	-10.5647	-12.0549	-10.241	-8.26746	-9.34127	53	0.967045
54	-8.39037	-7.78432	-7.27118	-7.53019	-4.93746	-6.62592	-5.39396	-6.43124	-7.29108	-5.57201	-6.6718	-6.86664	-7.48185	-6.8887	-8.03948	-6.97306	-10.4822	-10.2491	-0.250716	-0.647056	-2.1971	54	-10.6187	-6.91924	-6.86418	-10.122	-9.34657	-10.1218	-9.40554	-10.568	-10.7987	-10.5081	-10.3788	-9.22209	-5.0885	-5.5517	-5.99517	-9.11641	-9.94291	-9.11819	-8.92573	-8.21338	-10.4574	-11.8859	-9.2602	-8.83616	-8.53539	54	1.19278
55	-6.98491	-7.55576	-6.52891	-7.2857	-6.53046	-7.20803	-4.28986	-5.71422	-6.51314	-5.13636	-6.77565	-6.35536	-7.6797	-7.05574	-8.35461	-7.37201	-10.0657	-9.81133	-0.398541	-0.239626	-1.68732	55	-9.47787	-7.66592	-7.16205	-10.5097	-8.52014	-10.5365	-9.73538	-11.4213	-10.3188	-11.6095	-10.8372	-9.34927	-5.16843	-4.81562	-5.50041	-8.05099	-9.55962	-8.29351	-10.4039	-8.24917	-10.3727	-12.2712	-9.65024	-8.03117	-8.1178	55	1.01222
56	-7.6513	-8.42443	-6.79119	-7.34123	-4.63831	-7.29602	-5.36348	-6.08208	-6.97911	-5.0981	-6.82289	-6.79767	-7.17354	-7.07595	-7.94441	-7.66024	-10.627	-9.68806	-0.322826	-0.964359	-1.62676	56	-9.17299	-7.47661	-6.66637	-10.1191	-9.44857	-9.93066	-10.2542	-10.2982	-10.6232	-11.5342	-10.2709	-8.36158	-5.81223	-4.98044	-5.20138	-8.87463	-10.2134	-9.01327	-10.0852	-8.30024	-10.7708	-11.6797	-8.74083	-8.1793	-8.61117	56	0.844046
57	-7.19735	-7.42065	-6.89322	-7.38474	-4.61626	-6.74692	-4.93508	-4.5876	-6.75254	-4.92358	-5.91205	-7.00373	-7.3197	-7.4291	-8.24084	-8.28329	-9.94705	-9.17001	-0.860944	-0.71349	-1.20616	57	-9.20044	-7.51274	-7.23402	-9.69917	-9.65336	-9.69146	-9.75063	-11.3694	-10.1906	-11.2332	-10.5539	-9.04015	-5.04952	-5.42928	-5.58186	-9.14758	-10.1352	-9.04373	-10.2088	-7.75333	-11.1537	-11.6797	-10.3581	-8.29129	-8.29085	57	1.41127
58	-7.58943	-7.66907	-6.7454	-7.18459	-5.53013	-6.39404	-5.21067	-6.72996	-6.14187	-5.61659	-6.19297	-6.84983	-6.79866	-7.27999	-8.93773	-7.32352	-11.0396	-9.46175	-0.242153	-0.52859	-0.368289	58	-10.5041	-7.89587	-7.39295	-9.45186	-9.35584	-10.042	-10.832	-10.1961	-10.6446	-11.3209	-10.443	-8.47453	-5.24325	-5.6509	-5.4603	-8.74236	-9.72738	-9.944	-10.5113	-7.9922	-10.3317	-12.3966	-9.83309	-8.70987	-8.19553	58	1.38199
59	-6.85111	-7.525	-6.34615	-7.01137	-5.4346	-6.10717	-5.27641	-6.41602	-6.65165	-5.29069	-6.44834	-6.74551	-7.60309	-6.35135	-8.42835	-6.69742	-9.91667	-9.69131	-0.780272	0.232844	-1.94722	59	-9.27072	-7.18381	-5.60229	-9.51756	-9.20185	-9.75763	-10.9773	-10.0732	-10.4391	-11.8576	-10.0105	-8.52324	-5.49604	-5.80852	-5.05996	-9.42413	-9.65193	-9.74958	-10.0844	-8.09997	-10.4642	-11.9217	-8.81665	-8.04427	-8.72446	59	1.43583
60	-6.47543	-7.08035	-6.23489	-7.09383	-5.49036	-5.73714	-4.00078	-5.66813	-6.27419	-5.39203	-6.42749	-7.65814	-7.4309	-5.89103	-7.9897	-7.36895	-11.36	-10.3619	-0.630644	-0.0514746	-1.15418	60	-10.465	-6.62268	-6.5921	-9.69346	-9.31553	-9.89984	-10.2422	-9.42408	-10.8729	-10.5851	-9.65625	-9.21734	-5.67087	-5.43848	-5.38047	-8.29756	-9.98666	-8.3627	-10.3889	-8.14381	-10.5179	-11.5453	-9.10613	-8.8445	-8.62836	60	1.91658
61	-7.13101	-7.27893	-6.20878	-6.75279	-5.54008	-6.6708	-4.8258	-5.62508	-6.5273	-5.73391	-6.18573	-6.86923	-6.38213	-7.12248	-8.20229	-7.46402	-9.65527	-9.89412	-0.984432	-0.670285	-1.63391	61	-9.02586	-6.68779	-6.64405	-9.61755	-9.35383	-9.1962	-10.1214	-9.52971	-10.0369	-9.86782	-10.3988	-8.72932	-4.981	-5.37528	-5.11588	-8.65244	-9.52831	-8.99033	-9.9383	-8.16472	-10.2275	-11.1744	-9.31858	-8.90924	-7.94592	61	1.19913
62	-6.95025	-6.77159	-6.54417	-6.16932	-5.4186	-6.53	-5.10139	-5.48681	-6.13789	-6.23895	-5.60645	-6.97528	-7.32416	-6.90319	-8.28687	-6.97077	-9.68988	-9.47549	-0.554027	-0.299092	-1.33968	62	-9.34941	-6.65467	-6.59633	-9.24413	-8.79871	-9.04454	-10.2037	-9.85446	-10.622	-11.0014	-10.1681	-8.81985	-5.3409	-6.19936	-5.66047	-7.99664	-9.44322	-9.21484	-9.34039	-7.82773	-10.0067	-11.1944	-8.57662	-8.23728	-8.00607	62	1.2087
63	-6.78328	-6.9577	-5.91155	-7.51361	-6.13189	-6.16965	-5.23766	-5.6703	-5.53607	-5.65654	-5.59028	-6.4709	-6.7518	-6.38148	-8.3999	-7.11126	-9.65915	-10.0904	0.0057237	-0.213146	-1.24717	63	-9.74139	-6.49547	-6.51513	-8.95642	-8.21335	-9.15839	-10.2703	-10.5479	-10.1421	-9.84589	-10.3754	-8.77804	-5.24443	-5.33927	-5.34806	-7.76565	-10.04	-7.94529	-10.1851	-8.34769	-10.5672	-11.6608	-9.07451	-8.74403	-8.13498	63	1.24784
64	-7.30357	-6.94836	-6.31522	-6.00937	-5.14842	-6.37204	-5.78361	-5.44072	-6.44854	-5.32517	-6.05293	-6.30579	-6.96304	-6.71022	-7.8239	-7.05094	-9.56943	-9.92521	-0.458933	-0.962501	-1.76839	64	-9.10162	-6.30391	-7.36563	-9.17149	-7.90777	-9.02235	-9.77831	-9.80459	-10.5685	-9.75816	-9.66729	-8.53876	-5.01644	-5.43968	-5.0786	-8.45822	-9.23291	-8.45296	-10.0185	-8.26324	-10.2492	-12.1121	-8.79597	-8.18129	-7.9049	64	1.48218
65	-6.72998	-6.99197	-5.80551	-6.06697	-4.83414	-6.31264	-5.13099	-6.38036	-5.49713	-5.85292	-6.30959	-6.29544	-6.90019	-6.10842	-8.44182	-7.28726	-9.44685	-9.33197	-1.40763	0.192426	-1.55141	65	-8.75319	-6.84171	-6.56401	-8.47853	-7.64694	-8.08814	-10.1274	-9.61532	-10.3095	-10.2854	-10.1393	-8.51333	-5.05267	-4.544	-5.40438	-8.53255	-9.63306	-8.83427	-9.49757	-8.23992	-9.71061	-11.7458	-8.52838	-7.92553	-7.6838	65	1.06944
66	-6.26448	-7.13564	-6.13206	-6.04252	-5.50895	-6.69104	-4.00426	-5.69205	-5.8715	-4.59684	-5.46429	-7.33568	-6.91061	-6.29834	-8.1832	-7.5083	-10.3656	-9.64938	-0.756836	-0.0928215	-0.948644	66	-8.89593	-6.82817	-7.57922	-9.49797	-8.92408	-8.30227	-10.0544	-9.17316	-9.70872	-9.6713	-9.19533	-8.8621	-4.70143	-4.90523	-5.25689	-7.40438	-9.33967	-8.18822	-9.67449	-8.20533	-10.8792	-11.7469	-8.91517	-8.3874	-7.37715	66	1.17628
67	-6.11763	-7.4627	-6.12925	-5.61279	-5.47437	-5.86781	-4.00252	-5.69683	-6.02903	-4.8912	-5.62135	-6.38511	-7.05379	-6.32618	-7.85833	-6.96886	-8.80359	-9.62154	-0.624785	-0.200602	-1.56238	67	-9.51154	-6.81951	-7.62732	-8.62586	-7.84327	-8.73177	-10.2879	-9.17905	-10.1145	-10.1486	-8.82873	-8.63922	-4.855	-4.6112	-5.38655	-8.48979	-9.53032	-8.97454	-9.32854	-7.41031	-10.5316	-11.9888	-9.87647	-8.00456	-7.52481	67	1.2261
68	-6.61668	-6.09799	-5.2978	-5.68365	-5.07666	-5.91357	-4.90939	-5.17678	-6.1109	-5.26798	-5.41705	-6.70153	-7.41602	-6.63547	-7.78048	-7.3365	-9.62877	-9.7365	-0.0713435	-0.00734024	-1.67492	68	-8.47027	-7.37914	-6.10297	-9.16129	-7.71467	-8.44119	-9.87783	-9.50537	-10.1487	-10.1439	-8.91624	-8.37451	-5.41059	-4.85123	-5.45706	-7.76725	-9.04869	-8.3627	-9.85773	-7.94555	-10.0925	-10.2896	-9.11992	-8.21901	-8.77602	68	1.28871
69	-6.81831	-7.03168	-6.60964	-7.00598	-5.02089	-6.23609	-4.45312	-5.19809	-5.48341	-4.75622	-5.85076	-6.96192	-6.97197	-6.36546	-7.58848	-6.92343	-8.6139	-8.86418	-1.61539	-0.842641	-1.39881	69	-8.31289	-7.30161	-6.68946	-9.39309	-8.40726	-10.4366	-10.0315	-9.8737	-10.2438	-9.98092	-8.98633	-8.58446	-4.74554	-5.15166	-5.1175	-7.68053	-9.48416	-9.1588	-10.0422	-7.66285	-10.7067	-11.6976	-8.8284	-7.31553	-8.97017	69	0.867402
70	-6.23541	-6.62012	-6.58434	-6.9749	-4.91195	-6.24621	-3.61939	-5.67204	-5.9485	-5.16327	-6.18275	-6.34933	-6.46172	-6.58208	-7.83737	-6.64207	-9.91667	-9.36306	0.0620594	-0.098861	-1.16324	70	-8.99548	-6.70171	-6.78067	-8.64504	-8.66728	-8.52092	-9.33491	-9.28861	-10.3494	-10.1452	-9.06152	-8.33916	-4.13639	-5.12965	-5.06928	-7.76005	-9.00976	-7.91407	-9.29103	-7.95279	-9.0748	-12.1557	-8.86976	-8.54506	-8.84946	70	0.780665
71	-6.15751	-5.93641	-6.02883	-6.20828	-4.835	-6.24181	-5.22068	-5.55595	-6.07063	-4.79659	-5.95334	-6.68903	-6.47622	-5.8365	-7.83962	-6.22097	-8.90391	-8.50267	-0.532395	-0.671214	-1.54426	71	-7.94945	-7.07505	-6.59787	-8.79359	-7.94889	-8.28049	-9.83248	-9.41937	-9.43341	-9.80332	-9.13289	-8.16714	-5.44052	-3.63391	-5.04942	-6.85768	-9.25178	-8.72371	-10.0927	-8.31994	-10.2182	-12.2061	-8.58554	-8.21743	-8.56625	71	1.28466
72	-5.72928	-7.06205	-6.01718	-6.77475	-4.52116	-5.67334	-4.69737	-5.85249	-5.84937	-4.03588	-5.70605	-6.23983	-6.31853	-6.69191	-8.09187	-7.18532	-10.0166	-9.42416	-0.609462	0.0121718	-0.452219	72	-7.98349	-6.41795	-6.08372	-8.09777	-8.54957	-8.55791	-9.57006	-8.86765	-10.0869	-10.2127	-9.36823	-8.09601	-4.65812	-4.81282	-5.45544	-7.96467	-8.9921	-8.14196	-9.42411	-7.1252	-11.4178	-11.8577	-8.57176	-8.43665	-8.94321	72	1.157
73	-6.24174	-6.64582	-6.5996	-6.27168	-5.13588	-6.07681	-4.80403	-5.43594	-5.25508	-4.56026	-6.09635	-6.5084	-6.19804	-5.986	-7.71349	-6.83486	-8.97103	-8.90828	-0.343107	-0.425455	-1.01207	73	-8.91679	-7.6328	-6.4678	-8.45731	-8.2585	-9.26772	-9.47536	-9.01334	-9.3969	-9.2847	-8.70893	-8.03005	-5.02156	-5.12965	-4.95339	-7.65215	-8.63972	-8.74665	-10.2282	-7.6709	-10.1944	-11.2966	-8.57824	-8.9843	-8.20842	73	0.815761
74	-6.03005	-6.48424	-5.31025	-6.45152	-4.74465	-5.88761	-5.51673	-5.82553	-5.59316	-3.98458	-6.41131	-6.42218	-6.16531	-6.09087	-7.99531	-6.5409	-8.85481	-8.85225	-1.34633	-0.432888	-1.05928	74	-8.69463	-6.95989	-6.62827	-8.29856	-8.73662	-7.99936	-8.58856	-9.36047	-9.99064	-9.89233	-9.30833	-8.02961	-5.07275	-5.74411	-5.18193	-6.78055	-8.96842	-8.16114	-9.46203	-7.14249	-10.002	-10.8228	-8.67352	-7.77382	-8.16506	74	1.21865
75	-5.70282	-6.30163	-5.94288	-5.33515	-5.19467	-5.23422	-4.16665	-5.33115	-5.65422	-4.51821	-6.7948	-5.91392	-7.30668	-6.13626	-7.74979	-6.59014	-8.47896	-8.122	-0.217816	-0.0686638	-1.07835	75	-7.96592	-6.58053	-6.29731	-7.79332	-8.17868	-8.21431	-8.48624	-9.35222	-9.42409	-9.16601	-9.78624	-7.78819	-4.33996	-5.14246	-5.36913	-7.61419	-9.01899	-8.12692	-9.87906	-7.16581	-9.68755	-10.1841	-9.20425	-8.03435	-7.8838	75	1.08236
76	-5.9775	-6.61117	-5.78542	-5.75824	-4.64004	-6.93391	-4.95336	-4.47107	-4.70901	-5.85628	-6.10656	-6.27992	-6.72131	-5.84641	-7.49491	-5.92701	-8.97103	-8.94696	0.59522	-0.556465	0.143396	76	-8.35864	-6.91849	-6.69524	-8.46629	-8.01178	-8.51229	-8.01475	-9.2085	-9.18799	-10.0721	-9.97995	-7.82656	-4.86996	-4.83603	-5.27066	-6.93481	-8.57189	-8.22244	-8.88544	-7.20965	-9.93792	-11.3895	-8.29606	-8.11894	-8.00217	76	0.647709
77	-5.6074	-6.53524	-5.828	-5.9037	-4.28469	-4.94735	-4.34385	-4.79458	-4.92673	-4.42359	-6.01761	-6.81189	-6.62573	-5.67518	-7.23741	-6.17173	-8.90568	-8.27962	-0.0965819	0.0957948	-1.08026	77	-8.24701	-6.29601	-5.97789	-8.22469	-7.89366	-8.45146	-8.63792	-9.01923	-9.18644	-9.54401	-8.36017	-7.95115	-4.46045	-4.64761	-4.56359	-7.56423	-8.43824	-8.13482	-9.75821	-7.70025	-9.70593	-10.276	-7.66275	-8.98191	-7.61856	77	0.94168
78	-5.54777	-6.09955	-5.24157	-5.93809	-4.37591	-6.08077	-4.19713	-4.82241	-5.19312	-4.35757	-6.32576	-5.7113	-6.15787	-5.96006	-7.27222	-6.25839	-8.14832	-9.31136	0.269825	0.0460856	-1.60959	78	-8.6917	-6.18649	-6.85841	-8.55199	-7.886	-7.93689	-8.40719	-8.89239	-9.81978	-8.43237	-8.31131	-7.99469	-4.85303	-4.34078	-4.7046	-6.88126	-9.08682	-8.27847	-9.47308	-7.17386	-9.91306	-10.4372	-8.54662	-8.40646	-7.64473	78	0.873075
79	-6.50822	-6.11279	-5.34078	-5.99362	-4.94913	-5.15635	-4.14358	-6.30166	-5.37278	-5.02156	-5.64561	-6.09455	-5.6439	-6.00964	-7.31264	-6.7795	-7.85831	-8.44483	-1.10161	-1.01825	-1.0383	79	-7.99923	-6.26026	-6.27153	-7.96473	-8.62213	-8.17938	-8.73302	-8.79461	-8.87384	-9.00776	-8.87503	-8.13998	-4.80145	-4.71481	-5.08873	-7.08347	-8.44466	-7.25373	-8.98101	-6.71261	-8.44331	-11.9417	-7.88656	-7.88582	-7.32676	79	0.998377
80	-6.10198	-5.89202	-5.58459	-6.34585	-4.52678	-5.49558	-3.7056	-4.60369	-6.32906	-5.08632	-5.15869	-5.54619	-6.9028	-6.39788	-7.3714	-7.29871	-8.06673	-7.95245	-0.0159092	0.528776	-0.404055	80	-7.16291	-6.53913	-6.43816	-7.3591	-7.7195	-7.4108	-7.89156	-9.04946	-9.10877	-9.18794	-9.03178	-7.69334	-4.66206	-3.71312	-4.82656	-7.12584	-8.08143	-7.13452	-9.2539	-6.94786	-9.22105	-9.66204	-8.52067	-8.80558	-7.32285	80	1.06491
81	-5.81612	-5.73783	-5.48659	-5.28708	-4.41049	-5.40098	-4.09961	-4.80545	-5.12852	-5.22467	-5.14762	-5.72553	-5.58849	-5.73811	-7.87031	-6.77263	-10.8047	-8.71849	-0.705458	0.257001	-1.26243	81	-8.65327	-5.88127	-6.20072	-8.31815	-7.81344	-7.15721	-8.18368	-8.2429	-9.56194	-9.3234	-8.45023	-8.29648	-3.73476	-4.27157	-4.22565	-6.69143	-8.27208	-7.88587	-9.03235	-7.0118	-8.91701	-10.5326	-8.38201	-7.45056	-8.44828	81	1.15189
82	-5.81612	-5.54237	-5.16686	-6.38274	-3.94188	-5.20651	-3.91109	-5.92554	-5.22897	-4.73603	-5.72903	-6.2894	-5.75473	-5.63132	-6.78978	-6.86082	-8.92405	-8.50484	-0.49679	-0.687474	-0.549501	82	-8.16539	-6.55155	-6.04101	-7.72313	-8.08031	-8.31706	-8.61986	-8.24604	-8.95616	-8.60783	-8.33723	-7.27731	-4.22026	-4.21117	-4.61019	-6.65547	-8.23274	-7.78509	-8.67456	-6.35792	-8.59424	-10.1795	-8.02522	-7.23173	-8.10061	82	0.983676
83	-5.19557	-6.04776	-5.2259	-5.07615	-4.92622	-5.10003	-4.55979	-5.5616	-5.61042	-5.02661	-5.08804	-5.44877	-5.50295	-5.44445	-6.92639	-6.43744	-8.35639	-8.24853	-0.323727	-0.667497	-0.961043	83	-8.31289	-6.01412	-6.62904	-8.17164	-7.36434	-7.10337	-8.69088	-8.58178	-8.95344	-8.70587	-8.21573	-7.49675	-4.48959	-3.82233	-4.98216	-7.53186	-8.1898	-7.00403	-9.33763	-6.83687	-8.91557	-10.0687	-8.13793	-7.50536	-7.20956	83	0.927946
84	-5.56417	-6.0867	-5.20984	-4.65181	-4.86483	-5.35786	-4.42439	-4.98851	-4.49218	-4.04681	-5.49579	-5.52723	-5.87671	-5.75832	-7.01734	-6.06063	-8.60754	-8.82658	-0.738358	-0.874697	-0.599573	84	-8.03766	-6.10896	-5.90362	-6.85509	-7.62839	-7.86578	-8.00793	-8.49971	-8.1737	-8.93207	-7.70767	-6.96691	-5.05936	-3.89154	-4.98581	-6.56315	-7.81052	-7.57826	-8.83529	-6.89678	-8.88711	-9.68098	-8.38809	-6.78178	-7.49395	84	0.756567
85	-4.94176	-6.10967	-4.80255	-5.84941	-3.56276	-5.36358	-4.03125	-5.55899	-4.54219	-4.42443	-5.36767	-6.13464	-5.97601	-5.32661	-7.14272	-5.78996	-9.23879	-8.21201	-0.278208	-0.518834	-0.78603	85	-8.22395	-5.71455	-6.89228	-7.95248	-6.70359	-7.66028	-8.32774	-8.97721	-8.81482	-9.5969	-8.42899	-7.10314	-4.28681	-4.70681	-4.24793	-6.27302	-7.74269	-7.04953	-8.93362	-6.19707	-8.41953	-9.26537	-8.01752	-6.81871	-7.09354	85	0.923369
86	-4.59328	-6.09916	-4.67	-4.94603	-4.6984	-5.5321	-3.84535	-4.92807	-4.95461	-4.29702	-4.77435	-5.17674	-5.55464	-5.93718	-7.08396	-6.37483	-8.92617	-8.10031	-0.186719	-0.815696	-0.485123	86	-7.46193	-6.8165	-6.27153	-7.89045	-7.32644	-7.27476	-8.32814	-8.2374	-8.40397	-8.19457	-8.09127	-7.01649	-4.67112	-3.93074	-4.77267	-6.86927	-7.59821	-7.67302	-8.72116	-6.90523	-8.23509	-9.55555	-7.91656	-7.50139	-7.36933	86	0.668558
87	-5.3331	-6.44413	-5.19297	-5.43626	-5.20245	-5.88321	-4.4048	-4.85328	-4.96877	-4.71921	-5.15869	-5.34013	-5.24671	-5.1916	-6.81299	-6.46149	-8.46271	-7.98896	-0.199338	-0.478416	-0.330139	87	-7.19585	-6.03633	-6.60518	-7.73007	-7.7187	-6.51851	-7.57055	-7.95545	-8.5892	-8.76436	-8.37928	-6.87249	-5.05149	-4.05475	-4.67948	-6.77735	-8.43904	-7.79487	-8.99681	-5.85847	-8.5485	-9.27216	-7.90926	-7.43149	-6.31969	87	0.68552
88	-5.16277	-5.63582	-5.1283	-5.20627	-2.93377	-5.65574	-4.32034	-5.18635	-4.23774	-4.38448	-5.63241	-5.07242	-5.35084	-5.31059	-6.99488	-6.36986	-9.47758	-7.35704	-0.390879	-0.183413	-1.33968	88	-7.35762	-6.29526	-6.1657	-7.72313	-7.45222	-7.1379	-8.11948	-7.18815	-7.97954	-8.60095	-8.53136	-6.90181	-3.84186	-5.47129	-4.61748	-6.89205	-7.9241	-7.00854	-8.57583	-6.63499	-8.49266	-9.44584	-7.76411	-7.52681	-6.67205	88	0.776057
89	-5.59734	-5.33134	-5.11826	-4.43964	-3.73741	-5.80269	-4.70825	-4.48673	-5.51041	-3.95388	-5.07484	-5.30564	-5.92246	-6.03329	-6.37135	-5.97359	-8.44222	-7.94269	0.0832416	-0.633584	-0.550455	89	-7.61492	-6.1673	-5.88669	-7.62763	-7.58002	-6.86663	-7.22867	-7.84786	-8.27738	-8.83015	-8.67027	-7.37087	-4.21554	-3.61151	-4.29737	-6.45805	-7.83701	-7.64407	-8.66271	-6.47615	-8.28084	-8.61568	-7.68019	-7.44142	-6.53493	89	0.863247
90	-5.35024	-5.82699	-5.28294	-4.6427	-3.88785	-4.60064	-3.57978	-4.70631	-4.85372	-4.06279	-4.98461	-5.95142	-5.29208	-5.2797	-6.03937	-6.45004	-8.09322	-8.77199	0.00752645	0.42657	-0.828949	90	-6.78117	-5.59562	-6.26691	-7.69334	-7.01361	-7.00514	-7.85264	-7.43436	-8.65444	-8.06083	-8.00206	-7.33508	-4.14505	-3.75912	-3.95457	-6.33976	-7.0038	-6.10038	-8.27371	-6.92373	-8.29921	-11.3334	-7.84196	-7.38582	-6.45251	90	0.873597
91	-5.20004	-5.08604	-4.59529	-4.96178	-4.12172	-4.73835	-4.13182	-4.36933	-4.37669	-3.87482	-4.86969	-5.74191	-5.47915	-5.58708	-6.09176	-6.50616	-8.68137	-8.4629	-0.206098	-0.167153	-0.795091	91	-7.17389	-5.86471	-6.22881	-7.41338	-7.51793	-7.86578	-7.10107	-7.48502	-8.96082	-9.07269	-7.07216	-6.12925	-4.20372	-4.94524	-4.52915	-6.06241	-7.27753	-6.55954	-8.42852	-5.67067	-8.0031	-10.2031	-8.14766	-7.31116	-6.91971	91	0.877807
92	-5.3644	-5.35859	-4.26512	-6.11835	-3.46636	-5.06351	-3.55452	-4.77936	-3.92222	-3.40343	-5.25403	-5.63845	-5.42671	-5.48831	-6.83058	-5.87127	-8.0155	-7.16942	0.231066	-1.04891	-0.810351	92	-7.50403	-5.75557	-5.79432	-7.39991	-7.22526	-6.79019	-7.36189	-7.72456	-8.04633	-8.00707	-7.573	-6.68582	-4.10253	-4.47119	-5.26216	-5.91055	-7.35097	-7.00065	-7.99332	-7.18552	-6.9523	-11.293	-7.47666	-7.52681	-6.7576	92	1.19289
93	-5.23992	-5.14133	-4.51737	-5.72841	-3.99765	-5.21575	-3.96943	-3.63796	-4.47492	-4.31552	-4.77903	-5.57163	-5.15968	-4.48454	-5.96526	-5.60709	-7.69511	-8.48351	0.790367	0.074889	-0.76934	93	-7.27967	-5.14401	-6.30809	-6.75878	-7.43368	-6.99651	-7.28967	-7.01184	-8.47232	-8.58589	-7.67666	-7.53642	-4.18089	-4.23117	-4.37963	-6.48562	-7.02106	-6.26058	-8.29149	-6.3165	-7.66448	-9.16137	-8.22551	-6.7508	-8.09983	93	0.77413
94	-5.09718	-5.14133	-4.65915	-5.36706	-4.22633	-4.4902	-4.18668	-4.35628	-4.72848	-4.00224	-5.44429	-5.62034	-5.11505	-4.81328	-6.36012	-5.81133	-8.24617	-7.68638	-0.311108	-0.498858	-0.893327	94	-6.65124	-5.90912	-6.21149	-7.81169	-7.50544	-6.93486	-7.82415	-7.01655	-8.01954	-7.82044	-7.31175	-6.71772	-4.00015	-3.75232	-4.48944	-6.27981	-6.77142	-6.82616	-8.55134	-6.20752	-7.90007	-8.54385	-7.368	-7.24921	-6.82518	94	0.735485
95	-5.33161	-5.55483	-4.31533	-5.63848	-4.73731	-4.37404	-4.17318	-4.14583	-4.23862	-4.00981	-5.2851	-5.8402	-5.76365	-4.67027	-5.92783	-5.72925	-8.29527	-8.03813	-0.127679	0.335979	-1.59624	95	-6.0887	-5.62009	-5.97866	-7.13872	-7.00192	-7.06679	-7.35387	-6.89011	-7.98149	-7.51382	-7.49271	-6.42327	-3.89699	-3.67671	-4.33992	-6.21187	-7.40957	-22.5808	-7.55417	-5.78689	-8.06362	-8.51705	-7.6514	-6.46327	-6.49509	95	0.779778
96	-5.20004	-4.9887	-4.64871	-4.98954	-3.48149	-4.42244	-3.65684	-4.16409	-4.89044	-4.59642	-4.80755	-5.39057	-5.85886	-5.61759	-6.34926	-5.86326	-8.23416	-7.64553	-0.207	-0.15368	-0.568576	96	-7.19915	-5.43906	-6.14915	-7.85903	-6.44438	-6.4807	-7.11712	-7.86671	-7.52599	-7.24505	-7.12526	-6.53967	-3.58198	-4.01355	-4.30912	-5.55767	-7.22254	-6.634	-7.49493	-5.72657	-7.06325	-8.84654	-7.45476	-6.67971	-6.07906	96	1.00239
97	-4.47141	-4.97546	-5.05078	-4.87269	-4.18267	-3.66126	-3.35643	-4.63935	-4.10985	-4.04597	-5.88396	-5.88805	-5.51188	-4.75264	-5.69803	-5.87013	-8.15433	-7.9116	0.0607073	0.345735	-1.2505	97	-7.10691	-5.93885	-6.22535	-6.63349	-6.47784	-6.97021	-7.29247	-7.09234	-7.77568	-7.87892	-7.53647	-6.23315	-3.5997	-3.28588	-3.9412	-5.38023	-7.37465	-6.0293	-8.66389	-5.86088	-7.70915	-9.41224	-7.1523	-6.66065	-6.49509	97	0.737807
98	-4.36892	-5.13977	-4.38321	-4.29295	-3.53552	-4.37624	-3.4139	-4.29932	-4.23774	-3.01824	-5.24594	-4.99698	-5.28427	-4.90138	-5.52437	-5.98924	-7.17443	-8.199	0.14138	0.215654	-0.348737	98	-6.45616	-5.46277	-5.6831	-6.85713	-6.91242	-6.87855	-6.74876	-7.29575	-8.00129	-8.37647	-7.6278	-6.71772	-4.02614	-3.23987	-3.92945	-5.71113	-7.13384	-6.22034	-8.11496	-6.87266	-8.00418	-7.92454	-7.19893	-6.76669	-7.82326	98	2.19417
99	-4.20717	-4.75975	-3.87149	-4.74712	-3.00034	-4.57952	-4.09873	-4.52195	-4.08949	-3.98626	-5.03866	-5.32202	-5.23853	-4.72976	-5.69653	-5.04856	-7.13133	-7.43838	0.0345676	-0.620111	-0.741681	99	-5.68207	-5.44922	-7.05391	-6.6392	-6.7814	-6.73717	-7.45017	-7.24391	-7.44172	-8.20016	-7.50121	-6.07751	-4.12576	-3.96154	-3.88244	-6.52878	-7.17438	-6.74643	-7.72675	-5.91195	-7.63134	-8.3984	-7.72033	-6.56534	-6.73377	99	1.53222
100	-4.25562	-5.07903	-3.90443	-4.7061	-3.28393	-4.10389	-4.01776	-4.76892	-4.07755	-3.21588	-4.67262	-5.0125	-5.30101	-4.56119	-5.13213	-5.49103	-7.80532	-6.97529	-0.330488	-0.50722	-0.613879	100	-6.12969	-5.38111	-6.10027	-6.33925	-6.70198	-5.90283	-7.13036	-7.31656	-7.88557	-7.86946	-8.48718	-6.8199	-3.64459	-3.83113	-4.00968	-5.37264	-6.90226	-6.11166	-7.64895	-5.41492	-7.31577	-8.68286	-8.27781	-6.46169	-6.32516	100	1.13416
101	-4.29773	-5.10239	-4.09642	-5.14743	-4.92146	-4.93239	-3.63071	-3.74188	-4.12578	-3.89332	-4.18358	-4.97801	-4.97299	-4.79192	-5.23431	-5.78728	-7.5909	-6.99337	-0.253871	-0.378069	-0.895234	101	-6.56523	-5.88052	-6.42392	-6.26865	-5.75662	-6.3948	-7.20339	-7.34719	-6.99788	-8.12662	-8.27308	-6.14089	-3.48866	-3.92274	-3.80059	-5.61682	-6.89022	-5.89505	-7.3962	-4.92351	-7.66232	-8.38733	-7.07729	-6.20871	-5.71772	101	1.07344
102	-4.49862	-5.12887	-4.63184	-3.47079	-4.25097	-3.95649	-3.37776	-4.57108	-4.29792	-3.22681	-5.3166	-5.24917	-5.22216	-5.49899	-5.68343	-5.48034	-8.10346	-6.809	0.0800868	-0.595024	-0.0111111	102	-6.00342	-5.04126	-5.83974	-6.61635	-7.09665	-6.51687	-6.94177	-7.26747	-7.23203	-7.08379	-7.09934	-6.74057	-3.78831	-3.93274	-3.98617	-6.04762	-6.7064	-6.00825	-7.85273	-6.12147	-7.59496	-8.9541	-7.81236	-6.70434	-6.88494	102	1.24115
103	-3.93621	-4.46656	-4.72061	-4.55195	-3.76896	-4.03569	-4.05171	-4.90589	-3.63724	-3.73101	-4.55983	-4.97628	-4.58955	-5.03715	-5.05615	-5.15202	-8.87106	-7.55985	0.334724	-0.0533329	-1.18994	103	-6.68162	-5.22153	-5.95057	-6.67308	-6.38713	-6.32041	-7.79245	-6.77623	-7.06816	-7.56586	-7.28031	-6.54269	-4.19112	-4.22037	-4.45297	-5.68036	-6.41983	-5.77058	-6.98944	-5.94091	-6.9613	-8.1361	-6.89849	-7.14476	-7.24667	103	1.09716
104	-3.91161	-4.79246	-4.33702	-4.35635	-3.13825	-4.41364	-4.20627	-4.78806	-4.01427	-3.61621	-4.91012	-5.50179	-3.72079	-4.35373	-6.56148	-5.22646	-7.61952	-7.41814	0.145436	-0.429172	-1.25337	104	-6.08687	-5.00852	-5.79894	-5.66465	-6.67739	-6.08244	-6.73873	-7.02715	-7.53142	-8.01352	-7.18685	-5.75245	-3.50913	-3.14866	-4.0737	-5.81144	-6.75416	-5.30879	-7.81403	-5.47282	-7.70014	-7.64008	-6.57008	-6.56256	-7.05604	104	1.45557
105	-4.17996	-4.08616	-4.50572	-4.89714	-4.08281	-3.58514	-3.3708	-4.48934	-4.06471	-3.1385	-4.47215	-4.92153	-4.72604	-4.47691	-6.4593	-5.00695	-7.98901	-7.3838	-0.143002	0.497185	-1.06309	105	-5.67219	-4.8689	-5.62115	-5.42305	-6.21257	-6.46138	-6.65165	-7.23724	-7.1466	-6.88598	-6.72169	-6.12149	-3.27879	-4.39398	-4.11017	-4.82115	-6.48285	-4.82556	-7.45702	-5.47845	-7.59027	-7.99065	-6.65361	-5.35646	-7.06815	105	0.890362
106	-4.07337	-4.23412	-3.80039	-4.07747	-3.15165	-4.90071	-4.18929	-4.16887	-4.39793	-3.88491	-4.76924	-4.88489	-4.86179	-4.33504	-5.0846	-5.06116	-7.55805	-7.60576	1.10585	-0.329753	-1.20043	106	-5.47711	-4.59604	-5.98059	-5.87687	-6.14888	-6.62044	-6.47389	-6.59206	-7.76325	-7.67036	-6.22085	-6.94966	-3.82296	-3.75992	-3.75197	-5.31429	-7.11096	-5.11324	-8.04624	-5.86571	-7.14322	-8.68072	-6.83565	-5.86876	-6.55876	106	0.998702
107	-4.86275	-4.71537	-4.46836	-4.88263	-2.95582	-4.18133	-3.57063	-4.17844	-4.0948	-4.18474	-4.32446	-5.16381	-4.02054	-4.04901	-5.27473	-5.57807	-6.82719	-5.83798	-0.548169	-0.531378	-1.11746	107	-6.25157	-4.38378	-5.49877	-4.87538	-5.69736	-7.51972	-6.52445	-7.17755	-6.78236	-7.45921	-7.45831	-6.17408	-4.11395	-3.66991	-3.31111	-5.39542	-6.67229	-5.17642	-7.59919	-5.7704	-7.109	-8.6918	-7.145	-7.24007	-6.50134	107	0.716807
108	-4.10244	-4.36027	-3.72769	-3.494	-3.58481	-3.26042	-3.93329	-4.16018	-4.02223	-3.83235	-4.55685	-4.41887	-4.94621	-4.27402	-5.08422	-5.13942	-7.59691	-7.74964	-0.892943	-0.396652	-1.18994	108	-5.81859	-4.8911	-5.96943	-5.60956	-5.82959	-6.73635	-6.77404	-6.78565	-6.70042	-7.58564	-7.21617	-6.10079	-3.99936	-3.61471	-3.75764	-5.95451	-6.27455	-5.20951	-6.38403	-5.54561	-7.71023	-7.48748	-6.17762	-6.09831	-6.17047	108	0.580747
109	-4.46433	-5.09499	-3.93776	-3.25531	-3.57443	-3.52134	-3.38429	-3.88363	-3.88948	-3.81973	-4.05589	-4.70943	-4.53451	-4.16571	-5.26537	-5.78041	-6.67212	-6.57944	0.166618	0.239812	-1.08455	109	-6.51033	-4.7654	-5.47721	-5.65404	-6.22426	-6.00928	-6.5706	-6.2787	-7.38891	-7.19302	-6.73996	-5.88006	-3.19019	-4.5932	-3.3804	-5.94572	-6.27294	-4.68116	-6.50724	-6.01611	-6.36079	-8.57101	-7.08743	-6.17217	-6.38493	109	0.971332
110	-4.52135	-4.66397	-4.13779	-4.00287	-3.63625	-4.02645	-3.58413	-3.68883	-3.24385	-3.79282	-4.50663	-4.57967	-4.14624	-3.54484	-5.0715	-5.43644	-6.7025	-7.57684	0.382497	-0.248918	-0.360182	110	-5.36767	-4.40147	-5.01848	-5.77035	-6.11783	-6.27438	-6.70582	-6.50292	-7.50385	-7.36288	-6.59425	-5.07646	-3.60246	-3.5539	-3.45536	-5.49932	-6.35843	-5.39566	-6.8911	-4.93155	-7.49193	-7.92668	-5.84921	-5.90689	-6.71931	110	0.865601
111	-4.84858	-4.31627	-4.42217	-3.8106	-3.09588	-4.03481	-3.51229	-3.27445	-3.56688	-3.30545	-4.25806	-3.89035	-3.9655	-4.1966	-5.15384	-5.55708	-6.75372	-6.64812	0.368976	0.554792	-0.353029	111	-5.43538	-5.21928	-5.71043	-5.55446	-5.41718	-6.17861	-6.22832	-6.12242	-6.94778	-6.59442	-6.99314	-5.55112	-3.30911	-3.83713	-3.89703	-4.71245	-6.64299	-4.29608	-7.19835	-4.68102	-7.84856	-8.21114	-6.86525	-6.50537	-6.49743	111	0.675967
112	-4.08119	-4.36338	-3.68592	-3.73062	-3.16418	-4.4066	-3.48922	-3.27619	-3.34696	-3.92108	-4.46832	-4.47449	-4.72902	-3.90905	-4.92291	-5.88158	-6.65763	-6.1149	-0.596843	-0.488172	-1.87235	112	-5.81602	-4.91556	-5.47221	-5.59119	-5.66874	-6.24725	-6.09109	-6.07922	-6.72489	-6.51056	-6.09511	-5.89472	-2.89999	-3.69472	-3.3184	-5.65278	-6.29421	-5.59534	-7.14227	-5.22591	-6.87449	-7.11011	-6.02963	-5.86439	-6.25446	112	0.683648
113	-3.87732	-4.19713	-4.01649	-3.53875	-3.48754	-3.6793	-2.76302	-3.63535	-4.15277	-3.45767	-4.49641	-4.51803	-4.19571	-4.6615	-6.20929	-4.63472	-6.36762	-6.35819	-0.0195147	-0.236374	-0.29342	113	-5.10928	-4.57007	-4.6348	-5.47488	-5.72155	-5.70021	-5.9683	-6.09611	-6.83711	-6.44261	-6.96596	-5.4567	-2.87597	-4.29157	-3.01491	-5.55567	-6.42586	-4.29007	-7.01985	-4.63477	-6.94401	-7.29165	-6.4594	-5.669	-5.83765	113	0.692149
114	-5.2962	-4.30342	-3.91005	-5.06372	-3.92416	-3.82229	-2.32112	-2.95355	-3.82222	-4.43789	-3.7588	-4.57364	-4.10496	-3.79655	-4.76422	-4.38848	-7.34999	-6.87334	-0.396738	-0.110011	-0.542348	114	-5.85519	-5.01454	-5.5234	-6.14825	-6.86807	-6.03312	-6.38762	-5.82947	-6.76683	-6.65548	-5.78075	-5.87144	-3.45598	-4.09675	-3.54896	-5.68635	-6.15334	-4.61009	-7.03485	-5.07632	-6.93609	-7.5829	-6.38926	-5.54788	-6.07984	114	0.574714
115	-3.66898	-3.89226	-3.59755	-3.73849	-2.88795	-4.15097	-2.92019	-3.32402	-3.31642	-3.49215	-3.70262	-4.72409	-3.92757	-4.36898	-5.40273	-4.60227	-7.14582	-7.00855	0.0404265	0.301136	-1.08789	115	-5.31607	-4.14217	-4.90188	-4.94924	-6.28957	-5.6887	-6.35472	-6.21901	-6.75945	-6.74536	-6.85296	-5.67787	-3.82532	-3.02545	-3.20697	-5.21039	-6.36003	-5.93792	-6.7983	-5.11935	-6.83306	-7.10225	-6.9585	-5.52643	-5.89233	115	0.554591
116	-3.72899	-4.89097	-3.43729	-3.88187	-3.2139	-3.95077	-3.54756	-3.85885	-3.34386	-2.88493	-3.64601	-3.82181	-3.90153	-3.74506	-4.79828	-4.7607	-6.43721	-7.00746	0.0422292	-0.327895	-0.850408	116	-4.56869	-4.70029	-5.0789	-6.20702	-6.08961	-6.18313	-5.36881	-5.63274	-6.56723	-6.11536	-5.99145	-5.15233	-3.27997	-2.90464	-3.70496	-5.48294	-5.71907	-4.51194	-6.6656	-4.49322	-7.01606	-7.47855	-6.11031	-5.14319	-6.15328	116	0.363951
117	-3.59444	-4.39765	-4.24584	-4.42183	-3.80441	-3.88521	-3.32465	-3.6123	-3.78195	-3.21167	-3.63324	-4.46328	-3.6836	-3.37551	-4.60441	-4.42055	-6.52905	-6.04079	0.0791854	0.451657	-1.15227	117	-6.13701	-4.1162	-4.97961	-5.97522	-5.86224	-5.75816	-5.76967	-5.372	-6.38278	-6.07365	-6.6516	-5.20191	-3.07167	-3.5515	-2.71141	-5.88297	-5.61392	-5.04142	-6.8599	-5.63609	-7.55353	-8.0757	-5.65743	-6.07924	-6.18688	117	0.701105
118	-3.89708	-3.75092	-3.74778	-4.16283	-2.84256	-4.21784	-2.67856	-3.64492	-3.88859	-3.29788	-3.63026	-3.80025	-4.09604	-3.59404	-5.26911	-4.86951	-7.25603	-6.66078	0.153999	0.993348	-0.926231	118	-4.5072	-4.47486	-5.1297	-4.95047	-6.16419	-5.73555	-5.60034	-5.45054	-6.10203	-6.25297	-6.66944	-5.62915	-3.69735	-3.62991	-3.85246	-5.04334	-6.06424	-5.60662	-6.94718	-4.38665	-7.32514	-7.38778	-6.69699	-5.3358	-5.72202	118	1.35248
119	-3.76179	-3.84242	-3.35455	-3.5342	-2.66618	-3.76157	-3.21276	-3.10139	-3.72796	-3.00478	-4.09505	-4.61545	-4.18306	-4.24161	-5.33386	-4.4278	-7.05185	-7.06856	-0.277307	-0.300021	-0.751219	119	-5.41964	-4.77707	-4.88033	-5.48141	-5.09265	-6.01175	-6.72789	-6.40161	-6.09348	-7.50178	-6.26715	-5.59466	-3.39888	-2.83703	-3.37837	-4.8663	-5.33939	-5.79164	-6.80659	-5.8263	-6.4649	-6.75846	-5.36795	-5.79807	-5.21145	119	1.82838
120	-3.25007	-3.48537	-3.1027	-3.31084	-2.81619	-4.224	-4.03778	-4.54804	-4.27756	-2.94591	-3.43405	-4.06969	-3.93538	-4.65387	-4.47678	-4.33656	-6.78021	-6.44532	-0.104244	-0.0686638	-1.39786	120	-5.58069	-3.80646	-5.28672	-5.823	-5.31841	-6.10874	-7.01079	-5.05079	-6.45229	-6.54238	-6.1652	-4.70268	-3.05828	-3.31588	-3.59718	-4.46387	-5.65285	-4.75111	-7.82667	-4.51534	-7.40511	-6.97109	-6.01179	-4.92199	-5.13645	120	1.26611
121	-3.45878	-4.15235	-3.23324	-3.46955	-2.73621	-4.08453	-3.80486	-3.12922	-2.76505	-3.37147	-3.65623	-4.40249	-3.73566	-4.30377	-4.60778	-5.34023	-7.45808	-5.12364	-0.193479	0.656069	-0.76934	121	-4.60895	-4.13991	-4.93613	-5.75117	-4.69354	-6.29369	-4.94748	-4.90942	-7.02195	-6.09945	-5.79944	-5.66579	-3.40794	-3.03945	-4.15312	-5.16723	-5.92296	-4.88272	-7.45031	-5.32443	-7.2974	-7.32417	-4.99697	-5.78814	-5.48607	121	0.825484
122	-4.03349	-3.79492	-3.30956	-3.24536	-3.23594	-4.18265	-2.87665	-2.9279	-3.70937	-2.93413	-3.56386	-4.6077	-4.01831	-3.80875	-5.13325	-5.08139	-6.97202	-6.83683	0.740791	-0.0830655	-0.147497	122	-5.00167	-4.72701	-4.51319	-5.06066	-5.97673	-5.76432	-5.60556	-5.15485	-5.83642	-6.31403	-7.5747	-5.21053	-3.02796	-3.31828	-3.54694	-4.84153	-5.92135	-4.54616	-7.15688	-5.17363	-6.93501	-7.46283	-5.72879	-5.2254	-4.99504	122	0.968527
123	-3.46735	-3.43281	-3.36097	-3.43971	-2.86028	-4.03789	-2.5719	-4.17757	-2.99737	-3.24153	-3.93799	-4.08521	-3.71112	-3.86443	-4.43337	-5.12415	-7.50118	-6.15249	-0.127679	-0.145783	-0.398809	123	-4.16243	-4.39846	-4.78527	-4.89905	-4.99711	-5.46552	-5.40252	-5.19726	-6.62354	-7.1698	-5.77098	-5.86454	-2.48615	-3.14026	-3.35609	-4.88709	-5.49753	-4.87483	-5.76045	-5.11573	-6.65366	-5.90686	-5.97976	-4.81238	-5.31341	123	0.739323
124	-4.5549	-3.98492	-3.19227	-3.37963	-2.60263	-4.60416	-2.9363	-3.58709	-3.38678	-2.56576	-3.81413	-4.18953	-3.86955	-3.255	-4.72492	-4.67061	-5.43258	-5.69012	0.729074	-0.427313	-0.0745353	124	-5.92473	-3.98147	-4.78873	-5.54793	-6.07268	-5.26536	-4.27536	-4.70326	-6.42161	-6.54883	-5.65713	-5.4761	-3.01418	-4.13116	-3.18914	-5.37744	-5.2824	-4.11934	-6.63085	-5.08436	-7.64755	-7.0976	-6.04787	-4.69562	-5.53256	124	0.0836
125	-2.99999	-3.91912	-3.41761	-4.25068	-3.19055	-3.06859	-3.68905	-3.66796	-3.86514	-3.68307	-4.1955	-3.22732	-4.03095	-3.73629	-4.7238	-4.9241	-5.71447	-5.23426	0.377539	-0.552748	-0.648691	125	-4.62176	-4.36082	-4.69676	-4.94516	-5.15957	-6.32658	-5.41455	-5.57502	-5.75914	-5.77649	-5.72595	-6.03483	-3.10199	-3.4995	-3.56112	-3.84284	-5.83988	-3.69064	-6.9227	-5.1853	-6.05568	-6.5176	-5.44701	-5.38187	-5.01379	125	0.47437
126	-3.808	-3.95806	-3.42644	-2.94741	-2.52266	-3.08575	-3.04993	-3.75884	-3.40404	-3.11201	-4.72668	-4.28092	-3.11756	-3.41785	-4.90345	-4.72558	-6.4637	-6.54726	-0.00914891	-0.0468289	-0.552362	126	-4.55039	-4.37701	-4.10102	-4.46034	-4.92011	-4.38705	-5.37884	-5.83615	-6.36531	-5.60964	-5.76588	-5.74081	-2.8236	-2.33859	-3.70618	-5.75109	-5.32214	-4.27352	-6.63322	-5.52027	-6.57369	-7.01934	-5.73203	-4.2131	-5.21302	126	0.728545
127	-3.1118	-4.00439	-2.73076	-4.10606	-2.60004	-3.45226	-2.86969	-3.99538	-3.9886	-3.27433	-4.0295	-3.57522	-3.64529	-3.21229	-4.43075	-4.17774	-7.87456	-6.46773	0.723215	0.0186758	-0.196615	127	-4.76889	-4.25507	-4.31345	-4.95618	-5.08096	-5.58677	-5.02131	-6.17111	-6.11329	-5.7408	-5.52204	-4.95919	-3.38668	-3.95874	-3.15551	-5.40381	-5.52482	-4.20771	-6.30425	-4.40515	-6.19725	-7.03935	-5.55688	-4.86957	-5.14465	127	0.490183
128	-3.26311	-3.62866	-3.02076	-4.25275	-2.40853	-2.88379	-3.0212	-3.98364	-3.19252	-3.08762	-4.19039	-3.42821	-2.80999	-3.80684	-4.56473	-4.34572	-6.60253	-5.93667	0.179238	-0.626615	-0.884266	128	-3.89159	-3.92991	-3.63498	-4.85579	-5.07572	-5.31551	-4.88809	-5.12893	-5.86554	-6.72644	-5.7319	-5.57138	-2.40031	-2.80383	-2.7653	-4.6505	-5.76563	-4.15356	-6.33822	-3.6982	-6.53695	-6.60051	-5.17941	-4.5316	-5.19583	128	0.658853
129	-3.53518	-3.40361	-3.3686	-3.56527	-3.14041	-2.94583	-2.69641	-4.3428	-2.87214	-2.75331	-4.3866	-4.13823	-4.07298	-4.73434	-4.74251	-4.48049	-5.79819	-5.87883	0.0872977	0.534351	-1.10077	129	-4.23856	-4.41126	-4.60401	-5.16676	-5.32002	-5.38045	-4.43466	-5.56991	-5.64071	-5.672	-5.59638	-5.23683	-2.53065	-3.13546	-2.34511	-4.83953	-4.86219	-4.05955	-7.09251	-5.66022	-5.79018	-6.75953	-5.4616	-6.37273	-4.8216	129	0.484434
130	-2.90383	-3.43281	-2.62191	-3.90093	-2.76647	-2.99599	-1.99721	-3.61622	-3.22659	-2.86979	-3.64133	-3.78258	-3.31913	-4.02384	-4.80277	-3.9567	-6.34325	-6.27143	0.0674676	0.230985	-0.276253	130	-5.11403	-4.36685	-4.26727	-5.04637	-6.45324	-5.01013	-5.0478	-4.89725	-5.90593	-5.82208	-5.8381	-5.28727	-2.73934	-2.76983	-2.58134	-4.61893	-4.89148	-4.08662	-6.49381	-5.04857	-5.25848	-6.94429	-5.37159	-4.66663	-4.88097	130	0.358272
131	-3.60563	-3.61737	-3.13202	-3.67633	-3.31376	-3.00259	-2.48003	-3.85493	-3.54697	-2.79032	-4.04482	-3.91665	-3.9298	-3.45064	-4.57971	-5.21577	-5.59189	-5.61493	0.824168	0.551076	-0.529949	131	-4.10936	-4.25206	-4.74986	-4.38239	-4.58752	-5.53704	-4.93745	-5.58719	-6.18513	-6.07666	-5.40395	-5.7158	-3.33076	-2.95985	-3.42051	-4.68207	-5.18889	-4.33031	-5.81574	-4.49925	-6.90079	-7.25019	-5.28767	-6.25438	-4.3876	131	1.32998
132	-3.88515	-3.15364	-2.67212	-3.80521	-2.8391	-3.51078	-3.10305	-3.58709	-2.69823	-3.48711	-4.38958	-4.10159	-4.16633	-3.26568	-3.79635	-4.47743	-5.7286	-6.21359	0.396017	0.813094	-0.281498	132	-4.31249	-4.46056	-4.81105	-5.03658	-4.54479	-4.79107	-4.89812	-5.3826	-5.70827	-7.54952	-5.12782	-5.04326	-2.17666	-3.05305	-2.17533	-4.20491	-5.34822	-4.08249	-6.12101	-4.96613	-6.15042	-6.41789	-5.38538	-4.25877	-4.03134	132	0.786127
133	-3.06484	-3.50796	-3.13725	-2.47749	-2.91259	-3.17903	-2.66071	-3.36924	-2.72921	-2.16207	-3.3302	-3.73429	-3.65682	-3.11542	-4.16052	-4.53164	-6.51068	-5.89691	0.241432	0.0865033	-0.95389	133	-3.60135	-3.94007	-3.97749	-4.94802	-5.61794	-5.63362	-4.63128	-5.06178	-5.31607	-6.00957	-4.95323	-4.59533	-2.98425	-2.78263	-2.53028	-4.82794	-5.15999	-3.96854	-6.40496	-4.53866	-6.28875	-7.18515	-5.16847	-4.65154	-3.41804	133	0.711116
134	-3.43977	-3.16181	-2.62713	-3.753	-2.51833	-2.97091	-2.84183	-2.79528	-2.36546	-2.45853	-3.80009	-4.87196	-3.51736	-3.38276	-4.15229	-4.54691	-6.43297	-5.71904	1.01841	0.23656	-1.12461	134	-5.06096	-3.95286	-4.05446	-5.11004	-4.73144	-4.50419	-4.38772	-4.88233	-5.89661	-5.64576	-5.57429	-3.95986	-2.87282	-3.41229	-2.79245	-4.30642	-5.2828	-3.61957	-5.95751	-5.76719	-5.37736	-6.94751	-5.49161	-5.33144	-4.28721	134	1.00852
135	-3.13267	-3.82334	-2.88179	-3.35311	-2.92599	-4.2746	-3.50794	-3.35402	-2.99914	-2.3841	-3.08972	-3.91406	-4.00827	-3.39687	-3.49245	-3.95746	-5.62051	-5.16666	0.45731	-0.104436	-0.488938	135	-4.64262	-3.88324	-4.38465	-4.57379	-4.87697	-5.5843	-4.29302	-4.91335	-5.92534	-6.0844	-6.1635	-4.61904	-3.09372	-2.83663	-2.86741	-4.4303	-5.27919	-4.2017	-5.69292	-5.33811	-6.31613	-6.82565	-5.32254	-4.47084	-4.65987	135	0.992746
136	-3.66265	-3.52275	-3.54092	-2.9499	-2.91864	-2.59912	-3.8632	-3.07748	-3.14428	-2.70159	-3.26678	-3.64635	-3.45488	-3.48001	-4.21741	-4.48049	-6.29238	-5.07013	0.262164	-0.397581	-0.975349	136	-3.8689	-4.09023	-4.15375	-5.13779	-4.32064	-4.72284	-5.24321	-4.86387	-5.89117	-7.01327	-5.51015	-3.79949	-2.58656	-2.30458	-2.53717	-4.6553	-4.7169	-3.79406	-5.56694	-5.39601	-5.00127	-7.69726	-5.32254	-5.26035	-5.222	136	0.867282
137	-3.14981	-3.0014	-3.97793	-2.40746	-2.26674	-3.10423	-2.68466	-3.54012	-3.03144	-3.15785	-3.89671	-3.59074	-3.05582	-3.13182	-4.21516	-4.76261	-5.97764	-5.37778	1.19553	0.637951	0.155795	137	-4.20891	-3.81662	-3.93554	-5.22186	-5.59093	-5.09521	-4.89331	-4.63062	-6.21503	-6.10418	-4.97659	-4.77079	-2.79131	-3.88433	-2.81028	-4.22689	-4.78352	-4.27879	-4.9556	-4.47352	-5.68175	-7.23661	-5.66068	-4.93112	-5.45287	137	0.601526
138	-3.37269	-3.37518	-2.6677	-2.50857	-2.74443	-3.71185	-2.51617	-3.94712	-3.30447	-2.6158	-2.5845	-3.61833	-3.19938	-3.15622	-3.48646	-4.06474	-6.61878	-6.44965	0.204476	0.54132	-0.835148	138	-4.5621	-3.73006	-3.72272	-5.72219	-5.35429	-4.67434	-4.22801	-4.80811	-5.88768	-6.44433	-4.54032	-4.76778	-2.57356	-2.95985	-2.51813	-4.95023	-5.21337	-4.07083	-5.86392	-4.46547	-5.06071	-6.2846	-4.83438	-4.95098	-5.17552	138	0.968702
139	-2.96383	-2.9574	-2.70184	-2.64988	-2.83088	-2.20488	-2.88231	-4.24366	-2.59999	-2.96777	-3.41064	-3.44718	-3.22801	-3.50747	-4.17212	-3.72649	-6.78021	-5.54299	0.625416	-0.211287	-0.252886	139	-5.10013	-4.41916	-3.7208	-4.87334	-4.89108	-4.62708	-4.72759	-4.5081	-5.67954	-5.94636	-5.28798	-4.87987	-2.49048	-3.43829	-2.65428	-3.67979	-3.95794	-3.90085	-5.37066	-5.26773	-5.95949	-6.34928	-5.03873	-4.38863	-3.68367	139	0.660852
140	-2.70704	-3.79492	-2.75406	-2.5786	-2.5607	-2.56612	-2.60847	-2.95007	-2.55176	-2.12927	-3.8784	-3.24112	-3.10603	-2.94571	-3.8495	-4.01625	-5.68374	-4.70935	0.0773827	-0.108152	-0.519458	140	-4.52733	-3.63786	-4.11757	-4.88558	-4.66452	-4.91067	-5.21793	-4.72879	-5.4648	-5.35248	-5.23487	-4.5742	-2.28258	-2.60501	-2.71384	-3.8904	-5.06126	-3.82564	-6.80067	-4.93597	-5.82008	-6.27674	-5.23496	-3.9363	-4.28174	140	1.07339
141	-2.8509	-3.21593	-2.5472	-2.94078	-1.49163	-3.71493	-2.2223	-2.82224	-3.07348	-3.20074	-3.68942	-3.10834	-3.07739	-3.39611	-4.22302	-4.04336	-6.27189	-6.09104	0.521308	0.453515	-0.7846	141	-4.21294	-3.64652	-4.26535	-4.61256	-3.93	-4.86217	-4.73962	-4.44959	-5.34675	-4.98911	-5.07642	-4.51169	-2.42866	-2.57901	-3.14741	-3.84724	-5.0733	-3.22509	-5.74979	-3.97286	-6.74516	-5.90472	-4.60247	-4.22223	-4.77003	141	0.793464
142	-3.21802	-3.55234	-2.43514	-2.74188	-2.25334	-2.71395	-3.45482	-3.07748	-2.75089	-2.63431	-3.13611	-3.96708	-2.79921	-3.45674	-4.60104	-3.45314	-7.12921	-5.65686	0.294162	-0.201996	-0.432667	142	-4.16133	-4.78459	-4.45854	-4.72315	-5.03137	-4.47665	-4.55504	-4.08558	-5.35956	-5.15983	-4.81262	-4.50393	-2.48812	-2.64702	-2.77867	-3.57269	-5.14353	-3.52744	-5.51362	-3.52206	-6.78407	-6.52403	-4.77519	-4.72302	-4.92512	142	0.742704
143	-2.89041	-3.1295	-2.5223	-2.94741	-2.52352	-3.49626	-2.17832	-3.61622	-2.59158	-3.06407	-3.40766	-3.03376	-4.00678	-3.44492	-4.46406	-4.17393	-5.45696	-4.61102	0.0336662	0.788007	-0.650598	143	-3.83925	-3.36425	-4.09486	-4.46972	-6.09042	-4.96862	-4.45152	-4.58428	-5.98747	-5.7494	-4.80242	-4.41038	-2.28927	-2.5242	-2.60241	-4.07743	-4.99343	-3.15251	-5.61077	-4.09109	-5.75488	-6.31712	-4.6945	-4.93351	-4.51338	143	0.606705
144	-3.70178	-2.99244	-2.56086	-3.69622	-2.16126	-2.75707	-2.77434	-2.73397	-2.54379	-2.78611	-3.52939	-3.27086	-3.19603	-2.51361	-3.35322	-3.67152	-5.41845	-4.73104	0.316246	-0.525803	-0.339677	144	-4.74913	-3.58668	-4.21609	-4.23792	-4.51616	-4.9267	-4.6682	-4.36713	-5.75526	-5.52794	-3.82027	-4.22155	-2.32195	-2.62741	-2.69642	-3.94675	-4.50057	-3.27323	-5.46386	-3.40062	-5.76965	-6.09412	-3.93795	-3.922	-4.34541	144	0.638513
145	-2.76966	-2.72183	-2.85929	-2.73317	-2.23043	-2.70163	-2.97026	-2.50656	-2.68407	-2.62337	-2.7224	-3.61574	-2.93049	-2.48463	-4.17212	-3.86927	-5.58766	-5.00253	-0.145256	0.284876	-0.50849	145	-4.65031	-3.23931	-3.49759	-3.75105	-5.13337	-4.46884	-4.69549	-4.87722	-5.4648	-4.82526	-3.90906	-5.08594	-2.15972	-2.90664	-2.88605	-4.19772	-4.99503	-2.69223	-4.94534	-4.36574	-5.17851	-5.94939	-4.54327	-4.01811	-4.16259	145	0.721227
146	-2.93998	-3.22139	-2.43192	-2.19529	-2.77987	-2.95639	-2.00331	-2.91138	-2.72213	-2.59436	-3.17229	-3.73343	-3.27264	-3.83621	-3.18143	-3.78337	-6.39835	-5.37019	-0.0303311	-0.514188	-0.242395	146	-4.24368	-3.25022	-3.55878	-4.15875	-4.08561	-4.38212	-4.86482	-4.8678	-4.65515	-5.93217	-4.65969	-4.80873	-3.01103	-2.64501	-2.44803	-3.35809	-4.3039	-3.08558	-5.30669	-5.15876	-5.44364	-6.04123	-4.80681	-3.98753	-4.43565	146	0.744944
147	-2.81624	-3.27161	-2.43755	-3.34316	-2.57929	-2.04033	-2.94588	-2.79441	-2.5376	-2.35719	-3.49619	-3.85241	-2.69508	-2.77524	-4.28328	-3.90783	-6.10233	-4.93059	-0.0916243	0.370822	-1.03162	147	-4.22099	-4.14781	-3.54069	-4.67296	-3.90742	-4.21854	-4.06751	-4.73821	-4.96542	-5.39119	-5.02672	-3.96503	-2.82163	-2.54901	-2.58742	-3.49916	-4.43434	-3.33979	-5.80034	-3.7923	-5.61871	-6.30568	-4.41394	-3.65909	-3.89852	147	0.263517
148	-2.92507	-2.9792	-2.50864	-3.10861	-2.38	-2.6066	-2.73603	-3.47186	-2.74204	-1.9699	-3.42894	-3.8994	-2.42991	-2.93732	-3.30681	-4.12048	-4.52616	-4.83298	-0.0479079	-0.616394	-0.353983	148	-4.91639	-2.90661	-3.7004	-4.83008	-5.14627	-5.20289	-3.63534	-3.85664	-5.28578	-4.62917	-4.17031	-4.14007	-2.37354	-2.82543	-2.32079	-3.93875	-4.29507	-2.17591	-5.55351	-3.75973	-5.19436	-5.98084	-4.7241	-3.45338	-3.92782	148	0.59332
149	-2.18414	-2.83981	-2.63878	-2.2732	-1.62824	-2.69108	-2.3947	-1.66084	-3.18455	-1.763	-3.15101	-3.63514	-3.52628	-2.81795	-4.36038	-4.10063	-6.08184	-5.0752	1.02923	-0.213146	0.349882	149	-3.45971	-4.04432	-3.18549	-4.56889	-3.60789	-4.48281	-4.42985	-5.03744	-5.30947	-5.07124	-4.61508	-4.64405	-2.92677	-2.5238	-2.22111	-4.16415	-4.14176	-2.65349	-5.30827	-4.18961	-6.43536	-5.84861	-4.74478	-3.72979	-3.73524	149	0.207582
150	-2.39062	-3.16921	-2.15397	-2.99093	-1.89194	-2.88555	-2.36336	-2.28263	-2.44644	-2.71547	-2.7424	-3.07342	-2.76053	-3.34462	-4.6875	-3.77956	-5.76534	-5.33801	-0.201141	0.407523	0.342729	150	-4.30883	-3.40641	-3.31364	-3.829	-4.52705	-4.5868	-4.12168	-3.85821	-4.64855	-5.28282	-5.58704	-4.21422	-2.5838	-2.61821	-3.5206	-3.96193	-3.87727	-2.89717	-4.79132	-3.41228	-5.75236	-5.98298	-4.32717	-3.32193	-3.98563	150	0.505927
151	-2.36155	-2.8145	-2.72192	-2.6677	-2.25247	-2.72935	-2.29979	-3.14661	-2.75708	-2.55988	-2.95607	-3.62393	-2.12755	-2.44954	-3.80272	-3.62685	-4.10332	-4.60668	-0.0790051	0.478602	-0.542348	151	-4.06983	-3.53888	-3.01577	-4.50359	-4.51213	-4.47706	-4.18909	-4.48768	-4.77048	-6.04182	-5.65203	-4.47462	-2.38023	-3.23587	-2.43547	-3.51554	-3.9459	-3.30481	-5.40463	-4.2628	-6.18464	-5.9719	-3.8674	-3.47681	-3.83211	151	0.385186
152	-3.07825	-3.12404	-2.43232	-2.48992	-3.3358	-2.4944	-2.57886	-2.58917	-2.5907	-2.00942	-3.35531	-2.9303	-1.89511	-3.23479	-3.56842	-4.31518	-6.42484	-4.9841	-0.849226	0.37268	-0.39261	152	-4.08264	-3.83093	-3.4314	-4.59623	-4.53068	-4.12812	-3.77177	-4.12995	-5.14405	-5.51374	-4.22596	-4.15085	-2.18729	-3.5595	-2.30985	-3.37727	-3.78576	-2.56851	-5.06539	-3.95677	-5.64717	-5.93152	-3.97079	-2.85331	-4.32393	152	0.566258
153	-2.60455	-2.84721	-2.644	-2.45884	-1.64683	-2.82219	-2.38948	-3.43446	-2.65177	-2.58258	-2.81604	-2.70785	-2.29156	-3.10893	-3.70728	-3.21148	-5.55092	-5.94969	-0.473355	0.328081	-0.813212	153	-3.54279	-3.01877	-2.93726	-4.16772	-4.57583	-3.9781	-4.67342	-3.70782	-4.92659	-4.80935	-5.46894	-4.02151	-2.52041	-3.19267	-2.35686	-3.03118	-4.34444	-3.35558	-4.42602	-3.59646	-5.41626	-5.51269	-4.41759	-4.35408	-3.63094	153	0.588087
154	-2.12935	-2.91807	-2.72956	-3.12063	-2.15521	-3.31806	-1.58405	-2.23306	-2.29731	-2.95936	-3.20038	-3.06135	-2.37859	-2.29623	-3.47223	-3.35503	-4.81794	-4.95517	0.790367	0.20404	-0.383549	154	-4.38093	-3.09065	-3.08543	-4.23139	-4.23437	-3.92632	-4.04744	-4.37184	-5.70439	-4.85278	-4.85552	-4.21422	-2.30069	-2.60621	-2.77705	-3.40085	-4.10885	-2.34776	-5.15859	-4.00422	-5.94689	-6.62945	-4.06931	-4.60269	-3.58211	154	0.688727
155	-2.50839	-2.51236	-2.60102	-2.95529	-1.9771	-2.90491	-2.02333	-2.43438	-2.56282	-2.39882	-2.51214	-2.56429	-2.68652	-3.3103	-3.07962	-3.5986	-4.94475	-5.01519	-0.515269	0.283947	0.127182	155	-3.42933	-3.54001	-2.46968	-3.44864	-4.58308	-3.80055	-3.29627	-4.67892	-4.55536	-5.06866	-4.40268	-3.74603	-2.86376	-2.64101	-2.03715	-3.36408	-4.49615	-3.41349	-4.91256	-3.85383	-5.88745	-5.89114	-3.67887	-3.40215	-3.44343	155	0.494883
156	-2.16551	-2.60269	-2.3532	-2.2877	-2.24296	-2.91547	-1.88489	-2.03217	-2.75576	-2.25164	-2.50107	-3.17947	-2.56082	-2.03881	-2.83447	-3.36228	-4.97301	-4.53365	0.295965	0.347593	-1.19805	156	-4.14523	-3.87948	-2.84144	-4.54318	-3.98523	-3.71547	-4.06871	-3.62732	-4.8963	-4.89321	-4.79902	-4.36684	-2.6157	-3.07426	-2.4695	-3.19583	-3.86964	-3.83166	-4.64283	-3.12717	-5.63708	-6.34821	-4.22095	-4.02724	-3.52546	156	0.446381
157	-2.28813	-2.39049	-2.5721	-2.51313	-2.17812	-2.67876	-1.80347	-2.41046	-1.97693	-1.81599	-2.8071	-3.88431	-2.33842	-3.25157	-3.29932	-3.3348	-5.87378	-4.74261	-0.0781038	0.224017	0.0790179	157	-3.85792	-3.08237	-2.63593	-4.1665	-5.00477	-3.46846	-4.02337	-4.34632	-4.01404	-4.69711	-4.78883	-4.05816	-2.96614	-2.06496	-1.94234	-3.32212	-4.05868	-3.56692	-4.73998	-3.07127	-5.18427	-5.87434	-4.35555	-3.55822	-2.80708	157	-0.578201
158	-2.32502	-2.45707	-2.89504	-3.13182	-1.49336	-2.43192	-1.10688	-2.61961	-2.46458	-2.27014	-2.25378	-3.38381	-3.3526	-2.93503	-3.61034	-3.27524	-6.06348	-4.08502	0.522209	-0.282832	-1.04879	158	-3.72249	-3.59571	-3.24013	-4.56114	-4.23276	-3.44667	-3.58077	-3.93479	-4.77048	-5.42774	-4.45323	-4.19568	-2.41882	-2.64301	-2.45978	-2.42654	-4.08597	-3.26909	-5.59735	-3.74927	-4.94616	-6.23743	-4.2992	-3.19167	-3.80633	158	0.161756
159	-2.66008	-3.10107	-2.48815	-2.86205	-2.60955	-1.98137	-1.9946	-1.6991	-2.22651	-2.34541	-3.54556	-3.53168	-2.64524	-2.87973	-3.18217	-3.38443	-5.41845	-4.10129	-0.376007	0.418672	-0.404055	159	-3.83596	-3.33302	-3.03732	-4.28607	-3.47002	-4.88519	-5.00245	-3.23778	-4.40935	-4.77624	-3.95366	-4.6199	-1.88803	-3.07746	-2.03918	-3.54152	-3.87566	-3.78165	-4.40667	-3.54096	-4.36978	-5.13281	-4.31014	-3.53559	-2.74184	159	0.311123
160	-3.1759	-2.84409	-2.23029	-1.82192	-1.20805	-2.12657	-1.64238	-3.15618	-2.42343	-1.47747	-3.20038	-3.40838	-2.82822	-3.07919	-2.18249	-3.2153	-5.37959	-4.53799	1.09909	0.253285	-0.340631	160	-3.56585	-3.76808	-3.07965	-3.42457	-5.0342	-3.97728	-3.51777	-3.66423	-4.11306	-4.91299	-4.46938	-4.27501	-1.82424	-1.77893	-2.03391	-3.09033	-4.05828	-2.95847	-4.50816	-3.27314	-5.23686	-4.6736	-4.45935	-3.89063	-4.0665	160	0.498274
161	-2.50206	-2.86979	-2.11782	-2.3511	-2.57842	-2.91151	-1.71727	-2.55917	-2.35971	-2.18183	-2.53853	-3.50883	-2.13276	-2.559	-3.33974	-3.3787	-4.28489	-4.33844	0.24639	-0.3934	-0.63963	161	-3.58524	-3.28597	-2.98845	-3.55761	-3.97757	-3.85398	-3.42026	-3.72509	-4.44119	-5.3069	-4.19453	-2.96053	-2.2562	-2.11616	-2.24421	-3.33651	-3.56341	-2.53165	-5.14595	-2.58107	-4.72677	-6.11521	-4.05512	-4.29928	-3.38132	161	0.287099
162	-2.33732	-2.6646	-1.69768	-2.38425	-2.50234	-2.17629	-1.05986	-2.07435	-1.75302	-2.30589	-2.71857	-3.19628	-2.92528	-2.82901	-3.38802	-3.69175	-5.54279	-4.25782	-0.050612	0.139465	-1.43553	162	-3.1497	-3.11361	-3.04309	-3.36376	-4.88262	-3.84288	-3.97321	-3.48438	-4.88543	-4.44812	-3.96853	-3.59686	-2.0979	-2.09056	-1.7527	-3.48317	-4.07273	-2.8701	-5.40976	-3.54177	-4.51063	-5.00416	-3.92376	-3.71906	-2.65122	162	0.591152
163	-2.47187	-2.18958	-1.95153	-2.12111	-2.16126	-1.99193	-1.73425	-3.0853	-1.97605	-2.56997	-1.5383	-3.29414	-2.54817	-3.47848	-3.15186	-3.40237	-4.71585	-4.43496	0.118395	0.0632747	-0.692563	163	-3.9216	-3.79743	-2.9288	-3.60372	-3.43333	-3.71383	-4.05747	-3.42941	-4.01521	-4.75732	-3.89122	-2.62167	-1.9719	-2.70342	-2.28514	-3.05876	-3.62803	-2.37296	-4.36441	-2.90358	-3.78548	-5.21679	-4.28501	-3.41803	-3.16998	163	0.466058
164	-2.78568	-2.4193	-2.05677	-1.6976	-2.22437	-2.06585	-2.34986	-2.04	-1.74284	-0.980007	-2.99012	-3.62652	-2.88066	-2.74854	-2.87115	-3.25768	-5.43046	-4.35977	0.592065	0.193355	-0.268146	164	-3.02343	-2.76548	-3.49759	-4.10896	-4.18599	-3.19925	-4.13171	-3.22835	-3.85638	-4.83859	-3.59385	-3.65075	-2.00104	-2.40859	-2.82284	-2.74505	-3.49036	-2.89041	-4.78381	-3.40424	-4.83881	-5.68744	-3.77131	-3.33741	-2.68716	164	0.462342
165	-2.60231	-2.36985	-1.78886	-2.45429	-1.84136	-1.29806	-1.57055	-1.86998	-2.16943	-2.49133	-1.97372	-3.42649	-2.87694	-2.17839	-2.95911	-3.82575	-5.28775	-4.63235	0.247291	0.533422	0.048498	165	-4.36739	-3.13054	-2.48046	-4.31179	-3.70989	-4.89382	-4.68224	-3.38032	-3.39662	-5.11295	-3.86658	-4.18663	-2.43969	-1.62052	-1.60116	-3.669	-3.82991	-2.91748	-4.57411	-3.85262	-4.68427	-5.37475	-3.90673	-3.57967	-3.40085	165	0.478626
166	-2.46926	-2.93443	-1.32092	-1.96862	-2.4898	-1.58582	-1.76821	-2.6857	-2.1234	-1.96695	-1.77453	-3.24931	-2.49871	-2.14826	-3.40861	-2.42428	-4.94051	-4.41978	0.19411	0.180811	-0.466525	166	-4.1595	-3.17345	-2.72791	-4.04325	-4.23356	-3.55477	-3.25815	-3.86018	-4.2249	-3.83103	-4.82154	-3.99694	-1.62973	-1.18367	-1.74986	-2.34621	-3.23871	-2.9235	-5.30906	-3.06685	-4.41121	-5.05312	-4.10702	-2.99508	-2.79185	166	0.776149
167	-2.085	-2.79737	-1.30204	-2.36436	-2.08863	-1.80405	-2.33723	-2.15131	-1.61274	-1.87612	-2.30103	-3.69937	-2.32578	-2.58455	-2.48116	-3.51575	-5.32025	-4.75887	0.179238	-0.172728	0.00605629	167	-3.03441	-3.24307	-2.65094	-3.82492	-3.6482	-3.43599	-3.92907	-3.26016	-4.20315	-4.51091	-4.91202	-3.22696	-2.67358	-2.5202	-2.26893	-3.08553	-3.45504	-2.30113	-4.35612	-3.36563	-4.27396	-6.17346	-4.41921	-2.87674	-2.61567	167	0.800442
168	-2.22626	-2.7339	-1.6057	-2.06103	-1.83185	-1.83573	-1.8814	-2.11174	-1.98799	-1.95097	-2.94202	-2.28279	-2.47454	-2.70773	-3.74171	-2.70182	-4.76884	-3.06086	-0.291729	0.0544479	-0.336339	168	-2.48724	-2.30634	-2.11216	-4.65663	-4.06465	-3.15938	-3.40462	-3.63124	-3.83037	-4.43952	-3.89376	-3.41795	-1.77581	-2.477	-1.87993	-2.83257	-3.92382	-2.39327	-5.19216	-3.00894	-3.88275	-5.16855	-3.44898	-3.20557	-3.13912	168	0.534605
169	-2.0742	-3.05201	-1.51532	-2.02207	-1.85649	-2.58636	-2.21968	-2.14653	-2.18536	-2.20707	-2.80199	-3.3864	-2.13834	-2.23521	-3.32589	-2.6877	-5.2609	-5.07086	-0.348966	-0.178767	-0.141298	169	-3.56658	-3.10608	-2.55896	-3.5372	-3.60144	-3.8137	-4.11485	-3.29432	-4.44702	-4.47436	-3.91246	-3.524	-2.47473	-1.88054	-2.02662	-3.60066	-3.50401	-2.55346	-3.47979	-3.49914	-4.21452	-3.92635	-3.11733	-3.4081	-2.95318	169	0.177348
170	-2.52106	-2.86317	-1.41691	-2.55208	-1.40301	-1.99721	-1.37594	-2.53221	-1.65301	-2.00942	-2.55555	-2.3966	-2.97177	-2.54565	-2.58484	-3.50316	-4.0196	-3.99067	0.02961	0.679297	-0.296758	170	-2.58203	-3.23328	-2.57243	-4.34688	-3.61878	-2.89798	-3.12854	-3.11251	-4.24354	-4.10754	-3.56921	-3.64644	-2.31683	-1.4221	-2.86417	-2.69229	-3.41852	-2.67982	-4.07019	-2.63093	-4.29197	-4.85371	-3.56818	-2.4387	-2.80317	170	0.153036
171	-2.47261	-2.48004	-1.96438	-2.57197	-1.98402	-2.53752	-1.12909	-2.34524	-1.7747	-1.69614	-2.20824	-2.71992	-1.87354	-2.33628	-2.87602	-3.44704	-4.28701	-4.67537	0.210335	0.989632	-1.17993	171	-2.60253	-2.67667	-2.33806	-3.35233	-3.55266	-3.3431	-3.3994	-3.95599	-3.74882	-3.88134	-3.41076	-3.34681	-2.19398	-2.531	-2.29284	-2.6887	-3.33103	-2.36882	-4.21552	-3.32864	-3.94218	-5.02882	-2.67013	-2.50184	-2.57543	171	0.905704
172	-1.84759	-2.70704	-0.729665	-2.1265	-1.23399	-2.01041	-1.75123	-2.13001	-2.41635	-0.92534	-2.53342	-3.08118	-2.44516	-1.75392	-2.75363	-2.99464	-3.59889	-4.17106	0.532124	-0.48492	-0.238103	172	-3.6105	-2.85317	-2.18066	-2.85363	-4.03361	-3.60902	-3.91302	-2.69705	-3.86842	-4.59606	-3.42181	-3.48046	-2.2625	-2.02255	-2.10887	-3.66421	-3.68301	-3.05324	-4.31702	-3.45611	-5.00235	-5.40727	-3.54345	-3.16347	-3.19108	172	0.991723
173	-2.60604	-2.42125	-1.82179	-2.32873	-2.04108	-1.2369	-2.15264	-2.03435	-2.03711	-1.39884	-1.93456	-2.28193	-1.77536	-2.00372	-3.23794	-3.52644	-4.48907	-3.38912	1.00985	0.913442	-0.714976	173	-3.09297	-2.9435	-2.9338	-3.94653	-3.88404	-3.07184	-3.40823	-3.25466	-2.99743	-3.64267	-3.57261	-3.59298	-1.50097	-2.32218	-1.46541	-2.60757	-3.59311	-3.54774	-4.05914	-3.0588	-4.38347	-3.82665	-3.41858	-2.68849	-1.9926	173	0.659539
174	-2.39919	-2.48588	-1.57316	-2.04528	-1.4082	-2.01921	-1.76211	-1.95651	-1.97428	-2.55483	-2.32018	-2.77036	-2.12792	-2.79354	-2.33894	-3.22294	-5.54067	-3.97151	-0.0168106	-0.46866	0.0837866	174	-3.16398	-2.51107	-1.85624	-3.83349	-3.7244	-3.44215	-3.64297	-3.36343	-3.34691	-4.41759	-3.60192	-3.9064	-2.13846	-1.71012	-1.89857	-2.14	-3.18132	-1.71036	-4.17011	-3.74927	-4.56899	-3.8849	-3.58562	-2.77944	-2.36918	174	0.855314
175	-1.54906	-2.27134	-1.47676	-3.03651	-2.37308	-1.38254	-2.71687	-1.99304	-2.3805	-1.27479	-2.02735	-2.36771	-1.50387	-2.28441	-2.54441	-2.44298	-4.26476	-3.55433	0.589361	-1.07679	-0.772678	175	-2.97182	-3.19339	-2.05482	-3.4364	-4.09045	-2.60206	-3.76134	-2.89968	-3.47894	-3.6616	-3.80625	-2.98898	-2.06168	-1.77013	-1.01604	-2.89771	-3.29651	-2.75804	-4.2021	-3.57555	-4.21452	-3.75839	-3.32978	-4.38863	-2.23363	175	0.919465
176	-2.77823	-2.48705	-2.00576	-2.37099	-1.89194	-2.58944	-2.34289	-1.97956	-1.93932	-1.5128	-2.87733	-2.62939	-2.61214	-1.51328	-2.49464	-2.4594	-5.66749	-4.09153	0.606938	0.496256	0.80768	176	-2.72953	-2.9657	-2.5986	-3.25806	-3.74093	-2.49315	-3.65822	-2.55137	-3.47428	-3.94413	-3.75061	-2.78938	-2.85589	-2.11016	-2.09793	-3.18105	-3.70067	-1.8322	-3.44188	-3.62421	-3.59672	-4.77438	-4.29352	-2.74886	-2.59692	176	0.638001
177	-1.9076	-2.88225	-1.49122	-1.99638	-1.36757	-1.58186	-1.59319	-2.37698	-1.50875	-1.73399	-2.44659	-2.42591	-1.40717	-2.86867	-2.73155	-3.32067	-4.04822	-4.38869	-0.186719	0.164551	-0.545209	177	-2.54214	-2.5457	-1.80929	-3.03401	-3.59539	-2.86963	-3.90981	-2.35856	-3.63543	-3.16749	-3.50082	-3.40889	-1.93095	-1.86134	-1.52295	-2.71068	-3.6782	-2.55083	-3.97383	-2.30078	-4.60429	-4.7708	-4.16986	-3.22542	-2.2305	177	0.559539
178	-2.67797	-2.08562	-1.51773	-2.16421	-1.59971	-2.12921	-1.30584	-2.24915	-3.10623	-1.21634	-2.03331	-2.53196	-2.01152	-2.2581	-2.97595	-2.50597	-4.41771	-3.84932	0.304528	0.506477	0.25403	178	-2.63986	-2.78016	-2.14526	-3.59475	-3.41237	-2.45246	-3.68028	-3.46475	-3.6863	-4.48941	-4.09087	-3.24464	-1.66792	-2.26018	-1.66153	-2.67151	-3.89452	-2.1996	-4.60215	-3.54418	-4.04629	-4.13899	-2.84203	-2.78381	-2.29925	178	0.658721
179	-2.68058	-2.5182	-1.61815	-1.71542	-0.953859	-1.72969	-1.51221	-1.62257	-1.71806	-2.21632	-2.59173	-2.20433	-2.18334	-2.05139	-2.93141	-2.65563	-4.54452	-3.84932	0.381595	0.131567	-0.219028	179	-2.32803	-1.94994	-1.94745	-3.48823	-4.50729	-3.66615	-2.63098	-3.15806	-3.60631	-4.20473	-3.71747	-3.43562	-1.44702	-1.76213	-1.55375	-3.6746	-3.2929	-1.95592	-3.33525	-3.71107	-4.2682	-3.96781	-3.11652	-2.40216	-1.69142	179	0.673876
180	-2.34925	-2.32235	-1.74266	-2.25331	-3.05265	-1.86389	-1.6598	-1.9439	-1.3344	-1.89042	-2.66622	-2.16079	-2.17367	-1.7238	-3.5033	-2.61401	-3.42333	-3.35477	0.554208	0.452586	-0.0797809	180	-3.48276	-2.69812	-1.77928	-3.21398	-3.5829	-2.39656	-3.55068	-3.12783	-3.44749	-5.14779	-3.33642	-2.5389	-0.911117	-2.61021	-1.27456	-2.42614	-3.04165	-1.76225	-4.72379	-2.42343	-4.23253	-3.6083	-3.1968	-2.55664	-1.79103	180	0.76123
181	-1.76448	-1.96608	-1.46793	-2.30635	-1.70173	-1.6703	-1.34198	-1.19732	-1.77072	-1.71128	-1.48765	-2.30434	-1.73519	-2.34467	-2.55639	-2.8992	-3.91328	-4.62367	0.832281	0.414956	-0.0297092	181	-3.22839	-2.06209	-1.99556	-3.94531	-3.08704	-3.53627	-3.45758	-2.88397	-3.82765	-3.69256	-3.94941	-3.74387	-1.22534	-2.26338	-1.51039	-2.51006	-2.40591	-2.52225	-5.06973	-3.01216	-3.94002	-3.31812	-2.79663	-1.86245	-2.02503	181	0.6294
182	-2.6858	-2.53922	-1.52456	-1.75976	-1.34465	-2.08697	-2.30153	-2.0026	-2.33271	-2.16375	-1.73537	-3.20577	-1.93081	-1.86223	-2.85394	-2.39335	-4.17079	-3.362	-0.283166	0.209615	-0.713069	182	-2.63876	-2.21601	-1.75888	-3.47966	-3.10195	-2.46068	-3.0832	-2.87023	-3.5236	-3.64611	-3.14356	-3.09116	-1.57499	-1.92535	-1.54443	-2.06407	-2.9365	-2.48164	-4.40509	-2.84768	-3.7844	-4.05858	-2.8542	-2.99429	-1.73478	182	0.688026
183	-1.76858	-2.71483	-1.84067	-2.25538	-1.32347	-2.33996	-1.44081	-2.10218	-2.25572	-2.6772	-3.00502	-2.70052	-2.19412	-2.05521	-2.78208	-2.6331	-4.0952	-3.39526	0.0133854	0.814953	-0.173725	183	-2.83128	-1.93564	-2.1545	-2.96055	-3.28095	-2.81702	-2.81155	-2.98018	-3.80823	-3.73384	-4.99359	-3.61669	-1.23321	-1.36809	-1.28307	-2.53524	-3.10506	-2.65462	-3.42055	-3.89444	-4.42814	-4.29587	-2.86677	-2.87237	-2.55278	183	0.797105
184	-1.62956	-2.08172	-1.50006	-0.844368	-1.33385	-1.74201	-2.45565	-1.27863	-1.75302	-2.12002	-2.18824	-2.75182	-0.597166	-2.01821	-2.49202	-3.26608	-4.45869	-3.55541	0.318499	0.672329	0.165809	184	-3.06442	-2.27435	-1.86317	-3.34295	-3.73528	-2.85031	-3.16747	-2.72847	-4.85125	-3.73126	-3.3258	-3.89174	-0.537441	-2.63141	-2.08375	-2.43093	-2.6993	-2.13041	-3.27009	-2.99245	-3.93066	-3.10978	-3.71941	-3.11105	-1.65744	184	1.1034
185	-1.90685	-2.50223	-1.39362	-2.17208	-1.18081	-1.31522	-1.72162	-1.45995	-1.82072	-2.4291	-2.49426	-2.30262	-2.01524	-1.89579	-2.62638	-3.10497	-4.6996	-3.29368	0.0985649	0.318789	-0.31631	185	-2.75698	-2.32553	-1.78004	-3.14053	-2.84596	-2.92511	-2.60971	-1.94389	-3.18887	-3.68783	-3.38782	-3.01097	-1.66044	-2.11296	-1.24296	-2.6859	-3.21102	-2.32407	-4.36599	-1.98912	-3.74189	-4.05751	-3.43277	-2.97761	-1.97932	185	0.885897
186	-2.79127	-2.37842	-1.28718	-3.18735	-1.2543	-1.67953	-2.00592	-2.16001	-2.00791	-1.96359	-1.96265	-2.63629	-1.77164	-2.1147	-2.66718	-2.35594	-4.63213	-3.86414	-0.11506	0.587777	0.0470674	186	-4.60895	-1.99623	-0.456191	-3.13849	-3.35956	-2.33121	-2.79429	-2.41904	-3.74882	-3.77254	-2.86701	-2.76566	-1.07925	-2.54581	-2.15912	-2.76423	-2.66317	-2.02323	-3.36487	-2.28912	-4.27144	-2.9068	-2.65553	-2.38905	-3.21022	186	0.73957
187	-1.36532	-2.00229	-1.85513	-1.67771	-1.68228	-1.4877	-1.40816	-1.51865	-2.0765	-1.27647	-1.66684	-2.29831	-1.01221	-1.59451	-2.2959	-2.90607	-4.39122	-3.63892	0.79893	-0.136491	0.511542	187	-2.26178	-2.04365	-1.77273	-3.10339	-2.97053	-2.21654	-3.08842	-3.1078	-3.42419	-3.56226	-2.92606	-3.18428	-2.11681	-2.08096	-1.65667	-2.21074	-2.67441	-2.50646	-3.55522	-2.7387	-4.26351	-2.76349	-3.62616	-2.39501	-2.54028	187	0.636201
188	-1.93667	-2.69575	-0.917243	-1.72868	-1.54481	-1.69405	-2.65766	-2.40959	-0.984815	-2.16712	-1.94478	-2.20864	-1.83821	-2.58874	-2.48902	-2.36472	-4.40747	-3.79328	0.272529	0.642596	0.816741	188	-2.16882	-2.18628	-1.35903	-2.58142	-3.27087	-2.65262	-3.63133	-2.4693	-3.0914	-4.15957	-2.37424	-3.71154	-1.3663	-1.92615	-2.08497	-2.75823	-2.57287	-2.33874	-3.17373	-2.84326	-3.77864	-4.11326	-2.73621	-2.61304	-1.85471	188	0.904298
189	-1.38582	-2.16933	-0.995969	-1.96447	-1.3961	-1.38518	-1.40467	-1.88172	-1.68089	-0.314754	-1.66003	-2.54231	-2.04499	-1.97779	-2.72444	-2.84231	-4.04221	-3.9885	0.198617	0.363853	0.00128756	189	-2.29472	-2.26757	-1.70346	-3.09727	-4.07956	-2.84784	-2.94477	-3.73609	-3.77833	-4.0254	-3.05435	-3.05796	-1.53483	-2.455	-1.52741	-2.41295	-2.64632	-2.87273	-3.23376	-3.36121	-3.64499	-3.75589	-2.70905	-2.08405	-1.51954	189	0.454863
190	-2.46851	-2.24603	-1.06024	-2.26657	-1.03383	-1.6087	-0.567024	-1.93912	-1.76674	-1.40052	-2.7756	-1.39947	-1.4492	-2.25314	-2.48827	-1.85429	-4.46257	-3.35043	0.218447	1.11553	-0.818458	190	-3.34075	-1.99322	-2.06598	-2.8724	-3.87558	-1.62552	-3.06635	-2.36445	-4.11423	-3.43798	-3.53565	-3.54814	-2.07192	-1.31009	-1.60359	-1.95057	-3.44421	-2.32746	-3.2693	-2.39005	-3.56358	-3.74481	-2.64053	-2.55148	-2.14104	190	0.805221
191	-1.95605	-2.1557	-1.09438	-2.09874	-1.36757	-1.55326	-1.12996	-1.55604	-1.06801	-1.88705	-1.81368	-2.1401	-1.91036	-1.77337	-3.18666	-2.27348	-2.91501	-4.0937	0.846703	-0.0821364	-0.366382	191	-2.87776	-1.96461	-1.30592	-3.08298	-3.51275	-1.9835	-2.85087	-2.55451	-3.68125	-3.85296	-3.25231	-2.96441	-1.61673	-1.92255	-2.00312	-1.99134	-2.76913	-2.88401	-3.45017	-2.99848	-4.62375	-3.90277	-3.18666	-2.37674	-1.99651	191	0.647518
192	-1.88896	-2.10002	-1.06546	-1.58447	-0.457152	-1.3271	-0.783402	-2.45351	-1.41361	-1.79244	-2.12397	-2.12371	-1.72627	-2.67303	-2.33482	-2.33074	-5.41845	-3.4437	0.256305	0.306246	-1.0445	192	-1.6619	-2.22994	-1.04846	-2.86914	-2.21384	-3.38256	-3.34603	-2.1956	-3.02888	-3.14298	-3.27355	-2.94673	-1.53719	-2.41459	-2.69561	-2.6859	-3.25035	-2.40643	-3.5959	-2.70533	-3.48829	-3.74803	-2.82947	-2.04235	-2.6977	192	0.886477
193	-2.33173	-1.80489	-1.14338	-1.74443	-0.757165	-1.42478	-1.03592	-2.08044	-1.85082	-2.51951	-1.95159	-2.31641	-2.4883	-1.62731	-2.06722	-1.9024	-3.68473	-3.27524	0.478493	-0.150893	-0.160372	193	-2.74124	-1.8965	-1.69769	-2.42675	-2.2864	-1.9124	-2.74734	-2.31419	-3.10538	-3.52356	-3.70643	-2.53415	-1.19817	-2.17817	-1.9083	-1.96856	-2.53153	-2.06008	-3.83996	-3.20237	-3.21379	-3.17339	-3.23045	-1.69168	-3.84383	193	0.686391
194	-1.69516	-1.76634	-1.15904	-1.91889	-2.02033	-1.61618	-1.53137	-1.88172	-2.02207	-1.62423	-2.43765	-2.59016	-1.50982	-1.64943	-2.02006	-2.85148	-3.14356	-3.55649	0.688512	0.0363295	0.563998	194	-2.44661	-2.09709	-1.48333	-3.39477	-2.21303	-2.2486	-2.62777	-2.15987	-3.47428	-3.0531	-3.0004	-3.6805	-1.79392	-1.76493	-1.55496	-2.13161	-2.44444	-1.4772	-3.49164	-2.08885	-2.88202	-4.13148	-2.81933	-2.11026	-2.71489	194	0.37854
195	-1.85766	-1.76361	-2.02785	-2.20441	-1.22923	-1.31258	-1.44342	-1.5043	-0.929058	-2.17847	-2.50703	-2.09224	-1.57565	-1.69748	-2.38947	-1.52979	-2.97824	-3.26656	1.10224	0.420066	-0.571914	195	-3.19801	-1.70569	-1.74233	-2.48307	-2.90965	-2.14009	-2.58603	-2.0774	-3.44283	-3.87274	-2.53736	-3.32181	-1.29464	-1.87214	-1.00916	-2.11642	-2.92405	-1.47457	-2.904	-3.1155	-2.82618	-3.08405	-2.43984	-2.37833	-2.28206	195	0.737173
196	-2.10848	-2.62449	-0.963032	-1.33211	-2.24296	-2.08213	-1.41295	-1.85563	-1.49636	-1.36856	-1.75835	-2.07155	-1.59015	-1.88893	-2.44673	-2.49872	-2.46568	-3.28825	0.613698	1.116	-0.301527	196	-2.47516	-1.87354	-1.89781	-2.63162	-3.14791	-2.56507	-2.82278	-1.54375	-3.82493	-3.38207	-3.01782	-2.29187	-0.62013	-1.84694	-0.441873	-2.51006	-2.788	-1.31249	-3.868	-2.81551	-3.30853	-3.62367	-2.82784	-2.12297	-2.63325	196	0.551276
197	-1.55912	-1.64603	-1.5591	-1.30227	-1.0896	-1.2677	-1.27972	-1.33168	-1.94419	-1.67427	-1.7907	-1.67408	-1.84081	-1.42633	-2.54591	-2.51628	-3.50316	-3.12955	0.103522	0.0855742	-0.126514	197	-2.64059	-1.6895	-1.56992	-2.53163	-3.19064	-2.35669	-2.57881	-2.6358	-3.11858	-3.81125	-2.76591	-2.95967	-1.2084	-1.67252	-2.04404	-2.02491	-2.71053	-2.46171	-3.25666	-3.16859	-1.94433	-2.91573	-2.55701	-2.31042	-1.41016	197	0.852044
198	-2.9288	-1.59113	-1.29963	-2.09998	-0.976771	-1.75609	-1.15869	-1.98043	-1.0388	-1.32104	-1.63875	-1.3874	-1.56932	-1.55981	-2.76299	-2.05167	-3.96238	-3.13787	0.62812	0.409381	0.364188	198	-2.41367	-2.19306	-2.25263	-2.44675	-2.47628	-1.93336	-2.75015	-2.1151	-3.06926	-3.60096	-3.24551	-2.74454	-1.34976	-1.4133	-1.46663	-2.51126	-2.46571	-2.26165	-3.3005	-3.07489	-2.23035	-2.91823	-2.50511	-1.80884	-2.54614	198	0.552797
199	-0.681037	-1.29988	-1.7262	-2.79409	-0.688862	-1.46966	-1.45953	-1.27602	-1.98313	-1.22559	-1.60257	-1.82971	-0.97688	-1.99991	-2.26371	-2.24103	-3.53354	-3.33417	1.03329	-0.165295	0.588795	199	-2.71782	-2.17612	-1.96631	-3.50823	-2.24488	-1.39782	-2.82679	-2.42689	-3.63233	-2.71466	-2.96811	-3.32353	-0.926868	-1.59851	-1.27943	-2.27867	-2.57247	-2.00668	-2.61808	-2.91363	-3.26747	-3.83987	-2.12805	-2.11384	-2.57231	199	0.597255
200	-1.2632	-2.30405	-1.54665	-2.30096	-1.09997	-1.55502	-1.47303	-1.52561	-1.14014	-1.26806	-1.85327	-1.69693	-1.67941	-1.53349	-2.48827	-2.13757	-2.74757	-3.67435	-0.381866	-0.174586	-0.582405	200	-2.65157	-1.46332	-1.705	-2.3333	-2.58755	-1.21534	-2.37497	-2.22819	-3.59078	-4.65927	-2.60236	-3.01873	-1.5179	-1.37969	-2.05336	-1.89862	-2.44564	-1.36589	-2.96324	-2.81431	-3.69506	-3.53433	-2.34375	-1.75721	-2.43519	200	0.448977
201	-1.23711	-2.99867	-2.00736	-2.50981	-1.27289	-1.16299	-0.139927	-1.82607	-0.440523	-1.95097	-1.26846	-1.53958	-1.76978	-1.76231	-2.10202	-1.72106	-3.88502	-2.3881	0.197716	0.201253	-0.180878	201	-2.26947	-2.92882	-1.91859	-2.60142	-2.76332	-1.52359	-2.1627	-2.51838	-3.2774	-3.87833	-2.85512	-4.1849	-0.565398	-1.70492	-1.63276	-2.54083	-2.51949	-1.67012	-3.4087	-2.17571	-2.87985	-3.86703	-2.55904	-1.62139	-1.83596	201	0.68771
202	-1.51626	-1.65732	-1.7278	-2.26781	-0.742899	-1.16607	-0.860027	-1.84303	-1.82117	-1.26806	-1.46084	-1.96033	-1.85941	-1.44578	-1.54698	-1.46985	-3.08033	-2.51571	-0.363388	0.0957948	-0.0335242	202	-2.04987	-2.37935	-1.02152	-2.20229	-2.08483	-1.57168	-2.23252	-2.36328	-2.97024	-3.21522	-2.74807	-2.7204	-1.6691	-1.90054	-1.08736	-1.89223	-2.76873	-1.07746	-3.22941	-2.23483	-3.3269	-3.09513	-2.94177	-2.27468	-2.35433	202	0.727732
203	-1.88337	-1.24187	-0.790316	-1.79996	-1.08484	-1.82341	-1.19265	-1.89477	-1.05385	-1.48504	-1.35699	-2.37461	-1.17362	-1.03085	-2.15105	-2.28837	-4.0687	-3.31067	0.598826	-0.30606	-0.1227	203	-2.65743	-2.05494	-1.78774	-1.74767	-2.83507	-1.38015	-2.15467	-1.96784	-3.12596	-2.84668	-2.42734	-2.71522	-1.33598	-1.36289	-1.74824	-1.13132	-2.62866	-1.72089	-3.18242	-3.05277	-2.95514	-3.1398	-2.55498	-2.02011	-1.43047	203	0.728801
204	-1.59266	-2.25694	-0.912824	-1.24757	-1.40215	-1.42082	-2.29631	-3.24271	-0.759575	-1.16251	-2.0282	-2.27201	-1.55631	-1.39124	-1.9089	-2.43115	-3.50104	-3.16896	0.939994	0.620297	0.0909397	204	-1.69375	-1.95709	-2.0325	-1.77297	-2.75485	-1.87459	-2.05396	-2.35974	-2.97684	-2.60501	-2.9953	-2.31213	-1.32496	-1.65492	-1.17975	-2.26988	-2.42156	-1.86379	-2.80606	-1.85441	-3.11437	-3.96424	-1.98371	-1.62139	-2.04143	204	0.360415
205	-1.28332	-1.22707	-1.04296	-2.77627	-0.739441	-1.10139	-1.65762	-2.24436	-0.853831	-1.58218	-1.23824	-2.04094	-1.33279	-1.5415	-2.82362	-1.83482	-3.13967	-2.54029	0.889518	0.269545	0.239724	205	-2.25739	-2.15618	-1.8928	-2.33697	-2.53393	-2.09242	-1.07808	-3.35087	-4.21597	-2.645	-2.9885	-2.50311	-0.741408	-1.60051	-1.31346	-1.55374	-2.50625	-1.9138	-2.80606	-3.1907	-2.66011	-2.42972	-1.95857	-1.79454	-1.78439	205	0.540728
206	-1.61316	-0.897674	-1.26227	-1.80079	-0.716529	-1.02395	-1.67678	-1.26167	-1.4114	-1.3059	-1.88349	-2.50868	-1.73333	-0.673119	-1.97589	-1.3244	-3.22728	-3.23222	0.420354	0.12785	-0.789845	206	-2.24751	-1.52316	-1.9209	-2.15903	-2.21464	-2.02131	-2.64903	-2.19324	-2.73026	-2.72241	-3.1151	-2.83119	-1.24542	-1.39209	-1.81227	-1.7004	-1.94917	-1.55166	-3.91973	-2.06794	-3.00449	-3.02222	-2.5493	-2.30049	-2.06643	206	0.423559
207	-2.36937	-1.21929	-1.0285	-1.63544	-1.09133	-1.64918	-1.1822	-2.35394	-1.03128	-1.7466	-1.6728	-1.30377	-1.36478	-0.863042	-1.68808	-2.02609	-3.29051	-2.92458	0.00752645	0.932489	-0.565715	207	-1.94922	-1.41063	-1.33017	-2.50919	-2.29971	-1.46564	-2.50658	-1.42948	-2.54698	-2.80239	-2.7247	-2.47078	-1.86913	-1.4429	-1.33008	-2.01891	-2.60297	-1.66749	-3.37	-2.42142	-2.10787	-2.39362	-2.09521	-1.52925	-1.48282	207	0.267786
208	-2.07867	-1.59502	-1.0988	-2.10537	-0.826332	-0.836072	-1.08337	-1.15471	-1.56274	-1.53551	-1.55831	-1.74047	-1.13457	-1.5476	-1.85089	-1.90965	-3.04783	-3.04134	-0.0334859	0.768031	0.256892	208	-2.28118	-1.19724	-2.08715	-2.24351	-2.21303	-2.18572	-2.45923	-2.13631	-2.39281	-3.65127	-2.78375	-2.57339	-1.16194	-1.59651	-1.37343	-1.46502	-1.80508	-1.60506	-3.5027	-1.59382	-2.91624	-3.26202	-1.87221	-1.60947	-1.6547	208	0.434505
209	-1.99816	-1.17334	-1.38558	-2.05854	-1.03081	-1.40058	-1.2954	-1.62257	-1.53176	-1.76973	-1.10033	-2.14872	-2.21829	-1.01216	-1.82619	-1.55842	-2.32085	-2.86782	0.045384	0.945962	0.351313	209	-1.89871	-1.42343	-1.48295	-2.09945	-2.0941	-1.74553	-2.53668	-2.11824	-3.20556	-3.41906	-2.97321	-2.0513	-1.63012	-0.785236	-1.25633	-1.90661	-2.40149	-1.7961	-3.08487	-1.94489	-2.55744	-2.55944	-2.29712	-1.77071	-1.584	209	0.327029
210	-1.53191	-2.28224	-1.21608	-1.71874	-1.38356	-1.80713	-0.195655	-1.24037	-2.63097	-1.57966	-1.60172	-1.73788	-1.53585	-1.41412	-1.13079	-2.1914	-2.80656	-3.07135	0.59522	0.346664	-0.242395	210	-2.56593	-1.31014	-1.27436	-2.44185	-1.58212	-1.37316	-2.259	-2.27257	-2.84559	-3.81512	-2.70771	-3.02477	-1.51081	-1.20728	-1.67895	-2.2507	-2.33808	-1.87507	-3.01497	-2.25212	-2.74729	-3.0526	-1.85316	-2.11066	-1.88947	210	0.280458
211	-1.29525	-2.31417	-1.25263	-0.504565	-1.46959	-1.12295	-0.615785	-1.55691	-1.62469	-0.929545	-2.01713	-2.3121	-2.02788	-1.13038	-1.98076	-2.1223	-3.01109	-2.27241	-0.485974	-0.248918	0.621223	211	-1.11473	-1.55929	-1.6188	-2.31003	-2.77823	-1.86678	-2.21848	-1.89206	-2.39281	-3.21092	-2.10618	-3.61066	-0.874104	-1.15327	-1.22189	-1.13412	-2.00817	-2.09618	-3.00036	-2.03899	-2.21306	-1.93012	-2.14265	-2.44624	-1.98909	211	0.571574
212	-1.54198	-0.979829	-0.753765	-1.7378	-0.372854	-0.660515	-0.937958	-1.59822	-0.984815	-0.99094	-0.695986	-1.81419	-2.06321	-1.69138	-2.15779	-1.84475	-3.30711	-2.77202	-0.143904	-0.0579786	1.11574	212	-1.61981	-2.10273	-1.41021	-2.12802	-2.8387	-1.7817	-2.08726	-1.84965	-2.82268	-2.99204	-2.54756	-2.59839	-0.755977	-1.35609	-1.95733	-1.39149	-2.97663	-1.50353	-2.78829	-1.8721	-1.60823	-2.52263	-2.49011	-1.53005	-1.47852	212	0.336354
213	-1.9445	-2.43838	-0.877478	-2.01089	-0.912359	-1.62322	-0.973658	-1.44777	-1.25121	-1.63012	-0.931358	-1.00243	-1.69094	-1.0972	-1.5597	-1.85429	-2.96199	-2.88264	-0.348064	-0.385967	0.399	213	-1.85003	-1.42832	-1.11081	-2.26024	-2.45209	-1.27575	-2.35129	-1.25788	-2.71162	-2.72241	-2.92181	-2.55787	-1.25723	-0.662024	-1.66801	-1.46662	-2.20322	-1.01165	-3.55088	-2.55573	-2.06573	-2.7467	-2.04737	-1.80804	-1.5211	213	-0.0240033
214	-2.48268	-1.46225	-1.31971	-1.44441	-0.725607	-1.89909	-0.975835	-0.589441	-0.941006	-0.943001	-1.69323	-1.40982	-0.589356	-1.58574	-2.09267	-1.77985	-2.29824	-2.76696	0.174731	0.0902199	-0.0287555	214	-1.58944	-1.16299	-1.43253	-2.52184	-1.93607	-1.63045	-2.2249	-1.6482	-2.46271	-1.7987	-2.56965	-2.03406	-1.24936	-1.4093	-1.40018	-1.42585	-1.56026	-1.20983	-3.09356	-2.14555	-2.07473	-3.27417	-1.79924	-1.40733	-1.72736	214	0.0169018
215	-1.62024	-1.80294	-0.644512	-1.98561	-1.59625	-1.02131	-0.560929	-0.455952	-1.49061	-1.60237	-1.35613	-1.75685	-1.74077	-1.48315	-2.00434	-1.60996	-5.4347	-3.34935	0.695272	-0.361809	-0.168956	215	-2.06451	-2.05343	-1.4764	-2.05619	-1.22857	-1.01395	-1.47814	-24.9193	-3.09645	-2.86002	-1.98384	-2.32592	-1.14422	-1.88614	-1.4095	-1.38549	-2.54036	-1.51744	-2.89373	-1.80494	-2.26782	-2.61233	-1.54583	-2.04156	-1.50313	215	0.0844195
216	-1.69963	-1.0616	-1.48198	-2.17664	-0.0451748	-1.35086	-1.29888	-0.907294	-1.64549	-0.60617	-2.37338	-1.91592	-1.83189	-1.35425	-1.85051	-1.62409	-2.48405	-3.90499	0.551504	0.516233	-0.155604	216	-4.01969	-1.53219	-1.06616	-1.94233	-2.25375	-1.74142	-1.65189	-1.48995	-2.2837	-2.39601	-1.95325	-1.94525	-0.818978	-1.27448	-1.06305	-2.10883	-2.83656	-0.654028	-3.25311	-1.4016	-1.79663	-2.7131	-2.11062	-1.42957	-1.884	216	0.335371
217	-1.11449	-0.580344	-1.13695	-0.976559	-0.932677	-0.561957	0.0511994	-2.37003	-0.681693	-0.883709	-1.38806	-1.82108	-0.768242	-1.96482	-1.7023	-2.18491	-4.34035	-2.84287	-0.94342	0.0535187	-0.221889	217	-1.37166	-2.19607	-0.713265	-1.87091	-2.30898	-1.67361	-1.26988	-1.71771	-2.19866	-3.18125	-1.33729	-1.9224	-0.761883	-0.576016	-1.08939	-2.23391	-2.28911	-1.26586	-2.53356	-2.38201	-3.02611	-3.24522	-1.64314	-2.57968	-0.803502	217	0.175758
218	-0.766759	-1.39567	-1.1486	-0.926832	-0.6733	-1.82517	-0.307544	-1.76171	-0.626821	-1.25797	-1.22334	-1.76116	-1.90292	-2.02432	-1.34113	-1.52444	-1.82242	-2.91698	1.27485	0.433539	0.374679	218	-1.70363	-1.32369	-2.13448	-2.15046	-1.63574	-0.79447	-1.50342	-1.74087	-2.35359	-2.82991	-2.03864	-2.11166	-0.197234	-0.355194	-1.8382	-1.5925	-1.94034	-1.3501	-2.66389	-2.86497	-2.65435	-1.35548	-1.80653	-2.51018	-1.57071	218	0.319951
219	-1.69665	-1.6616	-0.926481	-1.99555	-0.747654	-1.68525	-0.767294	-1.53604	-1.64593	-1.37781	-1.63066	-1.71158	-1.47188	-1.32793	-1.25654	-1.49963	-3.4092	-1.82053	0.45731	0.22634	0.927376	219	-1.50452	-0.722288	-1.68268	-2.47572	-2.40372	-1.58319	-2.02707	-1.64624	-2.83161	-2.16465	-1.99404	-2.07674	-1.14225	-1.05286	-0.952832	-1.86146	-2.03145	-1.0722	-3.06631	-1.85803	-2.03366	-2.21673	-1.86573	-2.67181	-0.464038	219	0.261613
220	-2.21769	-1.303	-1.06506	-2.2475	-0.998385	-0.960589	-1.25142	-1.7665	-1.01712	-1.66334	-1.34805	-1.2197	-1.56598	-1.06059	-1.8086	-1.99937	-2.14705	-2.25181	-0.498593	0.0219278	0.818648	220	-1.32408	-1.58751	-2.21876	-2.59897	-1.48375	-0.985175	-0.85618	-1.34348	-2.19089	-3.17953	-1.96515	-2.26169	-0.381512	-1.31689	-0.64731	-1.63007	-2.02703	-1.25458	-1.81995	-1.48726	-2.71271	-2.49904	-1.75383	-1.65038	-1.97034	220	0.582771
221	-0.614324	-1.28353	-1.01324	-2.49987	-1.22404	-0.641595	-0.925333	-1.88346	-1.11536	-1.29918	-1.16971	-1.45508	-1.08101	-1.17767	-1.39914	-1.39121	-2.08806	-1.8809	0.45055	-0.205713	-0.382595	221	-1.59932	-1.04407	-1.55414	-1.44485	-1.64501	-1.36165	-2.11334	-0.992424	-2.65493	-2.52244	-2.22386	-1.36669	-1.56751	-1.28488	-1.45609	-1.65844	-1.92308	-1.50879	-2.50158	-2.945	-2.03222	-2.55301	-2.0129	-2.35768	-1.93205	221	0.260506
222	-1.09734	-1.31663	-1.52657	-1.40338	-0.875181	-1.02483	-1.0751	-0.647272	-1.53663	-0.505667	-1.43573	-1.76289	-1.86871	-1.76498	-1.474	-1.17971	-1.9941	-2.15311	0.5817	0.215654	0.0337149	222	-1.66081	-0.818633	-1.62303	-1.75583	-1.39305	-0.449227	-1.12222	-0.665713	-2.44135	-2.72327	-2.17755	-2.97907	-1.22967	-1.38289	-1.49337	-1.1561	-1.95479	-1.27752	-2.38902	-2.41217	-2.50017	-2.17527	-1.30095	-1.69009	-1.18086	222	0.278659
223	-1.22704	-1.89444	-0.980304	-1.14978	-1.54999	-0.447119	-1.91536	-1.2308	-1.0419	-1.86351	-2.50533	-1.32662	-1.18998	-0.995378	-1.24419	-0.735326	-0.901515	-2.1542	-0.099286	-0.307918	0.234479	223	-1.44779	-1.0802	-1.5426	-2.16067	-1.58575	-1.15821	-1.78832	-1.09334	-2.11361	-2.56673	-2.0106	-1.23692	-0.435064	-1.4021	-1.5501	-1.96017	-2.33246	-1.5543	-2.49881	-2.58227	-2.29664	-2.23031	-1.54583	-1.82869	-1.57814	223	0.26217
224	-1.38246	-1.03317	-1.11526	-1.08679	-0.973312	-1.35834	-0.862639	-0.889032	-0.750725	-1.86939	-0.800691	-1.60985	-0.88316	-1.62388	-1.49795	-0.972787	-1.6511	-2.07828	0.160759	0.586383	-0.597665	224	-1.13559	-1.86977	-1.4283	-1.71706	-1.7595	-0.796114	-2.53788	-0.875012	-2.47863	-1.85546	-2.31434	-1.38479	-0.612649	-0.887646	-1.12585	-1.80471	-1.99573	-1.71299	-3.25508	-1.89744	-1.87588	-2.85641	-1.31676	-1.80447	-1.00234	224	0.374412
225	-1.02802	-0.894559	-1.26107	-1.47673	-0.84665	-1.02483	-1.14258	-1.81259	-0.770638	-1.08808	-1.67408	-1.07529	-1.22717	-1.50756	-1.5728	-1.16062	-1.7327	-2.27133	0.597023	-0.0918924	0.407584	225	-1.59676	-1.98456	-1.42176	-1.41751	-1.5539	-0.994628	-1.20327	-1.32699	-2.39165	-1.79526	-2.06625	-2.06337	-0.455145	-0.813638	-1.21986	-1.40188	-1.64213	-1.78068	-2.74406	-1.91352	-1.92956	-2.88214	-1.42096	-1.48676	-1.42071	225	0.355295
226	-0.372441	-1.81774	-1.14579	-1.139	-0.514647	-0.378041	-0.00888152	-1.84129	-1.4884	-1.43753	-0.825803	-1.23781	-1.74077	-0.951902	-1.68808	-0.429529	-1.13254	-2.93434	0.268924	-0.429172	0.074726	226	-1.34165	-1.22509	-2.01287	-1.38609	-1.14149	-0.820774	-1.94602	-0.985748	-2.68871	-2.9787	-1.8513	-1.36669	-0.149983	-1.97935	-1.53349	-1.41067	-2.07439	-1.59566	-3.6109	-1.61594	-1.48791	-1.968	-1.28189	-0.881921	-1.25273	226	0.360224
227	-0.795829	-1.89872	-1.15704	-0.928904	-0.687998	-1.49958	-0.766423	-1.50734	-0.864894	-0.849227	-1.64897	-1.54992	-0.678241	-1.47629	-1.47138	-1.18047	-1.87576	-1.59639	0.698878	-0.0129151	-0.184216	227	-1.87858	-1.34477	-1.04192	-1.00206	-2.48071	-1.44427	-1.47252	-1.58341	-2.49222	-2.71638	-1.51103	-1.48395	-0.84221	-1.53131	-1.43381	-1.31875	-2.05553	-0.814602	-2.52843	-1.95534	-1.47422	-2.20458	-1.27216	-1.81877	-0.490992	227	0.0381223
228	-1.63739	-1.60709	-1.53701	-1.33542	-0.937864	-1.13879	-1.02851	-0.393772	-1.00517	-1.0435	-0.836018	-0.343714	-1.42242	-1.26539	-0.832119	-0.957135	-2.82705	-2.52655	0.914756	0.0623456	-0.44602	228	-1.85113	-1.53257	-1.91936	-1.24243	-1.79054	-1.29836	-1.96086	-1.60658	-2.30001	-2.32893	-1.50084	-1.48999	-1.1139	-1.53451	-0.591797	-1.83988	-1.37243	-1.61559	-2.02214	-1.16153	-1.55095	-1.86401	-1.73315	-1.08327	-0.594511	228	0.238046
229	-1.92735	-1.07795	-0.806383	-1.9164	-0.472715	-1.61926	0.0808044	-0.881205	-1.20519	-1.18774	-1.42126	-0.794641	-0.973533	-0.864186	-0.954506	-1.12855	-2.15553	-1.95573	-1.4261	0.424712	0.0613736	229	-1.36142	-1.42267	-1.89049	-0.62946	-1.0794	-0.88489	-3.07237	-1.17502	-2.03013	-2.07736	-1.84238	-2.00948	-0.6977	-0.778435	-0.965799	-1.95897	-1.95077	-1.38169	-2.39337	-1.97746	-1.92487	-1.73714	-1.90424	-1.5225	-1.6672	229	0.337576
230	-1.16555	-0.681578	-0.524414	-1.66777	-0.294177	-1.49958	0.197483	-1.96695	-1.20828	-1.30843	-2.10779	-1.19341	-1.11077	-1.40154	-0.933547	-0.242844	-0.53626	-1.58988	0.861124	0.0604873	0.386124	230	-1.41376	-1.09638	-1.20317	-1.05389	-1.20438	-1.49605	-1.83928	-0.674352	-2.54814	-1.93846	-1.14018	-1.88403	-1.16352	-1.30569	-0.499817	-1.63846	-1.63652	-0.965399	-2.28516	-1.51501	-1.38164	-1.63994	-1.11444	-1.9522	-1.23906	230	0.321663
231	-0.72688	-1.25044	-1.28195	-1.96323	-0.0780293	-1.46878	-0.241368	-1.45343	-0.747628	-1.5128	-0.92923	-0.265254	-1.00477	-1.12276	-1.08213	-1.72755	-1.53453	-1.82595	0.66778	-0.542063	-0.449358	231	-1.7933	-0.815622	-0.91877	-1.38772	-1.43094	-0.322227	-1.82564	-0.664928	-1.93305	-2.62694	-2.38656	-1.43049	-1.18675	-0.93005	-0.994568	-1.97415	-1.5735	-1.59829	-2.18367	-1.32278	-2.33662	-1.31831	-0.839957	-1.21512	-1.64259	231	-0.330508
232	-0.9546	-0.923372	-1.0755	-0.954597	-0.140712	-0.209084	-0.664111	-1.62127	-0.847636	-0.353442	-1.76261	-1.40033	-1.10891	-1.90685	-2.21618	-0.783429	-3.54166	-2.06418	0.528969	0.457232	0.404246	232	-1.53454	-0.86229	-1.09426	-1.43016	-1.46198	-0.585269	-1.77347	-0.741501	-2.63124	-1.54326	-1.71834	-1.75168	-0.868198	-0.773235	-1.09546	-1.87384	-1.79545	-1.5291	-2.78552	-1.66581	-1.55419	-2.18528	-1.41528	-1.14641	-0.806627	232	-0.127012
233	-1.07014	-1.15738	-1.71415	-1.33791	-0.0611697	-1.25142	-1.06552	-1.42951	-0.596288	-1.23231	-1.00797	-1.85428	-0.992128	-1.50298	-1.28312	-1.73365	-2.09831	-2.30893	0.802986	-0.0844592	0.773822	233	-1.65971	-0.650782	-0.548938	-1.4122	-1.13463	-1.00696	-1.65269	-1.43969	-2.2736	-2.61963	-1.93159	-1.36927	-0.788659	-0.349594	-0.792372	-1.8167	-2.12737	-0.596116	-1.86971	-0.713147	-2.60644	-1.9705	-1.65044	-0.994707	-0.964054	233	0.0652317
234	-1.26767	-1.74181	-0.619609	-1.0698	-0.274291	-0.723874	-0.595758	-2.03435	-0.693641	-1.66923	-1.2625	-1.15978	-0.152369	-0.390905	-1.28836	-1.06365	-2.20039	-1.322	0.47669	0.252356	-0.37115	234	-0.919653	-1.58676	-1.42099	-1.59503	-1.43941	-1.24411	-1.64788	-1.28536	-2.22623	-2.08639	-1.74085	-1.73529	-0.162583	-1.16447	-0.20564	-1.36111	-1.94315	-0.826636	-1.75044	-1.77478	-1.59994	-1.98158	-1.39298	-2.21153	-0.647638	234	0.234292
235	-1.23897	-1.41553	-0.762601	-1.67233	-0.526751	-0.694394	-0.210022	-1.16558	-1.40653	-1.11583	-1.3489	-1.60467	-1.03936	-0.482815	-0.475438	-0.606288	-2.31873	-1.86246	0.356357	0.224946	-0.189939	235	-1.50086	-1.1453	-0.862583	-1.64564	-0.735124	-0.956816	-2.04714	-0.726186	-2.57455	-1.82063	-2.26464	-1.39773	-1.1332	-0.989255	-0.875439	-1.56613	-1.29978	-0.779629	-2.43878	-1.47922	-1.76241	-1.96014	-1.62489	-1.79136	-0.540603	235	0.140512
236	-1.7287	-1.2664	-0.809596	-1.1879	-0.739441	-1.27342	-0.769035	-1.13079	-0.692756	-0.89296	-0.558083	-0.644188	-1.47002	-1.1567	-0.570129	-0.353175	-1.37734	-2.01574	0.928277	-0.0756324	-0.355891	236	-1.36142	-1.5431	-1.16045	-1.12327	-0.440429	-0.724188	-1.93679	-0.990461	-1.65579	-2.36075	-2.0089	-2.00388	-0.695732	-1.31369	-0.367316	-1.11894	-1.84321	-0.821371	-2.38823	-1.63082	-2.01853	-2.56516	-1.57948	-1.77627	-0.944522	236	0.0297502
237	-1.1566	-1.68029	-0.731272	-1.35656	-0.221551	-1.16783	-0.135574	-1.56691	-1.43928	-0.227708	-0.897308	-0.817058	-1.51279	-1.21276	-1.20751	-0.866655	-1.88601	-2.14878	0.0345676	0.171985	0.547784	237	-1.35959	-0.769708	-1.31439	-1.18285	-2.06468	-1.97939	-1.00304	-1.58577	-2.68832	-1.52649	-1.62233	-1.51542	-0.754795	-1.37809	-1.11694	-1.84907	-1.41577	-1.24669	-1.11541	-1.60549	-1.69036	-2.20672	-1.4169	-1.76158	-1.11328	237	0.0628523
238	-1.26394	-1.13012	-1.10562	-0.875447	-0.505569	-1.38826	0.451739	-0.795111	-0.690543	-0.828201	-0.658531	-1.6064	-0.734027	-0.977072	-0.589965	-0.695241	-1.38546	-1.94091	-0.261533	-0.358092	0.388986	238	-0.80363	-1.24203	-1.42753	-1.59299	-1.53455	-0.907084	-1.55438	-0.573825	-2.12449	-1.44736	-2.67755	-1.58613	-0.846935	-1.04486	-0.919606	-1.86905	-1.75291	-1.41403	-1.88313	-1.40361	-1.98647	-2.45437	-1.54583	-1.89343	-1.81447	238	0.100616
239	-1.35153	-0.965812	-1.04216	-1.45435	-0.290286	-0.656995	-0.445992	-1.11862	-0.767983	-0.503985	-1.34677	-1.41973	-0.0233184	-0.815371	-0.898365	-1.30073	-2.46568	-2.18746	0.183294	-0.488172	-0.0826421	239	-1.71388	-1.65638	-0.955715	-0.335217	-0.993536	-0.252767	-2.10411	-1.46364	-2.17652	-2.02833	-2.288	-1.53008	-0.930805	-0.919649	-0.86693	-1.54335	-0.87234	-0.736384	-2.36612	-1.78604	-2.59059	-1.85722	-1.56002	-0.998679	-0.847644	239	-0.0581349
240	-1.24195	-0.856791	-0.729263	-0.984433	-0.271697	-1.40058	-0.96321	-0.444646	-0.76046	-0.272282	-0.470404	-1.82022	-0.851548	-1.5701	-1.14202	-1.09457	-1.90226	-0.970978	0.162112	-0.68097	-0.487984	240	-1.59676	-0.744493	-1.28937	-1.42853	-0.509366	-1.49975	-1.61176	-0.993209	-1.99518	-2.20465	-1.98129	-1.49904	-1.12099	-1.14127	-1.10114	-1.35152	-1.58193	-1.08724	-2.60623	-2.03175	-1.23647	-2.36789	-1.34798	-1.6893	-0.847253	240	0.0677209
241	-1.27624	-1.68535	-1.76355	-0.467684	0.0871074	-0.754673	-1.14519	-0.782501	-1.11093	-0.948048	-0.752169	-0.950267	-0.613158	-0.984318	-1.08962	-0.832678	-2.04921	-2.05334	1.12342	-0.151822	-0.16991	241	-0.3432	-0.953742	-0.66439	-1.41751	-1.14471	-0.334968	-1.00104	-1.2139	-1.84917	-1.74881	-1.59429	-1.6758	-0.50594	-0.797237	-0.576805	-0.614997	-1.57872	-0.250149	-2.17932	-1.60428	-0.869389	-1.854	-2.28698	-1.25999	-0.511305	241	-0.373644
242	-0.877078	-0.953742	-0.113912	-1.55008	-0.106993	-1.59154	-0.0724453	-1.03513	0.637884	-0.922817	-1.05011	-0.610563	-0.414561	-0.616295	-1.14988	-0.846421	-2.18591	-1.4366	-0.561689	-0.0979318	-0.574775	242	-1.09716	-1.15584	-0.695947	-1.28488	-2.2223	-1.67607	-1.45808	-0.922919	-2.14507	-2.47041	-2.04204	-1.65467	-0.80559	-0.902447	-0.97755	-1.35832	-1.8388	-0.89959	-1.83693	-1.95092	-1.0124	-2.18671	-1.2377	-1.01099	-1.4043	242	0.359742
243	-1.62323	-1.93493	-1.18475	-0.817847	-0.316224	-0.643355	0.515302	-0.694232	-0.588765	-0.695319	-0.938594	-1.59519	-0.467743	-0.951902	-1.23184	-0.990348	-2.57801	-1.2262	0.812901	-0.22476	0.0575586	243	-0.801434	-1.06251	-1.12389	-0.941252	-1.49544	-0.893521	-1.46129	-0.36217	-1.88606	-2.07134	-0.808829	-0.617835	-0.387025	-0.946851	-0.309777	-1.47341	-1.74689	-1.35461	-1.79191	-1.49088	-1.72134	-1.72392	-0.454786	-1.32711	-0.943741	243	0.134788
244	-0.608361	-1.19008	-1.03533	-1.26995	-0.447209	-0.843991	-0.958421	-0.958168	-0.81666	-0.881186	-0.695986	-0.832147	-1.01853	-0.916434	-0.908096	-0.792974	-2.02059	-1.02159	0.422157	0.139465	-0.127945	244	-0.625021	-1.42982	-1.2151	-1.28773	-1.30355	-0.207146	-0.717743	-0.0810102	-1.89033	-2.20723	-1.54289	-1.50766	-0.448845	-1.01006	-1.2077	-1.97615	-1.6024	-0.311446	-1.92973	-1.33083	-0.911536	-1.68032	-1.20323	-1.80804	-0.650763	244	-0.0358929
245	-0.738806	-0.815518	-0.887921	-0.633442	-1.12937	-1.24042	-0.511732	0.109314	-1.19412	-0.939637	-1.34507	-0.779984	-0.741093	-1.24136	-1.19741	-0.604761	-1.602	-2.16071	0.766931	0.141323	-0.440774	245	-0.402858	-0.884494	-1.4664	-0.650681	-0.931452	-0.741861	-1.37702	-0.724223	-2.18623	-1.92169	-1.27229	-1.52189	-0.520509	-1.01286	-0.576805	-0.549057	-1.10593	-0.144855	-1.4428	-1.93926	-1.29014	-2.44973	-0.965644	-1.47048	-0.428881	245	-0.2245
246	-1.52073	-0.428103	-0.67785	-1.29647	-0.918411	-0.802632	0.380773	-1.26732	-0.370163	-0.593975	-0.253334	-1.88704	-0.646629	-1.20666	-1.84041	-1.14878	-1.63485	-1.04183	-0.0267256	-0.149499	0.0566049	246	-1.45109	-0.750514	-0.533929	-1.05389	-1.68411	-0.893932	-0.527142	-0.714013	-1.02865	-1.90362	-2.14399	-1.40247	-0.234247	-1.53851	-1.25633	-1.32355	-0.942978	-0.746161	-2.56002	-1.23472	-1.03762	-2.91037	-1.60381	-1.17858	-0.787876	246	0.0999843
247	-0.689609	-1.00475	-1.17632	-1.20448	-0.546637	-0.888871	-0.110322	-0.834244	-0.914013	-0.160846	-1.07437	-0.97096	0.0384177	-0.901942	-0.996425	-1.34119	-1.54689	-1.75509	1.11756	0.546894	0.181069	247	-1.30761	-1.38918	-1.15776	-1.33385	-1.07537	-0.568829	-0.315675	-0.433246	-2.75317	-1.63571	-1.45623	-2.39145	-0.942618	-0.637221	-0.815874	-1.14651	-1.11516	-0.231723	-1.17228	-0.845048	-1.70405	-1.20968	-0.458435	-0.821159	-0.426537	247	0.256334
248	-0.830118	-0.915195	-0.970664	-1.20903	-0.32487	-0.985669	-0.330184	-0.297677	-0.640539	-1.03593	0.173571	-0.937334	-0.833697	-1.23526	-1.65589	-0.817407	0.0172737	-1.91416	0.453254	-0.457046	0.401384	248	-0.75788	-0.213841	-1.0931	-0.604566	-0.171132	-0.405249	-1.73615	-0.795298	-1.22126	-2.4545	-1.52505	-1.14078	-0.85796	-1.28248	-0.302483	-0.986257	-1.89619	0.140192	-2.00951	-0.991425	-1.99476	-2.45759	-0.689132	-1.18692	-0.941006	248	-0.337232
249	-0.902049	-0.868082	-0.868239	-0.867574	-0.0417165	-0.653915	-0.768164	-1.56083	-0.498492	-0.154118	-0.806649	-1.01536	-0.754109	-0.800879	-1.15699	-1.54506	-1.57551	-1.13836	0.760171	0.548288	0.319362	249	-0.921483	-1.28418	-1.24473	-0.662925	-1.47529	-1.20835	-0.609402	-0.584428	-1.7086	-1.55444	-1.78163	-1.07137	-0.438607	-0.900447	-0.751447	-1.39508	-1.44387	-0.601381	-1.08263	-0.0584705	-1.79663	-2.66951	-1.07633	-1.82869	-1.32696	249	0.0564329
250	-0.387349	-0.870029	-0.882298	-1.30103	-0.822874	-0.213924	-0.232226	-0.595528	-1.34723	-0.969914	-1.35188	-0.458386	-1.36849	-0.855415	-0.97584	-0.507792	-1.47942	-1.61374	-0.535549	1.20752	0.250692	250	-1.34678	-1.04482	-0.111758	-1.99416	-0.864531	-0.415935	-1.07808	-1.23942	-1.98663	-1.63313	-1.77654	-1.31883	-1.05326	-1.56531	-0.5764	-0.938301	-1.65458	-0.561896	-1.87642	-1.17198	-1.4753	-2.67737	-0.891042	-1.12537	-0.51404	250	0.121692
251	-1.24046	-0.74115	-0.940137	-1.02546	-0.453261	-0.952229	-0.00235099	-1.40647	-0.714439	-0.648222	-0.715991	-1.26152	-0.690514	-1.07814	-1.11207	-0.642556	-1.41231	-0.837943	0.6804	-0.576906	0.086171	251	-0.407982	-0.982721	-0.471584	-1.55137	-1.37249	-0.155359	-1.35696	-1.40749	-0.968853	-1.70065	-0.813927	-1.55724	-0.340955	-1.11807	-0.82722	-1.82709	-1.37724	0.200736	-1.85193	-1.52305	-0.545538	-1.45518	-0.585338	-1.38906	-0.131215	251	0.214118
252	-0.812228	-0.489233	-0.893143	-0.645459	-0.458017	-1.04903	-0.859156	0.0219149	-1.01977	0.153277	-1.1446	-1.75254	-0.616133	-0.947325	-0.997547	-1.06098	-1.15267	-1.13293	0.384299	0.27512	0.0933241	252	-0.133481	-0.476909	-1.23242	-0.706592	-1.26928	-0.624314	-1.59852	-0.766239	-1.78898	-1.1644	-1.82539	-0.814425	-0.499246	-1.64052	-0.472668	-1.43904	-1.66461	-0.0248946	-1.14424	-1.47922	-1.61507	-1.80111	-0.926316	-0.859284	-0.763266	252	0.17385
253	-1.32246	-1.42292	-1.00641	0.173382	-0.143306	-0.634556	-0.707213	-0.881205	-0.51044	-0.359329	-0.62065	-0.847666	-0.383321	-0.989276	-1.70904	-0.528026	-1.94111	-0.891808	1.29423	-0.267501	0.203005	253	-1.47415	-0.895408	-0.806012	-1.35629	-1.31806	-1.09286	-0.689655	-0.839671	-1.4558	-2.72499	-1.04417	-0.59283	-0.999713	-0.485607	-1.25754	-1.58611	-0.793273	-0.739016	-2.00595	-0.584464	-1.36003	-1.25113	-1.07917	-1.67937	-0.402317	253	-0.171373
254	-1.33476	-0.944397	-0.389053	-1.57329	0.647794	-0.656995	-0.178675	-0.364205	-0.268385	-0.636447	-0.457635	-0.892931	-0.539521	-1.60214	-0.520725	-0.210393	-0.966865	-1.22729	0.738087	0.126921	0.982693	254	-0.188747	-0.12427	-0.878747	-1.26978	-0.985876	-0.500191	-1.00465	-1.27515	-1.39678	-2.11477	-1.31775	-0.869177	-0.800865	-1.20368	-0.476315	-1.54614	-1.5438	-0.875146	-2.09797	-1.72693	-1.14821	-1.0628	-0.83428	-1.1345	-1.25352	254	-0.0948405
255	-1.04181	-2.02137	-0.230797	-0.593246	-0.508163	-0.226684	-0.558317	-1.65388	-1.63664	-0.620468	-1.64897	-0.686867	-1.65151	-1.34738	-1.24195	-0.775412	-2.14917	-2.10937	0.617304	0.720644	0.407584	255	0.132602	-0.57363	-1.18431	-0.755564	-0.558549	-0.346476	-1.5275	-1.0525	-1.0139	-1.00572	-0.222173	-1.17656	-1.42694	-0.878845	-0.781837	-0.946294	-0.773206	-0.351683	-0.676654	-1.14182	-1.46161	-2.06771	-1.09052	-0.887481	-1.05937	255	-0.0687818
256	-0.0802426	-1.17607	-0.481436	-0.885393	0.580356	-1.46702	-0.83913	-1.3382	-0.482562	-0.314754	-0.652572	-1.58312	-1.24391	-0.851601	-0.403203	-0.758996	-1.05058	-1.2403	1.15362	0.449799	-0.837056	256	-0.723842	-0.85401	-1.32016	-1.31385	-0.550083	-0.22112	-1.11941	-1.0368	-0.815079	-1.10032	-0.162276	-1.91119	-0.888279	-0.746432	-0.788726	-1.34673	-1.94395	-0.673207	-1.29984	-0.670119	-1.4789	-0.84445	-0.854147	-1.05587	-0.346847	256	-0.113546
257	-0.80142	-0.589689	-0.360535	-0.162276	0.00108074	-0.360881	-0.135574	-0.990779	-0.229001	-0.498939	-0.693858	-0.836458	-0.2327	-0.868763	-1.67573	-0.547496	-1.3897	-0.499208	0.256305	-0.0370729	0.548738	257	-1.36361	-0.281584	-1.04038	-0.946149	-0.510172	0.345243	-1.30158	-0.84831	-1.71792	-2.87292	-0.299912	-0.665689	-0.359068	-0.874844	-0.697555	-1.58691	-0.594604	-0.0403127	-1.14582	-1.42814	-1.29807	-1.35405	-1.35892	-0.955391	-1.31875	257	-0.204205
258	-0.9546	-1.14414	-0.80317	-1.59442	-0.0892689	-0.999308	0.112151	-0.360291	-0.463091	-1.06874	-0.334628	-0.64074	-0.939318	-0.926731	-1.89917	-1.20261	-0.691335	-1.06208	0.0859457	-0.450542	-0.103148	258	-0.559141	-0.949226	-1.20355	-1.68237	-0.785919	-0.178786	-0.578504	-0.556155	-1.16961	-1.46327	-1.07433	-1.19122	-0.751251	-1.14127	-0.377851	-2.01132	-0.891605	-1.13613	-1.62288	-0.234606	-0.880916	-0.523895	-0.359506	-1.51615	-0.815612	258	0.138946
259	0.253698	-0.656269	-0.785496	-1.54096	-0.512053	-0.39212	-0.919237	-0.536828	-0.812677	-1.21549	-0.748338	-1.59174	-0.268031	-1.01445	-1.13528	-0.237117	-1.1834	-0.899038	0.012484	-0.22987	-0.496091	259	-0.00391622	-0.586426	-0.926852	-1.20611	-1.08223	-0.544168	-1.22133	-0.742679	-0.677615	-1.44134	-1.10874	-0.548856	-0.970575	-1.19247	-0.954048	-1.57252	-1.38567	-0.308813	-1.73543	-1.43176	-0.74799	-1.46734	-0.89834	-0.250871	-1.01952	259	0.153937
260	-0.973235	-0.874701	-0.657767	-0.67571	-0.630502	-0.719914	-0.481692	-0.936862	-1.24811	-0.284057	-0.767492	-0.243699	-0.924441	-1.63875	-0.753522	-0.59369	-0.487159	-1.12679	0.432072	0.678368	-0.136052	260	-1.25198	-0.762181	-0.856811	-1.6489	-0.0816356	-0.350997	-0.871428	-0.854985	-1.85189	-0.543002	-1.24043	-0.571274	-0.774089	0.00764074	-0.192674	-1.29797	-0.901237	-1.29482	-0.898204	-0.777891	-0.585884	-2.06771	-0.82009	-0.732597	-0.0589472	260	-0.080442
261	-0.745142	-0.672233	-0.0155043	-0.850169	-0.817686	-0.588796	0.160042	-0.715104	-0.57549	-0.784047	-0.59341	-1.20591	-0.361751	-0.324928	-1.07465	-0.458543	-1.27949	-0.846619	0.515449	0.896253	-0.5619	261	-0.741044	-0.935301	-0.77407	-1.62972	-0.768584	-0.458269	-1.2747	-0.330756	-0.914489	-1.15021	-0.841539	-0.51954	-0.393719	-1.21328	-0.550872	-1.45343	-0.909264	0.00330925	-1.46373	-1.07949	-1.38632	-1.60063	-0.924694	-1.19764	-0.571854	261	0.184041
262	-0.484996	-1.16049	-0.950179	-0.829035	-1.43846	-0.052007	-0.487352	-0.132881	-0.00287634	0.150754	-0.509987	-1.22832	-0.599397	-0.387854	-1.1742	-0.768159	-1.21202	-0.472095	0.0958608	0.43168	0.112876	262	-0.33588	-0.322982	-0.872974	-0.822902	0.00866749	-0.601298	-1.06524	-0.733647	-1.28223	-1.53122	-1.02718	-0.951951	-1.27889	-0.811638	-0.522913	-1.39628	-0.719826	-1.32829	-1.07552	-1.10241	-1.12551	-2.48332	-1.14323	-1.00543	-0.943741	262	0.113671
263	0.224627	-0.472491	-0.812408	-0.892023	0.0391227	-0.578237	0.996385	-1.29298	-0.470614	-0.45899	-1.18886	-1.17961	-0.205551	-1.01635	-0.917827	-0.696386	-1.0958	-0.54512	0.31264	0.0939365	0.537293	263	-0.77069	-0.747503	-0.103291	-1.87418	-1.28621	-0.521563	-0.708113	-0.320546	-0.458603	-1.18676	-1.05394	-0.134552	-0.370093	-1.03926	-0.746585	-0.835195	-0.594604	-0.277977	-0.741816	-0.812877	-0.581201	-2.51798	-0.700079	-1.21075	-0.817174	263	0.254147
264	-0.874097	-0.599812	-0.485854	-0.0789834	-0.588137	-0.880951	-0.342809	-0.632923	-0.0458002	-0.247893	-0.604476	-0.913624	-0.599026	-0.318063	-1.03385	-0.715856	-0.119785	-1.46661	0.866082	-0.0728449	-0.0835959	264	-0.853772	-0.211583	-0.628985	-1.15143	-0.377136	-1.03943	-0.791175	-0.467016	-1.18864	-0.976474	-1.55734	-0.432023	-0.3823	0.0368436	-1.31144	-1.83868	-0.918495	-1.25007	-0.707853	-0.724809	-1.86652	-0.384166	-0.418296	-1.14641	-0.713655	264	0.262628
265	-0.741042	-0.147763	-0.553334	-1.6255	0.295906	-0.676795	-0.103792	-1.50343	-0.259977	-0.374467	-0.68492	-0.771362	0.242965	-0.202889	-0.753148	0.109911	-0.863011	-0.45402	-0.204296	-0.178767	-0.0201717	265	-0.152147	-0.0294304	-0.351129	-1.00859	-0.877835	-0.601298	-0.319688	-0.559689	-0.522288	-1.02077	-1.16949	-0.893319	-1.00995	-0.864843	-0.971472	-1.23043	-1.20426	-0.943212	-0.0661095	-1.34691	-0.652167	-1.00812	-0.914964	-0.609882	-0.935537	265	-0.244775
266	-1.33103	-0.73531	-0.545301	-0.752373	-0.474876	-0.338441	-0.251382	-0.233324	-0.82551	-0.445534	-0.822823	-0.575644	-0.265428	-0.483197	-0.744539	-0.412349	-1.10781	-0.455104	0.464972	0.331333	-0.260993	266	-0.338808	-0.601856	-0.537777	-1.41792	-0.558549	-0.284414	-1.2113	-0.342929	-0.570439	-1.13602	-0.524634	-0.57343	-0.950099	-1.4649	-0.835324	-0.888746	-1.11757	-1.48247	-1.09922	-0.8173	-0.846334	-2.10023	0.0349897	-0.58804	-0.26911	266	-0.399973
267	-0.140993	-0.571389	-0.250077	-1.09342	-0.461475	-0.530278	-0.190866	-2.66179	-0.321044	-0.487585	0.291044	-1.2404	-0.877582	-0.377176	-0.263226	-0.480686	-1.83691	-0.302909	0.875997	0.139465	-0.43982	267	-1.02945	-0.224755	-0.33766	-1.13755	-0.828652	-1.29055	-0.950878	-0.560474	-0.422101	-1.35877	-0.522086	-0.289323	-0.589023	-0.663224	0.0589569	-1.45143	-1.45149	-1.23954	-0.716146	-0.534599	-0.521763	-1.42374	-0.327071	-0.779857	-0.400364	267	-0.0546052
268	-0.461516	-1.09547	-0.494289	-0.092244	-0.289422	0.0465511	0.121294	0.132359	-0.325027	-0.523329	-0.14948	-0.757998	-0.51795	-1.33594	-0.548421	-0.531843	-1.83479	0.530732	0.260812	-0.15461	-0.112685	268	-0.569023	0.466597	0.179567	-1.05022	-1.19833	-0.524029	-0.0829415	-0.951585	-0.300558	-1.47359	-0.812228	-0.610075	-0.415376	-1.23648	-0.501843	-0.996647	-0.986324	-0.682232	-0.876089	-1.2311	0.280118	-1.18502	-1.00659	-1.47723	-0.478101	268	-0.0128376
269	-1.13499	-1.11844	-0.463763	0.00555287	-0.427756	-0.777553	-0.193042	-0.800763	0.0865115	-0.555288	-2.49086	-0.679107	-0.540265	-0.59532	-0.339203	-0.71013	-1.29786	-1.02159	0.985514	0.283017	-0.217597	269	-0.692	-0.856268	-0.488133	-0.731486	0.529523	-0.566363	-1.3076	-0.348034	-0.837602	-1.10849	-0.711974	-0.931689	-0.593748	-0.510009	-0.593013	-1.57092	-0.999569	0.153354	-1.01313	-1.49409	-0.239339	-1.76538	-0.376941	-1.80606	-0.52029	269	0.0537971
270	-0.79732	-0.339329	-0.630052	-0.0599213	-0.649091	0.00563189	-0.589663	-0.911207	-0.837015	-0.43376	-0.0188127	-0.394152	-0.842251	-0.577777	-0.093306	-0.382571	-0.211629	0.180068	0.611445	-0.038002	-0.510398	270	-0.647713	-0.374918	-0.779842	-1.53015	-0.561774	-0.388809	-0.720953	-1.13497	-0.848474	-0.233379	-0.69838	-0.595848	-0.158251	-1.59571	-0.0605777	-1.05739	-1.18218	-0.299788	-0.690082	-1.29825	-0.200434	-0.0389526	-0.316124	-0.827116	0.109808	270	0.297459
271	-0.694827	0.00175213	-0.852976	-0.700988	0.0603052	-0.0722466	0.0990899	-0.341159	-0.154216	-0.470765	0.141223	-0.818783	-0.25018	-0.393575	-1.3037	-0.13213	-0.605496	-0.846619	0.847604	0.123205	-0.126991	271	0.0136519	-0.610136	-0.31303	-0.727813	-0.153797	-1.29137	-1.26667	-1.1012	-0.76188	-1.72258	-0.912482	0.0447932	-0.233066	-1.06806	-0.487661	-0.781245	-1.1874	-0.179828	-0.194458	-0.247072	-0.451877	-1.6621	-0.155974	-1.23339	-0.590605	271	-0.0961641
272	-0.663148	-0.191761	-1.69005	-0.271262	0.455423	-0.112286	-0.403761	0.630227	-0.369278	-1.43921	-0.640655	-0.800677	-0.409355	-0.587311	-0.714598	-1.24652	-0.368823	-1.77461	-0.294433	0.7304	0.554937	272	-0.498751	-0.630083	-0.719422	-0.929825	-0.302556	-0.945719	-0.054853	-0.948444	-0.485009	-0.699103	-0.930323	-0.236727	-0.258266	-0.496408	-0.896509	-0.472727	-0.5637	-0.994355	-0.198012	-0.30498	-0.365061	-1.43267	-1.01997	-1.10074	-0.384348	272	0.0541892
273	-0.703772	-0.374371	-0.465369	-0.250128	0.443751	-0.548757	-0.0419695	-0.899467	0.247587	-0.069595	-0.14267	-0.599785	-0.52948	-0.869525	-1.47437	-1.56911	-1.33671	-0.601877	0.575841	-0.688403	0.396139	273	-0.797042	0.302509	-0.424634	-0.622522	0.19008	0.132754	-0.737806	-1.23078	0.0629075	-0.968304	-0.630836	-0.509193	-0.686675	-0.159975	0.232383	-1.39548	-0.754342	-0.129813	-0.328336	-0.148549	-0.340925	-1.54024	-1.07511	-0.343007	-0.159732	273	-0.0518086
274	-1.17561	-0.180469	-0.544096	-1.17547	0.0737063	0.152149	0.0520701	-0.517696	-0.376358	-0.18818	-0.522756	-0.671348	-0.217452	-0.731851	-0.287179	-0.293237	-1.7387	-1.15463	0.320302	0.610541	-0.0979021	274	-0.38163	0.102668	-0.854117	-1.07878	-0.254985	0.280304	-1.5909	-0.220805	-0.329682	-1.31534	-1.02548	-0.296221	-0.513421	-1.01606	-0.705659	-1.58211	-1.14245	-0.520154	-0.324781	-0.905368	0.0456056	-1.46841	-0.853742	-0.777077	-0.574198	274	0.381057
275	-0.28411	-0.473269	-0.458139	0.0855308	0.584679	0.513382	-0.063738	-0.812068	-0.248914	-0.510714	-0.674705	-0.756274	-0.939689	-0.782954	-0.641989	0.109911	0.174467	-0.981824	0.871941	-0.0756324	-0.551409	275	-0.281712	-0.267659	-1.11388	-1.63748	-0.176373	-0.167278	-0.713731	-1.24021	-0.619367	-0.833273	-0.550972	-1.49861	-0.657143	-0.440402	0.237246	-1.25681	-0.89923	-0.382519	-0.433779	-0.140506	-0.0311242	-0.344856	-1.0893	-0.589231	-0.574198	275	-0.0208825
276	-1.43017	-0.491569	-0.495494	-0.0624076	0.141144	-0.558877	0.147416	-1.33907	-0.561329	-0.25378	-0.502751	-1.05546	-0.246461	-0.527817	-1.11844	-0.553604	-0.630223	-1.17162	0.22025	0.698345	-0.274345	276	-0.930633	-0.448683	-0.887983	-1.56035	-1.06529	-0.563486	-0.348579	-0.979858	-2.00993	-0.91541	-1.68223	-0.831238	-0.602411	-1.17847	-0.218201	-0.495107	-0.897625	-0.206151	-0.490648	-1.1189	-0.87155	-1.11891	-0.487221	-1.8839	-0.839441	276	0.272924
277	-1.00901	-0.377097	-0.719222	-0.953353	-0.107858	-0.0440871	-0.801252	-1.3882	-0.0776612	-0.235277	0.0586515	-0.627807	-0.255386	-0.783336	-0.540187	-0.757469	-0.905754	-1.41527	0.635782	-0.333934	0.268337	277	-0.961743	-0.255992	-0.805242	-1.01185	-0.0167303	-0.951884	-1.02311	-0.8059	-0.317644	-0.362818	-0.873824	-0.610075	-0.259447	-0.792436	-0.745369	-0.660955	-0.673269	-0.335889	-0.16326	-1.09678	-1.27753	-1.279	-0.288148	-1.06341	-0.63045	277	0.164175
278	-1.10517	-0.528559	-0.648127	-0.617695	0.13466	-0.997988	-0.673254	-1.31907	-0.0440302	-0.471606	0.0799329	-0.870083	-0.733283	-1.02131	-0.490783	-0.340958	0.8912	-1.5888	-0.353022	-0.741364	-0.610541	278	0.13736	-0.284595	-0.274931	-1.15796	-1.39587	-0.625958	-0.0460251	-1.19269	-0.891966	-1.0728	-0.552672	0.455217	-0.791809	-0.817239	-0.865714	-0.779247	-0.621896	0.908841	-1.01984	-0.776685	0.026153	-1.49199	-0.173408	-1.30368	-0.437865	278	0.0423653
279	-0.400393	-1.65031	-0.691105	0.32878	0.605861	-0.951349	-0.148199	-0.175058	-0.173244	0.2706	0.0284319	-1.19082	-0.738861	0.0305097	-1.33364	-0.488703	-1.41231	-1.11486	0.819661	-0.440786	0.242585	279	-0.611479	0.430467	-0.927621	-0.41194	-0.163876	-0.665414	-0.876243	-0.474477	-0.412005	-0.38518	-0.89379	0.0495354	-0.834334	-0.808438	-1.26808	-1.33714	-0.906053	0.108604	-2.50316	-1.39235	-0.709084	-1.20503	-0.811981	0.049364	-0.374582	279	0.260687
280	-0.830863	-0.663278	-0.614387	-0.500007	-0.182212	-0.254403	0.386869	-0.950341	-1.0419	-1.3652	-0.443589	-0.0906597	-0.930392	-0.339801	-0.909593	-0.664317	0.36416	-1.11052	0.0169908	-0.349265	-0.0521223	280	0.170301	0.235895	-1.32824	-1.04532	-1.29387	-0.88489	0.220014	-0.591889	-0.471418	-0.892618	-0.0883595	-0.209566	-0.399625	-0.819639	-0.147291	0.0116294	-0.384295	0.548584	0.511657	-0.943571	-1.1655	-0.631462	-1.46637	-0.371998	-0.310127	280	0.0210109
281	-0.508104	-0.685472	-0.0408092	0.447711	0.454558	-0.377161	-0.559187	-0.452473	-0.277235	-1.24703	-0.872196	-1.62881	-0.257246	-0.843592	-0.833242	-0.774649	-0.956621	-0.191202	0.0413278	0.633769	-0.219982	281	0.0667221	-0.0346993	-0.520459	-0.642928	-0.56258	-0.463201	-0.993814	-0.692023	-0.205032	-0.962283	-0.329224	-0.109116	-0.650843	-0.761233	-0.489281	-0.685732	-0.236196	-0.551366	-0.536063	-0.348008	-0.00590784	-0.926287	-0.741028	-1.0102	-0.30583	281	0.185328
282	0.115053	-0.585016	-1.96599	-0.434533	0.0356643	-0.263643	-0.0358744	-0.599007	-0.508227	-0.133934	0.00331989	-0.357509	0.0421367	-0.0240264	-0.48966	-0.830769	-2.05945	-1.60398	0.094058	-0.158326	0.95408	282	-1.11473	0.0360542	-0.460039	-1.25019	0.027615	-0.563486	0.0542912	-0.958261	-0.617425	-0.544722	-0.0696681	-0.840723	-0.973725	-0.966853	-0.193484	-1.31875	-0.793675	-0.513761	-0.40495	-1.13137	0.321185	-1.07745	0.304609	-0.13451	0.0812916	282	0.246295
283	-0.658303	-0.352957	-0.365756	0.433207	-0.269968	-0.264963	-0.478209	-0.292894	0.338302	-0.70457	-0.256313	-0.218264	-1.45998	-0.683416	-0.707112	-0.186342	-0.528136	-1.0675	-0.65408	-0.269359	-0.2691	283	-0.0815086	-0.0907752	-0.990735	-1.31956	-0.186452	-0.177964	0.189919	-0.938234	-0.581312	-0.149522	-0.00977052	-0.0897156	0.170537	-0.383597	-0.0512581	0.209848	-0.244624	-0.594612	-0.0313566	-0.695855	-1.02249	0.0754037	-0.960373	-0.709961	-0.310908	283	-0.00342303
284	-0.453689	-0.0496436	-0.28462	-1.69636	0.0257216	-0.469119	-0.497365	-0.471605	-0.734795	-0.201636	0.0769535	-0.508824	-0.116666	-0.612482	-0.313004	-0.373409	-0.162528	-1.43986	0.202673	0.247245	0.286935	284	-0.986631	0.172292	-1.00959	-0.598852	-0.521057	-0.370314	0.836758	-0.558118	-0.205032	-0.39292	-1.26549	0.137915	-0.993019	-0.285187	-0.446735	-0.858374	-0.552863	-0.382519	-0.384019	-0.769848	-1.07508	-0.147591	-0.279634	-0.586451	-0.558572	284	0.0510964
285	-0.269948	0.108048	-0.536062	-1.13652	0.168379	-0.864671	-0.4264	-0.728583	0.227674	-0.0586616	0.0407751	-0.842493	-0.112575	-0.224246	0.339727	-0.0679932	0.537956	-0.24579	0.0909032	-0.466802	-0.850408	285	-0.529861	0.456812	-0.681323	-0.984511	0.310618	-0.56102	1.05866	-0.618199	-1.85655	-0.484087	-0.495323	-0.444957	-0.223222	-0.799237	-0.131893	-0.501501	-0.507912	0.310167	-0.230001	-0.0407765	-0.692153	-0.609305	-0.376941	-0.445468	0.0910576	285	-0.0322109
286	-0.566245	0.0395202	-0.139619	-0.0379584	-0.479199	-0.0225276	-0.104663	-0.612486	-0.313964	-0.376149	-0.206089	-0.682556	-0.300759	-0.378701	-0.820891	-0.431438	0.688791	-0.262058	0.696174	0.260718	0.596902	286	-0.0826066	-0.0316885	-1.07655	-0.56498	-0.719804	-0.798169	0.467594	-0.675923	-1.0605	-0.625568	0.277823	-1.2865	0.0681596	-0.918048	0.0297823	-0.187788	-0.864714	0.00932607	0.367117	0.229056	-0.476013	-1.6185	-1.15418	-0.545943	-1.30078	286	0.618113
287	-0.299018	0.221352	-0.450909	-0.301098	-0.668544	0.310546	-0.136445	-1.05992	0.506015	-0.636447	0.721779	-0.776535	-0.246833	-0.138056	-1.11469	-0.38219	0.362393	-1.34008	0.710596	0.391727	-0.324417	287	-0.193871	0.409016	-0.176411	-0.213602	-1.00845	-0.54499	-0.210143	-1.10473	-0.267939	-1.05216	-0.783341	-1.06577	-0.479164	-0.848842	-0.0172211	-0.651364	-0.244624	0.336491	0.459923	0.0493018	0.323346	-1.28579	-0.354236	-0.12061	-0.688264	287	0.737378
288	-0.450335	0.0204415	-0.34246	0.073099	-1.14796	-0.690434	-0.483869	0.65936	-0.00862902	-0.711719	-0.413369	-0.350611	-0.149394	-0.380608	-0.550667	0.465339	0.615316	-0.561388	1.07385	0.0642039	-0.184216	288	-1.45036	0.677352	-0.422325	-0.0719896	-0.406969	0.991751	0.166645	-0.961795	-0.0749453	-0.819942	-0.00382325	-0.528594	0.168174	-0.4132	-0.0698973	-0.67734	-0.280746	1.36386	0.250221	-0.473072	-0.245103	-0.648258	-0.0310975	-1.31043	-0.270673	288	0.371497
289	-0.486487	-0.38138	0.249193	-0.979875	0.230629	-0.700994	0.0115808	-0.719887	0.161296	-0.0952463	-0.26823	-0.119112	0.412925	-0.628118	-0.391975	-0.48374	0.925818	-0.786609	0.537983	0.38894	-0.22475	289	-0.666379	-0.0279251	-0.959948	-1.47464	-0.910489	-0.412647	0.667425	-0.962188	-0.369679	-0.78898	-0.694981	0.311224	0.0783973	-1.11447	-0.187001	-0.321266	-0.592998	0.0243681	-0.0771672	-0.181122	0.0798278	-0.661837	-0.322611	-1.05587	-0.706233	289	0.616308
290	-0.504377	-0.0539266	0.307836	-0.111306	0.697076	-0.121086	-0.168662	-0.313331	-0.464419	-0.232754	0.0858916	-1.01881	-1.18849	-1.12962	-0.404326	0.544365	0.556325	-0.163366	-0.310207	-0.209429	0.672725	290	-0.0877306	0.64461	-0.804472	-0.555185	0.0703477	0.10645	-0.0516428	-0.132059	0.45705	0.107207	-0.158877	-0.643271	-0.701244	-0.583616	-0.839376	-0.64457	-0.47179	0.601983	0.15623	0.373825	-0.336603	-0.126507	-0.915774	-0.540781	-0.852332	290	0.0724971
291	-0.480151	0.0831288	-0.545301	0.177526	0.116936	0.0755905	-0.0994382	-0.454212	-0.0741211	-0.365216	0.597922	-0.321728	-0.102162	-0.578158	-0.370642	-0.658972	-1.22226	-0.200963	0.403679	0.141323	-0.694947	291	0.268755	0.185465	-0.710186	-0.0711734	-0.29409	-0.512521	0.0703418	-0.699876	-0.138629	-1.1029	-0.0318604	-0.288892	0.282364	-0.695227	-0.165525	-0.956284	-0.627916	-0.252782	0.624209	-0.116378	-0.947199	-0.234073	0.0585054	-0.30647	-0.538259	291	0.176566
292	-1.12865	-0.139197	-0.883904	0.258747	-0.0814876	-0.318642	-1.25317	-0.531175	-0.266172	0.0645488	-0.123517	-0.719199	-0.233816	-0.551462	-0.23029	0.0301216	-1.15903	-0.0935948	0.494267	0.0470147	-0.041631	292	-0.0943187	-0.455457	-0.120224	0.174914	-0.804464	-0.818308	-0.72617	0.24845	0.128533	-0.776509	-0.327525	-0.325106	-0.790627	-0.145574	-0.798451	-0.88475	-0.249039	-0.370862	-0.177477	-0.618243	-0.961969	-0.28875	-0.274769	-0.875964	0.475445	292	0.0115114
293	-0.79732	-0.076899	-0.190229	-0.240182	-0.315359	0.138069	-0.0175889	0.148447	0.185192	-0.264713	-0.47466	-0.702387	-0.515347	-0.703629	-0.632258	-1.11977	0.0172737	-1.00098	0.761974	0.250962	0.261184	293	-0.0734566	0.133152	-0.528156	-0.525393	-0.617004	-0.328392	0.125716	-0.249471	-0.344438	-1.17945	-0.366182	-0.509193	-0.0625682	-0.0667664	0.340977	-0.709311	-1.18178	-0.190357	0.184269	0.132946	-0.385594	0.2087	-0.0331247	-0.119022	-0.744516	293	0.163261
294	0.165368	0.444457	-0.477018	-0.0910008	-0.400089	-0.520598	-0.196525	-0.529871	-0.491412	-0.250416	-0.366976	-0.416569	-0.417908	-0.930545	-0.28643	-0.264223	0.664417	-0.0216544	1.68498	0.00938436	-0.0950409	294	-0.742874	-0.137442	-0.656308	0.438957	-0.837118	-0.894754	-0.13631	-0.901322	-0.434139	-0.533541	-0.194561	-0.557479	-0.153526	-0.756433	0.110418	-1.39828	-0.303222	0.498569	-0.437333	0.609074	0.783004	0.598584	-0.538712	-0.878346	0.630918	294	-0.0011365
295	-0.361259	-0.463146	-1.21287	0.24673	0.303255	-0.217004	0.164395	0.0393077	0.371491	0.380354	0.119091	-0.213953	-0.442082	-0.41188	-0.13485	0.161832	-0.646473	-1.58265	-0.197535	-0.578764	0.156748	295	-0.150317	-0.38508	-0.902992	-0.356846	-1.12294	0.284003	-0.533562	-0.479189	-0.0578594	-0.139201	0.798634	0.263801	-0.426007	-0.403599	0.147291	-0.538667	-0.45694	-0.0429451	-0.196433	-0.257528	0.0571331	-1.10533	-0.463705	-0.504641	-0.819909	295	0.124781
296	0.306621	-0.467429	-0.891134	0.01094	-0.024857	0.151269	0.84923	-0.970778	0.0612882	-0.0935643	-0.459337	-0.527792	-0.659274	-0.733376	-0.60793	-1.0877	-0.756685	-0.193371	-0.0884695	-0.0352146	0.0604198	296	-0.30294	-0.167927	-0.825254	-0.272369	-0.247326	-0.324693	-0.286784	-1.01991	-0.211633	0.237077	-1.38614	0.0146149	-0.277954	-1.00806	0.794804	-0.427169	-0.904448	-0.28249	-0.677444	0.515377	-0.429183	0.600728	-0.443433	-0.553489	-0.0327745	296	-0.129824
297	-0.299764	0.252891	-0.329205	0.00762484	0.548366	-0.0326474	-0.303191	-0.566396	-0.200238	-1.19783	0.131008	-0.491149	-0.732539	-0.563285	-0.770739	-0.336759	0.0049101	-0.344482	-0.363388	0.866055	-0.226181	297	-0.559873	-0.0636782	-0.603585	-0.182994	-0.458974	-0.0567185	-0.224588	-0.00797143	-0.531607	-0.0863075	-0.77442	0.100838	0.20755	-0.398398	-0.130272	-0.322465	-0.323289	1.06829	0.185059	-0.538218	0.0283144	0.232286	-0.948615	-0.810436	-0.0206647	297	-0.109063
298	-0.730234	-0.0593777	-0.763806	-0.136584	-0.177889	0.0544709	-0.679349	-0.7238	-0.76046	-0.45899	0.0658871	-0.034186	0.183088	-0.120895	-0.356794	-0.732272	-0.27274	-1.14053	0.150394	-0.0612306	0.169147	298	-0.235229	-0.117496	-0.612436	0.0961494	0.0135052	-0.320172	-0.174029	-0.439528	-0.213575	-0.306914	-0.429478	0.51773	-0.104307	0.182858	0.206856	-0.09827	-0.0150507	0.804674	-0.953098	-0.474279	-0.10209	-0.361652	-0.533847	-0.173827	-0.778111	298	-0.28188
299	-0.588607	0.0266713	0.00457898	-0.61438	-1.0628	-0.272443	-0.205233	-0.901641	-0.362198	-0.329052	-0.637675	0.0360828	-0.359519	0.0244077	-0.0723468	0.139689	-0.442297	-0.524876	0.547447	0.0507313	-0.15465	299	-1.11473	-0.670728	-0.237601	0.188789	-0.187258	-0.222764	-0.512295	-0.939412	-1.08923	-0.186075	-0.150381	-0.622146	-0.25551	0.0144414	-0.316665	-0.134637	-0.469382	1.05625	-0.89465	-0.279645	-0.429183	-0.364868	-0.0538023	-0.211157	-0.572635	299	0.0107767
300	-0.588607	-1.84265	-0.253692	-0.455667	0.530642	0.245427	-0.910965	0.157144	-0.577702	-0.252098	0.214857	-0.139374	-0.493777	-0.678077	-0.730691	0.235514	-0.966865	-0.567895	1.08557	0.141323	0.264045	300	-0.0785806	-0.643255	0.220745	0.408349	-0.284011	0.505123	-0.124272	-0.640189	-0.149502	-0.237249	-0.121069	0.656549	0.0933601	0.567295	-0.189027	-0.366025	-0.63193	-0.0598674	-0.262384	0.98105	-0.0869605	-1.11569	0.0698579	-0.256431	0.344972	300	0.244623
301	-0.139502	-0.0375734	0.0829037	0.365246	0.66206	-0.561077	-0.806042	-0.299851	0.022347	0.13099	0.0816354	-0.704973	-0.0445169	-0.123946	-0.505754	0.246203	0.141616	-0.633329	1.34381	0.302529	0.283597	301	0.789576	-0.463737	-0.55625	0.238578	-1.31282	-0.953528	-0.480997	-1.18445	0.537432	-0.350347	-0.648678	-0.277252	-0.846147	0.454084	1.11167	-0.710509	-0.331317	0.0762632	-0.108366	-0.115172	-0.348851	0.428122	-0.130026	-0.638079	0.0203522	301	0.368281
302	-0.379522	0.211618	0.0234572	-0.824477	-0.105264	-0.500798	-0.14341	-0.731627	1.05163	-0.653268	-0.595538	-0.0777268	0.0830461	-0.51752	-0.304395	-0.520772	0.113003	0.640269	-0.171396	0.159441	0.695138	302	0.050252	0.754127	-0.474278	-0.0911705	0.169117	0.232217	0.0382406	-0.271461	-0.354146	-0.365398	0.454542	0.0124593	0.640684	0.301669	1.66842	-1.09216	-0.70618	0.275194	0.371856	-0.157798	0.475365	-0.121861	-0.74265	-0.411711	-0.511305	302	0.0170006
303	0.0584023	0.189814	-0.459746	-0.453181	-0.177889	-0.90515	-0.504331	0.498042	-0.706916	-0.541832	-0.480619	0.165843	0.795242	-0.47862	0.545202	-0.230627	-0.863011	-0.0657586	1.02653	0.0112426	-0.908587	303	-1.05434	-0.388843	-0.889522	0.185932	-0.651271	-0.0489094	0.0342279	-0.514138	-0.0893131	-0.39292	-0.238316	-0.0819555	-0.566185	-0.566015	1.73933	-1.58331	-0.466171	0.406436	-0.519082	-0.261147	-0.257351	-0.523895	-0.26666	0.527516	0.114105	303	0.325694
304	-0.44959	0.277031	-0.152874	0.278638	0.133795	0.0676707	-0.00714005	-0.19419	-0.329009	-0.752929	-0.177572	-0.892069	0.150361	-0.081232	-0.632632	0.319121	-0.315483	-0.613807	-0.133538	-0.0965381	-0.0993327	304	-0.0961487	0.503479	0.722578	0.412838	-0.198143	0.165223	-0.233416	-1.11337	-0.208915	-0.838004	-0.326675	-0.0517773	-0.496884	-0.462405	1.31184	-0.439558	-0.00381285	1.30934	-0.752874	-0.742101	0.179252	-0.25623	-0.54601	-0.350949	0.137543	304	0.0903096
305	-0.162237	0.25912	-0.644914	0.0643967	0.058576	0.12135	-0.94057	0.0688754	-0.00907154	-0.345031	0.263804	-0.571333	-0.188816	-0.362684	-0.1734	0.0274492	0.391006	-0.00466347	-0.4702	0.420066	0.506773	305	0.603647	-0.127281	-0.692868	0.500581	-0.171132	-0.1681	-0.30444	-0.532201	0.058636	-0.12587	-0.227271	-0.0315147	-0.640605	-1.14047	0.434984	-0.96148	-0.313657	0.958103	-0.994564	-0.480311	0.927098	0.423833	-0.845227	-0.0717625	-0.186686	305	0.502579
306	0.334947	0.245103	-0.1593	-1.42328	0.794774	0.306586	-0.298837	-0.876422	0.410432	-0.43376	-0.395919	0.859478	0.106476	-0.14759	-0.243763	-0.357375	-0.452541	-0.109501	0.875997	0.148291	0.44621	306	-0.209609	-0.624061	-0.25184	-0.168302	-0.831071	-0.0472654	-0.143934	0.23392	0.365407	-0.870256	-0.522935	-0.102218	-0.622886	-0.973654	-0.0172211	-0.463536	-0.451722	0.198856	-0.756033	0.0344228	0.120895	-0.47708	0.161893	-0.234191	0.111761	306	0.531204
307	-0.717562	0.0441926	0.0491638	-0.129125	0.236682	0.364225	0.756932	-0.365944	0.0741211	-0.623832	-0.0669087	0.0326341	0.481727	-0.0408067	0.344592	-0.217265	-0.89339	0.0459479	0.408636	-0.188059	0.414737	307	0.032684	-0.0896462	-0.0355593	-0.33032	-0.596847	0.370725	-0.943656	-0.128132	0.282307	-0.429473	-1.27654	-0.144899	-0.359856	-0.116771	0.316665	-0.569439	0.0254859	0.474878	-0.143909	-0.978557	-1.04302	0.0843378	-0.210303	-0.157941	-0.146841	307	0.249966
308	-0.00495693	0.560097	0.216658	-0.415471	0.247057	-0.873471	0.64809	0.169753	-0.037835	-0.0132462	0.212729	0.128338	0.10722	-0.340945	0.425809	0.0205774	0.26843	-0.0390069	0.834985	0.305317	0.052313	308	-0.34869	-0.221745	-1.08579	-0.391535	0.684328	1.0982	-0.133902	-0.526704	0.149891	0.465424	0.827096	-0.379427	-0.895367	-0.370396	0.21496	-0.369222	0.0965253	0.365447	-0.0668993	0.0830812	-0.617585	-0.513889	-0.643722	-0.265565	0.127777	308	-0.0555639
309	-0.0534081	-0.130631	0.182918	-0.603191	0.821144	-0.441399	0.336801	-0.0441776	0.0670409	0.354283	0.566851	0.124889	-0.358032	-0.0610193	0.145105	0.212226	-0.546504	0.0202807	0.274783	1.01844	-0.0235099	309	-0.720914	0.0258928	-0.51969	0.0492174	-0.209027	0.0600065	-0.384693	0.347798	0.399579	0.54283	0.572637	-0.385463	0.515863	0.165256	-0.21577	-1.2656	-0.386703	0.301518	-0.646246	0.0585509	0.388548	0.0103635	-0.0400172	-0.00385222	0.0812916	309	0.528311
310	0.0841187	0.349063	-0.35692	0.274494	-0.12904	-0.841791	-0.488222	-0.191147	0.399811	-0.156641	-1.15183	0.615908	0.427057	-0.727655	-0.61579	0.448923	-0.460666	-0.15469	0.120198	0.298348	0.365619	310	0.571805	-0.47164	-0.51969	-0.137694	0.274336	0.0698706	-0.451303	-0.530238	-0.300558	-0.269501	-0.0441797	-0.0517773	-0.245666	-0.160775	0.0366708	0.337731	-0.312854	-0.242252	-0.0803266	0.310288	-0.666937	-0.250869	-0.702106	0.30234	0.339894	310	0.205655
311	-0.180127	0.0216096	0.000562331	0.669825	0.604132	-0.4018	-0.704601	0.10627	-0.19891	0.299195	0.226774	-0.390703	0.32999	-0.594557	-0.357916	-0.358138	0.623441	-0.00900159	0.720511	0.893001	0.0828329	311	-0.302208	-0.239433	-0.208738	-0.0589303	0.52791	0.40155	-1.03073	-0.190568	-0.348321	0.171282	0.247237	0.832014	-0.472077	-0.444803	-0.452813	-0.0139472	-0.280345	0.256768	-0.552255	0.432939	0.690424	-0.445632	-0.591825	-0.250871	-0.724203	311	0.311038
312	-0.487233	-0.16178	-0.365756	-0.300269	-0.324005	-0.572517	-0.580521	0.0640924	0.133418	-0.206682	-0.782389	-0.146271	0.40995	-0.459933	0.52836	-0.106934	-0.223639	-0.799261	-0.0808079	1.01844	-0.23238	312	-0.253529	0.250573	0.189573	0.357336	-1.07537	0.20468	-0.569676	0.394134	-0.437246	-0.0996385	0.452842	-0.815718	0.0728847	-0.755633	0.426475	0.14151	-0.715812	-0.678472	0.487962	0.403985	0.40584	-0.144375	-0.24801	-1.00464	-0.0507438	312	0.601867
313	-0.458907	0.0270606	0.00739064	-1.35987	0.105696	-0.546557	0.00461491	0.173667	0.482562	-0.0292257	0.169315	-0.544174	0.0380458	-0.0663585	0.0870931	-0.127931	0.701155	-0.450766	0.697976	-0.364596	0.622177	313	0.04769	0.176809	-0.0894371	0.121044	-0.323519	0.415524	-0.44087	-0.878546	0.62325	0.130429	0.576036	-0.0263413	-0.148014	0.130053	-0.528991	0.209848	-0.416805	-0.10725	-0.186165	-0.0166484	0.359009	-0.497093	0.457867	-0.579303	0.128949	313	0.6108
314	-0.373931	0.0107075	-0.307515	0.464286	0.167514	-0.252203	-0.30798	-0.190277	0.296263	-0.643175	-0.102236	-0.406223	-0.136377	-0.601803	0.0260868	0.0263039	-1.11593	0.0170271	-0.200239	0.152937	-0.0702434	314	0.995635	0.472618	-0.389228	-0.185851	0.402534	0.47101	0.331164	0.030904	-0.123873	-0.892618	0.521236	-0.553599	-0.137776	0.200059	-0.246565	-0.167806	-0.121811	0.12327	-0.331495	0.532669	-0.814273	-0.0132225	-0.724	-0.477239	-0.419115	314	0.353998
315	0.138533	-0.731416	-0.20268	-0.244326	-0.276453	0.189548	0.43563	-1.1434	-0.086069	0.595657	0.318284	0.523654	-0.0969553	0.0720791	0.10431	0.246203	-0.099297	-0.289894	-1.08223	0.115307	-0.162757	315	-0.142997	-0.149486	0.397387	-0.0801517	0.138881	0.490327	-0.383088	-0.156798	0.0372785	-0.205856	-0.0620216	-0.08756	0.330009	0.657303	-0.569917	-0.384408	-0.199272	0.478262	-0.690872	0.51417	-0.167293	0.179397	-0.143811	0.367073	-0.760923	315	0.273073
316	-0.470088	0.410582	0.297795	-0.028013	0.0871074	0.417904	0.266707	0.207148	0.526813	-0.482539	-0.71897	-0.135063	-0.0720378	0.536589	0.558676	0.221006	0.200961	-0.165535	0.0773827	1.08951	-1.11412	316	-0.76886	-0.292122	0.0429483	0.109617	-0.322713	-0.24578	-0.134303	0.0929477	0.154551	0.371247	0.00297364	0.460391	-0.444514	-0.0375636	-0.0617933	0.456822	0.0363224	-0.102737	-0.79829	0.0123053	-0.531849	-0.70222	-0.165299	-0.4272	0.142622	316	-0.0361126
317	0.376317	0.479888	0.099372	-0.429975	0.0170757	0.364225	-0.371544	-0.0885292	-0.854716	0.00273334	-0.0409454	0.0847968	0.236271	0.518283	-0.0289312	-0.111515	0.515348	0.0951132	-0.18086	-0.483991	0.33796	317	0.153465	0.0703019	0.158786	0.274491	0.662559	-0.583625	-0.241441	0.222533	-1.08923	0.0229207	0.34919	-0.538509	0.248895	-0.822439	-0.424854	0.134317	0.43928	0.52038	0.179135	-0.989012	-0.742586	-0.0636107	-0.0420445	-0.773105	-0.167935	317	0.0221235
318	0.13257	0.126737	0.0756737	0.307646	0.263052	-0.321282	0.106056	0.0775718	0.197583	0.289944	0.137393	0.651689	0.0997818	-1.05411	-0.443625	-0.220701	-0.583242	-0.540782	-0.431441	-0.84961	0.463855	318	-0.127259	-0.075345	-0.19142	0.0761523	-0.110258	-0.17632	-0.387903	-0.444241	0.268328	-0.24671	0.0811378	-0.479015	0.0559531	-0.0807678	0.325985	0.319747	0.285964	0.480142	-0.222497	-0.00498648	0.166644	-0.00107209	0.201627	0.707022	0.114886	318	0.0412827
319	-0.0213558	-0.197991	-0.238027	0.23637	-0.0140496	0.175909	-0.572684	0.104531	0.856044	0.144026	0.637079	-0.171275	0.218419	0.226153	-0.121751	0.136635	-0.532021	0.502896	1.09052	0.269545	0.0971391	319	0.632195	0.436113	-0.488517	0.503437	0.354964	0.256877	-0.300829	-0.269497	0.381328	0.444352	-0.306285	-0.0651419	-0.459083	-0.0151615	0.0334292	-0.347242	-0.325296	-0.717205	0.586692	0.174768	0.148633	0.720445	0.538145	-0.123787	-0.156607	319	-0.0625589
320	0.221646	0.160612	0.309041	-0.0313281	0.56782	0.274907	0.38861	-0.0733105	0.0772187	-0.159164	0.0246013	-0.480803	0.0127563	-0.476713	-0.547672	-0.0210355	0.384648	0.614602	0.287402	0.18267	0.15341	320	0.333171	-0.533737	0.149549	0.305099	-0.244101	0.212078	0.435493	0.431832	-0.255901	-0.0682461	0.357686	-0.0810933	-0.359856	-0.0375636	0.367316	0.366504	0.049567	-0.164786	-0.450761	0.241925	-0.105332	0.245509	-0.588582	-0.418065	-0.174576	320	0.143114
321	-0.228578	-0.416033	-0.282612	-0.625568	-0.253973	-0.0740065	-0.280116	0.623705	-0.994993	0.264713	-0.326541	-0.194123	-0.486711	-0.0995378	-0.0686041	-0.0538677	-0.238122	-0.522707	0.294162	-0.362738	0.184407	321	0.271683	0.1117	0.460886	0.112882	0.161457	0.270851	0.425462	0.484844	0.230272	0.348455	0.0586231	-1.11319	-0.114544	0.446883	0.343814	-0.537068	-0.55206	-0.261431	0.776253	-0.00981211	0.177091	0.266951	0.585987	0.309488	-0.144497	321	-0.0677734
322	-0.144347	0.236148	-0.367765	-0.792154	-0.515512	0.164469	0.194	0.0332202	0.685233	0.100713	-0.0579705	-0.0324616	0.189411	-0.395482	-0.466455	-0.187105	0.607192	-0.0270771	0.0503416	0.0823222	0.0418218	322	0.518002	0.352563	-0.546244	-0.590282	-0.541617	0.339078	0.335177	-0.022108	-0.377833	-0.140062	-0.810528	0.33666	0.524919	0.274466	0.0646297	0.418856	-0.208503	0.343636	0.903812	-0.580845	0.222841	-0.190117	-1.0889	0.205041	0.415677	322	0.0898081
323	-0.041109	-0.319471	0.12789	0.763064	-0.409167	-0.0432071	-0.552657	0.224541	-0.393174	-0.661678	0.434055	-0.219127	-0.131542	0.643373	0.515635	-0.279875	0.125366	0.549169	0.120198	0.545036	0.124798	323	-0.71213	0.0503554	0.375836	-0.00791722	0.0638975	-0.534715	0.141767	0.202113	0.0640724	-0.405821	0.617242	0.817356	0.272914	0.291268	-0.174845	0.24022	0.16315	-0.630337	0.469401	0.260423	0.343879	0.292681	0.521522	0.00448764	0.63209	323	-0.0536444
324	0.0364129	0.250944	0.181312	0.844285	0.534101	-1.14847	0.385998	0.0345247	-0.0139392	-0.0944053	-0.406985	-0.0272884	0.0306077	0.0293656	0.498418	0.270255	-0.380833	-0.215785	-0.225478	-0.588055	-0.126514	324	-0.157271	0.0296563	-0.359211	-0.703327	-0.16307	-0.0287702	0.109666	-0.541626	0.587137	-0.12028	-0.288018	0.750102	-0.054693	-0.676425	0.0962355	-0.667749	0.310848	0.0540762	-0.752874	0.381064	0.487973	-0.747962	0.181355	0.149045	0.099261	324	-0.0704819
325	0.144124	0.676516	0.18332	0.108737	0.0814876	0.331665	-0.623622	0.782849	0.441408	0.346713	0.382554	-0.0402214	0.570984	-0.433619	0.447891	0.658896	-1.3957	-0.19554	0.153098	0.0883616	0.0041488	325	-0.246209	0.493318	0.925389	0.861345	-0.571852	0.715968	-0.597364	0.286147	0.240757	0.54369	0.364483	0.664741	-0.309455	-1.59931	0.52656	-0.538667	-0.123416	0.559113	0.651064	0.221014	-0.595971	0.887334	-0.355047	-0.541178	0.720765	325	-0.00575694
326	0.249598	0.606042	0.502644	0.363174	0.463204	1.43692	0.684225	1.91164	1.22466	0.334518	2.10337	1.12891	0.340032	-0.00495782	0.51788	2.9079	3.02692	3.86385	1.12342	1.55734	1.57115	326	1.6936	1.10225	1.42414	3.32425	2.56779	2.38711	3.08986	1.48304	3.18731	1.91936	3.32283	3.68558	0.841107	1.89982	1.22189	3.40013	3.64288	3.73223	4.28827	1.97553	2.56364	4.59891	2.62253	2.03505	1.86104	326	0.00892579
327	6.934	6.02791	6.59229	4.66168	3.13176	6.36395	13.976	11.2416	13.9815	5.25747	9.23348	6.35338	3.71766	10.3882	11.4814	12.8889	14.6942	17.6128	4.28228	6.42095	8.08143	327	10.4619	5.42273	6.95123	11.499	10.5403	10.9676	17.0872	10.6612	15.4818	16.9714	16.2063	12.9831	3.65805	7.922	7.97944	19.0502	15.0144	17.0757	17.1302	10.5386	13.157	16.3258	12.6427	13.6132	9.34096	327	-0.00700823
328	32.4316	25.5307	29.4406	19.0055	15.5918	16.3007	30.581	29.9027	32.3569	13.7052	22.0291	17.2541	16.7116	37.2267	38.2707	20.1635	20.5606	22.9628	8.77065	12.1305	13.6113	328	20.1006	11.4511	16.1062	18.3829	16.497	15.2959	33.0523	17.8877	25.4379	34.3189	32.7002	26.7995	5.5351	14.387	13.7613	30.4374	29.0886	33.5475	32.6802	19.7821	21.8138	27.0692	27.4413	29.4923	18.8362	328	0.764818
329	48.8297	40.5705	45.8125	23.8891	20.239	17.1961	37.0279	35.8267	36.1434	20.1983	29.5627	21.034	31.8265	54.0452	50.9548	21.4692	20.8608	24.9728	10.5382	14.2713	14.6766	329	21.3029	13.7024	16.879	19.5166	17.8552	14.2844	37.9458	18.2348	26.4169	44.8568	42.1267	31.782	5.85011	17.4329	15.3095	33.2632	33.829	37.426	36.6385	22.7301	23.8953	28.2532	32.172	32.9601	21.746	329	0.771225
330	54.2235	46.6691	48.1245	27.5776	24.7694	21.4033	40.9384	41.8981	41.9156	27.5447	36.7069	25.5851	43.2034	60.6517	57.378	27.0037	26.2411	29.3163	14.817	17.4248	17.0409	330	26.0777	14.7539	19.9042	24.4767	22.1938	19.632	42.0788	20.2571	28.056	52.8739	49.5981	36.5049	8.30007	22.0818	17.8445	41.2547	42.6977	45.2058	45.0471	26.9634	26.8697	33.5847	33.6843	35.91	21.6148	330	1.12121
331	61.2373	56.2568	52.6552	36.2099	30.911	26.9305	48.1877	49.3448	47.7409	35.2262	45.648	31.6907	56.0747	70.5364	65.8486	32.8558	34.7433	35.3365	16.8478	19.7825	20.3318	331	29.7733	17.5603	21.4667	33.6407	28.3896	26.3219	48.9087	24.2927	33.6625	62.4984	60.5275	43.9244	10.3161	27.2363	22.7835	50.8483	53.0622	54.85	54.9809	33.2215	32.877	41.3423	37.7238	39.2654	25.7176	331	0.836362
332	68.5132	61.5587	60.4717	43.0146	35.2089	31.3946	53.9329	54.5152	52.1886	42.2736	52.8437	38.7089	64.6195	75.9202	70.7145	37.0473	39.6396	40.8105	19.4163	20.4784	22.2589	332	36.0989	22.1048	25.4617	40.6442	35.73	32.1832	55.8767	27.9828	38.7794	69.0491	67.3937	52.3674	12.7503	32.6724	25.7216	59.9871	60.7393	65.7344	63.5159	38.9153	39.8086	50.2664	43.7154	45.9258	30.1572	332	1.17421
333	72.7497	64.5358	63.0174	47.8742	39.8457	36.495	55.5712	56.1288	53.4904	47.9446	57.9087	42.8651	69.5153	76.818	71.6359	40.9146	42.7496	44.0847	20.191	21.2533	22.8049	333	43.3292	25.7693	28.3565	47.2073	42.0093	38.264	62.1485	34.5401	44.3028	76.281	74.8418	57.5645	16.923	37.4777	28.3028	65.4153	67.7232	72.7549	69.3212	44.5971	43.5788	59.6497	47.1783	50.9924	36.0762	333	0.903962
334	73.3718	65.3881	64.1501	51.2714	42.6353	37.8541	54.8502	56.8632	55.7167	53.6464	59.7078	46.0777	72.2618	76.5682	71.2673	43.3144	46.3025	46.0885	22.1844	21.6794	23.113	334	48.5521	29.6799	32.3127	50.6027	47.2727	45.5223	69.5077	39.6988	50.1831	77.7732	78.806	63.3333	20.0321	42.1853	33.4286	72.122	74.7565	79.499	74.6388	48.614	50.3674	66.0451	51.0924	53.1802	40.4853	334	1.14003
335	71.1955	65.9009	64.7084	52.4367	45.4919	39.9621	54.2158	57.3815	53.7228	57.5879	62.0756	48.672	73.2551	74.5172	71.4084	44.6945	49.5856	47.1933	22.3764	21.8633	23.1192	335	52.741	32.5966	35.3433	55.4261	51.8144	49.3188	73.9445	43.006	55.2821	80.9954	81.8957	66.2158	22.8266	43.0514	35.3986	74.6297	76.9652	83.5927	77.4632	54.0432	54.7986	71.9838	53.6832	55.8732	42.7408	335	1.28738
336	69.332	64.6903	63.4709	53.5153	45.8719	41.5562	53.7461	55.8418	54.2803	59.3368	62.2173	50.6822	72.801	73.0333	70.2032	44.0879	50.7004	47.7124	23.8308	20.8891	23.009	336	56.3384	35.9491	38.4593	59.4235	55.4919	52.7071	77.2942	47.9058	61.1779	82.4601	82.9891	69.6134	26.1271	47.7874	37.1828	76.7098	79.401	84.1143	79.1006	57.2294	62.1683	75.3444	53.8778	57.5281	46.4246	336	1.44336
337	68.3619	64.0234	60.8243	52.2179	46.9068	40.6872	53.1009	53.8782	53.0431	59.2396	64.285	48.7466	73.2637	72.039	68.9445	44.3043	50.7679	47.9315	22.6738	21.3026	22.3519	337	58.403	37.4906	39.8936	61.3636	58.461	55.4587	80.1288	50.1775	63.9532	83.0355	84.5129	71.3172	29.6965	50.4657	39.3546	77.5434	80.536	84.599	77.9664	59.6028	65.9216	78.7694	54.5918	59.3843	47.2769	337	1.90992
338	68.0962	61.6907	60.9131	51.0891	47.5315	41.2438	51.4221	54.1543	50.1304	59.661	61.0081	48.4983	72.2491	69.9568	66.8984	42.46	53.2816	48.3078	22.3512	21.0643	21.091	338	60.2502	39.4205	41.5	65.6577	60.9233	55.8956	80.9626	52.9161	65.7791	83.318	84.0698	73.077	32.8308	53.2256	41.1027	78.3219	80.9699	85.2951	77.246	63.2718	71.4609	82.605	55.0212	57.4955	50.3587	338	2.8367
339	66.0497	63.4673	57.1314	51.8424	45.4513	40.3379	50.5836	53.5356	50.4459	57.4297	61.5763	48.8833	69.6328	69.1845	67.6593	42.3993	52.6058	47.2031	21.6102	19.1646	20.7033	339	61.5378	41.2801	43.179	64.386	63.8473	57.0173	82.4902	54.903	68.7086	83.6324	85.9423	73.0719	33.8195	54.8753	41.4268	79.6627	80.9145	85.0217	76.3176	65.6822	75.0243	82.1615	54.115	58.3728	50.4012	339	2.35047
340	64.8496	60.3225	53.4204	48.0205	44.1518	39.8455	48.5047	51.7719	48.9148	55.3272	61.5682	48.3845	69.3074	67.1762	63.8241	42.1137	52.0318	47.4839	21.8414	19.9172	20.5607	340	62.9575	45.3059	45.1744	65.7548	64.9281	56.6038	82.4011	58.8259	69.3602	82.9835	83.8918	70.5602	35.6852	55.3862	41.5383	78.65	81.5302	84.3204	75.0365	64.5941	76.5777	83.6156	52.2463	59.2755	50.2755	340	1.73091
341	62.8258	58.1401	50.0677	47.8962	43.078	37.8546	49.0846	50.3888	46.5332	52.4622	59.9393	46.8597	67.7041	66.2796	63.3118	41.7518	51.9912	44.6801	20.2447	19.3277	18.5192	341	63.7719	46.5926	45.5635	66.6339	66.1517	58.0703	80.9417	60.6539	69.2429	81.8546	82.8846	71.1323	36.829	55.5506	41.3628	78.2376	80.5525	83.0335	74.5839	64.9045	78.4714	83.5002	52.1571	60.0185	50.1817	341	2.08219
342	57.5387	55.9102	49.5528	47.7627	40.7661	37.2544	46.6287	48.2438	44.8623	52.6506	58.9774	45.7621	67.0049	65.206	61.7574	42.7807	51.1438	45.5361	19.8832	18.7038	18.3576	342	63.1124	48.0453	47.0763	66.5151	66.2194	58.8372	80.5926	61.0713	70.1543	80.2269	81.1459	72.3704	39.1731	53.9204	42.2425	76.4484	79.8011	81.0183	74.5578	66.6023	78.6749	83.2872	49.9532	58.9058	48.6762	342	2.0572
343	57.2778	53.5005	47.5549	44.6689	42.101	35.8086	44.8119	47.4624	42.9033	53.4799	55.3983	43.3294	65.4942	63.3579	60.5837	41.5563	50.87	44.4151	20.2136	17.1869	17.2546	343	61.924	49.7889	46.7511	64.9349	66.227	59.8318	80.9466	63.1026	71.4866	79.1497	79.6697	70.68	39.4857	52.2963	41.3604	77.5283	78.3535	79.7111	71.56	66.9687	79.6789	83.7836	49.9576	57.3109	48.4024	343	2.03609
344	54.9141	51.2714	45.5345	42.9823	38.7589	35.5587	45.1014	47.0198	43.0312	51.2167	54.3296	44.7615	64.5466	61.2001	59.3639	39.1138	48.3669	44.1201	19.8007	17.0917	17.4458	344	62.9568	50.0885	45.3957	63.6164	65.8892	61.0167	80.9867	63.8534	68.8655	76.7931	78.4394	70.674	40.3158	51.1622	43.1125	77.9315	76.6919	77.8749	73.9631	66.9707	82.7391	81.8645	48.9176	56.5075	48.1805	344	2.00886
345	52.8068	49.8436	43.1	41.9571	38.8696	34.2933	42.7783	45.961	42.1032	48.4421	52.0065	42.303	62.9132	59.4507	58.8804	39.4448	47.1479	44.6103	19.1909	17.7574	17.6709	345	61.5752	47.5869	46.0334	64.9345	64.352	60.5001	77.5049	61.958	68.7389	75.4549	75.2135	70.5145	39.531	51.0098	42.1724	78.027	73.8242	76.5993	70.1959	67.898	82.0302	78.2594	49.3276	55.8732	47.9121	345	2.06496
346	48.8946	47.6001	43.6628	40.3695	37.3112	32.5659	41.8357	42.9981	42.1382	47.8992	51.3523	41.3102	61.2921	59.0148	55.8933	37.7199	47.4315	41.6528	18.6722	17.2362	17.1244	346	63.5406	48.6829	46.2447	62.1435	63.5063	59.63	75.6025	64.3376	67.6857	73.8573	75.6765	70.0066	38.5411	50.2313	43.0529	75.7663	73.1555	75.8683	68.4614	68.1831	81.1987	77.6144	47.7755	55.2787	48.0043	346	2.13928
347	48.8398	46.4526	43.1265	39.8905	36.0126	32.3666	40.4177	42.4651	41.3731	47.3875	51.1259	41.2878	57.5247	58.2449	56.3993	37.6276	47.6519	41.2645	17.5766	13.8086	16.3213	347	62.7354	49.2173	45.0636	61.8587	63.2438	59.3805	77.1317	62.4037	67.5028	70.9116	71.2143	67.4721	37.7044	48.8431	40.9584	73.6426	71.7355	74.287	66.2171	66.2175	81.2456	78.0028	47.336	56.0539	48.0418	347	1.9327
348	46.7232	45.5711	39.7706	36.9421	35.77	30.3474	39.4708	40.5349	40.0615	46.8883	49.8107	41.1015	58.2838	56.7068	55.8173	36.6853	46.7681	41.1174	18.6488	14.8051	16.0471	348	63.6046	48.2851	45.6305	61.9162	62.2968	58.1003	76.572	62.7366	67.9207	69.855	69.4106	66.2994	38.8797	50.0997	41.7834	73.9715	70.456	72.0333	67.345	65.1084	81.0399	76.2689	46.4031	55.9594	46.9703	348	2.02636
349	48.2819	44.3843	37.6478	37.0233	35.0676	31.0237	39.4669	40.5419	38.2587	45.4182	47.8055	39.9199	56.5652	55.4467	53.6585	37.116	47.1662	40.9522	18.0232	15.4453	15.2684	349	63.3905	48.3671	45.4785	59.7181	60.8641	56.2253	75.1844	62.3636	64.7699	67.5672	68.4026	64.612	38.9167	46.9594	39.7513	73.3944	68.1254	70.6652	65.6757	64.5072	80.6371	76.3382	45.3587	53.2907	44.7472	349	2.29037
350	45.5597	43.5273	37.651	37.4609	32.9156	29.7592	37.2561	40.2392	38.0817	44.7555	46.5827	39.1383	55.6983	54.9967	51.6247	35.9401	48.0197	40.5104	16.467	14.8766	14.565	350	60.6748	48.6302	46.1958	60.6968	62.0493	54.1974	73.426	60.7069	64.3167	68.2239	69.4535	64.4029	39.6641	45.2212	38.3461	71.0026	66.0725	67.9133	63.8618	63.2799	79.2697	75.3905	43.6084	50.7486	45.164	350	1.86722
351	45.1817	41.7885	35.9641	34.3799	32.859	29.0631	35.6744	38.6778	37.2533	44.4153	46.1745	38.0877	52.4393	53.2924	50.3574	34.8681	46.7229	39.6005	16.4165	14.4004	14.7968	351	59.1559	46.9836	44.0207	59.6802	59.7635	53.3392	71.1729	62.1284	64.2379	66.5855	66.666	63.5127	39.9437	44.3315	37.9875	71.4067	63.2939	66.5162	61.2396	62.6377	78.0906	73.951	44.3552	50.4233	43.8917	351	2.09306
352	43.5978	38.857	36.238	32.6171	32.712	29.4226	36.4785	38.3138	36.9754	44.057	46.1903	37.2626	53.4211	52.5823	49.9435	34.6448	45.1305	38.704	15.622	14.0553	14.5183	352	57.2772	45.8678	43.7767	58.6142	59.9917	51.2336	70.1337	62.1256	61.0362	64.0478	65.4162	61.7852	40.9395	43.0102	35.3553	69.3521	61.3064	63.8128	61.6056	61.6979	78.6198	73.4983	44.0657	50.2089	41.8643	352	2.13285
353	42.1796	36.2864	34.41	32.0614	32.3246	29.0266	35.2029	37.7908	35.2111	43.9018	44.7244	37.1281	52.7818	51.9683	48.8824	34.7494	44.1912	37.4445	13.8089	14.5663	14.8096	353	57.3259	46.5941	42.6337	58.3057	58.1332	50.5588	68.2967	61.9984	58.4271	63.1134	63.3695	61.605	42.1487	41.5564	34.8537	68.5301	61.0632	65.4249	59.7866	58.293	77.8414	74.4113	43.5212	47.1708	42.0647	353	2.44155
354	39.7537	35.1923	34.2811	31.7083	30.793	28.1101	34.0496	37.1237	33.7906	41.3253	42.0208	34.8118	51.6226	52.3698	47.3951	32.9547	43.3109	37.4477	15.498	13.9071	13.5521	354	56.2388	45.6491	42.6637	56.0219	55.5439	51.6849	68.8131	61.0941	57.1515	61.2359	62.8555	59.5524	40.528	39.9095	33.1696	67.334	59.699	63.0178	59.073	59.2802	75.172	71.4899	42.5092	46.9885	40.463	354	2.09922
355	37.6379	35.216	34.0778	32.7882	30.0802	25.5577	32.669	36.7263	33.9534	40.269	40.4107	34.8041	50.6133	49.8936	47.1114	32.5351	43.7277	38.0464	14.1261	13.0281	11.9842	355	55.1244	46.3766	41.9502	55.1102	53.5576	50.7774	68.1715	59.7664	55.5326	58.2398	60.5377	58.601	39.0211	39.6007	32.4463	65.5448	60.2155	62.6707	56.3489	58.328	74.5477	70.3349	41.6894	46.3412	39.8154	355	2.20584
356	37.9994	34.7379	32.3113	29.8796	29.5281	24.6909	31.6207	35.7058	31.7272	40.4809	41.0628	33.9445	50.7248	50.0069	45.7659	32.563	38.8311	37.0002	15.6287	12.7071	12.0724	356	54.321	44.8844	42.1577	54.6948	53.5576	48.992	64.4534	57.1967	55.5454	58.4067	59.2926	57.396	38.6088	38.4773	32.2178	63.7133	59.7166	60.6265	55.642	56.7669	74.0214	68.9086	40.7832	45.9405	40.0357	356	2.07723
357	36.0062	33.4472	31.8345	30.5716	29.0284	23.623	30.9615	35.6541	31.6851	39.1063	39.3692	33.6591	49.3123	48.4669	46.0855	32.1205	42.1922	33.1505	14.8274	13.1349	12.1654	357	52.7984	44.304	40.9577	54.2883	50.88	48.0414	63.5938	56.1384	53.478	57.8463	57.3946	56.1647	38.6647	36.4656	31.9046	64.0214	58.8999	60.4908	56.2079	53.6564	70.8388	67.7458	40.0393	46.0334	40.1712	357	2.50597
358	32.4588	32.7023	31.743	29.8253	27.3195	23.0405	29.7586	35.1444	31.9865	37.666	39.8169	33.0379	47.9043	46.8842	44.9451	29.8937	40.5772	32.4303	14.5286	12.5198	12.1749	358	52.0408	42.9808	40.3886	54.1067	50.5466	47.5247	62.7652	53.3465	55.204	57.9414	57.9744	55.1296	38.5994	35.7635	32.2693	62.1152	58.4496	58.6113	53.9525	52.6213	70.3975	66.8631	39.9156	43.9897	38.6528	358	2.26834
359	31.3635	32.5232	29.7186	28.0132	28.102	23.506	28.8278	32.7129	29.9779	36.5445	38.9972	33.3508	46.4624	46.5219	42.5389	29.8807	38.9271	30.5404	14.0698	11.1675	12.0481	359	50.3188	41.5676	39.1436	52.8265	47.7613	46.7327	60.104	53.3088	53.9913	55.2653	54.1159	53.3633	36.7271	34.0789	32.1157	60.6921	56.3084	57.0131	49.9358	52.5195	71.1432	65.0941	39.8268	43.1216	38.0305	359	2.26196
360	30.1291	31.9602	28.6349	27.4177	25.6063	23.1465	28.6636	33.2465	29.3885	36.2851	36.3838	32.0817	44.34	46.0448	41.7522	28.7067	37.1139	30.0682	13.57	12.0715	13.1458	360	49.2976	40.6109	38.5355	51.9613	47.1271	45.7808	59.7967	51.4588	51.3581	54.3214	53.7289	51.3888	35.9372	33.6661	31.5902	59.3241	55.8412	55.061	49.8848	49.9362	68.9144	66.0194	39.3695	42.7121	37.1286	360	2.26331
361	30.7996	30.3042	27.3515	28.2788	25.1023	23.0088	28.7751	32.8712	28.7278	35.2178	37.4585	32.5964	44.9904	44.8465	40.0848	27.3999	34.7779	29.2715	12.9715	11.1438	11.8206	361	46.6723	41.5262	38.0149	51.3626	46.8538	43.6605	58.3874	50.1614	52.1068	54.4654	52.3878	50.3843	37.7044	32.0259	29.9993	59.1047	55.714	53.9655	49.9449	49.1585	68.5585	65.7202	38.6064	40.7967	36.1516	361	1.84413
362	30.0791	31.3648	26.0602	27.3563	24.8676	21.805	28.1952	32.0459	27.9317	35.3225	34.606	31.2587	42.3373	43.8206	40.3898	26.5738	35.8009	28.645	12.679	11.4012	12.2894	362	46.1811	41.3614	36.5078	49.3931	45.8794	43.8257	56.8574	48.8915	51.4253	52.5643	50.675	49.5958	36.796	31.6175	28.5917	56.7633	54.0138	52.1297	50.6301	47.2303	67.5293	62.7799	38.4588	41.0446	35.6312	362	1.95158
363	27.7811	29.8553	26.7294	26.2756	24.5559	22.7065	28.8665	32.0103	28.4711	33.9504	34.766	30.1749	41.6139	42.3222	38.8916	26.7368	33.6896	27.3157	12.1039	11.1656	11.2088	363	46.7459	41.8717	35.6088	48.3035	44.5136	43.4307	55.4032	48.7544	50.5054	52.1957	51.8063	47.9269	37.1444	34.0049	27.9887	54.7135	52.8202	48.9874	49.6297	48.1897	65.7418	63.4878	37.6739	41.2975	36.0992	363	2.15867
364	26.5873	30.1376	26.2289	25.3399	25.4814	20.9545	26.2208	29.5214	27.7605	35.3175	35.8173	31.1475	42.3562	41.6709	38.9287	24.6955	33.461	27.0099	12.8043	9.63625	11.7429	364	47.0376	40.9451	34.5821	46.6596	44.6442	42.9938	55.0489	49.3702	49.9214	52.3652	50.0178	47.9454	35.7139	32.6284	27.7837	55.9276	52.2539	50.1321	47.774	47.9822	65.3268	62.3124	36.7637	40.514	34.1656	364	2.15091
365	26.3707	30.6722	25.6356	26.5868	24.6773	21.4099	26.6026	27.9273	27.1047	34.8877	34.8205	30.3077	40.5042	42.6933	38.0907	24.5615	31.313	27.4476	11.729	10.0966	10.3246	365	45.7463	39.1484	33.222	46.6172	45.4094	42.1648	54.6709	47.4068	46.2265	51.0149	49.3466	46.6461	36.4436	31.1906	26.3655	54.7871	50.7962	47.9107	44.8887	47.3473	62.477	63.8898	36.5338	40.452	33.7636	365	2.07161
366	27.0207	30.5067	23.941	27.2221	24.9164	19.9403	26.6052	28.5174	25.4337	32.2877	33.0171	28.6678	39.2561	40.148	36.8095	25.0776	32.1809	26.4886	12.3586	10.1268	10.3246	366	43.9858	37.9276	32.5651	44.6758	46.0749	40.4822	54.4639	47.2194	47.3728	49.7303	48.102	46.5685	34.1428	29.5605	26.5766	54.2847	50.62	46.8913	45.1731	47.6847	63.8881	61.5977	35.6779	38.9528	32.4956	366	2.41501
367	27.3006	30.9837	23.0393	27.6974	24.6285	18.6617	26.1132	27.4681	24.0128	33.8907	32.4204	28.7571	37.8603	40.4974	36.0501	24.7508	32.3625	27.6559	11.8592	9.45692	10.1739	367	43.9203	36.4598	30.9461	43.8539	43.8661	40.6869	53.508	45.8655	45.7054	48.5112	46.9818	45.7851	34.1625	28.1436	24.8537	51.8781	50.4928	46.8826	44.724	45.682	62.6838	59.148	34.9108	39.3766	31.4288	367	2.15428
368	27.5381	29.9036	24.7749	25.9557	24.1288	20.1291	26.4202	27.1399	24	33.3087	32.9094	28.0298	38.0991	40.0268	36.3136	24.2064	30.6944	26.7709	12.0936	9.12615	9.31462	368	45.2522	35.0455	31.4926	43.3062	42.3927	39.7638	52.4575	45.0974	46.8801	47.0758	46.3042	43.8192	33.5561	28.1776	25.0798	51.2847	49.1623	47.306	43.5061	45.6217	59.6751	57.9873	34.3858	38.483	29.3955	368	1.98224
369	28.3818	27.2361	25.3143	25.7058	23.6135	19.9232	25.0927	27.2168	22.9897	32.8087	32.2404	27.0258	37.8796	38.5551	35.6699	23.9495	30.7414	24.0997	11.7177	9.55727	10.4758	369	44.5879	35.7982	31.745	41.753	41.2022	39.4682	52.9695	42.8234	46.1353	46.1439	45.2158	43.0126	34.0397	28.3876	23.7576	51.0553	48.315	45.011	41.169	45.0076	58.3142	59.6676	34.2171	37.9739	28.2244	369	2.2194
370	28.5984	26.8969	25.2589	26.6266	23.2936	18.7968	23.9904	25.9537	23.003	33.2309	31.195	25.3475	37.8265	38.2286	35.2039	23.5563	28.6096	24.3336	11.5329	9.63346	9.27266	370	44.0711	34.2299	30.6936	40.4352	39.5949	38.1588	50.5174	43.2557	45.6821	44.0664	43.4393	41.0467	33.3336	27.3547	25.1252	51.2475	47.1222	45.2479	38.9092	45.1954	56.5087	58.0477	31.9596	35.5537	28.1681	370	1.93738
371	27.4538	25.6724	24.2178	24.9168	21.6362	19.2865	23.7488	24.5809	23.2902	32.4399	30.746	26.1463	37.3846	37.4777	34.2084	25.3712	26.1694	24.3206	10.2516	8.1761	9.13627	371	42.348	33.8182	28.2464	39.5782	38.7366	37.7038	47.0645	42.2025	42.8361	42.8318	41.2855	40.3155	31.6377	25.9889	25.1782	49.5051	46.1903	45.4905	37.6052	43.9669	54.9579	55.5965	31.4175	35.2833	28.7033	371	1.7614
372	27.481	25.8861	23.314	25.2736	21.2596	19.0881	25.2281	24.1931	23.0468	31.2473	30.7098	25.0061	36.8896	37.1772	33.3838	23.7029	28.0193	24.9352	10.8997	10.0005	9.64891	372	41.4059	33.0241	26.7783	37.6266	38.6495	36.1958	47.8634	41.7506	39.5117	42.5707	40.9189	39.2248	31.7275	26.8754	23.8358	50.3368	44.6804	43.6392	37.0555	42.707	52.2313	56.8837	30.6918	35.5891	28.2084	372	2.25404
373	26.7334	25.781	22.7147	25.4713	20.0751	18.2235	23.6887	24.6118	21.2201	30.6607	31.5683	25.4587	36.9945	37.2431	32.6184	24.0045	24.4215	24.8408	10.3683	9.29897	8.80485	373	40.2801	32.4923	27.3286	37.3242	36.2803	35.5267	48.0581	41.2224	39.4578	41.9532	37.2962	37.2792	31.6834	25.0537	23.9278	48.9976	44.0398	42.0274	36.2665	41.2433	51.902	55.3256	30.0735	33.5307	28.1697	373	2.58035
374	25.3268	26.2249	22.3825	23.3048	21.1126	17.8715	23.0857	23.9409	20.5833	29.3331	30.9311	24.7793	35.8498	36.3717	34.9636	23.567	25.8409	22.8424	9.93793	7.79329	8.6985	374	39.939	31.1917	26.7544	36.0318	34.2283	33.4943	48.4962	40.1893	39.3653	39.0965	38.2868	35.7526	30.397	24.786	22.6871	47.5661	44.2469	42.0526	33.8732	41.0836	52.522	54.2185	29.0817	32.2067	28.9959	374	2.13227
375	25.4755	26.1205	22.5633	26.051	20.0336	18.4065	24.1079	24.2096	20.0156	28.9887	29.4453	24.5681	35.8048	36.3946	31.9096	24.1049	25.0588	20.6466	9.57783	7.15915	8.42955	375	38.4786	32.5183	26.1814	34.947	35.5175	33.036	45.6533	40.4512	37.6987	38.9709	37.3544	34.8291	29.726	23.6883	22.2045	46.2233	43.4823	41.4678	33.0218	41.1866	50.34	53.1814	28.9913	33.3675	27.9212	375	2.39437
376	24.4402	26.2031	21.4153	24.8435	20.0885	17.6744	23.7984	23.7096	20.2209	28.6368	28.8345	24.3349	34.5399	34.6555	32.0967	22.9344	27.2192	20.2659	9.21052	7.67761	7.93408	376	38.3578	32.4577	25.6056	34.2549	36.0392	32.5654	46.3836	37.3977	38.0645	38.5564	38.1603	33.7311	28.4672	24.6084	22.0177	47.7311	42.6415	39.8365	33.2339	39.6255	50.6725	54.6062	28.5024	33.8044	27.095	376	2.21295
377	24.2557	24.5849	19.3307	23.4482	19.153	17.4922	24.5263	23.3765	18.7531	29.0375	29.7713	24.8324	33.5265	34.6681	32.1435	22.3598	23.844	22.1107	9.12129	7.76263	9.51729	377	37.4611	30.235	23.89	33.8611	34.9931	32.6057	44.2139	36.5546	36.1769	38.7985	36.4789	33.2896	26.9067	24.11	20.8393	44.869	41.3937	37.839	32.7521	38.3531	49.9956	50.8264	27.8881	32.3111	28.7349	377	2.15117
378	23.8781	26.2599	20.6457	22.1371	18.4782	17.0883	23.7427	21.3002	18.985	27.6519	28.4599	23.6848	34.3313	34.1243	31.7146	21.6887	22.384	22.0326	8.64221	7.51362	8.87256	378	37.8407	30.8665	24.7505	33.1583	34.2646	29.8524	41.9067	35.6542	35.1098	37.686	35.7023	32.7735	27.1201	23.8475	21.0573	44.2727	40.9012	38.7279	31.2664	37.8955	49.6812	50.2596	27.6834	31.1328	27.1318	378	2.58013
379	24.1986	25.1849	21.6451	21.7372	18.4994	17.1921	23.9133	23.3813	19.0664	29.1948	27.8653	23.6404	35.3049	32.6019	31.4189	21.2752	22.7881	20.8718	8.9676	5.78262	9.16632	379	38.0551	29.5429	24.1863	31.3651	33.3906	31.6053	43.1385	35.6078	31.8902	35.8816	35.046	31.3948	26.1216	22.5242	20.409	43.9034	40.6464	38.7648	30.0492	38.6603	47.4708	48.8245	28.1873	29.754	26.5716	379	2.03373
380	23.1525	24.4108	21.1583	21.7707	17.6283	16.9264	22.3969	23.1865	20.8484	29.8239	26.8702	21.6832	34.1037	33.0835	31.3324	20.9729	24.0255	20.0953	9.68284	6.72431	8.30222	380	36.6918	28.8015	23.7549	31.9226	32.038	31.5297	41.6759	34.8449	31.3353	35.9637	33.6272	30.5589	25.0647	21.3341	20.7024	43.8595	40.2161	37.05	28.2982	36.8198	47.7906	47.8053	27.5994	31.1022	25.5633	380	2.23053
381	22.1976	25.2262	19.2463	22.4715	16.6639	16.1806	22.1832	24.3996	19.3549	30.5997	27.0886	20.9055	33.7649	33.0523	31.2213	21.0923	22.727	21.0294	8.38577	6.87112	9.10575	381	38.0357	27.8866	22.6816	31.7385	30.8831	30.2264	41.117	33.5506	30.0422	35.3359	34.1289	30.086	25.3396	19.8039	20.2558	41.745	39.4716	37.8469	29.2246	38.5457	46.1325	47.0534	27.089	29.4267	25.6317	381	1.98706
382	23.4111	24.5837	18.782	21.4015	17.3724	14.5293	21.3882	24.03	19.4177	31.228	27.0502	19.0768	34.2737	32.7479	29.5509	20.6693	20.9361	19.2703	9.07667	7.0156	7.45005	382	35.9634	26.9269	22.6412	30.9676	30.3445	29.0542	41.757	35.0019	28.4668	34.3756	32.1871	32.007	25.9176	19.3039	19.2266	41.7035	38.5485	36.8511	26.7868	36.1003	46.255	45.8873	26.0275	30.0486	25.0735	382	2.15858
383	21.9695	23.6321	18.4282	20.5508	16.4892	16.5612	19.9079	23.076	18.4066	30.0291	27.5836	18.6681	32.4193	31.5859	28.0029	20.2815	23.3007	19.8946	9.22044	6.4228	6.7438	383	36.6175	25.2951	22.565	30.1865	30.4723	27.8623	41.5604	33.6158	26.4235	35.91	28.6544	30.7766	25.8578	19.8087	18.8915	41.1624	38.7295	35.1051	26.0037	35.9427	48.8714	45.6754	26.3624	29.4923	24.8997	383	2.01123
384	22.0586	24.6783	17.4324	20.6005	15.9631	14.9125	19.4425	23.5078	17.772	29.2616	28.4237	19.8989	31.1645	31.5138	25.118	19.3267	21.8202	20.1057	9.28038	6.71455	7.62506	384	35.9697	25.1679	22.2387	28.9271	30.311	29.2396	41.8031	33.0982	26.6996	33.7456	30.2155	31.087	24.5576	19.894	18.552	41.1807	37.3272	34.3003	26.3176	32.9621	49.1952	45.8841	25.8346	26.8231	26.1708	384	2.27101
385	22.4507	23.1228	17.4597	19.262	17.0482	15.4427	19.6454	21.7198	17.3813	27.609	27.3239	19.6626	30.0514	31.0478	25.5376	20.4227	20.5931	20.3494	9.06495	5.13036	6.96793	385	34.084	23.9007	20.961	28.3941	29.4092	28.2215	40.6997	31.8181	26.7322	33.227	31.2075	30.7309	23.9047	19.0219	17.5252	41.1959	37.2293	33.9085	24.7538	32.6327	48.1876	41.927	24.6985	27.169	25.0938	385	2.39393
386	20.9286	25.0844	17.0364	19.1385	15.8265	15.9342	19.9367	22.1277	16.0909	27.5262	24.5731	19.3122	30.0816	31.595	28.415	18.8666	21.0668	18.2049	10.4035	6.3638	7.05901	386	34.3318	23.0889	20.0158	28.8214	28.9903	26.8114	39.3562	32.5544	24.3219	31.5163	29.8816	29.6816	24.2055	18.9451	16.8728	40.5137	36.6345	32.6498	25.1159	32.8519	46.8198	41.3806	24.3332	26.6627	23.8817	386	2.26499
387	21.0161	23.1411	16.997	19.6362	16.8818	16.9849	18.6858	21.2024	15.7042	26.432	24.3475	19.5303	30.1518	31.0013	28.3697	18.3696	20.9505	18.3347	9.57558	5.60934	7.36612	387	33.4443	23.0742	20.6173	29.7559	27.7398	27.3128	39.9854	32.0906	26.3648	34.2268	28.0728	29.3259	23.105	18.7494	16.3177	40.063	36.0465	32.7295	24.4181	31.6399	47.2705	40.1012	25.1745	27.0753	22.8558	387	2.3089
388	20.2044	20.4651	16.5054	18.9031	16.6215	16.8366	19.4007	20.2301	15.0846	24.652	24.6765	20.727	29.1213	31.3418	29.1385	18.8895	18.1921	16.9906	9.2601	5.05092	6.21876	388	32.7719	22.8879	19.5856	29.9861	27.412	27.9782	38.2688	32.2049	25.8853	32.2659	28.5172	27.9717	22.8758	19.1907	15.7986	41.6859	35.7724	31.5521	22.8688	30.8203	45.1779	40.5526	25.1019	26.8052	22.1054	388	2.06417
389	18.5306	22.1891	15.4767	19.5653	15.9286	15.5325	20.6925	21.2868	16.0307	24.6112	22.754	19.4406	27.8022	29.7694	29.7661	18.1592	21.4875	17.4273	8.72198	5.45231	6.16058	389	31.0824	21.4887	18.5607	27.8117	26.4026	27.0633	36.8816	31.9261	26.6083	32.0367	28.3736	27.7325	23.1656	17.5873	16.0409	41.0936	34.4595	32.5253	22.6303	30.0844	43.3183	40.8327	23.9496	25.8692	21.7328	389	2.21935
390	20.3725	20.7037	15.249	19.1277	15.4634	16.2488	18.4429	20.4976	15.9228	25.1864	23.1945	20.9749	27.4466	30.2831	29.7205	17.853	21.6856	17.3427	8.81031	4.76103	6.49344	390	29.7897	21.4747	17.8011	27.291	26.2578	26.1772	34.6446	32.2842	25.0127	33.3315	27.4322	26.183	22.9109	17.9034	15.4076	41.4513	34.3074	30.2442	20.0807	30.2062	41.604	38.9698	23.3188	25.2663	21.8578	390	2.15325
391	20.1116	21.044	15.4948	19.8873	15.3951	17.5287	17.9048	19.7731	15.9206	25.6229	21.8321	18.6526	26.1773	28.7107	28.5647	18.0962	20.6259	16.7817	8.36864	4.80052	5.96077	391	28.0834	20.9787	19.0333	26.5621	24.8444	26.7822	33.0014	30.8368	24.6881	33.2855	27.0066	24.8483	21.528	17.7478	15.1487	41.8853	33.882	29.3425	20.8646	30.4439	40.0521	40.148	22.8274	25.6833	20.3628	391	1.84187
392	19.9059	19.9787	14.7626	20.0609	14.4013	18.6652	16.846	19.0887	15.7643	24.6129	21.6337	18.8949	25.8311	29.5032	29.0864	18.0218	21.0424	18.2136	9.27677	5.43652	5.98176	392	28.6204	20.1526	18.1644	25.106	24.8198	26.4509	33.2409	30.977	24.8174	32.4904	25.668	24.3486	21.0598	17.6777	16.0085	40.0626	32.7329	28.7314	20.4657	28.4284	41.0698	39.811	21.5146	25.7437	19.8733	392	1.82236
393	19.6878	19.7623	14.5549	19.1041	14.8504	18.6635	18.5875	18.0682	15.9568	24.6402	20.3117	18.9074	28.1841	28.9697	28.8514	17.4411	19.9275	18.7895	8.48402	5.70969	6.3108	393	27.5516	19.3055	18.5881	24.1629	23.689	25.9487	33.147	31.2448	25.4775	30.7694	26.312	25.0789	21.126	19.0471	15.7832	39.3988	31.6521	28.188	21.0617	28.6693	42.5121	39.1646	23.0532	26.0546	18.4522	393	2.04113
394	19.2074	20.2416	14.9803	19.2541	15.5334	18.5323	17.4259	17.6864	14.4319	25.2844	21.7163	18.1353	26.5704	28.8766	28.9835	17.3434	19.9233	17.9938	8.31411	5.6256	6.00512	394	27.4462	18.677	19.4632	24.3563	22.3418	27.5471	33.5981	30.0542	24.812	30.4585	25.3927	25.9382	21.6733	17.0477	15.9392	38.0844	32.0089	27.9654	20.9736	28.7795	41.4163	40.7295	22.576	26.5026	17.7834	394	1.70398
395	19.8466	19.9748	14.3456	18.4755	15.3579	16.4072	17.2766	19.0961	15.7865	24.3294	21.1923	17.9102	26.2112	27.6883	28.4869	17.6595	18.6555	18.0571	6.84442	4.55011	5.19158	395	26.4811	18.1625	17.8765	23.5797	21.7838	26.2183	32.9793	29.2056	24.7289	30.1875	26.0762	24.2896	21.1362	17.7638	14.7706	38.0188	32.2023	28.699	22.759	26.8846	40.0932	39.9129	22.9466	26.7314	17.4693	395	2.46852
396	20.1116	19.2401	15.1072	18.8874	14.1985	15.6592	15.7724	18.4561	16.5153	23.4766	21.0685	17.5451	26.801	27.4846	28.1137	18.4539	18.439	15.9339	7.87694	5.25626	6.76621	396	26.5352	19.077	18.032	22.2023	22.9606	26.3881	32.9584	27.5174	24.28	28.9929	23.3218	23.1807	22.0493	18.131	14.8006	37.5101	31.2784	28.0432	21.4661	26.9984	40.3129	38.1071	22.1389	26.1559	17.0494	396	2.18038
397	19.8615	17.0803	15.3402	19.3287	14.6689	16.6782	14.5899	19.2518	15.6311	24.2752	20.2262	17.5835	26.0431	25.9336	28.2892	18.0955	17.7795	15.8342	7.19911	5.45324	5.89783	397	27.3247	18.9254	17.7125	23.5393	22.1628	25.8373	30.8273	27.0753	23.068	29.2729	24.5134	23.3515	20.7338	17.3825	15.0081	37.5429	32.3155	26.8861	21.9182	26.5464	39.5247	39.2049	21.3402	26.04	17.8076	397	2.0506
398	19.2794	18.2254	16.0495	19.5131	16.695	16.7636	14.6983	20.0658	17.3985	23.181	20.5854	18.4603	25.6035	25.6167	28.8274	17.3987	18.143	16.6559	7.42355	4.39866	6.32224	398	27.3935	18.2607	17.6556	22.6411	23.1908	26.4764	32.0295	26.8778	22.1104	30.2886	24.2793	22.4987	22.0722	17.0701	15.0227	37.6703	31.9856	26.3946	22.7081	26.8733	38.5197	39.0974	21.0288	25.123	17.3404	398	1.8528
399	18.3431	16.5566	15.1164	20.8006	15.8719	16.7337	16.4507	20.2175	17.1171	22.8753	20.1687	17.924	24.3472	25.1457	29.4704	17.0109	15.5067	14.8924	8.07299	4.08833	6.62935	399	27.4052	17.3631	17.1657	21.5869	22.934	26.7621	30.926	25.1841	22.3248	28.1986	23.4272	22.5272	21.843	17.7033	14.0242	38.5919	30.8931	26.4077	22.2879	26.1153	36.882	39.271	21.8847	25.5189	17.9987	399	1.6917
400	17.54	17.5849	14.485	18.5733	15.5097	15.5422	16.5917	19.01	16.3401	23.0338	21.509	16.3833	23.5063	24.2437	28.6545	17.4789	16.1256	15.1209	8.1744	4.48136	6.09621	400	26.7775	17.3725	18.0039	22.6064	24.1458	25.391	31.2659	25.3891	21.5353	27.5661	24.1098	21.2286	21.326	16.2988	13.5465	37.6544	30.4171	24.8682	22.0087	26.7225	35.4127	38.3265	20.2942	25.86	17.1756	400	2.1549
401	18.8325	16.675	14.0114	18.3309	15.2218	14.579	16.5486	18.5426	14.9134	21.7706	21.8461	15.9086	24.9158	24.8528	27.8469	15.969	15.7805	13.5342	7.43798	4.83629	6.37565	401	27.1399	16.7568	17.0845	21.1347	23.4625	25.5755	30.6207	24.4204	21.9264	25.9337	22.4021	20.8738	21.6107	16.5356	14.0599	36.2297	30.3107	23.4509	22.7266	26.6506	36.7574	37.6097	20.4555	25.6948	16.4955	401	2.4371
402	18.5291	16.0645	14.6176	19.4953	15.4634	13.2379	14.3783	17.7986	14.5563	21.8375	20.2432	16.7454	24.8024	26.7471	26.59	16.8097	17.469	13.471	8.67916	3.7334	5.98748	402	26.8141	17.1603	16.857	22.0195	24.022	24.684	30.7382	25.3989	22.1248	25.8335	21.4301	20.1845	20.7208	15.8916	13.2037	36.6261	30.1069	23.6385	21.1497	25.3167	36.9883	38.3133	19.9289	25.0316	15.8642	402	2.72717
403	17.5947	16.8989	14.9991	19.9209	15.1677	12.5383	14.8646	17.5777	15.274	22.5027	21.2366	17.5783	24.4762	26.0983	26.1484	16.5741	17.2771	14.2403	9.01042	4.21934	6.24785	403	24.8835	16.1904	17.4355	21.9558	23.1464	24.9742	30.7362	24.2016	22.0844	25.4279	19.4688	19.9327	20.9413	16.0492	13.181	38.3401	29.1617	23.2072	22.3902	25.9183	35.6846	38.4173	20.6712	24.148	15.5497	403	2.48218
404	18.115	16.7747	14.8079	20.2541	14.9451	14.3735	15.3218	16.6859	13.7713	22.3215	21.2434	15.4366	22.7402	26.6094	25.3621	15.5475	17.1281	12.407	9.19024	3.61772	5.60073	404	24.6877	16.5653	18.4399	21.9501	22.3978	24.6438	31.2025	25.1908	21.7384	25.7741	18.5419	18.203	20.9007	15.884	13.0441	38.0396	28.3481	24.2221	21.2722	26.012	35.591	37.8348	19.727	24.4188	14.6575	404	2.04648
405	17.6518	16.7104	14.6103	19.3809	13.6067	12.8428	14.9443	17.0547	13.7912	20.5776	21.7073	15.315	23.7882	26.723	26.3034	16.5661	20.0031	12.7009	8.95138	4.16359	5.56592	405	23.5395	16.8927	17.0645	22.6382	22.6429	24.3215	30.4943	25.6667	22.1186	24.303	21.6149	18.8881	22.0304	16.1368	13.301	37.397	28.9642	23.1966	20.1956	26.464	35.7246	38.8151	19.3892	24.1222	14.7333	405	1.76235
406	17.5743	15.8036	16.844	19.1974	15.7911	11.778	13.9543	17.2812	14.1045	20.2198	21.3392	16.338	23.9232	26.2627	26.1978	16.4138	18.298	12.2997	8.09462	3.47602	5.1272	406	24.7418	16.4068	17.6714	22.1081	22.1051	24.3252	30.3831	25.2202	22.4153	24.2823	20.4811	16.2199	22.5057	15.8188	11.1275	36.0694	28.8201	23.599	19.8264	26.741	35.5852	36.6966	20.0383	24.03	14.3091	406	2.02708
407	18.7129	16.3008	17.1766	17.7366	14.2634	12.4833	13.8855	17.9043	14.5182	19.6765	22.2104	16.1466	21.5836	27.1723	26.0197	16.6062	17.606	11.979	8.68998	3.49553	5.20684	407	24.7213	16.7997	17.5255	21.4408	19.0933	23.0988	30.2868	23.9248	22.0355	25.4017	19.1536	16.2902	22.3643	15.8396	11.7515	34.3941	28.3309	23.0432	21.0652	26.3204	35.1771	36.038	18.8488	24.812	13.77	407	1.88178
408	17.1456	15.0907	17.7911	17.6653	13.9426	12.8217	12.9642	16.6046	14.2178	18.9801	22.8433	17.4175	22.6732	26.2032	25.7726	15.6212	17.1546	12.894	7.63988	2.59055	4.84537	408	23.9008	16.8506	16.1474	20.7487	20.4264	23.7675	30.8406	24.2087	22.0945	24.7158	18.6439	17.7284	21.3662	15.0335	12.1311	34.6511	28.8101	23.3783	20.7118	25.0826	34.6338	38.1968	18.4595	23.924	12.8973	408	1.88792
409	17.6246	15.0303	17.7076	17.6077	14.8275	12.5287	11.9115	15.7867	14.0323	17.6958	22.9502	16.3328	20.704	25.2616	25.9834	15.4357	17.8692	13.5075	7.20768	3.83003	6.40903	409	24.7579	15.5966	16.2502	20.3687	21.0586	23.7096	31.4577	23.9637	21.1532	24.4311	18.2433	18.7795	21.1114	14.1754	12.0667	34.086	28.2919	23.1869	21.0459	24.6182	34.7228	38.452	20.0298	22.532	13.3395	409	2.03831
410	15.4718	16.0824	17.8285	18.1456	15.0207	12.123	10.0647	18.1674	13.9531	17.6281	24.0057	16.1216	20.8163	25.6533	26.306	16.1442	16.0175	14.1437	7.6187	4.22724	5.37565	410	24.1149	15.9812	16.2875	19.4848	19.5274	24.3865	30.2467	24.3493	19.4357	25.1093	19.2348	16.6967	21.1921	15.1347	12.1838	33.632	28.0684	21.3348	20.1553	23.4106	35.105	37.7812	19.0803	23.3081	12.6407	410	1.57984
411	14.9091	15.8262	17.5638	18.071	13.9327	12.9841	10.238	18.1491	14.3797	16.8292	22.94	15.6965	21.1168	25.2006	25.861	17.6679	17.5159	13.6105	7.02425	3.73758	5.78385	411	23.3565	14.1009	14.3259	19.5929	18.8014	24.0943	30.981	23.5443	19.7091	25.1175	16.7709	17.9784	21.6445	15.2955	11.5841	35.253	27.5679	21.9079	20.2548	22.9895	35.6241	38.219	18.0209	23.4447	12.2368	411	1.90211
412	15.0913	16.2518	17.912	18.4999	13.1035	11.7389	8.96886	17.2055	13.2544	16.4095	22.1811	14.705	21.559	23.5027	25.7704	16.7856	17.2425	13.6922	5.94711	4.30435	6.27599	412	23.3474	15.1182	14.4999	20.0753	18.6131	24.6964	30.8345	21.229	19.9634	25.6722	16.6303	18.1349	21.5682	14.9775	12.4861	34.1732	27.1084	22.243	20.1044	22.0835	34.5629	38.1632	17.7293	21.2743	11.5313	412	2.10764
413	13.7444	15.732	16.5849	19.2243	13.0983	12.2612	8.93751	16.0228	13.6938	16.0113	21.8363	13.56	21.9283	22.8933	25.084	16.2118	18.7329	14.9148	5.71591	4.96451	5.70708	413	23.3097	15.4264	13.7791	20.8597	19.3484	23.1185	30.656	22.8402	21.0321	24.9252	17.4293	18.3966	20.4652	14.6779	11.8102	32.7912	27.3159	22.8067	18.7854	21.4485	33.7336	38.9148	17.4767	21.2576	11.318	413	1.71348
414	14.842	14.6355	17.61	19.3784	12.1222	11.4828	10.3394	15.0467	14.5479	16.7169	21.3873	12.6422	22.1236	21.7549	24.8987	16.0011	18.4065	14.8848	5.779	4.4795	4.87636	414	23.276	15.3098	14.7173	19.77	19.1928	21.8765	31.2085	20.7829	19.2074	25.6335	16.4463	18.1806	20.9724	13.5685	12.5112	32.5394	27.1461	21.1088	19.0973	21.7948	33.6342	34.7776	17.9438	20.6433	11.0902	414	1.77282
415	14.9616	14.8711	19.3142	18.8832	13.4351	11.4331	10.0164	16.6938	13.4398	15.452	21.3251	12.0611	23.2225	24.0637	25.0885	15.0894	20.1215	12.8061	6.04401	3.90296	4.95076	415	23.7514	15.0286	14.1081	20.5985	19.2356	21.6771	29.7945	20.9498	18.7348	26.3774	15.4846	16.9218	20.1546	13.9518	12.1883	32.9914	26.8081	21.5371	18.9402	20.9861	34.11	32.8138	18.8005	20.5396	11.5363	415	2.0184
416	15.9694	17.5483	18.7676	19.5943	14.831	11.4463	9.90577	15.0458	13.0141	15.7854	21.32	11.1605	23.0213	23.9085	24.8216	14.2892	20.397	12.8821	6.19859	5.01469	4.89258	416	22.2307	15.5066	14.5642	19.466	19.6536	23.4757	28.0498	21.4709	18.5138	26.0691	16.5147	16.7329	16.1678	14.5494	12.5655	31.5895	26.945	22.9767	18.9307	20.9073	32.4083	31.8315	17.8996	20.4518	12.2383	416	1.60151
417	15.3828	16.8117	17.8108	19.223	13.0365	11.9686	9.44558	16.2694	12.5698	14.9743	19.9384	11.9029	23.6625	23.5782	24.0255	15.249	17.5078	13.3444	6.79214	5.44813	4.54875	417	21.1971	14.5511	14.8209	19.173	18.2838	23.4724	26.8929	22.3918	19.4881	24.9347	15.5334	17.5396	18.6354	13.9186	13.1202	31.7925	27.4511	22.0598	17.054	21.1136	30.5924	29.7959	16.3484	20.7989	11.5649	417	2.04655
418	14.7529	16.8814	17.1681	18.8397	13.3914	10.9209	8.22829	16.6764	12.6707	14.6337	21.6358	13.5324	23.5803	24.5641	24.536	15.6781	19.7661	13.2309	6.84532	5.50109	5.63745	418	20.0706	13.7095	14.989	18.8804	17.7266	24.116	27.2914	20.9082	19.1747	24.6659	16.2314	17.659	18.88	12.9481	13.3451	30.1584	26.534	22.6784	17.2412	20.6696	29.8568	30.3595	16.9399	22.4606	10.7371	418	1.59204
419	16.2008	16.2121	16.6737	16.9244	13.2319	11.0842	9.59622	16.4863	12.1941	15.2342	20.5211	11.9382	22.7803	24.5675	23.7486	15.2375	19.2087	12.2151	6.90391	4.63838	5.70326	419	19.2855	14.002	13.4262	18.4592	18.0225	23.3791	26.5964	21.1152	19.1693	24.6083	16.6689	17.4391	18.9686	12.8001	12.8933	29.6925	26.7728	22.804	17.3585	20.5281	28.5751	31.1535	17.4516	21.9697	10.7574	419	1.5879
420	15.6194	15.343	16.4319	17.2443	12.3409	10.6402	9.31889	15.1062	12.0521	15.3948	19.8256	11.3597	22.7052	25.5698	22.4768	15.9843	19.2822	12.3459	6.65333	4.06138	5.01656	420	20.3158	13.4156	15.0833	17.9515	17.4497	24.1132	27.0285	20.9035	18.4074	23.1789	16.9098	17.6249	18.4023	13.1089	12.8034	28.4044	26.7985	23.2553	17.7179	21.8772	28.4057	28.9815	17.0117	21.513	11.8707	420	1.67441
421	14.8107	14.6663	17.8393	16.36	12.4019	10.4875	9.51829	16.4233	12.2251	16.0058	20.0972	12.074	23.9377	25.3913	22.7212	15.1688	19.5641	13.5718	7.57498	3.69995	4.51919	421	21.8347	12.8801	13.567	16.7035	16.9578	23.3491	25.34	20.4527	18.4832	22.2952	14.9141	16.2557	18.2988	11.974	12.8747	29.2449	25.4423	23.8867	17.8028	20.4681	28.2044	29.5079	16.2722	22.2723	12.0567	421	1.61003
422	14.0343	14.6515	16.7608	15.9614	11.83	10.0801	9.19394	14.507	11.4082	15.3178	18.8548	12.4189	23.2036	24.1206	23.6378	15.2154	19.8417	12.8412	6.80747	3.30459	5.2097	422	22.0122	12.952	14.3005	16.8178	18.0084	24.5365	25.1847	21.0178	18.9056	22.4525	17.3456	17.4469	17.9424	11.0119	12.4128	29.4327	25.3055	23.5971	16.1216	21.613	28.1817	30.5689	16.4283	22.4483	12.8544	422	1.78809
423	14.7529	14.9112	16.4222	15.329	11.8909	10.7964	9.32891	15.3097	12.1233	14.198	18.765	12.0167	23.4788	25.0961	23.8945	14.7359	19.4846	12.8177	6.58303	3.6284	5.13721	423	19.549	13.0088	13.6232	17.8373	18.5797	22.6808	24.3682	20.3856	19.2023	21.7757	18.4404	16.7592	17.6644	11.4703	11.3143	28.2758	24.8267	23.25	15.2718	20.3033	27.1979	31.5827	15.8351	21.6572	13.4438	423	2.13122
424	13.7779	14.4681	16.2114	15.1359	12.6863	11.3908	9.36461	16.1889	10.9781	13.3469	19.9193	11.9451	22.7037	24.5233	23.5689	14.9214	19.8011	12.5979	6.81423	4.01864	5.11671	424	20.0047	13.7637	12.4895	17.7524	17.3912	22.2349	25.328	19.8338	18.6062	21.2145	17.2641	14.2889	17.4857	11.4963	10.7093	28.4428	23.0427	23.5114	16.4012	19.2396	25.9219	30.5742	15.9924	21.2827	13.3899	424	2.72409
425	14.9802	13.8646	15.4558	14.4849	13.0222	11.0829	8.76772	13.5713	11.4653	12.9289	20.007	11.0545	21.9067	24.5099	23.353	14.495	16.7625	12.9164	6.74843	4.19332	5.04088	425	19.2635	13.6181	11.9153	19.2828	17.3041	20.8835	24.6177	18.6833	19.146	21.8595	17.9956	14.4786	16.4906	11.4375	9.98519	28.1631	22.4366	22.7145	15.2362	19.5641	25.7695	31.9883	15.3194	21.9026	13.7751	425	2.97153
426	13.416	12.466	14.9758	15.1993	11.6341	9.30089	10.0316	15.0045	10.5577	13.2287	19.4073	11.0963	21.3344	22.9818	23.1902	14.4041	17.1157	12.6977	6.64522	3.71992	4.29505	426	21.5364	12.9147	12.7254	20.0953	14.9732	21.3471	24.7004	18.0542	17.2976	19.6745	16.5139	13.4521	15.1771	12.0952	9.26636	27.2495	22.5422	21.4593	15.4163	20.6266	26.5646	33.6283	14.8706	21.8978	13.5524	426	2.68275
427	14.0999	13.6064	15.1827	14.668	10.7242	10.3102	10.544	14.2344	11.2131	12.3515	19.7733	10.5902	20.0115	24.2655	22.4948	14.0147	18.298	12.0549	6.74843	3.93874	5.15581	427	21.3581	12.1925	12.3059	20.8972	15.9585	21.3155	25.5728	17.8394	17.1978	20.2121	16.6116	13.2176	14.8617	11.2335	8.95152	26.8854	21.2538	20.9764	15.6063	20.9049	24.8229	32.5294	15.6823	21.4665	13.6516	427	2.18483
428	14.2684	13.2595	15.059	14.3502	11.3985	9.60008	9.52439	14.9871	10.5427	13.455	20.5803	10.8502	21.4251	24.6308	24.0345	14.1048	18.6636	11.7632	5.08269	4.18868	4.98557	428	21.5547	12.8041	13.2946	21.3478	17.3227	21.2304	26.2027	16.3237	18.1826	21.0373	15.7055	15.4508	15.0515	12.0532	8.97218	27.7055	22.1179	21.369	14.8757	20.7287	25.2609	32.5673	17.066	21.6897	12.5762	428	1.98311
429	13.8387	13.661	14.8055	14.4994	11.1928	10.5421	9.47127	14.9775	11.052	12.772	18.602	10.2009	20.3983	24.8844	22.5071	13.8032	17.6262	11.0608	3.6743	4.43258	3.4734	429	21.6488	13.008	12.4699	19.9117	16.8659	19.9583	26.5892	15.5304	18.0801	20.7634	15.8512	13.2146	13.1165	11.1723	10.3312	27.6539	21.5488	18.8638	15.4313	20.3579	25.2047	34.576	16.5195	20.7354	12.7848	429	2.26069
430	13.6296	14.9116	14.3838	13.9648	12.0098	9.33917	9.32847	15.8767	11.6618	12.8902	17.0769	9.71852	20.8048	25.8138	22.7893	13.3413	17.0567	10.9017	4.60677	4.26765	4.7066	430	21.7377	12.7943	13.308	20.6564	15.8548	19.0734	25.3653	16.6138	17.3143	21.3155	16.8796	12.7339	13.7532	11.2791	10.2769	26.6021	21.8852	18.6848	15.1296	19.4877	24.2133	34.4999	16.8803	20.3919	13.1079	430	1.40363
431	16.3719	15.461	15.2671	13.9694	10.7129	10.3362	8.06851	15.9259	11.1002	10.7258	17.3523	10.1156	20.5954	23.6831	22.4244	14.2022	19.0476	10.6252	5.18139	4.48043	5.08523	431	21.8705	13.5492	13.4297	19.9721	16.108	19.1108	25.6911	15.8493	18.5329	21.5452	17.1031	12.5334	13.7028	11.3903	10.1059	26.3663	22.2247	18.8172	15.3113	19.842	24.3859	34.8762	16.4323	21.3033	12.7922	431	1.94372
432	15.5076	14.4167	15.0016	14.9979	11.0804	8.4891	9.62583	15.3836	11.7857	11.3633	16.1108	10.3294	21.1265	23.8376	22.4001	13.5123	18.2899	9.973	5.07368	2.78799	5.16106	432	22.6772	12.6761	12.7504	18.8151	17.6799	17.8112	26.6405	15.3035	17.373	22.2736	16.9395	12.664	13.1374	11.9364	10.4062	26.4618	23.0824	17.9049	16.3862	20.103	25.6622	34.8137	15.9916	20.8089	12.091	432	1.88259
433	14.8476	13.8241	14.769	14.4969	10.2521	10.4466	9.86833	14.3862	10.2931	12.5227	15.5783	10.8588	19.0565	23.4017	22.8118	14.2949	18.6248	8.2833	4.5288	3.25535	4.45671	433	23.1311	11.6829	13.1368	18.7024	17.2707	18.7483	26.9997	15.3753	16.8107	22.3971	17.4157	13.7819	12.116	11.3811	9.41993	25.5431	24.1564	17.7165	16.9857	19.3808	25.2757	33.0143	16.0139	21.0543	11.6285	433	1.57873
434	14.6895	13.6617	13.6572	14.4169	9.55912	9.7994	10.4086	13.4352	10.9741	13.2388	15.2255	10.2164	19.2982	23.6663	20.9468	13.6688	16.7851	8.4026	5.05836	3.33433	5.36564	434	22.4265	11.856	12.6088	19.2097	17.2424	17.8852	26.216	15.2752	18.8862	20.6288	16.6443	13.5621	11.6588	11.5456	10.8377	26.7108	23.9822	19.5298	17.6022	18.2544	27.1773	31.9737	15.1905	21.0182	13.8556	434	1.66817
435	14.975	12.3905	12.512	13.0038	11.3583	9.88872	10.3359	13.8766	10.7878	13.0605	14.4776	9.89484	20.154	23.1378	20.851	13.489	17.9123	8.66217	4.55404	3.60935	4.50679	435	21.5045	12.6035	13.4693	18.8612	18.8389	17.6489	26.7625	15.2669	19.0295	20.514	17.5016	13.8307	11.5411	11.2399	10.9787	26.023	23.8622	19.1383	17.7526	18.1538	27.8694	32.6984	15.0202	20.6655	13.0938	435	1.74017
436	14.9303	13.4659	11.9356	14.7136	11.348	8.5617	9.51176	14.0157	10.7679	12.8427	14.9497	10.8665	19.7954	22.8174	21.9023	12.2082	16.7727	9.26155	4.50356	3.44257	4.08714	436	23.1175	12.5474	12.6842	18.1597	19.034	16.9079	25.9985	14.7981	17.9061	20.2013	17.1107	14.6256	10.6473	9.05891	9.81663	26.8654	24.2371	18.1448	17.4568	19.7644	27.2962	32.3075	15.6194	20.0754	13.3094	436	1.95093
437	15.1606	13.7782	12.1606	14.7215	9.8881	9.87816	10.3512	13.5722	10.8679	14.4533	14.4487	11.7559	19.0747	21.4536	21.6268	12.9973	18.9759	8.60179	5.29542	3.97637	3.79338	437	21.5774	12.8357	11.9161	18.5102	17.0131	17.9843	26.1064	15.0584	19.146	21.3702	16.8189	14.72	10.4823	9.20253	9.23354	27.1268	23.6611	18.6524	16.9585	18.9509	26.6604	31.8704	14.028	21.0853	12.0844	437	2.12018
438	14.3496	13.9534	12.2277	14.5827	11.2477	9.07561	10.5388	12.8669	10.2382	15.3271	13.5391	11.2282	18.6388	21.0471	21.3888	13.3371	20.001	8.80352	4.15473	3.90018	4.41666	438	21.1638	13.2899	12.3794	17.7748	16.922	18.7397	26.1506	14.5326	18.6299	21.6557	16.5054	14.7787	9.86959	9.62577	9.59863	25.6394	23.6764	18.572	16.7969	19.9011	25.7479	32.4375	14.3228	19.5364	11.5184	438	2.14751
439	14.3724	14.9517	11.4432	13.5993	10.4185	8.07287	10.7308	13.7026	10.4555	15.018	13.9533	10.6243	18.0025	21.6634	20.8098	13.7895	16.7279	10.2947	5.03087	4.27741	4.77622	439	19.7979	12.5082	11.5932	17.4426	15.8097	20.3159	25.9612	14.7333	18.6105	22.7665	16.2709	15.0287	10.3177	9.86139	10.5748	25.6605	24.0248	18.2046	16.7108	18.441	26.1575	31.3887	15.306	19.7485	12.2516	439	1.71083
440	14.5133	14.4334	10.8475	13.8082	11.2602	8.08827	10.056	13.7548	10.2842	14.1921	14.3568	10.8928	18.3201	20.5483	21.0168	14.7664	16.4746	9.94914	4.43371	4.99053	4.35323	440	19.4637	12.3182	11.7644	18.8363	16.0076	18.341	25.8336	13.6621	17.8766	21.171	15.8418	16.0483	10.9733	9.9374	9.75098	25.6881	24.3145	18.9277	15.2283	19.5513	24.905	33.5118	15.0384	18.9328	12.4809	440	1.96061
441	13.6277	13.3997	13.1571	14.5959	11.4115	8.67302	9.51437	13.6826	8.86157	13.7363	14.2031	10.8286	18.5734	20.1501	21.3222	13.2222	16.399	10.6938	4.58604	4.23188	4.34036	441	19.5893	12.9497	13.2376	17.6744	15.3009	17.951	26.2429	15.2972	18.7495	21.3886	15.773	16.8649	10.9257	9.81299	11.4305	25.5594	23.6399	17.0772	15.9905	18.0481	25.9698	31.5713	13.6129	19.0122	11.8707	441	2.01704
442	13.9184	12.4014	11.6609	13.6971	11.0389	8.33863	9.59013	13.6578	8.70536	12.8385	14.2069	10.3445	18.0624	20.0262	19.9381	11.7993	14.1919	9.75609	3.99384	5.27299	4.36182	442	17.8427	13.4525	12.5434	16.6419	14.314	16.7319	24.0712	15.4605	17.736	21.0919	14.4175	16.6217	10.0696	9.43895	10.1716	26.3579	23.9048	16.6173	15.297	20.0266	26.0761	33.9767	14.2806	18.5075	11.4449	442	1.73103
443	13.9412	13.3748	11.8055	12.4137	11.3177	8.45831	10.4687	14.2622	9.74128	12.1884	14.7083	10.3496	18.4867	20.1314	20.5122	12.0352	15.6314	10.5973	5.29226	5.04628	4.96029	443	19.2079	13.9907	12.0896	16.5791	14.974	16.2268	23.995	14.6328	17.6483	21.8471	13.5747	16.2449	11.0469	9.21973	9.8847	26.1089	22.4153	16.8478	15.5059	20.3777	24.6867	30.4824	13.7191	17.4082	10.9184	443	1.78007
444	14.2781	12.7023	12.8779	13.666	10.406	9.33345	9.81347	13.4887	11.3604	11.3848	15.1952	9.86811	18.4019	20.1726	20.8704	12.8102	14.051	9.95998	4.89972	4.73501	4.70421	444	18.085	13.8635	11.4889	16.0077	14.4511	18.4919	23.5448	15.1515	17.4514	19.5782	13.3801	15.6465	11.6671	8.9097	10.6603	24.6659	21.8185	15.5335	15.3334	19.3148	23.2	31.1793	13.1243	17.9336	11.2703	444	2.27031
445	13.7496	12.7117	11.7754	14.1028	11.7483	9.29341	9.34197	14.6475	10.8259	12.0938	13.4302	10.0151	17.2888	19.5388	20.0863	12.5697	14.4145	10.4448	3.74686	5.04256	4.57975	445	18.5608	13.2869	12.4845	16.6872	14.2012	16.3419	23.2988	15.5344	18.7542	21.1938	14.0628	16.3544	12.3262	9.73698	10.2911	26.4434	22.9764	16.2532	15.5837	19.3985	23.6827	31.4033	14.4193	17.2894	11.1508	445	2.35627
446	13.8648	12.6599	12.1999	13.6151	13.4666	10.1677	10.0712	14.3336	10.5192	11.5156	14.8871	10.426	17.1445	19.6021	19.7521	11.5813	10.9982	8.6759	3.99068	4.81306	3.65748	446	19.4934	13.7683	13.0094	15.4723	14.7918	17.0612	21.778	16.4269	18.0801	21.3211	14.4825	14.6959	11.6758	9.05211	9.14318	26.256	22.8239	17.1046	16.9458	20.5096	23.2104	32.0634	15.5059	18.8863	10.684	446	2.05117
447	13.0675	13.5068	12.998	12.0072	13.2959	9.41309	9.30104	14.6888	10.6644	11.3991	14.5674	10.7989	16.728	21.0875	19.8187	12.1448	10.3165	9.22937	4.38413	5.92803	4.46101	447	19.1087	12.9527	13.1945	15.5515	13.3808	16.891	20.6083	17.219	17.0444	22.2887	13.4434	14.3428	11.7498	9.22653	9.42358	26.9989	23.0427	17.4972	15.7247	20.5478	25.8326	32.4711	15.1661	18.6532	9.70855	447	2.00347
448	13.0034	12.1966	13.3455	12.8973	12.5446	8.60218	8.58094	15.8885	10.9321	11.1632	14.1618	12.2154	18.2974	20.8133	20.5935	11.027	10.6351	10.4256	4.27326	4.4428	4.29839	448	20.0515	12.483	13.0806	16.4734	12.6914	15.284	20.9261	17.3379	16.5093	21.3134	13.869	14.6843	11.8589	9.25853	7.76063	25.8208	23.4536	18.613	16.1686	20.0483	24.7587	31.9265	15.377	18.6484	11.2078	448	1.91669
449	13.3918	11.8816	12.9675	12.5861	13.5847	9.09189	8.07548	13.5261	10.7675	10.4268	14.0312	12.1219	18.1048	21.7805	20.7117	9.99049	10.4797	11.0991	4.53196	3.97358	5.523	449	18.5469	11.8613	11.6082	16.9084	11.3365	15.8466	22.2122	17.2775	16.0911	20.225	13.0691	14.0535	12.4475	9.21733	8.24404	25.6474	24.2499	18.6141	16.3996	20.3881	24.9896	31.8	15.0688	18.38	11.9864	449	1.67954
450	10.7937	13.1116	12.7892	12.0661	11.9882	8.45567	8.94447	13.4235	9.82536	9.55049	13.8469	12.6952	17.969	21.4571	20.2559	10.4513	11.9008	11.2376	3.63329	3.14478	4.57975	450	18.5707	12.3528	12.4318	17.4087	12.591	17.0973	22.048	16.56	16.2134	20.4064	13.6524	13.6888	11.8663	9.35574	8.00659	27.4233	23.9413	18.5656	15.9388	20.8747	24.1881	32.1216	14.6026	18.8641	11.2328	450	1.87575
451	11.043	13.4184	12.3899	11.4362	12.8441	7.29937	7.96707	12.9513	10.5263	8.42057	13.4787	11.9098	17.991	20.8431	20.4688	10.1489	11.7969	11.2954	3.94607	4.7889	4.8611	451	19.4238	12.7811	11.455	17.2492	12.2205	17.8281	21.9257	15.768	15.2388	19.9412	13.6851	14.977	11.5324	8.57567	8.67112	27.321	24.1981	16.9749	16.7649	20.9905	23.6233	32.0377	14.7307	19.542	10.5445	451	1.60052
452	10.2876	12.29	12.3618	11.2485	12.5666	8.23875	7.75853	12.5212	9.7997	8.16574	13.7311	10.5096	17.7872	20.2249	21.5321	9.91986	11.4903	8.76483	4.5617	3.76545	4.98986	452	18.2954	12.5113	11.9896	17.5226	12.7124	17.8149	21.8189	18.3844	15.4248	20.0508	13.2569	14.9287	11.254	7.77159	8.87777	26.6984	24.3651	15.9806	17.0619	20.5039	24.6445	32.0555	13.3574	18.7156	11.8078	452	1.6819
453	10.5675	11.7889	11.4215	12.5161	11.5641	8.49086	8.22176	13.0078	10.2869	9.31837	12.6445	10.9859	16.8567	19.2833	21.0411	10.7491	11.1759	8.99656	4.77848	3.01145	4.81914	453	20.0091	12.7736	12.3844	18.0193	12.3387	18.8889	21.2584	17.0929	15.7001	19.8005	14.9158	13.528	11.5478	8.9137	9.11441	25.3888	23.3665	16.894	16.5477	20.7102	25.6049	32.0194	13.0201	18.5357	11.7914	453	1.71494
454	11.5924	12.1662	10.9359	12.0308	12.1745	9.17901	7.46422	11.9934	9.5041	9.20609	13.9201	10.3729	17.0742	19.6322	21.202	10.2822	11.6517	9.02042	4.60947	2.65326	4.89878	454	19.3118	13.4295	12.4306	16.7835	12.1464	17.8754	20.6966	14.736	15.4655	18.9426	15.0296	14.0359	11.3352	8.15963	8.79876	25.0571	24.5794	16.468	15.641	20.2337	23.972	31.6331	12.7156	18.5091	12.0418	454	1.71574
455	10.358	9.98304	11.9409	11.0454	11.9367	7.77852	8.11771	13.4409	7.6358	9.03957	14.0976	11.4804	17.6696	20.3271	21.4475	10.5685	11.6129	8.55046	4.40171	3.05698	4.47388	455	18.9952	13.3362	12.1197	15.7331	13.8952	16.9206	20.0325	14.8656	16.0802	18.3836	13.9986	13.9233	10.7827	7.82999	8.74325	24.7462	24.0199	17.7627	15.4214	18.8314	24.0682	32.0802	12.7687	17.9062	14.1419	455	1.60227
456	11.2879	10.323	11.3098	12.1406	11.6419	8.11907	6.60089	12.3934	8.05531	9.4256	14.378	10.3367	19.1163	20.2653	21.305	10.1806	10.7902	7.3394	3.79373	2.58451	5.59787	456	19.978	11.87	10.7996	15.4539	12.2298	16.2112	19.8439	14.6367	14.5685	18.7814	14.0921	12.3308	10.1303	7.67638	9.37252	23.7695	23.574	18.9258	15.5778	19.0229	22.0231	31.1603	12.519	19.2684	12.7688	456	1.69277
457	12.5558	10.3292	10.6636	11.8497	10.9766	8.44951	7.82688	13.6905	8.50711	9.76243	15.6558	9.99658	17.7674	19.2672	21.3263	10.4322	10.6736	7.97024	3.85953	2.59241	4.64317	457	18.0484	11.7232	10.2709	15.1074	12.8245	16.7521	21.524	14.4871	15.4562	16.817	13.4111	12.3562	8.96119	7.81719	8.77242	24.1032	24.1717	17.7574	13.888	18.8676	22.5653	30.888	12.5709	18.4471	13.1723	457	1.61018
458	11.8417	10.2692	10.6688	12.2861	11.1859	8.48515	9.36896	11.8629	8.47879	8.67498	14.7305	11.0911	18.779	19.5918	20.3184	11.5783	10.3921	8.08592	4.35709	2.17336	4.7209	458	20.3853	11.6874	10.7277	14.1317	14.0951	16.1039	21.2263	16.8004	14.1868	16.746	13.8334	13.459	10.6	6.90151	9.24408	23.3782	25.0081	16.5872	15.0415	18.5037	21.7238	31.5974	13.3173	18.1211	13.6419	458	1.59301
459	10.5898	10.571	11.3235	11.5953	12.3081	10.1677	9.06464	10.4076	8.25355	9.83518	14.1124	10.0992	17.339	19.4575	20.2267	11.6508	9.18715	8.68458	3.87441	3.72085	3.87779	459	20.2784	11.2388	10.2766	14.372	13.9016	16.7989	20.2973	15.5344	14.9875	19.0841	12.7892	13.0007	9.41244	6.96991	9.10347	23.4094	25.6892	17.8541	13.5009	20.0181	22.2029	32.0645	12.9419	18.2589	12.3063	459	1.70035
460	11.3293	10.453	11.6079	11.3773	11.9778	9.17461	9.08641	11.7725	7.76015	9.05891	13.1152	9.61334	17.059	18.8897	20.3277	11.5466	11.3617	8.16979	3.66168	3.14199	4.5807	460	19.5483	11.6344	10.0804	13.7925	14.0488	16.5922	21.0858	15.3317	14.8776	18.8321	13.9009	13.4396	9.70854	7.24954	9.17843	23.0577	23.9429	17.4558	14.2383	19.0611	22.3423	32.554	12.8831	18.2994	12.6122	460	2.00413
461	8.31076	11.0382	12.212	11.5841	11.7245	10.0964	8.2875	9.80491	9.59924	9.05471	15.1629	9.16155	16.6759	19.3126	20.2237	11.5939	9.76717	9.15779	3.25562	3.61586	4.17011	461	17.7025	10.4417	10.653	14.1092	14.4955	16.5178	21.6046	15.3471	14.0583	18.5104	13.3193	14.0635	9.98969	7.00352	8.74487	22.9207	23.5989	17.6315	12.6045	18.0215	21.6092	30.0253	13.0907	18.9868	12.6946	461	1.57583
462	8.4289	11.2029	12.7803	11.6297	10.5115	9.9204	8.27662	10.8067	9.28815	8.6384	13.5502	9.43616	15.8778	20.051	19.3958	10.4173	11.6436	9.00849	3.90821	3.08485	3.8735	462	19.6094	10.4609	10.1277	13.6832	15.0836	17.3546	22.0821	14.597	14.1887	17.5798	14.0874	13.2262	9.80029	7.03712	8.65167	22.7001	23.7125	17.1543	12.2214	17.9463	24.2623	29.2123	12.4711	19.0829	12.3633	462	1.90298
463	8.80682	10.103	12.661	11.234	10.9641	9.86936	8.74333	11.0746	9.12353	8.39955	14.7534	9.24044	17.0936	18.8077	18.6124	11.5	11.9926	8.94306	3.53639	3.0974	4.60407	463	20.0973	10.6946	8.94317	12.1777	15.0578	17.085	19.5799	15.1766	17.531	18.2731	13.7331	12.7115	9.86408	6.15783	9.61767	23.0597	23.4861	16.8775	13.418	17.9218	24.5289	29.8609	12.4452	17.5035	12.6676	463	1.83401
464	9.86492	8.92826	11.597	12.3516	11.8633	10.059	7.93094	10.7502	9.29169	8.8537	14.8096	10.4199	16.6807	18.9789	17.9477	11.2332	12.5115	9.97734	2.79817	3.43886	3.28313	464	20.1529	9.86214	9.38497	12.938	14.595	15.9695	21.457	14.6583	16.4344	17.6977	13.434	12.4584	9.0994	6.55387	9.31296	22.0135	22.968	16.6906	12.6001	17.2973	24.0462	31.6331	12.521	17.0158	11.3543	464	1.78807
465	9.67261	8.28737	11.8886	11.6852	12.1239	11.1365	8.41376	10.7328	9.76164	8.27129	15.188	11.23	16.166	18.0594	18.9759	12.0906	11.1904	9.80237	2.93383	3.1852	3.96983	465	19.8517	11.5324	8.74536	13.2	12.668	16.5737	20.5413	14.7867	16.7913	17.5459	13.9153	12.0264	9.02852	6.28985	8.7712	22.3947	22.8091	15.3293	13.8959	18.3412	23.5192	30.7447	13.2387	18.0226	11.3399	465	1.79438
466	9.0133	7.97471	11.7983	10.0243	11.7569	10.3727	7.79641	10.0871	10.1329	8.6918	15.3621	9.97934	16.5286	18.6101	18.7217	12.4124	12.84	9.8237	2.31323	2.63886	3.56353	466	19.3678	10.934	9.88988	12.9523	14.2246	17.1693	22.8454	16.4477	15.5673	14.5554	14.5878	11.7432	9.66917	6.44706	9.68575	23.0377	23.3934	17.2396	14.6999	17.2358	22.57	30.3873	14.191	18.1127	11.2785	466	1.63409
467	9.06883	7.79833	10.9865	11.9397	10.9766	11.2567	8.43379	9.54185	10.9989	7.93278	15.995	9.37796	16.8369	18.5247	17.6199	11.4901	11.7231	9.08585	1.31767	1.59497	2.74283	467	19.5819	10.6803	8.66993	12.7323	15.4642	17.0751	23.5444	15.435	15.6504	17.2904	15.0878	13.5039	9.64397	7.10633	8.49202	23.0989	22.3772	17.5138	14.7947	16.4106	23.8142	31.7575	13.1936	19.2112	9.44878	467	1.59187
468	9.93126	8.1877	11.1721	12.2973	10.2201	12.6409	8.17257	9.7223	9.95679	8.69517	14.9577	9.57152	17.8474	18.6635	17.694	10.4918	11.2413	8.91631	1.93556	2.10368	3.26549	468	20.281	10.5659	8.74767	12.5597	15.7484	17.1413	23.2514	15.5599	14.3623	16.6974	15.0398	13.1741	9.50615	6.26264	8.79228	21.8121	21.2606	15.7693	14.4385	15.4374	24.7735	31.2522	13.6761	19.1743	9.41987	468	1.59976
469	10.9696	6.70501	10.2912	12.6305	9.6231	12.5005	6.51294	10.5258	9.44524	8.83015	14.504	9.65515	17.3602	19.0949	18.2183	11.2507	11.3373	7.76743	3.65763	1.47511	3.626	469	18.6102	10.1719	8.41517	11.9034	14.6478	16.6469	22.2266	16.5263	15.9898	15.9965	15.3028	15.0227	9.13917	6.93751	9.91752	21.7054	21.4906	18.094	13.0744	14.757	24.4932	29.3095	13.5273	18.1409	11.1211	469	1.18812
470	10.153	8.46998	10.8041	11.074	10.2564	12.1622	6.00574	10.515	8.83236	9.24057	14.6496	10.5583	16.4676	18.9938	17.6861	12.254	13.1933	6.2762	2.47728	2.28114	3.01084	470	19.2423	10.0104	7.74131	11.7683	15.669	15.7776	21.9325	16.3692	15.8585	16.2154	15.5101	14.0945	9.22777	7.78159	9.04877	22.37	21.1298	18.8408	13.3833	14.5797	25.0228	30.189	15.1982	17.5134	11.6195	470	0.568951
471	9.71808	6.80935	11.7553	11.3562	11.3531	12.5612	7.47511	10.7828	9.52401	10.1485	13.2663	9.10507	16.0426	17.9607	18.404	11.765	12.4236	7.12358	2.66882	2.32249	1.69276	471	18.6926	8.75454	8.63761	12.3372	16.1451	16.025	22.2346	16.207	15.9129	16.1199	15.7972	14.2898	9.83022	7.45076	8.78701	21.9008	21.0391	17.7146	12.6068	13.7895	24.7119	31.1053	16.258	17.4372	11.4328	471	0.929433
472	9.44228	7.36848	12.2518	9.86646	11.6216	11.6953	7.66797	10.6237	9.02884	9.81752	12.4763	10.0367	14.7282	17.5015	18.206	10.9724	12.4257	7.26638	4.11012	3.03003	3.3518	472	17.8647	8.57013	8.11653	11.9508	15.817	16.5992	22.682	15.7845	14.953	14.4243	15.3707	15.2818	9.17736	7.68558	10.6027	21.6262	20.3913	19.2985	13.6455	13.5832	23.9914	30.1622	16.0605	16.9511	10.9941	472	1.4377
473	10.604	7.79833	11.3062	10.6952	11.2883	11.9716	7.22085	10.6167	8.227	11.6043	13.6838	9.15551	15.1262	16.5999	17.417	11.2805	11.6577	7.41677	3.18351	2.9701	2.2383	473	17.5122	9.57875	8.43326	11.8059	16.8175	17.1027	21.849	15.5128	15.8484	15.1562	15.3372	16.3971	8.89071	8.52446	9.9702	23.2268	19.9009	18.2651	13.6234	13.8659	23.2868	29.4082	15.7192	17.0476	10.8023	473	1.43563
474	10.3468	8.49334	9.9956	9.98415	10.8033	10.7234	6.30788	11.1929	9.31426	12.0433	12.7036	9.93925	16.0121	17.2406	16.3395	11.8573	11.5253	6.6312	3.03208	3.37893	3.26358	474	17.8324	7.69926	7.96568	12.7698	17.0239	16.5712	23.4934	15.212	14.9293	15.7926	16.2382	14.035	8.76037	8.33124	9.46653	22.6961	20.5747	16.6101	12.6803	14.0814	23.352	30.254	15.1483	17.4952	10.8644	474	1.4546
475	11.2298	9.09841	10.4768	10.8921	11.0307	10.2931	6.64181	11.5403	7.65926	11.4159	12.736	10.0617	17.3595	17.0683	16.4353	11.5164	12.6196	7.60005	3.92488	3.35941	2.54302	475	17.5938	9.33337	7.69783	12.0883	16.9336	16.5996	22.9497	14.3964	14.3771	14.6479	16.8847	14.7438	8.32409	7.70638	9.53339	22.1182	19.6966	14.9675	13.4721	14.0661	23.6402	30.7469	15.4309	16.855	10.6312	475	1.23971
476	10.3986	8.10476	9.84899	10.6986	11.2831	10.0726	6.69754	10.2136	5.7768	12.2821	11.7208	10.4876	17.9839	16.6953	16.7935	11.1618	10.4104	7.00573	4.68339	3.02817	3.40998	476	18.0934	7.96459	7.33261	12.1495	14.766	16.011	23.0901	13.2183	14.5215	13.8975	16.8601	14.1458	8.47332	8.55206	10.0322	22.5254	20.4507	14.4854	12.7771	13.7822	23.749	31.0921	14.234	16.4793	10.3496	476	1.0885
477	10.3081	9.73852	9.48629	8.97427	11.0557	11.2074	6.86472	9.75665	8.10442	13.1173	11.122	10.9911	17.2367	18.2021	17.0214	10.3604	11.6864	7.22661	3.9366	3.0384	2.61265	477	19.7075	8.17459	8.10576	12.1932	16.0213	17.0727	22.412	13.4944	15.0411	13.7964	15.9956	16.2492	7.92206	8.22323	10.8483	22.2345	21.6692	14.0575	12.1764	14.685	23.7616	29.5257	14.2924	17.2565	9.37924	477	1.31421
478	11.0863	9.03923	9.35735	8.34771	11.5382	10.3872	6.17988	10.0158	8.49826	13.4314	10.5525	9.86553	16.2014	18.4217	16.1116	10.1856	12.8157	7.46051	5.39051	3.273	2.98222	478	18.5908	7.59577	8.50022	12.092	16.1306	16.1434	22.1319	14.0744	15.89	14.186	12.8227	15.528	8.21423	8.47766	9.69142	21.9292	22.1653	13.7341	11.554	14.2113	23.9799	29.7487	14.1691	16.9555	9.51557	478	0.95065
479	12.362	9.84326	10.5451	9.22415	12.0219	10.2865	5.08188	10.6411	7.87255	14.1467	12.221	10.088	16.6462	18.1963	16.2482	10.3623	12.1519	7.78984	4.48238	3.36174	3.1477	479	18.5608	7.75534	8.38207	13.0449	16.9353	16.8548	21.1789	15.1464	15.8612	14.4716	15.3091	16.2216	7.88859	9.18533	9.6274	22.2776	21.7688	13.2467	12.005	15.2878	26.1755	26.1583	14.2713	16.8764	8.85579	479	1.26772
480	12.0221	9.66416	9.14326	9.21006	11.3994	9.85704	5.54163	9.64838	8.79563	14.1181	11.614	10.7338	17.8076	16.9229	16.6348	10.1073	11.864	7.28156	2.80178	2.65698	2.3909	480	17.5488	8.30556	7.97491	12.7878	16.4245	16.076	20.9221	16.9123	15.0058	15.0543	16.6511	16.1091	8.43277	8.77929	10.1331	21.4268	21.4252	13.3088	12.3268	13.3001	25.0779	29.0397	13.7276	16.0873	10.3316	480	1.47286
481	12.1309	9.97214	9.30393	7.45883	9.7783	9.45445	6.81422	9.12442	7.01009	13.2136	11.9673	10.8868	17.1114	16.9584	15.759	9.71103	10.3571	7.25445	4.3296	3.49089	3.80483	481	18.4016	8.77298	8.8612	13.3249	16.3693	14.8553	19.6974	16.26	16.1459	14.2811	17.6923	15.3547	6.97192	7.52437	10.1667	20.849	22.4242	13.9665	13.1787	12.532	25.6323	26.5818	12.8652	15.5278	11.3242	481	1.68432
482	12.1626	9.98849	10.4165	7.49696	9.47526	8.60702	4.41316	8.33131	8.32789	14.0353	9.53908	8.92401	16.7971	16.6545	16.2014	10.0852	10.4002	6.20209	4.74062	3.61214	2.61789	482	17.2889	9.02852	8.36783	12.5878	16.3015	15.2445	19.8471	14.3394	16.5381	14.8668	17.5134	14.5148	6.90065	8.27324	10.0277	21.5383	20.4648	12.4551	13.324	12.343	24.7382	27.0031	13.6854	15.0925	11.0828	482	2.27157
483	11.529	7.06361	9.28706	7.7688	9.24398	8.66906	5.83246	7.64125	7.42561	13.3826	11.5485	9.22406	17.1947	16.9119	16.8964	9.86527	10.1653	6.18076	3.79373	3.17266	3.08761	483	17.6817	9.67471	8.88275	13.8929	17.3501	13.2594	20.898	14.6202	15.7152	14.4716	15.9514	14.4066	6.86088	8.33404	10.9139	20.56	20.5932	13.4569	11.3486	11.7173	25.3751	25.6408	13.872	15.021	11.052	483	1.46268
484	10.7016	8.6304	8.00936	7.94657	10.2992	9.04041	6.52774	8.63873	7.95264	13.8208	11.9643	9.73146	16.94	16.714	17.0495	9.91986	9.94697	5.77117	3.76264	4.18635	3.54779	484	16.5222	9.29912	9.4604	14.0566	17.6053	14.3399	19.939	15.1542	15.483	13.4305	15.7441	14.3398	6.06037	8.9441	9.48517	19.4398	20.2248	14.6449	13.0721	11.926	24.9796	28.28	14.1217	14.5901	10.6898	484	2.51831
485	13.0325	8.15071	10.0896	7.38217	8.73733	9.35941	5.68052	8.78439	7.65129	12.6943	11.8051	8.78779	17.4108	17.04	16.8942	9.09219	8.32346	6.12292	3.93525	2.62725	3.55733	485	18.4656	8.0105	9.86833	13.684	17.7214	14.1854	20.2873	16.392	15.2694	12.5175	15.6188	14.517	5.93673	9.19973	10.5055	20.6192	19.1166	14.3749	12.2771	10.7473	24.6215	27.9551	14.1493	15.5337	10.6082	485	2.41478
486	12.3184	7.89918	9.30835	8.79442	7.80876	9.71976	6.35403	7.64343	8.0854	11.6674	12.9867	8.74856	18.544	16.9706	18.1614	9.64881	8.84838	6.69664	4.09299	3.27951	3.12242	486	19.2873	8.46889	8.7977	13.7974	18.0894	13.4793	18.8476	16.3182	15.2908	14.0226	14.9914	15.919	6.46476	8.98091	10.6846	20.8194	19.8254	16.0175	11.9659	11.1993	23.9226	24.8185	14.215	15.2327	11.993	486	2.22085
487	12.333	6.73927	9.96628	6.59358	7.78585	9.64804	6.68317	8.34783	8.04336	12.045	13.4723	10.3966	18.2372	16.9531	18.13	10.0821	8.03769	6.56794	4.34627	3.21865	2.83964	487	19.0322	8.58782	9.69361	14.2223	15.9117	14.568	18.9101	15.7719	14.9829	14.0635	14.3856	16.0143	6.46988	8.34404	10.4184	21.6682	19.8728	17.5822	13.0669	10.9142	23.3772	25.727	12.9179	15.0444	11.4484	487	2.03551
488	12.8175	7.21468	9.82288	8.15543	6.61563	9.6432	5.39404	8.35827	7.48313	11.8717	13.2118	10.1341	16.6796	17.6628	17.6936	9.48961	8.12141	5.68513	4.60181	3.24374	3.01179	488	19.1208	8.08389	9.45155	14.923	18.2293	13.4772	19.9815	15.706	15.2788	15.2658	15.135	15.0968	6.8849	9.06491	9.91387	21.0176	19.241	18.0696	12.5713	10.9858	24.307	26.1908	13.9814	14.2549	11.9727	488	2.22865
489	12.8074	8.10632	7.74426	8.01661	7.03279	9.02677	5.21293	9.0705	7.23754	11.6573	12.5449	9.38399	16.9507	18.9244	18.3538	9.60948	8.09279	6.05424	3.49854	2.5413	1.75427	489	18.0894	8.52309	10.0242	15.7882	17.7895	13.5689	20.2211	16.5734	14.7906	15.2336	15.2395	15.1628	6.07494	8.54766	9.10388	21.0767	18.7662	17.8135	13.0053	10.5121	22.9817	24.4072	14.3305	13.8058	11.5242	489	1.76482
490	13.0191	7.82637	7.81014	9.40855	6.79027	9.67488	5.21032	10.2471	8.21196	10.9193	12.5185	9.57411	18.0036	17.6529	17.6124	9.04485	6.22448	5.74298	4.82535	1.33434	2.84107	490	17.9642	7.85959	10.4625	13.6799	17.6412	14.5355	18.6951	17.2955	14.8838	15.8597	14.6197	14.2678	6.58171	9.03411	9.77813	21.2446	18.9621	18.6551	12.5535	10.6777	26.1654	24.3165	14.9038	14.8197	13.2262	490	1.67359
491	12.1552	8.97109	8.85607	9.11972	7.53252	8.5463	5.63393	10.6045	9.60012	11.0723	12.6496	10.1104	17.1021	17.4107	18.6042	8.66155	8.77067	6.83401	4.98444	1.56709	2.3909	491	17.9258	8.54002	10.6465	15.5482	18.7538	14.6075	19.4438	16.9464	13.6645	14.4131	15.1299	14.1186	6.50453	8.31244	7.97822	20.6447	18.7418	17.7996	12.0954	10.1156	23.7591	24.8118	15.2659	14.8129	12.059	491	1.3336
492	12.5331	9.38343	9.28184	8.41567	7.25715	7.6914	5.76149	9.68882	10.2794	10.5622	10.9739	9.99227	16.2832	17.8287	20.056	8.08737	9.65908	6.81051	4.14527	-0.103507	3.02609	492	17.8537	8.45422	10.5306	14.2141	17.5384	14.0164	19.2942	17.2975	14.8497	13.8012	14.7178	14.1928	7.47554	7.98441	7.79872	20.8517	18.5856	19.6685	12.8185	10.7135	23.1669	24.1967	14.3706	15.0508	12.395	492	1.62234
493	13.3139	9.09024	9.31036	8.16786	7.81222	8.64046	4.24902	11.0068	11.3193	10.1518	12.7743	10.3376	15.6707	17.4817	20.0249	9.36859	7.54562	6.28705	4.56981	1.44166	2.14483	493	17.8006	8.06884	10.6488	15.3356	14.4797	13.2314	19.553	17.7432	15.4053	13.6825	14.3516	12.6481	7.66848	8.47046	7.22536	20.7027	18.2377	19.4079	12.3371	10.9419	22.794	24.2829	14.7254	15.8792	11.3684	493	1.89557
494	13.6139	8.3777	10.4913	8.21096	7.44218	8.30607	4.76755	11.1133	9.2731	10.2986	11.7306	9.71507	14.0592	18.1292	18.7861	8.53557	9.72832	6.60554	4.76181	1.95037	3.43525	494	17.0133	9.49369	9.80406	14.7753	13.4703	14.1718	19.7155	16.6056	16.375	13.9207	14.8695	12.6705	8.09295	8.15883	6.17264	21.1167	17.6489	19.5704	12.0429	10.9548	25.1143	25.0133	14.3743	15.4722	10.8824	494	1.49975
495	12.7396	9.00497	10.7937	8.54123	7.43785	7.31477	4.47411	10.7502	9.41692	11.0841	10.1115	10.319	14.3891	17.6186	18.3879	8.31796	9.10131	6.06508	4.61353	1.82911	3.95552	495	15.3949	8.98863	8.96241	14.2382	15.8714	13.8611	19.9715	15.7342	17.5279	13.203	14.7718	12.5666	6.89475	7.8872	6.08188	19.5429	17.3282	20.4109	11.039	10.8816	26.1586	24.806	16.3407	17.0516	11.0121	495	1.62491
496	12.0996	7.93656	9.55497	10.0463	7.92591	7.30333	4.06225	11.9799	9.08548	9.4769	10.1098	9.78965	14.5988	18.691	18.3321	8.7925	10.29	6.58096	3.70991	1.70368	4.07379	496	16.7974	9.64611	9.25258	13.9697	15.5731	13.3243	20.2299	16.4061	17.4246	13.1759	13.0849	13.0417	6.94279	7.8488	7.04626	19.0194	18.1602	20.4872	10.9166	10.6428	23.3441	25.9164	15.1787	16.0333	11.6422	496	1.44207
497	12.6192	7.80885	9.9	8.49647	7.5148	6.82374	4.19243	10.5572	10.24	9.51096	11.5034	9.79612	15.0217	17.3261	18.4624	10.2512	8.07019	6.4566	4.18132	1.71715	3.54303	497	15.8535	9.80267	8.80732	13.0486	15.8198	12.2458	20.0437	15.812	16.0294	12.8486	15.1078	14.7019	6.29545	7.41315	7.10339	18.8895	18.4841	20.6248	11.9082	10.6729	23.1175	25.1591	13.589	16.409	10.6652	497	1.50306
498	11.9994	6.25296	10.731	9.87847	8.42997	6.76918	7.17601	11.2389	9.8674	8.76623	10.4631	10.773	15.1035	17.6189	18.1869	10.3093	8.05818	5.47618	4.47923	2.00937	5.04518	498	16.4332	8.4497	7.98145	12.2634	14.8994	11.7457	20.52	15.5619	17.5632	12.1989	14.4825	14.9313	6.68172	7.908	5.9741	19.043	19.1443	19.8445	11.1591	10.1063	22.3848	23.9884	13.4398	16.347	9.8816	498	1.55187
499	11.2238	6.4161	10.3037	10.2208	6.4881	8.44027	5.55774	11.1968	8.79165	10.0063	10.1218	11.064	13.704	17.1098	17.6292	8.98529	8.89713	5.85034	3.55081	1.5002	3.56639	499	16.5972	8.56712	8.99359	11.5961	16.1717	12.2841	18.7757	15.8006	17.491	12.0131	15.0143	13.7712	7.31764	7.10713	6.18318	19.2844	20.0566	19.4914	11.3234	10.7111	22.2634	24.3761	13.5695	17.6262	9.82027	499	1.38137
500	12.2431	8.26985	9.37824	10.3053	7.54938	8.22555	7.02537	11.2359	9.81872	9.00845	9.79999	11.1459	15.0693	17.2837	17.8179	9.15518	8.71344	4.9867	4.14211	1.24422	3.96554	500	15.7609	8.55922	9.39421	12.3817	14.4245	12.469	19.191	15.7028	16.6414	12.6401	15.5377	12.8878	6.68172	6.50267	6.26584	17.6707	19.705	18.3554	11.6397	10.7775	19.9773	23.408	13.3947	15.6552	10.4312	500	1.27106
501	13.6754	8.0779	7.99972	9.47196	7.00383	8.43235	7.5587	11.7477	9.29169	8.43066	9.74253	12.0443	14.517	17.7154	18.173	9.34835	10.1776	8.47418	3.67025	1.67766	3.92977	501	16.6345	8.50164	9.6482	12.1373	15.648	12.7403	19.1288	14.8161	17.776	12.8172	16.7186	13.3336	7.49011	6.77949	5.12682	16.18	20.8384	18.273	9.71485	10.6255	19.625	22.8963	13.2387	15.7756	9.673	501	1.55912
502	13.6739	7.00481	8.93801	10.3695	6.59099	8.49482	7.06934	12.1451	7.78227	8.59635	9.41735	11.4925	14.1734	16.8837	18.0559	8.58481	8.12353	8.2674	3.47194	2.41773	4.61837	502	14.9275	8.91562	9.958	12.8261	14.3419	12.9828	19.2629	14.0225	15.5479	12.0883	15.81	13.8143	7.29953	6.64468	5.50122	16.7083	19.8366	16.9974	10.1587	10.381	19.8174	22.8681	14.5734	15.8351	9.53979	502	1.23061
503	12.3356	6.97055	10.0281	9.17774	6.6005	7.88632	6.51991	11.4498	9.74969	7.32471	9.4497	11.4796	14.9797	18.2978	18.2513	9.38882	8.33971	6.87161	3.4742	1.73759	2.93215	503	13.6802	8.28411	10.633	11.4855	13.4118	12.0609	19.1637	14.2259	15.89	12.8817	15.691	11.0262	7.35111	6.96471	5.56646	15.9646	18.8983	16.0306	9.15683	10.3231	19.5508	23.0753	13.2062	16.9181	9.11166	503	1.32936
504	13.2222	6.65322	9.67547	9.15784	6.45784	8.82438	5.35007	9.88927	10.3542	7.76794	9.49098	12.4948	15.2772	18.4828	17.4002	9.1464	9.28111	7.18721	3.43724	2.67231	3.20111	504	15.5468	9.7274	9.37843	10.6918	13.6501	13.0855	19.1718	15.4142	14.4047	12.1675	16.5198	10.4179	7.11013	7.95121	5.1487	16.5521	17.8439	14.0436	9.29861	8.86733	20.2551	22.2005	13.1945	16.8192	9.60112	504	1.15778
505	13.5256	7.18353	9.84216	9.55856	6.52355	8.06715	6.52774	11.0928	9.63021	6.43365	8.64271	10.8312	15.4854	18.8165	17.636	8.99789	8.57886	7.50895	4.56981	1.647	4.18442	505	16.6869	9.83542	8.50522	12.6417	13.3163	12.7785	19.3772	14.7918	14.979	13.4967	16.0636	10.3028	6.3742	7.57717	4.63004	17.6375	17.9487	14.5038	8.56643	9.09815	19.5624	21.0791	12.5048	16.4936	9.83512	505	1.29686
506	12.6654	7.26179	9.06052	9.5366	7.21176	8.74298	5.49374	10.3519	8.36816	6.59344	8.69719	12.1991	14.7506	18.8744	17.3006	9.10173	7.83351	6.99163	3.79734	1.05328	4.03182	506	16.4416	9.82789	7.91949	12.3025	15.3965	11.1797	20.0425	16.1155	13.4304	13.1372	17.3592	10.815	5.77726	7.80759	4.91449	17.0936	17.6685	14.6167	8.59249	10.1887	20.2162	22.3024	12.3187	15.8999	9.31322	506	1.33534
507	12.8458	6.87827	9.18102	9.84988	7.87447	7.09345	4.88074	11.2916	8.21063	6.62792	8.25922	11.0554	14.9618	17.3676	15.558	8.4489	9.9876	8.00566	3.85277	1.31251	2.85728	507	17.4965	10.2539	9.07209	11.5839	12.9543	13.2183	19.6364	16.7336	13.5138	12.161	18.5232	11.0698	6.26985	7.81199	5.80432	17.9228	17.4602	16.4164	7.19724	9.73313	22.2587	21.5519	10.9633	14.7053	8.54172	507	1.28421
508	13.0683	7.70099	7.61654	10.9285	8.04609	5.91428	5.04705	10.7985	8.6381	5.75578	8.40138	9.9358	14.4906	16.7765	15.4805	9.0479	7.74979	6.40924	4.02494	2.36988	2.43143	508	16.9533	9.67998	9.35534	11.6569	13.85	13.3498	20.1818	15.9392	14.0443	10.9806	18.2339	11.1215	7.3838	8.58567	5.4834	17.3438	17.6818	15.409	6.32289	9.34507	20.5307	20.9873	11.0493	16.0341	9.20892	508	1.36314
509	12.1213	8.30723	8.34716	11.7984	8.70102	7.42125	4.92559	11.3964	8.4903	6.14013	7.50671	9.70645	14.591	17.2933	16.2646	9.50679	7.99283	6.62614	3.66033	2.22493	2.67607	509	17.1524	10.9829	10.5487	11.4027	14.3777	13.1188	20.142	16.1438	14.3883	10.8391	18.0942	12.4088	6.86758	8.74528	5.94492	18.1994	18.4444	15.5715	7.75052	9.56262	18.6657	22.5296	10.9568	16.3784	9.17064	509	1.15028
510	11.9651	8.17095	7.46872	9.70774	8.89296	6.41763	5.34485	11.6581	8.78413	5.63593	8.13366	9.93925	14.3764	18.1685	16.2774	8.97155	9.44643	4.86668	3.4129	1.2326	2.6713	510	16.4563	10.2754	9.84678	11.2133	14.4096	12.5352	21.5653	17.4345	14.671	11.2029	17.044	10.2778	7.65509	8.76048	5.57173	17.2606	18.399	17.7811	7.66483	9.59761	18.326	21.6169	12.4452	15.2466	8.55734	510	1.02667
511	13.0981	9.39082	8.10416	11.7528	8.24668	6.67722	4.23466	11.6786	8.37569	5.77512	8.47671	8.84426	13.7107	18.3027	17.3549	8.06713	6.66745	5.26253	3.58101	0.809378	2.41093	511	16.2923	9.94757	8.63184	11.1284	14.7974	11.9249	21.3755	17.5602	14.2322	10.9049	16.7288	11.8544	7.15935	9.20653	4.84885	17.3426	19.7058	17.2701	8.07159	9.91972	17.4773	20.2175	12.1764	14.3637	9.11986	511	0.857733
512	13.4921	8.0962	9.07418	11.7839	6.93725	6.9421	5.09886	11.6125	8.97352	5.15108	9.95194	9.92717	14.6929	18.5449	17.5413	7.45783	7.05955	5.40533	3.7054	1.72319	3.00034	512	16.0153	10.2148	7.82906	11.3566	14.4003	13.9786	21.0208	17.7668	15.3277	11.3577	15.1949	11.9932	7.59012	8.35725	5.33469	17.0736	20.4961	16.1096	9.98814	8.82671	17.308	22.961	11.6181	17.8053	8.11514	512	1.10792
513	12.9151	7.43545	9.21878	11.5651	7.49016	7.26681	5.0488	13.5752	8.40401	5.27009	9.60675	8.61405	13.4485	18.7177	16.4675	8.13089	7.30259	7.05417	3.35161	1.66047	2.2054	513	16.289	10.724	8.46404	11.5214	14.4596	13.4764	20.0899	16.7222	16.7016	10.3553	15.3954	12.3545	8.46112	9.38815	5.08225	17.1623	20.3002	16.0081	10.5671	9.59399	17.2417	21.5497	10.7075	17.9646	7.46863	513	1.08883
514	10.6837	7.82364	8.50823	11.6827	7.24807	8.18815	6.11153	13.0387	8.75846	5.03376	8.97172	8.6688	12.7929	17.9301	16.2598	8.09882	7.38207	6.48769	2.46601	1.71901	3.03039	514	16.9423	9.89525	8.2697	11.4961	14.7732	13.8401	19.3134	17.0874	16.8153	10.3476	15.5033	12.5343	8.52491	7.92	4.60208	17.3142	19.8298	16.4883	10.6417	9.30686	17.0886	21.4701	12.0223	16.8268	6.70611	514	0.763728
515	11.6759	6.81675	7.74507	12.916	7.73354	8.76102	6.58565	12.1325	9.71739	4.6124	9.47396	9.4021	13.755	16.4329	16.32	8.70965	7.08428	5.75165	2.60978	0.978947	3.4734	515	15.5274	11.013	7.86639	9.72823	13.6485	13.9684	18.7946	17.6486	16.3389	10.1635	15.1643	13.7587	8.0209	9.64777	3.84638	17.8537	19.9217	16.3585	9.64298	9.3322	17.8138	20.5191	11.7049	15.581	5.81155	515	1.09121
516	11.1261	6.59131	8.12785	10.9596	8.25878	9.55696	7.3593	11.7781	8.78634	7.02237	8.46267	9.06757	14.996	17.9767	16.8444	8.40691	7.01469	4.19825	2.90408	1.11181	2.93215	516	16.9595	10.2931	8.13693	11.5778	15.1707	14.0428	19.4358	17.4259	14.6019	10.5918	13.6613	13.9117	-15.4943	9.15612	4.46634	17.0117	19.3386	17.4137	9.89849	11.811	17.0876	22.5757	11.9056	16.8153	7.58348	516	0.997616
517	10.7698	6.8736	8.68135	11.5029	9.26689	8.5089	5.68226	11.8051	9.04078	7.44372	8.25028	8.56103	13.2507	17.2261	15.6531	8.20534	6.96347	5.55969	2.76121	0.0846451	2.87063	517	15.8213	9.67547	7.56775	12.2238	17.0949	13.4275	19.3042	18.5745	14.5973	10.3729	14.7246	14.9576	8.25794	9.63737	4.52955	16.7291	19.0568	16.5214	9.15999	10.2442	19.5177	21.3089	13.1373	15.8387	7.1112	517	0.757406
518	11.5395	5.58403	8.82555	12.3785	10.0325	7.89864	6.30962	12.9887	9.73642	7.51226	8.04598	8.96755	12.968	16.6617	16.548	9.12425	5.89561	4.61037	2.94374	1.07047	3.36563	518	15.3546	10.7691	7.63163	11.4798	15.1832	13.4106	18.9523	16.8848	14.8512	10.8756	15.3877	15.3051	7.93584	9.37214	4.68069	16.1417	21.188	15.887	8.94358	10.8989	19.2969	22.0615	13.2703	15.5766	7.6202	518	0.836936
519	11.9994	5.77949	8.66207	12.8406	8.19956	8.40947	6.37972	13.3996	9.60941	7.17081	7.7923	9.10421	11.6031	15.9691	15.8327	8.97078	4.77053	4.86559	3.45076	0.699274	2.7867	519	16.1536	10.4282	6.40553	12.649	16.7934	12.483	18.5919	18.796	13.2444	9.13315	14.8147	16.1846	7.68581	9.12132	4.8375	16.013	20.5282	15.7948	9.9913	10.4944	18.4975	21.5472	13.6392	14.8625	8.29054	519	1.07846
520	11.6517	5.73549	9.30996	11.1374	9.19081	6.55094	6.07365	13.99	8.17788	8.08038	7.38072	8.99644	12.2804	16.1839	15.2518	8.50006	5.79988	3.48499	3.86044	0.63888	3.09381	520	16.1789	9.91746	6.7161	12.3695	16.2261	13.4731	18.0711	19.665	12.4662	9.53394	15.0364	16.7795	8.1402	8.57967	5.06685	15.6014	20.413	14.8814	9.5245	10.2072	18.4291	21.4139	12.9407	14.664	6.21664	520	1.31779
521	12.491	5.57508	9.61482	12.3205	10.3053	8.70734	5.07535	12.9147	9.63729	7.47904	7.62248	9.90002	12.8583	16.9271	15.5584	8.7715	5.27284	3.13432	4.0673	1.35943	3.57545	521	16.6221	10.31	5.89446	11.1007	17.5117	12.9626	17.9351	19.5126	13.3166	10.7247	13.5806	16.8623	7.44562	8.73128	4.17176	16.7439	20.5964	14.3809	10.4952	9.27188	18.9629	21.3457	13.3477	15.4682	7.812	521	1.42188
522	13.6382	6.8954	10.1804	12.8551	9.08533	10.0273	5.90604	13.0052	9.12973	6.72506	6.94233	9.42667	13.8271	16.3753	15.1093	8.78486	5.53425	3.52367	3.46338	1.1736	3.97078	522	15.0563	10.0639	6.5714	11.9834	17.7173	12.2372	18.5566	20.823	10.749	11.4781	15.1541	15.2387	8.08075	8.23523	4.27873	16.0705	19.5581	12.9759	10.2164	10.054	18.1956	22.8638	14.1477	15.6771	8.22296	522	1.05668
523	12.4981	6.81169	9.39511	11.1809	9.17308	9.27317	5.11846	12.7312	9.64128	7.11362	6.38773	9.12749	13.7386	16.066	15.7762	7.53266	4.49712	3.95929	4.17727	1.47511	3.77526	523	14.6548	9.12261	6.05879	11.3431	18.1221	13.8718	19.0253	21.7717	14.5499	10.606	15.5746	14.3501	4.92674	8.68088	5.15599	16.1369	19.3903	12.5514	10.5047	9.14561	19.299	22.391	14.5223	14.8006	8.52218	523	1.17471
524	11.3837	7.36809	9.57264	10.3065	9.01789	10.2117	6.43196	11.6864	10.244	7.23094	7.30326	9.05377	13.942	16.6388	15.2459	7.67544	4.38055	4.43973	4.07722	1.09648	3.63697	524	14.7086	8.52083	5.67895	11.9157	17.9991	13.2569	18.4423	20.7331	14.5297	12.0488	15.3631	14.7433	6.38641	7.59357	4.54535	16.7399	18.1096	14.344	9.20975	9.64988	17.5587	22.877	13.6648	14.0969	7.77021	524	1.77594
525	12.0918	7.25907	10.9315	10.1942	9.13418	8.89346	6.77503	11.3424	9.46737	7.32976	7.3488	8.23426	13.5318	16.5744	15.0467	6.94359	5.95072	3.96869	3.99158	0.48139	2.91784	525	15.3791	8.84374	7.23063	11.3713	18.7873	12.5964	19.3295	21.8919	14.1794	11.8045	14.7875	14.0165	6.5884	8.04162	4.14501	15.5094	17.7817	14.1654	8.67819	8.87658	19.3621	21.7109	15.5067	13.9309	6.9776	525	2.07342
526	12.7966	7.72085	11.2745	9.51878	9.00838	8.08739	5.99311	12.4647	9.60809	7.10352	8.91937	8.78951	14.231	16.1842	14.7028	6.94664	6.05493	3.50126	3.88027	0.759204	2.65032	526	15.4589	8.78089	7.27296	10.8897	18.0233	12.5607	19.8359	21.7493	13.7946	12.0359	14.4621	14.4476	7.07076	7.70278	5.70707	15.9027	17.4498	13.6814	8.67029	10.3472	19.3657	24.181	14.3102	13.2228	6.72642	526	1.85081
527	12.4474	7.48529	10.3836	10.2742	8.70534	8.23039	5.26866	10.6772	9.12398	5.90674	8.43926	7.84023	14.8123	15.4295	14.1994	6.76416	4.72991	3.78757	3.75002	1.58893	2.98318	527	14.265	9.15498	6.70378	11.175	17.2658	13.4599	19.5317	21.0158	13.6882	12.8663	13.5857	15.0688	6.92389	8.52486	6.51423	17.3074	17.2535	14.7306	9.70222	9.37161	20.9208	26.1551	15.1025	12.5091	7.88115	527	1.36498
528	12.5238	8.06972	10.6053	10.1607	8.63877	9.50724	5.83681	11.689	9.57844	6.49798	7.36583	7.15091	14.8978	14.2667	14.6777	6.94931	4.152	5.40858	4.40937	1.12343	2.84584	528	15.0113	10.5636	6.07033	12.2005	16.9078	13.4493	20.1448	18.6464	13.3011	12.9144	13.1847	14.1704	7.95356	8.66007	6.74033	17.0316	16.3445	14.1458	10.5671	11.0658	22.3823	24.7803	14.6958	12.4575	5.43615	528	1.20079
529	11.7128	7.30735	9.61161	9.43756	8.54323	9.70524	5.81635	12.5317	7.87741	5.67041	6.98531	7.85618	14.9655	14.3094	15.1261	6.59694	4.38267	4.86451	3.52648	1.99404	3.20731	529	15.3374	11.3438	6.13691	11.9724	15.3453	13.9523	19.4426	19.3532	12.6429	12.8456	13.5521	14.3954	7.57437	8.15083	7.84005	16.9925	16.9477	13.6886	9.71643	10.0786	19.9532	24.8128	14.0001	12.1946	7.52723	529	1.27063
530	8.96932	6.65789	9.61643	9.56436	8.56528	9.40737	6.4533	11.5603	8.48808	5.97865	6.30729	7.22075	16.2475	13.867	14.3693	5.90174	5.73842	3.39172	2.6553	2.12969	3.42905	530	13.0536	11.3265	6.62027	11.5598	13.4126	12.7608	18.6614	19.2362	10.836	11.7284	12.2471	15.6254	7.00657	8.31844	8.27645	16.5673	16.387	12.2972	10.2788	10.8237	22.3754	23.7643	13.2739	12.3574	6.65689	530	1.37082
531	11.6636	7.22403	9.08261	12.5393	8.88258	10.1175	6.34228	13.7874	8.40091	6.24231	6.26302	7.66391	15.4523	14.372	14.9214	5.54822	6.87163	3.39823	3.65492	1.38963	3.00893	531	13.0188	11.3032	7.13981	12.9065	15.2034	13.0243	19.6561	18.1669	11.8487	12.3141	12.9272	15.5875	7.52634	9.89099	7.51548	16.469	16.3437	15.1698	10.0995	10.0428	22.1787	22.3113	15.0404	12.0901	5.96937	531	0.967831
532	10.8198	7.83338	8.53434	11.8439	8.0984	8.56654	5.92215	14.6549	7.66501	6.55896	6.75122	7.72298	15.5245	14.9886	15.2605	4.8095	7.05744	3.38521	3.63825	0.56269	3.00654	532	13.6465	11.5388	6.69031	13.1767	15.2409	14.7332	19.3877	16.617	11.6488	13.8566	13.4289	15.7685	7.35663	9.17332	6.81975	16.3299	16.2903	14.3301	10.3831	12.2223	22.1215	21.3603	16.5126	12.1966	7.70419	532	1.20728
533	11.2126	8.34889	8.82474	11.9227	8.03139	9.31057	4.94082	15.3536	9.10893	6.42944	7.0781	7.70314	15.658	15.0485	14.6725	5.82348	6.42442	2.95393	3.35567	-0.0129151	3.0795	533	14.089	12.0107	6.43401	13.2114	14.6829	15.2322	19.6011	15.7967	10.3805	13.6924	12.7471	16.7795	8.41623	8.57967	7.04342	15.6633	15.9142	15.4932	11.4501	10.9592	22.8408	22.5825	16.0009	11.4901	7.13816	533	0.867891
534	11.0907	9.54852	8.86451	12.1539	8.40965	8.75926	4.49544	13.2565	8.56287	6.97106	7.78337	6.34519	15.6617	14.5638	14.7069	6.53815	6.82889	3.07865	4.11417	0.739692	3.67703	534	13.006	10.5659	6.58525	13.5134	14.0734	13.9022	20.1689	15.6895	10.4314	13.3814	13.782	15.0977	6.80812	7.20033	7.72619	14.7725	16.9794	14.7227	11.0813	10.5885	21.4856	21.4901	16.901	12.6207	8.03193	534	1.05915
535	10.8399	10.057	9.90281	12.0839	7.1815	10.6429	4.7423	13.0887	8.47923	6.14938	7.00574	5.78907	15.9447	16.0752	14.2005	5.25807	5.3117	2.58628	4.59505	0.338766	3.492	535	12.7212	9.71273	6.85502	13.0653	13.3816	13.5187	21.2876	15.9667	11.9388	13.8652	12.5432	15.2391	6.942	7.14713	6.75168	15.9866	18.2593	14.5941	12.9579	11.7136	21.5224	21.3725	16.7538	11.6632	8.38585	535	1.53592
536	11.2555	9.94839	10.0888	12.7216	8.43862	10.0858	4.66785	14.3336	9.09079	6.52237	7.03256	5.6813	15.7551	15.7838	13.285	5.14431	5.29757	3.93868	4.45895	0.847937	1.9331	536	12.9738	10.4756	7.18137	13.0273	13.2183	14.0641	21.3013	15.5536	11.4701	13.4464	13.4948	14.9166	7.737	7.67838	6.95833	15.8691	18.0153	15.2285	12.5681	11.4064	20.2897	23.3308	15.5651	12.3844	7.69833	536	1.02915
537	9.93909	8.91502	10.1053	12.0627	8.65044	10.3775	3.89159	13.7596	10.0466	7.73093	6.48052	4.7359	15.9254	16.2567	14.3457	6.38735	5.32618	4.33996	3.75948	0.703455	2.12671	537	12.3571	10.3653	7.61162	11.6312	12.0718	14.0115	22.2768	14.8582	12.6289	14.0962	12.231	14.5054	7.90552	6.8823	7.16053	16.0473	18.2176	15.8573	13.1076	11.3175	19.441	23.8362	17.3012	12.1723	7.50457	537	1.194
538	11.3908	7.78626	9.4168	10.3753	8.79656	10.3824	3.9434	12.5873	9.6342	7.83564	6.69248	5.63431	15.2247	16.4657	15.287	4.96564	6.95747	4.02798	3.9366	1.72319	2.77431	538	12.1309	8.83922	7.90025	12.1238	9.92991	14.589	21.792	15.7083	13.6032	13.5212	14.1311	13.021	7.65431	7.17833	7.41337	16.9897	18.2754	14.9401	12.9579	11.6976	20.6153	24.6595	17.8915	13.5238	9.31635	538	0.641811
539	11.3136	7.30384	8.70384	11.5207	9.0542	9.18033	4.3152	12.3208	9.69969	8.05515	6.27324	6.41158	14.8101	16.3135	13.8038	5.98725	6.48801	4.95995	3.76354	0.438184	2.64841	539	11.7048	10.3017	8.48136	12.021	11.1091	14.0834	22.4232	15.018	13.9325	13.7625	13.1346	13.1215	8.13981	7.55237	6.7926	16.407	17.9944	15.5906	12.798	13.1565	21.646	20.4348	17.0823	13.9424	9.78121	539	1.10018
540	11.3259	6.57885	8.63958	11.3595	8.10575	8.29947	4.57642	11.4972	10.1289	6.77931	6.50733	7.28757	15.2084	16.7982	13.2798	4.69458	6.77978	3.62778	3.79959	-0.280973	1.84011	540	12.1053	10.4018	8.39862	11.4031	11.2663	14.2589	20.7788	16.9755	12.6537	13.9521	12.8104	12.6248	7.70786	7.54997	6.53206	16.1836	17.8283	14.9596	12.8963	12.838	21.9341	18.7187	15.739	11.9873	7.19441	540	0.921326
541	10.8127	6.41805	9.12037	11.8095	7.09245	7.71076	4.40967	10.4306	7.88848	8.15649	5.31813	6.53056	14.8949	16.476	13.2282	5.67497	6.70242	4.4419	4.58153	0.508335	2.29028	541	11.2426	10.9821	7.68089	12.5176	11.7791	14.3214	21.0485	15.3738	13.1116	12.5554	12.2378	11.9799	7.11092	8.06842	7.1897	15.9303	17.1183	14.259	11.4213	12.5457	20.4129	23.7879	16.5706	12.971	9.33432	541	0.891306
542	11.8831	6.78599	8.65966	10.3397	7.42532	7.96772	3.5028	10.6985	9.65234	8.33605	4.71842	5.16355	13.5099	14.6378	13.464	6.21288	5.76491	3.99146	3.53414	-0.0328917	1.78909	542	11.7367	10.526	7.24679	12.7543	11.7948	13.0436	20.8278	15.2995	12.606	12.2234	11.9842	12.9887	7.00224	9.73378	6.23059	16.4502	17.4225	14.0462	10.6358	13.582	18.2151	24.4019	16.1951	13.2136	8.38038	542	0.922888
543	10.5682	6.09916	10.6423	10.1831	7.16032	7.753	4.23466	10.2619	10.1519	8.18845	6.19237	5.40669	14.5282	16.8989	14.3135	5.51233	8.11328	3.89494	3.87441	-0.584339	1.68227	543	10.8059	10.8896	7.43382	12.2891	11.6437	15.9802	22.0842	15.6961	12.5827	14.3847	13.5797	12.9003	7.75078	9.15532	6.49316	16.9285	16.9445	16.0299	10.3973	13.582	20.9838	22.4042	15.6413	12.1283	10.4695	543	1.3261
544	10.2648	5.85386	10.0852	9.11309	4.54018	7.13921	3.85937	8.44958	10.0497	8.83772	5.81612	5.81106	14.4125	15.8559	14.0209	4.98473	7.85577	4.08473	4.42289	0.250962	1.41331	544	11.6305	10.701	6.91313	12.585	11.1809	15.3091	22.6154	15.7342	12.5003	14.4509	12.971	11.5358	7.51295	7.01872	6.02475	16.5233	16.1041	14.7682	11.1093	12.8541	21.1953	23.2962	14.4951	13.5977	8.75305	544	0.948619
545	9.76094	6.01194	10.5382	9.75664	6.52787	5.82408	4.98654	10.9998	9.53729	8.74058	5.41092	5.94987	14.6859	15.8406	14.1354	4.75452	7.32519	5.60271	4.86096	-0.280044	0.684647	545	10.859	11.4368	7.65126	12.5262	12.4298	16.0916	22.3049	17.722	12.2553	15.2439	12.8699	12.4481	5.9639	6.94551	5.66412	16.877	16.7555	14.4441	13.0551	12.7914	21.6686	20.2221	15.7759	12.0512	9.3851	545	0.819479
546	9.88766	5.62258	9.74898	8.95976	5.68101	6.03967	3.0683	10.0188	10.4701	7.5745	6.49627	5.60844	14.5999	13.7747	15.5602	4.81446	7.27609	5.90421	4.69781	-0.186201	0.0737723	546	10.4557	11.4323	7.3176	12.2103	10.787	16.4052	22.4313	18.6381	11.3614	15.7363	12.1227	13.0348	6.20488	7.11993	5.66087	16.2212	16.3938	15.8396	11.7665	12.1693	19.6171	24.0005	17.0636	13.2172	10.8594	546	1.01934
547	10.3055	4.88085	9.25975	8.19894	5.8777	6.43963	3.13317	10.5911	9.34302	7.77635	5.66034	5.89426	14.5709	14.4963	14.7773	4.81179	8.47465	6.00796	3.33629	0.464201	0.256892	547	11.6617	11.4443	7.37302	13.5032	11.9823	15.8783	21.8811	18.7335	11.4705	16.3633	11.2718	13.0482	5.14252	7.75879	5.66857	17.2834	16.6399	14.772	11.0584	12.1262	20.915	21.0512	16.7806	12.9817	8.68274	547	0.694446
548	11.8067	5.9329	9.11394	6.81901	5.79254	5.69472	4.73272	10.3137	9.15761	8.25867	6.88401	4.77212	14.7599	14.068	15.0479	3.52751	8.86675	5.12082	3.52738	-0.252634	0.345113	548	11.68	11.7141	7.78518	12.9988	10.9301	15.9399	20.7588	17.3065	12.1155	15.3024	12.1167	13.2051	5.60007	6.56067	5.78811	15.6469	15.1509	14.7404	12.1013	13.7593	22.0246	21.4107	17.8343	12.5826	9.41284	548	0.882809
549	11.9964	6.50604	11.2038	6.52355	5.1415	5.82232	4.95432	12.2669	10.1661	8.27045	7.16238	4.56088	14.9358	15.4112	14.9592	4.29754	8.00908	4.80233	3.50214	0.658856	-0.61674	549	10.8473	10.7477	8.81233	12.8535	11.9238	15.6432	20.7239	17.6419	11.0026	15.5492	12.8079	11.8005	5.40634	7.43916	6.47695	14.898	16.0688	15.0927	12.1164	13.5759	21.4525	20.4115	17.2793	11.7419	8.45265	549	1.18327
550	11.8175	5.82038	12.2136	7.0722	6.92212	5.25649	3.97344	12.0651	8.66819	7.59637	7.07087	5.15191	15.3988	14.0139	14.3671	5.01832	5.47525	5.34423	2.22805	0.665825	-0.602434	550	11.8165	11.5779	8.85774	11.1505	12.2709	15.9679	19.9201	16.5235	12.4192	15.1287	12.6592	12.7136	5.90326	7.26674	5.89143	14.1163	16.2116	15.459	12.2254	14.1345	21.4046	19.4345	17.6543	13.245	9.49604	550	0.93544
551	11.6688	6.16924	11.579	7.1066	5.37883	4.59518	3.42182	11.4624	9.42798	6.31548	7.14322	5.78562	14.3727	15.0863	13.0481	4.76406	4.55611	4.32911	3.61481	0.790795	0.816741	551	11.8648	11.9396	8.11807	13.0429	11.7315	15.485	20.197	19.0972	12.0231	15.326	12.29	13.0473	5.617	6.24504	6.3015	13.6124	16.316	16.3612	13.2403	15.4917	20.6874	19.7919	17.765	13.158	9.91246	551	0.710137
552	10.0766	6.78327	10.5985	5.92268	6.51923	5.96971	2.88632	12.603	9.1169	6.71413	8.12131	5.48299	14.5665	13.883	13.2809	5.12293	7.46402	3.88626	3.42958	0.777322	0.346067	552	12.2663	10.9709	7.90372	12.4021	11.0873	15.2704	20.2821	18.924	13.2731	15.6993	13.9353	12.2704	4.89327	5.41896	6.46155	13.3318	15.9692	14.7761	12.9986	15.9948	20.1056	20.0899	18.063	11.9658	10.0804	552	1.34867
553	11.0259	6.69878	10.5985	5.74034	7.29519	4.88206	2.8898	12.1095	8.36462	6.31044	8.1145	5.37005	15.4639	12.681	13.7465	6.5748	7.01045	3.45932	2.29025	1.18615	0.900671	553	11.4505	11.1959	8.21736	12.6147	9.95975	13.8455	20.0686	18.9354	12.3765	14.9433	13.0377	13.1456	4.18805	5.35656	5.03038	13.584	14.6989	15.4004	12.5409	13.4267	18.8783	21.078	17.4265	13.7843	9.75855	553	1.55404
554	10.7516	6.75679	9.82489	4.87592	8.10575	5.16849	3.95689	11.4729	7.44862	6.33567	7.53991	4.13409	14.8365	12.8819	12.9725	5.85822	6.07118	3.13758	2.37272	0.525059	2.09381	554	11.1621	11.1982	8.14847	10.8946	9.78922	14.231	20.4667	19.2146	11.8188	14.2415	13.7535	13.1689	4.79602	5.8086	4.83102	12.9981	13.9677	15.987	12.4844	14.5149	19.7097	20.875	17.7889	12.5329	9.58706	554	1.50886
555	11.7486	6.24361	9.48106	6.66693	6.49502	5.4448	4.37441	13.3352	8.69828	8.19181	7.35391	3.88319	15.6662	12.716	13.1043	7.17265	7.01681	2.30936	4.07136	0.141323	1.3723	555	12.2205	10.8512	8.2239	11.5647	9.28489	13.4965	19.7115	17.5696	11.8087	14.6272	12.8338	12.3886	3.74547	6.16943	4.7516	13.357	14.017	15.9159	13.3552	14.1393	22.1687	24.4823	18.3213	12.687	9.07103	555	1.33059
556	11.9535	6.34407	10.053	5.9579	7.83383	5.40037	4.78453	13.8122	8.7381	7.61865	7.98171	4.30136	16.0559	12.7443	13.653	6.08384	8.45416	3.89928	3.87125	0.798693	0.633622	556	12.4138	10.8817	7.84407	11.5561	10.4508	13.1057	20.3242	19.5189	12.6603	15.8296	12.2369	13.4802	4.94407	5.11693	4.77551	12.1553	14.302	17.1298	12.3727	12.7833	21.79	21.0387	17.4115	14.2474	7.58583	556	0.869775
557	11.0933	6.7603	9.90803	6.36898	7.66351	5.62872	5.34485	12.7921	9.23416	7.77887	8.10855	4.65658	15.5264	13.708	13.9404	6.79661	8.16415	3.90651	3.05236	0.483713	2.09476	557	11.9387	11.4353	7.51734	10.7905	10.8289	13.1127	21.1119	18.2882	10.6741	15.2542	11.9498	12.6317	5.21734	6.40026	5.65237	11.7009	14.1663	17.1817	11.8593	13.3351	21.5166	24.0188	16.8078	13.6048	8.48546	557	1.34919
558	11.2924	6.11824	10.9825	6.25253	7.98254	6.33579	6.15899	13.2996	8.14646	7.95969	7.8587	4.81479	14.2693	13.851	13.4389	7.17685	8.534	3.85084	2.6873	0.821921	2.15103	558	12.6608	11.5433	6.71186	11.3202	11.3534	11.9951	21.6075	18.9114	11.7198	16.0575	12.1375	13.744	3.98251	6.46946	4.87924	11.8928	13.6032	16.1306	12.2001	12.1029	23.5487	22.6812	17.613	13.1465	9.21439	558	1.29796
559	11.5715	5.04399	9.76544	7.30882	6.17382	6.36967	6.08454	12.6517	7.78803	8.04926	8.08939	4.82342	14.5747	13.2717	13.6784	6.78019	6.63284	3.7554	1.67822	0.148291	3.50821	559	11.9728	12.8364	6.25506	10.726	10.2157	13.0613	21.1111	17.0823	11.8643	16.2106	12.7722	15.5599	4.89918	6.27504	5.3513	12.7532	13.4893	16.7925	11.9303	11.8817	24.8171	19.3888	17.1913	13.1747	8.45187	559	0.924357
560	10.8563	5.52135	10.4921	6.70464	7.12401	6.6253	5.93172	11.7764	6.98752	7.85078	8.29157	4.41948	14.1708	14.2991	12.7072	6.17432	8.79328	3.06889	1.44386	0.956647	4.38518	560	13.2172	12.0999	7.30028	10.0229	12.0484	11.8324	20.2271	15.7892	11.7035	15.5957	11.8274	14.767	4.62158	5.94301	5.42383	13.375	13.3901	16.184	10.026	14.0846	22.7209	21.108	16.7506	12.4019	8.31905	560	0.626158
561	10.9182	4.8314	9.55497	6.3035	6.14702	6.92054	6.61786	11.5124	7.61323	6.7259	7.21771	4.49233	13.5088	14.4684	12.5852	6.47287	8.98721	3.1965	1.19824	1.18707	4.64413	561	12.689	11.9893	7.40227	10.6216	12.433	12.4341	19.6665	15.8732	10.5964	15.8872	10.6325	15.2525	4.95588	6.33305	5.85294	13.1988	14.0516	16.1938	9.85426	11.6187	23.9169	18.1541	16.3557	10.8765	7.58192	561	0.949677
562	11.3971	5.02218	9.37141	6.94664	6.34026	7.00017	5.31698	12.0221	6.77378	7.62202	7.68973	4.53846	12.8323	15.3422	13.4101	6.23426	7.86601	3.22542	1.24376	-0.92487	5.16773	562	12.2758	11.6174	7.03898	9.85923	10.5673	11.1957	18.9238	15.5242	12.0064	16.1698	11.8257	14.5118	5.53943	5.71939	5.64548	13.6679	13.5045	15.6993	7.91955	13.5192	24.2602	18.9506	16.6363	12.8836	7.81083	562	1.05798
563	9.42886	5.64945	10.2406	6.65367	6.15696	6.35031	6.03882	9.97841	7.95131	7.43279	6.69078	4.52898	12.3317	14.1534	12.5683	6.42476	7.29446	2.3813	1.25863	1.06071	5.33798	563	12.9829	12.3464	8.39362	9.75108	10.4669	11.416	19.3263	16.3017	11.7765	15.5333	12.2841	14.3971	5.10197	5.26815	5.99881	14.1902	14.1242	15.6749	8.67622	12.2988	24.1435	18.6873	16.4194	12.2875	8.94134	563	1.1151
564	9.44041	5.28539	11.0801	6.99347	6.79027	7.65708	5.89951	11.6738	7.88627	6.58251	7.3688	4.58976	13.2168	15.4131	12.7371	6.49539	6.44102	1.44788	1.18156	0.0316838	5.82916	564	13.0488	11.7326	8.72574	10.2163	12.0911	12.7308	18.923	16.3134	11.6286	17.0264	10.327	13.4806	5.40831	4.93652	5.98382	14.012	15.0008	17.4254	10.1299	12.6804	21.9936	17.8853	14.0799	12.6962	8.55968	564	1.0951
565	9.66404	4.62698	9.24288	7.59227	7.3475	7.23205	5.55469	9.12616	7.26276	7.13632	6.49159	4.54019	12.6125	14.7373	12.6091	6.35719	7.32696	2.6152	1.31001	0.287663	4.41046	565	12.7926	12.1206	8.6834	9.60008	10.2859	13.423	17.4632	16.3641	11.7785	17.5553	11.7153	11.672	5.00234	4.71289	5.74516	13.5217	14.8234	15.8001	9.12958	11.0393	22.1614	18.2066	15.919	13.2808	7.81669	565	0.908242
566	9.75088	4.80959	8.80105	6.38348	6.37008	7.27825	5.53249	11.0181	6.89592	8.82847	5.18746	5.84555	13.6018	15.354	12.8457	6.44118	8.07443	1.44246	1.6656	0.894859	3.69038	566	11.6478	11.5365	8.43518	10.3363	11.948	13.0436	18.3379	16.6511	11.733	16.614	9.44554	11.4436	5.00904	5.70539	5.58186	12.1925	15.3596	14.7945	8.35159	11.0923	22.5001	19.15	14.5162	13.5206	8.45851	566	1.28143
567	6.86132	3.93937	9.34289	6.05362	6.92558	5.56536	6.36753	12.3112	6.5689	10.172	5.35942	5.411	13.3358	15.6854	13.3577	6.27015	9.44042	1.96484	1.53355	-0.575047	4.34322	567	11.1859	12.5342	8.51023	11.6598	9.88476	13.7707	18.3933	17.1864	11.0457	17.4796	10.6872	13.3616	4.44478	6.11823	4.02548	11.7669	15.0445	14.9517	8.93173	11.8886	21.6813	17.7731	15.1163	14.0552	9.25697	567	1.08467
568	9.84219	4.77844	9.31317	7.39792	7.76553	6.25263	6.05667	12.2486	7.07956	10.1888	6.0749	5.40238	13.5571	14.7503	12.9044	6.66833	8.197	1.08203	1.54211	-0.0263877	3.51537	568	13.3123	12.095	8.20004	10.7877	12.4439	13.7152	16.7774	18.1033	12.8805	17.3283	9.95191	13.0076	4.80783	5.23694	3.67093	10.5947	15.4382	14.2696	8.82273	13.4348	19.6067	19.1847	14.1043	12.8391	8.61594	568	0.946273
569	10.1556	5.07942	9.8273	6.67024	6.52095	5.81748	5.07927	12.1564	6.29852	10.3688	5.3624	6.2012	14.1235	14.7171	13.2196	5.83149	7.98258	0.849222	1.73726	-0.846358	3.43239	569	10.4191	11.6705	9.54814	10.1343	12.2197	14.007	17.9969	17.3179	12.9127	16.7417	11.1783	11.7152	5.38035	5.09573	4.0664	9.70955	15.5514	14.3677	9.6564	12.6325	19.9957	19.476	13.8545	13.2518	7.71825	569	0.567702
570	9.79523	6.0318	9.4409	4.65588	9.03561	6.05815	4.53506	12.169	6.77423	10.2935	5.51647	6.52884	13.5471	14.1866	13.3468	5.44209	8.68307	1.69371	0.966134	0.29649	3.78862	570	12.0452	10.7974	8.70572	10.4767	12.7954	14.208	17.6201	16.4277	12.6316	17.9363	11.9672	12.5968	3.90967	4.21765	4.41002	9.36706	15.0068	15.9043	11.1287	13.6443	18.4734	19.486	14.4834	14.4738	8.80344	570	1.0255
571	9.62639	6.10734	8.96894	5.93677	7.70242	5.41313	4.34045	12.0021	7.00345	10.0311	6.30005	5.9516	11.8382	14.3273	13.9243	4.68886	6.86562	1.46415	1.27891	0.545036	3.43334	571	11.6404	10.392	9.24604	9.51438	12.7753	14.8886	18.4262	17.8704	11.4961	16.5633	11.6758	13.0133	6.16905	1.96863	4.58466	8.27406	14.0997	14.834	10.7914	13.693	17.2943	20.1167	14.2677	13.8614	9.14994	571	0.734545
572	10.4728	5.98585	9.5377	5.20495	8.40057	4.73334	4.05224	10.8741	7.488	10.4399	6.37284	6.49564	13.5653	13.8724	14.6321	6.16783	7.25984	3.04539	0.993175	1.20148	2.97698	572	12.6407	10.0639	9.09134	9.49724	11.8158	13.8578	17.1843	16.2243	12.6518	17.7901	11.6783	11.5854	5.01534	5.58618	4.0113	9.8718	14.5392	14.4335	9.77409	13.2341	16.4791	20.4169	14.8856	12.9078	9.24057	572	0.733971
573	10.9953	6.4196	9.0545	4.58046	9.48218	6.29971	5.0218	11.1024	7.11452	10.9176	6.50265	5.95849	13.183	13.774	14.9816	6.18119	6.12028	2.43046	1.1721	-0.104436	1.94264	573	12.6748	9.20917	9.17485	8.33455	14.1846	12.7333	18.8287	16.7352	11.3529	17.3838	11.6894	11.7634	5.37799	5.7926	4.93313	10.273	13.5282	13.2915	9.91705	13.2932	16.5775	20.4115	14.7315	13.7526	10.2258	573	0.337371
574	11.5454	6.03297	8.27366	4.51498	8.58949	7.93956	4.78453	11.2429	7.23887	10.5349	6.16939	5.96798	12.5463	14.383	15.0554	6.67978	5.93447	3.80782	1.8968	0.674187	2.46338	574	12.2546	9.39471	9.27991	8.47004	12.7644	13.4834	18.8066	15.823	10.0768	18.2163	11.6486	12.652	5.17914	6.44426	4.47444	8.45909	13.3203	14.0864	9.7891	12.9317	15.929	19.5264	14.7668	13.8312	9.34018	574	0.761858
575	12.4112	5.82699	9.57867	4.38362	8.1961	8.02051	3.64038	12.4147	6.81184	11.1787	5.46114	5.70329	12.4604	13.703	14.9446	6.25678	7.02282	4.11148	1.58312	0.0525896	2.77621	575	10.2672	7.93749	9.18485	7.74892	12.458	13.9392	17.8428	15.2524	11.1855	17.0771	12.3062	12.6865	5.49927	7.50436	4.76457	8.6673	13.1654	13.534	8.50877	14.3179	17.053	19.5635	11.7235	14.0627	9.27885	575	0.890753
576	12.4872	6.37171	8.46043	4.07282	8.21555	8.16043	3.65257	11.4981	7.09151	10.5105	5.4854	5.52136	13.437	13.7149	15.0479	6.27473	6.34706	3.47125	1.39338	0.128779	1.88732	576	12.1521	7.7162	9.33148	8.58758	12.0331	14.0243	18.4688	15.9439	10.4489	16.4652	12.618	11.6462	4.71293	7.42276	5.0478	8.95025	13.3488	13.0038	8.38476	14.9098	16.8898	19.7504	13.951	13.4622	9.28315	576	1.04287
577	11.8674	7.13759	7.93425	3.86397	8.43602	8.73726	3.25072	11.4577	6.36446	9.77505	6.20769	5.73519	14.4568	13.851	14.7436	5.6429	5.11176	2.93477	1.17796	-0.0319626	1.98651	577	12.4401	7.85018	9.87179	9.12342	12.3326	14.3518	18.1955	14.6764	10.0431	15.2099	11.6414	13.3284	4.87083	6.8243	4.40515	8.46309	13.7542	12.6236	8.16637	16.2682	18.6211	19.6664	13.7159	14.488	8.62648	577	1.06361
578	11.2275	7.05426	8.70384	4.56595	9.04556	7.93956	3.42922	10.1963	7.4557	9.27842	6.46435	5.09975	14.6829	13.7351	14.6706	6.35604	8.40506	3.27784	1.22077	0.528776	2.6465	578	12.1613	9.46546	9.80868	8.619	9.64893	13.9955	18.9591	15.4378	9.38642	15.6081	13.3244	12.9775	4.28649	7.72078	4.98257	8.17136	14.3738	13.3858	7.91797	15.2343	19.8401	21.9125	14.249	13.687	9.4226	578	0.955007
579	9.25406	7.72241	9.51882	3.97047	8.23414	6.5879	4.39444	9.8997	6.59899	8.72797	6.28431	4.87213	13.0591	13.7099	14.7155	6.3213	7.21463	2.95176	1.21401	0.809378	1.80339	579	12.4511	8.79293	10.4264	8.90875	11.3844	14.9133	18.6361	15.5418	8.95733	15.5204	12.3644	12.486	4.23924	6.8607	4.95461	7.63984	14.428	14.3215	8.0242	15.953	19.7785	23.2301	13.1251	13.8502	9.06126	579	0.667834
580	9.08449	7.47906	10.2599	3.98622	9.14844	6.86026	4.47237	11.0172	7.08045	9.19852	5.50924	4.89843	12.6021	13.5707	14.6953	5.65359	7.02882	3.53235	0.71375	0.264899	1.67416	580	10.8466	8.43051	9.32147	8.7904	11.5441	14.4566	18.0342	15.4134	8.66454	14.0888	12.8019	12.2161	5.36697	6.49227	5.88536	6.55564	15.1641	15.5004	7.08746	14.9854	20.1776	22.233	12.9646	14.1823	9.67222	580	0.58847
581	10.0188	7.60404	10.4583	5.19583	7.73786	6.37231	3.53807	10.9911	6.24719	9.07699	5.37346	4.01942	12.6999	13.4693	14.0691	5.71162	6.79003	4.01062	0.459113	0.637486	1.17201	581	11.6983	9.74133	9.66821	7.7779	10.5112	13.8525	17.6783	15.6208	8.38961	14.3378	13.7811	12.8792	4.4121	7.30354	5.55431	6.0557	15.3519	15.4128	7.16683	16.5348	20.2439	21.2817	12.418	12.5739	8.30616	581	0.763916
582	8.85527	7.65427	9.41238	4.57714	8.07808	6.05683	2.89851	10.4145	7.31763	9.91466	5.5999	4.36214	12.0572	14.2549	12.8045	6.09415	6.13052	5.77949	1.53715	0.927844	1.76763	582	10.9699	9.96112	10.5126	8.38638	10.1984	13.5553	18.1152	15.5603	8.90025	13.8265	12.6367	11.2526	4.87201	6.33305	5.20381	6.01373	15.187	17.2825	7.64469	16.1673	19.3588	22.4882	12.4934	12.498	8.40812	582	0.597362
583	10.1992	9.18018	9.98194	5.99147	7.60256	5.17333	3.3034	10.4163	7.35259	9.26328	6.21152	4.21772	12.7337	14.5295	13.2622	6.04681	7.73531	5.04599	1.26629	0.473957	2.17488	583	12.1301	10.336	9.95184	7.35347	10.5713	12.3104	19.0285	15.3537	9.45204	15.1532	12.9956	10.3606	4.79326	5.68539	5.36872	6.99244	15.6594	16.6338	8.62567	15.7073	20.4565	22.2487	12.2696	10.3908	7.70419	583	0.789832
584	9.67894	8.023	10.1173	5.24804	7.01334	5.5636	3.84848	11.2224	7.84821	8.79231	6.69546	3.31285	12.3332	14.8246	13.6125	6.98329	6.81476	5.36881	1.23024	-0.0435769	0.8444	584	12.285	10.2419	10.379	5.64922	9.92145	11.0465	18.685	13.6318	9.98986	16.4368	13.3767	11.356	5.33901	5.73139	4.94245	7.18706	15.0072	16.1525	9.33928	16.0201	21.0638	22.391	12.1658	11.6577	7.69599	584	0.855419
585	10.5578	8.162	10.0253	5.77805	7.10801	5.98159	3.25159	10.6859	7.44862	8.39534	6.42306	3.00893	13.302	14.449	13.4505	6.31481	6.39404	5.33555	1.24781	0.981734	1.36038	585	11.5658	9.79402	9.47348	7.84523	8.7338	10.9997	18.2942	14.8676	9.90676	15.6787	13.1282	11.4444	5.08425	7.18953	4.20215	6.47531	15.5032	17.1693	11.0797	14.3444	20.1135	21.9854	11.3464	11.8499	7.22371	585	0.850984
586	10.4721	7.13525	10.5009	6.26911	6.9459	6.93418	2.2964	11.2016	7.41897	8.48828	6.37879	2.90547	13.8279	13.6268	14.4898	5.51462	7.17189	4.23693	1.28567	-0.0361437	2.13577	586	12.2912	10.2449	10.6465	7.64526	7.90979	11.3988	17.039	15.3765	11.2162	14.6651	14.3746	11.5953	5.13701	7.52117	3.19198	6.38859	15.3704	16.3995	10.5106	14.5415	18.0515	21.1238	11.6031	10.9329	7.34051	586	0.996902
587	10.6666	6.64855	11.1705	5.19832	6.29313	7.54488	1.74522	11.0672	8.20886	10.4025	4.70055	3.99355	13.948	14.0524	13.6769	5.48026	4.89735	5.20469	1.08286	0.31786	2.53825	587	12.1806	10.5712	9.73171	8.73164	8.76041	11.4259	17.3071	13.2427	11.1867	15.7427	15.7696	10.8978	4.89761	7.64118	2.22355	6.45813	15.4005	17.3603	10.2745	14.4916	16.2709	21.5451	11.5163	10.7141	8.28819	587	0.536748
588	12.1574	5.44308	11.9501	6.1336	6.45525	7.10005	2.64121	10.4489	8.04026	8.74142	4.89676	4.87644	13.3831	14.0119	13.0863	5.08895	6.47988	4.38081	0.573587	-0.0784198	1.58546	588	13.6472	11.1477	8.32897	8.38434	9.92709	12.7633	16.9267	13.4567	10.1471	14.4896	14.8283	11.0008	5.11102	8.26204	1.30414	6.46172	15.4768	15.4564	10.1611	15.5287	17.1791	20.269	11.8354	8.32608	9.17299	588	0.851376
589	11.7471	6.62986	12.1706	5.46477	7.10542	6.48274	3.50628	10.6437	6.07417	8.51014	5.19853	4.76522	13.2812	14.7945	14.4288	5.17409	5.68543	4.1545	1.00309	-0.523945	1.30506	589	12.6059	11.7066	7.41805	8.10071	9.71222	11.2985	17.0964	13.657	10.3312	14.3688	13.7161	10.6641	5.1122	6.73589	0.93784	7.04559	15.3993	15.1067	10.2855	14.5065	15.2475	20.1135	12.4647	11.965	9.14759	589	0.601022
590	11.866	6.12875	10.2896	5.07358	7.11363	7.03977	2.75963	10.2732	5.73697	8.12579	3.72628	5.6162	13.0707	16.8314	13.3461	4.89272	3.94359	4.90211	1.86841	0.705313	0.888272	590	12.5016	12.818	6.69685	9.1426	9.49049	12.6889	16.779	12.7432	10.1739	13.467	13.5131	11.7307	5.57329	6.95751	-0.734023	5.21926	15.2652	14.3433	10.3321	16.0386	16.638	19.4209	12.296	11.4468	9.83043	590	0.590509
591	12.3028	6.20857	9.71162	7.21144	4.91109	6.5285	4.23988	10.9424	7.31985	8.57869	3.83908	5.46661	13.2302	16.6979	13.032	5.77804	4.97471	3.73696	1.05357	-0.179697	1.20158	591	11.3158	12.7006	6.20887	9.71558	9.04906	12.8813	16.2887	12.9505	9.15615	14.1426	13.423	10.9396	6.09463	7.43876	-0.94716	6.44014	15.2123	14.3004	10.7255	14.7687	15.4143	19.3641	12.0248	11.9337	9.86598	591	0.325616
592	11.434	7.02779	9.54091	7.73689	5.31874	5.72376	4.09099	11.2972	6.90034	9.1775	4.35025	5.6231	12.891	14.9749	13.1425	5.11644	5.53213	3.45281	0.469028	0.200324	0.821987	592	12.1064	13.247	6.01107	8.76388	8.66769	13.3765	16.1835	12.9116	10.0365	13.3032	13.2875	10.4701	6.22181	6.15343	-0.883543	7.43124	15.2127	13.9981	13.0018	14.3247	15.9806	20.6599	9.66791	13.3828	9.77652	592	0.969472
593	11.598	6.06567	9.10029	6.17711	5.9901	6.06563	4.78627	10.3137	6.75697	8.10645	3.40621	6.43486	12.884	14.5676	13.696	5.25044	6.25098	4.68014	0.665978	0.542249	1.59261	593	12.0928	12.5557	6.13422	8.99731	9.7743	12.3042	17.1566	12.8209	11.6406	13.5285	11.8661	9.58974	6.24308	6.57667	-1.21946	7.85165	15.6606	14.4888	12.3541	15.5637	16.049	20.845	11.2175	12.4003	10.1851	593	0.797477
594	10.4844	5.26281	8.68778	5.7391	5.84312	4.77646	4.43623	10.5754	6.36446	8.48743	3.81184	5.97186	13.7044	15.1397	13.8281	5.13285	6.37779	3.36714	-0.179959	0.175237	1.99843	594	13.4843	13.8894	5.67318	8.43821	9.33004	12.8669	16.3922	12.7169	10.9824	13.0675	11.2743	8.95686	5.35751	5.32855	-2.08861	7.02201	13.9785	13.3573	13.3224	16.8115	15.5173	22.8212	8.42766	9.80542	10.3578	594	0.625913
595	9.95549	5.98235	8.60624	5.35247	5.62265	4.7879	5.56123	8.88918	6.56802	7.80158	4.01529	7.70832	12.5269	15.7178	12.9781	5.63488	6.6452	3.45498	0.132817	0.270474	1.75094	595	14.0107	12.1793	5.57543	8.32394	9.93798	13.889	15.2514	12.4581	11.6903	13.3316	11.525	8.5805	5.80522	5.22094	-1.84995	7.9068	14.4393	13.8236	12.967	16.0849	14.7785	22.793	10.8563	11.5786	10.1738	595	0.839204
596	11.3386	7.30229	7.87079	5.90154	6.01258	6.16903	5.83072	9.3727	7.14771	6.99882	4.38856	6.68705	12.9461	14.3235	14.1309	5.82538	7.18814	4.27561	0.619557	0.237954	1.32127	596	12.5144	12.1127	4.53289	7.82238	8.80919	13.4965	17.3829	12.354	11.1568	11.3418	11.7391	8.5805	6.21394	4.31486	-2.11819	7.95196	15.3812	13.8552	12.7447	17.019	15.0508	22.7122	11.162	11.5921	10.3906	596	0.184425
597	9.54365	5.25152	7.69526	5.34833	6.67658	6.43655	4.74796	8.66351	5.95602	7.63463	5.46625	7.30136	12.797	14.1126	12.7899	5.63641	6.87799	4.90861	0.0967621	-0.454259	1.15246	597	11.9819	12.1296	5.18751	8.68674	8.83338	13.7497	17.7613	13.3675	10.8566	11.6497	11.2187	8.07911	6.24308	5.48057	-2.03958	8.81877	16.4825	14.5614	12.6704	17.062	14.6506	23.9502	10.8421	11.4329	11.3121	597	0.0263318
598	9.85411	7.09787	6.94736	4.0173	5.13458	6.11051	4.64564	7.74213	6.52863	7.2772	4.81121	7.35697	11.8992	13.7492	11.8183	6.60954	7.10265	3.79408	0.552405	-0.00315909	1.64888	598	11.949	12.2858	4.97315	8.50881	9.64288	13.8751	16.5455	13.0707	10.8453	11.6867	11.9158	7.22075	6.62109	6.64108	-2.8743	7.44842	17.39	13.4001	13.5432	17.4248	15.1077	22.104	8.47023	12.2438	10.4859	598	0.698689
599	9.54365	6.24712	8.017	4.55062	5.61573	6.18179	4.69136	8.84788	7.13974	7.26963	6.05787	7.98379	11.746	14.3762	13.0837	5.93877	7.9681	2.14957	0.812901	1.1657	1.19633	599	11.8117	11.7777	4.85808	8.29701	10.6967	13.4854	16.5375	12.6258	10.5459	11.5813	12.2229	8.57662	6.34191	7.09272	-1.14571	6.82819	16.5985	14.6825	12.5579	17.4027	17.2165	21.0208	10.1289	12.3844	8.00185	599	0.386527
600	9.69609	6.4161	9.25292	3.99367	5.7104	6.14351	4.93995	7.91562	6.37375	6.9042	5.91869	7.67771	11.2643	15.6183	11.5308	6.24724	6.1549	2.50024	-0.211056	0.617509	1.53491	600	12.3783	11.2565	4.97084	8.02358	10.6882	13.7012	16.6398	12.3827	11.5066	11.5736	11.1945	6.97372	5.72489	6.20584	-1.87061	8.00911	17.2844	13.7893	13.1838	15.7905	14.7327	23.2322	11.1899	12.5155	10.2015	600	0.605506
601	6.8848	5.5194	6.94495	4.31151	4.91498	6.09467	6.10587	7.26209	6.5158	6.87897	4.95805	7.00606	10.8697	14.7232	12.5941	5.30465	5.54237	2.45432	0.552405	0.722503	1.35608	601	13.3325	10.6946	5.51693	8.29496	11.1776	14.5125	15.9336	13.4744	10.8935	11.9705	12.5449	8.28044	6.3427	7.07872	-1.79201	7.34132	16.9096	13.1283	12.268	16.0249	16.4824	21.9743	11.9274	11.4277	10.5887	601	0.753436
602	8.22802	3.87629	7.96639	4.24065	6.82097	5.75104	4.74447	7.22296	6.18834	7.08586	4.79291	7.06598	10.5414	14.1702	11.9758	5.04199	7.8374	2.99261	0.892222	0.555721	0.666526	602	13.1659	9.73041	6.28007	8.37373	10.5798	14.5697	16.1872	13.2694	10.6807	11.5783	11.3402	7.14487	6.40019	6.93671	-1.52174	8.22171	16.5937	12.8575	13.0112	16.3181	16.6301	22.8534	10.1832	11.0139	9.90191	602	1.39637
603	8.85006	3.96234	8.9115	4.0173	6.20451	5.56448	5.96699	7.50037	6.46978	6.9656	3.66287	6.43055	10.7113	14.6687	12.736	6.24724	6.21848	1.82783	0.0715238	0.409381	1.55542	603	13.5813	10.208	6.38513	8.3268	10.5435	14.12	16.139	12.7098	11.4297	12.6818	10.4341	6.60167	7.28496	7.50316	-0.351918	7.6846	16.6118	13.6167	12.486	16.4862	16.7316	23.3441	7.95086	11.6021	9.65581	603	1.23641
604	10.2984	5.00505	8.60142	5.73247	6.14529	6.53422	5.97613	6.62595	6.12639	7.40756	4.17404	6.19344	9.89461	13.5204	12.3932	6.24877	4.77689	1.92435	0.846703	0.59521	1.20778	604	13.5484	9.72665	5.60891	9.07567	10.8934	13.1427	15.6045	13.9287	12.1982	11.8196	10.3381	6.48526	7.23023	7.8828	0.413103	5.77795	17.2166	13.2125	13.3536	15.6192	17.4373	23.7911	10.8109	11.9277	8.58898	604	1.3577
605	10.3211	6.6392	8.63194	4.68364	6.3623	6.25747	4.74621	7.64125	5.80468	7.98913	4.46475	6.58617	9.188	13.6409	10.9305	6.25831	7.28422	2.8509	0.335625	0.650959	0.540631	605	12.9793	9.47149	6.67723	9.02955	9.64893	12.9417	14.3377	12.3674	12.8292	11.4884	9.99907	5.7183	7.46491	7.77399	1.15989	5.98416	16.4565	12.803	12.5816	15.063	17.594	22.5879	10.6965	12.3538	8.65578	605	1.12813
606	10.4571	7.13097	10.3322	5.35827	6.6943	6.61298	5.56732	7.41558	4.92585	7.51563	4.96103	6.80776	9.62833	13.8689	11.0544	6.10179	7.45766	2.03678	0.694371	1.56802	1.23639	606	13.8137	8.10534	7.01897	9.35563	9.01882	12.9926	14.9031	13.3636	13.1383	11.8471	10.0556	7.08581	7.32001	6.8695	1.18015	4.76688	14.237	13.0346	13.3292	16.5393	18.0126	25.2442	11.6988	11.9964	8.13741	606	0.93252
607	10.6323	6.94914	11.0427	5.13036	5.81415	5.68416	4.31085	6.73335	5.49182	8.04674	5.482	5.6162	9.62201	14.3228	11.0297	6.36215	8.40118	2.20958	0.979655	0.841898	-0.114593	607	13.7296	8.81438	6.95508	9.27768	8.4512	13.074	16.0953	13.5549	11.9835	11.783	8.97868	7.20609	7.0869	7.9084	0.709306	4.75089	14.6757	13.1188	12.4994	15.3039	19.3678	24.1967	12.3102	10.8797	8.10967	607	0.92638
608	9.04684	5.95743	10.9761	5.64586	4.74379	4.71618	5.62653	6.71031	6.66493	6.80538	5.73482	6.67412	9.66403	15.1965	9.81031	6.55915	8.01331	2.35129	0.359061	0.829354	-0.0716741	608	13.5777	8.9732	6.68031	10.6616	8.52215	13.8048	16.444	12.9666	12.5796	12.908	8.79049	7.41475	6.85419	7.81799	1.13153	4.61741	14.955	12.8409	11.7443	15.6087	18.749	20.0731	10.3381	12.9599	8.14209	608	0.983015
609	9.92344	4.57675	10.8021	5.75816	5.50852	5.32161	5.40057	6.94728	6.16754	8.16238	6.62013	6.22017	10.5975	14.0394	10.0094	6.55036	6.13865	1.27616	0.807042	0.230056	0.589749	609	15.2477	9.41767	7.53619	9.96411	9.59773	14.7308	15.9649	13.0722	11.2845	13.7603	7.80962	8.6068	8.317	8.54286	-0.00628063	4.35965	14.2037	12.3156	12.8134	14.7707	18.5868	24.4812	13.1697	13.0278	8.26671	609	0.74303
610	9.23506	4.99026	10.1402	5.287	6.11071	4.92606	6.13591	7.45037	8.02433	6.9656	4.84313	7.07116	9.68263	13.8743	9.96862	6.03536	6.45303	1.08746	-1.04527	1.05096	1.42762	610	15.3301	9.29648	7.93181	10.9036	8.14643	14.0358	16.7895	13.4347	12.4475	13.6739	8.17538	9.05343	7.96577	8.84169	-0.30532	3.89128	13.8256	12.2122	11.5086	15.1093	19.5987	19.2487	10.761	12.1044	7.52879	610	0.77026
611	7.52473	6.0427	8.9834	6.43901	5.04251	4.27047	6.05755	7.10947	6.69502	7.97062	6.45626	7.05995	10.4309	13.6081	10.6648	6.47096	7.74979	1.97677	0.793071	0.847937	-0.105532	611	15.3546	9.69504	7.71245	9.96289	8.1174	14.2906	17.6016	13.3939	12.6184	14.3073	8.35804	9.58845	8.32527	8.63527	-1.12585	3.35377	13.1569	11.9433	11.1938	13.6326	20.6726	24.2428	13.2237	12.1374	6.74596	611	0.735372
612	8.6883	5.60856	8.3552	6.71914	5.76963	5.21073	5.69053	7.59908	7.81812	6.88318	5.96636	7.23885	10.0914	12.6436	10.3141	5.63297	6.01607	3.04648	0.606938	1.14759	0.862044	612	16.0024	9.44477	7.74632	9.65518	9.52919	13.134	17.594	12.5606	11.1929	14.168	7.67963	9.17975	9.56443	8.34244	-1.17529	2.70516	13.0987	12.2709	10.2579	13.4521	19.8711	24.6706	13.664	12.7708	6.97604	612	1.03279
613	9.33531	6.49475	8.01459	5.77805	5.38791	4.15123	4.68962	8.06259	8.22567	6.87224	5.72971	6.69136	10.0173	14.1126	10.2179	5.85058	5.42403	2.17632	0.418101	-0.0370729	0.50582	613	15.1266	10.0386	7.96337	10.8464	9.1579	13.3227	18.6048	12.8198	13.1966	14.5189	9.5509	9.86868	9.20808	7.61157	-1.81672	3.37935	13.1208	11.8203	10.9774	13.8783	20.1409	20.1471	13.6615	12.6028	7.07058	613	0.832399
614	9.23804	6.23271	7.51411	4.75367	5.28156	4.49354	5.40057	8.60612	7.40968	7.11866	5.03637	6.03437	10.2509	14.4978	9.71824	5.41842	7.168	2.46698	-0.453074	0.233773	0.588319	614	15.1021	9.64762	7.65857	10.1918	9.62796	12.3531	18.6533	13.7422	15.1463	13.7999	9.08149	10.5947	10.1031	8.01161	-1.5031	2.59367	13.7521	11.3856	11.2546	12.6337	20.1672	19.4088	13.5131	13.9789	5.98421	614	0.648781
615	11.3267	5.72732	7.19238	4.49053	5.89197	5.52488	3.03173	9.97275	8.14646	7.18552	4.92059	5.70329	9.98759	13.7499	9.62429	5.92006	5.05242	2.52482	0.217095	0.294632	0.106677	615	14.2676	8.83734	8.23737	9.79842	9.28247	12.6264	18.3853	13.9039	16.2321	13.5681	9.59635	10.0217	9.82077	7.27154	-1.82645	1.21892	14.7977	11.3664	11.1346	11.5898	19.3221	23.5549	13.1357	14.2875	6.72564	615	1.08021
616	11.2558	5.77054	6.9088	4.69607	4.71094	4.91242	4.71487	8.75396	8.25001	7.39915	4.47581	6.29216	11.2219	14.6382	8.87425	6.59274	4.11526	2.86283	-0.478312	-0.538346	1.05947	616	14.1468	9.27503	8.75037	10.8207	9.15952	11.8796	17.1542	14.0822	14.5852	12.7364	9.08064	11.2702	9.79241	6.8231	-1.22675	1.00992	15.6871	10.7422	10.3803	11.7136	18.5959	21.9239	10.6446	13.7228	6.7608	616	0.639788
617	11.2853	5.73511	6.72082	4.23941	4.42043	5.36869	4.4075	8.28913	8.38498	7.21496	4.70352	5.44161	9.60676	15.0886	9.20361	6.23235	6.16938	3.3393	-0.274152	0.957576	-1.1971	617	14.3836	9.31417	8.7419	10.12	9.43284	12.9672	17.1386	13.4076	13.5663	12.2367	8.66688	10.8594	7.97364	8.32324	-1.54524	1.08345	16.0114	10.1165	10.7136	11.0324	18.7605	22.7473	12.6848	13.6703	7.50106	617	0.905996
618	10.822	5.24334	6.75014	4.65919	5.34425	4.23219	3.74791	9.1579	6.74591	7.51815	5.482	5.09027	10.4707	13.9017	9.67295	6.22548	5.53425	2.45216	-0.249815	-0.0291751	0.189653	618	14.5	9.0974	7.91449	9.40174	9.82671	12.2726	17.1313	12.8681	12.578	11.5547	8.61038	12.0381	7.62044	7.02872	-1.47068	0.329338	16.1241	10.0401	11.0287	10.3705	19.0008	16.8458	12.5287	12.5329	7.48309	618	0.845913
619	9.81871	5.30953	7.37955	4.2506	5.61573	4.94321	3.82802	9.36923	8.53897	6.49378	6.02935	5.06526	11.1331	14.2732	10.2235	5.8941	5.66918	2.54759	0.946755	0.0247152	0.443349	619	14.3379	9.29197	7.95836	10.3979	9.57757	11.8965	15.9308	12.658	13.5775	12.6749	9.73951	12.5537	7.96026	6.98271	-1.82604	0.308158	16.3533	10.878	11.1761	10.0959	18.8188	22.6261	10.7642	13.2835	7.21081	619	0.815503
620	10.0539	5.34691	7.00681	3.89629	6.48205	5.21161	4.46061	9.76448	8.13584	7.51479	7.54799	4.36645	11.1055	14.9471	10.42	5.51462	6.9391	2.12788	0.501027	0.141323	0.926422	620	14.0297	9.0974	7.89794	9.17157	8.78379	12.2935	16.1382	13.6039	12.2794	10.9492	7.76501	11.563	7.21645	5.68859	-2.19883	0.549537	16.4777	10.3635	11.9398	10.9942	19.0843	17.2446	13.9068	13.2061	7.05339	620	1.01171
621	9.92045	5.22193	6.86221	4.92606	5.17349	4.50894	3.71091	10.7002	8.15841	7.4269	9.23816	4.52725	10.4681	15.5237	10.2957	5.41116	6.5205	2.30285	0.72637	0.802409	1.27597	621	13.7636	10.0616	7.57006	9.68864	8.82814	12.7308	16.3962	13.5321	12.6444	10.5475	8.96424	11.1702	6.96562	6.38306	-1.93747	-0.081885	15.958	11.3006	11.7704	11.2745	18.5191	22.2094	11.8155	13.3399	4.67441	621	1.05791
622	8.89292	6.33122	6.05807	3.81839	5.2232	3.82476	2.38347	11.0307	7.95751	8.06944	8.87425	6.15852	9.36539	15.3117	11.2483	5.98725	6.3838	2.36069	0.72637	0.47024	0.979355	622	13.2585	8.76997	7.22909	9.73965	7.1922	11.6548	16.1462	13.2454	12.6456	10.7815	9.93789	12.7507	5.60322	5.7874	-2.34754	1.16537	16.6575	11.3131	12.4647	11.7149	20.0688	19.2126	13.1211	12.6243	4.80918	622	1.31435
623	8.36554	6.60611	6.42961	3.43839	4.92708	3.54096	3.77752	9.2453	8.431	7.37518	7.34454	5.53602	9.79866	14.4704	11.9253	5.88456	6.44102	2.25875	0.640739	0.276513	0.523941	623	13.5356	9.17229	7.25141	9.70088	8.40242	11.3934	17.2766	12.4514	11.0822	11.1999	9.3266	11.4513	6.08046	5.87781	-1.84954	0.605486	15.9921	10.9509	13.0069	11.5725	20.1124	19.383	13.4495	12.6001	7.70731	623	0.875137
624	9.06771	5.18688	7.37835	3.80513	5.50031	4.56482	4.67873	8.72874	7.16364	6.85836	6.8555	6.25681	10.4209	14.8494	10.5907	6.5454	6.12664	2.28261	0.578545	0.447011	0.964095	624	14.0151	8.65293	6.67299	9.96574	8.48386	12.2487	18.1185	12.8567	11.1754	11.116	9.01224	11.6246	7.17156	6.06222	-1.78269	0.647847	16.367	11.4462	12.6246	11.9163	22.4165	15.5046	14.9168	13.0818	7.05339	624	0.749919
625	8.54817	5.6327	6.48665	4.00072	3.89692	4.40159	4.74796	9.93362	7.35392	5.59262	6.42391	6.00721	10.297	16.0237	11.2123	6.02543	4.92772	2.43155	0.732228	-1.25332	0.586411	625	13.4789	9.49143	7.11518	10.0437	8.01783	11.6293	18.7216	11.4269	10.9164	11.7271	8.23103	12.3045	6.37853	7.29234	-1.61898	0.555132	16.0162	10.9411	12.6475	10.2117	23.6838	21.7702	14.5908	11.7911	7.27371	625	0.67269
[truncated: 77 more columns]

## Sheet: Fig 8C
Source Data	Figure 8C	AWC VGLUT-pH data: Odor removal response magnitudes
		plus supporting statistical analysis
	wt 10-sec pulse	wt 60-sec pulse	wt 180-sec pulse	pkc-1(nj1) 10-sec pulse	pkc-1(nj1) 60-sec pulse	pkc-1(nj1) 180-sec pulse		Descriptive Statistics	wt 10-sec pulse	wt 60-sec pulse	wt 180-sec pulse	pkc-1(nj1) 10-sec pulse	pkc-1(nj1) 60-sec pulse	pkc-1(nj1) 180-sec pulse
	0.856666	2.1772	3.18147	0.061578	0.459403	0.811915		Number of values	60	29	8	102	48	15
	0.886574	2.56333	2.70056	0.00514957	0.479225	1.65822
	0.454556	2.00609	1.84559	0.237229	0.190785	0.57757		Minimum	-0.3929	-0.1043	1.448	-0.2693	0.06722	0.3368
	0.501221	1.78737	1.4477	0.0967016	1.21011	1.03284		25% Percentile	0.4621	1.336	1.675	0.02917	0.2322	0.4551
	1.05757	1.42134	4.10103	0.341937	0.882349	1.23729		Median	0.8544	2.006	2.941	0.119	0.4757	0.5776
	0.600306	1.8346	3.62931	0.0213846	0.453941	0.571295		75% Percentile	1.428	2.606	3.983	0.2639	0.8595	1.156
	1.02546	1.29294	1.61794	0.158798	0.252949	0.454133		Maximum	2.434	3.756	5.074	1.734	2.669	1.679
	0.732744	0.26862	5.07368	0.056356	1.14032	0.515992
	0.858369	1.37824		-0.0534854	0.760992	0.406018		Mean	0.9342	1.848	2.95	0.1759	0.6503	0.8017
	0.456108	1.45023		0.046524	0.47217	0.33677		Std. Deviation	0.6393	1.035	1.291	0.2581	0.5801	0.4474
	0.432898	0.991604		0.315632	0.128391	0.670448		Std. Error of Mean	0.08254	0.1922	0.4564	0.02555	0.08372	0.1155
	0.780731	1.75198		0.0684685	0.117074	0.463327
	0.333983	2.64895		-0.0734622	0.335144	1.67901		Lower 95% CI	0.7691	1.454	1.871	0.1252	0.4819	0.554
	0.0804639	2.76823		0.00411984	0.210097	0.455107		Upper 95% CI	1.099	2.242	4.029	0.2266	0.8187	1.05
	0.751532	2.87841		0.0655201	0.294873	1.15624
	0.370267	0.452206		0.126545	0.283059
	0.203955	2.9376		0.140715	0.233206			Two-way ANOVA
	0.105732	2.30236		0.317394	0.220978			Tukey's multiple comparisons test	Mean Diff.	95.00% CI of diff.	Significant?	Summary	Adjusted P Value
	0.653127	-0.000726482		-0.00845745	0.246631
	0.54912	-0.104336		0.912801	0.382766			wt 10-sec pulse vs. wt 60-sec pulse	-0.9137	-1.301 to -0.5262	Yes	****	<0.0001
	1.57091	0.0275308		0.257454	0.613534			wt 10-sec pulse vs. wt 180-sec pulse	-2.015	-2.66 to -1.371	Yes	****	<0.0001
	0.76191	2.02924		0.0942883	0.0672208			wt 10-sec pulse vs. pkc-1(nj1) 10-sec pulse	0.7583	0.4796 to 1.037	Yes	****	<0.0001
	1.00334	2.19232		0.261408	0.190367			wt 10-sec pulse vs. pkc-1(nj1) 60-sec pulse	0.2839	-0.04783 to 0.6156	No	ns	0.141
	1.16556	2.09854		0.116175	0.231871			wt 10-sec pulse vs. pkc-1(nj1) 180-sec pulse	0.1325	-0.3621 to 0.627	No	ns	0.9724
	1.8927	2.31244		0.0933741	1.75398			wt 60-sec pulse vs. wt 180-sec pulse	-1.102	-1.786 to -0.4177	Yes	****	<0.0001
	1.4368	1.64929		0.0937266	0.658093			wt 60-sec pulse vs. pkc-1(nj1) 10-sec pulse	1.672	1.311 to 2.032	Yes	****	<0.0001
	2.43407	3.61417		0.214922	1.63209			wt 60-sec pulse vs. pkc-1(nj1) 60-sec pulse	1.198	0.7947 to 1.6	Yes	****	<0.0001
	1.68637	3.75626		0.135161	0.816835			wt 60-sec pulse vs. pkc-1(nj1) 180-sec pulse	1.046	0.5013 to 1.591	Yes	****	<0.0001
	1.42191	3.10195		0.400287	0.87025			wt 180-sec pulse vs. pkc-1(nj1) 10-sec pulse	2.774	2.145 to 3.403	Yes	****	<0.0001
	1.46699			0.278398	0.497886			wt 180-sec pulse vs. pkc-1(nj1) 60-sec pulse	2.299	1.645 to 2.954	Yes	****	<0.0001
	0.73791			0.0369367	1.17409			wt 180-sec pulse vs. pkc-1(nj1) 180-sec pulse	2.148	1.398 to 2.898	Yes	****	<0.0001
	1.30783			0.0465203	0.120454			pkc-1(nj1) 10-sec pulse vs. pkc-1(nj1) 60-sec pulse	-0.4744	-0.7742 to -0.1745	Yes	***	0.0001
	1.12255			0.0307932	0.960752			pkc-1(nj1) 10-sec pulse vs. pkc-1(nj1) 180-sec pulse	-0.6258	-1.1 to -0.1521	Yes	**	0.0025
	0.389288			-0.0493178	0.827182			pkc-1(nj1) 60-sec pulse vs. pkc-1(nj1) 180-sec pulse	-0.1514	-0.6582 to 0.3553	No	ns	0.9559
	1.23973			-0.0011368	0.200687
	1.41729			-0.077791	0.493207
	-0.195182			-0.242771	0.559502			Test details	Mean 1	Mean 2	Mean Diff.	SE of diff.	n1	n2	q	DF
	0.0753922			0.0237794	0.176765
	-0.241439			0.0520016	0.463229			wt 10-sec pulse vs. wt 60-sec pulse	0.9342	1.848	-0.9137	0.1349	60	29	9.576	256
	-0.392897			0.00315979	0.402082			wt 10-sec pulse vs. wt 180-sec pulse	0.9342	2.95	-2.015	0.2245	60	8	12.69	256
	0.193974			0.0755467	0.491626			wt 10-sec pulse vs. pkc-1(nj1) 10-sec pulse	0.9342	0.1759	0.7583	0.09706	60	102	11.05	256
	0.0064022			-0.0658469	0.530639			wt 10-sec pulse vs. pkc-1(nj1) 60-sec pulse	0.9342	0.6503	0.2839	0.1155	60	48	3.475	256
	1.52537			-0.128027	2.669			wt 10-sec pulse vs. pkc-1(nj1) 180-sec pulse	0.9342	0.8017	0.1325	0.1722	60	15	1.088	256
	0.654506			0.0962461	2.10702			wt 60-sec pulse vs. wt 180-sec pulse	1.848	2.95	-1.102	0.2382	29	8	6.54	256
	1.69001			-0.0454338	2.00364			wt 60-sec pulse vs. pkc-1(nj1) 10-sec pulse	1.848	0.1759	1.672	0.1255	29	102	18.83	256
	1.30526			0.0630497	0.168983			wt 60-sec pulse vs. pkc-1(nj1) 60-sec pulse	1.848	0.6503	1.198	0.1403	29	48	12.07	256
	1.43064			-0.0895168	0.487389			wt 60-sec pulse vs. pkc-1(nj1) 180-sec pulse	1.848	0.8017	1.046	0.1897	29	15	7.797	256
	1.31424			0.0194994	1.29163			wt 180-sec pulse vs. pkc-1(nj1) 10-sec pulse	2.95	0.1759	2.774	0.219	8	102	17.91	256
	0.817728			0.0986548				wt 180-sec pulse vs. pkc-1(nj1) 60-sec pulse	2.95	0.6503	2.299	0.2278	8	48	14.27	256
	1.14808			0.3633				wt 180-sec pulse vs. pkc-1(nj1) 180-sec pulse	2.95	0.8017	2.148	0.2612	8	15	11.63	256
	1.49874			0.588424				pkc-1(nj1) 10-sec pulse vs. pkc-1(nj1) 60-sec pulse	0.1759	0.6503	-0.4744	0.1044	102	48	6.425	256
	0.837388			0.447348				pkc-1(nj1) 10-sec pulse vs. pkc-1(nj1) 180-sec pulse	0.1759	0.8017	-0.6258	0.165	102	15	5.365	256
	0.852209			0.574025				pkc-1(nj1) 60-sec pulse vs. pkc-1(nj1) 180-sec pulse	0.6503	0.8017	-0.1514	0.1765	48	15	1.214	256
	1.88022			0.491278
	0.480014			0.179619
	0.584022			-0.0664629
	2.00126			0.024292
	2.38922			0.482122
	1.89818			0.591519
	1.55248			0.463307
				0.0948855
				0.121811
				0.181407
				0.179067
				0.0542116
				0.592459
				0.156019
				0.271367
				0.273279
				0.575872
				0.174891
				0.0526534
				-0.0494909
				0.140932
				0.129973
				0.0134272
				0.237973
				0.108493
				0.1583
				0.05863
				0.337041
				0.281693
				0.32837
				0.256404
				-0.11353
				0.283609
				0.238925
				0.214094
				0.876591
				1.73419
				-0.269289
				0.171828
				-0.140483
				0.116097
				0.341191
				0.12855
				0.174059
				0.256974
				0.112969
				0.022079
				0.206731
				0.0867938

## Sheet: Fig 8D
Source Data	Figure 8D	AWC VGLUT-pH data: individual dF/F(%) traces
		Three trials per animal: Read from left to right; Trial 1 signifies a new animal
		Acquisition Rate: 5 Frames/sec
		Pulse 1
		Stimulus ON:	Frame 25
		Stimulus OFF:	Frame 325
	wt VGLUT-pH																			pkc-1(nj1) Rescue Array Negative VGLUT-pH
Frame / Trial #	1	2	3	1	2	3	1	2	3	1	2	3	1	2	3	1	2	3	Frame / Trial #	1	2	3	1	2	3	1	2	3	1	2	3	1	2	3	1	2	3	1	2	3	1	2	3	1	2	3	1	2	3
1	-0.850352	2.09887	2.4806	2.04529	2.20521	2.00236	0.691512	1.89002	2.38939	1.59935	5.72291	3.08334	3.5116	4.16133	3.32222	4.66323	4.3294	4.15053	1	-0.360603	-1.29349	-0.537511	0.630093	0.00255941	-0.34648	0.0302218	0.0367298	-0.732219	-0.276169	-0.206571	0.00413811	-0.135112	-0.469123	0.167062	0.202745	0.317699	0.289456	0.386345	-0.920706	-1.1697	0.88148	0.588177	0.388437	-0.526983	-0.645349	-0.497314	-1.55006	-0.159251	0.0437833
2	-0.167309	2.57236	2.18302	2.18625	1.89479	1.90078	0.682221	1.63493	2.09165	1.96374	5.78065	3.33891	4.22381	2.69216	3.71335	4.68003	4.52666	4.50491	2	0.168304	-1.30837	-0.780103	-0.259985	-0.464382	-0.589418	0.180653	-0.0633291	-1.0819	-0.443667	0.422787	0.108527	-0.615475	-0.750161	0.211898	0.13058	1.06815	0.2369	0.12401	-0.0533561	-1.29576	0.841984	0.627691	-0.322093	-0.457448	0.16662	0.152954	-1.4449	0.170089	0.576548
3	-0.722949	1.96852	2.2021	2.2688	2.08735	1.61531	1.04092	1.27683	1.88649	-0.0872599	6.04745	3.46524	3.78558	2.63916	3.91364	3.83672	4.36456	4.1	3	0.116297	-1.06859	-0.496081	-0.348769	-0.782912	-0.593131	-0.0383062	-0.347763	-1.54712	-0.231894	0.190014	-0.129142	-0.744098	-0.478978	0.152137	-0.0734062	1.42807	0.348742	-0.322038	-0.492547	-1.02873	0.0284949	0.687412	-0.455838	-0.683183	-0.314307	0.664991	-1.11785	-0.30888	0.354684
4	-0.295178	2.10699	3.12405	2.20419	1.9571	2.49432	0.502626	1.64377	1.39144	1.21276	6.10676	2.72104	4.89516	2.54798	4.12821	4.25701	4.60243	4.29363	4	-0.252112	-1.09617	-0.451641	-0.479946	-0.45539	-0.0198355	-0.32987	-0.154196	-0.838309	0.106017	0.0452681	-0.249677	-0.739957	-0.0725855	-0.131993	-0.131561	0.620224	0.247966	-0.612832	-1.54577	-1.62587	1.8144	1.2236	0.494418	-1.05797	-0.409992	-0.177925	-0.324766	0.616416	0.1649
5	-0.233738	1.71266	2.75271	2.4846	1.76434	2.27349	0.463195	1.32683	2.05746	1.4634	5.46035	3.31865	3.60374	2.88368	3.20986	4.21148	4.40664	4.10547	5	-0.105391	-1.28326	-0.471532	0.0756746	-0.73241	-0.180632	-0.46574	-0.0749902	-1.02324	0.0899215	-0.294697	-0.109649	-0.306795	-0.640826	0.298272	0.100786	0.634361	0.201596	-0.793048	-0.125542	-1.22827	0.705466	1.44317	-0.527908	-0.413104	-0.282238	-0.0700505	-0.886522	0.20804	0.0446687
6	0.139985	2.22055	2.36304	2.17823	2.01555	2.46767	1.0654	1.56848	1.91183	1.80382	5.70627	2.52715	4.17194	2.05983	3.21339	4.59668	4.72853	4.38702	6	-0.331889	-1.11178	-0.857811	-0.159777	-0.316854	-0.192163	-0.718355	-0.15848	-0.561963	-0.0126351	0.271563	-0.0937775	-0.124891	-0.890186	0.139281	-0.354537	0.651439	0.0423396	-0.942147	-1.35525	-1.25247	1.02008	0.620334	0.173578	-0.762602	-0.280384	-0.01231	-0.591238	0.492455	0.397483
7	-0.161327	2.16716	2.77494	2.12297	1.68024	1.92536	2.19434	1.6825	1.78391	1.72443	6.00627	2.94908	4.76778	3.0954	2.42321	4.06101	4.22742	4.10619	7	0.0830727	-1.241	-0.237566	-0.399776	-0.261841	-0.520505	-0.33375	-0.060043	-0.817573	0.131195	0.169254	-0.346499	-0.542148	-0.367693	0.53308	0.0896907	0.595737	0.186043	0.300297	-0.508698	-0.528006	1.19151	1.00506	-0.438703	-1.14279	-0.560367	0.0343213	-0.334569	-0.223277	0.190612
8	-0.314329	2.12385	2.61946	2.31824	1.78067	2.01154	1.42246	1.61578	1.82487	0.611805	5.74938	2.99372	4.23074	2.0858	3.51983	4.28831	4.60971	4.8335	8	-0.694915	-1.02472	-0.686951	0.0768634	-0.738606	-0.0953513	-0.396634	-0.132205	-0.426485	-0.157382	0.0476291	-0.305494	0.0126548	-0.0682697	-0.39672	0.0527928	0.349501	0.313772	-0.00807356	-0.167018	-0.524041	0.841335	1.30965	-0.531219	0.0485428	-0.793006	-0.310061	-0.162971	-0.0640728	-0.203349
9	0.042855	2.48968	2.34178	2.30795	1.92476	2.1784	1.70587	1.35259	1.48057	1.29472	5.63959	2.74043	4.06506	2.12765	2.93084	4.41561	4.16806	4.85877	9	-0.729819	-1.00684	-0.82136	-0.129239	-0.301126	-0.410381	-0.0933331	-0.496912	-0.586497	-0.39761	0.0628629	-0.10329	-0.309055	-1.04497	0.251024	0.21382	0.352605	-0.197567	-0.10505	-0.074468	-0.343749	0.994878	1.48437	0.487296	-0.201279	-0.298356	-0.450407	0.0396512	-0.109157	-0.185041
10	-0.481219	2.52822	2.19791	2.71417	1.47998	2.46632	1.22963	1.26272	1.85227	1.16471	5.38003	2.4584	3.30341	1.93377	3.98326	4.55478	4.02769	4.43083	10	-0.533361	-1.23651	-0.536418	-0.261116	-0.223042	0.210646	-0.246918	-0.205734	-0.609248	-0.208614	0.0418748	-0.38717	-0.00509976	-0.146989	0.376967	0.178004	0.465309	0.161492	0.844757	-1.73862	-0.805555	0.648769	1.62904	-0.826723	0.130417	-0.258067	-0.0868289	-0.890863	0.673001	-0.230217
11	-0.464544	2.61087	2.54376	2.44863	2.01546	2.04297	1.37584	0.862956	1.61063	1.01696	6.30038	3.05427	3.16386	2.90049	3.33456	4.30745	4.76578	4.15652	11	-0.354294	-1.12263	-0.615566	-0.329663	-0.282513	0.161301	-0.24106	-0.261841	-0.125142	-0.260926	-0.149818	-0.205823	-0.210644	-0.011659	-0.237135	-0.25495	0.324519	-0.194024	0.0457037	-1.50799	-0.918338	0.268645	1.50763	-0.381794	-0.210932	-1.14997	-0.409141	-1.08878	-0.333872	-0.278101
12	0.0717211	2.34822	2.24706	1.94324	2.3856	2.21667	1.0706	1.89647	1.70641	1.45376	5.1328	3.34327	3.65204	2.32713	3.07799	4.47347	4.02234	3.93845	12	-0.558263	-1.14898	-0.66912	-0.357573	-0.0175487	-0.285181	-0.244436	0.083497	-0.395736	0.107168	-0.127884	-0.0671441	-0.0884936	-0.564808	0.0829008	-0.136939	-0.146992	-0.314647	-0.841984	-1.26309	-0.751312	1.47475	1.26041	0.222778	-0.599717	-0.000543188	0.0138151	-1.18116	0.319431	-0.656305
13	-0.258225	2.08002	1.82309	2.73728	1.86997	2.22431	1.21336	2.00034	2.0959	1.50239	5.74075	2.86231	4.4527	2.21996	3.05185	3.92369	3.91613	3.80109	13	0.0876865	-1.51539	-0.724913	-0.298798	-0.204049	-0.267795	-0.087387	-0.0382937	-0.777077	-0.423286	-0.103993	-0.245589	-0.240763	0.310625	-0.155042	0.0350866	0.340936	0.363858	-0.348907	-1.17501	-1.09805	0.939552	1.01077	0.176703	-0.688537	-0.073834	-0.322699	-1.13009	-0.0143504	0.183132
14	-0.174332	2.3728	2.16633	2.90256	2.2736	2.40867	0.983082	1.14257	1.24967	1.57935	5.70407	2.42077	3.79365	2.11481	3.21035	4.44275	4.19152	4.14172	14	-0.762753	-1.27732	-1.00983	-0.316929	-0.195432	-0.562586	0.0737148	-0.0866078	-0.788597	-0.15348	-0.192322	0.178144	-0.622271	-0.218149	0.0772047	-0.387292	-0.0627416	0.0605151	-0.550487	-0.232756	-0.0730468	1.09994	1.40995	-0.253553	-0.861603	-0.656526	-0.542457	-0.784932	-0.074222	0.506525
15	-0.0611894	2.50762	2.64257	2.9221	1.99588	2.07411	1.14451	1.95518	1.42794	0.647229	5.55144	3.03949	3.56688	3.59959	2.90996	4.35898	4.34499	4.18407	15	-0.722428	-1.57612	-0.700762	-0.119835	-0.4122	-0.162023	-0.380676	-0.0936784	-0.526457	0.0132477	-0.33597	-0.3852	-0.196965	-0.0706491	-0.0908361	-0.419468	0.673271	0.35147	-0.425363	-0.383249	-0.557022	0.582665	1.80041	-0.627353	-1.09288	0.459945	-0.648912	-1.32848	-0.795466	0.0984189
16	-0.25687	2.4119	2.2788	2.50356	2.2166	2.22091	0.681004	2.32033	1.87572	1.20289	4.83074	2.13612	3.52963	1.10079	3.12076	4.39297	4.05644	4.62058	16	-0.198609	-1.198	-0.525334	-0.14705	-0.481862	-0.323923	-0.163983	0.00619752	-0.747373	0.0389903	-0.0901895	-0.0998784	-0.190439	-0.770414	-0.335749	0.0470167	0.417562	0.128429	0.0986594	-0.906202	-0.879562	0.193065	1.1959	0.374292	-1.44449	-0.763454	-0.274861	-2.35133	0.322184	0.690605
17	-0.251525	2.19188	2.51067	1.76507	1.69863	2.25761	1.12876	1.87189	1.50537	0.957988	5.04123	2.59344	3.99365	2.79597	3.40448	3.2893	4.32301	4.2264	17	-0.225048	-1.6727	-0.932238	-0.231802	-0.340165	-0.0619446	-0.342366	-0.568627	-0.797192	0.307615	-0.0980569	-0.136984	-0.215966	-0.746319	-0.111909	-0.137049	0.394662	0.461108	0.439107	-0.75967	-0.296967	1.00888	0.36617	-0.570222	-0.503154	0.0272446	0.0401998	-2.14307	0.116621	-0.252343
18	-0.265342	2.15525	2.48384	2.6285	2.27265	2.3061	1.04253	1.9071	0.491623	1.11798	5.89498	3.2806	4.22967	2.56798	2.17044	4.05399	3.79749	4.32454	18	-0.320293	-1.11888	-0.4202	-0.445985	-0.0490058	-0.535104	-0.259145	-0.685697	-0.913075	0.0177708	0.184994	0.256092	-0.507689	-0.12202	-0.18669	-0.0197641	0.223645	-0.066691	-0.498986	-1.53338	-1.02968	0.761346	1.23969	0.324468	-0.635121	-0.28087	-0.998574	-1.7569	0.282644	-0.185656
19	0.0997833	1.45164	2.01691	2.70395	2.08135	2.13638	1.29606	1.81609	1.80758	1.15945	5.70132	3.15324	4.10585	3.14833	2.95194	3.73728	3.76313	4.72993	19	-0.276398	-1.43148	-0.473765	-0.230169	-0.426997	-0.358381	-0.367775	-0.49336	-0.207651	-0.013152	-0.222901	-0.206094	-0.476417	-0.962347	-0.13135	0.576378	0.211765	0.393317	0.503445	-1.51003	-0.485724	1.00656	1.58316	-0.387248	-0.234577	-0.270331	-0.786641	-1.33388	0.279656	-0.245234
20	0.0455044	2.00307	2.33659	2.44128	2.1104	2.26472	1.04957	1.12797	1.61429	0.956472	4.7814	3.13264	3.79925	1.42667	3.77092	3.75161	3.73411	4.30521	20	-0.532075	-1.6984	-0.577277	-0.303297	-0.55894	-0.103855	-0.088885	-0.265392	-0.161461	0.327659	0.0523757	0.212016	0.18891	-0.78708	-0.032603	0.1283	0.251646	0.214857	0.125728	-0.219343	-0.252628	0.743922	1.22946	-0.0134248	-1.16831	-0.523456	-0.302157	-1.19671	0.049684	-0.586951
21	0.157445	2.15017	2.60336	2.4675	1.66345	1.7836	0.276762	1.76476	1.76236	1.30523	6.26538	2.66567	4.48997	1.71535	2.85404	4.0745	3.98407	3.96639	21	-0.295507	-1.65655	-0.969457	0.104949	-0.243275	-0.923552	-0.172313	-0.55271	-0.290623	-0.242294	0.228453	0.103375	-0.369861	-0.43272	-0.138327	0.256433	0.328763	0.240596	-0.0840899	-0.356887	-0.00174863	0.85612	0.912269	-0.320956	-0.96231	-0.625502	-0.285391	-1.06264	0.0785714	0.206667
22	-0.0124442	2.11285	2.56939	2.15653	1.94406	2.09272	0.533951	2.01103	1.55011	1.22355	5.03918	3.25878	3.81062	2.59579	2.91403	3.76326	3.34964	5.15786	22	-0.159566	-1.14489	-0.563668	-0.0884693	-0.0841054	-0.611692	-0.116337	-0.439025	-0.719802	-0.000528849	-0.182797	-0.314419	-0.386377	-0.831495	-0.371351	-0.11195	0.0234786	0.268057	0.26171	0.114948	-0.485086	1.49534	1.69609	-0.0685038	-0.343632	0.304775	-0.197963	-0.993919	-0.0962782	0.533999
23	0.48156	2.6214	2.61831	2.84496	1.65351	2.2114	0.726863	1.08122	1.69144	1.31574	4.99869	2.91988	3.9629	2.42955	3.64721	3.57352	4.04605	3.64342	23	-0.447974	-1.02123	-0.488091	-0.371141	-0.247671	-0.28148	-0.846758	-0.176383	-0.771145	0.0832267	-0.153569	-0.0631829	-0.329985	-0.630205	0.307106	0.372399	0.00500553	0.280578	-0.675862	-0.566943	-1.10986	0.395442	0.41832	0.627708	-0.724073	0.0373909	0.600105	-0.58055	0.118515	0.340313
24	-0.478725	1.78822	2.71137	2.96753	1.74504	2.32347	0.479919	1.92422	2.0709	0.81466	4.93783	2.74504	3.3302	1.79153	3.4866	4.09303	3.41119	4.98545	24	0.0162566	-1.4545	-0.51833	-0.0268644	-0.573573	-0.698705	-0.570657	-0.403258	-0.529668	0.217765	-0.243421	0.0252004	-0.235676	-0.411181	-0.15085	0.33967	-0.346547	0.102143	-0.516234	-1.02655	-1.06792	1.47951	1.07498	0.126886	-0.672859	-0.224064	-0.419443	-2.10635	0.00274246	-0.13982
25	-1.30577	2.27826	2.72626	3.10054	2.18363	1.73658	0.644451	1.86099	1.76614	1.0578	5.19546	2.69407	3.5689	2.70901	3.23201	4.35444	3.46915	4.26138	25	-0.263367	-1.28603	-0.491428	-0.0179505	0.0036366	-0.115865	-0.711591	-0.110303	-0.92215	-0.151481	-0.0702187	-0.3592	-0.0632214	-0.475419	0.0714957	-0.077682	0.0659024	0.869734	0.476179	-0.931383	-2.43399	0.491824	1.58207	-0.00249593	-0.449675	-1.17045	-0.148845	-0.246772	-0.347348	0.0621937
26	-1.04501	2.01537	2.39374	2.5927	2.30999	2.22845	-0.160931	1.58535	2.11302	0.866608	5.0182	3.17064	3.47539	2.1742	3.41211	4.38543	3.25491	4.15944	26	-0.468765	-1.65642	-0.555453	-0.161261	-0.515875	-0.579197	-0.38124	0.021969	-0.450139	-0.0010797	0.087401	-0.200471	0.12573	-0.333094	-0.100194	0.045586	-0.45075	-0.066136	-0.152154	-0.67631	-0.746539	0.435175	1.28115	-0.32127	-1.17139	-0.404218	-0.780846	-1.1217	0.0549331	0.259739
27	-0.166141	2.07864	2.68048	2.2983	1.80545	1.94397	-0.0505945	1.99579	2.26245	0.287603	4.85357	2.95363	2.23446	2.29089	3.51508	3.16752	2.84436	3.60896	27	-0.282995	-0.802024	-1.02788	-0.217578	-0.1664	-0.720402	-0.562806	0.0320533	-0.69393	0.133494	0.329662	-0.263818	-0.798767	-0.462698	-0.23593	-0.439288	-0.516674	-0.222599	-0.338897	-0.60579	-0.455427	0.30315	1.10096	-0.45723	-0.804511	0.0322852	0.0653146	-1.03988	-0.197579	0.498154
28	-0.410891	2.33643	2.55171	2.39943	1.89865	2.34078	0.113333	1.42616	1.81404	0.73126	4.23654	2.76701	2.88809	2.61538	2.2025	3.44585	3.11947	3.97188	28	-0.305776	-0.972563	-0.425937	-0.403326	-0.166856	-0.405025	0.0427773	-0.193325	-0.745341	-0.291412	-0.133313	-0.153705	-0.182389	-0.436868	-0.0347298	-0.369947	-0.36024	0.119187	-0.703792	-0.680621	-1.40316	0.0442804	0.751282	-0.464966	-0.544263	-0.757104	-0.249472	-0.83677	-0.303106	-0.480913
29	-0.858971	1.58414	2.20242	2.21528	1.75746	1.91157	0.380812	1.43178	1.94459	0.808811	4.47899	2.72576	3.67448	1.89054	1.97821	3.56392	2.51043	3.5325	29	-0.032498	-1.53873	-0.872973	-0.0606023	-0.074825	-0.782157	0.040788	-0.311743	-0.66812	-0.132096	-0.169324	-0.288611	-0.235605	-0.650527	-0.228801	-0.514818	-0.0361545	-0.0932344	-0.304469	-0.201401	-0.648254	0.620125	1.25059	-0.541145	-0.872634	-0.952455	-1.0178	-1.74143	0.260144	0.0501164
30	0.0317865	1.77441	1.6286	2.0369	2.13312	2.49671	0.407388	1.48447	1.49972	0.860614	4.3919	2.87297	3.49341	2.75793	2.03197	3.00948	3.03005	3.93541	30	-0.894861	-1.37874	-0.749424	-0.304841	-0.268387	-0.273012	-0.050027	-0.403039	-0.889878	0.204497	-0.0921459	-0.298764	0.0056031	-0.158724	-0.0552911	-0.00335355	-0.319211	-0.182224	-0.455447	-1.82093	-1.78058	1.23193	0.788788	0.185824	-0.412182	-0.51588	-0.294061	-1.06375	0.285904	-0.105728
31	-0.620619	2.64105	2.04862	2.44677	1.5046	1.84851	0.746466	0.973243	1.31419	0.0743733	3.59414	3.23196	3.07723	1.41273	2.33825	3.42505	2.56288	3.6003	31	-0.58734	-1.41026	-1.16009	-0.0321092	-0.331772	-0.301861	-0.204095	-0.288104	-0.77723	-0.127587	-0.161403	-0.103759	0.0839963	-0.399109	-0.323171	-0.39021	-0.352742	0.265348	-0.175325	-1.43275	-0.744655	0.502991	1.89994	0.448987	-0.414228	-0.181744	-1.11095	-0.83788	-0.613888	0.445822
32	-0.586312	1.76504	2.32147	2.4399	1.61181	1.69313	0.933114	1.32572	1.46691	0.0482281	3.77868	2.4666	2.75349	1.50362	3.89043	3.75189	2.45133	3.39847	32	-0.434091	-2.01789	-1.11948	-0.133033	-0.24608	0.00363757	-0.170116	0.70545	-0.865061	0.387504	-0.16268	-0.554742	-0.0344885	-0.230517	-0.348679	0.260102	-0.578757	0.0243267	-0.151453	-0.0951649	-1.63878	0.955083	1.17364	-0.919593	-0.711064	-0.264332	-0.425405	-0.931064	-0.141098	0.315878
33	-2.2398	1.74236	1.98692	2.38472	1.78139	1.76571	0.457004	1.72071	1.63782	0.0132122	4.7662	1.88558	3.45115	2.74963	3.36865	3.17813	2.14525	3.97837	33	-0.708056	-1.93431	-0.620974	-0.0982019	-0.280153	-0.109594	-0.183421	0.717689	-0.391746	-0.251509	-0.598664	-0.468449	0.142241	-1.30083	0.0224747	-0.658569	0.464108	0.181848	-0.327729	-1.08534	-0.58599	-0.0967208	1.65553	-0.39821	-0.734216	-0.64757	-1.12348	-0.644451	0.150723	-1.12495
34	-0.124473	1.86888	2.38795	2.36451	1.50661	1.6457	0.410624	1.5686	1.2194	0.110948	4.56627	2.39467	2.68348	2.6069	3.94266	3.02012	2.64546	3.21689	34	-0.213194	-1.67009	-0.701054	-0.400421	-0.626973	-0.274383	-0.214216	0.207142	-0.701324	-0.178357	-0.354661	-0.526993	-0.675301	-0.712061	-0.0333096	0.0372872	-0.0427996	0.0510838	0.861148	-0.336992	-0.34095	0.452247	0.819189	-0.0973849	-0.784013	-0.295996	-0.402169	-1.49288	-0.556621	-0.0885195
35	0.266275	1.68081	1.93143	2.2416	1.5131	1.95706	-0.142969	1.28739	0.373239	0.365674	3.48728	2.05704	3.73429	2.42546	3.96418	2.52401	3.20988	2.77373	35	-1.03608	-1.64056	-0.787503	-0.119951	-0.346541	-0.29284	-0.350193	0.0253579	-0.827738	0.00259952	-0.532494	-0.333005	0.0242318	-0.232836	0.0551686	-0.201793	-0.156794	0.0182669	-0.605933	-0.888838	-0.662458	0.501166	0.714171	-0.0730727	-0.16403	-0.202821	-0.589701	-0.7394	-0.657211	0.17816
36	-0.168706	1.54172	2.09584	2.26567	1.84481	1.79917	0.813598	1.0895	1.64903	0.479425	3.93979	2.0448	2.52867	2.40135	2.40964	2.80907	2.39717	3.56884	36	-1.13715	-1.72259	-0.719391	-0.550255	-0.145473	-0.124982	-0.142846	0.190761	-0.836565	-0.113347	-0.218274	-0.238076	-0.516386	-0.872595	0.198953	-0.0017688	0.19724	0.193345	-0.873076	-1.26743	-0.717523	0.674919	1.09195	-0.0444466	-0.717478	-0.521546	-0.610805	-1.06441	-0.205691	-0.0449233
37	-0.211853	1.594	2.16272	1.47574	1.68533	1.51593	0.468823	1.08003	1.44994	0.540491	3.88263	2.75743	2.76314	2.88852	3.65821	2.52682	2.77812	2.91359	37	-0.679043	-1.44385	-1.13539	-0.572075	-0.0156501	-0.460193	-0.122692	0.0739705	-0.598999	-0.00339021	0.0717514	-0.188625	-0.256336	-0.538233	-0.0689897	-0.594125	-0.63772	0.233079	-0.930762	-0.684236	-0.0309098	0.987507	1.23821	-0.316858	0.0385621	-0.247688	0.00230324	-1.13676	0.0659026	-0.101806
38	0.782449	1.57688	1.6813	1.78937	1.47112	1.82384	0.384838	1.05738	-0.179306	0.652089	3.97808	2.25277	3.47098	2.41765	3.26551	2.71725	2.67931	3.1386	38	-0.72216	-1.31572	-0.729313	-0.470207	-0.530732	-0.394632	0.228948	0.0368674	-0.809316	-0.364727	-0.312973	-0.370794	-0.0773919	-0.854577	-0.251511	-0.176565	-0.607089	-0.151681	-0.557186	-0.77738	-0.743678	0.0799101	0.924761	-1.24799	-0.459846	-0.670914	0.278798	-0.911837	0.339953	0.258074
39	0.256348	2.33901	1.92275	1.92026	1.7022	2.32345	0.555611	1.65589	1.1764	0.404523	3.30421	1.82741	3.58	1.48024	3.21199	2.8899	2.06654	2.98158	39	-0.74724	-1.33591	-0.783301	-0.201603	-0.0837277	-0.0106046	-0.171968	0.261463	-0.614412	-0.0758298	-0.13693	-0.31583	-0.289796	-0.852354	-0.0395999	-0.198706	-0.465043	-0.130218	-0.928997	-0.129205	-1.07081	0.224405	1.07534	-0.510933	-0.40346	-0.334307	-0.679361	-0.567682	0.082048	-0.0792481
40	0.24904	1.37356	2.38118	2.04834	1.46959	2.19361	0.312001	1.33528	1.98758	-0.0648853	3.79786	1.75662	3.46054	1.94472	3.75882	1.97281	2.12039	2.79868	40	-0.584483	-1.61564	-0.993497	-0.483966	-0.0180893	-0.209645	-0.25246	-0.118166	-0.704214	0.228624	-0.555794	-0.455828	0.0436233	-0.586245	-0.29832	-0.324855	0.0378379	0.127319	-0.712162	-0.900861	-1.16155	0.228157	1.3838	-0.853431	-0.641652	-0.366164	0.0216235	-2.62174	-0.0278171	0.319101
41	-0.00448517	1.45871	2.53253	1.52831	1.35879	2.0788	0.890424	1.29325	0.971841	-0.206043	3.44595	2.09752	2.54021	1.27749	2.66916	2.13718	1.64011	2.62375	41	-0.502087	-1.31879	-0.694743	-0.379653	-0.522952	-0.128929	-0.321469	-0.201695	-0.915676	0.0312247	-0.19309	-0.511316	-0.0232142	-0.757423	-0.306257	-0.0202952	0.0679427	0.0569655	-0.346678	-0.366815	-0.722192	0.925146	0.624163	0.641428	-0.499013	-0.565452	-0.827206	-0.366237	-0.209773	0.57208
42	-0.246581	1.27068	1.99829	1.97827	1.92451	1.54971	0.138118	1.05817	1.45426	0.0772353	3.48158	2.11197	3.07543	0.725398	3.08132	2.01881	2.41468	2.70448	42	-0.507742	-1.36304	-0.669417	-0.167033	-0.777789	-0.412802	0.127888	0.0624975	-0.790792	0.12294	-0.236845	-0.337513	-0.00603154	-0.710298	-0.183687	-0.334223	-0.0595116	0.282856	0.285985	-0.543609	-1.16247	-0.295902	0.769377	-0.317747	-0.907161	-0.708524	-0.758998	-0.337392	-0.715201	-0.137935
43	-1.13177	1.84651	1.74118	1.7836	1.55403	2.0217	0.296648	1.19956	1.56396	0.793858	3.62199	1.75354	2.20614	2.54822	2.85073	2.1673	2.0819	2.76142	43	-0.370325	-1.32494	-0.489922	-0.346831	-0.665174	-0.927382	0.387554	0.217211	-0.824808	-0.0308925	-0.019433	-0.31486	0.303975	-0.417725	-0.0477454	-0.14342	-0.0945839	0.244205	-0.170617	-0.48525	-1.14424	0.654	0.225489	-0.224047	-1.07562	0.169654	-0.438131	-2.48799	-0.338623	-0.314682
44	-0.464388	1.30223	0.957847	1.7453	1.34958	2.05852	0.601358	1.30388	1.00857	-0.39765	4.1679	1.89269	3.15834	1.70376	3.10849	2.04537	1.88467	2.85807	44	-0.30228	-1.29322	-1.00987	-0.463153	-0.330116	-0.617949	0.676256	-0.113994	-0.946995	-0.106001	-0.393163	-0.418292	0.153624	-0.683986	-0.643264	-0.0128575	-0.397651	0.0924091	-1.603	-0.408118	-0.630284	0.707287	-0.244915	-0.721324	-0.28622	-0.392655	0.0922418	-1.49606	0.0611539	-1.39831
45	-0.5035	1.44581	1.32899	1.67727	1.35225	1.81693	-0.142775	1.5306	0.931516	-0.133261	3.99765	2.12806	2.67253	1.07145	2.96009	2.39235	2.09002	1.95487	45	-0.778345	-1.5083	-0.915593	-0.517541	-0.395117	-0.832522	0.356094	0.219515	-0.90769	0.00693671	-0.326505	-0.43623	-0.405966	-0.696372	-0.502519	0.353987	0.0167482	0.331921	-0.162003	-1.15548	-0.900296	0.295807	0.476441	-0.356811	-0.883501	-0.549095	-0.809304	-0.670818	-0.515837	0.135619
46	-0.968526	1.51568	1.45993	1.75676	1.48399	1.69497	0.533099	1.5488	1.05068	0.130189	3.25359	1.93053	2.6505	0.708485	3.01149	2.96072	1.82109	2.6121	46	-0.138999	-1.28096	-1.02651	-0.38361	-0.346703	-0.347018	0.47474	-0.062992	-0.803017	-0.121378	0.0378164	-0.522764	-0.14907	-0.948205	-0.399957	-0.0161174	0.106253	0.257525	-1.20903	-0.706386	-0.567255	-0.653794	1.3005	-0.510531	-1.22598	-0.642007	-0.446993	-1.03892	-0.322446	-0.138256
47	-0.461939	2.35671	1.50922	1.98762	1.52236	1.45642	-0.0226482	1.20946	1.09846	-0.202206	2.91958	1.82029	3.07161	1.81929	2.06524	1.98702	2.41184	2.37141	47	-0.480358	-1.41904	-0.586216	-0.0974822	-0.267947	-0.281927	0.366272	-0.0809285	-1.01775	-0.375695	-0.0137817	0.155757	-0.336183	-0.459045	-0.386667	-0.0848099	0.0476848	0.28797	-0.6153	-0.667507	-0.851571	-0.200284	0.901723	-0.684704	-0.421557	-0.259691	-0.3093	-0.550421	0.454955	0.223668
48	-0.548083	1.33	1.11646	1.6396	1.3179	1.67391	0.582097	1.23794	0.752787	-0.3839	3.50111	1.41636	2.80195	1.55491	3.32707	1.42278	2.30831	2.53317	48	0.130643	-1.24677	-0.94253	-0.471381	-0.127239	-0.295993	0.0454813	-0.150089	-0.878082	-0.459718	0.0319772	-0.0958714	-0.510692	-0.617261	-0.193931	-0.0342152	-0.294686	0.375053	-0.165715	-0.535796	-0.399876	0.470078	1.34826	-0.034655	-0.755269	-0.457124	-0.504502	-0.806826	-0.225989	0.508665
49	-2.10024	1.38058	1.11252	2.02448	1.59896	1.36296	0.832045	1.2423	0.991733	-0.129095	3.53466	1.66365	2.88347	0.99177	2.60104	2.0337	2.04731	1.79561	49	-0.511787	-1.40923	-0.49828	-0.488289	-0.778451	-0.529855	-0.0374923	0.045119	-0.941447	-0.0119512	-0.852338	-0.0800799	-0.0460517	-0.503943	-0.514089	0.413908	-0.41941	0.192197	-0.151375	-0.417563	-0.579247	1.68616	1.39952	-0.368446	-0.797022	-0.524542	-0.216144	-0.435762	0.291869	-0.0465607
50	-0.596639	1.52175	1.31384	1.93107	1.24163	1.1729	1.08436	1.86308	0.823393	-0.494923	3.16499	1.48446	2.688	0.753961	2.10844	1.93289	2.48898	2.15989	50	-0.0846044	-0.666883	-0.337154	-0.724632	-0.584128	-0.316128	-0.150187	-0.139054	-0.966393	-0.243737	-0.0277928	0.425293	0.00116413	-0.380306	-0.420457	0.170404	-0.78919	-0.0493983	-0.313754	-1.54064	-1.30792	0.489934	1.45316	0.460553	-1.13616	-0.364714	-0.585618	-0.628024	-0.334912	0.390726
51	-2.56941	1.47865	1.32119	1.84037	1.34551	1.57067	0.758194	1.0866	1.07039	0.146092	2.47938	2.10838	2.91594	1.72001	1.86035	1.93094	1.79806	1.73011	51	-0.523254	-0.922462	-0.359243	0.0985231	-0.44434	-0.844746	0.270089	-0.512902	-0.858616	-0.0651487	0.136317	-0.643006	-0.431394	-0.356514	-0.6368	-0.165177	-0.0294083	0.128751	-0.186847	-0.620592	-0.888048	0.106857	1.39086	-0.175917	-0.983337	-0.0196156	-0.209475	-0.183606	-1.39637	-0.787963
52	-0.582898	1.10889	-0.273865	1.61244	1.40525	1.32683	0.539772	1.21892	1.14048	0.0873833	3.69184	1.56477	1.81636	1.85254	1.74307	2.01409	2.04589	2.33869	52	-0.659071	-1.62299	-0.538061	-0.423681	-0.117807	-0.658902	-0.0200316	-0.237831	-0.791526	0.180287	-0.200352	0.168594	-0.204366	-0.383735	-0.2904	-0.0583131	0.0483085	0.235599	-0.835086	-0.791292	-0.60631	0.0715164	1.21876	0.453631	-0.829724	-0.653136	-0.552903	-1.55951	-0.0695653	-0.0918538
53	-0.707564	1.52784	1.43653	1.85234	1.26899	1.27655	0.751468	1.31934	1.12315	-0.348008	2.94666	1.60682	2.59512	2.09003	2.74466	2.34297	2.0554	2.22447	53	-0.304141	-1.29285	-0.480882	-0.461426	-0.240061	-0.595563	0.15512	-0.206197	-1.09524	-0.18013	-0.0876815	-0.331868	-0.208502	-0.478255	-0.342645	-0.31443	0.345759	0.335598	-0.642216	-0.669774	-0.947023	0.222558	1.23879	-0.668647	-0.852948	-0.352819	-0.0809131	-0.638126	-0.960946	0.167242
54	-0.259428	0.306485	1.76281	0.785931	1.39113	1.3203	-0.20102	1.49806	1.17762	0.620028	2.22811	1.69026	2.35075	0.955566	1.67516	2.44197	1.76301	1.887	54	-0.750742	-0.951842	-0.649013	-0.328285	-0.440159	-0.461699	0.207155	-0.0930987	-0.971388	-0.298781	0.0669127	-0.0717393	-0.0135562	-0.00979133	-0.224775	-0.0554838	-0.161991	0.302289	-0.546961	-1.33028	-1.25235	0.136332	0.880339	-0.619114	-0.779729	-0.26214	0.856882	-1.19579	-0.569521	0.407122
55	-0.970464	1.3075	1.6819	1.79296	0.987576	1.28559	-0.458925	1.02219	1.21081	-0.19937	2.38595	1.62678	2.00491	1.37086	3.87023	1.7107	1.3435	1.76618	55	-0.630703	-1.35082	-0.702426	-0.307254	-0.478135	-0.974906	0.135312	-0.0738087	-1.2652	-0.226409	-0.0465396	-0.249803	-0.634835	-0.541196	-0.319007	-0.0587231	0.286443	0.126755	0.144427	-0.12475	-1.1024	0.553938	0.753634	-0.85919	-0.624306	-0.813361	-0.287317	-0.793688	-0.21927	0.469895
56	-0.217928	1.18319	1.65473	1.49408	1.08154	1.29781	0.440971	1.13887	1.16655	0.0891407	2.51398	2.066	1.57558	0.831785	1.85496	1.82376	2.00989	2.15464	56	-0.554951	-1.08845	-0.71852	-0.252168	-0.24167	-0.254457	0.443811	0.0517182	-0.80725	-0.256271	-0.393105	-0.205225	-0.350325	-0.465465	-0.235609	0.0531618	0.475735	-0.0123899	-0.558429	-0.577598	-1.16727	0.89201	0.54317	0.232507	-0.546374	-0.665052	-0.261348	-0.430708	-0.00376968	0.365064
57	0.0149898	0.951584	1.515	1.36957	0.717485	1.16461	0.656327	1.30547	1.13743	-0.0422304	2.58902	1.68614	0.452293	0.534008	1.56398	1.87483	1.57556	1.46463	57	-0.597812	-1.41244	-1.08084	-0.145708	-0.146877	-0.347515	0.626871	-0.195469	-0.310817	0.122904	-0.165313	-0.386166	0.206977	-0.511544	-0.214262	-0.195269	0.204101	0.434412	-0.289303	-1.0923	-1.17233	0.263	0.831497	-0.691717	-0.857836	-0.290978	-0.918052	-1.04818	-0.147044	0.146683
58	-1.60173	1.48126	0.592785	1.42899	1.34714	1.03006	0.528318	1.69007	0.901113	-0.185936	2.89921	2.11655	2.27897	0.983563	2.38505	1.96826	2.16679	1.97693	58	-0.543324	-1.37403	-0.813974	-0.0745572	-0.582748	-0.50548	0.294445	0.118156	-0.195782	0.182349	0.0381844	-0.257487	-0.317833	-0.237473	-0.446022	-0.0545226	-0.087153	0.10771	0.390549	-0.386478	-0.828659	0.204102	1.46098	-1.18323	-0.339104	-0.322758	-0.295075	-0.626368	0.0673663	0.581791
59	-2.03926	1.31735	-0.442748	1.48574	0.922505	1.38213	0.56974	1.33075	1.15391	0.996218	1.84395	1.68804	2.06893	1.51869	1.21764	2.73877	1.69823	1.77036	59	-0.627934	-1.5164	-0.767817	-0.407404	0.00304752	-0.437686	0.552298	0.122114	-0.420598	0.16549	-0.357299	-0.0133233	0.0530709	-0.311506	-0.430468	-0.00657484	-0.0236269	-0.0877018	0.690027	-0.0829096	-0.235021	-0.112336	1.2025	-0.58518	-0.166297	0.226601	-0.121109	-1.28395	-0.707358	0.0729016
60	-2.20674	0.883382	1.13875	1.23768	0.993691	1.06888	0.228462	1.414	0.993603	-0.387091	2.59047	1.47979	2.64051	1.25401	2.13809	2.30302	1.78786	1.24878	60	-0.421828	-1.3428	-0.595646	-0.000716872	-0.0100447	-0.0132772	0.107629	-0.494975	-0.762471	0.137292	-0.205381	-0.437103	0.0270481	-0.790186	-0.34823	0.188652	0.154236	0.197968	-0.688005	0.112983	-1.07613	0.280827	0.276889	-0.327986	-0.580302	-0.167161	-0.777547	-1.89819	-0.641167	0.816061
61	-0.55477	0.758773	1.04345	1.63244	1.29963	0.803453	0.495002	1.22712	0.731311	0.126535	2.4543	1.57502	1.85977	1.29831	1.99674	2.58816	1.41203	1.25477	61	-0.289778	-1.30536	-0.588631	-0.513265	0.0827882	-0.171685	0.212415	-0.705093	-1.05801	0.0683625	-0.121967	-0.336649	-0.78076	-0.314802	0.335203	-0.152876	-0.296943	0.161481	-0.251338	-0.79255	-1.31643	1.20891	0.444312	-0.753212	-0.786463	-0.710781	-0.0722026	-1.13748	-0.479663	0.374459
62	-0.603533	1.33941	1.18199	1.08814	0.885161	1.30511	0.7144	0.939934	0.456205	0.0709743	2.5957	1.83105	1.95735	1.47203	2.38097	1.6092	1.57588	1.94249	62	-0.378816	-1.03342	-0.974213	-0.628583	-0.290707	-0.0514619	0.300919	-0.170784	-0.607211	-0.303136	-0.130938	-0.492387	-0.758534	-0.383969	-0.237125	0.626055	0.0254093	0.364012	-0.790986	-1.76282	-1.36001	0.0995266	1.08285	-1.05287	-0.357812	-1.12655	-0.245482	-0.989836	-0.367145	0.525336
63	-0.539131	1.08607	1.52406	1.3206	0.832342	1.19934	0.177294	0.529549	0.542577	-0.204358	2.32798	1.32647	1.70193	0.930078	1.90971	1.77981	1.00425	1.81867	63	-0.484515	-1.1086	-0.798139	0.0792617	-0.405527	-0.513324	0.166738	-0.58439	-0.41658	0.0838875	-0.151871	-0.368305	0.191033	-0.911189	0.0276681	-0.576736	0.257658	-0.0342759	-0.802594	-0.424492	-1.00225	0.00343435	0.850161	0.151116	-0.520661	-0.147201	0.018632	-0.529101	-0.458664	-0.491413
64	-0.605307	0.974903	1.77587	1.39793	1.11529	0.995999	0.496806	1.19731	1.14015	-0.347082	2.77594	1.72881	2.00109	-0.299947	0.77186	2.02431	1.9603	1.22075	64	-0.292339	-1.12736	-0.204596	-0.332745	-0.407389	-0.803545	0.437815	-0.0527765	-0.320621	-0.111466	-0.171107	-0.400213	-0.459659	-0.300527	0.0985171	-0.00195587	0.241451	-0.0667649	-0.200072	-0.468533	-0.25895	0.540448	1.75618	-0.516058	-0.883735	-0.35938	0.401485	-0.725434	-0.804633	0.118144
65	-1.70308	0.5753	2.67151	1.3642	1.04894	1.04435	0.0568911	1.03606	0.461495	-0.358666	1.3558	1.41065	1.94077	1.17002	2.05647	1.83462	1.38317	1.26865	65	-0.4026	-1.19575	-0.438551	-0.0279222	-0.339971	-0.374552	-0.205622	0.0980759	-0.462273	0.0828252	-0.0901643	-0.374491	-0.531284	-0.84239	-0.272023	-0.00138003	-0.0232488	-0.0231843	-0.341176	-0.326098	-0.286037	-0.027128	0.501178	-0.663362	-0.559844	-0.237333	0.290435	-0.138644	-0.439128	0.19074
66	-1.22323	1.0062	2.14329	1.18781	0.841203	1.15946	0.0928323	1.18883	1.04898	0.858893	2.94973	1.30785	2.31409	0.97314	2.19433	1.69423	1.97544	1.46946	66	-0.128341	-1.26268	-0.0551405	0.0578134	-0.760607	-0.249444	0.0965908	0.132861	-0.20164	-0.132419	-0.0452441	-0.239977	-0.226224	-0.496103	0.129504	-0.432153	0.162799	0.449216	-0.909948	-0.256078	-0.492053	-0.220174	1.09079	-0.486206	-0.280635	-0.443621	-0.0849969	-0.86201	-0.056882	0.0796797
67	-0.401614	0.650465	1.35617	0.858989	0.944656	0.860315	-0.96944	0.960204	1.49609	-0.871446	1.5584	1.27201	0.185606	1.25307	2.87473	1.9899	1.58128	1.48877	67	-0.597091	-1.20864	-0.346402	-0.169053	0.107505	-0.420742	0.0825897	-0.110375	-0.732433	-0.0235935	-0.0101395	0.0832441	-0.222715	0.0325239	-0.213202	-0.197613	-0.0515083	-0.341565	-0.573702	-0.0878489	-0.947799	-0.000878194	0.170431	-0.576886	-1.18441	0.220638	-0.567279	-1.96967	-0.694364	-0.168849
68	-0.309422	0.331335	2.0064	1.06058	1.29679	1.01268	-0.326562	1.10921	1.0962	-0.562122	1.76261	1.73814	2.60323	0.523456	1.91615	1.91877	1.41043	1.43082	68	-0.562005	-1.27353	-0.522185	-0.0873944	-0.312052	-0.363115	0.0444303	-0.209848	-0.541774	-0.424974	0.0147101	0.432661	-0.555092	-0.630061	-0.14626	-0.287301	-0.0991367	-0.0161264	-0.43632	-1.46537	-0.366902	1.16311	1.0198	-0.778128	-0.528789	-0.281478	-0.247416	-0.817612	-0.446329	0.176432
69	-2.39512	0.709984	1.54426	1.28677	1.20182	1.01574	0.0598885	0.789863	0.574225	0.0241882	1.56578	1.34064	1.57876	0.617226	1.89829	1.78075	2.49446	1.09602	69	-0.289648	-1.2531	-0.655346	-0.178152	-0.586621	-0.002863	-0.107791	-0.292049	-0.640888	-0.196025	-0.172719	0.109744	-0.236667	-0.495651	-0.0383886	0.321982	0.0472367	-0.000162211	-0.854006	-0.796716	-0.346782	1.11038	0.480275	-0.840263	-0.768064	-0.232888	-0.60148	-0.0730747	-0.607961	0.355425
70	-1.14286	0.450493	1.436	1.275	1.1775	0.961824	-0.0583299	0.680957	0.88462	-0.688526	2.43493	1.2581	2.07951	1.08027	1.29194	1.87982	2.06343	1.50957	70	-0.233334	-1.31678	-0.642529	-0.152769	0.114121	-0.270438	-0.242308	-0.0288202	-0.793208	-0.195477	0.0694969	-0.256456	-0.201445	-0.499709	0.468069	-0.355107	0.105711	-0.0488148	-0.624049	-0.420751	-0.343818	-0.427316	0.760686	-0.949637	-0.987322	0.296312	-1.15437	-1.91382	-0.418009	0.513405
71	-1.17389	1.13211	1.34463	0.668564	0.870971	0.73768	-0.186712	1.13825	1.07273	-0.882748	2.47877	1.1331	1.77471	0.99538	3.24665	1.57286	1.9404	1.12497	71	-0.655533	-1.44384	-0.609398	-0.278697	-0.751421	-0.0655551	0.252738	-0.0318478	-0.612561	-0.0312942	0.0251981	0.245679	-0.371691	-0.644014	-0.110711	-0.0257864	0.00635283	0.118677	0.451661	-0.182581	-1.04991	0.289936	0.472258	0.0172604	-0.750252	0.24323	-0.166542	-0.304221	-0.548126	0.678759
72	-1.19728	1.22883	0.618174	1.52838	1.35466	0.833182	0.105956	1.1091	0.568603	-1.30231	1.72456	1.68519	1.81801	0.295095	1.70951	1.9681	1.20585	1.49865	72	-0.566336	-1.69328	-0.497856	-0.09537	0.0133471	-0.034779	-0.263906	0.0978913	-0.520164	-0.311238	-0.31949	-0.256948	-0.184442	-0.540055	-0.240149	0.125703	0.157066	-0.00292367	-0.159985	-0.97316	0.0865562	0.584041	0.831798	0.299241	-1.00851	-0.457322	0.280343	0.192564	-0.167893	-1.21138
73	-1.35797	0.748175	1.13488	1.51664	1.31078	0.538228	-0.0958447	0.870299	0.613322	0.154252	2.2913	1.0648	2.0584	0.943613	1.36636	1.03895	1.08401	1.764	73	-0.488292	-1.41088	0.274853	-0.0160606	-0.159844	-0.074444	-0.362518	-0.338691	-0.890363	-0.273604	0.036369	-0.0232611	0.0192758	-0.824342	-0.476598	-0.424382	0.0792425	0.169765	-1.11066	-0.304577	-0.670406	0.773526	-0.480619	-0.634138	0.315046	-0.6213	-0.114286	-0.974444	-0.516618	0.15846
74	-0.828697	1.3174	0.731008	1.2196	0.667013	0.440677	0.246574	1.02547	0.931696	-0.552899	2.54027	1.72346	1.3158	1.17309	0.945118	2.0784	1.85013	0.917918	74	0.000247079	-1.63297	0.340552	-0.12908	-0.0957199	-0.379589	0.0100087	0.667103	-0.799247	-0.321718	-0.313282	-0.251591	-0.223207	-0.397218	0.148702	0.169238	0.101905	0.291092	0.0579932	-0.282676	-1.25686	0.665625	0.171884	-0.46642	-0.405042	0.201987	-0.346696	-0.175217	-0.159561	0.668439
75	-1.08398	1.36648	1.44264	0.626548	0.815834	0.869127	-0.0456092	0.823973	1.11455	-1.09254	1.88552	0.918982	1.07509	0.519912	1.80596	1.50365	1.64508	0.86305	75	-0.788655	-1.60746	0.103748	-0.278805	-0.210625	-0.181677	0.0333677	0.447721	-1.19535	-0.201489	-0.259984	0.0782972	0.274735	-0.143152	-0.549868	0.00328476	0.111275	0.203698	-0.202844	-1.18485	-0.432437	0.551819	0.479344	-0.866125	-0.397288	0.302168	-0.22911	-0.381013	-0.277335	0.2098
76	-1.33981	1.20099	1.41502	0.781608	0.97062	1.08897	0.25362	1.13004	1.25669	-1.05185	2.00277	1.67354	1.37505	0.559929	2.09756	1.30626	1.58748	1.15087	76	-0.439752	-1.19203	0.285739	-0.700126	-0.388092	-0.211733	0.312612	0.264316	-0.960038	-0.362562	0.0403615	-0.305883	0.170572	-0.121955	-0.280111	-0.0194525	0.195505	0.0462642	0.141294	-0.942569	-0.600712	0.268758	-0.414755	0.115058	-0.524405	-0.837326	0.103591	-0.412044	-0.0339135	0.133282
77	-2.46662	0.645175	1.31217	1.76404	1.20364	1.04932	0.0889467	1.02762	0.879519	-0.704505	2.46734	1.73751	2.23125	1.05583	2.19764	1.45423	1.57627	0.760698	77	-0.399561	-1.50538	0.0901983	-0.0895925	-0.215625	-1.6202	-0.27305	0.147571	-1.2496	-0.308547	-0.531019	-0.0421055	-0.130565	0.113359	0.0632484	-0.60662	0.00213695	-0.163767	-0.609491	-0.840776	-0.610886	-0.670195	0.933541	-0.6093	-0.765691	-0.253192	-0.128112	-0.237399	-0.211435	0.600274
78	-2.18411	1.24715	1.68183	0.937028	0.834474	0.79399	0.555743	1.09679	1.12283	-0.306007	2.03037	1.36111	1.09121	0.524501	2.04612	2.22318	0.971704	0.949405	78	-0.534363	-1.28642	-0.0950065	-0.563763	-0.412237	-0.283546	-0.273816	0.395845	-0.926987	-0.289597	-0.0420053	0.411588	-0.329006	-0.32469	0.0135377	-0.378754	-0.155265	-0.293805	-0.334831	-0.200891	-1.16003	0.943324	0.591613	-0.855366	-0.814291	-0.614058	-0.0616317	-0.781791	-0.871901	0.259714
79	-1.00945	1.38741	1.14257	1.26241	0.792403	0.735031	0.511793	1.10651	1.27234	-0.532792	1.91004	1.70647	0.866209	0.0625174	1.71706	1.47166	1.63929	1.38514	79	-0.577539	-1.387	-0.312913	-0.299852	-0.511161	-0.244612	0.0807208	0.114354	-1.04505	-0.0925256	-0.0429179	-0.14306	-0.135518	-0.481608	0.233855	0.287887	-0.435771	-0.126566	-0.426027	-1.08074	-0.862069	0.444062	0.608634	-0.950974	-0.547362	-0.809447	0.214611	-1.0338	-0.922701	-0.721753
80	-1.04984	1.33356	0.861121	0.759853	0.727447	0.977308	0.791762	1.1231	0.898301	-0.916486	1.29576	1.99893	1.56801	0.681945	2.51487	0.722955	1.6478	1.54153	80	0.00801672	-1.67063	-0.212398	-0.174562	0.0630203	-0.173275	0.122698	0.0914629	-0.965925	0.00646977	-0.372797	-0.146491	0.18054	-0.146234	-0.260124	-0.616804	0.0350693	-0.164876	0.492163	-0.819422	-0.785421	-0.273605	0.770799	-0.539455	-0.700322	-0.608123	0.211609	-1.38242	-0.327012	-0.12692
81	-0.53113	1.36674	0.860269	1.06709	0.94597	0.858241	0.303707	1.10847	0.796562	-0.426546	1.80077	2.01469	2.07289	1.16189	2.00184	1.03391	0.728751	0.955984	81	-0.665284	-1.44746	-0.336278	-0.51702	-0.0662894	-0.870755	-0.303431	-0.0849696	-1.26817	-0.191563	-0.0890928	-0.180344	-0.121258	-0.36335	-0.0718005	-0.371471	0.00498119	-0.471674	-0.729496	-1.09887	-0.893604	-0.00243132	1.14823	0.12113	-0.404021	-1.08737	0.322035	-0.461427	-0.822039	0.0465709
82	-2.11066	1.36947	0.915564	1.05164	0.833359	0.54605	0.397184	0.89988	1.50841	-0.290207	1.85635	0.991275	1.22566	0.96652	2.40405	2.09029	1.27852	1.02246	82	-0.247505	-1.22721	-0.358378	-0.20078	-0.19935	-0.636147	-0.240321	-0.106663	-1.18532	-0.708788	-0.0906245	-0.0738453	0.0388383	-0.144384	-0.447817	0.0971383	0.294742	0.0991652	0.0644524	-0.876756	-0.499728	-0.139206	0.228713	-0.0963554	-0.718645	-0.604373	-0.514049	-0.341461	0.153659	0.144034
83	-0.656475	1.73201	0.956861	1.03793	1.06183	0.892069	-0.34334	0.824006	2.19993	-0.0104551	2.05645	1.62855	1.41444	-0.779636	1.58146	1.50556	1.63642	1.2224	83	-0.313903	-1.03702	-0.0768282	-0.480917	-0.332546	-0.200043	-0.217888	0.285186	-1.00122	-0.362381	-0.00372091	0.0379416	0.0753979	-0.224668	-0.364924	-0.198832	-0.441657	-0.154261	-0.494249	-1.03268	-0.89122	0.316112	1.38627	-0.649894	-0.0823121	-0.787405	0.267189	-1.50623	-0.47474	-0.0121433
84	-2.11846	0.696758	0.852534	1.40524	0.884435	0.664772	0.281321	0.885263	1.85527	-0.307689	1.30148	1.63323	1.95227	0.166974	1.81951	1.49998	1.66701	1.20337	84	-0.142752	-1.35778	-0.330607	-0.270041	-0.31192	-0.488293	-0.0860584	-0.619599	-0.896837	0.131116	-0.0535916	-0.111892	-0.0818351	-0.812447	-0.231574	0.114979	-0.0140881	0.344627	-0.60972	-0.880749	-0.168675	0.028033	0.933231	-0.634001	-0.472568	-0.190851	0.168078	-0.903108	-0.584641	-0.21745
85	-2.1329	0.670095	1.00807	1.10182	1.01306	0.753072	0.0411189	1.2629	1.29047	-0.0961748	1.4464	2.38143	3.0246	0.876447	1.67805	1.65939	1.33311	1.32426	85	-0.245755	-0.475818	-0.470219	-0.0809944	-0.471045	-0.414921	-0.235119	-0.668642	-1.15612	-0.140628	-0.511678	-0.15399	0.0739749	-0.140574	-0.394093	0.616968	-0.304284	-0.350926	0.126657	-1.08793	-0.236456	-0.11646	1.64472	-1.54689	-0.881234	0.42962	0.0275396	-0.0333789	-0.381867	0.109057
86	-1.97051	0.705934	0.895315	1.1843	0.979776	0.580983	0.50916	0.999866	1.69559	-0.941363	1.05205	1.78485	2.2709	1.41865	2.11246	1.42466	1.54871	0.977338	86	-0.336934	0.00555129	-0.380913	0.2171	-0.354667	-0.428608	-0.340938	-0.449834	-0.693688	-0.189465	-0.0815383	-0.120565	-0.340009	-0.333083	-0.160197	-0.0423696	-0.332205	-0.43335	0.481234	-0.146899	-0.921734	0.0817903	0.746628	-1.04036	-0.548636	-0.446742	-0.773473	-0.673192	-0.784635	-0.582997
87	-1.06623	-0.0534945	1.40564	1.06311	1.14528	0.757167	0.229877	0.566336	1.76422	-1.1167	1.5402	1.39555	1.15894	0.533178	1.45799	2.19476	1.57937	1.13076	87	-0.365549	-0.664108	-0.169454	-0.370582	-0.335644	-0.650423	-0.153107	-0.191625	-1.17109	-0.398142	-0.0268075	-0.38896	0.0226522	-0.317794	-0.409127	0.106604	-0.526855	0.0795069	-0.209814	-0.23456	-0.303651	-0.0481565	0.918248	-0.200859	-0.187134	-0.282403	0.213121	-0.209754	-0.0804031	0.125152
88	-0.644529	0.306811	0.648691	0.644842	0.733447	0.567175	0.101525	0.706177	1.45244	-0.342453	2.02512	1.80707	1.3535	0.563584	0.735525	2.14977	1.60788	0.922433	88	-0.0230044	-0.634811	-0.160236	0.143841	-0.76733	-0.434442	0.33883	0.150731	-1.46921	-0.171361	-0.0366969	-0.31589	-0.174951	-0.179048	-0.150816	-0.00163777	-0.507343	0.368254	0.153676	-0.0458545	-1.0696	0.0700978	1.29644	-0.962877	-0.878117	0.261185	-0.452325	-0.207345	0.00594332	-0.591695
89	-0.786102	0.184651	0.569973	0.868123	0.898115	0.5689	0.353181	1.05637	1.16718	-0.921291	1.34353	1.98463	1.76558	1.40072	1.40625	1.7533	0.981556	1.21728	89	0.232283	-0.715438	-0.116522	-0.267415	-0.51777	-0.020733	0.0214862	-0.267485	-0.930932	-0.297996	-0.420193	0.0326099	-0.110049	0.267568	-0.326424	0.00236793	-0.521142	-0.100647	-0.0928676	-0.207465	-0.564794	-0.348901	1.3559	-0.636256	0.141061	-0.167662	0.383946	-1.02035	-0.299139	0.420381
90	-2.26774	0.417419	0.836602	0.969332	1.01454	0.784851	0.772426	1.14743	1.8514	-0.36931	1.48643	1.0172	2.44796	0.469564	1.32425	1.78909	1.83718	1.42161	90	-0.224654	-1.24716	-0.472185	-0.185588	-0.573066	-0.362266	-0.142932	0.174812	-0.799636	-0.114028	-0.460273	-0.0466417	-0.105111	-0.724538	-0.402544	0.263042	-0.545113	-0.34865	-0.370607	-0.814253	-1.80367	0.301147	0.121458	-0.594315	-0.828831	0.0691284	0.0956551	-0.889976	-0.275416	0.612596
91	-2.45584	1.65679	0.982083	0.985018	0.75402	0.727664	0.0147964	0.21208	1.68401	-0.765593	1.47186	1.45804	1.76494	0.95926	1.53163	1.43773	1.01266	1.30412	91	-0.345753	-0.865837	-0.175413	0.346857	-0.258226	0.102017	0.0188435	-0.186386	-1.05825	0.0208874	-0.327377	-0.167858	0.119959	0.00770765	-0.319036	0.41373	-0.142334	0.0273612	0.234108	-0.795131	-0.478932	-0.0764939	0.335346	0.0446087	-1.43484	0.242144	0.0100233	-0.351793	-0.652026	0.884347
92	-1.0703	1.40767	0.199415	0.96816	1.22584	0.729275	-0.0689795	0.689854	1.21241	-1.31268	1.10191	1.61907	0.889658	0.407888	1.21037	1.25591	1.34497	1.03994	92	-0.419006	-1.09434	-0.19862	-0.562948	-0.563148	-0.659987	-0.0905056	-0.161327	-0.840995	0.279345	-0.301154	-0.189591	0.315866	0.230218	-0.261058	0.107638	-0.0904545	0.286165	0.0663101	-1.27662	-0.615955	0.0100717	1.11967	-0.447501	-0.531301	-0.482651	0.0284544	-0.98588	-0.174011	-0.0943008
93	-0.434699	0.778973	0.469656	0.828047	0.959711	0.202975	0.449969	1.34761	1.32776	-0.234757	0.419426	1.56385	1.63366	-0.0657322	0.526902	1.8118	1.1145	0.388853	93	0.212774	-0.981328	-0.174361	-0.279136	-0.597554	-1.04364	-0.0870559	-0.344335	-1.24881	0.194774	0.072134	-0.258201	0.0510065	-0.0217437	-0.529817	0.244706	-0.0933128	0.185421	0.505328	-0.766452	-0.748261	0.220512	1.2878	-0.683204	-0.640342	-1.00347	-0.274891	-0.135182	-0.651063	-0.039062
94	-1.61555	0.816971	1.13727	0.626267	1.0924	0.590876	0.346007	0.558861	1.24819	-0.527893	1.38019	1.45284	1.16982	-0.628545	1.63598	1.02472	1.74699	0.281243	94	-0.118995	-1.173	-0.435358	-0.12268	-0.451778	-0.206368	-0.0333811	0.183835	-0.670378	0.0205836	-0.718549	-0.241357	-0.018256	0.432019	-0.245816	0.151961	0.176493	-0.114693	-1.16298	-0.825597	-1.3255	-0.142649	1.89612	-0.52362	-0.374221	-0.364602	-0.763452	-0.797487	-0.780341	-0.0646644
95	-0.707557	1.80653	0.834944	0.686259	0.949595	0.663803	0.266825	0.893122	1.37539	-0.640473	1.60641	2.40735	2.16396	0.714161	1.91609	1.56457	1.3575	1.59295	95	-0.309698	-0.702148	-0.245825	-0.0943363	-0.534845	-0.506987	0.295734	-0.00449245	-0.49261	-0.110753	-0.567215	-0.217866	-0.065853	-0.73081	-0.0123451	0.00436277	-0.0573054	0.167389	-0.804837	-0.469354	-0.936618	-0.189766	1.55188	-0.425898	-0.425606	-0.111547	0.146399	-0.801334	-0.760488	0.434727
96	-0.85729	1.90031	0.875932	0.97324	0.581844	0.659637	0.15264	0.879847	1.03218	-0.552247	1.30381	1.97724	0.876825	-0.00128274	1.14994	1.95074	0.79668	0.872246	96	-0.322254	-1.12971	-0.0552325	-0.0895214	-0.400831	-0.468964	-0.0191568	-0.320866	-0.623313	0.151999	-0.0302623	-0.0591364	-0.184839	-0.214015	-0.310409	0.21828	-0.19162	-0.125523	0.244847	-1.34564	-0.457515	0.889603	1.25119	-1.23197	-0.267715	-0.453646	-1.49206	-0.457282	0.158433	0.948485
97	-0.981172	1.95064	0.276209	0.762938	0.76518	0.733232	0.40845	0.766136	0.873389	-1.18511	1.19648	1.29357	1.84297	0.4539	0.419817	1.29432	1.00792	1.12395	97	-0.420719	-1.23615	-0.197212	-0.00708862	-0.208925	-0.284988	0.499156	-0.256062	-0.36194	-0.267819	0.414281	-0.178794	0.118211	-0.469433	0.0791433	0.441536	0.300104	-0.17251	-0.351637	-0.250931	-0.466961	-0.0799684	0.222816	0.609543	-0.697079	-0.32698	0.0775618	0.110121	-0.977463	0.480897
98	-0.69038	1.35917	0.212961	0.919073	1.10554	0.298568	0.342928	0.798504	1.13682	-0.419902	0.950694	1.6385	0.789344	-0.0861309	1.33966	0.781784	1.45138	0.52187	98	0.154762	-1.17514	-0.385177	-0.586869	-0.538148	-0.140995	0.629173	0.0295495	-0.380859	-0.406175	0.412011	0.0215496	0.210488	-0.292728	-0.0166973	0.174545	-0.271113	0.00203183	-0.594651	-0.449311	0.159407	-0.895577	0.413613	-0.971188	-0.757195	-0.164872	0.601818	-0.0579353	-0.675264	0.1687
99	-0.837329	1.87996	-0.393802	0.998787	0.865913	0.549222	0.482412	0.613269	1.25024	-1.01748	1.50034	1.6288	0.913649	-0.0318545	0.427986	1.87298	1.3658	1.20531	99	-0.308499	-1.23659	-1.32481	-0.471005	-0.185624	-0.0894793	0.578042	0.0259619	-0.779848	-0.0396099	0.119801	-0.034148	0.00775583	-0.32407	0.0351033	0.256151	-0.491222	0.344448	0.118601	-0.30951	-0.568873	0.0174575	1.10027	-0.767791	0.206247	-0.402677	0.157822	-0.151809	-0.452778	0.28091
100	-1.31221	0.959711	0.693169	0.899224	0.935855	0.564341	0.519137	0.375626	0.641958	-1.3329	1.29236	1.59811	1.66863	-0.209472	1.10166	1.01557	1.22334	1.6287	100	-0.713116	-1.69436	-1.17014	-0.546993	-0.702689	-0.734364	0.237836	-0.0166686	-0.740013	-0.141794	0.229296	-0.364905	0.383612	-0.221601	-0.409976	0.103216	-0.65832	0.257975	-0.378098	-1.11007	0.216108	-0.0531347	0.934229	-0.840904	-0.334875	0.173739	-0.155985	-0.885226	-0.927325	0.221208
101	-0.194143	1.06843	0.800803	0.698857	0.669523	0.741999	0.482241	0.74555	0.888417	-0.938799	1.6518	1.51502	0.987988	0.0106405	1.32294	1.45127	0.761533	0.546234	101	-0.362964	-2.03569	-1.04566	-0.209967	-0.695817	-0.363469	0.0423724	-0.291454	-1.01968	0.0192815	0.160259	0.0030691	-0.0536425	-0.507349	0.244002	-0.377427	-0.373463	-0.0333156	-0.369096	-1.04082	-1.28807	-0.680707	1.11889	-0.639939	-0.3878	0.0456599	0.415771	-0.120681	-0.344278	0.614277
102	-2.24158	-0.0987607	0.396419	1.20883	0.556688	0.49116	-0.303836	0.53675	1.07746	-1.27614	0.529771	1.3902	0.834541	-0.146308	0.645277	1.13787	1.24416	0.392496	102	-0.487283	-2.0329	-0.796834	0.0844543	-0.594432	-0.479339	-0.284278	-0.187613	-0.811438	-0.0299231	0.0063757	-0.168749	0.301903	-0.322018	-0.155723	0.50363	-0.036221	0.0681781	0.690592	-0.605618	-0.350623	0.166862	0.814762	-0.922743	-0.436156	-0.132745	-0.3595	0.271703	0.144006	0.42389
103	-1.12558	1.21328	0.363267	0.856568	0.675896	0.32609	0.476477	0.860965	0.803777	-0.595993	1.28937	1.26031	1.38671	-0.634726	1.51082	1.64225	1.10401	1.37336	103	-0.349907	-1.77136	-0.320744	-0.322433	-0.252403	-0.487693	0.166533	-0.130856	-0.539466	-0.0838037	-0.112534	0.0912589	-0.0690916	-0.597725	-0.432785	0.443208	-0.774867	-0.153205	-0.676801	-0.361845	-0.150781	0.530102	0.723768	-0.737289	0.0333905	-0.750769	-0.674146	-0.154144	-0.576591	0.201656
104	-1.98209	0.0608618	1.5104	0.744061	0.96824	0.750697	-0.625085	0.887084	0.986835	-0.498215	0.856597	1.9353	1.33443	-0.881783	1.23479	1.98297	1.45202	0.899923	104	-0.266817	-1.57693	-0.765189	-0.452117	-0.902757	-0.640992	0.0237752	-0.280804	-0.708085	-0.262786	-0.161066	-0.236405	0.357416	-0.15143	-0.0703078	0.307875	0.0487109	-0.0991992	-0.346517	-1.30184	-0.671417	-0.181685	0.79738	-1.21878	-0.321745	-0.33246	0.442234	0.0357033	-0.691669	0.0221511
105	-1.06041	0.486118	1.01057	1.21037	0.55694	0.167532	0.220496	-0.0773472	1.0314	-0.805926	0.865671	1.83267	0.77751	1.66682	1.48551	1.57889	0.724865	0.660469	105	-0.208269	-1.18405	-0.39907	-0.406935	-0.321006	-0.261913	0.0901466	0.0734209	-0.735955	-0.107447	-0.0645418	0.107423	-0.0676968	-0.157042	-0.0703489	-0.0581096	-0.0864703	0.316127	-0.525126	-1.50466	-0.967618	-0.153516	0.874427	-0.675275	-0.492871	0.0467281	0.365127	-0.566392	-0.998704	-0.16266
106	-1.4833	1.03293	0.879975	0.457311	0.833844	0.573959	0.594553	0.319045	0.733456	-1.04591	0.875126	1.82106	1.72779	0.357788	1.86049	1.44844	0.763387	1.10962	106	-0.102166	-1.43358	-0.311082	0.110712	-0.440724	-0.338981	0.219917	-0.109444	-0.970852	-0.286228	0.507949	-0.335404	-0.25321	-0.280412	-0.338459	0.296128	0.0562254	0.16633	-0.640265	-0.938249	-0.373717	0.107664	0.844654	-0.656855	-0.628858	-0.672432	-0.353914	0.142991	-0.590479	0.372321
107	-0.972606	0.707206	0.660441	0.95211	0.0876573	0.193214	-0.00899146	0.695023	0.156807	-0.51873	1.2162	1.603	0.537435	-0.396705	1.55068	1.66966	1.20913	0.974304	107	-0.253797	-0.747408	0.235984	-0.3409	-0.486914	-0.412653	0.100442	-0.153533	-0.766094	-0.180801	0.0162868	-0.303793	0.770028	-0.596867	0.639292	-0.115732	-0.190327	0.0848455	-0.616722	-0.505387	-0.0537038	0.579283	1.24745	-1.31202	-0.284065	0.238032	0.0248511	-0.0148071	0.00769045	0.0581916
108	-2.56311	1.19783	1.48638	0.773842	0.248746	0.36689	0.485939	0.550085	0.303503	0.28521	1.46628	1.68832	1.25028	-0.0187291	1.34718	1.18651	0.783053	1.12567	108	-0.529728	-1.03617	0.303253	-0.477801	-0.481268	-0.395524	0.243975	0.0480423	-0.493535	0.115899	0.128478	-0.193099	0.592752	0.144621	0.0211617	-0.308626	-0.55724	0.185141	0.326194	-0.801778	-1.48507	-0.297571	0.860012	-0.788773	-0.677091	-0.390414	-0.347716	0.160493	-0.931622	-0.0370129
109	-1.17227	1.03786	1.82529	0.902744	0.896629	-0.300086	0.650657	0.622545	-0.136524	-0.975297	0.844277	0.954981	1.40254	-0.769993	2.13767	0.878556	0.890608	1.05181	109	-0.350427	-0.909911	0.276142	-0.342003	-0.526853	-0.0380766	-0.296239	0.0806071	-0.948225	-0.403347	0.256252	0.0931051	0.367819	-0.405199	-0.00842597	0.417956	-0.0989436	-0.00774247	0.507696	-1.29115	-0.119656	-0.297568	0.910309	-0.604678	-0.12551	-0.319987	-0.475951	-0.765191	-0.197492	-0.234048
110	-1.95422	0.685444	2.27584	0.770923	0.453772	-0.204883	0.441817	0.796636	-0.232124	-0.119528	0.665677	1.3005	2.05207	0.420661	1.45963	1.60165	0.522538	0.808058	110	-0.0873106	-0.952612	0.0253054	0.0662433	-0.561028	-0.104894	-0.286643	-0.194237	-0.780435	-0.114288	-0.207307	-0.0645127	0.241609	-0.404204	-0.158079	-0.134304	-0.447623	0.0655861	0.0210497	-0.837471	-0.894988	-0.208195	1.04074	-0.726419	0.102665	0.0134414	-0.183799	-0.369128	-0.105813	0.0456683
111	-2.22785	0.484596	1.97499	1.06654	0.338173	0.694613	0.636646	0.763134	0.410794	-1.17812	0.47633	1.49602	1.27548	0.0356902	0.763602	1.52185	1.21671	1.11762	111	-0.113896	-1.50542	0.406501	-0.220813	-0.372201	0.297236	0.0684328	-0.383645	-0.869142	-0.10009	-0.0379341	0.114583	0.541614	-0.577884	-0.451443	-0.0957073	-0.192374	0.277898	-0.278164	-0.717044	-0.852385	-0.679809	1.24212	-0.140267	-0.611027	-0.186148	-0.244428	-1.01765	0.00935245	0.110435
112	-1.2556	0.745461	1.4846	1.22329	0.529149	0.220229	0.730391	1.16999	0.916051	-0.343607	0.64079	1.88148	1.40353	0.483922	1.15917	1.46217	0.678955	1.35987	112	-0.379624	-1.32551	0.126807	-0.213021	-0.291203	-0.121055	-0.0902825	-0.00300714	-0.942039	-0.24372	0.143536	-0.162885	0.0831782	-0.442135	-0.256759	0.223995	-0.338625	0.224484	0.796525	-1.20669	-0.546352	0.198656	0.446062	-0.900274	-0.585636	-0.55815	-0.338485	-0.578782	-0.327761	0.129519
113	-0.732077	0.806659	1.33279	0.885548	0.0635622	0.524434	0.932997	0.884685	0.045197	-0.864008	1.04326	1.82641	0.303827	0.720762	1.93468	1.38108	0.687911	0.888634	113	0.387726	-1.26423	-0.0759123	-0.0235931	-0.503977	-0.335667	0.126803	0.130046	-0.6672	-0.196589	0.174876	-0.70845	0.360009	0.0177148	-0.141309	0.342267	-0.197013	0.196322	-0.539405	0.0275452	-0.307261	0.0835642	1.39828	-0.960543	-0.211223	-0.528873	-0.334852	0.75301	-0.0354483	0.600856
114	-1.32247	1.72696	1.18184	0.759149	0.603218	0.340355	0.399381	0.750778	0.0390597	-0.663696	0.977158	1.09831	1.35328	0.358319	1.39589	1.26579	0.257271	1.30199	114	0.200504	-1.28404	0.0947467	-0.0500339	-0.506698	-0.194005	0.0308974	-0.0936848	-0.933732	-0.145741	-0.0357389	-0.558618	0.0288215	-0.0914139	-0.11925	0.291377	-0.414057	0.327078	0.0496264	-0.367064	-0.655366	0.127739	1.08046	-0.785129	-0.532795	-0.901199	-0.44553	0.673602	0.0625458	0.277518
115	-0.78596	1.42754	1.53676	1.26145	0.606462	0.305422	0.282542	0.50196	0.788323	-0.0849006	0.409438	1.2865	1.70794	0.482758	0.980194	1.51312	0.721903	0.358009	115	0.336749	-1.33938	-0.0127731	-0.184014	-0.399166	-0.394117	-0.143422	0.022363	-0.395082	0.0580375	0.234635	-0.343146	0.0883841	-0.428262	-0.294203	0.0548569	-0.473066	0.26426	0.0871951	-0.506774	-0.763576	0.550952	1.19117	-0.399174	-0.160827	-0.266185	-0.739841	0.0524637	-0.8792	0.125797
116	-1.93339	1.48799	1.18956	0.752274	0.467003	0.399221	0.389307	0.589422	0.660751	-0.473581	1.35741	0.903957	0.817321	0.741187	0.90761	2.003	0.705442	0.673063	116	-0.177071	-1.46681	-0.239217	-0.480194	-0.180653	-0.378746	0.171987	-0.0848574	-0.42193	-0.19471	0.268826	-0.0769072	0.0875673	-0.24746	-0.131686	0.224751	-0.635347	-0.117214	-0.626964	-0.437514	-1.06314	-0.372578	0.548333	-0.615267	-0.341842	0.105133	-0.303433	-0.373498	-0.0991743	-0.0572036
117	-0.922486	1.52582	0.556944	1.02106	1.02712	0.566638	0.842018	0.590666	1.08822	-1.16948	1.02896	1.95091	1.24625	0.78361	0.632884	1.61132	0.487402	0.920565	117	-0.370726	-1.62239	-0.0165903	-0.165081	-0.470452	-0.240415	0.39551	-0.188041	-0.671947	0.00434723	0.357652	-0.110986	0.22067	-0.248246	-0.325257	0.412422	-0.251446	-0.412982	-1.42223	-0.354702	0.424163	0.0877101	0.867965	-0.139983	0.300232	0.544387	-0.42114	-0.995579	-0.300291	-0.159831
118	-1.80047	0.632671	1.15714	0.799491	0.584438	0.00517439	0.60098	0.79573	0.705113	-0.460874	0.820826	1.91058	1.7473	1.25069	0.375549	0.987668	0.735811	0.736825	118	-0.0797551	-1.35632	-0.217657	-0.0769626	-0.34272	0.0272962	0.0109227	-0.166544	-0.348034	-0.084674	0.0124348	-0.234433	-0.406284	-0.163977	0.0430119	0.435765	0.0327113	-0.0986615	0.173154	-0.336768	-1.06474	0.272126	1.52962	-0.529745	0.0679602	-0.041349	-0.515373	-0.302444	-0.819811	0.141588
119	-1.17043	0.970938	1.16546	0.991243	0.522189	0.0988127	0.0756039	0.768168	0.351731	-0.91678	0.759279	1.21296	1.01556	0.895065	0.696896	0.895485	1.21138	0.630033	119	-0.177345	-0.976105	-0.0546092	-0.0496002	-0.601816	-0.0595862	0.073814	-0.2481	-0.409412	-0.101649	-0.456086	-0.0720091	-0.134394	-0.491164	0.323601	0.149301	-0.341428	0.111614	0.621288	-0.396793	-0.268748	-0.0180745	1.05841	-1.08408	-0.444162	-0.417549	0.346916	-0.165022	-0.348243	-0.143982
120	-1.10043	0.919499	1.09184	1.18165	0.484958	0.704184	0.39302	0.541555	1.2707	-1.99532	0.745904	1.59492	0.834312	0.154382	0.549093	1.01195	0.733851	0.790685	120	0.0290525	-1.32775	-0.231593	0.146775	0.0492996	-0.0698975	0.0752767	-0.24827	-0.686683	-0.495794	0.0681653	-0.316048	-0.172542	-0.205732	-0.454921	0.0598984	0.187978	0.123025	0.140501	-0.496188	-0.706669	-1.18773	1.762	-0.986581	-0.120891	-0.335181	0.680437	-0.186623	-0.000856415	0.564548
121	-1.57014	0.42473	0.617947	1.28319	0.0155463	0.621108	0.720093	0.840212	0.370542	-0.380442	0.786123	0.678049	-0.0855325	-0.0118473	0.00247808	1.89351	1.24736	1.22896	121	-0.215576	-1.31613	-0.0896163	-0.47228	0.0328463	-0.251427	0.513116	-0.341402	-1.03852	-0.104024	0.309507	-0.0287218	-0.011563	-0.344444	-0.137758	-0.0578996	-0.1794	0.175226	-0.184932	-1.04984	0.253589	-0.317144	1.15296	-0.652482	0.380594	-0.188561	-0.736356	0.393865	-0.179648	0.177739
122	-1.36428	0.414253	1.5508	0.928067	0.8887	0.696152	0.989361	0.124302	0.394453	-0.54301	0.611667	1.36558	1.61462	0.803863	0.986609	0.950286	0.836187	0.755097	122	-0.327423	-1.49667	0.0502394	0.00935615	-0.67036	0.12122	0.74992	-0.528329	-0.346521	-0.110853	0.236545	-0.125608	0.0394895	-0.68287	0.234108	-0.215669	0.363515	-0.140471	-0.223779	-0.587492	-0.968198	1.05709	1.30975	-0.418018	0.0997324	-0.335193	0.320345	-0.175078	-0.532471	0.829322
123	-2.41179	1.00577	0.585148	0.490437	1.19117	0.412774	0.192875	0.369789	0.53966	-0.34691	0.917894	1.60709	0.305323	-0.665421	0.906424	0.981514	1.08491	0.902443	123	0.254241	-1.51079	-0.191386	-0.00692404	-0.00533663	0.179534	0.65901	-0.317678	-0.744235	-0.590996	-0.171814	0.103147	0.0446042	-0.557737	-0.254895	-0.109047	-0.0196945	0.317904	0.0427993	-0.161563	-0.614396	-0.536431	1.12007	-0.550165	-0.438552	0.102517	0.256949	-0.161503	-0.500564	0.391807
124	-1.77489	1.65414	1.03019	1.38509	0.715945	0.710856	0.451562	0.442881	0.706896	-0.991405	0.891403	1.21121	1.27047	-0.178198	0.449706	1.94137	1.10365	0.702812	124	-0.539993	-1.17534	-0.401629	-0.520128	-0.310365	-0.165158	0.0471688	-0.047985	-0.266495	-0.17842	0.211864	-0.00516198	0.228153	-0.32382	0.0341983	-0.503452	0.19302	-0.100104	0.143477	-1.41822	-0.00614179	-0.531663	0.507079	-0.921142	-0.178328	0.619249	-0.000931236	-0.569341	-0.573318	-0.0263437
125	-1.26005	0.439307	0.833899	1.1997	0.631752	0.884786	0.687604	0.745583	0.356722	-1.28378	1.11977	1.76897	1.22017	-0.107093	0.983069	1.61184	1.38956	0.523454	125	-0.231428	-1.30805	0.166965	-0.54335	-0.0911183	-0.531815	0.116049	-0.364548	-0.522382	-0.14604	0.298453	-0.279938	-0.0140675	-0.346595	0.561492	0.104682	-0.402425	0.573854	0.229121	-0.627883	-0.426321	-0.357833	1.58767	-0.501488	-0.867015	-0.642749	0.21033	-0.184881	-0.453071	-0.189673
126	-1.34998	0.0392884	1.08655	0.868529	0.930606	0.737666	0.739435	0.732376	0.394682	-1.06098	0.993009	1.33839	1.20104	-0.210433	-0.104652	1.66728	0.825859	0.759808	126	-0.429248	-1.25578	0.326655	-0.414393	-0.242945	-0.424904	0.370371	-0.120486	-0.771834	-0.165816	0.200253	-0.0168875	0.185142	-0.337213	0.308132	0.154556	-0.354452	-0.0243956	-0.793762	-0.267931	-0.0226273	-0.356701	1.26429	-0.717078	-0.344686	-0.0520913	-0.017622	0.22842	-0.776823	0.28383
127	-1.2137	0.851596	0.671296	0.958298	0.715594	0.645799	0.479644	0.705167	0.588232	-0.426827	1.4812	0.983391	0.0192745	0.317	1.05325	1.03841	1.26316	1.09275	127	-0.283828	-1.02768	0.159134	-0.299605	-0.427875	-0.141871	0.527763	-0.000733414	-0.913103	-0.210777	-0.046818	-0.236054	0.0980676	-0.507355	0.113613	0.0162343	0.0821505	-0.0878308	-0.815058	-1.5523	-1.00705	-0.288686	1.17719	-0.337964	0.164709	-0.824853	-0.284538	0.201931	-0.715845	-0.350156
128	-0.978676	1.23763	0.365095	1.23972	0.752494	0.863383	0.894243	0.739279	0.42507	-0.019747	0.86145	1.25076	1.40962	-0.78243	0.771989	1.48154	1.00191	0.860083	128	-0.117051	-1.07777	-0.105221	-0.00562123	-0.257504	0.268275	0.153228	-0.412511	-1.29969	-0.0333804	-0.0124374	-0.437262	0.108311	-0.178837	0.0567372	0.0211596	-0.0607019	-0.230035	0.590197	-0.890533	-0.722516	0.873963	1.16649	-0.240496	-0.336849	-0.285461	-0.177355	-0.263507	-0.363976	0.39075
129	-1.24508	0.711115	1.49403	0.867606	1.0873	0.328592	0.371529	0.585423	0.493383	-0.849913	0.832773	0.746513	0.653993	0.683638	1.23637	1.31575	0.620135	0.643072	129	-0.190351	-0.850912	-0.440633	0.117235	-0.271285	0.134541	0.294438	-0.280044	-1.57788	-0.126112	0.0744213	0.435496	0.0457885	-0.556816	-0.0664033	0.479566	-0.113692	0.0711494	-0.488443	-0.575067	0.246529	-0.531901	0.473967	-0.9851	-0.243613	-0.446799	-0.407878	-0.832278	-0.218397	0.0667973
130	-0.256336	0.349984	1.33923	1.27214	0.946915	0.658432	-0.0232054	0.508429	0.810941	-0.891068	1.21898	0.659014	0.806503	-0.00995797	0.181422	1.55009	0.835873	1.6023	130	-0.247095	-1.42589	-0.287687	-0.237783	-0.309493	-0.220421	-0.425341	0.0515507	-0.829713	0.0259987	0.024281	0.0254363	0.212852	-0.434977	0.0127374	-0.182418	-0.260296	-0.0210689	-0.247701	-0.736282	-0.282811	0.0201648	1.76848	-0.210841	0.0716765	-0.604977	-0.1333	-0.324464	-0.0886839	0.199948
131	-0.727366	0.722864	0.687299	0.696082	0.194833	0.371418	1.29778	0.535894	0.426962	-0.687749	0.959528	1.52924	1.68545	0.37229	1.04716	1.69876	0.130919	1.24811	131	-0.255783	-1.27565	-0.158801	-0.357621	0.337103	-0.15194	0.359218	-0.26274	-0.817065	0.0436161	0.236046	0.127584	0.0244307	-0.561735	0.166486	0.0221104	-0.479972	-0.31393	-0.589767	-0.665369	-0.815832	0.114122	0.0468108	-0.648214	0.356868	-0.0865498	-0.710592	-0.513276	-0.432184	-0.253977
132	-1.19669	0.736043	0.173172	1.00372	1.24969	0.385156	0.156695	0.798608	0.375872	-0.669033	0.615732	0.39653	0.634665	-0.50634	1.23817	1.69698	0.774998	0.559759	132	-0.0544488	-1.26739	-0.440042	-0.291758	-0.386225	-0.553201	0.215832	-0.0726816	-0.851747	-0.383014	-0.212429	-0.0806606	0.069916	-0.890086	-0.364906	0.0553072	-0.171941	0.221845	-0.869125	-0.717739	0.604076	0.586566	1.51795	-1.07419	-0.1149	-0.59706	0.469737	-0.0725271	-0.476849	0.857196
133	-1.24431	0.81214	0.520352	0.944817	0.479122	0.358208	0.111716	0.449912	1.08341	-0.244047	0.40751	0.66848	1.24299	0.206421	0.810093	1.28327	0.985011	0.656825	133	-0.193445	-1.47087	-0.0914133	0.0271896	-0.471376	-0.549705	-0.350909	-0.219908	-0.775683	-0.178909	0.27248	-0.155707	0.104631	-0.845755	-0.090661	0.0874602	-0.594088	-0.207414	-0.021174	-0.167716	-0.113193	0.270268	0.462085	-0.597162	-0.348464	0.406564	-0.741554	-0.790455	0.00334675	-0.430217
134	-0.836711	0.0204642	0.310575	0.691747	0.918264	0.552619	0.15278	-0.13047	-0.100714	-0.364302	0.55202	0.941318	1.84936	1.23978	0.948989	1.94096	0.421339	0.896708	134	0.0867403	-1.1855	-1.56528	0.0954861	-0.286125	-0.0194614	-1.04994	-0.128867	-0.814694	-0.334335	-0.137802	-0.214908	-0.0317334	-0.715343	0.0986964	0.0519603	-0.19968	-0.158082	-0.0426164	-0.0677965	-0.36451	0.438627	0.968084	-0.745777	-0.676639	-0.869729	-0.310739	0.0104286	-0.721432	0.324452
135	-1.21881	0.401354	0.441605	0.876183	0.804781	0.337818	0.478697	0.786214	0.868159	-0.627804	0.634078	1.0886	0.919001	-0.138696	0.980346	1.22053	0.675538	1.02025	135	0.0429873	-1.37558	-0.916243	-0.611465	-0.288992	0.0435633	-0.524489	-0.232149	-0.766879	-0.148567	0.173478	0.0124835	0.144046	0.0118213	0.0794977	0.825548	-0.709095	-0.228233	-0.525858	-0.861382	-0.146291	0.754705	1.78206	-0.908589	-0.438009	-0.194851	-0.291577	-0.504755	-0.888828	0.247504
136	-2.39321	-0.355709	1.1557	0.368071	0.696133	0.0897644	0.727265	0.448653	0.426498	-0.777745	0.88473	1.35749	1.11611	-0.460559	0.849752	1.45135	1.04332	0.328241	136	-0.0873635	-1.14539	-1.01029	0.357405	0.0866649	0.391536	-0.158334	-0.306836	-2.11811	-0.1491	0.0458511	-0.318649	0.152627	-0.0106278	-0.111976	0.373425	-0.091939	0.038908	-0.003933	-0.71273	-0.204269	-0.767042	0.606735	0.253881	-0.14816	0.154569	-0.477477	-0.52293	-0.00831257	0.55381
137	-2.17908	0.126862	-0.144714	0.388334	0.437974	0.927817	0.0390426	0.597127	0.776303	-0.677136	0.00873625	1.45326	0.914817	0.236236	0.287382	1.56841	1.20526	0.13259	137	-0.0801087	-1.00291	-0.707238	0.231483	-0.0477177	0.308845	-0.314871	0.167974	-1.03914	-0.0296308	-0.0871775	0.171922	-0.219045	-0.42205	-0.0522915	0.109044	-0.285412	-0.139073	-0.1856	-0.693473	0.655147	-0.789177	0.943886	-1.30334	-0.397124	-0.994595	-0.125549	0.654278	0.153396	-0.208634
138	-1.23531	0.708043	0.466582	0.788732	0.614669	0.587528	0.122721	0.814507	0.154167	-0.870096	-0.332168	0.957898	0.338904	-0.576988	-0.0678407	1.53527	0.653648	0.523512	138	0.0385536	-1.53889	-0.338576	0.147706	-0.176982	0.0135344	0.110473	-0.0378008	-0.957916	-0.133585	0.0131114	0.173578	0.00122595	0.00926995	0.100181	-0.0115189	-0.24207	0.0993925	0.0797464	-0.510735	-0.287152	-0.35689	1.2398	-1.5226	-0.221885	-0.179791	0.188588	-0.760252	-0.226054	0.469269
139	-1.27514	0.690344	0.745037	1.09821	0.807612	0.449176	0.468369	0.576276	0.596503	-0.63297	0.156179	0.760221	1.62532	-0.488643	0.994368	1.80956	0.690844	0.54825	139	-0.117949	-1.34683	-0.814147	0.296968	-0.351264	-0.170049	0.0192543	-0.210223	-1.31338	-0.515472	0.00499945	-0.215249	-0.197351	-0.368058	-0.0314634	0.134124	-0.189373	-0.260942	-0.890378	-0.402116	-0.447387	0.143098	1.60703	-0.572627	-0.070957	-0.311242	0.500136	-0.574429	-0.644424	0.459042
140	-1.33868	0.489745	0.987456	0.618339	0.891474	0.61199	0.308042	0.794641	1.02144	-1.05504	0.898435	1.1648	1.78332	0.050752	-0.0795242	1.51426	0.751111	1.10076	140	0.0103564	-2.2738	-0.614642	-0.0121202	-0.0763062	-0.000707864	0.161418	0.0428365	-1.23627	-0.275989	0.00898972	-0.00238403	-0.0134148	-0.359281	0.0267442	0.0793188	-0.259606	-0.341083	-0.489354	0.0210371	0.318369	0.289738	0.802727	-0.153709	-0.571489	-0.704707	-0.417429	0.0576332	0.335719	0.106824
141	-1.66237	0.699147	1.36557	0.952015	0.485662	0.485374	-0.0216775	0.328726	0.231792	-0.807014	-0.0163966	0.970726	0.585419	-0.0726762	0.720945	0.940763	1.34376	0.797004	141	0.0613855	-1.95264	-0.577034	0.100228	-0.656725	-0.30082	-0.0288481	0.623285	-0.931756	-0.154891	0.143638	0.404928	0.00213406	-0.469929	0.266277	0.157054	-0.257759	-0.270378	-0.417239	-0.61797	-0.439453	0.823635	0.728431	-0.774301	-0.65641	-0.870354	0.797984	0.236981	-0.642826	-0.278877
142	-1.08868	0.52843	1.68025	0.827552	0.582846	0.360691	0.105004	-0.784061	0.0486003	0.374446	-0.196903	1.09146	1.1393	0.808396	0.532122	1.20929	0.917488	1.04985	142	-0.129295	-1.72918	-0.443307	0.178057	-0.171979	-0.0701976	0.121561	-0.626727	-0.778866	-0.159341	-0.0644252	0.140402	-0.0960003	-0.157143	0.189617	0.190562	-0.331107	0.0741569	-0.677837	-0.913289	-0.191852	0.121093	0.836679	-0.5355	-0.106119	0.0393286	-0.0439294	-0.793772	-0.29937	0.15308
143	-1.22742	0.0260665	1.74475	0.783018	0.669157	0.576204	0.259223	0.465519	-0.460501	-0.339911	-0.273379	0.437525	0.93523	-0.559322	1.26023	1.44238	0.865848	0.495211	143	-0.145695	-1.69707	-0.416657	0.661022	-0.513518	0.207167	-0.0244914	-0.892157	-0.705218	-0.190873	0.0275758	0.0925044	0.0195074	-0.160409	0.00681415	-0.267004	-0.203394	0.140428	0.119669	-0.378143	-0.0777575	0.384629	1.35551	-0.069981	0.0808091	-0.680464	-0.179293	-0.176244	0.840496	-0.00256802
144	-1.58768	-0.618318	1.15267	0.622753	0.890129	0.700772	-0.960945	0.357402	-0.0785723	-0.377065	0.221555	0.815802	0.745332	0.710164	0.976137	2.0145	0.782334	0.593898	144	-0.0200908	-1.57358	-0.422579	0.388511	-0.192571	-0.0469599	0.129779	-0.570211	-0.987056	-0.274413	0.111868	-0.0567926	0.209056	-0.0593713	-0.327819	0.289626	-0.141608	-0.335385	-0.307269	-1.2047	0.293973	-0.153604	0.353992	-0.500253	-0.213095	-0.552481	-0.798607	0.115992	-0.267778	0.915298
145	-1.13213	-0.150356	1.71681	0.621797	0.884627	0.475593	-0.532342	0.38686	1.09094	0.269757	0.90681	0.704004	0.833516	-0.0580116	0.944413	0.880898	0.648904	0.964058	145	-0.249109	-1.45939	-0.211841	0.397184	0.271076	-0.397396	-0.100468	-0.401683	-1.23711	-0.156558	-0.144684	-0.117262	0.0418218	-0.195197	0.30086	-0.172084	-0.253534	-0.14449	-0.85476	-0.743655	-0.286897	0.929696	1.09624	-0.508897	-0.543044	0.176705	-0.05362	-0.138642	-0.488176	-0.327565
146	-1.77246	-0.69418	1.59354	1.15502	0.811986	0.340968	0.78694	0.746874	0.530306	-0.588736	-1.1079	0.235724	1.29007	0.507582	0.927586	1.32314	0.445671	0.614985	146	-0.430957	-1.42817	-0.0316782	0.400827	-0.140454	0.309727	0.0401577	-0.385759	-0.824159	-0.0923764	0.0654536	-0.19319	-0.0366566	-0.201455	-0.0767716	0.0948529	-0.159714	0.14468	0.24494	-0.410325	0.306352	0.593718	1.07778	-0.00483269	-0.294415	-0.320651	0.322847	0.0727894	-0.887685	0.515997
147	-0.580413	0.191836	0.675369	0.312696	0.866625	0.563892	-0.0933442	0.684806	1.2904	-1.29674	0.38442	0.966817	1.15797	-0.212693	1.49621	1.20167	0.766836	0.831965	147	-0.484715	-1.31059	-0.7114	-0.0947585	-0.530766	-0.538778	-0.073126	-1.01759	-0.869249	0.0410004	0.250783	0.0449982	0.168774	-0.0671375	0.0911125	-0.0427911	-0.0768208	0.110387	-0.44742	-0.906029	0.55513	0.043399	1.21255	0.155371	0.277652	-0.276826	-0.771451	-0.973672	0.324835	0.04858
148	-1.54903	-0.139496	0.816363	0.920401	0.873288	0.335997	0.266344	-0.782374	0.357929	-1.13969	0.148906	0.890909	0.999241	-0.510337	0.56176	1.54722	0.359483	1.16655	148	0.00167159	-1.5465	-0.939004	-0.000213739	-0.0614593	-0.0387924	0.402713	-0.00728978	-1.17296	0.211383	-0.0278871	-0.171497	-0.245301	-0.299572	-0.200872	0.460353	-0.360342	-0.0155963	-0.430007	-0.576894	-0.707176	-0.339161	0.798708	-0.948434	-0.369845	-0.234389	-0.106522	-0.262633	-0.422185	0.629121
149	-1.07022	-0.158481	1.6255	0.871043	0.401289	0.332177	0.0319132	0.452031	0.540079	-0.0137729	0.640232	0.572703	1.15023	-0.280666	1.0492	1.30636	0.478575	0.674779	149	-0.254746	-1.16291	-0.969196	-0.662311	-0.230126	-0.328987	0.0998169	-0.492934	-0.570988	0.312712	-0.106081	-0.090768	0.0562922	-0.0663823	0.0795094	0.0590258	0.0992116	0.25309	-0.0396404	-1.26219	0.142411	0.366975	0.655514	-0.670412	0.117588	-0.510594	0.184956	-0.360198	-0.442021	0.466641
150	-1.20931	0.477151	1.21616	0.546497	1.15263	0.129941	0.401116	-0.00280785	0.688371	-0.572519	0.789708	0.612351	0.930021	0.428441	0.734463	1.00316	0.357903	0.691764	150	-0.129311	-1.22106	-1.11871	0.528539	-0.007546	-0.0483168	-0.235399	-0.410272	-0.800652	0.135364	-0.0965191	-0.109744	-0.51067	-0.84487	0.383192	0.00683024	0.0780081	0.217013	0.115465	-0.544137	-0.838975	-0.158787	0.786404	-0.803035	-0.483868	-0.29324	0.0910211	-0.720763	-0.577182	0.911954
151	-0.864498	0.195539	0.786282	0.604663	0.887098	0.415183	-0.223508	0.462973	0.580294	-0.692477	0.586704	0.207148	1.7294	-0.422339	0.200532	1.56482	0.650285	0.163137	151	-0.219207	-1.18969	-0.730501	0.177861	-0.282347	-0.0836746	0.377543	-0.539328	-0.540301	0.13034	-0.236028	-0.214875	-0.141428	-0.0106963	0.0990447	0.315771	-0.43163	0.0872517	-0.41407	-1.13384	-0.532737	-0.310211	0.916308	-1.09549	-1.01946	-0.990645	0.0299335	-0.173772	-0.157238	-0.766666
152	-2.00117	0.125838	0.809824	0.695099	0.749446	0.0790824	0.01908	0.0502944	0.234418	-0.346523	0.381055	0.422786	1.65078	0.571575	1.15669	1.17781	0.837658	0.431416	152	0.16297	-1.43974	-0.834605	-0.326332	-0.404951	-0.0494901	0.033425	0.0688026	-0.565355	-0.14437	0.207916	-0.488639	-0.0885313	-0.347248	0.157034	-0.210268	-0.482794	-0.0165643	-1.10709	-0.327286	0.237684	0.328567	0.637588	-0.29151	0.156718	-0.467116	0.292798	-0.0584286	-0.399348	0.837384
153	-2.1815	0.072032	0.83177	1.21082	0.66994	0.455431	-0.0240943	0.285796	-0.0600522	-0.758953	0.692576	1.1041	1.47401	0.410918	1.38065	0.903258	0.43054	0.469547	153	-0.092269	-1.52775	-0.526764	0.135499	0.0840147	-0.0256272	-0.210445	-0.140351	-0.519757	-0.120362	-0.022794	-0.174069	0.0070302	-0.315965	0.158722	-0.233036	-0.252576	0.364032	-0.87159	-0.71717	0.327907	0.105091	1.08214	0.0854808	-0.569918	0.242561	0.583289	0.328803	-0.274009	0.521741
154	-1.13907	-0.471335	0.385607	0.770732	0.4039	0.256602	-0.0289412	0.299703	-0.157225	-1.01445	0.472615	0.914309	1.1497	0.473971	0.483242	1.34241	0.195045	-0.0146893	154	-0.231942	-1.19741	-0.490316	0.409044	-0.405026	0.307743	-0.649877	-0.00902351	1.45981	0.231064	-0.311739	0.24972	-0.0916506	-0.11808	-0.347139	-0.11431	0.0889755	0.0377083	-0.93601	-0.0350298	0.438851	0.450932	0.744755	-0.326476	-0.226083	-1.09978	0.789925	-0.360618	0.120328	-0.251043
155	-1.16294	0.28237	0.858885	1.09181	0.313852	0.379328	0.129961	0.238463	-0.0634919	-0.567252	0.414923	0.588703	1.7862	0.401886	0.444715	1.25526	0.875095	0.547982	155	-0.00733786	-1.18445	-0.937534	0.085948	-0.824854	0.393888	-0.141601	-0.210586	1.2016	0.195304	-0.392454	0.14529	0.325737	0.0921606	0.396571	0.302441	-0.989393	0.0262958	-1.18007	-1.37915	-0.120868	0.818675	0.880574	0.0180709	-0.707356	-0.27404	-0.06986	0.396177	-0.271237	0.48926
156	-1.35355	0.397189	0.81575	0.551536	0.771049	0.318045	0.23891	0.288305	0.0169471	-0.60361	0.716731	0.292023	0.975605	0.352602	0.408369	0.926968	0.0232527	0.476612	156	0.115822	-1.17029	-0.696871	0.0971609	-0.171558	-0.695056	-0.219573	-0.409974	0.488985	0.208532	-0.0240288	0.24243	0.218956	-0.149732	-0.189961	-0.11424	-0.371754	0.0111814	-0.093357	-0.782241	0.668037	-0.31482	0.925868	-0.741234	-0.177994	-1.02657	0.0639366	0.182952	-0.71887	-0.392618
157	-1.16023	0.369032	0.856985	0.516949	0.742347	0.20954	0.188682	0.280677	-0.063297	-0.539436	1.09931	0.862196	1.05395	0.548382	0.224821	1.4739	0.722834	0.322387	157	-0.15851	-1.16656	-0.39179	-0.0404581	0.187989	0.322851	-0.266388	-0.15002	0.303293	-0.265085	-0.286592	-0.446604	0.00395083	-0.502056	-0.0642883	0.221661	-0.330251	0.228804	-0.12476	-1.35471	-0.264227	0.0402294	0.115678	0.0182637	-0.0590452	-0.543614	0.460036	0.20322	-0.361933	0.0439182
158	-1.75452	0.600098	0.759884	0.616401	0.635947	0.0116307	-0.0309324	0.170125	0.0402484	-0.46538	0.724298	0.37178	1.09686	0.285062	0.780606	1.48875	0.396259	0.501332	158	-0.422168	-1.32627	-0.537701	0.472826	0.262276	0.146682	-0.0742292	-0.249409	-0.0873778	-0.392561	0.139798	-0.375564	0.209	-0.326602	0.192098	0.374493	-0.647856	0.150157	-0.267157	-0.93425	0.420302	0.68337	-0.309188	-0.789449	-0.305773	-0.403972	0.550745	0.603848	-0.368827	0.203585
159	-0.759769	0.676942	0.253826	0.17926	0.518575	0.229584	0.159012	0.35642	0.302659	-0.647532	-0.38918	-0.139	0.187457	-0.663835	0.965976	1.52876	0.454767	0.550943	159	0.0492386	-1.52242	-0.617189	-0.0549178	-0.481118	0.112242	0.137154	-0.189696	-0.0367908	-0.0677735	0.052018	-0.319411	-0.148503	-0.356041	-0.0709325	0.150375	-0.395263	0.0451177	-0.0952647	-1.29444	-0.137298	0.589566	0.961771	-0.981175	0.245003	-1.24196	1.36795	0.623828	-0.144267	0.435401
160	-2.06794	0.844427	0.689659	0.674657	0.610432	-0.0952176	0.276589	0.621525	-0.19117	-0.259215	0.74414	0.399922	0.485699	-0.802221	0.663156	1.39982	0.152601	0.257284	160	-0.296863	-1.39057	-0.120948	-0.281381	-0.10802	-0.784199	0.0690827	-0.253198	-0.061692	0.303814	0.110638	-0.369745	0.0854351	-0.720442	-0.233503	-0.0971422	-0.321769	0.0394883	-0.571022	-1.09319	-0.291293	0.552096	1.15554	-0.325551	-0.24268	-0.805587	0.493884	0.320357	-0.636574	0.419512
161	-0.690439	1.02992	1.43013	0.77176	0.902759	0.382249	0.737643	0.924016	-0.13131	-0.413682	0.727407	0.156191	0.44568	0.801287	0.421454	0.750047	0.0501657	0.309073	161	-0.15195	-1.15636	-0.591574	0.162142	0.120108	0.283153	0.0298007	-0.182815	-0.112002	-0.275798	-0.231104	-0.221342	-0.2981	-0.409792	-0.476807	0.366298	-0.475722	-0.329171	-0.472442	-0.702431	-0.408521	0.851621	-0.148528	-0.382607	0.0378023	-0.901307	0.489091	-0.0568702	-0.498017	0.164779
162	-1.04183	1.51689	1.10124	0.742675	0.34521	0.11376	0.00637318	0.460846	0.0258933	-0.679203	0.266725	0.268634	0.794062	-0.0220712	0.628856	1.01584	0.203712	0.398052	162	-0.2361	-1.34268	0.0196299	-0.423398	0.332649	0.358887	0.17435	-0.722899	-0.684815	-0.173223	0.0462648	-0.503637	-0.122816	-0.322612	-0.214674	0.134705	-0.556295	0.27322	-0.28508	-0.423527	0.0316573	0.23298	0.383355	-0.129786	-0.480599	-0.752683	-0.41559	-0.645167	-0.178419	0.541179
163	-2.57407	0.223081	-0.448212	0.706457	0.213001	0.251813	0.249663	-0.401179	0.627142	-0.512011	0.5094	0.562512	1.12011	0.354574	0.978947	1.23867	0.263313	0.562122	163	-0.469855	-1.5222	-0.478067	-0.0870389	0.254435	0.43975	0.0341854	-0.669111	-0.535464	0.163863	0.314537	-0.242862	0.20433	0.0311889	-0.223553	-1.01607	-0.216651	-0.0628094	0.0206853	-0.373078	0.222471	0.769812	0.608997	-0.741564	-0.373697	-1.50316	0.620852	0.286187	-0.248608	0.554773
164	-0.890924	0.685731	0.140913	0.476663	0.797743	-0.328107	0.197861	0.0180116	0.573891	-0.361577	0.985644	0.174896	1.28656	0.0725775	0.970423	1.44777	0.568229	0.336603	164	-0.0728951	-0.662074	-0.607695	0.00916005	0.463231	-0.190653	0.035446	-0.22445	-0.571885	-0.261691	0.413448	-0.282344	0.108882	-0.0619809	-0.240649	0.287082	-0.26561	0.14524	-0.700083	-0.281673	0.469068	0.657252	0.629438	0.0234797	-0.804141	-0.36891	-0.379529	-0.171822	-0.721573	0.69739
165	-1.01676	1.2069	0.0947717	0.682531	0.495495	0.429401	-0.104486	0.494124	0.0613225	-0.820563	0.342177	0.21583	1.03216	0.0887642	0.929286	1.04739	-0.0897908	0.414524	165	-0.220927	-0.439263	-0.494646	-0.110863	0.0444932	-0.152085	-0.231151	-0.2685	-0.0290981	-0.0635391	0.353412	-0.305565	0.121454	-0.129979	-0.404167	0.133941	-0.521753	-0.138389	-0.156755	-0.805912	-0.199244	-0.429741	0.694925	-0.83341	-0.338932	-0.200619	0.348781	-0.373778	-0.534617	0.19644
166	-1.01661	0.672206	0.245029	0.529571	0.626846	0.337971	0.397573	-0.0682642	-0.204383	-0.724223	1.03363	0.0809245	-0.208421	-0.129073	0.596613	1.17442	0.303045	0.418122	166	-0.277607	-0.825367	-0.484426	-0.32559	-0.125665	-0.51887	0.172196	-0.301449	-0.388348	-0.159941	0.074388	-0.00949148	-0.0678215	-0.319164	0.286213	-0.731748	-0.154235	0.324867	-1.16583	-1.21289	0.187316	0.322944	0.920553	-0.916357	-0.0107127	-0.634081	-0.142786	-0.360755	-0.184857	-0.329179
167	-0.418383	1.16121	0.0218505	0.787028	0.489119	0.107982	-0.104993	-0.200607	0.198957	-0.716966	0.123896	0.179756	0.516564	-0.262209	0.815026	1.13112	0.0251851	0.698757	167	-0.0903783	-0.50585	-0.558417	-0.434286	-0.0506546	-0.103614	0.308393	-0.477673	-0.0852218	-0.0213958	0.163503	0.106586	-0.306604	-0.445503	-0.427441	-0.0554698	-0.416098	0.028336	-0.792255	-0.627204	0.120521	0.715894	0.00997955	-1.18477	-0.570037	-0.162283	-0.0178642	-0.488863	0.376788	0.306622
168	-1.26272	0.619834	0.632076	0.886905	0.572923	0.270613	0.0246491	0.403213	0.341224	-0.226428	0.138438	0.0634262	1.1793	-0.874292	-0.520621	0.986207	0.77207	0.77358	168	-0.529121	-0.861712	-0.992562	-0.542174	0.0521093	-0.0249337	-0.666603	0.0118703	-0.904959	-0.307082	0.252434	-0.26815	-0.037071	-0.149711	0.500588	0.226808	-0.433928	0.0623054	-1.47754	-0.38623	0.717349	0.0811593	0.70608	-1.4608	0.0535578	-0.865781	0.384788	0.457935	0.361481	0.321287
169	-0.883074	-0.309588	1.43763	0.755533	0.548609	0.373778	0.309167	0.531775	0.904919	-0.685274	-0.169511	-0.639603	1.14545	-0.224967	0.261184	1.24239	0.638327	0.385212	169	-0.294326	-0.891431	-1.35006	-0.593602	-0.0439954	-0.080325	-0.67173	-0.0826221	-0.907899	0.177922	0.400408	-0.170419	0.100694	-0.369277	0.211586	-0.142507	-0.1103	-0.119605	0.13925	-0.423483	-0.705889	-0.115608	-0.343499	-0.122076	-0.491313	-0.636078	0.183656	-0.603533	1.1559	-0.0100527
170	-1.38764	0.882009	0.743387	0.473031	0.173963	0.142685	-0.00790691	0.133007	0.415717	-1.38871	0.403469	0.792356	1.39936	0.440502	0.879253	1.35077	1.25207	0.782374	170	-0.312184	-0.829664	-1.24603	0.0244291	0.130551	-0.0604225	-0.583659	0.0429959	-0.732089	0.135013	-0.204778	0.342904	-0.0235001	-0.0786424	-0.394604	0.238051	-0.522727	0.266642	0.348376	-1.17431	-0.461833	0.188773	0.811663	-1.24466	-0.40862	-0.604883	0.36788	0.488983	-0.907994	0.391608
171	-0.241607	0.83833	0.818321	0.996774	0.209068	0.291853	0.367888	0.53634	0.302065	-0.22682	-0.272388	0.951075	1.15307	0.224284	0.747502	0.792948	0.5359	0.683663	171	-0.291326	-0.738858	-0.691966	0.198453	-0.127116	-0.195864	-0.332783	-0.165578	-0.275373	0.356178	0.0321856	-0.157056	-0.272523	-0.10782	0.318485	-0.225952	-0.234316	0.267982	-0.399055	0.460467	0.172476	0.548902	0.715756	-0.450269	-0.777307	-1.29088	0.450124	0.353424	-0.30478	1.46265
172	-1.19071	0.814489	1.50307	0.620858	0.547226	0.476966	0.0855178	0.428134	0.163727	-0.328983	-0.0473816	0.26257	1.28856	0.0686937	0.222797	1.26244	0.634502	0.00323221	172	-0.35934	-0.918949	-0.725141	0.145731	0.0382048	0.1197	-0.145968	0.106888	-0.585775	0.0432757	0.504928	0.148616	-0.279625	-0.161273	-0.181119	-0.030601	-0.175304	0.0279884	0.296442	-0.550705	-0.741776	0.355846	0.109646	-0.0545224	-0.484041	-0.762988	0.238936	-1.18349	-0.00153909	0.64438
173	-1.33255	0.245723	0.952327	0.156885	0.282632	0.248105	-0.468768	-0.269497	-0.125291	-1.30093	0.159169	0.77842	1.5155	1.03256	0.189568	1.5079	0.745748	0.828367	173	-0.0363026	-0.806334	-0.751782	0.0382345	-0.0294231	-0.126064	-0.478506	0.668789	-0.60028	-0.32408	0.154853	-0.0692827	0.0931917	-0.17122	0.00830123	0.254654	-0.341213	-0.144046	0.103582	-1.14272	-0.00108604	0.722769	1.46405	-1.44016	-0.0824085	-0.300836	0.374102	0.240432	-0.408418	0.814227
174	-1.56646	0.260894	0.182278	0.0257313	0.746706	0.486608	0.200276	0.216375	0.92886	-0.653147	-0.319051	0.410593	0.754167	0.380505	0.95598	0.936847	0.380274	0.5643	174	-0.306972	-0.813077	-0.702245	-0.0293311	-0.190209	-0.168046	-0.720849	-0.116543	-0.358322	-0.194404	-0.0769508	-0.163321	-0.0124168	-0.297891	0.288901	-0.565813	-0.367239	0.267705	0.249467	-0.885364	-0.196176	-0.118524	0.27781	-0.49038	-0.626976	0.0950019	0.433471	-1.16162	0.309547	0.0700641
175	-0.80761	0.838796	0.779586	0.426858	0.232839	0.0910201	0.18707	-0.276136	1.20715	-0.411798	0.0937206	0.2939	1.45851	0.212392	-0.357085	1.00313	0.835838	0.407468	175	0.0372416	-0.92315	-0.302269	0.19539	-0.330625	-0.257117	-0.118942	0.148183	-0.555382	0.181287	-0.101993	0.150617	0.0425578	-0.294894	-0.565314	0.0822864	-0.408323	0.0925051	-0.0546272	-0.521626	0.0126318	0.437762	0.517656	-0.0303704	-0.791005	0.328182	0.187082	0.429181	0.439392	0.715997
176	-0.6289	0.899495	-0.566926	0.655497	0.790268	0.238761	0.0608881	0.463822	-0.344108	-0.385585	-0.824776	0.26505	1.41683	0.502439	0.591365	1.50257	0.332314	0.387056	176	-0.284622	-0.96812	-0.722773	-0.0626541	-0.117264	0.0319687	-0.312026	-0.0552286	-0.981886	0.109984	-0.00465465	-0.0507555	0.288194	-0.278284	-0.131735	-0.0391092	-0.234442	-0.205508	0.305405	-0.371965	-0.149822	0.0137639	-0.83555	-1.09408	-0.363071	-0.580629	0.181471	-0.317886	-0.294614	0.443599
177	-0.69921	0.681133	2.03326	0.310667	0.668297	-0.521371	-0.596561	-0.251449	0.481652	-0.799269	-0.147734	0.0852855	0.980332	-1.14872	0.521591	1.00299	0.134105	0.427291	177	-0.167704	-1.21016	-0.270021	-0.316436	0.00144668	0.156076	-0.160775	0.0627202	-0.741515	-0.0216241	-0.0706966	-0.0606934	0.534423	-0.0298452	0.104379	0.0527682	0.174188	0.316537	-0.154054	-0.297192	-0.60065	0.606805	-0.221895	-0.00778714	-1.12811	-1.02289	0.667259	0.94935	-0.849928	0.483906
178	-0.955211	0.0647213	1.21788	0.545732	0.377824	0.372556	0.610625	0.837706	1.00436	-0.380808	0.114655	0.694897	0.909413	-0.0361449	0.409403	0.907004	0.349151	0.34009	178	0.00531481	-1.27361	-0.272603	-0.0903809	-0.373302	-0.293969	-0.447152	0.23576	-0.356742	-0.386068	0.288937	0.0625271	0.237583	-0.0391115	0.351985	-0.210992	-0.11451	0.376193	-0.990698	-0.308944	0.155639	0.801285	0.467499	-1.62062	0.324045	-0.368052	0.133633	-0.11106	0.0906835	0.41896
179	-0.545002	1.21988	0.716179	0.560345	0.724161	0.221386	-0.309844	0.240323	-0.0686358	-0.449454	0.327759	0.896853	0.620463	-0.28223	0.317732	0.708873	0.63382	0.814322	179	-0.0319339	-0.884919	-0.430878	-0.0939547	-0.325328	0.308378	-0.0718531	0.0997508	-0.290042	0.104632	0.1646	0.268475	0.147782	-0.332204	-0.252337	0.258438	-0.587451	0.0275257	-0.51199	-0.529882	-0.281275	0.999077	1.12115	-0.703604	-0.538309	-0.918194	0.223823	0.494761	-0.402018	1.01996
180	-0.542479	0.979064	0.761521	0.317543	0.703707	0.418834	-0.0284582	0.322648	0.647014	-0.70694	0.085564	1.00026	0.643707	0.51162	-0.0505828	0.698654	0.612732	0.321318	180	-0.213742	-1.55673	-0.355096	-0.0603569	0.155107	0.564221	-0.177526	-0.181174	0.250973	0.393691	-0.159623	0.312783	0.29087	0.0965143	0.133389	-0.187664	-0.371016	0.329612	-0.540116	-0.830174	0.625524	1.0735	0.595158	-0.668866	-0.37536	-1.27771	0.721159	0.238241	-0.515227	0.333188
181	-0.501076	1.18834	0.896833	0.517243	0.648329	0.32844	-0.0558392	0.193005	0.107453	-0.401284	-0.188215	0.517896	2.00113	0.327904	0.0793139	1.41793	0.977308	0.499888	181	-0.170209	-1.24153	-0.124811	-0.50907	-0.0733148	-0.013368	0.0741699	0.00823976	0.183048	0.714878	0.0526868	-0.156375	0.425715	0.187279	0.0670146	-0.101416	-0.236548	-0.100291	-0.110159	-0.477053	-0.473328	0.755324	1.05867	-1.15352	-0.209579	-0.377549	-0.289664	-1.27073	0.0773465	0.345882
182	-1.23789	0.961057	0.539991	0.639604	0.914354	0.335114	-0.511629	0.0894452	-0.952658	-0.199258	0.408641	0.679473	0.75582	-0.307245	0.586946	-0.0622061	0.432878	0.725357	182	-0.0413435	-1.22232	-0.472757	-0.569222	0.347207	0.455749	0.0933304	0.245889	0.450555	0.0540587	-0.0963682	0.453098	0.224906	-0.236546	0.0744837	0.334417	-0.423892	0.309265	-0.595051	-0.619533	-0.542887	-0.430402	0.0914561	-1.35099	-0.369401	0.084101	-0.0103517	0.206883	0.345717	0.593038
183	-0.018295	1.46284	0.83476	0.0569143	0.49422	0.198947	-0.254172	0.102112	-0.684321	0.03296	0.346612	-0.0296487	0.607323	-0.330112	-0.199367	0.830272	0.367486	0.275277	183	-0.218794	-1.19051	-0.363236	-0.197811	-0.1291	0.0789436	0.126248	0.0169826	-0.157126	-0.0660606	0.302218	-0.0349323	0.0107775	0.107448	-0.279703	0.295581	-0.187081	0.422653	-0.433626	-0.0619423	-0.513139	1.16126	-0.108299	-1.22487	-0.818471	-1.18544	-0.066903	0.00874504	0.212353	0.165629
184	-0.889686	1.74284	0.88071	0.559426	0.675865	0.501127	-0.122398	0.183423	-0.0357606	-0.743452	0.386594	0.269428	0.65015	0.449204	1.09425	0.395236	0.205784	0.230777	184	-0.19349	-1.18856	-0.26725	0.220864	-0.139469	-0.0443789	0.00688004	0.215452	0.230051	0.0681206	0.121764	-0.0197674	0.205188	0.149527	-0.227408	0.177404	-0.365305	0.1872	-1.21176	-0.399937	0.694465	-0.19141	-0.00639901	-0.0668403	0.106456	-1.32199	-0.748938	-0.163382	0.0405586	0.572744
185	-0.73806	1.30547	1.3972	0.505015	0.187916	0.632299	-0.327763	0.592207	0.0240232	-0.731044	0.70262	0.279864	0.832485	0.833473	0.100324	0.99944	0.616066	0.519395	185	-0.330818	-0.902354	-0.146238	0.194861	0.376013	0.3347	0.529318	0.187893	-0.146583	0.119431	0.124266	-0.0730338	0.123527	-0.0816908	0.160196	0.0182794	-0.599462	-0.138417	0.385119	-0.842386	-1.18633	0.800168	0.662892	-0.820935	-0.700491	-1.14464	0.601385	0.97497	0.0321426	-0.201801
186	-0.804643	0.892379	1.02197	0.774405	0.562936	0.146823	-0.0735641	0.327546	-0.0397196	-0.837083	0.182359	0.20426	1.1676	0.0191393	0.0565576	0.653882	0.0827577	0.428997	186	-0.396715	-1.5222	-0.157217	-0.0433159	-0.165061	0.121763	0.482229	0.264944	0.0692256	-0.00983973	0.134682	0.310414	0.406563	0.0654654	0.00651521	0.332874	-0.0979428	0.394249	0.0198601	-0.22963	0.584781	0.261395	1.21985	-0.605201	-0.652796	-1.04718	-0.197267	1.13165	0.662343	0.410279
187	-1.20651	1.21201	0.667694	0.449101	0.806403	0.482371	-0.459306	0.230138	0.274555	-0.863706	0.137937	0.418569	0.245963	0.219073	0.821203	0.482133	0.56294	0.108956	187	-0.269156	-1.08861	-0.240209	-0.100469	0.0361884	-0.251197	0.190704	-0.181515	-0.163673	0.201516	0.256464	-0.236845	0.389403	-0.0380119	-0.0913653	-0.0504959	-0.62844	-0.198387	-0.50313	-0.128101	-0.441623	0.315963	0.24041	-1.06474	-0.0388781	-0.0424053	-0.548594	0.785474	-0.0669177	0.608427
188	-0.914592	0.615189	0.702856	0.811716	0.798182	0.409443	0.532284	0.328427	0.164248	-0.573344	-0.230828	0.527893	1.67347	-0.473609	0.17154	0.734857	0.412978	-0.104295	188	-0.0558052	-1.26731	-0.142747	-0.0385702	0.125553	0.198676	0.214215	0.440841	-0.351098	0.037432	0.337287	-0.247891	0.475538	0.0764001	-0.236933	-0.059433	-0.670886	0.0990822	-1.07123	-0.376159	0.432739	-0.204265	-0.427085	-0.335728	-0.462019	-1.20753	-0.186262	0.197707	0.532115	0.20239
189	-0.500418	1.14536	0.839959	-0.0129392	0.685576	0.234938	-0.0044557	-0.101275	0.431623	-1.20137	0.591901	0.529521	0.726977	0.339539	0.144405	0.706225	0.615961	0.151021	189	-0.259401	-1.25453	-0.302897	-0.152375	0.00191466	-0.464201	0.340813	0.224663	-0.55006	0.0890336	0.128085	-0.0183993	0.436906	-0.47335	0.0449832	-0.226268	-0.109768	-0.136629	-0.170684	-0.351369	-0.900251	0.799847	1.02875	-1.39887	-0.528982	-0.279621	0.0332285	-0.0860547	-0.121916	0.156426
190	-0.691795	0.27724	1.63751	0.626225	-0.0536589	0.531088	0.593586	0.220969	0.37592	-1.16764	-0.19305	0.413988	0.645912	-0.516037	0.392928	0.601286	0.651684	-0.178417	190	-0.264636	-1.48646	-0.257642	-0.0028042	-0.071046	0.000178617	0.125609	0.252039	-0.0620871	0.137483	0.0241988	-0.067776	-0.0101275	0.164854	0.0756725	0.162125	-0.377192	-0.0137246	0.678431	-0.849852	-0.341064	0.72519	1.06711	-1.15465	-0.394169	-0.141851	0.425719	1.2658	0.253583	0.240298
191	-0.752077	0.835927	1.99888	0.925674	0.364652	0.339967	1.13443	0.0728126	0.438972	-0.8317	-0.161323	0.541553	1.07837	-0.0598841	-0.117506	0.496807	0.297041	0.812882	191	-0.349771	-1.35332	-0.577533	-0.177219	-0.0775457	-0.164097	0.254846	0.136459	-0.353491	0.122996	0.256114	0.135154	0.162663	-0.288771	0.100236	0.0662543	-0.8431	0.177927	0.246877	-0.322928	-0.11909	-0.167988	0.697015	-1.2142	-0.603051	-0.141924	0.452806	0.5285	1.09454	0.216222
192	-1.50967	0.380752	1.78312	0.367357	0.267423	0.263266	0.386841	0.186584	-0.382103	-0.284518	0.257055	0.637762	0.136544	-0.143268	0.0181143	0.853343	0.337587	0.248406	192	-0.140317	-1.36346	-0.0390803	0.662327	0.11623	-0.17462	0.329569	0.532083	-0.197464	-0.0524913	0.217357	-0.28266	0.320164	0.0904356	-0.413463	0.111692	-0.335067	0.0113487	-0.835368	-0.185005	-0.289571	1.09414	1.36136	-1.0096	-0.386407	-0.115786	-0.2624	0.51803	-0.15294	0.519045
193	-1.24615	-0.140122	1.09949	0.64492	0.418097	0.66769	0.519861	0.445531	0.210272	-0.640192	0.368305	0.736257	0.87614	-0.297865	0.373641	1.02839	0.408236	0.699694	193	-0.0217421	-0.945922	-0.109674	-0.157546	0.0626283	0.197032	0.0630958	0.213776	-0.581384	-0.227853	0.0371282	-0.105219	0.391925	-0.0612851	-0.305431	0.437092	-0.117134	0.299333	-0.724016	0.0182515	-0.175325	0.299802	0.950461	-0.013951	-0.133558	0.409881	0.0440947	-1.6135	0.492011	1.09375
194	-1.54292	-0.97276	2.05999	0.671949	0.190731	0.199129	0.207575	-0.328203	-0.436406	-0.352722	0.182596	0.505666	-0.680423	-0.803668	0.0943597	0.649611	0.73289	0.938702	194	0.00665896	-0.824179	-0.406133	-0.261538	-0.0571402	-0.356312	0.426933	0.275989	-0.333043	0.117403	-0.0121883	-0.194631	0.205188	-0.187187	-0.251866	0.25632	-0.0981734	0.248328	-0.881643	-0.509503	-0.10851	0.753229	-0.0753702	-0.816138	-1.09379	0.0852661	0.228973	0.39094	-0.581177	0.176149
195	-1.76804	0.2449	1.87629	0.727703	0.347277	0.598974	0.713884	0.0477599	-0.0870595	-0.550095	0.000812961	0.761443	1.2584	-0.193174	-0.127573	0.783168	0.263712	0.605289	195	-0.359947	-1.16167	-0.414346	0.0661184	-0.356418	-0.234837	0.0670483	-0.166817	-0.0751191	0.0507714	0.151143	-0.157476	-0.0283174	-0.295141	-0.371513	-0.409592	-0.357146	0.131281	-0.324746	-0.685978	0.561652	-0.179113	0.438829	-0.815883	-0.156018	-0.189792	0.0696064	0.220849	-0.205582	0.233148
196	-1.76446	0.394954	1.30324	0.503451	0.45209	-0.0377872	0.0761879	0.655731	0.302566	-0.537579	-0.297278	0.294984	1.22826	-0.428132	0.962018	0.604483	0.569252	0.264297	196	-0.0837171	-0.792933	-0.205835	-0.16889	0.203307	0.392718	-0.0569675	0.22317	-0.360947	-0.0114205	-0.0942306	-0.102562	0.443251	-0.028799	-0.590562	0.451246	-0.177469	0.171418	-0.223311	-0.588102	-0.683016	1.11114	1.12309	-0.423865	-0.331127	-0.203268	-0.182625	0.713046	-0.105658	0.187972
197	-0.777663	-0.476282	1.00782	0.127437	0.447345	0.657103	0.536713	0.710634	1.10269	-0.698551	-0.0316288	0.286687	0.0542443	-0.884104	-0.195743	0.200869	0.245977	0.272402	197	-0.106359	-0.888374	-0.000217967	-0.144141	-0.0271709	0.647379	0.387843	0.423137	-0.924865	-0.197447	0.00820017	-0.175988	0.371814	0.171722	-0.444893	0.0375481	-0.298013	-0.107354	-0.0595859	-0.187058	-0.418025	1.03792	-0.394219	-1.07911	-0.00796062	0.411758	-0.502972	0.303	0.0513884	0.703084
198	-1.3805	0.248539	0.582089	0.65311	0.242009	0.535159	0.00026379	0.82909	0.488666	-0.749275	-0.357531	0.439249	0.806384	-0.20236	0.0689759	0.391667	-0.302513	0.616158	198	-0.196564	-1.28853	-0.0568072	-0.0194507	0.0847444	0.126816	0.442595	-0.331225	-1.7024	0.038315	0.145774	0.0220896	0.14749	-0.493849	0.188635	0.514832	-0.313719	0.150756	-0.656263	-1.06295	-0.560818	0.681313	0.936766	-0.306906	-0.438053	-0.526646	0.00577377	0.0343025	-0.382177	0.289414
199	-2.15018	-0.142972	1.71778	-0.140631	0.340605	0.189186	-0.515754	0.538608	1.21871	-0.805853	-0.0312158	0.574569	0.745257	-0.518265	0.248465	0.710292	-0.0222296	0.00207121	199	-0.69248	-1.18644	-0.301076	0.0452458	-0.579241	-0.000890652	0.437334	0.0558966	-1.53191	-0.185326	0.336735	-0.0500792	0.536906	-0.450018	-0.211412	-0.257182	-0.124098	0.0946873	-0.285691	-0.617911	-0.137871	1.01449	0.820217	-1.50889	-0.118043	-0.289917	-0.135469	0.0902981	-0.0814283	0.346697
200	-1.699	-0.00267078	0.903611	0.9551	0.682142	0.0476348	-0.260601	0.571276	0.823674	-0.805561	0.265381	0.122931	1.10662	-0.580675	0.320261	0.885171	0.235319	0.265634	200	-0.772477	-1.11142	-0.0613216	-0.511634	0.155288	0.145047	0.622257	0.441039	-1.32761	-0.161619	0.0550598	-0.0254757	-0.0878285	-0.198314	0.13978	0.350648	0.171884	0.2004	-0.125292	-0.00275665	0.408713	1.10631	0.715991	-0.466166	-0.204559	-0.540955	0.613967	0.197845	0.222592	0.43489
201	-1.26499	-0.72786	0.773109	0.691543	0.501055	0.323441	0.22518	0.284734	0.59091	-0.276403	-0.125293	-0.0433701	0.55837	-1.65158	0.488008	0.239207	0.225698	0.84455	201	-0.662145	-0.981652	-0.760315	0.0675764	-0.156327	0.0274501	-0.0587696	0.220115	-0.905478	0.36483	-0.245358	0.0710831	0.0806643	-0.393587	0.0517942	-0.00152439	-0.144148	0.148689	-0.872662	-0.855248	0.389052	1.0483	0.575485	-0.940532	-0.332372	0.045551	-0.0228575	-1.00184	-0.342117	0.345213
202	-1.62464	0.21933	1.28974	0.673415	0.59871	0.398186	0.648705	0.604971	0.0627948	-0.37149	0.269648	0.689365	0.334916	-0.0691768	0.572197	0.667564	0.714822	0.49033	202	-0.361017	-1.2318	-0.278518	-0.330092	-0.0970776	-0.242313	0.415172	-0.158238	-0.987581	0.132366	0.016893	-0.0664645	-0.201221	-0.141417	-0.37068	-0.10615	-0.264773	0.165145	-0.555885	-0.375603	-0.444005	0.380641	0.0922212	-0.567695	-0.62823	0.236172	0.550554	0.249661	0.134364	0.480111
203	-2.16604	0.911695	1.1848	0.699221	0.671393	-0.0727222	0.589551	-0.157491	-0.0702366	-0.87399	0.226782	-0.0552489	0.832645	-0.808054	0.774196	1.12989	0.745115	0.825961	203	-0.275559	-1.13614	-0.463699	-0.0667362	0.207588	-0.0410896	0.444083	-0.145296	-0.20979	0.0931367	0.0404696	0.110375	-0.211875	-0.343739	0.029239	0.358968	-0.398487	0.157743	-0.322989	0.0501945	-0.548374	-0.120075	0.374708	-0.479225	-1.11063	0.605982	0.527474	0.405792	-0.181551	-0.20564
204	-1.42749	0.524709	1.38261	-0.0304012	0.405233	0.42442	0.342734	-0.098032	0.897888	-1.23116	0.213562	0.341029	0.479228	0.0576974	0.683465	0.740168	0.0457175	0.466129	204	-0.0860085	-1.27939	-0.172938	-0.304823	0.0309792	-0.0188378	0.500957	-0.0845216	-0.146205	-0.171995	0.462676	-0.295414	-0.0779917	-0.23453	0.428687	-0.255707	-0.89885	0.243048	-0.5325	-0.56091	0.563416	1.47474	0.693355	-0.752055	-0.86151	0.133591	-0.405528	-0.0403046	0.161031	0.475747
205	-1.12861	-0.120257	1.02275	0.356397	0.684873	-0.0248564	0.686652	0.045937	0.658763	-0.484997	-0.528731	0.406255	1.06499	0.383164	-0.966316	0.444975	0.468728	0.200868	205	-0.115475	-1.34042	-0.249684	-0.472251	-0.116035	0.0687777	0.418056	0.206721	-0.424064	-0.064995	-0.387445	0.184881	-0.0892086	-0.164921	-0.00567615	0.143479	-0.945352	0.0798686	-0.817823	0.532502	0.319297	0.373825	0.712093	0.639248	-0.355757	0.330798	-0.89783	1.00098	-0.179761	-0.0869018
206	-1.21218	0.020086	1.02108	0.687105	-0.232797	0.39379	0.784297	0.30917	-0.055203	-0.12248	0.175403	0.715292	1.58658	0.645047	0.778334	0.425899	0.511688	0.806665	206	-0.425584	-1.08656	-0.108428	-0.315077	0.0931062	-0.294715	0.185923	0.0177302	-0.581745	-0.0903317	-0.415797	-0.0190028	-0.223433	-0.143172	-0.13119	-0.136753	-0.298137	-0.00113034	-0.19909	-0.239427	-1.06426	0.422812	-0.414151	-0.352043	-0.0728522	-0.337207	0.136986	0.74015	-0.909274	1.3349
207	-1.0305	-0.276176	0.211315	0.19571	0.220064	0.236153	0.299575	0.461057	0.244227	-0.44196	0.283287	-0.322308	1.8568	-0.344008	-0.334181	0.508092	1.05574	0.484327	207	-0.0655041	-1.62449	0.105503	-0.0958181	0.340508	-0.426003	0.0361827	-0.125395	-1.13658	-0.314837	-0.078681	-0.061753	0.0132721	0.0587868	-0.684727	-0.52963	-0.39225	0.137212	0.161661	0.0129759	0.6299	0.813261	0.772213	-0.177721	-1.14613	-0.620732	-0.810114	0.452479	0.31469	0.987159
208	-1.07577	-0.0118249	1.38263	-0.15673	0.63529	0.263446	0.39068	-0.0929472	0.0828436	-1.07111	0.429755	-0.0230375	1.98686	-0.321556	1.16424	0.669495	0.326541	0.428528	208	-0.226638	-1.0927	-0.034355	-0.14604	-0.686823	-0.089379	0.151275	-0.28061	-1.44327	0.128515	-0.216632	-0.0558011	0.0459039	-0.604974	-0.610936	0.214934	-0.648362	0.163343	-0.529652	-0.317647	-0.347731	0.197025	1.42407	-0.658542	-0.262788	-0.642325	0.0489489	0.45805	0.342739	0.727121
209	-1.90811	0.189111	0.453263	0.318446	0.0166936	-0.573779	0.276034	0.438718	0.0993316	-0.466742	0.52512	0.374086	0.168526	-0.524146	0.0381797	0.375017	1.06164	0.800061	209	-0.256974	-1.23426	-0.192407	-0.0692763	0.0360804	0.418713	0.495338	1.00451	-1.2622	-0.0369567	-0.124392	-0.0518493	-0.0372765	-0.0808577	0.0639236	0.512492	-0.334133	0.180051	-0.850551	-0.281418	0.360167	0.283939	-0.0296347	-1.25663	-0.235809	-0.903017	-0.101593	0.690617	0.0565662	0.693553
210	-1.53617	0.0762891	1.24195	0.560099	-0.0139757	0.447777	0.422073	0.096593	0.27958	-0.711705	0.00119547	0.16917	0.155556	0.0883104	0.710625	0.768966	0.184196	-0.0795533	210	-0.148888	-1.01615	-0.0672821	-0.00456299	0.0788628	-0.122705	0.460507	0.641199	-0.820666	0.0805216	-0.0834406	-0.0428849	0.0824949	-0.180051	-0.217678	0.315297	-0.446202	0.090406	-0.75714	-0.748047	-0.290606	1.09127	0.960937	-0.306883	-0.412272	-0.232472	0.152553	-1.45195	0.895009	0.489871
211	-1.23456	0.155789	1.34578	0.519872	0.663405	0.395192	0.323294	0.11308	0.0299708	-0.919559	-0.364198	0.31355	1.54122	-0.490765	0.635466	0.618051	0.523325	0.509759	211	-0.145752	-1.32695	0.349997	-0.0707548	0.12569	0.38922	0.0584402	0.347904	-0.811556	0.102936	0.308226	-0.235942	0.299937	-0.241885	-0.117415	0.0716258	-0.286833	-0.136558	-0.330369	-0.40521	-0.513953	1.33199	-0.251291	-0.785838	-0.516445	0.0462965	0.702469	0.154016	0.0537064	0.179718
212	-1.52942	0.121905	0.639158	0.415537	0.639234	0.599061	-0.656358	1.04922	0.215687	-0.552644	-0.563925	0.622315	1.43782	-0.383159	-1.45994	0.922699	0.825778	0.232012	212	0.228755	-1.15676	0.27802	0.0189284	-0.369931	-0.237672	0.136863	0.403978	-0.479284	0.170571	-0.263579	-0.551315	0.279771	0.202797	0.00221916	0.202543	-0.548418	0.13491	-0.0998054	0.306672	0.608307	0.13616	-0.0405253	-0.0995321	-0.189621	-0.351005	-0.199151	0.335146	0.614321	0.740599
213	-1.13854	0.385094	0.842094	0.247009	0.733086	0.370568	6.14766e-05	0.275708	0.741736	-0.431953	0.102815	0.268124	0.317937	-0.615876	0.451576	0.278556	0.826437	0.569497	213	-0.353147	-1.22748	0.318898	0.109251	0.285732	0.582648	0.526587	0.30679	-0.577275	0.182301	-0.280753	-0.23494	-0.182484	0.452691	-0.373964	0.202093	-0.0661664	-0.0540635	-0.468859	0.0683416	0.197483	0.170214	0.586304	-1.08663	-0.192614	-0.789967	-0.221327	0.0263856	1.18154	0.152296
214	-0.567004	0.55038	1.01973	0.717625	0.195199	0.572642	-0.235935	-0.541728	0.651046	-0.486874	-0.413523	0.358003	1.69345	-0.288003	0.855514	0.529573	-0.476137	0.903515	214	-0.398248	-1.28369	0.183575	-0.256069	-0.279339	0.132559	0.499609	0.235162	-0.680955	0.110249	-0.402568	-0.50107	0.00623951	-0.190263	-0.00717739	-0.0544588	-0.265472	0.0629316	-0.278043	-0.547479	-0.490438	0.398745	0.396645	-0.817592	0.356759	-0.215459	0.417758	0.165555	0.661886	0.0742892
215	-0.693231	0.397798	0.703597	0.354928	0.463523	0.344794	0.502217	0.0280904	1.0359	-0.429195	-0.064156	0.875249	1.41685	0.389768	0.483617	0.0139203	0.316895	0.377392	215	0.390406	-1.09051	0.0640077	-0.278579	0.054928	-0.504995	0.409933	0.114687	-0.884177	0.0979451	0.0729854	-0.0745195	0.341805	0.0129883	-0.22159	0.406266	-0.174332	0.110517	-0.144137	-0.144733	-0.578412	0.373421	0.452454	-0.766111	-0.154742	-0.440856	-0.265138	-0.377353	0.148561	0.517362
216	-0.554714	0.770928	0.720304	0.818153	0.397758	0.39052	0.205501	0.22965	0.818468	-0.798336	-0.0920594	0.22881	0.213282	-0.171537	-0.0401764	0.349278	-0.236927	0.563529	216	-0.258103	-0.968656	0.300111	-0.246456	0.0413217	0.424896	0.2793	0.252369	-0.423115	-0.195258	0.407326	0.0875233	0.00489621	-0.0814678	0.124304	-0.285643	-0.146562	0.204657	-0.240892	-1.09678	0.0604009	0.942747	0.34161	-0.405243	-0.0687071	-1.30427	0.154665	-1.2441	0.827712	1.03965
217	-1.26757	0.914051	0.448317	0.522913	0.595674	-0.180402	-0.0823725	-0.247725	-0.0930779	-0.561186	0.111912	0.122175	1.16628	-0.0950783	-0.744388	0.713688	0.301267	0.319599	217	-0.208549	-1.18565	0.217928	-0.0636221	0.269291	0.20158	0.323915	0.128267	-0.51268	0.0203518	0.117158	0.226358	0.25335	-0.0624016	0.38539	0.307703	-0.0680276	0.37003	0.580362	-0.98367	0.556303	0.871724	0.293213	-0.67934	0.22485	-0.65986	-0.306977	-0.42987	0.184323	0.00203668
218	-2.05795	0.397203	1.20001	0.773616	0.0453641	0.250717	0.614642	0.633446	0.870061	-0.667541	-0.135982	0.81506	1.24802	-0.474444	0.448135	0.428247	0.0326898	0.543521	218	0.0860503	-1.08138	-0.313865	-0.0213721	-0.516177	-0.181067	0.432524	0.33074	-0.373211	-0.397012	0.171105	0.173633	0.0714293	-0.259927	0.430503	0.172153	-0.348447	-0.234804	-0.245025	-0.482143	0.700249	0.434081	-0.0396789	0.221304	-0.0935883	-0.898734	0.48952	0.635024	0.72151	0.304883
219	-0.912543	0.617687	0.800852	0.69872	0.510568	-0.084946	0.640002	0.313811	-0.258705	-0.571028	-0.328977	0.868623	1.16271	-0.26593	0.0226474	-0.061319	0.982841	-0.15915	219	-0.0692853	-1.44971	-0.186233	0.00716215	-0.144118	-0.296321	0.0954337	0.0495684	-0.502673	0.0922003	-0.0783929	0.372383	0.210282	-0.342498	-0.116243	-0.0181012	-0.145206	0.200332	-0.00919176	-0.283327	0.0885613	0.991858	1.38453	-0.824354	-0.407484	-0.0959558	-0.108862	0.693159	0.5446	0.268645
220	-0.890889	0.685234	0.910812	0.131852	0.456429	-0.346669	0.466805	0.113207	-0.11698	-0.630004	0.0358749	0.462711	0.624013	-0.487936	0.158339	0.236294	0.492042	0.935773	220	-0.0475635	-1.0783	0.00601282	-0.575731	-0.390538	-0.22232	-0.0355814	-0.0994487	-0.36934	0.532812	-0.131324	0.0461424	0.264317	0.0736251	0.106333	-0.0904037	-0.278554	-0.0139373	-0.31539	-0.345889	-0.0213056	0.883731	0.607098	-0.395693	0.039948	-0.377657	0.676279	0.00389892	-0.00538165	0.324918
221	-1.45519	0.0836389	0.856643	0.337324	0.540652	-0.241456	0.343926	0.130145	0.587163	-1.09676	0.253536	0.114662	1.21342	0.032147	-0.843002	1.0317	0.998739	0.643426	221	-0.133306	-1.25804	-0.204153	-0.00347885	-0.274064	0.103893	0.0628288	-0.531076	-0.358475	0.383294	0.0871064	-0.276835	0.440665	0.177107	-0.119888	-0.513857	-0.16437	0.200834	-0.152029	-0.757888	0.318255	0.0828142	0.562435	-1.09455	0.0567621	-0.552491	-0.429919	0.4251	0.0577415	-0.00250676
222	-1.49168	-0.121567	1.50848	0.422114	0.899556	-0.106211	0.745827	0.279242	0.572977	-1.18148	-0.0028836	0.934561	0.851868	-0.0857648	-0.326608	0.909065	0.355644	0.853268	222	-0.320375	-1.34385	-0.257268	0.10107	0.0179992	0.185424	0.329202	-0.427555	-0.522325	-0.20747	0.120768	-0.0222901	0.016048	-0.510045	-0.452366	-0.339725	-0.587105	0.0686328	-0.193556	-0.656783	0.639925	0.678951	0.47401	-1.00218	-0.0228699	0.20967	-0.7134	0.435708	-0.280438	0.566512
223	-0.780563	0.648491	0.153788	0.747527	-0.306182	0.219833	0.0642704	0.195857	0.408379	-0.4495	-0.919697	0.604853	1.58698	-0.191364	-0.370846	0.743186	0.10726	0.575429	223	-0.341448	-1.28442	-0.0818394	0.143432	0.100353	0.353397	0.572012	-0.207633	-0.695341	-0.0184132	-0.161916	0.0884743	-0.0630851	-0.329033	0.22774	-0.526997	0.0969802	0.142743	0.252771	-0.364806	0.356948	0.986613	0.794852	-0.561515	-0.487528	-0.504252	0.540483	-0.593643	0.282225	0.429686
224	-1.71585	0.728157	1.16582	0.59807	0.0711786	-0.0584367	0.495431	0.00270529	0.676303	-0.503592	-0.252191	0.285224	0.932704	-0.232317	-0.112793	0.606314	0.325182	0.322259	224	-0.198291	-1.07069	-0.282425	-0.141186	0.0609421	0.330229	0.514	-0.177432	-0.476558	-0.0771559	-0.0429443	0.0700852	0.163339	0.159813	-0.00324359	0.251947	-0.102666	0.0926591	-0.0560133	-0.78286	0.338157	0.711743	1.01897	0.00891337	0.342261	-0.0423621	0.422398	0.399658	0.743751	-0.0639878
225	-1.59678	-0.0473336	1.15444	0.386665	0.073465	-0.710662	0.273744	0.661725	0.487644	-0.673575	0.152021	-0.109248	0.744413	-0.621096	-0.141299	0.731946	0.77495	1.35451	225	-0.283438	-1.00446	-0.0996841	0.049487	-0.394865	0.230907	-0.00787607	0.233082	-1.01363	-0.140127	0.191268	0.0272448	-0.201553	-0.342753	0.093262	0.259159	-0.447154	0.197136	0.569505	-0.390515	-0.480064	-0.281755	0.0331067	-0.766569	-0.983333	-0.138631	0.443017	0.738477	0.45668	0.503406
226	-0.934753	0.745052	0.783089	0.146419	0.523745	0.376111	-0.642497	0.440556	0.689097	-0.582776	-0.196435	0.287139	1.11638	-1.15099	-0.807612	0.679417	0.957203	0.0709789	226	0.132649	-1.19958	-0.270779	0.169086	-0.541997	0.0472849	-0.0364766	0.104787	-0.585329	-0.0328959	0.00555176	0.168997	-0.0612605	0.0500784	-0.317513	0.0317606	-0.0210403	0.0700171	0.191827	-0.585911	0.353945	-0.0970252	0.169478	-0.500972	-0.507523	0.0166804	0.0524982	0.966755	0.500846	0.561008
227	-1.54951	0.0194482	0.151572	-0.0381612	0.694866	0.21302	0.243231	-0.333711	1.03606	-0.412543	-0.264524	0.755269	1.32284	-0.286348	-0.291157	0.343255	0.557052	0.719149	227	-0.0654923	-0.802298	-0.194224	0.201629	0.0292409	-0.0185885	0.308181	0.0434265	-0.28122	0.366773	0.120225	-0.194151	0.0483442	-0.0533698	0.242867	0.192844	-0.2985	0.0618461	0.355774	0.821495	0.233522	0.599717	0.46499	-0.802735	-0.509528	0.049576	0.239867	-0.419693	0.859868	1.08837
228	-0.834264	0.0130798	-0.184447	0.199454	0.771655	-0.028061	-0.193672	0.626818	0.518095	-0.66398	-0.0594536	0.903667	0.81914	-0.384022	-0.650821	0.0483614	0.73918	0.881195	228	-0.195248	-1.18442	0.107746	-0.0479307	-0.234872	0.235527	0.525733	-0.0640738	-0.276282	-0.137027	-0.00241928	-0.0638325	-0.629079	-0.33513	0.180291	0.0739154	-0.12855	0.34353	0.0463361	0.421953	-0.0444309	0.476681	0.369515	-0.510786	0.144501	0.174777	0.136227	-0.288182	-0.0804752	0.831113
229	-0.569532	0.688927	0.325659	0.183996	0.226277	0.0387215	0.250046	0.297341	-0.183532	-0.827841	0.690712	0.115234	0.748659	-0.0848941	-0.0776568	0.0445054	0.356003	0.324266	229	-0.110986	-1.35221	-0.190476	-0.107646	-0.025166	0.356977	0.301099	-0.338058	-0.0940885	-0.0577614	0.314537	-0.0446726	-0.0734222	0.345583	-0.0199172	0.435447	0.0543033	0.279307	0.656803	-0.0744775	0.0558766	0.248126	0.384758	-0.0662912	-0.671172	-0.119911	-0.141889	-0.706692	0.616136	0.671279
230	-0.432963	0.745559	0.771404	-0.0624119	0.362985	-0.431727	-0.0879435	0.143477	1.01496	-0.56579	0.0878967	0.366581	0.594433	-0.692946	-0.349352	1.36702	0.405724	0.673506	230	-0.280952	-1.56573	-0.143903	0.0362105	-0.306367	-0.109642	0.29165	0.288933	-0.557487	-0.0627549	0.0187669	0.131917	-0.0293201	0.446446	0.146025	0.109036	-0.343412	0.494154	-0.487286	0.0476604	0.406139	0.348679	0.121303	-0.289212	0.224572	-0.249716	0.276074	0.637393	-0.316754	0.418935
231	-0.488832	0.155958	0.604754	-0.0737804	-0.0403265	0.282885	-0.311182	-0.140358	0.475255	-0.456336	-0.659932	0.396386	1.07413	0.150837	-1.11511	0.566078	0.114859	0.400129	231	-0.00496656	-1.20988	-0.456611	0.229496	-0.154694	0.329897	0.162346	0.145736	-0.812804	-0.0962621	-0.0385928	-0.0612553	-0.0413112	-0.0993577	0.0712379	0.481373	-0.0185468	0.182355	-0.600456	-0.0114372	0.297486	-0.134481	0.752537	-0.231496	-0.898623	-0.227647	0.196737	0.0684503	0.12494	0.9136
232	-0.590808	0.223547	0.962999	-0.225281	0.188033	0.26077	0.0268297	0.121048	-0.170682	-1.04234	-0.120248	0.755309	1.42564	0.00113631	0.303672	0.321529	1.41473	0.203408	232	-0.301939	-1.1429	-0.204763	0.250006	-0.0228374	-0.263707	0.352636	-0.12651	-0.6824	0.021905	0.0196129	0.00193496	-0.143242	0.0937895	-0.042272	-0.0932676	0.226468	-0.104862	-0.571204	-0.515479	-0.182044	0.0142802	0.272992	-0.775674	-0.374558	-0.340512	0.0332365	0.244533	0.189669	0.426056
233	-1.63667	0.151107	0.784873	0.231649	0.174541	0.460474	0.216886	0.182981	0.711057	-0.425275	0.212724	0.235036	0.288412	-0.0469553	-0.18503	0.419874	0.800144	0.0362173	233	-0.372152	-1.14054	-0.130756	0.175869	-0.0989954	0.0971226	0.290402	-0.311373	-1.42001	0.456282	0.132948	0.16903	0.113631	0.0105954	0.652309	0.210112	0.183155	0.28491	-0.0144612	-0.843272	0.0648976	0.333442	-0.34178	-0.360089	-1.03363	0.0485242	-0.115914	0.358853	0.621321	0.538094
234	-0.798835	0.42571	0.163062	0.137698	0.539479	0.330107	-0.209958	0.180286	-0.0550088	-0.748045	-0.773594	-0.20486	0.784995	0.0122918	-0.689272	0.414849	0.53088	0.916626	234	-0.0596497	-1.0143	-0.541117	0.0660905	-0.296771	-0.614281	0.202377	0.190227	-1.76332	-0.00477492	0.081684	0.277785	0.11064	0.291196	-0.581537	-0.163776	0.0344829	0.288829	0.312532	-0.0518816	0.528681	1.03814	0.78735	-0.287643	-0.264989	-0.133299	0.393338	-0.596213	0.679914	0.310468
235	-0.821965	0.505791	0.515471	0.0344256	0.465278	0.290962	-0.0553879	-0.127882	0.376836	-0.384199	0.0962369	0.505314	0.416612	-0.601822	-1.08649	1.0287	0.71037	0.612958	235	0.104869	-0.978371	-0.0578663	0.0391675	0.120265	-0.411273	0.0440827	0.437245	-1.03379	0.104005	0.355593	-0.342296	-0.191722	0.1405	0.412791	0.613794	-0.0527891	0.0126299	0.143016	-0.0583393	0.181573	0.527816	0.586863	-0.0267983	-0.320077	-0.328197	0.0913206	-0.536848	0.675884	-0.313239
236	-1.70872	0.783216	0.114854	0.494481	0.410428	0.00878023	-0.691682	0.14078	0.118568	-0.0512084	-0.00107476	0.396622	2.36988	-2.39555	0.96046	0.241017	0.579376	0.596903	236	0.112043	-1.51812	-0.338387	-0.232059	0.0458978	-0.500768	0.123976	-0.0340439	-1.18842	0.120707	0.341804	-0.149557	-0.093701	0.296148	-0.0675927	0.0511391	-0.272514	-0.25831	-0.559644	-0.352702	0.82539	0.0547063	0.66152	0.76094	-0.0251407	-0.674076	-0.276367	0.425359	1.13239	0.0165059
237	-1.84677	0.3805	1.23555	0.528274	-0.162761	0.17194	0.0448821	0.31421	0.0234413	-0.448044	0.529252	0.132641	1.29752	-0.719782	0.105757	-0.0158972	-0.125418	0.842292	237	0.0406389	-1.17535	-0.162396	-0.249338	-0.226485	0.387947	0.579041	0.110949	-0.7597	0.147264	0.0916328	-0.150352	0.139577	0.310901	-0.311287	-0.14224	0.024032	0.104735	-0.582601	-0.49432	-0.43127	0.532238	0.449697	-0.257886	-0.604844	-0.286233	0.144141	-0.106292	0.330151	0.59925
238	-1.34555	0.164503	0.420741	0.241103	0.719712	0.0624913	-0.0681092	0.0271641	0.187066	-0.705495	-0.461068	-0.175307	0.5819	0.280528	0.3346	0.670149	0.511562	-0.198658	238	0.0820545	-1.29729	0.0532636	-0.495943	-0.670915	-0.00613822	0.216232	0.16492	-1.02366	-0.12831	0.0516776	-0.0876929	0.0232042	0.261057	-0.126228	0.145425	-0.102234	-0.0927454	0.130169	-0.0653724	0.0335485	0.522969	0.132174	-0.0147059	-0.0660022	-0.228692	0.343889	-0.160724	0.126961	-0.879464
239	-1.41383	0.250726	0.629174	0.0424468	0.00673376	0.17668	0.417508	0.0689982	1.15539	-0.424175	-0.22441	0.359591	0.557472	-0.783648	0.545004	0.625038	-0.0152239	1.26483	239	0.280594	-1.31836	-0.0950207	0.191575	-0.00195393	0.340031	0.45957	0.270857	-0.612713	0.161351	0.0557977	0.36587	0.0814747	-0.188691	-0.173496	0.279294	-0.222747	0.137717	0.210126	-0.873316	0.411187	0.684155	1.07512	-0.031279	-0.351561	0.364505	-0.291261	-0.0962305	0.646234	0.393503
240	-1.23467	0.398083	0.747935	0.471777	-0.0300094	0.412675	-0.674569	0.192116	0.416798	-0.508207	0.344676	1.01023	0.396584	-1.70911	-0.579352	0.306027	0.149246	0.211456	240	0.249144	-1.36409	-0.407962	-0.37629	-0.136246	-0.230741	0.756135	-0.091441	-0.715914	-0.0250671	0.192588	0.0211887	-0.110363	0.511637	-0.0422555	0.109594	-0.454576	-0.231586	-0.600446	-1.24429	0.976145	0.540911	-0.239646	-0.436546	-0.162942	0.136687	0.125398	1.03138	0.570988	0.659567
241	-1.16155	-0.199694	0.604042	0.743901	0.186231	-0.24917	0.300109	0.0680592	0.327474	-0.110761	0.425928	-0.205302	1.60551	-0.149661	-0.0286576	0.699847	0.445468	0.259398	241	0.384496	-1.09509	-0.0530343	0.412055	-0.0930118	-0.70901	0.467468	0.100434	-0.58604	0.0719473	0.288938	-0.212329	0.438572	-0.135787	-0.399155	0.633106	-0.52619	0.130684	-0.194653	-0.47484	0.345711	0.267662	0.918295	-0.56043	-0.234217	0.183697	-0.14242	0.192033	0.16671	0.594916
242	-1.22541	0.315622	0.107475	0.323839	0.00841392	-0.0924771	0.0231902	-0.0421398	0.502546	-0.742155	-0.291233	0.216516	1.41779	-0.691804	0.17903	0.423791	0.201794	0.535719	242	0.0113973	-1.48098	-0.0265243	-0.124975	-0.109194	0.398538	0.563835	-0.315901	-0.793998	-0.124773	0.0109519	0.0725512	-0.316297	0.135769	0.189806	0.307621	-0.344873	0.368071	-0.474364	-0.305199	0.0135877	0.240359	0.277624	0.274517	-0.642478	0.467981	0.24656	0.355639	1.33736	0.580184
243	-0.953873	0.875304	0.339375	0.0588238	0.00798748	-0.0906363	0.399216	-0.385137	0.665079	-0.0295477	-1.23752	-0.227456	1.19436	-0.545865	0.231098	0.691069	-0.298545	0.451525	243	-0.101272	-1.42476	-0.322761	0.00587815	-0.305456	0.0408097	0.551737	0.0419824	-1.36162	-0.0753289	0.533461	0.0403926	-0.427592	0.0946491	-0.231737	0.0911524	-0.119497	0.393653	-0.320684	0.604877	0.0962881	0.845489	0.96079	-0.538246	0.117598	-0.123136	-0.081905	0.0473609	0.624373	0.702501
244	-1.02139	0.537581	0.502066	-0.205623	0.12871	-0.0109207	0.0968324	0.136911	0.507979	-0.862436	0.109529	0.210977	0.492122	-1.0196	0.69569	0.408016	-0.112718	0.646768	244	0.00427637	-1.2006	0.162125	0.122572	-0.0459655	0.0655328	0.863497	-0.0995087	-0.878454	0.0128563	0.388145	0.0515825	0.126533	0.375919	-0.325308	0.161295	-0.391254	0.298647	-0.278375	-0.630911	-0.0711281	1.12283	0.918173	0.243028	-0.726276	0.452401	-0.418006	-0.98115	0.687113	0.52323
245	-0.537733	0.742667	0.352883	0.54253	0.449502	0.431037	0.553301	0.27491	0.826086	0.17405	0.367237	0.610979	1.2876	0.570372	-0.736624	0.31242	0.00367911	1.30649	245	0.508607	-1.40838	-0.0405119	-0.31866	-0.0702992	-0.21583	1.0113	0.0581992	-0.770463	0.0913475	0.259895	-0.0733835	0.0250575	0.0900265	0.109984	0.320831	-0.430475	0.185131	-0.200979	-0.650989	-0.0932284	0.679543	-0.378756	-0.444318	-0.0418221	-0.0314489	-0.16331	-0.362553	0.92906	0.381234
246	-0.513702	0.785728	0.531363	0.00956849	0.54932	0.149937	0.00480177	-0.00340606	1.08598	-0.92018	0.259681	0.33901	0.27808	-0.145265	-0.214481	0.026046	-0.18635	0.77709	246	0.0639137	-1.53105	-0.0236936	-0.118674	0.230904	-0.245937	0.783227	-0.260395	-0.870767	-0.23865	-0.094394	-0.233237	-0.243764	0.01086	0.27222	0.0705423	-0.0881124	0.267649	-0.305522	0.0631823	0.642803	1.09462	0.669333	-0.331506	-0.198719	-0.217613	0.50286	-0.306328	0.654631	-0.171492
247	-1.08942	0.282037	0.939118	0.416335	0.489812	-0.121727	-0.0651793	0.0050724	0.564468	-0.245283	0.620768	0.477744	-0.215778	-0.400009	0.474925	0.648371	0.162563	0.133566	247	0.298755	-1.10815	-0.0772711	-0.227162	-0.0546412	-0.040175	0.749412	0.0500345	-0.864119	0.259864	-0.248437	-0.246458	0.356003	0.28911	-0.0612579	0.0696704	-0.108461	0.206313	-0.323792	-0.549765	0.040906	-0.10658	0.740556	-0.0800896	0.57126	-0.35939	0.0675842	0.00109944	-0.500354	0.635976
248	-2.07758	0.0148262	0.11184	0.0216909	0.435834	-0.03879	-0.449699	0.687883	0.874611	-0.192063	0.306267	0.2915	0.610562	0.289432	0.254865	0.238335	-0.550236	-0.15953	248	0.0552761	-1.10519	-0.14606	0.348717	-0.224895	-0.140434	0.899849	-0.0951741	-0.484477	-0.0673731	-0.0385187	-0.364542	0.189201	-0.115159	-0.035424	0.060317	-0.273987	0.503903	-0.215016	-0.4134	0.399802	0.751601	0.439731	0.324922	0.045676	-0.214947	-0.772525	0.29912	-0.0818596	0.119466
249	-2.06606	0.541016	0.496764	-0.0434025	0.109974	0.0396139	0.175664	-0.182797	0.382492	-0.623115	0.111055	0.444464	0.303435	0.0576346	0.368674	0.448623	0.867187	0.377705	249	-0.15896	-1.12121	0.0156577	0.24998	0.0113723	0.46518	0.883586	-0.116932	-0.256612	0.261542	0.062549	-0.160499	0.0432621	0.0383815	-0.337022	0.284163	-0.477063	0.516329	-0.335925	-0.357343	-0.266853	1.41597	0.940383	0.376119	-0.0850087	-0.131486	-0.143571	0.31266	-0.450213	-0.0358619
250	-1.69874	0.938839	0.417213	-0.0404309	0.330499	0.359559	-0.977975	-0.332397	0.64837	-0.584354	0.181818	0.697382	1.2984	-0.135705	-0.184252	0.00236151	0.366246	-0.0551165	250	0.143386	-1.21852	0.12662	0.452361	-0.00882633	0.233994	0.540354	-0.0749013	-0.698417	-0.0673192	0.00134501	0.215144	-0.0630523	-0.236075	0.163638	-0.190129	-0.303156	0.14065	-0.207849	-0.41811	0.53901	-0.185603	-0.667028	-0.0461003	0.0290611	0.551815	-0.230594	-0.334627	-0.148721	0.133677
251	-0.371189	0.753969	1.1288	0.189247	0.333973	-0.144971	-0.049267	0.0351814	0.310123	-0.268169	0.356773	0.743714	0.990503	-0.0851681	-0.0661988	0.263782	0.114507	0.435851	251	0.190869	-1.34808	-0.38518	0.289004	0.204314	-0.0705659	0.467209	-0.669634	-0.584257	0.335749	0.126328	-0.160655	-0.318218	-0.00748276	-0.00772432	-0.120869	-0.740887	0.228377	0.0336036	0.422814	-1.00986	0.22019	1.02665	0.441502	-0.284703	-0.161773	-0.220086	0.588804	0.439334	1.31865
252	-0.362276	0.871402	0.875188	0.0982421	0.0285997	0.17502	0.464327	-0.254203	0.414363	-0.243925	0.215696	0.2042	-0.220983	-0.785857	0.141066	0.567466	-0.127086	0.0381239	252	0.0949005	-0.886726	-0.341561	0.161215	-0.0371234	0.212242	0.819445	-0.796842	-0.425661	-0.278848	-0.0181341	-0.0247933	-0.0515307	0.188668	0.592539	-0.120964	0.0675836	0.128036	0.470956	-0.057415	0.32975	-0.121977	-0.38259	-0.178152	-0.547069	-0.412857	0.0111789	-0.103043	0.570522	0.221135
253	-0.0550245	-0.133845	1.83813	0.274959	0.0915439	0.236348	0.289214	0.210961	0.240968	-0.255162	0.167766	0.231497	1.23097	-0.309352	0.616969	-0.168541	0.752418	0.277784	253	1.43357	-1.26499	-0.169161	-0.0418148	-0.0376183	0.292604	0.419084	-0.420866	-0.546939	-0.277994	0.0638367	0.488158	-0.155107	-0.0907881	-0.0774036	0.368206	-0.0383308	-0.0606536	-0.506774	0.135233	-0.556463	0.49156	1.13851	-0.707963	-0.603925	-0.294425	0.0589448	-0.153876	0.696616	0.500198
254	-1.11542	0.518097	0.606517	0.193057	0.269678	-0.129807	0.339845	0.0562631	0.795118	-0.226412	0.592553	0.47081	0.392439	0.145387	-0.0113744	-0.0295869	0.496303	0.828131	254	1.70244	-1.15116	-0.228968	-0.163638	0.275623	0.457632	0.530562	-0.601803	-0.980864	0.320477	0.217532	0.464682	-0.106958	0.000418948	0.445235	-0.0560371	-0.488816	0.451503	0.0160625	-0.725445	0.0948387	0.621735	-0.104649	-0.391615	-0.957414	0.130157	0.187336	-2.15183	0.954944	0.545638
255	-0.963629	0.556427	1.10204	0.429236	0.317865	0.148232	0.209592	-0.255942	0.578847	-0.683206	0.0830507	0.414031	1.06526	0.157365	-0.3043	-0.00479255	0.303835	0.111281	255	1.37885	-1.13363	-0.551548	0.524727	-0.0402688	0.181295	0.266137	-0.284037	-0.496843	-0.0326949	0.346794	0.280608	-0.279321	-0.437828	0.204098	-0.292625	-0.0740509	0.14415	-0.643927	0.0509585	0.424356	0.620179	0.411402	0.158973	-0.403773	-0.107952	-0.218573	-1.40041	-0.0186281	0.14226
256	0.316736	0.551677	0.539205	0.0912857	0.127155	-0.0292418	0.10692	0.351277	0.272037	-0.828361	0.147236	-0.395017	0.781476	0.236235	-0.00578473	0.31846	0.577643	0.254592	256	0.946234	-1.11187	-0.315503	-0.098573	-0.0164501	0.110345	0.355213	0.068137	-0.382072	-0.0299956	0.129354	-0.104199	0.301826	-0.0501713	-0.420169	-0.0532264	0.0604844	0.239577	-1.72565	-0.000527562	-0.0899569	0.0819751	0.6275	-0.603652	-0.0360593	0.272657	0.0612002	-0.000665498	0.459087	-0.156445
257	0.392101	-0.247054	1.03642	0.461085	0.114455	-0.298951	0.109321	0.890672	-0.330742	-0.656548	0.218347	0.787571	1.12643	-0.685038	-0.0567147	0.568796	0.754044	0.405716	257	1.13214	-1.26314	-0.109986	-0.242343	-0.231614	0.0089747	0.185855	-0.210665	-0.266585	0.0515426	0.283484	0.269248	-0.275792	-0.016869	0.1712	0.206236	-0.20879	0.618842	-0.474728	-0.654236	-0.39324	0.991244	-0.69004	0.360467	-0.448067	-0.134605	0.408137	0.233937	0.592192	0.709705
258	-0.162287	0.26378	0.569161	0.0351135	0.215694	-0.131396	-0.266175	-0.0944899	-1.1049	-0.736694	0.548287	0.74383	0.835393	-0.079573	0.0991918	-0.04586	0.0133188	-0.471646	258	1.02036	-1.08692	-0.350909	0.34617	0.0454848	0.142787	0.723819	-0.211479	-0.35966	-0.106654	0.203158	-0.243745	-0.0719263	0.070555	0.00741686	0.577858	-0.0875108	0.28309	-0.28263	-0.189538	0.214196	0.13768	0.0702244	0.254427	0.436282	0.0345103	0.0421707	-1.16345	1.21718	0.315128
259	-0.61155	0.155191	0.801514	0.178011	0.195354	0.0643039	0.0107961	0.177984	-0.304241	0.0315998	-0.858942	0.364447	1.34411	0.531795	-0.189437	0.0494972	0.0760313	0.465546	259	0.660767	-1.26299	0.0324906	0.320839	0.178471	0.0510905	0.359904	0.139861	-0.0339575	-0.151595	0.247039	0.181723	-0.249128	-0.0465183	-0.487458	-0.0405569	-0.43351	0.150996	-0.253324	-0.354834	0.273609	0.352353	0.0466203	-0.0128398	0.191239	-0.207167	-0.553055	-0.109581	0.671632	0.0258653
260	-0.542397	0.16559	0.546675	0.425343	0.193557	-0.115817	-0.0295819	0.0145861	-0.433981	-0.538665	0.209818	-0.217929	0.769729	-0.460106	-0.15652	0.838778	0.504081	0.269098	260	0.700019	-1.17477	-0.499285	0.0774307	-0.274918	0.0721804	0.0157185	0.0166188	-0.318324	-0.0783878	0.169305	0.0360546	-0.166546	0.215313	-0.0642046	0.0370356	-0.517909	0.271321	-0.635517	0.228962	0.0671994	0.791457	0.505856	-0.173622	-0.0485601	-0.0968268	-0.0552386	-1.04987	0.532995	0.50577
261	-0.812093	0.512323	1.07699	0.201441	0.313667	0.215957	0.142742	-0.204568	-0.0798855	-0.476173	0.109683	0.46651	1.24838	0.406496	0.170268	0.0253502	-0.01907	0.741224	261	0.300028	-1.28623	-0.355884	-0.0787769	-0.349404	0.0756441	0.281452	-0.668251	-0.482038	-0.149399	0.208503	0.0719866	0.241837	0.0255398	-0.380881	-0.173537	-0.442402	0.496845	0.200394	-0.3281	0.435048	0.298179	0.0666523	0.444215	0.0643912	0.377008	-0.24141	-0.918117	1.28931	0.973032
262	0.0273	0.283212	0.580635	-0.0115206	0.293682	0.127565	-0.184249	0.223143	-0.206495	-0.479267	-1.02722	0.526702	0.837253	-0.235261	-0.0202428	-0.0821914	0.285533	0.106361	262	0.421333	-1.46176	-0.0683344	-0.0148206	-0.0827618	0.122159	0.386755	0.0591441	-0.317105	-0.152245	0.0444303	-0.0443128	-0.33051	-0.0444076	-0.0914544	0.585481	-0.179897	0.0112497	0.172475	0.176725	0.640563	0.801305	-0.66423	-0.302661	0.353065	-0.249919	-0.0838146	0.514375	0.534593	0.671829
263	0.153354	0.495146	0.749172	0.252518	0.520304	0.0736691	0.174791	-0.535146	-0.0538658	-0.692451	0.226336	0.0578726	0.611271	-0.104067	-0.581617	0.0899542	0.0981229	0.502516	263	0.389859	-1.19124	0.284842	0.165349	-0.176901	0.0637768	0.249605	-0.291116	-0.486847	-0.0384475	0.581942	-0.115579	-0.473677	-0.0855976	-0.364644	0.0728567	-0.269373	0.155975	-0.166033	-0.115818	-0.575064	0.217128	0.344892	-0.169227	0.429491	-0.083789	-0.313732	0.358865	0.439503	0.404404
264	-1.69351	-0.0223656	1.33603	0.525894	0.388141	0.140221	-0.276667	-0.509757	0.430331	0.0678343	0.194523	0.182079	0.255279	-0.708815	1.03025	0.336819	-0.223353	-0.127182	264	0.433841	-1.3609	0.0940468	0.246134	0.0934362	0.201595	0.210817	0.0309729	-0.339054	-0.144418	0.181052	-0.150344	-0.000520301	0.119155	-0.0662017	-0.0851055	-0.444402	-0.0289813	-0.386162	-0.120628	0.100899	0.277306	0.386811	0.100073	-0.164467	0.362674	-0.648113	-1.05385	0.562087	-0.322192
265	-0.570158	-0.171419	0.488313	0.30024	0.628419	0.360614	-0.159045	-0.303768	0.202332	-0.0887866	0.434465	0.439358	-0.122872	-0.276493	-0.0893225	-0.329587	0.766112	0.464873	265	0.581152	-1.38382	0.646211	0.0161884	-0.875778	0.314359	0.113429	-0.15667	-0.422765	0.264402	-0.479472	-0.181325	-0.255737	0.0684316	-0.131105	-0.5122	-0.640792	0.537292	0.958314	-0.342302	0.80741	0.868576	0.578788	0.248031	-0.247054	-0.0687836	0.213875	-0.693846	0.627151	-0.485509
266	-0.546277	0.208973	0.694708	0.0840568	0.296496	0.0459841	0.0522772	0.126017	0.506061	-0.4888	-0.336464	0.557085	1.13373	-0.24415	-0.203114	0.526627	0.563299	0.318765	266	0.723276	-1.13499	0.313359	0.18617	-0.0143429	0.249905	-1.21787	0.146194	-0.321021	0.0820964	-0.577282	0.118282	-0.102039	0.16082	-0.151361	0.00400477	-0.253411	0.0782788	0.104397	-0.686531	1.4756	-0.555846	0.292271	-0.0415313	0.393772	0.807723	0.185937	0.296269	1.00693	0.170998
267	-0.835642	-0.0368639	0.655473	-0.264478	0.519539	0.515511	-0.567538	-0.0356738	0.128405	-0.14764	-0.39804	0.847744	0.614442	-0.0741981	0.116077	-0.00911269	0.243327	0.0595803	267	0.129783	-1.32385	0.328771	-0.0776498	-0.280128	0.245434	0.446595	0.170933	-0.311472	-0.0340307	-0.213805	-0.145797	-0.0827727	0.0175154	-0.127234	0.303861	-0.0369511	0.202211	0.693671	-0.761186	0.78678	0.678721	0.318582	-0.0632714	0.156895	-0.240316	0.500744	0.345192	-0.808207	0.731633
268	-1.41923	-0.317314	0.25287	-0.0486683	0.075139	0.224493	-0.383097	0.26181	0.32953	-0.585245	0.243487	0.195376	0.592896	-0.101079	0.0861197	0.115187	0.102751	0.169434	268	0.180311	-1.17801	0.240886	0.140763	-0.405031	-0.194597	0.487163	-0.0351091	0.0480664	0.0219502	-0.137835	-0.132021	-0.0981564	0.378248	0.359658	0.0698827	-0.692254	0.351477	0.568286	-0.531652	-0.600019	0.582673	-1.15291	0.609821	-0.063593	-0.0325895	-0.568923	-0.484002	0.0276359	0.863873
269	-1.27824	0.221285	0.899213	0.00724706	0.105787	0.495605	0.0588165	-0.31076	-0.290491	-0.227554	0.924055	0.0589881	0.741957	0.191435	0.619376	1.04842	-0.0882455	0.43688	269	0.133874	-1.41622	-0.00612469	-0.259805	-0.330157	0.0771963	0.0570541	0.288484	0.0637453	-0.0281192	-0.0577967	-0.0691565	0.107923	-0.0605401	0.149062	0.355616	-0.549342	-0.16999	0.0271016	0.199855	0.532822	0.0945215	0.805921	-0.0205658	0.0526324	-0.111026	1.28525	-0.720134	0.17542	0.483268
270	-1.02089	0.0661724	0.352313	0.222476	0.0412329	-0.111493	0.0582796	-0.604482	-0.13745	-0.513755	0.0112015	0.0392697	0.57227	-0.644779	-1.11777	-0.194467	0.126895	0.575411	270	0.30425	-1.54546	0.669247	0.271255	-0.0781904	0.0603377	0.366653	-0.00397041	-0.546295	0.0271327	0.169845	0.0573273	-0.375354	0.0478189	0.404235	0.0345237	-0.550392	-0.0514499	0.192378	-0.15996	0.415332	0.654033	0.199109	-1.16967	-0.340432	0.588328	0.259168	0.534648	0.474455	0.153431
271	-0.816498	0.29035	0.75805	-0.0997556	0.407942	-0.19114	-0.145124	-0.253995	0.331536	-0.153347	0.059865	0.0598407	0.865787	-0.472364	-0.0548016	-0.0277457	-0.23527	0.806084	271	0.18307	-0.966265	-0.0534661	-0.0459361	-0.473671	0.189528	0.415787	0.316075	-0.365897	0.0307622	-0.151397	-0.0296587	-0.0364988	-0.0555478	0.235631	0.438488	-0.526919	0.444953	-0.778383	-0.970532	0.0184261	0.21732	1.24209	-0.92476	0.376697	-0.116051	0.361802	0.517348	-0.190373	0.209691
272	-1.0351	0.30631	1.00659	0.0991753	0.764936	0.097646	0.116553	-0.424875	0.283401	-0.0237393	0.526793	0.333397	1.59912	-0.425927	0.314947	0.461335	0.168716	0.15236	272	0.387682	-1.09997	0.25986	0.00289137	-0.239325	-0.320963	0.317614	0.327578	-0.227569	0.143212	-0.18275	0.0985494	0.0792594	-0.17804	-0.163588	0.0424792	-0.752092	-0.062488	-0.169845	-0.234793	0.0276852	0.750407	0.450226	-0.534837	-0.0342813	0.127773	0.397893	-0.0665444	0.542463	0.597232
273	-0.801724	0.296745	0.172492	-0.649524	0.266285	0.0918465	0.00359947	0.191247	0.652227	-0.508841	0.114744	0.187594	0.330717	-0.306481	0.149098	0.699349	-0.0132371	-0.302443	273	0.152796	-1.35406	-0.275947	0.246812	-0.413115	-0.251147	-0.0039852	0.321445	-0.101392	-0.0516128	-0.0466686	-0.358739	0.328072	-0.147514	0.37502	-0.0109467	-0.618139	-0.0330214	-0.898691	0.0109417	-0.00035442	1.1629	0.744617	-0.00493074	-0.2834	0.307163	-0.142495	-0.203092	-0.800645	-0.592832
274	-0.513357	0.322375	1.05837	0.0903763	0.423015	0.119876	-0.764268	0.383535	0.356672	-0.0389474	-0.815588	0.0318004	0.615978	-0.850427	-0.177953	-0.52966	0.420609	0.246999	274	-0.0387131	-1.06142	0.407651	-0.236897	0.0310428	0.182633	0.483248	0.502284	-0.27232	-0.211679	-0.081696	-0.221092	0.353384	-0.433319	-0.11708	0.301529	-0.456169	0.170972	0.0215463	0.357825	0.959545	0.0107947	0.317675	0.670067	0.013704	-0.325199	0.306331	-1.34011	-0.326752	0.352831
275	-0.741239	0.19536	0.581977	0.170326	-0.130198	0.272357	-0.0387025	-0.00151762	0.768458	-0.213753	0.109147	0.553437	0.404336	0.575881	0.430467	0.0303958	-0.0525896	0.377379	275	0.412597	-1.21019	-0.0656356	-0.0544052	-0.241301	-0.485006	0.337909	0.623397	-0.595285	-0.21883	-0.0270401	0.0527856	0.194927	-0.101681	0.382034	-0.156397	-0.847941	-0.018581	0.512734	-0.352526	0.834249	-0.13122	0.365508	0.19173	0.161128	0.326153	0.400605	0.681316	0.673067	-0.959252
276	-0.0932706	0.500301	0.591994	-0.102672	0.0805945	0.240047	0.277841	-0.102242	0.30831	-0.269893	-0.713183	0.290906	0.670403	-0.68476	0.595186	-0.335583	-0.381961	0.463898	276	0.380925	-1.33076	-0.0121838	0.0679972	-0.451199	0.121719	0.453192	0.421372	0.02369	0.221495	0.0896896	-0.355124	-0.571293	-0.36505	-0.0487374	-0.150533	-0.116745	0.120178	0.208161	0.213871	0.903431	0.421588	0.975236	-0.120217	-0.473959	-0.564478	-0.155346	0.179678	-0.0984099	0.105339
277	-0.436346	0.543237	0.193672	-0.310345	0.0523627	0.390596	-0.176159	0.30673	0.884398	0.338127	0.418977	0.317028	0.518917	-0.160303	-0.421936	0.309335	-0.322087	-0.0293128	277	0.150833	-1.09921	0.209963	0.14817	0.00935167	0.19755	0.0409151	0.306834	0.230271	0.132359	-0.367124	0.0267041	-0.154411	-0.0194495	0.165282	-0.0373747	-0.854271	0.248746	-0.448291	-0.473104	-0.197336	-0.0220612	0.383808	-1.30153	-0.434743	0.231948	0.780636	-0.0469553	-0.155549	0.404579
278	-0.607507	0.398583	0.09479	0.112519	0.105213	0.473764	0.121228	-0.0042421	0.283131	-0.702563	-0.0113457	0.143348	1.65443	-0.265511	-0.112641	0.476852	0.719009	0.741624	278	0.0658086	-0.755392	0.105255	-0.515049	-0.175556	0.146395	0.636187	0.0641324	-0.301189	-0.117433	0.307737	-0.18929	-0.422663	-0.0747359	0.056128	0.004751	-0.311616	0.174766	-0.187097	-0.0749648	0.0469453	1.33705	0.189295	0.0195416	0.127381	0.49135	-0.557112	-0.401058	-0.267152	0.357114
279	-0.952302	0.617365	-0.430052	-0.345745	0.105658	-0.143206	-0.183594	-0.0504892	0.507355	-0.478709	-0.0479045	0.622366	0.101999	-0.762563	0.0288983	0.518544	0.420535	0.194091	279	0.0669091	-1.3892	-0.222757	-0.576463	0.310359	0.0890714	0.229535	0.39561	-0.213391	-0.00300135	0.214949	-0.315685	-0.0508433	0.0727638	0.234453	-0.548627	0.250202	0.179252	0.832979	-0.491126	0.091857	0.614025	0.5362	0.628025	0.086917	0.00516397	0.0549591	-0.321052	0.146537	0.0885442
280	-0.180226	-0.0229108	-0.17525	0.438428	0.238437	0.155981	0.0919086	0.532931	0.459556	0.20697	-0.200996	0.443301	0.432416	0.0701255	-0.435117	0.158775	0.28286	0.239145	280	0.0417765	-1.42254	-0.157481	-0.291047	-0.446298	0.123269	0.538416	0.072094	-0.127506	-0.183849	-0.144607	-0.45052	-0.287605	-0.0578821	0.124787	-0.0944706	-0.226133	0.0499893	0.460742	-0.0831643	0.778308	0.461716	0.57882	0.166513	-0.430292	0.351496	-0.0475962	0.156587	0.392906	0.740915
281	-0.997986	0.287384	0.306438	0.227718	-0.0856512	0.364084	-0.286131	-0.614783	0.0472094	-0.21479	-0.10031	-0.0790238	1.52832	-0.124958	0.543658	-0.0612733	-0.0688445	-0.180934	281	0.153923	-0.984515	0.219415	0.0423396	0.316363	-0.0244007	0.24908	0.213532	-0.0884106	0.0178634	-0.141975	-0.51307	-0.119892	0.040152	0.286034	-0.0213767	-0.606246	0.179333	-0.81309	-0.161462	0.218561	0.137812	0.491724	-0.174864	-0.0125529	0.378629	-0.352504	-0.0413666	0.0198319	0.021176
282	-0.582838	0.0183886	0.208328	0.182667	-0.0850968	0.120311	0.0415385	-0.000127325	0.553833	-0.0424317	0.193931	0.751821	-0.346021	-0.721967	-0.0441849	-0.371469	0.117777	0.124412	282	-0.210612	-1.27117	0.151434	0.0618067	-0.164062	0.400868	0.158675	0.17805	-0.0809436	-0.117818	0.129618	-0.30402	0.208683	-0.0589195	-0.106445	0.233264	-0.537761	0.177266	-0.302547	0.320333	0.569665	0.249547	1.03862	0.0744604	-0.688934	0.0497743	-0.484301	0.0692391	0.722255	1.00384
283	-0.611683	1.03144	0.894298	0.216966	-0.0568462	0.258433	0.00740173	0.0885522	0.427552	0.319929	-0.268714	0.867834	0.317756	-0.676083	0.209836	0.238457	-0.303987	-0.190029	283	0.220006	-1.50228	0.0132871	-0.212824	-0.654679	0.16404	0.194287	0.426917	-0.090403	-0.0421521	0.0387972	-0.367441	0.102607	0.0397083	0.36472	0.526751	-0.288666	-0.292802	-0.122052	-0.78619	0.306255	0.414636	-0.481196	0.615413	-0.340678	0.820497	0.395557	-0.10973	0.537243	0.647477
284	-1.05811	0.536758	0.265982	0.123646	0.189683	-0.034703	-0.267169	0.0380566	0.784931	-1.79017	0.233436	1.05309	1.07678	-0.564951	-0.836138	0.28316	0.266043	-0.249881	284	0.225873	-1.16	0.22972	-0.252868	-0.221791	0.222675	0.0182953	0.215276	-0.302543	0.000650505	-0.182332	-0.375946	-0.0390512	-0.412321	0.347602	0.09952	-0.339012	-0.0508239	0.325976	-0.281352	-0.291321	0.223062	0.892177	-0.376839	-0.417353	0.0602533	0.731815	-0.461992	-0.209345	0.167701
285	-2.17116	0.427878	-0.0194476	0.191886	0.298557	-0.0276153	-0.0653682	0.12721	-0.632839	0.303603	-0.311634	0.660415	0.410509	-0.897312	0.577444	0.729396	-0.269187	-0.138222	285	0.215195	-1.40886	0.027148	0.376882	-0.889177	0.678665	0.405814	0.681499	-0.308898	0.133555	0.11016	-0.266785	0.0088762	0.196869	0.167511	0.171309	-0.407883	0.0280292	-0.453804	-0.296459	0.433736	0.187566	-0.223269	0.680967	0.523535	-0.398037	0.396842	0.148716	0.682387	-0.410163
286	-0.717748	0.344606	-0.873476	-0.62574	0.0351383	-0.0503751	-0.689068	-0.456104	0.110697	-0.564059	-0.55162	-0.314999	0.367856	-0.200212	0.225764	0.181789	0.397483	-0.0724214	286	0.500852	-1.37716	0.184418	-0.130541	0.143486	-0.125498	0.487565	0.480718	-0.147723	-0.10969	0.179889	-0.224041	-0.15993	-0.362717	-0.188779	0.13868	-0.650473	0.297794	-0.984889	-0.0721415	-0.292001	-0.19442	-0.248501	-0.46358	0.18816	-0.315659	0.0952224	0.18583	0.153676	0.448798
287	-0.410924	-0.119367	0.386353	-0.224722	0.352431	0.0930396	0.265284	-0.347288	0.543695	-0.0201255	-0.321317	0.456602	0.573483	-0.19697	-0.659135	0.218808	0.425531	0.140026	287	0.584251	-1.08631	-0.144883	-0.334978	-0.293905	-0.231041	0.18697	0.0987388	-0.136249	-0.206248	-0.084652	-0.116661	-0.388745	0.00509305	0.362924	-0.00378593	-0.815844	0.00618804	0.170267	0.225233	-0.0386056	-0.0407686	-0.511763	-0.225956	-0.993896	0.211649	0.0354107	0.423123	0.229058	0.0679842
288	-0.90221	0.758223	0.290116	-0.125408	0.0940371	-0.122014	-0.38626	-0.394505	0.314535	0.269037	0.11461	-0.291599	0.327303	-0.574678	-0.398657	-0.166869	0.317399	-0.146551	288	0.4448	-1.2698	-0.242219	-0.162367	-0.406737	0.297438	0.291257	0.0427424	-0.226214	-0.0621468	-0.0487386	0.306085	0.342352	-0.336179	-0.377363	-0.232296	-0.676529	0.0752156	-0.170363	1.61929	0.156847	0.717058	1.429	-0.731462	0.0322534	0.936388	0.191232	-0.0280675	0.457883	0.784553
289	-0.839964	1.12982	0.471468	0.356246	0.207832	0.105466	-0.355165	-0.345295	0.195546	0.304574	-0.735615	0.131957	0.0729855	-0.267607	-0.298069	0.410071	0.351287	0.204699	289	0.350757	-1.14226	-0.164287	-0.713056	-0.184388	0.250905	0.222658	-0.300884	-0.539872	0.182851	0.0676716	0.18743	0.00365079	-0.301672	0.00865031	-0.14703	-0.510411	-0.152448	-0.737002	-0.591004	1.0776	0.0615683	1.17846	-1.02958	-0.457902	-0.398259	-0.0355742	-0.141778	0.173472	-0.22023
[truncated: 336 more rows]
[truncated: 31 more columns]

## Sheet: Fig 8E
Source Data	Figure 8E	ASH VGLUT-pH data: individual dF/F(%) traces
[truncated: 657 more rows]

[truncated: 2 more sheets: Fig 8F,G, Supporting Stats Fig 8A,B,D]
