# Supplementary figures and images for: Diverse modes of synaptic signaling, regulation, and plasticity distinguish two classes of C. elegans glutamatergic neurons
Source: eLife journal article supplement (doi:10.7554/elife.31234), 2017-11-21

**A**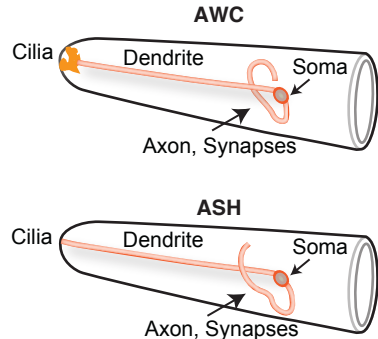**B**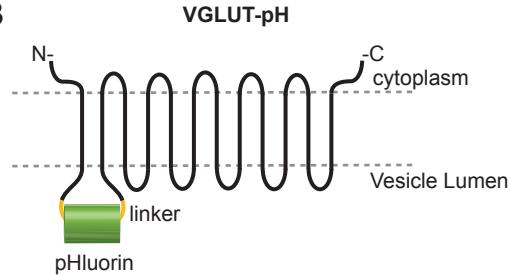**C**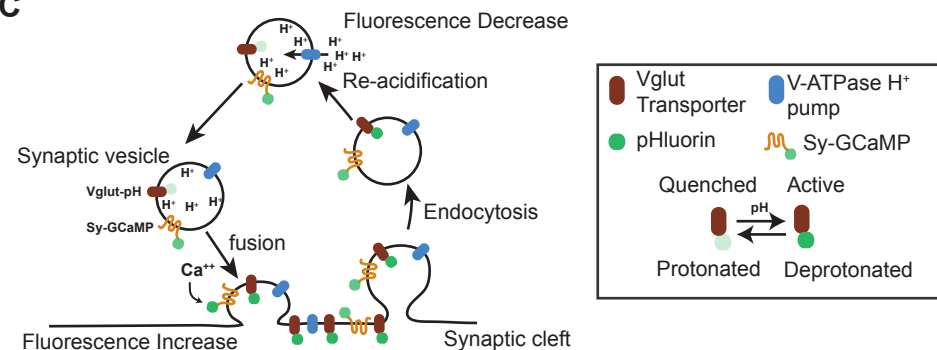**D**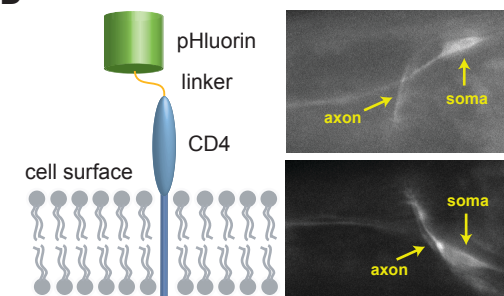**E**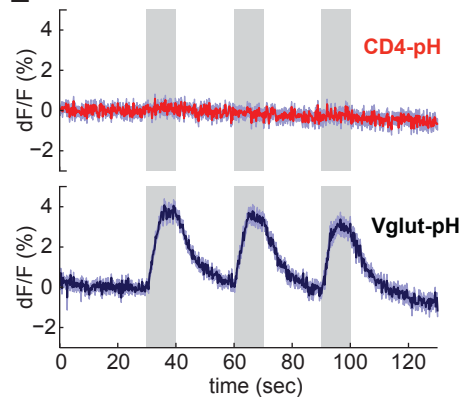

Supplement: supp [file elife_poa_e31234_Figure_1_figure_supplement_1.pdf › elife_poa_e31234_Figure_1_figure_supplement_1.pdf]
